# Supplementary material
Source: publisher site journal article supplement (https://www.dovepress.com/article/449827)
Supplement: Supplementary file 1 [file get_supplementary_file.php]

Supplementary Table S1 81 differentially expressed lincRNAs between PTC tissues and normal tissues.

| Gene               |                                 | logFC        | AveExpr     | t            | P. Value | adj. P. Val | B           |
|--------------------|---------------------------------|--------------|-------------|--------------|----------|-------------|-------------|
| ENSG00000271367.1  | lincRNA RP3-483K16.4            | -1.769286065 | 0.736696324 | -26.84685983 | 1.00E-94 | 1.41E-90    | 205.3656269 |
| ENSG00000227199.1  | antisense ST7-AS1               | -1.137189039 | 1.270074573 | -20.17860879 | 1.39E-64 | 4.27E-62    | 136.3523681 |
| ENSG00000223914.1  | lincRNA AC079630.2              | 3.409080522  | 3.322322966 | 19.44396132  | 3.11E-61 | 6.85E-59    | 128.6824279 |
| ENSG00000260912.1  | sense_overlapping RP11-363E7.4  | 1.256643429  | 2.509948871 | 17.78672574  | 1.02E-53 | 1.02E-51    | 111.4752572 |
| ENSG00000256268.1  | lincRNA RP11-221N13.3           | 1.566270601  | 1.486207192 | 17.52417742  | 1.54E-52 | 1.40E-50    | 108.7684892 |
| ENSG00000204282.4  | processed_transcript TNRC6C-AS1 | 1.84118627   | 2.428052169 | 17.48244822  | 2.38E-52 | 2.12E-50    | 108.3389098 |
| ENSG00000261399.1  | antisense LA16c-329F2.1         | -2.403315424 | 1.300329693 | -17.35147845 | 9.22E-52 | 7.83E-50    | 106.9918349 |
| ENSG00000228559.1  | lincRNA RP3-340B19.3            | -1.427397245 | 2.115193451 | -17.23595478 | 3.04E-51 | 2.35E-49    | 105.8051762 |
| ENSG00000225194.2  | lincRNA LINC00092               | -1.354664018 | 1.05195302  | -16.71969494 | 6.18E-49 | 4.18E-47    | 100.5214932 |
| ENSG00000234807.5  | lincRNA LINC01135               | -1.0302224   | 1.105129725 | -16.24990632 | 7.54E-47 | 4.23E-45    | 95.7443212  |
| ENSG00000235070.3  | lincRNA AC068138.1              | -2.554825414 | 1.29521261  | -16.20599868 | 1.18E-46 | 6.53E-45    | 95.29950056 |
| ENSG00000249684.4  | antisense RP11-423H2.3          | -1.334737048 | 0.906503625 | -16.18693492 | 1.43E-46 | 7.85E-45    | 95.10646225 |
| ENSG00000250343.1  | antisense CTC-255N20.1          | 1.402144191  | 1.62064758  | 15.98462666  | 1.12E-45 | 5.76E-44    | 93.06146794 |
| ENSG00000255020.1  | antisense AF131216.5            | -1.920251189 | 1.010284473 | -15.56783483 | 7.59E-44 | 3.50E-42    | 88.87017487 |
| ENSG00000268307.1  | lincRNA CTD-2619J13.13          | 2.082546785  | 2.267319761 | 15.3670549   | 5.72E-43 | 2.45E-41    | 86.86234781 |
| ENSG00000204934.9  | antisense ATP6VOE2-AS1          | -1.134862301 | 0.864833292 | -15.21797922 | 2.55E-42 | 1.04E-40    | 85.37660642 |
| ENSG00000260992.1  | antisense DOCK9-AS2             | 1.59211884   | 3.672384205 | 15.13538951  | 5.83E-42 | 2.27E-40    | 84.55540119 |
| ENSG00000232415.1  | antisense CTB-51J22.1           | -1.101614898 | 1.657122269 | -15.07105021 | 1.11E-41 | 4.18E-40    | 83.91663107 |
| ENSG00000272482.1  | lincRNA RP11-474021.5           | 3.278904782  | 3.947554566 | 15.00898353  | 2.06E-41 | 7.54E-40    | 83.30124049 |
| ENSG00000263470.1  | lincRNA RP11-16005.1            | -1.107220182 | 1.329090931 | -14.8190155  | 1.36E-40 | 4.67E-39    | 81.42281659 |
| ENSG00000231107.1  | lincRNA LINC01508               | -1.032354727 | 0.959168145 | -14.71000017 | 4.02E-40 | 1.32E-38    | 80.34843601 |
| ENSG00000254343.2  | lincRNA RP11-760H22.2           | -1.796754995 | 3.145424364 | -14.7091812  | 4.05E-40 | 1.32E-38    | 80.34037488 |
| ENSG00000272622.1  | lincRNA RP11-395N3.2            | -1.123368627 | 1.019113451 | -14.47446726 | 4.12E-39 | 1.23E-37    | 78.036449   |
| ENSG00000273132.1  | antisense RP11-350J20.12        | 1.731898721  | 1.695274864 | 14.41530895  | 7.37E-39 | 2.17E-37    | 77.45780221 |
| ENSG00000235978.5  | antisense AC018816.3            | 1.397539599  | 1.608152292 | 14.24688917  | 3.85E-38 | 1.08E-36    | 75.81509396 |
| ENSG00000225342.2  | antisense AC079630.4            | 2.35915315   | 2.854220961 | 14.24011786  | 4.12E-38 | 1.15E-36    | 75.74919563 |
| ENSG00000264608.1  | sense_intronic RP11-192H23.8    | -1.280589195 | 1.633766817 | -13.92177522 | 9.18E-37 | 2.28E-35    | 72.66433518 |
| ENSG00000267268.1  | lincRNA AC007204.2              | -1.961876937 | 1.454642954 | -13.82082639 | 2.45E-36 | 5.83E-35    | 71.69168215 |
| ENSG00000228216.1  | lincRNA RP11-367F23.1           | -1.217079797 | 0.917601471 | -13.35202342 | 2.22E-34 | 4.54E-33    | 67.21208474 |
| ENSG00000237187.7  | antisense NR2F1-AS1             | 1.235702101  | 1.43934253  | 13.31499661  | 3.17E-34 | 6.34E-33    | 66.86100502 |
| ENSG00000182109.6  | antisense RP11-69E11.4          | -2.051686517 | 1.936425567 | -13.27815053 | 4.50E-34 | 8.89E-33    | 66.51204906 |
| ENSG00000226786.2  | antisense RP1-167F1.2           | -1.234909267 | 1.485082001 | -13.20070249 | 9.41E-34 | 1.83E-32    | 65.77991283 |
| ENSG00000270000.1  | lincRNA RP3-449M8.9             | 1.282226796  | 1.875454747 | 13.19947094  | 9.52E-34 | 1.85E-32    | 65.76828548 |
| ENSG00000186594.11 | lincRNA MIR22HG                 | -1.385567601 | 3.107212195 | -13.1340589  | 1.77E-33 | 3.37E-32    | 65.15139111 |
| ENSG00000177133.9  | antisense LINC00982             | -1.237949713 | 1.182659054 | -12.99279761 | 6.75E-33 | 1.22E-31    | 63.82374176 |
| ENSG00000256969.1  | lincRNA RP11-320N7.2            | 1.285406266  | 1.452739037 | 12.99140393  | 6.84E-33 | 1.24E-31    | 63.81067473 |
| ENSG00000251615.3  | lincRNA RP11-77403.3            | -1.10453698  | 1.86399523  | -12.9857821  | 7.21E-33 | 1.30E-31    | 63.75797127 |
| ENSG00000274565.1  | antisense CTD-3035K23.7         | 1.191867002  | 1.227742488 | 12.77221966  | 5.38E-32 | 9.08E-31    | 61.76346158 |
| ENSG00000224020.1  | antisense MIR181A2HG            | 1.382505118  | 2.604212168 | 12.67095709  | 1.39E-31 | 2.30E-30    | 60.82301845 |
| ENSG00000258844.1  | lincRNA RP11-259K15.2           | 1.170292641  | 1.990009551 | 12.62575954  | 2.12E-31 | 3.46E-30    | 60.4043791  |
| ENSG00000259330.1  | antisense INAFM2                | -1.158882225 | 4.861747246 | -12.56325946 | 3.79E-31 | 6.04E-30    | 59.82662736 |
| ENSG00000261488.1  | antisense RP11-757F18.5         | -1.065691194 | 1.29069129  | -12.27118743 | 5.65E-30 | 8.22E-29    | 57.14483563 |
| ENSG00000197301.6  | antisense RP11-366L20.2         | 1.003554286  | 1.154345228 | 11.93616779  | 1.21E-28 | 1.59E-27    | 54.10694979 |
| ENSG00000261786.1  | lincRNA RP4-555D20.2            | -1.568984326 | 2.136214042 | -11.91292728 | 1.49E-28 | 1.95E-27    | 53.8977815  |
| ENSG00000272079.2  | lincRNA LA16c-380H5.5           | 1.204933898  | 2.22110197  | 11.89635641  | 1.73E-28 | 2.24E-27    | 53.74876821 |
| ENSG00000225285.1  | lincRNA RP4-758J18.10           | 1.196971045  | 1.384440969 | 11.8959714   | 1.74E-28 | 2.25E-27    | 53.74530731 |
| ENSG00000267128.1  | antisense RP11-449J21.5         | -1.015664129 | 0.850362289 | -11.8743333  | 2.12E-28 | 2.72E-27    | 53.55088994 |
| ENSG00000237463.4  | antisense RP11-28001.2          | 1.887255488  | 1.675174123 | 11.76636745  | 5.61E-28 | 7.00E-27    | 52.58354853 |
| ENSG00000260943.1  | lincRNA RP11-476D10.1           | 2.172365487  | 2.019923606 | 11.74543787  | 6.78E-28 | 8.38E-27    | 52.39655582 |
| ENSG00000258999.1  | antisense RP11-114N19.3         | -1.011600756 | 1.804760641 | -11.74049713 | 7.08E-28 | 8.73E-27    | 52.35243866 |
| ENSG00000260057.4  | lincRNA LINC01571               | -1.512952062 | 2.226127324 | -11.73949405 | 7.15E-28 | 8.80E-27    | 52.34348304 |
| ENSG00000237512.5  | antisense UNC5B-AS1             | 1.193795764  | 1.110953375 | 11.72899193  | 7.86E-28 | 9.65E-27    | 52.24974327 |
| ENSG00000259884.1  | lincRNA RP11-1100L3.8           | -1.375684319 | 1.237021327 | -11.72764279 | 7.95E-28 | 9.75E-27    | 52.23770426 |
| ENSG00000245571.5  | lincRNA AP001258.4              | 1.00239138   | 2.654602435 | 11.60979432  | 2.29E-27 | 2.68E-26    | 51.18889654 |
| ENSG00000233705.5  | antisense SLC26A4-AS1           | -3.327915121 | 4.1856708   | -11.54506    | 4.09E-27 | 4.70E-26    | 50.61516988 |
| ENSG00000260011.2  | lincRNA RP13-20L14.1            | -1.040582427 | 0.735945841 | -11.34067058 | 2.51E-26 | 2.71E-25    | 48.81503594 |
| ENSG00000259005.1  | lincRNA RP3-449M8.6             | 1.032437848  | 1.432775603 | 11.27764435  | 4.38E-26 | 4.62E-25    | 48.26347092 |
| ENSG00000171889.3  | sense_overlapping MIR31HG       | 1.384333484  | 1.781604741 | 11.20986571  | 7.95E-26 | 8.26E-25    | 47.67220525 |
| ENSG00000223813.2  | antisense AC007255.8            | 1.805596472  | 1.732681989 | 11.18855563  | 9.59E-26 | 9.89E-25    | 47.48671493 |
| ENSG00000214797.3  | lincRNA RP11-1036E20.9          | 1.418603909  | 1.272745651 | 10.95339734  | 7.47E-25 | 7.28E-24    | 45.45297995 |
| ENSG00000259264.4  | antisense RP11-60L3.1           | 1.07872058   | 0.958442661 | 10.89925496  | 1.19E-24 | 1.15E-23    | 44.98820926 |
| ENSG00000272384.1  | lincRNA RP11-44N11.2            | 1.480607659  | 1.528525999 | 10.61200088  | 1.41E-23 | 1.25E-22    | 42.54471701 |
| ENSG00000257647.1  | lincRNA RP11-701H24.3           | -1.076661339 | 1.542450713 | -10.51555964 | 3.19E-23 | 2.78E-22    | 41.73296954 |
| ENSG00000276851.1  | lincRNA RP5-875H18.9            | 1.41761832   | 1.531874902 | 10.4888899   | 4.00E-23 | 3.44E-22    | 41.50926969 |
| ENSG00000271347.1  | sense_intronic RP11-701H24.7    | -1.029583067 | 2.198055002 | -10.17216164 | 5.71E-22 | 4.49E-21    | 38.87898901 |
| ENSG00000257849.1  | lincRNA RP11-547C5.1            | 1.157874007  | 1.084924173 | 9.967068132  | 3.11E-21 | 2.30E-20    | 37.20238975 |
| ENSG00000274877.1  | antisense RP11-65I12.1          | -1.197377805 | 1.803157558 | -9.890653094 | 5.81E-21 | 4.22E-20    | 36.58320578 |
| ENSG00000229116.2  | lincRNA RP11-20J15.3            | 1.180112063  | 1.248243217 | 9.789948473  | 1.32E-20 | 9.31E-20    | 35.77183878 |
| ENSG00000216921.6  | lincRNA AC131097.4              | -1.205672202 | 1.331959305 | -9.703184291 | 2.67E-20 | 1.84E-19    | 35.07706267 |
| ENSG00000259417.2  | lincRNA LINC01314               | 1.535295404  | 1.807003314 | 9.217256437  | 1.27E-18 | 7.73E-18    | 31.26120735 |
| ENSG00000272043.1  | lincRNA RP11-44N11.3            | 1.078542162  | 1.109718314 | 9.121168269  | 2.68E-18 | 1.59E-17    | 30.52221305 |
| ENSG00000259104.2  | lincRNA PTCSC3                  | -1.44823819  | 5.055713115 | -9.06506952  | 4.13E-18 | 2.42E-17    | 30.09320737 |

|                   |                                |              |             |              |          |          |             |
|-------------------|--------------------------------|--------------|-------------|--------------|----------|----------|-------------|
| ENSG00000224568.1 | lincRNA AC096669.3             | -1.712258672 | 1.568430047 | -8.912395221 | 1.34E-17 | 7.49E-17 | 28.93487206 |
| ENSG00000270069.1 | lincRNA MIR222HG               | 1.191142759  | 2.559568307 | 8.665169972  | 8.69E-17 | 4.59E-16 | 27.08828838 |
| ENSG00000267108.1 | lincRNA RP11-861E21.1          | 1.032165018  | 1.295600355 | 8.431792479  | 4.92E-16 | 2.44E-15 | 25.37898236 |
| ENSG00000259342.1 | antisense RP11-519G16.5        | 1.151413094  | 1.420997449 | 8.430576256  | 4.96E-16 | 2.46E-15 | 25.37016218 |
| ENSG00000225969.1 | antisense ABHD11-AS1           | 1.280176451  | 2.347852109 | 8.309268495  | 1.21E-15 | 5.83E-15 | 24.49505446 |
| ENSG00000178947.8 | lincRNA LINC00086              | 1.267685355  | 3.44225135  | 8.269445459  | 1.61E-15 | 7.69E-15 | 24.20978391 |
| ENSG00000278044.1 | lincRNA XXbac-B33L19.12        | 1.018804982  | 1.013781274 | 7.581005009  | 2.05E-13 | 8.27E-13 | 19.44020067 |
| ENSG00000260997.1 | sense_overlapping RP4-647J21.1 | 1.188067145  | 1.532534935 | 6.923087173  | 1.57E-11 | 5.42E-11 | 15.18243718 |
| ENSG00000229457.1 | lincRNA AC006227.1             | -1.118388419 | 1.138959833 | -6.629575289 | 9.88E-11 | 3.20E-10 | 13.3828336  |

Supplementary Table S2 56 lncRNAs associated with m6A RNA methylation

| lncRNA        | m6A_genes | cor          | p. value |
|---------------|-----------|--------------|----------|
| SLC26A4-AS1   | IGF2BP2   | -0.505442574 | 0        |
| SLC26A4-AS1   | ALKBH5    | 0.553949739  | 0        |
| AC068138.1    | YTHDC1    | 0.521163594  | 6.14E-32 |
| AC068138.1    | IGF2BP3   | 0.507973802  | 3.56E-30 |
| AC068138.1    | FTO       | 0.522717766  | 3.76E-32 |
| LA16c-329F2.1 | IGF2BP2   | -0.578655974 | 1.34E-40 |
| LA16c-329F2.1 | ALKBH5    | 0.570515765  | 2.87E-39 |
| AC007204.2    | YTHDC1    | 0.627512969  | 1.94E-49 |
| AC007204.2    | METTL14   | 0.531093739  | 2.56E-33 |
| AC007204.2    | FTO       | 0.537285226  | 3.35E-34 |
| AC007204.2    | ALKBH5    | 0.517934348  | 1.69E-31 |
| AF131216.5    | IGF2BP2   | -0.589515922 | 1.95E-42 |
| AF131216.5    | ALKBH5    | 0.579273961  | 1.06E-40 |
| RP11-760H22.2 | IGF2BP2   | -0.551709847 | 0        |
| RP4-555D20.2  | YTHDC1    | 0.542828147  | 0        |
| RP4-555D20.2  | METTL3    | 0.575022198  | 0        |
| PTCSC3        | YTHDC1    | 0.515590685  | 3.49E-31 |
| RP3-340B19.3  | IGF2BP2   | -0.524958938 | 0        |
| LINC00092     | IGF2BP2   | -0.570637019 | 0        |
| RP11-423H2.3  | IGF2BP2   | -0.61378203  | 0        |
| LINC00982     | METTL3    | 0.504629564  | 0        |
| RP1-167F1.2   | YTHDC1    | 0.541180284  | 0        |
| RP1-167F1.2   | METTL3    | 0.510455524  | 0        |
| RP1-167F1.2   | FTO       | 0.507037107  | 0        |
| RP11-367F23.1 | IGF2BP3   | 0.547129691  | 1.21E-35 |
| AC131097.4    | IGF2BP2   | -0.533139748 | 1.32E-33 |
| RP11-65I12.1  | YTHDC1    | 0.612378552  | 0        |
| RP11-65I12.1  | YTHDC2    | 0.684352386  | 0        |
| RP11-65I12.1  | ZC3H13    | 0.603092333  | 0        |
| RP11-65I12.1  | METTL3    | 0.530107484  | 0        |
| RP11-65I12.1  | FTO       | 0.552677743  | 0        |
| INAFM2        | IGF2BP2   | -0.501853953 | 0        |
| INAFM2        | ALKBH5    | 0.568076575  | 0        |
| ST7-AS1       | IGF2BP2   | -0.52713245  | 0        |
| ATP6VOE2-AS1  | IGF2BP2   | -0.617445542 | 0        |
| ATP6VOE2-AS1  | ALKBH5    | 0.510279079  | 0        |
| RP11-395N3.2  | YTHDC1    | 0.519683164  | 0        |
| RP11-395N3.2  | ALKBH5    | 0.545976364  | 0        |
| AC006227.1    | ALKBH5    | 0.516836009  | 2.37E-31 |
| RP11-77403.3  | YTHDC1    | 0.59040798   | 0        |
| RP11-77403.3  | METTL3    | 0.527230318  | 0        |
| RP11-77403.3  | ALKBH5    | 0.574658385  | 0        |

|                |           |               |           |
|----------------|-----------|---------------|-----------|
| CTB-51J22. 1   | ALKBH5    | 0. 518768031  | 0         |
| RP11-701H24. 3 | YTHDC1    | 0. 67948147   | 9. 50E-61 |
| RP11-701H24. 3 | METTL14   | 0. 664125691  | 3. 60E-57 |
| RP11-701H24. 3 | YTHDC2    | 0. 602580454  | 9. 75E-45 |
| RP11-701H24. 3 | YTHDF3    | 0. 694256848  | 2. 10E-64 |
| RP11-701H24. 3 | KIAA1429  | 0. 695414528  | 1. 06E-64 |
| RP11-701H24. 3 | ZC3H13    | 0. 801607447  | 1. 12E-99 |
| RP11-701H24. 3 | FTO       | 0. 724103763  | 1. 63E-72 |
| RP13-20L14. 1  | METTL3    | 0. 573590387  | 9. 10E-40 |
| LINC01508      | IGF2BP2   | -0. 531247571 | 0         |
| LINC01135      | YTHDC1    | 0. 572695359  | 0         |
| LINC01135      | METTL14   | 0. 526612617  | 0         |
| LINC01135      | FTO       | 0. 626082146  | 0         |
| RP11-701H24. 7 | YTHDC1    | 0. 613255673  | 0         |
| RP11-701H24. 7 | METTL14   | 0. 566859754  | 0         |
| RP11-701H24. 7 | YTHDC2    | 0. 553735139  | 0         |
| RP11-701H24. 7 | YTHDF3    | 0. 668360958  | 0         |
| RP11-701H24. 7 | KIAA1429  | 0. 582491199  | 0         |
| RP11-701H24. 7 | ZC3H13    | 0. 667074779  | 0         |
| RP11-701H24. 7 | FTO       | 0. 583695113  | 0         |
| RP11-449J21. 5 | ALKBH5    | 0. 581608121  | 0         |
| RP11-114N19. 3 | YTHDC1    | 0. 601208027  | 0         |
| RP11-114N19. 3 | HNRNPA2B1 | 0. 502073943  | 0         |
| RP11-114N19. 3 | METTL3    | 0. 600265377  | 0         |
| AP001258. 4    | IGF2BP2   | 0. 608231092  | 0         |
| AP001258. 4    | ALKBH5    | -0. 505963542 | 0         |
| RP11-366L20. 2 | IGF2BP2   | 0. 581272109  | 0         |
| RP3-449M8. 6   | IGF2BP2   | 0. 587639599  | 4. 10E-42 |
| RP11-60L3. 1   | IGF2BP2   | 0. 591164112  | 1. 01E-42 |
| RP11-20J15. 3  | IGF2BP2   | 0. 585639013  | 8. 99E-42 |
| MIR222HG       | IGF2BP2   | 0. 52236885   | 0         |
| MIR222HG       | FTO       | -0. 509599537 | 0         |
| CTD-3035K23. 7 | FTO       | -0. 503155315 | 1. 50E-29 |
| UNC5B-AS1      | FTO       | -0. 601554263 | 1. 49E-44 |
| NR2F1-AS1      | IGF2BP2   | 0. 502790362  | 0         |
| ABHD11-AS1     | FTO       | -0. 522362184 | 0         |
| RP3-449M8. 9   | IGF2BP2   | 0. 55250073   | 0         |
| RP11-320N7. 2  | YTHDC1    | -0. 503792762 | 1. 24E-29 |
| RP11-320N7. 2  | FTO       | -0. 526566281 | 1. 11E-32 |
| MIR31HG        | IGF2BP2   | 0. 530987854  | 2. 65E-33 |
| AC018816. 3    | IGF2BP3   | -0. 568204093 | 6. 74E-39 |
| AC018816. 3    | FTO       | -0. 619708979 | 0         |
| CTC-255N20. 1  | IGF2BP2   | 0. 522968112  | 0         |
| RP5-875H18. 9  | YTHDC1    | -0. 561254465 | 8. 47E-38 |
| RP5-875H18. 9  | FTO       | -0. 58100303  | 5. 44E-41 |

|                 |         |               |           |
|-----------------|---------|---------------|-----------|
| RP5-875H18. 9   | ALKBH5  | -0. 579806491 | 8. 61E-41 |
| RP11-1036E20. 9 | IGF2BP2 | 0. 559925446  | 1. 36E-37 |
| RP11-1036E20. 9 | ALKBH5  | -0. 57830756  | 1. 53E-40 |
| RP11-221N13. 3  | IGF2BP2 | 0. 676969807  | 3. 79E-60 |
| DOCK9-AS2       | IGF2BP2 | 0. 604089023  | 0         |
| DOCK9-AS2       | IGF2BP3 | -0. 562440375 | 5. 52E-38 |
| RP11-350J20. 12 | FTO     | -0. 56919045  | 4. 68E-39 |
| RP11-350J20. 12 | ALKBH5  | -0. 554940425 | 8. 01E-37 |
| AC007255. 8     | IGF2BP2 | 0. 580119977  | 7. 63E-41 |
| TNRC6C-AS1      | IGF2BP2 | 0. 645197111  | 0         |
| TNRC6C-AS1      | IGF2BP3 | -0. 579447003 | 9. 88E-41 |
| TNRC6C-AS1      | FTO     | -0. 505232088 | 0         |
| RP11-28001. 2   | IGF2BP2 | 0. 677941679  | 2. 22E-60 |
| RP11-28001. 2   | IGF2BP3 | -0. 538604992 | 2. 16E-34 |
| CTD-2619J13. 13 | IGF2BP2 | 0. 500563448  | 3. 23E-29 |
| CTD-2619J13. 13 | FTO     | -0. 595590368 | 1. 71E-43 |
| RP11-474021. 5  | IGF2BP2 | 0. 569801598  | 0         |
| AC079630. 2     | IGF2BP2 | 0. 511776909  | 1. 12E-30 |

Supplementary Table S3 GSVA results for GO

| id                                                                                | logFC        | AveExpr      | t            | P. Value | adj. P. Val | B           |
|-----------------------------------------------------------------------------------|--------------|--------------|--------------|----------|-------------|-------------|
| GO_TRICARBOXYLIC_ACID_CYCLE                                                       | -0.1572966   | -0.040101534 | -6.364812424 | 5.56E-10 | 2.83E-06    | 12.35105961 |
| GO_CRISTAE_FORMATION                                                              | -0.146268122 | -0.052814969 | -6.330428459 | 6.80E-10 | 3.47E-06    | 12.15719245 |
| GO_2_OXOGLUTARATE_METABOLIC_PROCESS                                               | -0.142364476 | -0.047106546 | -6.090470305 | 2.73E-09 | 1.39E-05    | 10.82802204 |
| GO_AEROBIC_RESPIRATION                                                            | -0.137134455 | -0.047353705 | -6.054898643 | 3.34E-09 | 1.70E-05    | 10.63456129 |
| GO_INNER_MITOCHONDRIAL_MEMBRANE_ORGANIZATION                                      | -0.135755815 | -0.051518592 | -5.880101915 | 8.89E-09 | 4.52E-05    | 9.697520773 |
| GO_L_ASPARTATE_TRANSMEMBRANE_TRANSPORT                                            | -0.124457487 | -0.016915384 | -5.928167698 | 6.81E-09 | 3.46E-05    | 9.952922732 |
| GO_COENZYME_A_METABOLIC_PROCESS                                                   | -0.123908018 | -0.032172532 | -5.795420463 | 1.42E-08 | 7.20E-05    | 9.251774046 |
| GO_REGULATION_OF_MITOCHONDRIAL_FUSION                                             | -0.123778703 | -0.029317035 | -6.556052735 | 1.78E-10 | 9.07E-07    | 13.44468346 |
| GO_NUCLEOBASE_TRANSPORT                                                           | -0.121115856 | -0.015916984 | -5.5804679   | 4.53E-08 | 0.00022888  | 8.144715888 |
| GO_MITOCHONDRIAL_FUSION                                                           | -0.120864644 | -0.034666905 | -6.97983999  | 1.30E-11 | 6.63E-08    | 15.95886731 |
| GO_UDP_N_ACETYLGLUCOSAMINE_BIOSYNTHETIC_PROCESS                                   | -0.120282451 | -0.009723164 | -5.074332897 | 6.06E-07 | 0.003021363 | 5.679607204 |
| GO_PTERIDINE_CONTAINING_COMPOUND_BIOSYNTHETIC_PROCESS                             | -0.118588293 | -0.027846846 | -5.465774219 | 8.29E-08 | 0.000418099 | 7.568521486 |
| GO_CELLULAR_RESPIRATION                                                           | -0.117785284 | -0.042055253 | -5.04116365  | 7.13E-07 | 0.003549278 | 5.525146467 |
| GO_AMINO_SUGAR_BIOSYNTHETIC_PROCESS                                               | -0.117032293 | -0.008440047 | -5.151930057 | 4.12E-07 | 0.002060005 | 6.044403152 |
| GO_REGULATION_OF_TRANSLATIONAL_FIDELITY                                           | -0.114176792 | -0.0424978   | -5.248579713 | 2.54E-07 | 0.001271555 | 6.505481824 |
| GO_CERAMIDE_CATABOLIC_PROCESS                                                     | -0.11284477  | -0.017195137 | -5.942505265 | 6.28E-09 | 3.19E-05    | 10.02944076 |
| GO_COENZYME_A_BIOSYNTHETIC_PROCESS                                                | -0.110364848 | -0.031574096 | -4.637759816 | 4.83E-06 | 0.023625309 | 3.718151438 |
| GO_FATTY_ACID_BETA_OXIDATION_USING_ACYL_COA_OXIDASE                               | -0.107975017 | -0.038549823 | -4.643357899 | 4.71E-06 | 0.023036332 | 3.742312618 |
| GO_AMINO_ACID_ACTIVATION                                                          | -0.107658628 | -0.043103288 | -4.810254528 | 2.17E-06 | 0.010686463 | 4.47452701  |
| GO_MITOCHONDRIAL_DNA_METABOLIC_PROCESS                                            | -0.105345412 | -0.027943405 | -5.614528165 | 3.78E-08 | 0.000191018 | 8.317780939 |
| GO_ENDOSOME_TO_LYSOSOME_TRANSPORT                                                 | -0.104820218 | -0.018658082 | -5.763031936 | 1.69E-08 | 8.59E-05    | 9.082716343 |
| GO_GLYCOLIPID_CATABOLIC_PROCESS                                                   | -0.102870613 | -0.01760436  | -4.635200702 | 4.89E-06 | 0.023894039 | 3.707115032 |
| GO_TRICARBOXYLIC_ACID_METABOLIC_PROCESS                                           | -0.102222996 | -0.037422517 | -4.856632075 | 1.74E-06 | 0.008592378 | 4.682060193 |
| GO_PIGMENT_GRANULE_MATURATION                                                     | -0.10122959  | -0.023153065 | -4.667207216 | 4.22E-06 | 0.020683382 | 3.845536784 |
| GO_MEMBRANE_DISRUPTION_IN_OTHER_ORGANISM                                          | 0.100323329  | 0.090451998  | 4.679619368  | 3.98E-06 | 0.019549212 | 3.899445223 |
| GO_SOMATIC_STEM_CELL_DIVISION                                                     | 0.100485858  | 0.018827953  | 4.681943659  | 3.94E-06 | 0.01934851  | 3.90955425  |
| GO_REGULATION_OF_MESONEPHROS_DEVELOPMENT                                          | 0.100824974  | 0.030245942  | 6.414049637  | 4.15E-10 | 2.12E-06    | 12.63014583 |
| GO_REGULATION_OF_DOPAMINERGIC_NEURON_DIFFERENTIATION                              | 0.101530973  | 0.047353322  | 4.814281913  | 2.13E-06 | 0.010487332 | 4.492479227 |
| GO_REGULATION_OF_ODONTOGENESIS_OF_DENTIN_CONTAINING_TOOTH                         | 0.102317252  | 0.044663418  | 5.209912153  | 3.08E-07 | 0.001543266 | 6.320123056 |
| GO_POSITIVE_REGULATION_OF_METANEPHROS_DEVELOPMENT                                 | 0.102409509  | 0.032573886  | 5.007013526  | 8.43E-07 | 0.004187462 | 5.367043211 |
| GO_CARDIAC_MUSCLE_FIBER_DEVELOPMENT                                               | 0.102500897  | 0.03986342   | 5.326962252  | 1.70E-07 | 0.000855273 | 6.884847343 |
| GO_REGULATION_OF_PEPTIDYL_SERINE_PHOSPHORYLATION_OF_STAT_PROTEIN                  | 0.102813428  | 0.090215084  | 6.467267177  | 3.03E-10 | 1.54E-06    | 12.93373376 |
| GO_REGULATION_OF_ODONTOGENESIS                                                    | 0.103807903  | 0.042980761  | 6.081136585  | 2.87E-09 | 1.46E-05    | 10.7771694  |
| GO_LOW_DENSITY_LIPOPROTEIN_PARTICLE_REMODELING                                    | 0.103867401  | 0.045352428  | 5.660375333  | 2.95E-08 | 0.000149443 | 8.552141979 |
| GO_DORSAL_SPINAL_CORD_DEVELOPMENT                                                 | 0.103986002  | 0.065198684  | 6.541148087  | 1.94E-10 | 9.92E-07    | 13.35852136 |
| GO_NEGATIVE_REGULATION_OF_CATECHOLAMINE_SECRETION                                 | 0.104914251  | 0.055963979  | 5.792375749  | 1.44E-08 | 7.32E-05    | 9.23584785  |
| GO_CORTISOL_METABOLIC_PROCESS                                                     | 0.106771751  | 0.032653243  | 5.232437973  | 2.75E-07 | 0.001378635 | 6.427959849 |
| GO_BRONCHUS_DEVELOPMENT                                                           | 0.10788513   | -0.010850037 | 5.235053289  | 2.72E-07 | 0.00136135  | 6.440506099 |
| GO_NEPHRIC_DUCT_MORPHOGENESIS                                                     | 0.11038579   | 0.042808721  | 5.478848585  | 7.74E-08 | 0.000390507 | 7.633689609 |
| GO_MIDGUT_DEVELOPMENT                                                             | 0.110511499  | 0.028619974  | 5.84456184   | 1.08E-08 | 5.50E-05    | 9.509788035 |
| GO_MORPHOGENESIS_OF_AN_EPITHELIAL_BUD                                             | 0.110999177  | 0.042916078  | 5.990626079  | 4.80E-09 | 2.44E-05    | 10.28737462 |
| GO_DENTATE_GYRUS_DEVELOPMENT                                                      | 0.111534654  | 0.031634957  | 5.996884862  | 4.63E-09 | 2.36E-05    | 10.32104888 |
| GO_TELENCEPHALON_REGIONALIZATION                                                  | 0.115532191  | 0.046252146  | 6.574561732  | 1.59E-10 | 8.11E-07    | 13.55189885 |
| GO_ONE_CARBON_COMPOUND_TRANSPORT                                                  | 0.115546873  | 0.076145005  | 5.747039656  | 1.85E-08 | 9.37E-05    | 8.999534595 |
| GO_BLOOD_VESSEL_ENDOTHELIAL_CELL_PROLIFERATION_INVOLVED_IN_SPROUTING_ANGIOGENESIS | 0.11602188   | 0.0230812    | 6.36557289   | 5.53E-10 | 2.82E-06    | 12.35535692 |
| GO_XENOBIOTIC_GLUCURONIDATION                                                     | 0.118023159  | 0.132624817  | 5.227096067  | 2.83E-07 | 0.001415767 | 6.402350392 |
| GO_GLIAL_CELL_DERIVED_NEUROTROPHIC_FACTOR_RECEPTOR_SIGNALING_PATHWAY              | 0.118679809  | 0.050466097  | 5.160074576  | 3.96E-07 | 0.001979109 | 6.082970835 |
| GO_PROSTATIC_BUD_FORMATION                                                        | 0.129866014  | 0.041271312  | 6.58283472   | 1.51E-10 | 7.72E-07    | 13.59989866 |
| GO_SPINAL_CORD_ASSOCIATION_NEURON_D                                               | 0.130113242  | 0.069252834  | 7.4841453    | 4.93E-13 | 2.52E-09    | 19.10731263 |

## DIFFERENTIATION

|                                                  |             |             |             |          |          |             |
|--------------------------------------------------|-------------|-------------|-------------|----------|----------|-------------|
| GO_POSITIVE_REGULATION_OF_GLOMERULUS_DEVELOPMENT | 0.136860124 | 0.054347875 | 6.716428829 | 6.69E-11 | 3.42E-07 | 14.38161376 |
| GO_REGULATION_OF_GLOMERULUS_DEVELOPMENT          | 0.138411023 | 0.053794675 | 7.79208649  | 6.18E-14 | 3.16E-10 | 21.10972348 |
| GO_POSITIVE_REGULATION_OF_ODONTOGENESIS          | 0.139646915 | 0.053049749 | 6.790306429 | 4.24E-11 | 2.17E-07 | 14.81920299 |
| GO_LATERAL_SPROUTING_FROM_AN_EPITHELIUM          | 0.139890558 | 0.027205585 | 7.147170463 | 4.46E-12 | 2.28E-08 | 16.98507666 |

## Supplementary Table S4 KEGG enrichment analysis results

| id                                             | logFC        | AveExpr      | t            | P.Value     | adj. P.Val  | B           |
|------------------------------------------------|--------------|--------------|--------------|-------------|-------------|-------------|
| KEGG_GLYOXYLATE_AND_DICARBOXYLATE_METABOLISM   | -0.128589015 | -0.020060066 | -5.840638077 | 1.10E-08    | 2.03E-06    | 9.519413878 |
| KEGG_CITRATE_CYCLE_TCA_CYCLE                   | -0.138283469 | -0.032165098 | -5.332384132 | 1.65E-07    | 3.01E-05    | 6.954618257 |
| KEGG_PROPANOATE_METABOLISM                     | -0.115510971 | -0.03739471  | -4.687022439 | 3.85E-06    | 0.000665519 | 3.990010077 |
| KEGG_VALINE_LEUCINE_AND_ISOLEUCINE_DEGRADATION | -0.119135849 | -0.031091791 | -4.628306255 | 5.04E-06    | 0.000866715 | 3.737036027 |
| KEGG_OXIDATIVE_PHOSPHORYLATION                 | -0.119083899 | -0.040444237 | -4.208508813 | 3.20E-05    | 0.005342209 | 2.012053273 |
| KEGG_PARKINSONS_DISEASE                        | -0.105481632 | -0.038819437 | -3.903820141 | 0.000111689 | 0.017535197 | 0.853679562 |



Supplementary Table S5 922 differentially expressed genes screened from the normal group and papillary thyroid carcinoma group

| id              |                |          | logFC        | AveExpr     | t            | P.Value  | adj. P. Val | B           |
|-----------------|----------------|----------|--------------|-------------|--------------|----------|-------------|-------------|
| ENSG00000074706 | protein_coding | IPCEF1   | -3.084684625 | 1.397011041 | -26.31765297 | 2.23E-92 | 1.57E-88    | 199.9933427 |
| ENSG00000163898 | protein_coding | LIPH     | 3.738893512  | 3.57703236  | 25.58281865  | 4.23E-89 | 1.99E-85    | 192.4923863 |
| ENSG00000253250 | protein_coding | C8orf88  | -1.700115374 | 1.017092687 | -24.49605489 | 3.21E-84 | 1.13E-80    | 181.3197157 |
| ENSG00000170439 | protein_coding | METTL7B  | 3.664656859  | 4.805062478 | 24.46976703  | 4.22E-84 | 1.19E-80    | 181.0483963 |
| ENSG00000153246 | protein_coding | PLA2R1   | -2.885897135 | 1.850887827 | -24.39689538 | 9.00E-84 | 2.11E-80    | 180.296038  |
| ENSG00000062038 | protein_coding | CDH3     | 3.235635688  | 3.831345823 | 23.65535313  | 2.03E-80 | 4.08E-77    | 172.6209139 |
| ENSG00000138722 | protein_coding | MMRN1    | -2.355518443 | 1.103925244 | -23.63890292 | 2.40E-80 | 4.24E-77    | 172.4502816 |
| ENSG00000175832 | protein_coding | ETV4     | 2.745327106  | 3.424642013 | 23.59145724  | 3.95E-80 | 6.18E-77    | 171.9580605 |
| ENSG00000117308 | protein_coding | GALE     | 2.595770823  | 3.89961232  | 23.55721418  | 5.64E-80 | 7.95E-77    | 171.6027326 |
| ENSG00000150625 | protein_coding | GPM6A    | -1.743647917 | 0.768021125 | -23.40933634 | 2.64E-79 | 3.38E-76    | 170.0675401 |
| ENSG00000130226 | protein_coding | DPP6     | -2.374854031 | 0.791828838 | -23.18159936 | 2.85E-78 | 3.35E-75    | 167.7011076 |
| ENSG00000147257 | protein_coding | GPC3     | -2.244920344 | 0.946990452 | -23.13353064 | 4.72E-78 | 5.11E-75    | 167.2012992 |
| ENSG00000138356 | protein_coding | AOX1     | -2.097828916 | 0.854724686 | -22.72955219 | 3.23E-76 | 3.26E-73    | 162.9967312 |
| ENSG00000133800 | protein_coding | LYVE1    | -2.172909875 | 1.156216842 | -22.50414977 | 3.43E-75 | 3.22E-72    | 160.6478785 |
| ENSG00000174567 | protein_coding | GOLT1A   | 2.679184395  | 3.041107014 | 22.48745968  | 4.09E-75 | 3.60E-72    | 160.4738819 |
| ENSG00000166352 | protein_coding | C11orf74 | -2.090190735 | 3.186126831 | -22.43117097 | 7.37E-75 | 6.11E-72    | 159.8869919 |
| ENSG00000137142 | protein_coding | IGFBPL1  | -2.625459437 | 1.199781602 | -22.13715298 | 1.61E-73 | 1.26E-70    | 156.819764  |
| ENSG00000196616 | protein_coding | ADH1B    | -1.893666338 | 0.651546462 | -22.11299893 | 2.08E-73 | 1.54E-70    | 156.567671  |
| ENSG00000143171 | protein_coding | RXRG     | 4.149273252  | 4.258675463 | 21.81858359  | 4.57E-72 | 3.06E-69    | 153.4936784 |
| ENSG00000105717 | protein_coding | PBX4     | -1.957787033 | 1.543907274 | -21.65959531 | 2.43E-71 | 1.55E-68    | 151.8328666 |
| ENSG00000170153 | protein_coding | RNF150   | -1.540965166 | 0.919231217 | -21.65311605 | 2.60E-71 | 1.59E-68    | 151.765173  |
| ENSG00000184574 | protein_coding | LPAR5    | 2.840607221  | 3.854631593 | 21.59952369  | 4.56E-71 | 2.68E-68    | 151.205226  |
| ENSG00000171612 | protein_coding | SLC25A33 | -1.185737473 | 1.291856246 | -21.51829297 | 1.07E-70 | 6.03E-68    | 150.3564146 |
| ENSG00000168528 | protein_coding | SERINC2  | 1.734611712  | 5.265440329 | 21.49223845  | 1.41E-70 | 7.63E-68    | 150.0841391 |
| ENSG00000149573 | protein_coding | MPZL2    | 2.313334248  | 5.567254658 | 21.45243878  | 2.14E-70 | 1.12E-67    | 149.6682047 |
| ENSG00000072682 | protein_coding | P4HA2    | 1.606351684  | 3.284893161 | 21.32211563  | 8.41E-70 | 4.23E-67    | 148.306092  |
| ENSG00000119655 | protein_coding | NPC2     | 2.466613634  | 9.162952137 | 21.20925225  | 2.75E-69 | 1.34E-66    | 147.1263161 |
| ENSG00000157111 | protein_coding | TMEM171  | -2.498385811 | 2.378170379 | -21.16205728 | 4.52E-69 | 2.12E-66    | 146.632948  |
| ENSG00000159842 | protein_coding | ABR      | 1.290797225  | 3.30658457  | 21.08687867  | 9.97E-69 | 4.53E-66    | 145.8470121 |
| ENSG00000226124 | protein_coding | FTCDNL1  | -1.186955235 | 1.125040874 | -21.03236533 | 1.77E-68 | 7.67E-66    | 145.2770967 |
| ENSG00000198682 | protein_coding | PAPSS2   | -2.30494991  | 1.933863388 | -21.03088132 | 1.80E-68 | 7.67E-66    | 145.2615818 |
| ENSG00000104723 | protein_coding | TUSC3    | 2.489511254  | 3.49597893  | 20.96074203  | 3.75E-68 | 1.56E-65    | 144.5282859 |
| ENSG00000154928 | protein_coding | EPHB1    | -1.598399619 | 1.140373781 | -20.91563214 | 6.03E-68 | 2.43E-65    | 144.0566621 |
| ENSG00000115112 | protein_coding | TFCP2L1  | -3.134931806 | 1.720991658 | -20.90933832 | 6.44E-68 | 2.52E-65    | 143.9908599 |
| ENSG00000066382 | protein_coding | MPPED2   | -2.342391966 | 1.139701522 | -20.79923078 | 2.05E-67 | 7.81E-65    | 142.8396797 |
| ENSG00000117707 | protein_coding | PROX1    | -1.516241305 | 0.981746219 | -20.7765497  | 2.60E-67 | 9.65E-65    | 142.602549  |
| ENSG00000168487 | protein_coding | BMP1     | 1.316461156  | 3.603292206 | 20.74919761  | 3.47E-67 | 1.25E-64    | 142.3165845 |
| ENSG00000117298 | protein_coding | ECE1     | 1.554573602  | 6.181557823 | 20.59752073  | 1.71E-66 | 6.02E-64    | 140.7308636 |
| ENSG00000171368 | protein_coding | TPPP     | -1.915771883 | 1.576060675 | -20.54165765 | 3.07E-66 | 1.06E-63    | 140.1468711 |
| ENSG00000166589 | protein_coding | CDH16    | -3.826850626 | 1.694558044 | -20.38871536 | 1.53E-65 | 5.02E-63    | 138.5481537 |
| ENSG00000072133 | protein_coding | RPS6KA6  | -1.266230677 | 1.30437933  | -20.34382907 | 2.46E-65 | 7.87E-63    | 138.0790028 |
| ENSG00000134569 | protein_coding | LRP4     | 3.366910254  | 4.047783882 | 20.1849968   | 1.30E-64 | 4.08E-62    | 136.4191178 |
| ENSG00000183248 | protein_coding | PRR36    | 1.909571386  | 2.285138057 | 20.14302053  | 2.03E-64 | 6.07E-62    | 135.9805112 |
| ENSG00000114805 | protein_coding | PLCH1    | -1.582263355 | 0.882453383 | -20.11522848 | 2.71E-64 | 7.96E-62    | 135.6901321 |
| ENSG00000162873 | protein_coding | KLHDC8A  | 3.058549036  | 3.086631078 | 20.0026779   | 8.85E-64 | 2.54E-61    | 134.5143293 |
| ENSG00000158352 | protein_coding | SHROOM4  | 1.976803325  | 2.748081239 | 19.97059428  | 1.24E-63 | 3.49E-61    | 134.1792053 |
| ENSG00000157680 | protein_coding | DGKI     | -2.20541711  | 1.123961786 | -19.9447631  | 1.63E-63 | 4.49E-61    | 133.9094074 |
| ENSG00000204381 | protein_coding | LAYN     | -1.778018878 | 1.935968336 | -19.84957785 | 4.41E-63 | 1.20E-60    | 132.9153704 |
| ENSG00000259803 | protein_coding | SLC22A31 | 3.902199861  | 3.576487904 | 19.84518896  | 4.62E-63 | 1.23E-60    | 132.8695421 |
| ENSG00000110092 | protein_coding | CCND1    | 1.721221208  | 6.491816353 | 19.78786209  | 8.44E-63 | 2.20E-60    | 132.2709881 |
| ENSG00000102543 | protein_coding | CDADC1   | -1.041219491 | 1.906495092 | -19.71856208 | 1.75E-62 | 4.47E-60    | 131.5475459 |
| ENSG00000186153 | protein_coding | WWOX     | -1.152451637 | 2.242019391 | -19.70716114 | 1.97E-62 | 4.95E-60    | 131.4285419 |
| ENSG00000144749 | protein_coding | LRIG1    | -1.490825537 | 2.660717206 | -19.64545656 | 3.76E-62 | 9.30E-60    | 130.784534  |
| ENSG00000184489 | protein_coding | PTP4A3   | 1.806306675  | 3.997976946 | 19.60628161  | 5.67E-62 | 1.38E-59    | 130.3757302 |
| ENSG00000174307 | protein_coding | PHLDA3   | 1.802553026  | 4.44516833  | 19.58861554  | 6.83E-62 | 1.63E-59    | 130.1913953 |
| ENSG00000152990 | protein_coding | GPR125   | -1.468878177 | 2.258302148 | -19.54248267 | 1.11E-61 | 2.60E-59    | 129.7100769 |
| ENSG0000015475  | protein_coding | BID      | 1.624696002  | 3.026784037 | 19.54090441  | 1.13E-61 | 2.60E-59    | 129.6936118 |
| ENSG00000169946 | protein_coding | ZFPM2    | -1.299728173 | 0.929115192 | -19.50513562 | 1.64E-61 | 3.73E-59    | 129.3204784 |
| ENSG00000076555 | protein_coding | ACACB    | -1.306114605 | 1.551376257 | -19.43004737 | 3.60E-61 | 7.81E-59    | 128.5373246 |
| ENSG00000168079 | protein_coding | SCARA5   | -2.049220388 | 0.751039578 | -19.41289793 | 4.31E-61 | 9.21E-59    | 128.3584897 |
| ENSG00000141524 | protein_coding | TMC6     | 1.99673764   | 3.361214705 | 19.34903582  | 8.42E-61 | 1.77E-58    | 127.6926359 |
| ENSG00000169302 | protein_coding | STK32A   | 2.068896894  | 2.922373641 | 19.32774472  | 1.05E-60 | 2.18E-58    | 127.4706824 |
| ENSG00000075035 | protein_coding | WSCD2    | -3.09859708  | 1.286667155 | -19.32430296 | 1.09E-60 | 2.23E-58    | 127.4348049 |
| ENSG00000160180 | protein_coding | TFF3     | -6.094906405 | 4.072174908 | -19.2950223  | 1.48E-60 | 2.94E-58    | 127.1295977 |
| ENSG00000161714 | protein_coding | PLCD3    | 2.770028639  | 3.960346446 | 19.29167159  | 1.54E-60 | 3.01E-58    | 127.0946738 |
| ENSG00000132561 | protein_coding | MATN2    | -2.890604428 | 4.147023284 | -19.23307175 | 2.84E-60 | 5.41E-58    | 126.4839767 |
| ENSG00000141858 | protein_coding | SAMD1    | 1.091088204  | 4.216584396 | 19.22110647  | 3.22E-60 | 6.05E-58    | 126.3592993 |
| ENSG00000187583 | protein_coding | PLEKHN1  | 1.685577971  | 1.771694753 | 19.21566188  | 3.41E-60 | 6.32E-58    | 126.3025693 |
| ENSG00000109819 | protein_coding | PPARGC1A | -2.071277337 | 1.34219319  | -19.19410643 | 4.27E-60 | 7.81E-58    | 126.0779845 |
| ENSG00000132481 | protein_coding | TRIM47   | 1.450454774  | 3.633368314 | 19.1898448   | 4.46E-60 | 8.07E-58    | 126.0335854 |

|                 |                |            |              |             |              |          |          |             |
|-----------------|----------------|------------|--------------|-------------|--------------|----------|----------|-------------|
| ENSG00000113594 | protein_coding | LIFR       | -2.123890734 | 1.877312733 | -19.15730295 | 6.28E-60 | 1.12E-57 | 125.6945806 |
| ENSG00000197635 | protein_coding | DPP4       | 3.654126205  | 4.279725734 | 19.13188141  | 8.19E-60 | 1.43E-57 | 125.4297862 |
| ENSG00000136111 | protein_coding | TBC1D4     | -1.925639737 | 2.588531546 | -19.1142778  | 9.85E-60 | 1.69E-57 | 125.2464424 |
| ENSG00000105327 | protein_coding | BBC3       | 1.486374648  | 2.394048553 | 19.09763232  | 1.17E-59 | 1.99E-57 | 125.0730912 |
| ENSG00000115828 | protein_coding | QPCT       | 2.96334019   | 4.421997838 | 19.07085325  | 1.55E-59 | 2.60E-57 | 124.7942341 |
| ENSG00000184908 | protein_coding | CLCNKB     | -2.147295844 | 1.522398833 | -19.02975502 | 2.39E-59 | 3.96E-57 | 124.3663373 |
| ENSG00000091129 | protein_coding | NRCAM      | 1.782826719  | 2.925170642 | 19.01705665  | 2.73E-59 | 4.43E-57 | 124.2341445 |
| ENSG00000256870 | protein_coding | SLC5A8     | -3.296950747 | 1.663713735 | -19.016646   | 2.74E-59 | 4.43E-57 | 124.2298696 |
| ENSG00000109586 | protein_coding | GALNT7     | 1.877822178  | 3.726568551 | 18.94570133  | 5.75E-59 | 9.21E-57 | 123.4914754 |
| ENSG00000135824 | protein_coding | RGS8       | -1.900491359 | 0.592983335 | -18.80832701 | 2.42E-58 | 3.83E-56 | 122.0624521 |
| ENSG00000066248 | protein_coding | NGEF       | 2.88916274   | 2.803653381 | 18.8033139   | 2.55E-58 | 3.95E-56 | 122.0103239 |
| ENSG00000044524 | protein_coding | EPHA3      | -1.632047722 | 1.398051038 | -18.79551835 | 2.77E-58 | 4.24E-56 | 121.9292654 |
| ENSG00000080493 | protein_coding | SLC4A4     | -2.72176588  | 1.608189288 | -18.79264897 | 2.85E-58 | 4.32E-56 | 121.8994305 |
| ENSG00000163431 | protein_coding | LMOD1      | -2.551645857 | 2.767342404 | -18.7325926  | 5.34E-58 | 8.01E-56 | 121.2750921 |
| ENSG00000101236 | protein_coding | RNF24      | 1.059059979  | 3.070883187 | 18.71339032  | 6.53E-58 | 9.68E-56 | 121.0755131 |
| ENSG00000166145 | protein_coding | SPINT1     | 1.585632473  | 6.054492432 | 18.69349841  | 8.03E-58 | 1.18E-55 | 120.86879   |
| ENSG00000277363 | protein_coding | SRCIN1     | 1.29227267   | 1.384617492 | 18.66752064  | 1.05E-57 | 1.53E-55 | 120.5988573 |
| ENSG00000147408 | protein_coding | CSGALNACT1 | -2.119231729 | 3.270314482 | -18.66063528 | 1.13E-57 | 1.63E-55 | 120.5273192 |
| ENSG00000143196 | protein_coding | DPT        | -3.843450136 | 2.209699547 | -18.64595931 | 1.32E-57 | 1.88E-55 | 120.3748473 |
| ENSG00000115042 | protein_coding | FAHD2A     | -1.113009942 | 2.290393387 | -18.63757143 | 1.44E-57 | 2.03E-55 | 120.2877099 |
| ENSG00000116761 | protein_coding | CTH        | -1.230897284 | 1.380628632 | -18.58596117 | 2.47E-57 | 3.45E-55 | 119.7516556 |
| ENSG00000166415 | protein_coding | WDR72      | -2.342955037 | 2.365205358 | -18.57286744 | 2.83E-57 | 3.91E-55 | 119.6156837 |
| ENSG00000205038 | protein_coding | PKHD1L1    | -3.256998395 | 1.395373585 | -18.55864621 | 3.29E-57 | 4.50E-55 | 119.4680161 |
| ENSG00000172667 | protein_coding | ZMAT3      | 1.474646637  | 3.277261698 | 18.54626529  | 3.74E-57 | 5.02E-55 | 119.3394684 |
| ENSG00000153993 | protein_coding | SEMA3D     | -2.94191577  | 1.1779692   | -18.52161836 | 4.84E-57 | 6.42E-55 | 119.0835962 |
| ENSG00000143217 | protein_coding | PVRL4      | 2.755126638  | 2.814257936 | 18.52087865  | 4.87E-57 | 6.42E-55 | 119.0759175 |
| ENSG00000176532 | protein_coding | PRR15      | 4.550311889  | 4.693532487 | 18.49745654  | 6.22E-57 | 8.12E-55 | 118.8327996 |
| ENSG00000174460 | protein_coding | ZCCHC12    | 5.591271538  | 6.082371583 | 18.47717169  | 7.69E-57 | 9.94E-55 | 118.6222761 |
| ENSG00000004399 | protein_coding | PLXND1     | 1.402572743  | 4.128797225 | 18.47256176  | 8.07E-57 | 1.03E-54 | 118.5744365 |
| ENSG00000163485 | protein_coding | ADORA1     | 2.058272713  | 3.119656721 | 18.4702421   | 8.27E-57 | 1.05E-54 | 118.5503648 |
| ENSG00000101938 | protein_coding | CHRD1      | -2.794301208 | 1.433010883 | -18.31961452 | 3.98E-56 | 5.00E-54 | 116.9880721 |
| ENSG00000165061 | protein_coding | ZMAT4      | -2.425996168 | 0.934114824 | -18.31398748 | 4.22E-56 | 5.26E-54 | 116.9297407 |
| ENSG00000132535 | protein_coding | DLG4       | 1.17779251   | 2.727830768 | 18.30316594  | 4.72E-56 | 5.83E-54 | 116.8175685 |
| ENSG00000112232 | protein_coding | KHDRBS2    | -1.952671176 | 1.21199516  | -18.25802167 | 7.56E-56 | 9.10E-54 | 116.3497136 |
| ENSG00000109182 | protein_coding | CWH43      | -2.415134245 | 1.155574395 | -18.21408967 | 1.19E-55 | 1.43E-53 | 115.8945707 |
| ENSG00000142733 | protein_coding | MAP3K6     | 1.221418809  | 3.314389741 | 18.19048483  | 1.53E-55 | 1.81E-53 | 115.6500821 |
| ENSG00000145864 | protein_coding | GABRB2     | 3.170888236  | 2.849726958 | 18.18103651  | 1.68E-55 | 1.98E-53 | 115.5522327 |
| ENSG00000131018 | protein_coding | SYNE1      | -1.582923314 | 1.51303958  | -18.17214246 | 1.85E-55 | 2.15E-53 | 115.46013   |
| ENSG00000188910 | protein_coding | GJB3       | 2.614477886  | 2.594755689 | 18.1332739   | 2.77E-55 | 3.20E-53 | 115.0576982 |
| ENSG00000134548 | protein_coding | SPX        | -2.41189195  | 1.472020056 | -18.11661715 | 3.29E-55 | 3.77E-53 | 114.8852769 |
| ENSG00000163235 | protein_coding | TGFA       | 2.121888967  | 3.948681021 | 18.08231286  | 4.71E-55 | 5.35E-53 | 114.530249  |
| ENSG00000134574 | protein_coding | DDB2       | 1.073775986  | 2.766074339 | 18.05506048  | 6.25E-55 | 7.05E-53 | 114.2482726 |
| ENSG00000163347 | protein_coding | CLDN1      | 3.477833316  | 6.24141517  | 18.05190075  | 6.46E-55 | 7.22E-53 | 114.2155834 |
| ENSG00000082482 | protein_coding | KCNK2      | -1.926343768 | 1.151978669 | -18.0203941  | 8.96E-55 | 9.95E-53 | 113.889674  |
| ENSG00000197249 | protein_coding | SERPINA1   | 4.413290269  | 7.590672396 | 17.9640915   | 1.61E-54 | 1.77E-52 | 113.3074805 |
| ENSG00000184500 | protein_coding | PROS1      | 3.127839976  | 5.460689491 | 17.95550134  | 1.76E-54 | 1.91E-52 | 113.2186783 |
| ENSG00000006534 | protein_coding | ALDH3B1    | 1.833552952  | 2.652841107 | 17.9455621   | 1.95E-54 | 2.10E-52 | 113.1159377 |
| ENSG00000244405 | protein_coding | ETV5       | 1.523611848  | 3.793126243 | 17.92304     | 2.47E-54 | 2.63E-52 | 112.8831619 |
| ENSG00000135205 | protein_coding | CCDC146    | -1.579764979 | 1.724650341 | -17.89595356 | 3.27E-54 | 3.46E-52 | 112.6032704 |
| ENSG00000156966 | protein_coding | B3GNT7     | 1.694965519  | 2.472328364 | 17.87495929  | 4.06E-54 | 4.27E-52 | 112.3863757 |
| ENSG00000196781 | protein_coding | TLE1       | -1.261004329 | 2.239248869 | -17.85374089 | 5.07E-54 | 5.29E-52 | 112.1672055 |
| ENSG00000006625 | protein_coding | GGCT       | 2.00062569   | 5.309043042 | 17.84050354  | 5.81E-54 | 6.02E-52 | 112.0304941 |
| ENSG00000114698 | protein_coding | PLSCR4     | -1.451679358 | 2.66383371  | -17.824407   | 6.87E-54 | 7.07E-52 | 111.8642752 |
| ENSG00000250305 | protein_coding | KIAA1456   | -1.544861328 | 1.944990277 | -17.81748178 | 7.38E-54 | 7.54E-52 | 111.7927701 |
| ENSG00000136155 | protein_coding | SCEL       | 3.068273503  | 3.598768994 | 17.79236878  | 9.58E-54 | 9.71E-52 | 111.5335071 |
| ENSG00000174839 | protein_coding | DENND6A    | -1.034019107 | 2.603402496 | -17.78775968 | 1.01E-53 | 1.01E-51 | 111.4859298 |
| ENSG00000142765 | protein_coding | SYTL1      | 1.689659473  | 3.474985468 | 17.70255706  | 2.43E-53 | 2.41E-51 | 110.6067849 |
| ENSG00000138185 | protein_coding | ENTPD1     | 1.952679032  | 3.771246313 | 17.68120296  | 3.04E-53 | 2.99E-51 | 110.3865552 |
| ENSG00000108846 | protein_coding | ABCC3      | 2.06493725   | 3.090173272 | 17.67909414  | 3.10E-53 | 3.04E-51 | 110.3648088 |
| ENSG00000151948 | protein_coding | GLT1D1     | 1.61452055   | 2.070758117 | 17.66072227  | 3.75E-53 | 3.65E-51 | 110.1753744 |
| ENSG00000105329 | protein_coding | TGFB1      | 1.541339727  | 4.354770005 | 17.64875469  | 4.25E-53 | 4.10E-51 | 110.051993  |
| ENSG00000173715 | protein_coding | C11orf80   | 1.193289205  | 2.367812759 | 17.64532109  | 4.40E-53 | 4.22E-51 | 110.0165964 |
| ENSG00000159166 | protein_coding | LAD1       | 2.090423759  | 3.676749701 | 17.64376893  | 4.48E-53 | 4.26E-51 | 110.0005958 |
| ENSG00000151491 | protein_coding | EPS8       | 1.747035149  | 4.24779408  | 17.64100426  | 4.61E-53 | 4.36E-51 | 109.9720964 |
| ENSG00000197557 | protein_coding | TTC30A     | -1.03193941  | 1.473570751 | -17.63864153 | 4.72E-53 | 4.43E-51 | 109.947741  |
| ENSG00000065675 | protein_coding | PRKCQ      | -1.34356335  | 2.820068277 | -17.62428059 | 5.48E-53 | 5.11E-51 | 109.7997176 |
| ENSG00000141738 | protein_coding | GRB7       | 1.846532018  | 3.339894688 | 17.57324652  | 9.29E-53 | 8.62E-51 | 109.2738564 |
| ENSG00000187824 | protein_coding | TMEM220    | -1.228096073 | 1.834451801 | -17.55267978 | 1.15E-52 | 1.06E-50 | 109.062008  |
| ENSG00000166148 | protein_coding | AVPR1A     | -1.766303155 | 1.042507421 | -17.53237152 | 1.42E-52 | 1.30E-50 | 108.8528639 |
| ENSG00000162105 | protein_coding | SHANK2     | -1.160073721 | 0.913357053 | -17.50733518 | 1.84E-52 | 1.66E-50 | 108.5950859 |
| ENSG00000154553 | protein_coding | PDLIM3     | -1.749970895 | 1.329853857 | -17.48194781 | 2.39E-52 | 2.12E-50 | 108.3337595 |
| ENSG00000124145 | protein_coding | SDC4       | 2.410223321  | 8.145908763 | 17.47495341  | 2.57E-52 | 2.26E-50 | 108.2617739 |
| ENSG00000034971 | protein_coding | MYOC       | -2.23608013  | 0.798070286 | -17.46983997 | 2.71E-52 | 2.37E-50 | 108.2091503 |

|                 |                |           |              |             |              |          |          |             |
|-----------------|----------------|-----------|--------------|-------------|--------------|----------|----------|-------------|
| ENSG00000104044 | protein_coding | OCA2      | -1.870275316 | 0.873597418 | -17.42265956 | 4.42E-52 | 3.84E-50 | 107.7237341 |
| ENSG00000244694 | protein_coding | PTCHD4    | 1.734666192  | 1.981263345 | 17.40394758  | 5.36E-52 | 4.63E-50 | 107.5312809 |
| ENSG00000139318 | protein_coding | DUSP6     | 2.39808948   | 6.204820848 | 17.36490452  | 8.03E-52 | 6.90E-50 | 107.1298428 |
| ENSG00000266524 | protein_coding | GDF10     | -1.841112972 | 0.785860833 | -17.35731349 | 8.68E-52 | 7.41E-50 | 107.0518114 |
| ENSG00000172817 | protein_coding | CYP7B1    | -1.2680093   | 1.320804734 | -17.33570983 | 1.09E-51 | 9.16E-50 | 106.8297728 |
| ENSG00000155849 | protein_coding | ELMO1     | -2.269179571 | 2.25569127  | -17.32603162 | 1.20E-51 | 1.01E-49 | 106.7303183 |
| ENSG00000115414 | protein_coding | FN1       | 5.179319781  | 8.287570071 | 17.31519544  | 1.34E-51 | 1.12E-49 | 106.6189767 |
| ENSG00000107731 | protein_coding | UNC5B     | 1.680923751  | 3.014567132 | 17.29355877  | 1.68E-51 | 1.38E-49 | 106.3966989 |
| ENSG0000013364  | protein_coding | MVP       | 1.497766457  | 5.334081727 | 17.2919522   | 1.71E-51 | 1.40E-49 | 106.3801963 |
| ENSG00000132970 | protein_coding | WASF3     | -1.586402376 | 2.200992861 | -17.29003738 | 1.74E-51 | 1.42E-49 | 106.3605278 |
| ENSG00000100302 | protein_coding | RASD2     | 2.044941119  | 2.615986382 | 17.28345428  | 1.86E-51 | 1.51E-49 | 106.2929112 |
| ENSG00000196878 | protein_coding | LAMB3     | 3.639906952  | 4.509687433 | 17.28236621  | 1.88E-51 | 1.52E-49 | 106.2817359 |
| ENSG00000146267 | protein_coding | FAXC      | 1.057196238  | 1.136444289 | 17.25911177  | 2.39E-51 | 1.92E-49 | 106.0429255 |
| ENSG00000171791 | protein_coding | BCL2      | -1.823503895 | 3.067771555 | -17.25082659 | 2.61E-51 | 2.08E-49 | 105.9578558 |
| ENSG00000120875 | protein_coding | DUSP4     | 1.778086742  | 2.672282521 | 17.24411755  | 2.80E-51 | 2.21E-49 | 105.8889751 |
| ENSG00000112562 | protein_coding | SMOC2     | -2.719304127 | 2.846005279 | -17.24348357 | 2.81E-51 | 2.22E-49 | 105.8824665 |
| ENSG0000011028  | protein_coding | MRC2      | 2.666974025  | 4.489504362 | 17.24235564  | 2.85E-51 | 2.23E-49 | 105.8708867 |
| ENSG00000204103 | protein_coding | MAFB      | -1.926873358 | 3.915024728 | -17.23867555 | 2.96E-51 | 2.30E-49 | 105.8331067 |
| ENSG00000120820 | protein_coding | GLT8D2    | -2.138414377 | 2.008803744 | -17.12855455 | 9.21E-51 | 7.09E-49 | 104.7033164 |
| ENSG00000120254 | protein_coding | MTHFD1L   | 1.047337257  | 2.743959269 | 17.10430672  | 1.18E-50 | 9.06E-49 | 104.4547345 |
| ENSG00000130513 | protein_coding | GDF15     | 3.525200985  | 4.646980133 | 17.08684366  | 1.42E-50 | 1.08E-48 | 104.2757513 |
| ENSG00000105641 | protein_coding | SLC5A5    | -3.00720374  | 0.990175473 | -17.07705475 | 1.57E-50 | 1.19E-48 | 104.1754382 |
| ENSG00000154556 | protein_coding | SORBS2    | -2.292665396 | 2.913293494 | -17.06577496 | 1.76E-50 | 1.32E-48 | 104.0598613 |
| ENSG00000178053 | protein_coding | MLF1      | -1.059231056 | 2.087086548 | -17.03196385 | 2.49E-50 | 1.86E-48 | 103.7135119 |
| ENSG00000133121 | protein_coding | STARD13   | -1.363051793 | 2.248630472 | -17.02427727 | 2.70E-50 | 1.99E-48 | 103.6347925 |
| ENSG00000196218 | protein_coding | RYR1      | 1.372463929  | 1.572562441 | 17.00660294  | 3.24E-50 | 2.37E-48 | 103.4538144 |
| ENSG00000138639 | protein_coding | ARHGAP24  | -1.856528898 | 1.636529865 | -16.97559197 | 4.45E-50 | 3.25E-48 | 103.136367  |
| ENSG00000178531 | protein_coding | CTXN1     | 2.542805888  | 3.521644327 | 16.96368187  | 5.03E-50 | 3.66E-48 | 103.0144794 |
| ENSG00000106829 | protein_coding | TLE4      | -1.119724714 | 1.285595813 | -16.96064142 | 5.19E-50 | 3.75E-48 | 102.9833663 |
| ENSG00000135723 | protein_coding | FHOD1     | 1.23338896   | 3.558375256 | 16.95660101  | 5.41E-50 | 3.89E-48 | 102.9420223 |
| ENSG0000014914  | protein_coding | MTMR11    | 1.283894431  | 1.830124075 | 16.91796777  | 8.06E-50 | 5.76E-48 | 102.5468064 |
| ENSG00000110042 | protein_coding | DTX4      | 2.920743541  | 5.503297923 | 16.91694008  | 8.14E-50 | 5.79E-48 | 102.5362957 |
| ENSG00000163191 | protein_coding | S100A11   | 1.667297202  | 8.721611111 | 16.8998641   | 9.70E-50 | 6.87E-48 | 102.3616714 |
| ENSG00000103855 | protein_coding | CD276     | 1.016087572  | 3.715257832 | 16.86308432  | 1.42E-49 | 9.93E-48 | 101.9856753 |
| ENSG00000150995 | protein_coding | ITPR1     | -2.274163974 | 2.223718208 | -16.83222897 | 1.94E-49 | 1.36E-47 | 101.6703777 |
| ENSG00000140545 | protein_coding | MFGE8     | 2.06804922   | 5.038254625 | 16.80597449  | 2.55E-49 | 1.77E-47 | 101.4021913 |
| ENSG00000182580 | protein_coding | EPHB3     | 1.994078234  | 2.264120988 | 16.77303826  | 3.57E-49 | 2.46E-47 | 101.065879  |
| ENSG00000164761 | protein_coding | TNFRSF11B | -2.779231889 | 3.443756    | -16.72569126 | 5.81E-49 | 3.95E-47 | 100.5826687 |
| ENSG00000105711 | protein_coding | SCN1B     | 1.611693195  | 2.369925202 | 16.66892741  | 1.04E-48 | 7.01E-47 | 100.0037482 |
| ENSG00000064309 | protein_coding | CDON      | -1.828876414 | 1.677853107 | -16.64817372 | 1.29E-48 | 8.59E-47 | 99.79219544 |
| ENSG00000205403 | protein_coding | CFI       | 2.033543819  | 4.479090831 | 16.64516586  | 1.33E-48 | 8.82E-47 | 99.76153964 |
| ENSG00000214944 | protein_coding | ARHGEF28  | -1.182239241 | 1.183050176 | -16.58378225 | 2.49E-48 | 1.64E-46 | 99.13619795 |
| ENSG00000213977 | protein_coding | TAX1BP3   | 1.054035858  | 4.398690602 | 16.57707538  | 2.66E-48 | 1.75E-46 | 99.06790375 |
| ENSG00000157404 | protein_coding | KIT       | -2.736866623 | 2.129524972 | -16.57070728 | 2.84E-48 | 1.86E-46 | 99.00306514 |
| ENSG00000166450 | protein_coding | PRTG      | -1.207616121 | 1.160736103 | -16.56320827 | 3.07E-48 | 1.99E-46 | 98.92671894 |
| ENSG00000165886 | protein_coding | UBTD1     | 1.005314013  | 4.131139215 | 16.56155346  | 3.12E-48 | 2.02E-46 | 98.90987275 |
| ENSG00000154447 | protein_coding | SH3RF1    | -1.141124678 | 2.830070528 | -16.55563648 | 3.32E-48 | 2.14E-46 | 98.84963988 |
| ENSG00000105376 | protein_coding | ICAM5     | 2.053501446  | 2.189195335 | 16.51888586  | 4.83E-48 | 3.10E-46 | 98.47564216 |
| ENSG00000161013 | protein_coding | MGAT4B    | 1.095348832  | 4.960704406 | 16.50062576  | 5.83E-48 | 3.68E-46 | 98.28988708 |
| ENSG00000113924 | protein_coding | HGD       | -2.846869356 | 2.121355802 | -16.49136532 | 6.41E-48 | 4.03E-46 | 98.19570125 |
| ENSG00000102265 | protein_coding | TIMP1     | 2.973107921  | 8.197134164 | 16.47605654  | 7.49E-48 | 4.69E-46 | 98.04002631 |
| ENSG00000136205 | protein_coding | TNS3      | -1.415031647 | 3.137944178 | -16.47222269 | 7.79E-48 | 4.86E-46 | 98.00104514 |
| ENSG00000173467 | protein_coding | AGR3      | -1.601027884 | 0.667941665 | -16.44689374 | 1.01E-47 | 6.27E-46 | 97.74356336 |
| ENSG00000275832 | protein_coding | ARHGAP23  | 1.417764814  | 2.873032846 | 16.44458553  | 1.03E-47 | 6.39E-46 | 97.72010382 |
| ENSG00000005884 | protein_coding | ITGA3     | 1.631117212  | 6.239143479 | 16.43404746  | 1.15E-47 | 7.08E-46 | 97.61300987 |
| ENSG00000113946 | protein_coding | CLDN16    | 3.741525016  | 3.88610618  | 16.43348823  | 1.16E-47 | 7.09E-46 | 97.60732716 |
| ENSG00000188906 | protein_coding | LRRK2     | 2.821184299  | 3.650521029 | 16.41889507  | 1.34E-47 | 8.20E-46 | 97.459051   |
| ENSG00000180440 | protein_coding | SERTM1    | -1.677606326 | 0.680998142 | -16.41101948 | 1.46E-47 | 8.81E-46 | 97.37904273 |
| ENSG00000106789 | protein_coding | CORO2A    | 1.321619835  | 2.287369863 | 16.40466567  | 1.55E-47 | 9.36E-46 | 97.31450098 |
| ENSG00000188157 | protein_coding | AGRN      | 1.08657366   | 5.425627025 | 16.38945759  | 1.82E-47 | 1.08E-45 | 97.16004188 |
| ENSG00000183049 | protein_coding | CAMK1D    | -1.343790459 | 2.253818625 | -16.37730426 | 2.05E-47 | 1.22E-45 | 97.03663259 |
| ENSG00000183682 | protein_coding | BMP8A     | -2.930424662 | 1.376532097 | -16.37225163 | 2.16E-47 | 1.28E-45 | 96.98533281 |
| ENSG00000137460 | protein_coding | FHDC1     | -1.511750981 | 2.689463932 | -16.34961268 | 2.73E-47 | 1.59E-45 | 96.75552426 |
| ENSG00000197766 | protein_coding | CFD       | -2.269661689 | 3.200491258 | -16.33364662 | 3.21E-47 | 1.86E-45 | 96.59349844 |
| ENSG00000135547 | protein_coding | HEY2      | 1.586805292  | 2.766285165 | 16.32990143  | 3.33E-47 | 1.93E-45 | 96.55549725 |
| ENSG00000129654 | protein_coding | FOXJ1     | -1.87640983  | 0.913884899 | -16.32204447 | 3.61E-47 | 2.08E-45 | 96.47578224 |
| ENSG00000105976 | protein_coding | MET       | 2.438471087  | 5.716939309 | 16.31125277  | 4.03E-47 | 2.31E-45 | 96.36630705 |
| ENSG00000109113 | protein_coding | RAB34     | 1.069238767  | 5.461358011 | 16.29628123  | 4.70E-47 | 2.68E-45 | 96.21445916 |
| ENSG00000095383 | protein_coding | TBC1D2    | 1.802417475  | 4.447061223 | 16.26808092  | 6.26E-47 | 3.56E-45 | 95.92853184 |
| ENSG00000047648 | protein_coding | ARHGAP6   | -1.143461903 | 2.412904128 | -16.26258529 | 6.62E-47 | 3.75E-45 | 95.87282496 |
| ENSG00000166886 | protein_coding | NAB2      | 1.798666366  | 5.368578664 | 16.26086811  | 6.74E-47 | 3.80E-45 | 95.85541959 |
| ENSG00000143324 | protein_coding | XPR1      | 1.395786878  | 3.815239906 | 16.22495894  | 9.72E-47 | 5.41E-45 | 95.49154699 |
| ENSG00000155792 | protein_coding | DEPTOR    | -2.230069925 | 4.107632063 | -16.17144462 | 1.68E-46 | 9.12E-45 | 94.94965035 |

|                 |                |           |              |             |              |          |          |             |
|-----------------|----------------|-----------|--------------|-------------|--------------|----------|----------|-------------|
| ENSG00000147224 | protein_coding | PRPS1     | -1.016271555 | 4.080617992 | -16.16073881 | 1.87E-46 | 1.01E-44 | 94.841295   |
| ENSG00000125931 | protein_coding | CITED1    | 4.272809805  | 5.731108414 | 16.13152039  | 2.52E-46 | 1.35E-44 | 94.54566251 |
| ENSG00000162545 | protein_coding | CAMK2N1   | 2.983359805  | 5.269949091 | 16.07730864  | 4.37E-46 | 2.32E-44 | 93.99750749 |
| ENSG00000008256 | protein_coding | CYTH3     | -1.155002385 | 3.175660966 | -16.05721368 | 5.36E-46 | 2.82E-44 | 93.79443996 |
| ENSG00000110660 | protein_coding | SLC35F2   | 1.373584955  | 3.332472996 | 16.01102439  | 8.57E-46 | 4.47E-44 | 93.32792792 |
| ENSG00000131981 | protein_coding | LGALS3    | 2.530820428  | 6.852556457 | 16.00279861  | 9.31E-46 | 4.84E-44 | 93.24488421 |
| ENSG00000144152 | protein_coding | FBLN7     | -1.210592525 | 1.646637872 | -15.99073109 | 1.05E-45 | 5.45E-44 | 93.12307608 |
| ENSG00000157600 | protein_coding | TMEM164   | -1.149005013 | 2.574322496 | -15.98463986 | 1.12E-45 | 5.76E-44 | 93.06160111 |
| ENSG00000185090 | protein_coding | MANEAL    | 1.222047161  | 2.39809974  | 15.90585606  | 2.49E-45 | 1.25E-43 | 92.26704208 |
| ENSG00000173535 | protein_coding | TNFRSF10C | 1.54610779   | 2.292523709 | 15.8803294   | 3.23E-45 | 1.61E-43 | 92.00982173 |
| ENSG00000160191 | protein_coding | PDE9A     | 1.293833749  | 2.742022543 | 15.87181241  | 3.52E-45 | 1.75E-43 | 91.92402462 |
| ENSG00000205129 | protein_coding | C4orf47   | -1.02568216  | 1.301152393 | -15.86865325 | 3.63E-45 | 1.80E-43 | 91.8922035  |
| ENSG00000159216 | protein_coding | RUNX1     | 1.525104837  | 2.011348799 | 15.82540756  | 5.63E-45 | 2.77E-43 | 91.45677659 |
| ENSG00000167216 | protein_coding | KATNAL2   | -1.237114457 | 1.176499656 | -15.82297035 | 5.77E-45 | 2.83E-43 | 91.43224669 |
| ENSG00000147606 | protein_coding | SLC26A7   | -3.594185382 | 4.175130375 | -15.8151035  | 6.25E-45 | 3.06E-43 | 91.35307586 |
| ENSG00000164674 | protein_coding | SYTL3     | -1.346835006 | 3.18068847  | -15.81076858 | 6.53E-45 | 3.18E-43 | 91.30945444 |
| ENSG00000101463 | protein_coding | SYNDIG1   | -1.557659792 | 1.158942464 | -15.80226796 | 7.11E-45 | 3.46E-43 | 91.22392386 |
| ENSG00000107130 | protein_coding | NCS1      | -1.076513857 | 3.59321752  | -15.77200303 | 9.66E-45 | 4.68E-43 | 90.91950964 |
| ENSG00000147041 | protein_coding | SYTL5     | 2.381033273  | 2.195354525 | 15.75450763  | 1.15E-44 | 5.56E-43 | 90.74360843 |
| ENSG00000111907 | protein_coding | TPD52L1   | 1.560586934  | 4.073224667 | 15.72125802  | 1.61E-44 | 7.68E-43 | 90.40946081 |
| ENSG00000123836 | protein_coding | PFKFB2    | -1.523726595 | 2.879351906 | -15.70133962 | 1.97E-44 | 9.33E-43 | 90.20938132 |
| ENSG00000166780 | protein_coding | C16orf45  | 1.444327233  | 3.378493532 | 15.68204394  | 2.40E-44 | 1.13E-42 | 90.0156244  |
| ENSG00000115525 | protein_coding | ST3GAL5   | 1.269970332  | 5.174956045 | 15.67705481  | 2.52E-44 | 1.18E-42 | 89.96553706 |
| ENSG00000177191 | protein_coding | B3GNT8    | 1.282416501  | 1.968528554 | 15.67478807  | 2.58E-44 | 1.21E-42 | 89.94278207 |
| ENSG00000198300 | protein_coding | PEG3      | -1.114132701 | 1.12431224  | -15.53549071 | 1.05E-43 | 4.83E-42 | 88.54621682 |
| ENSG00000164855 | protein_coding | TMEM184A  | 1.053585205  | 1.160831926 | 15.50252493  | 1.47E-43 | 6.68E-42 | 88.21623241 |
| ENSG00000162981 | protein_coding | FAM84A    | 1.605597181  | 2.035474905 | 15.49206769  | 1.63E-43 | 7.38E-42 | 88.11159895 |
| ENSG00000131435 | protein_coding | PDLIM4    | 3.067095968  | 4.704615208 | 15.48707403  | 1.71E-43 | 7.71E-42 | 88.06164035 |
| ENSG00000087088 | protein_coding | BAX       | 1.029349328  | 4.514422443 | 15.48253973  | 1.79E-43 | 8.04E-42 | 88.01628157 |
| ENSG00000122176 | protein_coding | FMOD      | -1.911494991 | 4.445292543 | -15.47287706 | 1.98E-43 | 8.81E-42 | 87.91963399 |
| ENSG00000105223 | protein_coding | PLD3      | 1.104157492  | 6.323438799 | 15.45095779  | 2.46E-43 | 1.09E-41 | 87.70045951 |
| ENSG00000116194 | protein_coding | ANGPTL1   | -2.063612032 | 2.512264081 | -15.44125788 | 2.72E-43 | 1.20E-41 | 87.60349751 |
| ENSG00000104611 | protein_coding | SH2D4A    | 1.05884063   | 3.831383629 | 15.4340341   | 2.92E-43 | 1.28E-41 | 87.53129903 |
| ENSG00000107281 | protein_coding | NPDC1     | 1.584141502  | 4.728561897 | 15.42051502  | 3.34E-43 | 1.46E-41 | 87.39620854 |
| ENSG00000156299 | protein_coding | TIAM1     | 1.852256937  | 2.351075689 | 15.36548319  | 5.81E-43 | 2.48E-41 | 86.84666089 |
| ENSG00000103811 | protein_coding | CTSH      | 2.330973881  | 5.653902359 | 15.34398216  | 7.21E-43 | 3.07E-41 | 86.63211082 |
| ENSG00000177697 | protein_coding | CD151     | 1.207905246  | 6.327809072 | 15.32958058  | 8.34E-43 | 3.53E-41 | 86.48845362 |
| ENSG00000105655 | protein_coding | ISYNA1    | 1.376655538  | 4.189656355 | 15.3209293   | 9.09E-43 | 3.82E-41 | 86.40217588 |
| ENSG00000161509 | protein_coding | GRIN2C    | -2.097794752 | 1.21123027  | -15.30877367 | 1.03E-42 | 4.31E-41 | 86.2809745  |
| ENSG00000116299 | protein_coding | KIAA1324  | -1.840588465 | 0.953738525 | -15.29434559 | 1.19E-42 | 4.96E-41 | 86.13715267 |
| ENSG00000102743 | protein_coding | SLC25A15  | -1.843270986 | 2.330524059 | -15.28992624 | 1.24E-42 | 5.17E-41 | 86.09310805 |
| ENSG00000117791 | protein_coding | MARC2     | -1.409555996 | 3.26353857  | -15.28559919 | 1.30E-42 | 5.39E-41 | 86.04998701 |
| ENSG00000156011 | protein_coding | PSD3      | 1.468050799  | 2.816865798 | 15.25195654  | 1.82E-42 | 7.50E-41 | 85.71484911 |
| ENSG00000149294 | protein_coding | NCAM1     | -2.14390117  | 1.760359586 | -15.2503647  | 1.84E-42 | 7.60E-41 | 85.69899726 |
| ENSG0000010810  | protein_coding | FYN       | 1.117913549  | 4.391861611 | 15.24887235  | 1.87E-42 | 7.69E-41 | 85.68413658 |
| ENSG00000120693 | protein_coding | SMAD9     | -1.791444874 | 2.751389957 | -15.23379283 | 2.18E-42 | 8.90E-41 | 85.53400137 |
| ENSG00000076382 | protein_coding | SPAG5     | -1.072369832 | 1.255884306 | -15.21164946 | 2.72E-42 | 1.10E-40 | 85.31361948 |
| ENSG00000085741 | protein_coding | WNT11     | -1.329638012 | 0.748279954 | -15.20740772 | 2.84E-42 | 1.14E-40 | 85.27141485 |
| ENSG00000104059 | protein_coding | FAM189A1  | -1.33573171  | 0.781977437 | -15.17761582 | 3.82E-42 | 1.53E-40 | 84.97509243 |
| ENSG00000173898 | protein_coding | SPTBN2    | 1.396247796  | 1.464273853 | 15.17260553  | 4.02E-42 | 1.59E-40 | 84.92527563 |
| ENSG00000069974 | protein_coding | RAB27A    | 1.572440967  | 4.658853182 | 15.16921085  | 4.16E-42 | 1.64E-40 | 84.89152564 |
| ENSG00000172201 | protein_coding | ID4       | -1.688683499 | 6.614232138 | -15.16103712 | 4.51E-42 | 1.78E-40 | 84.81027179 |
| ENSG00000110492 | protein_coding | MDK       | 2.431740511  | 5.895263188 | 15.14565545  | 5.26E-42 | 2.07E-40 | 84.65740177 |
| ENSG00000001617 | protein_coding | SEMA3F    | 1.268064119  | 4.128730091 | 15.13811731  | 5.67E-42 | 2.22E-40 | 84.58250202 |
| ENSG00000101412 | protein_coding | E2F1      | 1.282262234  | 2.037851195 | 15.10838919  | 7.64E-42 | 2.94E-40 | 84.28723385 |
| ENSG00000050767 | protein_coding | COL23A1   | -2.874008433 | 3.375622323 | -15.09714827 | 8.54E-42 | 3.27E-40 | 84.17563331 |
| ENSG00000086619 | protein_coding | ERO1LB    | -1.289043009 | 2.401665168 | -15.09605205 | 8.64E-42 | 3.30E-40 | 84.16475142 |
| ENSG00000073792 | protein_coding | IGF2BP2   | 1.578787232  | 3.481688299 | 15.09461865  | 8.76E-42 | 3.34E-40 | 84.15052266 |
| ENSG00000186352 | protein_coding | ANKRD37   | -1.107176189 | 1.469615671 | -15.08919425 | 9.25E-42 | 3.51E-40 | 84.09668109 |
| ENSG00000174791 | protein_coding | RIN1      | 1.010027002  | 1.288503605 | 15.08540858  | 9.61E-42 | 3.64E-40 | 84.05910887 |
| ENSG00000197444 | protein_coding | OGDHL     | -2.135205156 | 2.091249671 | -15.06148359 | 1.22E-41 | 4.57E-40 | 83.8217256  |
| ENSG00000161896 | protein_coding | IP6K3     | -1.805893623 | 1.423301968 | -15.05232312 | 1.34E-41 | 4.98E-40 | 83.73086717 |
| ENSG00000175040 | protein_coding | CHST2     | 1.864884787  | 4.31615739  | 15.03209252  | 1.64E-41 | 6.05E-40 | 83.53027143 |
| ENSG00000137077 | protein_coding | CCL21     | -4.998830025 | 3.260957952 | -15.01320259 | 1.97E-41 | 7.26E-40 | 83.34304681 |
| ENSG00000106100 | protein_coding | NOD1      | 1.998826589  | 3.255268264 | 15.00421171  | 2.16E-41 | 7.86E-40 | 83.25396147 |
| ENSG00000164530 | protein_coding | PI16      | -2.470896657 | 1.521845981 | -15.00384603 | 2.17E-41 | 7.87E-40 | 83.25033852 |
| ENSG00000185112 | protein_coding | FAM43A    | 1.862043076  | 3.746885018 | 14.99323467  | 2.41E-41 | 8.73E-40 | 83.1452197  |
| ENSG00000112658 | protein_coding | SRF       | -1.191716669 | 3.993342629 | -14.98956915 | 2.50E-41 | 9.03E-40 | 83.10891363 |
| ENSG00000163545 | protein_coding | NUAK2     | -1.34336092  | 3.006515403 | -14.98476945 | 2.62E-41 | 9.45E-40 | 83.06137816 |
| ENSG00000149948 | protein_coding | HMGA2     | 1.869539671  | 1.712136806 | 14.98027925  | 2.74E-41 | 9.83E-40 | 83.0169123  |
| ENSG00000183696 | protein_coding | UPP1      | 1.750249195  | 3.423817795 | 14.95239757  | 3.62E-41 | 1.29E-39 | 82.74090001 |
| ENSG00000128283 | protein_coding | CDC42EP1  | 1.372231477  | 4.895882033 | 14.94069051  | 4.07E-41 | 1.44E-39 | 82.62505656 |
| ENSG00000109610 | protein_coding | SOD3      | -2.536531988 | 4.140295862 | -14.92692508 | 4.66E-41 | 1.64E-39 | 82.4888828  |

|                 |                |           |              |             |              |          |          |             |
|-----------------|----------------|-----------|--------------|-------------|--------------|----------|----------|-------------|
| ENSG00000184584 | protein_coding | TMEM173   | 1.610197659  | 4.473559034 | 14.91000397  | 5.52E-41 | 1.93E-39 | 82.32154748 |
| ENSG00000006327 | protein_coding | TNFRSF12A | 2.383539984  | 6.096378398 | 14.87580265  | 7.75E-41 | 2.70E-39 | 81.98351494 |
| ENSG00000143333 | protein_coding | RGS16     | -1.945767253 | 4.567781072 | -14.86370529 | 8.75E-41 | 3.04E-39 | 81.86401022 |
| ENSG00000184156 | protein_coding | KCNQ3     | 1.662907984  | 1.61200064  | 14.84679082  | 1.03E-40 | 3.59E-39 | 81.69697299 |
| ENSG00000072310 | protein_coding | SREBF1    | 1.197706728  | 4.09945338  | 14.8346296   | 1.17E-40 | 4.03E-39 | 81.57691472 |
| ENSG00000157502 | protein_coding | MUM1L1    | -1.947992705 | 1.320943989 | -14.83099931 | 1.21E-40 | 4.17E-39 | 81.54108201 |
| ENSG00000009694 | protein_coding | TENM1     | 2.19908101   | 2.262629159 | 14.79109088  | 1.80E-40 | 6.11E-39 | 81.14735817 |
| ENSG00000171219 | protein_coding | CDC42BPG  | 1.048686483  | 3.403774211 | 14.78786172  | 1.86E-40 | 6.29E-39 | 81.11551572 |
| ENSG00000129451 | protein_coding | KLK10     | 3.652381117  | 3.563442133 | 14.78301355  | 1.95E-40 | 6.59E-39 | 81.06771275 |
| ENSG00000156414 | protein_coding | TDRD9     | -1.643450976 | 1.150263987 | -14.77687195 | 2.07E-40 | 6.98E-39 | 81.00716402 |
| ENSG00000175318 | protein_coding | GRAMD2    | -1.19820325  | 1.161544112 | -14.771982   | 2.17E-40 | 7.29E-39 | 80.95896113 |
| ENSG00000137124 | protein_coding | ALDH1B1   | -1.181010594 | 2.919265    | -14.76822612 | 2.26E-40 | 7.55E-39 | 80.92194091 |
| ENSG00000157765 | protein_coding | SLC34A2   | 4.919899056  | 7.744382908 | 14.76522106  | 2.32E-40 | 7.76E-39 | 80.89232357 |
| ENSG00000166016 | protein_coding | ABTB2     | 1.652967615  | 2.421213579 | 14.75574992  | 2.55E-40 | 8.49E-39 | 80.79899076 |
| ENSG00000132334 | protein_coding | PTPRE     | 1.720188445  | 2.661449953 | 14.73994017  | 2.99E-40 | 9.91E-39 | 80.64323923 |
| ENSG00000100253 | protein_coding | MIOX      | -1.923413384 | 1.571556059 | -14.72120944 | 3.60E-40 | 1.18E-38 | 80.45878402 |
| ENSG00000118971 | protein_coding | CCND2     | 1.239429529  | 5.478756456 | 14.71611827  | 3.78E-40 | 1.24E-38 | 80.40866122 |
| ENSG00000167191 | protein_coding | GPRC5B    | 1.171162547  | 3.870899196 | 14.70794009  | 4.10E-40 | 1.34E-38 | 80.32815897 |
| ENSG00000186838 | protein_coding | SELV      | -1.585087147 | 0.771206605 | -14.70376977 | 4.27E-40 | 1.39E-38 | 80.28711401 |
| ENSG00000184916 | protein_coding | JAG2      | 1.030498323  | 2.404347148 | 14.649846    | 7.29E-40 | 2.34E-38 | 79.75674419 |
| ENSG00000221890 | protein_coding | NPTXR     | 1.364179514  | 3.211094319 | 14.63655151  | 8.31E-40 | 2.66E-38 | 79.6260878  |
| ENSG00000076864 | protein_coding | RAP1GAP   | -2.119154127 | 4.414093406 | -14.63302721 | 8.61E-40 | 2.73E-38 | 79.59145823 |
| ENSG00000170271 | protein_coding | FAXDC2    | -1.382924015 | 2.577859051 | -14.62896588 | 8.96E-40 | 2.84E-38 | 79.55155538 |
| ENSG00000100196 | protein_coding | KDEL3     | 1.295556918  | 3.542744829 | 14.60362965  | 1.15E-39 | 3.63E-38 | 79.30271127 |
| ENSG00000148339 | protein_coding | SLC25A25  | -1.337341374 | 2.613010492 | -14.59964889 | 1.20E-39 | 3.76E-38 | 79.26362707 |
| ENSG00000143409 | protein_coding | FAM63A    | -1.039926226 | 3.849729195 | -14.58808751 | 1.34E-39 | 4.20E-38 | 79.15013496 |
| ENSG00000171552 | protein_coding | BCL2L1    | 1.111057742  | 5.380483412 | 14.58777282  | 1.35E-39 | 4.21E-38 | 79.14704624 |
| ENSG00000164442 | protein_coding | CITED2    | -1.909651187 | 5.948016959 | -14.58067865 | 1.44E-39 | 4.49E-38 | 79.07742235 |
| ENSG00000163472 | protein_coding | TMEM79    | 1.476412069  | 2.656416904 | 14.53429945  | 2.28E-39 | 7.04E-38 | 78.62253519 |
| ENSG00000078804 | protein_coding | TP53INP2  | -1.240812867 | 3.601777298 | -14.52658852 | 2.46E-39 | 7.58E-38 | 78.54695533 |
| ENSG00000013619 | protein_coding | MAMLD1    | 1.522597953  | 1.900065605 | 14.52490904  | 2.50E-39 | 7.69E-38 | 78.53049554 |
| ENSG00000140905 | protein_coding | GCSH      | -1.133207698 | 2.408124868 | -14.51985361 | 2.63E-39 | 8.06E-38 | 78.48095348 |
| ENSG00000167880 | protein_coding | EVPL      | 1.19947784   | 3.973400964 | 14.51818318  | 2.68E-39 | 8.18E-38 | 78.46458504 |
| ENSG00000139211 | protein_coding | AMIGO2    | 1.78947722   | 2.96012924  | 14.51502257  | 2.76E-39 | 8.40E-38 | 78.43361612 |
| ENSG00000154175 | protein_coding | ABI3BP    | -1.900236219 | 1.851178343 | -14.51282971 | 2.82E-39 | 8.56E-38 | 78.41213101 |
| ENSG00000215218 | protein_coding | UBE2QL1   | 1.552592818  | 2.310042797 | 14.50656502  | 3.00E-39 | 9.07E-38 | 78.35075734 |
| ENSG00000084444 | protein_coding | KIAA1467  | -1.019063316 | 1.439550122 | -14.49729759 | 3.29E-39 | 9.92E-38 | 78.25998345 |
| ENSG00000022267 | protein_coding | FHL1      | -2.69363702  | 4.441402837 | -14.494411   | 3.38E-39 | 1.02E-37 | 78.23171373 |
| ENSG00000166402 | protein_coding | TUB       | -1.164058729 | 1.912487441 | -14.48585641 | 3.68E-39 | 1.10E-37 | 78.14794603 |
| ENSG00000203485 | protein_coding | INF2      | 1.428205683  | 3.776995938 | 14.46292141  | 4.61E-39 | 1.37E-37 | 77.92344943 |
| ENSG00000116260 | protein_coding | QSOX1     | 1.41521389   | 4.063696951 | 14.43232372  | 6.24E-39 | 1.85E-37 | 77.62414323 |
| ENSG00000124766 | protein_coding | SOX4      | 1.557655266  | 4.568537998 | 14.42174988  | 6.92E-39 | 2.04E-37 | 77.5207623  |
| ENSG00000151849 | protein_coding | CENPJ     | -1.226428004 | 1.449104636 | -14.39094182 | 9.37E-39 | 2.74E-37 | 77.21970431 |
| ENSG00000156711 | protein_coding | MAPK13    | 1.024820867  | 4.239104008 | 14.38741096  | 9.70E-39 | 2.83E-37 | 77.18521523 |
| ENSG00000106541 | protein_coding | AGR2      | 2.645594154  | 3.568852279 | 14.38557176  | 9.88E-39 | 2.88E-37 | 77.16725133 |
| ENSG00000162576 | protein_coding | MXRA8     | 2.140700525  | 5.90303396  | 14.38202745  | 1.02E-38 | 2.97E-37 | 77.13263551 |
| ENSG00000115705 | protein_coding | TPO       | -4.87675857  | 5.048038325 | -14.33506408 | 1.62E-38 | 4.69E-37 | 76.67425253 |
| ENSG00000167600 | protein_coding | CYP2S1    | 2.104199028  | 2.401303976 | 14.30819291  | 2.11E-38 | 6.10E-37 | 76.41222141 |
| ENSG00000204991 | protein_coding | SPIRE2    | -1.073950464 | 1.181269438 | -14.29137036 | 2.49E-38 | 7.13E-37 | 76.24826898 |
| ENSG00000089327 | protein_coding | FXYS5     | 1.857467496  | 4.874369201 | 14.2878346   | 2.58E-38 | 7.37E-37 | 76.21381832 |
| ENSG00000147065 | protein_coding | MSN       | 1.048872343  | 7.192202411 | 14.28371389  | 2.68E-38 | 7.66E-37 | 76.17367227 |
| ENSG00000106809 | protein_coding | OGN       | -1.892801502 | 1.149300967 | -14.28332685 | 2.69E-38 | 7.67E-37 | 76.16990169 |
| ENSG00000168490 | protein_coding | PHYHIP    | 1.618961284  | 2.601260333 | 14.27280093  | 2.99E-38 | 8.49E-37 | 76.06737279 |
| ENSG00000188643 | protein_coding | S100A16   | 1.148224729  | 5.883482298 | 14.26184209  | 3.33E-38 | 9.41E-37 | 75.96065625 |
| ENSG00000125257 | protein_coding | ABCC4     | -1.016409938 | 1.081527287 | -14.26096799 | 3.36E-38 | 9.47E-37 | 75.95214561 |
| ENSG00000179913 | protein_coding | B3GNT3    | 3.415349649  | 3.32202944  | 14.25262998  | 3.64E-38 | 1.02E-36 | 75.87097242 |
| ENSG00000162616 | protein_coding | DNAJB4    | -1.186618935 | 3.360515303 | -14.24398355 | 3.96E-38 | 1.11E-36 | 75.78681512 |
| ENSG00000211448 | protein_coding | DI02      | -2.274290805 | 4.481435319 | -14.20288302 | 5.93E-38 | 1.64E-36 | 75.38703205 |
| ENSG00000173227 | protein_coding | SYT12     | 2.749197723  | 2.486056025 | 14.20243954  | 5.95E-38 | 1.64E-36 | 75.38272063 |
| ENSG00000198121 | protein_coding | LPAR1     | -1.185193545 | 1.933727081 | -14.19981051 | 6.11E-38 | 1.68E-36 | 75.35716302 |
| ENSG00000118257 | protein_coding | NRP2      | 1.782973435  | 3.551864857 | 14.18714884  | 6.91E-38 | 1.89E-36 | 75.2340991  |
| ENSG00000115363 | protein_coding | EVA1A     | 1.937654506  | 2.731063966 | 14.18628287  | 6.97E-38 | 1.90E-36 | 75.22568384 |
| ENSG00000120262 | protein_coding | CCDC170   | -1.008560417 | 1.514085435 | -14.18038222 | 7.38E-38 | 2.01E-36 | 75.16834819 |
| ENSG00000204839 | protein_coding | MROH6     | 1.307349355  | 1.697942368 | 14.16436414  | 8.64E-38 | 2.35E-36 | 75.01274773 |
| ENSG00000108924 | protein_coding | HLF       | -1.820393738 | 1.71630659  | -14.14593244 | 1.03E-37 | 2.80E-36 | 74.83378193 |
| ENSG00000123700 | protein_coding | KCNJ2     | 2.116297658  | 2.367500412 | 14.13502638  | 1.15E-37 | 3.11E-36 | 74.72792851 |
| ENSG00000104324 | protein_coding | CPQ       | -1.266970467 | 5.729233662 | -14.13075275 | 1.20E-37 | 3.23E-36 | 74.68645731 |
| ENSG00000116991 | protein_coding | SIPA1L2   | 1.147777371  | 3.063088683 | 14.12599144  | 1.26E-37 | 3.37E-36 | 74.64025921 |
| ENSG00000104635 | protein_coding | SLC39A14  | -1.390863936 | 4.0952121   | -14.11649928 | 1.38E-37 | 3.69E-36 | 74.54817581 |
| ENSG00000158246 | protein_coding | FAM46B    | -1.449692047 | 1.620692293 | -14.08000961 | 1.97E-37 | 5.20E-36 | 74.19440568 |
| ENSG00000105650 | protein_coding | PDE4C     | 1.370467518  | 1.45422121  | 14.05181151  | 2.59E-37 | 6.84E-36 | 73.92125903 |
| ENSG00000174348 | protein_coding | PODN      | -1.662417079 | 1.396224123 | -14.04495603 | 2.77E-37 | 7.28E-36 | 73.85488333 |
| ENSG00000171236 | protein_coding | LRG1      | 1.827583871  | 2.04520174  | 14.03490275  | 3.06E-37 | 7.97E-36 | 73.75756817 |



|                 |                |         |              |             |              |          |          |             |
|-----------------|----------------|---------|--------------|-------------|--------------|----------|----------|-------------|
| ENSG00000109501 | protein_coding | WFS1    | -1.223404715 | 3.997924324 | -14.02825919 | 3.26E-37 | 8.46E-36 | 73.69327344 |
| ENSG00000152518 | protein_coding | ZFP36L2 | -1.2737806   | 6.309489739 | -14.02028558 | 3.52E-37 | 9.08E-36 | 73.6161221  |
| ENSG00000091137 | protein_coding | SLC26A4 | -3.327189978 | 4.215777263 | -14.01329606 | 3.77E-37 | 9.70E-36 | 73.54850627 |
| ENSG00000156049 | protein_coding | GNA14   | -1.779023409 | 2.086041815 | -13.99971389 | 4.30E-37 | 1.10E-35 | 73.41715067 |
| ENSG00000138735 | protein_coding | PDE5A   | 2.164274272  | 4.418530668 | 13.96803876  | 5.86E-37 | 1.48E-35 | 73.11100379 |
| ENSG00000163827 | protein_coding | LRRC2   | -1.403606894 | 2.493037528 | -13.95935065 | 6.37E-37 | 1.60E-35 | 73.02707778 |
| ENSG00000138759 | protein_coding | FRAS1   | -1.213782172 | 1.406928829 | -13.94882197 | 7.06E-37 | 1.77E-35 | 72.92539891 |
| ENSG00000147883 | protein_coding | CDKN2B  | 1.384347701  | 1.656753717 | 13.94191396  | 7.55E-37 | 1.89E-35 | 72.85870211 |
| ENSG00000188483 | protein_coding | IER5L   | 1.673620051  | 2.80112236  | 13.93658113  | 7.95E-37 | 1.98E-35 | 72.80722232 |
| ENSG00000275395 | protein_coding | FCGBP   | -1.964677438 | 4.869625517 | -13.91525864 | 9.78E-37 | 2.42E-35 | 72.60146429 |
| ENSG00000142611 | protein_coding | PRDM16  | -1.106557751 | 1.812113475 | -13.87716797 | 1.42E-36 | 3.48E-35 | 72.2341999  |
| ENSG00000055813 | protein_coding | CCDC85A | -1.050925924 | 1.048518403 | -13.87494172 | 1.45E-36 | 3.55E-35 | 72.21274685 |
| ENSG00000162512 | protein_coding | SDC3    | 1.251586829  | 4.14927114  | 13.87060425  | 1.51E-36 | 3.68E-35 | 72.17095296 |
| ENSG00000158055 | protein_coding | GRHL3   | 1.261637749  | 1.165735759 | 13.86715271  | 1.56E-36 | 3.80E-35 | 72.13769922 |
| ENSG00000077092 | protein_coding | RARB    | -1.05780536  | 1.698808014 | -13.85956164 | 1.68E-36 | 4.07E-35 | 72.06457456 |
| ENSG00000149218 | protein_coding | ENDOD1  | 1.372262225  | 4.550034172 | 13.84425911  | 1.95E-36 | 4.69E-35 | 71.91721304 |
| ENSG00000119318 | protein_coding | RAD23B  | 1.034788694  | 5.850284757 | 13.83677295  | 2.10E-36 | 5.03E-35 | 71.84514536 |
| ENSG00000169047 | protein_coding | IRS1    | -1.673470752 | 2.834235402 | -13.82735664 | 2.30E-36 | 5.49E-35 | 71.75451822 |
| ENSG00000167749 | protein_coding | KLK4    | -1.302301143 | 0.694637014 | -13.81303666 | 2.64E-36 | 6.28E-35 | 71.61674214 |
| ENSG00000197467 | protein_coding | COL13A1 | 1.460951294  | 1.626587457 | 13.75302577  | 4.71E-36 | 1.11E-34 | 71.03997423 |
| ENSG00000135821 | protein_coding | GLUL    | -1.037819637 | 6.262710876 | -13.74452262 | 5.12E-36 | 1.21E-34 | 70.95833032 |
| ENSG00000144810 | protein_coding | COL8A1  | 1.507789432  | 4.927997693 | 13.71622524  | 6.73E-36 | 1.57E-34 | 70.68677461 |
| ENSG00000183943 | protein_coding | PRKX    | -1.336859798 | 3.499848572 | -13.70898027 | 7.21E-36 | 1.67E-34 | 70.61728413 |
| ENSG00000105755 | protein_coding | ETHE1   | 1.395627296  | 4.802907366 | 13.70074895  | 7.81E-36 | 1.80E-34 | 70.53835073 |
| ENSG00000181690 | protein_coding | PLAG1   | 1.172765358  | 1.80880949  | 13.6880766   | 8.83E-36 | 2.02E-34 | 70.41686774 |
| ENSG00000090339 | protein_coding | ICAM1   | 2.019963586  | 4.530363949 | 13.66225553  | 1.13E-35 | 2.57E-34 | 70.16947438 |
| ENSG00000198417 | protein_coding | MT1F    | -3.000901977 | 4.32832936  | -13.647873   | 1.30E-35 | 2.94E-34 | 70.03175582 |
| ENSG00000171159 | protein_coding | C9orf16 | 1.266382121  | 5.04183606  | 13.64404777  | 1.35E-35 | 3.04E-34 | 69.99513748 |
| ENSG00000184905 | protein_coding | TCEAL2  | -2.794513016 | 2.524834132 | -13.63336391 | 1.50E-35 | 3.36E-34 | 69.89288465 |
| ENSG00000184292 | protein_coding | TACSTD2 | 3.921963721  | 6.378869296 | 13.63212019  | 1.51E-35 | 3.40E-34 | 69.88098337 |
| ENSG00000150687 | protein_coding | PRSS23  | 2.021712089  | 4.356656982 | 13.63147178  | 1.52E-35 | 3.41E-34 | 69.87477879 |
| ENSG00000131015 | protein_coding | ULBP2   | 1.393288954  | 1.761752763 | 13.6254214   | 1.61E-35 | 3.61E-34 | 69.81688951 |
| ENSG00000166426 | protein_coding | CRABP1  | -3.662384265 | 3.537036807 | -13.62414357 | 1.63E-35 | 3.64E-34 | 69.80466472 |
| ENSG00000233276 | protein_coding | GPX1    | 1.040613822  | 7.426509044 | 13.61732021  | 1.75E-35 | 3.88E-34 | 69.73939467 |
| ENSG00000110811 | protein_coding | P3H3    | 1.041502013  | 3.67510275  | 13.59769035  | 2.11E-35 | 4.67E-34 | 69.55169547 |
| ENSG00000006210 | protein_coding | CX3CL1  | 1.251631421  | 4.114718934 | 13.59205126  | 2.23E-35 | 4.91E-34 | 69.4977952  |
| ENSG00000165795 | protein_coding | NDRG2   | -1.001751218 | 2.969837999 | -13.57737532 | 2.56E-35 | 5.63E-34 | 69.35756058 |
| ENSG00000170323 | protein_coding | FABP4   | -2.558371934 | 1.884914573 | -13.56643153 | 2.85E-35 | 6.23E-34 | 69.25302819 |
| ENSG00000115041 | protein_coding | KCNIP3  | -1.371541072 | 2.05548234  | -13.55390771 | 3.21E-35 | 7.01E-34 | 69.13344602 |
| ENSG00000154319 | protein_coding | FAM167A | -2.771721963 | 2.925369999 | -13.54492692 | 3.50E-35 | 7.63E-34 | 69.04772184 |
| ENSG00000164171 | protein_coding | ITGA2   | 2.061028854  | 2.997458216 | 13.54422418  | 3.53E-35 | 7.67E-34 | 69.04101503 |
| ENSG00000169071 | protein_coding | ROR2    | -1.471431673 | 1.40553045  | -13.4814996  | 6.44E-35 | 1.38E-33 | 68.44295453 |
| ENSG00000140931 | protein_coding | CMTM3   | 1.198293757  | 3.713632106 | 13.4713615   | 7.10E-35 | 1.51E-33 | 68.34639825 |
| ENSG00000162614 | protein_coding | NEXN    | -1.103449288 | 1.230307164 | -13.44744665 | 8.93E-35 | 1.89E-33 | 68.11874982 |
| ENSG00000196923 | protein_coding | PDLIM7  | 1.108614881  | 3.41670146  | 13.42105205  | 1.15E-34 | 2.42E-33 | 67.86769138 |
| ENSG00000115226 | protein_coding | FNDC4   | 1.965251091  | 3.458251289 | 13.41516132  | 1.22E-34 | 2.55E-33 | 67.81168838 |
| ENSG00000213937 | protein_coding | CLDN9   | 1.861396948  | 2.404034483 | 13.39844353  | 1.43E-34 | 2.96E-33 | 67.65280872 |
| ENSG00000187045 | protein_coding | TMPRSS6 | 3.2033927    | 2.921184973 | 13.38386107  | 1.64E-34 | 3.38E-33 | 67.51429017 |
| ENSG00000175643 | protein_coding | RMI2    | 1.089040133  | 2.128326765 | 13.37213441  | 1.84E-34 | 3.77E-33 | 67.40294466 |
| ENSG00000088387 | protein_coding | DOCK9   | 1.2608345    | 4.276325661 | 13.36467903  | 1.97E-34 | 4.04E-33 | 67.33217651 |
| ENSG00000177990 | protein_coding | DPY19L2 | -1.117942467 | 1.148032924 | -13.36455102 | 1.97E-34 | 4.04E-33 | 67.33096156 |
| ENSG00000164935 | protein_coding | DCSTAMP | 4.22792615   | 4.092672638 | 13.35414654  | 2.18E-34 | 4.45E-33 | 67.23222814 |
| ENSG00000112378 | protein_coding | PERP    | 1.509487592  | 5.65542511  | 13.34444045  | 2.39E-34 | 4.86E-33 | 67.14015129 |
| ENSG00000134202 | protein_coding | GSTM3   | -1.609199838 | 2.993698952 | -13.34407058 | 2.40E-34 | 4.87E-33 | 67.13664304 |
| ENSG00000177283 | protein_coding | FZD8    | -1.08559768  | 1.942176831 | -13.33541664 | 2.61E-34 | 5.26E-33 | 67.05457216 |
| ENSG00000244734 | protein_coding | HBB     | -2.594217393 | 4.272777858 | -13.31526002 | 3.16E-34 | 6.33E-33 | 66.86350111 |
| ENSG00000122861 | protein_coding | PLAU    | 2.808951394  | 5.059411624 | 13.30931245  | 3.34E-34 | 6.68E-33 | 66.80714561 |
| ENSG00000186007 | protein_coding | LEMD1   | 1.234412906  | 1.752374997 | 13.29261789  | 3.92E-34 | 7.77E-33 | 66.64901526 |
| ENSG00000126878 | protein_coding | AIF1L   | -1.629261729 | 4.574188498 | -13.28598988 | 4.18E-34 | 8.27E-33 | 66.5862583  |
| ENSG00000113361 | protein_coding | CDH6    | 1.679688059  | 1.964454904 | 13.25716486  | 5.50E-34 | 1.08E-32 | 66.31348526 |
| ENSG00000053918 | protein_coding | KCNQ1   | -1.059887567 | 4.908237894 | -13.23694221 | 6.67E-34 | 1.30E-32 | 66.12226792 |
| ENSG00000124602 | protein_coding | UNC5CL  | 1.289522814  | 1.595267105 | 13.22778456  | 7.27E-34 | 1.42E-32 | 66.03571801 |
| ENSG00000007516 | protein_coding | BAIAP3  | 1.706990936  | 1.916614959 | 13.22319358  | 7.60E-34 | 1.48E-32 | 65.99233777 |
| ENSG00000132205 | protein_coding | EMILIN2 | 1.403992557  | 2.984001853 | 13.19381187  | 1.00E-33 | 1.95E-32 | 65.71486309 |
| ENSG00000148700 | protein_coding | ADD3    | -1.063844111 | 4.261358137 | -13.18653467 | 1.08E-33 | 2.08E-32 | 65.6461798  |
| ENSG00000189058 | protein_coding | APOD    | -2.40217665  | 3.020154444 | -13.17123414 | 1.25E-33 | 2.40E-32 | 65.50182451 |
| ENSG00000138678 | protein_coding | AGPAT9  | -1.210154797 | 2.957199199 | -13.15147306 | 1.50E-33 | 2.88E-32 | 65.31549274 |
| ENSG00000211452 | protein_coding | DIO1    | -4.006104963 | 3.122991669 | -13.13600043 | 1.74E-33 | 3.31E-32 | 65.16968233 |
| ENSG00000163590 | protein_coding | PPM1L   | -1.087562515 | 1.468355284 | -13.1319557  | 1.81E-33 | 3.43E-32 | 65.13157811 |
| ENSG00000174607 | protein_coding | UGT8    | -1.121117864 | 1.100764888 | -13.11791492 | 2.07E-33 | 3.90E-32 | 64.99934343 |
| ENSG00000173599 | protein_coding | PC      | 1.302110179  | 3.433531366 | 13.10958292  | 2.24E-33 | 4.22E-32 | 64.92090264 |
| ENSG00000151365 | protein_coding | THRSP   | 2.255751645  | 3.190385895 | 13.10710706  | 2.29E-33 | 4.31E-32 | 64.89759809 |
| ENSG00000147255 | protein_coding | IGSF1   | 3.380074933  | 4.71540107  | 13.09136633  | 2.66E-33 | 4.99E-32 | 64.7494801  |

|                 |                |          |               |              |               |           |           |              |
|-----------------|----------------|----------|---------------|--------------|---------------|-----------|-----------|--------------|
| ENSG00000172159 | protein_coding | FRMD3    | 1. 972456273  | 4. 165073993 | 13. 08865123  | 2. 73E-33 | 5. 11E-32 | 64. 72393926 |
| ENSG0000026508  | protein_coding | CD44     | 1. 140161031  | 5. 544703557 | 13. 08396638  | 2. 85E-33 | 5. 33E-32 | 64. 6798745  |
| ENSG00000167513 | protein_coding | CDT1     | 1. 044764728  | 1. 798052506 | 13. 07856307  | 3. 00E-33 | 5. 60E-32 | 64. 62906064 |
| ENSG00000174938 | protein_coding | SEZ6L2   | 2. 254874258  | 2. 643330462 | 13. 07797537  | 3. 02E-33 | 5. 62E-32 | 64. 62353436 |
| ENSG00000145703 | protein_coding | IQGAP2   | -1. 786159539 | 2. 21795605  | -13. 07123538 | 3. 22E-33 | 5. 99E-32 | 64. 5601642  |
| ENSG00000152207 | protein_coding | CYSLTR2  | 2. 087130322  | 2. 590758951 | 13. 06215713  | 3. 50E-33 | 6. 51E-32 | 64. 47483213 |
| ENSG00000185818 | protein_coding | NAT8L    | 1. 91899814   | 2. 554411806 | 13. 04600073  | 4. 08E-33 | 7. 53E-32 | 64. 3230326  |
| ENSG00000161921 | protein_coding | CXCL16   | 1. 054342027  | 4. 34214139  | 13. 043384    | 4. 19E-33 | 7. 70E-32 | 64. 29845455 |
| ENSG00000141232 | protein_coding | TOB1     | -1. 41278179  | 4. 56581469  | -13. 03298799 | 4. 62E-33 | 8. 48E-32 | 64. 20082986 |
| ENSG00000105427 | protein_coding | CNFN     | 1. 452155245  | 2. 098898736 | 13. 03158287  | 4. 68E-33 | 8. 57E-32 | 64. 18763762 |
| ENSG00000104783 | protein_coding | KCNN4    | 2. 732771102  | 3. 313706868 | 13. 02976602  | 4. 76E-33 | 8. 70E-32 | 64. 17058064 |
| ENSG00000109956 | protein_coding | B3GAT1   | 1. 245048334  | 2. 077293176 | 13. 01959653  | 5. 24E-33 | 9. 57E-32 | 64. 07512673 |
| ENSG00000162722 | protein_coding | TRIM58   | -1. 501112766 | 1. 605724989 | -13. 01240067 | 5. 61E-33 | 1. 02E-31 | 64. 00760402 |
| ENSG00000125798 | protein_coding | FOXA2    | -1. 710750805 | 1. 068655071 | -13. 01179929 | 5. 64E-33 | 1. 03E-31 | 64. 00196172 |
| ENSG00000165072 | protein_coding | MAMDC2   | -1. 189012963 | 1. 285862678 | -12. 99790113 | 6. 43E-33 | 1. 17E-31 | 63. 87159718 |
| ENSG00000125845 | protein_coding | BMP2     | -1. 690923742 | 2. 982467321 | -12. 99362355 | 6. 70E-33 | 1. 22E-31 | 63. 83148602 |
| ENSG00000106799 | protein_coding | TGFBR1   | 1. 429148766  | 3. 933848178 | 12. 98076775  | 7. 56E-33 | 1. 36E-31 | 63. 71097133 |
| ENSG00000164638 | protein_coding | SLC29A4  | -1. 396878334 | 1. 086956406 | -12. 97387634 | 8. 07E-33 | 1. 45E-31 | 63. 64639075 |
| ENSG00000105643 | protein_coding | ARRDC2   | 1. 02351261   | 4. 156474189 | 12. 97374015  | 8. 08E-33 | 1. 45E-31 | 63. 64511465 |
| ENSG00000123901 | protein_coding | GPR83    | -1. 207807672 | 0. 938362547 | -12. 96587383 | 8. 70E-33 | 1. 56E-31 | 63. 57141693 |
| ENSG00000196083 | protein_coding | IL1RAP   | 1. 373137185  | 1. 826994383 | 12. 94787806  | 1. 03E-32 | 1. 84E-31 | 63. 40289375 |
| ENSG00000115380 | protein_coding | EFEMP1   | -2. 10077206  | 4. 062956057 | -12. 91982684 | 1. 34E-32 | 2. 38E-31 | 63. 14041362 |
| ENSG00000126500 | protein_coding | FLRT1    | -1. 466456236 | 0. 727701268 | -12. 9105495  | 1. 47E-32 | 2. 59E-31 | 63. 05366012 |
| ENSG00000197956 | protein_coding | S100A6   | 1. 811346711  | 10. 72909185 | 12. 88287185  | 1. 90E-32 | 3. 34E-31 | 62. 79500911 |
| ENSG00000137868 | protein_coding | STRA6    | 1. 902072714  | 1. 78120836  | 12. 88212179  | 1. 92E-32 | 3. 36E-31 | 62. 78800319 |
| ENSG00000152284 | protein_coding | TCF7L1   | -1. 514819885 | 2. 153141784 | -12. 88003078 | 1. 95E-32 | 3. 42E-31 | 62. 7684731  |
| ENSG00000198829 | protein_coding | SUCNR1   | -1. 126115017 | 1. 255813536 | -12. 86475088 | 2. 26E-32 | 3. 94E-31 | 62. 62580188 |
| ENSG00000137648 | protein_coding | TMPRSS4  | 2. 524709536  | 2. 318307605 | 12. 86143712  | 2. 33E-32 | 4. 05E-31 | 62. 59487076 |
| ENSG00000088992 | protein_coding | TESC     | 2. 439198806  | 4. 71839838  | 12. 85252903  | 2. 53E-32 | 4. 39E-31 | 62. 51173918 |
| ENSG00000124225 | protein_coding | PMEPA1   | 1. 054053854  | 3. 511748896 | 12. 84478095  | 2. 72E-32 | 4. 71E-31 | 62. 4394542  |
| ENSG00000163884 | protein_coding | KLF15    | -1. 150392914 | 1. 357737322 | -12. 84055926 | 2. 83E-32 | 4. 89E-31 | 62. 40007664 |
| ENSG00000165495 | protein_coding | PKNOX2   | -1. 795412632 | 1. 228490016 | -12. 83200395 | 3. 07E-32 | 5. 29E-31 | 62. 32029544 |
| ENSG00000151136 | protein_coding | BTBD11   | -1. 501695215 | 1. 84757732  | -12. 83014028 | 3. 12E-32 | 5. 38E-31 | 62. 30291928 |
| ENSG00000101400 | protein_coding | SNTA1    | -1. 214635378 | 5. 280816337 | -12. 82328606 | 3. 33E-32 | 5. 71E-31 | 62. 23902297 |
| ENSG00000168140 | protein_coding | VASN     | 1. 363509846  | 5. 272753347 | 12. 82292255  | 3. 34E-32 | 5. 72E-31 | 62. 23563474 |
| ENSG00000012223 | protein_coding | LTF      | -2. 031397029 | 1. 489054081 | -12. 80849576 | 3. 83E-32 | 6. 55E-31 | 62. 10119786 |
| ENSG00000139044 | protein_coding | B4GALNT3 | 1. 265145537  | 2. 473126328 | 12. 78144094  | 4. 93E-32 | 8. 38E-31 | 61. 84927181 |
| ENSG00000205364 | protein_coding | MT1M     | -1. 939453098 | 1. 850623342 | -12. 77311503 | 5. 33E-32 | 9. 03E-31 | 61. 77179236 |
| ENSG00000133169 | protein_coding | BEX1     | -2. 563512444 | 2. 788556959 | -12. 77257505 | 5. 36E-32 | 9. 06E-31 | 61. 76676822 |
| ENSG00000136842 | protein_coding | TMOD1    | -1. 598010866 | 1. 768958392 | -12. 70734164 | 9. 88E-32 | 1. 65E-30 | 61. 16053125 |
| ENSG00000126368 | protein_coding | NR1D1    | 1. 915338503  | 4. 115527523 | 12. 70078118  | 1. 05E-31 | 1. 75E-30 | 61. 09964161 |
| ENSG00000102007 | protein_coding | PLP2     | 1. 292104744  | 5. 763494406 | 12. 6829029   | 1. 24E-31 | 2. 06E-30 | 60. 93378167 |
| ENSG00000170214 | protein_coding | ADRA1B   | 1. 124356838  | 1. 559462838 | 12. 68174933  | 1. 25E-31 | 2. 08E-30 | 60. 92308342 |
| ENSG00000004776 | protein_coding | HSPB6    | -1. 514538314 | 1. 767337522 | -12. 66265324 | 1. 50E-31 | 2. 48E-30 | 60. 74605244 |
| ENSG00000005001 | protein_coding | PRSS22   | 1. 197985556  | 2. 64509345  | 12. 66074681  | 1. 53E-31 | 2. 52E-30 | 60. 72838567 |
| ENSG00000141401 | protein_coding | IMPA2    | -1. 13013217  | 2. 502197982 | -12. 64812199 | 1. 72E-31 | 2. 82E-30 | 60. 61142297 |
| ENSG00000158825 | protein_coding | CDA      | 1. 23730455   | 2. 238929617 | 12. 64454465  | 1. 78E-31 | 2. 92E-30 | 60. 5782905  |
| ENSG00000168481 | protein_coding | LGI3     | -1. 831046829 | 1. 727856702 | -12. 63263327 | 1. 98E-31 | 3. 25E-30 | 60. 46800176 |
| ENSG00000136040 | protein_coding | PLXNC1   | 1. 758231492  | 2. 848427657 | 12. 6274907   | 2. 08E-31 | 3. 41E-30 | 60. 42040106 |
| ENSG00000178602 | protein_coding | OTOS     | -2. 68307003  | 3. 537822467 | -12. 60883155 | 2. 48E-31 | 4. 01E-30 | 60. 24776413 |
| ENSG00000178826 | protein_coding | TMEM139  | -1. 86842582  | 1. 606742224 | -12. 57529543 | 3. 39E-31 | 5. 44E-30 | 59. 93778363 |
| ENSG00000140092 | protein_coding | FBLN5    | -1. 196297153 | 2. 686623964 | -12. 57178205 | 3. 50E-31 | 5. 61E-30 | 59. 90533118 |
| ENSG00000124216 | protein_coding | SNAI1    | -1. 324202344 | 2. 187724999 | -12. 56750675 | 3. 64E-31 | 5. 82E-30 | 59. 86584681 |
| ENSG00000081479 | protein_coding | LRP2     | -1. 937736183 | 2. 631355651 | -12. 56199497 | 3. 83E-31 | 6. 11E-30 | 59. 81495224 |
| ENSG00000166482 | protein_coding | MFAP4    | -2. 420304167 | 2. 823163527 | -12. 55990366 | 3. 91E-31 | 6. 21E-30 | 59. 79564432 |
| ENSG00000149798 | protein_coding | CDC42EP2 | -1. 056935844 | 3. 277101046 | -12. 52646256 | 5. 33E-31 | 8. 41E-30 | 59. 48710639 |
| ENSG00000185052 | protein_coding | SLC24A3  | -1. 099679278 | 0. 987927106 | -12. 52310249 | 5. 50E-31 | 8. 67E-30 | 59. 45612676 |
| ENSG00000103647 | protein_coding | CORO2B   | -1. 031123741 | 1. 169594012 | -12. 52283411 | 5. 51E-31 | 8. 68E-30 | 59. 45365251 |
| ENSG00000146197 | protein_coding | SCUBE3   | -1. 803636104 | 2. 935212803 | -12. 5202311  | 5. 65E-31 | 8. 89E-30 | 59. 42965585 |
| ENSG00000175920 | protein_coding | DOK7     | 1. 47366666   | 1. 702300684 | 12. 51563921  | 5. 90E-31 | 9. 25E-30 | 59. 38732994 |
| ENSG00000048540 | protein_coding | LMO3     | 1. 265669961  | 4. 776772706 | 12. 50728335  | 6. 37E-31 | 9. 97E-30 | 59. 31032831 |
| ENSG00000164078 | protein_coding | MST1R    | 1. 000181408  | 1. 791785604 | 12. 50242641  | 6. 67E-31 | 1. 04E-29 | 59. 2655814  |
| ENSG00000100600 | protein_coding | LGMN     | -1. 021060811 | 4. 968371772 | -12. 50192033 | 6. 70E-31 | 1. 04E-29 | 59. 2609194  |
| ENSG00000165929 | protein_coding | TC2N     | -1. 028733699 | 2. 098373157 | -12. 48943836 | 7. 52E-31 | 1. 17E-29 | 59. 14596325 |
| ENSG00000162496 | protein_coding | DHRS3    | 1. 611236009  | 6. 920681457 | 12. 48128097  | 8. 11E-31 | 1. 26E-29 | 59. 07086487 |
| ENSG00000147100 | protein_coding | SLC16A2  | -1. 574861381 | 2. 836387129 | -12. 45992406 | 9. 89E-31 | 1. 52E-29 | 58. 87436014 |
| ENSG00000109906 | protein_coding | ZBTB16   | -1. 43560519  | 1. 338773178 | -12. 45955648 | 9. 92E-31 | 1. 52E-29 | 58. 87097939 |
| ENSG00000162366 | protein_coding | PDZK1IP1 | 3. 217770183  | 4. 055666387 | 12. 45400746  | 1. 04E-30 | 1. 60E-29 | 58. 81994987 |
| ENSG00000182489 | protein_coding | XKRX     | 1. 540120503  | 1. 613599222 | 12. 4382844   | 1. 21E-30 | 1. 85E-29 | 58. 67541742 |
| ENSG00000169035 | protein_coding | KLK7     | 3. 208623328  | 3. 06705139  | 12. 42852372  | 1. 32E-30 | 2. 02E-29 | 58. 58573729 |
| ENSG00000162595 | protein_coding | DIRAS3   | 1. 733090052  | 3. 438658206 | 12. 41468595  | 1. 50E-30 | 2. 28E-29 | 58. 45865508 |
| ENSG00000181649 | protein_coding | PHLDA2   | 1. 708035817  | 3. 946862141 | 12. 41287561  | 1. 53E-30 | 2. 32E-29 | 58. 44203444 |
| ENSG00000196420 | protein_coding | S100A5   | 1. 463799714  | 3. 332342395 | 12. 40866491  | 1. 59E-30 | 2. 40E-29 | 58. 40338071 |

|                 |                |          |              |             |              |          |          |             |
|-----------------|----------------|----------|--------------|-------------|--------------|----------|----------|-------------|
| ENSG00000205358 | protein_coding | MT1H     | -3.484436719 | 2.36026452  | -12.39245245 | 1.85E-30 | 2.77E-29 | 58.25461099 |
| ENSG00000124813 | protein_coding | RUNX2    | 1.165052099  | 1.610069227 | 12.35292855  | 2.66E-30 | 3.97E-29 | 57.89232194 |
| ENSG00000156510 | protein_coding | HKDC1    | -1.274033961 | 1.188691822 | -12.32391305 | 3.48E-30 | 5.15E-29 | 57.62671234 |
| ENSG00000136048 | protein_coding | DRAM1    | 1.236998096  | 2.992031322 | 12.32165134  | 3.55E-30 | 5.24E-29 | 57.60602123 |
| ENSG00000135636 | protein_coding | DYSF     | 1.018776654  | 2.720330286 | 12.31200279  | 3.88E-30 | 5.71E-29 | 57.51777276 |
| ENSG00000099864 | protein_coding | PALM     | 1.546573318  | 3.62928855  | 12.30518617  | 4.13E-30 | 6.07E-29 | 57.45544619 |
| ENSG00000109861 | protein_coding | CTSC     | 1.786373678  | 4.34046043  | 12.27515435  | 5.45E-30 | 7.95E-29 | 57.18105553 |
| ENSG00000175793 | protein_coding | SFN      | 2.83861844   | 3.579317574 | 12.26671111  | 5.89E-30 | 8.56E-29 | 57.10397145 |
| ENSG00000179593 | protein_coding | ALOX15B  | 2.399632948  | 3.435102047 | 12.24416624  | 7.24E-30 | 1.05E-28 | 56.8982709  |
| ENSG00000105270 | protein_coding | CLIP3    | 1.388160796  | 2.640721805 | 12.24251674  | 7.35E-30 | 1.06E-28 | 56.883228   |
| ENSG00000135437 | protein_coding | RDH5     | 1.199189877  | 1.401957546 | 12.23341547  | 8.00E-30 | 1.15E-28 | 56.80024554 |
| ENSG00000168785 | protein_coding | TSPAN5   | -1.014189301 | 2.071607931 | -12.2298961  | 8.26E-30 | 1.19E-28 | 56.76816513 |
| ENSG00000186510 | protein_coding | CLCNKA   | -1.423357503 | 0.774170052 | -12.22911492 | 8.32E-30 | 1.19E-28 | 56.76104497 |
| ENSG00000146070 | protein_coding | PLA2G7   | -1.461312086 | 2.817413631 | -12.2290245  | 8.33E-30 | 1.19E-28 | 56.76022086 |
| ENSG00000066468 | protein_coding | FGFR2    | -1.19066608  | 3.178614738 | -12.21249438 | 9.69E-30 | 1.38E-28 | 56.60960862 |
| ENSG00000167107 | protein_coding | ACSF2    | -1.019535463 | 3.545216274 | -12.20015294 | 1.09E-29 | 1.54E-28 | 56.4972263  |
| ENSG00000131771 | protein_coding | PPP1R1B  | 1.583929493  | 1.499212286 | 12.17778271  | 1.33E-29 | 1.88E-28 | 56.29366373 |
| ENSG00000054690 | protein_coding | PLEKHH1  | -1.333580277 | 3.163406185 | -12.16982352 | 1.43E-29 | 2.01E-28 | 56.22128188 |
| ENSG00000115641 | protein_coding | FHL2     | -1.187449178 | 1.819902539 | -12.16684497 | 1.47E-29 | 2.07E-28 | 56.19420064 |
| ENSG00000196639 | protein_coding | HRH1     | 1.264531581  | 1.592698689 | 12.15483845  | 1.64E-29 | 2.30E-28 | 56.08506941 |
| ENSG00000174950 | protein_coding | CD164L2  | 1.323532378  | 1.378950701 | 12.15409624  | 1.66E-29 | 2.31E-28 | 56.07832502 |
| ENSG00000135604 | protein_coding | STX11    | -1.182998496 | 2.014550283 | -12.14394292 | 1.82E-29 | 2.53E-28 | 55.98608264 |
| ENSG00000187730 | protein_coding | GABRD    | 1.455878137  | 1.741977879 | 12.132034    | 2.03E-29 | 2.81E-28 | 55.87793946 |
| ENSG00000188536 | protein_coding | HBA2     | -2.139893515 | 3.081618382 | -12.1177386  | 2.31E-29 | 3.19E-28 | 55.74819461 |
| ENSG00000167617 | protein_coding | CDC42EP5 | 1.405747625  | 3.308575313 | 12.09615063  | 2.81E-29 | 3.87E-28 | 55.55240705 |
| ENSG00000183317 | protein_coding | EPHA10   | 1.07045685   | 1.030872429 | 12.0722258   | 3.50E-29 | 4.80E-28 | 55.33562936 |
| ENSG00000175556 | protein_coding | LONRF3   | -1.146517259 | 1.659673578 | -12.07207085 | 3.50E-29 | 4.80E-28 | 55.33422609 |
| ENSG00000106992 | protein_coding | AK1      | 1.118451557  | 3.707654591 | 12.06444699  | 3.76E-29 | 5.14E-28 | 55.26519351 |
| ENSG00000135046 | protein_coding | ANXA1    | 1.663992595  | 7.786841156 | 12.05573351  | 4.07E-29 | 5.55E-28 | 55.18632145 |
| ENSG00000183844 | protein_coding | FAM3B    | -1.053519248 | 0.995374077 | -12.04234422 | 4.60E-29 | 6.23E-28 | 55.06518093 |
| ENSG00000101098 | protein_coding | RIMS4    | -1.397859598 | 1.204588506 | -12.0393244  | 4.72E-29 | 6.38E-28 | 55.03786823 |
| ENSG00000108950 | protein_coding | FAM20A   | 2.11813589   | 3.586819566 | 12.02889136  | 5.20E-29 | 6.99E-28 | 54.94353335 |
| ENSG00000177606 | protein_coding | JUN      | -1.840425629 | 6.660157298 | -12.02281967 | 5.49E-29 | 7.38E-28 | 54.88865241 |
| ENSG00000109846 | protein_coding | CRYAB    | -1.711599123 | 5.413588873 | -12.00248929 | 6.61E-29 | 8.84E-28 | 54.70499156 |
| ENSG00000133048 | protein_coding | CHI3L1   | 3.833857637  | 5.203782527 | 12.00062382  | 6.72E-29 | 8.99E-28 | 54.68814716 |
| ENSG00000170624 | protein_coding | SGCD     | -1.364869754 | 1.22015834  | -11.98707136 | 7.60E-29 | 1.01E-27 | 54.56581352 |
| ENSG00000125144 | protein_coding | MT1G     | -4.383313342 | 4.951995949 | -11.97818833 | 8.24E-29 | 1.09E-27 | 54.48566726 |
| ENSG00000065361 | protein_coding | ERBB3    | 1.436833733  | 3.260955714 | 11.97540554  | 8.46E-29 | 1.12E-27 | 54.46056601 |
| ENSG00000128268 | protein_coding | MGAT3    | 2.094151575  | 2.616186975 | 11.96743536  | 9.09E-29 | 1.20E-27 | 54.38868997 |
| ENSG00000106688 | protein_coding | SLC1A1   | -1.506907347 | 2.755255657 | -11.96449178 | 9.34E-29 | 1.23E-27 | 54.36215057 |
| ENSG00000142669 | protein_coding | SH3BGRL3 | 1.097863374  | 6.524589751 | 11.94869655  | 1.08E-28 | 1.42E-27 | 54.21979669 |
| ENSG00000164400 | protein_coding | CSF2     | 1.261048679  | 1.145261038 | 11.9486122   | 1.08E-28 | 1.42E-27 | 54.21903678 |
| ENSG00000160888 | protein_coding | IER2     | -1.57387415  | 5.708321022 | -11.94071572 | 1.16E-28 | 1.52E-27 | 54.14790617 |
| ENSG00000050344 | protein_coding | NFE2L3   | 1.914812112  | 2.936323457 | 11.93553276  | 1.21E-28 | 1.59E-27 | 54.10123171 |
| ENSG00000181035 | protein_coding | SLC25A42 | -1.021631207 | 3.301664468 | -11.93145539 | 1.26E-28 | 1.65E-27 | 54.0645207  |
| ENSG00000183508 | protein_coding | FAM46C   | -1.11714212  | 3.075164914 | -11.90869236 | 1.55E-28 | 2.02E-27 | 53.85968897 |
| ENSG00000160678 | protein_coding | S100A1   | 1.71753747   | 6.509966594 | 11.90391123  | 1.62E-28 | 2.10E-27 | 53.81669165 |
| ENSG00000175084 | protein_coding | DES      | -1.841266369 | 1.200819967 | -11.89684336 | 1.73E-28 | 2.24E-27 | 53.75314562 |
| ENSG00000146072 | protein_coding | TNFRSF21 | 1.556511725  | 3.391254665 | 11.8902668   | 1.83E-28 | 2.37E-27 | 53.69403413 |
| ENSG00000185532 | protein_coding | PRKG1    | -1.018846919 | 1.266965881 | -11.8791559  | 2.03E-28 | 2.61E-27 | 53.5942051  |
| ENSG00000169439 | protein_coding | SDC2     | -1.151774327 | 6.39250242  | -11.87480111 | 2.11E-28 | 2.71E-27 | 53.55509134 |
| ENSG00000128165 | protein_coding | ADM2     | -1.6113723   | 2.202262763 | -11.870193   | 2.20E-28 | 2.82E-27 | 53.51371022 |
| ENSG00000187513 | protein_coding | GJA4     | 1.516505675  | 4.678948393 | 11.86880846  | 2.22E-28 | 2.86E-27 | 53.50127865 |
| ENSG00000134107 | protein_coding | BHLHE40  | 1.622272231  | 6.140067406 | 11.86763191  | 2.25E-28 | 2.89E-27 | 53.49071515 |
| ENSG00000150893 | protein_coding | FREM2    | -1.036723561 | 1.346121686 | -11.85344475 | 2.56E-28 | 3.26E-27 | 53.36337966 |
| ENSG00000121742 | protein_coding | GJB6     | -1.290012573 | 1.227504574 | -11.8314961  | 3.12E-28 | 3.97E-27 | 53.16653607 |
| ENSG00000178445 | protein_coding | GLDC     | -1.44222994  | 0.646005725 | -11.82623603 | 3.27E-28 | 4.15E-27 | 53.11938973 |
| ENSG00000160932 | protein_coding | LY6E     | 1.747286078  | 5.904581213 | 11.82287185  | 3.37E-28 | 4.27E-27 | 53.08924211 |
| ENSG00000105011 | protein_coding | ASF1B    | 1.02294825   | 1.893558126 | 11.81986085  | 3.46E-28 | 4.38E-27 | 53.06226315 |
| ENSG00000138166 | protein_coding | DUSP5    | 2.24484231   | 5.519483219 | 11.80242221  | 4.05E-28 | 5.11E-27 | 52.90608054 |
| ENSG00000167767 | protein_coding | KRT80    | 1.674975321  | 2.549292614 | 11.75167643  | 6.41E-28 | 7.94E-27 | 52.45227534 |
| ENSG00000127951 | protein_coding | FGL2     | -1.426074232 | 2.614566042 | -11.72167362 | 8.39E-28 | 1.02E-26 | 52.18444732 |
| ENSG00000088882 | protein_coding | CPXM1    | -2.269275141 | 2.673015195 | -11.71727472 | 8.73E-28 | 1.06E-26 | 52.14520941 |
| ENSG00000119138 | protein_coding | KLF9     | -1.061584404 | 3.755903805 | -11.71669359 | 8.78E-28 | 1.07E-26 | 52.1400264  |
| ENSG00000171345 | protein_coding | KRT19    | 2.435208792  | 6.485728812 | 11.71337964  | 9.04E-28 | 1.10E-26 | 52.11047201 |
| ENSG00000165617 | protein_coding | DACT1    | -1.077779507 | 1.516235059 | -11.69578147 | 1.06E-27 | 1.28E-26 | 51.9536019  |
| ENSG00000165092 | protein_coding | ALDH1A1  | -1.875823194 | 5.508539605 | -11.68469585 | 1.17E-27 | 1.41E-26 | 51.85484811 |
| ENSG00000164176 | protein_coding | EDIL3    | 1.085647001  | 1.779247811 | 11.67229308  | 1.31E-27 | 1.56E-26 | 51.74441902 |
| ENSG00000138061 | protein_coding | CYP1B1   | 2.339850219  | 3.440388669 | 11.6589458   | 1.47E-27 | 1.75E-26 | 51.62564925 |
| ENSG00000185567 | protein_coding | AHNAK2   | 1.752962499  | 1.960213001 | 11.65849332  | 1.48E-27 | 1.76E-26 | 51.62162413 |
| ENSG00000101460 | protein_coding | MAP1LC3A | -1.069605671 | 3.281993722 | -11.64954826 | 1.60E-27 | 1.90E-26 | 51.54206887 |
| ENSG00000187823 | protein_coding | ZCCHC16  | 1.840694395  | 1.706936908 | 11.62733504  | 1.96E-27 | 2.30E-26 | 51.34464896 |
| ENSG00000133026 | protein_coding | MYH10    | 1.199224188  | 4.515734065 | 11.5908045   | 2.71E-27 | 3.17E-26 | 51.02041717 |



|                 |                |          |              |             |              |          |          |             |
|-----------------|----------------|----------|--------------|-------------|--------------|----------|----------|-------------|
| ENSG00000148346 | protein_coding | LCN2     | 3.086199076  | 3.60320969  | 11.58744342  | 2.80E-27 | 3.26E-26 | 50.99061265 |
| ENSG00000113396 | protein_coding | SLC27A6  | 2.694228126  | 3.520395984 | 11.56968067  | 3.28E-27 | 3.79E-26 | 50.83317676 |
| ENSG00000057657 | protein_coding | PRDM1    | 1.447146598  | 3.829347354 | 11.55130764  | 3.86E-27 | 4.46E-26 | 50.670467   |
| ENSG00000011465 | protein_coding | DCN      | -2.292669647 | 2.913069401 | -11.54909489 | 3.94E-27 | 4.54E-26 | 50.6508804  |
| ENSG00000122877 | protein_coding | EGR2     | -2.281750209 | 3.862717531 | -11.54453612 | 4.10E-27 | 4.72E-26 | 50.61053382 |
| ENSG00000176971 | protein_coding | FIBIN    | -1.667046528 | 1.570028254 | -11.54028411 | 4.26E-27 | 4.89E-26 | 50.57290982 |
| ENSG00000238243 | protein_coding | OR2W3    | -1.181142184 | 1.524910636 | -11.53030171 | 4.66E-27 | 5.33E-26 | 50.48460951 |
| ENSG00000184164 | protein_coding | CRELD2   | -1.13862482  | 3.228248555 | -11.50036445 | 6.09E-27 | 6.89E-26 | 50.22004138 |
| ENSG00000163638 | protein_coding | ADAMTS9  | 1.642673869  | 2.509944414 | 11.49690063  | 6.28E-27 | 7.10E-26 | 50.18945398 |
| ENSG00000175445 | protein_coding | LPL      | 1.607652817  | 2.713621894 | 11.45860049  | 8.83E-27 | 9.89E-26 | 49.85157264 |
| ENSG00000005243 | protein_coding | COPZ2    | -1.079131589 | 2.892329979 | -11.44757352 | 9.73E-27 | 1.09E-25 | 49.75440598 |
| ENSG00000144681 | protein_coding | STAC     | 1.068283168  | 1.154622215 | 11.44341702  | 1.01E-26 | 1.13E-25 | 49.71779317 |
| ENSG00000132470 | protein_coding | ITGB4    | 1.581256529  | 3.756904256 | 11.4358206   | 1.08E-26 | 1.20E-25 | 49.65089799 |
| ENSG00000197594 | protein_coding | ENPP1    | -1.583013775 | 2.923547972 | -11.43432022 | 1.10E-26 | 1.22E-25 | 49.63768831 |
| ENSG00000171766 | protein_coding | GATM     | -1.416841638 | 2.32388756  | -11.43115841 | 1.13E-26 | 1.25E-25 | 49.60985401 |
| ENSG00000166816 | protein_coding | LDHD     | -1.360605006 | 2.280298577 | -11.41160585 | 1.34E-26 | 1.48E-25 | 49.43781994 |
| ENSG00000127083 | protein_coding | OMD      | -1.435373403 | 1.087184888 | -11.34802943 | 2.35E-26 | 2.55E-25 | 48.87954541 |
| ENSG00000058085 | protein_coding | LAMC2    | 1.170492873  | 5.018490194 | 11.34480366  | 2.42E-26 | 2.62E-25 | 48.85126469 |
| ENSG00000063180 | protein_coding | CA11     | 1.099874196  | 4.511143614 | 11.34110493  | 2.50E-26 | 2.70E-25 | 48.81884287 |
| ENSG00000188549 | protein_coding | C15orf52 | -1.073918584 | 2.329058104 | -11.31504557 | 3.15E-26 | 3.37E-25 | 48.59057923 |
| ENSG00000173846 | protein_coding | PLK3     | 1.030381954  | 3.306215278 | 11.31196877  | 3.24E-26 | 3.46E-25 | 48.56364729 |
| ENSG00000167434 | protein_coding | CA4      | -1.994834319 | 1.682031379 | -11.310626   | 3.27E-26 | 3.50E-25 | 48.55189499 |
| ENSG00000143416 | protein_coding | SELENBP1 | -1.216442138 | 5.630229829 | -11.30099151 | 3.57E-26 | 3.81E-25 | 48.46759377 |
| ENSG00000144485 | protein_coding | HES6     | 1.465289959  | 2.529857805 | 11.29415074  | 3.79E-26 | 4.03E-25 | 48.40776129 |
| ENSG00000134873 | protein_coding | CLDN10   | 2.150299484  | 1.960502924 | 11.2650038   | 4.90E-26 | 5.16E-25 | 48.15305223 |
| ENSG00000133794 | protein_coding | ARNTL    | 1.494649093  | 3.299097919 | 11.25862096  | 5.18E-26 | 5.45E-25 | 48.09732232 |
| ENSG00000149428 | protein_coding | HYOU1    | -1.19722636  | 4.433604346 | -11.23158734 | 6.57E-26 | 6.86E-25 | 47.86147916 |
| ENSG00000168878 | protein_coding | SFTPBP   | 4.059366273  | 6.213096385 | 11.23130119  | 6.59E-26 | 6.88E-25 | 47.85898442 |
| ENSG00000136883 | protein_coding | KIF12    | -1.22862369  | 2.80481505  | -11.20861438 | 8.04E-26 | 8.35E-25 | 47.6613079  |
| ENSG00000189377 | protein_coding | CXCL17   | 2.461090483  | 2.826482661 | 11.20649274  | 8.19E-26 | 8.49E-25 | 47.64283272 |
| ENSG00000077942 | protein_coding | FBLN1    | -2.101348847 | 2.680167248 | -11.20451577 | 8.34E-26 | 8.63E-25 | 47.62561916 |
| ENSG00000159239 | protein_coding | C2orf81  | 1.041594921  | 2.712376491 | 11.1902803   | 9.45E-26 | 9.75E-25 | 47.50171975 |
| ENSG00000186205 | protein_coding | MARC1    | -1.097452894 | 2.464219004 | -11.18617695 | 9.79E-26 | 1.01E-24 | 47.46602222 |
| ENSG00000149212 | protein_coding | SESN3    | -1.004542192 | 3.012195805 | -11.16995173 | 1.13E-25 | 1.16E-24 | 47.3249404  |
| ENSG00000006042 | protein_coding | TMEM98   | 1.187155983  | 4.784180204 | 11.16337602  | 1.20E-25 | 1.23E-24 | 47.26779566 |
| ENSG00000176387 | protein_coding | HSD11B2  | -1.42945989  | 1.704232084 | -11.14572616 | 1.40E-25 | 1.43E-24 | 47.11450609 |
| ENSG00000148926 | protein_coding | ADM      | 1.599211473  | 3.462717984 | 11.14185154  | 1.44E-25 | 1.47E-24 | 47.08087304 |
| ENSG00000163879 | protein_coding | DNALI1   | -1.27989721  | 2.637860498 | -11.12779411 | 1.63E-25 | 1.66E-24 | 46.95890447 |
| ENSG00000113532 | protein_coding | ST8SIA4  | 1.001212164  | 1.893361049 | 11.11761274  | 1.79E-25 | 1.81E-24 | 46.87062011 |
| ENSG00000134013 | protein_coding | LOXL2    | 1.039849741  | 1.898033122 | 11.11427552  | 1.84E-25 | 1.86E-24 | 46.84169232 |
| ENSG00000137033 | protein_coding | IL33     | -1.114656521 | 1.743323589 | -11.09840245 | 2.11E-25 | 2.13E-24 | 46.70416772 |
| ENSG00000166922 | protein_coding | SCG5     | 1.838563549  | 3.90237468  | 11.09382456  | 2.20E-25 | 2.22E-24 | 46.66452528 |
| ENSG00000163435 | protein_coding | ELF3     | 1.559096797  | 2.743909001 | 11.08496963  | 2.38E-25 | 2.39E-24 | 46.5878717  |
| ENSG00000101955 | protein_coding | SRPX     | -1.33606086  | 2.145958162 | -11.0544842  | 3.10E-25 | 3.10E-24 | 46.32423473 |
| ENSG00000070404 | protein_coding | FSTL3    | 1.424299344  | 3.784708684 | 11.05163396  | 3.18E-25 | 3.18E-24 | 46.29960683 |
| ENSG00000140263 | protein_coding | SORD     | -1.402013025 | 4.802193954 | -11.01482556 | 4.38E-25 | 4.34E-24 | 45.98188146 |
| ENSG00000111275 | protein_coding | ALDH2    | -1.02769749  | 3.209883329 | -11.01336837 | 4.44E-25 | 4.39E-24 | 45.96931545 |
| ENSG00000034510 | protein_coding | TMSB10   | 1.287979944  | 10.60136929 | 11.00594616  | 4.73E-25 | 4.67E-24 | 45.90532539 |
| ENSG00000111348 | protein_coding | ARHGDI1B | 1.160428439  | 6.392463155 | 10.9922741   | 5.33E-25 | 5.24E-24 | 45.78751657 |
| ENSG00000101282 | protein_coding | RSPO4    | 1.638327399  | 2.533037937 | 10.98996988  | 5.44E-25 | 5.34E-24 | 45.7676699  |
| ENSG00000143839 | protein_coding | REN      | 1.083357165  | 0.99659284  | 10.95255149  | 7.52E-25 | 7.33E-24 | 45.44570887 |
| ENSG00000171885 | protein_coding | AQP4     | -1.542832746 | 1.654841284 | -10.94172421 | 8.26E-25 | 8.04E-24 | 45.35266388 |
| ENSG00000117122 | protein_coding | MFAP2    | 1.475829613  | 2.474816641 | 10.93000519  | 9.15E-25 | 8.87E-24 | 45.25201483 |
| ENSG00000175906 | protein_coding | ARL4D    | -1.070989134 | 4.818670427 | -10.92673597 | 9.41E-25 | 9.12E-24 | 45.2239481  |
| ENSG00000167644 | protein_coding | C19orf33 | 2.262265971  | 5.110800201 | 10.91472993  | 1.04E-24 | 1.01E-23 | 45.12091551 |
| ENSG00000196352 | protein_coding | CD55     | 2.04315058   | 5.71667437  | 10.87109926  | 1.52E-24 | 1.46E-23 | 44.74703598 |
| ENSG00000164326 | protein_coding | CARTPT   | -2.198593589 | 0.966764182 | -10.8672647  | 1.57E-24 | 1.50E-23 | 44.71421798 |
| ENSG00000142871 | protein_coding | CYR61    | -1.957129373 | 6.447451597 | -10.83768938 | 2.03E-24 | 1.92E-23 | 44.46132273 |
| ENSG00000179403 | protein_coding | VWA1     | 1.082612518  | 4.168473004 | 10.8119452   | 2.54E-24 | 2.38E-23 | 44.24151101 |
| ENSG00000105281 | protein_coding | SLC1A5   | 1.48327014   | 3.267386852 | 10.80299705  | 2.74E-24 | 2.57E-23 | 44.1651798  |
| ENSG00000114529 | protein_coding | C3orf52  | -1.000535217 | 1.805425765 | -10.77571789 | 3.47E-24 | 3.23E-23 | 43.9327041  |
| ENSG00000175315 | protein_coding | CST6     | 2.926676062  | 6.216581794 | 10.76740358  | 3.72E-24 | 3.47E-23 | 43.86191657 |
| ENSG00000152611 | protein_coding | CAPSL    | -1.268259641 | 0.942784584 | -10.75992812 | 3.97E-24 | 3.69E-23 | 43.7982981  |
| ENSG00000111885 | protein_coding | MAN1A1   | -1.059442436 | 2.804234493 | -10.74110308 | 4.67E-24 | 4.31E-23 | 43.63820524 |
| ENSG00000167900 | protein_coding | TK1      | 1.118229965  | 2.463407078 | 10.7261911   | 5.30E-24 | 4.89E-23 | 43.51150605 |
| ENSG00000184254 | protein_coding | ALDH1A3  | 1.386522832  | 1.798457318 | 10.72535309  | 5.34E-24 | 4.93E-23 | 43.50438893 |
| ENSG00000167693 | protein_coding | NXN      | 1.096838956  | 3.330273848 | 10.7134203   | 5.92E-24 | 5.42E-23 | 43.40308108 |
| ENSG00000120708 | protein_coding | TGFBI    | 1.429703997  | 3.443994278 | 10.70895181  | 6.15E-24 | 5.62E-23 | 43.36516111 |
| ENSG00000105559 | protein_coding | PLEKHA4  | 1.341553266  | 4.698234689 | 10.69688369  | 6.82E-24 | 6.21E-23 | 43.26279636 |
| ENSG00000127955 | protein_coding | GNAI1    | -1.016680105 | 2.327225742 | -10.67188379 | 8.44E-24 | 7.64E-23 | 43.05095641 |
| ENSG00000102109 | protein_coding | PCSK1N   | 2.550856559  | 2.771963944 | 10.66895809  | 8.66E-24 | 7.82E-23 | 43.02618409 |
| ENSG00000185650 | protein_coding | ZFP36L1  | 1.123438081  | 7.161134378 | 10.66077177  | 9.28E-24 | 8.37E-23 | 42.95689064 |
| ENSG00000117318 | protein_coding | ID3      | -1.348626104 | 6.008957656 | -10.65326217 | 9.90E-24 | 8.92E-23 | 42.89335287 |

|                 |                |            |              |             |              |          |          |             |
|-----------------|----------------|------------|--------------|-------------|--------------|----------|----------|-------------|
| ENSG00000100097 | protein_coding | LGALS1     | 1.500166655  | 7.045000242 | 10.64359387  | 1.07E-23 | 9.67E-23 | 42.81158931 |
| ENSG00000164379 | protein_coding | FOXQ1      | 1.821402319  | 4.05657536  | 10.62208829  | 1.29E-23 | 1.15E-22 | 42.62987652 |
| ENSG00000116962 | protein_coding | NID1       | 1.064960843  | 3.254988974 | 10.60874842  | 1.45E-23 | 1.29E-22 | 42.51726943 |
| ENSG00000168497 | protein_coding | SDPR       | -1.724050132 | 4.242467909 | -10.58734298 | 1.74E-23 | 1.54E-22 | 42.3367527  |
| ENSG00000112559 | protein_coding | MDF1       | 1.423021481  | 1.976954508 | 10.5654227   | 2.09E-23 | 1.84E-22 | 42.15211814 |
| ENSG00000205542 | protein_coding | TMSB4X     | 1.330402631  | 9.058810636 | 10.56451068  | 2.11E-23 | 1.85E-22 | 42.14444114 |
| ENSG00000132821 | protein_coding | VSTM2L     | 1.60420544   | 2.473740016 | 10.56048286  | 2.18E-23 | 1.92E-22 | 42.11054124 |
| ENSG00000116983 | protein_coding | HPCAL4     | 1.727979368  | 1.655157288 | 10.53731091  | 2.66E-23 | 2.33E-22 | 41.91566542 |
| ENSG00000035664 | protein_coding | DAPK2      | 1.51962562   | 4.651075305 | 10.51761463  | 3.14E-23 | 2.74E-22 | 41.75022048 |
| ENSG00000058335 | protein_coding | RASGRF1    | 1.088947333  | 1.032546308 | 10.51232392  | 3.28E-23 | 2.86E-22 | 41.70581096 |
| ENSG00000109762 | protein_coding | SNX25      | 1.044865457  | 3.858190714 | 10.50132153  | 3.60E-23 | 3.12E-22 | 41.61350119 |
| ENSG00000181218 | protein_coding | HIST3H2A   | 1.555369212  | 2.039377576 | 10.50044646  | 3.63E-23 | 3.14E-22 | 41.6061618  |
| ENSG00000106780 | protein_coding | MEGF9      | 1.120347793  | 4.703801857 | 10.49772958  | 3.72E-23 | 3.21E-22 | 41.58337731 |
| ENSG00000077274 | protein_coding | CAPN6      | -1.089970651 | 0.760691692 | -10.49712484 | 3.73E-23 | 3.23E-22 | 41.57830628 |
| ENSG00000163131 | protein_coding | CTSS       | 1.327896567  | 4.825471753 | 10.49103757  | 3.93E-23 | 3.39E-22 | 41.52727123 |
| ENSG00000152128 | protein_coding | TMEM163    | 1.690834666  | 1.817426215 | 10.48999104  | 3.97E-23 | 3.41E-22 | 41.51849907 |
| ENSG00000101230 | protein_coding | ISM1       | -1.697459047 | 3.544041115 | -10.47240862 | 4.60E-23 | 3.94E-22 | 41.3711983  |
| ENSG00000170500 | protein_coding | LONRF2     | 1.539858851  | 3.558803537 | 10.41903768  | 7.23E-23 | 6.09E-22 | 40.92498033 |
| ENSG00000078596 | protein_coding | ITM2A      | -1.19430923  | 4.399942208 | -10.41106657 | 7.73E-23 | 6.49E-22 | 40.85845418 |
| ENSG00000176907 | protein_coding | C8orf4     | 2.143923104  | 5.23266265  | 10.39495275  | 8.85E-23 | 7.39E-22 | 40.72406357 |
| ENSG00000102804 | protein_coding | TSC22D1    | 1.546797746  | 6.155078    | 10.39138618  | 9.12E-23 | 7.58E-22 | 40.6943351  |
| ENSG00000147256 | protein_coding | ARHGAP36   | 3.610084819  | 3.294425989 | 10.38962859  | 9.26E-23 | 7.69E-22 | 40.67968726 |
| ENSG00000187017 | protein_coding | ESPN       | 1.314154953  | 1.203956305 | 10.38389081  | 9.72E-23 | 8.05E-22 | 40.63187891 |
| ENSG00000167105 | protein_coding | TMEM92     | 1.262151534  | 1.129841767 | 10.38153299  | 9.91E-23 | 8.21E-22 | 40.61223769 |
| ENSG00000169604 | protein_coding | ANTXR1     | -1.119696114 | 3.518794331 | -10.3704194  | 1.09E-22 | 8.99E-22 | 40.51969518 |
| ENSG00000163171 | protein_coding | CDC42EP3   | 1.161169856  | 2.706492683 | 10.33905248  | 1.42E-22 | 1.16E-21 | 40.25882798 |
| ENSG00000111962 | protein_coding | UST        | -1.104455314 | 3.80094245  | -10.32936253 | 1.54E-22 | 1.26E-21 | 40.17833724 |
| ENSG00000064655 | protein_coding | EYA2       | -1.185368061 | 2.493060677 | -10.32297163 | 1.62E-22 | 1.32E-21 | 40.12527566 |
| ENSG00000198959 | protein_coding | TGM2       | 1.548684561  | 3.904342013 | 10.31381534  | 1.75E-22 | 1.42E-21 | 40.04928871 |
| ENSG00000088881 | protein_coding | EBF4       | -1.612575144 | 2.505432812 | -10.30127229 | 1.94E-22 | 1.58E-21 | 39.94526215 |
| ENSG00000131016 | protein_coding | AKAP12     | -1.291600308 | 2.659230641 | -10.29792382 | 2.00E-22 | 1.62E-21 | 39.91750447 |
| ENSG00000164733 | protein_coding | CTSB       | 1.017163845  | 10.1998679  | 10.2759108   | 2.40E-22 | 1.94E-21 | 39.73516125 |
| ENSG00000141934 | protein_coding | PPAP2C     | 1.236054543  | 2.155100977 | 10.27134625  | 2.50E-22 | 2.01E-21 | 39.69738095 |
| ENSG00000143845 | protein_coding | ETNK2      | 1.178107622  | 3.42755686  | 10.26323144  | 2.67E-22 | 2.14E-21 | 39.63024103 |
| ENSG00000168447 | protein_coding | SCNN1B     | -1.032410025 | 1.57336626  | -10.25507172 | 2.86E-22 | 2.29E-21 | 39.56276218 |
| ENSG00000163083 | protein_coding | INHBB      | 1.565530557  | 5.126449134 | 10.23718321  | 3.32E-22 | 2.65E-21 | 39.41494404 |
| ENSG00000105664 | protein_coding | COMP       | 2.478019695  | 2.831469607 | 10.2365028   | 3.34E-22 | 2.66E-21 | 39.40932468 |
| ENSG00000187122 | protein_coding | SLIT1      | 2.216220063  | 2.115114654 | 10.21811205  | 3.89E-22 | 3.10E-21 | 39.25752779 |
| ENSG00000042832 | protein_coding | TG         | -1.989929894 | 10.96871907 | -10.20773253 | 4.25E-22 | 3.37E-21 | 39.17192957 |
| ENSG00000099194 | protein_coding | SCD        | 1.205058025  | 2.429318274 | 10.20367195  | 4.39E-22 | 3.49E-21 | 39.13845717 |
| ENSG00000091490 | protein_coding | SEL1L3     | 1.360117395  | 4.013369109 | 10.19621275  | 4.67E-22 | 3.69E-21 | 39.07699049 |
| ENSG00000068650 | protein_coding | ATP11A     | 1.235825774  | 3.834797555 | 10.17818855  | 5.43E-22 | 4.27E-21 | 38.92857862 |
| ENSG00000243449 | protein_coding | C4orf48    | 1.694600521  | 3.151223778 | 10.16344571  | 6.14E-22 | 4.81E-21 | 38.80730611 |
| ENSG00000172348 | protein_coding | RCAN2      | -1.085238141 | 2.461129242 | -10.15937666 | 6.35E-22 | 4.97E-21 | 38.77385385 |
| ENSG00000117069 | protein_coding | ST6GALNAC5 | 1.722553231  | 1.617512561 | 10.12703543  | 8.30E-22 | 6.45E-21 | 38.50826681 |
| ENSG00000099812 | protein_coding | MISP       | 1.463965894  | 1.607168743 | 10.0960079   | 1.07E-21 | 8.22E-21 | 38.25396224 |
| ENSG00000167183 | protein_coding | PRR15L     | -1.509528269 | 4.579812313 | -10.08120711 | 1.21E-21 | 9.27E-21 | 38.13282467 |
| ENSG00000139055 | protein_coding | ERP27      | 1.542226466  | 3.129428194 | 10.04602295  | 1.62E-21 | 1.23E-20 | 37.84530394 |
| ENSG00000125740 | protein_coding | FOSB       | -2.967326626 | 4.576211157 | -10.04453029 | 1.64E-21 | 1.24E-20 | 37.83312004 |
| ENSG00000124205 | protein_coding | EDN3       | -2.275416696 | 1.869405122 | -10.0427489  | 1.67E-21 | 1.26E-20 | 37.81858075 |
| ENSG00000156103 | protein_coding | MMP16      | 1.007492087  | 1.170832049 | 10.02786928  | 1.89E-21 | 1.42E-20 | 37.69720028 |
| ENSG00000009765 | protein_coding | IYD        | -2.191151417 | 5.495095424 | -10.02094193 | 2.00E-21 | 1.50E-20 | 37.64072894 |
| ENSG00000174939 | protein_coding | ASPHD1     | 1.018530509  | 1.019358809 | 9.987784327  | 2.62E-21 | 1.96E-20 | 37.3707693  |
| ENSG00000128849 | protein_coding | CGNL1      | -1.371218862 | 3.249227023 | -9.976382461 | 2.88E-21 | 2.14E-20 | 37.27806862 |
| ENSG00000185739 | protein_coding | SRL        | 1.087243327  | 2.480639187 | 9.975735111  | 2.89E-21 | 2.15E-20 | 37.27280746 |
| ENSG00000012779 | protein_coding | ALOX5      | 2.354052056  | 3.631815095 | 9.973645318  | 2.95E-21 | 2.19E-20 | 37.25582473 |
| ENSG00000105707 | protein_coding | HPN        | 1.570496687  | 4.514001523 | 9.934699538  | 4.05E-21 | 2.98E-20 | 36.93974205 |
| ENSG00000107742 | protein_coding | SPOCK2     | 2.196711116  | 4.924424581 | 9.92975098   | 4.22E-21 | 3.10E-20 | 36.89963567 |
| ENSG00000136928 | protein_coding | GABBR2     | 1.732856389  | 3.003415841 | 9.923593871  | 4.44E-21 | 3.25E-20 | 36.84975204 |
| ENSG00000131097 | protein_coding | HIGD1B     | 1.11879423   | 1.789401075 | 9.919041114  | 4.61E-21 | 3.37E-20 | 36.81287914 |
| ENSG00000171033 | protein_coding | PKIA       | -1.186833497 | 3.153681955 | -9.907144149 | 5.08E-21 | 3.70E-20 | 36.7165759  |
| ENSG00000161682 | protein_coding | FAM171A2   | 1.01836567   | 2.075957395 | 9.897928402  | 5.48E-21 | 3.98E-20 | 36.64202689 |
| ENSG00000181104 | protein_coding | F2R        | 1.050171461  | 3.36513454  | 9.859173728  | 7.52E-21 | 5.42E-20 | 36.32901096 |
| ENSG00000197329 | protein_coding | PELI1      | 1.306215325  | 3.115884115 | 9.854886504  | 7.78E-21 | 5.61E-20 | 36.29443168 |
| ENSG00000123975 | protein_coding | CKS2       | 1.053817671  | 4.260848128 | 9.852227492  | 7.95E-21 | 5.73E-20 | 36.27298981 |
| ENSG00000147027 | protein_coding | TMEM47     | -1.051741326 | 2.638269855 | -9.849456821 | 8.14E-21 | 5.85E-20 | 36.25065146 |
| ENSG00000120738 | protein_coding | EGR1       | -1.813696609 | 7.476493612 | -9.844482604 | 8.47E-21 | 6.09E-20 | 36.21055723 |
| ENSG00000152377 | protein_coding | SPOCK1     | 1.539925379  | 2.555812994 | 9.815071135  | 1.08E-20 | 7.65E-20 | 35.97375301 |
| ENSG00000176046 | protein_coding | NUPR1      | -1.687360187 | 4.220452035 | -9.796791784 | 1.25E-20 | 8.83E-20 | 35.82680655 |
| ENSG00000163082 | protein_coding | SGPP2      | -1.234065484 | 2.993271952 | -9.792560639 | 1.29E-20 | 9.13E-20 | 35.79281767 |
| ENSG00000182795 | protein_coding | Clorf116   | 1.349826515  | 3.504555682 | 9.782066183  | 1.41E-20 | 9.91E-20 | 35.7085561  |
| ENSG00000124762 | protein_coding | CDKN1A     | 1.280406349  | 6.228100252 | 9.779258477  | 1.44E-20 | 1.01E-19 | 35.68602243 |
| ENSG00000181374 | protein_coding | CCL13      | 1.584973043  | 2.043330107 | 9.762202926  | 1.65E-20 | 1.16E-19 | 35.54922979 |

|                 |                |          |              |             |              |          |          |             |
|-----------------|----------------|----------|--------------|-------------|--------------|----------|----------|-------------|
| ENSG00000159200 | protein_coding | RCAN1    | -1.358712485 | 2.674734178 | -9.723008377 | 2.27E-20 | 1.58E-19 | 35.2354555  |
| ENSG00000142634 | protein_coding | EFHD2    | 1.021080251  | 6.245468164 | 9.686941997  | 3.04E-20 | 2.09E-19 | 34.9474438  |
| ENSG00000135063 | protein_coding | FAM189A2 | -1.069821541 | 4.364924916 | -9.672429207 | 3.42E-20 | 2.34E-19 | 34.83174589 |
| ENSG00000250479 | protein_coding | CHCHD10  | -1.110787959 | 4.471415503 | -9.670892751 | 3.46E-20 | 2.37E-19 | 34.81950363 |
| ENSG00000176788 | protein_coding | BASP1    | 1.264120618  | 4.912105785 | 9.668158555  | 3.54E-20 | 2.42E-19 | 34.79772108 |
| ENSG00000204544 | protein_coding | MUC21    | 1.907308421  | 1.741289652 | 9.65767064   | 3.85E-20 | 2.63E-19 | 34.71420394 |
| ENSG00000060656 | protein_coding | PTPRU    | 1.174782671  | 3.018965328 | 9.649600937  | 4.11E-20 | 2.80E-19 | 34.6499835  |
| ENSG00000166165 | protein_coding | CKB      | -1.160866213 | 5.493929032 | -9.646836259 | 4.20E-20 | 2.86E-19 | 34.62798962 |
| ENSG00000142627 | protein_coding | EPHA2    | 1.006787953  | 4.231313401 | 9.632323713  | 4.72E-20 | 3.21E-19 | 34.51260494 |
| ENSG00000135925 | protein_coding | WNT10A   | 1.330581674  | 1.555919207 | 9.592469515  | 6.50E-20 | 4.37E-19 | 34.19631885 |
| ENSG00000172508 | protein_coding | CARNS1   | 1.10607848   | 3.134489143 | 9.561585807  | 8.32E-20 | 5.58E-19 | 33.95181234 |
| ENSG00000180447 | protein_coding | GAS1     | -1.078304132 | 1.24724378  | -9.534459756 | 1.03E-19 | 6.86E-19 | 33.73748127 |
| ENSG00000078725 | protein_coding | BRINP1   | 1.170955431  | 1.33418334  | 9.533392829  | 1.04E-19 | 6.91E-19 | 33.72905932 |
| ENSG00000156535 | protein_coding | CD109    | 1.179982336  | 1.702365506 | 9.526308873  | 1.10E-19 | 7.30E-19 | 33.67315677 |
| ENSG00000197046 | protein_coding | SIGLEC15 | 1.007496833  | 1.027406537 | 9.522047122  | 1.14E-19 | 7.55E-19 | 33.63953861 |
| ENSG00000205362 | protein_coding | MT1A     | -1.189352758 | 1.237273036 | -9.50054572  | 1.35E-19 | 8.91E-19 | 33.47007898 |
| ENSG00000146555 | protein_coding | SDK1     | 1.25201281   | 1.538897353 | 9.490420514  | 1.47E-19 | 9.64E-19 | 33.39036625 |
| ENSG00000119630 | protein_coding | PGF      | -1.465713576 | 3.185218636 | -9.455681483 | 1.94E-19 | 1.26E-18 | 33.11730252 |
| ENSG00000102401 | protein_coding | ARMCX3   | 1.453098222  | 5.997286926 | 9.446755021  | 2.08E-19 | 1.35E-18 | 33.04724356 |
| ENSG00000189129 | protein_coding | PLAC9    | -1.153360122 | 2.294446958 | -9.446005748 | 2.09E-19 | 1.36E-18 | 33.04136491 |
| ENSG00000131094 | protein_coding | C1QL1    | 1.490759152  | 1.547491859 | 9.442892792  | 2.14E-19 | 1.39E-18 | 33.01694458 |
| ENSG00000175567 | protein_coding | UCP2     | 1.036838314  | 6.329084445 | 9.426955433  | 2.43E-19 | 1.57E-18 | 32.89200366 |
| ENSG00000106546 | protein_coding | AHR      | 1.025752533  | 4.268518406 | 9.425308634  | 2.46E-19 | 1.59E-18 | 32.87910155 |
| ENSG00000109255 | protein_coding | NMU      | 2.555910977  | 2.650029894 | 9.41476375   | 2.68E-19 | 1.72E-18 | 32.7965214  |
| ENSG00000123095 | protein_coding | BHLHE41  | 1.143421565  | 6.046282436 | 9.412315351  | 2.73E-19 | 1.76E-18 | 32.77735604 |
| ENSG00000118898 | protein_coding | PPL      | 1.152148806  | 5.279517318 | 9.371595328  | 3.77E-19 | 2.40E-18 | 32.45909713 |
| ENSG00000163141 | protein_coding | BNIP1    | 1.221004133  | 2.71000047  | 9.328190084  | 5.31E-19 | 3.34E-18 | 32.12086402 |
| ENSG00000128040 | protein_coding | SPINK2   | 1.007351172  | 1.490176753 | 9.320721759  | 5.63E-19 | 3.54E-18 | 32.06277328 |
| ENSG00000011422 | protein_coding | PLAUR    | 1.404788336  | 2.528090543 | 9.317070105  | 5.79E-19 | 3.63E-18 | 32.03438102 |
| ENSG00000167741 | protein_coding | GGT6     | 1.113361038  | 1.30082092  | 9.312223971  | 6.02E-19 | 3.77E-18 | 31.99671297 |
| ENSG00000138308 | protein_coding | PLA2G12B | 1.269345991  | 1.166805601 | 9.308176631  | 6.21E-19 | 3.89E-18 | 31.96526383 |
| ENSG00000143320 | protein_coding | CRABP2   | 1.806454805  | 5.539722068 | 9.305385277  | 6.35E-19 | 3.97E-18 | 31.94357945 |
| ENSG00000125851 | protein_coding | PCSK2    | 2.605278153  | 4.366625415 | 9.297453122  | 6.76E-19 | 4.22E-18 | 31.88198303 |
| ENSG00000115884 | protein_coding | SDC1     | 1.000943935  | 5.242340503 | 9.26601407   | 8.65E-19 | 5.35E-18 | 31.63819277 |
| ENSG00000185499 | protein_coding | MUC1     | 1.918091498  | 4.090578468 | 9.237330045  | 1.08E-18 | 6.66E-18 | 31.41625061 |
| ENSG00000171812 | protein_coding | COL8A2   | 1.555202926  | 4.384524844 | 9.231935363  | 1.13E-18 | 6.93E-18 | 31.37456115 |
| ENSG00000134817 | protein_coding | APLNR    | 1.082807309  | 3.327994847 | 9.228790916  | 1.16E-18 | 7.09E-18 | 31.35026882 |
| ENSG00000240583 | protein_coding | AQP1     | 1.022988888  | 5.507369977 | 9.228465394  | 1.16E-18 | 7.11E-18 | 31.34775433 |
| ENSG00000158457 | protein_coding | TSPAN33  | -1.106717837 | 2.559092159 | -9.183668493 | 1.65E-18 | 9.96E-18 | 31.00229275 |
| ENSG00000124731 | protein_coding | TREM1    | 1.087181493  | 1.333674736 | 9.179989939  | 1.69E-18 | 1.02E-17 | 30.97397527 |
| ENSG00000092758 | protein_coding | COL9A3   | -2.111114437 | 1.537235397 | -9.171628015 | 1.81E-18 | 1.09E-17 | 30.90963386 |
| ENSG00000180530 | protein_coding | NRIP1    | 1.082250983  | 3.008666061 | 9.160434026  | 1.97E-18 | 1.19E-17 | 30.82356316 |
| ENSG00000184613 | protein_coding | NELL2    | 1.978909961  | 4.23818853  | 9.150067754  | 2.14E-18 | 1.28E-17 | 30.74392041 |
| ENSG00000119508 | protein_coding | NR4A3    | -1.547489239 | 1.330988439 | -9.123292202 | 2.63E-18 | 1.57E-17 | 30.53849093 |
| ENSG00000124107 | protein_coding | SLPI     | 2.639249741  | 6.100429054 | 9.104128767  | 3.06E-18 | 1.81E-17 | 30.3917154  |
| ENSG00000060616 | protein_coding | CRLF1    | 2.536187387  | 3.67872088  | 9.101856146  | 3.11E-18 | 1.84E-17 | 30.37432302 |
| ENSG00000041982 | protein_coding | TNC      | 1.777125086  | 3.238977918 | 9.09602925   | 3.25E-18 | 1.92E-17 | 30.32974329 |
| ENSG00000275342 | protein_coding | SGK223   | -1.0027453   | 3.65176375  | -9.046307763 | 4.78E-18 | 2.78E-17 | 29.9501339  |
| ENSG00000167779 | protein_coding | IGFBP6   | 2.099120937  | 6.352383125 | 9.040272728  | 5.01E-18 | 2.90E-17 | 29.90415509 |
| ENSG00000188290 | protein_coding | HES4     | 1.070412394  | 2.373962059 | 9.023756208  | 5.69E-18 | 3.28E-17 | 29.77842916 |
| ENSG00000171877 | protein_coding | FRMD5    | 1.146549398  | 1.200009664 | 8.996503839  | 7.01E-18 | 4.01E-17 | 29.57132592 |
| ENSG00000102924 | protein_coding | CBLN1    | 1.888469103  | 2.253545177 | 8.986724604  | 7.56E-18 | 4.32E-17 | 29.49711412 |
| ENSG00000101670 | protein_coding | LIPG     | -1.339431442 | 3.97615485  | -8.971289907 | 8.51E-18 | 4.84E-17 | 29.38009782 |
| ENSG00000075461 | protein_coding | CACNG4   | 1.229607326  | 1.165429096 | 8.945194927  | 1.04E-17 | 5.87E-17 | 29.18257764 |
| ENSG00000170558 | protein_coding | CDH2     | 1.838329973  | 2.821250632 | 8.912245756  | 1.34E-17 | 7.50E-17 | 28.93374474 |
| ENSG00000198805 | protein_coding | PNP      | 1.494282403  | 3.90497879  | 8.857146485  | 2.04E-17 | 1.12E-16 | 28.51905801 |
| ENSG00000115457 | protein_coding | IGFBP2   | 1.038354366  | 2.802749032 | 8.848240163  | 2.18E-17 | 1.20E-16 | 28.45219547 |
| ENSG00000133392 | protein_coding | MYH11    | -1.09519783  | 1.600342875 | -8.790062866 | 3.39E-17 | 1.85E-16 | 28.01659601 |
| ENSG00000188133 | protein_coding | TMEM215  | 1.493709074  | 1.406239122 | 8.757195598  | 4.35E-17 | 2.35E-16 | 27.77139362 |
| ENSG00000169903 | protein_coding | TM4SF4   | 1.31753565   | 1.384763961 | 8.75449143   | 4.44E-17 | 2.40E-16 | 27.7512482  |
| ENSG00000179242 | protein_coding | CDH4     | 1.24346348   | 1.330795252 | 8.750872008  | 4.56E-17 | 2.46E-16 | 27.72429117 |
| ENSG00000169282 | protein_coding | KCNAB1   | -1.566296573 | 2.037197951 | -8.748811713 | 4.63E-17 | 2.50E-16 | 27.70894984 |
| ENSG00000135218 | protein_coding | CD36     | -1.107631397 | 1.538415116 | -8.728782777 | 5.38E-17 | 2.89E-16 | 27.55994312 |
| ENSG00000105246 | protein_coding | EBI3     | 1.12715342   | 1.972318641 | 8.716403051  | 5.91E-17 | 3.16E-16 | 27.46796347 |
| ENSG00000187193 | protein_coding | MT1X     | -1.310285662 | 5.848045465 | -8.70858942  | 6.27E-17 | 3.35E-16 | 27.40995661 |
| ENSG00000204866 | protein_coding | IGFL2    | 1.516748421  | 1.465098429 | 8.701231306  | 6.63E-17 | 3.53E-16 | 27.35536496 |
| ENSG00000143369 | protein_coding | ECM1     | 2.232067492  | 3.495428028 | 8.699070798  | 6.73E-17 | 3.59E-16 | 27.3393418  |
| ENSG00000165376 | protein_coding | CLDN2    | 1.496566601  | 1.688328138 | 8.686215996  | 7.42E-17 | 3.94E-16 | 27.24406373 |
| ENSG00000152137 | protein_coding | HSPB8    | -1.376768051 | 3.275631085 | -8.683999101 | 7.54E-17 | 4.00E-16 | 27.22764246 |
| ENSG00000116661 | protein_coding | FBXO2    | 1.144288978  | 3.693969934 | 8.668356042  | 8.48E-17 | 4.49E-16 | 27.1118534  |
| ENSG00000123358 | protein_coding | NR4A1    | -1.892734293 | 4.036811065 | -8.66691251  | 8.57E-17 | 4.53E-16 | 27.10117589 |
| ENSG00000153446 | protein_coding | C16orf89 | -1.556849314 | 6.418339986 | -8.664939846 | 8.70E-17 | 4.60E-16 | 27.08658654 |
| ENSG00000116106 | protein_coding | EPHA4    | 1.124971857  | 3.74761537  | 8.663185931  | 8.82E-17 | 4.66E-16 | 27.07361698 |

|                 |                |          |              |             |              |          |          |             |
|-----------------|----------------|----------|--------------|-------------|--------------|----------|----------|-------------|
| ENSG00000123689 | protein_coding | GOS2     | 1.806656776  | 3.808356506 | 8.661732401  | 8.91E-17 | 4.70E-16 | 27.06287006 |
| ENSG00000181408 | protein_coding | UTS2R    | -1.033255383 | 0.923139248 | -8.652328837 | 9.56E-17 | 5.03E-16 | 26.9933741  |
| ENSG00000185274 | protein_coding | WBSCR17  | -1.076743867 | 1.772897324 | -8.650881549 | 9.67E-17 | 5.08E-16 | 26.98268282 |
| ENSG00000099953 | protein_coding | MMP11    | 1.244173625  | 1.407170003 | 8.639208589  | 1.06E-16 | 5.53E-16 | 26.89649976 |
| ENSG00000144476 | protein_coding | ACKR3    | -1.035920798 | 3.671826148 | -8.624177451 | 1.18E-16 | 6.18E-16 | 26.78564437 |
| ENSG00000126752 | protein_coding | SSX1     | 1.306233312  | 1.687477112 | 8.614126713  | 1.27E-16 | 6.64E-16 | 26.71159614 |
| ENSG00000137699 | protein_coding | TRIM29   | 1.076448931  | 1.154984317 | 8.608937897  | 1.32E-16 | 6.89E-16 | 26.67339185 |
| ENSG00000170345 | protein_coding | FOS      | -1.956889174 | 7.187632575 | -8.595991401 | 1.46E-16 | 7.57E-16 | 26.57814056 |
| ENSG00000072315 | protein_coding | TRPC5    | 1.407573872  | 1.298865829 | 8.587135711  | 1.56E-16 | 8.05E-16 | 26.51304531 |
| ENSG00000204421 | protein_coding | LY6G6C   | 1.06186624   | 1.199128281 | 8.586329713  | 1.57E-16 | 8.10E-16 | 26.50712306 |
| ENSG00000211445 | protein_coding | GPX3     | -1.119138376 | 9.419378    | -8.578359208 | 1.66E-16 | 8.57E-16 | 26.44857929 |
| ENSG00000166292 | protein_coding | TMEM100  | 1.409989288  | 1.969806957 | 8.542818406  | 2.16E-16 | 1.11E-15 | 26.18800232 |
| ENSG00000107562 | protein_coding | CXCL12   | -1.169943804 | 3.07283066  | -8.484181994 | 3.34E-16 | 1.68E-15 | 25.75978591 |
| ENSG00000130203 | protein_coding | APOE     | 2.167375291  | 7.004096171 | 8.476757419  | 3.53E-16 | 1.77E-15 | 25.70571579 |
| ENSG00000095970 | protein_coding | TREM2    | 1.295474365  | 2.96925961  | 8.470780795  | 3.69E-16 | 1.85E-15 | 25.6622152  |
| ENSG00000113389 | protein_coding | NPR3     | -1.152340622 | 1.329398926 | -8.457123241 | 4.08E-16 | 2.04E-15 | 25.56289212 |
| ENSG00000112936 | protein_coding | C7       | -1.835708745 | 2.668208004 | -8.453966057 | 4.18E-16 | 2.09E-15 | 25.53994825 |
| ENSG00000172020 | protein_coding | GAP43    | 1.710614098  | 1.595878519 | 8.427512506  | 5.07E-16 | 2.52E-15 | 25.34794759 |
| ENSG00000086548 | protein_coding | CEACAM6  | 1.669780579  | 1.637921089 | 8.41784037   | 5.45E-16 | 2.70E-15 | 25.27785526 |
| ENSG00000153714 | protein_coding | LURAP1L  | 1.104289835  | 2.169555457 | 8.403806929  | 6.04E-16 | 2.98E-15 | 25.1762606  |
| ENSG00000101198 | protein_coding | NKAIN4   | 1.074022822  | 1.481944433 | 8.403448937  | 6.06E-16 | 2.99E-15 | 25.17367054 |
| ENSG00000125869 | protein_coding | LAMP5    | 1.833178007  | 2.300685323 | 8.385728816  | 6.90E-16 | 3.39E-15 | 25.04556525 |
| ENSG00000120129 | protein_coding | DUSP1    | -1.464403741 | 7.707143817 | -8.297045968 | 1.32E-15 | 6.35E-15 | 24.4073927  |
| ENSG00000183160 | protein_coding | TMEM119  | -1.142563381 | 1.861002032 | -8.29203062  | 1.37E-15 | 6.58E-15 | 24.37144909 |
| ENSG00000025423 | protein_coding | HSD17B6  | -1.60322473  | 3.124899649 | -8.233467838 | 2.09E-15 | 9.90E-15 | 23.95292061 |
| ENSG00000167757 | protein_coding | KLK11    | 2.047463053  | 1.867991499 | 8.226440459  | 2.20E-15 | 1.04E-14 | 23.90284411 |
| ENSG00000261115 | protein_coding | TMEM178B | -1.09127433  | 1.916096145 | -8.206485079 | 2.54E-15 | 1.20E-14 | 23.76081464 |
| ENSG00000198535 | protein_coding | C2CD4A   | 1.304812905  | 1.2606625   | 8.145446013  | 3.94E-15 | 1.83E-14 | 23.32795193 |
| ENSG00000120885 | protein_coding | CLU      | 1.329346789  | 9.737684743 | 8.122472519  | 4.65E-15 | 2.15E-14 | 23.16565057 |
| ENSG00000122756 | protein_coding | CNTFR    | -1.15745601  | 0.772640179 | -8.08340439  | 6.15E-15 | 2.82E-14 | 22.89042307 |
| ENSG00000163207 | protein_coding | IVL      | 1.396334332  | 1.272833179 | 8.082585095  | 6.18E-15 | 2.83E-14 | 22.88466181 |
| ENSG00000187634 | protein_coding | SAMD11   | 1.14740548   | 1.930288573 | 8.057164445  | 7.41E-15 | 3.37E-14 | 22.70611946 |
| ENSG00000118137 | protein_coding | APOA1    | -1.092701702 | 0.844584056 | -8.028622771 | 9.08E-15 | 4.11E-14 | 22.50615416 |
| ENSG00000179388 | protein_coding | EGR3     | -1.199162089 | 1.860294314 | -8.02229443  | 9.50E-15 | 4.29E-14 | 22.46188873 |
| ENSG00000124939 | protein_coding | SCGB2A1  | -1.006514871 | 1.3892793   | -8.011345967 | 1.03E-14 | 4.62E-14 | 22.38536786 |
| ENSG00000167772 | protein_coding | ANGPTL4  | 1.175806849  | 4.077630285 | 8.007191072  | 1.06E-14 | 4.76E-14 | 22.35634888 |
| ENSG00000080200 | protein_coding | CRYBG3   | -1.050469406 | 2.339800053 | -7.99956877  | 1.12E-14 | 5.01E-14 | 22.3031417  |
| ENSG00000135318 | protein_coding | NT5E     | 1.229201167  | 4.357681918 | 7.981732574  | 1.27E-14 | 5.66E-14 | 22.17878447 |
| ENSG00000163520 | protein_coding | FBLN2    | -1.050149127 | 3.248170062 | -7.979323449 | 1.29E-14 | 5.75E-14 | 22.16200349 |
| ENSG00000101197 | protein_coding | BIRC7    | 1.50023592   | 1.453510005 | 7.932942162  | 1.79E-14 | 7.87E-14 | 21.83966859 |
| ENSG00000116741 | protein_coding | RGS2     | -1.160602767 | 2.753041156 | -7.923519449 | 1.91E-14 | 8.38E-14 | 21.77435568 |
| ENSG00000108821 | protein_coding | COL1A1   | 1.955377019  | 5.395699226 | 7.91707781   | 2.00E-14 | 8.75E-14 | 21.72973938 |
| ENSG00000128228 | protein_coding | SDF2L1   | -1.051596762 | 4.758523441 | -7.908618176 | 2.12E-14 | 9.27E-14 | 21.67118731 |
| ENSG00000170367 | protein_coding | CST5     | 1.025083675  | 0.920418238 | 7.895196608  | 2.33E-14 | 1.01E-13 | 21.57838837 |
| ENSG00000164283 | protein_coding | ESM1     | 1.264979032  | 2.158969271 | 7.887789015  | 2.46E-14 | 1.07E-13 | 21.52722174 |
| ENSG00000117228 | protein_coding | GBP1     | -1.144466949 | 3.542801579 | -7.835613146 | 3.54E-14 | 1.51E-13 | 21.16785035 |
| ENSG00000105088 | protein_coding | OLFM2    | -1.169621454 | 2.208777047 | -7.833457825 | 3.59E-14 | 1.54E-13 | 21.15304382 |
| ENSG00000111863 | protein_coding | ADTRP    | 1.036334541  | 1.274072223 | 7.830680895  | 3.66E-14 | 1.56E-13 | 21.13397151 |
| ENSG00000118523 | protein_coding | CTGF     | -1.555923056 | 6.896039859 | -7.826289132 | 3.78E-14 | 1.61E-13 | 21.10381875 |
| ENSG00000132329 | protein_coding | RAMP1    | 1.454817337  | 2.458335829 | 7.820964057  | 3.92E-14 | 1.67E-13 | 21.06727523 |
| ENSG00000130208 | protein_coding | APOC1    | 1.927280563  | 5.112698216 | 7.798546721  | 4.58E-14 | 1.94E-13 | 20.91364155 |
| ENSG00000166448 | protein_coding | TMEM130  | 1.007156817  | 1.070607139 | 7.792353405  | 4.78E-14 | 2.02E-13 | 20.87125543 |
| ENSG00000136286 | protein_coding | MYO1G    | 1.287276148  | 2.081250694 | 7.74242045   | 6.77E-14 | 2.83E-13 | 20.53045421 |
| ENSG00000102575 | protein_coding | ACP5     | 1.177048951  | 3.417724118 | 7.660169517  | 1.19E-13 | 4.91E-13 | 19.9727116  |
| ENSG00000185290 | protein_coding | NUPR1L   | -1.102347098 | 2.650835879 | -7.635586064 | 1.41E-13 | 5.77E-13 | 19.80689419 |
| ENSG00000170801 | protein_coding | HTRA3    | -1.161019729 | 2.374999052 | -7.634608921 | 1.42E-13 | 5.81E-13 | 19.8003117  |
| ENSG00000196260 | protein_coding | SFTA2    | 1.077270495  | 1.543451718 | 7.63218831   | 1.45E-13 | 5.90E-13 | 19.78400813 |
| ENSG00000113657 | protein_coding | DPYSL3   | 1.113397918  | 4.605004641 | 7.628877874  | 1.48E-13 | 6.03E-13 | 19.76171771 |
| ENSG00000155897 | protein_coding | ADCY8    | 1.076530341  | 0.962068577 | 7.612740766  | 1.65E-13 | 6.71E-13 | 19.65316654 |
| ENSG00000156284 | protein_coding | CLDN8    | -1.033384898 | 3.028768718 | -7.596249643 | 1.85E-13 | 7.48E-13 | 19.54241605 |
| ENSG00000182326 | protein_coding | C1S      | -1.535164198 | 3.305414361 | -7.591234516 | 1.91E-13 | 7.73E-13 | 19.50877219 |
| ENSG00000156298 | protein_coding | TSPAN7   | -1.063266237 | 3.101751988 | -7.567233038 | 2.25E-13 | 9.05E-13 | 19.34799514 |
| ENSG00000169715 | protein_coding | MT1E     | -1.345891636 | 5.887914509 | -7.562841528 | 2.32E-13 | 9.31E-13 | 19.31862039 |
| ENSG00000019169 | protein_coding | MARCO    | 1.39674525   | 2.251435916 | 7.542606591  | 2.66E-13 | 1.06E-12 | 19.18343875 |
| ENSG00000162817 | protein_coding | C1orf115 | 1.029606244  | 5.127909782 | 7.538251109  | 2.74E-13 | 1.09E-12 | 19.15437798 |
| ENSG00000054179 | protein_coding | ENTPD2   | 1.072090155  | 1.329068839 | 7.504748762  | 3.44E-13 | 1.36E-12 | 18.93127544 |
| ENSG00000178752 | protein_coding | FAM132B  | 1.270667473  | 2.971242322 | 7.480629499  | 4.05E-13 | 1.59E-12 | 18.77113304 |
| ENSG00000170369 | protein_coding | CST2     | 1.58933649   | 1.470017904 | 7.391874027  | 7.36E-13 | 2.82E-12 | 18.18527435 |
| ENSG00000167755 | protein_coding | KLK6     | 1.269618258  | 1.134095352 | 7.314966111  | 1.23E-12 | 4.63E-12 | 17.68202496 |
| ENSG00000133110 | protein_coding | POSTN    | 1.625232083  | 3.187602765 | 7.313608243  | 1.24E-12 | 4.67E-12 | 17.67317666 |
| ENSG00000169908 | protein_coding | TM4SF1   | 1.350377644  | 5.284406477 | 7.300224182  | 1.35E-12 | 5.09E-12 | 17.58603066 |
| ENSG00000158477 | protein_coding | CD1A     | 1.228685837  | 1.293619887 | 7.245659858  | 1.94E-12 | 7.21E-12 | 17.23204848 |
| ENSG00000157734 | protein_coding | SNX22    | 1.186286064  | 5.173254404 | 7.219102024  | 2.31E-12 | 8.53E-12 | 17.06051173 |

|                 |                |          |              |             |              |          |          |             |
|-----------------|----------------|----------|--------------|-------------|--------------|----------|----------|-------------|
| ENSG00000198576 | protein_coding | ARC      | -1.302755407 | 1.451005706 | -7.167737284 | 3.24E-12 | 1.18E-11 | 16.73015666 |
| ENSG00000131400 | protein_coding | NAPSA    | 1.340041011  | 1.732421264 | 7.105875416  | 4.85E-12 | 1.74E-11 | 16.33476593 |
| ENSG00000125848 | protein_coding | FLRT3    | 1.000115119  | 2.790921296 | 7.101606476  | 4.99E-12 | 1.79E-11 | 16.30758117 |
| ENSG00000105696 | protein_coding | TMEM59L  | 1.118954694  | 1.304695674 | 7.005695902  | 9.27E-12 | 3.26E-11 | 15.70024758 |
| ENSG00000136689 | protein_coding | IL1RN    | 1.01301579   | 2.259586994 | 6.968441009  | 1.18E-11 | 4.09E-11 | 15.46611654 |
| ENSG00000102970 | protein_coding | CCL17    | 1.443979261  | 1.908214228 | 6.962390779  | 1.22E-11 | 4.25E-11 | 15.42818774 |
| ENSG00000116031 | protein_coding | CD207    | 1.224186519  | 1.492629545 | 6.950886884  | 1.32E-11 | 4.56E-11 | 15.35614278 |
| ENSG00000104332 | protein_coding | SFRP1    | -1.125777488 | 1.224122522 | -6.869879841 | 2.20E-11 | 7.51E-11 | 14.85153336 |
| ENSG00000187867 | protein_coding | PALM3    | 1.175980194  | 3.640730362 | 6.868131142  | 2.23E-11 | 7.59E-11 | 14.84069284 |
| ENSG00000183036 | protein_coding | PCP4     | -1.134075882 | 5.402985227 | -6.831496379 | 2.81E-11 | 9.47E-11 | 14.61409874 |
| ENSG00000137673 | protein_coding | MMP7     | 1.571721323  | 1.897558105 | 6.776203907  | 3.97E-11 | 1.33E-10 | 14.273958   |
| ENSG00000232629 | protein_coding | HLA-DQB2 | 1.486707842  | 3.566441997 | 6.696070215  | 6.55E-11 | 2.15E-10 | 13.78498443 |
| ENSG00000204983 | protein_coding | PRSS1    | 1.024128741  | 0.922962055 | 6.687211806  | 6.92E-11 | 2.27E-10 | 13.73122119 |
| ENSG00000099860 | protein_coding | GADD45B  | -1.0525731   | 5.108011357 | -6.683894628 | 7.06E-11 | 2.32E-10 | 13.71110358 |
| ENSG00000130054 | protein_coding | FAM155B  | -1.224007789 | 2.456451048 | -6.674462373 | 7.49E-11 | 2.45E-10 | 13.65394447 |
| ENSG00000128422 | protein_coding | KRT17    | 1.724955467  | 2.065906088 | 6.669865541  | 7.71E-11 | 2.52E-10 | 13.6261117  |
| ENSG00000204632 | protein_coding | HLA-G    | 1.377964131  | 2.763673075 | 6.592966984  | 1.24E-10 | 3.98E-10 | 13.16283332 |
| ENSG00000197747 | protein_coding | S100A10  | 1.130206747  | 6.11348106  | 6.556794107  | 1.54E-10 | 4.92E-10 | 12.94643101 |
| ENSG00000067082 | protein_coding | KLF6     | -1.069563781 | 5.246081352 | -6.514589764 | 2.00E-10 | 6.31E-10 | 12.69518278 |
| ENSG00000158869 | protein_coding | FCER1G   | 1.015040322  | 4.092263611 | 6.414240132  | 3.66E-10 | 1.13E-09 | 12.10316518 |
| ENSG00000158014 | protein_coding | SLC30A2  | 1.145247317  | 3.735572928 | 6.398517302  | 4.02E-10 | 1.24E-09 | 12.01109675 |
| ENSG00000169508 | protein_coding | GPR183   | -1.026888315 | 2.923697206 | -6.37645147  | 4.59E-10 | 1.40E-09 | 11.88220162 |
| ENSG00000134258 | protein_coding | VTCN1    | 1.05878583   | 0.977679942 | 6.318394064  | 6.48E-10 | 1.96E-09 | 11.54483408 |
| ENSG00000196154 | protein_coding | S100A4   | 1.21807151   | 6.727026742 | 6.281210708  | 8.08E-10 | 2.43E-09 | 11.33011496 |
| ENSG00000179344 | protein_coding | HLA-DQB1 | 1.249919083  | 4.822276155 | 6.25058895   | 9.68E-10 | 2.89E-09 | 11.15408124 |
| ENSG00000176769 | protein_coding | TCERG1L  | 1.126223827  | 3.924783574 | 6.233821718  | 1.07E-09 | 3.17E-09 | 11.05799718 |
| ENSG00000164932 | protein_coding | CTHRC1   | 1.192510812  | 2.488145643 | 6.22409977   | 1.13E-09 | 3.35E-09 | 11.00238486 |
| ENSG00000159403 | protein_coding | C1R      | -1.127603157 | 3.593985122 | -6.210926529 | 1.22E-09 | 3.61E-09 | 10.92714617 |
| ENSG00000196754 | protein_coding | S100A2   | 1.192751049  | 3.54793714  | 6.1834295    | 1.43E-09 | 4.20E-09 | 10.77052834 |
| ENSG00000275385 | protein_coding | CCL18    | 1.439983085  | 3.414772314 | 6.175807077  | 1.50E-09 | 4.38E-09 | 10.72721573 |
| ENSG00000267206 | protein_coding | LCN6     | 1.242481392  | 1.500142802 | 6.11171637   | 2.17E-09 | 6.27E-09 | 10.3648135  |
| ENSG00000145824 | protein_coding | CXCL14   | 2.224827794  | 5.301060512 | 6.079488948  | 2.62E-09 | 7.50E-09 | 10.18378705 |
| ENSG00000064300 | protein_coding | NGFR     | 1.126806379  | 2.751305672 | 5.975685542  | 4.74E-09 | 1.33E-08 | 9.606214814 |
| ENSG00000161798 | protein_coding | AQP5     | 1.172142203  | 2.655766323 | 5.967272699  | 4.97E-09 | 1.39E-08 | 9.559774605 |
| ENSG00000160307 | protein_coding | S100B    | 1.137691973  | 2.020080995 | 5.960617803  | 5.16E-09 | 1.44E-08 | 9.523077923 |
| ENSG00000105492 | protein_coding | SIGLEC6  | 1.049870562  | 1.039111117 | 5.960378383  | 5.17E-09 | 1.45E-08 | 9.521758353 |
| ENSG00000118785 | protein_coding | SPP1     | 1.247456653  | 3.763464783 | 5.863159219  | 8.92E-09 | 2.44E-08 | 8.989665866 |
| ENSG00000165966 | protein_coding | PDZRN4   | 1.019478345  | 1.388417059 | 5.632737957  | 3.17E-08 | 8.19E-08 | 7.758548638 |
| ENSG00000117322 | protein_coding | CR2      | -1.009284644 | 0.686512343 | -5.630431843 | 3.21E-08 | 8.29E-08 | 7.746442452 |
| ENSG00000162772 | protein_coding | ATF3     | -1.37074374  | 4.275878443 | -5.488929771 | 6.84E-08 | 1.72E-07 | 7.011847081 |
| ENSG00000125730 | protein_coding | C3       | 1.228819842  | 5.28566339  | 5.389340006  | 1.16E-07 | 2.83E-07 | 6.504610838 |
| ENSG00000166920 | protein_coding | C15orf48 | 1.018671959  | 2.770075106 | 5.357580985  | 1.36E-07 | 3.32E-07 | 6.344563682 |
| ENSG00000134020 | protein_coding | PEBP4    | -1.046598137 | 4.227486231 | -5.18317919  | 3.33E-07 | 7.84E-07 | 5.480523757 |
| ENSG00000107317 | protein_coding | PTGDS    | -1.112255975 | 2.588320871 | -5.090487385 | 5.30E-07 | 1.22E-06 | 5.031593931 |
| ENSG00000166592 | protein_coding | RRAD     | -1.007032509 | 2.863635931 | -4.974219133 | 9.41E-07 | 2.12E-06 | 4.478668946 |
| ENSG00000181617 | protein_coding | FDCSP    | -1.318137818 | 1.050193469 | -4.893148099 | 1.39E-06 | 3.09E-06 | 4.099882988 |
| ENSG00000074410 | protein_coding | CA12     | 1.035194663  | 2.266870664 | 4.858067331  | 1.65E-06 | 3.64E-06 | 3.937705498 |
| ENSG00000122852 | protein_coding | SFTPA1   | 1.346476059  | 1.264815818 | 4.587028156  | 5.87E-06 | 1.23E-05 | 2.720210682 |
| ENSG00000172724 | protein_coding | CCL19    | -1.374099485 | 2.386291283 | -4.435789975 | 1.16E-05 | 2.35E-05 | 2.068456022 |

Supplementary Table S6 263 genes co-expressed with risk model lncRNAs

| lncRNA      | m6A_genes | cor         | p. value |
|-------------|-----------|-------------|----------|
| SLC26A4-AS1 | TFF3      | 0.691522253 | 0        |
| SLC26A4-AS1 | CCL21     | 0.462608279 | 1.15E-24 |
| SLC26A4-AS1 | TPO       | 0.768972986 | 0        |
| SLC26A4-AS1 | MT1G      | 0.712226219 | 0        |
| SLC26A4-AS1 | DIO1      | 0.624572432 | 0        |
| SLC26A4-AS1 | DPT       | 0.397044397 | 4.99E-18 |
| SLC26A4-AS1 | CDH16     | 0.664986653 | 0        |
| SLC26A4-AS1 | CRABP1    | 0.675967312 | 6.55E-60 |
| SLC26A4-AS1 | SLC26A7   | 0.801704457 | 0        |
| SLC26A4-AS1 | MT1H      | 0.669495467 | 2.14E-58 |
| SLC26A4-AS1 | SLC26A4   | 0.975682875 | 0        |
| SLC26A4-AS1 | SLC5A8    | 0.707259984 | 8.22E-68 |
| SLC26A4-AS1 | PKHD1L1   | 0.624044239 | 9.28E-49 |
| SLC26A4-AS1 | TFCP2L1   | 0.692572557 | 0        |
| SLC26A4-AS1 | WSCD2     | 0.761837612 | 1.95E-84 |
| SLC26A4-AS1 | IPCEF1    | 0.680091173 | 0        |
| SLC26A4-AS1 | SLC5A5    | 0.606758568 | 1.70E-45 |
| SLC26A4-AS1 | MT1F      | 0.694547213 | 0        |
| SLC26A4-AS1 | FOSB      | 0.387975615 | 0        |
| SLC26A4-AS1 | SEMA3D    | 0.654877731 | 4.09E-55 |
| SLC26A4-AS1 | BMP8A     | 0.663268864 | 0        |
| SLC26A4-AS1 | MATN2     | 0.686888292 | 0        |
| SLC26A4-AS1 | PLA2R1    | 0.612237708 | 0        |
| SLC26A4-AS1 | COL23A1   | 0.77654567  | 0        |
| SLC26A4-AS1 | HGD       | 0.789392568 | 0        |
| SLC26A4-AS1 | TCEAL2    | 0.557023349 | 0        |
| SLC26A4-AS1 | CHRD1     | 0.390378137 | 1.97E-17 |
| SLC26A4-AS1 | TNFRSF11B | 0.515874695 | 0        |
| SLC26A4-AS1 | FAM167A   | 0.755026708 | 0        |
| SLC26A4-AS1 | KIT       | 0.671716541 | 0        |
| SLC26A4-AS1 | SLC4A4    | 0.758870352 | 0        |
| SLC26A4-AS1 | SMOC2     | 0.517939702 | 0        |
| SLC26A4-AS1 | FHL1      | 0.726795871 | 0        |
| SLC26A4-AS1 | OTOS      | 0.68113169  | 0        |
| SLC26A4-AS1 | IGFBPL1   | 0.721160217 | 1.15E-71 |
| SLC26A4-AS1 | HBB       | 0.351529855 | 4.36E-14 |
| SLC26A4-AS1 | BEX1      | 0.473386106 | 0        |
| SLC26A4-AS1 | FABP4     | 0.632265342 | 2.20E-50 |
| SLC26A4-AS1 | LMOD1     | 0.729719843 | 0        |
| SLC26A4-AS1 | SOD3      | 0.60570242  | 0        |
| SLC26A4-AS1 | TMEM171   | 0.661721421 | 0        |
| SLC26A4-AS1 | PI16      | 0.459634145 | 0        |
| SLC26A4-AS1 | ZMAT4     | 0.708938031 | 2.89E-68 |
| SLC26A4-AS1 | MFAP4     | 0.280518245 | 2.60E-09 |
| SLC26A4-AS1 | CWH43     | 0.585285695 | 1.03E-41 |
| SLC26A4-AS1 | SPX       | 0.725649401 | 0        |
| SLC26A4-AS1 | APOD      | 0.200955699 | 2.30E-05 |
| SLC26A4-AS1 | DPP6      | 0.647684793 | 0        |
| SLC26A4-AS1 | MMRN1     | 0.47046341  | 0        |

|             |            |             |          |
|-------------|------------|-------------|----------|
| SLC26A4-AS1 | WDR72      | 0.672983289 | 0        |
| SLC26A4-AS1 | MPPED2     | 0.784316785 | 0        |
| SLC26A4-AS1 | PAPSS2     | 0.553431608 | 0        |
| SLC26A4-AS1 | DCN        | 0.202420167 | 2.00E-05 |
| SLC26A4-AS1 | SORBS2     | 0.727595832 | 0        |
| SLC26A4-AS1 | EGR2       | 0.41493928  | 0        |
| SLC26A4-AS1 | EDN3       | 0.660220231 | 2.71E-56 |
| SLC26A4-AS1 | DIO2       | 0.682960822 | 0        |
| SLC26A4-AS1 | ITPR1      | 0.730887872 | 0        |
| SLC26A4-AS1 | CFD        | 0.283539943 | 1.73E-09 |
| SLC26A4-AS1 | CPXM1      | 0.43378064  | 0        |
| SLC26A4-AS1 | ELMO1      | 0.750138859 | 0        |
| SLC26A4-AS1 | GPC3       | 0.501279105 | 2.61E-29 |
| SLC26A4-AS1 | MYOC       | 0.341290307 | 1.95E-13 |
| SLC26A4-AS1 | DEPTOR     | 0.588362973 | 0        |
| SLC26A4-AS1 | DGKI       | 0.584169841 | 0        |
| SLC26A4-AS1 | CARTPT     | 0.695746414 | 8.72E-65 |
| SLC26A4-AS1 | IYD        | 0.616318362 | 0        |
| SLC26A4-AS1 | LYVE1      | 0.421916532 | 0        |
| SLC26A4-AS1 | CLCNKB     | 0.693737891 | 0        |
| SLC26A4-AS1 | NCAM1      | 0.454978767 | 0        |
| SLC26A4-AS1 | HBA2       | 0.297285521 | 2.55E-10 |
| SLC26A4-AS1 | GLT8D2     | 0.611716598 | 0        |
| SLC26A4-AS1 | OGDHL      | 0.540472091 | 0        |
| SLC26A4-AS1 | LIFR       | 0.694699546 | 0        |
| SLC26A4-AS1 | CSGALNACT1 | 0.463825858 | 0        |
| SLC26A4-AS1 | RAP1GAP    | 0.604513541 | 0        |
| SLC26A4-AS1 | COL9A3     | 0.616122343 | 0        |
| SLC26A4-AS1 | FBLN1      | 0.187541168 | 7.93E-05 |
| SLC26A4-AS1 | EFEMP1     | 0.421752426 | 0        |
| SLC26A4-AS1 | AOX1       | 0.567565769 | 8.53E-39 |
| SLC26A4-AS1 | GRIN2C     | 0.709959378 | 0        |
| SLC26A4-AS1 | C11orf74   | 0.663214824 | 0        |
| SLC26A4-AS1 | PPARGC1A   | 0.64865893  | 0        |
| SLC26A4-AS1 | ANGPTL1    | 0.652494064 | 0        |
| SLC26A4-AS1 | SCARA5     | 0.340529443 | 2.22E-13 |
| SLC26A4-AS1 | LTF        | 0.613828269 | 0        |
| SLC26A4-AS1 | CA4        | 0.685628809 | 3.04E-62 |
| SLC26A4-AS1 | TG         | 0.736577527 | 0        |
| SLC26A4-AS1 | FCGBP      | 0.638066675 | 0        |
| SLC26A4-AS1 | PBX4       | 0.67267068  | 0        |
| SLC26A4-AS1 | CYR61      | 0.394404951 | 0        |
| SLC26A4-AS1 | FOS        | 0.405775608 | 0        |
| SLC26A4-AS1 | KHDRBS2    | 0.731570818 | 0        |
| SLC26A4-AS1 | MUM1L1     | 0.385782955 | 0        |
| SLC26A4-AS1 | RGS16      | 0.707439358 | 0        |
| SLC26A4-AS1 | MT1M       | 0.562900654 | 0        |
| SLC26A4-AS1 | LRP2       | 0.672840601 | 0        |
| SLC26A4-AS1 | MAFB       | 0.636844748 | 0        |
| SLC26A4-AS1 | KCNK2      | 0.539839072 | 0        |
| SLC26A4-AS1 | TBC1D4     | 0.721661225 | 0        |



|             |          |             |          |
|-------------|----------|-------------|----------|
| SLC26A4-AS1 | MIOX     | 0.739853778 | 3.08E-77 |
| SLC26A4-AS1 | TPPP     | 0.681842152 | 0        |
| SLC26A4-AS1 | FMOD     | 0.526255471 | 0        |
| SLC26A4-AS1 | CITED2   | 0.433588451 | 0        |
| SLC26A4-AS1 | RGS8     | 0.690295503 | 2.10E-63 |
| SLC26A4-AS1 | ABI3BP   | 0.439467742 | 0        |
| SLC26A4-AS1 | ADH1B    | 0.428343739 | 5.13E-21 |
| SLC26A4-AS1 | OGN      | 0.275333267 | 4.46E-09 |
| SLC26A4-AS1 | NR4A1    | 0.350891446 | 4.90E-14 |
| SLC26A4-AS1 | FOXJ1    | 0.670347581 | 1.36E-58 |
| SLC26A4-AS1 | ALDH1A1  | 0.640134944 | 0        |
| SLC26A4-AS1 | OCA2     | 0.433837604 | 1.42E-21 |
| SLC26A4-AS1 | TMEM139  | 0.346333226 | 1.11E-13 |
| SLC26A4-AS1 | ARHGAP24 | 0.749110539 | 0        |
| SLC26A4-AS1 | SLC25A15 | 0.601369579 | 0        |
| SLC26A4-AS1 | DES      | 0.292402221 | 4.21E-10 |
| SLC26A4-AS1 | GDF10    | 0.561017215 | 9.22E-38 |
| SLC26A4-AS1 | KIAA1324 | 0.608313216 | 0        |
| SLC26A4-AS1 | JUN      | 0.449660158 | 0        |
| SLC26A4-AS1 | C7       | 0.197238006 | 3.27E-05 |
| SLC26A4-AS1 | LGI3     | 0.768758953 | 0        |
| SLC26A4-AS1 | CDON     | 0.747560118 | 0        |
| SLC26A4-AS1 | BCL2     | 0.604801754 | 0        |
| SLC26A4-AS1 | HLF      | 0.777660936 | 0        |
| SLC26A4-AS1 | EGR1     | 0.426210225 | 0        |
| SLC26A4-AS1 | IP6K3    | 0.582185824 | 0        |
| SLC26A4-AS1 | SCUBE3   | 0.581301044 | 0        |
| SLC26A4-AS1 | PKNOX2   | 0.573208952 | 0        |
| SLC26A4-AS1 | SMAD9    | 0.39430297  | 0        |
| SLC26A4-AS1 | IQGAP2   | 0.687146577 | 0        |
| SLC26A4-AS1 | GNA14    | 0.723573048 | 0        |
| SLC26A4-AS1 | LAYN     | 0.556741093 | 0        |
| SLC26A4-AS1 | AVPR1A   | 0.738996559 | 0        |
| SLC26A4-AS1 | PDLIM3   | 0.453741238 | 0        |
| SLC26A4-AS1 | GPM6A    | 0.668507618 | 0        |
| SLC26A4-AS1 | SDPR     | 0.634382739 | 0        |
| SLC26A4-AS1 | CRYAB    | 0.236475688 | 5.83E-07 |
| SLC26A4-AS1 | FOXA2    | 0.58308552  | 2.43E-41 |
| SLC26A4-AS1 | C8orf88  | 0.56848152  | 0        |
| SLC26A4-AS1 | ISM1     | 0.60334608  | 0        |
| SLC26A4-AS1 | BMP2     | 0.298182641 | 2.24E-10 |
| SLC26A4-AS1 | ID4      | 0.546157916 | 0        |
| SLC26A4-AS1 | NUPR1    | 0.383973113 | 0        |
| SLC26A4-AS1 | SERTM1   | 0.516128229 | 2.95E-31 |
| SLC26A4-AS1 | IRS1     | 0.691457859 | 0        |
| SLC26A4-AS1 | FIBIN    | 0.27645376  | 4.46E-09 |
| SLC26A4-AS1 | PODN     | 0.241528635 | 3.29E-07 |
| SLC26A4-AS1 | TDRD9    | 0.476844805 | 0        |
| SLC26A4-AS1 | EPHA3    | 0.46907213  | 0        |
| SLC26A4-AS1 | AIF1L    | 0.456662232 | 0        |
| SLC26A4-AS1 | EBF4     | 0.639978923 | 0        |



|             |          |             |            |
|-------------|----------|-------------|------------|
| SLC26A4-AS1 | ADM2     | 0.602939716 | 0          |
| SLC26A4-AS1 | GSTM3    | 0.652104012 | 0          |
| SLC26A4-AS1 | HSD17B6  | 0.478616067 | 0          |
| SLC26A4-AS1 | AGR3     | 0.37192323  | 7.54E-16   |
| SLC26A4-AS1 | EPHB1    | 0.548596805 | 0          |
| SLC26A4-AS1 | TMOD1    | 0.47956439  | 0          |
| SLC26A4-AS1 | WASF3    | 0.683073866 | 0          |
| SLC26A4-AS1 | SELV     | 0.670841342 | 1.04E-58   |
| SLC26A4-AS1 | ENPP1    | 0.561624546 | 0          |
| SLC26A4-AS1 | SYNE1    | 0.717098279 | 1.62E-70   |
| SLC26A4-AS1 | PLCH1    | 0.626358161 | 0          |
| SLC26A4-AS1 | CCDC146  | 0.675711951 | 0          |
| SLC26A4-AS1 | SLC16A2  | 0.734132538 | 0          |
| SLC26A4-AS1 | IER2     | 0.511621284 | 0          |
| SLC26A4-AS1 | KCNAB1   | 0.707718209 | 0          |
| SLC26A4-AS1 | SYNDIG1  | 0.472751101 | 0          |
| SLC26A4-AS1 | C16orf89 | 0.786093153 | 0          |
| SLC26A4-AS1 | CTGF     | 0.285412902 | 1.34E-09   |
| SLC26A4-AS1 | NR4A3    | 0.206185659 | 1.39E-05   |
| SLC26A4-AS1 | KIAA1456 | 0.652803411 | 0          |
| SLC26A4-AS1 | AQP4     | 0.697685785 | 0          |
| SLC26A4-AS1 | RNF150   | 0.620193636 | 0          |
| SLC26A4-AS1 | C1S      | 0.124490166 | 0.00906192 |
| SLC26A4-AS1 | PFKFB2   | 0.599707106 | 0          |
| SLC26A4-AS1 | PROX1    | 0.704541058 | 0          |
| SLC26A4-AS1 | TCF7L1   | 0.711418456 | 0          |
| SLC26A4-AS1 | HSPB6    | 0.417478448 | 0          |
| SLC26A4-AS1 | FHDC1    | 0.663587004 | 0          |
| SLC26A4-AS1 | PRR15L   | 0.617727656 | 0          |
| SLC26A4-AS1 | SLC1A1   | 0.620706661 | 0          |
| SLC26A4-AS1 | BTBD11   | 0.713485733 | 0          |
| SLC26A4-AS1 | TRIM58   | 0.517905661 | 0          |
| SLC26A4-AS1 | LRIG1    | 0.640047572 | 0          |
| SLC26A4-AS1 | ROR2     | 0.362482093 | 5.41E-15   |
| SLC26A4-AS1 | GPR125   | 0.620651203 | 0          |
| SLC26A4-AS1 | FLRT1    | 0.678220908 | 0          |
| SLC26A4-AS1 | PGF      | 0.60116888  | 0          |
| SLC26A4-AS1 | DUSP1    | 0.361415478 | 6.70E-15   |
| SLC26A4-AS1 | PLA2G7   | 0.41219927  | 0          |
| SLC26A4-AS1 | PLSCR4   | 0.550314453 | 0          |
| SLC26A4-AS1 | FAM46B   | 0.391193191 | 0          |
| SLC26A4-AS1 | GLDC     | 0.497334313 | 0          |
| SLC26A4-AS1 | ZBTB16   | 0.477914398 | 0          |
| SLC26A4-AS1 | OMD      | 0.189156523 | 6.66E-05   |
| SLC26A4-AS1 | HSD11B2  | 0.616397082 | 0          |
| SLC26A4-AS1 | FGL2     | 0.252417614 | 9.19E-08   |
| SLC26A4-AS1 | CLCNKA   | 0.716143999 | 3.00E-70   |
| SLC26A4-AS1 | GATM     | 0.605314354 | 0          |
| SLC26A4-AS1 | TNS3     | 0.481785843 | 0          |
| SLC26A4-AS1 | TOB1     | 0.368780087 | 1.43E-15   |
| SLC26A4-AS1 | MARC2    | 0.732710337 | 0          |

|             |          |             |             |
|-------------|----------|-------------|-------------|
| SLC26A4-AS1 | LRRC2    | 0.6234227   | 0           |
| SLC26A4-AS1 | SORD     | 0.389282361 | 0           |
| SLC26A4-AS1 | RIMS4    | 0.521205502 | 0           |
| SLC26A4-AS1 | SLC29A4  | 0.637800447 | 0           |
| SLC26A4-AS1 | SLC39A14 | 0.632545097 | 0           |
| SLC26A4-AS1 | FAXDC2   | 0.629712751 | 0           |
| SLC26A4-AS1 | HSPB8    | 0.266816494 | 1.55E-08    |
| SLC26A4-AS1 | CCL19    | 0.081395735 | 0.088494168 |
| SLC26A4-AS1 | KCNIP3   | 0.722319633 | 0           |
| SLC26A4-AS1 | CGNL1    | 0.702132238 | 0           |
| SLC26A4-AS1 | ATF3     | 0.105790643 | 0.026700162 |
| SLC26A4-AS1 | SGCD     | 0.332534601 | 1.15E-12    |
| SLC26A4-AS1 | STARD13  | 0.605638593 | 0           |
| SLC26A4-AS1 | LDHD     | 0.715825194 | 0           |
| SLC26A4-AS1 | RCAN1    | 0.348689709 | 7.28E-14    |
| SLC26A4-AS1 | ID3      | 0.341626219 | 2.51E-13    |
| SLC26A4-AS1 | SYTL3    | 0.727042526 | 0           |
| SLC26A4-AS1 | MT1E     | 0.506806197 | 0           |
| SLC26A4-AS1 | CAMK1D   | 0.709649747 | 0           |
| SLC26A4-AS1 | PRKCQ    | 0.689211442 | 0           |
| SLC26A4-AS1 | NUAK2    | 0.401633255 | 0           |
| SLC26A4-AS1 | LIPG     | 0.657185327 | 0           |
| SLC26A4-AS1 | SLC25A25 | 0.354870687 | 2.36E-14    |
| SLC26A4-AS1 | PRKX     | 0.262385076 | 2.72E-08    |
| SLC26A4-AS1 | SRPX     | 0.251245046 | 1.06E-07    |
| SLC26A4-AS1 | FAM189A1 | 0.626936573 | 0           |
| SLC26A4-AS1 | PLEKHH1  | 0.650085811 | 0           |
| SLC26A4-AS1 | WNT11    | 0.497037732 | 0           |
| SLC26A4-AS1 | SNAI1    | 0.338412757 | 4.33E-13    |
| SLC26A4-AS1 | FDCSP    | 0.143690342 | 0.002546691 |
| SLC26A4-AS1 | MT1X     | 0.478949668 | 0           |
| SLC26A4-AS1 | ACACB    | 0.710016538 | 0           |
| SLC26A4-AS1 | ARC      | 0.228470542 | 1.41E-06    |
| SLC26A4-AS1 | KLK4     | 0.193733161 | 4.38E-05    |
| SLC26A4-AS1 | ZFPM2    | 0.352216489 | 3.85E-14    |
| SLC26A4-AS1 | AKAP12   | 0.435374181 | 0           |
| SLC26A4-AS1 | GJB6     | 0.424300732 | 1.30E-20    |
| SLC26A4-AS1 | ERO1LB   | 0.65972563  | 0           |
| SLC26A4-AS1 | DNALI1   | 0.581634645 | 0           |
| SLC26A4-AS1 | HKDC1    | 0.425388846 | 0           |
| SLC26A4-AS1 | ZFP36L2  | 0.474378682 | 0           |
| SLC26A4-AS1 | CAPSL    | 0.643985416 | 8.72E-53    |
| SLC26A4-AS1 | CYP7B1   | 0.534236221 | 0           |
| SLC26A4-AS1 | CPQ      | 0.591949466 | 0           |
| SLC26A4-AS1 | RPS6KA6  | 0.596961373 | 9.81E-44    |
| SLC26A4-AS1 | TLE1     | 0.462456421 | 0           |
| SLC26A4-AS1 | TP53INP2 | 0.644823654 | 0           |
| SLC26A4-AS1 | KATNAL2  | 0.679919408 | 0           |
| SLC26A4-AS1 | SGPP2    | 0.306607483 | 6.57E-11    |
| SLC26A4-AS1 | CTH      | 0.534434084 | 0           |
| SLC26A4-AS1 | KIF12    | 0.383159677 | 3.19E-18    |

|             |          |             |             |
|-------------|----------|-------------|-------------|
| SLC26A4-AS1 | TMEM220  | 0.701104628 | 0           |
| SLC26A4-AS1 | CENPJ    | 0.545884028 | 0           |
| SLC26A4-AS1 | FAM155B  | 0.633314422 | 0           |
| SLC26A4-AS1 | WFS1     | 0.537568543 | 0           |
| SLC26A4-AS1 | SELENBP1 | 0.698240936 | 0           |
| SLC26A4-AS1 | SNTA1    | 0.640460318 | 0           |
| SLC26A4-AS1 | FRAS1    | 0.136256266 | 0.004262469 |
| SLC26A4-AS1 | FBLN7    | 0.583756812 | 0           |
| SLC26A4-AS1 | AGPAT9   | 0.556112897 | 0           |
| SLC26A4-AS1 | GPR83    | 0.5408959   | 0           |
| SLC26A4-AS1 | PRTG     | 0.595191154 | 0           |
| SLC26A4-AS1 | EGR3     | 0.228646845 | 1.38E-06    |
| SLC26A4-AS1 | GRAMD2   | 0.349085576 | 6.78E-14    |
| SLC26A4-AS1 | HYOU1    | 0.602823835 | 0           |
| SLC26A4-AS1 | FBLN5    | 0.390650096 | 0           |
| SLC26A4-AS1 | ITM2A    | 0.634231257 | 0           |
| SLC26A4-AS1 | SRF      | 0.452504702 | 0           |
| SLC26A4-AS1 | FGFR2    | 0.407963871 | 0           |
| SLC26A4-AS1 | MT1A     | 0.292388321 | 4.22E-10    |
| SLC26A4-AS1 | MAMDC2   | 0.366821458 | 2.20E-15    |
| SLC26A4-AS1 | FHL2     | 0.275034396 | 5.38E-09    |
| SLC26A4-AS1 | FTCDNL1  | 0.518309613 | 0           |
| SLC26A4-AS1 | PKIA     | 0.416314816 | 0           |
| SLC26A4-AS1 | DNAJB4   | 0.459988738 | 0           |
| SLC26A4-AS1 | SLC25A33 | 0.590424433 | 0           |
| SLC26A4-AS1 | EYA2     | 0.370224982 | 1.03E-15    |
| SLC26A4-AS1 | LPAR1    | 0.216166454 | 5.13E-06    |
| SLC26A4-AS1 | STX11    | 0.456510041 | 0           |
| SLC26A4-AS1 | ARHGEF28 | 0.59646471  | 0           |
| SLC26A4-AS1 | OR2W3    | 0.550399981 | 0           |
| SLC26A4-AS1 | ALDH1B1  | 0.515756989 | 3.31E-31    |
| SLC26A4-AS1 | CXCL12   | 0.350803933 | 4.98E-14    |
| SLC26A4-AS1 | OLFM2    | 0.503082546 | 0           |
| SLC26A4-AS1 | TUB      | 0.461112939 | 0           |
| SLC26A4-AS1 | HTRA3    | 0.260336948 | 3.50E-08    |
| SLC26A4-AS1 | CKB      | 0.521693989 | 0           |
| SLC26A4-AS1 | RGS2     | 0.080722348 | 0.091164748 |
| SLC26A4-AS1 | SHANK2   | 0.697510758 | 0           |
| SLC26A4-AS1 | CNTFR    | 0.650897927 | 2.98E-54    |
| SLC26A4-AS1 | CYTH3    | 0.678267998 | 0           |
| SLC26A4-AS1 | PLAC9    | 0.41509062  | 0           |
| SLC26A4-AS1 | WVOX     | 0.655074365 | 0           |
| SLC26A4-AS1 | NPR3     | 0.47416153  | 0           |
| SLC26A4-AS1 | SDC2     | 0.426602263 | 0           |
| SLC26A4-AS1 | KLF15    | 0.562223808 | 0           |
| SLC26A4-AS1 | TMEM164  | 0.614920415 | 0           |
| SLC26A4-AS1 | LONRF3   | 0.324327054 | 4.34E-12    |
| SLC26A4-AS1 | GBP1     | 0.276685947 | 4.33E-09    |
| SLC26A4-AS1 | ARHGAP6  | 0.542269451 | 0           |
| SLC26A4-AS1 | TMEM119  | 0.166508566 | 0.000467308 |
| SLC26A4-AS1 | SH3RF1   | 0.496729661 | 0           |

|             |          |             |             |
|-------------|----------|-------------|-------------|
| SLC26A4-AS1 | CRELD2   | 0.571850719 | 0           |
| SLC26A4-AS1 | PCP4     | 0.053979524 | 0.258956873 |
| SLC26A4-AS1 | GCSH     | 0.688888195 | 0           |
| SLC26A4-AS1 | IMPA2    | 0.510495664 | 0           |
| SLC26A4-AS1 | C1R      | 0.089345053 | 0.061448065 |
| SLC26A4-AS1 | SUCNR1   | 0.479583963 | 0           |
| SLC26A4-AS1 | SFRP1    | 0.515550456 | 0           |
| SLC26A4-AS1 | UGT8     | 0.506013753 | 0           |
| SLC26A4-AS1 | TLE4     | 0.289303636 | 7.85E-10    |
| SLC26A4-AS1 | ANTXR1   | 0.390724561 | 0           |
| SLC26A4-AS1 | GPX3     | 0.355762843 | 1.99E-14    |
| SLC26A4-AS1 | DPY19L2  | 0.638387085 | 0           |
| SLC26A4-AS1 | FAM46C   | 0.568657114 | 0           |
| SLC26A4-AS1 | IL33     | 0.344659561 | 1.09E-13    |
| SLC26A4-AS1 | PEG3     | 0.597668339 | 0           |
| SLC26A4-AS1 | FAHD2A   | 0.642024073 | 0           |
| SLC26A4-AS1 | PTGDS    | 0.189987575 | 6.37E-05    |
| SLC26A4-AS1 | CHCHD10  | 0.452740577 | 0           |
| SLC26A4-AS1 | CD36     | 0.647282542 | 0           |
| SLC26A4-AS1 | ANKRD37  | 0.482740974 | 0           |
| SLC26A4-AS1 | TSPAN33  | 0.607815793 | 0           |
| SLC26A4-AS1 | PRDM16   | 0.542223921 | 0           |
| SLC26A4-AS1 | UST      | 0.723957426 | 0           |
| SLC26A4-AS1 | NEXN     | 0.595896084 | 0           |
| SLC26A4-AS1 | NUPR1L   | 0.234686921 | 6.60E-07    |
| SLC26A4-AS1 | SLC24A3  | 0.553264807 | 0           |
| SLC26A4-AS1 | MARC1    | 0.656983351 | 0           |
| SLC26A4-AS1 | MYH11    | 0.390261463 | 0           |
| SLC26A4-AS1 | APOA1    | 0.501742345 | 2.28E-29    |
| SLC26A4-AS1 | TMEM178B | 0.53811419  | 0           |
| SLC26A4-AS1 | CAPN6    | 0.281132882 | 2.04E-09    |
| SLC26A4-AS1 | PPM1L    | 0.69310785  | 0           |
| SLC26A4-AS1 | FZD8     | 0.629374328 | 0           |
| SLC26A4-AS1 | RCAN2    | 0.702193937 | 0           |
| SLC26A4-AS1 | COPZ2    | 0.572691672 | 0           |
| SLC26A4-AS1 | GAS1     | 0.331438909 | 1.38E-12    |
| SLC26A4-AS1 | DACT1    | 0.433829574 | 0           |
| SLC26A4-AS1 | WBSCR17  | 0.66794183  | 0           |
| SLC26A4-AS1 | NCS1     | 0.367426677 | 1.93E-15    |
| SLC26A4-AS1 | SPIRE2   | 0.447689899 | 0           |
| SLC26A4-AS1 | C15orf52 | 0.418380958 | 0           |
| SLC26A4-AS1 | SPAG5    | 0.482404111 | 0           |
| SLC26A4-AS1 | ARL4D    | 0.506300689 | 0           |
| SLC26A4-AS1 | FAM189A2 | 0.566026887 | 0           |
| SLC26A4-AS1 | MAP1LC3A | 0.600601815 | 0           |
| SLC26A4-AS1 | KLF6     | 0.083914393 | 0.0790437   |
| SLC26A4-AS1 | ADD3     | 0.503593018 | 0           |
| SLC26A4-AS1 | TSPAN7   | 0.584666271 | 0           |
| SLC26A4-AS1 | KLF9     | 0.482239154 | 0           |
| SLC26A4-AS1 | KCNQ1    | 0.738709906 | 0           |
| SLC26A4-AS1 | MAN1A1   | 0.256494013 | 5.62E-08    |

|             |          |              |             |
|-------------|----------|--------------|-------------|
| SLC26A4-AS1 | MLF1     | 0.295837222  | 3.13E-10    |
| SLC26A4-AS1 | RARB     | 0.692190022  | 0           |
| SLC26A4-AS1 | CDC42EP2 | 0.575705852  | 0           |
| SLC26A4-AS1 | FAM3B    | 0.264205982  | 2.16E-08    |
| SLC26A4-AS1 | GADD45B  | 0.275859888  | 4.83E-09    |
| SLC26A4-AS1 | TMEM47   | 0.569173827  | 0           |
| SLC26A4-AS1 | SDF2L1   | 0.525962152  | 0           |
| SLC26A4-AS1 | CCDC85A  | 0.341954856  | 2.37E-13    |
| SLC26A4-AS1 | CRYBG3   | 0.208100319  | 1.15E-05    |
| SLC26A4-AS1 | FBLN2    | 0.136859924  | 0.004094239 |
| SLC26A4-AS1 | PEBP4    | 0.494009083  | 0           |
| SLC26A4-AS1 | CDADC1   | 0.707722606  | 0           |
| SLC26A4-AS1 | FAM63A   | 0.647317009  | 0           |
| SLC26A4-AS1 | GLUL     | 0.483012592  | 0           |
| SLC26A4-AS1 | FREM2    | 0.556041694  | 0           |
| SLC26A4-AS1 | ACKR3    | 0.481044744  | 0           |
| SLC26A4-AS1 | DENND6A  | 0.63521277   | 0           |
| SLC26A4-AS1 | CLDN8    | 0.138441692  | 0.003681551 |
| SLC26A4-AS1 | UTS2R    | 0.161928528  | 0.000660169 |
| SLC26A4-AS1 | SCNN1B   | 0.435453184  | 0           |
| SLC26A4-AS1 | TTC30A   | 0.572338639  | 0           |
| SLC26A4-AS1 | CORO2B   | 0.697660397  | 0           |
| SLC26A4-AS1 | TC2N     | 0.315275434  | 1.78E-11    |
| SLC26A4-AS1 | ALDH2    | 0.701197389  | 0           |
| SLC26A4-AS1 | GPR183   | 0.088108091  | 0.065141345 |
| SLC26A4-AS1 | C4orf47  | 0.521115577  | 0           |
| SLC26A4-AS1 | SLC25A42 | 0.711664118  | 0           |
| SLC26A4-AS1 | LGMN     | 0.616817345  | 0           |
| SLC26A4-AS1 | ACSF2    | 0.621309894  | 0           |
| SLC26A4-AS1 | KIAA1467 | 0.623162571  | 0           |
| SLC26A4-AS1 | PRKG1    | 0.691745221  | 0           |
| SLC26A4-AS1 | GNAI1    | 0.654930259  | 0           |
| SLC26A4-AS1 | ABCC4    | 0.397274741  | 0           |
| SLC26A4-AS1 | PRPS1    | 0.673772329  | 0           |
| SLC26A4-AS1 | TSPAN5   | 0.274431446  | 5.82E-09    |
| SLC26A4-AS1 | CR2      | 0.32974996   | 1.36E-12    |
| SLC26A4-AS1 | CCDC170  | 0.494788195  | 0           |
| SLC26A4-AS1 | RRAD     | 0.067318314  | 0.15905864  |
| SLC26A4-AS1 | SCGB2A1  | 0.47415231   | 0           |
| SLC26A4-AS1 | SESN3    | 0.254599636  | 7.07E-08    |
| SLC26A4-AS1 | SGK223   | 0.277349887  | 3.97E-09    |
| SLC26A4-AS1 | NDRG2    | 0.751430853  | 0           |
| SLC26A4-AS1 | C3orf52  | 0.332446378  | 1.17E-12    |
| SLC26A4-AS1 | FLRT3    | -0.176236182 | 0.000210853 |
| SLC26A4-AS1 | MST1R    | -0.626571343 | 0           |
| SLC26A4-AS1 | SDC1     | -0.31428073  | 2.07E-11    |
| SLC26A4-AS1 | ST8SIA4  | -0.527864188 | 0           |
| SLC26A4-AS1 | UBTD1    | -0.349279042 | 6.55E-14    |
| SLC26A4-AS1 | EPHA2    | -0.447340696 | 0           |
| SLC26A4-AS1 | TMEM130  | -0.322659758 | 5.65E-12    |
| SLC26A4-AS1 | SPINK2   | -0.389370158 | 0           |

|             |          |              |             |
|-------------|----------|--------------|-------------|
| SLC26A4-AS1 | MMP16    | -0.557231566 | 0           |
| SLC26A4-AS1 | SIGLEC15 | -0.482128805 | 0           |
| SLC26A4-AS1 | RIN1     | -0.544951591 | 0           |
| SLC26A4-AS1 | IL1RN    | -0.505148404 | 0           |
| SLC26A4-AS1 | FCER1G   | -0.209928741 | 9.63E-06    |
| SLC26A4-AS1 | CD276    | -0.643099624 | 0           |
| SLC26A4-AS1 | CTSB     | -0.368845049 | 1.41E-15    |
| SLC26A4-AS1 | FAM171A2 | -0.169748977 | 0.000360161 |
| SLC26A4-AS1 | ASPHD1   | -0.57836388  | 0           |
| SLC26A4-AS1 | C15orf48 | -0.352754477 | 3.49E-14    |
| SLC26A4-AS1 | DYSF     | -0.068140118 | 0.154022435 |
| SLC26A4-AS1 | PDZRN4   | -0.091200424 | 0.056233946 |
| SLC26A4-AS1 | EFHD2    | -0.175290695 | 0.000228231 |
| SLC26A4-AS1 | ASF1B    | -0.412075588 | 0           |
| SLC26A4-AS1 | AQP1     | 0.014814888  | 0.756819184 |
| SLC26A4-AS1 | ARRDC2   | -0.491039723 | 0           |
| SLC26A4-AS1 | PRSS1    | -0.360979057 | 5.88E-15    |
| SLC26A4-AS1 | MAPK13   | -0.423640278 | 0           |
| SLC26A4-AS1 | CST5     | -0.676571533 | 4.71E-60    |
| SLC26A4-AS1 | AHR      | -0.532026399 | 0           |
| SLC26A4-AS1 | BAX      | -0.51566889  | 0           |
| SLC26A4-AS1 | C1orf115 | -0.205817734 | 1.44E-05    |
| SLC26A4-AS1 | PLK3     | -0.447874145 | 0           |
| SLC26A4-AS1 | JAG2     | -0.167354908 | 0.000436774 |
| SLC26A4-AS1 | RAD23B   | -0.502686963 | 0           |
| SLC26A4-AS1 | CA12     | 0.160243761  | 0.000763099 |
| SLC26A4-AS1 | ADTRP    | -0.333033017 | 1.06E-12    |
| SLC26A4-AS1 | UCP2     | -0.36601015  | 2.61E-15    |
| SLC26A4-AS1 | IGFBP2   | -0.374788308 | 3.31E-16    |
| SLC26A4-AS1 | LOXL2    | -0.258225703 | 4.54E-08    |
| SLC26A4-AS1 | GPX1     | -0.387574642 | 0           |
| SLC26A4-AS1 | P3H3     | -0.527539807 | 0           |
| SLC26A4-AS1 | C2orf81  | -0.373661554 | 4.46E-16    |
| SLC26A4-AS1 | CDT1     | -0.490134518 | 0           |
| SLC26A4-AS1 | SNX25    | -0.21174766  | 8.03E-06    |
| SLC26A4-AS1 | MTHFD1L  | -0.582322271 | 0           |
| SLC26A4-AS1 | CDC42BPG | -0.611035518 | 2.76E-46    |
| SLC26A4-AS1 | MSN      | -0.485324821 | 0           |
| SLC26A4-AS1 | SIGLEC6  | -0.451249861 | 2.08E-23    |
| SLC26A4-AS1 | F2R      | -0.170908353 | 0.000327746 |
| SLC26A4-AS1 | TMEM184A | -0.648188882 | 0           |
| SLC26A4-AS1 | CKS2     | -0.377836814 | 1.33E-16    |
| SLC26A4-AS1 | TAX1BP3  | -0.64169345  | 0           |
| SLC26A4-AS1 | PMEP1    | -0.470890624 | 0           |
| SLC26A4-AS1 | CXCL16   | -0.548372135 | 0           |
| SLC26A4-AS1 | FAXC     | -0.700204104 | 0           |
| SLC26A4-AS1 | VTCN1    | -0.60065817  | 2.16E-44    |
| SLC26A4-AS1 | SH2D4A   | -0.460338934 | 0           |
| SLC26A4-AS1 | RNF24    | -0.496489105 | 0           |
| SLC26A4-AS1 | LY6G6C   | -0.642966525 | 1.42E-52    |
| SLC26A4-AS1 | NID1     | -0.354568148 | 2.49E-14    |

|             |          |              |             |
|-------------|----------|--------------|-------------|
| SLC26A4-AS1 | STAC     | -0.700774005 | 0           |
| SLC26A4-AS1 | RAB34    | -0.561108259 | 0           |
| SLC26A4-AS1 | HES4     | -0.37073673  | 9.15E-16    |
| SLC26A4-AS1 | EPHA10   | -0.628161621 | 0           |
| SLC26A4-AS1 | ENTPD2   | -0.481530536 | 0           |
| SLC26A4-AS1 | DDB2     | -0.547514162 | 0           |
| SLC26A4-AS1 | NKAIN4   | -0.334838887 | 7.88E-13    |
| SLC26A4-AS1 | TRIM29   | -0.594588346 | 0           |
| SLC26A4-AS1 | ADCY8    | -0.630071046 | 6.05E-50    |
| SLC26A4-AS1 | SFTA2    | -0.363249716 | 4.63E-15    |
| SLC26A4-AS1 | NRIP1    | -0.554287027 | 0           |
| SLC26A4-AS1 | VWA1     | -0.02792915  | 0.559329436 |
| SLC26A4-AS1 | APLNR    | -0.011269669 | 0.813778869 |
| SLC26A4-AS1 | REN      | -0.460304936 | 2.09E-24    |
| SLC26A4-AS1 | EDIL3    | -0.169144467 | 0.000378225 |
| SLC26A4-AS1 | AGRN     | -0.468741366 | 0           |
| SLC26A4-AS1 | TREM1    | -0.380801777 | 3.95E-17    |
| SLC26A4-AS1 | SRL      | -0.228890096 | 1.34E-06    |
| SLC26A4-AS1 | RASGRF1  | -0.532515737 | 0           |
| SLC26A4-AS1 | RMI2     | -0.512620384 | 0           |
| SLC26A4-AS1 | SAMD1    | -0.558652632 | 0           |
| SLC26A4-AS1 | MGAT4B   | -0.686540649 | 0           |
| SLC26A4-AS1 | NXN      | -0.632647362 | 0           |
| SLC26A4-AS1 | SH3BGRL3 | -0.480589021 | 0           |
| SLC26A4-AS1 | CA11     | -0.256827898 | 5.39E-08    |
| SLC26A4-AS1 | PLD3     | -0.221157419 | 3.06E-06    |
| SLC26A4-AS1 | LURAP1L  | -0.497246232 | 0           |
| SLC26A4-AS1 | CARNS1   | -0.248501207 | 1.46E-07    |
| SLC26A4-AS1 | PDLIM7   | -0.439535398 | 0           |
| SLC26A4-AS1 | BCL2L1   | -0.67222134  | 0           |
| SLC26A4-AS1 | GGT6     | -0.314850489 | 1.90E-11    |
| SLC26A4-AS1 | DPYSL3   | -0.357633391 | 1.40E-14    |
| SLC26A4-AS1 | FYN      | -0.530635969 | 0           |
| SLC26A4-AS1 | TK1      | -0.377302229 | 1.59E-16    |
| SLC26A4-AS1 | AK1      | -0.101750128 | 0.033097456 |
| SLC26A4-AS1 | HIGD1B   | 0.098045484  | 0.040070285 |
| SLC26A4-AS1 | TMEM59L  | -0.495101371 | 0           |
| SLC26A4-AS1 | MEGF9    | -0.360284752 | 8.37E-15    |
| SLC26A4-AS1 | ZFP36L1  | -0.488839687 | 0           |
| SLC26A4-AS1 | ADRA1B   | -0.234431389 | 7.32E-07    |
| SLC26A4-AS1 | EPHA4    | -0.512725627 | 0           |
| SLC26A4-AS1 | TCERG1L  | -0.139876517 | 0.003340226 |
| SLC26A4-AS1 | NGFR     | -0.264310799 | 2.13E-08    |
| SLC26A4-AS1 | EBI3     | -0.494078867 | 0           |
| SLC26A4-AS1 | S100A10  | -0.576750057 | 0           |
| SLC26A4-AS1 | S100B    | -0.354505315 | 2.52E-14    |
| SLC26A4-AS1 | CD44     | -0.110876213 | 0.020185272 |
| SLC26A4-AS1 | BHLHE41  | -0.454609281 | 0           |
| SLC26A4-AS1 | FBX02    | -0.354892672 | 2.35E-14    |
| SLC26A4-AS1 | SLC30A2  | -0.430057132 | 0           |
| SLC26A4-AS1 | FRMD5    | -0.500937969 | 0           |

|             |          |              |             |
|-------------|----------|--------------|-------------|
| SLC26A4-AS1 | SAMD11   | -0.357404466 | 1.46E-14    |
| SLC26A4-AS1 | SIPA1L2  | -0.470816727 | 0           |
| SLC26A4-AS1 | S100A16  | -0.65864086  | 0           |
| SLC26A4-AS1 | PPL      | -0.666705152 | 0           |
| SLC26A4-AS1 | ARHGDIB  | -0.105872341 | 0.026582653 |
| SLC26A4-AS1 | CDC42EP3 | -0.55235322  | 0           |
| SLC26A4-AS1 | RUNX2    | -0.421179404 | 0           |
| SLC26A4-AS1 | LAMC2    | -0.612634142 | 0           |
| SLC26A4-AS1 | BRINP1   | -0.498639782 | 0           |
| SLC26A4-AS1 | GPRC5B   | -0.386628588 | 0           |
| SLC26A4-AS1 | AQP5     | -0.154881041 | 0.00114542  |
| SLC26A4-AS1 | PLAG1    | -0.352327689 | 3.77E-14    |
| SLC26A4-AS1 | PTPRU    | -0.697196305 | 0           |
| SLC26A4-AS1 | ANGPTL4  | -0.454073421 | 0           |
| SLC26A4-AS1 | PALM3    | -0.35446248  | 2.54E-14    |
| SLC26A4-AS1 | ACP5     | -0.319497641 | 9.27E-12    |
| SLC26A4-AS1 | DLG4     | -0.275746702 | 4.90E-09    |
| SLC26A4-AS1 | ETNK2    | -0.467983246 | 0           |
| SLC26A4-AS1 | CD109    | -0.540420036 | 0           |
| SLC26A4-AS1 | SNX22    | -0.253585643 | 7.99E-08    |
| SLC26A4-AS1 | TMEM98   | -0.593684844 | 0           |
| SLC26A4-AS1 | CTHRC1   | -0.440898028 | 0           |
| SLC26A4-AS1 | S100A2   | -0.536326333 | 0           |
| SLC26A4-AS1 | C11orf80 | -0.640263306 | 0           |
| SLC26A4-AS1 | SREBF1   | -0.454759203 | 0           |
| SLC26A4-AS1 | PRSS22   | -0.658594337 | 0           |
| SLC26A4-AS1 | CMTM3    | -0.537338483 | 0           |
| SLC26A4-AS1 | RDH5     | -0.440400463 | 0           |
| SLC26A4-AS1 | MYH10    | -0.428545432 | 0           |
| SLC26A4-AS1 | EVPL     | -0.525882582 | 0           |
| SLC26A4-AS1 | SCD      | -0.462773427 | 0           |
| SLC26A4-AS1 | CD151    | -0.530041104 | 0           |
| SLC26A4-AS1 | S100A4   | -0.454127744 | 0           |
| SLC26A4-AS1 | BNIP1    | -0.344209074 | 1.60E-13    |
| SLC26A4-AS1 | MAP3K6   | -0.513905003 | 0           |
| SLC26A4-AS1 | MANEAL   | -0.443946675 | 0           |
| SLC26A4-AS1 | CD207    | -0.363642579 | 3.59E-15    |
| SLC26A4-AS1 | CD1A     | -0.376617869 | 3.05E-16    |
| SLC26A4-AS1 | C3       | -0.437763853 | 0           |
| SLC26A4-AS1 | NT5E     | -0.477185214 | 0           |
| SLC26A4-AS1 | CACNG4   | -0.660125086 | 2.85E-56    |
| SLC26A4-AS1 | FHOD1    | -0.435876993 | 0           |
| SLC26A4-AS1 | LEMD1    | -0.589794251 | 0           |
| SLC26A4-AS1 | ATP11A   | -0.21122343  | 8.46E-06    |
| SLC26A4-AS1 | PPAP2C   | -0.443807391 | 0           |
| SLC26A4-AS1 | DRAM1    | -0.57242516  | 0           |
| SLC26A4-AS1 | CDA      | -0.142642341 | 0.002762165 |
| SLC26A4-AS1 | CCND2    | -0.221294009 | 3.02E-06    |
| SLC26A4-AS1 | LCN6     | -0.219642039 | 3.39E-06    |
| SLC26A4-AS1 | CDH4     | -0.516919326 | 0           |
| SLC26A4-AS1 | MMP11    | -0.510932097 | 0           |



|             |          |              |             |
|-------------|----------|--------------|-------------|
| SLC26A4-AS1 | B3GAT1   | -0.428328563 | 0           |
| SLC26A4-AS1 | SPP1     | -0.197811028 | 3.10E-05    |
| SLC26A4-AS1 | HLA-DQB1 | -0.282467938 | 2.00E-09    |
| SLC26A4-AS1 | SDC3     | -0.559481103 | 0           |
| SLC26A4-AS1 | CX3CL1   | -0.275759751 | 4.89E-09    |
| SLC26A4-AS1 | SDK1     | -0.461195488 | 0           |
| SLC26A4-AS1 | DOCK9    | -0.494887764 | 0           |
| SLC26A4-AS1 | CSF2     | -0.528720486 | 5.53E-33    |
| SLC26A4-AS1 | GRHL3    | -0.579551766 | 0           |
| SLC26A4-AS1 | TMEM92   | -0.616907249 | 2.18E-47    |
| SLC26A4-AS1 | BASP1    | -0.636858364 | 0           |
| SLC26A4-AS1 | HRH1     | -0.595815663 | 0           |
| SLC26A4-AS1 | ESM1     | -0.041584945 | 0.384595959 |
| SLC26A4-AS1 | B4GALNT3 | -0.563460486 | 0           |
| SLC26A4-AS1 | LMO3     | -0.144067378 | 0.002501358 |
| SLC26A4-AS1 | C9orf16  | -0.557223198 | 0           |
| SLC26A4-AS1 | SEMA3F   | -0.306872293 | 6.31E-11    |
| SLC26A4-AS1 | PLA2G12B | -0.130107061 | 0.006335624 |
| SLC26A4-AS1 | KLK6     | -0.601927938 | 1.28E-44    |
| SLC26A4-AS1 | ST3GAL5  | -0.373989198 | 4.10E-16    |
| SLC26A4-AS1 | FAM132B  | -0.158258892 | 0.000888177 |
| SLC26A4-AS1 | CDKN1A   | -0.367257182 | 2.00E-15    |
| SLC26A4-AS1 | E2F1     | -0.462190334 | 0           |
| SLC26A4-AS1 | B3GNT8   | -0.405293645 | 0           |
| SLC26A4-AS1 | MTMR11   | -0.596957594 | 0           |
| SLC26A4-AS1 | MYO1G    | -0.444677562 | 0           |
| SLC26A4-AS1 | TMSB10   | -0.515852143 | 0           |
| SLC26A4-AS1 | UNC5CL   | -0.591424385 | 0           |
| SLC26A4-AS1 | ABR      | -0.468813703 | 0           |
| SLC26A4-AS1 | PLP2     | -0.572581606 | 0           |
| SLC26A4-AS1 | SRCIN1   | -0.431735207 | 0           |
| SLC26A4-AS1 | PDE9A    | -0.590141894 | 0           |
| SLC26A4-AS1 | TREM2    | -0.214813612 | 5.89E-06    |
| SLC26A4-AS1 | KDELR3   | -0.348059668 | 8.14E-14    |
| SLC26A4-AS1 | PC       | -0.496977451 | 0           |
| SLC26A4-AS1 | C2CD4A   | -0.578334378 | 0           |
| SLC26A4-AS1 | PELI1    | -0.514832051 | 0           |
| SLC26A4-AS1 | SSX1     | -0.37120919  | 8.18E-16    |
| SLC26A4-AS1 | MROH6    | -0.556941226 | 0           |
| SLC26A4-AS1 | ESPN     | -0.498140799 | 0           |
| SLC26A4-AS1 | BMP1     | -0.368993127 | 1.36E-15    |
| SLC26A4-AS1 | TM4SF4   | -0.497169709 | 8.70E-29    |
| SLC26A4-AS1 | CORO2A   | -0.523177322 | 0           |
| SLC26A4-AS1 | CD164L2  | -0.369796505 | 1.13E-15    |
| SLC26A4-AS1 | CTSS     | -0.328777619 | 2.13E-12    |
| SLC26A4-AS1 | CLU      | -0.52309917  | 0           |
| SLC26A4-AS1 | TMSB4X   | -0.462426493 | 0           |
| SLC26A4-AS1 | WNT10A   | -0.585883184 | 8.17E-42    |
| SLC26A4-AS1 | NAPSA    | -0.335809904 | 6.70E-13    |
| SLC26A4-AS1 | PLEKHA4  | -0.47570954  | 0           |
| SLC26A4-AS1 | SFTPA1   | 0.029978114  | 0.53101246  |

|             |          |              |             |
|-------------|----------|--------------|-------------|
| SLC26A4-AS1 | C1orf116 | -0.479241994 | 0           |
| SLC26A4-AS1 | TM4SF1   | -0.491459277 | 0           |
| SLC26A4-AS1 | SEL1L3   | -0.55105002  | 0           |
| SLC26A4-AS1 | VASN     | -0.590740447 | 0           |
| SLC26A4-AS1 | NPTXR    | -0.593204583 | 0           |
| SLC26A4-AS1 | PDE4C    | -0.574061393 | 0           |
| SLC26A4-AS1 | CDC42EP1 | -0.595599361 | 0           |
| SLC26A4-AS1 | ENDOD1   | -0.604051436 | 0           |
| SLC26A4-AS1 | RYR1     | -0.555545264 | 0           |
| SLC26A4-AS1 | IL1RAP   | -0.560284752 | 0           |
| SLC26A4-AS1 | SLC35F2  | -0.609627217 | 5.04E-46    |
| SLC26A4-AS1 | ISYNA1   | -0.392458378 | 0           |
| SLC26A4-AS1 | HLA-G    | -0.499299041 | 0           |
| SLC26A4-AS1 | CDKN2B   | -0.593072958 | 0           |
| SLC26A4-AS1 | ALDH1A3  | -0.504880048 | 0           |
| SLC26A4-AS1 | CLIP3    | -0.545384762 | 0           |
| SLC26A4-AS1 | ULBP2    | -0.422579195 | 0           |
| SLC26A4-AS1 | ETHE1    | -0.625402605 | 0           |
| SLC26A4-AS1 | XPR1     | -0.535115611 | 0           |
| SLC26A4-AS1 | SPTBN2   | -0.658612351 | 0           |
| SLC26A4-AS1 | IVL      | -0.489345984 | 8.20E-28    |
| SLC26A4-AS1 | MARCO    | -0.375825847 | 2.48E-16    |
| SLC26A4-AS1 | PLXND1   | -0.236266903 | 5.97E-07    |
| SLC26A4-AS1 | EMILIN2  | -0.417115912 | 0           |
| SLC26A4-AS1 | PLAUR    | -0.538081993 | 0           |
| SLC26A4-AS1 | CDC42EP5 | -0.645458091 | 0           |
| SLC26A4-AS1 | TRPC5    | -0.213332929 | 6.51E-06    |
| SLC26A4-AS1 | TMEM100  | -0.352992338 | 3.34E-14    |
| SLC26A4-AS1 | QSOX1    | -0.654656797 | 0           |
| SLC26A4-AS1 | ARHGAP23 | -0.531032971 | 0           |
| SLC26A4-AS1 | MDF1     | -0.389035139 | 0           |
| SLC26A4-AS1 | FSTL3    | -0.703132048 | 0           |
| SLC26A4-AS1 | INF2     | -0.513129012 | 0           |
| SLC26A4-AS1 | TGFBR1   | -0.501572832 | 0           |
| SLC26A4-AS1 | TGFBI    | -0.30874894  | 4.78E-11    |
| SLC26A4-AS1 | ERBB3    | -0.683309316 | 0           |
| SLC26A4-AS1 | CCL18    | -0.331060772 | 1.47E-12    |
| SLC26A4-AS1 | CCL17    | -0.437250134 | 6.33E-22    |
| SLC26A4-AS1 | C16orf45 | -0.449399036 | 0           |
| SLC26A4-AS1 | PRDM1    | -0.238153337 | 4.83E-07    |
| SLC26A4-AS1 | TRIM47   | -0.593827248 | 0           |
| SLC26A4-AS1 | CNFN     | -0.535752318 | 0           |
| SLC26A4-AS1 | ARMCX3   | -0.345192856 | 1.35E-13    |
| SLC26A4-AS1 | RAMP1    | -0.377756676 | 1.37E-16    |
| SLC26A4-AS1 | GABRD    | -0.013062774 | 0.784826238 |
| SLC26A4-AS1 | COL13A1  | -0.106441391 | 0.025776462 |
| SLC26A4-AS1 | S100A5   | -0.528831659 | 0           |
| SLC26A4-AS1 | MISP     | -0.625972932 | 0           |
| SLC26A4-AS1 | HES6     | -0.269272829 | 1.14E-08    |
| SLC26A4-AS1 | PSD3     | -0.435547222 | 0           |
| SLC26A4-AS1 | DOK7     | -0.698409722 | 0           |

|             |           |              |             |
|-------------|-----------|--------------|-------------|
| SLC26A4-AS1 | ZMAT3     | -0.586393422 | 0           |
| SLC26A4-AS1 | MFAP2     | -0.468654136 | 0           |
| SLC26A4-AS1 | TMEM79    | -0.559373732 | 0           |
| SLC26A4-AS1 | SLC1A5    | -0.508344988 | 0           |
| SLC26A4-AS1 | BBC3      | -0.583065639 | 0           |
| SLC26A4-AS1 | HLA-DQB2  | -0.345747723 | 1.23E-13    |
| SLC26A4-AS1 | C1QL1     | -0.467074212 | 0           |
| SLC26A4-AS1 | TMEM215   | -0.144537448 | 0.002399644 |
| SLC26A4-AS1 | PNP       | -0.418600947 | 0           |
| SLC26A4-AS1 | ARNTL     | -0.554109447 | 0           |
| SLC26A4-AS1 | CLDN2     | -0.212929668 | 6.78E-06    |
| SLC26A4-AS1 | MVP       | -0.560176956 | 0           |
| SLC26A4-AS1 | LGALS1    | -0.513510412 | 0           |
| SLC26A4-AS1 | BIRC7     | -0.487422371 | 1.41E-27    |
| SLC26A4-AS1 | COL8A1    | -0.512583081 | 0           |
| SLC26A4-AS1 | PERP      | -0.698461351 | 0           |
| SLC26A4-AS1 | GJA4      | -0.234679888 | 7.12E-07    |
| SLC26A4-AS1 | IGFL2     | -0.546867465 | 1.32E-35    |
| SLC26A4-AS1 | DAPK2     | -0.45369273  | 0           |
| SLC26A4-AS1 | MAMLD1    | -0.564593055 | 0           |
| SLC26A4-AS1 | ETV5      | -0.218005231 | 4.25E-06    |
| SLC26A4-AS1 | RUNX1     | -0.714347819 | 0           |
| SLC26A4-AS1 | LONRF2    | -0.303668617 | 1.01E-10    |
| SLC26A4-AS1 | SPOCK1    | -0.199982412 | 2.53E-05    |
| SLC26A4-AS1 | XKRX      | -0.438092915 | 0           |
| SLC26A4-AS1 | TGFB1     | -0.286788297 | 1.11E-09    |
| SLC26A4-AS1 | ERP27     | -0.255435341 | 6.39E-08    |
| SLC26A4-AS1 | TNFRSF10C | -0.441632886 | 0           |
| SLC26A4-AS1 | PALM      | -0.66245557  | 0           |
| SLC26A4-AS1 | TSC22D1   | -0.35544144  | 2.12E-14    |
| SLC26A4-AS1 | TGM2      | -0.505363571 | 0           |
| SLC26A4-AS1 | UBE2QL1   | -0.214872616 | 5.86E-06    |
| SLC26A4-AS1 | ECE1      | -0.546542862 | 0           |
| SLC26A4-AS1 | COL8A2    | -0.553040279 | 0           |
| SLC26A4-AS1 | HIST3H2A  | -0.486135279 | 0           |
| SLC26A4-AS1 | TNFRSF21  | -0.598464897 | 0           |
| SLC26A4-AS1 | SOX4      | -0.693072391 | 0           |
| SLC26A4-AS1 | ELF3      | -0.723578012 | 0           |
| SLC26A4-AS1 | TPD52L1   | -0.52561763  | 0           |
| SLC26A4-AS1 | INHBB     | -0.395927005 | 0           |
| SLC26A4-AS1 | HPN       | -0.432868769 | 0           |
| SLC26A4-AS1 | MMP7      | -0.464623905 | 6.82E-25    |
| SLC26A4-AS1 | RAB27A    | -0.501922319 | 0           |
| SLC26A4-AS1 | IGF2BP2   | -0.505442574 | 0           |
| SLC26A4-AS1 | ITGB4     | -0.586500226 | 0           |
| SLC26A4-AS1 | PPP1R1B   | -0.502139755 | 0           |
| SLC26A4-AS1 | NPDC1     | -0.347456577 | 9.07E-14    |
| SLC26A4-AS1 | CCL13     | -0.497988359 | 6.85E-29    |
| SLC26A4-AS1 | SPINT1    | -0.6891418   | 0           |
| SLC26A4-AS1 | HEY2      | -0.23199945  | 9.57E-07    |
| SLC26A4-AS1 | CST2      | -0.630616136 | 4.71E-50    |

|             |            |              |             |
|-------------|------------|--------------|-------------|
| SLC26A4-AS1 | ADM        | -0.262552586 | 2.66E-08    |
| SLC26A4-AS1 | VSTM2L     | -0.537941433 | 0           |
| SLC26A4-AS1 | FAM84A     | -0.526874874 | 0           |
| SLC26A4-AS1 | P4HA2      | -0.379426666 | 7.44E-17    |
| SLC26A4-AS1 | LPL        | -0.339202081 | 3.79E-13    |
| SLC26A4-AS1 | TMEM173    | -0.41473319  | 0           |
| SLC26A4-AS1 | DHRS3      | -0.523568509 | 0           |
| SLC26A4-AS1 | SCN1B      | -0.510736078 | 0           |
| SLC26A4-AS1 | GLT1D1     | -0.240219195 | 3.82E-07    |
| SLC26A4-AS1 | PHYHIP     | -0.445611701 | 0           |
| SLC26A4-AS1 | BHLHE40    | -0.50125767  | 0           |
| SLC26A4-AS1 | BID        | -0.59556759  | 0           |
| SLC26A4-AS1 | POSTN      | -0.368789732 | 1.43E-15    |
| SLC26A4-AS1 | ITGA3      | -0.696956175 | 0           |
| SLC26A4-AS1 | RSPO4      | -0.547203965 | 0           |
| SLC26A4-AS1 | ADAMTS9    | -0.072786135 | 0.127796384 |
| SLC26A4-AS1 | ABTB2      | -0.662025519 | 0           |
| SLC26A4-AS1 | KCNQ3      | -0.687610527 | 0           |
| SLC26A4-AS1 | ANXA1      | -0.508297898 | 0           |
| SLC26A4-AS1 | S100A11    | -0.613775506 | 0           |
| SLC26A4-AS1 | CEACAM6    | -0.55683126  | 4.11E-37    |
| SLC26A4-AS1 | IER5L      | -0.575467566 | 0           |
| SLC26A4-AS1 | KRT80      | -0.667616597 | 0           |
| SLC26A4-AS1 | CDH6       | -0.559114312 | 0           |
| SLC26A4-AS1 | UNC5B      | -0.503281402 | 0           |
| SLC26A4-AS1 | PLEKHN1    | -0.639717943 | 0           |
| SLC26A4-AS1 | SYTL1      | -0.478398205 | 0           |
| SLC26A4-AS1 | TMEM163    | -0.546057779 | 0           |
| SLC26A4-AS1 | C4orf48    | -0.295764176 | 3.17E-10    |
| SLC26A4-AS1 | B3GNT7     | -0.307037958 | 6.16E-11    |
| SLC26A4-AS1 | BAIAP3     | -0.525467282 | 0           |
| SLC26A4-AS1 | PHLDA2     | -0.468408332 | 0           |
| SLC26A4-AS1 | GAP43      | -0.59833061  | 5.61E-44    |
| SLC26A4-AS1 | S100A1     | -0.484886261 | 0           |
| SLC26A4-AS1 | PTPRE      | -0.659265227 | 0           |
| SLC26A4-AS1 | CCND1      | -0.521132882 | 0           |
| SLC26A4-AS1 | ST6GALNAC5 | -0.692234766 | 6.84E-64    |
| SLC26A4-AS1 | KRT17      | -0.327989856 | 2.42E-12    |
| SLC26A4-AS1 | HPCAL4     | -0.362861507 | 5.01E-15    |
| SLC26A4-AS1 | GABBR2     | -0.141583952 | 0.002971645 |
| SLC26A4-AS1 | DIRAS3     | -0.325536924 | 3.58E-12    |
| SLC26A4-AS1 | SERINC2    | -0.490485423 | 0           |
| SLC26A4-AS1 | PTCHD4     | -0.476785942 | 0           |
| SLC26A4-AS1 | EPS8       | -0.373750344 | 4.36E-16    |
| SLC26A4-AS1 | LY6E       | -0.571312731 | 0           |
| SLC26A4-AS1 | UPP1       | -0.676567371 | 0           |
| SLC26A4-AS1 | AHNAK2     | -0.653358561 | 0           |
| SLC26A4-AS1 | PLXNC1     | -0.359363378 | 1.00E-14    |
| SLC26A4-AS1 | TNC        | -0.542019108 | 0           |
| SLC26A4-AS1 | DUSP4      | -0.389365052 | 0           |
| SLC26A4-AS1 | NRCAM      | -0.459613437 | 0           |

|             |         |              |             |
|-------------|---------|--------------|-------------|
| SLC26A4-AS1 | NRP2    | -0.355095215 | 2.26E-14    |
| SLC26A4-AS1 | CTSC    | -0.460493253 | 0           |
| SLC26A4-AS1 | AMIGO2  | -0.42641206  | 0           |
| SLC26A4-AS1 | NAB2    | -0.412838388 | 0           |
| SLC26A4-AS1 | TBC1D2  | -0.707318229 | 0           |
| SLC26A4-AS1 | PHLDA3  | -0.594288502 | 0           |
| SLC26A4-AS1 | PTP4A3  | -0.392114707 | 0           |
| SLC26A4-AS1 | CRABP2  | -0.282626653 | 1.96E-09    |
| SLC26A4-AS1 | GOS2    | -0.359103816 | 1.05E-14    |
| SLC26A4-AS1 | S100A6  | -0.693358618 | 0           |
| SLC26A4-AS1 | FOXQ1   | -0.516958615 | 0           |
| SLC26A4-AS1 | LRG1    | -0.482866216 | 0           |
| SLC26A4-AS1 | LAMP5   | -0.451357098 | 0           |
| SLC26A4-AS1 | ALDH3B1 | -0.674714553 | 0           |
| SLC26A4-AS1 | CDH2    | -0.044219995 | 0.355177753 |
| SLC26A4-AS1 | SCG5    | -0.225261477 | 1.99E-06    |
| SLC26A4-AS1 | ZCCHC16 | -0.163100606 | 0.000602264 |
| SLC26A4-AS1 | GRB7    | -0.688370348 | 0           |
| SLC26A4-AS1 | TIAM1   | -0.448581487 | 0           |
| SLC26A4-AS1 | FXD5    | -0.325254952 | 3.74E-12    |
| SLC26A4-AS1 | CLDN9   | -0.523873459 | 0           |
| SLC26A4-AS1 | FAM43A  | -0.537543012 | 0           |
| SLC26A4-AS1 | CHST2   | -0.544635152 | 0           |
| SLC26A4-AS1 | HMGA2   | -0.41344077  | 0           |
| SLC26A4-AS1 | GALNT7  | -0.470384549 | 0           |
| SLC26A4-AS1 | CBLN1   | -0.417352071 | 0           |
| SLC26A4-AS1 | STRA6   | -0.618372873 | 0           |
| SLC26A4-AS1 | MUC21   | -0.522408905 | 4.15E-32    |
| SLC26A4-AS1 | PRR36   | -0.589412709 | 0           |
| SLC26A4-AS1 | NFE2L3  | -0.596951353 | 0           |
| SLC26A4-AS1 | NR1D1   | -0.442226191 | 0           |
| SLC26A4-AS1 | MUC1    | -0.651924446 | 0           |
| SLC26A4-AS1 | NAT8L   | -0.211333354 | 8.37E-06    |
| SLC26A4-AS1 | APOC1   | -0.189676526 | 6.55E-05    |
| SLC26A4-AS1 | EVA1A   | -0.712327916 | 0           |
| SLC26A4-AS1 | ENTPD1  | -0.273706658 | 6.40E-09    |
| SLC26A4-AS1 | COL1A1  | -0.436894533 | 0           |
| SLC26A4-AS1 | FNDC4   | -0.446270251 | 0           |
| SLC26A4-AS1 | FRMD3   | -0.05140901  | 0.282353192 |
| SLC26A4-AS1 | SHROOM4 | -0.465525776 | 0           |
| SLC26A4-AS1 | NELL2   | -0.350896269 | 4.89E-14    |
| SLC26A4-AS1 | EPHB3   | -0.689329734 | 0           |
| SLC26A4-AS1 | TMC6    | -0.614845383 | 0           |
| SLC26A4-AS1 | NOD1    | -0.485453184 | 0           |
| SLC26A4-AS1 | GGCT    | -0.575405441 | 0           |
| SLC26A4-AS1 | ICAM1   | -0.499370952 | 0           |
| SLC26A4-AS1 | PRSS23  | -0.409224662 | 0           |
| SLC26A4-AS1 | CFI     | -0.480305914 | 0           |
| SLC26A4-AS1 | CD55    | -0.680104647 | 0           |
| SLC26A4-AS1 | RASD2   | -0.529514038 | 0           |
| SLC26A4-AS1 | KLK11   | -0.484962818 | 2.81E-27    |

|             |           |              |             |
|-------------|-----------|--------------|-------------|
| SLC26A4-AS1 | ICAM5     | -0.477652425 | 0           |
| SLC26A4-AS1 | ADORA1    | -0.42803879  | 0           |
| SLC26A4-AS1 | ITGA2     | -0.62409515  | 0           |
| SLC26A4-AS1 | ABCC3     | -0.456332602 | 0           |
| SLC26A4-AS1 | MFGE8     | -0.566276804 | 0           |
| SLC26A4-AS1 | STK32A    | -0.32421174  | 4.42E-12    |
| SLC26A4-AS1 | CYSLTR2   | -0.402425982 | 0           |
| SLC26A4-AS1 | LAD1      | -0.611835174 | 0           |
| SLC26A4-AS1 | MGAT3     | -0.67311463  | 0           |
| SLC26A4-AS1 | IGFBP6    | -0.42202447  | 0           |
| SLC26A4-AS1 | CYP2S1    | -0.72241594  | 0           |
| SLC26A4-AS1 | KCNJ2     | -0.368993978 | 1.36E-15    |
| SLC26A4-AS1 | FAM20A    | -0.497795993 | 0           |
| SLC26A4-AS1 | TGFA      | -0.406005526 | 0           |
| SLC26A4-AS1 | MXRA8     | -0.625873646 | 0           |
| SLC26A4-AS1 | C8orf4    | -0.399481869 | 0           |
| SLC26A4-AS1 | CLDN10    | -0.545940966 | 1.82E-35    |
| SLC26A4-AS1 | PDE5A     | -0.470472913 | 0           |
| SLC26A4-AS1 | APOE      | -0.197988324 | 3.05E-05    |
| SLC26A4-AS1 | SPOCK2    | -0.609031479 | 0           |
| SLC26A4-AS1 | TENM1     | -0.092023789 | 0.054040677 |
| SLC26A4-AS1 | SLIT1     | -0.149482294 | 0.00170237  |
| SLC26A4-AS1 | CXCL14    | -0.351885441 | 4.09E-14    |
| SLC26A4-AS1 | ECM1      | -0.057411983 | 0.229856112 |
| SLC26A4-AS1 | DUSP5     | -0.642709288 | 0           |
| SLC26A4-AS1 | SEZ6L2    | -0.495568015 | 0           |
| SLC26A4-AS1 | THRSP     | -0.093498328 | 0.050290809 |
| SLC26A4-AS1 | C19orf33  | -0.696655197 | 0           |
| SLC26A4-AS1 | MPZL2     | -0.477719372 | 0           |
| SLC26A4-AS1 | CTSH      | -0.547764505 | 0           |
| SLC26A4-AS1 | CYP1B1    | -0.527794121 | 0           |
| SLC26A4-AS1 | ALOX5     | -0.555040182 | 0           |
| SLC26A4-AS1 | SYTL5     | -0.552754    | 1.73E-36    |
| SLC26A4-AS1 | TNFRSF12A | -0.552909647 | 0           |
| SLC26A4-AS1 | DUSP6     | -0.494189358 | 0           |
| SLC26A4-AS1 | ALOX15B   | -0.535757283 | 0           |
| SLC26A4-AS1 | SDC4      | -0.555329956 | 0           |
| SLC26A4-AS1 | MDK       | -0.504163629 | 0           |
| SLC26A4-AS1 | KRT19     | -0.745129171 | 0           |
| SLC26A4-AS1 | MET       | -0.598945299 | 0           |
| SLC26A4-AS1 | TESC      | -0.20234088  | 2.02E-05    |
| SLC26A4-AS1 | CXCL17    | -0.539087779 | 1.84E-34    |
| SLC26A4-AS1 | NPC2      | -0.376811047 | 1.85E-16    |
| SLC26A4-AS1 | COMP      | -0.503605925 | 0           |
| SLC26A4-AS1 | TUSC3     | -0.512110622 | 0           |
| SLC26A4-AS1 | TMPRSS4   | -0.711839713 | 0           |
| SLC26A4-AS1 | LGALS3    | -0.635978549 | 0           |
| SLC26A4-AS1 | CRLF1     | -0.558783123 | 0           |
| SLC26A4-AS1 | CTXN1     | -0.653341541 | 0           |
| SLC26A4-AS1 | PCSK1N    | -0.362256005 | 5.66E-15    |
| SLC26A4-AS1 | NMU       | -0.500375656 | 3.41E-29    |

|             |          |              |             |
|-------------|----------|--------------|-------------|
| SLC26A4-AS1 | GALE     | -0.540556484 | 0           |
| SLC26A4-AS1 | PCSK2    | -0.098025911 | 0.040110196 |
| SLC26A4-AS1 | GJB3     | -0.584396355 | 0           |
| SLC26A4-AS1 | SLPI     | -0.58934023  | 0           |
| SLC26A4-AS1 | AGR2     | -0.337564004 | 5.00E-13    |
| SLC26A4-AS1 | MRC2     | -0.563917769 | 0           |
| SLC26A4-AS1 | GOLT1A   | -0.435798274 | 0           |
| SLC26A4-AS1 | SLC27A6  | -0.579195066 | 1.09E-40    |
| SLC26A4-AS1 | KCNN4    | -0.662001407 | 0           |
| SLC26A4-AS1 | ETV4     | -0.519490355 | 1.04E-31    |
| SLC26A4-AS1 | SYT12    | -0.606615284 | 0           |
| SLC26A4-AS1 | PVRL4    | -0.69781273  | 0           |
| SLC26A4-AS1 | PLCD3    | -0.670665954 | 0           |
| SLC26A4-AS1 | PLAU     | -0.48861218  | 0           |
| SLC26A4-AS1 | LRRK2    | -0.099719872 | 0.036778275 |
| SLC26A4-AS1 | SFN      | -0.617687799 | 0           |
| SLC26A4-AS1 | LPAR5    | -0.547200844 | 0           |
| SLC26A4-AS1 | NGEF     | -0.689934386 | 0           |
| SLC26A4-AS1 | DTX4     | -0.502694196 | 0           |
| SLC26A4-AS1 | CST6     | -0.567255054 | 0           |
| SLC26A4-AS1 | QPCT     | -0.394365378 | 0           |
| SLC26A4-AS1 | TIMP1    | -0.53635158  | 0           |
| SLC26A4-AS1 | CAMK2N1  | -0.555582851 | 0           |
| SLC26A4-AS1 | KLHDC8A  | -0.229578148 | 1.25E-06    |
| SLC26A4-AS1 | PDLIM4   | -0.713002777 | 0           |
| SLC26A4-AS1 | SCEL     | -0.492338384 | 0           |
| SLC26A4-AS1 | LCN2     | -0.647387927 | 0           |
| SLC26A4-AS1 | PROS1    | -0.658814894 | 0           |
| SLC26A4-AS1 | GABRB2   | -0.553847474 | 0           |
| SLC26A4-AS1 | TMPRSS6  | -0.676994585 | 0           |
| SLC26A4-AS1 | KLK7     | -0.59240594  | 6.17E-43    |
| SLC26A4-AS1 | PDZK1IP1 | -0.431568832 | 0           |
| SLC26A4-AS1 | CDH3     | -0.559455147 | 0           |
| SLC26A4-AS1 | LRP4     | -0.302076779 | 1.28E-10    |
| SLC26A4-AS1 | IGSF1    | -0.355473779 | 2.11E-14    |
| SLC26A4-AS1 | B3GNT3   | -0.732440138 | 0           |
| SLC26A4-AS1 | CLDN1    | -0.58908308  | 0           |
| SLC26A4-AS1 | GDF15    | -0.650588482 | 0           |
| SLC26A4-AS1 | ARHGAP36 | -0.274512468 | 4.98E-09    |
| SLC26A4-AS1 | LAMB3    | -0.65903077  | 0           |
| SLC26A4-AS1 | KLK10    | -0.635605517 | 0           |
| SLC26A4-AS1 | DPP4     | -0.525546144 | 0           |
| SLC26A4-AS1 | METTL7B  | -0.450883078 | 0           |
| SLC26A4-AS1 | LIPH     | -0.58789803  | 0           |
| SLC26A4-AS1 | CLDN16   | -0.551530139 | 0           |
| SLC26A4-AS1 | CHI3L1   | -0.438661398 | 0           |
| SLC26A4-AS1 | SLC22A31 | -0.485959147 | 2.13E-27    |
| SLC26A4-AS1 | TACSTD2  | -0.647114749 | 0           |
| SLC26A4-AS1 | SFTPB    | -0.534130553 | 0           |
| SLC26A4-AS1 | RXRG     | -0.265324651 | 1.88E-08    |
| SLC26A4-AS1 | DCSTAMP  | -0.636834688 | 2.62E-51    |

|             |           |              |          |
|-------------|-----------|--------------|----------|
| SLC26A4-AS1 | CITED1    | -0.293692077 | 4.25E-10 |
| SLC26A4-AS1 | SERPINA1  | -0.628497065 | 0        |
| SLC26A4-AS1 | PRR15     | -0.374630727 | 3.46E-16 |
| SLC26A4-AS1 | SLC34A2   | -0.647884641 | 0        |
| SLC26A4-AS1 | FN1       | -0.716950105 | 0        |
| SLC26A4-AS1 | ZCCHC12   | -0.317609222 | 1.24E-11 |
| AC068138.1  | TFF3      | 0.730427636  | 2.27E-74 |
| AC068138.1  | CCL21     | 0.517785152  | 1.77E-31 |
| AC068138.1  | TPO       | 0.736875954  | 2.56E-76 |
| AC068138.1  | MT1G      | 0.666985435  | 8.06E-58 |
| AC068138.1  | DIO1      | 0.663910849  | 4.03E-57 |
| AC068138.1  | DPT       | 0.468434313  | 2.51E-25 |
| AC068138.1  | CDH16     | 0.731229615  | 1.31E-74 |
| AC068138.1  | CRABP1    | 0.588194978  | 3.29E-42 |
| AC068138.1  | SLC26A7   | 0.701295381  | 3.16E-66 |
| AC068138.1  | MT1H      | 0.625863008  | 4.10E-49 |
| AC068138.1  | SLC26A4   | 0.740385005  | 2.10E-77 |
| AC068138.1  | SLC5A8    | 0.725025653  | 8.82E-73 |
| AC068138.1  | PKHD1L1   | 0.701477188  | 2.83E-66 |
| AC068138.1  | TFCP2L1   | 0.696650452  | 5.10E-65 |
| AC068138.1  | WSCD2     | 0.744754217  | 8.87E-79 |
| AC068138.1  | IPCEF1    | 0.754284045  | 7.06E-82 |
| AC068138.1  | SLC5A5    | 0.620824466  | 3.90E-48 |
| AC068138.1  | MT1F      | 0.656837429  | 1.52E-55 |
| AC068138.1  | FOSB      | 0.437917577  | 5.40E-22 |
| AC068138.1  | SEMA3D    | 0.757677237  | 5.14E-83 |
| AC068138.1  | BMP8A     | 0.698273418  | 1.94E-65 |
| AC068138.1  | MATN2     | 0.720596932  | 1.66E-71 |
| AC068138.1  | PLA2R1    | 0.731026638  | 1.50E-74 |
| AC068138.1  | COL23A1   | 0.731983652  | 7.78E-75 |
| AC068138.1  | HGD       | 0.778144852  | 2.65E-90 |
| AC068138.1  | TCEAL2    | 0.62822049   | 1.41E-49 |
| AC068138.1  | CHRD1     | 0.484117305  | 3.56E-27 |
| AC068138.1  | TNFRSF11B | 0.617166817  | 1.95E-47 |
| AC068138.1  | FAM167A   | 0.667775784  | 5.31E-58 |
| AC068138.1  | KIT       | 0.730498273  | 2.16E-74 |
| AC068138.1  | SLC4A4    | 0.786988329  | 1.07E-93 |
| AC068138.1  | SMOC2     | 0.566156718  | 1.43E-38 |
| AC068138.1  | FHL1      | 0.723144572  | 3.09E-72 |
| AC068138.1  | OTOS      | 0.670817604  | 1.06E-58 |
| AC068138.1  | IGFBPL1   | 0.723154603  | 3.07E-72 |
| AC068138.1  | HBB       | 0.346313894  | 8.16E-14 |
| AC068138.1  | BEX1      | 0.57203029   | 1.63E-39 |
| AC068138.1  | FABP4     | 0.548686152  | 7.09E-36 |
| AC068138.1  | LMOD1     | 0.708525395  | 3.74E-68 |
| AC068138.1  | SOD3      | 0.600070922  | 2.75E-44 |
| AC068138.1  | TMEM171   | 0.589672989  | 1.84E-42 |
| AC068138.1  | PI16      | 0.497911861  | 7.01E-29 |
| AC068138.1  | ZMAT4     | 0.75818163   | 3.47E-83 |
| AC068138.1  | MFAP4     | 0.388096405  | 3.13E-17 |
| AC068138.1  | CWH43     | 0.683301077  | 1.13E-61 |



|            |            |             |          |
|------------|------------|-------------|----------|
| AC068138.1 | SPX        | 0.699091001 | 1.19E-65 |
| AC068138.1 | APOD       | 0.265818778 | 1.55E-08 |
| AC068138.1 | DPP6       | 0.755854813 | 2.11E-82 |
| AC068138.1 | MMRN1      | 0.52773489  | 7.60E-33 |
| AC068138.1 | WDR72      | 0.659953434 | 3.11E-56 |
| AC068138.1 | MPPED2     | 0.766938698 | 3.21E-86 |
| AC068138.1 | PAPSS2     | 0.586154435 | 7.35E-42 |
| AC068138.1 | DCN        | 0.298608876 | 1.71E-10 |
| AC068138.1 | SORBS2     | 0.799619294 | 7.77E-99 |
| AC068138.1 | EGR2       | 0.464982047 | 6.21E-25 |
| AC068138.1 | EDN3       | 0.576413101 | 3.14E-40 |
| AC068138.1 | DIO2       | 0.710818285 | 8.90E-69 |
| AC068138.1 | ITPR1      | 0.796022727 | 2.46E-97 |
| AC068138.1 | CFD        | 0.334343066 | 6.32E-13 |
| AC068138.1 | CPXM1      | 0.565268498 | 1.98E-38 |
| AC068138.1 | ELMO1      | 0.752066048 | 3.83E-81 |
| AC068138.1 | GPC3       | 0.534974356 | 7.20E-34 |
| AC068138.1 | MYOC       | 0.315372755 | 1.36E-11 |
| AC068138.1 | DEPTOR     | 0.651664562 | 2.03E-54 |
| AC068138.1 | DGKI       | 0.681617804 | 2.90E-61 |
| AC068138.1 | CARTPT     | 0.744273622 | 1.26E-78 |
| AC068138.1 | IYD        | 0.584627213 | 1.33E-41 |
| AC068138.1 | LYVE1      | 0.482501626 | 5.58E-27 |
| AC068138.1 | CLCNKB     | 0.676421816 | 5.11E-60 |
| AC068138.1 | NCAM1      | 0.524453356 | 2.17E-32 |
| AC068138.1 | HBA2       | 0.274765091 | 4.81E-09 |
| AC068138.1 | GLT8D2     | 0.647214951 | 1.82E-53 |
| AC068138.1 | OGDHL      | 0.569252155 | 4.58E-39 |
| AC068138.1 | LIFR       | 0.612678199 | 1.37E-46 |
| AC068138.1 | CSGALNACT1 | 0.576436496 | 3.11E-40 |
| AC068138.1 | RAP1GAP    | 0.536353972 | 4.57E-34 |
| AC068138.1 | COL9A3     | 0.68887179  | 4.78E-63 |
| AC068138.1 | FBLN1      | 0.316219661 | 1.19E-11 |
| AC068138.1 | EFEMP1     | 0.523439037 | 2.99E-32 |
| AC068138.1 | AOX1       | 0.623185941 | 1.36E-48 |
| AC068138.1 | GRIN2C     | 0.726015613 | 4.54E-73 |
| AC068138.1 | C11orf74   | 0.629473671 | 7.95E-50 |
| AC068138.1 | PPARGC1A   | 0.67361815  | 2.34E-59 |
| AC068138.1 | ANGPTL1    | 0.650266417 | 4.07E-54 |
| AC068138.1 | SCARA5     | 0.450466955 | 2.52E-23 |
| AC068138.1 | LTF        | 0.653437314 | 8.41E-55 |
| AC068138.1 | CA4        | 0.579463841 | 9.81E-41 |
| AC068138.1 | TG         | 0.605755558 | 2.59E-45 |
| AC068138.1 | FCGBP      | 0.625083776 | 5.82E-49 |
| AC068138.1 | PBX4       | 0.646010138 | 3.27E-53 |
| AC068138.1 | CYR61      | 0.454718864 | 8.69E-24 |
| AC068138.1 | FOS        | 0.448327141 | 4.29E-23 |
| AC068138.1 | KHDRBS2    | 0.702112537 | 1.93E-66 |
| AC068138.1 | MUM1L1     | 0.578427119 | 1.46E-40 |
| AC068138.1 | RGS16      | 0.697814273 | 2.56E-65 |
| AC068138.1 | MT1M       | 0.547856294 | 9.43E-36 |

|            |          |             |           |
|------------|----------|-------------|-----------|
| AC068138.1 | LRP2     | 0.668273794 | 4.08E-58  |
| AC068138.1 | MAFB     | 0.658312312 | 7.19E-56  |
| AC068138.1 | KCNK2    | 0.5760104   | 3.65E-40  |
| AC068138.1 | TBC1D4   | 0.744479157 | 1.09E-78  |
| AC068138.1 | MIOX     | 0.664490798 | 2.98E-57  |
| AC068138.1 | TPPP     | 0.621030049 | 3.56E-48  |
| AC068138.1 | FMOD     | 0.690369083 | 2.02E-63  |
| AC068138.1 | CITED2   | 0.474786509 | 4.60E-26  |
| AC068138.1 | RGS8     | 0.732445121 | 5.66E-75  |
| AC068138.1 | ABI3BP   | 0.519695095 | 9.73E-32  |
| AC068138.1 | ADH1B    | 0.463033478 | 1.03E-24  |
| AC068138.1 | OGN      | 0.385002553 | 5.84E-17  |
| AC068138.1 | NR4A1    | 0.376915358 | 2.88E-16  |
| AC068138.1 | FOXJ1    | 0.700342995 | 5.62E-66  |
| AC068138.1 | ALDH1A1  | 0.66300036  | 6.47E-57  |
| AC068138.1 | OCA2     | 0.628613139 | 1.18E-49  |
| AC068138.1 | TMEM139  | 0.456348071 | 5.75E-24  |
| AC068138.1 | ARHGAP24 | 0.743029807 | 3.12E-78  |
| AC068138.1 | SLC25A15 | 0.654898154 | 4.05E-55  |
| AC068138.1 | DES      | 0.323069406 | 4.02E-12  |
| AC068138.1 | GDF10    | 0.596834092 | 1.03E-43  |
| AC068138.1 | KIAA1324 | 0.790805604 | 3.27E-95  |
| AC068138.1 | JUN      | 0.477457552 | 2.23E-26  |
| AC068138.1 | C7       | 0.280619939 | 2.18E-09  |
| AC068138.1 | LGI3     | 0.67595416  | 6.59E-60  |
| AC068138.1 | CDON     | 0.775681041 | 2.20E-89  |
| AC068138.1 | BCL2     | 0.719168007 | 4.23E-71  |
| AC068138.1 | HLF      | 0.714845488 | 6.91E-70  |
| AC068138.1 | EGR1     | 0.498242496 | 6.36E-29  |
| AC068138.1 | IP6K3    | 0.608708869 | 7.45E-46  |
| AC068138.1 | SCUBE3   | 0.627619927 | 1.85E-49  |
| AC068138.1 | PKNOX2   | 0.693693312 | 2.92E-64  |
| AC068138.1 | SMAD9    | 0.596431943 | 1.22E-43  |
| AC068138.1 | IQGAP2   | 0.650404572 | 3.80E-54  |
| AC068138.1 | GNA14    | 0.706945407 | 9.98E-68  |
| AC068138.1 | LAYN     | 0.600126241 | 2.69E-44  |
| AC068138.1 | AVPR1A   | 0.660405203 | 2.47E-56  |
| AC068138.1 | PDLIM3   | 0.563785389 | 3.39E-38  |
| AC068138.1 | GPM6A    | 0.611824873 | 1.97E-46  |
| AC068138.1 | SDPR     | 0.560904419 | 9.60E-38  |
| AC068138.1 | CRYAB    | 0.274115025 | 5.25E-09  |
| AC068138.1 | FOXA2    | 0.547841637 | 9.48E-36  |
| AC068138.1 | C8orf88  | 0.692540555 | 5.72E-64  |
| AC068138.1 | ISM1     | 0.650764711 | 3.18E-54  |
| AC068138.1 | BMP2     | 0.408358942 | 4.51E-19  |
| AC068138.1 | ID4      | 0.605408043 | 3.00E-45  |
| AC068138.1 | NUPR1    | 0.392765021 | 1.21E-17  |
| AC068138.1 | SERTM1   | 0.591842575 | 7.73E-43  |
| AC068138.1 | IRS1     | 0.837992045 | 5.02E-117 |
| AC068138.1 | FIBIN    | 0.418945526 | 4.37E-20  |
| AC068138.1 | PODN     | 0.345360427 | 9.64E-14  |

|            |          |             |          |
|------------|----------|-------------|----------|
| AC068138.1 | TDRD9    | 0.48431991  | 3.37E-27 |
| AC068138.1 | EPHA3    | 0.529976859 | 3.68E-33 |
| AC068138.1 | AIF1L    | 0.469322438 | 1.98E-25 |
| AC068138.1 | EBF4     | 0.687118186 | 1.30E-62 |
| AC068138.1 | ADM2     | 0.573942331 | 7.97E-40 |
| AC068138.1 | GSTM3    | 0.59523408  | 1.98E-43 |
| AC068138.1 | HSD17B6  | 0.424560376 | 1.23E-20 |
| AC068138.1 | AGR3     | 0.441014416 | 2.56E-22 |
| AC068138.1 | EPHB1    | 0.560104141 | 1.28E-37 |
| AC068138.1 | TMOD1    | 0.490704683 | 5.58E-28 |
| AC068138.1 | WASF3    | 0.751600946 | 5.44E-81 |
| AC068138.1 | SELV     | 0.756070064 | 1.79E-82 |
| AC068138.1 | ENPP1    | 0.517536956 | 1.91E-31 |
| AC068138.1 | SYNE1    | 0.789388622 | 1.20E-94 |
| AC068138.1 | PLCH1    | 0.74410994  | 1.42E-78 |
| AC068138.1 | CCDC146  | 0.714785488 | 7.18E-70 |
| AC068138.1 | SLC16A2  | 0.785516709 | 4.03E-93 |
| AC068138.1 | IER2     | 0.511843525 | 1.10E-30 |
| AC068138.1 | KCNAB1   | 0.690018447 | 2.47E-63 |
| AC068138.1 | SYNDIG1  | 0.593975083 | 3.29E-43 |
| AC068138.1 | C16orf89 | 0.624619099 | 7.17E-49 |
| AC068138.1 | CTGF     | 0.362131501 | 4.75E-15 |
| AC068138.1 | NR4A3    | 0.27580948  | 4.18E-09 |
| AC068138.1 | KIAA1456 | 0.638318567 | 1.30E-51 |
| AC068138.1 | AQP4     | 0.646195385 | 2.99E-53 |
| AC068138.1 | RNF150   | 0.711035305 | 7.77E-69 |
| AC068138.1 | C1S      | 0.267520325 | 1.25E-08 |
| AC068138.1 | PFKFB2   | 0.614939458 | 5.14E-47 |
| AC068138.1 | PROX1    | 0.687248682 | 1.21E-62 |
| AC068138.1 | TCF7L1   | 0.694234443 | 2.12E-64 |
| AC068138.1 | HSPB6    | 0.417015045 | 6.73E-20 |
| AC068138.1 | FHDC1    | 0.608979789 | 6.64E-46 |
| AC068138.1 | PRR15L   | 0.50060035  | 3.19E-29 |
| AC068138.1 | SLC1A1   | 0.612055509 | 1.79E-46 |
| AC068138.1 | BTBD11   | 0.699307595 | 1.05E-65 |
| AC068138.1 | TRIM58   | 0.647622324 | 1.49E-53 |
| AC068138.1 | LRIG1    | 0.688130093 | 7.31E-63 |
| AC068138.1 | ROR2     | 0.511402677 | 1.26E-30 |
| AC068138.1 | GPR125   | 0.695488334 | 1.02E-64 |
| AC068138.1 | FLRT1    | 0.726732345 | 2.80E-73 |
| AC068138.1 | PGF      | 0.546567793 | 1.47E-35 |
| AC068138.1 | DUSP1    | 0.382933325 | 8.82E-17 |
| AC068138.1 | PLA2G7   | 0.441323791 | 2.38E-22 |
| AC068138.1 | PLSCR4   | 0.635175187 | 5.71E-51 |
| AC068138.1 | FAM46B   | 0.486310816 | 1.93E-27 |
| AC068138.1 | GLDC     | 0.55536815  | 6.89E-37 |
| AC068138.1 | ZBTB16   | 0.516666892 | 2.50E-31 |
| AC068138.1 | OMD      | 0.321106112 | 5.50E-12 |
| AC068138.1 | HSD11B2  | 0.588572714 | 2.84E-42 |
| AC068138.1 | FGL2     | 0.406358532 | 6.95E-19 |
| AC068138.1 | CLCNKA   | 0.732302682 | 6.24E-75 |

|            |          |             |             |
|------------|----------|-------------|-------------|
| AC068138.1 | GATM     | 0.577378759 | 2.17E-40    |
| AC068138.1 | TNS3     | 0.563356882 | 3.96E-38    |
| AC068138.1 | TOB1     | 0.431579187 | 2.42E-21    |
| AC068138.1 | MARC2    | 0.638710621 | 1.08E-51    |
| AC068138.1 | LRRC2    | 0.63554412  | 4.80E-51    |
| AC068138.1 | SORD     | 0.423777545 | 1.47E-20    |
| AC068138.1 | RIMS4    | 0.570813136 | 2.57E-39    |
| AC068138.1 | SLC29A4  | 0.610010419 | 4.28E-46    |
| AC068138.1 | SLC39A14 | 0.637685238 | 1.76E-51    |
| AC068138.1 | FAXDC2   | 0.663275252 | 5.61E-57    |
| AC068138.1 | HSPB8    | 0.390193268 | 2.05E-17    |
| AC068138.1 | CCL19    | 0.150461903 | 0.001569291 |
| AC068138.1 | KCNIP3   | 0.613434364 | 9.86E-47    |
| AC068138.1 | CGNL1    | 0.674909913 | 1.16E-59    |
| AC068138.1 | ATF3     | 0.156645303 | 0.000990971 |
| AC068138.1 | SGCD     | 0.479767889 | 1.18E-26    |
| AC068138.1 | STARD13  | 0.651975765 | 1.74E-54    |
| AC068138.1 | LDHD     | 0.63532781  | 5.31E-51    |
| AC068138.1 | RCAN1    | 0.436775174 | 7.09E-22    |
| AC068138.1 | ID3      | 0.405373859 | 8.58E-19    |
| AC068138.1 | SYTL3    | 0.587566055 | 4.22E-42    |
| AC068138.1 | MT1E     | 0.465886011 | 4.90E-25    |
| AC068138.1 | CAMK1D   | 0.654844112 | 4.16E-55    |
| AC068138.1 | PRKCQ    | 0.672308798 | 4.75E-59    |
| AC068138.1 | NUAK2    | 0.484562745 | 3.15E-27    |
| AC068138.1 | LIPG     | 0.639323098 | 8.11E-52    |
| AC068138.1 | SLC25A25 | 0.440402806 | 2.97E-22    |
| AC068138.1 | PRKX     | 0.348032037 | 6.04E-14    |
| AC068138.1 | SRPX     | 0.382263259 | 1.01E-16    |
| AC068138.1 | FAM189A1 | 0.608920782 | 6.81E-46    |
| AC068138.1 | PLEKHH1  | 0.707818876 | 5.81E-68    |
| AC068138.1 | WNT11    | 0.53763226  | 2.99E-34    |
| AC068138.1 | SNAI1    | 0.431445854 | 2.49E-21    |
| AC068138.1 | FDCSP    | 0.19397355  | 4.29E-05    |
| AC068138.1 | MT1X     | 0.44233045  | 1.87E-22    |
| AC068138.1 | ACACB    | 0.737480205 | 1.67E-76    |
| AC068138.1 | ARC      | 0.234979444 | 6.38E-07    |
| AC068138.1 | KLK4     | 0.326737163 | 2.22E-12    |
| AC068138.1 | ZFPM2    | 0.551745767 | 2.45E-36    |
| AC068138.1 | AKAP12   | 0.513781808 | 6.09E-31    |
| AC068138.1 | GJB6     | 0.408009641 | 4.86E-19    |
| AC068138.1 | ERO1LB   | 0.682542335 | 1.73E-61    |
| AC068138.1 | DNALI1   | 0.642262366 | 2.00E-52    |
| AC068138.1 | HKDC1    | 0.518589714 | 1.38E-31    |
| AC068138.1 | ZFP36L2  | 0.5701669   | 3.26E-39    |
| AC068138.1 | CAPSL    | 0.682493041 | 1.78E-61    |
| AC068138.1 | CYP7B1   | 0.689457175 | 3.41E-63    |
| AC068138.1 | CPQ      | 0.640769612 | 4.08E-52    |
| AC068138.1 | RPS6KA6  | 0.641971469 | 2.30E-52    |
| AC068138.1 | TLE1     | 0.5843753   | 1.47E-41    |
| AC068138.1 | TP53INP2 | 0.610803179 | 3.05E-46    |

|            |          |             |             |
|------------|----------|-------------|-------------|
| AC068138.1 | KATNAL2  | 0.681591421 | 2.94E-61    |
| AC068138.1 | SGPP2    | 0.434673631 | 1.17E-21    |
| AC068138.1 | CTH      | 0.637016307 | 2.41E-51    |
| AC068138.1 | KIF12    | 0.399493054 | 2.99E-18    |
| AC068138.1 | TMEM220  | 0.685815359 | 2.74E-62    |
| AC068138.1 | CENPJ    | 0.679166617 | 1.13E-60    |
| AC068138.1 | FAM155B  | 0.523890381 | 2.59E-32    |
| AC068138.1 | WFS1     | 0.619644386 | 6.57E-48    |
| AC068138.1 | SELENBP1 | 0.62457527  | 7.32E-49    |
| AC068138.1 | SNTA1    | 0.503655504 | 1.29E-29    |
| AC068138.1 | FRAS1    | 0.394057493 | 9.27E-18    |
| AC068138.1 | FBLN7    | 0.631249118 | 3.52E-50    |
| AC068138.1 | AGPAT9   | 0.570031156 | 3.43E-39    |
| AC068138.1 | GPR83    | 0.647245873 | 1.79E-53    |
| AC068138.1 | PRTG     | 0.645070713 | 5.16E-53    |
| AC068138.1 | EGR3     | 0.299269864 | 1.56E-10    |
| AC068138.1 | GRAMD2   | 0.485088415 | 2.72E-27    |
| AC068138.1 | HYOU1    | 0.639736144 | 6.66E-52    |
| AC068138.1 | FBLN5    | 0.411121474 | 2.47E-19    |
| AC068138.1 | ITM2A    | 0.586341384 | 6.83E-42    |
| AC068138.1 | SRF      | 0.533222082 | 1.28E-33    |
| AC068138.1 | FGFR2    | 0.478203646 | 1.82E-26    |
| AC068138.1 | MT1A     | 0.304235865 | 7.45E-11    |
| AC068138.1 | MAMDC2   | 0.457244518 | 4.58E-24    |
| AC068138.1 | FHL2     | 0.435870075 | 8.79E-22    |
| AC068138.1 | FTCDNL1  | 0.555631836 | 6.28E-37    |
| AC068138.1 | PKIA     | 0.426349298 | 8.13E-21    |
| AC068138.1 | DNAJB4   | 0.517192278 | 2.12E-31    |
| AC068138.1 | SLC25A33 | 0.564576305 | 2.54E-38    |
| AC068138.1 | EYA2     | 0.391549995 | 1.55E-17    |
| AC068138.1 | LPAR1    | 0.320821895 | 5.75E-12    |
| AC068138.1 | STX11    | 0.438728776 | 4.44E-22    |
| AC068138.1 | ARHGEF28 | 0.636311065 | 3.35E-51    |
| AC068138.1 | OR2W3    | 0.613653653 | 8.97E-47    |
| AC068138.1 | ALDH1B1  | 0.505902738 | 6.63E-30    |
| AC068138.1 | CXCL12   | 0.353506462 | 2.28E-14    |
| AC068138.1 | OLFM2    | 0.588606898 | 2.80E-42    |
| AC068138.1 | TUB      | 0.493311613 | 2.65E-28    |
| AC068138.1 | HTRA3    | 0.320824873 | 5.75E-12    |
| AC068138.1 | CKB      | 0.440463514 | 2.93E-22    |
| AC068138.1 | RGS2     | 0.170623066 | 0.000329254 |
| AC068138.1 | SHANK2   | 0.725331505 | 7.18E-73    |
| AC068138.1 | CNTFR    | 0.652533691 | 1.32E-54    |
| AC068138.1 | CYTH3    | 0.669469246 | 2.17E-58    |
| AC068138.1 | PLAC9    | 0.384028352 | 7.09E-17    |
| AC068138.1 | WVOX     | 0.646679353 | 2.36E-53    |
| AC068138.1 | NPR3     | 0.493053459 | 2.85E-28    |
| AC068138.1 | SDC2     | 0.557695366 | 3.02E-37    |
| AC068138.1 | KLF15    | 0.577698472 | 1.93E-40    |
| AC068138.1 | TMEM164  | 0.747055024 | 1.63E-79    |
| AC068138.1 | LONRF3   | 0.463423903 | 9.33E-25    |

|            |          |             |             |
|------------|----------|-------------|-------------|
| AC068138.1 | GBP1     | 0.351791866 | 3.10E-14    |
| AC068138.1 | ARHGAP6  | 0.532961374 | 1.39E-33    |
| AC068138.1 | TMEM119  | 0.266300901 | 1.46E-08    |
| AC068138.1 | SH3RF1   | 0.606289881 | 2.07E-45    |
| AC068138.1 | CRELD2   | 0.513751453 | 6.14E-31    |
| AC068138.1 | PCP4     | 0.096348043 | 0.043627083 |
| AC068138.1 | GCSH     | 0.644428448 | 7.04E-53    |
| AC068138.1 | IMPA2    | 0.522955353 | 3.49E-32    |
| AC068138.1 | C1R      | 0.245379362 | 1.93E-07    |
| AC068138.1 | SUCNR1   | 0.522776064 | 3.69E-32    |
| AC068138.1 | SFRP1    | 0.536609715 | 4.20E-34    |
| AC068138.1 | UGT8     | 0.530246502 | 3.38E-33    |
| AC068138.1 | TLE4     | 0.413146848 | 1.59E-19    |
| AC068138.1 | ANTXR1   | 0.534826466 | 7.56E-34    |
| AC068138.1 | GPX3     | 0.482633682 | 5.38E-27    |
| AC068138.1 | DPY19L2  | 0.632458896 | 2.02E-50    |
| AC068138.1 | FAM46C   | 0.574868423 | 5.63E-40    |
| AC068138.1 | IL33     | 0.374550638 | 4.55E-16    |
| AC068138.1 | PEG3     | 0.668352801 | 3.92E-58    |
| AC068138.1 | FAHD2A   | 0.559899179 | 1.38E-37    |
| AC068138.1 | PTGDS    | 0.1492099   | 0.001718846 |
| AC068138.1 | CHCHD10  | 0.371849014 | 7.65E-16    |
| AC068138.1 | CD36     | 0.555967578 | 5.58E-37    |
| AC068138.1 | ANKRD37  | 0.51313699  | 7.42E-31    |
| AC068138.1 | TSPAN33  | 0.59426884  | 2.92E-43    |
| AC068138.1 | PRDM16   | 0.639995291 | 5.89E-52    |
| AC068138.1 | UST      | 0.628092689 | 1.49E-49    |
| AC068138.1 | NEXN     | 0.597242717 | 8.75E-44    |
| AC068138.1 | NUPR1L   | 0.305698149 | 5.98E-11    |
| AC068138.1 | SLC24A3  | 0.661807178 | 1.20E-56    |
| AC068138.1 | MARC1    | 0.603846921 | 5.75E-45    |
| AC068138.1 | MYH11    | 0.372145608 | 7.23E-16    |
| AC068138.1 | APOA1    | 0.560411748 | 1.15E-37    |
| AC068138.1 | TMEM178B | 0.471870645 | 1.01E-25    |
| AC068138.1 | CAPN6    | 0.391134106 | 1.69E-17    |
| AC068138.1 | PPM1L    | 0.664887863 | 2.42E-57    |
| AC068138.1 | FZD8     | 0.665290413 | 1.96E-57    |
| AC068138.1 | RCAN2    | 0.642561087 | 1.73E-52    |
| AC068138.1 | COPZ2    | 0.576344157 | 3.22E-40    |
| AC068138.1 | GAS1     | 0.397260022 | 4.77E-18    |
| AC068138.1 | DACT1    | 0.581262984 | 4.92E-41    |
| AC068138.1 | WBSCR17  | 0.613075076 | 1.15E-46    |
| AC068138.1 | NCS1     | 0.436166952 | 8.19E-22    |
| AC068138.1 | SPIRE2   | 0.478221234 | 1.81E-26    |
| AC068138.1 | C15orf52 | 0.530565365 | 3.04E-33    |
| AC068138.1 | SPAG5    | 0.602547782 | 9.88E-45    |
| AC068138.1 | ARL4D    | 0.483883885 | 3.80E-27    |
| AC068138.1 | FAM189A2 | 0.564265811 | 2.85E-38    |
| AC068138.1 | MAP1LC3A | 0.556657785 | 4.37E-37    |
| AC068138.1 | KLF6     | 0.154544185 | 0.001160704 |
| AC068138.1 | ADD3     | 0.485473234 | 2.44E-27    |

|            |          |              |             |
|------------|----------|--------------|-------------|
| AC068138.1 | TSPAN7   | 0.427032697  | 6.95E-21    |
| AC068138.1 | KLF9     | 0.48624798   | 1.96E-27    |
| AC068138.1 | KCNQ1    | 0.59133482   | 9.47E-43    |
| AC068138.1 | MAN1A1   | 0.368694713  | 1.39E-15    |
| AC068138.1 | MLF1     | 0.366364376  | 2.16E-15    |
| AC068138.1 | RARB     | 0.691609782  | 9.83E-64    |
| AC068138.1 | CDC42EP2 | 0.54355349   | 4.10E-35    |
| AC068138.1 | FAM3B    | 0.311322394  | 2.54E-11    |
| AC068138.1 | GADD45B  | 0.301937928  | 1.05E-10    |
| AC068138.1 | TMEM47   | 0.582421414  | 3.14E-41    |
| AC068138.1 | SDF2L1   | 0.418121277  | 5.26E-20    |
| AC068138.1 | CCDC85A  | 0.442005205  | 2.02E-22    |
| AC068138.1 | CRYBG3   | 0.354891416  | 1.78E-14    |
| AC068138.1 | FBLN2    | 0.198759017  | 2.73E-05    |
| AC068138.1 | PEBP4    | 0.373638078  | 5.43E-16    |
| AC068138.1 | CDADC1   | 0.69163503   | 9.69E-64    |
| AC068138.1 | FAM63A   | 0.700083333  | 6.57E-66    |
| AC068138.1 | GLUL     | 0.445488298  | 8.64E-23    |
| AC068138.1 | FREM2    | 0.571369869  | 2.09E-39    |
| AC068138.1 | ACKR3    | 0.507656466  | 3.92E-30    |
| AC068138.1 | DENND6A  | 0.685840607  | 2.70E-62    |
| AC068138.1 | CLDN8    | 0.168474856  | 0.000392242 |
| AC068138.1 | UTS2R    | 0.264025585  | 1.95E-08    |
| AC068138.1 | SCNN1B   | 0.470796753  | 1.34E-25    |
| AC068138.1 | TTC30A   | 0.667362737  | 6.61E-58    |
| AC068138.1 | CORO2B   | 0.681124049  | 3.82E-61    |
| AC068138.1 | TC2N     | 0.400173049  | 2.59E-18    |
| AC068138.1 | ALDH2    | 0.639981816  | 5.93E-52    |
| AC068138.1 | GPR183   | 0.180618024  | 0.000141852 |
| AC068138.1 | C4orf47  | 0.583127792  | 2.39E-41    |
| AC068138.1 | SLC25A42 | 0.608911278  | 6.83E-46    |
| AC068138.1 | LGMN     | 0.6214265    | 2.98E-48    |
| AC068138.1 | ACSF2    | 0.620530479  | 4.44E-48    |
| AC068138.1 | KIAA1467 | 0.648207142  | 1.12E-53    |
| AC068138.1 | PRKG1    | 0.64962245   | 5.59E-54    |
| AC068138.1 | GNAI1    | 0.634079451  | 9.51E-51    |
| AC068138.1 | ABCC4    | 0.519723747  | 9.65E-32    |
| AC068138.1 | PRPS1    | 0.691401983  | 1.11E-63    |
| AC068138.1 | TSPAN5   | 0.497779663  | 7.28E-29    |
| AC068138.1 | CR2      | 0.352956304  | 2.52E-14    |
| AC068138.1 | CCDC170  | 0.589156397  | 2.25E-42    |
| AC068138.1 | RRAD     | 0.089248382  | 0.061711954 |
| AC068138.1 | SCGB2A1  | 0.515727183  | 3.34E-31    |
| AC068138.1 | SESN3    | 0.417442559  | 6.12E-20    |
| AC068138.1 | SGK223   | 0.402304663  | 1.65E-18    |
| AC068138.1 | NDRG2    | 0.701977928  | 2.09E-66    |
| AC068138.1 | C3orf52  | 0.326533481  | 2.29E-12    |
| AC068138.1 | FLRT3    | -0.229705159 | 1.15E-06    |
| AC068138.1 | MST1R    | -0.551977255 | 2.26E-36    |
| AC068138.1 | SDC1     | -0.396094357 | 6.08E-18    |
| AC068138.1 | ST8SIA4  | -0.38445459  | 6.51E-17    |

|            |          |              |             |
|------------|----------|--------------|-------------|
| AC068138.1 | UBTD1    | -0.4614625   | 1.55E-24    |
| AC068138.1 | EPHA2    | -0.391619356 | 1.53E-17    |
| AC068138.1 | TMEM130  | -0.239694868 | 3.73E-07    |
| AC068138.1 | SPINK2   | -0.410847859 | 2.63E-19    |
| AC068138.1 | MMP16    | -0.473173188 | 7.10E-26    |
| AC068138.1 | SIGLEC15 | -0.560856902 | 9.77E-38    |
| AC068138.1 | RIN1     | -0.564368931 | 2.74E-38    |
| AC068138.1 | IL1RN    | -0.499377239 | 4.57E-29    |
| AC068138.1 | FCER1G   | -0.221423379 | 2.81E-06    |
| AC068138.1 | CD276    | -0.54717715  | 1.19E-35    |
| AC068138.1 | CTSB     | -0.444790573 | 1.02E-22    |
| AC068138.1 | FAM171A2 | -0.168446487 | 0.000393144 |
| AC068138.1 | ASPHD1   | -0.553543767 | 1.31E-36    |
| AC068138.1 | C15orf48 | -0.278362793 | 2.97E-09    |
| AC068138.1 | DYSF     | -0.180516181 | 0.000143107 |
| AC068138.1 | PDZRN4   | -0.10593506  | 0.026452295 |
| AC068138.1 | EFHD2    | -0.181665391 | 0.000129528 |
| AC068138.1 | ASF1B    | -0.366640402 | 2.05E-15    |
| AC068138.1 | AQP1     | -0.159484997 | 0.000797838 |
| AC068138.1 | ARRDC2   | -0.531703228 | 2.10E-33    |
| AC068138.1 | PRSS1    | -0.328605611 | 1.64E-12    |
| AC068138.1 | MAPK13   | -0.392723745 | 1.22E-17    |
| AC068138.1 | CST5     | -0.58462094  | 1.34E-41    |
| AC068138.1 | AHR      | -0.440320395 | 3.03E-22    |
| AC068138.1 | BAX      | -0.500735668 | 3.07E-29    |
| AC068138.1 | C1orf115 | -0.369409459 | 1.22E-15    |
| AC068138.1 | PLK3     | -0.485514369 | 2.41E-27    |
| AC068138.1 | JAG2     | -0.316979229 | 1.06E-11    |
| AC068138.1 | RAD23B   | -0.467152952 | 3.52E-25    |
| AC068138.1 | CA12     | 0.181309082  | 0.000133603 |
| AC068138.1 | ADTRP    | -0.407083633 | 5.94E-19    |
| AC068138.1 | UCP2     | -0.506215626 | 6.03E-30    |
| AC068138.1 | IGFBP2   | -0.398915753 | 3.38E-18    |
| AC068138.1 | LOXL2    | -0.274406228 | 5.05E-09    |
| AC068138.1 | GPX1     | -0.456900408 | 5.00E-24    |
| AC068138.1 | P3H3     | -0.494189904 | 2.06E-28    |
| AC068138.1 | C2orf81  | -0.4360044   | 8.51E-22    |
| AC068138.1 | CDT1     | -0.473727652 | 6.11E-26    |
| AC068138.1 | SNX25    | -0.206336688 | 1.31E-05    |
| AC068138.1 | MTHFD1L  | -0.508205539 | 3.32E-30    |
| AC068138.1 | CDC42BPG | -0.556033058 | 5.45E-37    |
| AC068138.1 | MSN      | -0.550214006 | 4.18E-36    |
| AC068138.1 | SIGLEC6  | -0.450978322 | 2.22E-23    |
| AC068138.1 | F2R      | -0.140243729 | 0.003233512 |
| AC068138.1 | TMEM184A | -0.602933311 | 8.42E-45    |
| AC068138.1 | CKS2     | -0.301997077 | 1.04E-10    |
| AC068138.1 | TAX1BP3  | -0.644720077 | 6.12E-53    |
| AC068138.1 | PMEP1    | -0.42109629  | 2.69E-20    |
| AC068138.1 | CXCL16   | -0.495350746 | 1.47E-28    |
| AC068138.1 | FAXC     | -0.608173412 | 9.34E-46    |
| AC068138.1 | VTCN1    | -0.537606608 | 3.02E-34    |



|            |          |              |             |
|------------|----------|--------------|-------------|
| AC068138.1 | SH2D4A   | -0.48378346  | 3.91E-27    |
| AC068138.1 | RNF24    | -0.364863962 | 2.86E-15    |
| AC068138.1 | LY6G6C   | -0.556879116 | 4.04E-37    |
| AC068138.1 | NID1     | -0.285456355 | 1.12E-09    |
| AC068138.1 | STAC     | -0.564750772 | 2.39E-38    |
| AC068138.1 | RAB34    | -0.607539374 | 1.22E-45    |
| AC068138.1 | HES4     | -0.3958945   | 6.34E-18    |
| AC068138.1 | EPHA10   | -0.573092125 | 1.10E-39    |
| AC068138.1 | ENTPD2   | -0.496767898 | 9.77E-29    |
| AC068138.1 | DDB2     | -0.496375135 | 1.10E-28    |
| AC068138.1 | NKAIN4   | -0.331813724 | 9.64E-13    |
| AC068138.1 | TRIM29   | -0.555584035 | 6.39E-37    |
| AC068138.1 | ADCY8    | -0.473159747 | 7.12E-26    |
| AC068138.1 | SFTA2    | -0.412902027 | 1.67E-19    |
| AC068138.1 | NRIP1    | -0.368994001 | 1.32E-15    |
| AC068138.1 | VWA1     | -0.130635719 | 0.006123872 |
| AC068138.1 | APLNR    | -0.076450751 | 0.109688262 |
| AC068138.1 | REN      | -0.49816512  | 6.51E-29    |
| AC068138.1 | EDIL3    | -0.160796618 | 0.000720947 |
| AC068138.1 | AGRN     | -0.398218312 | 3.91E-18    |
| AC068138.1 | TREM1    | -0.347119704 | 7.09E-14    |
| AC068138.1 | SRL      | -0.286092662 | 1.03E-09    |
| AC068138.1 | RASGRF1  | -0.529036866 | 4.99E-33    |
| AC068138.1 | RMI2     | -0.493888204 | 2.24E-28    |
| AC068138.1 | SAMD1    | -0.599250361 | 3.85E-44    |
| AC068138.1 | MGAT4B   | -0.666929266 | 8.30E-58    |
| AC068138.1 | NXN      | -0.550914851 | 3.28E-36    |
| AC068138.1 | SH3BGRL3 | -0.527696025 | 7.69E-33    |
| AC068138.1 | CA11     | -0.312157139 | 2.24E-11    |
| AC068138.1 | PLD3     | -0.261895262 | 2.56E-08    |
| AC068138.1 | LURAP1L  | -0.400900986 | 2.22E-18    |
| AC068138.1 | CARNS1   | -0.316338809 | 1.17E-11    |
| AC068138.1 | PDLIM7   | -0.444284903 | 1.16E-22    |
| AC068138.1 | BCL2L1   | -0.611979056 | 1.84E-46    |
| AC068138.1 | GGT6     | -0.410752682 | 2.68E-19    |
| AC068138.1 | DPYSL3   | -0.150128049 | 0.001607957 |
| AC068138.1 | FYN      | -0.552228742 | 2.07E-36    |
| AC068138.1 | TK1      | -0.363759148 | 3.51E-15    |
| AC068138.1 | AK1      | -0.278882931 | 2.77E-09    |
| AC068138.1 | HIGD1B   | -0.10508301  | 0.027696782 |
| AC068138.1 | TMEM59L  | -0.412431393 | 1.86E-19    |
| AC068138.1 | MEGF9    | -0.333561086 | 7.21E-13    |
| AC068138.1 | ZFP36L1  | -0.381206955 | 1.24E-16    |
| AC068138.1 | ADRA1B   | -0.31371429  | 1.76E-11    |
| AC068138.1 | EPHA4    | -0.387779245 | 3.34E-17    |
| AC068138.1 | TCERG1L  | -0.216766252 | 4.57E-06    |
| AC068138.1 | NGFR     | -0.276047634 | 4.05E-09    |
| AC068138.1 | EBI3     | -0.463815389 | 8.42E-25    |
| AC068138.1 | S100A10  | -0.499439792 | 4.48E-29    |
| AC068138.1 | S100B    | -0.301543747 | 1.11E-10    |
| AC068138.1 | CD44     | -0.1804515   | 0.00014391  |

|            |          |              |             |
|------------|----------|--------------|-------------|
| AC068138.1 | BHLHE41  | -0.456021124 | 6.25E-24    |
| AC068138.1 | FBX02    | -0.403670043 | 1.24E-18    |
| AC068138.1 | SLC30A2  | -0.409974816 | 3.18E-19    |
| AC068138.1 | FRMD5    | -0.49070142  | 5.58E-28    |
| AC068138.1 | SAMD11   | -0.40828107  | 4.59E-19    |
| AC068138.1 | SIPA1L2  | -0.4021058   | 1.72E-18    |
| AC068138.1 | S100A16  | -0.59927107  | 3.82E-44    |
| AC068138.1 | PPL      | -0.551667044 | 2.52E-36    |
| AC068138.1 | ARHGDIB  | -0.206809592 | 1.25E-05    |
| AC068138.1 | CDC42EP3 | -0.455797012 | 6.61E-24    |
| AC068138.1 | RUNX2    | -0.377475211 | 2.58E-16    |
| AC068138.1 | LAMC2    | -0.484384165 | 3.31E-27    |
| AC068138.1 | BRINP1   | -0.498456395 | 5.98E-29    |
| AC068138.1 | GPRC5B   | -0.429091972 | 4.31E-21    |
| AC068138.1 | AQP5     | -0.160992645 | 0.000710064 |
| AC068138.1 | PLAG1    | -0.314470029 | 1.56E-11    |
| AC068138.1 | PTPRU    | -0.535184761 | 6.72E-34    |
| AC068138.1 | ANGPTL4  | -0.493558278 | 2.47E-28    |
| AC068138.1 | PALM3    | -0.503801318 | 1.24E-29    |
| AC068138.1 | ACP5     | -0.317427595 | 9.84E-12    |
| AC068138.1 | DLG4     | -0.269289814 | 9.90E-09    |
| AC068138.1 | ETNK2    | -0.519118504 | 1.17E-31    |
| AC068138.1 | CD109    | -0.493733312 | 2.35E-28    |
| AC068138.1 | SNX22    | -0.356129846 | 1.42E-14    |
| AC068138.1 | TMEM98   | -0.534029877 | 9.83E-34    |
| AC068138.1 | CTHRC1   | -0.352397535 | 2.79E-14    |
| AC068138.1 | S100A2   | -0.478039959 | 1.90E-26    |
| AC068138.1 | C11orf80 | -0.636989925 | 2.44E-51    |
| AC068138.1 | SREBF1   | -0.464825452 | 6.47E-25    |
| AC068138.1 | PRSS22   | -0.583916296 | 1.76E-41    |
| AC068138.1 | CMTM3    | -0.479235978 | 1.37E-26    |
| AC068138.1 | RDH5     | -0.467893655 | 2.89E-25    |
| AC068138.1 | MYH10    | -0.385378412 | 5.41E-17    |
| AC068138.1 | EVPL     | -0.551365061 | 2.80E-36    |
| AC068138.1 | SCD      | -0.41185934  | 2.10E-19    |
| AC068138.1 | CD151    | -0.610234105 | 3.89E-46    |
| AC068138.1 | S100A4   | -0.597134916 | 9.14E-44    |
| AC068138.1 | BNIP1    | -0.386356277 | 4.45E-17    |
| AC068138.1 | MAP3K6   | -0.546284675 | 1.62E-35    |
| AC068138.1 | MANEAL   | -0.507425971 | 4.20E-30    |
| AC068138.1 | CD207    | -0.325181949 | 2.86E-12    |
| AC068138.1 | CD1A     | -0.342307995 | 1.63E-13    |
| AC068138.1 | C3       | -0.319541053 | 7.05E-12    |
| AC068138.1 | NT5E     | -0.3990871   | 3.26E-18    |
| AC068138.1 | CACNG4   | -0.48866774  | 9.94E-28    |
| AC068138.1 | FHOD1    | -0.481648016 | 7.06E-27    |
| AC068138.1 | LEMD1    | -0.577847124 | 1.82E-40    |
| AC068138.1 | ATP11A   | -0.128147795 | 0.007178847 |
| AC068138.1 | PPAP2C   | -0.394099763 | 9.19E-18    |
| AC068138.1 | DRAM1    | -0.480635116 | 9.33E-27    |
| AC068138.1 | CDA      | -0.269043575 | 1.02E-08    |

|            |          |              |             |
|------------|----------|--------------|-------------|
| AC068138.1 | CCND2    | -0.229276935 | 1.20E-06    |
| AC068138.1 | LCN6     | -0.274917652 | 4.71E-09    |
| AC068138.1 | CDH4     | -0.359668826 | 7.48E-15    |
| AC068138.1 | MMP11    | -0.439444657 | 3.74E-22    |
| AC068138.1 | B3GAT1   | -0.395948401 | 6.27E-18    |
| AC068138.1 | SPP1     | -0.232234075 | 8.68E-07    |
| AC068138.1 | HLA-DQB1 | -0.294636709 | 3.05E-10    |
| AC068138.1 | SDC3     | -0.526795891 | 1.03E-32    |
| AC068138.1 | CX3CL1   | -0.351754561 | 3.12E-14    |
| AC068138.1 | SDK1     | -0.34999883  | 4.27E-14    |
| AC068138.1 | DOCK9    | -0.445516808 | 8.58E-23    |
| AC068138.1 | CSF2     | -0.510655713 | 1.58E-30    |
| AC068138.1 | GRHL3    | -0.562298025 | 5.81E-38    |
| AC068138.1 | TMEM92   | -0.589255433 | 2.17E-42    |
| AC068138.1 | BASP1    | -0.646326306 | 2.81E-53    |
| AC068138.1 | HRH1     | -0.535663765 | 5.74E-34    |
| AC068138.1 | ESM1     | -0.105016344 | 0.027796242 |
| AC068138.1 | B4GALNT3 | -0.484412392 | 3.28E-27    |
| AC068138.1 | LMO3     | -0.228392403 | 1.33E-06    |
| AC068138.1 | C9orf16  | -0.617235611 | 1.89E-47    |
| AC068138.1 | SEMA3F   | -0.314634425 | 1.52E-11    |
| AC068138.1 | PLA2G12B | -0.293859294 | 3.42E-10    |
| AC068138.1 | KLK6     | -0.506313209 | 5.86E-30    |
| AC068138.1 | ST3GAL5  | -0.434245549 | 1.29E-21    |
| AC068138.1 | FAM132B  | -0.199196318 | 2.62E-05    |
| AC068138.1 | CDKN1A   | -0.268155213 | 1.15E-08    |
| AC068138.1 | E2F1     | -0.474813601 | 4.56E-26    |
| AC068138.1 | B3GNT8   | -0.443977671 | 1.25E-22    |
| AC068138.1 | MTMR11   | -0.473549923 | 6.41E-26    |
| AC068138.1 | MYO1G    | -0.436040996 | 8.44E-22    |
| AC068138.1 | TMSB10   | -0.552311294 | 2.01E-36    |
| AC068138.1 | UNC5CL   | -0.55401582  | 1.11E-36    |
| AC068138.1 | ABR      | -0.397314915 | 4.72E-18    |
| AC068138.1 | PLP2     | -0.559954781 | 1.35E-37    |
| AC068138.1 | SRCIN1   | -0.443725759 | 1.33E-22    |
| AC068138.1 | PDE9A    | -0.664939352 | 2.36E-57    |
| AC068138.1 | TREM2    | -0.270944269 | 7.98E-09    |
| AC068138.1 | KDEL3    | -0.362452917 | 4.48E-15    |
| AC068138.1 | PC       | -0.595829253 | 1.55E-43    |
| AC068138.1 | C2CD4A   | -0.541847688 | 7.29E-35    |
| AC068138.1 | PELI1    | -0.479110731 | 1.42E-26    |
| AC068138.1 | SSX1     | -0.449063447 | 3.58E-23    |
| AC068138.1 | MROH6    | -0.616141435 | 3.05E-47    |
| AC068138.1 | ESPN     | -0.514835558 | 4.40E-31    |
| AC068138.1 | BMP1     | -0.406104917 | 7.33E-19    |
| AC068138.1 | TM4SF4   | -0.465066064 | 6.08E-25    |
| AC068138.1 | CORO2A   | -0.490272062 | 6.31E-28    |
| AC068138.1 | CD164L2  | -0.459064237 | 2.87E-24    |
| AC068138.1 | CTSS     | -0.316296256 | 1.18E-11    |
| AC068138.1 | CLU      | -0.491298579 | 4.71E-28    |
| AC068138.1 | TMSB4X   | -0.5111997   | 1.34E-30    |

|            |          |              |             |
|------------|----------|--------------|-------------|
| AC068138.1 | WNT10A   | -0.527895121 | 7.21E-33    |
| AC068138.1 | NAPSA    | -0.354662482 | 1.86E-14    |
| AC068138.1 | PLEKHA4  | -0.516554127 | 2.59E-31    |
| AC068138.1 | SFTPA1   | -0.018026822 | 0.706428071 |
| AC068138.1 | C1orf116 | -0.539548415 | 1.58E-34    |
| AC068138.1 | TM4SF1   | -0.489784832 | 7.24E-28    |
| AC068138.1 | SEL1L3   | -0.436642977 | 7.31E-22    |
| AC068138.1 | VASN     | -0.576649686 | 2.87E-40    |
| AC068138.1 | NPTXR    | -0.566167924 | 1.42E-38    |
| AC068138.1 | PDE4C    | -0.579684131 | 9.02E-41    |
| AC068138.1 | CDC42EP1 | -0.617911208 | 1.41E-47    |
| AC068138.1 | ENDOD1   | -0.583877006 | 1.79E-41    |
| AC068138.1 | RYR1     | -0.520843597 | 6.79E-32    |
| AC068138.1 | IL1RAP   | -0.474018572 | 5.65E-26    |
| AC068138.1 | SLC35F2  | -0.612141488 | 1.72E-46    |
| AC068138.1 | ISYNA1   | -0.464915664 | 6.32E-25    |
| AC068138.1 | HLA-G    | -0.448161894 | 4.47E-23    |
| AC068138.1 | CDKN2B   | -0.482666731 | 5.33E-27    |
| AC068138.1 | ALDH1A3  | -0.449133801 | 3.52E-23    |
| AC068138.1 | CLIP3    | -0.385104656 | 5.72E-17    |
| AC068138.1 | ULBP2    | -0.408028732 | 4.84E-19    |
| AC068138.1 | ETHE1    | -0.642544066 | 1.74E-52    |
| AC068138.1 | XPR1     | -0.408218234 | 4.65E-19    |
| AC068138.1 | SPTBN2   | -0.59313438  | 4.61E-43    |
| AC068138.1 | IVL      | -0.523188111 | 3.24E-32    |
| AC068138.1 | MARCO    | -0.422565214 | 1.93E-20    |
| AC068138.1 | PLXND1   | -0.299235822 | 1.56E-10    |
| AC068138.1 | EMILIN2  | -0.380419728 | 1.45E-16    |
| AC068138.1 | PLAUR    | -0.462691284 | 1.13E-24    |
| AC068138.1 | CDC42EP5 | -0.61855092  | 1.06E-47    |
| AC068138.1 | TRPC5    | -0.277298925 | 3.43E-09    |
| AC068138.1 | TMEM100  | -0.304442448 | 7.23E-11    |
| AC068138.1 | QSOX1    | -0.628492119 | 1.24E-49    |
| AC068138.1 | ARHGAP23 | -0.521955219 | 4.79E-32    |
| AC068138.1 | MDFI     | -0.335283342 | 5.40E-13    |
| AC068138.1 | FSTL3    | -0.620047929 | 5.50E-48    |
| AC068138.1 | INF2     | -0.617957591 | 1.38E-47    |
| AC068138.1 | TGFBR1   | -0.534044345 | 9.78E-34    |
| AC068138.1 | TGFBI    | -0.208128731 | 1.10E-05    |
| AC068138.1 | ERBB3    | -0.619341694 | 7.51E-48    |
| AC068138.1 | CCL18    | -0.344137174 | 1.19E-13    |
| AC068138.1 | CCL17    | -0.35213379  | 2.92E-14    |
| AC068138.1 | C16orf45 | -0.424341513 | 1.29E-20    |
| AC068138.1 | PRDM1    | -0.256276299 | 5.17E-08    |
| AC068138.1 | TRIM47   | -0.641476556 | 2.91E-52    |
| AC068138.1 | CNFN     | -0.516075265 | 3.00E-31    |
| AC068138.1 | ARMCX3   | -0.389972419 | 2.14E-17    |
| AC068138.1 | RAMP1    | -0.418571345 | 4.75E-20    |
| AC068138.1 | GABRD    | -0.146581268 | 0.002076202 |
| AC068138.1 | COL13A1  | -0.1878713   | 7.48E-05    |
| AC068138.1 | S100A5   | -0.562452208 | 5.50E-38    |

|            |           |              |             |
|------------|-----------|--------------|-------------|
| AC068138.1 | MISP      | -0.482612973 | 5.41E-27    |
| AC068138.1 | HES6      | -0.319183042 | 7.46E-12    |
| AC068138.1 | PSD3      | -0.422320677 | 2.04E-20    |
| AC068138.1 | DOK7      | -0.617229795 | 1.90E-47    |
| AC068138.1 | ZMAT3     | -0.468125001 | 2.72E-25    |
| AC068138.1 | MFAP2     | -0.363113196 | 3.96E-15    |
| AC068138.1 | TMEM79    | -0.575414377 | 4.58E-40    |
| AC068138.1 | SLC1A5    | -0.376113946 | 3.36E-16    |
| AC068138.1 | BBC3      | -0.546238434 | 1.64E-35    |
| AC068138.1 | HLA-DQB2  | -0.289687669 | 6.19E-10    |
| AC068138.1 | C1QL1     | -0.474114741 | 5.51E-26    |
| AC068138.1 | TMEM215   | -0.106969624 | 0.025006214 |
| AC068138.1 | PNP       | -0.451024141 | 2.20E-23    |
| AC068138.1 | ARNTL     | -0.462575541 | 1.16E-24    |
| AC068138.1 | CLDN2     | -0.216097755 | 4.90E-06    |
| AC068138.1 | MVP       | -0.597020024 | 9.58E-44    |
| AC068138.1 | LGALS1    | -0.484047855 | 3.63E-27    |
| AC068138.1 | BIRC7     | -0.536176623 | 4.84E-34    |
| AC068138.1 | COL8A1    | -0.430586428 | 3.05E-21    |
| AC068138.1 | PERP      | -0.620839554 | 3.87E-48    |
| AC068138.1 | GJA4      | -0.278876122 | 2.77E-09    |
| AC068138.1 | IGFL2     | -0.448851047 | 3.77E-23    |
| AC068138.1 | DAPK2     | -0.518157518 | 1.57E-31    |
| AC068138.1 | MAMLD1    | -0.478032867 | 1.90E-26    |
| AC068138.1 | ETV5      | -0.2584177   | 3.96E-08    |
| AC068138.1 | RUNX1     | -0.60076269  | 2.07E-44    |
| AC068138.1 | LONRF2    | -0.281122062 | 2.04E-09    |
| AC068138.1 | SPOCK1    | -0.201472329 | 2.11E-05    |
| AC068138.1 | XKRX      | -0.386211739 | 4.58E-17    |
| AC068138.1 | TGFB1     | -0.30505833  | 6.59E-11    |
| AC068138.1 | ERP27     | -0.191511981 | 5.38E-05    |
| AC068138.1 | TNFRSF10C | -0.342869524 | 1.48E-13    |
| AC068138.1 | PALM      | -0.663000927 | 6.46E-57    |
| AC068138.1 | TSC22D1   | -0.349756279 | 4.45E-14    |
| AC068138.1 | TGM2      | -0.455138152 | 7.81E-24    |
| AC068138.1 | UBE2QL1   | -0.281935673 | 1.82E-09    |
| AC068138.1 | ECE1      | -0.544105968 | 3.40E-35    |
| AC068138.1 | COL8A2    | -0.520273247 | 8.12E-32    |
| AC068138.1 | HIST3H2A  | -0.487071662 | 1.56E-27    |
| AC068138.1 | TNFRSF21  | -0.532327621 | 1.72E-33    |
| AC068138.1 | SOX4      | -0.568292163 | 6.53E-39    |
| AC068138.1 | ELF3      | -0.66383312  | 4.20E-57    |
| AC068138.1 | TPD52L1   | -0.591500776 | 8.87E-43    |
| AC068138.1 | INHBB     | -0.389609443 | 2.31E-17    |
| AC068138.1 | HPN       | -0.444767169 | 1.03E-22    |
| AC068138.1 | MMP7      | -0.419920962 | 3.51E-20    |
| AC068138.1 | RAB27A    | -0.496515418 | 1.05E-28    |
| AC068138.1 | IGF2BP2   | -0.475910188 | 3.39E-26    |
| AC068138.1 | ITGB4     | -0.502809837 | 1.66E-29    |
| AC068138.1 | PPP1R1B   | -0.529527926 | 4.26E-33    |
| AC068138.1 | NPDC1     | -0.429752251 | 3.70E-21    |

|            |            |              |             |
|------------|------------|--------------|-------------|
| AC068138.1 | CCL13      | -0.44917623  | 3.48E-23    |
| AC068138.1 | SPINT1     | -0.660003788 | 3.03E-56    |
| AC068138.1 | HEY2       | -0.297521793 | 2.01E-10    |
| AC068138.1 | CST2       | -0.502856878 | 1.64E-29    |
| AC068138.1 | ADM        | -0.356381901 | 1.36E-14    |
| AC068138.1 | VSTM2L     | -0.505896621 | 6.64E-30    |
| AC068138.1 | FAM84A     | -0.501143892 | 2.72E-29    |
| AC068138.1 | P4HA2      | -0.397254632 | 4.78E-18    |
| AC068138.1 | LPL        | -0.35011812  | 4.18E-14    |
| AC068138.1 | TMEM173    | -0.484754516 | 2.98E-27    |
| AC068138.1 | DHRS3      | -0.584610617 | 1.34E-41    |
| AC068138.1 | SCN1B      | -0.546739281 | 1.38E-35    |
| AC068138.1 | GLT1D1     | -0.294307066 | 3.20E-10    |
| AC068138.1 | PHYHIP     | -0.498650153 | 5.65E-29    |
| AC068138.1 | BHLHE40    | -0.495303512 | 1.49E-28    |
| AC068138.1 | BID        | -0.653225543 | 9.35E-55    |
| AC068138.1 | POSTN      | -0.26986598  | 9.18E-09    |
| AC068138.1 | ITGA3      | -0.616499588 | 2.61E-47    |
| AC068138.1 | RSPO4      | -0.50442259  | 1.03E-29    |
| AC068138.1 | ADAMTS9    | -0.165162541 | 0.000511684 |
| AC068138.1 | ABTB2      | -0.598243702 | 5.82E-44    |
| AC068138.1 | KCNQ3      | -0.605459391 | 2.93E-45    |
| AC068138.1 | ANXA1      | -0.496863075 | 9.51E-29    |
| AC068138.1 | S100A11    | -0.633912644 | 1.03E-50    |
| AC068138.1 | CEACAM6    | -0.525684236 | 1.47E-32    |
| AC068138.1 | IER5L      | -0.572219934 | 1.52E-39    |
| AC068138.1 | KRT80      | -0.572527733 | 1.35E-39    |
| AC068138.1 | CDH6       | -0.488711081 | 9.82E-28    |
| AC068138.1 | UNC5B      | -0.375134379 | 4.07E-16    |
| AC068138.1 | PLEKHN1    | -0.618826237 | 9.42E-48    |
| AC068138.1 | SYTL1      | -0.487300596 | 1.46E-27    |
| AC068138.1 | TMEM163    | -0.463054828 | 1.03E-24    |
| AC068138.1 | C4orf48    | -0.294311179 | 3.20E-10    |
| AC068138.1 | B3GNT7     | -0.343439449 | 1.34E-13    |
| AC068138.1 | BAIAP3     | -0.544365115 | 3.11E-35    |
| AC068138.1 | PHLDA2     | -0.543243706 | 4.55E-35    |
| AC068138.1 | GAP43      | -0.485154832 | 2.67E-27    |
| AC068138.1 | S100A1     | -0.57472346  | 5.94E-40    |
| AC068138.1 | PTPRE      | -0.586412021 | 6.64E-42    |
| AC068138.1 | CCND1      | -0.442544491 | 1.77E-22    |
| AC068138.1 | ST6GALNAC5 | -0.614277913 | 6.85E-47    |
| AC068138.1 | KRT17      | -0.290259154 | 5.71E-10    |
| AC068138.1 | HPCAL4     | -0.353951282 | 2.11E-14    |
| AC068138.1 | GABBR2     | -0.217133058 | 4.40E-06    |
| AC068138.1 | DIRAS3     | -0.330149198 | 1.27E-12    |
| AC068138.1 | SERINC2    | -0.535335824 | 6.39E-34    |
| AC068138.1 | PTCHD4     | -0.31989254  | 6.67E-12    |
| AC068138.1 | EPS8       | -0.400008653 | 2.68E-18    |
| AC068138.1 | LY6E       | -0.597221299 | 8.83E-44    |
| AC068138.1 | UPP1       | -0.637729352 | 1.72E-51    |
| AC068138.1 | AHNAK2     | -0.55971762  | 1.47E-37    |

|            |         |              |             |
|------------|---------|--------------|-------------|
| AC068138.1 | PLXNC1  | -0.318704606 | 8.05E-12    |
| AC068138.1 | TNC     | -0.441408897 | 2.33E-22    |
| AC068138.1 | DUSP4   | -0.433709383 | 1.47E-21    |
| AC068138.1 | NRCAM   | -0.423085352 | 1.72E-20    |
| AC068138.1 | NRP2    | -0.395499184 | 6.88E-18    |
| AC068138.1 | CTSC    | -0.528639139 | 5.68E-33    |
| AC068138.1 | AMIGO2  | -0.345198584 | 9.91E-14    |
| AC068138.1 | NAB2    | -0.48942526  | 8.02E-28    |
| AC068138.1 | TBC1D2  | -0.65000571  | 4.62E-54    |
| AC068138.1 | PHLDA3  | -0.560136624 | 1.26E-37    |
| AC068138.1 | PTP4A3  | -0.452576328 | 1.49E-23    |
| AC068138.1 | CRABP2  | -0.303276783 | 8.60E-11    |
| AC068138.1 | GOS2    | -0.376063166 | 3.40E-16    |
| AC068138.1 | S100A6  | -0.704409824 | 4.76E-67    |
| AC068138.1 | FOXQ1   | -0.471880149 | 1.00E-25    |
| AC068138.1 | LRG1    | -0.517379936 | 2.00E-31    |
| AC068138.1 | LAMP5   | -0.338427715 | 3.18E-13    |
| AC068138.1 | ALDH3B1 | -0.655406802 | 3.13E-55    |
| AC068138.1 | CDH2    | -0.151220097 | 0.001484627 |
| AC068138.1 | SCG5    | -0.20979581  | 9.31E-06    |
| AC068138.1 | ZCCHC16 | -0.287887036 | 7.98E-10    |
| AC068138.1 | GRB7    | -0.682341628 | 1.94E-61    |
| AC068138.1 | TIAM1   | -0.318894817 | 7.81E-12    |
| AC068138.1 | FXYD5   | -0.401934595 | 1.79E-18    |
| AC068138.1 | CLDN9   | -0.467817911 | 2.95E-25    |
| AC068138.1 | FAM43A  | -0.613236777 | 1.07E-46    |
| AC068138.1 | CHST2   | -0.523713645 | 2.74E-32    |
| AC068138.1 | HMGA2   | -0.395716204 | 6.58E-18    |
| AC068138.1 | GALNT7  | -0.44493426  | 9.89E-23    |
| AC068138.1 | CBLN1   | -0.416231789 | 8.02E-20    |
| AC068138.1 | STRA6   | -0.556627998 | 4.42E-37    |
| AC068138.1 | MUC21   | -0.609267564 | 5.87E-46    |
| AC068138.1 | PRR36   | -0.532634994 | 1.55E-33    |
| AC068138.1 | NFE2L3  | -0.468316489 | 2.59E-25    |
| AC068138.1 | NR1D1   | -0.435130081 | 1.05E-21    |
| AC068138.1 | MUC1    | -0.58752563  | 4.29E-42    |
| AC068138.1 | NAT8L   | -0.238367644 | 4.35E-07    |
| AC068138.1 | APOC1   | -0.296546623 | 2.32E-10    |
| AC068138.1 | EVA1A   | -0.660434565 | 2.43E-56    |
| AC068138.1 | ENTPD1  | -0.354695531 | 1.84E-14    |
| AC068138.1 | COL1A1  | -0.355322476 | 1.65E-14    |
| AC068138.1 | FNDC4   | -0.426012847 | 8.79E-21    |
| AC068138.1 | FRMD3   | -0.068243723 | 0.153449467 |
| AC068138.1 | SHROOM4 | -0.413317201 | 1.53E-19    |
| AC068138.1 | NELL2   | -0.347544665 | 6.58E-14    |
| AC068138.1 | EPHB3   | -0.660243786 | 2.68E-56    |
| AC068138.1 | TMC6    | -0.643536115 | 1.08E-52    |
| AC068138.1 | NOD1    | -0.482602193 | 5.42E-27    |
| AC068138.1 | GGCT    | -0.619640557 | 6.58E-48    |
| AC068138.1 | ICAM1   | -0.464716233 | 6.66E-25    |
| AC068138.1 | PRSS23  | -0.476718267 | 2.72E-26    |

|            |           |              |             |
|------------|-----------|--------------|-------------|
| AC068138.1 | CFI       | -0.452764553 | 1.42E-23    |
| AC068138.1 | CD55      | -0.613186706 | 1.10E-46    |
| AC068138.1 | RASD2     | -0.545780991 | 1.92E-35    |
| AC068138.1 | KLK11     | -0.382961812 | 8.77E-17    |
| AC068138.1 | ICAM5     | -0.50223977  | 1.97E-29    |
| AC068138.1 | ADORA1    | -0.476586211 | 2.82E-26    |
| AC068138.1 | ITGA2     | -0.456119279 | 6.09E-24    |
| AC068138.1 | ABCC3     | -0.465083748 | 6.05E-25    |
| AC068138.1 | MFGE8     | -0.504772375 | 9.28E-30    |
| AC068138.1 | STK32A    | -0.220793881 | 3.00E-06    |
| AC068138.1 | CYSLTR2   | -0.368541097 | 1.43E-15    |
| AC068138.1 | LAD1      | -0.715530021 | 4.46E-70    |
| AC068138.1 | MGAT3     | -0.576634651 | 2.88E-40    |
| AC068138.1 | IGFBP6    | -0.445204329 | 9.26E-23    |
| AC068138.1 | CYP2S1    | -0.568397552 | 6.28E-39    |
| AC068138.1 | KCNJ2     | -0.364984529 | 2.80E-15    |
| AC068138.1 | FAM20A    | -0.451027971 | 2.19E-23    |
| AC068138.1 | TGFA      | -0.449765711 | 3.01E-23    |
| AC068138.1 | MXRA8     | -0.610317367 | 3.76E-46    |
| AC068138.1 | C8orf4    | -0.374140628 | 4.93E-16    |
| AC068138.1 | CLDN10    | -0.501833143 | 2.22E-29    |
| AC068138.1 | PDE5A     | -0.547778138 | 9.69E-36    |
| AC068138.1 | APOE      | -0.27179561  | 7.13E-09    |
| AC068138.1 | SPOCK2    | -0.580168666 | 7.49E-41    |
| AC068138.1 | TENM1     | -0.178636337 | 0.000168236 |
| AC068138.1 | SLIT1     | -0.166761678 | 0.000450332 |
| AC068138.1 | CXCL14    | -0.25089322  | 9.97E-08    |
| AC068138.1 | ECM1      | -0.110755448 | 0.020280734 |
| AC068138.1 | DUSP5     | -0.645289009 | 4.64E-53    |
| AC068138.1 | SEZ6L2    | -0.439439551 | 3.75E-22    |
| AC068138.1 | THRSP     | -0.23577121  | 5.84E-07    |
| AC068138.1 | C19orf33  | -0.658882804 | 5.38E-56    |
| AC068138.1 | MPZL2     | -0.566096293 | 1.46E-38    |
| AC068138.1 | CTSH      | -0.583554739 | 2.03E-41    |
| AC068138.1 | CYP1B1    | -0.53739056  | 3.24E-34    |
| AC068138.1 | ALOX5     | -0.460929454 | 1.78E-24    |
| AC068138.1 | SYTL5     | -0.544435489 | 3.04E-35    |
| AC068138.1 | TNFRSF12A | -0.576131251 | 3.49E-40    |
| AC068138.1 | DUSP6     | -0.491324252 | 4.68E-28    |
| AC068138.1 | ALOX15B   | -0.518224468 | 1.54E-31    |
| AC068138.1 | SDC4      | -0.635748516 | 4.36E-51    |
| AC068138.1 | MDK       | -0.468676628 | 2.35E-25    |
| AC068138.1 | KRT19     | -0.659449182 | 4.03E-56    |
| AC068138.1 | MET       | -0.61982481  | 6.07E-48    |
| AC068138.1 | TESC      | -0.375365157 | 3.89E-16    |
| AC068138.1 | CXCL17    | -0.568772037 | 5.47E-39    |
| AC068138.1 | NPC2      | -0.504994784 | 8.69E-30    |
| AC068138.1 | COMP      | -0.432416627 | 1.99E-21    |
| AC068138.1 | TUSC3     | -0.436521276 | 7.53E-22    |
| AC068138.1 | TMPRSS4   | -0.668330389 | 3.96E-58    |
| AC068138.1 | LGALS3    | -0.703524867 | 8.17E-67    |



|            |          |              |             |
|------------|----------|--------------|-------------|
| AC068138.1 | CRLF1    | -0.4850765   | 2.73E-27    |
| AC068138.1 | CTXN1    | -0.597827535 | 6.89E-44    |
| AC068138.1 | PCSK1N   | -0.273929069 | 5.38E-09    |
| AC068138.1 | NMU      | -0.540967063 | 9.81E-35    |
| AC068138.1 | GALE     | -0.677146775 | 3.44E-60    |
| AC068138.1 | PCSK2    | -0.081560073 | 0.087850739 |
| AC068138.1 | GJB3     | -0.580999865 | 5.44E-41    |
| AC068138.1 | SLPI     | -0.548406644 | 7.80E-36    |
| AC068138.1 | AGR2     | -0.342413925 | 1.61E-13    |
| AC068138.1 | MRC2     | -0.42768716  | 5.97E-21    |
| AC068138.1 | GOLT1A   | -0.511374451 | 1.27E-30    |
| AC068138.1 | SLC27A6  | -0.501773267 | 2.26E-29    |
| AC068138.1 | KCNN4    | -0.59553039  | 1.75E-43    |
| AC068138.1 | ETV4     | -0.513176086 | 7.33E-31    |
| AC068138.1 | SYT12    | -0.664952969 | 2.34E-57    |
| AC068138.1 | PVRL4    | -0.653555611 | 7.93E-55    |
| AC068138.1 | PLCD3    | -0.658256993 | 7.40E-56    |
| AC068138.1 | PLAU     | -0.429427289 | 3.99E-21    |
| AC068138.1 | LRRK2    | -0.199617875 | 2.52E-05    |
| AC068138.1 | SFN      | -0.560287119 | 1.20E-37    |
| AC068138.1 | LPAR5    | -0.571773696 | 1.79E-39    |
| AC068138.1 | NGEF     | -0.629893668 | 6.56E-50    |
| AC068138.1 | DTX4     | -0.513437413 | 6.77E-31    |
| AC068138.1 | CST6     | -0.60150396  | 1.52E-44    |
| AC068138.1 | QPCT     | -0.469800449 | 1.75E-25    |
| AC068138.1 | TIMP1    | -0.557856216 | 2.86E-37    |
| AC068138.1 | CAMK2N1  | -0.554259081 | 1.02E-36    |
| AC068138.1 | KLHDC8A  | -0.128288361 | 0.007115165 |
| AC068138.1 | PDLIM4   | -0.667084442 | 7.65E-58    |
| AC068138.1 | SCEL     | -0.49185361  | 4.02E-28    |
| AC068138.1 | LCN2     | -0.604587482 | 4.22E-45    |
| AC068138.1 | PROS1    | -0.613661454 | 8.94E-47    |
| AC068138.1 | GABRB2   | -0.542445272 | 5.96E-35    |
| AC068138.1 | TMPRSS6  | -0.639427636 | 7.72E-52    |
| AC068138.1 | KLK7     | -0.494827194 | 1.71E-28    |
| AC068138.1 | PDZK1IP1 | -0.489721003 | 7.38E-28    |
| AC068138.1 | CDH3     | -0.459384785 | 2.65E-24    |
| AC068138.1 | LRP4     | -0.269034213 | 1.02E-08    |
| AC068138.1 | IGSF1    | -0.294040401 | 3.33E-10    |
| AC068138.1 | B3GNT3   | -0.659324219 | 4.29E-56    |
| AC068138.1 | CLDN1    | -0.526365256 | 1.18E-32    |
| AC068138.1 | GDF15    | -0.617957024 | 1.38E-47    |
| AC068138.1 | ARHGAP36 | -0.210563792 | 8.62E-06    |
| AC068138.1 | LAMB3    | -0.591945312 | 7.42E-43    |
| AC068138.1 | KLK10    | -0.512821532 | 8.17E-31    |
| AC068138.1 | DPP4     | -0.494065082 | 2.13E-28    |
| AC068138.1 | METTL7B  | -0.527548793 | 8.06E-33    |
| AC068138.1 | LIPH     | -0.616471929 | 2.64E-47    |
| AC068138.1 | CLDN16   | -0.514044075 | 5.62E-31    |
| AC068138.1 | CHI3L1   | -0.466990683 | 3.67E-25    |
| AC068138.1 | SLC22A31 | -0.575734791 | 4.06E-40    |

|               |           |              |          |
|---------------|-----------|--------------|----------|
| AC068138.1    | TACSTD2   | -0.652851929 | 1.13E-54 |
| AC068138.1    | SFTPB     | -0.467931243 | 2.86E-25 |
| AC068138.1    | RXRG      | -0.363596596 | 3.62E-15 |
| AC068138.1    | DCSTAMP   | -0.617251979 | 1.88E-47 |
| AC068138.1    | CITED1    | -0.421599406 | 2.40E-20 |
| AC068138.1    | SERPINA1  | -0.62404648  | 9.27E-49 |
| AC068138.1    | PRR15     | -0.398222    | 3.90E-18 |
| AC068138.1    | SLC34A2   | -0.628806159 | 1.08E-49 |
| AC068138.1    | FN1       | -0.651374777 | 2.35E-54 |
| AC068138.1    | ZCCHC12   | -0.24839863  | 1.35E-07 |
| LA16c-329F2.1 | TFF3      | 0.767555753  | 1.94E-86 |
| LA16c-329F2.1 | CCL21     | 0.465337434  | 5.66E-25 |
| LA16c-329F2.1 | TPO       | 0.720460944  | 1.82E-71 |
| LA16c-329F2.1 | MT1G      | 0.681449894  | 3.19E-61 |
| LA16c-329F2.1 | DI01      | 0.651384833  | 2.34E-54 |
| LA16c-329F2.1 | DPT       | 0.406917571  | 6.16E-19 |
| LA16c-329F2.1 | CDH16     | 0.710757116  | 9.25E-69 |
| LA16c-329F2.1 | CRABP1    | 0.693875371  | 2.62E-64 |
| LA16c-329F2.1 | SLC26A7   | 0.713354732  | 1.79E-69 |
| LA16c-329F2.1 | MT1H      | 0.643957166  | 8.84E-53 |
| LA16c-329F2.1 | SLC26A4   | 0.756340501  | 1.45E-82 |
| LA16c-329F2.1 | SLC5A8    | 0.715570383  | 4.34E-70 |
| LA16c-329F2.1 | PKHD1L1   | 0.613595577  | 9.20E-47 |
| LA16c-329F2.1 | TFCP2L1   | 0.649979363  | 4.69E-54 |
| LA16c-329F2.1 | WSCD2     | 0.732348533  | 6.05E-75 |
| LA16c-329F2.1 | IPCEF1    | 0.676937468  | 3.85E-60 |
| LA16c-329F2.1 | SLC5A5    | 0.585561992  | 9.27E-42 |
| LA16c-329F2.1 | MT1F      | 0.701470574  | 2.85E-66 |
| LA16c-329F2.1 | FOSB      | 0.392317926  | 1.33E-17 |
| LA16c-329F2.1 | SEMA3D    | 0.604256217  | 4.85E-45 |
| LA16c-329F2.1 | BMP8A     | 0.632929616  | 1.62E-50 |
| LA16c-329F2.1 | MATN2     | 0.717517102  | 1.24E-70 |
| LA16c-329F2.1 | PLA2R1    | 0.583996732  | 1.71E-41 |
| LA16c-329F2.1 | COL23A1   | 0.756253838  | 1.55E-82 |
| LA16c-329F2.1 | HGD       | 0.785879344  | 2.91E-93 |
| LA16c-329F2.1 | TCEAL2    | 0.587436155  | 4.44E-42 |
| LA16c-329F2.1 | CHRD1     | 0.365675423  | 2.46E-15 |
| LA16c-329F2.1 | TNFRSF11B | 0.523843632  | 2.63E-32 |
| LA16c-329F2.1 | FAM167A   | 0.71178161   | 4.85E-69 |
| LA16c-329F2.1 | KIT       | 0.642666918  | 1.64E-52 |
| LA16c-329F2.1 | SLC4A4    | 0.721165027  | 1.14E-71 |
| LA16c-329F2.1 | SMOC2     | 0.512074221  | 1.03E-30 |
| LA16c-329F2.1 | FHL1      | 0.702314508  | 1.71E-66 |
| LA16c-329F2.1 | OTOS      | 0.768985619  | 5.99E-87 |
| LA16c-329F2.1 | IGFBPL1   | 0.692809776  | 4.89E-64 |
| LA16c-329F2.1 | HBB       | 0.367167685  | 1.86E-15 |
| LA16c-329F2.1 | BEX1      | 0.595631114  | 1.68E-43 |
| LA16c-329F2.1 | FABP4     | 0.646115794  | 3.11E-53 |
| LA16c-329F2.1 | LMOD1     | 0.693232496  | 3.82E-64 |
| LA16c-329F2.1 | SOD3      | 0.679614655  | 8.83E-61 |
| LA16c-329F2.1 | TMEM171   | 0.627741617  | 1.75E-49 |

|               |            |             |           |
|---------------|------------|-------------|-----------|
| LA16c-329F2.1 | PI16       | 0.449698098 | 3.06E-23  |
| LA16c-329F2.1 | ZMAT4      | 0.755484352 | 2.81E-82  |
| LA16c-329F2.1 | MFAP4      | 0.349411019 | 4.73E-14  |
| LA16c-329F2.1 | CWH43      | 0.614861141 | 5.32E-47  |
| LA16c-329F2.1 | SPX        | 0.765204934 | 1.31E-85  |
| LA16c-329F2.1 | APOD       | 0.224726998 | 1.97E-06  |
| LA16c-329F2.1 | DPP6       | 0.701213422 | 3.32E-66  |
| LA16c-329F2.1 | MMRN1      | 0.489994766 | 6.83E-28  |
| LA16c-329F2.1 | WDR72      | 0.607041251 | 1.51E-45  |
| LA16c-329F2.1 | MPPED2     | 0.788221936 | 3.49E-94  |
| LA16c-329F2.1 | PAPSS2     | 0.513738119 | 6.17E-31  |
| LA16c-329F2.1 | DCN        | 0.189198773 | 6.64E-05  |
| LA16c-329F2.1 | SORBS2     | 0.671392322 | 7.76E-59  |
| LA16c-329F2.1 | EGR2       | 0.396154212 | 6.01E-18  |
| LA16c-329F2.1 | EDN3       | 0.661182304 | 1.65E-56  |
| LA16c-329F2.1 | DIO2       | 0.687181415 | 1.26E-62  |
| LA16c-329F2.1 | ITPR1      | 0.687744511 | 9.12E-63  |
| LA16c-329F2.1 | CFD        | 0.405453661 | 8.44E-19  |
| LA16c-329F2.1 | CPXM1      | 0.492290694 | 3.55E-28  |
| LA16c-329F2.1 | ELMO1      | 0.724456939 | 1.29E-72  |
| LA16c-329F2.1 | GPC3       | 0.548650008 | 7.18E-36  |
| LA16c-329F2.1 | MYOC       | 0.378790343 | 2.00E-16  |
| LA16c-329F2.1 | DEPTOR     | 0.622800558 | 1.62E-48  |
| LA16c-329F2.1 | DGKI       | 0.550578343 | 3.68E-36  |
| LA16c-329F2.1 | CARTPT     | 0.664697131 | 2.68E-57  |
| LA16c-329F2.1 | IYD        | 0.524806711 | 1.94E-32  |
| LA16c-329F2.1 | LYVE1      | 0.431971644 | 2.20E-21  |
| LA16c-329F2.1 | CLCNKB     | 0.784864779 | 7.23E-93  |
| LA16c-329F2.1 | NCAM1      | 0.483324279 | 4.44E-27  |
| LA16c-329F2.1 | HBA2       | 0.374068091 | 5.00E-16  |
| LA16c-329F2.1 | GLT8D2     | 0.58932742  | 2.10E-42  |
| LA16c-329F2.1 | OGDHL      | 0.615606122 | 3.85E-47  |
| LA16c-329F2.1 | LIFR       | 0.631576626 | 3.03E-50  |
| LA16c-329F2.1 | CSGALNACT1 | 0.424274394 | 1.31E-20  |
| LA16c-329F2.1 | RAP1GAP    | 0.627767006 | 1.73E-49  |
| LA16c-329F2.1 | COL9A3     | 0.687569625 | 1.01E-62  |
| LA16c-329F2.1 | FBLN1      | 0.216174892 | 4.86E-06  |
| LA16c-329F2.1 | EFEMP1     | 0.364995014 | 2.79E-15  |
| LA16c-329F2.1 | AOX1       | 0.590171091 | 1.51E-42  |
| LA16c-329F2.1 | GRIN2C     | 0.6980103   | 2.27E-65  |
| LA16c-329F2.1 | C11orf74   | 0.806577299 | 7.93E-102 |
| LA16c-329F2.1 | PPARGC1A   | 0.63199987  | 2.49E-50  |
| LA16c-329F2.1 | ANGPTL1    | 0.661157453 | 1.68E-56  |
| LA16c-329F2.1 | SCARA5     | 0.353057737 | 2.48E-14  |
| LA16c-329F2.1 | LTF        | 0.634423309 | 8.10E-51  |
| LA16c-329F2.1 | CA4        | 0.721422789 | 9.65E-72  |
| LA16c-329F2.1 | TG         | 0.664890338 | 2.42E-57  |
| LA16c-329F2.1 | FCGBP      | 0.671875279 | 5.99E-59  |
| LA16c-329F2.1 | PBX4       | 0.77427645  | 7.24E-89  |
| LA16c-329F2.1 | CYR61      | 0.422616169 | 1.91E-20  |
| LA16c-329F2.1 | FOS        | 0.396352075 | 5.77E-18  |

|               |          |             |           |
|---------------|----------|-------------|-----------|
| LA16c-329F2.1 | KHDRBS2  | 0.654622421 | 4.65E-55  |
| LA16c-329F2.1 | MUM1L1   | 0.497024812 | 9.07E-29  |
| LA16c-329F2.1 | RGS16    | 0.653219788 | 9.38E-55  |
| LA16c-329F2.1 | MT1M     | 0.598618784 | 4.99E-44  |
| LA16c-329F2.1 | LRP2     | 0.560947107 | 9.45E-38  |
| LA16c-329F2.1 | MAFB     | 0.540193126 | 1.27E-34  |
| LA16c-329F2.1 | KCNK2    | 0.517432567 | 1.97E-31  |
| LA16c-329F2.1 | TBC1D4   | 0.639315434 | 8.14E-52  |
| LA16c-329F2.1 | MIOX     | 0.807252759 | 4.00E-102 |
| LA16c-329F2.1 | TPPP     | 0.630579365 | 4.79E-50  |
| LA16c-329F2.1 | FMOD     | 0.555997254 | 5.52E-37  |
| LA16c-329F2.1 | CITED2   | 0.392937899 | 1.17E-17  |
| LA16c-329F2.1 | RGS8     | 0.703087845 | 1.07E-66  |
| LA16c-329F2.1 | ABI3BP   | 0.403526228 | 1.27E-18  |
| LA16c-329F2.1 | ADH1B    | 0.425894884 | 9.03E-21  |
| LA16c-329F2.1 | OGN      | 0.295503212 | 2.69E-10  |
| LA16c-329F2.1 | NR4A1    | 0.342519265 | 1.58E-13  |
| LA16c-329F2.1 | FOXJ1    | 0.724542586 | 1.22E-72  |
| LA16c-329F2.1 | ALDH1A1  | 0.674203971 | 1.71E-59  |
| LA16c-329F2.1 | OCA2     | 0.539013082 | 1.89E-34  |
| LA16c-329F2.1 | TMEM139  | 0.430921194 | 2.82E-21  |
| LA16c-329F2.1 | ARHGAP24 | 0.687382682 | 1.12E-62  |
| LA16c-329F2.1 | SLC25A15 | 0.528703702 | 5.56E-33  |
| LA16c-329F2.1 | DES      | 0.310588056 | 2.85E-11  |
| LA16c-329F2.1 | GDF10    | 0.589014045 | 2.38E-42  |
| LA16c-329F2.1 | KIAA1324 | 0.643403482 | 1.15E-52  |
| LA16c-329F2.1 | JUN      | 0.444741295 | 1.04E-22  |
| LA16c-329F2.1 | C7       | 0.188879638 | 6.83E-05  |
| LA16c-329F2.1 | LGI3     | 0.762542356 | 1.11E-84  |
| LA16c-329F2.1 | CDON     | 0.733168896 | 3.43E-75  |
| LA16c-329F2.1 | BCL2     | 0.601544471 | 1.50E-44  |
| LA16c-329F2.1 | HLF      | 0.740012992 | 2.75E-77  |
| LA16c-329F2.1 | EGR1     | 0.426458127 | 7.93E-21  |
| LA16c-329F2.1 | IP6K3    | 0.571443809 | 2.03E-39  |
| LA16c-329F2.1 | SCUBE3   | 0.526651594 | 1.08E-32  |
| LA16c-329F2.1 | PKNOX2   | 0.675079819 | 1.06E-59  |
| LA16c-329F2.1 | SMAD9    | 0.4283979   | 5.07E-21  |
| LA16c-329F2.1 | IQGAP2   | 0.578805329 | 1.26E-40  |
| LA16c-329F2.1 | GNA14    | 0.683782415 | 8.63E-62  |
| LA16c-329F2.1 | LAYN     | 0.60026396  | 2.54E-44  |
| LA16c-329F2.1 | AVPR1A   | 0.668235156 | 4.17E-58  |
| LA16c-329F2.1 | PDLIM3   | 0.507017564 | 4.74E-30  |
| LA16c-329F2.1 | GPM6A    | 0.633187619 | 1.44E-50  |
| LA16c-329F2.1 | SDPR     | 0.580275335 | 7.19E-41  |
| LA16c-329F2.1 | CRYAB    | 0.382728419 | 9.18E-17  |
| LA16c-329F2.1 | FOXA2    | 0.534565074 | 8.24E-34  |
| LA16c-329F2.1 | C8orf88  | 0.567636459 | 8.31E-39  |
| LA16c-329F2.1 | ISM1     | 0.525679296 | 1.47E-32  |
| LA16c-329F2.1 | BMP2     | 0.312448389 | 2.14E-11  |
| LA16c-329F2.1 | ID4      | 0.62059257  | 4.32E-48  |
| LA16c-329F2.1 | NUPR1    | 0.468127926 | 2.72E-25  |

|               |          |             |             |
|---------------|----------|-------------|-------------|
| LA16c-329F2.1 | SERTM1   | 0.501893568 | 2.18E-29    |
| LA16c-329F2.1 | IRS1     | 0.659828433 | 3.32E-56    |
| LA16c-329F2.1 | FIBIN    | 0.243985725 | 2.27E-07    |
| LA16c-329F2.1 | PODN     | 0.250851523 | 1.00E-07    |
| LA16c-329F2.1 | TDRD9    | 0.454046134 | 1.03E-23    |
| LA16c-329F2.1 | EPHA3    | 0.423737963 | 1.48E-20    |
| LA16c-329F2.1 | AIF1L    | 0.408700894 | 4.19E-19    |
| LA16c-329F2.1 | EBF4     | 0.695845573 | 8.22E-65    |
| LA16c-329F2.1 | ADM2     | 0.565478256 | 1.83E-38    |
| LA16c-329F2.1 | GSTM3    | 0.678437828 | 1.69E-60    |
| LA16c-329F2.1 | HSD17B6  | 0.455955837 | 6.35E-24    |
| LA16c-329F2.1 | AGR3     | 0.429874444 | 3.60E-21    |
| LA16c-329F2.1 | EPHB1    | 0.512637742 | 8.64E-31    |
| LA16c-329F2.1 | TMOD1    | 0.473526129 | 6.45E-26    |
| LA16c-329F2.1 | WASF3    | 0.635037041 | 6.09E-51    |
| LA16c-329F2.1 | SELV     | 0.698351239 | 1.86E-65    |
| LA16c-329F2.1 | ENPP1    | 0.435017042 | 1.08E-21    |
| LA16c-329F2.1 | SYNE1    | 0.646294016 | 2.85E-53    |
| LA16c-329F2.1 | PLCH1    | 0.642518556 | 1.77E-52    |
| LA16c-329F2.1 | CCDC146  | 0.72043286  | 1.85E-71    |
| LA16c-329F2.1 | SLC16A2  | 0.701126617 | 3.50E-66    |
| LA16c-329F2.1 | IER2     | 0.595740329 | 1.61E-43    |
| LA16c-329F2.1 | KCNAB1   | 0.682207024 | 2.09E-61    |
| LA16c-329F2.1 | SYNDIG1  | 0.597389618 | 8.24E-44    |
| LA16c-329F2.1 | C16orf89 | 0.815436484 | 8.12E-106   |
| LA16c-329F2.1 | CTGF     | 0.235348091 | 6.12E-07    |
| LA16c-329F2.1 | NR4A3    | 0.180263137 | 0.000146272 |
| LA16c-329F2.1 | KIAA1456 | 0.62597134  | 3.90E-49    |
| LA16c-329F2.1 | AQP4     | 0.578445203 | 1.45E-40    |
| LA16c-329F2.1 | RNF150   | 0.626508054 | 3.06E-49    |
| LA16c-329F2.1 | C1S      | 0.118834207 | 0.012717319 |
| LA16c-329F2.1 | PFKFB2   | 0.515414358 | 3.68E-31    |
| LA16c-329F2.1 | PROX1    | 0.601417384 | 1.58E-44    |
| LA16c-329F2.1 | TCF7L1   | 0.736308191 | 3.82E-76    |
| LA16c-329F2.1 | HSPB6    | 0.434202326 | 1.30E-21    |
| LA16c-329F2.1 | FHDC1    | 0.57224505  | 1.51E-39    |
| LA16c-329F2.1 | PRR15L   | 0.618047008 | 1.33E-47    |
| LA16c-329F2.1 | SLC1A1   | 0.477012642 | 2.51E-26    |
| LA16c-329F2.1 | BTBD11   | 0.798436239 | 2.44E-98    |
| LA16c-329F2.1 | TRIM58   | 0.460507978 | 1.98E-24    |
| LA16c-329F2.1 | LRIG1    | 0.585576804 | 9.21E-42    |
| LA16c-329F2.1 | ROR2     | 0.359790279 | 7.31E-15    |
| LA16c-329F2.1 | GPR125   | 0.600896698 | 1.96E-44    |
| LA16c-329F2.1 | FLRT1    | 0.770223011 | 2.16E-87    |
| LA16c-329F2.1 | PGF      | 0.646506466 | 2.57E-53    |
| LA16c-329F2.1 | DUSP1    | 0.322623402 | 4.31E-12    |
| LA16c-329F2.1 | PLA2G7   | 0.441181026 | 2.46E-22    |
| LA16c-329F2.1 | PLSCR4   | 0.480519013 | 9.64E-27    |
| LA16c-329F2.1 | FAM46B   | 0.449557395 | 3.16E-23    |
| LA16c-329F2.1 | GLDC     | 0.502997031 | 1.57E-29    |
| LA16c-329F2.1 | ZBTB16   | 0.434338206 | 1.26E-21    |

|               |          |             |             |
|---------------|----------|-------------|-------------|
| LA16c-329F2.1 | OMD      | 0.188291191 | 7.20E-05    |
| LA16c-329F2.1 | HSD11B2  | 0.759124067 | 1.66E-83    |
| LA16c-329F2.1 | FGL2     | 0.217487742 | 4.24E-06    |
| LA16c-329F2.1 | CLCNKA   | 0.827497189 | 1.31E-111   |
| LA16c-329F2.1 | GATM     | 0.618970088 | 8.84E-48    |
| LA16c-329F2.1 | TNS3     | 0.405944987 | 7.59E-19    |
| LA16c-329F2.1 | TOB1     | 0.348349222 | 5.71E-14    |
| LA16c-329F2.1 | MARC2    | 0.745990176 | 3.58E-79    |
| LA16c-329F2.1 | LRRC2    | 0.533110884 | 1.33E-33    |
| LA16c-329F2.1 | SORD     | 0.450143611 | 2.74E-23    |
| LA16c-329F2.1 | RIMS4    | 0.60123796  | 1.70E-44    |
| LA16c-329F2.1 | SLC29A4  | 0.674247232 | 1.67E-59    |
| LA16c-329F2.1 | SLC39A14 | 0.554367964 | 9.80E-37    |
| LA16c-329F2.1 | FAXDC2   | 0.688423913 | 6.18E-63    |
| LA16c-329F2.1 | HSPB8    | 0.295725294 | 2.61E-10    |
| LA16c-329F2.1 | CCL19    | 0.067341257 | 0.158973446 |
| LA16c-329F2.1 | KCNIP3   | 0.742679967 | 4.02E-78    |
| LA16c-329F2.1 | CGNL1    | 0.60078649  | 2.05E-44    |
| LA16c-329F2.1 | ATF3     | 0.094979228 | 0.046716645 |
| LA16c-329F2.1 | SGCD     | 0.325180737 | 2.86E-12    |
| LA16c-329F2.1 | STARD13  | 0.520772278 | 6.94E-32    |
| LA16c-329F2.1 | LDHD     | 0.793343271 | 3.08E-96    |
| LA16c-329F2.1 | RCAN1    | 0.315861572 | 1.26E-11    |
| LA16c-329F2.1 | ID3      | 0.443656804 | 1.35E-22    |
| LA16c-329F2.1 | SYTL3    | 0.731217493 | 1.32E-74    |
| LA16c-329F2.1 | MT1E     | 0.511585023 | 1.19E-30    |
| LA16c-329F2.1 | CAMK1D   | 0.606391066 | 1.98E-45    |
| LA16c-329F2.1 | PRKCQ    | 0.706043564 | 1.74E-67    |
| LA16c-329F2.1 | NUAK2    | 0.385731408 | 5.04E-17    |
| LA16c-329F2.1 | LIPG     | 0.60859409  | 7.82E-46    |
| LA16c-329F2.1 | SLC25A25 | 0.289959874 | 5.96E-10    |
| LA16c-329F2.1 | PRKX     | 0.237454807 | 4.82E-07    |
| LA16c-329F2.1 | SRPX     | 0.277120722 | 3.51E-09    |
| LA16c-329F2.1 | FAM189A1 | 0.721435653 | 9.57E-72    |
| LA16c-329F2.1 | PLEKHH1  | 0.568145798 | 6.89E-39    |
| LA16c-329F2.1 | WNT11    | 0.581148205 | 5.14E-41    |
| LA16c-329F2.1 | SNAI1    | 0.375464909 | 3.81E-16    |
| LA16c-329F2.1 | FDCSP    | 0.120055879 | 0.011822809 |
| LA16c-329F2.1 | MT1X     | 0.579955633 | 8.13E-41    |
| LA16c-329F2.1 | ACACB    | 0.699729657 | 8.13E-66    |
| LA16c-329F2.1 | ARC      | 0.239826334 | 3.68E-07    |
| LA16c-329F2.1 | KLK4     | 0.287970577 | 7.89E-10    |
| LA16c-329F2.1 | ZFPM2    | 0.370003163 | 1.09E-15    |
| LA16c-329F2.1 | AKAP12   | 0.309006838 | 3.63E-11    |
| LA16c-329F2.1 | GJB6     | 0.415021668 | 1.05E-19    |
| LA16c-329F2.1 | ERO1LB   | 0.586186139 | 7.26E-42    |
| LA16c-329F2.1 | DNALI1   | 0.647004032 | 2.02E-53    |
| LA16c-329F2.1 | HKDC1    | 0.404288322 | 1.08E-18    |
| LA16c-329F2.1 | ZFP36L2  | 0.471690323 | 1.06E-25    |
| LA16c-329F2.1 | CAPSL    | 0.717334171 | 1.39E-70    |
| LA16c-329F2.1 | CYP7B1   | 0.45558096  | 6.98E-24    |

|               |          |             |             |
|---------------|----------|-------------|-------------|
| LA16c-329F2.1 | CPQ      | 0.547692796 | 9.98E-36    |
| LA16c-329F2.1 | RPS6KA6  | 0.635188192 | 5.67E-51    |
| LA16c-329F2.1 | TLE1     | 0.497415433 | 8.10E-29    |
| LA16c-329F2.1 | TP53INP2 | 0.6143649   | 6.60E-47    |
| LA16c-329F2.1 | KATNAL2  | 0.762336833 | 1.31E-84    |
| LA16c-329F2.1 | SGPP2    | 0.200855423 | 2.24E-05    |
| LA16c-329F2.1 | CTH      | 0.539588756 | 1.56E-34    |
| LA16c-329F2.1 | KIF12    | 0.517225767 | 2.10E-31    |
| LA16c-329F2.1 | TMEM220  | 0.702416631 | 1.60E-66    |
| LA16c-329F2.1 | CENPJ    | 0.474853162 | 4.51E-26    |
| LA16c-329F2.1 | FAM155B  | 0.611445171 | 2.32E-46    |
| LA16c-329F2.1 | WFS1     | 0.603836853 | 5.78E-45    |
| LA16c-329F2.1 | SELENBP1 | 0.771829182 | 5.67E-88    |
| LA16c-329F2.1 | SNTA1    | 0.684037014 | 7.47E-62    |
| LA16c-329F2.1 | FRAS1    | 0.117232434 | 0.013980293 |
| LA16c-329F2.1 | FBLN7    | 0.598122068 | 6.11E-44    |
| LA16c-329F2.1 | AGPAT9   | 0.580937718 | 5.57E-41    |
| LA16c-329F2.1 | GPR83    | 0.592238497 | 6.60E-43    |
| LA16c-329F2.1 | PRTG     | 0.524256522 | 2.31E-32    |
| LA16c-329F2.1 | EGR3     | 0.227168451 | 1.52E-06    |
| LA16c-329F2.1 | GRAMD2   | 0.416336587 | 7.83E-20    |
| LA16c-329F2.1 | HYOU1    | 0.508201058 | 3.32E-30    |
| LA16c-329F2.1 | FBLN5    | 0.3590479   | 8.38E-15    |
| LA16c-329F2.1 | ITM2A    | 0.573153805 | 1.07E-39    |
| LA16c-329F2.1 | SRF      | 0.482017954 | 6.37E-27    |
| LA16c-329F2.1 | FGFR2    | 0.447443446 | 5.34E-23    |
| LA16c-329F2.1 | MT1A     | 0.36781384  | 1.65E-15    |
| LA16c-329F2.1 | MAMDC2   | 0.280178602 | 2.32E-09    |
| LA16c-329F2.1 | FHL2     | 0.401896371 | 1.80E-18    |
| LA16c-329F2.1 | FTCDNL1  | 0.567816592 | 7.77E-39    |
| LA16c-329F2.1 | PKIA     | 0.498010726 | 6.81E-29    |
| LA16c-329F2.1 | DNAJB4   | 0.403096176 | 1.40E-18    |
| LA16c-329F2.1 | SLC25A33 | 0.688472705 | 6.01E-63    |
| LA16c-329F2.1 | EYA2     | 0.380635178 | 1.39E-16    |
| LA16c-329F2.1 | LPAR1    | 0.222930907 | 2.39E-06    |
| LA16c-329F2.1 | STX11    | 0.289878317 | 6.03E-10    |
| LA16c-329F2.1 | ARHGEF28 | 0.496381861 | 1.09E-28    |
| LA16c-329F2.1 | OR2W3    | 0.549060538 | 6.23E-36    |
| LA16c-329F2.1 | ALDH1B1  | 0.503378309 | 1.41E-29    |
| LA16c-329F2.1 | CXCL12   | 0.316104398 | 1.21E-11    |
| LA16c-329F2.1 | OLFM2    | 0.557721292 | 3.00E-37    |
| LA16c-329F2.1 | TUB      | 0.483321301 | 4.44E-27    |
| LA16c-329F2.1 | HTRA3    | 0.297068498 | 2.15E-10    |
| LA16c-329F2.1 | CKB      | 0.609994029 | 4.31E-46    |
| LA16c-329F2.1 | RGS2     | 0.115113236 | 0.015820081 |
| LA16c-329F2.1 | SHANK2   | 0.632890752 | 1.65E-50    |
| LA16c-329F2.1 | CNTFR    | 0.618672431 | 1.01E-47    |
| LA16c-329F2.1 | CYTH3    | 0.619532049 | 6.90E-48    |
| LA16c-329F2.1 | PLAC9    | 0.551918143 | 2.31E-36    |
| LA16c-329F2.1 | WWOX     | 0.765477546 | 1.05E-85    |
| LA16c-329F2.1 | NPR3     | 0.436621936 | 7.35E-22    |

|               |          |             |             |
|---------------|----------|-------------|-------------|
| LA16c-329F2.1 | SDC2     | 0.376636772 | 3.04E-16    |
| LA16c-329F2.1 | KLF15    | 0.636099406 | 3.70E-51    |
| LA16c-329F2.1 | TMEM164  | 0.58614146  | 7.39E-42    |
| LA16c-329F2.1 | LONRF3   | 0.233653556 | 7.41E-07    |
| LA16c-329F2.1 | GBP1     | 0.163806272 | 0.000569711 |
| LA16c-329F2.1 | ARHGAP6  | 0.434037369 | 1.36E-21    |
| LA16c-329F2.1 | TMEM119  | 0.184968888 | 9.69E-05    |
| LA16c-329F2.1 | SH3RF1   | 0.432988337 | 1.74E-21    |
| LA16c-329F2.1 | CRELD2   | 0.68685306  | 1.52E-62    |
| LA16c-329F2.1 | PCP4     | 0.180519438 | 0.000143067 |
| LA16c-329F2.1 | GCSH     | 0.795276803 | 4.99E-97    |
| LA16c-329F2.1 | IMPA2    | 0.542069356 | 6.77E-35    |
| LA16c-329F2.1 | C1R      | 0.109828788 | 0.021359193 |
| LA16c-329F2.1 | SUCNR1   | 0.445079578 | 9.55E-23    |
| LA16c-329F2.1 | SFRP1    | 0.474952591 | 4.39E-26    |
| LA16c-329F2.1 | UGT8     | 0.541122447 | 9.31E-35    |
| LA16c-329F2.1 | TLE4     | 0.279612386 | 2.50E-09    |
| LA16c-329F2.1 | ANTXR1   | 0.33590991  | 4.86E-13    |
| LA16c-329F2.1 | GPX3     | 0.439212176 | 3.96E-22    |
| LA16c-329F2.1 | DPY19L2  | 0.64181887  | 2.47E-52    |
| LA16c-329F2.1 | FAM46C   | 0.526128922 | 1.27E-32    |
| LA16c-329F2.1 | IL33     | 0.303503828 | 8.31E-11    |
| LA16c-329F2.1 | PEG3     | 0.580068678 | 7.78E-41    |
| LA16c-329F2.1 | FAHD2A   | 0.780600144 | 3.14E-91    |
| LA16c-329F2.1 | PTGDS    | 0.225285413 | 1.86E-06    |
| LA16c-329F2.1 | CHCHD10  | 0.605982006 | 2.35E-45    |
| LA16c-329F2.1 | CD36     | 0.62027925  | 4.96E-48    |
| LA16c-329F2.1 | ANKRD37  | 0.590895719 | 1.13E-42    |
| LA16c-329F2.1 | TSPAN33  | 0.645991311 | 3.30E-53    |
| LA16c-329F2.1 | PRDM16   | 0.563639897 | 3.58E-38    |
| LA16c-329F2.1 | UST      | 0.684424373 | 6.01E-62    |
| LA16c-329F2.1 | NEXN     | 0.528808237 | 5.38E-33    |
| LA16c-329F2.1 | NUPR1L   | 0.372563183 | 6.67E-16    |
| LA16c-329F2.1 | SLC24A3  | 0.542649898 | 5.56E-35    |
| LA16c-329F2.1 | MARC1    | 0.66468595  | 2.69E-57    |
| LA16c-329F2.1 | MYH11    | 0.355618831 | 1.56E-14    |
| LA16c-329F2.1 | APOA1    | 0.713795022 | 1.35E-69    |
| LA16c-329F2.1 | TMEM178B | 0.403934295 | 1.17E-18    |
| LA16c-329F2.1 | CAPN6    | 0.263741356 | 2.02E-08    |
| LA16c-329F2.1 | PPM1L    | 0.610062536 | 4.19E-46    |
| LA16c-329F2.1 | FZD8     | 0.661486658 | 1.41E-56    |
| LA16c-329F2.1 | RCAN2    | 0.670128122 | 1.53E-58    |
| LA16c-329F2.1 | COPZ2    | 0.66070343  | 2.12E-56    |
| LA16c-329F2.1 | GAS1     | 0.278920785 | 2.75E-09    |
| LA16c-329F2.1 | DACT1    | 0.409413629 | 3.59E-19    |
| LA16c-329F2.1 | WBSCR17  | 0.623728886 | 1.07E-48    |
| LA16c-329F2.1 | NCS1     | 0.444358759 | 1.14E-22    |
| LA16c-329F2.1 | SPIRE2   | 0.546869428 | 1.32E-35    |
| LA16c-329F2.1 | C15orf52 | 0.414379651 | 1.21E-19    |
| LA16c-329F2.1 | SPAG5    | 0.504073012 | 1.14E-29    |
| LA16c-329F2.1 | ARL4D    | 0.562794969 | 4.86E-38    |



|               |          |             |             |
|---------------|----------|-------------|-------------|
| LA16c-329F2.1 | FAM189A2 | 0.551842118 | 2.37E-36    |
| LA16c-329F2.1 | MAP1LC3A | 0.748047533 | 7.81E-80    |
| LA16c-329F2.1 | KLF6     | 0.01161651  | 0.808232251 |
| LA16c-329F2.1 | ADD3     | 0.438217327 | 5.02E-22    |
| LA16c-329F2.1 | TSPAN7   | 0.611887562 | 1.92E-46    |
| LA16c-329F2.1 | KLF9     | 0.41948893  | 3.87E-20    |
| LA16c-329F2.1 | KCNQ1    | 0.756877783 | 9.56E-83    |
| LA16c-329F2.1 | MAN1A1   | 0.10398564  | 0.029373447 |
| LA16c-329F2.1 | MLF1     | 0.379967122 | 1.58E-16    |
| LA16c-329F2.1 | RARB     | 0.644130825 | 8.13E-53    |
| LA16c-329F2.1 | CDC42EP2 | 0.620281378 | 4.96E-48    |
| LA16c-329F2.1 | FAM3B    | 0.293571063 | 3.56E-10    |
| LA16c-329F2.1 | GADD45B  | 0.284260976 | 1.32E-09    |
| LA16c-329F2.1 | TMEM47   | 0.52362577  | 2.82E-32    |
| LA16c-329F2.1 | SDF2L1   | 0.657843839 | 9.13E-56    |
| LA16c-329F2.1 | CCDC85A  | 0.224022773 | 2.13E-06    |
| LA16c-329F2.1 | CRYBG3   | 0.038471925 | 0.421353173 |
| LA16c-329F2.1 | FBLN2    | 0.070801993 | 0.138580942 |
| LA16c-329F2.1 | PEBP4    | 0.492916056 | 2.97E-28    |
| LA16c-329F2.1 | CDADC1   | 0.782603602 | 5.40E-92    |
| LA16c-329F2.1 | FAM63A   | 0.606323835 | 2.04E-45    |
| LA16c-329F2.1 | GLUL     | 0.342014606 | 1.72E-13    |
| LA16c-329F2.1 | FREM2    | 0.447638898 | 5.09E-23    |
| LA16c-329F2.1 | ACKR3    | 0.531501594 | 2.25E-33    |
| LA16c-329F2.1 | DENND6A  | 0.590991885 | 1.09E-42    |
| LA16c-329F2.1 | CLDN8    | 0.125477887 | 0.008489191 |
| LA16c-329F2.1 | UTS2R    | 0.092551862 | 0.05264653  |
| LA16c-329F2.1 | SCNN1B   | 0.54551814  | 2.10E-35    |
| LA16c-329F2.1 | TTC30A   | 0.540381487 | 1.19E-34    |
| LA16c-329F2.1 | CORO2B   | 0.670289817 | 1.40E-58    |
| LA16c-329F2.1 | TC2N     | 0.219862531 | 3.31E-06    |
| LA16c-329F2.1 | ALDH2    | 0.746656104 | 2.19E-79    |
| LA16c-329F2.1 | GPR183   | 0.026851869 | 0.574725107 |
| LA16c-329F2.1 | C4orf47  | 0.677454325 | 2.90E-60    |
| LA16c-329F2.1 | SLC25A42 | 0.78242205  | 6.34E-92    |
| LA16c-329F2.1 | LGMN     | 0.559452705 | 1.62E-37    |
| LA16c-329F2.1 | ACSF2    | 0.715891925 | 3.53E-70    |
| LA16c-329F2.1 | KIAA1467 | 0.569624598 | 3.99E-39    |
| LA16c-329F2.1 | PRKG1    | 0.653370419 | 8.70E-55    |
| LA16c-329F2.1 | GNAI1    | 0.583453777 | 2.11E-41    |
| LA16c-329F2.1 | ABCC4    | 0.306488225 | 5.31E-11    |
| LA16c-329F2.1 | PRPS1    | 0.649136137 | 7.10E-54    |
| LA16c-329F2.1 | TSPAN5   | 0.345384813 | 9.60E-14    |
| LA16c-329F2.1 | CR2      | 0.192739354 | 4.80E-05    |
| LA16c-329F2.1 | CCDC170  | 0.490420989 | 6.05E-28    |
| LA16c-329F2.1 | RRAD     | 0.078636542 | 0.099872957 |
| LA16c-329F2.1 | SCGB2A1  | 0.561753597 | 7.07E-38    |
| LA16c-329F2.1 | SESN3    | 0.284491462 | 1.28E-09    |
| LA16c-329F2.1 | SGK223   | 0.252886752 | 7.83E-08    |
| LA16c-329F2.1 | NDRG2    | 0.800135881 | 4.70E-99    |
| LA16c-329F2.1 | C3orf52  | 0.23374036  | 7.34E-07    |

|               |          |              |             |
|---------------|----------|--------------|-------------|
| LA16c-329F2.1 | FLRT3    | -0.43494669  | 1.09E-21    |
| LA16c-329F2.1 | MST1R    | -0.649671717 | 5.45E-54    |
| LA16c-329F2.1 | SDC1     | -0.431014948 | 2.76E-21    |
| LA16c-329F2.1 | ST8SIA4  | -0.632608353 | 1.88E-50    |
| LA16c-329F2.1 | UBTD1    | -0.250830815 | 1.00E-07    |
| LA16c-329F2.1 | EPHA2    | -0.53197987  | 1.92E-33    |
| LA16c-329F2.1 | TMEM130  | -0.25728897  | 4.56E-08    |
| LA16c-329F2.1 | SPINK2   | -0.361378861 | 5.46E-15    |
| LA16c-329F2.1 | MMP16    | -0.699260174 | 1.08E-65    |
| LA16c-329F2.1 | SIGLEC15 | -0.521940454 | 4.81E-32    |
| LA16c-329F2.1 | RIN1     | -0.496703833 | 9.95E-29    |
| LA16c-329F2.1 | IL1RN    | -0.618484435 | 1.09E-47    |
| LA16c-329F2.1 | FCER1G   | -0.267554476 | 1.24E-08    |
| LA16c-329F2.1 | CD276    | -0.633570581 | 1.20E-50    |
| LA16c-329F2.1 | CTSB     | -0.425251656 | 1.05E-20    |
| LA16c-329F2.1 | FAM171A2 | -0.181599533 | 0.000130273 |
| LA16c-329F2.1 | ASPHD1   | -0.569784875 | 3.76E-39    |
| LA16c-329F2.1 | C15orf48 | -0.393840555 | 9.70E-18    |
| LA16c-329F2.1 | DYSF     | -0.168142252 | 0.000402943 |
| LA16c-329F2.1 | PDZRN4   | -0.096961694 | 0.042298883 |
| LA16c-329F2.1 | EFHD2    | -0.203154755 | 1.79E-05    |
| LA16c-329F2.1 | ASF1B    | -0.426661523 | 7.57E-21    |
| LA16c-329F2.1 | AQP1     | -0.093614891 | 0.049976636 |
| LA16c-329F2.1 | ARRDC2   | -0.432350351 | 2.02E-21    |
| LA16c-329F2.1 | PRSS1    | -0.369837118 | 1.12E-15    |
| LA16c-329F2.1 | MAPK13   | -0.607202095 | 1.41E-45    |
| LA16c-329F2.1 | CST5     | -0.630392998 | 5.22E-50    |
| LA16c-329F2.1 | AHR      | -0.672454403 | 4.39E-59    |
| LA16c-329F2.1 | BAX      | -0.415775902 | 8.87E-20    |
| LA16c-329F2.1 | C1orf115 | -0.261045117 | 2.85E-08    |
| LA16c-329F2.1 | PLK3     | -0.492283602 | 3.56E-28    |
| LA16c-329F2.1 | JAG2     | -0.251242428 | 9.56E-08    |
| LA16c-329F2.1 | RAD23B   | -0.568214873 | 6.71E-39    |
| LA16c-329F2.1 | CA12     | 0.102672365  | 0.031493701 |
| LA16c-329F2.1 | ADTRP    | -0.318576488 | 8.21E-12    |
| LA16c-329F2.1 | UCP2     | -0.304724757 | 6.93E-11    |
| LA16c-329F2.1 | IGFBP2   | -0.270141597 | 8.86E-09    |
| LA16c-329F2.1 | LOXL2    | -0.3094932   | 3.37E-11    |
| LA16c-329F2.1 | GPX1     | -0.319612329 | 6.97E-12    |
| LA16c-329F2.1 | P3H3     | -0.417496961 | 6.05E-20    |
| LA16c-329F2.1 | C2orf81  | -0.277944374 | 3.14E-09    |
| LA16c-329F2.1 | CDT1     | -0.444017497 | 1.24E-22    |
| LA16c-329F2.1 | SNX25    | -0.345509914 | 9.39E-14    |
| LA16c-329F2.1 | MTHFD1L  | -0.697726483 | 2.69E-65    |
| LA16c-329F2.1 | CDC42BPG | -0.693960716 | 2.49E-64    |
| LA16c-329F2.1 | MSN      | -0.658418708 | 6.81E-56    |
| LA16c-329F2.1 | SIGLEC6  | -0.504089453 | 1.14E-29    |
| LA16c-329F2.1 | F2R      | -0.354449521 | 1.93E-14    |
| LA16c-329F2.1 | TMEM184A | -0.612869789 | 1.26E-46    |
| LA16c-329F2.1 | CKS2     | -0.339153739 | 2.81E-13    |
| LA16c-329F2.1 | TAX1BP3  | -0.523367909 | 3.06E-32    |

|               |          |              |             |
|---------------|----------|--------------|-------------|
| LA16c-329F2.1 | PMEPA1   | -0.498990966 | 5.11E-29    |
| LA16c-329F2.1 | CXCL16   | -0.674231204 | 1.68E-59    |
| LA16c-329F2.1 | FAXC     | -0.720320525 | 1.99E-71    |
| LA16c-329F2.1 | VTCN1    | -0.638143229 | 1.42E-51    |
| LA16c-329F2.1 | SH2D4A   | -0.576935199 | 2.57E-40    |
| LA16c-329F2.1 | RNF24    | -0.547362598 | 1.12E-35    |
| LA16c-329F2.1 | LY6G6C   | -0.570296544 | 3.11E-39    |
| LA16c-329F2.1 | NID1     | -0.504623485 | 9.71E-30    |
| LA16c-329F2.1 | STAC     | -0.726938106 | 2.44E-73    |
| LA16c-329F2.1 | RAB34    | -0.432262127 | 2.06E-21    |
| LA16c-329F2.1 | HES4     | -0.252450601 | 8.26E-08    |
| LA16c-329F2.1 | EPHA10   | -0.624642037 | 7.10E-49    |
| LA16c-329F2.1 | ENTPD2   | -0.412340876 | 1.89E-19    |
| LA16c-329F2.1 | DDB2     | -0.517345195 | 2.03E-31    |
| LA16c-329F2.1 | NKAIN4   | -0.339363234 | 2.71E-13    |
| LA16c-329F2.1 | TRIM29   | -0.568600388 | 5.82E-39    |
| LA16c-329F2.1 | ADCY8    | -0.567557078 | 8.55E-39    |
| LA16c-329F2.1 | SFTA2    | -0.422764531 | 1.85E-20    |
| LA16c-329F2.1 | NRIP1    | -0.632014621 | 2.47E-50    |
| LA16c-329F2.1 | VWA1     | -0.022370364 | 0.640189886 |
| LA16c-329F2.1 | APLNR    | -0.123858951 | 0.009383841 |
| LA16c-329F2.1 | REN      | -0.405987259 | 7.52E-19    |
| LA16c-329F2.1 | EDIL3    | -0.240193552 | 3.52E-07    |
| LA16c-329F2.1 | AGRN     | -0.536298971 | 4.65E-34    |
| LA16c-329F2.1 | TREM1    | -0.502881434 | 1.63E-29    |
| LA16c-329F2.1 | SRL      | -0.440567862 | 2.86E-22    |
| LA16c-329F2.1 | RASGRF1  | -0.544372091 | 3.10E-35    |
| LA16c-329F2.1 | RMI2     | -0.416848905 | 6.99E-20    |
| LA16c-329F2.1 | SAMD1    | -0.395194112 | 7.33E-18    |
| LA16c-329F2.1 | MGAT4B   | -0.653853377 | 6.83E-55    |
| LA16c-329F2.1 | NXN      | -0.657651649 | 1.01E-55    |
| LA16c-329F2.1 | SH3BGRL3 | -0.416942517 | 6.84E-20    |
| LA16c-329F2.1 | CA11     | -0.142232044 | 0.002819193 |
| LA16c-329F2.1 | PLD3     | -0.22980564  | 1.14E-06    |
| LA16c-329F2.1 | LURAP1L  | -0.574473037 | 6.53E-40    |
| LA16c-329F2.1 | CARNS1   | -0.244717466 | 2.08E-07    |
| LA16c-329F2.1 | PDLIM7   | -0.35918917  | 8.16E-15    |
| LA16c-329F2.1 | BCL2L1   | -0.668414864 | 3.79E-58    |
| LA16c-329F2.1 | GGT6     | -0.276545712 | 3.79E-09    |
| LA16c-329F2.1 | DPYSL3   | -0.47233767  | 8.88E-26    |
| LA16c-329F2.1 | FYN      | -0.553389993 | 1.38E-36    |
| LA16c-329F2.1 | TK1      | -0.349809867 | 4.41E-14    |
| LA16c-329F2.1 | AK1      | -0.1290061   | 0.006797817 |
| LA16c-329F2.1 | HIGD1B   | 0.069245182  | 0.147491182 |
| LA16c-329F2.1 | TMEM59L  | -0.447826266 | 4.86E-23    |
| LA16c-329F2.1 | MEGF9    | -0.565236848 | 2.00E-38    |
| LA16c-329F2.1 | ZFP36L1  | -0.594619244 | 2.54E-43    |
| LA16c-329F2.1 | ADRA1B   | -0.335756584 | 4.99E-13    |
| LA16c-329F2.1 | EPHA4    | -0.660227139 | 2.70E-56    |
| LA16c-329F2.1 | TCERG1L  | -0.233318393 | 7.69E-07    |
| LA16c-329F2.1 | NGFR     | -0.168444792 | 0.000393198 |

|               |          |              |             |
|---------------|----------|--------------|-------------|
| LA16c-329F2.1 | EBI3     | -0.516280986 | 2.82E-31    |
| LA16c-329F2.1 | S100A10  | -0.55544352  | 6.71E-37    |
| LA16c-329F2.1 | S100B    | -0.371388492 | 8.35E-16    |
| LA16c-329F2.1 | CD44     | -0.224545871 | 2.01E-06    |
| LA16c-329F2.1 | BHLHE41  | -0.474198581 | 5.38E-26    |
| LA16c-329F2.1 | FBX02    | -0.25736301  | 4.52E-08    |
| LA16c-329F2.1 | SLC30A2  | -0.517845456 | 1.73E-31    |
| LA16c-329F2.1 | FRMD5    | -0.605698331 | 2.65E-45    |
| LA16c-329F2.1 | SAMD11   | -0.301982182 | 1.04E-10    |
| LA16c-329F2.1 | SIPA1L2  | -0.535543543 | 5.97E-34    |
| LA16c-329F2.1 | S100A16  | -0.57045676  | 2.93E-39    |
| LA16c-329F2.1 | PPL      | -0.756681337 | 1.11E-82    |
| LA16c-329F2.1 | ARHGDIB  | -0.170527395 | 0.000331846 |
| LA16c-329F2.1 | CDC42EP3 | -0.675720784 | 7.49E-60    |
| LA16c-329F2.1 | RUNX2    | -0.450166163 | 2.72E-23    |
| LA16c-329F2.1 | LAMC2    | -0.705919172 | 1.88E-67    |
| LA16c-329F2.1 | BRINP1   | -0.468685774 | 2.35E-25    |
| LA16c-329F2.1 | GPRC5B   | -0.528997023 | 5.06E-33    |
| LA16c-329F2.1 | AQP5     | -0.131463014 | 0.005805229 |
| LA16c-329F2.1 | PLAG1    | -0.431556343 | 2.43E-21    |
| LA16c-329F2.1 | PTPRU    | -0.699392509 | 9.95E-66    |
| LA16c-329F2.1 | ANGPTL4  | -0.441909788 | 2.07E-22    |
| LA16c-329F2.1 | PALM3    | -0.319452194 | 7.15E-12    |
| LA16c-329F2.1 | ACP5     | -0.366245598 | 2.21E-15    |
| LA16c-329F2.1 | DLG4     | -0.275592563 | 4.31E-09    |
| LA16c-329F2.1 | ETNK2    | -0.416265384 | 7.96E-20    |
| LA16c-329F2.1 | CD109    | -0.639857822 | 6.29E-52    |
| LA16c-329F2.1 | SNX22    | -0.299636895 | 1.47E-10    |
| LA16c-329F2.1 | TMEM98   | -0.543413127 | 4.30E-35    |
| LA16c-329F2.1 | CTHRC1   | -0.429270202 | 4.14E-21    |
| LA16c-329F2.1 | S100A2   | -0.508897765 | 2.69E-30    |
| LA16c-329F2.1 | C11orf80 | -0.582354109 | 3.23E-41    |
| LA16c-329F2.1 | SREBF1   | -0.514863744 | 4.36E-31    |
| LA16c-329F2.1 | PRSS22   | -0.625074642 | 5.84E-49    |
| LA16c-329F2.1 | CMTM3    | -0.480789497 | 8.95E-27    |
| LA16c-329F2.1 | RDH5     | -0.41770064  | 5.78E-20    |
| LA16c-329F2.1 | MYH10    | -0.620034722 | 5.53E-48    |
| LA16c-329F2.1 | EVPL     | -0.58934827  | 2.09E-42    |
| LA16c-329F2.1 | SCD      | -0.570455484 | 2.93E-39    |
| LA16c-329F2.1 | CD151    | -0.423126075 | 1.70E-20    |
| LA16c-329F2.1 | S100A4   | -0.458614586 | 3.23E-24    |
| LA16c-329F2.1 | BNIP1    | -0.29822873  | 1.81E-10    |
| LA16c-329F2.1 | MAP3K6   | -0.55047622  | 3.82E-36    |
| LA16c-329F2.1 | MANEAL   | -0.449802491 | 2.98E-23    |
| LA16c-329F2.1 | CD207    | -0.384715271 | 6.18E-17    |
| LA16c-329F2.1 | CD1A     | -0.41952557  | 3.84E-20    |
| LA16c-329F2.1 | C3       | -0.455592733 | 6.96E-24    |
| LA16c-329F2.1 | NT5E     | -0.576403733 | 3.15E-40    |
| LA16c-329F2.1 | CACNG4   | -0.632581144 | 1.90E-50    |
| LA16c-329F2.1 | FHOD1    | -0.431195082 | 2.64E-21    |
| LA16c-329F2.1 | LEMD1    | -0.550491255 | 3.80E-36    |

|               |          |              |             |
|---------------|----------|--------------|-------------|
| LA16c-329F2.1 | ATP11A   | -0.406690911 | 6.47E-19    |
| LA16c-329F2.1 | PPAP2C   | -0.370355488 | 1.02E-15    |
| LA16c-329F2.1 | DRAM1    | -0.695006461 | 1.35E-64    |
| LA16c-329F2.1 | CDA      | -0.174561544 | 0.000237571 |
| LA16c-329F2.1 | CCND2    | -0.345438286 | 9.51E-14    |
| LA16c-329F2.1 | LCN6     | -0.163484803 | 0.000584333 |
| LA16c-329F2.1 | CDH4     | -0.508129855 | 3.40E-30    |
| LA16c-329F2.1 | MMP11    | -0.508734793 | 2.83E-30    |
| LA16c-329F2.1 | B3GAT1   | -0.490282839 | 6.29E-28    |
| LA16c-329F2.1 | SPP1     | -0.326751306 | 2.21E-12    |
| LA16c-329F2.1 | HLA-DQB1 | -0.334480186 | 6.18E-13    |
| LA16c-329F2.1 | SDC3     | -0.572644749 | 1.30E-39    |
| LA16c-329F2.1 | CX3CL1   | -0.480817156 | 8.88E-27    |
| LA16c-329F2.1 | SDK1     | -0.469930117 | 1.69E-25    |
| LA16c-329F2.1 | DOCK9    | -0.651167963 | 2.60E-54    |
| LA16c-329F2.1 | CSF2     | -0.545607466 | 2.04E-35    |
| LA16c-329F2.1 | GRHL3    | -0.698171286 | 2.07E-65    |
| LA16c-329F2.1 | TMEM92   | -0.620803858 | 3.93E-48    |
| LA16c-329F2.1 | BASP1    | -0.563240056 | 4.13E-38    |
| LA16c-329F2.1 | HRH1     | -0.692218356 | 6.90E-64    |
| LA16c-329F2.1 | ESM1     | -0.104065211 | 0.029249011 |
| LA16c-329F2.1 | B4GALNT3 | -0.573910934 | 8.07E-40    |
| LA16c-329F2.1 | LMO3     | -0.325574053 | 2.68E-12    |
| LA16c-329F2.1 | C9orf16  | -0.447487841 | 5.28E-23    |
| LA16c-329F2.1 | SEMA3F   | -0.279315378 | 2.61E-09    |
| LA16c-329F2.1 | PLA2G12B | -0.213226816 | 6.58E-06    |
| LA16c-329F2.1 | KLK6     | -0.489181678 | 8.59E-28    |
| LA16c-329F2.1 | ST3GAL5  | -0.382985855 | 8.73E-17    |
| LA16c-329F2.1 | FAM132B  | -0.217438666 | 4.27E-06    |
| LA16c-329F2.1 | CDKN1A   | -0.441690224 | 2.18E-22    |
| LA16c-329F2.1 | E2F1     | -0.448321989 | 4.30E-23    |
| LA16c-329F2.1 | B3GNT8   | -0.381500955 | 1.17E-16    |
| LA16c-329F2.1 | MTMR11   | -0.640555238 | 4.51E-52    |
| LA16c-329F2.1 | MYO1G    | -0.552655415 | 1.79E-36    |
| LA16c-329F2.1 | TMSB10   | -0.428591367 | 4.85E-21    |
| LA16c-329F2.1 | UNC5CL   | -0.634015809 | 9.79E-51    |
| LA16c-329F2.1 | ABR      | -0.636519103 | 3.04E-51    |
| LA16c-329F2.1 | PLP2     | -0.52123013  | 6.01E-32    |
| LA16c-329F2.1 | SRCIN1   | -0.447755347 | 4.95E-23    |
| LA16c-329F2.1 | PDE9A    | -0.595841885 | 1.55E-43    |
| LA16c-329F2.1 | TREM2    | -0.261576158 | 2.66E-08    |
| LA16c-329F2.1 | KDELR3   | -0.45867742  | 3.17E-24    |
| LA16c-329F2.1 | PC       | -0.461540273 | 1.52E-24    |
| LA16c-329F2.1 | C2CD4A   | -0.619743671 | 6.29E-48    |
| LA16c-329F2.1 | PELI1    | -0.644588252 | 6.52E-53    |
| LA16c-329F2.1 | SSX1     | -0.372260652 | 7.07E-16    |
| LA16c-329F2.1 | MROH6    | -0.556972814 | 3.91E-37    |
| LA16c-329F2.1 | ESPN     | -0.41230414  | 1.91E-19    |
| LA16c-329F2.1 | BMP1     | -0.416384811 | 7.75E-20    |
| LA16c-329F2.1 | TM4SF4   | -0.534848776 | 7.51E-34    |
| LA16c-329F2.1 | CORO2A   | -0.617522634 | 1.67E-47    |

|               |          |              |             |
|---------------|----------|--------------|-------------|
| LA16c-329F2.1 | CD164L2  | -0.376632034 | 3.04E-16    |
| LA16c-329F2.1 | CTSS     | -0.504929145 | 8.86E-30    |
| LA16c-329F2.1 | CLU      | -0.445218295 | 9.23E-23    |
| LA16c-329F2.1 | TMSB4X   | -0.484158285 | 3.52E-27    |
| LA16c-329F2.1 | WNT10A   | -0.523395302 | 3.04E-32    |
| LA16c-329F2.1 | NAPSA    | -0.448602544 | 4.01E-23    |
| LA16c-329F2.1 | PLEKHA4  | -0.451465113 | 1.97E-23    |
| LA16c-329F2.1 | SFTPA1   | -0.129968015 | 0.006392399 |
| LA16c-329F2.1 | C1orf116 | -0.602451665 | 1.03E-44    |
| LA16c-329F2.1 | TM4SF1   | -0.538696313 | 2.10E-34    |
| LA16c-329F2.1 | SEL1L3   | -0.620301802 | 4.91E-48    |
| LA16c-329F2.1 | VASN     | -0.545122129 | 2.40E-35    |
| LA16c-329F2.1 | NPTXR    | -0.640186602 | 5.38E-52    |
| LA16c-329F2.1 | PDE4C    | -0.612680293 | 1.36E-46    |
| LA16c-329F2.1 | CDC42EP1 | -0.573856752 | 8.23E-40    |
| LA16c-329F2.1 | ENDOD1   | -0.687173755 | 1.26E-62    |
| LA16c-329F2.1 | RYR1     | -0.542723937 | 5.43E-35    |
| LA16c-329F2.1 | IL1RAP   | -0.701708577 | 2.46E-66    |
| LA16c-329F2.1 | SLC35F2  | -0.679211435 | 1.10E-60    |
| LA16c-329F2.1 | ISYNA1   | -0.284419692 | 1.29E-09    |
| LA16c-329F2.1 | HLA-G    | -0.552945048 | 1.61E-36    |
| LA16c-329F2.1 | CDKN2B   | -0.645304675 | 4.61E-53    |
| LA16c-329F2.1 | ALDH1A3  | -0.636198976 | 3.53E-51    |
| LA16c-329F2.1 | CLIP3    | -0.508790819 | 2.78E-30    |
| LA16c-329F2.1 | ULBP2    | -0.558446366 | 2.31E-37    |
| LA16c-329F2.1 | ETHE1    | -0.617291155 | 1.85E-47    |
| LA16c-329F2.1 | XPR1     | -0.695416088 | 1.06E-64    |
| LA16c-329F2.1 | SPTBN2   | -0.722438446 | 4.93E-72    |
| LA16c-329F2.1 | IVL      | -0.59563211  | 1.68E-43    |
| LA16c-329F2.1 | MARCO    | -0.463149989 | 1.00E-24    |
| LA16c-329F2.1 | PLXND1   | -0.342834003 | 1.49E-13    |
| LA16c-329F2.1 | EMILIN2  | -0.498367022 | 6.14E-29    |
| LA16c-329F2.1 | PLAUR    | -0.583840994 | 1.81E-41    |
| LA16c-329F2.1 | CDC42EP5 | -0.509740139 | 2.09E-30    |
| LA16c-329F2.1 | TRPC5    | -0.294497879 | 3.12E-10    |
| LA16c-329F2.1 | TMEM100  | -0.415374501 | 9.70E-20    |
| LA16c-329F2.1 | QSOX1    | -0.684692588 | 5.16E-62    |
| LA16c-329F2.1 | ARHGAP23 | -0.622243986 | 2.07E-48    |
| LA16c-329F2.1 | MDFI     | -0.410198984 | 3.02E-19    |
| LA16c-329F2.1 | FSTL3    | -0.628820719 | 1.07E-49    |
| LA16c-329F2.1 | INF2     | -0.447347847 | 5.47E-23    |
| LA16c-329F2.1 | TGFBR1   | -0.602648678 | 9.47E-45    |
| LA16c-329F2.1 | TGFBI    | -0.33176683  | 9.71E-13    |
| LA16c-329F2.1 | ERBB3    | -0.703952592 | 6.29E-67    |
| LA16c-329F2.1 | CCL18    | -0.427815373 | 5.80E-21    |
| LA16c-329F2.1 | CCL17    | -0.436394869 | 7.76E-22    |
| LA16c-329F2.1 | C16orf45 | -0.390955433 | 1.75E-17    |
| LA16c-329F2.1 | PRDM1    | -0.376926688 | 2.87E-16    |
| LA16c-329F2.1 | TRIM47   | -0.613794996 | 8.44E-47    |
| LA16c-329F2.1 | CNFN     | -0.390527367 | 1.91E-17    |
| LA16c-329F2.1 | ARMCX3   | -0.365315    | 2.63E-15    |

|               |           |              |            |
|---------------|-----------|--------------|------------|
| LA16c-329F2.1 | RAMP1     | -0.284965058 | 1.20E-09   |
| LA16c-329F2.1 | GABRD     | -0.023558964 | 0.62252418 |
| LA16c-329F2.1 | COL13A1   | -0.202123311 | 1.98E-05   |
| LA16c-329F2.1 | S100A5    | -0.384336859 | 6.67E-17   |
| LA16c-329F2.1 | MISP      | -0.629454875 | 8.02E-50   |
| LA16c-329F2.1 | HES6      | -0.272113425 | 6.84E-09   |
| LA16c-329F2.1 | PSD3      | -0.620853267 | 3.85E-48   |
| LA16c-329F2.1 | DOK7      | -0.617485614 | 1.70E-47   |
| LA16c-329F2.1 | ZMAT3     | -0.695013836 | 1.34E-64   |
| LA16c-329F2.1 | MFAP2     | -0.417051732 | 6.68E-20   |
| LA16c-329F2.1 | TMEM79    | -0.545407932 | 2.18E-35   |
| LA16c-329F2.1 | SLC1A5    | -0.457797317 | 3.97E-24   |
| LA16c-329F2.1 | BBC3      | -0.512810784 | 8.20E-31   |
| LA16c-329F2.1 | HLA-DQB2  | -0.359476108 | 7.74E-15   |
| LA16c-329F2.1 | C1QL1     | -0.394135435 | 9.13E-18   |
| LA16c-329F2.1 | TMEM215   | -0.223152643 | 2.34E-06   |
| LA16c-329F2.1 | PNP       | -0.476135801 | 3.19E-26   |
| LA16c-329F2.1 | ARNTL     | -0.561954297 | 6.58E-38   |
| LA16c-329F2.1 | CLDN2     | -0.244371816 | 2.17E-07   |
| LA16c-329F2.1 | MVP       | -0.593811903 | 3.51E-43   |
| LA16c-329F2.1 | LGALS1    | -0.418465713 | 4.87E-20   |
| LA16c-329F2.1 | BIRC7     | -0.461815198 | 1.42E-24   |
| LA16c-329F2.1 | COL8A1    | -0.65801135  | 8.38E-56   |
| LA16c-329F2.1 | PERP      | -0.750640468 | 1.12E-80   |
| LA16c-329F2.1 | GJA4      | -0.257684272 | 4.34E-08   |
| LA16c-329F2.1 | IGFL2     | -0.498749239 | 5.49E-29   |
| LA16c-329F2.1 | DAPK2     | -0.529558275 | 4.22E-33   |
| LA16c-329F2.1 | MAMLD1    | -0.62277602  | 1.64E-48   |
| LA16c-329F2.1 | ETV5      | -0.34164753  | 1.83E-13   |
| LA16c-329F2.1 | RUNX1     | -0.781371174 | 1.60E-91   |
| LA16c-329F2.1 | LONRF2    | -0.372311147 | 7.00E-16   |
| LA16c-329F2.1 | SPOCK1    | -0.248397446 | 1.35E-07   |
| LA16c-329F2.1 | XKRX      | -0.503955145 | 1.18E-29   |
| LA16c-329F2.1 | TGFB1     | -0.311746718 | 2.38E-11   |
| LA16c-329F2.1 | ERP27     | -0.314013285 | 1.68E-11   |
| LA16c-329F2.1 | TNFRSF10C | -0.546132298 | 1.70E-35   |
| LA16c-329F2.1 | PALM      | -0.556691692 | 4.32E-37   |
| LA16c-329F2.1 | TSC22D1   | -0.328168407 | 1.76E-12   |
| LA16c-329F2.1 | TGM2      | -0.655855416 | 2.50E-55   |
| LA16c-329F2.1 | UBE2QL1   | -0.224282337 | 2.07E-06   |
| LA16c-329F2.1 | ECE1      | -0.632015897 | 2.47E-50   |
| LA16c-329F2.1 | COL8A2    | -0.642357003 | 1.91E-52   |
| LA16c-329F2.1 | HIST3H2A  | -0.482028308 | 6.36E-27   |
| LA16c-329F2.1 | TNFRSF21  | -0.681619532 | 2.90E-61   |
| LA16c-329F2.1 | SOX4      | -0.697770027 | 2.62E-65   |
| LA16c-329F2.1 | ELF3      | -0.730358523 | 2.38E-74   |
| LA16c-329F2.1 | TPD52L1   | -0.471485793 | 1.11E-25   |
| LA16c-329F2.1 | INHBB     | -0.456521203 | 5.50E-24   |
| LA16c-329F2.1 | HPN       | -0.389380041 | 2.42E-17   |
| LA16c-329F2.1 | MMP7      | -0.537365382 | 3.27E-34   |
| LA16c-329F2.1 | RAB27A    | -0.616767773 | 2.32E-47   |

|               |            |              |             |
|---------------|------------|--------------|-------------|
| LA16c-329F2.1 | IGF2BP2    | -0.578655974 | 1.34E-40    |
| LA16c-329F2.1 | ITGB4      | -0.65602321  | 2.30E-55    |
| LA16c-329F2.1 | PPP1R1B    | -0.463347427 | 9.51E-25    |
| LA16c-329F2.1 | NPDC1      | -0.275125491 | 4.58E-09    |
| LA16c-329F2.1 | CCL13      | -0.531470507 | 2.27E-33    |
| LA16c-329F2.1 | SPINT1     | -0.670248826 | 1.43E-58    |
| LA16c-329F2.1 | HEY2       | -0.308822449 | 3.73E-11    |
| LA16c-329F2.1 | CST2       | -0.610709057 | 3.18E-46    |
| LA16c-329F2.1 | ADM        | -0.335851899 | 4.91E-13    |
| LA16c-329F2.1 | VSTM2L     | -0.535275045 | 6.52E-34    |
| LA16c-329F2.1 | FAM84A     | -0.619088522 | 8.39E-48    |
| LA16c-329F2.1 | P4HA2      | -0.459157682 | 2.81E-24    |
| LA16c-329F2.1 | LPL        | -0.447451956 | 5.33E-23    |
| LA16c-329F2.1 | TMEM173    | -0.510982496 | 1.43E-30    |
| LA16c-329F2.1 | DHRS3      | -0.472023358 | 9.66E-26    |
| LA16c-329F2.1 | SCN1B      | -0.504189603 | 1.10E-29    |
| LA16c-329F2.1 | GLT1D1     | -0.341154361 | 1.99E-13    |
| LA16c-329F2.1 | PHYHIP     | -0.467336614 | 3.35E-25    |
| LA16c-329F2.1 | BHLHE40    | -0.658387078 | 6.92E-56    |
| LA16c-329F2.1 | BID        | -0.554898295 | 8.13E-37    |
| LA16c-329F2.1 | POSTN      | -0.424856921 | 1.15E-20    |
| LA16c-329F2.1 | ITGA3      | -0.771038437 | 1.10E-87    |
| LA16c-329F2.1 | RSPO4      | -0.569282202 | 4.53E-39    |
| LA16c-329F2.1 | ADAMTS9    | -0.206799843 | 1.25E-05    |
| LA16c-329F2.1 | ABTB2      | -0.713187647 | 1.99E-69    |
| LA16c-329F2.1 | KCNQ3      | -0.81605589  | 4.20E-106   |
| LA16c-329F2.1 | ANXA1      | -0.499440876 | 4.48E-29    |
| LA16c-329F2.1 | S100A11    | -0.571056308 | 2.34E-39    |
| LA16c-329F2.1 | CEACAM6    | -0.661264659 | 1.59E-56    |
| LA16c-329F2.1 | IER5L      | -0.5071855   | 4.51E-30    |
| LA16c-329F2.1 | KRT80      | -0.714907288 | 6.64E-70    |
| LA16c-329F2.1 | CDH6       | -0.660806262 | 2.01E-56    |
| LA16c-329F2.1 | UNC5B      | -0.515631795 | 3.44E-31    |
| LA16c-329F2.1 | PLEKHN1    | -0.649226772 | 6.79E-54    |
| LA16c-329F2.1 | SYTL1      | -0.424205177 | 1.33E-20    |
| LA16c-329F2.1 | TMEM163    | -0.594450599 | 2.71E-43    |
| LA16c-329F2.1 | C4orf48    | -0.159676525 | 0.000786156 |
| LA16c-329F2.1 | B3GNT7     | -0.421257363 | 2.60E-20    |
| LA16c-329F2.1 | BAIAP3     | -0.469044198 | 2.13E-25    |
| LA16c-329F2.1 | PHLDA2     | -0.462290311 | 1.25E-24    |
| LA16c-329F2.1 | GAP43      | -0.538292743 | 2.40E-34    |
| LA16c-329F2.1 | S100A1     | -0.457784693 | 3.99E-24    |
| LA16c-329F2.1 | PTPRE      | -0.753214965 | 1.60E-81    |
| LA16c-329F2.1 | CCND1      | -0.639704353 | 6.77E-52    |
| LA16c-329F2.1 | ST6GALNAC5 | -0.737986796 | 1.17E-76    |
| LA16c-329F2.1 | KRT17      | -0.32997854  | 1.31E-12    |
| LA16c-329F2.1 | HPCAL4     | -0.357301736 | 1.15E-14    |
| LA16c-329F2.1 | GABBR2     | -0.260768108 | 2.95E-08    |
| LA16c-329F2.1 | DIRAS3     | -0.302169408 | 1.01E-10    |
| LA16c-329F2.1 | SERINC2    | -0.479842305 | 1.16E-26    |
| LA16c-329F2.1 | PTCHD4     | -0.529896558 | 3.78E-33    |



|               |         |              |             |
|---------------|---------|--------------|-------------|
| LA16c-329F2.1 | EPS8    | -0.53507477  | 6.97E-34    |
| LA16c-329F2.1 | LY6E    | -0.455933569 | 6.39E-24    |
| LA16c-329F2.1 | UPP1    | -0.669409147 | 2.24E-58    |
| LA16c-329F2.1 | AHNAK2  | -0.77630473  | 1.29E-89    |
| LA16c-329F2.1 | PLXNC1  | -0.440137668 | 3.17E-22    |
| LA16c-329F2.1 | TNC     | -0.596436043 | 1.21E-43    |
| LA16c-329F2.1 | DUSP4   | -0.514367453 | 5.08E-31    |
| LA16c-329F2.1 | NRCAM   | -0.576304304 | 3.27E-40    |
| LA16c-329F2.1 | NRP2    | -0.481731442 | 6.90E-27    |
| LA16c-329F2.1 | CTSC    | -0.577651195 | 1.96E-40    |
| LA16c-329F2.1 | AMIGO2  | -0.468322953 | 2.58E-25    |
| LA16c-329F2.1 | NAB2    | -0.433121522 | 1.68E-21    |
| LA16c-329F2.1 | TBC1D2  | -0.764009668 | 3.43E-85    |
| LA16c-329F2.1 | PHLDA3  | -0.505916336 | 6.60E-30    |
| LA16c-329F2.1 | PTP4A3  | -0.417941339 | 5.47E-20    |
| LA16c-329F2.1 | CRABP2  | -0.284251614 | 1.33E-09    |
| LA16c-329F2.1 | GOS2    | -0.289948385 | 5.97E-10    |
| LA16c-329F2.1 | S100A6  | -0.606671196 | 1.76E-45    |
| LA16c-329F2.1 | FOXQ1   | -0.637288715 | 2.12E-51    |
| LA16c-329F2.1 | LRG1    | -0.550760605 | 3.46E-36    |
| LA16c-329F2.1 | LAMP5   | -0.419858134 | 3.56E-20    |
| LA16c-329F2.1 | ALDH3B1 | -0.732683386 | 4.80E-75    |
| LA16c-329F2.1 | CDH2    | -0.056035125 | 0.241341789 |
| LA16c-329F2.1 | SCG5    | -0.193287529 | 4.57E-05    |
| LA16c-329F2.1 | ZCCHC16 | -0.238164065 | 4.45E-07    |
| LA16c-329F2.1 | GRB7    | -0.631746689 | 2.80E-50    |
| LA16c-329F2.1 | TIAM1   | -0.540253975 | 1.25E-34    |
| LA16c-329F2.1 | FXYD5   | -0.313610749 | 1.79E-11    |
| LA16c-329F2.1 | CLDN9   | -0.47228363  | 9.01E-26    |
| LA16c-329F2.1 | FAM43A  | -0.503732744 | 1.26E-29    |
| LA16c-329F2.1 | CHST2   | -0.540330709 | 1.21E-34    |
| LA16c-329F2.1 | HMGA2   | -0.467232363 | 3.44E-25    |
| LA16c-329F2.1 | GALNT7  | -0.571019714 | 2.38E-39    |
| LA16c-329F2.1 | CBLN1   | -0.476417491 | 2.96E-26    |
| LA16c-329F2.1 | STRA6   | -0.602590383 | 9.71E-45    |
| LA16c-329F2.1 | MUC21   | -0.65038147  | 3.84E-54    |
| LA16c-329F2.1 | PRR36   | -0.510704919 | 1.56E-30    |
| LA16c-329F2.1 | NFE2L3  | -0.602366988 | 1.06E-44    |
| LA16c-329F2.1 | NR1D1   | -0.45531232  | 7.47E-24    |
| LA16c-329F2.1 | MUC1    | -0.689961434 | 2.55E-63    |
| LA16c-329F2.1 | NAT8L   | -0.191968296 | 5.16E-05    |
| LA16c-329F2.1 | APOC1   | -0.15393621  | 0.001214593 |
| LA16c-329F2.1 | EVA1A   | -0.690417726 | 1.96E-63    |
| LA16c-329F2.1 | ENTPD1  | -0.400446647 | 2.45E-18    |
| LA16c-329F2.1 | COL1A1  | -0.480418875 | 9.91E-27    |
| LA16c-329F2.1 | FNDC4   | -0.497859952 | 7.11E-29    |
| LA16c-329F2.1 | FRMD3   | -0.219316314 | 3.51E-06    |
| LA16c-329F2.1 | SHROOM4 | -0.604290024 | 4.78E-45    |
| LA16c-329F2.1 | NELL2   | -0.319446379 | 7.16E-12    |
| LA16c-329F2.1 | EPHB3   | -0.714376956 | 9.32E-70    |
| LA16c-329F2.1 | TMC6    | -0.591661643 | 8.31E-43    |

|               |           |              |             |
|---------------|-----------|--------------|-------------|
| LA16c-329F2.1 | NOD1      | -0.522821975 | 3.64E-32    |
| LA16c-329F2.1 | GGCT      | -0.488923891 | 9.24E-28    |
| LA16c-329F2.1 | ICAM1     | -0.705656631 | 2.21E-67    |
| LA16c-329F2.1 | PRSS23    | -0.574754443 | 5.87E-40    |
| LA16c-329F2.1 | CFI       | -0.578003804 | 1.71E-40    |
| LA16c-329F2.1 | CD55      | -0.773851788 | 1.04E-88    |
| LA16c-329F2.1 | RASD2     | -0.541796176 | 7.42E-35    |
| LA16c-329F2.1 | KLK11     | -0.420821273 | 2.87E-20    |
| LA16c-329F2.1 | ICAM5     | -0.528816038 | 5.36E-33    |
| LA16c-329F2.1 | ADORA1    | -0.446339239 | 7.01E-23    |
| LA16c-329F2.1 | ITGA2     | -0.738808081 | 6.50E-77    |
| LA16c-329F2.1 | ABCC3     | -0.437206875 | 6.40E-22    |
| LA16c-329F2.1 | MFGE8     | -0.563663016 | 3.55E-38    |
| LA16c-329F2.1 | STK32A    | -0.451772901 | 1.82E-23    |
| LA16c-329F2.1 | CYSLTR2   | -0.456027182 | 6.24E-24    |
| LA16c-329F2.1 | LAD1      | -0.623840228 | 1.02E-48    |
| LA16c-329F2.1 | MGAT3     | -0.701732122 | 2.43E-66    |
| LA16c-329F2.1 | IGFBP6    | -0.375137263 | 4.06E-16    |
| LA16c-329F2.1 | CYP2S1    | -0.731250824 | 1.29E-74    |
| LA16c-329F2.1 | KCNJ2     | -0.466747561 | 3.91E-25    |
| LA16c-329F2.1 | FAM20A    | -0.536544351 | 4.29E-34    |
| LA16c-329F2.1 | TGFA      | -0.501166332 | 2.70E-29    |
| LA16c-329F2.1 | MXRA8     | -0.552232597 | 2.07E-36    |
| LA16c-329F2.1 | C8orf4    | -0.520456547 | 7.67E-32    |
| LA16c-329F2.1 | CLDN10    | -0.541182411 | 9.12E-35    |
| LA16c-329F2.1 | PDE5A     | -0.621242754 | 3.24E-48    |
| LA16c-329F2.1 | APOE      | -0.14703623  | 0.002009857 |
| LA16c-329F2.1 | SPOCK2    | -0.67838634  | 1.74E-60    |
| LA16c-329F2.1 | TENM1     | -0.219290357 | 3.52E-06    |
| LA16c-329F2.1 | SLIT1     | -0.226839813 | 1.57E-06    |
| LA16c-329F2.1 | CXCL14    | -0.344321881 | 1.15E-13    |
| LA16c-329F2.1 | ECM1      | -0.201122788 | 2.18E-05    |
| LA16c-329F2.1 | DUSP5     | -0.685165049 | 3.95E-62    |
| LA16c-329F2.1 | SEZ6L2    | -0.550032552 | 4.45E-36    |
| LA16c-329F2.1 | THRSP     | -0.176132964 | 0.000208154 |
| LA16c-329F2.1 | C19orf33  | -0.607987734 | 1.01E-45    |
| LA16c-329F2.1 | MPZL2     | -0.63053809  | 4.88E-50    |
| LA16c-329F2.1 | CTSH      | -0.484276578 | 3.41E-27    |
| LA16c-329F2.1 | CYP1B1    | -0.551175622 | 2.99E-36    |
| LA16c-329F2.1 | ALOX5     | -0.649569026 | 5.74E-54    |
| LA16c-329F2.1 | SYTL5     | -0.639508215 | 7.43E-52    |
| LA16c-329F2.1 | TNFRSF12A | -0.504419096 | 1.03E-29    |
| LA16c-329F2.1 | DUSP6     | -0.566745008 | 1.15E-38    |
| LA16c-329F2.1 | ALOX15B   | -0.643889418 | 9.14E-53    |
| LA16c-329F2.1 | SDC4      | -0.561120717 | 8.88E-38    |
| LA16c-329F2.1 | MDK       | -0.480679715 | 9.22E-27    |
| LA16c-329F2.1 | KRT19     | -0.715646262 | 4.13E-70    |
| LA16c-329F2.1 | MET       | -0.757354499 | 6.60E-83    |
| LA16c-329F2.1 | TESC      | -0.196591639 | 3.36E-05    |
| LA16c-329F2.1 | CXCL17    | -0.59036548  | 1.39E-42    |
| LA16c-329F2.1 | NPC2      | -0.311467297 | 2.49E-11    |

|               |          |              |          |
|---------------|----------|--------------|----------|
| LA16c-329F2.1 | COMP     | -0.502025868 | 2.10E-29 |
| LA16c-329F2.1 | TUSC3    | -0.518393801 | 1.46E-31 |
| LA16c-329F2.1 | TMPRSS4  | -0.755824354 | 2.16E-82 |
| LA16c-329F2.1 | LGALS3   | -0.62860243  | 1.18E-49 |
| LA16c-329F2.1 | CRLF1    | -0.509794888 | 2.05E-30 |
| LA16c-329F2.1 | CTXN1    | -0.518692937 | 1.33E-31 |
| LA16c-329F2.1 | PCSK1N   | -0.316712315 | 1.10E-11 |
| LA16c-329F2.1 | NMU      | -0.543402849 | 4.31E-35 |
| LA16c-329F2.1 | GALE     | -0.502885972 | 1.63E-29 |
| LA16c-329F2.1 | PCSK2    | -0.250723869 | 1.02E-07 |
| LA16c-329F2.1 | GJB3     | -0.542222682 | 6.43E-35 |
| LA16c-329F2.1 | SLPI     | -0.624272692 | 8.38E-49 |
| LA16c-329F2.1 | AGR2     | -0.392559902 | 1.26E-17 |
| LA16c-329F2.1 | MRC2     | -0.562385767 | 5.63E-38 |
| LA16c-329F2.1 | GOLT1A   | -0.380364268 | 1.47E-16 |
| LA16c-329F2.1 | SLC27A6  | -0.646129697 | 3.09E-53 |
| LA16c-329F2.1 | KCNN4    | -0.630578655 | 4.79E-50 |
| LA16c-329F2.1 | ETV4     | -0.418635082 | 4.69E-20 |
| LA16c-329F2.1 | SYT12    | -0.556592689 | 4.47E-37 |
| LA16c-329F2.1 | PVRL4    | -0.682669415 | 1.61E-61 |
| LA16c-329F2.1 | PLCD3    | -0.618331393 | 1.17E-47 |
| LA16c-329F2.1 | PLAU     | -0.56924348  | 4.59E-39 |
| LA16c-329F2.1 | LRRK2    | -0.28858036  | 7.24E-10 |
| LA16c-329F2.1 | SFN      | -0.612875888 | 1.25E-46 |
| LA16c-329F2.1 | LPAR5    | -0.574101848 | 7.51E-40 |
| LA16c-329F2.1 | NGEF     | -0.683538738 | 9.89E-62 |
| LA16c-329F2.1 | DTX4     | -0.616711747 | 2.38E-47 |
| LA16c-329F2.1 | CST6     | -0.543299231 | 4.47E-35 |
| LA16c-329F2.1 | QPCT     | -0.424484881 | 1.25E-20 |
| LA16c-329F2.1 | TIMP1    | -0.452789452 | 1.41E-23 |
| LA16c-329F2.1 | CAMK2N1  | -0.535745379 | 5.59E-34 |
| LA16c-329F2.1 | KLHDC8A  | -0.282798487 | 1.62E-09 |
| LA16c-329F2.1 | PDLIM4   | -0.612893192 | 1.25E-46 |
| LA16c-329F2.1 | SCEL     | -0.64615329  | 3.05E-53 |
| LA16c-329F2.1 | LCN2     | -0.687543385 | 1.02E-62 |
| LA16c-329F2.1 | PROS1    | -0.742871874 | 3.50E-78 |
| LA16c-329F2.1 | GABRB2   | -0.661973871 | 1.10E-56 |
| LA16c-329F2.1 | TMPRSS6  | -0.681735555 | 2.72E-61 |
| LA16c-329F2.1 | KLK7     | -0.528766168 | 5.45E-33 |
| LA16c-329F2.1 | PDZK1IP1 | -0.520028197 | 8.77E-32 |
| LA16c-329F2.1 | CDH3     | -0.560203168 | 1.23E-37 |
| LA16c-329F2.1 | LRP4     | -0.377224264 | 2.71E-16 |
| LA16c-329F2.1 | IGSF1    | -0.418360753 | 4.98E-20 |
| LA16c-329F2.1 | B3GNT3   | -0.767246405 | 2.50E-86 |
| LA16c-329F2.1 | CLDN1    | -0.700270485 | 5.87E-66 |
| LA16c-329F2.1 | GDF15    | -0.652126502 | 1.62E-54 |
| LA16c-329F2.1 | ARHGAP36 | -0.37138369  | 8.36E-16 |
| LA16c-329F2.1 | LAMB3    | -0.649829156 | 5.05E-54 |
| LA16c-329F2.1 | KLK10    | -0.552270326 | 2.04E-36 |
| LA16c-329F2.1 | DPP4     | -0.659060807 | 4.91E-56 |
| LA16c-329F2.1 | METTL7B  | -0.38929196  | 2.46E-17 |

|               |           |              |          |
|---------------|-----------|--------------|----------|
| LA16c-329F2.1 | LIPH      | -0.68049873  | 5.41E-61 |
| LA16c-329F2.1 | CLDN16    | -0.620646184 | 4.22E-48 |
| LA16c-329F2.1 | CHI3L1    | -0.514454825 | 4.95E-31 |
| LA16c-329F2.1 | SLC22A31  | -0.491834363 | 4.04E-28 |
| LA16c-329F2.1 | TACSTD2   | -0.626869882 | 2.60E-49 |
| LA16c-329F2.1 | SFTPB     | -0.605354942 | 3.06E-45 |
| LA16c-329F2.1 | RXRG      | -0.280804816 | 2.13E-09 |
| LA16c-329F2.1 | DCSTAMP   | -0.630046695 | 6.12E-50 |
| LA16c-329F2.1 | CITED1    | -0.323298692 | 3.87E-12 |
| LA16c-329F2.1 | SERPINA1  | -0.630597804 | 4.75E-50 |
| LA16c-329F2.1 | PRR15     | -0.369862744 | 1.12E-15 |
| LA16c-329F2.1 | SLC34A2   | -0.747315934 | 1.34E-79 |
| LA16c-329F2.1 | FN1       | -0.798630982 | 2.02E-98 |
| LA16c-329F2.1 | ZCCHC12   | -0.342468629 | 1.59E-13 |
| RP11-69E11.4  | TFF3      | 0.742769427  | 0        |
| RP11-69E11.4  | CCL21     | 0.470404005  | 1.49E-25 |
| RP11-69E11.4  | TPO       | 0.646815615  | 0        |
| RP11-69E11.4  | MT1G      | 0.616604164  | 0        |
| RP11-69E11.4  | DIO1      | 0.629168664  | 0        |
| RP11-69E11.4  | DPT       | 0.408103796  | 4.77E-19 |
| RP11-69E11.4  | CDH16     | 0.646161887  | 0        |
| RP11-69E11.4  | CRABP1    | 0.590115647  | 1.54E-42 |
| RP11-69E11.4  | SLC26A7   | 0.60121753   | 0        |
| RP11-69E11.4  | MT1H      | 0.578418428  | 1.46E-40 |
| RP11-69E11.4  | SLC26A4   | 0.64428907   | 0        |
| RP11-69E11.4  | SLC5A8    | 0.601111028  | 1.79E-44 |
| RP11-69E11.4  | PKHD1L1   | 0.572866973  | 1.19E-39 |
| RP11-69E11.4  | TFCP2L1   | 0.576732611  | 0        |
| RP11-69E11.4  | WSCD2     | 0.687406235  | 1.11E-62 |
| RP11-69E11.4  | IPCEF1    | 0.576720839  | 0        |
| RP11-69E11.4  | SLC5A5    | 0.606076612  | 2.26E-45 |
| RP11-69E11.4  | MT1F      | 0.662208915  | 0        |
| RP11-69E11.4  | FOSB      | 0.399304714  | 0        |
| RP11-69E11.4  | SEMA3D    | 0.621111983  | 3.43E-48 |
| RP11-69E11.4  | BMP8A     | 0.805546541  | 0        |
| RP11-69E11.4  | MATN2     | 0.568422799  | 0        |
| RP11-69E11.4  | PLA2R1    | 0.559132326  | 0        |
| RP11-69E11.4  | COL23A1   | 0.677183228  | 0        |
| RP11-69E11.4  | HGD       | 0.67274557   | 0        |
| RP11-69E11.4  | TCEAL2    | 0.53381071   | 0        |
| RP11-69E11.4  | CHRD1     | 0.356371337  | 1.36E-14 |
| RP11-69E11.4  | TNFRSF11B | 0.494213187  | 0        |
| RP11-69E11.4  | FAM167A   | 0.623550495  | 0        |
| RP11-69E11.4  | KIT       | 0.580401938  | 0        |
| RP11-69E11.4  | SLC4A4    | 0.596608249  | 0        |
| RP11-69E11.4  | SMOC2     | 0.547864358  | 0        |
| RP11-69E11.4  | FHL1      | 0.65049643   | 0        |
| RP11-69E11.4  | OTOS      | 0.663188016  | 0        |
| RP11-69E11.4  | IGFBPL1   | 0.548389801  | 7.85E-36 |
| RP11-69E11.4  | HBB       | 0.338261985  | 4.44E-13 |
| RP11-69E11.4  | BEX1      | 0.58144898   | 0        |

|              |            |             |          |
|--------------|------------|-------------|----------|
| RP11-69E11.4 | FABP4      | 0.557378163 | 3.38E-37 |
| RP11-69E11.4 | LMOD1      | 0.665602084 | 0        |
| RP11-69E11.4 | SOD3       | 0.644241696 | 0        |
| RP11-69E11.4 | TMEM171    | 0.559771585 | 0        |
| RP11-69E11.4 | PI16       | 0.461934744 | 0        |
| RP11-69E11.4 | ZMAT4      | 0.69757573  | 2.95E-65 |
| RP11-69E11.4 | MFAP4      | 0.370284128 | 1.02E-15 |
| RP11-69E11.4 | CWH43      | 0.571508345 | 1.98E-39 |
| RP11-69E11.4 | SPX        | 0.644140141 | 0        |
| RP11-69E11.4 | APOD       | 0.28338917  | 1.77E-09 |
| RP11-69E11.4 | DPP6       | 0.67460165  | 0        |
| RP11-69E11.4 | MMRN1      | 0.434431247 | 0        |
| RP11-69E11.4 | WDR72      | 0.510075684 | 0        |
| RP11-69E11.4 | MPPED2     | 0.711435051 | 0        |
| RP11-69E11.4 | PAPSS2     | 0.49977533  | 0        |
| RP11-69E11.4 | DCN        | 0.241009228 | 3.49E-07 |
| RP11-69E11.4 | SORBS2     | 0.610137809 | 0        |
| RP11-69E11.4 | EGR2       | 0.376119166 | 2.28E-16 |
| RP11-69E11.4 | EDN3       | 0.580992348 | 5.46E-41 |
| RP11-69E11.4 | DIO2       | 0.543804838 | 0        |
| RP11-69E11.4 | ITPR1      | 0.635634026 | 0        |
| RP11-69E11.4 | CFD        | 0.429108667 | 0        |
| RP11-69E11.4 | CPXM1      | 0.550228925 | 0        |
| RP11-69E11.4 | ELMO1      | 0.697402678 | 0        |
| RP11-69E11.4 | GPC3       | 0.553410919 | 1.37E-36 |
| RP11-69E11.4 | MYOC       | 0.37967898  | 1.68E-16 |
| RP11-69E11.4 | DEPTOR     | 0.570780842 | 0        |
| RP11-69E11.4 | DGKI       | 0.554831682 | 0        |
| RP11-69E11.4 | CARTPT     | 0.631911999 | 2.59E-50 |
| RP11-69E11.4 | IYD        | 0.371642786 | 7.38E-16 |
| RP11-69E11.4 | LYVE1      | 0.443638888 | 0        |
| RP11-69E11.4 | CLCNKB     | 0.664635181 | 0        |
| RP11-69E11.4 | NCAM1      | 0.423389936 | 0        |
| RP11-69E11.4 | HBA2       | 0.398146047 | 0        |
| RP11-69E11.4 | GLT8D2     | 0.618675411 | 0        |
| RP11-69E11.4 | OGDHL      | 0.488080717 | 0        |
| RP11-69E11.4 | LIFR       | 0.518801646 | 0        |
| RP11-69E11.4 | CSGALNACT1 | 0.403942079 | 0        |
| RP11-69E11.4 | RAP1GAP    | 0.508851346 | 0        |
| RP11-69E11.4 | COL9A3     | 0.693496768 | 0        |
| RP11-69E11.4 | FBLN1      | 0.287400466 | 1.02E-09 |
| RP11-69E11.4 | EFEMP1     | 0.387342313 | 0        |
| RP11-69E11.4 | AOX1       | 0.53574943  | 5.58E-34 |
| RP11-69E11.4 | GRIN2C     | 0.66195375  | 0        |
| RP11-69E11.4 | C11orf74   | 0.714387533 | 0        |
| RP11-69E11.4 | PPARGC1A   | 0.525315659 | 0        |
| RP11-69E11.4 | ANGPTL1    | 0.582704806 | 0        |
| RP11-69E11.4 | SCARA5     | 0.386125349 | 4.66E-17 |
| RP11-69E11.4 | LTF        | 0.585908907 | 0        |
| RP11-69E11.4 | CA4        | 0.637726705 | 1.72E-51 |
| RP11-69E11.4 | TG         | 0.580508174 | 0        |

|              |          |             |          |
|--------------|----------|-------------|----------|
| RP11-69E11.4 | FCGBP    | 0.657323051 | 0        |
| RP11-69E11.4 | PBX4     | 0.803048647 | 0        |
| RP11-69E11.4 | CYR61    | 0.422685005 | 0        |
| RP11-69E11.4 | FOS      | 0.405523422 | 0        |
| RP11-69E11.4 | KHDRBS2  | 0.653536425 | 0        |
| RP11-69E11.4 | MUM1L1   | 0.479150367 | 0        |
| RP11-69E11.4 | RGS16    | 0.602592925 | 0        |
| RP11-69E11.4 | MT1M     | 0.566363466 | 0        |
| RP11-69E11.4 | LRP2     | 0.481951083 | 0        |
| RP11-69E11.4 | MAFB     | 0.475705994 | 0        |
| RP11-69E11.4 | KCNK2    | 0.523536595 | 0        |
| RP11-69E11.4 | TBC1D4   | 0.631463163 | 0        |
| RP11-69E11.4 | MIOX     | 0.760049188 | 8.01E-84 |
| RP11-69E11.4 | TPPP     | 0.50629842  | 0        |
| RP11-69E11.4 | FMOD     | 0.511756171 | 0        |
| RP11-69E11.4 | CITED2   | 0.346924829 | 9.96E-14 |
| RP11-69E11.4 | RGS8     | 0.638435935 | 1.23E-51 |
| RP11-69E11.4 | ABI3BP   | 0.338972021 | 3.94E-13 |
| RP11-69E11.4 | ADH1B    | 0.435204273 | 1.03E-21 |
| RP11-69E11.4 | OGN      | 0.316841801 | 1.08E-11 |
| RP11-69E11.4 | NR4A1    | 0.364885381 | 3.31E-15 |
| RP11-69E11.4 | FOXJ1    | 0.677582348 | 2.71E-60 |
| RP11-69E11.4 | ALDH1A1  | 0.556427491 | 0        |
| RP11-69E11.4 | OCA2     | 0.565941413 | 1.55E-38 |
| RP11-69E11.4 | TMEM139  | 0.375453666 | 2.75E-16 |
| RP11-69E11.4 | ARHGAP24 | 0.635761821 | 0        |
| RP11-69E11.4 | SLC25A15 | 0.450777693 | 0        |
| RP11-69E11.4 | DES      | 0.34461935  | 1.10E-13 |
| RP11-69E11.4 | GDF10    | 0.574472447 | 6.53E-40 |
| RP11-69E11.4 | KIAA1324 | 0.603381255 | 0        |
| RP11-69E11.4 | JUN      | 0.427807879 | 0        |
| RP11-69E11.4 | C7       | 0.204003353 | 1.72E-05 |
| RP11-69E11.4 | LGI3     | 0.629129659 | 0        |
| RP11-69E11.4 | CDON     | 0.646629808 | 0        |
| RP11-69E11.4 | BCL2     | 0.515241676 | 0        |
| RP11-69E11.4 | HLF      | 0.645885447 | 0        |
| RP11-69E11.4 | EGR1     | 0.416584448 | 0        |
| RP11-69E11.4 | IP6K3    | 0.510299078 | 0        |
| RP11-69E11.4 | SCUBE3   | 0.527160534 | 0        |
| RP11-69E11.4 | PKNOX2   | 0.677469172 | 0        |
| RP11-69E11.4 | SMAD9    | 0.418741791 | 0        |
| RP11-69E11.4 | IQGAP2   | 0.486334134 | 0        |
| RP11-69E11.4 | GNA14    | 0.646995464 | 0        |
| RP11-69E11.4 | LAYN     | 0.636665324 | 0        |
| RP11-69E11.4 | AVPR1A   | 0.565895971 | 0        |
| RP11-69E11.4 | PDLIM3   | 0.546886391 | 0        |
| RP11-69E11.4 | GPM6A    | 0.492459371 | 0        |
| RP11-69E11.4 | SDPR     | 0.467002159 | 0        |
| RP11-69E11.4 | CRYAB    | 0.271457121 | 8.58E-09 |
| RP11-69E11.4 | FOXA2    | 0.538389998 | 2.32E-34 |
| RP11-69E11.4 | C8orf88  | 0.518753422 | 0        |

|              |          |             |             |
|--------------|----------|-------------|-------------|
| RP11-69E11.4 | ISM1     | 0.548866154 | 0           |
| RP11-69E11.4 | BMP2     | 0.276352913 | 4.52E-09    |
| RP11-69E11.4 | ID4      | 0.588908194 | 0           |
| RP11-69E11.4 | NUPR1    | 0.35916892  | 1.04E-14    |
| RP11-69E11.4 | SERTM1   | 0.454149475 | 1.00E-23    |
| RP11-69E11.4 | IRS1     | 0.575580894 | 0           |
| RP11-69E11.4 | FIBIN    | 0.289045067 | 8.13E-10    |
| RP11-69E11.4 | PODN     | 0.32757328  | 2.58E-12    |
| RP11-69E11.4 | TDRD9    | 0.407432124 | 0           |
| RP11-69E11.4 | EPHA3    | 0.431540465 | 0           |
| RP11-69E11.4 | AIF1L    | 0.38574778  | 0           |
| RP11-69E11.4 | EBF4     | 0.729639563 | 0           |
| RP11-69E11.4 | ADM2     | 0.542875805 | 0           |
| RP11-69E11.4 | GSTM3    | 0.629128382 | 0           |
| RP11-69E11.4 | HSD17B6  | 0.417560004 | 0           |
| RP11-69E11.4 | AGR3     | 0.391228674 | 1.66E-17    |
| RP11-69E11.4 | EPHB1    | 0.394488635 | 0           |
| RP11-69E11.4 | TMOD1    | 0.436744611 | 0           |
| RP11-69E11.4 | WASF3    | 0.526584392 | 0           |
| RP11-69E11.4 | SELV     | 0.665248711 | 2.01E-57    |
| RP11-69E11.4 | ENPP1    | 0.305614339 | 7.61E-11    |
| RP11-69E11.4 | SYNE1    | 0.596564513 | 1.15E-43    |
| RP11-69E11.4 | PLCH1    | 0.560721894 | 0           |
| RP11-69E11.4 | CCDC146  | 0.702069971 | 0           |
| RP11-69E11.4 | SLC16A2  | 0.622760037 | 0           |
| RP11-69E11.4 | IER2     | 0.626464539 | 0           |
| RP11-69E11.4 | KCNAB1   | 0.662337703 | 0           |
| RP11-69E11.4 | SYNDIG1  | 0.594075321 | 0           |
| RP11-69E11.4 | C16orf89 | 0.669405447 | 0           |
| RP11-69E11.4 | CTGF     | 0.278112119 | 3.58E-09    |
| RP11-69E11.4 | NR4A3    | 0.193778314 | 4.51E-05    |
| RP11-69E11.4 | KIAA1456 | 0.581996613 | 0           |
| RP11-69E11.4 | AQP4     | 0.510328296 | 0           |
| RP11-69E11.4 | RNF150   | 0.597698125 | 0           |
| RP11-69E11.4 | C1S      | 0.160459779 | 0.000750519 |
| RP11-69E11.4 | PFKFB2   | 0.396182595 | 0           |
| RP11-69E11.4 | PROX1    | 0.558938434 | 0           |
| RP11-69E11.4 | TCF7L1   | 0.742727301 | 0           |
| RP11-69E11.4 | HSPB6    | 0.485921814 | 0           |
| RP11-69E11.4 | FHDC1    | 0.422430691 | 0           |
| RP11-69E11.4 | PRR15L   | 0.458928506 | 0           |
| RP11-69E11.4 | SLC1A1   | 0.371997521 | 6.77E-16    |
| RP11-69E11.4 | BTBD11   | 0.691791743 | 0           |
| RP11-69E11.4 | TRIM58   | 0.394527782 | 0           |
| RP11-69E11.4 | LRIG1    | 0.503682517 | 0           |
| RP11-69E11.4 | ROR2     | 0.443271246 | 0           |
| RP11-69E11.4 | GPR125   | 0.578111268 | 0           |
| RP11-69E11.4 | FLRT1    | 0.750064961 | 0           |
| RP11-69E11.4 | PGF      | 0.639482068 | 0           |
| RP11-69E11.4 | DUSP1    | 0.330322651 | 1.66E-12    |
| RP11-69E11.4 | PLA2G7   | 0.442083644 | 0           |

|              |          |             |             |
|--------------|----------|-------------|-------------|
| RP11-69E11.4 | PLSCR4   | 0.454782606 | 0           |
| RP11-69E11.4 | FAM46B   | 0.380319814 | 5.03E-17    |
| RP11-69E11.4 | GLDC     | 0.517881265 | 0           |
| RP11-69E11.4 | ZBTB16   | 0.375436787 | 2.77E-16    |
| RP11-69E11.4 | OMD      | 0.24501749  | 2.01E-07    |
| RP11-69E11.4 | HSD11B2  | 0.68029088  | 0           |
| RP11-69E11.4 | FGL2     | 0.234659747 | 7.14E-07    |
| RP11-69E11.4 | CLCNKA   | 0.768027952 | 1.32E-86    |
| RP11-69E11.4 | GATM     | 0.419271127 | 0           |
| RP11-69E11.4 | TNS3     | 0.354069449 | 2.74E-14    |
| RP11-69E11.4 | TOB1     | 0.361179886 | 7.02E-15    |
| RP11-69E11.4 | MARC2    | 0.601464327 | 0           |
| RP11-69E11.4 | LRRC2    | 0.460481764 | 0           |
| RP11-69E11.4 | SORD     | 0.300772161 | 1.54E-10    |
| RP11-69E11.4 | RIMS4    | 0.526182709 | 0           |
| RP11-69E11.4 | SLC29A4  | 0.693786966 | 0           |
| RP11-69E11.4 | SLC39A14 | 0.419514804 | 0           |
| RP11-69E11.4 | FAXDC2   | 0.591910319 | 0           |
| RP11-69E11.4 | HSPB8    | 0.2744279   | 5.83E-09    |
| RP11-69E11.4 | CCL19    | 0.085607427 | 0.073156768 |
| RP11-69E11.4 | KCNIP3   | 0.692308598 | 0           |
| RP11-69E11.4 | CGNL1    | 0.526953594 | 0           |
| RP11-69E11.4 | ATF3     | 0.10900297  | 0.022403248 |
| RP11-69E11.4 | SGCD     | 0.283599656 | 1.72E-09    |
| RP11-69E11.4 | STARD13  | 0.478959738 | 0           |
| RP11-69E11.4 | LDHD     | 0.626519856 | 0           |
| RP11-69E11.4 | RCAN1    | 0.298854807 | 2.04E-10    |
| RP11-69E11.4 | ID3      | 0.511165844 | 0           |
| RP11-69E11.4 | SYTL3    | 0.573611769 | 0           |
| RP11-69E11.4 | MT1E     | 0.493340321 | 0           |
| RP11-69E11.4 | CAMK1D   | 0.541015043 | 0           |
| RP11-69E11.4 | PRKCQ    | 0.544685363 | 0           |
| RP11-69E11.4 | NUAK2    | 0.403454301 | 0           |
| RP11-69E11.4 | LIPG     | 0.53621953  | 0           |
| RP11-69E11.4 | SLC25A25 | 0.265416987 | 1.86E-08    |
| RP11-69E11.4 | PRKX     | 0.225222472 | 1.99E-06    |
| RP11-69E11.4 | SRPX     | 0.312873564 | 2.57E-11    |
| RP11-69E11.4 | FAM189A1 | 0.630863618 | 0           |
| RP11-69E11.4 | PLEKHH1  | 0.613041215 | 0           |
| RP11-69E11.4 | WNT11    | 0.606163958 | 0           |
| RP11-69E11.4 | SNAI1    | 0.479929904 | 0           |
| RP11-69E11.4 | FDCSP    | 0.093817666 | 0.049480415 |
| RP11-69E11.4 | MT1X     | 0.542224914 | 0           |
| RP11-69E11.4 | ACACB    | 0.643911074 | 0           |
| RP11-69E11.4 | ARC      | 0.258938292 | 4.16E-08    |
| RP11-69E11.4 | KLK4     | 0.244919177 | 2.03E-07    |
| RP11-69E11.4 | ZFPM2    | 0.446594916 | 0           |
| RP11-69E11.4 | AKAP12   | 0.299685831 | 1.81E-10    |
| RP11-69E11.4 | GJB6     | 0.400557335 | 2.39E-18    |
| RP11-69E11.4 | ERO1LB   | 0.558518313 | 0           |
| RP11-69E11.4 | DNALI1   | 0.6380949   | 0           |



|              |          |             |             |
|--------------|----------|-------------|-------------|
| RP11-69E11.4 | HKDC1    | 0.413931527 | 0           |
| RP11-69E11.4 | ZFP36L2  | 0.450306368 | 0           |
| RP11-69E11.4 | CAPSL    | 0.683443349 | 1.04E-61    |
| RP11-69E11.4 | CYP7B1   | 0.383820355 | 0           |
| RP11-69E11.4 | CPQ      | 0.529822959 | 0           |
| RP11-69E11.4 | RPS6KA6  | 0.585233428 | 1.05E-41    |
| RP11-69E11.4 | TLE1     | 0.478319343 | 0           |
| RP11-69E11.4 | TP53INP2 | 0.572465867 | 0           |
| RP11-69E11.4 | KATNAL2  | 0.693856892 | 0           |
| RP11-69E11.4 | SGPP2    | 0.20222968  | 2.04E-05    |
| RP11-69E11.4 | CTH      | 0.431643155 | 0           |
| RP11-69E11.4 | KIF12    | 0.584666413 | 0           |
| RP11-69E11.4 | TMEM220  | 0.584530108 | 0           |
| RP11-69E11.4 | CENPJ    | 0.514732197 | 0           |
| RP11-69E11.4 | FAM155B  | 0.560481338 | 0           |
| RP11-69E11.4 | WFS1     | 0.566414102 | 0           |
| RP11-69E11.4 | SELENBP1 | 0.643082178 | 0           |
| RP11-69E11.4 | SNTA1    | 0.555900708 | 0           |
| RP11-69E11.4 | FRAS1    | 0.142977644 | 0.002698662 |
| RP11-69E11.4 | FBLN7    | 0.570256328 | 0           |
| RP11-69E11.4 | AGPAT9   | 0.433969567 | 0           |
| RP11-69E11.4 | GPR83    | 0.495542768 | 0           |
| RP11-69E11.4 | PRTG     | 0.487266004 | 0           |
| RP11-69E11.4 | EGR3     | 0.269467714 | 1.11E-08    |
| RP11-69E11.4 | GRAMD2   | 0.416730682 | 0           |
| RP11-69E11.4 | HYOU1    | 0.446279612 | 0           |
| RP11-69E11.4 | FBLN5    | 0.41047453  | 0           |
| RP11-69E11.4 | ITM2A    | 0.540958876 | 0           |
| RP11-69E11.4 | SRF      | 0.509823214 | 0           |
| RP11-69E11.4 | FGFR2    | 0.376758284 | 1.88E-16    |
| RP11-69E11.4 | MT1A     | 0.32150635  | 5.16E-12    |
| RP11-69E11.4 | MAMDC2   | 0.286230309 | 1.20E-09    |
| RP11-69E11.4 | FHL2     | 0.421887597 | 0           |
| RP11-69E11.4 | FTCDNL1  | 0.393759166 | 0           |
| RP11-69E11.4 | PKIA     | 0.417089956 | 0           |
| RP11-69E11.4 | DNAJB4   | 0.362917533 | 4.96E-15    |
| RP11-69E11.4 | SLC25A33 | 0.599029125 | 0           |
| RP11-69E11.4 | EYA2     | 0.339341223 | 3.70E-13    |
| RP11-69E11.4 | LPAR1    | 0.200990023 | 2.30E-05    |
| RP11-69E11.4 | STX11    | 0.219022345 | 3.82E-06    |
| RP11-69E11.4 | ARHGEF28 | 0.416576789 | 0           |
| RP11-69E11.4 | OR2W3    | 0.501981323 | 0           |
| RP11-69E11.4 | ALDH1B1  | 0.386208197 | 4.58E-17    |
| RP11-69E11.4 | CXCL12   | 0.320921119 | 7.42E-12    |
| RP11-69E11.4 | OLFM2    | 0.645225762 | 0           |
| RP11-69E11.4 | TUB      | 0.40687598  | 0           |
| RP11-69E11.4 | HTRA3    | 0.367922824 | 1.73E-15    |
| RP11-69E11.4 | CKB      | 0.61841897  | 0           |
| RP11-69E11.4 | RGS2     | 0.12757867  | 0.007476152 |
| RP11-69E11.4 | SHANK2   | 0.565661231 | 0           |
| RP11-69E11.4 | CNTFR    | 0.60274063  | 9.12E-45    |

|              |          |             |             |
|--------------|----------|-------------|-------------|
| RP11-69E11.4 | CYTH3    | 0.557379928 | 0           |
| RP11-69E11.4 | PLAC9    | 0.592937929 | 0           |
| RP11-69E11.4 | WVOX     | 0.607573252 | 0           |
| RP11-69E11.4 | NPR3     | 0.453486357 | 0           |
| RP11-69E11.4 | SDC2     | 0.374143942 | 3.94E-16    |
| RP11-69E11.4 | KLF15    | 0.519229285 | 0           |
| RP11-69E11.4 | TMEM164  | 0.519423744 | 0           |
| RP11-69E11.4 | LONRF3   | 0.202971913 | 1.90E-05    |
| RP11-69E11.4 | GBP1     | 0.173073072 | 0.000274391 |
| RP11-69E11.4 | ARHGAP6  | 0.371276279 | 8.06E-16    |
| RP11-69E11.4 | TMEM119  | 0.249996596 | 1.23E-07    |
| RP11-69E11.4 | SH3RF1   | 0.322691104 | 5.62E-12    |
| RP11-69E11.4 | CRELD2   | 0.634778606 | 0           |
| RP11-69E11.4 | PCP4     | 0.149865397 | 0.001655856 |
| RP11-69E11.4 | GCSH     | 0.662745201 | 0           |
| RP11-69E11.4 | IMPA2    | 0.484551383 | 0           |
| RP11-69E11.4 | C1R      | 0.165635984 | 0.000500861 |
| RP11-69E11.4 | SUCNR1   | 0.412068921 | 0           |
| RP11-69E11.4 | SFRP1    | 0.488913726 | 0           |
| RP11-69E11.4 | UGT8     | 0.4300794   | 0           |
| RP11-69E11.4 | TLE4     | 0.308342576 | 5.07E-11    |
| RP11-69E11.4 | ANTXR1   | 0.407316385 | 0           |
| RP11-69E11.4 | GPX3     | 0.409590743 | 0           |
| RP11-69E11.4 | DPY19L2  | 0.672185313 | 0           |
| RP11-69E11.4 | FAM46C   | 0.386388174 | 0           |
| RP11-69E11.4 | IL33     | 0.315768542 | 1.28E-11    |
| RP11-69E11.4 | PEG3     | 0.476619993 | 0           |
| RP11-69E11.4 | FAHD2A   | 0.724230463 | 0           |
| RP11-69E11.4 | PTGDS    | 0.196330106 | 3.56E-05    |
| RP11-69E11.4 | CHCHD10  | 0.492576812 | 0           |
| RP11-69E11.4 | CD36     | 0.52078453  | 0           |
| RP11-69E11.4 | ANKRD37  | 0.639751416 | 0           |
| RP11-69E11.4 | TSPAN33  | 0.559873992 | 0           |
| RP11-69E11.4 | PRDM16   | 0.543327414 | 0           |
| RP11-69E11.4 | UST      | 0.502655475 | 0           |
| RP11-69E11.4 | NEXN     | 0.532689629 | 0           |
| RP11-69E11.4 | NUPR1L   | 0.364062926 | 3.32E-15    |
| RP11-69E11.4 | SLC24A3  | 0.476865655 | 0           |
| RP11-69E11.4 | MARC1    | 0.619145601 | 0           |
| RP11-69E11.4 | MYH11    | 0.401961182 | 0           |
| RP11-69E11.4 | APOA1    | 0.678150723 | 1.98E-60    |
| RP11-69E11.4 | TMEM178B | 0.418476981 | 0           |
| RP11-69E11.4 | CAPN6    | 0.29876169  | 1.68E-10    |
| RP11-69E11.4 | PPM1L    | 0.531059779 | 0           |
| RP11-69E11.4 | FZD8     | 0.644486649 | 0           |
| RP11-69E11.4 | RCAN2    | 0.603911584 | 0           |
| RP11-69E11.4 | COPZ2    | 0.606011767 | 0           |
| RP11-69E11.4 | GAS1     | 0.310842456 | 3.49E-11    |
| RP11-69E11.4 | DACT1    | 0.451029596 | 0           |
| RP11-69E11.4 | WBSCR17  | 0.56736129  | 0           |
| RP11-69E11.4 | NCS1     | 0.451116684 | 0           |

|              |          |             |             |
|--------------|----------|-------------|-------------|
| RP11-69E11.4 | SPIRE2   | 0.548823887 | 0           |
| RP11-69E11.4 | C15orf52 | 0.441331198 | 0           |
| RP11-69E11.4 | SPAG5    | 0.544368357 | 0           |
| RP11-69E11.4 | ARL4D    | 0.465183807 | 0           |
| RP11-69E11.4 | FAM189A2 | 0.552296059 | 0           |
| RP11-69E11.4 | MAP1LC3A | 0.752455343 | 0           |
| RP11-69E11.4 | KLF6     | 0.053036591 | 0.267378665 |
| RP11-69E11.4 | ADD3     | 0.380281235 | 5.13E-17    |
| RP11-69E11.4 | TSPAN7   | 0.505164574 | 0           |
| RP11-69E11.4 | KLF9     | 0.376867357 | 1.82E-16    |
| RP11-69E11.4 | KCNQ1    | 0.589300658 | 0           |
| RP11-69E11.4 | MAN1A1   | 0.154391561 | 0.001187937 |
| RP11-69E11.4 | MLF1     | 0.359721091 | 9.35E-15    |
| RP11-69E11.4 | RARB     | 0.587136932 | 0           |
| RP11-69E11.4 | CDC42EP2 | 0.561609795 | 0           |
| RP11-69E11.4 | FAM3B    | 0.227674694 | 1.53E-06    |
| RP11-69E11.4 | GADD45B  | 0.292682055 | 4.90E-10    |
| RP11-69E11.4 | TMEM47   | 0.47298726  | 0           |
| RP11-69E11.4 | SDF2L1   | 0.571192453 | 0           |
| RP11-69E11.4 | CCDC85A  | 0.210432263 | 9.16E-06    |
| RP11-69E11.4 | CRYBG3   | 0.050083258 | 0.294962341 |
| RP11-69E11.4 | FBLN2    | 0.168688035 | 0.00039242  |
| RP11-69E11.4 | PEBP4    | 0.349566546 | 6.22E-14    |
| RP11-69E11.4 | CDADC1   | 0.658863686 | 0           |
| RP11-69E11.4 | FAM63A   | 0.484990511 | 0           |
| RP11-69E11.4 | GLUL     | 0.371471163 | 7.69E-16    |
| RP11-69E11.4 | FREM2    | 0.338817702 | 4.04E-13    |
| RP11-69E11.4 | ACKR3    | 0.532728634 | 0           |
| RP11-69E11.4 | DENND6A  | 0.545309021 | 0           |
| RP11-69E11.4 | CLDN8    | 0.139028047 | 0.003538416 |
| RP11-69E11.4 | UTS2R    | 0.184119857 | 0.000104473 |
| RP11-69E11.4 | SCNN1B   | 0.415581376 | 0           |
| RP11-69E11.4 | TTC30A   | 0.434541313 | 0           |
| RP11-69E11.4 | CORO2B   | 0.655084861 | 0           |
| RP11-69E11.4 | TC2N     | 0.221812991 | 2.86E-06    |
| RP11-69E11.4 | ALDH2    | 0.60438915  | 0           |
| RP11-69E11.4 | GPR183   | 0.033308039 | 0.486226415 |
| RP11-69E11.4 | C4orf47  | 0.70867944  | 0           |
| RP11-69E11.4 | SLC25A42 | 0.68333669  | 0           |
| RP11-69E11.4 | LGMN     | 0.471619808 | 0           |
| RP11-69E11.4 | ACSF2    | 0.617999699 | 0           |
| RP11-69E11.4 | KIAA1467 | 0.456230338 | 0           |
| RP11-69E11.4 | PRKG1    | 0.600026524 | 0           |
| RP11-69E11.4 | GNAI1    | 0.536357112 | 0           |
| RP11-69E11.4 | ABCC4    | 0.269743871 | 1.07E-08    |
| RP11-69E11.4 | PRPS1    | 0.482077886 | 0           |
| RP11-69E11.4 | TSPAN5   | 0.378703155 | 9.83E-17    |
| RP11-69E11.4 | CR2      | 0.196447008 | 3.40E-05    |
| RP11-69E11.4 | CCDC170  | 0.388868338 | 0           |
| RP11-69E11.4 | RRAD     | 0.069615508 | 0.145285556 |
| RP11-69E11.4 | SCGB2A1  | 0.509310615 | 0           |

|              |          |              |             |
|--------------|----------|--------------|-------------|
| RP11-69E11.4 | SESN3    | 0.248822043  | 1.41E-07    |
| RP11-69E11.4 | SGK223   | 0.277974112  | 3.65E-09    |
| RP11-69E11.4 | NDRG2    | 0.685977414  | 0           |
| RP11-69E11.4 | C3orf52  | 0.258402432  | 4.45E-08    |
| RP11-69E11.4 | FLRT3    | -0.370605957 | 9.43E-16    |
| RP11-69E11.4 | MST1R    | -0.495866157 | 0           |
| RP11-69E11.4 | SDC1     | -0.415346919 | 0           |
| RP11-69E11.4 | ST8SIA4  | -0.55025786  | 0           |
| RP11-69E11.4 | UBTD1    | -0.229769344 | 1.22E-06    |
| RP11-69E11.4 | EPHA2    | -0.417210376 | 0           |
| RP11-69E11.4 | TMEM130  | -0.223206824 | 2.47E-06    |
| RP11-69E11.4 | SPINK2   | -0.407179086 | 0           |
| RP11-69E11.4 | MMP16    | -0.564385547 | 0           |
| RP11-69E11.4 | SIGLEC15 | -0.462403657 | 0           |
| RP11-69E11.4 | RIN1     | -0.392048185 | 0           |
| RP11-69E11.4 | IL1RN    | -0.561926517 | 0           |
| RP11-69E11.4 | FCER1G   | -0.263963724 | 2.23E-08    |
| RP11-69E11.4 | CD276    | -0.541516438 | 0           |
| RP11-69E11.4 | CTSB     | -0.488408219 | 0           |
| RP11-69E11.4 | FAM171A2 | -0.125768119 | 0.008372631 |
| RP11-69E11.4 | ASPHD1   | -0.495527733 | 0           |
| RP11-69E11.4 | C15orf48 | -0.371340815 | 7.93E-16    |
| RP11-69E11.4 | DYSF     | -0.143299756 | 0.002638913 |
| RP11-69E11.4 | PDZRN4   | -0.091702386 | 0.054888202 |
| RP11-69E11.4 | EFHD2    | -0.124962059 | 0.008801721 |
| RP11-69E11.4 | ASF1B    | -0.411740852 | 0           |
| RP11-69E11.4 | AQP1     | -0.085670195 | 0.07295511  |
| RP11-69E11.4 | ARRDC2   | -0.264516747 | 2.08E-08    |
| RP11-69E11.4 | PRSS1    | -0.318883359 | 7.82E-12    |
| RP11-69E11.4 | MAPK13   | -0.564656031 | 0           |
| RP11-69E11.4 | CST5     | -0.546483663 | 1.51E-35    |
| RP11-69E11.4 | AHR      | -0.601947707 | 0           |
| RP11-69E11.4 | BAX      | -0.324703489 | 4.09E-12    |
| RP11-69E11.4 | C1orf115 | -0.28635158  | 1.18E-09    |
| RP11-69E11.4 | PLK3     | -0.359095306 | 1.06E-14    |
| RP11-69E11.4 | JAG2     | -0.1225765   | 0.010188689 |
| RP11-69E11.4 | RAD23B   | -0.601629992 | 0           |
| RP11-69E11.4 | CA12     | 0.140274937  | 0.003250687 |
| RP11-69E11.4 | ADTRP    | -0.310838626 | 3.49E-11    |
| RP11-69E11.4 | UCP2     | -0.276041297 | 4.71E-09    |
| RP11-69E11.4 | IGFBP2   | -0.217026129 | 4.70E-06    |
| RP11-69E11.4 | LOXL2    | -0.205034651 | 1.56E-05    |
| RP11-69E11.4 | GPX1     | -0.301814239 | 1.33E-10    |
| RP11-69E11.4 | P3H3     | -0.355554909 | 2.07E-14    |
| RP11-69E11.4 | C2orf81  | -0.247160846 | 1.71E-07    |
| RP11-69E11.4 | CDT1     | -0.446319468 | 0           |
| RP11-69E11.4 | SNX25    | -0.291473886 | 5.80E-10    |
| RP11-69E11.4 | MTHFD1L  | -0.584778181 | 0           |
| RP11-69E11.4 | CDC42BPG | -0.644033857 | 8.52E-53    |
| RP11-69E11.4 | MSN      | -0.66837344  | 0           |
| RP11-69E11.4 | SIGLEC6  | -0.45555434  | 7.03E-24    |

|              |          |              |             |
|--------------|----------|--------------|-------------|
| RP11-69E11.4 | F2R      | -0.200183963 | 2.48E-05    |
| RP11-69E11.4 | TMEM184A | -0.444098582 | 0           |
| RP11-69E11.4 | CKS2     | -0.309870588 | 4.04E-11    |
| RP11-69E11.4 | TAX1BP3  | -0.4140823   | 0           |
| RP11-69E11.4 | PMEP A1  | -0.357997061 | 1.31E-14    |
| RP11-69E11.4 | CXCL16   | -0.599618174 | 0           |
| RP11-69E11.4 | FAXC     | -0.592250161 | 0           |
| RP11-69E11.4 | VTCN1    | -0.55903362  | 1.88E-37    |
| RP11-69E11.4 | SH2D4A   | -0.561473631 | 0           |
| RP11-69E11.4 | RNF24    | -0.521688316 | 0           |
| RP11-69E11.4 | LY6G6C   | -0.506323492 | 5.84E-30    |
| RP11-69E11.4 | NID1     | -0.371991705 | 6.78E-16    |
| RP11-69E11.4 | STAC     | -0.648867431 | 0           |
| RP11-69E11.4 | RAB34    | -0.369139361 | 1.32E-15    |
| RP11-69E11.4 | HES4     | -0.092879918 | 0.051836121 |
| RP11-69E11.4 | EPHA10   | -0.55592397  | 0           |
| RP11-69E11.4 | ENTPD2   | -0.343097638 | 1.94E-13    |
| RP11-69E11.4 | DDB2     | -0.473950902 | 0           |
| RP11-69E11.4 | NKAIN4   | -0.162891577 | 0.000621555 |
| RP11-69E11.4 | TRIM29   | -0.443096929 | 0           |
| RP11-69E11.4 | ADCY8    | -0.512004302 | 1.05E-30    |
| RP11-69E11.4 | SFTA2    | -0.444168083 | 0           |
| RP11-69E11.4 | NRIP1    | -0.565009631 | 0           |
| RP11-69E11.4 | VWA1     | 0.066686713  | 0.163012953 |
| RP11-69E11.4 | APLNR    | -0.089287892 | 0.061614838 |
| RP11-69E11.4 | REN      | -0.378644703 | 2.05E-16    |
| RP11-69E11.4 | EDIL3    | -0.169150424 | 0.000378043 |
| RP11-69E11.4 | AGRN     | -0.454794237 | 0           |
| RP11-69E11.4 | TREM1    | -0.423034634 | 0           |
| RP11-69E11.4 | SRL      | -0.363446586 | 4.45E-15    |
| RP11-69E11.4 | RASGRF1  | -0.462570316 | 0           |
| RP11-69E11.4 | RMI2     | -0.441921666 | 0           |
| RP11-69E11.4 | SAMD1    | -0.3191995   | 9.71E-12    |
| RP11-69E11.4 | MGAT4B   | -0.581997464 | 0           |
| RP11-69E11.4 | NXN      | -0.508320024 | 0           |
| RP11-69E11.4 | SH3BGRL3 | -0.329555312 | 1.87E-12    |
| RP11-69E11.4 | CA11     | -0.152860146 | 0.001330528 |
| RP11-69E11.4 | PLD3     | -0.171037141 | 0.000324319 |
| RP11-69E11.4 | LURAP1L  | -0.562557125 | 0           |
| RP11-69E11.4 | CARNS1   | -0.149797031 | 0.00166407  |
| RP11-69E11.4 | PDLIM7   | -0.190684279 | 5.98E-05    |
| RP11-69E11.4 | BCL2L1   | -0.610233975 | 0           |
| RP11-69E11.4 | GGT6     | -0.337987672 | 4.65E-13    |
| RP11-69E11.4 | DPYSL3   | -0.312863209 | 2.57E-11    |
| RP11-69E11.4 | FYN      | -0.477277975 | 0           |
| RP11-69E11.4 | TK1      | -0.342443343 | 2.18E-13    |
| RP11-69E11.4 | AK1      | -0.109667052 | 0.021593896 |
| RP11-69E11.4 | HIGD1B   | 0.071853698  | 0.132761166 |
| RP11-69E11.4 | TMEM59L  | -0.274365208 | 5.87E-09    |
| RP11-69E11.4 | MEGF9    | -0.56790169  | 0           |
| RP11-69E11.4 | ZFP36L1  | -0.537344866 | 0           |

|              |          |              |            |
|--------------|----------|--------------|------------|
| RP11-69E11.4 | ADRA1B   | -0.290373514 | 6.76E-10   |
| RP11-69E11.4 | EPHA4    | -0.559920231 | 0          |
| RP11-69E11.4 | TCERG1L  | -0.144133616 | 0.0024898  |
| RP11-69E11.4 | NGFR     | -0.221524352 | 2.95E-06   |
| RP11-69E11.4 | EBI3     | -0.44565255  | 0          |
| RP11-69E11.4 | S100A10  | -0.427464491 | 0          |
| RP11-69E11.4 | S100B    | -0.302911065 | 1.13E-10   |
| RP11-69E11.4 | CD44     | -0.247519978 | 1.64E-07   |
| RP11-69E11.4 | BHLHE41  | -0.448666731 | 0          |
| RP11-69E11.4 | FBXO2    | -0.263958476 | 2.23E-08   |
| RP11-69E11.4 | SLC30A2  | -0.430484913 | 0          |
| RP11-69E11.4 | FRMD5    | -0.595184629 | 0          |
| RP11-69E11.4 | SAMD11   | -0.201767007 | 2.13E-05   |
| RP11-69E11.4 | SIPA1L2  | -0.446027284 | 0          |
| RP11-69E11.4 | S100A16  | -0.502056638 | 0          |
| RP11-69E11.4 | PPL      | -0.663366022 | 0          |
| RP11-69E11.4 | ARHGDIB  | -0.120845803 | 0.0113131  |
| RP11-69E11.4 | CDC42EP3 | -0.556006519 | 0          |
| RP11-69E11.4 | RUNX2    | -0.403991155 | 0          |
| RP11-69E11.4 | LAMC2    | -0.620207678 | 0          |
| RP11-69E11.4 | BRINP1   | -0.457330001 | 0          |
| RP11-69E11.4 | GPRC5B   | -0.541562109 | 0          |
| RP11-69E11.4 | AQP5     | -0.09400653  | 0.04904989 |
| RP11-69E11.4 | PLAG1    | -0.310836924 | 3.49E-11   |
| RP11-69E11.4 | PTPRU    | -0.602343717 | 0          |
| RP11-69E11.4 | ANGPTL4  | -0.385276171 | 0          |
| RP11-69E11.4 | PALM3    | -0.244631748 | 2.30E-07   |
| RP11-69E11.4 | ACP5     | -0.327602782 | 2.57E-12   |
| RP11-69E11.4 | DLG4     | -0.200811025 | 2.34E-05   |
| RP11-69E11.4 | ETNK2    | -0.39056854  | 0          |
| RP11-69E11.4 | CD109    | -0.516557925 | 0          |
| RP11-69E11.4 | SNX22    | -0.221804339 | 2.86E-06   |
| RP11-69E11.4 | TMEM98   | -0.535199437 | 0          |
| RP11-69E11.4 | CTHRC1   | -0.290039346 | 7.08E-10   |
| RP11-69E11.4 | S100A2   | -0.39081789  | 0          |
| RP11-69E11.4 | C11orf80 | -0.500674294 | 0          |
| RP11-69E11.4 | SREBF1   | -0.421576832 | 0          |
| RP11-69E11.4 | PRSS22   | -0.464425971 | 0          |
| RP11-69E11.4 | CMTM3    | -0.352268969 | 3.81E-14   |
| RP11-69E11.4 | RDH5     | -0.431809104 | 0          |
| RP11-69E11.4 | MYH10    | -0.559534859 | 0          |
| RP11-69E11.4 | EVPL     | -0.504428723 | 0          |
| RP11-69E11.4 | SCD      | -0.520058891 | 0          |
| RP11-69E11.4 | CD151    | -0.346030972 | 1.17E-13   |
| RP11-69E11.4 | S100A4   | -0.366898901 | 2.16E-15   |
| RP11-69E11.4 | BNIP1    | -0.276065268 | 4.70E-09   |
| RP11-69E11.4 | MAP3K6   | -0.419847979 | 0          |
| RP11-69E11.4 | MANEAL   | -0.483157408 | 0          |
| RP11-69E11.4 | CD207    | -0.316016898 | 1.23E-11   |
| RP11-69E11.4 | CD1A     | -0.340113785 | 2.38E-13   |
| RP11-69E11.4 | C3       | -0.384632089 | 0          |

|              |          |              |             |
|--------------|----------|--------------|-------------|
| RP11-69E11.4 | NT5E     | -0.470065841 | 0           |
| RP11-69E11.4 | CACNG4   | -0.512706985 | 8.46E-31    |
| RP11-69E11.4 | FHOD1    | -0.299297339 | 1.91E-10    |
| RP11-69E11.4 | LEMD1    | -0.528533518 | 0           |
| RP11-69E11.4 | ATP11A   | -0.304608005 | 8.82E-11    |
| RP11-69E11.4 | PPAP2C   | -0.319987121 | 8.59E-12    |
| RP11-69E11.4 | DRAM1    | -0.583465336 | 0           |
| RP11-69E11.4 | CDA      | -0.089504052 | 0.060986125 |
| RP11-69E11.4 | CCND2    | -0.26798892  | 1.34E-08    |
| RP11-69E11.4 | LCN6     | -0.110287735 | 0.020818998 |
| RP11-69E11.4 | CDH4     | -0.42325363  | 0           |
| RP11-69E11.4 | MMP11    | -0.391850322 | 0           |
| RP11-69E11.4 | B3GAT1   | -0.351653821 | 4.27E-14    |
| RP11-69E11.4 | SPP1     | -0.364727659 | 3.42E-15    |
| RP11-69E11.4 | HLA-DQB1 | -0.347278145 | 9.36E-14    |
| RP11-69E11.4 | SDC3     | -0.469072555 | 0           |
| RP11-69E11.4 | CX3CL1   | -0.411025709 | 0           |
| RP11-69E11.4 | SDK1     | -0.373856864 | 4.24E-16    |
| RP11-69E11.4 | DOCK9    | -0.624728169 | 0           |
| RP11-69E11.4 | CSF2     | -0.451200303 | 2.10E-23    |
| RP11-69E11.4 | GRHL3    | -0.610075259 | 0           |
| RP11-69E11.4 | TMEM92   | -0.52999162  | 3.67E-33    |
| RP11-69E11.4 | BASP1    | -0.462628894 | 0           |
| RP11-69E11.4 | HRH1     | -0.549737459 | 0           |
| RP11-69E11.4 | ESM1     | -0.053585926 | 0.262449729 |
| RP11-69E11.4 | B4GALNT3 | -0.53105141  | 0           |
| RP11-69E11.4 | LMO3     | -0.269664016 | 1.08E-08    |
| RP11-69E11.4 | C9orf16  | -0.371902206 | 6.93E-16    |
| RP11-69E11.4 | SEMA3F   | -0.146652076 | 0.002084904 |
| RP11-69E11.4 | PLA2G12B | -0.281135393 | 2.04E-09    |
| RP11-69E11.4 | KLK6     | -0.439359237 | 3.82E-22    |
| RP11-69E11.4 | ST3GAL5  | -0.324860361 | 3.99E-12    |
| RP11-69E11.4 | FAM132B  | -0.157207879 | 0.000961838 |
| RP11-69E11.4 | CDKN1A   | -0.37146549  | 7.70E-16    |
| RP11-69E11.4 | E2F1     | -0.461070104 | 0           |
| RP11-69E11.4 | B3GNT8   | -0.260575802 | 3.40E-08    |
| RP11-69E11.4 | MTMR11   | -0.490100052 | 0           |
| RP11-69E11.4 | MYO1G    | -0.433160387 | 0           |
| RP11-69E11.4 | TMSB10   | -0.318887316 | 1.02E-11    |
| RP11-69E11.4 | UNC5CL   | -0.49676044  | 0           |
| RP11-69E11.4 | ABR      | -0.554625451 | 0           |
| RP11-69E11.4 | PLP2     | -0.427173867 | 0           |
| RP11-69E11.4 | SRCIN1   | -0.435505947 | 0           |
| RP11-69E11.4 | PDE9A    | -0.540065302 | 0           |
| RP11-69E11.4 | TREM2    | -0.278465861 | 3.42E-09    |
| RP11-69E11.4 | KDELR3   | -0.448572409 | 0           |
| RP11-69E11.4 | PC       | -0.518508895 | 0           |
| RP11-69E11.4 | C2CD4A   | -0.577677389 | 0           |
| RP11-69E11.4 | PELI1    | -0.531769957 | 0           |
| RP11-69E11.4 | SSX1     | -0.313598777 | 2.30E-11    |
| RP11-69E11.4 | MROH6    | -0.452719018 | 0           |

|              |          |              |             |
|--------------|----------|--------------|-------------|
| RP11-69E11.4 | ESPN     | -0.351917922 | 4.06E-14    |
| RP11-69E11.4 | BMP1     | -0.275383882 | 5.14E-09    |
| RP11-69E11.4 | TM4SF4   | -0.448875266 | 3.75E-23    |
| RP11-69E11.4 | CORO2A   | -0.561179461 | 0           |
| RP11-69E11.4 | CD164L2  | -0.402455002 | 1.60E-18    |
| RP11-69E11.4 | CTSS     | -0.492596244 | 0           |
| RP11-69E11.4 | CLU      | -0.359237852 | 1.03E-14    |
| RP11-69E11.4 | TMSB4X   | -0.380484487 | 4.65E-17    |
| RP11-69E11.4 | WNT10A   | -0.428751253 | 4.67E-21    |
| RP11-69E11.4 | NAPSA    | -0.339053294 | 3.89E-13    |
| RP11-69E11.4 | PLEKHA4  | -0.431773361 | 0           |
| RP11-69E11.4 | SFTPA1   | -0.043512988 | 0.363070524 |
| RP11-69E11.4 | C1orf116 | -0.566200495 | 0           |
| RP11-69E11.4 | TM4SF1   | -0.418453294 | 0           |
| RP11-69E11.4 | SEL1L3   | -0.563219646 | 0           |
| RP11-69E11.4 | VASN     | -0.455818585 | 0           |
| RP11-69E11.4 | NPTXR    | -0.628725281 | 0           |
| RP11-69E11.4 | PDE4C    | -0.486883895 | 0           |
| RP11-69E11.4 | CDC42EP1 | -0.480548881 | 0           |
| RP11-69E11.4 | ENDOD1   | -0.686269598 | 0           |
| RP11-69E11.4 | RYR1     | -0.460543605 | 0           |
| RP11-69E11.4 | IL1RAP   | -0.607725727 | 0           |
| RP11-69E11.4 | SLC35F2  | -0.599506995 | 3.47E-44    |
| RP11-69E11.4 | ISYNA1   | -0.190516202 | 6.07E-05    |
| RP11-69E11.4 | HLA-G    | -0.526927212 | 0           |
| RP11-69E11.4 | CDKN2B   | -0.497287365 | 0           |
| RP11-69E11.4 | ALDH1A3  | -0.507159797 | 0           |
| RP11-69E11.4 | CLIP3    | -0.336958359 | 5.53E-13    |
| RP11-69E11.4 | ULBP2    | -0.459339266 | 0           |
| RP11-69E11.4 | ETHE1    | -0.588448926 | 0           |
| RP11-69E11.4 | XPR1     | -0.550788189 | 0           |
| RP11-69E11.4 | SPTBN2   | -0.679208237 | 0           |
| RP11-69E11.4 | IVL      | -0.517187008 | 2.13E-31    |
| RP11-69E11.4 | MARCO    | -0.439143786 | 0           |
| RP11-69E11.4 | PLXND1   | -0.224102951 | 2.25E-06    |
| RP11-69E11.4 | EMILIN2  | -0.404198237 | 0           |
| RP11-69E11.4 | PLAUR    | -0.460447439 | 0           |
| RP11-69E11.4 | CDC42EP5 | -0.379823101 | 6.30E-17    |
| RP11-69E11.4 | TRPC5    | -0.329131323 | 1.50E-12    |
| RP11-69E11.4 | TMEM100  | -0.29910983  | 1.96E-10    |
| RP11-69E11.4 | QSOX1    | -0.590886964 | 0           |
| RP11-69E11.4 | ARHGAP23 | -0.487178774 | 0           |
| RP11-69E11.4 | MDFI     | -0.291855996 | 5.50E-10    |
| RP11-69E11.4 | FSTL3    | -0.5031546   | 0           |
| RP11-69E11.4 | INF2     | -0.434370825 | 0           |
| RP11-69E11.4 | TGFBR1   | -0.616417506 | 0           |
| RP11-69E11.4 | TGFBI    | -0.254787429 | 6.91E-08    |
| RP11-69E11.4 | ERBB3    | -0.652640582 | 0           |
| RP11-69E11.4 | CCL18    | -0.33223802  | 1.21E-12    |
| RP11-69E11.4 | CCL17    | -0.342438817 | 1.60E-13    |
| RP11-69E11.4 | C16orf45 | -0.351164199 | 4.66E-14    |



|              |           |              |             |
|--------------|-----------|--------------|-------------|
| RP11-69E11.4 | PRDM1     | -0.343605557 | 1.78E-13    |
| RP11-69E11.4 | TRIM47    | -0.47722507  | 0           |
| RP11-69E11.4 | CNFN      | -0.379674597 | 6.71E-17    |
| RP11-69E11.4 | ARMCX3    | -0.405482714 | 0           |
| RP11-69E11.4 | RAMP1     | -0.251539926 | 1.02E-07    |
| RP11-69E11.4 | GABRD     | 0.014448949  | 0.76264373  |
| RP11-69E11.4 | COL13A1   | -0.128793221 | 0.006923909 |
| RP11-69E11.4 | S100A5    | -0.396618461 | 0           |
| RP11-69E11.4 | MISP      | -0.466850677 | 0           |
| RP11-69E11.4 | HES6      | -0.207660198 | 1.20E-05    |
| RP11-69E11.4 | PSD3      | -0.609867326 | 0           |
| RP11-69E11.4 | DOK7      | -0.511154214 | 0           |
| RP11-69E11.4 | ZMAT3     | -0.690717894 | 0           |
| RP11-69E11.4 | MFAP2     | -0.269983433 | 1.04E-08    |
| RP11-69E11.4 | TMEM79    | -0.489754395 | 0           |
| RP11-69E11.4 | SLC1A5    | -0.394943932 | 0           |
| RP11-69E11.4 | BBC3      | -0.420312212 | 0           |
| RP11-69E11.4 | HLA-DQB2  | -0.301648573 | 1.36E-10    |
| RP11-69E11.4 | C1QL1     | -0.353681666 | 2.94E-14    |
| RP11-69E11.4 | TMEM215   | -0.186006764 | 8.84E-05    |
| RP11-69E11.4 | PNP       | -0.457368155 | 0           |
| RP11-69E11.4 | ARNTL     | -0.481669537 | 0           |
| RP11-69E11.4 | CLDN2     | -0.280539175 | 2.21E-09    |
| RP11-69E11.4 | MVP       | -0.50991243  | 0           |
| RP11-69E11.4 | LGALS1    | -0.328605571 | 2.19E-12    |
| RP11-69E11.4 | BIRC7     | -0.353817372 | 2.16E-14    |
| RP11-69E11.4 | COL8A1    | -0.615216997 | 0           |
| RP11-69E11.4 | PERP      | -0.66480113  | 0           |
| RP11-69E11.4 | GJA4      | -0.173155763 | 0.000272523 |
| RP11-69E11.4 | IGFL2     | -0.433866808 | 1.41E-21    |
| RP11-69E11.4 | DAPK2     | -0.465935402 | 0           |
| RP11-69E11.4 | MAMLD1    | -0.548747578 | 0           |
| RP11-69E11.4 | ETV5      | -0.315412874 | 1.74E-11    |
| RP11-69E11.4 | RUNX1     | -0.669641039 | 0           |
| RP11-69E11.4 | LONRF2    | -0.322661744 | 5.65E-12    |
| RP11-69E11.4 | SPOCK1    | -0.173353909 | 0.000268097 |
| RP11-69E11.4 | XKRX      | -0.468851573 | 0           |
| RP11-69E11.4 | TGFB1     | -0.178982432 | 0.000167145 |
| RP11-69E11.4 | ERP27     | -0.322362326 | 5.92E-12    |
| RP11-69E11.4 | TNFRSF10C | -0.528388844 | 0           |
| RP11-69E11.4 | PALM      | -0.451921326 | 0           |
| RP11-69E11.4 | TSC22D1   | -0.295620211 | 3.23E-10    |
| RP11-69E11.4 | TGM2      | -0.529720411 | 0           |
| RP11-69E11.4 | UBE2QL1   | -0.251766723 | 9.93E-08    |
| RP11-69E11.4 | ECE1      | -0.505938437 | 0           |
| RP11-69E11.4 | COL8A2    | -0.536029468 | 0           |
| RP11-69E11.4 | HIST3H2A  | -0.446942275 | 0           |
| RP11-69E11.4 | TNFRSF21  | -0.598063072 | 0           |
| RP11-69E11.4 | SOX4      | -0.573675312 | 0           |
| RP11-69E11.4 | ELF3      | -0.635366238 | 0           |
| RP11-69E11.4 | TPD52L1   | -0.527935532 | 0           |

|              |            |              |             |
|--------------|------------|--------------|-------------|
| RP11-69E11.4 | INHBB      | -0.362948454 | 4.92E-15    |
| RP11-69E11.4 | HPN        | -0.350077018 | 5.68E-14    |
| RP11-69E11.4 | MMP7       | -0.429544109 | 3.88E-21    |
| RP11-69E11.4 | RAB27A     | -0.59850759  | 0           |
| RP11-69E11.4 | IGF2BP2    | -0.447224247 | 0           |
| RP11-69E11.4 | ITGB4      | -0.49184167  | 0           |
| RP11-69E11.4 | PPP1R1B    | -0.390328693 | 0           |
| RP11-69E11.4 | NPDC1      | -0.108239461 | 0.023366166 |
| RP11-69E11.4 | CCL13      | -0.469389799 | 1.95E-25    |
| RP11-69E11.4 | SPINT1     | -0.647431897 | 0           |
| RP11-69E11.4 | HEY2       | -0.250245662 | 1.19E-07    |
| RP11-69E11.4 | CST2       | -0.504039405 | 1.15E-29    |
| RP11-69E11.4 | ADM        | -0.346678033 | 1.04E-13    |
| RP11-69E11.4 | VSTM2L     | -0.450689612 | 0           |
| RP11-69E11.4 | FAM84A     | -0.512047079 | 0           |
| RP11-69E11.4 | P4HA2      | -0.494716283 | 0           |
| RP11-69E11.4 | LPL        | -0.358515901 | 1.18E-14    |
| RP11-69E11.4 | TMEM173    | -0.355006    | 2.30E-14    |
| RP11-69E11.4 | DHRS3      | -0.384332387 | 0           |
| RP11-69E11.4 | SCN1B      | -0.400820102 | 0           |
| RP11-69E11.4 | GLT1D1     | -0.323023287 | 5.33E-12    |
| RP11-69E11.4 | PHYHIP     | -0.409801797 | 0           |
| RP11-69E11.4 | BHLHE40    | -0.596797034 | 0           |
| RP11-69E11.4 | BID        | -0.529730623 | 0           |
| RP11-69E11.4 | POSTN      | -0.316014972 | 1.59E-11    |
| RP11-69E11.4 | ITGA3      | -0.688741961 | 0           |
| RP11-69E11.4 | RSPO4      | -0.48418133  | 0           |
| RP11-69E11.4 | ADAMTS9    | -0.179564106 | 0.000159051 |
| RP11-69E11.4 | ABTB2      | -0.653711594 | 0           |
| RP11-69E11.4 | KCNQ3      | -0.695753964 | 0           |
| RP11-69E11.4 | ANXA1      | -0.47761498  | 0           |
| RP11-69E11.4 | S100A11    | -0.462329193 | 0           |
| RP11-69E11.4 | CEACAM6    | -0.586744696 | 5.83E-42    |
| RP11-69E11.4 | IER5L      | -0.370154915 | 1.05E-15    |
| RP11-69E11.4 | KRT80      | -0.648051867 | 0           |
| RP11-69E11.4 | CDH6       | -0.505766105 | 0           |
| RP11-69E11.4 | UNC5B      | -0.433042945 | 0           |
| RP11-69E11.4 | PLEKHN1    | -0.494186663 | 0           |
| RP11-69E11.4 | SYTL1      | -0.309729034 | 4.12E-11    |
| RP11-69E11.4 | TMEM163    | -0.474810293 | 0           |
| RP11-69E11.4 | C4orf48    | -0.07487185  | 0.117213068 |
| RP11-69E11.4 | B3GNT7     | -0.381245727 | 3.07E-17    |
| RP11-69E11.4 | BAIAP3     | -0.402083729 | 0           |
| RP11-69E11.4 | PHLDA2     | -0.391251202 | 0           |
| RP11-69E11.4 | GAP43      | -0.449747379 | 3.02E-23    |
| RP11-69E11.4 | S100A1     | -0.413138232 | 0           |
| RP11-69E11.4 | PTPRE      | -0.664853468 | 0           |
| RP11-69E11.4 | CCND1      | -0.527305775 | 0           |
| RP11-69E11.4 | ST6GALNAC5 | -0.621148357 | 3.38E-48    |
| RP11-69E11.4 | KRT17      | -0.250049076 | 1.22E-07    |
| RP11-69E11.4 | HPCAL4     | -0.329996426 | 1.75E-12    |

|              |         |              |             |
|--------------|---------|--------------|-------------|
| RP11-69E11.4 | GABBR2  | -0.283214001 | 1.81E-09    |
| RP11-69E11.4 | DIRAS3  | -0.291896703 | 5.47E-10    |
| RP11-69E11.4 | SERINC2 | -0.44093916  | 0           |
| RP11-69E11.4 | PTCHD4  | -0.458026563 | 0           |
| RP11-69E11.4 | EPS8    | -0.530169325 | 0           |
| RP11-69E11.4 | LY6E    | -0.453372887 | 0           |
| RP11-69E11.4 | UPP1    | -0.517422848 | 0           |
| RP11-69E11.4 | AHNAK2  | -0.61155845  | 0           |
| RP11-69E11.4 | PLXNC1  | -0.440784416 | 0           |
| RP11-69E11.4 | TNC     | -0.522959744 | 0           |
| RP11-69E11.4 | DUSP4   | -0.442071021 | 0           |
| RP11-69E11.4 | NRCAM   | -0.571014022 | 0           |
| RP11-69E11.4 | NRP2    | -0.439504761 | 0           |
| RP11-69E11.4 | CTSC    | -0.541825359 | 0           |
| RP11-69E11.4 | AMIGO2  | -0.351265471 | 4.58E-14    |
| RP11-69E11.4 | NAB2    | -0.364687519 | 3.45E-15    |
| RP11-69E11.4 | TBC1D2  | -0.679151786 | 0           |
| RP11-69E11.4 | PHLDA3  | -0.423382986 | 0           |
| RP11-69E11.4 | PTP4A3  | -0.287693643 | 9.80E-10    |
| RP11-69E11.4 | CRABP2  | -0.256249486 | 5.78E-08    |
| RP11-69E11.4 | GOS2    | -0.287645419 | 9.87E-10    |
| RP11-69E11.4 | S100A6  | -0.516775787 | 0           |
| RP11-69E11.4 | FOXQ1   | -0.546797034 | 0           |
| RP11-69E11.4 | LRG1    | -0.500883645 | 0           |
| RP11-69E11.4 | LAMP5   | -0.291268081 | 5.97E-10    |
| RP11-69E11.4 | ALDH3B1 | -0.60901687  | 0           |
| RP11-69E11.4 | CDH2    | -0.058806667 | 0.218720939 |
| RP11-69E11.4 | SCG5    | -0.159814846 | 0.000788658 |
| RP11-69E11.4 | ZCCHC16 | -0.295472308 | 2.71E-10    |
| RP11-69E11.4 | GRB7    | -0.534293523 | 0           |
| RP11-69E11.4 | TIAM1   | -0.404864021 | 0           |
| RP11-69E11.4 | FXYD5   | -0.216008022 | 5.22E-06    |
| RP11-69E11.4 | CLDN9   | -0.349517186 | 6.28E-14    |
| RP11-69E11.4 | FAM43A  | -0.479071789 | 0           |
| RP11-69E11.4 | CHST2   | -0.460436518 | 0           |
| RP11-69E11.4 | HMGA2   | -0.348505037 | 7.52E-14    |
| RP11-69E11.4 | GALNT7  | -0.564227115 | 0           |
| RP11-69E11.4 | CBLN1   | -0.443157777 | 0           |
| RP11-69E11.4 | STRA6   | -0.455441723 | 0           |
| RP11-69E11.4 | MUC21   | -0.574967536 | 5.42E-40    |
| RP11-69E11.4 | PRR36   | -0.37574968  | 2.53E-16    |
| RP11-69E11.4 | NFE2L3  | -0.524861496 | 0           |
| RP11-69E11.4 | NR1D1   | -0.408221164 | 0           |
| RP11-69E11.4 | MUC1    | -0.584776763 | 0           |
| RP11-69E11.4 | NAT8L   | -0.176428371 | 0.000207476 |
| RP11-69E11.4 | APOC1   | -0.112471739 | 0.018449359 |
| RP11-69E11.4 | EVA1A   | -0.576694883 | 0           |
| RP11-69E11.4 | ENTPD1  | -0.338498002 | 4.27E-13    |
| RP11-69E11.4 | COL1A1  | -0.330424774 | 1.63E-12    |
| RP11-69E11.4 | FNDC4   | -0.407132138 | 0           |
| RP11-69E11.4 | FRMD3   | -0.230448035 | 1.13E-06    |

|              |           |              |             |
|--------------|-----------|--------------|-------------|
| RP11-69E11.4 | SHROOM4   | -0.520251931 | 0           |
| RP11-69E11.4 | NELL2     | -0.295145057 | 3.46E-10    |
| RP11-69E11.4 | EPHB3     | -0.565082535 | 0           |
| RP11-69E11.4 | TMC6      | -0.485417725 | 0           |
| RP11-69E11.4 | NOD1      | -0.427190604 | 0           |
| RP11-69E11.4 | GGCT      | -0.483681071 | 0           |
| RP11-69E11.4 | ICAM1     | -0.604101788 | 0           |
| RP11-69E11.4 | PRSS23    | -0.501107039 | 0           |
| RP11-69E11.4 | CFI       | -0.482925504 | 0           |
| RP11-69E11.4 | CD55      | -0.638454883 | 0           |
| RP11-69E11.4 | RASD2     | -0.451681337 | 0           |
| RP11-69E11.4 | KLK11     | -0.391413698 | 1.60E-17    |
| RP11-69E11.4 | ICAM5     | -0.357249438 | 1.51E-14    |
| RP11-69E11.4 | ADORA1    | -0.464021593 | 0           |
| RP11-69E11.4 | ITGA2     | -0.621866038 | 0           |
| RP11-69E11.4 | ABCC3     | -0.411475475 | 0           |
| RP11-69E11.4 | MFGE8     | -0.477101814 | 0           |
| RP11-69E11.4 | STK32A    | -0.362356709 | 5.55E-15    |
| RP11-69E11.4 | CYSLTR2   | -0.368972702 | 1.37E-15    |
| RP11-69E11.4 | LAD1      | -0.577553848 | 0           |
| RP11-69E11.4 | MGAT3     | -0.577073588 | 0           |
| RP11-69E11.4 | IGFBP6    | -0.281408556 | 2.31E-09    |
| RP11-69E11.4 | CYP2S1    | -0.605309531 | 0           |
| RP11-69E11.4 | KCNJ2     | -0.401887427 | 0           |
| RP11-69E11.4 | FAM20A    | -0.38769648  | 0           |
| RP11-69E11.4 | TGFA      | -0.541601965 | 0           |
| RP11-69E11.4 | MXRA8     | -0.417329661 | 0           |
| RP11-69E11.4 | C8orf4    | -0.390374081 | 0           |
| RP11-69E11.4 | CLDN10    | -0.449953051 | 2.87E-23    |
| RP11-69E11.4 | PDE5A     | -0.610443184 | 0           |
| RP11-69E11.4 | APOE      | -0.107249863 | 0.024667387 |
| RP11-69E11.4 | SPOCK2    | -0.525819322 | 0           |
| RP11-69E11.4 | TENM1     | -0.096294363 | 0.043776486 |
| RP11-69E11.4 | SLIT1     | -0.164778578 | 0.000536    |
| RP11-69E11.4 | CXCL14    | -0.218650164 | 3.97E-06    |
| RP11-69E11.4 | ECM1      | -0.120429795 | 0.011599235 |
| RP11-69E11.4 | DUSP5     | -0.60791976  | 0           |
| RP11-69E11.4 | SEZ6L2    | -0.452206844 | 0           |
| RP11-69E11.4 | THRSP     | -0.246467121 | 1.86E-07    |
| RP11-69E11.4 | C19orf33  | -0.49074229  | 0           |
| RP11-69E11.4 | MPZL2     | -0.618379823 | 0           |
| RP11-69E11.4 | CTSH      | -0.481245443 | 0           |
| RP11-69E11.4 | CYP1B1    | -0.580874398 | 0           |
| RP11-69E11.4 | ALOX5     | -0.562498546 | 0           |
| RP11-69E11.4 | SYTL5     | -0.570916175 | 2.47E-39    |
| RP11-69E11.4 | TNFRSF12A | -0.409664215 | 0           |
| RP11-69E11.4 | DUSP6     | -0.483593841 | 0           |
| RP11-69E11.4 | ALOX15B   | -0.576477446 | 0           |
| RP11-69E11.4 | SDC4      | -0.551810835 | 0           |
| RP11-69E11.4 | MDK       | -0.388400985 | 0           |
| RP11-69E11.4 | KRT19     | -0.582745655 | 0           |

|              |          |              |             |
|--------------|----------|--------------|-------------|
| RP11-69E11.4 | MET      | -0.733127055 | 0           |
| RP11-69E11.4 | TESC     | -0.141442966 | 0.003000615 |
| RP11-69E11.4 | CXCL17   | -0.586911219 | 5.46E-42    |
| RP11-69E11.4 | NPC2     | -0.344777982 | 1.45E-13    |
| RP11-69E11.4 | COMP     | -0.316082912 | 1.57E-11    |
| RP11-69E11.4 | TUSC3    | -0.458226554 | 0           |
| RP11-69E11.4 | TMPRSS4  | -0.615889446 | 0           |
| RP11-69E11.4 | LGALS3   | -0.54427134  | 0           |
| RP11-69E11.4 | CRLF1    | -0.346148129 | 1.14E-13    |
| RP11-69E11.4 | CTXN1    | -0.405962549 | 0           |
| RP11-69E11.4 | PCSK1N   | -0.134936329 | 0.00465229  |
| RP11-69E11.4 | NMU      | -0.467663612 | 3.07E-25    |
| RP11-69E11.4 | GALE     | -0.40483537  | 0           |
| RP11-69E11.4 | PCSK2    | -0.179578574 | 0.000158854 |
| RP11-69E11.4 | GJB3     | -0.475459623 | 0           |
| RP11-69E11.4 | SLPI     | -0.493307557 | 0           |
| RP11-69E11.4 | AGR2     | -0.299739587 | 1.79E-10    |
| RP11-69E11.4 | MRC2     | -0.42431131  | 0           |
| RP11-69E11.4 | GOLT1A   | -0.37305676  | 5.21E-16    |
| RP11-69E11.4 | SLC27A6  | -0.543902016 | 3.64E-35    |
| RP11-69E11.4 | KCNN4    | -0.497936837 | 0           |
| RP11-69E11.4 | ETV4     | -0.315929952 | 1.25E-11    |
| RP11-69E11.4 | SYT12    | -0.538386092 | 0           |
| RP11-69E11.4 | PVRL4    | -0.611848507 | 0           |
| RP11-69E11.4 | PLCD3    | -0.564509513 | 0           |
| RP11-69E11.4 | PLAU     | -0.486619794 | 0           |
| RP11-69E11.4 | LRRK2    | -0.235323828 | 6.63E-07    |
| RP11-69E11.4 | SFN      | -0.517658865 | 0           |
| RP11-69E11.4 | LPAR5    | -0.544000715 | 0           |
| RP11-69E11.4 | NGEF     | -0.544279708 | 0           |
| RP11-69E11.4 | DTX4     | -0.585287093 | 0           |
| RP11-69E11.4 | CST6     | -0.430957372 | 0           |
| RP11-69E11.4 | QPCT     | -0.414969916 | 0           |
| RP11-69E11.4 | TIMP1    | -0.386823756 | 0           |
| RP11-69E11.4 | CAMK2N1  | -0.45306354  | 0           |
| RP11-69E11.4 | KLHDC8A  | -0.182411912 | 0.000124463 |
| RP11-69E11.4 | PDLIM4   | -0.52331845  | 0           |
| RP11-69E11.4 | SCEL     | -0.589504194 | 0           |
| RP11-69E11.4 | LCN2     | -0.639817371 | 0           |
| RP11-69E11.4 | PROS1    | -0.712388055 | 0           |
| RP11-69E11.4 | GABRB2   | -0.642445613 | 0           |
| RP11-69E11.4 | TMPRSS6  | -0.589991972 | 0           |
| RP11-69E11.4 | KLK7     | -0.497457281 | 8.00E-29    |
| RP11-69E11.4 | PDZK1IP1 | -0.461845528 | 0           |
| RP11-69E11.4 | CDH3     | -0.496410102 | 0           |
| RP11-69E11.4 | LRP4     | -0.335763665 | 6.75E-13    |
| RP11-69E11.4 | IGSF1    | -0.340415072 | 3.08E-13    |
| RP11-69E11.4 | B3GNT3   | -0.650678691 | 0           |
| RP11-69E11.4 | CLDN1    | -0.60465779  | 0           |
| RP11-69E11.4 | GDF15    | -0.631579754 | 0           |
| RP11-69E11.4 | ARHGAP36 | -0.294230608 | 3.24E-10    |

|              |           |              |          |
|--------------|-----------|--------------|----------|
| RP11-69E11.4 | LAMB3     | -0.561313355 | 0        |
| RP11-69E11.4 | KLK10     | -0.494732453 | 0        |
| RP11-69E11.4 | DPP4      | -0.666365452 | 0        |
| RP11-69E11.4 | METTL7B   | -0.42966481  | 0        |
| RP11-69E11.4 | LIPH      | -0.636059538 | 0        |
| RP11-69E11.4 | CLDN16    | -0.533231021 | 0        |
| RP11-69E11.4 | CHI3L1    | -0.521136569 | 0        |
| RP11-69E11.4 | SLC22A31  | -0.379947981 | 1.59E-16 |
| RP11-69E11.4 | TACSTD2   | -0.585818273 | 0        |
| RP11-69E11.4 | SFTPB     | -0.532936284 | 0        |
| RP11-69E11.4 | RXRG      | -0.278856055 | 3.25E-09 |
| RP11-69E11.4 | DCSTAMP   | -0.60326669  | 7.33E-45 |
| RP11-69E11.4 | CITED1    | -0.354556943 | 2.50E-14 |
| RP11-69E11.4 | SERPINA1  | -0.574784904 | 0        |
| RP11-69E11.4 | PRR15     | -0.30444319  | 9.04E-11 |
| RP11-69E11.4 | SLC34A2   | -0.714187543 | 0        |
| RP11-69E11.4 | FN1       | -0.710408434 | 0        |
| RP11-69E11.4 | ZCCHC12   | -0.280870852 | 2.48E-09 |
| AC007204.2   | TFF3      | 0.625791914  | 4.23E-49 |
| AC007204.2   | CCL21     | 0.465721679  | 5.12E-25 |
| AC007204.2   | TPO       | 0.629301113  | 8.60E-50 |
| AC007204.2   | MT1G      | 0.529564165  | 4.21E-33 |
| AC007204.2   | DIO1      | 0.524400857  | 2.21E-32 |
| AC007204.2   | DPT       | 0.407695689  | 5.21E-19 |
| AC007204.2   | CDH16     | 0.56009793   | 1.28E-37 |
| AC007204.2   | CRABP1    | 0.547480037  | 1.07E-35 |
| AC007204.2   | SLC26A7   | 0.706351593  | 1.44E-67 |
| AC007204.2   | MT1H      | 0.491335364  | 4.66E-28 |
| AC007204.2   | SLC26A4   | 0.724941088  | 9.33E-73 |
| AC007204.2   | SLC5A8    | 0.502774348  | 1.68E-29 |
| AC007204.2   | PKHD1L1   | 0.61320789   | 1.09E-46 |
| AC007204.2   | TFCP2L1   | 0.526008868  | 1.32E-32 |
| AC007204.2   | WSCD2     | 0.688420177  | 6.19E-63 |
| AC007204.2   | IPCEF1    | 0.618935351  | 8.98E-48 |
| AC007204.2   | SLC5A5    | 0.498183622  | 6.47E-29 |
| AC007204.2   | MT1F      | 0.524067681  | 2.45E-32 |
| AC007204.2   | FOSB      | 0.452087889  | 1.68E-23 |
| AC007204.2   | SEMA3D    | 0.674256789  | 1.66E-59 |
| AC007204.2   | BMP8A     | 0.679528862  | 9.26E-61 |
| AC007204.2   | MATN2     | 0.60952685   | 5.26E-46 |
| AC007204.2   | PLA2R1    | 0.571747888  | 1.81E-39 |
| AC007204.2   | COL23A1   | 0.615731812  | 3.65E-47 |
| AC007204.2   | HGD       | 0.616730063  | 2.36E-47 |
| AC007204.2   | TCEAL2    | 0.478550779  | 1.65E-26 |
| AC007204.2   | CHRD1     | 0.45983854   | 2.36E-24 |
| AC007204.2   | TNFRSF11B | 0.496640581  | 1.01E-28 |
| AC007204.2   | FAM167A   | 0.631344707  | 3.37E-50 |
| AC007204.2   | KIT       | 0.663746896  | 4.39E-57 |
| AC007204.2   | SLC4A4    | 0.660457687  | 2.40E-56 |
| AC007204.2   | SMOC2     | 0.516500088  | 2.63E-31 |
| AC007204.2   | FHL1      | 0.670404461  | 1.32E-58 |

|            |            |             |          |
|------------|------------|-------------|----------|
| AC007204.2 | OTOS       | 0.484299166 | 3.38E-27 |
| AC007204.2 | IGFBPL1    | 0.607949704 | 1.03E-45 |
| AC007204.2 | HBB        | 0.404091385 | 1.13E-18 |
| AC007204.2 | BEX1       | 0.532780186 | 1.48E-33 |
| AC007204.2 | FABP4      | 0.537208852 | 3.44E-34 |
| AC007204.2 | LMOD1      | 0.688307037 | 6.61E-63 |
| AC007204.2 | SOD3       | 0.433487189 | 1.54E-21 |
| AC007204.2 | TMEM171    | 0.44329397  | 1.48E-22 |
| AC007204.2 | PI16       | 0.47339116  | 6.69E-26 |
| AC007204.2 | ZMAT4      | 0.624996924 | 6.05E-49 |
| AC007204.2 | MFAP4      | 0.414917409 | 1.07E-19 |
| AC007204.2 | CWH43      | 0.536078705 | 5.00E-34 |
| AC007204.2 | SPX        | 0.705327101 | 2.71E-67 |
| AC007204.2 | APOD       | 0.281414788 | 1.96E-09 |
| AC007204.2 | DPP6       | 0.626386212 | 3.23E-49 |
| AC007204.2 | MMRN1      | 0.538917633 | 1.95E-34 |
| AC007204.2 | WDR72      | 0.545449246 | 2.15E-35 |
| AC007204.2 | MPPED2     | 0.717320447 | 1.40E-70 |
| AC007204.2 | PAPSS2     | 0.5372292   | 3.42E-34 |
| AC007204.2 | DCN        | 0.292508602 | 4.15E-10 |
| AC007204.2 | SORBS2     | 0.690836282 | 1.54E-63 |
| AC007204.2 | EGR2       | 0.509572607 | 2.20E-30 |
| AC007204.2 | EDN3       | 0.671067669 | 9.24E-59 |
| AC007204.2 | DIO2       | 0.649636201 | 5.55E-54 |
| AC007204.2 | ITPR1      | 0.730632314 | 1.97E-74 |
| AC007204.2 | CFD        | 0.238266429 | 4.40E-07 |
| AC007204.2 | CPXM1      | 0.490171376 | 6.49E-28 |
| AC007204.2 | ELMO1      | 0.709239544 | 2.40E-68 |
| AC007204.2 | GPC3       | 0.552717653 | 1.75E-36 |
| AC007204.2 | MYOC       | 0.458325141 | 3.47E-24 |
| AC007204.2 | DEPTOR     | 0.591135077 | 1.03E-42 |
| AC007204.2 | DGKI       | 0.580596415 | 6.36E-41 |
| AC007204.2 | CARTPT     | 0.657012083 | 1.39E-55 |
| AC007204.2 | IYD        | 0.551415069 | 2.75E-36 |
| AC007204.2 | LYVE1      | 0.534082963 | 9.66E-34 |
| AC007204.2 | CLCNKB     | 0.632993425 | 1.57E-50 |
| AC007204.2 | NCAM1      | 0.287624998 | 8.28E-10 |
| AC007204.2 | HBA2       | 0.324701439 | 3.09E-12 |
| AC007204.2 | GLT8D2     | 0.591387689 | 9.28E-43 |
| AC007204.2 | OGDHL      | 0.372813541 | 6.36E-16 |
| AC007204.2 | LIFR       | 0.571411024 | 2.05E-39 |
| AC007204.2 | CSGALNACT1 | 0.482350887 | 5.81E-27 |
| AC007204.2 | RAP1GAP    | 0.418393419 | 4.95E-20 |
| AC007204.2 | COL9A3     | 0.631561576 | 3.05E-50 |
| AC007204.2 | FBLN1      | 0.252641509 | 8.07E-08 |
| AC007204.2 | EFEMP1     | 0.469826927 | 1.73E-25 |
| AC007204.2 | AOX1       | 0.512134776 | 1.01E-30 |
| AC007204.2 | GRIN2C     | 0.604880824 | 3.74E-45 |
| AC007204.2 | C11orf74   | 0.54514699  | 2.38E-35 |
| AC007204.2 | PPARGC1A   | 0.491409617 | 4.56E-28 |
| AC007204.2 | ANGPTL1    | 0.691175699 | 1.26E-63 |

|            |          |             |          |
|------------|----------|-------------|----------|
| AC007204.2 | SCARA5   | 0.398823721 | 3.44E-18 |
| AC007204.2 | LTF      | 0.531069202 | 2.58E-33 |
| AC007204.2 | CA4      | 0.621274116 | 3.19E-48 |
| AC007204.2 | TG       | 0.6555677   | 2.89E-55 |
| AC007204.2 | FCGBP    | 0.559423493 | 1.63E-37 |
| AC007204.2 | PBX4     | 0.663021965 | 6.39E-57 |
| AC007204.2 | CYR61    | 0.438129528 | 5.13E-22 |
| AC007204.2 | FOS      | 0.445546631 | 8.51E-23 |
| AC007204.2 | KHDRBS2  | 0.724817122 | 1.01E-72 |
| AC007204.2 | MUM1L1   | 0.508194515 | 3.33E-30 |
| AC007204.2 | RGS16    | 0.638360127 | 1.28E-51 |
| AC007204.2 | MT1M     | 0.450273505 | 2.65E-23 |
| AC007204.2 | LRP2     | 0.576185555 | 3.42E-40 |
| AC007204.2 | MAFB     | 0.580353164 | 6.98E-41 |
| AC007204.2 | KCNK2    | 0.553829142 | 1.18E-36 |
| AC007204.2 | TBC1D4   | 0.692288981 | 6.62E-64 |
| AC007204.2 | MIOX     | 0.633689798 | 1.14E-50 |
| AC007204.2 | TPPP     | 0.566031557 | 1.50E-38 |
| AC007204.2 | FMOD     | 0.511076084 | 1.39E-30 |
| AC007204.2 | CITED2   | 0.423528784 | 1.55E-20 |
| AC007204.2 | RGS8     | 0.632568733 | 1.92E-50 |
| AC007204.2 | ABI3BP   | 0.413887528 | 1.35E-19 |
| AC007204.2 | ADH1B    | 0.43283276  | 1.80E-21 |
| AC007204.2 | OGN      | 0.350432203 | 3.95E-14 |
| AC007204.2 | NR4A1    | 0.430615549 | 3.03E-21 |
| AC007204.2 | FOXJ1    | 0.702049613 | 2.00E-66 |
| AC007204.2 | ALDH1A1  | 0.589545788 | 1.93E-42 |
| AC007204.2 | OCA2     | 0.53053726  | 3.07E-33 |
| AC007204.2 | TMEM139  | 0.338571294 | 3.10E-13 |
| AC007204.2 | ARHGAP24 | 0.680543425 | 5.27E-61 |
| AC007204.2 | SLC25A15 | 0.519045219 | 1.19E-31 |
| AC007204.2 | DES      | 0.318513793 | 8.30E-12 |
| AC007204.2 | GDF10    | 0.544139861 | 3.36E-35 |
| AC007204.2 | KIAA1324 | 0.64801429  | 1.23E-53 |
| AC007204.2 | JUN      | 0.46549961  | 5.43E-25 |
| AC007204.2 | C7       | 0.250266158 | 1.08E-07 |
| AC007204.2 | LGI3     | 0.584469995 | 1.42E-41 |
| AC007204.2 | CDON     | 0.700455553 | 5.25E-66 |
| AC007204.2 | BCL2     | 0.585713483 | 8.73E-42 |
| AC007204.2 | HLF      | 0.717408245 | 1.33E-70 |
| AC007204.2 | EGR1     | 0.499763983 | 4.08E-29 |
| AC007204.2 | IP6K3    | 0.51328591  | 7.09E-31 |
| AC007204.2 | SCUBE3   | 0.625681422 | 4.45E-49 |
| AC007204.2 | PKNOX2   | 0.692724989 | 5.14E-64 |
| AC007204.2 | SMAD9    | 0.482841503 | 5.07E-27 |
| AC007204.2 | IQGAP2   | 0.538647433 | 2.13E-34 |
| AC007204.2 | GNA14    | 0.666823917 | 8.78E-58 |
| AC007204.2 | LAYN     | 0.615109854 | 4.78E-47 |
| AC007204.2 | AVPR1A   | 0.695066583 | 1.30E-64 |
| AC007204.2 | PDLIM3   | 0.472720978 | 8.01E-26 |
| AC007204.2 | GPM6A    | 0.501925159 | 2.16E-29 |



|            |          |             |             |
|------------|----------|-------------|-------------|
| AC007204.2 | SDPR     | 0.650446802 | 3.72E-54    |
| AC007204.2 | CRYAB    | 0.100293235 | 0.03566867  |
| AC007204.2 | FOXA2    | 0.564755148 | 2.38E-38    |
| AC007204.2 | C8orf88  | 0.642906158 | 1.47E-52    |
| AC007204.2 | ISM1     | 0.563545147 | 3.70E-38    |
| AC007204.2 | BMP2     | 0.369831693 | 1.12E-15    |
| AC007204.2 | ID4      | 0.530565111 | 3.04E-33    |
| AC007204.2 | NUPR1    | 0.136405891 | 0.004192975 |
| AC007204.2 | SERTM1   | 0.371953124 | 7.50E-16    |
| AC007204.2 | IRS1     | 0.737981336 | 1.17E-76    |
| AC007204.2 | FIBIN    | 0.253803583 | 7.00E-08    |
| AC007204.2 | PODN     | 0.323375401 | 3.82E-12    |
| AC007204.2 | TDRD9    | 0.377951601 | 2.35E-16    |
| AC007204.2 | EPHA3    | 0.55827844  | 2.46E-37    |
| AC007204.2 | AIF1L    | 0.461471853 | 1.55E-24    |
| AC007204.2 | EBF4     | 0.613764952 | 8.55E-47    |
| AC007204.2 | ADM2     | 0.442552302 | 1.77E-22    |
| AC007204.2 | GSTM3    | 0.51049299  | 1.66E-30    |
| AC007204.2 | HSD17B6  | 0.595498563 | 1.78E-43    |
| AC007204.2 | AGR3     | 0.379248748 | 1.82E-16    |
| AC007204.2 | EPHB1    | 0.418982612 | 4.34E-20    |
| AC007204.2 | TMOD1    | 0.391016103 | 1.73E-17    |
| AC007204.2 | WASF3    | 0.66039925  | 2.47E-56    |
| AC007204.2 | SELV     | 0.597253664 | 8.71E-44    |
| AC007204.2 | ENPP1    | 0.356525358 | 1.33E-14    |
| AC007204.2 | SYNE1    | 0.732613312 | 5.04E-75    |
| AC007204.2 | PLCH1    | 0.595144537 | 2.05E-43    |
| AC007204.2 | CCDC146  | 0.69129002  | 1.18E-63    |
| AC007204.2 | SLC16A2  | 0.736727635 | 2.84E-76    |
| AC007204.2 | IER2     | 0.469992877 | 1.66E-25    |
| AC007204.2 | KCNAB1   | 0.70859234  | 3.59E-68    |
| AC007204.2 | SYNDIG1  | 0.46290824  | 1.07E-24    |
| AC007204.2 | C16orf89 | 0.65757399  | 1.05E-55    |
| AC007204.2 | CTGF     | 0.3935123   | 1.04E-17    |
| AC007204.2 | NR4A3    | 0.28571388  | 1.08E-09    |
| AC007204.2 | KIAA1456 | 0.572468848 | 1.38E-39    |
| AC007204.2 | AQP4     | 0.575695507 | 4.12E-40    |
| AC007204.2 | RNF150   | 0.664986413 | 2.30E-57    |
| AC007204.2 | C1S      | 0.175424796 | 0.000220962 |
| AC007204.2 | PFKFB2   | 0.477994776 | 1.92E-26    |
| AC007204.2 | PROX1    | 0.656977564 | 1.42E-55    |
| AC007204.2 | TCF7L1   | 0.675427775 | 8.78E-60    |
| AC007204.2 | HSPB6    | 0.451781946 | 1.82E-23    |
| AC007204.2 | FHDC1    | 0.641582957 | 2.76E-52    |
| AC007204.2 | PRR15L   | 0.407686396 | 5.22E-19    |
| AC007204.2 | SLC1A1   | 0.382869246 | 8.93E-17    |
| AC007204.2 | BTBD11   | 0.694061523 | 2.35E-64    |
| AC007204.2 | TRIM58   | 0.59301811  | 4.83E-43    |
| AC007204.2 | LRIG1    | 0.539170245 | 1.79E-34    |
| AC007204.2 | ROR2     | 0.364468962 | 3.08E-15    |
| AC007204.2 | GPR125   | 0.632065808 | 2.42E-50    |

|            |          |             |             |
|------------|----------|-------------|-------------|
| AC007204.2 | FLRT1    | 0.665400579 | 1.85E-57    |
| AC007204.2 | PGF      | 0.485391597 | 2.50E-27    |
| AC007204.2 | DUSP1    | 0.398732768 | 3.51E-18    |
| AC007204.2 | PLA2G7   | 0.437364315 | 6.16E-22    |
| AC007204.2 | PLSCR4   | 0.598639127 | 4.95E-44    |
| AC007204.2 | FAM46B   | 0.315975885 | 1.24E-11    |
| AC007204.2 | GLDC     | 0.468471954 | 2.48E-25    |
| AC007204.2 | ZBTB16   | 0.48310376  | 4.72E-27    |
| AC007204.2 | OMD      | 0.287715684 | 8.18E-10    |
| AC007204.2 | HSD11B2  | 0.62377456  | 1.05E-48    |
| AC007204.2 | FGL2     | 0.290426287 | 5.58E-10    |
| AC007204.2 | CLCNKA   | 0.623915285 | 9.84E-49    |
| AC007204.2 | GATM     | 0.534859381 | 7.48E-34    |
| AC007204.2 | TNS3     | 0.491701235 | 4.20E-28    |
| AC007204.2 | TOB1     | 0.41265255  | 1.77E-19    |
| AC007204.2 | MARC2    | 0.5882884   | 3.17E-42    |
| AC007204.2 | LRRC2    | 0.540406075 | 1.18E-34    |
| AC007204.2 | SORD     | 0.453246417 | 1.26E-23    |
| AC007204.2 | RIMS4    | 0.520811662 | 6.86E-32    |
| AC007204.2 | SLC29A4  | 0.590079523 | 1.56E-42    |
| AC007204.2 | SLC39A14 | 0.569847976 | 3.67E-39    |
| AC007204.2 | FAXDC2   | 0.672973278 | 3.32E-59    |
| AC007204.2 | HSPB8    | 0.217594052 | 4.20E-06    |
| AC007204.2 | CCL19    | 0.061179792 | 0.200755177 |
| AC007204.2 | KCNIP3   | 0.602635112 | 9.53E-45    |
| AC007204.2 | CGNL1    | 0.606871654 | 1.62E-45    |
| AC007204.2 | ATF3     | 0.183078485 | 0.000114489 |
| AC007204.2 | SGCD     | 0.314663322 | 1.52E-11    |
| AC007204.2 | STARD13  | 0.646334794 | 2.79E-53    |
| AC007204.2 | LDHD     | 0.59701211  | 9.61E-44    |
| AC007204.2 | RCAN1    | 0.391891949 | 1.45E-17    |
| AC007204.2 | ID3      | 0.268466309 | 1.10E-08    |
| AC007204.2 | SYTL3    | 0.583376145 | 2.17E-41    |
| AC007204.2 | MT1E     | 0.365703657 | 2.45E-15    |
| AC007204.2 | CAMK1D   | 0.687034614 | 1.37E-62    |
| AC007204.2 | PRKCQ    | 0.637602999 | 1.83E-51    |
| AC007204.2 | NUAK2    | 0.341407192 | 1.91E-13    |
| AC007204.2 | LIPG     | 0.702627935 | 1.41E-66    |
| AC007204.2 | SLC25A25 | 0.375715534 | 3.63E-16    |
| AC007204.2 | PRKX     | 0.325081847 | 2.90E-12    |
| AC007204.2 | SRPX     | 0.385806132 | 4.97E-17    |
| AC007204.2 | FAM189A1 | 0.589057868 | 2.34E-42    |
| AC007204.2 | PLEKHH1  | 0.694086912 | 2.32E-64    |
| AC007204.2 | WNT11    | 0.492757924 | 3.10E-28    |
| AC007204.2 | SNAI1    | 0.37800323  | 2.33E-16    |
| AC007204.2 | FDCSP    | 0.122399742 | 0.010261046 |
| AC007204.2 | MT1X     | 0.33272348  | 8.28E-13    |
| AC007204.2 | ACACB    | 0.672501811 | 4.28E-59    |
| AC007204.2 | ARC      | 0.334556586 | 6.10E-13    |
| AC007204.2 | KLK4     | 0.156290304 | 0.001017938 |
| AC007204.2 | ZFPM2    | 0.497845206 | 7.14E-29    |

|            |          |             |          |
|------------|----------|-------------|----------|
| AC007204.2 | AKAP12   | 0.460493742 | 1.99E-24 |
| AC007204.2 | GJB6     | 0.377582452 | 2.53E-16 |
| AC007204.2 | ERO1LB   | 0.658285305 | 7.29E-56 |
| AC007204.2 | DNALI1   | 0.616196329 | 2.98E-47 |
| AC007204.2 | HKDC1    | 0.312795607 | 2.03E-11 |
| AC007204.2 | ZFP36L2  | 0.541208024 | 9.05E-35 |
| AC007204.2 | CAPSL    | 0.627283333 | 2.16E-49 |
| AC007204.2 | CYP7B1   | 0.609009569 | 6.55E-46 |
| AC007204.2 | CPQ      | 0.672876971 | 3.50E-59 |
| AC007204.2 | RPS6KA6  | 0.691200687 | 1.25E-63 |
| AC007204.2 | TLE1     | 0.458143779 | 3.64E-24 |
| AC007204.2 | TP53INP2 | 0.662244696 | 9.56E-57 |
| AC007204.2 | KATNAL2  | 0.616738857 | 2.35E-47 |
| AC007204.2 | SGPP2    | 0.303228106 | 8.66E-11 |
| AC007204.2 | CTH      | 0.540403947 | 1.19E-34 |
| AC007204.2 | KIF12    | 0.387317835 | 3.67E-17 |
| AC007204.2 | TMEM220  | 0.65709075  | 1.34E-55 |
| AC007204.2 | CENPJ    | 0.600637474 | 2.18E-44 |
| AC007204.2 | FAM155B  | 0.625637311 | 4.54E-49 |
| AC007204.2 | WFS1     | 0.440124896 | 3.18E-22 |
| AC007204.2 | SELENBP1 | 0.648866166 | 8.10E-54 |
| AC007204.2 | SNTA1    | 0.343533618 | 1.32E-13 |
| AC007204.2 | FRAS1    | 0.276297436 | 3.92E-09 |
| AC007204.2 | FBLN7    | 0.54620297  | 1.66E-35 |
| AC007204.2 | AGPAT9   | 0.560860306 | 9.75E-38 |
| AC007204.2 | GPR83    | 0.626969022 | 2.48E-49 |
| AC007204.2 | PRTG     | 0.598409066 | 5.44E-44 |
| AC007204.2 | EGR3     | 0.358259604 | 9.67E-15 |
| AC007204.2 | GRAMD2   | 0.338376835 | 3.20E-13 |
| AC007204.2 | HYOU1    | 0.545670087 | 1.99E-35 |
| AC007204.2 | FBLN5    | 0.428546708 | 4.90E-21 |
| AC007204.2 | ITM2A    | 0.620043527 | 5.51E-48 |
| AC007204.2 | SRF      | 0.521874875 | 4.91E-32 |
| AC007204.2 | FGFR2    | 0.552091066 | 2.18E-36 |
| AC007204.2 | MT1A     | 0.22491904  | 1.93E-06 |
| AC007204.2 | MAMDC2   | 0.450579448 | 2.45E-23 |
| AC007204.2 | FHL2     | 0.322034187 | 4.74E-12 |
| AC007204.2 | FTCDNL1  | 0.407494916 | 5.44E-19 |
| AC007204.2 | PKIA     | 0.538198801 | 2.48E-34 |
| AC007204.2 | DNAJB4   | 0.609229134 | 5.97E-46 |
| AC007204.2 | SLC25A33 | 0.502389393 | 1.88E-29 |
| AC007204.2 | EYA2     | 0.298799233 | 1.67E-10 |
| AC007204.2 | LPAR1    | 0.219740477 | 3.35E-06 |
| AC007204.2 | STX11    | 0.289055286 | 6.77E-10 |
| AC007204.2 | ARHGEF28 | 0.464540789 | 6.97E-25 |
| AC007204.2 | OR2W3    | 0.557521454 | 3.22E-37 |
| AC007204.2 | ALDH1B1  | 0.379616218 | 1.70E-16 |
| AC007204.2 | CXCL12   | 0.355558736 | 1.58E-14 |
| AC007204.2 | OLFM2    | 0.582302152 | 3.29E-41 |
| AC007204.2 | TUB      | 0.503377716 | 1.41E-29 |
| AC007204.2 | HTRA3    | 0.344617682 | 1.10E-13 |

|            |          |             |             |
|------------|----------|-------------|-------------|
| AC007204.2 | CKB      | 0.350836259 | 3.68E-14    |
| AC007204.2 | RGS2     | 0.134996453 | 0.004605482 |
| AC007204.2 | SHANK2   | 0.774104346 | 8.37E-89    |
| AC007204.2 | CNTFR    | 0.644846354 | 5.75E-53    |
| AC007204.2 | CYTH3    | 0.688097118 | 7.45E-63    |
| AC007204.2 | PLAC9    | 0.40689778  | 6.18E-19    |
| AC007204.2 | WVOX     | 0.625850209 | 4.12E-49    |
| AC007204.2 | NPR3     | 0.51729069  | 2.06E-31    |
| AC007204.2 | SDC2     | 0.589007232 | 2.39E-42    |
| AC007204.2 | KLF15    | 0.586051766 | 7.65E-42    |
| AC007204.2 | TMEM164  | 0.585881277 | 8.18E-42    |
| AC007204.2 | LONRF3   | 0.501883175 | 2.19E-29    |
| AC007204.2 | GBP1     | 0.274088461 | 5.26E-09    |
| AC007204.2 | ARHGAP6  | 0.491149771 | 4.91E-28    |
| AC007204.2 | TMEM119  | 0.242568642 | 2.68E-07    |
| AC007204.2 | SH3RF1   | 0.570523973 | 2.86E-39    |
| AC007204.2 | CRELD2   | 0.427442788 | 6.32E-21    |
| AC007204.2 | PCP4     | 0.005780584 | 0.903871334 |
| AC007204.2 | GCSH     | 0.604283547 | 4.80E-45    |
| AC007204.2 | IMPA2    | 0.539894467 | 1.41E-34    |
| AC007204.2 | C1R      | 0.123082394 | 0.009841998 |
| AC007204.2 | SUCNR1   | 0.53368213  | 1.10E-33    |
| AC007204.2 | SFRP1    | 0.558282837 | 2.45E-37    |
| AC007204.2 | UGT8     | 0.417769618 | 5.69E-20    |
| AC007204.2 | TLE4     | 0.447855319 | 4.82E-23    |
| AC007204.2 | ANTXR1   | 0.518324826 | 1.49E-31    |
| AC007204.2 | GPX3     | 0.303395332 | 8.45E-11    |
| AC007204.2 | DPY19L2  | 0.572810392 | 1.22E-39    |
| AC007204.2 | FAM46C   | 0.451231617 | 2.09E-23    |
| AC007204.2 | IL33     | 0.387190337 | 3.76E-17    |
| AC007204.2 | PEG3     | 0.642895236 | 1.47E-52    |
| AC007204.2 | FAHD2A   | 0.480073546 | 1.09E-26    |
| AC007204.2 | PTGDS    | 0.126692298 | 0.007868827 |
| AC007204.2 | CHCHD10  | 0.159357596 | 0.000805697 |
| AC007204.2 | CD36     | 0.578797775 | 1.27E-40    |
| AC007204.2 | ANKRD37  | 0.512891177 | 8.00E-31    |
| AC007204.2 | TSPAN33  | 0.433921495 | 1.39E-21    |
| AC007204.2 | PRDM16   | 0.668666669 | 3.32E-58    |
| AC007204.2 | UST      | 0.729094513 | 5.65E-74    |
| AC007204.2 | NEXN     | 0.600915192 | 1.94E-44    |
| AC007204.2 | NUPR1L   | 0.167896906 | 0.00041101  |
| AC007204.2 | SLC24A3  | 0.51521575  | 3.92E-31    |
| AC007204.2 | MARC1    | 0.664911807 | 2.39E-57    |
| AC007204.2 | MYH11    | 0.452033849 | 1.71E-23    |
| AC007204.2 | APOA1    | 0.491198439 | 4.85E-28    |
| AC007204.2 | TMEM178B | 0.495058243 | 1.60E-28    |
| AC007204.2 | CAPN6    | 0.39444048  | 8.57E-18    |
| AC007204.2 | PPM1L    | 0.635074605 | 5.98E-51    |
| AC007204.2 | FZD8     | 0.608063939 | 9.79E-46    |
| AC007204.2 | RCAN2    | 0.64322359  | 1.26E-52    |
| AC007204.2 | COPZ2    | 0.418916799 | 4.40E-20    |

|            |          |             |             |
|------------|----------|-------------|-------------|
| AC007204.2 | GAS1     | 0.346255194 | 8.24E-14    |
| AC007204.2 | DACT1    | 0.563520325 | 3.73E-38    |
| AC007204.2 | WBSCR17  | 0.682602478 | 1.67E-61    |
| AC007204.2 | NCS1     | 0.349367675 | 4.77E-14    |
| AC007204.2 | SPIRE2   | 0.476747316 | 2.70E-26    |
| AC007204.2 | C15orf52 | 0.323244627 | 3.90E-12    |
| AC007204.2 | SPAG5    | 0.513880918 | 5.90E-31    |
| AC007204.2 | ARL4D    | 0.367467547 | 1.76E-15    |
| AC007204.2 | FAM189A2 | 0.639813109 | 6.43E-52    |
| AC007204.2 | MAP1LC3A | 0.485089342 | 2.72E-27    |
| AC007204.2 | KLF6     | 0.197605756 | 3.05E-05    |
| AC007204.2 | ADD3     | 0.54068748  | 1.08E-34    |
| AC007204.2 | TSPAN7   | 0.538634526 | 2.14E-34    |
| AC007204.2 | KLF9     | 0.579778439 | 8.70E-41    |
| AC007204.2 | KCNQ1    | 0.552921099 | 1.63E-36    |
| AC007204.2 | MAN1A1   | 0.327830656 | 1.86E-12    |
| AC007204.2 | MLF1     | 0.380279295 | 1.49E-16    |
| AC007204.2 | RARB     | 0.7227497   | 4.01E-72    |
| AC007204.2 | CDC42EP2 | 0.509616293 | 2.17E-30    |
| AC007204.2 | FAM3B    | 0.248096329 | 1.39E-07    |
| AC007204.2 | GADD45B  | 0.23111215  | 9.83E-07    |
| AC007204.2 | TMEM47   | 0.630320073 | 5.39E-50    |
| AC007204.2 | SDF2L1   | 0.325018446 | 2.93E-12    |
| AC007204.2 | CCDC85A  | 0.446366735 | 6.96E-23    |
| AC007204.2 | CRYBG3   | 0.283596673 | 1.45E-09    |
| AC007204.2 | FBLN2    | 0.221228635 | 2.87E-06    |
| AC007204.2 | PEBP4    | 0.268161784 | 1.15E-08    |
| AC007204.2 | CDADC1   | 0.657126209 | 1.31E-55    |
| AC007204.2 | FAM63A   | 0.672906047 | 3.44E-59    |
| AC007204.2 | GLUL     | 0.511059489 | 1.40E-30    |
| AC007204.2 | FREM2    | 0.469236884 | 2.03E-25    |
| AC007204.2 | ACKR3    | 0.584562189 | 1.37E-41    |
| AC007204.2 | DENND6A  | 0.637873199 | 1.61E-51    |
| AC007204.2 | CLDN8    | 0.13808014  | 0.003746548 |
| AC007204.2 | UTS2R    | 0.242978626 | 2.55E-07    |
| AC007204.2 | SCNN1B   | 0.449745444 | 3.02E-23    |
| AC007204.2 | TTC30A   | 0.597340322 | 8.41E-44    |
| AC007204.2 | CORO2B   | 0.690503815 | 1.87E-63    |
| AC007204.2 | TC2N     | 0.244364019 | 2.17E-07    |
| AC007204.2 | ALDH2    | 0.515998125 | 3.08E-31    |
| AC007204.2 | GPR183   | 0.122862404 | 0.009975349 |
| AC007204.2 | C4orf47  | 0.519864897 | 9.23E-32    |
| AC007204.2 | SLC25A42 | 0.670760756 | 1.09E-58    |
| AC007204.2 | LGMN     | 0.491865341 | 4.01E-28    |
| AC007204.2 | ACSF2    | 0.453162591 | 1.29E-23    |
| AC007204.2 | KIAA1467 | 0.55601514  | 5.48E-37    |
| AC007204.2 | PRKG1    | 0.700452858 | 5.26E-66    |
| AC007204.2 | GNAI1    | 0.600311674 | 2.49E-44    |
| AC007204.2 | ABCC4    | 0.415870557 | 8.68E-20    |
| AC007204.2 | PRPS1    | 0.544415677 | 3.06E-35    |
| AC007204.2 | TSPAN5   | 0.296194956 | 2.44E-10    |

|            |          |              |             |
|------------|----------|--------------|-------------|
| AC007204.2 | CR2      | 0.268329758  | 1.12E-08    |
| AC007204.2 | CCDC170  | 0.492487723  | 3.35E-28    |
| AC007204.2 | RRAD     | -0.006610758 | 0.890147663 |
| AC007204.2 | SCGB2A1  | 0.395709503  | 6.59E-18    |
| AC007204.2 | SESN3    | 0.397631684  | 4.42E-18    |
| AC007204.2 | SGK223   | 0.321333084  | 5.30E-12    |
| AC007204.2 | NDRG2    | 0.66090646   | 1.91E-56    |
| AC007204.2 | C3orf52  | 0.25414612   | 6.71E-08    |
| AC007204.2 | FLRT3    | -0.105848581 | 0.026576371 |
| AC007204.2 | MST1R    | -0.499114225 | 4.93E-29    |
| AC007204.2 | SDC1     | -0.475760412 | 3.53E-26    |
| AC007204.2 | ST8SIA4  | -0.462234938 | 1.27E-24    |
| AC007204.2 | UBTD1    | -0.355983964 | 1.46E-14    |
| AC007204.2 | EPHA2    | -0.327862286 | 1.85E-12    |
| AC007204.2 | TMEM130  | -0.028807462 | 0.547182509 |
| AC007204.2 | SPINK2   | -0.493852341 | 2.27E-28    |
| AC007204.2 | MMP16    | -0.428536638 | 4.91E-21    |
| AC007204.2 | SIGLEC15 | -0.461154704 | 1.68E-24    |
| AC007204.2 | RIN1     | -0.432136755 | 2.12E-21    |
| AC007204.2 | IL1RN    | -0.548675196 | 7.11E-36    |
| AC007204.2 | FCER1G   | -0.264558688 | 1.82E-08    |
| AC007204.2 | CD276    | -0.443964577 | 1.25E-22    |
| AC007204.2 | CTSB     | -0.403701332 | 1.23E-18    |
| AC007204.2 | FAM171A2 | 0.019537536  | 0.683105787 |
| AC007204.2 | ASPHD1   | -0.51029229  | 1.77E-30    |
| AC007204.2 | C15orf48 | -0.408833577 | 4.07E-19    |
| AC007204.2 | DYSF     | -0.006978117 | 0.884085032 |
| AC007204.2 | PDZRN4   | 0.071084656  | 0.137008431 |
| AC007204.2 | EFHD2    | -0.115931802 | 0.015085693 |
| AC007204.2 | ASF1B    | -0.412718646 | 1.74E-19    |
| AC007204.2 | AQP1     | -0.014902431 | 0.755521128 |
| AC007204.2 | ARRDC2   | -0.376084312 | 3.38E-16    |
| AC007204.2 | PRSS1    | -0.248575443 | 1.32E-07    |
| AC007204.2 | MAPK13   | -0.336556636 | 4.36E-13    |
| AC007204.2 | CST5     | -0.561846634 | 6.84E-38    |
| AC007204.2 | AHR      | -0.346854741 | 7.42E-14    |
| AC007204.2 | BAX      | -0.561345958 | 8.19E-38    |
| AC007204.2 | C1orf115 | -0.090056829 | 0.059382221 |
| AC007204.2 | PLK3     | -0.410074087 | 3.11E-19    |
| AC007204.2 | JAG2     | -0.181626353 | 0.000129969 |
| AC007204.2 | RAD23B   | -0.306555328 | 5.26E-11    |
| AC007204.2 | CA12     | 0.242559706  | 2.68E-07    |
| AC007204.2 | ADTRP    | -0.181632878 | 0.000129895 |
| AC007204.2 | UCP2     | -0.299093971 | 1.60E-10    |
| AC007204.2 | IGFBP2   | -0.360322204 | 6.63E-15    |
| AC007204.2 | LOXL2    | -0.153406807 | 0.001263384 |
| AC007204.2 | GPX1     | -0.522979505 | 3.46E-32    |
| AC007204.2 | P3H3     | -0.431335232 | 2.56E-21    |
| AC007204.2 | C2orf81  | -0.236915002 | 5.13E-07    |
| AC007204.2 | CDT1     | -0.52525174  | 1.68E-32    |
| AC007204.2 | SNX25    | 0.013068616  | 0.784815643 |

|            |          |              |             |
|------------|----------|--------------|-------------|
| AC007204.2 | MTHFD1L  | -0.499598033 | 4.28E-29    |
| AC007204.2 | CDC42BPG | -0.472915666 | 7.60E-26    |
| AC007204.2 | MSN      | -0.38748804  | 3.54E-17    |
| AC007204.2 | SIGLEC6  | -0.267659539 | 1.22E-08    |
| AC007204.2 | F2R      | -0.075123051 | 0.116011639 |
| AC007204.2 | TMEM184A | -0.523935773 | 2.56E-32    |
| AC007204.2 | CKS2     | -0.39346521  | 1.05E-17    |
| AC007204.2 | TAX1BP3  | -0.598516437 | 5.20E-44    |
| AC007204.2 | PMEPA1   | -0.354337799 | 1.97E-14    |
| AC007204.2 | CXCL16   | -0.531921928 | 1.96E-33    |
| AC007204.2 | FAXC     | -0.548716187 | 7.01E-36    |
| AC007204.2 | VTCN1    | -0.562881281 | 4.71E-38    |
| AC007204.2 | SH2D4A   | -0.254077755 | 6.77E-08    |
| AC007204.2 | RNF24    | -0.294231501 | 3.24E-10    |
| AC007204.2 | LY6G6C   | -0.520055569 | 8.70E-32    |
| AC007204.2 | NID1     | -0.141794152 | 0.002906052 |
| AC007204.2 | STAC     | -0.556118682 | 5.29E-37    |
| AC007204.2 | RAB34    | -0.428619045 | 4.82E-21    |
| AC007204.2 | HES4     | -0.351376518 | 3.34E-14    |
| AC007204.2 | EPHA10   | -0.516611856 | 2.54E-31    |
| AC007204.2 | ENTPD2   | -0.305451407 | 6.21E-11    |
| AC007204.2 | DDB2     | -0.525001964 | 1.82E-32    |
| AC007204.2 | NKAIN4   | -0.25958828  | 3.42E-08    |
| AC007204.2 | TRIM29   | -0.466470061 | 4.21E-25    |
| AC007204.2 | ADCY8    | -0.461404628 | 1.57E-24    |
| AC007204.2 | SFTA2    | -0.460299424 | 2.09E-24    |
| AC007204.2 | NRIP1    | -0.244493092 | 2.14E-07    |
| AC007204.2 | VWA1     | -0.028772854 | 0.547664219 |
| AC007204.2 | APLNR    | 0.006021991  | 0.899877476 |
| AC007204.2 | REN      | -0.31903285  | 7.64E-12    |
| AC007204.2 | EDIL3    | -0.035193266 | 0.462031189 |
| AC007204.2 | AGRN     | -0.326341789 | 2.37E-12    |
| AC007204.2 | TREM1    | -0.350711868 | 3.76E-14    |
| AC007204.2 | SRL      | -0.244230976 | 2.20E-07    |
| AC007204.2 | RASGRF1  | -0.290368843 | 5.62E-10    |
| AC007204.2 | RMI2     | -0.421317114 | 2.56E-20    |
| AC007204.2 | SAMD1    | -0.480897195 | 8.68E-27    |
| AC007204.2 | MGAT4B   | -0.568498109 | 6.05E-39    |
| AC007204.2 | NXN      | -0.473038268 | 7.36E-26    |
| AC007204.2 | SH3BGRL3 | -0.532309428 | 1.73E-33    |
| AC007204.2 | CA11     | -0.163470455 | 0.000584993 |
| AC007204.2 | PLD3     | -0.135613304 | 0.004420636 |
| AC007204.2 | LURAP1L  | -0.453632499 | 1.14E-23    |
| AC007204.2 | CARNS1   | -0.181593872 | 0.000130337 |
| AC007204.2 | PDLIM7   | -0.322450621 | 4.43E-12    |
| AC007204.2 | BCL2L1   | -0.621888548 | 2.43E-48    |
| AC007204.2 | GGT6     | -0.249826887 | 1.13E-07    |
| AC007204.2 | DPYSL3   | -0.128853049 | 0.006864405 |
| AC007204.2 | FYN      | -0.337876433 | 3.49E-13    |
| AC007204.2 | TK1      | -0.442063814 | 1.99E-22    |
| AC007204.2 | AK1      | -0.200235138 | 2.38E-05    |

|            |          |              |             |
|------------|----------|--------------|-------------|
| AC007204.2 | HIGD1B   | 0.041790692  | 0.38239202  |
| AC007204.2 | TMEM59L  | -0.373233238 | 5.87E-16    |
| AC007204.2 | MEGF9    | -0.27238244  | 6.60E-09    |
| AC007204.2 | ZFP36L1  | -0.310475005 | 2.90E-11    |
| AC007204.2 | ADRA1B   | -0.16192542  | 0.000660329 |
| AC007204.2 | EPAH4    | -0.334150648 | 6.53E-13    |
| AC007204.2 | TCERG1L  | 0.024795875  | 0.604367782 |
| AC007204.2 | NGFR     | -0.099281508 | 0.037581739 |
| AC007204.2 | EBI3     | -0.482254012 | 5.97E-27    |
| AC007204.2 | S100A10  | -0.523865421 | 2.61E-32    |
| AC007204.2 | S100B    | -0.298916532 | 1.64E-10    |
| AC007204.2 | CD44     | 0.068057704  | 0.154576018 |
| AC007204.2 | BHLHE41  | -0.281874484 | 1.84E-09    |
| AC007204.2 | FBXO2    | -0.360938062 | 5.92E-15    |
| AC007204.2 | SLC30A2  | -0.553611705 | 1.28E-36    |
| AC007204.2 | FRMD5    | -0.570894027 | 2.49E-39    |
| AC007204.2 | SAMD11   | -0.315729939 | 1.28E-11    |
| AC007204.2 | SIPA1L2  | -0.193394745 | 4.52E-05    |
| AC007204.2 | S100A16  | -0.643705837 | 9.98E-53    |
| AC007204.2 | PPL      | -0.532797774 | 1.47E-33    |
| AC007204.2 | ARHGDIB  | -0.116022153 | 0.015006496 |
| AC007204.2 | CDC42EP3 | -0.504384904 | 1.04E-29    |
| AC007204.2 | RUNX2    | -0.209096998 | 9.98E-06    |
| AC007204.2 | LAMC2    | -0.525835117 | 1.40E-32    |
| AC007204.2 | BRINP1   | -0.393617543 | 1.02E-17    |
| AC007204.2 | GPRC5B   | -0.265438222 | 1.63E-08    |
| AC007204.2 | AQP5     | 0.030676028  | 0.521488547 |
| AC007204.2 | PLAG1    | -0.109382885 | 0.021895643 |
| AC007204.2 | PTPRU    | -0.525536124 | 1.54E-32    |
| AC007204.2 | ANGPTL4  | -0.512209506 | 9.85E-31    |
| AC007204.2 | PALM3    | -0.29740256  | 2.04E-10    |
| AC007204.2 | ACP5     | -0.368833867 | 1.36E-15    |
| AC007204.2 | DLG4     | -0.067520566 | 0.157864128 |
| AC007204.2 | ETNK2    | -0.274075128 | 5.27E-09    |
| AC007204.2 | CD109    | -0.311760477 | 2.38E-11    |
| AC007204.2 | SNX22    | -0.204181055 | 1.62E-05    |
| AC007204.2 | TMEM98   | -0.429990613 | 3.50E-21    |
| AC007204.2 | CTHRC1   | -0.321212523 | 5.41E-12    |
| AC007204.2 | S100A2   | -0.496914469 | 9.36E-29    |
| AC007204.2 | C11orf80 | -0.560774211 | 1.01E-37    |
| AC007204.2 | SREBF1   | -0.410531371 | 2.81E-19    |
| AC007204.2 | PRSS22   | -0.528009627 | 6.95E-33    |
| AC007204.2 | CMTM3    | -0.486834226 | 1.67E-27    |
| AC007204.2 | RDH5     | -0.281498473 | 1.94E-09    |
| AC007204.2 | MYH10    | -0.31144418  | 2.50E-11    |
| AC007204.2 | EVPL     | -0.426714311 | 7.48E-21    |
| AC007204.2 | SCD      | -0.396580527 | 5.50E-18    |
| AC007204.2 | CD151    | -0.407881139 | 5.00E-19    |
| AC007204.2 | S100A4   | -0.441839285 | 2.10E-22    |
| AC007204.2 | BNIP1    | -0.176696794 | 0.000198457 |
| AC007204.2 | MAP3K6   | -0.517708117 | 1.81E-31    |



|            |          |              |             |
|------------|----------|--------------|-------------|
| AC007204.2 | MANEAL   | -0.434523028 | 1.21E-21    |
| AC007204.2 | CD207    | -0.273232807 | 5.90E-09    |
| AC007204.2 | CD1A     | -0.302510044 | 9.64E-11    |
| AC007204.2 | C3       | -0.303051377 | 8.89E-11    |
| AC007204.2 | NT5E     | -0.309674049 | 3.27E-11    |
| AC007204.2 | CACNG4   | -0.470021152 | 1.65E-25    |
| AC007204.2 | FHOD1    | -0.329900064 | 1.32E-12    |
| AC007204.2 | LEMD1    | -0.50770631  | 3.86E-30    |
| AC007204.2 | ATP11A   | 0.033475899  | 0.484180701 |
| AC007204.2 | PPAP2C   | -0.281773495 | 1.86E-09    |
| AC007204.2 | DRAM1    | -0.434254246 | 1.29E-21    |
| AC007204.2 | CDA      | -0.190030929 | 6.15E-05    |
| AC007204.2 | CCND2    | -0.118783869 | 0.012755424 |
| AC007204.2 | LCN6     | -0.077926328 | 0.102982551 |
| AC007204.2 | CDH4     | -0.346544259 | 7.84E-14    |
| AC007204.2 | MMP11    | -0.406266746 | 7.08E-19    |
| AC007204.2 | B3GAT1   | -0.326763613 | 2.21E-12    |
| AC007204.2 | SPP1     | -0.231857931 | 9.05E-07    |
| AC007204.2 | HLA-DQB1 | -0.394483744 | 8.49E-18    |
| AC007204.2 | SDC3     | -0.374288508 | 4.79E-16    |
| AC007204.2 | CX3CL1   | -0.349580289 | 4.60E-14    |
| AC007204.2 | SDK1     | -0.186156215 | 8.72E-05    |
| AC007204.2 | DOCK9    | -0.262540909 | 2.36E-08    |
| AC007204.2 | CSF2     | -0.425451562 | 9.99E-21    |
| AC007204.2 | GRHL3    | -0.492547862 | 3.30E-28    |
| AC007204.2 | TMEM92   | -0.536604048 | 4.20E-34    |
| AC007204.2 | BASP1    | -0.517325724 | 2.04E-31    |
| AC007204.2 | HRH1     | -0.481347246 | 7.67E-27    |
| AC007204.2 | ESM1     | 0.028039838  | 0.557915808 |
| AC007204.2 | B4GALNT3 | -0.519421088 | 1.06E-31    |
| AC007204.2 | LMO3     | -0.058749198 | 0.219265272 |
| AC007204.2 | C9orf16  | -0.668819569 | 3.06E-58    |
| AC007204.2 | SEMA3F   | -0.157426621 | 0.000933926 |
| AC007204.2 | PLA2G12B | -0.02733003  | 0.567930654 |
| AC007204.2 | KLK6     | -0.327603908 | 1.93E-12    |
| AC007204.2 | ST3GAL5  | -0.210111561 | 9.02E-06    |
| AC007204.2 | FAM132B  | -0.088198191 | 0.064850402 |
| AC007204.2 | CDKN1A   | -0.356399548 | 1.36E-14    |
| AC007204.2 | E2F1     | -0.535560625 | 5.94E-34    |
| AC007204.2 | B3GNT8   | -0.321048417 | 5.55E-12    |
| AC007204.2 | MTMR11   | -0.397426303 | 4.61E-18    |
| AC007204.2 | MYO1G    | -0.399553014 | 2.95E-18    |
| AC007204.2 | TMSB10   | -0.505565275 | 7.33E-30    |
| AC007204.2 | UNC5CL   | -0.529112555 | 4.87E-33    |
| AC007204.2 | ABR      | -0.442555564 | 1.77E-22    |
| AC007204.2 | PLP2     | -0.502053806 | 2.08E-29    |
| AC007204.2 | SRCIN1   | -0.40700118  | 6.05E-19    |
| AC007204.2 | PDE9A    | -0.609463449 | 5.40E-46    |
| AC007204.2 | TREM2    | -0.313010065 | 1.96E-11    |
| AC007204.2 | KDELR3   | -0.307404367 | 4.63E-11    |
| AC007204.2 | PC       | -0.411488348 | 2.28E-19    |

|            |          |              |             |
|------------|----------|--------------|-------------|
| AC007204.2 | C2CD4A   | -0.517858749 | 1.73E-31    |
| AC007204.2 | PELI1    | -0.369552982 | 1.18E-15    |
| AC007204.2 | SSX1     | -0.263762697 | 2.02E-08    |
| AC007204.2 | MROH6    | -0.460648912 | 1.91E-24    |
| AC007204.2 | ESPN     | -0.328778556 | 1.59E-12    |
| AC007204.2 | BMP1     | -0.184491753 | 0.000101101 |
| AC007204.2 | TM4SF4   | -0.349669327 | 4.52E-14    |
| AC007204.2 | CORO2A   | -0.337051932 | 4.01E-13    |
| AC007204.2 | CD164L2  | -0.440833461 | 2.68E-22    |
| AC007204.2 | CTSS     | -0.358937161 | 8.55E-15    |
| AC007204.2 | CLU      | -0.371664232 | 7.92E-16    |
| AC007204.2 | TMSB4X   | -0.467031595 | 3.63E-25    |
| AC007204.2 | WNT10A   | -0.416114887 | 8.23E-20    |
| AC007204.2 | NAPSA    | -0.296378777 | 2.37E-10    |
| AC007204.2 | PLEKHA4  | -0.350441951 | 3.95E-14    |
| AC007204.2 | SFTPA1   | 0.072919745  | 0.127131015 |
| AC007204.2 | C1orf116 | -0.351412828 | 3.32E-14    |
| AC007204.2 | TM4SF1   | -0.399020272 | 3.30E-18    |
| AC007204.2 | SEL1L3   | -0.352152936 | 2.91E-14    |
| AC007204.2 | VASN     | -0.540496851 | 1.15E-34    |
| AC007204.2 | NPTXR    | -0.533175345 | 1.30E-33    |
| AC007204.2 | PDE4C    | -0.535325317 | 6.42E-34    |
| AC007204.2 | CDC42EP1 | -0.496987373 | 9.17E-29    |
| AC007204.2 | ENDOD1   | -0.46198658  | 1.35E-24    |
| AC007204.2 | RYR1     | -0.367239472 | 1.83E-15    |
| AC007204.2 | IL1RAP   | -0.331271774 | 1.05E-12    |
| AC007204.2 | SLC35F2  | -0.481344284 | 7.68E-27    |
| AC007204.2 | ISYNA1   | -0.268153841 | 1.15E-08    |
| AC007204.2 | HLA-G    | -0.49355505  | 2.47E-28    |
| AC007204.2 | CDKN2B   | -0.464375406 | 7.28E-25    |
| AC007204.2 | ALDH1A3  | -0.458815096 | 3.06E-24    |
| AC007204.2 | CLIP3    | -0.290903711 | 5.21E-10    |
| AC007204.2 | ULBP2    | -0.371230068 | 8.61E-16    |
| AC007204.2 | ETHE1    | -0.643268411 | 1.23E-52    |
| AC007204.2 | XPR1     | -0.315321731 | 1.37E-11    |
| AC007204.2 | SPTBN2   | -0.560383165 | 1.16E-37    |
| AC007204.2 | IVL      | -0.458634818 | 3.21E-24    |
| AC007204.2 | MARCO    | -0.437340344 | 6.19E-22    |
| AC007204.2 | PLXND1   | -0.106282603 | 0.025958679 |
| AC007204.2 | EMILIN2  | -0.302357224 | 9.86E-11    |
| AC007204.2 | PLAUR    | -0.460875994 | 1.80E-24    |
| AC007204.2 | CDC42EP5 | -0.51506214  | 4.11E-31    |
| AC007204.2 | TRPC5    | -0.002173024 | 0.963788363 |
| AC007204.2 | TMEM100  | -0.177447539 | 0.000186202 |
| AC007204.2 | QSOX1    | -0.493793053 | 2.31E-28    |
| AC007204.2 | ARHGAP23 | -0.326512561 | 2.30E-12    |
| AC007204.2 | MDFI     | -0.233689619 | 7.38E-07    |
| AC007204.2 | FSTL3    | -0.542560301 | 5.73E-35    |
| AC007204.2 | INF2     | -0.394263471 | 8.89E-18    |
| AC007204.2 | TGFBR1   | -0.347293161 | 6.87E-14    |
| AC007204.2 | TGFBI    | -0.197277544 | 3.15E-05    |

|            |           |              |             |
|------------|-----------|--------------|-------------|
| AC007204.2 | ERBB3     | -0.49081234  | 5.41E-28    |
| AC007204.2 | CCL18     | -0.303161868 | 8.75E-11    |
| AC007204.2 | CCL17     | -0.381223804 | 1.24E-16    |
| AC007204.2 | C16orf45  | -0.214553909 | 5.75E-06    |
| AC007204.2 | PRDM1     | -0.043556993 | 0.362584968 |
| AC007204.2 | TRIM47    | -0.605156698 | 3.33E-45    |
| AC007204.2 | CNFN      | -0.56811912  | 6.96E-39    |
| AC007204.2 | ARMCX3    | -0.148366047 | 0.001826898 |
| AC007204.2 | RAMP1     | -0.244100627 | 2.24E-07    |
| AC007204.2 | GABRD     | 0.025996387  | 0.586975831 |
| AC007204.2 | COL13A1   | -0.054160474 | 0.257473098 |
| AC007204.2 | S100A5    | -0.464200521 | 7.62E-25    |
| AC007204.2 | MISP      | -0.491183386 | 4.87E-28    |
| AC007204.2 | HES6      | -0.263943823 | 1.97E-08    |
| AC007204.2 | PSD3      | -0.300682266 | 1.26E-10    |
| AC007204.2 | DOK7      | -0.541533966 | 8.11E-35    |
| AC007204.2 | ZMAT3     | -0.471246578 | 1.19E-25    |
| AC007204.2 | MFAP2     | -0.176528858 | 0.0002013   |
| AC007204.2 | TMEM79    | -0.395611352 | 6.72E-18    |
| AC007204.2 | SLC1A5    | -0.309616321 | 3.30E-11    |
| AC007204.2 | BBC3      | -0.520798045 | 6.89E-32    |
| AC007204.2 | HLA-DQB2  | -0.371040148 | 8.93E-16    |
| AC007204.2 | C1QL1     | -0.305015967 | 6.63E-11    |
| AC007204.2 | TMEM215   | -0.032565156 | 0.496155678 |
| AC007204.2 | PNP       | -0.374018733 | 5.04E-16    |
| AC007204.2 | ARNTL     | -0.301954264 | 1.05E-10    |
| AC007204.2 | CLDN2     | -0.122182723 | 0.01039754  |
| AC007204.2 | MVP       | -0.57492689  | 5.50E-40    |
| AC007204.2 | LGALS1    | -0.492169582 | 3.67E-28    |
| AC007204.2 | BIRC7     | -0.418377546 | 4.97E-20    |
| AC007204.2 | COL8A1    | -0.342441896 | 1.60E-13    |
| AC007204.2 | PERP      | -0.580943491 | 5.56E-41    |
| AC007204.2 | GJA4      | -0.155766414 | 0.001058973 |
| AC007204.2 | IGFL2     | -0.372826314 | 6.34E-16    |
| AC007204.2 | DAPK2     | -0.339133254 | 2.82E-13    |
| AC007204.2 | MAMLD1    | -0.348406726 | 5.65E-14    |
| AC007204.2 | ETV5      | -0.083320686 | 0.081190805 |
| AC007204.2 | RUNX1     | -0.557142322 | 3.68E-37    |
| AC007204.2 | LONRF2    | -0.103822291 | 0.029630322 |
| AC007204.2 | SPOCK1    | 0.021723251  | 0.649894668 |
| AC007204.2 | XKRX      | -0.207253821 | 1.20E-05    |
| AC007204.2 | TGFB1     | -0.162554469 | 0.000628632 |
| AC007204.2 | ERP27     | -0.171104145 | 0.000316506 |
| AC007204.2 | TNFRSF10C | -0.362164813 | 4.72E-15    |
| AC007204.2 | PALM      | -0.481180303 | 8.03E-27    |
| AC007204.2 | TSC22D1   | -0.117444073 | 0.013807328 |
| AC007204.2 | TGM2      | -0.476442508 | 2.94E-26    |
| AC007204.2 | UBE2QL1   | -0.08619417  | 0.071203354 |
| AC007204.2 | ECE1      | -0.36977283  | 1.14E-15    |
| AC007204.2 | COL8A2    | -0.39766615  | 4.38E-18    |
| AC007204.2 | HIST3H2A  | -0.452321212 | 1.59E-23    |

|            |          |              |             |
|------------|----------|--------------|-------------|
| AC007204.2 | TNFRSF21 | -0.467354559 | 3.33E-25    |
| AC007204.2 | SOX4     | -0.456504706 | 5.52E-24    |
| AC007204.2 | ELF3     | -0.594130257 | 3.09E-43    |
| AC007204.2 | TPD52L1  | -0.473227054 | 6.99E-26    |
| AC007204.2 | INHBB    | -0.195105021 | 3.86E-05    |
| AC007204.2 | HPN      | -0.369296115 | 1.24E-15    |
| AC007204.2 | MMP7     | -0.424165767 | 1.34E-20    |
| AC007204.2 | RAB27A   | -0.320182925 | 6.37E-12    |
| AC007204.2 | IGF2BP2  | -0.259121209 | 3.63E-08    |
| AC007204.2 | ITGB4    | -0.428228567 | 5.27E-21    |
| AC007204.2 | PPP1R1B  | -0.35199422  | 2.99E-14    |
| AC007204.2 | NPDC1    | -0.308958338 | 3.65E-11    |
| AC007204.2 | CCL13    | -0.426339089 | 8.15E-21    |
| AC007204.2 | SPINT1   | -0.634894897 | 6.50E-51    |
| AC007204.2 | HEY2     | -0.045244716 | 0.344269139 |
| AC007204.2 | CST2     | -0.540254389 | 1.25E-34    |
| AC007204.2 | ADM      | -0.313200978 | 1.90E-11    |
| AC007204.2 | VSTM2L   | -0.549973576 | 4.54E-36    |
| AC007204.2 | FAM84A   | -0.44615483  | 7.33E-23    |
| AC007204.2 | P4HA2    | -0.31898993  | 7.69E-12    |
| AC007204.2 | LPL      | -0.179907142 | 0.000150835 |
| AC007204.2 | TMEM173  | -0.345392256 | 9.58E-14    |
| AC007204.2 | DHRS3    | -0.364005863 | 3.36E-15    |
| AC007204.2 | SCN1B    | -0.532331696 | 1.71E-33    |
| AC007204.2 | GLT1D1   | -0.140348404 | 0.003210392 |
| AC007204.2 | PHYHIP   | -0.387643493 | 3.43E-17    |
| AC007204.2 | BHLHE40  | -0.437887411 | 5.44E-22    |
| AC007204.2 | BID      | -0.504723753 | 9.42E-30    |
| AC007204.2 | POSTN    | -0.236273897 | 5.52E-07    |
| AC007204.2 | ITGA3    | -0.609021909 | 6.52E-46    |
| AC007204.2 | RSPO4    | -0.394579768 | 8.33E-18    |
| AC007204.2 | ADAMTS9  | 0.055861956  | 0.242801473 |
| AC007204.2 | ABTB2    | -0.501507164 | 2.44E-29    |
| AC007204.2 | KCNQ3    | -0.551379894 | 2.79E-36    |
| AC007204.2 | ANXA1    | -0.286346192 | 9.90E-10    |
| AC007204.2 | S100A11  | -0.617712429 | 1.54E-47    |
| AC007204.2 | CEACAM6  | -0.505464593 | 7.55E-30    |
| AC007204.2 | IER5L    | -0.529347721 | 4.52E-33    |
| AC007204.2 | KRT80    | -0.550844032 | 3.36E-36    |
| AC007204.2 | CDH6     | -0.459305995 | 2.70E-24    |
| AC007204.2 | UNC5B    | -0.332917939 | 8.02E-13    |
| AC007204.2 | PLEKHN1  | -0.534162534 | 9.41E-34    |
| AC007204.2 | SYTL1    | -0.458970266 | 2.94E-24    |
| AC007204.2 | TMEM163  | -0.412546739 | 1.81E-19    |
| AC007204.2 | C4orf48  | -0.303991191 | 7.73E-11    |
| AC007204.2 | B3GNT7   | -0.151757238 | 0.001427207 |
| AC007204.2 | BAIAP3   | -0.312406121 | 2.15E-11    |
| AC007204.2 | PHLDA2   | -0.508371528 | 3.16E-30    |
| AC007204.2 | GAP43    | -0.36709114  | 1.89E-15    |
| AC007204.2 | S100A1   | -0.589665925 | 1.84E-42    |
| AC007204.2 | PTPRE    | -0.440564734 | 2.86E-22    |

|            |            |              |             |
|------------|------------|--------------|-------------|
| AC007204.2 | CCND1      | -0.382426146 | 9.75E-17    |
| AC007204.2 | ST6GALNAC5 | -0.610883391 | 2.95E-46    |
| AC007204.2 | KRT17      | -0.192926824 | 4.72E-05    |
| AC007204.2 | HPCAL4     | -0.089338706 | 0.061447979 |
| AC007204.2 | GABBR2     | -0.039542427 | 0.408539254 |
| AC007204.2 | DIRAS3     | -0.20369824  | 1.70E-05    |
| AC007204.2 | SERINC2    | -0.533873327 | 1.03E-33    |
| AC007204.2 | PTCHD4     | -0.326834532 | 2.18E-12    |
| AC007204.2 | EPS8       | -0.16401965  | 0.000560194 |
| AC007204.2 | LY6E       | -0.515225963 | 3.90E-31    |
| AC007204.2 | UPP1       | -0.63917243  | 8.71E-52    |
| AC007204.2 | AHNAK2     | -0.560589255 | 1.08E-37    |
| AC007204.2 | PLXNC1     | -0.175099705 | 0.000227085 |
| AC007204.2 | TNC        | -0.456857456 | 5.05E-24    |
| AC007204.2 | DUSP4      | -0.283942899 | 1.38E-09    |
| AC007204.2 | NRCAM      | -0.270981938 | 7.94E-09    |
| AC007204.2 | NRP2       | -0.151462925 | 0.001458411 |
| AC007204.2 | CTSC       | -0.407396906 | 5.55E-19    |
| AC007204.2 | AMIGO2     | -0.116624394 | 0.014487868 |
| AC007204.2 | NAB2       | -0.308624027 | 3.84E-11    |
| AC007204.2 | TBC1D2     | -0.594641014 | 2.51E-43    |
| AC007204.2 | PHLDA3     | -0.613329086 | 1.03E-46    |
| AC007204.2 | PTP4A3     | -0.410296063 | 2.96E-19    |
| AC007204.2 | CRABP2     | -0.223988224 | 2.14E-06    |
| AC007204.2 | GOS2       | -0.306579299 | 5.24E-11    |
| AC007204.2 | S100A6     | -0.686084587 | 2.35E-62    |
| AC007204.2 | FOXQ1      | -0.378068191 | 2.30E-16    |
| AC007204.2 | LRG1       | -0.376024456 | 3.42E-16    |
| AC007204.2 | LAMP5      | -0.275225713 | 4.52E-09    |
| AC007204.2 | ALDH3B1    | -0.581516798 | 4.46E-41    |
| AC007204.2 | CDH2       | 0.028421806  | 0.552562197 |
| AC007204.2 | SCG5       | -0.106771942 | 0.025277134 |
| AC007204.2 | ZCCHC16    | -0.010252255 | 0.830389699 |
| AC007204.2 | GRB7       | -0.510615679 | 1.60E-30    |
| AC007204.2 | TIAM1      | -0.239722816 | 3.72E-07    |
| AC007204.2 | FXYD5      | -0.284679177 | 1.25E-09    |
| AC007204.2 | CLDN9      | -0.436225786 | 8.08E-22    |
| AC007204.2 | FAM43A     | -0.443493109 | 1.41E-22    |
| AC007204.2 | CHST2      | -0.296821877 | 2.23E-10    |
| AC007204.2 | HMGA2      | -0.207174392 | 1.21E-05    |
| AC007204.2 | GALNT7     | -0.27872697  | 2.82E-09    |
| AC007204.2 | CBLN1      | -0.324295784 | 3.30E-12    |
| AC007204.2 | STRA6      | -0.43129183  | 2.58E-21    |
| AC007204.2 | MUC21      | -0.494940248 | 1.66E-28    |
| AC007204.2 | PRR36      | -0.376938598 | 2.87E-16    |
| AC007204.2 | NFE2L3     | -0.418850703 | 4.47E-20    |
| AC007204.2 | NR1D1      | -0.409714671 | 3.36E-19    |
| AC007204.2 | MUC1       | -0.666621515 | 9.76E-58    |
| AC007204.2 | NAT8L      | -0.044562904 | 0.351596402 |
| AC007204.2 | APOC1      | -0.114985463 | 0.015937498 |
| AC007204.2 | EVA1A      | -0.565697388 | 1.69E-38    |

|            |           |              |             |
|------------|-----------|--------------|-------------|
| AC007204.2 | ENTPD1    | -0.156623821 | 0.000992584 |
| AC007204.2 | COL1A1    | -0.285001289 | 1.19E-09    |
| AC007204.2 | FNDC4     | -0.358838301 | 8.70E-15    |
| AC007204.2 | FRMD3     | 0.133970259  | 0.004928493 |
| AC007204.2 | SHROOM4   | -0.19858103  | 2.78E-05    |
| AC007204.2 | NELL2     | -0.102669011 | 0.031499278 |
| AC007204.2 | EPHB3     | -0.550207324 | 4.19E-36    |
| AC007204.2 | TMC6      | -0.551367412 | 2.80E-36    |
| AC007204.2 | NOD1      | -0.22507172  | 1.90E-06    |
| AC007204.2 | GGCT      | -0.453199611 | 1.27E-23    |
| AC007204.2 | ICAM1     | -0.371077309 | 8.86E-16    |
| AC007204.2 | PRSS23    | -0.318030968 | 8.95E-12    |
| AC007204.2 | CFI       | -0.361542147 | 5.30E-15    |
| AC007204.2 | CD55      | -0.547360789 | 1.12E-35    |
| AC007204.2 | RASD2     | -0.386559856 | 4.27E-17    |
| AC007204.2 | KLK11     | -0.191046559 | 5.61E-05    |
| AC007204.2 | ICAM5     | -0.268277524 | 1.13E-08    |
| AC007204.2 | ADORA1    | -0.458676804 | 3.17E-24    |
| AC007204.2 | ITGA2     | -0.395688937 | 6.62E-18    |
| AC007204.2 | ABCC3     | -0.296809963 | 2.23E-10    |
| AC007204.2 | MFGE8     | -0.441864107 | 2.09E-22    |
| AC007204.2 | STK32A    | -0.177864825 | 0.0001797   |
| AC007204.2 | CYSLTR2   | -0.1412451   | 0.003018398 |
| AC007204.2 | LAD1      | -0.57066652  | 2.71E-39    |
| AC007204.2 | MGAT3     | -0.547064207 | 1.24E-35    |
| AC007204.2 | IGFBP6    | -0.306002446 | 5.72E-11    |
| AC007204.2 | CYP2S1    | -0.567806652 | 7.80E-39    |
| AC007204.2 | KCNJ2     | -0.221066515 | 2.92E-06    |
| AC007204.2 | FAM20A    | -0.351382333 | 3.34E-14    |
| AC007204.2 | TGFA      | -0.233328501 | 7.68E-07    |
| AC007204.2 | MXRA8     | -0.417462115 | 6.09E-20    |
| AC007204.2 | C8orf4    | -0.320692121 | 5.87E-12    |
| AC007204.2 | CLDN10    | -0.341380355 | 1.92E-13    |
| AC007204.2 | PDE5A     | -0.321589526 | 5.09E-12    |
| AC007204.2 | APOE      | -0.098301837 | 0.039516415 |
| AC007204.2 | SPOCK2    | -0.514245015 | 5.28E-31    |
| AC007204.2 | TENM1     | 0.052994713  | 0.26787241  |
| AC007204.2 | SLIT1     | -0.032757067 | 0.493619296 |
| AC007204.2 | CXCL14    | -0.137274078 | 0.003955806 |
| AC007204.2 | ECM1      | 0.001416388  | 0.976392417 |
| AC007204.2 | DUSP5     | -0.571734555 | 1.82E-39    |
| AC007204.2 | SEZ6L2    | -0.405557417 | 8.25E-19    |
| AC007204.2 | THRSP     | -0.191315125 | 5.47E-05    |
| AC007204.2 | C19orf33  | -0.648111875 | 1.17E-53    |
| AC007204.2 | MPZL2     | -0.363904024 | 3.42E-15    |
| AC007204.2 | CTSH      | -0.44182808  | 2.11E-22    |
| AC007204.2 | CYP1B1    | -0.409710558 | 3.36E-19    |
| AC007204.2 | ALOX5     | -0.543607913 | 4.02E-35    |
| AC007204.2 | SYTL5     | -0.324669183 | 3.10E-12    |
| AC007204.2 | TNFRSF12A | -0.467325908 | 3.36E-25    |
| AC007204.2 | DUSP6     | -0.361418465 | 5.42E-15    |

|            |          |              |             |
|------------|----------|--------------|-------------|
| AC007204.2 | ALOX15B  | -0.51343484  | 6.77E-31    |
| AC007204.2 | SDC4     | -0.407941562 | 4.94E-19    |
| AC007204.2 | MDK      | -0.323375685 | 3.82E-12    |
| AC007204.2 | KRT19    | -0.673715371 | 2.22E-59    |
| AC007204.2 | MET      | -0.463865643 | 8.31E-25    |
| AC007204.2 | TESC     | -0.078721892 | 0.09950434  |
| AC007204.2 | CXCL17   | -0.595702333 | 1.64E-43    |
| AC007204.2 | NPC2     | -0.328619982 | 1.63E-12    |
| AC007204.2 | COMP     | -0.324961144 | 2.96E-12    |
| AC007204.2 | TUSC3    | -0.252884193 | 7.83E-08    |
| AC007204.2 | TMPRSS4  | -0.607029661 | 1.51E-45    |
| AC007204.2 | LGALS3   | -0.589806202 | 1.74E-42    |
| AC007204.2 | CRLF1    | -0.449771401 | 3.00E-23    |
| AC007204.2 | CTXN1    | -0.5297182   | 4.01E-33    |
| AC007204.2 | PCSK1N   | -0.224583516 | 2.00E-06    |
| AC007204.2 | NMU      | -0.416386904 | 7.74E-20    |
| AC007204.2 | GALE     | -0.489222768 | 8.49E-28    |
| AC007204.2 | PCSK2    | -0.055923513 | 0.242281883 |
| AC007204.2 | GJB3     | -0.433718242 | 1.46E-21    |
| AC007204.2 | SLPI     | -0.609445577 | 5.45E-46    |
| AC007204.2 | AGR2     | -0.264073037 | 1.94E-08    |
| AC007204.2 | MRC2     | -0.41103688  | 2.52E-19    |
| AC007204.2 | GOLT1A   | -0.353836972 | 2.15E-14    |
| AC007204.2 | SLC27A6  | -0.373767553 | 5.29E-16    |
| AC007204.2 | KCNN4    | -0.561861962 | 6.80E-38    |
| AC007204.2 | ETV4     | -0.320914959 | 5.67E-12    |
| AC007204.2 | SYT12    | -0.481556881 | 7.24E-27    |
| AC007204.2 | PVRL4    | -0.565092735 | 2.11E-38    |
| AC007204.2 | PLCD3    | -0.55328633  | 1.43E-36    |
| AC007204.2 | PLAU     | -0.462466275 | 1.20E-24    |
| AC007204.2 | LRRK2    | 0.009617144  | 0.840751992 |
| AC007204.2 | SFN      | -0.581085896 | 5.26E-41    |
| AC007204.2 | LPAR5    | -0.409343057 | 3.64E-19    |
| AC007204.2 | NGEF     | -0.518973449 | 1.22E-31    |
| AC007204.2 | DTX4     | -0.359323243 | 7.96E-15    |
| AC007204.2 | CST6     | -0.446901321 | 6.10E-23    |
| AC007204.2 | QPCT     | -0.275133235 | 4.58E-09    |
| AC007204.2 | TIMP1    | -0.453647533 | 1.14E-23    |
| AC007204.2 | CAMK2N1  | -0.356552165 | 1.32E-14    |
| AC007204.2 | KLHDC8A  | -0.059899642 | 0.210357302 |
| AC007204.2 | PDLIM4   | -0.615973361 | 3.28E-47    |
| AC007204.2 | SCEL     | -0.385387995 | 5.40E-17    |
| AC007204.2 | LCN2     | -0.676490846 | 4.92E-60    |
| AC007204.2 | PROS1    | -0.550835522 | 3.37E-36    |
| AC007204.2 | GABRB2   | -0.409279514 | 3.69E-19    |
| AC007204.2 | TMPRSS6  | -0.55925187  | 1.74E-37    |
| AC007204.2 | KLK7     | -0.416492774 | 7.56E-20    |
| AC007204.2 | PDZK1IP1 | -0.479227344 | 1.37E-26    |
| AC007204.2 | CDH3     | -0.312458885 | 2.14E-11    |
| AC007204.2 | LRP4     | -0.044273414 | 0.354737032 |
| AC007204.2 | IGSF1    | -0.171391791 | 0.000309105 |

|            |           |              |             |
|------------|-----------|--------------|-------------|
| AC007204.2 | B3GNT3    | -0.666264085 | 1.18E-57    |
| AC007204.2 | CLDN1     | -0.480488562 | 9.72E-27    |
| AC007204.2 | GDF15     | -0.673895647 | 2.02E-59    |
| AC007204.2 | ARHGAP36  | -0.111799136 | 0.019123057 |
| AC007204.2 | LAMB3     | -0.516039258 | 3.04E-31    |
| AC007204.2 | KLK10     | -0.378422501 | 2.15E-16    |
| AC007204.2 | DPP4      | -0.4267397   | 7.43E-21    |
| AC007204.2 | METTL7B   | -0.369820771 | 1.13E-15    |
| AC007204.2 | LIPH      | -0.511834063 | 1.10E-30    |
| AC007204.2 | CLDN16    | -0.441860277 | 2.09E-22    |
| AC007204.2 | CHI3L1    | -0.45703688  | 4.82E-24    |
| AC007204.2 | SLC22A31  | -0.40580301  | 7.83E-19    |
| AC007204.2 | TACSTD2   | -0.525436696 | 1.59E-32    |
| AC007204.2 | SFTPB     | -0.459053241 | 2.88E-24    |
| AC007204.2 | RXRG      | -0.129271753 | 0.006683611 |
| AC007204.2 | DCSTAMP   | -0.515689844 | 3.38E-31    |
| AC007204.2 | CITED1    | -0.300964806 | 1.21E-10    |
| AC007204.2 | SERPINA1  | -0.546003547 | 1.78E-35    |
| AC007204.2 | PRR15     | -0.191803897 | 5.23E-05    |
| AC007204.2 | SLC34A2   | -0.607996708 | 1.01E-45    |
| AC007204.2 | FN1       | -0.602595256 | 9.69E-45    |
| AC007204.2 | ZCCHC12   | -0.062295275 | 0.19265152  |
| AF131216.5 | TFF3      | 0.839520106  | 7.57E-118   |
| AF131216.5 | CCL21     | 0.470337925  | 1.51E-25    |
| AF131216.5 | TPO       | 0.807778523  | 2.35E-102   |
| AF131216.5 | MT1G      | 0.759613265  | 1.13E-83    |
| AF131216.5 | DIO1      | 0.759253848  | 1.50E-83    |
| AF131216.5 | DPT       | 0.377295884  | 2.67E-16    |
| AF131216.5 | CDH16     | 0.754678163  | 5.22E-82    |
| AF131216.5 | CRABP1    | 0.706745169  | 1.13E-67    |
| AF131216.5 | SLC26A7   | 0.764698999  | 1.97E-85    |
| AF131216.5 | MT1H      | 0.706623639  | 1.22E-67    |
| AF131216.5 | SLC26A4   | 0.768978811  | 6.03E-87    |
| AF131216.5 | SLC5A8    | 0.751806132  | 4.66E-81    |
| AF131216.5 | PKHD1L1   | 0.743734582  | 1.87E-78    |
| AF131216.5 | TFCP2L1   | 0.703344534  | 9.12E-67    |
| AF131216.5 | WSCD2     | 0.830968171  | 2.34E-113   |
| AF131216.5 | IPCEF1    | 0.691796389  | 8.82E-64    |
| AF131216.5 | SLC5A5    | 0.621728782  | 2.61E-48    |
| AF131216.5 | MT1F      | 0.78723276   | 8.58E-94    |
| AF131216.5 | FOSB      | 0.480849778  | 8.80E-27    |
| AF131216.5 | SEMA3D    | 0.759242245  | 1.51E-83    |
| AF131216.5 | BMP8A     | 0.707906603  | 5.50E-68    |
| AF131216.5 | MATN2     | 0.759146477  | 1.63E-83    |
| AF131216.5 | PLA2R1    | 0.701577661  | 2.67E-66    |
| AF131216.5 | COL23A1   | 0.724935216  | 9.37E-73    |
| AF131216.5 | HGD       | 0.82874597   | 3.12E-112   |
| AF131216.5 | TCEAL2    | 0.594276989  | 2.91E-43    |
| AF131216.5 | CHRDL1    | 0.396068768  | 6.12E-18    |
| AF131216.5 | TNFRSF11B | 0.571381684  | 2.08E-39    |
| AF131216.5 | FAM167A   | 0.805081053  | 3.57E-101   |



|            |            |             |             |
|------------|------------|-------------|-------------|
| AF131216.5 | KIT        | 0.748730765 | 4.70E-80    |
| AF131216.5 | SLC4A4     | 0.792766701 | 5.29E-96    |
| AF131216.5 | SMOC2      | 0.534006306 | 9.90E-34    |
| AF131216.5 | FHL1       | 0.807528889 | 3.03E-102   |
| AF131216.5 | OTOS       | 0.733139252 | 3.50E-75    |
| AF131216.5 | IGFBPL1    | 0.729151729 | 5.43E-74    |
| AF131216.5 | HBB        | 0.459485895 | 2.58E-24    |
| AF131216.5 | BEX1       | 0.64097451  | 3.70E-52    |
| AF131216.5 | FABP4      | 0.660999397 | 1.82E-56    |
| AF131216.5 | LMOD1      | 0.75422102  | 7.41E-82    |
| AF131216.5 | SOD3       | 0.691981629 | 7.92E-64    |
| AF131216.5 | TMEM171    | 0.650759612 | 3.19E-54    |
| AF131216.5 | PI16       | 0.473590665 | 6.34E-26    |
| AF131216.5 | ZMAT4      | 0.83195061  | 7.34E-114   |
| AF131216.5 | MFAP4      | 0.340465029 | 2.24E-13    |
| AF131216.5 | CWH43      | 0.694571965 | 1.74E-64    |
| AF131216.5 | SPX        | 0.809203141 | 5.48E-103   |
| AF131216.5 | APOD       | 0.258854717 | 3.75E-08    |
| AF131216.5 | DPP6       | 0.744359752 | 1.18E-78    |
| AF131216.5 | MMRN1      | 0.512054222 | 1.03E-30    |
| AF131216.5 | WDR72      | 0.619983802 | 5.65E-48    |
| AF131216.5 | MPPED2     | 0.859939776 | 1.00E-129   |
| AF131216.5 | PAPSS2     | 0.56651665  | 1.25E-38    |
| AF131216.5 | DCN        | 0.169015121 | 0.000375422 |
| AF131216.5 | SORBS2     | 0.804182795 | 8.76E-101   |
| AF131216.5 | EGR2       | 0.44185972  | 2.09E-22    |
| AF131216.5 | EDN3       | 0.641113288 | 3.46E-52    |
| AF131216.5 | DIO2       | 0.689177781 | 4.01E-63    |
| AF131216.5 | ITPR1      | 0.787168082 | 9.10E-94    |
| AF131216.5 | CFD        | 0.363171407 | 3.92E-15    |
| AF131216.5 | CPXM1      | 0.523981073 | 2.52E-32    |
| AF131216.5 | ELMO1      | 0.787019436 | 1.04E-93    |
| AF131216.5 | GPC3       | 0.604082111 | 5.22E-45    |
| AF131216.5 | MYOC       | 0.349006476 | 5.09E-14    |
| AF131216.5 | DEPTOR     | 0.725925527 | 4.82E-73    |
| AF131216.5 | DGKI       | 0.71177778  | 4.86E-69    |
| AF131216.5 | CARTPT     | 0.71988262  | 2.65E-71    |
| AF131216.5 | IYD        | 0.548366526 | 7.91E-36    |
| AF131216.5 | LYVE1      | 0.475477249 | 3.81E-26    |
| AF131216.5 | CLCNKB     | 0.785485461 | 4.15E-93    |
| AF131216.5 | NCAM1      | 0.494476555 | 1.90E-28    |
| AF131216.5 | HBA2       | 0.43627344  | 7.99E-22    |
| AF131216.5 | GLT8D2     | 0.624768273 | 6.71E-49    |
| AF131216.5 | OGDHL      | 0.637517499 | 1.90E-51    |
| AF131216.5 | LIFR       | 0.630786731 | 4.35E-50    |
| AF131216.5 | CSGALNACT1 | 0.534985838 | 7.18E-34    |
| AF131216.5 | RAP1GAP    | 0.649107061 | 7.20E-54    |
| AF131216.5 | COL9A3     | 0.756457376 | 1.32E-82    |
| AF131216.5 | FBLN1      | 0.219681546 | 3.37E-06    |
| AF131216.5 | EFEMP1     | 0.494400955 | 1.94E-28    |
| AF131216.5 | AOX1       | 0.625328767 | 5.21E-49    |

|            |          |             |             |
|------------|----------|-------------|-------------|
| AF131216.5 | GRIN2C   | 0.767593198 | 1.88E-86    |
| AF131216.5 | C11orf74 | 0.77335876  | 1.57E-88    |
| AF131216.5 | PPARGC1A | 0.695476085 | 1.02E-64    |
| AF131216.5 | ANGPTL1  | 0.699744267 | 8.06E-66    |
| AF131216.5 | SCARA5   | 0.360992305 | 5.86E-15    |
| AF131216.5 | LTF      | 0.665636121 | 1.64E-57    |
| AF131216.5 | CA4      | 0.720034764 | 2.40E-71    |
| AF131216.5 | TG       | 0.729634583 | 3.91E-74    |
| AF131216.5 | FCGBP    | 0.738833186 | 6.38E-77    |
| AF131216.5 | PBX4     | 0.788918643 | 1.85E-94    |
| AF131216.5 | CYR61    | 0.508693377 | 2.86E-30    |
| AF131216.5 | FOS      | 0.502285431 | 1.94E-29    |
| AF131216.5 | KHDRBS2  | 0.72405185  | 1.69E-72    |
| AF131216.5 | MUM1L1   | 0.561536159 | 7.65E-38    |
| AF131216.5 | RGS16    | 0.682335812 | 1.94E-61    |
| AF131216.5 | MT1M     | 0.649057276 | 7.38E-54    |
| AF131216.5 | LRP2     | 0.676030558 | 6.32E-60    |
| AF131216.5 | MAFB     | 0.602143736 | 1.17E-44    |
| AF131216.5 | KCNK2    | 0.620295278 | 4.93E-48    |
| AF131216.5 | TBC1D4   | 0.661165112 | 1.67E-56    |
| AF131216.5 | MIOX     | 0.785126781 | 5.72E-93    |
| AF131216.5 | TPPP     | 0.689121755 | 4.14E-63    |
| AF131216.5 | FMOD     | 0.646373706 | 2.74E-53    |
| AF131216.5 | CITED2   | 0.484853857 | 2.90E-27    |
| AF131216.5 | RGS8     | 0.783286331 | 2.95E-92    |
| AF131216.5 | ABI3BP   | 0.370804972 | 9.33E-16    |
| AF131216.5 | ADH1B    | 0.445836317 | 7.93E-23    |
| AF131216.5 | OGN      | 0.298990037 | 1.62E-10    |
| AF131216.5 | NR4A1    | 0.446674118 | 6.46E-23    |
| AF131216.5 | FOXJ1    | 0.757507915 | 5.86E-83    |
| AF131216.5 | ALDH1A1  | 0.705490255 | 2.45E-67    |
| AF131216.5 | OCA2     | 0.638163698 | 1.40E-51    |
| AF131216.5 | TMEM139  | 0.484950307 | 2.82E-27    |
| AF131216.5 | ARHGAP24 | 0.740215678 | 2.38E-77    |
| AF131216.5 | SLC25A15 | 0.637381477 | 2.03E-51    |
| AF131216.5 | DES      | 0.338836248 | 2.96E-13    |
| AF131216.5 | GDF10    | 0.590584205 | 1.28E-42    |
| AF131216.5 | KIAA1324 | 0.707689449 | 6.29E-68    |
| AF131216.5 | JUN      | 0.522213066 | 4.41E-32    |
| AF131216.5 | C7       | 0.14890792  | 0.001756822 |
| AF131216.5 | LGI3     | 0.777716015 | 3.84E-90    |
| AF131216.5 | CDON     | 0.792135949 | 9.52E-96    |
| AF131216.5 | BCL2     | 0.711938766 | 4.39E-69    |
| AF131216.5 | HLF      | 0.755444796 | 2.89E-82    |
| AF131216.5 | EGR1     | 0.495737776 | 1.32E-28    |
| AF131216.5 | IP6K3    | 0.628338754 | 1.33E-49    |
| AF131216.5 | SCUBE3   | 0.649838518 | 5.02E-54    |
| AF131216.5 | PKNOX2   | 0.761479424 | 2.59E-84    |
| AF131216.5 | SMAD9    | 0.565176141 | 2.05E-38    |
| AF131216.5 | IQGAP2   | 0.698517796 | 1.68E-65    |
| AF131216.5 | GNA14    | 0.837343606 | 1.11E-116   |

|            |          |             |             |
|------------|----------|-------------|-------------|
| AF131216.5 | LAYN     | 0.694531021 | 1.78E-64    |
| AF131216.5 | AVPR1A   | 0.707857669 | 5.67E-68    |
| AF131216.5 | PDLIM3   | 0.565856962 | 1.60E-38    |
| AF131216.5 | GPM6A    | 0.639543084 | 7.30E-52    |
| AF131216.5 | SDPR     | 0.580167681 | 7.49E-41    |
| AF131216.5 | CRYAB    | 0.319542687 | 7.05E-12    |
| AF131216.5 | FOXA2    | 0.620001345 | 5.61E-48    |
| AF131216.5 | C8orf88  | 0.614586451 | 5.99E-47    |
| AF131216.5 | ISM1     | 0.564078601 | 3.05E-38    |
| AF131216.5 | BMP2     | 0.429591607 | 3.84E-21    |
| AF131216.5 | ID4      | 0.698391418 | 1.81E-65    |
| AF131216.5 | NUPR1    | 0.409407246 | 3.59E-19    |
| AF131216.5 | SERTM1   | 0.586107701 | 7.48E-42    |
| AF131216.5 | IRS1     | 0.679372396 | 1.01E-60    |
| AF131216.5 | FIBIN    | 0.28512647  | 1.17E-09    |
| AF131216.5 | PODN     | 0.246835955 | 1.62E-07    |
| AF131216.5 | TDRD9    | 0.517534406 | 1.91E-31    |
| AF131216.5 | EPHA3    | 0.45665836  | 5.31E-24    |
| AF131216.5 | AIF1L    | 0.522626523 | 3.87E-32    |
| AF131216.5 | EBF4     | 0.797312175 | 7.18E-98    |
| AF131216.5 | ADM2     | 0.651891903 | 1.82E-54    |
| AF131216.5 | GSTM3    | 0.744973767 | 7.55E-79    |
| AF131216.5 | HSD17B6  | 0.526002403 | 1.32E-32    |
| AF131216.5 | AGR3     | 0.485668897 | 2.31E-27    |
| AF131216.5 | EPHB1    | 0.505426003 | 7.64E-30    |
| AF131216.5 | TMOD1    | 0.450195381 | 2.70E-23    |
| AF131216.5 | WASF3    | 0.726002686 | 4.58E-73    |
| AF131216.5 | SELV     | 0.807581977 | 2.87E-102   |
| AF131216.5 | ENPP1    | 0.3888134   | 2.71E-17    |
| AF131216.5 | SYNE1    | 0.772123594 | 4.43E-88    |
| AF131216.5 | PLCH1    | 0.702174231 | 1.86E-66    |
| AF131216.5 | CCDC146  | 0.76983466  | 2.97E-87    |
| AF131216.5 | SLC16A2  | 0.753623741 | 1.17E-81    |
| AF131216.5 | IER2     | 0.639235154 | 8.45E-52    |
| AF131216.5 | KCNAB1   | 0.731279617 | 1.26E-74    |
| AF131216.5 | SYNDIG1  | 0.639453301 | 7.62E-52    |
| AF131216.5 | C16orf89 | 0.794752146 | 8.19E-97    |
| AF131216.5 | CTGF     | 0.361912739 | 4.95E-15    |
| AF131216.5 | NR4A3    | 0.261062705 | 2.84E-08    |
| AF131216.5 | KIAA1456 | 0.647518478 | 1.57E-53    |
| AF131216.5 | AQP4     | 0.567315905 | 9.35E-39    |
| AF131216.5 | RNF150   | 0.715804411 | 3.74E-70    |
| AF131216.5 | C1S      | 0.099015362 | 0.038099213 |
| AF131216.5 | PFKFB2   | 0.539471172 | 1.62E-34    |
| AF131216.5 | PROX1    | 0.666455943 | 1.07E-57    |
| AF131216.5 | TCF7L1   | 0.820354424 | 3.99E-108   |
| AF131216.5 | HSPB6    | 0.459402353 | 2.64E-24    |
| AF131216.5 | FHDC1    | 0.510109343 | 1.87E-30    |
| AF131216.5 | PRR15L   | 0.543726446 | 3.86E-35    |
| AF131216.5 | SLC1A1   | 0.486754483 | 1.70E-27    |
| AF131216.5 | BTBD11   | 0.805569259 | 2.19E-101   |

|            |          |             |             |
|------------|----------|-------------|-------------|
| AF131216.5 | TRIM58   | 0.599083586 | 4.12E-44    |
| AF131216.5 | LRIG1    | 0.598658499 | 4.91E-44    |
| AF131216.5 | ROR2     | 0.466529273 | 4.14E-25    |
| AF131216.5 | GPR125   | 0.700015886 | 6.84E-66    |
| AF131216.5 | FLRT1    | 0.847163174 | 4.35E-122   |
| AF131216.5 | PGF      | 0.755680672 | 2.41E-82    |
| AF131216.5 | DUSP1    | 0.435729209 | 9.09E-22    |
| AF131216.5 | PLA2G7   | 0.507419674 | 4.20E-30    |
| AF131216.5 | PLSCR4   | 0.505777618 | 6.88E-30    |
| AF131216.5 | FAM46B   | 0.51686011  | 2.35E-31    |
| AF131216.5 | GLDC     | 0.61830189  | 1.19E-47    |
| AF131216.5 | ZBTB16   | 0.435925938 | 8.67E-22    |
| AF131216.5 | OMD      | 0.18751193  | 7.73E-05    |
| AF131216.5 | HSD11B2  | 0.754035071 | 8.54E-82    |
| AF131216.5 | FGL2     | 0.215761009 | 5.08E-06    |
| AF131216.5 | CLCNKA   | 0.848073235 | 1.31E-122   |
| AF131216.5 | GATM     | 0.593700986 | 3.67E-43    |
| AF131216.5 | TNS3     | 0.490046537 | 6.73E-28    |
| AF131216.5 | TOB1     | 0.500151625 | 3.64E-29    |
| AF131216.5 | MARC2    | 0.736047067 | 4.59E-76    |
| AF131216.5 | LRRC2    | 0.591525195 | 8.78E-43    |
| AF131216.5 | SORD     | 0.444547403 | 1.09E-22    |
| AF131216.5 | RIMS4    | 0.684254026 | 6.61E-62    |
| AF131216.5 | SLC29A4  | 0.77321054  | 1.78E-88    |
| AF131216.5 | SLC39A14 | 0.625831205 | 4.16E-49    |
| AF131216.5 | FAXDC2   | 0.740994509 | 1.36E-77    |
| AF131216.5 | HSPB8    | 0.44942421  | 3.27E-23    |
| AF131216.5 | CCL19    | 0.011200257 | 0.814977438 |
| AF131216.5 | KCNIP3   | 0.741735186 | 7.97E-78    |
| AF131216.5 | CGNL1    | 0.675573273 | 8.12E-60    |
| AF131216.5 | ATF3     | 0.197725632 | 3.02E-05    |
| AF131216.5 | SGCD     | 0.442735851 | 1.69E-22    |
| AF131216.5 | STARD13  | 0.640765158 | 4.08E-52    |
| AF131216.5 | LDHD     | 0.758063546 | 3.80E-83    |
| AF131216.5 | RCAN1    | 0.505208849 | 8.15E-30    |
| AF131216.5 | ID3      | 0.57588489  | 3.83E-40    |
| AF131216.5 | SYTL3    | 0.716684089 | 2.12E-70    |
| AF131216.5 | MT1E     | 0.565223231 | 2.01E-38    |
| AF131216.5 | CAMK1D   | 0.616525514 | 2.58E-47    |
| AF131216.5 | PRKCQ    | 0.680934881 | 4.24E-61    |
| AF131216.5 | NUAK2    | 0.457792636 | 3.98E-24    |
| AF131216.5 | LIPG     | 0.677254475 | 3.24E-60    |
| AF131216.5 | SLC25A25 | 0.424423749 | 1.26E-20    |
| AF131216.5 | PRKX     | 0.301732122 | 1.08E-10    |
| AF131216.5 | SRPX     | 0.320764335 | 5.81E-12    |
| AF131216.5 | FAM189A1 | 0.704854822 | 3.62E-67    |
| AF131216.5 | PLEKHH1  | 0.646556393 | 2.51E-53    |
| AF131216.5 | WNT11    | 0.656623609 | 1.69E-55    |
| AF131216.5 | SNAI1    | 0.520872274 | 6.73E-32    |
| AF131216.5 | FDCSP    | 0.068470482 | 0.152084619 |
| AF131216.5 | MT1X     | 0.518603437 | 1.37E-31    |

|            |          |             |           |
|------------|----------|-------------|-----------|
| AF131216.5 | ACACB    | 0.76195841  | 1.77E-84  |
| AF131216.5 | ARC      | 0.316643807 | 1.11E-11  |
| AF131216.5 | KLK4     | 0.290799269 | 5.29E-10  |
| AF131216.5 | ZFPM2    | 0.443523618 | 1.40E-22  |
| AF131216.5 | AKAP12   | 0.428821428 | 4.59E-21  |
| AF131216.5 | GJB6     | 0.516721608 | 2.46E-31  |
| AF131216.5 | ERO1LB   | 0.717178252 | 1.54E-70  |
| AF131216.5 | DNALI1   | 0.667319026 | 6.76E-58  |
| AF131216.5 | HKDC1    | 0.475760782 | 3.53E-26  |
| AF131216.5 | ZFP36L2  | 0.562169181 | 6.09E-38  |
| AF131216.5 | CAPSL    | 0.789920643 | 7.38E-95  |
| AF131216.5 | CYP7B1   | 0.5597317   | 1.46E-37  |
| AF131216.5 | CPQ      | 0.679419061 | 9.84E-61  |
| AF131216.5 | RPS6KA6  | 0.721561914 | 8.80E-72  |
| AF131216.5 | TLE1     | 0.587408922 | 4.49E-42  |
| AF131216.5 | TP53INP2 | 0.747078497 | 1.60E-79  |
| AF131216.5 | KATNAL2  | 0.828532788 | 3.99E-112 |
| AF131216.5 | SGPP2    | 0.239688609 | 3.74E-07  |
| AF131216.5 | CTH      | 0.603912736 | 5.60E-45  |
| AF131216.5 | KIF12    | 0.561207663 | 8.61E-38  |
| AF131216.5 | TMEM220  | 0.720431442 | 1.85E-71  |
| AF131216.5 | CENPJ    | 0.623184654 | 1.36E-48  |
| AF131216.5 | FAM155B  | 0.598531128 | 5.17E-44  |
| AF131216.5 | WFS1     | 0.727442481 | 1.73E-73  |
| AF131216.5 | SELENBP1 | 0.687639692 | 9.68E-63  |
| AF131216.5 | SNTA1    | 0.610355573 | 3.70E-46  |
| AF131216.5 | FRAS1    | 0.282660621 | 1.65E-09  |
| AF131216.5 | FBLN7    | 0.702165295 | 1.87E-66  |
| AF131216.5 | AGPAT9   | 0.616716428 | 2.37E-47  |
| AF131216.5 | GPR83    | 0.614187887 | 7.12E-47  |
| AF131216.5 | PRTG     | 0.617171018 | 1.95E-47  |
| AF131216.5 | EGR3     | 0.280843396 | 2.12E-09  |
| AF131216.5 | GRAMD2   | 0.527953381 | 7.08E-33  |
| AF131216.5 | HYOU1    | 0.646054003 | 3.20E-53  |
| AF131216.5 | FBLN5    | 0.430053005 | 3.45E-21  |
| AF131216.5 | ITM2A    | 0.673617898 | 2.34E-59  |
| AF131216.5 | SRF      | 0.571581391 | 1.93E-39  |
| AF131216.5 | FGFR2    | 0.481239832 | 7.90E-27  |
| AF131216.5 | MT1A     | 0.361270156 | 5.57E-15  |
| AF131216.5 | MAMDC2   | 0.356102923 | 1.43E-14  |
| AF131216.5 | FHL2     | 0.451141297 | 2.13E-23  |
| AF131216.5 | FTCDNL1  | 0.564115337 | 3.01E-38  |
| AF131216.5 | PKIA     | 0.514758216 | 4.51E-31  |
| AF131216.5 | DNAJB4   | 0.523383085 | 3.05E-32  |
| AF131216.5 | SLC25A33 | 0.699930216 | 7.20E-66  |
| AF131216.5 | EYA2     | 0.392365442 | 1.31E-17  |
| AF131216.5 | LPAR1    | 0.275033438 | 4.64E-09  |
| AF131216.5 | STX11    | 0.299200744 | 1.57E-10  |
| AF131216.5 | ARHGEF28 | 0.51131936  | 1.29E-30  |
| AF131216.5 | OR2W3    | 0.675852977 | 6.97E-60  |
| AF131216.5 | ALDH1B1  | 0.531214887 | 2.47E-33  |

|            |          |             |             |
|------------|----------|-------------|-------------|
| AF131216.5 | CXCL12   | 0.272125055 | 6.83E-09    |
| AF131216.5 | OLFM2    | 0.648928629 | 7.86E-54    |
| AF131216.5 | TUB      | 0.521645857 | 5.28E-32    |
| AF131216.5 | HTRA3    | 0.37574135  | 3.62E-16    |
| AF131216.5 | CKB      | 0.5897674   | 1.77E-42    |
| AF131216.5 | RGS2     | 0.117777516 | 0.013538638 |
| AF131216.5 | SHANK2   | 0.749685049 | 2.30E-80    |
| AF131216.5 | CNTFR    | 0.693053122 | 4.24E-64    |
| AF131216.5 | CYTH3    | 0.698071574 | 2.19E-65    |
| AF131216.5 | PLAC9    | 0.536470879 | 4.39E-34    |
| AF131216.5 | WVOX     | 0.748141429 | 7.28E-80    |
| AF131216.5 | NPR3     | 0.607641224 | 1.17E-45    |
| AF131216.5 | SDC2     | 0.532244823 | 1.76E-33    |
| AF131216.5 | KLF15    | 0.644947811 | 5.48E-53    |
| AF131216.5 | TMEM164  | 0.690629632 | 1.74E-63    |
| AF131216.5 | LONRF3   | 0.28154762  | 1.92E-09    |
| AF131216.5 | GBP1     | 0.209391786 | 9.69E-06    |
| AF131216.5 | ARHGAP6  | 0.521326864 | 5.83E-32    |
| AF131216.5 | TMEM119  | 0.185119661 | 9.56E-05    |
| AF131216.5 | SH3RF1   | 0.514820058 | 4.42E-31    |
| AF131216.5 | CRELD2   | 0.675410301 | 8.87E-60    |
| AF131216.5 | PCP4     | 0.083266268 | 0.081390357 |
| AF131216.5 | GCSH     | 0.803824938 | 1.25E-100   |
| AF131216.5 | IMPA2    | 0.648921395 | 7.89E-54    |
| AF131216.5 | C1R      | 0.0808468   | 0.090670878 |
| AF131216.5 | SUCNR1   | 0.470768519 | 1.35E-25    |
| AF131216.5 | SFRP1    | 0.540939902 | 9.90E-35    |
| AF131216.5 | UGT8     | 0.564567515 | 2.55E-38    |
| AF131216.5 | TLE4     | 0.327694385 | 1.90E-12    |
| AF131216.5 | ANTXR1   | 0.467902404 | 2.89E-25    |
| AF131216.5 | GPX3     | 0.539901508 | 1.40E-34    |
| AF131216.5 | DPY19L2  | 0.696726243 | 4.88E-65    |
| AF131216.5 | FAM46C   | 0.505202892 | 8.17E-30    |
| AF131216.5 | IL33     | 0.364903471 | 2.84E-15    |
| AF131216.5 | PEG3     | 0.660809808 | 2.00E-56    |
| AF131216.5 | FAHD2A   | 0.728457898 | 8.71E-74    |
| AF131216.5 | PTGDS    | 0.117332997 | 0.01389787  |
| AF131216.5 | CHCHD10  | 0.518594076 | 1.37E-31    |
| AF131216.5 | CD36     | 0.664499292 | 2.97E-57    |
| AF131216.5 | ANKRD37  | 0.661116887 | 1.71E-56    |
| AF131216.5 | TSPAN33  | 0.643138954 | 1.31E-52    |
| AF131216.5 | PRDM16   | 0.631650098 | 2.93E-50    |
| AF131216.5 | UST      | 0.670274924 | 1.41E-58    |
| AF131216.5 | NEXN     | 0.601852968 | 1.32E-44    |
| AF131216.5 | NUPR1L   | 0.314344871 | 1.59E-11    |
| AF131216.5 | SLC24A3  | 0.626272887 | 3.40E-49    |
| AF131216.5 | MARC1    | 0.725040034 | 8.73E-73    |
| AF131216.5 | MYH11    | 0.436697677 | 7.22E-22    |
| AF131216.5 | APOA1    | 0.708998991 | 2.79E-68    |
| AF131216.5 | TMEM178B | 0.578528604 | 1.40E-40    |
| AF131216.5 | CAPN6    | 0.335456977 | 5.25E-13    |

|            |          |             |             |
|------------|----------|-------------|-------------|
| AF131216.5 | PPM1L    | 0.715504425 | 4.53E-70    |
| AF131216.5 | FZD8     | 0.757254362 | 7.14E-83    |
| AF131216.5 | RCAN2    | 0.740882316 | 1.47E-77    |
| AF131216.5 | COPZ2    | 0.697684073 | 2.76E-65    |
| AF131216.5 | GAS1     | 0.29010852  | 5.83E-10    |
| AF131216.5 | DACT1    | 0.549913834 | 4.64E-36    |
| AF131216.5 | WBSCR17  | 0.717074852 | 1.65E-70    |
| AF131216.5 | NCS1     | 0.510878103 | 1.48E-30    |
| AF131216.5 | SPIRE2   | 0.60265038  | 9.47E-45    |
| AF131216.5 | C15orf52 | 0.454328817 | 9.58E-24    |
| AF131216.5 | SPAG5    | 0.608981165 | 6.63E-46    |
| AF131216.5 | ARL4D    | 0.590284966 | 1.44E-42    |
| AF131216.5 | FAM189A2 | 0.581216571 | 5.01E-41    |
| AF131216.5 | MAP1LC3A | 0.76675976  | 3.71E-86    |
| AF131216.5 | KLF6     | 0.084252749 | 0.077833967 |
| AF131216.5 | ADD3     | 0.439852432 | 3.39E-22    |
| AF131216.5 | TSPAN7   | 0.609945236 | 4.40E-46    |
| AF131216.5 | KLF9     | 0.449217268 | 3.44E-23    |
| AF131216.5 | KCNQ1    | 0.712662706 | 2.78E-69    |
| AF131216.5 | MAN1A1   | 0.180484688 | 0.000143498 |
| AF131216.5 | MLF1     | 0.405891372 | 7.68E-19    |
| AF131216.5 | RARB     | 0.676505147 | 4.88E-60    |
| AF131216.5 | CDC42EP2 | 0.606116894 | 2.22E-45    |
| AF131216.5 | FAM3B    | 0.280361573 | 2.26E-09    |
| AF131216.5 | GADD45B  | 0.296535613 | 2.32E-10    |
| AF131216.5 | TMEM47   | 0.612353783 | 1.57E-46    |
| AF131216.5 | SDF2L1   | 0.618423587 | 1.12E-47    |
| AF131216.5 | CCDC85A  | 0.340731826 | 2.14E-13    |
| AF131216.5 | CRYBG3   | 0.176903711 | 0.000195006 |
| AF131216.5 | FBLN2    | 0.131307418 | 0.005863997 |
| AF131216.5 | PEBP4    | 0.334550112 | 6.11E-13    |
| AF131216.5 | CDADC1   | 0.767329664 | 2.33E-86    |
| AF131216.5 | FAM63A   | 0.63150443  | 3.13E-50    |
| AF131216.5 | GLUL     | 0.374451194 | 4.64E-16    |
| AF131216.5 | FREM2    | 0.476352387 | 3.01E-26    |
| AF131216.5 | ACKR3    | 0.647121474 | 1.90E-53    |
| AF131216.5 | DENND6A  | 0.696825246 | 4.60E-65    |
| AF131216.5 | CLDN8    | 0.210219125 | 8.92E-06    |
| AF131216.5 | UTS2R    | 0.243812337 | 2.31E-07    |
| AF131216.5 | SCNN1B   | 0.519629775 | 9.94E-32    |
| AF131216.5 | TTC30A   | 0.653031001 | 1.03E-54    |
| AF131216.5 | CORO2B   | 0.706210507 | 1.57E-67    |
| AF131216.5 | TC2N     | 0.328441728 | 1.68E-12    |
| AF131216.5 | ALDH2    | 0.690598853 | 1.77E-63    |
| AF131216.5 | GPR183   | 0.029203964 | 0.541678591 |
| AF131216.5 | C4orf47  | 0.647359336 | 1.70E-53    |
| AF131216.5 | SLC25A42 | 0.786723704 | 1.36E-93    |
| AF131216.5 | LGMN     | 0.652991003 | 1.05E-54    |
| AF131216.5 | ACSF2    | 0.729950172 | 3.15E-74    |
| AF131216.5 | KIAA1467 | 0.665271456 | 1.98E-57    |
| AF131216.5 | PRKG1    | 0.70447186  | 4.58E-67    |

|            |          |              |             |
|------------|----------|--------------|-------------|
| AF131216.5 | GNAI1    | 0.673124444  | 3.06E-59    |
| AF131216.5 | ABCC4    | 0.38839895   | 2.95E-17    |
| AF131216.5 | PRPS1    | 0.705139065  | 3.04E-67    |
| AF131216.5 | TSPAN5   | 0.47872902   | 1.57E-26    |
| AF131216.5 | CR2      | 0.225956338  | 1.73E-06    |
| AF131216.5 | CCDC170  | 0.562304494  | 5.80E-38    |
| AF131216.5 | RRAD     | 0.085551557  | 0.073345027 |
| AF131216.5 | SCGB2A1  | 0.574473888  | 6.53E-40    |
| AF131216.5 | SESN3    | 0.282586581  | 1.67E-09    |
| AF131216.5 | SGK223   | 0.346257257  | 8.24E-14    |
| AF131216.5 | NDRG2    | 0.773578183  | 1.31E-88    |
| AF131216.5 | C3orf52  | 0.332888908  | 8.06E-13    |
| AF131216.5 | FLRT3    | -0.338684824 | 3.04E-13    |
| AF131216.5 | MST1R    | -0.67410511  | 1.80E-59    |
| AF131216.5 | SDC1     | -0.385222494 | 5.59E-17    |
| AF131216.5 | ST8SIA4  | -0.599527539 | 3.44E-44    |
| AF131216.5 | UBTD1    | -0.291404633 | 4.85E-10    |
| AF131216.5 | EPHA2    | -0.406955155 | 6.11E-19    |
| AF131216.5 | TMEM130  | -0.225871345 | 1.74E-06    |
| AF131216.5 | SPINK2   | -0.449727742 | 3.03E-23    |
| AF131216.5 | MMP16    | -0.584379127 | 1.47E-41    |
| AF131216.5 | SIGLEC15 | -0.582974224 | 2.54E-41    |
| AF131216.5 | RIN1     | -0.547629679 | 1.02E-35    |
| AF131216.5 | IL1RN    | -0.584565927 | 1.37E-41    |
| AF131216.5 | FCER1G   | -0.330100804 | 1.28E-12    |
| AF131216.5 | CD276    | -0.62221803  | 2.10E-48    |
| AF131216.5 | CTSB     | -0.502691513 | 1.72E-29    |
| AF131216.5 | FAM171A2 | -0.107802777 | 0.023891746 |
| AF131216.5 | ASPHD1   | -0.571140134 | 2.27E-39    |
| AF131216.5 | C15orf48 | -0.448658711 | 3.96E-23    |
| AF131216.5 | DYSF     | -0.112572497 | 0.018302776 |
| AF131216.5 | PDZRN4   | -0.127994514 | 0.007248869 |
| AF131216.5 | EFHD2    | -0.181023529 | 0.000136956 |
| AF131216.5 | ASF1B    | -0.401558939 | 1.93E-18    |
| AF131216.5 | AQP1     | -0.075812269 | 0.112694392 |
| AF131216.5 | ARRDC2   | -0.476780737 | 2.68E-26    |
| AF131216.5 | PRSS1    | -0.415345342 | 9.76E-20    |
| AF131216.5 | MAPK13   | -0.574069651 | 7.60E-40    |
| AF131216.5 | CST5     | -0.588019685 | 3.53E-42    |
| AF131216.5 | AHR      | -0.574104401 | 7.50E-40    |
| AF131216.5 | BAX      | -0.3988253   | 3.44E-18    |
| AF131216.5 | C1orf115 | -0.304203503 | 7.49E-11    |
| AF131216.5 | PLK3     | -0.437489415 | 5.98E-22    |
| AF131216.5 | JAG2     | -0.167883256 | 0.000411463 |
| AF131216.5 | RAD23B   | -0.571056734 | 2.34E-39    |
| AF131216.5 | CA12     | 0.231767114  | 9.14E-07    |
| AF131216.5 | ADTRP    | -0.354298605 | 1.98E-14    |
| AF131216.5 | UCP2     | -0.319289506 | 7.34E-12    |
| AF131216.5 | IGFBP2   | -0.27412128  | 5.24E-09    |
| AF131216.5 | LOXL2    | -0.233834541 | 7.26E-07    |
| AF131216.5 | GPX1     | -0.355480681 | 1.60E-14    |



|            |          |              |             |
|------------|----------|--------------|-------------|
| AF131216.5 | P3H3     | -0.448591622 | 4.02E-23    |
| AF131216.5 | C2orf81  | -0.345231203 | 9.86E-14    |
| AF131216.5 | CDT1     | -0.458449203 | 3.36E-24    |
| AF131216.5 | SNX25    | -0.2742278   | 5.17E-09    |
| AF131216.5 | MTHFD1L  | -0.586780581 | 5.75E-42    |
| AF131216.5 | CDC42BPG | -0.62052841  | 4.44E-48    |
| AF131216.5 | MSN      | -0.661077598 | 1.75E-56    |
| AF131216.5 | SIGLEC6  | -0.496428579 | 1.08E-28    |
| AF131216.5 | F2R      | -0.131442873 | 0.005812807 |
| AF131216.5 | TMEM184A | -0.550414521 | 3.90E-36    |
| AF131216.5 | CKS2     | -0.263452245 | 2.10E-08    |
| AF131216.5 | TAX1BP3  | -0.539676979 | 1.51E-34    |
| AF131216.5 | PMEPA1   | -0.483533348 | 4.19E-27    |
| AF131216.5 | CXCL16   | -0.64842085  | 1.01E-53    |
| AF131216.5 | FAXC     | -0.668875979 | 2.97E-58    |
| AF131216.5 | VTCN1    | -0.616913111 | 2.18E-47    |
| AF131216.5 | SH2D4A   | -0.551124135 | 3.05E-36    |
| AF131216.5 | RNF24    | -0.482454389 | 5.65E-27    |
| AF131216.5 | LY6G6C   | -0.592495717 | 5.96E-43    |
| AF131216.5 | NID1     | -0.318234517 | 8.67E-12    |
| AF131216.5 | STAC     | -0.740242911 | 2.33E-77    |
| AF131216.5 | RAB34    | -0.510871721 | 1.48E-30    |
| AF131216.5 | HES4     | -0.238264984 | 4.40E-07    |
| AF131216.5 | EPHA10   | -0.673827818 | 2.09E-59    |
| AF131216.5 | ENTPD2   | -0.491866031 | 4.01E-28    |
| AF131216.5 | DDB2     | -0.540541622 | 1.13E-34    |
| AF131216.5 | NKAIN4   | -0.297364229 | 2.06E-10    |
| AF131216.5 | TRIM29   | -0.494718388 | 1.77E-28    |
| AF131216.5 | ADCY8    | -0.643942775 | 8.90E-53    |
| AF131216.5 | SFTA2    | -0.441757738 | 2.14E-22    |
| AF131216.5 | NRIP1    | -0.557091248 | 3.75E-37    |
| AF131216.5 | VWA1     | 0.014087607  | 0.76849719  |
| AF131216.5 | APLNR    | -0.06030827  | 0.207256942 |
| AF131216.5 | REN      | -0.477761317 | 2.05E-26    |
| AF131216.5 | EDIL3    | -0.162140104 | 0.000649348 |
| AF131216.5 | AGRN     | -0.412230668 | 1.94E-19    |
| AF131216.5 | TREM1    | -0.488802762 | 9.57E-28    |
| AF131216.5 | SRL      | -0.316259001 | 1.18E-11    |
| AF131216.5 | RASGRF1  | -0.531183877 | 2.49E-33    |
| AF131216.5 | RMI2     | -0.475141093 | 4.18E-26    |
| AF131216.5 | SAMD1    | -0.445716713 | 8.17E-23    |
| AF131216.5 | MGAT4B   | -0.658124395 | 7.91E-56    |
| AF131216.5 | NXN      | -0.586761717 | 5.79E-42    |
| AF131216.5 | SH3BGRL3 | -0.510716266 | 1.55E-30    |
| AF131216.5 | CA11     | -0.292567561 | 4.11E-10    |
| AF131216.5 | PLD3     | -0.203491761 | 1.74E-05    |
| AF131216.5 | LURAP1L  | -0.545336163 | 2.24E-35    |
| AF131216.5 | CARNS1   | -0.21147751  | 7.86E-06    |
| AF131216.5 | PDLIM7   | -0.40522048  | 8.87E-19    |
| AF131216.5 | BCL2L1   | -0.656041224 | 2.27E-55    |
| AF131216.5 | GGT6     | -0.29842319  | 1.76E-10    |

|            |          |              |             |
|------------|----------|--------------|-------------|
| AF131216.5 | DPYSL3   | -0.339066367 | 2.85E-13    |
| AF131216.5 | FYN      | -0.553122345 | 1.52E-36    |
| AF131216.5 | TK1      | -0.35803915  | 1.01E-14    |
| AF131216.5 | AK1      | -0.205843998 | 1.38E-05    |
| AF131216.5 | HIGD1B   | 0.049630867  | 0.29947642  |
| AF131216.5 | TMEM59L  | -0.330846161 | 1.13E-12    |
| AF131216.5 | MEGF9    | -0.463840455 | 8.37E-25    |
| AF131216.5 | ZFP36L1  | -0.543210582 | 4.60E-35    |
| AF131216.5 | ADRA1B   | -0.290396025 | 5.60E-10    |
| AF131216.5 | EPHA4    | -0.556297099 | 4.96E-37    |
| AF131216.5 | TCERG1L  | -0.179354241 | 0.000158187 |
| AF131216.5 | NGFR     | -0.2582529   | 4.04E-08    |
| AF131216.5 | EBI3     | -0.546594689 | 1.45E-35    |
| AF131216.5 | S100A10  | -0.550714224 | 3.51E-36    |
| AF131216.5 | S100B    | -0.460522871 | 1.98E-24    |
| AF131216.5 | CD44     | -0.245025963 | 2.01E-07    |
| AF131216.5 | BHLHE41  | -0.495240067 | 1.52E-28    |
| AF131216.5 | FBX02    | -0.37456353  | 4.54E-16    |
| AF131216.5 | SLC30A2  | -0.471593731 | 1.08E-25    |
| AF131216.5 | FRMD5    | -0.651323417 | 2.41E-54    |
| AF131216.5 | SAMD11   | -0.31469212  | 1.51E-11    |
| AF131216.5 | SIPA1L2  | -0.480830063 | 8.85E-27    |
| AF131216.5 | S100A16  | -0.589527411 | 1.94E-42    |
| AF131216.5 | PPL      | -0.681308623 | 3.45E-61    |
| AF131216.5 | ARHGDIB  | -0.158997264 | 0.000828315 |
| AF131216.5 | CDC42EP3 | -0.639020979 | 9.35E-52    |
| AF131216.5 | RUNX2    | -0.539902926 | 1.40E-34    |
| AF131216.5 | LAMC2    | -0.644435777 | 7.02E-53    |
| AF131216.5 | BRINP1   | -0.553837633 | 1.18E-36    |
| AF131216.5 | GPRC5B   | -0.502890086 | 1.62E-29    |
| AF131216.5 | AQP5     | -0.096223712 | 0.04390042  |
| AF131216.5 | PLAG1    | -0.398561624 | 3.64E-18    |
| AF131216.5 | PTPRU    | -0.628720014 | 1.12E-49    |
| AF131216.5 | ANGPTL4  | -0.441389244 | 2.34E-22    |
| AF131216.5 | PALM3    | -0.348266814 | 5.79E-14    |
| AF131216.5 | ACP5     | -0.390289789 | 2.01E-17    |
| AF131216.5 | DLG4     | -0.278221667 | 3.02E-09    |
| AF131216.5 | ETNK2    | -0.480102577 | 1.08E-26    |
| AF131216.5 | CD109    | -0.553180924 | 1.49E-36    |
| AF131216.5 | SNX22    | -0.344669809 | 1.09E-13    |
| AF131216.5 | TMEM98   | -0.550503028 | 3.78E-36    |
| AF131216.5 | CTHRC1   | -0.393894737 | 9.59E-18    |
| AF131216.5 | S100A2   | -0.511022778 | 1.41E-30    |
| AF131216.5 | C11orf80 | -0.639223382 | 8.50E-52    |
| AF131216.5 | SREBF1   | -0.511839054 | 1.10E-30    |
| AF131216.5 | PRSS22   | -0.605538196 | 2.84E-45    |
| AF131216.5 | CMTM3    | -0.500368353 | 3.42E-29    |
| AF131216.5 | RDH5     | -0.475572138 | 3.72E-26    |
| AF131216.5 | MYH10    | -0.575967156 | 3.71E-40    |
| AF131216.5 | EVPL     | -0.507183656 | 4.51E-30    |
| AF131216.5 | SCD      | -0.528002598 | 6.97E-33    |

|            |          |              |             |
|------------|----------|--------------|-------------|
| AF131216.5 | CD151    | -0.441768943 | 2.14E-22    |
| AF131216.5 | S100A4   | -0.508644443 | 2.91E-30    |
| AF131216.5 | BNIP1    | -0.367157473 | 1.86E-15    |
| AF131216.5 | MAP3K6   | -0.608287579 | 8.90E-46    |
| AF131216.5 | MANEAL   | -0.464059027 | 7.91E-25    |
| AF131216.5 | CD207    | -0.444419071 | 1.12E-22    |
| AF131216.5 | CD1A     | -0.47334748  | 6.77E-26    |
| AF131216.5 | C3       | -0.480328099 | 1.02E-26    |
| AF131216.5 | NT5E     | -0.546868861 | 1.32E-35    |
| AF131216.5 | CACNG4   | -0.553586121 | 1.29E-36    |
| AF131216.5 | FHOD1    | -0.481669884 | 7.02E-27    |
| AF131216.5 | LEMD1    | -0.665070614 | 2.20E-57    |
| AF131216.5 | ATP11A   | -0.293049667 | 3.84E-10    |
| AF131216.5 | PPAP2C   | -0.36793758  | 1.61E-15    |
| AF131216.5 | DRAM1    | -0.595307724 | 1.92E-43    |
| AF131216.5 | CDA      | -0.167208676 | 0.000434449 |
| AF131216.5 | CCND2    | -0.277076611 | 3.53E-09    |
| AF131216.5 | LCN6     | -0.205094464 | 1.48E-05    |
| AF131216.5 | CDH4     | -0.466961453 | 3.70E-25    |
| AF131216.5 | MMP11    | -0.500140136 | 3.65E-29    |
| AF131216.5 | B3GAT1   | -0.378804053 | 1.99E-16    |
| AF131216.5 | SPP1     | -0.31646112  | 1.15E-11    |
| AF131216.5 | HLA-DQB1 | -0.419775584 | 3.63E-20    |
| AF131216.5 | SDC3     | -0.56819076  | 6.77E-39    |
| AF131216.5 | CX3CL1   | -0.409481569 | 3.54E-19    |
| AF131216.5 | SDK1     | -0.433282508 | 1.62E-21    |
| AF131216.5 | DOCK9    | -0.595984716 | 1.46E-43    |
| AF131216.5 | CSF2     | -0.611155901 | 2.63E-46    |
| AF131216.5 | GRHL3    | -0.635878281 | 4.11E-51    |
| AF131216.5 | TMEM92   | -0.709926773 | 1.56E-68    |
| AF131216.5 | BASP1    | -0.615999155 | 3.25E-47    |
| AF131216.5 | HRH1     | -0.610975262 | 2.84E-46    |
| AF131216.5 | ESM1     | 0.043558085  | 0.362572927 |
| AF131216.5 | B4GALNT3 | -0.618761586 | 9.69E-48    |
| AF131216.5 | LMO3     | -0.263568694 | 2.07E-08    |
| AF131216.5 | C9orf16  | -0.500768477 | 3.04E-29    |
| AF131216.5 | SEMA3F   | -0.214644462 | 5.69E-06    |
| AF131216.5 | PLA2G12B | -0.263734842 | 2.03E-08    |
| AF131216.5 | KLK6     | -0.494460337 | 1.90E-28    |
| AF131216.5 | ST3GAL5  | -0.387070923 | 3.85E-17    |
| AF131216.5 | FAM132B  | -0.15322773  | 0.001280291 |
| AF131216.5 | CDKN1A   | -0.294414146 | 3.15E-10    |
| AF131216.5 | E2F1     | -0.460741726 | 1.87E-24    |
| AF131216.5 | B3GNT8   | -0.411091427 | 2.49E-19    |
| AF131216.5 | MTMR11   | -0.629937265 | 6.43E-50    |
| AF131216.5 | MYO1G    | -0.521356366 | 5.78E-32    |
| AF131216.5 | TMSB10   | -0.505940164 | 6.55E-30    |
| AF131216.5 | UNC5CL   | -0.676779319 | 4.20E-60    |
| AF131216.5 | ABR      | -0.576830664 | 2.68E-40    |
| AF131216.5 | PLP2     | -0.599312087 | 3.76E-44    |
| AF131216.5 | SRCIN1   | -0.505544012 | 7.38E-30    |

|            |          |              |             |
|------------|----------|--------------|-------------|
| AF131216.5 | PDE9A    | -0.654920422 | 4.00E-55    |
| AF131216.5 | TREM2    | -0.306633893 | 5.20E-11    |
| AF131216.5 | KDELR3   | -0.419448081 | 3.91E-20    |
| AF131216.5 | PC       | -0.546231017 | 1.65E-35    |
| AF131216.5 | C2CD4A   | -0.676407988 | 5.15E-60    |
| AF131216.5 | PELI1    | -0.573540312 | 9.27E-40    |
| AF131216.5 | SSX1     | -0.298826293 | 1.66E-10    |
| AF131216.5 | MROH6    | -0.595110995 | 2.08E-43    |
| AF131216.5 | ESPN     | -0.492874214 | 3.00E-28    |
| AF131216.5 | BMP1     | -0.414228594 | 1.25E-19    |
| AF131216.5 | TM4SF4   | -0.526941742 | 9.80E-33    |
| AF131216.5 | CORO2A   | -0.583927232 | 1.75E-41    |
| AF131216.5 | CD164L2  | -0.483954127 | 3.73E-27    |
| AF131216.5 | CTSS     | -0.495371267 | 1.46E-28    |
| AF131216.5 | CLU      | -0.507866179 | 3.68E-30    |
| AF131216.5 | TMSB4X   | -0.520461228 | 7.66E-32    |
| AF131216.5 | WNT10A   | -0.566387314 | 1.31E-38    |
| AF131216.5 | NAPSA    | -0.416261413 | 7.96E-20    |
| AF131216.5 | PLEKHA4  | -0.52246114  | 4.08E-32    |
| AF131216.5 | SFTPA1   | -0.063684629 | 0.182896635 |
| AF131216.5 | C1orf116 | -0.607908163 | 1.05E-45    |
| AF131216.5 | TM4SF1   | -0.505188708 | 8.20E-30    |
| AF131216.5 | SEL1L3   | -0.523710447 | 2.75E-32    |
| AF131216.5 | VASN     | -0.627683605 | 1.80E-49    |
| AF131216.5 | NPTXR    | -0.690701969 | 1.66E-63    |
| AF131216.5 | PDE4C    | -0.57331167  | 1.01E-39    |
| AF131216.5 | CDC42EP1 | -0.611590271 | 2.18E-46    |
| AF131216.5 | ENDOD1   | -0.706028104 | 1.76E-67    |
| AF131216.5 | RYR1     | -0.535123562 | 6.86E-34    |
| AF131216.5 | IL1RAP   | -0.603905077 | 5.62E-45    |
| AF131216.5 | SLC35F2  | -0.65739133  | 1.15E-55    |
| AF131216.5 | ISYNA1   | -0.334420047 | 6.24E-13    |
| AF131216.5 | HLA-G    | -0.56069336  | 1.04E-37    |
| AF131216.5 | CDKN2B   | -0.563677342 | 3.53E-38    |
| AF131216.5 | ALDH1A3  | -0.489127145 | 8.73E-28    |
| AF131216.5 | CLIP3    | -0.457656188 | 4.12E-24    |
| AF131216.5 | ULBP2    | -0.395337368 | 7.12E-18    |
| AF131216.5 | ETHE1    | -0.700103258 | 6.49E-66    |
| AF131216.5 | XPR1     | -0.554139889 | 1.06E-36    |
| AF131216.5 | SPTBN2   | -0.694301243 | 2.04E-64    |
| AF131216.5 | IVL      | -0.606187258 | 2.16E-45    |
| AF131216.5 | MARCO    | -0.508552957 | 2.99E-30    |
| AF131216.5 | PLXND1   | -0.248909764 | 1.27E-07    |
| AF131216.5 | EMILIN2  | -0.460497198 | 1.99E-24    |
| AF131216.5 | PLAUR    | -0.564133776 | 2.99E-38    |
| AF131216.5 | CDC42EP5 | -0.549960498 | 4.56E-36    |
| AF131216.5 | TRPC5    | -0.307318323 | 4.69E-11    |
| AF131216.5 | TMEM100  | -0.426819104 | 7.30E-21    |
| AF131216.5 | QSOX1    | -0.644895331 | 5.62E-53    |
| AF131216.5 | ARHGAP23 | -0.512876313 | 8.03E-31    |
| AF131216.5 | MDFI     | -0.308417502 | 3.97E-11    |

|            |           |              |             |
|------------|-----------|--------------|-------------|
| AF131216.5 | FSTL3     | -0.625711635 | 4.39E-49    |
| AF131216.5 | INF2      | -0.483057766 | 4.78E-27    |
| AF131216.5 | TGFBR1    | -0.628327407 | 1.34E-49    |
| AF131216.5 | TGFBI     | -0.328704128 | 1.61E-12    |
| AF131216.5 | ERBB3     | -0.736064513 | 4.53E-76    |
| AF131216.5 | CCL18     | -0.374955286 | 4.21E-16    |
| AF131216.5 | CCL17     | -0.513258584 | 7.15E-31    |
| AF131216.5 | C16orf45  | -0.376355082 | 3.21E-16    |
| AF131216.5 | PRDM1     | -0.339532304 | 2.63E-13    |
| AF131216.5 | TRIM47    | -0.614780627 | 5.51E-47    |
| AF131216.5 | CNFN      | -0.446876095 | 6.14E-23    |
| AF131216.5 | ARMCX3    | -0.408764012 | 4.13E-19    |
| AF131216.5 | RAMP1     | -0.333400517 | 7.40E-13    |
| AF131216.5 | GABRD     | 0.033621075  | 0.482286381 |
| AF131216.5 | COL13A1   | -0.174873445 | 0.000231439 |
| AF131216.5 | S100A5    | -0.456001084 | 6.28E-24    |
| AF131216.5 | MISP      | -0.548013917 | 8.93E-36    |
| AF131216.5 | HES6      | -0.212489947 | 7.09E-06    |
| AF131216.5 | PSD3      | -0.608753799 | 7.31E-46    |
| AF131216.5 | DOK7      | -0.598404609 | 5.45E-44    |
| AF131216.5 | ZMAT3     | -0.59018412  | 1.50E-42    |
| AF131216.5 | MFAP2     | -0.403865362 | 1.18E-18    |
| AF131216.5 | TMEM79    | -0.590431626 | 1.36E-42    |
| AF131216.5 | SLC1A5    | -0.502243589 | 1.97E-29    |
| AF131216.5 | BBC3      | -0.476668544 | 2.76E-26    |
| AF131216.5 | HLA-DQB2  | -0.46067719  | 1.90E-24    |
| AF131216.5 | C1QL1     | -0.428048412 | 5.50E-21    |
| AF131216.5 | TMEM215   | -0.161883624 | 0.000662486 |
| AF131216.5 | PNP       | -0.483409098 | 4.34E-27    |
| AF131216.5 | ARNTL     | -0.540664169 | 1.09E-34    |
| AF131216.5 | CLDN2     | -0.336469047 | 4.42E-13    |
| AF131216.5 | MVP       | -0.682821606 | 1.48E-61    |
| AF131216.5 | LGALS1    | -0.486916604 | 1.63E-27    |
| AF131216.5 | BIRC7     | -0.497453231 | 8.01E-29    |
| AF131216.5 | COL8A1    | -0.651440008 | 2.27E-54    |
| AF131216.5 | PERP      | -0.688871269 | 4.78E-63    |
| AF131216.5 | GJA4      | -0.152690875 | 0.001332235 |
| AF131216.5 | IGFL2     | -0.499507525 | 4.40E-29    |
| AF131216.5 | DAPK2     | -0.495290704 | 1.50E-28    |
| AF131216.5 | MAMLD1    | -0.602934765 | 8.41E-45    |
| AF131216.5 | ETV5      | -0.294576125 | 3.08E-10    |
| AF131216.5 | RUNX1     | -0.73373029  | 2.32E-75    |
| AF131216.5 | LONRF2    | -0.328220319 | 1.74E-12    |
| AF131216.5 | SPOCK1    | -0.159700637 | 0.000784697 |
| AF131216.5 | XKRX      | -0.487608772 | 1.34E-27    |
| AF131216.5 | TGFBI     | -0.261103838 | 2.83E-08    |
| AF131216.5 | ERP27     | -0.247839599 | 1.44E-07    |
| AF131216.5 | TNFRSF10C | -0.452080547 | 1.69E-23    |
| AF131216.5 | PALM      | -0.591058124 | 1.06E-42    |
| AF131216.5 | TSC22D1   | -0.379635505 | 1.69E-16    |
| AF131216.5 | TGM2      | -0.590184261 | 1.50E-42    |

|            |          |              |          |
|------------|----------|--------------|----------|
| AF131216.5 | UBE2QL1  | -0.26645183  | 1.43E-08 |
| AF131216.5 | ECE1     | -0.577767644 | 1.88E-40 |
| AF131216.5 | COL8A2   | -0.645265385 | 4.70E-53 |
| AF131216.5 | HIST3H2A | -0.464988206 | 6.20E-25 |
| AF131216.5 | TNFRSF21 | -0.576368557 | 3.19E-40 |
| AF131216.5 | SOX4     | -0.624901033 | 6.32E-49 |
| AF131216.5 | ELF3     | -0.732471196 | 5.56E-75 |
| AF131216.5 | TPD52L1  | -0.560059061 | 1.30E-37 |
| AF131216.5 | INHBB    | -0.429973717 | 3.52E-21 |
| AF131216.5 | HPN      | -0.449418678 | 3.28E-23 |
| AF131216.5 | MMP7     | -0.512273244 | 9.66E-31 |
| AF131216.5 | RAB27A   | -0.5912323   | 9.87E-43 |
| AF131216.5 | IGF2BP2  | -0.589515922 | 1.95E-42 |
| AF131216.5 | ITGB4    | -0.594537687 | 2.62E-43 |
| AF131216.5 | PPP1R1B  | -0.542127935 | 6.64E-35 |
| AF131216.5 | NPDC1    | -0.272044775 | 6.90E-09 |
| AF131216.5 | CCL13    | -0.587165241 | 4.94E-42 |
| AF131216.5 | SPINT1   | -0.737271694 | 1.93E-76 |
| AF131216.5 | HEY2     | -0.295662886 | 2.63E-10 |
| AF131216.5 | CST2     | -0.541478055 | 8.26E-35 |
| AF131216.5 | ADM      | -0.3684238   | 1.47E-15 |
| AF131216.5 | VSTM2L   | -0.470537324 | 1.44E-25 |
| AF131216.5 | FAM84A   | -0.541879577 | 7.22E-35 |
| AF131216.5 | P4HA2    | -0.48474365  | 2.99E-27 |
| AF131216.5 | LPL      | -0.336813417 | 4.17E-13 |
| AF131216.5 | TMEM173  | -0.498555525 | 5.81E-29 |
| AF131216.5 | DHRS3    | -0.536610021 | 4.20E-34 |
| AF131216.5 | SCN1B    | -0.592426007 | 6.12E-43 |
| AF131216.5 | GLT1D1   | -0.291421228 | 4.84E-10 |
| AF131216.5 | PHYHIP   | -0.554355199 | 9.85E-37 |
| AF131216.5 | BHLHE40  | -0.622384406 | 1.95E-48 |
| AF131216.5 | BID      | -0.581711159 | 4.14E-41 |
| AF131216.5 | POSTN    | -0.392651812 | 1.24E-17 |
| AF131216.5 | ITGA3    | -0.760731372 | 4.68E-84 |
| AF131216.5 | RSPO4    | -0.576928958 | 2.58E-40 |
| AF131216.5 | ADAMTS9  | -0.219660979 | 3.38E-06 |
| AF131216.5 | ABTB2    | -0.734876055 | 1.04E-75 |
| AF131216.5 | KCNQ3    | -0.750993928 | 8.60E-81 |
| AF131216.5 | ANXA1    | -0.533729297 | 1.08E-33 |
| AF131216.5 | S100A11  | -0.634997185 | 6.20E-51 |
| AF131216.5 | CEACAM6  | -0.611720244 | 2.06E-46 |
| AF131216.5 | IER5L    | -0.571047514 | 2.35E-39 |
| AF131216.5 | KRT80    | -0.652433439 | 1.39E-54 |
| AF131216.5 | CDH6     | -0.56339551  | 3.91E-38 |
| AF131216.5 | UNC5B    | -0.45992928  | 2.30E-24 |
| AF131216.5 | PLEKHN1  | -0.651111086 | 2.68E-54 |
| AF131216.5 | SYTL1    | -0.401273845 | 2.05E-18 |
| AF131216.5 | TMEM163  | -0.507483217 | 4.12E-30 |
| AF131216.5 | C4orf48  | -0.189576061 | 6.41E-05 |
| AF131216.5 | B3GNT7   | -0.401484332 | 1.96E-18 |
| AF131216.5 | BAIAP3   | -0.527761332 | 7.53E-33 |

|            |            |              |             |
|------------|------------|--------------|-------------|
| AF131216.5 | PHLDA2     | -0.517209172 | 2.11E-31    |
| AF131216.5 | GAP43      | -0.56430383  | 2.81E-38    |
| AF131216.5 | S100A1     | -0.495294675 | 1.50E-28    |
| AF131216.5 | PTPRE      | -0.721737626 | 7.84E-72    |
| AF131216.5 | CCND1      | -0.529332753 | 4.54E-33    |
| AF131216.5 | ST6GALNAC5 | -0.70372842  | 7.22E-67    |
| AF131216.5 | KRT17      | -0.268373589 | 1.12E-08    |
| AF131216.5 | HPCAL4     | -0.37939736  | 1.77E-16    |
| AF131216.5 | GABBR2     | -0.312271517 | 2.20E-11    |
| AF131216.5 | DIRAS3     | -0.379785853 | 1.64E-16    |
| AF131216.5 | SERINC2    | -0.480593619 | 9.44E-27    |
| AF131216.5 | PTCHD4     | -0.419942102 | 3.49E-20    |
| AF131216.5 | EPS8       | -0.489418621 | 8.04E-28    |
| AF131216.5 | LY6E       | -0.562481933 | 5.44E-38    |
| AF131216.5 | UPP1       | -0.664579288 | 2.84E-57    |
| AF131216.5 | AHNAK2     | -0.723886893 | 1.89E-72    |
| AF131216.5 | PLXNC1     | -0.489433514 | 8.00E-28    |
| AF131216.5 | TNC        | -0.573395354 | 9.79E-40    |
| AF131216.5 | DUSP4      | -0.50868898  | 2.87E-30    |
| AF131216.5 | NRCAM      | -0.522946934 | 3.50E-32    |
| AF131216.5 | NRP2       | -0.498691121 | 5.58E-29    |
| AF131216.5 | CTSC       | -0.593130515 | 4.62E-43    |
| AF131216.5 | AMIGO2     | -0.396924391 | 5.12E-18    |
| AF131216.5 | NAB2       | -0.466358359 | 4.33E-25    |
| AF131216.5 | TBC1D2     | -0.715772072 | 3.81E-70    |
| AF131216.5 | PHLDA3     | -0.515760725 | 3.31E-31    |
| AF131216.5 | PTP4A3     | -0.428684129 | 4.74E-21    |
| AF131216.5 | CRABP2     | -0.350136661 | 4.16E-14    |
| AF131216.5 | GOS2       | -0.415477475 | 9.48E-20    |
| AF131216.5 | S100A6     | -0.674721679 | 1.29E-59    |
| AF131216.5 | FOXQ1      | -0.591557393 | 8.67E-43    |
| AF131216.5 | LRG1       | -0.573814201 | 8.36E-40    |
| AF131216.5 | LAMP5      | -0.400518984 | 2.41E-18    |
| AF131216.5 | ALDH3B1    | -0.656065478 | 2.25E-55    |
| AF131216.5 | CDH2       | 0.017993819  | 0.706940757 |
| AF131216.5 | SCG5       | -0.201339516 | 2.14E-05    |
| AF131216.5 | ZCCHC16    | -0.298770024 | 1.67E-10    |
| AF131216.5 | GRB7       | -0.695439633 | 1.04E-64    |
| AF131216.5 | TIAM1      | -0.433068617 | 1.70E-21    |
| AF131216.5 | FXYD5      | -0.378265211 | 2.21E-16    |
| AF131216.5 | CLDN9      | -0.463909672 | 8.22E-25    |
| AF131216.5 | FAM43A     | -0.596627808 | 1.12E-43    |
| AF131216.5 | CHST2      | -0.491929291 | 3.93E-28    |
| AF131216.5 | HMGA2      | -0.500934427 | 2.89E-29    |
| AF131216.5 | GALNT7     | -0.58848306  | 2.94E-42    |
| AF131216.5 | CBLN1      | -0.46790127  | 2.89E-25    |
| AF131216.5 | STRA6      | -0.573686973 | 8.77E-40    |
| AF131216.5 | MUC21      | -0.655940473 | 2.39E-55    |
| AF131216.5 | PRR36      | -0.575292859 | 4.79E-40    |
| AF131216.5 | NFE2L3     | -0.562656252 | 5.11E-38    |
| AF131216.5 | NR1D1      | -0.462218115 | 1.28E-24    |

|            |          |              |             |
|------------|----------|--------------|-------------|
| AF131216.5 | MUC1     | -0.721450404 | 9.47E-72    |
| AF131216.5 | NAT8L    | -0.203726786 | 1.70E-05    |
| AF131216.5 | APOC1    | -0.188868858 | 6.84E-05    |
| AF131216.5 | EVA1A    | -0.699449953 | 9.61E-66    |
| AF131216.5 | ENTPD1   | -0.301377812 | 1.14E-10    |
| AF131216.5 | COL1A1   | -0.475480227 | 3.81E-26    |
| AF131216.5 | FNDC4    | -0.435294051 | 1.01E-21    |
| AF131216.5 | FRMD3    | -0.139030482 | 0.003512745 |
| AF131216.5 | SHROOM4  | -0.580280442 | 7.18E-41    |
| AF131216.5 | NELL2    | -0.353014832 | 2.49E-14    |
| AF131216.5 | EPHB3    | -0.700991162 | 3.80E-66    |
| AF131216.5 | TMC6     | -0.663988676 | 3.87E-57    |
| AF131216.5 | NOD1     | -0.570167837 | 3.26E-39    |
| AF131216.5 | GGCT     | -0.626230194 | 3.47E-49    |
| AF131216.5 | ICAM1    | -0.639763074 | 6.58E-52    |
| AF131216.5 | PRSS23   | -0.525285555 | 1.66E-32    |
| AF131216.5 | CFI      | -0.547986684 | 9.02E-36    |
| AF131216.5 | CD55     | -0.707595269 | 6.67E-68    |
| AF131216.5 | RASD2    | -0.524118939 | 2.41E-32    |
| AF131216.5 | KLK11    | -0.391344228 | 1.62E-17    |
| AF131216.5 | ICAM5    | -0.503722106 | 1.27E-29    |
| AF131216.5 | ADORA1   | -0.531683855 | 2.12E-33    |
| AF131216.5 | ITGA2    | -0.632981528 | 1.58E-50    |
| AF131216.5 | ABCC3    | -0.492176656 | 3.67E-28    |
| AF131216.5 | MFGE8    | -0.602089695 | 1.19E-44    |
| AF131216.5 | STK32A   | -0.341778305 | 1.79E-13    |
| AF131216.5 | CYSLTR2  | -0.383712631 | 7.55E-17    |
| AF131216.5 | LAD1     | -0.69964654  | 8.54E-66    |
| AF131216.5 | MGAT3    | -0.631493651 | 3.15E-50    |
| AF131216.5 | IGFBP6   | -0.448685802 | 3.93E-23    |
| AF131216.5 | CYP2S1   | -0.680969773 | 4.16E-61    |
| AF131216.5 | KCNJ2    | -0.478801216 | 1.54E-26    |
| AF131216.5 | FAM20A   | -0.552162245 | 2.12E-36    |
| AF131216.5 | TGFA     | -0.498863312 | 5.31E-29    |
| AF131216.5 | MXRA8    | -0.593432062 | 4.09E-43    |
| AF131216.5 | C8orf4   | -0.463448416 | 9.27E-25    |
| AF131216.5 | CLDN10   | -0.611198028 | 2.58E-46    |
| AF131216.5 | PDE5A    | -0.628578602 | 1.20E-49    |
| AF131216.5 | APOE     | -0.18205242  | 0.000125234 |
| AF131216.5 | SPOCK2   | -0.600968326 | 1.90E-44    |
| AF131216.5 | TENM1    | -0.230132292 | 1.10E-06    |
| AF131216.5 | SLIT1    | -0.215374076 | 5.28E-06    |
| AF131216.5 | CXCL14   | -0.291841493 | 4.56E-10    |
| AF131216.5 | ECM1     | -0.139143243 | 0.0034859   |
| AF131216.5 | DUSP5    | -0.674370063 | 1.56E-59    |
| AF131216.5 | SEZ6L2   | -0.475724188 | 3.57E-26    |
| AF131216.5 | THRSP    | -0.159372283 | 0.000804788 |
| AF131216.5 | C19orf33 | -0.627134693 | 2.31E-49    |
| AF131216.5 | MPZL2    | -0.603214043 | 7.49E-45    |
| AF131216.5 | CTSH     | -0.592377073 | 6.25E-43    |
| AF131216.5 | CYP11B1  | -0.651547095 | 2.16E-54    |



|            |           |              |          |
|------------|-----------|--------------|----------|
| AF131216.5 | ALOX5     | -0.64529971  | 4.62E-53 |
| AF131216.5 | SYTL5     | -0.567156287 | 9.91E-39 |
| AF131216.5 | TNFRSF12A | -0.511129156 | 1.37E-30 |
| AF131216.5 | DUSP6     | -0.509003434 | 2.61E-30 |
| AF131216.5 | ALOX15B   | -0.649901777 | 4.87E-54 |
| AF131216.5 | SDC4      | -0.632643955 | 1.85E-50 |
| AF131216.5 | MDK       | -0.474154895 | 5.45E-26 |
| AF131216.5 | KRT19     | -0.70132136  | 3.11E-66 |
| AF131216.5 | MET       | -0.745416017 | 5.46E-79 |
| AF131216.5 | TESC      | -0.227803884 | 1.41E-06 |
| AF131216.5 | CXCL17    | -0.714387832 | 9.26E-70 |
| AF131216.5 | NPC2      | -0.438390085 | 4.82E-22 |
| AF131216.5 | COMP      | -0.460472093 | 2.00E-24 |
| AF131216.5 | TUSC3     | -0.470190247 | 1.57E-25 |
| AF131216.5 | TMPRSS4   | -0.726758823 | 2.75E-73 |
| AF131216.5 | LGALS3    | -0.679212829 | 1.10E-60 |
| AF131216.5 | CRLF1     | -0.406220578 | 7.15E-19 |
| AF131216.5 | CTXN1     | -0.532781963 | 1.48E-33 |
| AF131216.5 | PCSK1N    | -0.212503706 | 7.08E-06 |
| AF131216.5 | NMU       | -0.547417851 | 1.10E-35 |
| AF131216.5 | GALE      | -0.585369296 | 9.99E-42 |
| AF131216.5 | PCSK2     | -0.196384131 | 3.42E-05 |
| AF131216.5 | GJB3      | -0.572874101 | 1.19E-39 |
| AF131216.5 | SLPI      | -0.612969926 | 1.20E-46 |
| AF131216.5 | AGR2      | -0.277065973 | 3.53E-09 |
| AF131216.5 | MRC2      | -0.528503569 | 5.93E-33 |
| AF131216.5 | GOLT1A    | -0.485132143 | 2.68E-27 |
| AF131216.5 | SLC27A6   | -0.609856539 | 4.57E-46 |
| AF131216.5 | KCNN4     | -0.685790554 | 2.77E-62 |
| AF131216.5 | ETV4      | -0.448024287 | 4.63E-23 |
| AF131216.5 | SYT12     | -0.688897368 | 4.71E-63 |
| AF131216.5 | PVRL4     | -0.747688541 | 1.02E-79 |
| AF131216.5 | PLCD3     | -0.662814543 | 7.12E-57 |
| AF131216.5 | PLAU      | -0.587156877 | 4.96E-42 |
| AF131216.5 | LRRK2     | -0.273177066 | 5.94E-09 |
| AF131216.5 | SFN       | -0.644568253 | 6.58E-53 |
| AF131216.5 | LPAR5     | -0.633293855 | 1.37E-50 |
| AF131216.5 | NGEF      | -0.644674206 | 6.25E-53 |
| AF131216.5 | DTX4      | -0.617249454 | 1.88E-47 |
| AF131216.5 | CST6      | -0.540467299 | 1.16E-34 |
| AF131216.5 | QPCT      | -0.484893147 | 2.87E-27 |
| AF131216.5 | TIMP1     | -0.572569859 | 1.33E-39 |
| AF131216.5 | CAMK2N1   | -0.64883842  | 8.22E-54 |
| AF131216.5 | KLHDC8A   | -0.189229552 | 6.62E-05 |
| AF131216.5 | PDLIM4    | -0.715859019 | 3.61E-70 |
| AF131216.5 | SCEL      | -0.60253308  | 9.94E-45 |
| AF131216.5 | LCN2      | -0.710821794 | 8.88E-69 |
| AF131216.5 | PROS1     | -0.750426577 | 1.32E-80 |
| AF131216.5 | GABRB2    | -0.67783218  | 2.36E-60 |
| AF131216.5 | TMPRSS6   | -0.718425573 | 6.86E-71 |
| AF131216.5 | KLK7      | -0.562752543 | 4.93E-38 |

|               |          |              |          |
|---------------|----------|--------------|----------|
| AF131216.5    | PDZK1IP1 | -0.601268597 | 1.68E-44 |
| AF131216.5    | CDH3     | -0.541975317 | 6.99E-35 |
| AF131216.5    | LRP4     | -0.327533541 | 1.95E-12 |
| AF131216.5    | IGSF1    | -0.283308961 | 1.51E-09 |
| AF131216.5    | B3GNT3   | -0.733907445 | 2.05E-75 |
| AF131216.5    | CLDN1    | -0.648519143 | 9.61E-54 |
| AF131216.5    | GDF15    | -0.656309155 | 1.99E-55 |
| AF131216.5    | ARHGAP36 | -0.251680784 | 9.07E-08 |
| AF131216.5    | LAMB3    | -0.67383647  | 2.08E-59 |
| AF131216.5    | KLK10    | -0.56917171  | 4.72E-39 |
| AF131216.5    | DPP4     | -0.636848309 | 2.61E-51 |
| AF131216.5    | METTL7B  | -0.486835047 | 1.67E-27 |
| AF131216.5    | LIPH     | -0.696013367 | 7.44E-65 |
| AF131216.5    | CLDN16   | -0.580731202 | 6.03E-41 |
| AF131216.5    | CHI3L1   | -0.637763871 | 1.69E-51 |
| AF131216.5    | SLC22A31 | -0.549887505 | 4.68E-36 |
| AF131216.5    | TACSTD2  | -0.659518376 | 3.89E-56 |
| AF131216.5    | SFTPB    | -0.639351177 | 8.00E-52 |
| AF131216.5    | RXRG     | -0.377881824 | 2.38E-16 |
| AF131216.5    | DCSTAMP  | -0.692133545 | 7.25E-64 |
| AF131216.5    | CITED1   | -0.446567172 | 6.63E-23 |
| AF131216.5    | SERPINA1 | -0.72532995  | 7.19E-73 |
| AF131216.5    | PRR15    | -0.373945968 | 5.11E-16 |
| AF131216.5    | SLC34A2  | -0.769500206 | 3.92E-87 |
| AF131216.5    | FN1      | -0.801610567 | 1.11E-99 |
| AF131216.5    | ZCCHC12  | -0.327617509 | 1.92E-12 |
| RP11-760H22.2 | TFF3     | 0.731894632  | 0        |
| RP11-760H22.2 | CCL21    | 0.397083757  | 4.95E-18 |
| RP11-760H22.2 | TPO      | 0.707884726  | 0        |
| RP11-760H22.2 | MT1G     | 0.583884181  | 0        |
| RP11-760H22.2 | DIO1     | 0.675615644  | 0        |
| RP11-760H22.2 | DPT      | 0.30523092   | 6.42E-11 |
| RP11-760H22.2 | CDH16    | 0.684166721  | 0        |
| RP11-760H22.2 | CRABP1   | 0.53995647   | 1.38E-34 |
| RP11-760H22.2 | SLC26A7  | 0.686476681  | 0        |
| RP11-760H22.2 | MT1H     | 0.52473803   | 1.98E-32 |
| RP11-760H22.2 | SLC26A4  | 0.59249483   | 0        |
| RP11-760H22.2 | SLC5A8   | 0.665604563  | 1.66E-57 |
| RP11-760H22.2 | PKHD1L1  | 0.709462278  | 2.09E-68 |
| RP11-760H22.2 | TFCP2L1  | 0.67345433   | 0        |
| RP11-760H22.2 | WSCD2    | 0.696690752  | 4.98E-65 |
| RP11-760H22.2 | IPCEF1   | 0.651743888  | 0        |
| RP11-760H22.2 | SLC5A5   | 0.560628965  | 1.06E-37 |
| RP11-760H22.2 | MT1F     | 0.633195704  | 0        |
| RP11-760H22.2 | FOSB     | 0.467996153  | 0        |
| RP11-760H22.2 | SEMA3D   | 0.707872624  | 5.62E-68 |
| RP11-760H22.2 | BMP8A    | 0.59803201   | 0        |
| RP11-760H22.2 | MATN2    | 0.67869663   | 0        |
| RP11-760H22.2 | PLA2R1   | 0.660016255  | 0        |
| RP11-760H22.2 | COL23A1  | 0.580092024  | 0        |
| RP11-760H22.2 | HGD      | 0.642992537  | 0        |

|               |            |             |            |
|---------------|------------|-------------|------------|
| RP11-760H22.2 | TCEAL2     | 0.499845965 | 0          |
| RP11-760H22.2 | CHRDL1     | 0.347829691 | 6.26E-14   |
| RP11-760H22.2 | TNFRSF11B  | 0.623277317 | 0          |
| RP11-760H22.2 | FAM167A    | 0.682785795 | 0          |
| RP11-760H22.2 | KIT        | 0.734855198 | 0          |
| RP11-760H22.2 | SLC4A4     | 0.731412953 | 0          |
| RP11-760H22.2 | SMOC2      | 0.465534712 | 0          |
| RP11-760H22.2 | FHL1       | 0.756423378 | 0          |
| RP11-760H22.2 | OTOS       | 0.571739803 | 0          |
| RP11-760H22.2 | IGFBPL1    | 0.628059729 | 1.51E-49   |
| RP11-760H22.2 | HBB        | 0.442861054 | 0          |
| RP11-760H22.2 | BEX1       | 0.523783818 | 0          |
| RP11-760H22.2 | FABP4      | 0.548186123 | 8.42E-36   |
| RP11-760H22.2 | LMOD1      | 0.60681187  | 0          |
| RP11-760H22.2 | SOD3       | 0.567836445 | 0          |
| RP11-760H22.2 | TMEM171    | 0.584546135 | 0          |
| RP11-760H22.2 | PI16       | 0.392586031 | 0          |
| RP11-760H22.2 | ZMAT4      | 0.709040881 | 2.71E-68   |
| RP11-760H22.2 | MFAP4      | 0.24119702  | 3.42E-07   |
| RP11-760H22.2 | CWH43      | 0.648382654 | 1.03E-53   |
| RP11-760H22.2 | SPX        | 0.690593787 | 0          |
| RP11-760H22.2 | APOD       | 0.250708618 | 1.13E-07   |
| RP11-760H22.2 | DPP6       | 0.669915068 | 0          |
| RP11-760H22.2 | MMRN1      | 0.505882695 | 0          |
| RP11-760H22.2 | WDR72      | 0.629340287 | 0          |
| RP11-760H22.2 | MPPED2     | 0.731340049 | 0          |
| RP11-760H22.2 | PAPSS2     | 0.463478499 | 0          |
| RP11-760H22.2 | DCN        | 0.129760692 | 0.00651047 |
| RP11-760H22.2 | SORBS2     | 0.738787349 | 0          |
| RP11-760H22.2 | EGR2       | 0.454911253 | 0          |
| RP11-760H22.2 | EDN3       | 0.496504563 | 1.05E-28   |
| RP11-760H22.2 | DIO2       | 0.668895259 | 0          |
| RP11-760H22.2 | ITPR1      | 0.676263272 | 0          |
| RP11-760H22.2 | CFD        | 0.259615139 | 3.83E-08   |
| RP11-760H22.2 | CPXM1      | 0.449075931 | 0          |
| RP11-760H22.2 | ELMO1      | 0.668061257 | 0          |
| RP11-760H22.2 | GPC3       | 0.561079627 | 9.01E-38   |
| RP11-760H22.2 | MYOC       | 0.315002006 | 1.44E-11   |
| RP11-760H22.2 | DEPTOR     | 0.965596978 | 0          |
| RP11-760H22.2 | DGKI       | 0.770171509 | 0          |
| RP11-760H22.2 | CARTPT     | 0.573861679 | 8.22E-40   |
| RP11-760H22.2 | IYD        | 0.480981343 | 0          |
| RP11-760H22.2 | LYVE1      | 0.430854682 | 0          |
| RP11-760H22.2 | CLCNKB     | 0.664936443 | 0          |
| RP11-760H22.2 | NCAM1      | 0.464247398 | 0          |
| RP11-760H22.2 | HBA2       | 0.403903216 | 0          |
| RP11-760H22.2 | GLT8D2     | 0.504254263 | 0          |
| RP11-760H22.2 | OGDHL      | 0.496287271 | 0          |
| RP11-760H22.2 | LIFR       | 0.598965014 | 0          |
| RP11-760H22.2 | CSGALNACT1 | 0.653918818 | 0          |
| RP11-760H22.2 | RAP1GAP    | 0.573417878 | 0          |

|               |          |             |             |
|---------------|----------|-------------|-------------|
| RP11-760H22.2 | COL9A3   | 0.555425979 | 0           |
| RP11-760H22.2 | FBLN1    | 0.203626917 | 1.78E-05    |
| RP11-760H22.2 | EFEMP1   | 0.594366229 | 0           |
| RP11-760H22.2 | AOX1     | 0.549536496 | 5.28E-36    |
| RP11-760H22.2 | GRIN2C   | 0.629908061 | 0           |
| RP11-760H22.2 | C11orf74 | 0.673412346 | 0           |
| RP11-760H22.2 | PPARGC1A | 0.652367829 | 0           |
| RP11-760H22.2 | ANGPTL1  | 0.642636525 | 0           |
| RP11-760H22.2 | SCARA5   | 0.319409649 | 7.20E-12    |
| RP11-760H22.2 | LTF      | 0.532124408 | 0           |
| RP11-760H22.2 | CA4      | 0.605066495 | 3.46E-45    |
| RP11-760H22.2 | TG       | 0.616951665 | 0           |
| RP11-760H22.2 | FCGBP    | 0.69267468  | 0           |
| RP11-760H22.2 | PBX4     | 0.667379587 | 0           |
| RP11-760H22.2 | CYR61    | 0.514064286 | 0           |
| RP11-760H22.2 | FOS      | 0.517970481 | 0           |
| RP11-760H22.2 | KHDRBS2  | 0.631072686 | 0           |
| RP11-760H22.2 | MUM1L1   | 0.572429415 | 0           |
| RP11-760H22.2 | RGS16    | 0.568369611 | 0           |
| RP11-760H22.2 | MT1M     | 0.557597222 | 0           |
| RP11-760H22.2 | LRP2     | 0.677546189 | 0           |
| RP11-760H22.2 | MAFB     | 0.543214086 | 0           |
| RP11-760H22.2 | KCNK2    | 0.686467887 | 0           |
| RP11-760H22.2 | TBC1D4   | 0.573911896 | 0           |
| RP11-760H22.2 | MIOX     | 0.636788461 | 2.68E-51    |
| RP11-760H22.2 | TPPP     | 0.662837253 | 0           |
| RP11-760H22.2 | FMOD     | 0.558738444 | 0           |
| RP11-760H22.2 | CITED2   | 0.601450427 | 0           |
| RP11-760H22.2 | RGS8     | 0.702206312 | 1.82E-66    |
| RP11-760H22.2 | ABI3BP   | 0.403906904 | 0           |
| RP11-760H22.2 | ADH1B    | 0.384304641 | 6.71E-17    |
| RP11-760H22.2 | OGN      | 0.246835695 | 1.62E-07    |
| RP11-760H22.2 | NR4A1    | 0.428429976 | 0           |
| RP11-760H22.2 | FOXJ1    | 0.6329348   | 1.62E-50    |
| RP11-760H22.2 | ALDH1A1  | 0.599863978 | 0           |
| RP11-760H22.2 | OCA2     | 0.687400598 | 1.11E-62    |
| RP11-760H22.2 | TMEM139  | 0.490976322 | 0           |
| RP11-760H22.2 | ARHGAP24 | 0.560154829 | 0           |
| RP11-760H22.2 | SLC25A15 | 0.649590516 | 0           |
| RP11-760H22.2 | DES      | 0.372332411 | 6.97E-16    |
| RP11-760H22.2 | GDF10    | 0.471183686 | 1.21E-25    |
| RP11-760H22.2 | KIAA1324 | 0.568240397 | 0           |
| RP11-760H22.2 | JUN      | 0.512570599 | 0           |
| RP11-760H22.2 | C7       | 0.112337845 | 0.018589851 |
| RP11-760H22.2 | LGI3     | 0.589546036 | 0           |
| RP11-760H22.2 | CDON     | 0.698573969 | 0           |
| RP11-760H22.2 | BCL2     | 0.741945779 | 0           |
| RP11-760H22.2 | HLF      | 0.645106761 | 0           |
| RP11-760H22.2 | EGR1     | 0.495073713 | 0           |
| RP11-760H22.2 | IP6K3    | 0.562548331 | 0           |
| RP11-760H22.2 | SCUBE3   | 0.573337598 | 0           |

|               |          |             |             |
|---------------|----------|-------------|-------------|
| RP11-760H22.2 | PKNOX2   | 0.745245903 | 0           |
| RP11-760H22.2 | SMAD9    | 0.705293929 | 0           |
| RP11-760H22.2 | IQGAP2   | 0.689398667 | 0           |
| RP11-760H22.2 | GNA14    | 0.732256033 | 0           |
| RP11-760H22.2 | LAYN     | 0.61162951  | 0           |
| RP11-760H22.2 | AVPR1A   | 0.605052097 | 0           |
| RP11-760H22.2 | PDLIM3   | 0.497821524 | 0           |
| RP11-760H22.2 | GPM6A    | 0.570699569 | 0           |
| RP11-760H22.2 | SDPR     | 0.52449584  | 0           |
| RP11-760H22.2 | CRYAB    | 0.339953109 | 3.33E-13    |
| RP11-760H22.2 | FOXA2    | 0.562695399 | 5.03E-38    |
| RP11-760H22.2 | C8orf88  | 0.597844076 | 0           |
| RP11-760H22.2 | ISM1     | 0.46606036  | 0           |
| RP11-760H22.2 | BMP2     | 0.539887438 | 0           |
| RP11-760H22.2 | ID4      | 0.720361004 | 0           |
| RP11-760H22.2 | NUPR1    | 0.372328143 | 6.25E-16    |
| RP11-760H22.2 | SERTM1   | 0.617687447 | 1.55E-47    |
| RP11-760H22.2 | IRS1     | 0.644166097 | 0           |
| RP11-760H22.2 | FIBIN    | 0.311438881 | 3.19E-11    |
| RP11-760H22.2 | PODN     | 0.2086532   | 1.09E-05    |
| RP11-760H22.2 | TDRD9    | 0.499100469 | 0           |
| RP11-760H22.2 | EPHA3    | 0.414284985 | 0           |
| RP11-760H22.2 | AIF1L    | 0.624467614 | 0           |
| RP11-760H22.2 | EBF4     | 0.695363061 | 0           |
| RP11-760H22.2 | ADM2     | 0.61477177  | 0           |
| RP11-760H22.2 | GSTM3    | 0.595494402 | 0           |
| RP11-760H22.2 | HSD17B6  | 0.577734407 | 0           |
| RP11-760H22.2 | AGR3     | 0.571038865 | 2.36E-39    |
| RP11-760H22.2 | EPHB1    | 0.520716022 | 0           |
| RP11-760H22.2 | TMOD1    | 0.412200405 | 0           |
| RP11-760H22.2 | WASF3    | 0.645857505 | 0           |
| RP11-760H22.2 | SELV     | 0.68369245  | 9.07E-62    |
| RP11-760H22.2 | ENPP1    | 0.266465731 | 1.63E-08    |
| RP11-760H22.2 | SYNE1    | 0.686516774 | 1.84E-62    |
| RP11-760H22.2 | PLCH1    | 0.65419384  | 0           |
| RP11-760H22.2 | CCDC146  | 0.705761424 | 0           |
| RP11-760H22.2 | SLC16A2  | 0.597107515 | 0           |
| RP11-760H22.2 | IER2     | 0.5494657   | 0           |
| RP11-760H22.2 | KCNAB1   | 0.616002632 | 0           |
| RP11-760H22.2 | SYNDIG1  | 0.639142226 | 0           |
| RP11-760H22.2 | C16orf89 | 0.563227164 | 0           |
| RP11-760H22.2 | CTGF     | 0.412139982 | 0           |
| RP11-760H22.2 | NR4A3    | 0.277289748 | 4.00E-09    |
| RP11-760H22.2 | KIAA1456 | 0.592737513 | 0           |
| RP11-760H22.2 | AQP4     | 0.402462434 | 0           |
| RP11-760H22.2 | RNF150   | 0.716774368 | 0           |
| RP11-760H22.2 | C1S      | 0.066087877 | 0.166829996 |
| RP11-760H22.2 | PFKFB2   | 0.453299557 | 0           |
| RP11-760H22.2 | PROX1    | 0.616541897 | 0           |
| RP11-760H22.2 | TCF7L1   | 0.695727298 | 0           |
| RP11-760H22.2 | HSPB6    | 0.338573317 | 4.21E-13    |

|               |          |              |             |
|---------------|----------|--------------|-------------|
| RP11-760H22.2 | FHDC1    | 0.434819739  | 0           |
| RP11-760H22.2 | PRR15L   | 0.394378427  | 0           |
| RP11-760H22.2 | SLC1A1   | 0.426772468  | 0           |
| RP11-760H22.2 | BTBD11   | 0.690574781  | 0           |
| RP11-760H22.2 | TRIM58   | 0.634500322  | 0           |
| RP11-760H22.2 | LRIG1    | 0.611714329  | 0           |
| RP11-760H22.2 | ROR2     | 0.499936031  | 0           |
| RP11-760H22.2 | GPR125   | 0.708838297  | 0           |
| RP11-760H22.2 | FLRT1    | 0.712625916  | 0           |
| RP11-760H22.2 | PGF      | 0.671007498  | 0           |
| RP11-760H22.2 | DUSP1    | 0.491742384  | 0           |
| RP11-760H22.2 | PLA2G7   | 0.611306689  | 0           |
| RP11-760H22.2 | PLSCR4   | 0.529323976  | 0           |
| RP11-760H22.2 | FAM46B   | 0.485320141  | 0           |
| RP11-760H22.2 | GLDC     | 0.572115813  | 0           |
| RP11-760H22.2 | ZBTB16   | 0.534768961  | 0           |
| RP11-760H22.2 | OMD      | 0.160818008  | 0.000719752 |
| RP11-760H22.2 | HSD11B2  | 0.568220823  | 0           |
| RP11-760H22.2 | FGL2     | 0.207429003  | 1.23E-05    |
| RP11-760H22.2 | CLCNKA   | 0.633031763  | 1.55E-50    |
| RP11-760H22.2 | GATM     | 0.446118911  | 0           |
| RP11-760H22.2 | TNS3     | 0.589340089  | 0           |
| RP11-760H22.2 | TOB1     | 0.545049175  | 0           |
| RP11-760H22.2 | MARC2    | 0.657738634  | 0           |
| RP11-760H22.2 | LRRC2    | 0.581223317  | 0           |
| RP11-760H22.2 | SORD     | 0.555261165  | 0           |
| RP11-760H22.2 | RIMS4    | 0.586548876  | 0           |
| RP11-760H22.2 | SLC29A4  | 0.715909729  | 0           |
| RP11-760H22.2 | SLC39A14 | 0.605382719  | 0           |
| RP11-760H22.2 | FAXDC2   | 0.704806719  | 0           |
| RP11-760H22.2 | HSPB8    | 0.455058763  | 0           |
| RP11-760H22.2 | CCL19    | -0.029675881 | 0.53516391  |
| RP11-760H22.2 | KCNIP3   | 0.634128709  | 0           |
| RP11-760H22.2 | CGNL1    | 0.535695725  | 0           |
| RP11-760H22.2 | ATF3     | 0.287431103  | 1.02E-09    |
| RP11-760H22.2 | SGCD     | 0.510593248  | 0           |
| RP11-760H22.2 | STARD13  | 0.74135219   | 0           |
| RP11-760H22.2 | LDHD     | 0.549016218  | 0           |
| RP11-760H22.2 | RCAN1    | 0.570081727  | 0           |
| RP11-760H22.2 | ID3      | 0.593360178  | 0           |
| RP11-760H22.2 | SYTL3    | 0.630523067  | 0           |
| RP11-760H22.2 | MT1E     | 0.402440733  | 0           |
| RP11-760H22.2 | CAMK1D   | 0.587005308  | 0           |
| RP11-760H22.2 | PRKCQ    | 0.632428649  | 0           |
| RP11-760H22.2 | NUAK2    | 0.500568483  | 0           |
| RP11-760H22.2 | LIPG     | 0.617909633  | 0           |
| RP11-760H22.2 | SLC25A25 | 0.481848251  | 0           |
| RP11-760H22.2 | PRKX     | 0.531735916  | 0           |
| RP11-760H22.2 | SRPX     | 0.249821285  | 1.25E-07    |
| RP11-760H22.2 | FAM189A1 | 0.609873283  | 0           |
| RP11-760H22.2 | PLEKHH1  | 0.58607443   | 0           |

|               |          |             |             |
|---------------|----------|-------------|-------------|
| RP11-760H22.2 | WNT11    | 0.576256606 | 0           |
| RP11-760H22.2 | SNAI1    | 0.541783233 | 0           |
| RP11-760H22.2 | FDCSP    | 0.013684594 | 0.774939398 |
| RP11-760H22.2 | MT1X     | 0.344722666 | 1.47E-13    |
| RP11-760H22.2 | ACACB    | 0.700065954 | 0           |
| RP11-760H22.2 | ARC      | 0.242326753 | 3.00E-07    |
| RP11-760H22.2 | KLK4     | 0.342432824 | 1.60E-13    |
| RP11-760H22.2 | ZFPM2    | 0.532350355 | 0           |
| RP11-760H22.2 | AKAP12   | 0.469090852 | 0           |
| RP11-760H22.2 | GJB6     | 0.615703302 | 3.69E-47    |
| RP11-760H22.2 | ERO1LB   | 0.696190822 | 0           |
| RP11-760H22.2 | DNALI1   | 0.622114536 | 0           |
| RP11-760H22.2 | HKDC1    | 0.465760091 | 0           |
| RP11-760H22.2 | ZFP36L2  | 0.709603792 | 0           |
| RP11-760H22.2 | CAPSL    | 0.548822724 | 6.76E-36    |
| RP11-760H22.2 | CYP7B1   | 0.554883027 | 0           |
| RP11-760H22.2 | CPQ      | 0.672861451 | 0           |
| RP11-760H22.2 | RPS6KA6  | 0.746997334 | 1.70E-79    |
| RP11-760H22.2 | TLE1     | 0.631069849 | 0           |
| RP11-760H22.2 | TP53INP2 | 0.682135046 | 0           |
| RP11-760H22.2 | KATNAL2  | 0.698756088 | 0           |
| RP11-760H22.2 | SGPP2    | 0.274121957 | 6.06E-09    |
| RP11-760H22.2 | CTH      | 0.630265916 | 0           |
| RP11-760H22.2 | KIF12    | 0.602057064 | 0           |
| RP11-760H22.2 | TMEM220  | 0.56470227  | 0           |
| RP11-760H22.2 | CENPJ    | 0.588576154 | 0           |
| RP11-760H22.2 | FAM155B  | 0.380918651 | 3.71E-17    |
| RP11-760H22.2 | WFS1     | 0.667785951 | 0           |
| RP11-760H22.2 | SELENBP1 | 0.472545721 | 0           |
| RP11-760H22.2 | SNTA1    | 0.483238255 | 0           |
| RP11-760H22.2 | FRAS1    | 0.463715934 | 0           |
| RP11-760H22.2 | FBLN7    | 0.548268594 | 0           |
| RP11-760H22.2 | AGPAT9   | 0.636352148 | 0           |
| RP11-760H22.2 | GPR83    | 0.545318807 | 0           |
| RP11-760H22.2 | PRTG     | 0.577390594 | 0           |
| RP11-760H22.2 | EGR3     | 0.263149295 | 2.47E-08    |
| RP11-760H22.2 | GRAMD2   | 0.580954252 | 0           |
| RP11-760H22.2 | HYOU1    | 0.640638749 | 0           |
| RP11-760H22.2 | FBLN5    | 0.367690494 | 1.82E-15    |
| RP11-760H22.2 | ITM2A    | 0.595161794 | 0           |
| RP11-760H22.2 | SRF      | 0.559290332 | 0           |
| RP11-760H22.2 | FGFR2    | 0.612218702 | 0           |
| RP11-760H22.2 | MT1A     | 0.305411523 | 6.25E-11    |
| RP11-760H22.2 | MAMDC2   | 0.396545557 | 0           |
| RP11-760H22.2 | FHL2     | 0.425341757 | 0           |
| RP11-760H22.2 | FTCDNL1  | 0.517146549 | 0           |
| RP11-760H22.2 | PKIA     | 0.533463351 | 0           |
| RP11-760H22.2 | DNAJB4   | 0.583971269 | 0           |
| RP11-760H22.2 | SLC25A33 | 0.6402026   | 0           |
| RP11-760H22.2 | EYA2     | 0.445917502 | 0           |
| RP11-760H22.2 | LPAR1    | 0.394655577 | 0           |

|               |          |             |             |
|---------------|----------|-------------|-------------|
| RP11-760H22.2 | STX11    | 0.198881756 | 2.80E-05    |
| RP11-760H22.2 | ARHGEF28 | 0.48957029  | 0           |
| RP11-760H22.2 | OR2W3    | 0.663800753 | 0           |
| RP11-760H22.2 | ALDH1B1  | 0.485873677 | 2.18E-27    |
| RP11-760H22.2 | CXCL12   | 0.213793094 | 6.53E-06    |
| RP11-760H22.2 | OLFM2    | 0.583971695 | 0           |
| RP11-760H22.2 | TUB      | 0.566447717 | 0           |
| RP11-760H22.2 | HTRA3    | 0.352836459 | 3.44E-14    |
| RP11-760H22.2 | CKB      | 0.489385193 | 0           |
| RP11-760H22.2 | RGS2     | 0.148106758 | 0.00187943  |
| RP11-760H22.2 | SHANK2   | 0.724353435 | 0           |
| RP11-760H22.2 | CNTFR    | 0.446504664 | 6.73E-23    |
| RP11-760H22.2 | CYTH3    | 0.599098483 | 0           |
| RP11-760H22.2 | PLAC9    | 0.413908549 | 0           |
| RP11-760H22.2 | WVOX     | 0.646021043 | 0           |
| RP11-760H22.2 | NPR3     | 0.592486178 | 0           |
| RP11-760H22.2 | SDC2     | 0.631515643 | 0           |
| RP11-760H22.2 | KLF15    | 0.558958291 | 0           |
| RP11-760H22.2 | TMEM164  | 0.66448767  | 0           |
| RP11-760H22.2 | LONRF3   | 0.373950618 | 4.14E-16    |
| RP11-760H22.2 | GBP1     | 0.160791253 | 0.000731588 |
| RP11-760H22.2 | ARHGAP6  | 0.622000216 | 0           |
| RP11-760H22.2 | TMEM119  | 0.152552785 | 0.00136098  |
| RP11-760H22.2 | SH3RF1   | 0.598068746 | 0           |
| RP11-760H22.2 | CRELD2   | 0.59139545  | 0           |
| RP11-760H22.2 | PCP4     | 0.212644213 | 7.34E-06    |
| RP11-760H22.2 | GCSH     | 0.651120371 | 0           |
| RP11-760H22.2 | IMPA2    | 0.692014286 | 0           |
| RP11-760H22.2 | C1R      | 0.066339779 | 0.165216257 |
| RP11-760H22.2 | SUCNR1   | 0.375353529 | 2.83E-16    |
| RP11-760H22.2 | SFRP1    | 0.427056    | 0           |
| RP11-760H22.2 | UGT8     | 0.501060091 | 0           |
| RP11-760H22.2 | TLE4     | 0.418449323 | 0           |
| RP11-760H22.2 | ANTXR1   | 0.46543032  | 0           |
| RP11-760H22.2 | GPX3     | 0.602505695 | 0           |
| RP11-760H22.2 | DPY19L2  | 0.601346602 | 0           |
| RP11-760H22.2 | FAM46C   | 0.43379681  | 0           |
| RP11-760H22.2 | IL33     | 0.33923046  | 2.77E-13    |
| RP11-760H22.2 | PEG3     | 0.621750015 | 0           |
| RP11-760H22.2 | FAHD2A   | 0.630359529 | 0           |
| RP11-760H22.2 | PTGDS    | 0.079579566 | 0.095850514 |
| RP11-760H22.2 | CHCHD10  | 0.389679505 | 0           |
| RP11-760H22.2 | CD36     | 0.555450801 | 0           |
| RP11-760H22.2 | ANKRD37  | 0.577450307 | 0           |
| RP11-760H22.2 | TSPAN33  | 0.535983797 | 0           |
| RP11-760H22.2 | PRDM16   | 0.675894921 | 0           |
| RP11-760H22.2 | UST      | 0.520332778 | 0           |
| RP11-760H22.2 | NEXN     | 0.538829475 | 0           |
| RP11-760H22.2 | NUPR1L   | 0.201751689 | 2.05E-05    |
| RP11-760H22.2 | SLC24A3  | 0.56996542  | 0           |
| RP11-760H22.2 | MARC1    | 0.669765146 | 0           |



|               |          |             |             |
|---------------|----------|-------------|-------------|
| RP11-760H22.2 | MYH11    | 0.410437794 | 0           |
| RP11-760H22.2 | APOA1    | 0.59561931  | 1.69E-43    |
| RP11-760H22.2 | TMEM178B | 0.541642956 | 0           |
| RP11-760H22.2 | CAPN6    | 0.349899969 | 4.34E-14    |
| RP11-760H22.2 | PPM1L    | 0.666266733 | 0           |
| RP11-760H22.2 | FZD8     | 0.734086867 | 0           |
| RP11-760H22.2 | RCAN2    | 0.621847741 | 0           |
| RP11-760H22.2 | COPZ2    | 0.518296139 | 0           |
| RP11-760H22.2 | GAS1     | 0.265092038 | 1.93E-08    |
| RP11-760H22.2 | DACT1    | 0.558845673 | 0           |
| RP11-760H22.2 | WBSCR17  | 0.653330478 | 0           |
| RP11-760H22.2 | NCS1     | 0.569921451 | 0           |
| RP11-760H22.2 | SPIRE2   | 0.60527776  | 0           |
| RP11-760H22.2 | C15orf52 | 0.382193767 | 1.52E-17    |
| RP11-760H22.2 | SPAG5    | 0.540493792 | 0           |
| RP11-760H22.2 | ARL4D    | 0.487023463 | 0           |
| RP11-760H22.2 | FAM189A2 | 0.525775495 | 0           |
| RP11-760H22.2 | MAP1LC3A | 0.576620702 | 0           |
| RP11-760H22.2 | KLF6     | 0.217310655 | 4.56E-06    |
| RP11-760H22.2 | ADD3     | 0.448308167 | 0           |
| RP11-760H22.2 | TSPAN7   | 0.497421826 | 0           |
| RP11-760H22.2 | KLF9     | 0.460858767 | 0           |
| RP11-760H22.2 | KCNQ1    | 0.539531569 | 0           |
| RP11-760H22.2 | MAN1A1   | 0.231189134 | 1.05E-06    |
| RP11-760H22.2 | MLF1     | 0.440516911 | 0           |
| RP11-760H22.2 | RARB     | 0.612499397 | 0           |
| RP11-760H22.2 | CDC42EP2 | 0.438253474 | 0           |
| RP11-760H22.2 | FAM3B    | 0.231316504 | 1.03E-06    |
| RP11-760H22.2 | GADD45B  | 0.301782042 | 1.33E-10    |
| RP11-760H22.2 | TMEM47   | 0.563957341 | 0           |
| RP11-760H22.2 | SDF2L1   | 0.488751464 | 0           |
| RP11-760H22.2 | CCDC85A  | 0.520788501 | 0           |
| RP11-760H22.2 | CRYBG3   | 0.325906127 | 3.37E-12    |
| RP11-760H22.2 | FBLN2    | 0.103224809 | 0.030625286 |
| RP11-760H22.2 | PEBP4    | 0.08131778  | 0.088797099 |
| RP11-760H22.2 | CDADC1   | 0.636391436 | 0           |
| RP11-760H22.2 | FAM63A   | 0.542822899 | 0           |
| RP11-760H22.2 | GLUL     | 0.429985788 | 0           |
| RP11-760H22.2 | FREM2    | 0.39882644  | 0           |
| RP11-760H22.2 | ACKR3    | 0.62237112  | 0           |
| RP11-760H22.2 | DENND6A  | 0.761844677 | 0           |
| RP11-760H22.2 | CLDN8    | 0.343586834 | 1.79E-13    |
| RP11-760H22.2 | UTS2R    | 0.388186245 | 3.08E-17    |
| RP11-760H22.2 | SCNN1B   | 0.488743238 | 0           |
| RP11-760H22.2 | TTC30A   | 0.671681933 | 0           |
| RP11-760H22.2 | CORO2B   | 0.581551812 | 0           |
| RP11-760H22.2 | TC2N     | 0.454534675 | 0           |
| RP11-760H22.2 | ALDH2    | 0.47141613  | 0           |
| RP11-760H22.2 | GPR183   | 0.052326554 | 0.273843018 |
| RP11-760H22.2 | C4orf47  | 0.597464378 | 0           |
| RP11-760H22.2 | SLC25A42 | 0.63133012  | 0           |

|               |          |              |             |
|---------------|----------|--------------|-------------|
| RP11-760H22.2 | LGMN     | 0.570554044  | 0           |
| RP11-760H22.2 | ACSF2    | 0.547452038  | 0           |
| RP11-760H22.2 | KIAA1467 | 0.605844683  | 0           |
| RP11-760H22.2 | PRKG1    | 0.621572577  | 0           |
| RP11-760H22.2 | GNAI1    | 0.64616827   | 0           |
| RP11-760H22.2 | ABCC4    | 0.465309191  | 0           |
| RP11-760H22.2 | PRPS1    | 0.603871303  | 0           |
| RP11-760H22.2 | TSPAN5   | 0.611484553  | 0           |
| RP11-760H22.2 | CR2      | 0.146249563  | 0.002125828 |
| RP11-760H22.2 | CCDC170  | 0.66597001   | 0           |
| RP11-760H22.2 | RRAD     | 0.094052485  | 0.048938952 |
| RP11-760H22.2 | SCGB2A1  | 0.415199267  | 0           |
| RP11-760H22.2 | SESN3    | 0.453718402  | 0           |
| RP11-760H22.2 | SGK223   | 0.382374325  | 1.27E-17    |
| RP11-760H22.2 | NDRG2    | 0.605249818  | 0           |
| RP11-760H22.2 | C3orf52  | 0.411459731  | 0           |
| RP11-760H22.2 | FLRT3    | -0.235187523 | 6.73E-07    |
| RP11-760H22.2 | MST1R    | -0.562707898 | 0           |
| RP11-760H22.2 | SDC1     | -0.337938029 | 4.69E-13    |
| RP11-760H22.2 | ST8SIA4  | -0.451930971 | 0           |
| RP11-760H22.2 | UBTD1    | -0.454655236 | 0           |
| RP11-760H22.2 | EPHA2    | -0.293757039 | 4.21E-10    |
| RP11-760H22.2 | TMEM130  | -0.167621987 | 0.00042753  |
| RP11-760H22.2 | SPINK2   | -0.651416811 | 0           |
| RP11-760H22.2 | MMP16    | -0.396045013 | 0           |
| RP11-760H22.2 | SIGLEC15 | -0.517004428 | 0           |
| RP11-760H22.2 | RIN1     | -0.572990097 | 0           |
| RP11-760H22.2 | IL1RN    | -0.51965508  | 0           |
| RP11-760H22.2 | FCER1G   | -0.431762723 | 0           |
| RP11-760H22.2 | CD276    | -0.568398829 | 0           |
| RP11-760H22.2 | CTSB     | -0.594711035 | 0           |
| RP11-760H22.2 | FAM171A2 | -0.202236913 | 2.04E-05    |
| RP11-760H22.2 | ASPHD1   | -0.645612552 | 0           |
| RP11-760H22.2 | C15orf48 | -0.463503037 | 0           |
| RP11-760H22.2 | DYSF     | -0.186481078 | 8.71E-05    |
| RP11-760H22.2 | PDZRN4   | -0.144671888 | 0.002397672 |
| RP11-760H22.2 | EFHD2    | -0.206645637 | 1.33E-05    |
| RP11-760H22.2 | ASF1B    | -0.48532397  | 0           |
| RP11-760H22.2 | AQP1     | -0.190623431 | 6.01E-05    |
| RP11-760H22.2 | ARRDC2   | -0.397463243 | 0           |
| RP11-760H22.2 | PRSS1    | -0.438062904 | 5.21E-22    |
| RP11-760H22.2 | MAPK13   | -0.612857536 | 0           |
| RP11-760H22.2 | CST5     | -0.448567596 | 4.05E-23    |
| RP11-760H22.2 | AHR      | -0.319034118 | 9.96E-12    |
| RP11-760H22.2 | BAX      | -0.492410011 | 0           |
| RP11-760H22.2 | C1orf115 | -0.340372805 | 3.10E-13    |
| RP11-760H22.2 | PLK3     | -0.368573289 | 1.50E-15    |
| RP11-760H22.2 | JAG2     | -0.269562603 | 1.09E-08    |
| RP11-760H22.2 | RAD23B   | -0.462272458 | 0           |
| RP11-760H22.2 | CA12     | 0.049229399  | 0.303279622 |
| RP11-760H22.2 | ADTRP    | -0.307686012 | 5.60E-11    |

|               |          |              |             |
|---------------|----------|--------------|-------------|
| RP11-760H22.2 | UCP2     | -0.340341742 | 3.12E-13    |
| RP11-760H22.2 | IGFBP2   | -0.218663072 | 3.97E-06    |
| RP11-760H22.2 | LOXL2    | -0.280101669 | 2.75E-09    |
| RP11-760H22.2 | GPX1     | -0.460118661 | 0           |
| RP11-760H22.2 | P3H3     | -0.480652564 | 0           |
| RP11-760H22.2 | C2orf81  | -0.410369145 | 0           |
| RP11-760H22.2 | CDT1     | -0.50383329  | 0           |
| RP11-760H22.2 | SNX25    | -0.285304964 | 1.36E-09    |
| RP11-760H22.2 | MTHFD1L  | -0.43705183  | 0           |
| RP11-760H22.2 | CDC42BPG | -0.559825007 | 1.41E-37    |
| RP11-760H22.2 | MSN      | -0.563500626 | 0           |
| RP11-760H22.2 | SIGLEC6  | -0.447803411 | 4.89E-23    |
| RP11-760H22.2 | F2R      | -0.06111535  | 0.201147314 |
| RP11-760H22.2 | TMEM184A | -0.552104012 | 0           |
| RP11-760H22.2 | CKS2     | -0.297516999 | 2.47E-10    |
| RP11-760H22.2 | TAX1BP3  | -0.524586899 | 0           |
| RP11-760H22.2 | PMEP1    | -0.473163989 | 0           |
| RP11-760H22.2 | CXCL16   | -0.586549301 | 0           |
| RP11-760H22.2 | FAXC     | -0.4624255   | 0           |
| RP11-760H22.2 | VTCN1    | -0.476028128 | 3.28E-26    |
| RP11-760H22.2 | SH2D4A   | -0.477298116 | 0           |
| RP11-760H22.2 | RNF24    | -0.315027644 | 1.85E-11    |
| RP11-760H22.2 | LY6G6C   | -0.44964812  | 3.09E-23    |
| RP11-760H22.2 | NID1     | -0.280679088 | 2.54E-09    |
| RP11-760H22.2 | STAC     | -0.534489401 | 0           |
| RP11-760H22.2 | RAB34    | -0.512665488 | 0           |
| RP11-760H22.2 | HES4     | -0.308845105 | 4.71E-11    |
| RP11-760H22.2 | EPHA10   | -0.621366629 | 0           |
| RP11-760H22.2 | ENTPD2   | -0.443134657 | 0           |
| RP11-760H22.2 | DDB2     | -0.566602887 | 0           |
| RP11-760H22.2 | NKAIN4   | -0.268497689 | 1.25E-08    |
| RP11-760H22.2 | TRIM29   | -0.306870591 | 6.32E-11    |
| RP11-760H22.2 | ADCY8    | -0.61724274  | 1.89E-47    |
| RP11-760H22.2 | SFTA2    | -0.44331862  | 0           |
| RP11-760H22.2 | NRIP1    | -0.335171637 | 7.45E-13    |
| RP11-760H22.2 | VWA1     | -0.115279547 | 0.015709349 |
| RP11-760H22.2 | APLNR    | -0.182955574 | 0.000118722 |
| RP11-760H22.2 | REN      | -0.59611139  | 1.39E-43    |
| RP11-760H22.2 | EDIL3    | -0.220264129 | 3.36E-06    |
| RP11-760H22.2 | AGR1     | -0.336291016 | 6.18E-13    |
| RP11-760H22.2 | TREM1    | -0.488346661 | 0           |
| RP11-760H22.2 | SRL      | -0.321471872 | 6.81E-12    |
| RP11-760H22.2 | RASGRF1  | -0.459166083 | 0           |
| RP11-760H22.2 | RMI2     | -0.469759331 | 0           |
| RP11-760H22.2 | SAMD1    | -0.481194524 | 0           |
| RP11-760H22.2 | MGAT4B   | -0.610386166 | 0           |
| RP11-760H22.2 | NXN      | -0.490730518 | 0           |
| RP11-760H22.2 | SH3BGRL3 | -0.600749326 | 0           |
| RP11-760H22.2 | CA11     | -0.441846351 | 0           |
| RP11-760H22.2 | PLD3     | -0.371712144 | 7.26E-16    |
| RP11-760H22.2 | LURAP1L  | -0.527615831 | 0           |

|               |          |              |             |
|---------------|----------|--------------|-------------|
| RP11-760H22.2 | CARNS1   | -0.300556569 | 1.59E-10    |
| RP11-760H22.2 | PDLIM7   | -0.506334021 | 0           |
| RP11-760H22.2 | BCL2L1   | -0.563544879 | 0           |
| RP11-760H22.2 | GGT6     | -0.39640145  | 0           |
| RP11-760H22.2 | DPYSL3   | -0.304653676 | 8.76E-11    |
| RP11-760H22.2 | FYN      | -0.488972163 | 0           |
| RP11-760H22.2 | TK1      | -0.455624268 | 0           |
| RP11-760H22.2 | AK1      | -0.449408397 | 0           |
| RP11-760H22.2 | HIGD1B   | -0.100994562 | 0.034428788 |
| RP11-760H22.2 | TMEM59L  | -0.24324912  | 2.70E-07    |
| RP11-760H22.2 | MEGF9    | -0.351744029 | 4.20E-14    |
| RP11-760H22.2 | ZFP36L1  | -0.396327411 | 0           |
| RP11-760H22.2 | ADRA1B   | -0.33408715  | 8.92E-13    |
| RP11-760H22.2 | EPHA4    | -0.43104602  | 0           |
| RP11-760H22.2 | TCERG1L  | -0.064930344 | 0.174397528 |
| RP11-760H22.2 | NGFR     | -0.305501579 | 7.73E-11    |
| RP11-760H22.2 | EBI3     | -0.567990338 | 0           |
| RP11-760H22.2 | S100A10  | -0.4443763   | 0           |
| RP11-760H22.2 | S100B    | -0.520342281 | 0           |
| RP11-760H22.2 | CD44     | -0.371467901 | 7.70E-16    |
| RP11-760H22.2 | BHLHE41  | -0.373058604 | 5.21E-16    |
| RP11-760H22.2 | FBXO2    | -0.49517924  | 0           |
| RP11-760H22.2 | SLC30A2  | -0.29542405  | 3.32E-10    |
| RP11-760H22.2 | FRMD5    | -0.651204339 | 0           |
| RP11-760H22.2 | SAMD11   | -0.200526358 | 2.40E-05    |
| RP11-760H22.2 | SIPA1L2  | -0.281404585 | 2.31E-09    |
| RP11-760H22.2 | S100A16  | -0.521132882 | 0           |
| RP11-760H22.2 | PPL      | -0.456057297 | 0           |
| RP11-760H22.2 | ARHGDIB  | -0.229817002 | 1.22E-06    |
| RP11-760H22.2 | CDC42EP3 | -0.557991529 | 0           |
| RP11-760H22.2 | RUNX2    | -0.507010726 | 0           |
| RP11-760H22.2 | LAMC2    | -0.550803366 | 0           |
| RP11-760H22.2 | BRINP1   | -0.542751981 | 0           |
| RP11-760H22.2 | GPRC5B   | -0.510155113 | 0           |
| RP11-760H22.2 | AQP5     | -0.09469444  | 0.047411083 |
| RP11-760H22.2 | PLAG1    | -0.400347926 | 0           |
| RP11-760H22.2 | PTPRU    | -0.386232579 | 0           |
| RP11-760H22.2 | ANGPTL4  | -0.375948394 | 2.39E-16    |
| RP11-760H22.2 | PALM3    | -0.327372297 | 2.67E-12    |
| RP11-760H22.2 | ACP5     | -0.423405254 | 0           |
| RP11-760H22.2 | DLG4     | -0.416406443 | 0           |
| RP11-760H22.2 | ETNK2    | -0.508923116 | 0           |
| RP11-760H22.2 | CD109    | -0.369280347 | 1.28E-15    |
| RP11-760H22.2 | SNX22    | -0.289157402 | 8.01E-10    |
| RP11-760H22.2 | TMEM98   | -0.407772391 | 0           |
| RP11-760H22.2 | CTHRC1   | -0.432982665 | 0           |
| RP11-760H22.2 | S100A2   | -0.410886851 | 0           |
| RP11-760H22.2 | C11orf80 | -0.655062025 | 0           |
| RP11-760H22.2 | SREBF1   | -0.490106151 | 0           |
| RP11-760H22.2 | PRSS22   | -0.582191781 | 0           |
| RP11-760H22.2 | CMTM3    | -0.550049927 | 0           |

|               |          |              |             |
|---------------|----------|--------------|-------------|
| RP11-760H22.2 | RDH5     | -0.460275533 | 0           |
| RP11-760H22.2 | MYH10    | -0.46898178  | 0           |
| RP11-760H22.2 | EVPL     | -0.424324217 | 0           |
| RP11-760H22.2 | SCD      | -0.483131735 | 0           |
| RP11-760H22.2 | CD151    | -0.465495281 | 0           |
| RP11-760H22.2 | S100A4   | -0.501556521 | 0           |
| RP11-760H22.2 | BNIP1    | -0.470217607 | 0           |
| RP11-760H22.2 | MAP3K6   | -0.576521983 | 0           |
| RP11-760H22.2 | MANEAL   | -0.578786697 | 0           |
| RP11-760H22.2 | CD207    | -0.508577394 | 2.97E-30    |
| RP11-760H22.2 | CD1A     | -0.543178037 | 4.65E-35    |
| RP11-760H22.2 | C3       | -0.326151788 | 3.24E-12    |
| RP11-760H22.2 | NT5E     | -0.370471495 | 9.73E-16    |
| RP11-760H22.2 | CACNG4   | -0.421711309 | 2.34E-20    |
| RP11-760H22.2 | FHOD1    | -0.491513743 | 0           |
| RP11-760H22.2 | LEMD1    | -0.61722073  | 0           |
| RP11-760H22.2 | ATP11A   | -0.312600243 | 2.68E-11    |
| RP11-760H22.2 | PPAP2C   | -0.330641075 | 1.57E-12    |
| RP11-760H22.2 | DRAM1    | -0.440606694 | 0           |
| RP11-760H22.2 | CDA      | -0.213144614 | 6.98E-06    |
| RP11-760H22.2 | CCND2    | -0.361311653 | 6.84E-15    |
| RP11-760H22.2 | LCN6     | -0.186504345 | 8.46E-05    |
| RP11-760H22.2 | CDH4     | -0.310443468 | 3.70E-11    |
| RP11-760H22.2 | MMP11    | -0.533145352 | 0           |
| RP11-760H22.2 | B3GAT1   | -0.299267837 | 1.92E-10    |
| RP11-760H22.2 | SPP1     | -0.359169771 | 1.04E-14    |
| RP11-760H22.2 | HLA-DQB1 | -0.420693186 | 0           |
| RP11-760H22.2 | SDC3     | -0.454886573 | 0           |
| RP11-760H22.2 | CX3CL1   | -0.340273377 | 3.16E-13    |
| RP11-760H22.2 | SDK1     | -0.333674972 | 9.55E-13    |
| RP11-760H22.2 | DOCK9    | -0.416492396 | 0           |
| RP11-760H22.2 | CSF2     | -0.631244872 | 3.53E-50    |
| RP11-760H22.2 | GRHL3    | -0.592336398 | 0           |
| RP11-760H22.2 | TMEM92   | -0.701194559 | 3.36E-66    |
| RP11-760H22.2 | BASP1    | -0.549262589 | 0           |
| RP11-760H22.2 | HRH1     | -0.460165325 | 0           |
| RP11-760H22.2 | ESM1     | 0.046324433  | 0.332730086 |
| RP11-760H22.2 | B4GALNT3 | -0.482087956 | 0           |
| RP11-760H22.2 | LMO3     | -0.278337215 | 3.48E-09    |
| RP11-760H22.2 | C9orf16  | -0.551892533 | 0           |
| RP11-760H22.2 | SEMA3F   | -0.216667849 | 4.88E-06    |
| RP11-760H22.2 | PLA2G12B | -0.452383302 | 1.56E-23    |
| RP11-760H22.2 | KLK6     | -0.382581403 | 9.46E-17    |
| RP11-760H22.2 | ST3GAL5  | -0.46409776  | 0           |
| RP11-760H22.2 | FAM132B  | -0.196645552 | 3.46E-05    |
| RP11-760H22.2 | CDKN1A   | -0.265304936 | 1.88E-08    |
| RP11-760H22.2 | E2F1     | -0.524050188 | 0           |
| RP11-760H22.2 | B3GNT8   | -0.454603608 | 0           |
| RP11-760H22.2 | MTMR11   | -0.614736027 | 0           |
| RP11-760H22.2 | MYO1G    | -0.434978313 | 0           |
| RP11-760H22.2 | TMSB10   | -0.521971706 | 0           |

|               |          |              |             |
|---------------|----------|--------------|-------------|
| RP11-760H22.2 | UNC5CL   | -0.664589793 | 0           |
| RP11-760H22.2 | ABR      | -0.577363787 | 0           |
| RP11-760H22.2 | PLP2     | -0.640851363 | 0           |
| RP11-760H22.2 | SRCIN1   | -0.56073395  | 0           |
| RP11-760H22.2 | PDE9A    | -0.557878911 | 0           |
| RP11-760H22.2 | TREM2    | -0.393087851 | 0           |
| RP11-760H22.2 | KDELR3   | -0.393924406 | 0           |
| RP11-760H22.2 | PC       | -0.504247029 | 0           |
| RP11-760H22.2 | C2CD4A   | -0.588212342 | 0           |
| RP11-760H22.2 | PELI1    | -0.444888048 | 0           |
| RP11-760H22.2 | SSX1     | -0.158604833 | 0.000865096 |
| RP11-760H22.2 | MROH6    | -0.56689493  | 0           |
| RP11-760H22.2 | ESPN     | -0.503306649 | 0           |
| RP11-760H22.2 | BMP1     | -0.476021156 | 0           |
| RP11-760H22.2 | TM4SF4   | -0.458142769 | 3.64E-24    |
| RP11-760H22.2 | CORO2A   | -0.48342548  | 0           |
| RP11-760H22.2 | CD164L2  | -0.581596511 | 4.32E-41    |
| RP11-760H22.2 | CTSS     | -0.487925547 | 0           |
| RP11-760H22.2 | CLU      | -0.394713872 | 0           |
| RP11-760H22.2 | TMSB4X   | -0.498583756 | 0           |
| RP11-760H22.2 | WNT10A   | -0.488809493 | 9.55E-28    |
| RP11-760H22.2 | NAPSA    | -0.383768726 | 0           |
| RP11-760H22.2 | PLEKHA4  | -0.448435962 | 0           |
| RP11-760H22.2 | SFTPA1   | -0.216568411 | 4.67E-06    |
| RP11-760H22.2 | C1orf116 | -0.469741176 | 0           |
| RP11-760H22.2 | TM4SF1   | -0.39039791  | 0           |
| RP11-760H22.2 | SEL1L3   | -0.32914285  | 2.00E-12    |
| RP11-760H22.2 | VASN     | -0.551563187 | 0           |
| RP11-760H22.2 | NPTXR    | -0.575856625 | 0           |
| RP11-760H22.2 | PDE4C    | -0.573393198 | 0           |
| RP11-760H22.2 | CDC42EP1 | -0.486967295 | 0           |
| RP11-760H22.2 | ENDOD1   | -0.578851375 | 0           |
| RP11-760H22.2 | RYR1     | -0.415792288 | 0           |
| RP11-760H22.2 | IL1RAP   | -0.447410196 | 0           |
| RP11-760H22.2 | SLC35F2  | -0.537483814 | 3.14E-34    |
| RP11-760H22.2 | ISYNA1   | -0.456087508 | 0           |
| RP11-760H22.2 | HLA-G    | -0.47389828  | 0           |
| RP11-760H22.2 | CDKN2B   | -0.472574656 | 0           |
| RP11-760H22.2 | ALDH1A3  | -0.382436734 | 1.18E-17    |
| RP11-760H22.2 | CLIP3    | -0.432395743 | 0           |
| RP11-760H22.2 | ULBP2    | -0.456060417 | 0           |
| RP11-760H22.2 | ETHE1    | -0.627065787 | 0           |
| RP11-760H22.2 | XPR1     | -0.468400957 | 0           |
| RP11-760H22.2 | SPTBN2   | -0.681695776 | 0           |
| RP11-760H22.2 | IVL      | -0.629243784 | 8.83E-50    |
| RP11-760H22.2 | MARCO    | -0.479662683 | 0           |
| RP11-760H22.2 | PLXND1   | -0.324768451 | 4.05E-12    |
| RP11-760H22.2 | EMILIN2  | -0.48291671  | 0           |
| RP11-760H22.2 | PLAUR    | -0.496752072 | 0           |
| RP11-760H22.2 | CDC42EP5 | -0.526442838 | 0           |
| RP11-760H22.2 | TRPC5    | -0.349281966 | 4.84E-14    |

|               |          |              |             |
|---------------|----------|--------------|-------------|
| RP11-760H22.2 | TMEM100  | -0.43874182  | 0           |
| RP11-760H22.2 | QSOX1    | -0.550305943 | 0           |
| RP11-760H22.2 | ARHGAP23 | -0.405503848 | 0           |
| RP11-760H22.2 | MDFI     | -0.248293274 | 1.50E-07    |
| RP11-760H22.2 | FSTL3    | -0.450470616 | 0           |
| RP11-760H22.2 | INF2     | -0.52873365  | 0           |
| RP11-760H22.2 | TGFBR1   | -0.55792983  | 0           |
| RP11-760H22.2 | TGFBI    | -0.425203607 | 0           |
| RP11-760H22.2 | ERBB3    | -0.542342071 | 0           |
| RP11-760H22.2 | CCL18    | -0.299419035 | 1.88E-10    |
| RP11-760H22.2 | CCL17    | -0.4785641   | 1.65E-26    |
| RP11-760H22.2 | C16orf45 | -0.302185001 | 1.26E-10    |
| RP11-760H22.2 | PRDM1    | -0.319931379 | 8.67E-12    |
| RP11-760H22.2 | TRIM47   | -0.621231317 | 0           |
| RP11-760H22.2 | CNFN     | -0.483514838 | 0           |
| RP11-760H22.2 | ARMCX3   | -0.409334443 | 0           |
| RP11-760H22.2 | RAMP1    | -0.345197111 | 1.35E-13    |
| RP11-760H22.2 | GABRD    | -0.061578023 | 0.197752629 |
| RP11-760H22.2 | COL13A1  | -0.32714706  | 2.77E-12    |
| RP11-760H22.2 | S100A5   | -0.538774726 | 0           |
| RP11-760H22.2 | MISP     | -0.374200961 | 3.88E-16    |
| RP11-760H22.2 | HES6     | -0.275883716 | 4.81E-09    |
| RP11-760H22.2 | PSD3     | -0.527101246 | 0           |
| RP11-760H22.2 | DOK7     | -0.394169076 | 0           |
| RP11-760H22.2 | ZMAT3    | -0.44739275  | 0           |
| RP11-760H22.2 | MFAP2    | -0.402308541 | 0           |
| RP11-760H22.2 | TMEM79   | -0.629852319 | 0           |
| RP11-760H22.2 | SLC1A5   | -0.397625079 | 0           |
| RP11-760H22.2 | BBC3     | -0.510548002 | 0           |
| RP11-760H22.2 | HLA-DQB2 | -0.509299552 | 0           |
| RP11-760H22.2 | C1QL1    | -0.372008726 | 6.75E-16    |
| RP11-760H22.2 | TMEM215  | -0.221490191 | 2.79E-06    |
| RP11-760H22.2 | PNP      | -0.461113081 | 0           |
| RP11-760H22.2 | ARNTL    | -0.426099167 | 0           |
| RP11-760H22.2 | CLDN2    | -0.47438494  | 5.12E-26    |
| RP11-760H22.2 | MVP      | -0.672246303 | 0           |
| RP11-760H22.2 | LGALS1   | -0.516876491 | 0           |
| RP11-760H22.2 | BIRC7    | -0.541916803 | 7.13E-35    |
| RP11-760H22.2 | COL8A1   | -0.580911984 | 0           |
| RP11-760H22.2 | PERP     | -0.521174298 | 0           |
| RP11-760H22.2 | GJA4     | -0.126124272 | 0.008189058 |
| RP11-760H22.2 | IGFL2    | -0.550749943 | 3.47E-36    |
| RP11-760H22.2 | DAPK2    | -0.41206651  | 0           |
| RP11-760H22.2 | MAMLD1   | -0.575089996 | 0           |
| RP11-760H22.2 | ETV5     | -0.33094021  | 1.50E-12    |
| RP11-760H22.2 | RUNX1    | -0.576315185 | 0           |
| RP11-760H22.2 | LONRF2   | -0.275712093 | 4.92E-09    |
| RP11-760H22.2 | SPOCK1   | -0.078426856 | 0.100769818 |
| RP11-760H22.2 | XKRX     | -0.381098642 | 3.35E-17    |
| RP11-760H22.2 | TGFBI    | -0.366661466 | 2.27E-15    |
| RP11-760H22.2 | ERP27    | -0.239778365 | 4.02E-07    |

|               |           |              |          |
|---------------|-----------|--------------|----------|
| RP11-760H22.2 | TNFRSF10C | -0.475431681 | 0        |
| RP11-760H22.2 | PALM      | -0.477480661 | 0        |
| RP11-760H22.2 | TSC22D1   | -0.344130921 | 1.63E-13 |
| RP11-760H22.2 | TGM2      | -0.510902878 | 0        |
| RP11-760H22.2 | UBE2QL1   | -0.315884624 | 1.62E-11 |
| RP11-760H22.2 | ECE1      | -0.4941339   | 0        |
| RP11-760H22.2 | COL8A2    | -0.50843165  | 0        |
| RP11-760H22.2 | HIST3H2A  | -0.358361015 | 1.22E-14 |
| RP11-760H22.2 | TNFRSF21  | -0.403953426 | 0        |
| RP11-760H22.2 | SOX4      | -0.408962688 | 0        |
| RP11-760H22.2 | ELF3      | -0.526595313 | 0        |
| RP11-760H22.2 | TPD52L1   | -0.484019636 | 0        |
| RP11-760H22.2 | INHBB     | -0.329082427 | 2.02E-12 |
| RP11-760H22.2 | HPN       | -0.476427236 | 0        |
| RP11-760H22.2 | MMP7      | -0.444900988 | 9.97E-23 |
| RP11-760H22.2 | RAB27A    | -0.52658893  | 0        |
| RP11-760H22.2 | IGF2BP2   | -0.551709847 | 0        |
| RP11-760H22.2 | ITGB4     | -0.447779398 | 0        |
| RP11-760H22.2 | PPP1R1B   | -0.509573297 | 0        |
| RP11-760H22.2 | NPDC1     | -0.381010561 | 3.52E-17 |
| RP11-760H22.2 | CCL13     | -0.553323582 | 1.41E-36 |
| RP11-760H22.2 | SPINT1    | -0.695484473 | 0        |
| RP11-760H22.2 | HEY2      | -0.4000695   | 0        |
| RP11-760H22.2 | CST2      | -0.390108826 | 2.08E-17 |
| RP11-760H22.2 | ADM       | -0.500369202 | 0        |
| RP11-760H22.2 | VSTM2L    | -0.376477872 | 2.05E-16 |
| RP11-760H22.2 | FAM84A    | -0.487167286 | 0        |
| RP11-760H22.2 | P4HA2     | -0.617583549 | 0        |
| RP11-760H22.2 | LPL       | -0.337268132 | 5.25E-13 |
| RP11-760H22.2 | TMEM173   | -0.485851462 | 0        |
| RP11-760H22.2 | DHRS3     | -0.441546649 | 0        |
| RP11-760H22.2 | SCN1B     | -0.613456798 | 0        |
| RP11-760H22.2 | GLT1D1    | -0.325704434 | 3.48E-12 |
| RP11-760H22.2 | PHYHIP    | -0.604049025 | 0        |
| RP11-760H22.2 | BHLHE40   | -0.551849556 | 0        |
| RP11-760H22.2 | BID       | -0.529455317 | 0        |
| RP11-760H22.2 | POSTN     | -0.40703271  | 0        |
| RP11-760H22.2 | ITGA3     | -0.699945109 | 0        |
| RP11-760H22.2 | RSPO4     | -0.507042072 | 0        |
| RP11-760H22.2 | ADAMTS9   | -0.284257213 | 1.57E-09 |
| RP11-760H22.2 | ABTB2     | -0.574584488 | 0        |
| RP11-760H22.2 | KCNQ3     | -0.5522606   | 0        |
| RP11-760H22.2 | ANXA1     | -0.393234511 | 0        |
| RP11-760H22.2 | S100A11   | -0.643564424 | 0        |
| RP11-760H22.2 | CEACAM6   | -0.447828535 | 4.86E-23 |
| RP11-760H22.2 | IER5L     | -0.546265996 | 0        |
| RP11-760H22.2 | KRT80     | -0.509272319 | 0        |
| RP11-760H22.2 | CDH6      | -0.436865456 | 0        |
| RP11-760H22.2 | UNC5B     | -0.463747989 | 0        |
| RP11-760H22.2 | PLEKHN1   | -0.611722981 | 0        |
| RP11-760H22.2 | SYTL1     | -0.500139142 | 0        |



|               |            |              |             |
|---------------|------------|--------------|-------------|
| RP11-760H22.2 | TMEM163    | -0.354300927 | 2.62E-14    |
| RP11-760H22.2 | C4orf48    | -0.338817561 | 4.04E-13    |
| RP11-760H22.2 | B3GNT7     | -0.45206217  | 0           |
| RP11-760H22.2 | BAIAP3     | -0.440767963 | 0           |
| RP11-760H22.2 | PHLDA2     | -0.599589523 | 0           |
| RP11-760H22.2 | GAP43      | -0.476043732 | 3.27E-26    |
| RP11-760H22.2 | S100A1     | -0.544929039 | 0           |
| RP11-760H22.2 | PTPRE      | -0.585512755 | 0           |
| RP11-760H22.2 | CCND1      | -0.437047008 | 0           |
| RP11-760H22.2 | ST6GALNAC5 | -0.510203983 | 1.81E-30    |
| RP11-760H22.2 | KRT17      | -0.247512602 | 1.64E-07    |
| RP11-760H22.2 | HPCAL4     | -0.404053563 | 0           |
| RP11-760H22.2 | GABBR2     | -0.451915794 | 0           |
| RP11-760H22.2 | DIRAS3     | -0.443752784 | 0           |
| RP11-760H22.2 | SERINC2    | -0.502640582 | 0           |
| RP11-760H22.2 | PTCHD4     | -0.341332049 | 2.64E-13    |
| RP11-760H22.2 | EPS8       | -0.408406403 | 0           |
| RP11-760H22.2 | LY6E       | -0.604635096 | 0           |
| RP11-760H22.2 | UPP1       | -0.531084175 | 0           |
| RP11-760H22.2 | AHNAK2     | -0.621191744 | 0           |
| RP11-760H22.2 | PLXNC1     | -0.56745008  | 0           |
| RP11-760H22.2 | TNC        | -0.49331479  | 0           |
| RP11-760H22.2 | DUSP4      | -0.548222781 | 0           |
| RP11-760H22.2 | NRCAM      | -0.399493641 | 0           |
| RP11-760H22.2 | NRP2       | -0.56937013  | 0           |
| RP11-760H22.2 | CTSC       | -0.628546141 | 0           |
| RP11-760H22.2 | AMIGO2     | -0.352827949 | 3.44E-14    |
| RP11-760H22.2 | NAB2       | -0.472348993 | 0           |
| RP11-760H22.2 | TBC1D2     | -0.550065103 | 0           |
| RP11-760H22.2 | PHLDA3     | -0.555291943 | 0           |
| RP11-760H22.2 | PTP4A3     | -0.53396744  | 0           |
| RP11-760H22.2 | CRABP2     | -0.52822488  | 0           |
| RP11-760H22.2 | GOS2       | -0.510413966 | 0           |
| RP11-760H22.2 | S100A6     | -0.622593237 | 0           |
| RP11-760H22.2 | FOXQ1      | -0.470261718 | 0           |
| RP11-760H22.2 | LRG1       | -0.50651231  | 0           |
| RP11-760H22.2 | LAMP5      | -0.403691737 | 0           |
| RP11-760H22.2 | ALDH3B1    | -0.518308621 | 0           |
| RP11-760H22.2 | CDH2       | -0.032001861 | 0.503491667 |
| RP11-760H22.2 | SCG5       | -0.346345283 | 1.10E-13    |
| RP11-760H22.2 | ZCCHC16    | -0.3948136   | 7.93E-18    |
| RP11-760H22.2 | GRB7       | -0.563203902 | 0           |
| RP11-760H22.2 | TIAM1      | -0.298412133 | 2.17E-10    |
| RP11-760H22.2 | FXYD5      | -0.513128445 | 0           |
| RP11-760H22.2 | CLDN9      | -0.495089173 | 0           |
| RP11-760H22.2 | FAM43A     | -0.54802279  | 0           |
| RP11-760H22.2 | CHST2      | -0.408295486 | 0           |
| RP11-760H22.2 | HMGA2      | -0.573157465 | 0           |
| RP11-760H22.2 | GALNT7     | -0.569050712 | 0           |
| RP11-760H22.2 | CBLN1      | -0.390078776 | 0           |
| RP11-760H22.2 | STRA6      | -0.540591376 | 0           |

|               |         |              |          |
|---------------|---------|--------------|----------|
| RP11-760H22.2 | MUC21   | -0.588473518 | 2.95E-42 |
| RP11-760H22.2 | PRR36   | -0.561228678 | 0        |
| RP11-760H22.2 | NFE2L3  | -0.508722984 | 0        |
| RP11-760H22.2 | NR1D1   | -0.376746653 | 1.89E-16 |
| RP11-760H22.2 | MUC1    | -0.566301341 | 0        |
| RP11-760H22.2 | NAT8L   | -0.31052318  | 3.66E-11 |
| RP11-760H22.2 | APOC1   | -0.206006661 | 1.42E-05 |
| RP11-760H22.2 | EVA1A   | -0.48183889  | 0        |
| RP11-760H22.2 | ENTPD1  | -0.231334234 | 1.03E-06 |
| RP11-760H22.2 | COL1A1  | -0.501804877 | 0        |
| RP11-760H22.2 | FNDC4   | -0.44682143  | 0        |
| RP11-760H22.2 | FRMD3   | -0.254985859 | 6.74E-08 |
| RP11-760H22.2 | SHROOM4 | -0.538781959 | 0        |
| RP11-760H22.2 | NELL2   | -0.290692222 | 6.47E-10 |
| RP11-760H22.2 | EPHB3   | -0.596992202 | 0        |
| RP11-760H22.2 | TMC6    | -0.680071174 | 0        |
| RP11-760H22.2 | NOD1    | -0.474903905 | 0        |
| RP11-760H22.2 | GGCT    | -0.590529393 | 0        |
| RP11-760H22.2 | ICAM1   | -0.578659469 | 0        |
| RP11-760H22.2 | PRSS23  | -0.481133959 | 0        |
| RP11-760H22.2 | CFI     | -0.541626078 | 0        |
| RP11-760H22.2 | CD55    | -0.463772669 | 0        |
| RP11-760H22.2 | RASD2   | -0.383642633 | 0        |
| RP11-760H22.2 | KLK11   | -0.325688732 | 2.63E-12 |
| RP11-760H22.2 | ICAM5   | -0.44213272  | 0        |
| RP11-760H22.2 | ADORA1  | -0.649534065 | 0        |
| RP11-760H22.2 | ITGA2   | -0.512976821 | 0        |
| RP11-760H22.2 | ABCC3   | -0.406121832 | 0        |
| RP11-760H22.2 | MFGE8   | -0.599014799 | 0        |
| RP11-760H22.2 | STK32A  | -0.397293606 | 0        |
| RP11-760H22.2 | CYSLTR2 | -0.256975834 | 5.29E-08 |
| RP11-760H22.2 | LAD1    | -0.701942885 | 0        |
| RP11-760H22.2 | MGAT3   | -0.373670773 | 4.45E-16 |
| RP11-760H22.2 | IGFBP6  | -0.537589818 | 0        |
| RP11-760H22.2 | CYP2S1  | -0.525236088 | 0        |
| RP11-760H22.2 | KCNJ2   | -0.497173044 | 0        |
| RP11-760H22.2 | FAM20A  | -0.506785347 | 0        |
| RP11-760H22.2 | TGFA    | -0.524263653 | 0        |
| RP11-760H22.2 | MXRA8   | -0.531265017 | 0        |
| RP11-760H22.2 | C8orf4  | -0.376758    | 1.88E-16 |
| RP11-760H22.2 | CLDN10  | -0.532804034 | 1.47E-33 |
| RP11-760H22.2 | PDE5A   | -0.530568739 | 0        |
| RP11-760H22.2 | APOE    | -0.239048046 | 4.36E-07 |
| RP11-760H22.2 | SPOCK2  | -0.390159765 | 0        |
| RP11-760H22.2 | TENM1   | -0.380073727 | 5.64E-17 |
| RP11-760H22.2 | SLIT1   | -0.346605696 | 1.05E-13 |
| RP11-760H22.2 | CXCL14  | -0.264064428 | 2.20E-08 |
| RP11-760H22.2 | ECM1    | -0.365693286 | 2.79E-15 |
| RP11-760H22.2 | DUSP5   | -0.503335158 | 0        |
| RP11-760H22.2 | SEZ6L2  | -0.589949137 | 0        |
| RP11-760H22.2 | THRSP   | -0.360400775 | 8.18E-15 |

|               |           |              |             |
|---------------|-----------|--------------|-------------|
| RP11-760H22.2 | C19orf33  | -0.465627899 | 0           |
| RP11-760H22.2 | MPZL2     | -0.555675613 | 0           |
| RP11-760H22.2 | CTSH      | -0.56591214  | 0           |
| RP11-760H22.2 | CYP1B1    | -0.607999614 | 0           |
| RP11-760H22.2 | ALOX5     | -0.571195574 | 0           |
| RP11-760H22.2 | SYTL5     | -0.405930296 | 7.62E-19    |
| RP11-760H22.2 | TNFRSF12A | -0.478928534 | 0           |
| RP11-760H22.2 | DUSP6     | -0.36544961  | 2.94E-15    |
| RP11-760H22.2 | ALOX15B   | -0.59222846  | 0           |
| RP11-760H22.2 | SDC4      | -0.558652349 | 0           |
| RP11-760H22.2 | MDK       | -0.470444404 | 0           |
| RP11-760H22.2 | KRT19     | -0.55891106  | 0           |
| RP11-760H22.2 | MET       | -0.589431715 | 0           |
| RP11-760H22.2 | TESC      | -0.350631601 | 5.13E-14    |
| RP11-760H22.2 | CXCL17    | -0.681749273 | 2.70E-61    |
| RP11-760H22.2 | NPC2      | -0.577763626 | 0           |
| RP11-760H22.2 | COMP      | -0.423333343 | 0           |
| RP11-760H22.2 | TUSC3     | -0.409707475 | 0           |
| RP11-760H22.2 | TMPRSS4   | -0.565415852 | 0           |
| RP11-760H22.2 | LGALS3    | -0.599544135 | 0           |
| RP11-760H22.2 | CRLF1     | -0.296369962 | 2.91E-10    |
| RP11-760H22.2 | CTXN1     | -0.427753271 | 0           |
| RP11-760H22.2 | PCSK1N    | -0.245268171 | 2.14E-07    |
| RP11-760H22.2 | NMU       | -0.472371754 | 8.80E-26    |
| RP11-760H22.2 | GALE      | -0.691788765 | 0           |
| RP11-760H22.2 | PCSK2     | -0.250818684 | 1.11E-07    |
| RP11-760H22.2 | GJB3      | -0.520826371 | 0           |
| RP11-760H22.2 | SLPI      | -0.46105975  | 0           |
| RP11-760H22.2 | AGR2      | -0.156795984 | 0.000992215 |
| RP11-760H22.2 | MRC2      | -0.460017531 | 0           |
| RP11-760H22.2 | GOLT1A    | -0.577080112 | 0           |
| RP11-760H22.2 | SLC27A6   | -0.382846727 | 8.97E-17    |
| RP11-760H22.2 | KCNN4     | -0.631585711 | 0           |
| RP11-760H22.2 | ETV4      | -0.338061439 | 3.38E-13    |
| RP11-760H22.2 | SYT12     | -0.624461373 | 0           |
| RP11-760H22.2 | PVRL4     | -0.706688046 | 0           |
| RP11-760H22.2 | PLCD3     | -0.522499908 | 0           |
| RP11-760H22.2 | PLAU      | -0.657185895 | 0           |
| RP11-760H22.2 | LRRK2     | -0.371560095 | 7.53E-16    |
| RP11-760H22.2 | SFN       | -0.57536133  | 0           |
| RP11-760H22.2 | LPAR5     | -0.555965812 | 0           |
| RP11-760H22.2 | NGEF      | -0.60117895  | 0           |
| RP11-760H22.2 | DTX4      | -0.480433568 | 0           |
| RP11-760H22.2 | CST6      | -0.528086305 | 0           |
| RP11-760H22.2 | QPCT      | -0.593589245 | 0           |
| RP11-760H22.2 | TIMP1     | -0.607959758 | 0           |
| RP11-760H22.2 | CAMK2N1   | -0.579333337 | 0           |
| RP11-760H22.2 | KLHDC8A   | -0.284137928 | 1.59E-09    |
| RP11-760H22.2 | PDLIM4    | -0.653195591 | 0           |
| RP11-760H22.2 | SCEL      | -0.480799791 | 0           |
| RP11-760H22.2 | LCN2      | -0.595475537 | 0           |

|               |          |              |          |
|---------------|----------|--------------|----------|
| RP11-760H22.2 | PROS1    | -0.63089312  | 0        |
| RP11-760H22.2 | GABRB2   | -0.529021012 | 0        |
| RP11-760H22.2 | TMPRSS6  | -0.595609857 | 0        |
| RP11-760H22.2 | KLK7     | -0.442059842 | 1.99E-22 |
| RP11-760H22.2 | PDZK1IP1 | -0.617458874 | 0        |
| RP11-760H22.2 | CDH3     | -0.469581183 | 0        |
| RP11-760H22.2 | LRP4     | -0.373293203 | 4.91E-16 |
| RP11-760H22.2 | IGSF1    | -0.23147295  | 1.01E-06 |
| RP11-760H22.2 | B3GNT3   | -0.559628188 | 0        |
| RP11-760H22.2 | CLDN1    | -0.545288596 | 0        |
| RP11-760H22.2 | GDF15    | -0.565000128 | 0        |
| RP11-760H22.2 | ARHGAP36 | -0.257860718 | 4.25E-08 |
| RP11-760H22.2 | LAMB3    | -0.528538907 | 0        |
| RP11-760H22.2 | KLK10    | -0.480668592 | 0        |
| RP11-760H22.2 | DPP4     | -0.492994239 | 0        |
| RP11-760H22.2 | METTL7B  | -0.521915681 | 0        |
| RP11-760H22.2 | LIPH     | -0.64953364  | 0        |
| RP11-760H22.2 | CLDN16   | -0.511727378 | 0        |
| RP11-760H22.2 | CHI3L1   | -0.678256793 | 0        |
| RP11-760H22.2 | SLC22A31 | -0.570459996 | 2.93E-39 |
| RP11-760H22.2 | TACSTD2  | -0.590512514 | 0        |
| RP11-760H22.2 | SFTPB    | -0.557074127 | 0        |
| RP11-760H22.2 | RXRG     | -0.481961721 | 0        |
| RP11-760H22.2 | DCSTAMP  | -0.657950008 | 8.65E-56 |
| RP11-760H22.2 | CITED1   | -0.634918883 | 0        |
| RP11-760H22.2 | SERPINA1 | -0.732856713 | 0        |
| RP11-760H22.2 | PRR15    | -0.44476465  | 0        |
| RP11-760H22.2 | SLC34A2  | -0.631941722 | 0        |
| RP11-760H22.2 | FN1      | -0.684539611 | 0        |
| RP11-760H22.2 | ZCCHC12  | -0.233571572 | 8.05E-07 |
| RP3-483K16.4  | TFF3     | 0.73106643   | 1.46E-74 |
| RP3-483K16.4  | CCL21    | 0.551513041  | 2.66E-36 |
| RP3-483K16.4  | TPO      | 0.696630247  | 5.17E-65 |
| RP3-483K16.4  | MT1G     | 0.596273402  | 1.30E-43 |
| RP3-483K16.4  | DIO1     | 0.592658466  | 5.58E-43 |
| RP3-483K16.4  | DPT      | 0.504501262  | 1.01E-29 |
| RP3-483K16.4  | CDH16    | 0.636020683  | 3.84E-51 |
| RP3-483K16.4  | CRABP1   | 0.667904624  | 4.96E-58 |
| RP3-483K16.4  | SLC26A7  | 0.684610173  | 5.41E-62 |
| RP3-483K16.4  | MT1H     | 0.572711683  | 1.26E-39 |
| RP3-483K16.4  | SLC26A4  | 0.706818492  | 1.08E-67 |
| RP3-483K16.4  | SLC5A8   | 0.603763714  | 5.96E-45 |
| RP3-483K16.4  | PKHD1L1  | 0.608488008  | 8.18E-46 |
| RP3-483K16.4  | TFCP2L1  | 0.605679981  | 2.67E-45 |
| RP3-483K16.4  | WSCD2    | 0.735517808  | 6.65E-76 |
| RP3-483K16.4  | IPCEF1   | 0.622125663  | 2.19E-48 |
| RP3-483K16.4  | SLC5A5   | 0.599018943  | 4.23E-44 |
| RP3-483K16.4  | MT1F     | 0.619393309  | 7.34E-48 |
| RP3-483K16.4  | FOSB     | 0.593437223  | 4.08E-43 |
| RP3-483K16.4  | SEMA3D   | 0.67845109   | 1.68E-60 |
| RP3-483K16.4  | BMP8A    | 0.671941052  | 5.78E-59 |

|              |           |             |          |
|--------------|-----------|-------------|----------|
| RP3-483K16.4 | MATN2     | 0.629232137 | 8.88E-50 |
| RP3-483K16.4 | PLA2R1    | 0.573363486 | 9.90E-40 |
| RP3-483K16.4 | COL23A1   | 0.663473365 | 5.06E-57 |
| RP3-483K16.4 | HGD       | 0.671942684 | 5.78E-59 |
| RP3-483K16.4 | TCEAL2    | 0.521978879 | 4.75E-32 |
| RP3-483K16.4 | CHRD1     | 0.47009105  | 1.62E-25 |
| RP3-483K16.4 | TNFRSF11B | 0.496206118 | 1.15E-28 |
| RP3-483K16.4 | FAM167A   | 0.670036248 | 1.60E-58 |
| RP3-483K16.4 | KIT       | 0.670343397 | 1.36E-58 |
| RP3-483K16.4 | SLC4A4    | 0.628065171 | 1.51E-49 |
| RP3-483K16.4 | SMOC2     | 0.610129418 | 4.07E-46 |
| RP3-483K16.4 | FHL1      | 0.690365648 | 2.02E-63 |
| RP3-483K16.4 | OTOS      | 0.620244971 | 5.04E-48 |
| RP3-483K16.4 | IGFBPL1   | 0.628164333 | 1.44E-49 |
| RP3-483K16.4 | HBB       | 0.492865708 | 3.01E-28 |
| RP3-483K16.4 | BEX1      | 0.559058555 | 1.86E-37 |
| RP3-483K16.4 | FABP4     | 0.678566015 | 1.58E-60 |
| RP3-483K16.4 | LMOD1     | 0.773998598 | 9.15E-89 |
| RP3-483K16.4 | SOD3      | 0.580803491 | 5.87E-41 |
| RP3-483K16.4 | TMEM171   | 0.568569881 | 5.89E-39 |
| RP3-483K16.4 | PI16      | 0.606261869 | 2.09E-45 |
| RP3-483K16.4 | ZMAT4     | 0.677468046 | 2.88E-60 |
| RP3-483K16.4 | MFAP4     | 0.520589653 | 7.35E-32 |
| RP3-483K16.4 | CWH43     | 0.539458218 | 1.63E-34 |
| RP3-483K16.4 | SPX       | 0.685540201 | 3.20E-62 |
| RP3-483K16.4 | APOD      | 0.456762227 | 5.17E-24 |
| RP3-483K16.4 | DPP6      | 0.677124851 | 3.48E-60 |
| RP3-483K16.4 | MMRN1     | 0.543219583 | 4.59E-35 |
| RP3-483K16.4 | WDR72     | 0.541310524 | 8.74E-35 |
| RP3-483K16.4 | MPPED2    | 0.762563248 | 1.09E-84 |
| RP3-483K16.4 | PAPSS2    | 0.570368662 | 3.03E-39 |
| RP3-483K16.4 | DCN       | 0.374181639 | 4.89E-16 |
| RP3-483K16.4 | SORBS2    | 0.671336045 | 8.00E-59 |
| RP3-483K16.4 | EGR2      | 0.575111205 | 5.13E-40 |
| RP3-483K16.4 | EDN3      | 0.615100527 | 4.80E-47 |
| RP3-483K16.4 | DIO2      | 0.604298557 | 4.77E-45 |
| RP3-483K16.4 | ITPR1     | 0.677507599 | 2.82E-60 |
| RP3-483K16.4 | CFD       | 0.429843917 | 3.62E-21 |
| RP3-483K16.4 | CPXM1     | 0.571074586 | 2.33E-39 |
| RP3-483K16.4 | ELMO1     | 0.717511394 | 1.24E-70 |
| RP3-483K16.4 | GPC3      | 0.629080074 | 9.51E-50 |
| RP3-483K16.4 | MYOC      | 0.528766626 | 5.45E-33 |
| RP3-483K16.4 | DEPTOR    | 0.60302734  | 8.09E-45 |
| RP3-483K16.4 | DGKI      | 0.604172534 | 5.02E-45 |
| RP3-483K16.4 | CARTPT    | 0.658758503 | 5.73E-56 |
| RP3-483K16.4 | IYD       | 0.441494717 | 2.28E-22 |
| RP3-483K16.4 | LYVE1     | 0.557282326 | 3.50E-37 |
| RP3-483K16.4 | CLCNKB    | 0.676853588 | 4.03E-60 |
| RP3-483K16.4 | NCAM1     | 0.391247362 | 1.65E-17 |
| RP3-483K16.4 | HBA2      | 0.483674792 | 4.03E-27 |
| RP3-483K16.4 | GLT8D2    | 0.695361441 | 1.09E-64 |

|              |            |             |          |
|--------------|------------|-------------|----------|
| RP3-483K16.4 | OGDHL      | 0.469521202 | 1.88E-25 |
| RP3-483K16.4 | LIFR       | 0.61919424  | 8.01E-48 |
| RP3-483K16.4 | CSGALNACT1 | 0.4422044   | 1.92E-22 |
| RP3-483K16.4 | RAP1GAP    | 0.527329833 | 8.65E-33 |
| RP3-483K16.4 | COL9A3     | 0.642736254 | 1.59E-52 |
| RP3-483K16.4 | FBLN1      | 0.382630887 | 9.36E-17 |
| RP3-483K16.4 | EFEMP1     | 0.442107738 | 1.97E-22 |
| RP3-483K16.4 | AOX1       | 0.609844914 | 4.59E-46 |
| RP3-483K16.4 | GRIN2C     | 0.638368516 | 1.27E-51 |
| RP3-483K16.4 | C11orf74   | 0.692506682 | 5.83E-64 |
| RP3-483K16.4 | PPARGC1A   | 0.545317427 | 2.25E-35 |
| RP3-483K16.4 | ANGPTL1    | 0.63930911  | 8.16E-52 |
| RP3-483K16.4 | SCARA5     | 0.511750161 | 1.13E-30 |
| RP3-483K16.4 | LTF        | 0.639050186 | 9.23E-52 |
| RP3-483K16.4 | CA4        | 0.715530216 | 4.45E-70 |
| RP3-483K16.4 | TG         | 0.655185811 | 3.50E-55 |
| RP3-483K16.4 | FCGBP      | 0.667211629 | 7.16E-58 |
| RP3-483K16.4 | PBX4       | 0.738407007 | 8.64E-77 |
| RP3-483K16.4 | CYR61      | 0.606609299 | 1.81E-45 |
| RP3-483K16.4 | FOS        | 0.553562856 | 1.30E-36 |
| RP3-483K16.4 | KHDRBS2    | 0.691083983 | 1.33E-63 |
| RP3-483K16.4 | MUM1L1     | 0.498836916 | 5.35E-29 |
| RP3-483K16.4 | RGS16      | 0.661619622 | 1.32E-56 |
| RP3-483K16.4 | MT1M       | 0.588165982 | 3.33E-42 |
| RP3-483K16.4 | LRP2       | 0.545791093 | 1.91E-35 |
| RP3-483K16.4 | MAFB       | 0.620047533 | 5.50E-48 |
| RP3-483K16.4 | KCNK2      | 0.577933413 | 1.76E-40 |
| RP3-483K16.4 | TBC1D4     | 0.660646619 | 2.18E-56 |
| RP3-483K16.4 | MIOX       | 0.685554586 | 3.17E-62 |
| RP3-483K16.4 | TPPP       | 0.629830336 | 6.75E-50 |
| RP3-483K16.4 | FMOD       | 0.554251334 | 1.02E-36 |
| RP3-483K16.4 | CITED2     | 0.443218253 | 1.50E-22 |
| RP3-483K16.4 | RGS8       | 0.741843914 | 7.36E-78 |
| RP3-483K16.4 | ABI3BP     | 0.385004251 | 5.84E-17 |
| RP3-483K16.4 | ADH1B      | 0.527523637 | 8.13E-33 |
| RP3-483K16.4 | OGN        | 0.451332315 | 2.03E-23 |
| RP3-483K16.4 | NR4A1      | 0.530616345 | 2.99E-33 |
| RP3-483K16.4 | FOXJ1      | 0.737902734 | 1.24E-76 |
| RP3-483K16.4 | ALDH1A1    | 0.583259333 | 2.27E-41 |
| RP3-483K16.4 | OCA2       | 0.56814599  | 6.89E-39 |
| RP3-483K16.4 | TMEM139    | 0.41554622  | 9.33E-20 |
| RP3-483K16.4 | ARHGAP24   | 0.654431166 | 5.11E-55 |
| RP3-483K16.4 | SLC25A15   | 0.472407874 | 8.71E-26 |
| RP3-483K16.4 | DES        | 0.451996155 | 1.72E-23 |
| RP3-483K16.4 | GDF10      | 0.631604956 | 2.99E-50 |
| RP3-483K16.4 | KIAA1324   | 0.61441723  | 6.45E-47 |
| RP3-483K16.4 | JUN        | 0.584897341 | 1.20E-41 |
| RP3-483K16.4 | C7         | 0.272422448 | 6.56E-09 |
| RP3-483K16.4 | LGI3       | 0.628805632 | 1.08E-49 |
| RP3-483K16.4 | CDON       | 0.656152362 | 2.15E-55 |
| RP3-483K16.4 | BCL2       | 0.548910166 | 6.56E-36 |

|              |          |             |          |
|--------------|----------|-------------|----------|
| RP3-483K16.4 | HLF      | 0.638304477 | 1.31E-51 |
| RP3-483K16.4 | EGR1     | 0.564281501 | 2.83E-38 |
| RP3-483K16.4 | IP6K3    | 0.51431321  | 5.17E-31 |
| RP3-483K16.4 | SCUBE3   | 0.591825668 | 7.79E-43 |
| RP3-483K16.4 | PKNOX2   | 0.688743029 | 5.15E-63 |
| RP3-483K16.4 | SMAD9    | 0.412597068 | 1.79E-19 |
| RP3-483K16.4 | IQGAP2   | 0.507520196 | 4.08E-30 |
| RP3-483K16.4 | GNA14    | 0.64008567  | 5.64E-52 |
| RP3-483K16.4 | LAYN     | 0.699417988 | 9.80E-66 |
| RP3-483K16.4 | AVPR1A   | 0.696732228 | 4.86E-65 |
| RP3-483K16.4 | PDLIM3   | 0.570460643 | 2.93E-39 |
| RP3-483K16.4 | GPM6A    | 0.577183235 | 2.34E-40 |
| RP3-483K16.4 | SDPR     | 0.65585422  | 2.50E-55 |
| RP3-483K16.4 | CRYAB    | 0.307286838 | 4.71E-11 |
| RP3-483K16.4 | FOXA2    | 0.635461475 | 4.99E-51 |
| RP3-483K16.4 | C8orf88  | 0.588162294 | 3.34E-42 |
| RP3-483K16.4 | ISM1     | 0.533679038 | 1.10E-33 |
| RP3-483K16.4 | BMP2     | 0.486886201 | 1.64E-27 |
| RP3-483K16.4 | ID4      | 0.585957149 | 7.94E-42 |
| RP3-483K16.4 | NUPR1    | 0.287009352 | 9.03E-10 |
| RP3-483K16.4 | SERTM1   | 0.428781445 | 4.64E-21 |
| RP3-483K16.4 | IRS1     | 0.604533794 | 4.32E-45 |
| RP3-483K16.4 | FIBIN    | 0.349041614 | 5.05E-14 |
| RP3-483K16.4 | PODN     | 0.427645722 | 6.03E-21 |
| RP3-483K16.4 | TDRD9    | 0.453390612 | 1.21E-23 |
| RP3-483K16.4 | EPHA3    | 0.549604602 | 5.16E-36 |
| RP3-483K16.4 | AIF1L    | 0.490535817 | 5.85E-28 |
| RP3-483K16.4 | EBF4     | 0.619403237 | 7.30E-48 |
| RP3-483K16.4 | ADM2     | 0.469961748 | 1.67E-25 |
| RP3-483K16.4 | GSTM3    | 0.624551364 | 7.39E-49 |
| RP3-483K16.4 | HSD17B6  | 0.526547387 | 1.11E-32 |
| RP3-483K16.4 | AGR3     | 0.508617058 | 2.93E-30 |
| RP3-483K16.4 | EPHB1    | 0.463925152 | 8.19E-25 |
| RP3-483K16.4 | TMOD1    | 0.428394481 | 5.07E-21 |
| RP3-483K16.4 | WASF3    | 0.580046718 | 7.85E-41 |
| RP3-483K16.4 | SELV     | 0.601497519 | 1.53E-44 |
| RP3-483K16.4 | ENPP1    | 0.386816719 | 4.06E-17 |
| RP3-483K16.4 | SYNE1    | 0.656941284 | 1.44E-55 |
| RP3-483K16.4 | PLCH1    | 0.636614343 | 2.91E-51 |
| RP3-483K16.4 | CCDC146  | 0.682847774 | 1.46E-61 |
| RP3-483K16.4 | SLC16A2  | 0.685403044 | 3.46E-62 |
| RP3-483K16.4 | IER2     | 0.632854662 | 1.68E-50 |
| RP3-483K16.4 | KCNAB1   | 0.6720258   | 5.53E-59 |
| RP3-483K16.4 | SYNDIG1  | 0.612014152 | 1.82E-46 |
| RP3-483K16.4 | C16orf89 | 0.665905449 | 1.42E-57 |
| RP3-483K16.4 | CTGF     | 0.502765101 | 1.69E-29 |
| RP3-483K16.4 | NR4A3    | 0.399919153 | 2.73E-18 |
| RP3-483K16.4 | KIAA1456 | 0.55188336  | 2.34E-36 |
| RP3-483K16.4 | AQP4     | 0.542320192 | 6.22E-35 |
| RP3-483K16.4 | RNF150   | 0.673515305 | 2.48E-59 |
| RP3-483K16.4 | C1S      | 0.242091037 | 2.83E-07 |

|              |          |             |             |
|--------------|----------|-------------|-------------|
| RP3-483K16.4 | PFKFB2   | 0.421949891 | 2.22E-20    |
| RP3-483K16.4 | PROX1    | 0.635052006 | 6.04E-51    |
| RP3-483K16.4 | TCF7L1   | 0.733997357 | 1.93E-75    |
| RP3-483K16.4 | HSPB6    | 0.594694115 | 2.46E-43    |
| RP3-483K16.4 | FHDC1    | 0.529617243 | 4.14E-33    |
| RP3-483K16.4 | PRR15L   | 0.501715646 | 2.30E-29    |
| RP3-483K16.4 | SLC1A1   | 0.363203502 | 3.90E-15    |
| RP3-483K16.4 | BTBD11   | 0.706295467 | 1.49E-67    |
| RP3-483K16.4 | TRIM58   | 0.419323986 | 4.02E-20    |
| RP3-483K16.4 | LRIG1    | 0.524895905 | 1.88E-32    |
| RP3-483K16.4 | ROR2     | 0.457993516 | 3.78E-24    |
| RP3-483K16.4 | GPR125   | 0.615732984 | 3.64E-47    |
| RP3-483K16.4 | FLRT1    | 0.694103912 | 2.29E-64    |
| RP3-483K16.4 | PGF      | 0.64906695  | 7.34E-54    |
| RP3-483K16.4 | DUSP1    | 0.504714158 | 9.45E-30    |
| RP3-483K16.4 | PLA2G7   | 0.494144725 | 2.09E-28    |
| RP3-483K16.4 | PLSCR4   | 0.51223345  | 9.78E-31    |
| RP3-483K16.4 | FAM46B   | 0.452943966 | 1.36E-23    |
| RP3-483K16.4 | GLDC     | 0.497978233 | 6.87E-29    |
| RP3-483K16.4 | ZBTB16   | 0.470762916 | 1.35E-25    |
| RP3-483K16.4 | OMD      | 0.374027061 | 5.04E-16    |
| RP3-483K16.4 | HSD11B2  | 0.711548482 | 5.62E-69    |
| RP3-483K16.4 | FGL2     | 0.313596897 | 1.79E-11    |
| RP3-483K16.4 | CLCNKA   | 0.658331644 | 7.12E-56    |
| RP3-483K16.4 | GATM     | 0.47893388  | 1.49E-26    |
| RP3-483K16.4 | TNS3     | 0.463787003 | 8.49E-25    |
| RP3-483K16.4 | TOB1     | 0.468095595 | 2.74E-25    |
| RP3-483K16.4 | MARC2    | 0.621462644 | 2.94E-48    |
| RP3-483K16.4 | LRRC2    | 0.447561666 | 5.19E-23    |
| RP3-483K16.4 | SORD     | 0.438601094 | 4.58E-22    |
| RP3-483K16.4 | RIMS4    | 0.587753093 | 3.92E-42    |
| RP3-483K16.4 | SLC29A4  | 0.674549724 | 1.42E-59    |
| RP3-483K16.4 | SLC39A14 | 0.497823631 | 7.19E-29    |
| RP3-483K16.4 | FAXDC2   | 0.62339     | 1.24E-48    |
| RP3-483K16.4 | HSPB8    | 0.300018315 | 1.39E-10    |
| RP3-483K16.4 | CCL19    | 0.14659707  | 0.002073864 |
| RP3-483K16.4 | KCNIP3   | 0.637267575 | 2.14E-51    |
| RP3-483K16.4 | CGNL1    | 0.548276721 | 8.16E-36    |
| RP3-483K16.4 | ATF3     | 0.32857981  | 1.64E-12    |
| RP3-483K16.4 | SGCD     | 0.372045072 | 7.37E-16    |
| RP3-483K16.4 | STARD13  | 0.590202978 | 1.49E-42    |
| RP3-483K16.4 | LDHD     | 0.621839719 | 2.48E-48    |
| RP3-483K16.4 | RCAN1    | 0.49531233  | 1.49E-28    |
| RP3-483K16.4 | ID3      | 0.380349718 | 1.47E-16    |
| RP3-483K16.4 | SYTL3    | 0.639601721 | 7.10E-52    |
| RP3-483K16.4 | MT1E     | 0.430145321 | 3.38E-21    |
| RP3-483K16.4 | CAMK1D   | 0.645158907 | 4.95E-53    |
| RP3-483K16.4 | PRKCQ    | 0.620837993 | 3.87E-48    |
| RP3-483K16.4 | NUAK2    | 0.409944355 | 3.20E-19    |
| RP3-483K16.4 | LIPG     | 0.620609351 | 4.29E-48    |
| RP3-483K16.4 | SLC25A25 | 0.405038061 | 9.22E-19    |



|              |          |             |             |
|--------------|----------|-------------|-------------|
| RP3-483K16.4 | PRKX     | 0.356340349 | 1.37E-14    |
| RP3-483K16.4 | SRPX     | 0.394211903 | 8.98E-18    |
| RP3-483K16.4 | FAM189A1 | 0.675248344 | 9.68E-60    |
| RP3-483K16.4 | PLEKHH1  | 0.566270698 | 1.37E-38    |
| RP3-483K16.4 | WNT11    | 0.644699779 | 6.18E-53    |
| RP3-483K16.4 | SNAI1    | 0.524799952 | 1.94E-32    |
| RP3-483K16.4 | FDCSP    | 0.147467569 | 0.001948754 |
| RP3-483K16.4 | MT1X     | 0.493910127 | 2.23E-28    |
| RP3-483K16.4 | ACACB    | 0.621518244 | 2.87E-48    |
| RP3-483K16.4 | ARC      | 0.45352635  | 1.17E-23    |
| RP3-483K16.4 | KLK4     | 0.27493405  | 4.70E-09    |
| RP3-483K16.4 | ZFPM2    | 0.509280752 | 2.40E-30    |
| RP3-483K16.4 | AKAP12   | 0.472056827 | 9.57E-26    |
| RP3-483K16.4 | GJB6     | 0.464889003 | 6.37E-25    |
| RP3-483K16.4 | ERO1LB   | 0.588959136 | 2.44E-42    |
| RP3-483K16.4 | DNALI1   | 0.6321659   | 2.31E-50    |
| RP3-483K16.4 | HKDC1    | 0.38883017  | 2.70E-17    |
| RP3-483K16.4 | ZFP36L2  | 0.524371036 | 2.23E-32    |
| RP3-483K16.4 | CAPSL    | 0.711378558 | 6.26E-69    |
| RP3-483K16.4 | CYP7B1   | 0.519557219 | 1.02E-31    |
| RP3-483K16.4 | CPQ      | 0.583098915 | 2.42E-41    |
| RP3-483K16.4 | RPS6KA6  | 0.626143723 | 3.61E-49    |
| RP3-483K16.4 | TLE1     | 0.546431489 | 1.54E-35    |
| RP3-483K16.4 | TP53INP2 | 0.660304507 | 2.60E-56    |
| RP3-483K16.4 | KATNAL2  | 0.655846773 | 2.51E-55    |
| RP3-483K16.4 | SGPP2    | 0.209381226 | 9.70E-06    |
| RP3-483K16.4 | CTH      | 0.517665535 | 1.83E-31    |
| RP3-483K16.4 | KIF12    | 0.465229063 | 5.82E-25    |
| RP3-483K16.4 | TMEM220  | 0.595373232 | 1.87E-43    |
| RP3-483K16.4 | CENPJ    | 0.538639798 | 2.14E-34    |
| RP3-483K16.4 | FAM155B  | 0.518410181 | 1.45E-31    |
| RP3-483K16.4 | WFS1     | 0.531781893 | 2.05E-33    |
| RP3-483K16.4 | SELENBP1 | 0.642569028 | 1.72E-52    |
| RP3-483K16.4 | SNTA1    | 0.483914213 | 3.77E-27    |
| RP3-483K16.4 | FRAS1    | 0.215622138 | 5.15E-06    |
| RP3-483K16.4 | FBLN7    | 0.560583306 | 1.08E-37    |
| RP3-483K16.4 | AGPAT9   | 0.538455126 | 2.27E-34    |
| RP3-483K16.4 | GPR83    | 0.536292036 | 4.66E-34    |
| RP3-483K16.4 | PRTG     | 0.509488685 | 2.25E-30    |
| RP3-483K16.4 | EGR3     | 0.460970894 | 1.76E-24    |
| RP3-483K16.4 | GRAMD2   | 0.392741121 | 1.22E-17    |
| RP3-483K16.4 | HYOU1    | 0.502192787 | 2.00E-29    |
| RP3-483K16.4 | FBLN5    | 0.54792383  | 9.21E-36    |
| RP3-483K16.4 | ITM2A    | 0.624841351 | 6.49E-49    |
| RP3-483K16.4 | SRF      | 0.643599831 | 1.05E-52    |
| RP3-483K16.4 | FGFR2    | 0.495985348 | 1.23E-28    |
| RP3-483K16.4 | MT1A     | 0.433492413 | 1.54E-21    |
| RP3-483K16.4 | MAMDC2   | 0.458380165 | 3.42E-24    |
| RP3-483K16.4 | FHL2     | 0.468673795 | 2.35E-25    |
| RP3-483K16.4 | FTCDNL1  | 0.472408513 | 8.71E-26    |
| RP3-483K16.4 | PKIA     | 0.527747544 | 7.57E-33    |

|              |          |             |             |
|--------------|----------|-------------|-------------|
| RP3-483K16.4 | DNAJB4   | 0.527605139 | 7.92E-33    |
| RP3-483K16.4 | SLC25A33 | 0.649685857 | 5.41E-54    |
| RP3-483K16.4 | EYA2     | 0.379609185 | 1.70E-16    |
| RP3-483K16.4 | LPAR1    | 0.282132205 | 1.78E-09    |
| RP3-483K16.4 | STX11    | 0.294574599 | 3.08E-10    |
| RP3-483K16.4 | ARHGEF28 | 0.384647317 | 6.27E-17    |
| RP3-483K16.4 | OR2W3    | 0.483838543 | 3.85E-27    |
| RP3-483K16.4 | ALDH1B1  | 0.462185534 | 1.29E-24    |
| RP3-483K16.4 | CXCL12   | 0.399965463 | 2.71E-18    |
| RP3-483K16.4 | OLFM2    | 0.620712183 | 4.10E-48    |
| RP3-483K16.4 | TUB      | 0.458027983 | 3.75E-24    |
| RP3-483K16.4 | HTRA3    | 0.498357577 | 6.15E-29    |
| RP3-483K16.4 | CKB      | 0.471833008 | 1.02E-25    |
| RP3-483K16.4 | RGS2     | 0.268212362 | 1.14E-08    |
| RP3-483K16.4 | SHANK2   | 0.642170749 | 2.09E-52    |
| RP3-483K16.4 | CNTFR    | 0.64507187  | 5.16E-53    |
| RP3-483K16.4 | CYTH3    | 0.653684392 | 7.44E-55    |
| RP3-483K16.4 | PLAC9    | 0.629195685 | 9.03E-50    |
| RP3-483K16.4 | WVOX     | 0.659904739 | 3.19E-56    |
| RP3-483K16.4 | NPR3     | 0.510012703 | 1.92E-30    |
| RP3-483K16.4 | SDC2     | 0.499230302 | 4.77E-29    |
| RP3-483K16.4 | KLF15    | 0.538698519 | 2.10E-34    |
| RP3-483K16.4 | TMEM164  | 0.546542689 | 1.48E-35    |
| RP3-483K16.4 | LONRF3   | 0.377854445 | 2.40E-16    |
| RP3-483K16.4 | GBP1     | 0.229274617 | 1.20E-06    |
| RP3-483K16.4 | ARHGAP6  | 0.462993352 | 1.04E-24    |
| RP3-483K16.4 | TMEM119  | 0.36811625  | 1.55E-15    |
| RP3-483K16.4 | SH3RF1   | 0.463040797 | 1.03E-24    |
| RP3-483K16.4 | CRELD2   | 0.579126052 | 1.12E-40    |
| RP3-483K16.4 | PCP4     | 0.153696821 | 0.001236437 |
| RP3-483K16.4 | GCSH     | 0.660990149 | 1.83E-56    |
| RP3-483K16.4 | IMPA2    | 0.56136795  | 8.13E-38    |
| RP3-483K16.4 | C1R      | 0.202413326 | 1.93E-05    |
| RP3-483K16.4 | SUCNR1   | 0.505891053 | 6.65E-30    |
| RP3-483K16.4 | SFRP1    | 0.560872938 | 9.71E-38    |
| RP3-483K16.4 | UGT8     | 0.391087582 | 1.71E-17    |
| RP3-483K16.4 | TLE4     | 0.433777704 | 1.44E-21    |
| RP3-483K16.4 | ANTXR1   | 0.482858731 | 5.05E-27    |
| RP3-483K16.4 | GPX3     | 0.375989497 | 3.45E-16    |
| RP3-483K16.4 | DPY19L2  | 0.562755119 | 4.93E-38    |
| RP3-483K16.4 | FAM46C   | 0.38391955  | 7.25E-17    |
| RP3-483K16.4 | IL33     | 0.421268165 | 2.59E-20    |
| RP3-483K16.4 | PEG3     | 0.542040418 | 6.83E-35    |
| RP3-483K16.4 | FAHD2A   | 0.597301935 | 8.54E-44    |
| RP3-483K16.4 | PTGDS    | 0.260027144 | 3.24E-08    |
| RP3-483K16.4 | CHCHD10  | 0.405354075 | 8.62E-19    |
| RP3-483K16.4 | CD36     | 0.604698751 | 4.03E-45    |
| RP3-483K16.4 | ANKRD37  | 0.682775011 | 1.52E-61    |
| RP3-483K16.4 | TSPAN33  | 0.536286788 | 4.67E-34    |
| RP3-483K16.4 | PRDM16   | 0.58170437  | 4.15E-41    |
| RP3-483K16.4 | UST      | 0.60463925  | 4.13E-45    |

|              |          |             |             |
|--------------|----------|-------------|-------------|
| RP3-483K16.4 | NEXN     | 0.650593474 | 3.46E-54    |
| RP3-483K16.4 | NUPR1L   | 0.311300661 | 2.55E-11    |
| RP3-483K16.4 | SLC24A3  | 0.512578186 | 8.80E-31    |
| RP3-483K16.4 | MARC1    | 0.62856926  | 1.20E-49    |
| RP3-483K16.4 | MYH11    | 0.504070004 | 1.14E-29    |
| RP3-483K16.4 | APOA1    | 0.609563721 | 5.18E-46    |
| RP3-483K16.4 | TMEM178B | 0.440666813 | 2.79E-22    |
| RP3-483K16.4 | CAPN6    | 0.434945971 | 1.09E-21    |
| RP3-483K16.4 | PPM1L    | 0.588631492 | 2.77E-42    |
| RP3-483K16.4 | FZD8     | 0.62487681  | 6.39E-49    |
| RP3-483K16.4 | RCAN2    | 0.635431917 | 5.06E-51    |
| RP3-483K16.4 | COPZ2    | 0.615928861 | 3.35E-47    |
| RP3-483K16.4 | GAS1     | 0.439156387 | 4.01E-22    |
| RP3-483K16.4 | DACT1    | 0.482165076 | 6.12E-27    |
| RP3-483K16.4 | WBSCR17  | 0.628874211 | 1.05E-49    |
| RP3-483K16.4 | NCS1     | 0.478903456 | 1.50E-26    |
| RP3-483K16.4 | SPIRE2   | 0.545517276 | 2.10E-35    |
| RP3-483K16.4 | C15orf52 | 0.353686431 | 2.21E-14    |
| RP3-483K16.4 | SPAG5    | 0.508167471 | 3.36E-30    |
| RP3-483K16.4 | ARL4D    | 0.436013769 | 8.49E-22    |
| RP3-483K16.4 | FAM189A2 | 0.635757788 | 4.35E-51    |
| RP3-483K16.4 | MAP1LC3A | 0.647992603 | 1.24E-53    |
| RP3-483K16.4 | KLF6     | 0.256611134 | 4.96E-08    |
| RP3-483K16.4 | ADD3     | 0.469302347 | 1.99E-25    |
| RP3-483K16.4 | TSPAN7   | 0.654794553 | 4.26E-55    |
| RP3-483K16.4 | KLF9     | 0.574997097 | 5.36E-40    |
| RP3-483K16.4 | KCNQ1    | 0.581290134 | 4.87E-41    |
| RP3-483K16.4 | MAN1A1   | 0.275680948 | 4.26E-09    |
| RP3-483K16.4 | MLF1     | 0.505181512 | 8.22E-30    |
| RP3-483K16.4 | RARB     | 0.695084646 | 1.29E-64    |
| RP3-483K16.4 | CDC42EP2 | 0.603943113 | 5.53E-45    |
| RP3-483K16.4 | FAM3B    | 0.304811139 | 6.84E-11    |
| RP3-483K16.4 | GADD45B  | 0.350912803 | 3.63E-14    |
| RP3-483K16.4 | TMEM47   | 0.572780605 | 1.23E-39    |
| RP3-483K16.4 | SDF2L1   | 0.50691753  | 4.89E-30    |
| RP3-483K16.4 | CCDC85A  | 0.292985099 | 3.87E-10    |
| RP3-483K16.4 | CRYBG3   | 0.141976592 | 0.002869572 |
| RP3-483K16.4 | FBLN2    | 0.294878556 | 2.95E-10    |
| RP3-483K16.4 | PEBP4    | 0.317087938 | 1.04E-11    |
| RP3-483K16.4 | CDADC1   | 0.662893818 | 6.83E-57    |
| RP3-483K16.4 | FAM63A   | 0.54313831  | 4.72E-35    |
| RP3-483K16.4 | GLUL     | 0.422400437 | 2.00E-20    |
| RP3-483K16.4 | FREM2    | 0.366588307 | 2.07E-15    |
| RP3-483K16.4 | ACKR3    | 0.600263002 | 2.54E-44    |
| RP3-483K16.4 | DENND6A  | 0.632971394 | 1.59E-50    |
| RP3-483K16.4 | CLDN8    | 0.142957893 | 0.002680405 |
| RP3-483K16.4 | UTS2R    | 0.222614105 | 2.47E-06    |
| RP3-483K16.4 | SCNN1B   | 0.517952685 | 1.68E-31    |
| RP3-483K16.4 | TTC30A   | 0.539658119 | 1.52E-34    |
| RP3-483K16.4 | CORO2B   | 0.730063782 | 2.91E-74    |
| RP3-483K16.4 | TC2N     | 0.271316259 | 7.59E-09    |

|              |          |              |             |
|--------------|----------|--------------|-------------|
| RP3-483K16.4 | ALDH2    | 0.602421766  | 1.04E-44    |
| RP3-483K16.4 | GPR183   | 0.21954784   | 3.42E-06    |
| RP3-483K16.4 | C4orf47  | 0.625317357  | 5.24E-49    |
| RP3-483K16.4 | SLC25A42 | 0.653394122  | 8.60E-55    |
| RP3-483K16.4 | LGMN     | 0.506453296  | 5.62E-30    |
| RP3-483K16.4 | ACSF2    | 0.530560532  | 3.05E-33    |
| RP3-483K16.4 | KIAA1467 | 0.556413573  | 4.76E-37    |
| RP3-483K16.4 | PRKG1    | 0.703776649  | 7.01E-67    |
| RP3-483K16.4 | GNAI1    | 0.598740804  | 4.75E-44    |
| RP3-483K16.4 | ABCC4    | 0.372836879  | 6.33E-16    |
| RP3-483K16.4 | PRPS1    | 0.546248731  | 1.64E-35    |
| RP3-483K16.4 | TSPAN5   | 0.329259352  | 1.47E-12    |
| RP3-483K16.4 | CR2      | 0.241800872  | 2.93E-07    |
| RP3-483K16.4 | CCDC170  | 0.457521269  | 4.26E-24    |
| RP3-483K16.4 | RRAD     | 0.153681148  | 0.001237879 |
| RP3-483K16.4 | SCGB2A1  | 0.497492086  | 7.92E-29    |
| RP3-483K16.4 | SESN3    | 0.323815636  | 3.56E-12    |
| RP3-483K16.4 | SGK223   | 0.350067027  | 4.22E-14    |
| RP3-483K16.4 | NDRG2    | 0.705594932  | 2.30E-67    |
| RP3-483K16.4 | C3orf52  | 0.236307408  | 5.49E-07    |
| RP3-483K16.4 | FLRT3    | -0.299578548 | 1.49E-10    |
| RP3-483K16.4 | MST1R    | -0.572712665 | 1.26E-39    |
| RP3-483K16.4 | SDC1     | -0.486207013 | 1.99E-27    |
| RP3-483K16.4 | ST8SIA4  | -0.575977689 | 3.70E-40    |
| RP3-483K16.4 | UBTD1    | -0.307235564 | 4.74E-11    |
| RP3-483K16.4 | EPHA2    | -0.352517621 | 2.73E-14    |
| RP3-483K16.4 | TMEM130  | -0.142036163 | 0.002857751 |
| RP3-483K16.4 | SPINK2   | -0.418504733 | 4.83E-20    |
| RP3-483K16.4 | MMP16    | -0.541313928 | 8.73E-35    |
| RP3-483K16.4 | SIGLEC15 | -0.421327154 | 2.56E-20    |
| RP3-483K16.4 | RIN1     | -0.397028579 | 5.01E-18    |
| RP3-483K16.4 | IL1RN    | -0.528640055 | 5.68E-33    |
| RP3-483K16.4 | FCER1G   | -0.252786704 | 7.93E-08    |
| RP3-483K16.4 | CD276    | -0.492326868 | 3.51E-28    |
| RP3-483K16.4 | CTSB     | -0.450049563 | 2.80E-23    |
| RP3-483K16.4 | FAM171A2 | -0.124950938 | 0.008771673 |
| RP3-483K16.4 | ASPHD1   | -0.493165977 | 2.76E-28    |
| RP3-483K16.4 | C15orf48 | -0.38015767  | 1.53E-16    |
| RP3-483K16.4 | DYSF     | -0.128411271 | 0.007059897 |
| RP3-483K16.4 | PDZRN4   | -0.037757446 | 0.430034727 |
| RP3-483K16.4 | EFHD2    | -0.195693004 | 3.65E-05    |
| RP3-483K16.4 | ASF1B    | -0.470894683 | 1.31E-25    |
| RP3-483K16.4 | AQP1     | -0.031366824 | 0.512148795 |
| RP3-483K16.4 | ARRDC2   | -0.323677132 | 3.64E-12    |
| RP3-483K16.4 | PRSS1    | -0.28393493  | 1.38E-09    |
| RP3-483K16.4 | MAPK13   | -0.588649789 | 2.75E-42    |
| RP3-483K16.4 | CST5     | -0.501556382 | 2.41E-29    |
| RP3-483K16.4 | AHR      | -0.475090231 | 4.23E-26    |
| RP3-483K16.4 | BAX      | -0.44859261  | 4.02E-23    |
| RP3-483K16.4 | C1orf115 | -0.205549066 | 1.42E-05    |
| RP3-483K16.4 | PLK3     | -0.326906271 | 2.16E-12    |

|              |          |              |             |
|--------------|----------|--------------|-------------|
| RP3-483K16.4 | JAG2     | -0.202121354 | 1.98E-05    |
| RP3-483K16.4 | RAD23B   | -0.48106839  | 8.28E-27    |
| RP3-483K16.4 | CA12     | 0.084101509  | 0.078370874 |
| RP3-483K16.4 | ADTRP    | -0.204454791 | 1.58E-05    |
| RP3-483K16.4 | UCP2     | -0.226300573 | 1.67E-06    |
| RP3-483K16.4 | IGFBP2   | -0.272222387 | 6.74E-09    |
| RP3-483K16.4 | LOXL2    | -0.201017576 | 2.20E-05    |
| RP3-483K16.4 | GPX1     | -0.402036996 | 1.75E-18    |
| RP3-483K16.4 | P3H3     | -0.396967944 | 5.07E-18    |
| RP3-483K16.4 | C2orf81  | -0.218235703 | 3.93E-06    |
| RP3-483K16.4 | CDT1     | -0.546071222 | 1.74E-35    |
| RP3-483K16.4 | SNX25    | -0.271595324 | 7.32E-09    |
| RP3-483K16.4 | MTHFD1L  | -0.599615798 | 3.31E-44    |
| RP3-483K16.4 | CDC42BPG | -0.614618519 | 5.91E-47    |
| RP3-483K16.4 | MSN      | -0.562482507 | 5.44E-38    |
| RP3-483K16.4 | SIGLEC6  | -0.355403421 | 1.62E-14    |
| RP3-483K16.4 | F2R      | -0.174584776 | 0.000237109 |
| RP3-483K16.4 | TMEM184A | -0.570297459 | 3.11E-39    |
| RP3-483K16.4 | CKS2     | -0.396223156 | 5.92E-18    |
| RP3-483K16.4 | TAX1BP3  | -0.439990391 | 3.28E-22    |
| RP3-483K16.4 | PMEP1    | -0.277062159 | 3.54E-09    |
| RP3-483K16.4 | CXCL16   | -0.566845636 | 1.11E-38    |
| RP3-483K16.4 | FAXC     | -0.666062038 | 1.31E-57    |
| RP3-483K16.4 | VTCN1    | -0.534998317 | 7.15E-34    |
| RP3-483K16.4 | SH2D4A   | -0.517150169 | 2.15E-31    |
| RP3-483K16.4 | RNF24    | -0.474801592 | 4.58E-26    |
| RP3-483K16.4 | LY6G6C   | -0.46021627  | 2.14E-24    |
| RP3-483K16.4 | NID1     | -0.315383267 | 1.36E-11    |
| RP3-483K16.4 | STAC     | -0.61712916  | 1.98E-47    |
| RP3-483K16.4 | RAB34    | -0.391083327 | 1.71E-17    |
| RP3-483K16.4 | HES4     | -0.253205408 | 7.53E-08    |
| RP3-483K16.4 | EPHA10   | -0.547604767 | 1.03E-35    |
| RP3-483K16.4 | ENTPD2   | -0.325591227 | 2.67E-12    |
| RP3-483K16.4 | DDB2     | -0.527862006 | 7.29E-33    |
| RP3-483K16.4 | NKAIN4   | -0.291863946 | 4.55E-10    |
| RP3-483K16.4 | TRIM29   | -0.435198559 | 1.03E-21    |
| RP3-483K16.4 | ADCY8    | -0.528916271 | 5.19E-33    |
| RP3-483K16.4 | SFTA2    | -0.405773913 | 7.88E-19    |
| RP3-483K16.4 | NRIP1    | -0.453996541 | 1.04E-23    |
| RP3-483K16.4 | VWA1     | 0.006273322  | 0.89572212  |
| RP3-483K16.4 | APLNR    | -0.029259547 | 0.540909238 |
| RP3-483K16.4 | REN      | -0.35267297  | 2.65E-14    |
| RP3-483K16.4 | EDIL3    | -0.160019999 | 0.000765602 |
| RP3-483K16.4 | AGR1     | -0.428402637 | 5.06E-21    |
| RP3-483K16.4 | TREM1    | -0.391390405 | 1.60E-17    |
| RP3-483K16.4 | SRL      | -0.349246853 | 4.87E-14    |
| RP3-483K16.4 | RASGRF1  | -0.401361567 | 2.02E-18    |
| RP3-483K16.4 | RMI2     | -0.420321669 | 3.21E-20    |
| RP3-483K16.4 | SAMD1    | -0.395426527 | 6.99E-18    |
| RP3-483K16.4 | MGAT4B   | -0.632544818 | 1.94E-50    |
| RP3-483K16.4 | NXN      | -0.498453459 | 5.98E-29    |

|              |          |              |             |
|--------------|----------|--------------|-------------|
| RP3-483K16.4 | SH3BGRL3 | -0.382871372 | 8.93E-17    |
| RP3-483K16.4 | CA11     | -0.220311847 | 3.16E-06    |
| RP3-483K16.4 | PLD3     | -0.215273857 | 5.34E-06    |
| RP3-483K16.4 | LURAP1L  | -0.510479064 | 1.67E-30    |
| RP3-483K16.4 | CARNS1   | -0.228320903 | 1.34E-06    |
| RP3-483K16.4 | PDLIM7   | -0.252208079 | 8.50E-08    |
| RP3-483K16.4 | BCL2L1   | -0.611878839 | 1.93E-46    |
| RP3-483K16.4 | GGT6     | -0.253456885 | 7.30E-08    |
| RP3-483K16.4 | DPYSL3   | -0.307799722 | 4.36E-11    |
| RP3-483K16.4 | FYN      | -0.464026566 | 7.97E-25    |
| RP3-483K16.4 | TK1      | -0.409951447 | 3.19E-19    |
| RP3-483K16.4 | AK1      | -0.238394544 | 4.33E-07    |
| RP3-483K16.4 | HIGD1B   | 0.047221753  | 0.32357624  |
| RP3-483K16.4 | TMEM59L  | -0.341249143 | 1.96E-13    |
| RP3-483K16.4 | MEGF9    | -0.48560229  | 2.35E-27    |
| RP3-483K16.4 | ZFP36L1  | -0.444963136 | 9.82E-23    |
| RP3-483K16.4 | ADRA1B   | -0.252133614 | 8.58E-08    |
| RP3-483K16.4 | EPHA4    | -0.522523321 | 4.00E-32    |
| RP3-483K16.4 | TCERG1L  | -0.088744554 | 0.063201625 |
| RP3-483K16.4 | NGFR     | -0.110207942 | 0.020912055 |
| RP3-483K16.4 | EBI3     | -0.457890897 | 3.88E-24    |
| RP3-483K16.4 | S100A10  | -0.413074705 | 1.61E-19    |
| RP3-483K16.4 | S100B    | -0.261903013 | 2.56E-08    |
| RP3-483K16.4 | CD44     | -0.178553809 | 0.000169428 |
| RP3-483K16.4 | BHLHE41  | -0.39300274  | 1.15E-17    |
| RP3-483K16.4 | FBXO2    | -0.310085218 | 3.08E-11    |
| RP3-483K16.4 | SLC30A2  | -0.50837356  | 3.15E-30    |
| RP3-483K16.4 | FRMD5    | -0.62071658  | 4.09E-48    |
| RP3-483K16.4 | SAMD11   | -0.296220266 | 2.43E-10    |
| RP3-483K16.4 | SIPA1L2  | -0.410550143 | 2.80E-19    |
| RP3-483K16.4 | S100A16  | -0.519491974 | 1.04E-31    |
| RP3-483K16.4 | PPL      | -0.645862987 | 3.51E-53    |
| RP3-483K16.4 | ARHGD1B  | -0.121381105 | 0.010915778 |
| RP3-483K16.4 | CDC42EP3 | -0.590609484 | 1.26E-42    |
| RP3-483K16.4 | RUNX2    | -0.349062039 | 5.04E-14    |
| RP3-483K16.4 | LAMC2    | -0.603676388 | 6.18E-45    |
| RP3-483K16.4 | BRINP1   | -0.402162097 | 1.70E-18    |
| RP3-483K16.4 | GPRC5B   | -0.477164743 | 2.41E-26    |
| RP3-483K16.4 | AQP5     | -0.044048285 | 0.357191579 |
| RP3-483K16.4 | PLAG1    | -0.354332075 | 1.97E-14    |
| RP3-483K16.4 | PTPRU    | -0.560268569 | 1.21E-37    |
| RP3-483K16.4 | ANGPTL4  | -0.379788184 | 1.64E-16    |
| RP3-483K16.4 | PALM3    | -0.232373479 | 8.55E-07    |
| RP3-483K16.4 | ACP5     | -0.312283412 | 2.19E-11    |
| RP3-483K16.4 | DLG4     | -0.249122195 | 1.23E-07    |
| RP3-483K16.4 | ETNK2    | -0.296809246 | 2.23E-10    |
| RP3-483K16.4 | CD109    | -0.413991541 | 1.32E-19    |
| RP3-483K16.4 | SNX22    | -0.166164959 | 0.000472378 |
| RP3-483K16.4 | TMEM98   | -0.445350422 | 8.93E-23    |
| RP3-483K16.4 | CTHRC1   | -0.272536698 | 6.47E-09    |
| RP3-483K16.4 | S100A2   | -0.401009882 | 2.17E-18    |

|              |          |              |             |
|--------------|----------|--------------|-------------|
| RP3-483K16.4 | C11orf80 | -0.549535953 | 5.28E-36    |
| RP3-483K16.4 | SREBF1   | -0.484008535 | 3.67E-27    |
| RP3-483K16.4 | PRSS22   | -0.55645045  | 4.70E-37    |
| RP3-483K16.4 | CMTM3    | -0.414661155 | 1.14E-19    |
| RP3-483K16.4 | RDH5     | -0.372089822 | 7.30E-16    |
| RP3-483K16.4 | MYH10    | -0.494424925 | 1.92E-28    |
| RP3-483K16.4 | EVPL     | -0.473686751 | 6.18E-26    |
| RP3-483K16.4 | SCD      | -0.478335894 | 1.75E-26    |
| RP3-483K16.4 | CD151    | -0.36768861  | 1.68E-15    |
| RP3-483K16.4 | S100A4   | -0.331546833 | 1.01E-12    |
| RP3-483K16.4 | BNIP1    | -0.260697609 | 2.98E-08    |
| RP3-483K16.4 | MAP3K6   | -0.499973884 | 3.84E-29    |
| RP3-483K16.4 | MANEAL   | -0.481921683 | 6.55E-27    |
| RP3-483K16.4 | CD207    | -0.250967961 | 9.88E-08    |
| RP3-483K16.4 | CD1A     | -0.292369731 | 4.23E-10    |
| RP3-483K16.4 | C3       | -0.355669672 | 1.55E-14    |
| RP3-483K16.4 | NT5E     | -0.492409913 | 3.43E-28    |
| RP3-483K16.4 | CACNG4   | -0.510458576 | 1.68E-30    |
| RP3-483K16.4 | FHOD1    | -0.399295423 | 3.12E-18    |
| RP3-483K16.4 | LEMD1    | -0.548817689 | 6.77E-36    |
| RP3-483K16.4 | ATP11A   | -0.290341535 | 5.64E-10    |
| RP3-483K16.4 | PPAP2C   | -0.337289826 | 3.85E-13    |
| RP3-483K16.4 | DRAM1    | -0.539475078 | 1.62E-34    |
| RP3-483K16.4 | CDA      | -0.097086857 | 0.042032206 |
| RP3-483K16.4 | CCND2    | -0.220076397 | 3.24E-06    |
| RP3-483K16.4 | LCN6     | -0.06282822  | 0.188865519 |
| RP3-483K16.4 | CDH4     | -0.422325121 | 2.04E-20    |
| RP3-483K16.4 | MMP11    | -0.408551655 | 4.33E-19    |
| RP3-483K16.4 | B3GAT1   | -0.384541932 | 6.40E-17    |
| RP3-483K16.4 | SPP1     | -0.268238744 | 1.14E-08    |
| RP3-483K16.4 | HLA-DQB1 | -0.375477181 | 3.81E-16    |
| RP3-483K16.4 | SDC3     | -0.462451463 | 1.20E-24    |
| RP3-483K16.4 | CX3CL1   | -0.386056684 | 4.73E-17    |
| RP3-483K16.4 | SDK1     | -0.312598575 | 2.09E-11    |
| RP3-483K16.4 | DOCK9    | -0.528919545 | 5.19E-33    |
| RP3-483K16.4 | CSF2     | -0.470013914 | 1.65E-25    |
| RP3-483K16.4 | GRHL3    | -0.591050811 | 1.06E-42    |
| RP3-483K16.4 | TMEM92   | -0.54682935  | 1.34E-35    |
| RP3-483K16.4 | BASP1    | -0.45579284  | 6.62E-24    |
| RP3-483K16.4 | HRH1     | -0.542379906 | 6.10E-35    |
| RP3-483K16.4 | ESM1     | -0.090733325 | 0.057489066 |
| RP3-483K16.4 | B4GALNT3 | -0.536741873 | 4.02E-34    |
| RP3-483K16.4 | LMO3     | -0.284062965 | 1.36E-09    |
| RP3-483K16.4 | C9orf16  | -0.460426452 | 2.03E-24    |
| RP3-483K16.4 | SEMA3F   | -0.226451346 | 1.64E-06    |
| RP3-483K16.4 | PLA2G12B | -0.188813716 | 6.87E-05    |
| RP3-483K16.4 | KLK6     | -0.35947654  | 7.74E-15    |
| RP3-483K16.4 | ST3GAL5  | -0.324661412 | 3.11E-12    |
| RP3-483K16.4 | FAM132B  | -0.173331714 | 0.000263258 |
| RP3-483K16.4 | CDKN1A   | -0.314982647 | 1.44E-11    |
| RP3-483K16.4 | E2F1     | -0.548426218 | 7.75E-36    |

|              |          |              |             |
|--------------|----------|--------------|-------------|
| RP3-483K16.4 | B3GNT8   | -0.352472517 | 2.75E-14    |
| RP3-483K16.4 | MTMR11   | -0.535732062 | 5.61E-34    |
| RP3-483K16.4 | MYO1G    | -0.431576601 | 2.42E-21    |
| RP3-483K16.4 | TMSB10   | -0.387814048 | 3.32E-17    |
| RP3-483K16.4 | UNC5CL   | -0.589654635 | 1.85E-42    |
| RP3-483K16.4 | ABR      | -0.595996181 | 1.45E-43    |
| RP3-483K16.4 | PLP2     | -0.471831589 | 1.02E-25    |
| RP3-483K16.4 | SRCIN1   | -0.506369967 | 5.76E-30    |
| RP3-483K16.4 | PDE9A    | -0.535274424 | 6.52E-34    |
| RP3-483K16.4 | TREM2    | -0.271644825 | 7.27E-09    |
| RP3-483K16.4 | KDELR3   | -0.364522731 | 3.05E-15    |
| RP3-483K16.4 | PC       | -0.41302882  | 1.63E-19    |
| RP3-483K16.4 | C2CD4A   | -0.595419967 | 1.83E-43    |
| RP3-483K16.4 | PELI1    | -0.427863655 | 5.74E-21    |
| RP3-483K16.4 | SSX1     | -0.273767846 | 5.49E-09    |
| RP3-483K16.4 | MROH6    | -0.466550703 | 4.12E-25    |
| RP3-483K16.4 | ESPN     | -0.353248509 | 2.39E-14    |
| RP3-483K16.4 | BMP1     | -0.308718473 | 3.79E-11    |
| RP3-483K16.4 | TM4SF4   | -0.426921307 | 7.13E-21    |
| RP3-483K16.4 | CORO2A   | -0.527977746 | 7.03E-33    |
| RP3-483K16.4 | CD164L2  | -0.426592241 | 7.69E-21    |
| RP3-483K16.4 | CTSS     | -0.457159442 | 4.68E-24    |
| RP3-483K16.4 | CLU      | -0.355655771 | 1.55E-14    |
| RP3-483K16.4 | TMSB4X   | -0.390783128 | 1.82E-17    |
| RP3-483K16.4 | WNT10A   | -0.407960846 | 4.92E-19    |
| RP3-483K16.4 | NAPSA    | -0.377541906 | 2.55E-16    |
| RP3-483K16.4 | PLEKHA4  | -0.345063503 | 1.01E-13    |
| RP3-483K16.4 | SFTPA1   | -0.03087197  | 0.518830518 |
| RP3-483K16.4 | C1orf116 | -0.45821769  | 3.57E-24    |
| RP3-483K16.4 | TM4SF1   | -0.37304304  | 6.08E-16    |
| RP3-483K16.4 | SEL1L3   | -0.510521757 | 1.65E-30    |
| RP3-483K16.4 | VASN     | -0.525892879 | 1.37E-32    |
| RP3-483K16.4 | NPTXR    | -0.589078066 | 2.32E-42    |
| RP3-483K16.4 | PDE4C    | -0.550280031 | 4.08E-36    |
| RP3-483K16.4 | CDC42EP1 | -0.47104574  | 1.25E-25    |
| RP3-483K16.4 | ENDOD1   | -0.604648824 | 4.12E-45    |
| RP3-483K16.4 | RYR1     | -0.446590577 | 6.59E-23    |
| RP3-483K16.4 | IL1RAP   | -0.526512992 | 1.12E-32    |
| RP3-483K16.4 | SLC35F2  | -0.606044879 | 2.29E-45    |
| RP3-483K16.4 | ISYNA1   | -0.254396558 | 6.51E-08    |
| RP3-483K16.4 | HLA-G    | -0.51335205  | 6.94E-31    |
| RP3-483K16.4 | CDKN2B   | -0.497817532 | 7.20E-29    |
| RP3-483K16.4 | ALDH1A3  | -0.512099839 | 1.02E-30    |
| RP3-483K16.4 | CLIP3    | -0.37112157  | 8.79E-16    |
| RP3-483K16.4 | ULBP2    | -0.409839609 | 3.27E-19    |
| RP3-483K16.4 | ETHE1    | -0.615921557 | 3.36E-47    |
| RP3-483K16.4 | XPR1     | -0.527518193 | 8.14E-33    |
| RP3-483K16.4 | SPTBN2   | -0.634825633 | 6.72E-51    |
| RP3-483K16.4 | IVL      | -0.484259837 | 3.42E-27    |
| RP3-483K16.4 | MARCO    | -0.401878351 | 1.81E-18    |
| RP3-483K16.4 | PLXND1   | -0.176597518 | 0.000200134 |



|              |          |              |             |
|--------------|----------|--------------|-------------|
| RP3-483K16.4 | EMILIN2  | -0.473274217 | 6.91E-26    |
| RP3-483K16.4 | PLAUR    | -0.443756455 | 1.32E-22    |
| RP3-483K16.4 | CDC42EP5 | -0.413843889 | 1.36E-19    |
| RP3-483K16.4 | TRPC5    | -0.217006161 | 4.46E-06    |
| RP3-483K16.4 | TMEM100  | -0.300666157 | 1.27E-10    |
| RP3-483K16.4 | QSOX1    | -0.490183493 | 6.47E-28    |
| RP3-483K16.4 | ARHGAP23 | -0.421910105 | 2.24E-20    |
| RP3-483K16.4 | MDFI     | -0.259135129 | 3.62E-08    |
| RP3-483K16.4 | FSTL3    | -0.46991168  | 1.70E-25    |
| RP3-483K16.4 | INF2     | -0.368001858 | 1.59E-15    |
| RP3-483K16.4 | TGFBR1   | -0.453654713 | 1.14E-23    |
| RP3-483K16.4 | TGFBI    | -0.269781367 | 9.29E-09    |
| RP3-483K16.4 | ERBB3    | -0.604222461 | 4.92E-45    |
| RP3-483K16.4 | CCL18    | -0.296420257 | 2.36E-10    |
| RP3-483K16.4 | CCL17    | -0.293125635 | 3.80E-10    |
| RP3-483K16.4 | C16orf45 | -0.351484833 | 3.28E-14    |
| RP3-483K16.4 | PRDM1    | -0.208521408 | 1.06E-05    |
| RP3-483K16.4 | TRIM47   | -0.556076851 | 5.37E-37    |
| RP3-483K16.4 | CNFN     | -0.421227939 | 2.61E-20    |
| RP3-483K16.4 | ARMCX3   | -0.293988314 | 3.35E-10    |
| RP3-483K16.4 | RAMP1    | -0.184788197 | 9.85E-05    |
| RP3-483K16.4 | GABRD    | -0.007836866 | 0.869939816 |
| RP3-483K16.4 | COL13A1  | -0.130041053 | 0.00636252  |
| RP3-483K16.4 | S100A5   | -0.391057867 | 1.72E-17    |
| RP3-483K16.4 | MISP     | -0.47963484  | 1.23E-26    |
| RP3-483K16.4 | HES6     | -0.273077808 | 6.02E-09    |
| RP3-483K16.4 | PSD3     | -0.532037342 | 1.89E-33    |
| RP3-483K16.4 | DOK7     | -0.508015776 | 3.51E-30    |
| RP3-483K16.4 | ZMAT3    | -0.612191023 | 1.68E-46    |
| RP3-483K16.4 | MFAP2    | -0.255491825 | 5.69E-08    |
| RP3-483K16.4 | TMEM79   | -0.462749889 | 1.11E-24    |
| RP3-483K16.4 | SLC1A5   | -0.3511874   | 3.46E-14    |
| RP3-483K16.4 | BBC3     | -0.519798768 | 9.42E-32    |
| RP3-483K16.4 | HLA-DQB2 | -0.331633992 | 9.93E-13    |
| RP3-483K16.4 | C1QL1    | -0.30470469  | 6.95E-11    |
| RP3-483K16.4 | TMEM215  | -0.183225033 | 0.000113027 |
| RP3-483K16.4 | PNP      | -0.358261465 | 9.67E-15    |
| RP3-483K16.4 | ARNTL    | -0.394607487 | 8.28E-18    |
| RP3-483K16.4 | CLDN2    | -0.23011026  | 1.10E-06    |
| RP3-483K16.4 | MVP      | -0.58456147  | 1.37E-41    |
| RP3-483K16.4 | LGALS1   | -0.355108421 | 1.71E-14    |
| RP3-483K16.4 | BIRC7    | -0.450438872 | 2.54E-23    |
| RP3-483K16.4 | COL8A1   | -0.560202686 | 1.24E-37    |
| RP3-483K16.4 | PERP     | -0.669328551 | 2.33E-58    |
| RP3-483K16.4 | GJA4     | -0.167145693 | 0.000436655 |
| RP3-483K16.4 | IGFL2    | -0.387533147 | 3.51E-17    |
| RP3-483K16.4 | DAPK2    | -0.387051601 | 3.87E-17    |
| RP3-483K16.4 | MAMLD1   | -0.506624706 | 5.34E-30    |
| RP3-483K16.4 | ETV5     | -0.308138572 | 4.14E-11    |
| RP3-483K16.4 | RUNX1    | -0.616218919 | 2.95E-47    |
| RP3-483K16.4 | LONRF2   | -0.230374424 | 1.07E-06    |

|              |           |              |             |
|--------------|-----------|--------------|-------------|
| RP3-483K16.4 | SPOCK1    | -0.080123398 | 0.093604722 |
| RP3-483K16.4 | XKRX      | -0.361459045 | 5.38E-15    |
| RP3-483K16.4 | TGFB1     | -0.205800614 | 1.38E-05    |
| RP3-483K16.4 | ERP27     | -0.262358169 | 2.41E-08    |
| RP3-483K16.4 | TNFRSF10C | -0.516199859 | 2.89E-31    |
| RP3-483K16.4 | PALM      | -0.444090127 | 1.22E-22    |
| RP3-483K16.4 | TSC22D1   | -0.228593869 | 1.30E-06    |
| RP3-483K16.4 | TGM2      | -0.543634528 | 3.99E-35    |
| RP3-483K16.4 | UBE2QL1   | -0.152531415 | 0.001348033 |
| RP3-483K16.4 | ECE1      | -0.458734758 | 3.13E-24    |
| RP3-483K16.4 | COL8A2    | -0.482058839 | 6.30E-27    |
| RP3-483K16.4 | HIST3H2A  | -0.463187457 | 9.92E-25    |
| RP3-483K16.4 | TNFRSF21  | -0.488482935 | 1.05E-27    |
| RP3-483K16.4 | SOX4      | -0.557570185 | 3.16E-37    |
| RP3-483K16.4 | ELF3      | -0.595584924 | 1.72E-43    |
| RP3-483K16.4 | TPD52L1   | -0.49729011  | 8.40E-29    |
| RP3-483K16.4 | INHBB     | -0.310800432 | 2.76E-11    |
| RP3-483K16.4 | HPN       | -0.473368042 | 6.73E-26    |
| RP3-483K16.4 | MMP7      | -0.410344868 | 2.93E-19    |
| RP3-483K16.4 | RAB27A    | -0.545357922 | 2.22E-35    |
| RP3-483K16.4 | IGF2BP2   | -0.472877852 | 7.68E-26    |
| RP3-483K16.4 | ITGB4     | -0.485930431 | 2.15E-27    |
| RP3-483K16.4 | PPP1R1B   | -0.443526607 | 1.39E-22    |
| RP3-483K16.4 | NPDC1     | -0.264303752 | 1.88E-08    |
| RP3-483K16.4 | CCL13     | -0.44163359  | 2.21E-22    |
| RP3-483K16.4 | SPINT1    | -0.643716421 | 9.93E-53    |
| RP3-483K16.4 | HEY2      | -0.244610634 | 2.11E-07    |
| RP3-483K16.4 | CST2      | -0.49889469  | 5.26E-29    |
| RP3-483K16.4 | ADM       | -0.408568959 | 4.31E-19    |
| RP3-483K16.4 | VSTM2L    | -0.486348567 | 1.91E-27    |
| RP3-483K16.4 | FAM84A    | -0.524255013 | 2.31E-32    |
| RP3-483K16.4 | P4HA2     | -0.448998691 | 3.64E-23    |
| RP3-483K16.4 | LPL       | -0.297966993 | 1.88E-10    |
| RP3-483K16.4 | TMEM173   | -0.397625714 | 4.42E-18    |
| RP3-483K16.4 | DHRS3     | -0.408350459 | 4.52E-19    |
| RP3-483K16.4 | SCN1B     | -0.533231683 | 1.28E-33    |
| RP3-483K16.4 | GLT1D1    | -0.324808781 | 3.03E-12    |
| RP3-483K16.4 | PHYHIP    | -0.438821297 | 4.35E-22    |
| RP3-483K16.4 | BHLHE40   | -0.500243091 | 3.54E-29    |
| RP3-483K16.4 | BID       | -0.492433387 | 3.41E-28    |
| RP3-483K16.4 | POSTN     | -0.304644764 | 7.01E-11    |
| RP3-483K16.4 | ITGA3     | -0.681083176 | 3.91E-61    |
| RP3-483K16.4 | RSPO4     | -0.423144941 | 1.69E-20    |
| RP3-483K16.4 | ADAMTS9   | -0.115672508 | 0.015315016 |
| RP3-483K16.4 | ABTB2     | -0.601264019 | 1.68E-44    |
| RP3-483K16.4 | KCNQ3     | -0.657067992 | 1.35E-55    |
| RP3-483K16.4 | ANXA1     | -0.408272519 | 4.60E-19    |
| RP3-483K16.4 | S100A11   | -0.523175631 | 3.25E-32    |
| RP3-483K16.4 | CEACAM6   | -0.548933636 | 6.51E-36    |
| RP3-483K16.4 | IER5L     | -0.472601128 | 8.27E-26    |
| RP3-483K16.4 | KRT80     | -0.594151232 | 3.06E-43    |

|              |            |              |             |
|--------------|------------|--------------|-------------|
| RP3-483K16.4 | CDH6       | -0.491463291 | 4.49E-28    |
| RP3-483K16.4 | UNC5B      | -0.457243693 | 4.58E-24    |
| RP3-483K16.4 | PLEKHN1    | -0.558351212 | 2.39E-37    |
| RP3-483K16.4 | SYTL1      | -0.41800965  | 5.39E-20    |
| RP3-483K16.4 | TMEM163    | -0.412827482 | 1.70E-19    |
| RP3-483K16.4 | C4orf48    | -0.21502167  | 5.48E-06    |
| RP3-483K16.4 | B3GNT7     | -0.294898555 | 2.94E-10    |
| RP3-483K16.4 | BAIAP3     | -0.385271827 | 5.53E-17    |
| RP3-483K16.4 | PHLDA2     | -0.463237596 | 9.79E-25    |
| RP3-483K16.4 | GAP43      | -0.43965698  | 3.56E-22    |
| RP3-483K16.4 | S100A1     | -0.484210511 | 3.47E-27    |
| RP3-483K16.4 | PTPRE      | -0.604153954 | 5.06E-45    |
| RP3-483K16.4 | CCND1      | -0.558821261 | 2.02E-37    |
| RP3-483K16.4 | ST6GALNAC5 | -0.622776074 | 1.64E-48    |
| RP3-483K16.4 | KRT17      | -0.198494858 | 2.80E-05    |
| RP3-483K16.4 | HPCAL4     | -0.250643259 | 1.03E-07    |
| RP3-483K16.4 | GABBR2     | -0.214031717 | 6.06E-06    |
| RP3-483K16.4 | DIRAS3     | -0.325975109 | 2.51E-12    |
| RP3-483K16.4 | SERINC2    | -0.534846217 | 7.51E-34    |
| RP3-483K16.4 | PTCHD4     | -0.463554815 | 9.01E-25    |
| RP3-483K16.4 | EPS8       | -0.436206739 | 8.11E-22    |
| RP3-483K16.4 | LY6E       | -0.472264122 | 9.05E-26    |
| RP3-483K16.4 | UPP1       | -0.599272197 | 3.82E-44    |
| RP3-483K16.4 | AHNAK2     | -0.636698169 | 2.80E-51    |
| RP3-483K16.4 | PLXNC1     | -0.363156696 | 3.93E-15    |
| RP3-483K16.4 | TNC        | -0.488473786 | 1.05E-27    |
| RP3-483K16.4 | DUSP4      | -0.419902966 | 3.53E-20    |
| RP3-483K16.4 | NRCAM      | -0.502911548 | 1.61E-29    |
| RP3-483K16.4 | NRP2       | -0.333627728 | 7.13E-13    |
| RP3-483K16.4 | CTSC       | -0.513966064 | 5.75E-31    |
| RP3-483K16.4 | AMIGO2     | -0.323846415 | 3.54E-12    |
| RP3-483K16.4 | NAB2       | -0.354233994 | 2.00E-14    |
| RP3-483K16.4 | TBC1D2     | -0.665669645 | 1.61E-57    |
| RP3-483K16.4 | PHLDA3     | -0.521813638 | 5.00E-32    |
| RP3-483K16.4 | PTP4A3     | -0.436755933 | 7.12E-22    |
| RP3-483K16.4 | CRABP2     | -0.244542198 | 2.12E-07    |
| RP3-483K16.4 | GOS2       | -0.303914089 | 7.82E-11    |
| RP3-483K16.4 | S100A6     | -0.565915041 | 1.56E-38    |
| RP3-483K16.4 | FOXQ1      | -0.474445226 | 5.04E-26    |
| RP3-483K16.4 | LRG1       | -0.460739628 | 1.87E-24    |
| RP3-483K16.4 | LAMP5      | -0.264003553 | 1.96E-08    |
| RP3-483K16.4 | ALDH3B1    | -0.624495622 | 7.58E-49    |
| RP3-483K16.4 | CDH2       | -0.005627963 | 0.906397568 |
| RP3-483K16.4 | SCG5       | -0.177142528 | 0.000191093 |
| RP3-483K16.4 | ZCCHC16    | -0.1811049   | 0.000135992 |
| RP3-483K16.4 | GRB7       | -0.576501565 | 3.03E-40    |
| RP3-483K16.4 | TIAM1      | -0.38625788  | 4.54E-17    |
| RP3-483K16.4 | FXYD5      | -0.269263093 | 9.94E-09    |
| RP3-483K16.4 | CLDN9      | -0.389037111 | 2.59E-17    |
| RP3-483K16.4 | FAM43A     | -0.430081069 | 3.43E-21    |
| RP3-483K16.4 | CHST2      | -0.411555769 | 2.25E-19    |

|              |         |              |             |
|--------------|---------|--------------|-------------|
| RP3-483K16.4 | HMGA2   | -0.372776527 | 6.40E-16    |
| RP3-483K16.4 | GALNT7  | -0.529634122 | 4.12E-33    |
| RP3-483K16.4 | CBLN1   | -0.403089713 | 1.40E-18    |
| RP3-483K16.4 | STRA6   | -0.449155705 | 3.50E-23    |
| RP3-483K16.4 | MUC21   | -0.527287452 | 8.77E-33    |
| RP3-483K16.4 | PRR36   | -0.445889475 | 7.83E-23    |
| RP3-483K16.4 | NFE2L3  | -0.531863946 | 2.00E-33    |
| RP3-483K16.4 | NR1D1   | -0.471789109 | 1.03E-25    |
| RP3-483K16.4 | MUC1    | -0.627595406 | 1.87E-49    |
| RP3-483K16.4 | NAT8L   | -0.196615726 | 3.35E-05    |
| RP3-483K16.4 | APOC1   | -0.129883968 | 0.006426937 |
| RP3-483K16.4 | EVA1A   | -0.555201289 | 7.31E-37    |
| RP3-483K16.4 | ENTPD1  | -0.311437282 | 2.50E-11    |
| RP3-483K16.4 | COL1A1  | -0.322663846 | 4.29E-12    |
| RP3-483K16.4 | FNDC4   | -0.406541466 | 6.68E-19    |
| RP3-483K16.4 | FRMD3   | -0.133176012 | 0.005192363 |
| RP3-483K16.4 | SHROOM4 | -0.467828515 | 2.94E-25    |
| RP3-483K16.4 | NELL2   | -0.287649534 | 8.25E-10    |
| RP3-483K16.4 | EPHB3   | -0.590159079 | 1.51E-42    |
| RP3-483K16.4 | TMC6    | -0.567279091 | 9.47E-39    |
| RP3-483K16.4 | NOD1    | -0.399699376 | 2.86E-18    |
| RP3-483K16.4 | GGCT    | -0.496785807 | 9.72E-29    |
| RP3-483K16.4 | ICAM1   | -0.570303204 | 3.10E-39    |
| RP3-483K16.4 | PRSS23  | -0.454532048 | 9.11E-24    |
| RP3-483K16.4 | CFI     | -0.484725168 | 3.01E-27    |
| RP3-483K16.4 | CD55    | -0.602472969 | 1.02E-44    |
| RP3-483K16.4 | RASD2   | -0.426645627 | 7.60E-21    |
| RP3-483K16.4 | KLK11   | -0.28339349  | 1.49E-09    |
| RP3-483K16.4 | ICAM5   | -0.415080001 | 1.03E-19    |
| RP3-483K16.4 | ADORA1  | -0.518159555 | 1.57E-31    |
| RP3-483K16.4 | ITGA2   | -0.581365166 | 4.73E-41    |
| RP3-483K16.4 | ABCC3   | -0.416721768 | 7.19E-20    |
| RP3-483K16.4 | MFGE8   | -0.477246441 | 2.36E-26    |
| RP3-483K16.4 | STK32A  | -0.413737227 | 1.39E-19    |
| RP3-483K16.4 | CYSLTR2 | -0.299468695 | 1.51E-10    |
| RP3-483K16.4 | LAD1    | -0.556940357 | 3.95E-37    |
| RP3-483K16.4 | MGAT3   | -0.548401325 | 7.82E-36    |
| RP3-483K16.4 | IGFBP6  | -0.30631426  | 5.45E-11    |
| RP3-483K16.4 | CYP2S1  | -0.603826451 | 5.80E-45    |
| RP3-483K16.4 | KCNJ2   | -0.414266493 | 1.24E-19    |
| RP3-483K16.4 | FAM20A  | -0.482346202 | 5.82E-27    |
| RP3-483K16.4 | TGFA    | -0.434173217 | 1.31E-21    |
| RP3-483K16.4 | MXRA8   | -0.385421678 | 5.37E-17    |
| RP3-483K16.4 | C8orf4  | -0.353066531 | 2.47E-14    |
| RP3-483K16.4 | CLDN10  | -0.444921831 | 9.92E-23    |
| RP3-483K16.4 | PDE5A   | -0.492432111 | 3.41E-28    |
| RP3-483K16.4 | APOE    | -0.118275365 | 0.013146037 |
| RP3-483K16.4 | SPOCK2  | -0.510086459 | 1.88E-30    |
| RP3-483K16.4 | TENM1   | -0.171468185 | 0.000307167 |
| RP3-483K16.4 | SLIT1   | -0.189972634 | 6.19E-05    |
| RP3-483K16.4 | CXCL14  | -0.161441918 | 0.000685691 |

|              |           |              |             |
|--------------|-----------|--------------|-------------|
| RP3-483K16.4 | ECM1      | -0.124824206 | 0.008840846 |
| RP3-483K16.4 | DUSP5     | -0.505789143 | 6.85E-30    |
| RP3-483K16.4 | SEZ6L2    | -0.454085047 | 1.02E-23    |
| RP3-483K16.4 | THRSP     | -0.266787678 | 1.37E-08    |
| RP3-483K16.4 | C19orf33  | -0.525965145 | 1.34E-32    |
| RP3-483K16.4 | MPZL2     | -0.563062197 | 4.41E-38    |
| RP3-483K16.4 | CTSH      | -0.471043612 | 1.25E-25    |
| RP3-483K16.4 | CYP1B1    | -0.475247316 | 4.06E-26    |
| RP3-483K16.4 | ALOX5     | -0.588781272 | 2.61E-42    |
| RP3-483K16.4 | SYTL5     | -0.526897248 | 9.94E-33    |
| RP3-483K16.4 | TNFRSF12A | -0.388817476 | 2.71E-17    |
| RP3-483K16.4 | DUSP6     | -0.391384589 | 1.61E-17    |
| RP3-483K16.4 | ALOX15B   | -0.496048537 | 1.20E-28    |
| RP3-483K16.4 | SDC4      | -0.4489716   | 3.66E-23    |
| RP3-483K16.4 | MDK       | -0.386895155 | 3.99E-17    |
| RP3-483K16.4 | KRT19     | -0.575520122 | 4.40E-40    |
| RP3-483K16.4 | MET       | -0.674431645 | 1.51E-59    |
| RP3-483K16.4 | TESC      | -0.129702629 | 0.006502027 |
| RP3-483K16.4 | CXCL17    | -0.604701467 | 4.03E-45    |
| RP3-483K16.4 | NPC2      | -0.33367574  | 7.07E-13    |
| RP3-483K16.4 | COMP      | -0.299801587 | 1.44E-10    |
| RP3-483K16.4 | TUSC3     | -0.406887336 | 6.20E-19    |
| RP3-483K16.4 | TMPRSS4   | -0.627514416 | 1.94E-49    |
| RP3-483K16.4 | LGALS3    | -0.592827465 | 5.21E-43    |
| RP3-483K16.4 | CRLF1     | -0.417475349 | 6.08E-20    |
| RP3-483K16.4 | CTXN1     | -0.416618935 | 7.35E-20    |
| RP3-483K16.4 | PCSK1N    | -0.262115628 | 2.49E-08    |
| RP3-483K16.4 | NMU       | -0.459543863 | 2.54E-24    |
| RP3-483K16.4 | GALE      | -0.485231102 | 2.61E-27    |
| RP3-483K16.4 | PCSK2     | -0.245084513 | 1.99E-07    |
| RP3-483K16.4 | GJB3      | -0.436590408 | 7.41E-22    |
| RP3-483K16.4 | SLPI      | -0.530544505 | 3.07E-33    |
| RP3-483K16.4 | AGR2      | -0.301122022 | 1.18E-10    |
| RP3-483K16.4 | MRC2      | -0.425360014 | 1.02E-20    |
| RP3-483K16.4 | GOLT1A    | -0.370063463 | 1.07E-15    |
| RP3-483K16.4 | SLC27A6   | -0.503031985 | 1.56E-29    |
| RP3-483K16.4 | KCNN4     | -0.552575313 | 1.84E-36    |
| RP3-483K16.4 | ETV4      | -0.390697118 | 1.85E-17    |
| RP3-483K16.4 | SYT12     | -0.486528133 | 1.82E-27    |
| RP3-483K16.4 | PVRL4     | -0.595451384 | 1.81E-43    |
| RP3-483K16.4 | PLCD3     | -0.539270194 | 1.73E-34    |
| RP3-483K16.4 | PLAU      | -0.487457451 | 1.40E-27    |
| RP3-483K16.4 | LRRK2     | -0.229421206 | 1.18E-06    |
| RP3-483K16.4 | SFN       | -0.530934628 | 2.70E-33    |
| RP3-483K16.4 | LPAR5     | -0.499121158 | 4.92E-29    |
| RP3-483K16.4 | NGEF      | -0.584260633 | 1.54E-41    |
| RP3-483K16.4 | DTX4      | -0.518779455 | 1.30E-31    |
| RP3-483K16.4 | CST6      | -0.384267193 | 6.76E-17    |
| RP3-483K16.4 | QPCT      | -0.383214477 | 8.34E-17    |
| RP3-483K16.4 | TIMP1     | -0.395848209 | 6.40E-18    |
| RP3-483K16.4 | CAMK2N1   | -0.445918268 | 7.77E-23    |

|              |          |              |          |
|--------------|----------|--------------|----------|
| RP3-483K16.4 | KLHDC8A  | -0.211142987 | 8.13E-06 |
| RP3-483K16.4 | PDLIM4   | -0.535128899 | 6.84E-34 |
| RP3-483K16.4 | SCEL     | -0.524682723 | 2.02E-32 |
| RP3-483K16.4 | LCN2     | -0.645672074 | 3.86E-53 |
| RP3-483K16.4 | PROS1    | -0.660648179 | 2.18E-56 |
| RP3-483K16.4 | GABRB2   | -0.581344316 | 4.77E-41 |
| RP3-483K16.4 | TMPRSS6  | -0.545708047 | 1.97E-35 |
| RP3-483K16.4 | KLK7     | -0.412268895 | 1.92E-19 |
| RP3-483K16.4 | PDZK1IP1 | -0.527493868 | 8.21E-33 |
| RP3-483K16.4 | CDH3     | -0.463979405 | 8.07E-25 |
| RP3-483K16.4 | LRP4     | -0.295006281 | 2.90E-10 |
| RP3-483K16.4 | IGSF1    | -0.315254053 | 1.38E-11 |
| RP3-483K16.4 | B3GNT3   | -0.699269556 | 1.07E-65 |
| RP3-483K16.4 | CLDN1    | -0.6086497   | 7.64E-46 |
| RP3-483K16.4 | GDF15    | -0.644418516 | 7.08E-53 |
| RP3-483K16.4 | ARHGAP36 | -0.286215146 | 1.01E-09 |
| RP3-483K16.4 | LAMB3    | -0.552618857 | 1.81E-36 |
| RP3-483K16.4 | KLK10    | -0.431797229 | 2.30E-21 |
| RP3-483K16.4 | DPP4     | -0.608807139 | 7.14E-46 |
| RP3-483K16.4 | METTL7B  | -0.377271423 | 2.69E-16 |
| RP3-483K16.4 | LIPH     | -0.619477631 | 7.07E-48 |
| RP3-483K16.4 | CLDN16   | -0.582863181 | 2.65E-41 |
| RP3-483K16.4 | CHI3L1   | -0.534902527 | 7.37E-34 |
| RP3-483K16.4 | SLC22A31 | -0.432793932 | 1.82E-21 |
| RP3-483K16.4 | TACSTD2  | -0.485146992 | 2.67E-27 |
| RP3-483K16.4 | SFTPB    | -0.495032414 | 1.61E-28 |
| RP3-483K16.4 | RXRG     | -0.26395313  | 1.97E-08 |
| RP3-483K16.4 | DCSTAMP  | -0.553366814 | 1.39E-36 |
| RP3-483K16.4 | CITED1   | -0.329080283 | 1.51E-12 |
| RP3-483K16.4 | SERPINA1 | -0.599769904 | 3.11E-44 |
| RP3-483K16.4 | PRR15    | -0.277827655 | 3.19E-09 |
| RP3-483K16.4 | SLC34A2  | -0.681532233 | 3.04E-61 |
| RP3-483K16.4 | FN1      | -0.677113575 | 3.50E-60 |
| RP3-483K16.4 | ZCCHC12  | -0.234433311 | 6.79E-07 |
| AC096669.3   | TFF3     | 0.576136312  | 3.48E-40 |
| AC096669.3   | CCL21    | 0.335885708  | 4.88E-13 |
| AC096669.3   | TPO      | 0.64276708   | 1.57E-52 |
| AC096669.3   | MT1G     | 0.612336218  | 1.58E-46 |
| AC096669.3   | DIO1     | 0.527570033  | 8.01E-33 |
| AC096669.3   | DPT      | 0.252456464  | 8.25E-08 |
| AC096669.3   | CDH16    | 0.565154431  | 2.06E-38 |
| AC096669.3   | CRABP1   | 0.530176118  | 3.45E-33 |
| AC096669.3   | SLC26A7  | 0.663099951  | 6.14E-57 |
| AC096669.3   | MT1H     | 0.569684606  | 3.90E-39 |
| AC096669.3   | SLC26A4  | 0.631876695  | 2.64E-50 |
| AC096669.3   | SLC5A8   | 0.622445355  | 1.90E-48 |
| AC096669.3   | PKHD1L1  | 0.544873033  | 2.62E-35 |
| AC096669.3   | TFCP2L1  | 0.600542793  | 2.26E-44 |
| AC096669.3   | WSCD2    | 0.600284711  | 2.52E-44 |
| AC096669.3   | IPCEF1   | 0.510216797  | 1.81E-30 |
| AC096669.3   | SLC5A5   | 0.466974285  | 3.69E-25 |

|            |           |             |             |
|------------|-----------|-------------|-------------|
| AC096669.3 | MT1F      | 0.589385581 | 2.06E-42    |
| AC096669.3 | FOSB      | 0.272787188 | 6.26E-09    |
| AC096669.3 | SEMA3D    | 0.519908325 | 9.11E-32    |
| AC096669.3 | BMP8A     | 0.523023199 | 3.41E-32    |
| AC096669.3 | MATN2     | 0.626004239 | 3.84E-49    |
| AC096669.3 | PLA2R1    | 0.502708769 | 1.71E-29    |
| AC096669.3 | COL23A1   | 0.623681386 | 1.09E-48    |
| AC096669.3 | HGD       | 0.671402076 | 7.72E-59    |
| AC096669.3 | TCEAL2    | 0.475870208 | 3.43E-26    |
| AC096669.3 | CHRDL1    | 0.21433982  | 5.87E-06    |
| AC096669.3 | TNFRSF11B | 0.48266301  | 5.33E-27    |
| AC096669.3 | FAM167A   | 0.607064938 | 1.49E-45    |
| AC096669.3 | KIT       | 0.51638601  | 2.73E-31    |
| AC096669.3 | SLC4A4    | 0.660624038 | 2.20E-56    |
| AC096669.3 | SMOC2     | 0.390973943 | 1.75E-17    |
| AC096669.3 | FHL1      | 0.577130989 | 2.39E-40    |
| AC096669.3 | OTOS      | 0.581001465 | 5.44E-41    |
| AC096669.3 | IGFBPL1   | 0.614147492 | 7.25E-47    |
| AC096669.3 | HBB       | 0.306771483 | 5.09E-11    |
| AC096669.3 | BEX1      | 0.449004694 | 3.63E-23    |
| AC096669.3 | FABP4     | 0.512047207 | 1.04E-30    |
| AC096669.3 | LMOD1     | 0.51724309  | 2.09E-31    |
| AC096669.3 | SOD3      | 0.546488198 | 1.51E-35    |
| AC096669.3 | TMEM171   | 0.509024659 | 2.59E-30    |
| AC096669.3 | PI16      | 0.283069022 | 1.56E-09    |
| AC096669.3 | ZMAT4     | 0.600602049 | 2.21E-44    |
| AC096669.3 | MFAP4     | 0.140427982 | 0.003192915 |
| AC096669.3 | CWH43     | 0.585782733 | 8.50E-42    |
| AC096669.3 | SPX       | 0.642713176 | 1.61E-52    |
| AC096669.3 | APOD      | 0.082729451 | 0.083380189 |
| AC096669.3 | DPP6      | 0.513293602 | 7.07E-31    |
| AC096669.3 | MMRN1     | 0.369729378 | 1.15E-15    |
| AC096669.3 | WDR72     | 0.587245435 | 4.79E-42    |
| AC096669.3 | MPPED2    | 0.639753826 | 6.61E-52    |
| AC096669.3 | PAPSS2    | 0.420093652 | 3.38E-20    |
| AC096669.3 | DCN       | 0.091545228 | 0.05528329  |
| AC096669.3 | SORBS2    | 0.584028905 | 1.69E-41    |
| AC096669.3 | EGR2      | 0.291827489 | 4.57E-10    |
| AC096669.3 | EDN3      | 0.528518837 | 5.90E-33    |
| AC096669.3 | DIO2      | 0.643676787 | 1.01E-52    |
| AC096669.3 | ITPR1     | 0.572238174 | 1.51E-39    |
| AC096669.3 | CFD       | 0.242476476 | 2.71E-07    |
| AC096669.3 | CPXM1     | 0.325906259 | 2.54E-12    |
| AC096669.3 | ELMO1     | 0.577993885 | 1.72E-40    |
| AC096669.3 | GPC3      | 0.429320251 | 4.09E-21    |
| AC096669.3 | MYOC      | 0.185724404 | 9.06E-05    |
| AC096669.3 | DEPTOR    | 0.576436048 | 3.11E-40    |
| AC096669.3 | DGKI      | 0.500924109 | 2.90E-29    |
| AC096669.3 | CARTPT    | 0.57356599  | 9.18E-40    |
| AC096669.3 | IYD       | 0.593653247 | 3.74E-43    |
| AC096669.3 | LYVE1     | 0.329281524 | 1.46E-12    |

|            |            |             |             |
|------------|------------|-------------|-------------|
| AC096669.3 | CLCNKB     | 0.584988119 | 1.16E-41    |
| AC096669.3 | NCAM1      | 0.476998369 | 2.52E-26    |
| AC096669.3 | HBA2       | 0.236637214 | 5.29E-07    |
| AC096669.3 | GLT8D2     | 0.451030648 | 2.19E-23    |
| AC096669.3 | OGDHL      | 0.623041201 | 1.45E-48    |
| AC096669.3 | LIFR       | 0.506007575 | 6.42E-30    |
| AC096669.3 | CSGALNACT1 | 0.40675998  | 6.37E-19    |
| AC096669.3 | RAP1GAP    | 0.561184515 | 8.68E-38    |
| AC096669.3 | COL9A3     | 0.516389699 | 2.72E-31    |
| AC096669.3 | FBLN1      | 0.102738754 | 0.031383459 |
| AC096669.3 | EFEMP1     | 0.337849624 | 3.50E-13    |
| AC096669.3 | AOX1       | 0.408428973 | 4.44E-19    |
| AC096669.3 | GRIN2C     | 0.555231203 | 7.23E-37    |
| AC096669.3 | C11orf74   | 0.61364496  | 9.01E-47    |
| AC096669.3 | PPARGC1A   | 0.646636563 | 2.41E-53    |
| AC096669.3 | ANGPTL1    | 0.491972437 | 3.89E-28    |
| AC096669.3 | SCARA5     | 0.188724265 | 6.93E-05    |
| AC096669.3 | LTF        | 0.476781617 | 2.68E-26    |
| AC096669.3 | CA4        | 0.514372368 | 5.08E-31    |
| AC096669.3 | TG         | 0.585178912 | 1.08E-41    |
| AC096669.3 | FCGBP      | 0.540294018 | 1.23E-34    |
| AC096669.3 | PBX4       | 0.497433659 | 8.05E-29    |
| AC096669.3 | CYR61      | 0.346208064 | 8.31E-14    |
| AC096669.3 | FOS        | 0.327928949 | 1.83E-12    |
| AC096669.3 | KHDRBS2    | 0.608691715 | 7.50E-46    |
| AC096669.3 | MUM1L1     | 0.411874086 | 2.10E-19    |
| AC096669.3 | RGS16      | 0.555988134 | 5.54E-37    |
| AC096669.3 | MT1M       | 0.465726256 | 5.11E-25    |
| AC096669.3 | LRP2       | 0.555379298 | 6.87E-37    |
| AC096669.3 | MAFB       | 0.467042232 | 3.62E-25    |
| AC096669.3 | KCNK2      | 0.490741998 | 5.52E-28    |
| AC096669.3 | TBC1D4     | 0.524283001 | 2.29E-32    |
| AC096669.3 | MIOX       | 0.587625553 | 4.12E-42    |
| AC096669.3 | TPPP       | 0.506555697 | 5.45E-30    |
| AC096669.3 | FMOD       | 0.469581695 | 1.85E-25    |
| AC096669.3 | CITED2     | 0.437031824 | 6.67E-22    |
| AC096669.3 | RGS8       | 0.565304351 | 1.95E-38    |
| AC096669.3 | ABI3BP     | 0.390257866 | 2.02E-17    |
| AC096669.3 | ADH1B      | 0.2562731   | 5.17E-08    |
| AC096669.3 | OGN        | 0.161193913 | 0.000699048 |
| AC096669.3 | NR4A1      | 0.2293797   | 1.19E-06    |
| AC096669.3 | FOXJ1      | 0.539490448 | 1.61E-34    |
| AC096669.3 | ALDH1A1    | 0.507612365 | 3.97E-30    |
| AC096669.3 | OCA2       | 0.355838998 | 1.50E-14    |
| AC096669.3 | TMEM139    | 0.312935448 | 1.98E-11    |
| AC096669.3 | ARHGAP24   | 0.592385926 | 6.22E-43    |
| AC096669.3 | SLC25A15   | 0.55695742  | 3.93E-37    |
| AC096669.3 | DES        | 0.177530651 | 0.000184889 |
| AC096669.3 | GDF10      | 0.372367376 | 6.93E-16    |
| AC096669.3 | KIAA1324   | 0.474870991 | 4.49E-26    |
| AC096669.3 | JUN        | 0.367973514 | 1.60E-15    |



|            |          |             |             |
|------------|----------|-------------|-------------|
| AC096669.3 | C7       | 0.045515859 | 0.34138243  |
| AC096669.3 | LGI3     | 0.645959921 | 3.35E-53    |
| AC096669.3 | CDON     | 0.630515751 | 4.93E-50    |
| AC096669.3 | BCL2     | 0.56649438  | 1.26E-38    |
| AC096669.3 | HLF      | 0.602622508 | 9.58E-45    |
| AC096669.3 | EGR1     | 0.361135887 | 5.71E-15    |
| AC096669.3 | IP6K3    | 0.553297313 | 1.43E-36    |
| AC096669.3 | SCUBE3   | 0.451226973 | 2.09E-23    |
| AC096669.3 | PKNOX2   | 0.480113333 | 1.08E-26    |
| AC096669.3 | SMAD9    | 0.427955888 | 5.61E-21    |
| AC096669.3 | IQGAP2   | 0.619545928 | 6.86E-48    |
| AC096669.3 | GNA14    | 0.606081609 | 2.26E-45    |
| AC096669.3 | LAYN     | 0.405155899 | 8.99E-19    |
| AC096669.3 | AVPR1A   | 0.550808066 | 3.40E-36    |
| AC096669.3 | PDLIM3   | 0.419567091 | 3.80E-20    |
| AC096669.3 | GPM6A    | 0.592405502 | 6.17E-43    |
| AC096669.3 | SDPR     | 0.450792333 | 2.33E-23    |
| AC096669.3 | CRYAB    | 0.308817296 | 3.73E-11    |
| AC096669.3 | FOXA2    | 0.36100014  | 5.85E-15    |
| AC096669.3 | C8orf88  | 0.514898959 | 4.32E-31    |
| AC096669.3 | ISM1     | 0.3825694   | 9.48E-17    |
| AC096669.3 | BMP2     | 0.282827729 | 1.61E-09    |
| AC096669.3 | ID4      | 0.464606038 | 6.85E-25    |
| AC096669.3 | NUPR1    | 0.454869632 | 8.36E-24    |
| AC096669.3 | SERTM1   | 0.580077576 | 7.76E-41    |
| AC096669.3 | IRS1     | 0.584388504 | 1.47E-41    |
| AC096669.3 | FIBIN    | 0.265573507 | 1.60E-08    |
| AC096669.3 | PODN     | 0.128178071 | 0.007165087 |
| AC096669.3 | TDRD9    | 0.436169212 | 8.19E-22    |
| AC096669.3 | EPHA3    | 0.312856152 | 2.01E-11    |
| AC096669.3 | AIF1L    | 0.424804894 | 1.16E-20    |
| AC096669.3 | EBF4     | 0.564348418 | 2.76E-38    |
| AC096669.3 | ADM2     | 0.564018183 | 3.12E-38    |
| AC096669.3 | GSTM3    | 0.563120108 | 4.32E-38    |
| AC096669.3 | HSD17B6  | 0.422032649 | 2.18E-20    |
| AC096669.3 | AGR3     | 0.333945256 | 6.76E-13    |
| AC096669.3 | EPHB1    | 0.505774509 | 6.88E-30    |
| AC096669.3 | TMOD1    | 0.332248108 | 8.97E-13    |
| AC096669.3 | WASF3    | 0.605744423 | 2.60E-45    |
| AC096669.3 | SELV     | 0.612514261 | 1.47E-46    |
| AC096669.3 | ENPP1    | 0.446788373 | 6.28E-23    |
| AC096669.3 | SYNE1    | 0.522978108 | 3.46E-32    |
| AC096669.3 | PLCH1    | 0.474573524 | 4.87E-26    |
| AC096669.3 | CCDC146  | 0.545198181 | 2.34E-35    |
| AC096669.3 | SLC16A2  | 0.486605263 | 1.78E-27    |
| AC096669.3 | IER2     | 0.410395546 | 2.90E-19    |
| AC096669.3 | KCNAB1   | 0.532366954 | 1.69E-33    |
| AC096669.3 | SYNDIG1  | 0.467669225 | 3.07E-25    |
| AC096669.3 | C16orf89 | 0.642626078 | 1.68E-52    |
| AC096669.3 | CTGF     | 0.221234749 | 2.86E-06    |
| AC096669.3 | NR4A3    | 0.094109232 | 0.048774137 |

|            |          |              |             |
|------------|----------|--------------|-------------|
| AC096669.3 | KIAA1456 | 0.616520474  | 2.59E-47    |
| AC096669.3 | AQP4     | 0.50839185   | 3.14E-30    |
| AC096669.3 | RNF150   | 0.474134345  | 5.48E-26    |
| AC096669.3 | C1S      | 0.012439852  | 0.794932593 |
| AC096669.3 | PFKFB2   | 0.574622734  | 6.17E-40    |
| AC096669.3 | PROX1    | 0.496600694  | 1.03E-28    |
| AC096669.3 | TCF7L1   | 0.519073427  | 1.18E-31    |
| AC096669.3 | HSPB6    | 0.258896315  | 3.73E-08    |
| AC096669.3 | FHDC1    | 0.473665661  | 6.22E-26    |
| AC096669.3 | PRR15L   | 0.480442717  | 9.84E-27    |
| AC096669.3 | SLC1A1   | 0.492799159  | 3.07E-28    |
| AC096669.3 | BTBD11   | 0.584818746  | 1.24E-41    |
| AC096669.3 | TRIM58   | 0.534900034  | 7.38E-34    |
| AC096669.3 | LRIG1    | 0.529128011  | 4.85E-33    |
| AC096669.3 | ROR2     | 0.314681524  | 1.51E-11    |
| AC096669.3 | GPR125   | 0.498501107  | 5.90E-29    |
| AC096669.3 | FLRT1    | 0.582271622  | 3.33E-41    |
| AC096669.3 | PGF      | 0.481322919  | 7.72E-27    |
| AC096669.3 | DUSP1    | 0.290356609  | 5.63E-10    |
| AC096669.3 | PLA2G7   | 0.319191051  | 7.45E-12    |
| AC096669.3 | PLSCR4   | 0.439672713  | 3.54E-22    |
| AC096669.3 | FAM46B   | 0.387774576  | 3.34E-17    |
| AC096669.3 | GLDC     | 0.450419968  | 2.55E-23    |
| AC096669.3 | ZBTB16   | 0.387592152  | 3.47E-17    |
| AC096669.3 | OMD      | 0.094905657  | 0.046887772 |
| AC096669.3 | HSD11B2  | 0.506186027  | 6.09E-30    |
| AC096669.3 | FGL2     | 0.132433396  | 0.005450516 |
| AC096669.3 | CLCNKA   | 0.603004258  | 8.17E-45    |
| AC096669.3 | GATM     | 0.585018759  | 1.15E-41    |
| AC096669.3 | TNS3     | 0.375806245  | 3.57E-16    |
| AC096669.3 | TOB1     | 0.2703805    | 8.59E-09    |
| AC096669.3 | MARC2    | 0.654374252  | 5.26E-55    |
| AC096669.3 | LRRC2    | 0.606285169  | 2.07E-45    |
| AC096669.3 | SORD     | 0.349940232  | 4.31E-14    |
| AC096669.3 | RIMS4    | 0.401716516  | 1.87E-18    |
| AC096669.3 | SLC29A4  | 0.485443908  | 2.46E-27    |
| AC096669.3 | SLC39A14 | 0.610944918  | 2.87E-46    |
| AC096669.3 | FAXDC2   | 0.608794701  | 7.18E-46    |
| AC096669.3 | HSPB8    | 0.27757801   | 3.30E-09    |
| AC096669.3 | CCL19    | -0.043158933 | 0.366991922 |
| AC096669.3 | KCNIP3   | 0.598717279  | 4.79E-44    |
| AC096669.3 | CGNL1    | 0.574458325  | 6.56E-40    |
| AC096669.3 | ATF3     | 0.055332554  | 0.247302257 |
| AC096669.3 | SGCD     | 0.31862165   | 8.16E-12    |
| AC096669.3 | STARD13  | 0.532856633  | 1.44E-33    |
| AC096669.3 | LDHD     | 0.638852062  | 1.01E-51    |
| AC096669.3 | RCAN1    | 0.316721521  | 1.10E-11    |
| AC096669.3 | ID3      | 0.378881915  | 1.96E-16    |
| AC096669.3 | SYTL3    | 0.598179512  | 5.97E-44    |
| AC096669.3 | MT1E     | 0.440323111  | 3.03E-22    |
| AC096669.3 | CAMK1D   | 0.529509739  | 4.29E-33    |

|            |          |             |             |
|------------|----------|-------------|-------------|
| AC096669.3 | PRKCQ    | 0.571259526 | 2.17E-39    |
| AC096669.3 | NUAK2    | 0.370717673 | 9.49E-16    |
| AC096669.3 | LIPG     | 0.531507038 | 2.24E-33    |
| AC096669.3 | SLC25A25 | 0.31267841  | 2.06E-11    |
| AC096669.3 | PRKX     | 0.185612329 | 9.15E-05    |
| AC096669.3 | SRPX     | 0.132536098 | 0.005414139 |
| AC096669.3 | FAM189A1 | 0.477915169 | 1.97E-26    |
| AC096669.3 | PLEKHH1  | 0.520849718 | 6.78E-32    |
| AC096669.3 | WNT11    | 0.372237918 | 7.10E-16    |
| AC096669.3 | SNAI1    | 0.268769327 | 1.06E-08    |
| AC096669.3 | FDCSP    | 0.012352018 | 0.796348658 |
| AC096669.3 | MT1X     | 0.437028136 | 6.67E-22    |
| AC096669.3 | ACACB    | 0.592925112 | 5.01E-43    |
| AC096669.3 | ARC      | 0.101639956 | 0.033251102 |
| AC096669.3 | KLK4     | 0.267478843 | 1.25E-08    |
| AC096669.3 | ZFPM2    | 0.251455668 | 9.32E-08    |
| AC096669.3 | AKAP12   | 0.289143619 | 6.69E-10    |
| AC096669.3 | GJB6     | 0.37853996  | 2.10E-16    |
| AC096669.3 | ERO1LB   | 0.577830895 | 1.83E-40    |
| AC096669.3 | DNALI1   | 0.429533158 | 3.89E-21    |
| AC096669.3 | HKDC1    | 0.412197938 | 1.95E-19    |
| AC096669.3 | ZFP36L2  | 0.476163987 | 3.17E-26    |
| AC096669.3 | CAPSL    | 0.504645201 | 9.64E-30    |
| AC096669.3 | CYP7B1   | 0.426506995 | 7.84E-21    |
| AC096669.3 | CPQ      | 0.470934837 | 1.29E-25    |
| AC096669.3 | RPS6KA6  | 0.509806149 | 2.05E-30    |
| AC096669.3 | TLE1     | 0.426282583 | 8.26E-21    |
| AC096669.3 | TP53INP2 | 0.48423872  | 3.44E-27    |
| AC096669.3 | KATNAL2  | 0.637053359 | 2.37E-51    |
| AC096669.3 | SGPP2    | 0.20853261  | 1.06E-05    |
| AC096669.3 | CTH      | 0.495321742 | 1.49E-28    |
| AC096669.3 | KIF12    | 0.368391557 | 1.48E-15    |
| AC096669.3 | TMEM220  | 0.568201021 | 6.75E-39    |
| AC096669.3 | CENPJ    | 0.459860467 | 2.34E-24    |
| AC096669.3 | FAM155B  | 0.410040486 | 3.13E-19    |
| AC096669.3 | WFS1     | 0.488778319 | 9.63E-28    |
| AC096669.3 | SELENBP1 | 0.504758554 | 9.32E-30    |
| AC096669.3 | SNTA1    | 0.562221182 | 5.97E-38    |
| AC096669.3 | FRAS1    | 0.225318857 | 1.85E-06    |
| AC096669.3 | FBLN7    | 0.558522632 | 2.25E-37    |
| AC096669.3 | AGPAT9   | 0.552976156 | 1.60E-36    |
| AC096669.3 | GPR83    | 0.436264538 | 8.00E-22    |
| AC096669.3 | PRTG     | 0.511280132 | 1.31E-30    |
| AC096669.3 | EGR3     | 0.083162814 | 0.081770815 |
| AC096669.3 | GRAMD2   | 0.349259051 | 4.86E-14    |
| AC096669.3 | HYOU1    | 0.524482731 | 2.15E-32    |
| AC096669.3 | FBLN5    | 0.200490786 | 2.32E-05    |
| AC096669.3 | ITM2A    | 0.452080364 | 1.69E-23    |
| AC096669.3 | SRF      | 0.340223118 | 2.34E-13    |
| AC096669.3 | FGFR2    | 0.411132334 | 2.47E-19    |
| AC096669.3 | MT1A     | 0.223045022 | 2.36E-06    |

|            |          |              |             |
|------------|----------|--------------|-------------|
| AC096669.3 | MAMDC2   | 0.200809815  | 2.25E-05    |
| AC096669.3 | FHL2     | 0.261082847  | 2.84E-08    |
| AC096669.3 | FTCDNL1  | 0.561431624  | 7.94E-38    |
| AC096669.3 | PKIA     | 0.349025135  | 5.07E-14    |
| AC096669.3 | DNAJB4   | 0.393026422  | 1.15E-17    |
| AC096669.3 | SLC25A33 | 0.503927575  | 1.19E-29    |
| AC096669.3 | EYA2     | 0.344775342  | 1.07E-13    |
| AC096669.3 | LPAR1    | 0.19741384   | 3.11E-05    |
| AC096669.3 | STX11    | 0.366693002  | 2.03E-15    |
| AC096669.3 | ARHGEF28 | 0.58265718   | 2.87E-41    |
| AC096669.3 | OR2W3    | 0.554388593  | 9.73E-37    |
| AC096669.3 | ALDH1B1  | 0.520251469  | 8.18E-32    |
| AC096669.3 | CXCL12   | 0.18651849   | 8.45E-05    |
| AC096669.3 | OLFM2    | 0.343713143  | 1.28E-13    |
| AC096669.3 | TUB      | 0.403351521  | 1.32E-18    |
| AC096669.3 | HTRA3    | 0.168905662  | 0.000378775 |
| AC096669.3 | CKB      | 0.497658639  | 7.54E-29    |
| AC096669.3 | RGS2     | 0.047844669  | 0.317227327 |
| AC096669.3 | SHANK2   | 0.518848589  | 1.27E-31    |
| AC096669.3 | CNTFR    | 0.446848991  | 6.18E-23    |
| AC096669.3 | CYTH3    | 0.479485205  | 1.28E-26    |
| AC096669.3 | PLAC9    | 0.285051     | 1.19E-09    |
| AC096669.3 | WVOX     | 0.560636109  | 1.06E-37    |
| AC096669.3 | NPR3     | 0.301764051  | 1.08E-10    |
| AC096669.3 | SDC2     | 0.369780446  | 1.13E-15    |
| AC096669.3 | KLF15    | 0.521282088  | 5.92E-32    |
| AC096669.3 | TMEM164  | 0.492954064  | 2.93E-28    |
| AC096669.3 | LONRF3   | 0.213193494  | 6.60E-06    |
| AC096669.3 | GBP1     | 0.166922974  | 0.00044454  |
| AC096669.3 | ARHGAP6  | 0.442083515  | 1.98E-22    |
| AC096669.3 | TMEM119  | 0.065960794  | 0.167711511 |
| AC096669.3 | SH3RF1   | 0.442494607  | 1.79E-22    |
| AC096669.3 | CRELD2   | 0.455058297  | 7.97E-24    |
| AC096669.3 | PCP4     | 0.090253934  | 0.058825379 |
| AC096669.3 | GCSH     | 0.614130099  | 7.30E-47    |
| AC096669.3 | IMPA2    | 0.537362188  | 3.27E-34    |
| AC096669.3 | C1R      | -0.007499375 | 0.875494243 |
| AC096669.3 | SUCNR1   | 0.350394589  | 3.98E-14    |
| AC096669.3 | SFRP1    | 0.350819725  | 3.69E-14    |
| AC096669.3 | UGT8     | 0.569190733  | 4.68E-39    |
| AC096669.3 | TLE4     | 0.11391157   | 0.016954904 |
| AC096669.3 | ANTXR1   | 0.310934178  | 2.70E-11    |
| AC096669.3 | GPX3     | 0.410502929  | 2.83E-19    |
| AC096669.3 | DPY19L2  | 0.52985799   | 3.83E-33    |
| AC096669.3 | FAM46C   | 0.402652892  | 1.53E-18    |
| AC096669.3 | IL33     | 0.201661228  | 2.07E-05    |
| AC096669.3 | PEG3     | 0.512953437  | 7.85E-31    |
| AC096669.3 | FAHD2A   | 0.611288062  | 2.48E-46    |
| AC096669.3 | PTGDS    | 0.027841466  | 0.560706045 |
| AC096669.3 | CHCHD10  | 0.466958964  | 3.70E-25    |
| AC096669.3 | CD36     | 0.531739252  | 2.08E-33    |

|            |          |             |             |
|------------|----------|-------------|-------------|
| AC096669.3 | ANKRD37  | 0.361204402 | 5.64E-15    |
| AC096669.3 | TSPAN33  | 0.435611302 | 9.35E-22    |
| AC096669.3 | PRDM16   | 0.465403255 | 5.57E-25    |
| AC096669.3 | UST      | 0.536456452 | 4.42E-34    |
| AC096669.3 | NEXN     | 0.4648679   | 6.40E-25    |
| AC096669.3 | NUPR1L   | 0.272005813 | 6.94E-09    |
| AC096669.3 | SLC24A3  | 0.547631963 | 1.02E-35    |
| AC096669.3 | MARC1    | 0.545754247 | 1.94E-35    |
| AC096669.3 | MYH11    | 0.244423559 | 2.15E-07    |
| AC096669.3 | APOA1    | 0.450774192 | 2.34E-23    |
| AC096669.3 | TMEM178B | 0.334686288 | 5.97E-13    |
| AC096669.3 | CAPN6    | 0.135903374 | 0.004336053 |
| AC096669.3 | PPM1L    | 0.546603525 | 1.45E-35    |
| AC096669.3 | FZD8     | 0.567886531 | 7.58E-39    |
| AC096669.3 | RCAN2    | 0.507216593 | 4.47E-30    |
| AC096669.3 | COPZ2    | 0.555535479 | 6.50E-37    |
| AC096669.3 | GAS1     | 0.230916116 | 1.00E-06    |
| AC096669.3 | DACT1    | 0.377904828 | 2.37E-16    |
| AC096669.3 | WBSCR17  | 0.486346522 | 1.91E-27    |
| AC096669.3 | NCS1     | 0.392934785 | 1.17E-17    |
| AC096669.3 | SPIRE2   | 0.407894383 | 4.99E-19    |
| AC096669.3 | C15orf52 | 0.428235056 | 5.26E-21    |
| AC096669.3 | SPAG5    | 0.40857755  | 4.30E-19    |
| AC096669.3 | ARL4D    | 0.453562593 | 1.16E-23    |
| AC096669.3 | FAM189A2 | 0.356246902 | 1.39E-14    |
| AC096669.3 | MAP1LC3A | 0.510602071 | 1.61E-30    |
| AC096669.3 | KLF6     | 0.038937539 | 0.415751126 |
| AC096669.3 | ADD3     | 0.326230111 | 2.41E-12    |
| AC096669.3 | TSPAN7   | 0.353501042 | 2.29E-14    |
| AC096669.3 | KLF9     | 0.333104762 | 7.78E-13    |
| AC096669.3 | KCNQ1    | 0.631103309 | 3.76E-50    |
| AC096669.3 | MAN1A1   | 0.100287524 | 0.035679232 |
| AC096669.3 | MLF1     | 0.320443193 | 6.11E-12    |
| AC096669.3 | RARB     | 0.514450418 | 4.96E-31    |
| AC096669.3 | CDC42EP2 | 0.358511737 | 9.24E-15    |
| AC096669.3 | FAM3B    | 0.231720852 | 9.19E-07    |
| AC096669.3 | GADD45B  | 0.211253504 | 8.04E-06    |
| AC096669.3 | TMEM47   | 0.361967149 | 4.90E-15    |
| AC096669.3 | SDF2L1   | 0.433347602 | 1.60E-21    |
| AC096669.3 | CCDC85A  | 0.30998007  | 3.13E-11    |
| AC096669.3 | CRYBG3   | 0.202059971 | 1.99E-05    |
| AC096669.3 | FBLN2    | 0.020598705 | 0.666900371 |
| AC096669.3 | PEBP4    | 0.383219089 | 8.33E-17    |
| AC096669.3 | CDADC1   | 0.612066554 | 1.78E-46    |
| AC096669.3 | FAM63A   | 0.53766618  | 2.96E-34    |
| AC096669.3 | GLUL     | 0.373769653 | 5.29E-16    |
| AC096669.3 | FREM2    | 0.563673763 | 3.53E-38    |
| AC096669.3 | ACKR3    | 0.404739133 | 9.83E-19    |
| AC096669.3 | DENND6A  | 0.542510906 | 5.83E-35    |
| AC096669.3 | CLDN8    | 0.221430365 | 2.81E-06    |
| AC096669.3 | UTS2R    | 0.148865667 | 0.001762196 |

|            |          |              |             |
|------------|----------|--------------|-------------|
| AC096669.3 | SCNN1B   | 0.349721069  | 4.48E-14    |
| AC096669.3 | TTC30A   | 0.53574307   | 5.59E-34    |
| AC096669.3 | CORO2B   | 0.488133736  | 1.16E-27    |
| AC096669.3 | TC2N     | 0.251117205  | 9.70E-08    |
| AC096669.3 | ALDH2    | 0.527395553  | 8.47E-33    |
| AC096669.3 | GPR183   | 0.02099093   | 0.660949074 |
| AC096669.3 | C4orf47  | 0.426748572  | 7.42E-21    |
| AC096669.3 | SLC25A42 | 0.597174479  | 9.00E-44    |
| AC096669.3 | LGMN     | 0.536211755  | 4.79E-34    |
| AC096669.3 | ACSF2    | 0.594394574  | 2.78E-43    |
| AC096669.3 | KIAA1467 | 0.570602886  | 2.78E-39    |
| AC096669.3 | PRKG1    | 0.510817263  | 1.51E-30    |
| AC096669.3 | GNAI1    | 0.565176418  | 2.04E-38    |
| AC096669.3 | ABCC4    | 0.276535244  | 3.80E-09    |
| AC096669.3 | PRPS1    | 0.575455414  | 4.51E-40    |
| AC096669.3 | TSPAN5   | 0.34061435   | 2.19E-13    |
| AC096669.3 | CR2      | 0.216542404  | 4.68E-06    |
| AC096669.3 | CCDC170  | 0.475551463  | 3.74E-26    |
| AC096669.3 | RRAD     | -0.045122357 | 0.345576904 |
| AC096669.3 | SCGB2A1  | 0.482938631  | 4.94E-27    |
| AC096669.3 | SESN3    | 0.181384666  | 0.000132729 |
| AC096669.3 | SGK223   | 0.228044148  | 1.38E-06    |
| AC096669.3 | NDRG2    | 0.608541209  | 8.00E-46    |
| AC096669.3 | C3orf52  | 0.296110759  | 2.47E-10    |
| AC096669.3 | FLRT3    | -0.244894797 | 2.04E-07    |
| AC096669.3 | MST1R    | -0.573605927 | 9.04E-40    |
| AC096669.3 | SDC1     | -0.195808624 | 3.61E-05    |
| AC096669.3 | ST8SIA4  | -0.447191663 | 5.68E-23    |
| AC096669.3 | UBTD1    | -0.355460466 | 1.61E-14    |
| AC096669.3 | EPHA2    | -0.407112912 | 5.90E-19    |
| AC096669.3 | TMEM130  | -0.364413556 | 3.11E-15    |
| AC096669.3 | SPINK2   | -0.332018589 | 9.31E-13    |
| AC096669.3 | MMP16    | -0.433920265 | 1.39E-21    |
| AC096669.3 | SIGLEC15 | -0.465900027 | 4.89E-25    |
| AC096669.3 | RIN1     | -0.582266799 | 3.34E-41    |
| AC096669.3 | IL1RN    | -0.397083152 | 4.95E-18    |
| AC096669.3 | FCER1G   | -0.273880738 | 5.41E-09    |
| AC096669.3 | CD276    | -0.588793342 | 2.60E-42    |
| AC096669.3 | CTSB     | -0.293256523 | 3.72E-10    |
| AC096669.3 | FAM171A2 | -0.149308869 | 0.001706565 |
| AC096669.3 | ASPHD1   | -0.474473943 | 5.00E-26    |
| AC096669.3 | C15orf48 | -0.295200626 | 2.82E-10    |
| AC096669.3 | DYSF     | -0.194857921 | 3.95E-05    |
| AC096669.3 | PDZRN4   | -0.250839172 | 1.00E-07    |
| AC096669.3 | EFHD2    | -0.270130696 | 8.87E-09    |
| AC096669.3 | ASF1B    | -0.246265812 | 1.73E-07    |
| AC096669.3 | AQP1     | -0.13118934  | 0.00590895  |
| AC096669.3 | ARRDC2   | -0.447870291 | 4.81E-23    |
| AC096669.3 | PRSS1    | -0.396603589 | 5.47E-18    |
| AC096669.3 | MAPK13   | -0.377427774 | 2.61E-16    |
| AC096669.3 | CST5     | -0.540669393 | 1.08E-34    |

|            |          |              |             |
|------------|----------|--------------|-------------|
| AC096669.3 | AHR      | -0.483033106 | 4.81E-27    |
| AC096669.3 | BAX      | -0.382341725 | 9.92E-17    |
| AC096669.3 | C1orf115 | -0.207020876 | 1.23E-05    |
| AC096669.3 | PLK3     | -0.452978581 | 1.35E-23    |
| AC096669.3 | JAG2     | -0.230872709 | 1.01E-06    |
| AC096669.3 | RAD23B   | -0.416559795 | 7.45E-20    |
| AC096669.3 | CA12     | 0.109194938  | 0.022125233 |
| AC096669.3 | ADTRP    | -0.346174586 | 8.36E-14    |
| AC096669.3 | UCP2     | -0.361436049 | 5.40E-15    |
| AC096669.3 | IGFBP2   | -0.241189297 | 3.14E-07    |
| AC096669.3 | LOXL2    | -0.245687191 | 1.86E-07    |
| AC096669.3 | GPX1     | -0.283370603 | 1.50E-09    |
| AC096669.3 | P3H3     | -0.411075734 | 2.50E-19    |
| AC096669.3 | C2orf81  | -0.417668806 | 5.82E-20    |
| AC096669.3 | CDT1     | -0.277560704 | 3.31E-09    |
| AC096669.3 | SNX25    | -0.25047319  | 1.05E-07    |
| AC096669.3 | MTHFD1L  | -0.427076112 | 6.88E-21    |
| AC096669.3 | CDC42BPG | -0.495258351 | 1.51E-28    |
| AC096669.3 | MSN      | -0.415332903 | 9.79E-20    |
| AC096669.3 | SIGLEC6  | -0.476971906 | 2.54E-26    |
| AC096669.3 | F2R      | -0.181966833 | 0.000126172 |
| AC096669.3 | TMEM184A | -0.459937068 | 2.30E-24    |
| AC096669.3 | CKS2     | -0.18989645  | 6.23E-05    |
| AC096669.3 | TAX1BP3  | -0.511686542 | 1.16E-30    |
| AC096669.3 | PMEP1    | -0.451160585 | 2.12E-23    |
| AC096669.3 | CXCL16   | -0.495683753 | 1.34E-28    |
| AC096669.3 | FAXC     | -0.534972663 | 7.21E-34    |
| AC096669.3 | VTCN1    | -0.452400238 | 1.56E-23    |
| AC096669.3 | SH2D4A   | -0.407939493 | 4.94E-19    |
| AC096669.3 | RNF24    | -0.378840068 | 1.98E-16    |
| AC096669.3 | LY6G6C   | -0.485604587 | 2.35E-27    |
| AC096669.3 | NID1     | -0.32769943  | 1.90E-12    |
| AC096669.3 | STAC     | -0.564189826 | 2.93E-38    |
| AC096669.3 | RAB34    | -0.539368281 | 1.68E-34    |
| AC096669.3 | HES4     | -0.252412896 | 8.29E-08    |
| AC096669.3 | EPHA10   | -0.549619474 | 5.13E-36    |
| AC096669.3 | ENTPD2   | -0.478092912 | 1.87E-26    |
| AC096669.3 | DDB2     | -0.490871794 | 5.32E-28    |
| AC096669.3 | NKAIN4   | -0.271767261 | 7.16E-09    |
| AC096669.3 | TRIM29   | -0.467015989 | 3.65E-25    |
| AC096669.3 | ADCY8    | -0.528593504 | 5.76E-33    |
| AC096669.3 | SFTA2    | -0.310000355 | 3.12E-11    |
| AC096669.3 | NRIP1    | -0.472643464 | 8.18E-26    |
| AC096669.3 | VWA1     | -0.157776111 | 0.000909404 |
| AC096669.3 | APLNR    | -0.066108464 | 0.16675997  |
| AC096669.3 | REN      | -0.447093676 | 5.82E-23    |
| AC096669.3 | EDIL3    | -0.165378755 | 0.000502957 |
| AC096669.3 | AGR1     | -0.401014199 | 2.17E-18    |
| AC096669.3 | TREM1    | -0.419520989 | 3.84E-20    |
| AC096669.3 | SRL      | -0.218769192 | 3.71E-06    |
| AC096669.3 | RASGRF1  | -0.517026905 | 2.24E-31    |

|            |          |              |             |
|------------|----------|--------------|-------------|
| AC096669.3 | RMI2     | -0.413408233 | 1.50E-19    |
| AC096669.3 | SAMD1    | -0.441439216 | 2.31E-22    |
| AC096669.3 | MGAT4B   | -0.487258641 | 1.48E-27    |
| AC096669.3 | NXN      | -0.568154776 | 6.86E-39    |
| AC096669.3 | SH3BGRL3 | -0.464041461 | 7.94E-25    |
| AC096669.3 | CA11     | -0.280243582 | 2.30E-09    |
| AC096669.3 | PLD3     | -0.24206354  | 2.84E-07    |
| AC096669.3 | LURAP1L  | -0.335211146 | 5.47E-13    |
| AC096669.3 | CARNS1   | -0.255921503 | 5.40E-08    |
| AC096669.3 | PDLIM7   | -0.459254469 | 2.74E-24    |
| AC096669.3 | BCL2L1   | -0.573711182 | 8.69E-40    |
| AC096669.3 | GGT6     | -0.177985995 | 0.000177852 |
| AC096669.3 | DPYSL3   | -0.338314336 | 3.24E-13    |
| AC096669.3 | FYN      | -0.467659721 | 3.08E-25    |
| AC096669.3 | TK1      | -0.257132366 | 4.65E-08    |
| AC096669.3 | AK1      | -0.152582708 | 0.001342932 |
| AC096669.3 | HIGD1B   | 0.002626561  | 0.95623744  |
| AC096669.3 | TMEM59L  | -0.460198363 | 2.15E-24    |
| AC096669.3 | MEGF9    | -0.313907287 | 1.71E-11    |
| AC096669.3 | ZFP36L1  | -0.432533646 | 1.93E-21    |
| AC096669.3 | ADRA1B   | -0.314820541 | 1.48E-11    |
| AC096669.3 | EPHA4    | -0.443492405 | 1.41E-22    |
| AC096669.3 | TCERG1L  | -0.204403818 | 1.59E-05    |
| AC096669.3 | NGFR     | -0.335559113 | 5.16E-13    |
| AC096669.3 | EBI3     | -0.478216183 | 1.81E-26    |
| AC096669.3 | S100A10  | -0.544744391 | 2.73E-35    |
| AC096669.3 | S100B    | -0.378855672 | 1.97E-16    |
| AC096669.3 | CD44     | -0.221776772 | 2.70E-06    |
| AC096669.3 | BHLHE41  | -0.406936871 | 6.13E-19    |
| AC096669.3 | FBXO2    | -0.388043673 | 3.17E-17    |
| AC096669.3 | SLC30A2  | -0.21875373  | 3.72E-06    |
| AC096669.3 | FRMD5    | -0.416521636 | 7.51E-20    |
| AC096669.3 | SAMD11   | -0.269235174 | 9.97E-09    |
| AC096669.3 | SIPAIL2  | -0.436110768 | 8.30E-22    |
| AC096669.3 | S100A16  | -0.528496053 | 5.95E-33    |
| AC096669.3 | PPL      | -0.510048842 | 1.90E-30    |
| AC096669.3 | ARHGDIB  | -0.206822139 | 1.25E-05    |
| AC096669.3 | CDC42EP3 | -0.455127522 | 7.83E-24    |
| AC096669.3 | RUNX2    | -0.4959032   | 1.26E-28    |
| AC096669.3 | LAMC2    | -0.469235289 | 2.03E-25    |
| AC096669.3 | BRINP1   | -0.458376111 | 3.43E-24    |
| AC096669.3 | GPRC5B   | -0.351027682 | 3.56E-14    |
| AC096669.3 | AQP5     | -0.220590876 | 3.07E-06    |
| AC096669.3 | PLAG1    | -0.339489451 | 2.65E-13    |
| AC096669.3 | PTPRU    | -0.539145429 | 1.81E-34    |
| AC096669.3 | ANGPTL4  | -0.432394771 | 2.00E-21    |
| AC096669.3 | PALM3    | -0.382973541 | 8.75E-17    |
| AC096669.3 | ACP5     | -0.343112251 | 1.42E-13    |
| AC096669.3 | DLG4     | -0.256888094 | 4.79E-08    |
| AC096669.3 | ETNK2    | -0.471789221 | 1.03E-25    |
| AC096669.3 | CD109    | -0.513873783 | 5.92E-31    |



|            |          |              |             |
|------------|----------|--------------|-------------|
| AC096669.3 | SNX22    | -0.413584131 | 1.44E-19    |
| AC096669.3 | TMEM98   | -0.51135347  | 1.28E-30    |
| AC096669.3 | CTHRC1   | -0.414884078 | 1.08E-19    |
| AC096669.3 | S100A2   | -0.430214765 | 3.32E-21    |
| AC096669.3 | C11orf80 | -0.563603545 | 3.62E-38    |
| AC096669.3 | SREBF1   | -0.471421678 | 1.13E-25    |
| AC096669.3 | PRSS22   | -0.509173464 | 2.48E-30    |
| AC096669.3 | CMTM3    | -0.497943906 | 6.94E-29    |
| AC096669.3 | RDH5     | -0.424355076 | 1.28E-20    |
| AC096669.3 | MYH10    | -0.454710614 | 8.70E-24    |
| AC096669.3 | EVPL     | -0.475842546 | 3.45E-26    |
| AC096669.3 | SCD      | -0.420980662 | 2.76E-20    |
| AC096669.3 | CD151    | -0.510055226 | 1.90E-30    |
| AC096669.3 | S100A4   | -0.456941971 | 4.94E-24    |
| AC096669.3 | BNIP1    | -0.388526259 | 2.87E-17    |
| AC096669.3 | MAP3K6   | -0.518324866 | 1.49E-31    |
| AC096669.3 | MANEAL   | -0.290279157 | 5.69E-10    |
| AC096669.3 | CD207    | -0.361264095 | 5.58E-15    |
| AC096669.3 | CD1A     | -0.376754826 | 2.97E-16    |
| AC096669.3 | C3       | -0.440666681 | 2.79E-22    |
| AC096669.3 | NT5E     | -0.460112258 | 2.20E-24    |
| AC096669.3 | CACNG4   | -0.510941038 | 1.45E-30    |
| AC096669.3 | FHOD1    | -0.389492565 | 2.36E-17    |
| AC096669.3 | LEMD1    | -0.564951438 | 2.22E-38    |
| AC096669.3 | ATP11A   | -0.283309464 | 1.51E-09    |
| AC096669.3 | PPAP2C   | -0.333886092 | 6.82E-13    |
| AC096669.3 | DRAM1    | -0.539979812 | 1.37E-34    |
| AC096669.3 | CDA      | -0.227493614 | 1.46E-06    |
| AC096669.3 | CCND2    | -0.324856258 | 3.01E-12    |
| AC096669.3 | LCN6     | -0.314590466 | 1.53E-11    |
| AC096669.3 | CDH4     | -0.357659906 | 1.08E-14    |
| AC096669.3 | MMP11    | -0.451823042 | 1.80E-23    |
| AC096669.3 | B3GAT1   | -0.388730102 | 2.76E-17    |
| AC096669.3 | SPP1     | -0.203146853 | 1.79E-05    |
| AC096669.3 | HLA-DQB1 | -0.264905802 | 1.74E-08    |
| AC096669.3 | SDC3     | -0.610725612 | 3.16E-46    |
| AC096669.3 | CX3CL1   | -0.393173241 | 1.11E-17    |
| AC096669.3 | SDK1     | -0.504528042 | 9.98E-30    |
| AC096669.3 | DOCK9    | -0.424665735 | 1.20E-20    |
| AC096669.3 | CSF2     | -0.519813222 | 9.38E-32    |
| AC096669.3 | GRHL3    | -0.548587206 | 7.33E-36    |
| AC096669.3 | TMEM92   | -0.595085455 | 2.10E-43    |
| AC096669.3 | BASP1    | -0.53930388  | 1.71E-34    |
| AC096669.3 | HRH1     | -0.585355661 | 1.00E-41    |
| AC096669.3 | ESM1     | -0.075961757 | 0.111984827 |
| AC096669.3 | B4GALNT3 | -0.488399995 | 1.07E-27    |
| AC096669.3 | LMO3     | -0.146446121 | 0.002096292 |
| AC096669.3 | C9orf16  | -0.458900118 | 3.00E-24    |
| AC096669.3 | SEMA3F   | -0.2765395   | 3.79E-09    |
| AC096669.3 | PLA2G12B | -0.187734242 | 7.57E-05    |
| AC096669.3 | KLK6     | -0.523367848 | 3.06E-32    |

|            |          |              |             |
|------------|----------|--------------|-------------|
| AC096669.3 | ST3GAL5  | -0.348345372 | 5.71E-14    |
| AC096669.3 | FAM132B  | -0.048325411 | 0.31238353  |
| AC096669.3 | CDKN1A   | -0.277048755 | 3.54E-09    |
| AC096669.3 | E2F1     | -0.274071673 | 5.28E-09    |
| AC096669.3 | B3GNT8   | -0.35571183  | 1.54E-14    |
| AC096669.3 | MTMR11   | -0.576718904 | 2.79E-40    |
| AC096669.3 | MYO1G    | -0.449979938 | 2.85E-23    |
| AC096669.3 | TMSB10   | -0.484342131 | 3.34E-27    |
| AC096669.3 | UNC5CL   | -0.534908404 | 7.36E-34    |
| AC096669.3 | ABR      | -0.465132315 | 5.97E-25    |
| AC096669.3 | PLP2     | -0.500282079 | 3.50E-29    |
| AC096669.3 | SRCIN1   | -0.321341551 | 5.30E-12    |
| AC096669.3 | PDE9A    | -0.496355855 | 1.10E-28    |
| AC096669.3 | TREM2    | -0.252818456 | 7.90E-08    |
| AC096669.3 | KDEL3    | -0.323548368 | 3.72E-12    |
| AC096669.3 | PC       | -0.484731803 | 3.00E-27    |
| AC096669.3 | C2CD4A   | -0.474713675 | 4.69E-26    |
| AC096669.3 | PELI1    | -0.535358931 | 6.35E-34    |
| AC096669.3 | SSX1     | -0.231730072 | 9.18E-07    |
| AC096669.3 | MROH6    | -0.504392429 | 1.04E-29    |
| AC096669.3 | ESPN     | -0.481871041 | 6.64E-27    |
| AC096669.3 | BMP1     | -0.427237258 | 6.63E-21    |
| AC096669.3 | TM4SF4   | -0.495849931 | 1.27E-28    |
| AC096669.3 | CORO2A   | -0.473624381 | 6.28E-26    |
| AC096669.3 | CD164L2  | -0.414422643 | 1.20E-19    |
| AC096669.3 | CTSS     | -0.351064706 | 3.53E-14    |
| AC096669.3 | CLU      | -0.556616687 | 4.43E-37    |
| AC096669.3 | TMSB4X   | -0.467245792 | 3.43E-25    |
| AC096669.3 | WNT10A   | -0.511104464 | 1.38E-30    |
| AC096669.3 | NAPSA    | -0.395861651 | 6.38E-18    |
| AC096669.3 | PLEKHA4  | -0.492178975 | 3.66E-28    |
| AC096669.3 | SFTPA1   | -0.096915052 | 0.042398624 |
| AC096669.3 | C1orf116 | -0.467913922 | 2.88E-25    |
| AC096669.3 | TM4SF1   | -0.467961727 | 2.84E-25    |
| AC096669.3 | SEL1L3   | -0.477416979 | 2.25E-26    |
| AC096669.3 | VASN     | -0.54015642  | 1.29E-34    |
| AC096669.3 | NPTXR    | -0.494342527 | 1.97E-28    |
| AC096669.3 | PDE4C    | -0.413255598 | 1.55E-19    |
| AC096669.3 | CDC42EP1 | -0.566777661 | 1.14E-38    |
| AC096669.3 | ENDOD1   | -0.552746779 | 1.73E-36    |
| AC096669.3 | RYR1     | -0.473921707 | 5.80E-26    |
| AC096669.3 | IL1RAP   | -0.543374937 | 4.35E-35    |
| AC096669.3 | SLC35F2  | -0.541369926 | 8.57E-35    |
| AC096669.3 | ISYNA1   | -0.416218069 | 8.04E-20    |
| AC096669.3 | HLA-G    | -0.445362035 | 8.91E-23    |
| AC096669.3 | CDKN2B   | -0.464806477 | 6.51E-25    |
| AC096669.3 | ALDH1A3  | -0.416794988 | 7.07E-20    |
| AC096669.3 | CLIP3    | -0.468549001 | 2.43E-25    |
| AC096669.3 | ULBP2    | -0.37212174  | 7.26E-16    |
| AC096669.3 | ETHE1    | -0.538523401 | 2.22E-34    |
| AC096669.3 | XPR1     | -0.518392813 | 1.46E-31    |

|            |          |              |             |
|------------|----------|--------------|-------------|
| AC096669.3 | SPTBN2   | -0.532432775 | 1.66E-33    |
| AC096669.3 | IVL      | -0.496288432 | 1.12E-28    |
| AC096669.3 | MARCO    | -0.380030504 | 1.57E-16    |
| AC096669.3 | PLXND1   | -0.345494682 | 9.41E-14    |
| AC096669.3 | EMILIN2  | -0.366338935 | 2.17E-15    |
| AC096669.3 | PLAUR    | -0.509797619 | 2.05E-30    |
| AC096669.3 | CDC42EP5 | -0.543960083 | 3.57E-35    |
| AC096669.3 | TRPC5    | -0.304205236 | 7.49E-11    |
| AC096669.3 | TMEM100  | -0.430195473 | 3.34E-21    |
| AC096669.3 | QSOX1    | -0.615812199 | 3.52E-47    |
| AC096669.3 | ARHGAP23 | -0.490731643 | 5.54E-28    |
| AC096669.3 | MDFI     | -0.381225621 | 1.24E-16    |
| AC096669.3 | FSTL3    | -0.562406442 | 5.59E-38    |
| AC096669.3 | INF2     | -0.487462343 | 1.40E-27    |
| AC096669.3 | TGFBR1   | -0.500471312 | 3.31E-29    |
| AC096669.3 | TGFBI    | -0.332644022 | 8.40E-13    |
| AC096669.3 | ERBB3    | -0.562580213 | 5.25E-38    |
| AC096669.3 | CCL18    | -0.301756816 | 1.08E-10    |
| AC096669.3 | CCL17    | -0.446222393 | 7.21E-23    |
| AC096669.3 | C16orf45 | -0.423693329 | 1.49E-20    |
| AC096669.3 | PRDM1    | -0.281165063 | 2.03E-09    |
| AC096669.3 | TRIM47   | -0.50217469  | 2.01E-29    |
| AC096669.3 | CNFN     | -0.389215242 | 2.50E-17    |
| AC096669.3 | ARMCX3   | -0.357091924 | 1.20E-14    |
| AC096669.3 | RAMP1    | -0.458366323 | 3.44E-24    |
| AC096669.3 | GABRD    | -0.084391408 | 0.077344348 |
| AC096669.3 | COL13A1  | -0.216407045 | 4.75E-06    |
| AC096669.3 | S100A5   | -0.402986532 | 1.43E-18    |
| AC096669.3 | MISP     | -0.467319556 | 3.37E-25    |
| AC096669.3 | HES6     | -0.140350813 | 0.003209861 |
| AC096669.3 | PSD3     | -0.414654133 | 1.14E-19    |
| AC096669.3 | DOK7     | -0.558231123 | 2.50E-37    |
| AC096669.3 | ZMAT3    | -0.447368697 | 5.44E-23    |
| AC096669.3 | MFAP2    | -0.402412167 | 1.61E-18    |
| AC096669.3 | TMEM79   | -0.523248746 | 3.18E-32    |
| AC096669.3 | SLC1A5   | -0.480021412 | 1.10E-26    |
| AC096669.3 | BBC3     | -0.484072042 | 3.61E-27    |
| AC096669.3 | HLA-DQB2 | -0.350462963 | 3.93E-14    |
| AC096669.3 | C1QL1    | -0.445889447 | 7.83E-23    |
| AC096669.3 | TMEM215  | -0.168327085 | 0.000396963 |
| AC096669.3 | PNP      | -0.413260705 | 1.55E-19    |
| AC096669.3 | ARNTL    | -0.540155001 | 1.29E-34    |
| AC096669.3 | CLDN2    | -0.323746833 | 3.60E-12    |
| AC096669.3 | MVP      | -0.572975813 | 1.15E-39    |
| AC096669.3 | LGALS1   | -0.491723625 | 4.17E-28    |
| AC096669.3 | BIRC7    | -0.387224459 | 3.74E-17    |
| AC096669.3 | COL8A1   | -0.49892908  | 5.21E-29    |
| AC096669.3 | PERP     | -0.471477285 | 1.12E-25    |
| AC096669.3 | GJA4     | -0.22924962  | 1.21E-06    |
| AC096669.3 | IGFL2    | -0.521348808 | 5.79E-32    |
| AC096669.3 | DAPK2    | -0.40089944  | 2.22E-18    |

|            |           |              |          |
|------------|-----------|--------------|----------|
| AC096669.3 | MAMLD1    | -0.542443384 | 5.97E-35 |
| AC096669.3 | ETV5      | -0.274776827 | 4.80E-09 |
| AC096669.3 | RUNX1     | -0.602087862 | 1.20E-44 |
| AC096669.3 | LONRF2    | -0.32458702  | 3.14E-12 |
| AC096669.3 | SPOCK1    | -0.238830413 | 4.12E-07 |
| AC096669.3 | XKRX      | -0.407604434 | 5.31E-19 |
| AC096669.3 | TGFB1     | -0.316148149 | 1.20E-11 |
| AC096669.3 | ERP27     | -0.264693305 | 1.79E-08 |
| AC096669.3 | TNFRSF10C | -0.329473593 | 1.42E-12 |
| AC096669.3 | PALM      | -0.537014362 | 3.67E-34 |
| AC096669.3 | TSC22D1   | -0.432317461 | 2.03E-21 |
| AC096669.3 | TGM2      | -0.476368114 | 3.00E-26 |
| AC096669.3 | UBE2QL1   | -0.252818456 | 7.90E-08 |
| AC096669.3 | ECE1      | -0.572585432 | 1.33E-39 |
| AC096669.3 | COL8A2    | -0.594874181 | 2.29E-43 |
| AC096669.3 | HIST3H2A  | -0.346560286 | 7.82E-14 |
| AC096669.3 | TNFRSF21  | -0.535738673 | 5.60E-34 |
| AC096669.3 | SOX4      | -0.54759423  | 1.03E-35 |
| AC096669.3 | ELF3      | -0.598346048 | 5.58E-44 |
| AC096669.3 | TPD52L1   | -0.403259884 | 1.35E-18 |
| AC096669.3 | INHBB     | -0.44492158  | 9.92E-23 |
| AC096669.3 | HPN       | -0.322544045 | 4.37E-12 |
| AC096669.3 | MMP7      | -0.406348135 | 6.96E-19 |
| AC096669.3 | RAB27A    | -0.446562401 | 6.64E-23 |
| AC096669.3 | IGF2BP2   | -0.479902255 | 1.14E-26 |
| AC096669.3 | ITGB4     | -0.55853242  | 2.24E-37 |
| AC096669.3 | PPP1R1B   | -0.477392297 | 2.27E-26 |
| AC096669.3 | NPDC1     | -0.341727759 | 1.81E-13 |
| AC096669.3 | CCL13     | -0.464291642 | 7.44E-25 |
| AC096669.3 | SPINT1    | -0.552248731 | 2.06E-36 |
| AC096669.3 | HEY2      | -0.300859025 | 1.23E-10 |
| AC096669.3 | CST2      | -0.487571474 | 1.35E-27 |
| AC096669.3 | ADM       | -0.200256444 | 2.37E-05 |
| AC096669.3 | VSTM2L    | -0.37888305  | 1.96E-16 |
| AC096669.3 | FAM84A    | -0.501276048 | 2.62E-29 |
| AC096669.3 | P4HA2     | -0.35388816  | 2.13E-14 |
| AC096669.3 | LPL       | -0.383643941 | 7.66E-17 |
| AC096669.3 | TMEM173   | -0.470170672 | 1.58E-25 |
| AC096669.3 | DHRS3     | -0.456242065 | 5.91E-24 |
| AC096669.3 | SCN1B     | -0.464262327 | 7.50E-25 |
| AC096669.3 | GLT1D1    | -0.198406106 | 2.83E-05 |
| AC096669.3 | PHYHIP    | -0.466428148 | 4.25E-25 |
| AC096669.3 | BHLHE40   | -0.498313577 | 6.23E-29 |
| AC096669.3 | BID       | -0.503484566 | 1.36E-29 |
| AC096669.3 | POSTN     | -0.303261316 | 8.62E-11 |
| AC096669.3 | ITGA3     | -0.587889167 | 3.72E-42 |
| AC096669.3 | RSPO4     | -0.554306034 | 1.00E-36 |
| AC096669.3 | ADAMTS9   | -0.235963551 | 5.71E-07 |
| AC096669.3 | ABTB2     | -0.597052626 | 9.46E-44 |
| AC096669.3 | KCNQ3     | -0.606695268 | 1.74E-45 |
| AC096669.3 | ANXA1     | -0.431796149 | 2.30E-21 |

|            |            |              |             |
|------------|------------|--------------|-------------|
| AC096669.3 | S100A11    | -0.552950481 | 1.61E-36    |
| AC096669.3 | CEACAM6    | -0.449175128 | 3.48E-23    |
| AC096669.3 | IER5L      | -0.462804072 | 1.10E-24    |
| AC096669.3 | KRT80      | -0.499091644 | 4.97E-29    |
| AC096669.3 | CDH6       | -0.552448177 | 1.92E-36    |
| AC096669.3 | UNC5B      | -0.424782765 | 1.16E-20    |
| AC096669.3 | PLEKHN1    | -0.617684099 | 1.55E-47    |
| AC096669.3 | SYTL1      | -0.428978511 | 4.43E-21    |
| AC096669.3 | TMEM163    | -0.535654412 | 5.76E-34    |
| AC096669.3 | C4orf48    | -0.229584536 | 1.16E-06    |
| AC096669.3 | B3GNT7     | -0.429513299 | 3.91E-21    |
| AC096669.3 | BAIAP3     | -0.475633028 | 3.66E-26    |
| AC096669.3 | PHLDA2     | -0.441622349 | 2.21E-22    |
| AC096669.3 | GAP43      | -0.544586688 | 2.89E-35    |
| AC096669.3 | S100A1     | -0.312957861 | 1.98E-11    |
| AC096669.3 | PTPRE      | -0.568826453 | 5.36E-39    |
| AC096669.3 | CCND1      | -0.414285314 | 1.23E-19    |
| AC096669.3 | ST6GALNAC5 | -0.571090842 | 2.31E-39    |
| AC096669.3 | KRT17      | -0.300284943 | 1.34E-10    |
| AC096669.3 | HPCAL4     | -0.351290962 | 3.39E-14    |
| AC096669.3 | GABBR2     | -0.305696942 | 5.99E-11    |
| AC096669.3 | DIRAS3     | -0.347175364 | 7.02E-14    |
| AC096669.3 | SERINC2    | -0.334637916 | 6.02E-13    |
| AC096669.3 | PTCHD4     | -0.370748738 | 9.43E-16    |
| AC096669.3 | EPS8       | -0.383990773 | 7.14E-17    |
| AC096669.3 | LY6E       | -0.529494135 | 4.31E-33    |
| AC096669.3 | UPP1       | -0.551702311 | 2.49E-36    |
| AC096669.3 | AHNAK2     | -0.517129749 | 2.17E-31    |
| AC096669.3 | PLXNC1     | -0.386337599 | 4.47E-17    |
| AC096669.3 | TNC        | -0.500246048 | 3.54E-29    |
| AC096669.3 | DUSP4      | -0.464023445 | 7.98E-25    |
| AC096669.3 | NRCAM      | -0.454849772 | 8.40E-24    |
| AC096669.3 | NRP2       | -0.487801231 | 1.27E-27    |
| AC096669.3 | CTSC       | -0.481267879 | 7.84E-27    |
| AC096669.3 | AMIGO2     | -0.441130968 | 2.49E-22    |
| AC096669.3 | NAB2       | -0.416083308 | 8.28E-20    |
| AC096669.3 | TBC1D2     | -0.557758183 | 2.96E-37    |
| AC096669.3 | PHLDA3     | -0.454570179 | 9.02E-24    |
| AC096669.3 | PTP4A3     | -0.431906511 | 2.24E-21    |
| AC096669.3 | CRABP2     | -0.262439251 | 2.39E-08    |
| AC096669.3 | GOS2       | -0.395145148 | 7.41E-18    |
| AC096669.3 | S100A6     | -0.543427139 | 4.28E-35    |
| AC096669.3 | FOXQ1      | -0.437301771 | 6.25E-22    |
| AC096669.3 | LRG1       | -0.517043644 | 2.22E-31    |
| AC096669.3 | LAMP5      | -0.467665111 | 3.07E-25    |
| AC096669.3 | ALDH3B1    | -0.561358854 | 8.15E-38    |
| AC096669.3 | CDH2       | -0.135293449 | 0.004515631 |
| AC096669.3 | SCG5       | -0.274595822 | 4.92E-09    |
| AC096669.3 | ZCCHC16    | -0.284435902 | 1.29E-09    |
| AC096669.3 | GRB7       | -0.564172804 | 2.95E-38    |
| AC096669.3 | TIAM1      | -0.480931403 | 8.60E-27    |

|            |         |              |             |
|------------|---------|--------------|-------------|
| AC096669.3 | FXYD5   | -0.409503854 | 3.52E-19    |
| AC096669.3 | CLDN9   | -0.399463881 | 3.01E-18    |
| AC096669.3 | FAM43A  | -0.421109324 | 2.69E-20    |
| AC096669.3 | CHST2   | -0.470945334 | 1.29E-25    |
| AC096669.3 | HMGA2   | -0.425693039 | 9.46E-21    |
| AC096669.3 | GALNT7  | -0.398350756 | 3.80E-18    |
| AC096669.3 | CBLN1   | -0.349059463 | 5.04E-14    |
| AC096669.3 | STRA6   | -0.552246036 | 2.06E-36    |
| AC096669.3 | MUC21   | -0.449955781 | 2.87E-23    |
| AC096669.3 | PRR36   | -0.523282366 | 3.15E-32    |
| AC096669.3 | NFE2L3  | -0.53830977  | 2.39E-34    |
| AC096669.3 | NR1D1   | -0.3047356   | 6.91E-11    |
| AC096669.3 | MUC1    | -0.492049179 | 3.80E-28    |
| AC096669.3 | NAT8L   | -0.248917481 | 1.26E-07    |
| AC096669.3 | APOC1   | -0.272672713 | 6.35E-09    |
| AC096669.3 | EVA1A   | -0.593197613 | 4.49E-43    |
| AC096669.3 | ENTPD1  | -0.200008626 | 2.43E-05    |
| AC096669.3 | COL1A1  | -0.419134579 | 4.19E-20    |
| AC096669.3 | FNDC4   | -0.458998565 | 2.92E-24    |
| AC096669.3 | FRMD3   | -0.102406675 | 0.031938204 |
| AC096669.3 | SHROOM4 | -0.487099765 | 1.55E-27    |
| AC096669.3 | NELL2   | -0.358767641 | 8.82E-15    |
| AC096669.3 | EPHB3   | -0.573640539 | 8.93E-40    |
| AC096669.3 | TMC6    | -0.530517042 | 3.09E-33    |
| AC096669.3 | NOD1    | -0.518748582 | 1.31E-31    |
| AC096669.3 | GGCT    | -0.489104866 | 8.78E-28    |
| AC096669.3 | ICAM1   | -0.483340361 | 4.42E-27    |
| AC096669.3 | PRSS23  | -0.432444987 | 1.97E-21    |
| AC096669.3 | CFI     | -0.532228789 | 1.77E-33    |
| AC096669.3 | CD55    | -0.539542478 | 1.58E-34    |
| AC096669.3 | RASD2   | -0.557717613 | 3.00E-37    |
| AC096669.3 | KLK11   | -0.41746089  | 6.09E-20    |
| AC096669.3 | ICAM5   | -0.445029672 | 9.66E-23    |
| AC096669.3 | ADORA1  | -0.424541472 | 1.23E-20    |
| AC096669.3 | ITGA2   | -0.514828458 | 4.41E-31    |
| AC096669.3 | ABCC3   | -0.410263338 | 2.98E-19    |
| AC096669.3 | MFGE8   | -0.566862064 | 1.10E-38    |
| AC096669.3 | STK32A  | -0.295475255 | 2.71E-10    |
| AC096669.3 | CYSLTR2 | -0.408747491 | 4.15E-19    |
| AC096669.3 | LAD1    | -0.509468377 | 2.27E-30    |
| AC096669.3 | MGAT3   | -0.540929238 | 9.94E-35    |
| AC096669.3 | IGFBP6  | -0.477017803 | 2.51E-26    |
| AC096669.3 | CYP2S1  | -0.579473276 | 9.78E-41    |
| AC096669.3 | KCNJ2   | -0.445255503 | 9.14E-23    |
| AC096669.3 | FAM20A  | -0.511251761 | 1.32E-30    |
| AC096669.3 | TGFA    | -0.398729647 | 3.51E-18    |
| AC096669.3 | MXRA8   | -0.623882251 | 9.98E-49    |
| AC096669.3 | C8orf4  | -0.42448856  | 1.25E-20    |
| AC096669.3 | CLDN10  | -0.550239378 | 4.14E-36    |
| AC096669.3 | PDE5A   | -0.478719621 | 1.58E-26    |
| AC096669.3 | APOE    | -0.27613692  | 4.00E-09    |

|            |           |              |             |
|------------|-----------|--------------|-------------|
| AC096669.3 | SPOCK2    | -0.546788218 | 1.36E-35    |
| AC096669.3 | TENM1     | -0.208438277 | 1.07E-05    |
| AC096669.3 | SLIT1     | -0.223383831 | 2.28E-06    |
| AC096669.3 | CXCL14    | -0.415321838 | 9.81E-20    |
| AC096669.3 | ECM1      | -0.187518132 | 7.72E-05    |
| AC096669.3 | DUSP5     | -0.555193045 | 7.33E-37    |
| AC096669.3 | SEZ6L2    | -0.39994363  | 2.72E-18    |
| AC096669.3 | THRSP     | -0.048398892 | 0.311647469 |
| AC096669.3 | C19orf33  | -0.525768634 | 1.43E-32    |
| AC096669.3 | MPZL2     | -0.44811513  | 4.52E-23    |
| AC096669.3 | CTSH      | -0.473373726 | 6.72E-26    |
| AC096669.3 | CYP1B1    | -0.479080922 | 1.43E-26    |
| AC096669.3 | ALOX5     | -0.470600488 | 1.41E-25    |
| AC096669.3 | SYTL5     | -0.526015478 | 1.32E-32    |
| AC096669.3 | TNFRSF12A | -0.499210517 | 4.80E-29    |
| AC096669.3 | DUSP6     | -0.449952418 | 2.87E-23    |
| AC096669.3 | ALOX15B   | -0.525052273 | 1.79E-32    |
| AC096669.3 | SDC4      | -0.604200488 | 4.97E-45    |
| AC096669.3 | MDK       | -0.515583686 | 3.50E-31    |
| AC096669.3 | KRT19     | -0.578749964 | 1.29E-40    |
| AC096669.3 | MET       | -0.52340053  | 3.03E-32    |
| AC096669.3 | TESC      | -0.280307132 | 2.28E-09    |
| AC096669.3 | CXCL17    | -0.469505466 | 1.89E-25    |
| AC096669.3 | NPC2      | -0.40209257  | 1.73E-18    |
| AC096669.3 | COMP      | -0.506567045 | 5.43E-30    |
| AC096669.3 | TUSC3     | -0.501459748 | 2.48E-29    |
| AC096669.3 | TMPRSS4   | -0.591643181 | 8.38E-43    |
| AC096669.3 | LGALS3    | -0.498990644 | 5.11E-29    |
| AC096669.3 | CRLF1     | -0.493080881 | 2.83E-28    |
| AC096669.3 | CTXN1     | -0.56974992  | 3.81E-39    |
| AC096669.3 | PCSK1N    | -0.351714112 | 3.15E-14    |
| AC096669.3 | NMU       | -0.342540913 | 1.57E-13    |
| AC096669.3 | GALE      | -0.478746006 | 1.57E-26    |
| AC096669.3 | PCSK2     | -0.111202308 | 0.019777813 |
| AC096669.3 | GJB3      | -0.544541399 | 2.93E-35    |
| AC096669.3 | SLPI      | -0.513611354 | 6.41E-31    |
| AC096669.3 | AGR2      | -0.230307848 | 1.07E-06    |
| AC096669.3 | MRC2      | -0.571581534 | 1.93E-39    |
| AC096669.3 | GOLT1A    | -0.438009763 | 5.28E-22    |
| AC096669.3 | SLC27A6   | -0.532386904 | 1.68E-33    |
| AC096669.3 | KCNN4     | -0.613344939 | 1.03E-46    |
| AC096669.3 | ETV4      | -0.387596776 | 3.47E-17    |
| AC096669.3 | SYT12     | -0.601412781 | 1.58E-44    |
| AC096669.3 | PVRL4     | -0.592904543 | 5.06E-43    |
| AC096669.3 | PLCD3     | -0.544380962 | 3.09E-35    |
| AC096669.3 | PLAU      | -0.520265139 | 8.14E-32    |
| AC096669.3 | LRRK2     | -0.198265103 | 2.87E-05    |
| AC096669.3 | SFN       | -0.535200622 | 6.69E-34    |
| AC096669.3 | LPAR5     | -0.482402425 | 5.73E-27    |
| AC096669.3 | NGEF      | -0.557173037 | 3.64E-37    |
| AC096669.3 | DTX4      | -0.453670543 | 1.13E-23    |

|              |          |              |          |
|--------------|----------|--------------|----------|
| AC096669.3   | CST6     | -0.554957993 | 7.96E-37 |
| AC096669.3   | QPCT     | -0.432836503 | 1.80E-21 |
| AC096669.3   | TIMP1    | -0.559210622 | 1.76E-37 |
| AC096669.3   | CAMK2N1  | -0.570385992 | 3.01E-39 |
| AC096669.3   | KLHDC8A  | -0.269603568 | 9.51E-09 |
| AC096669.3   | PDLIM4   | -0.597471946 | 7.97E-44 |
| AC096669.3   | SCEL     | -0.4537392   | 1.11E-23 |
| AC096669.3   | LCN2     | -0.517291462 | 2.06E-31 |
| AC096669.3   | PROS1    | -0.517820576 | 1.75E-31 |
| AC096669.3   | GABRB2   | -0.509342128 | 2.35E-30 |
| AC096669.3   | TMPRSS6  | -0.586218841 | 7.17E-42 |
| AC096669.3   | KLK7     | -0.493020295 | 2.88E-28 |
| AC096669.3   | PDZK1IP1 | -0.448282659 | 4.34E-23 |
| AC096669.3   | CDH3     | -0.521648779 | 5.27E-32 |
| AC096669.3   | LRP4     | -0.34809571  | 5.97E-14 |
| AC096669.3   | IGSF1    | -0.265304978 | 1.66E-08 |
| AC096669.3   | B3GNT3   | -0.555645841 | 6.25E-37 |
| AC096669.3   | CLDN1    | -0.515857322 | 3.21E-31 |
| AC096669.3   | GDF15    | -0.444615885 | 1.07E-22 |
| AC096669.3   | ARHGAP36 | -0.24507727  | 1.99E-07 |
| AC096669.3   | LAMB3    | -0.559116857 | 1.82E-37 |
| AC096669.3   | KLK10    | -0.533231836 | 1.28E-33 |
| AC096669.3   | DPP4     | -0.416030964 | 8.38E-20 |
| AC096669.3   | METTL7B  | -0.451453797 | 1.97E-23 |
| AC096669.3   | LIPH     | -0.53392323  | 1.02E-33 |
| AC096669.3   | CLDN16   | -0.42124451  | 2.60E-20 |
| AC096669.3   | CHI3L1   | -0.430762462 | 2.92E-21 |
| AC096669.3   | SLC22A31 | -0.528774274 | 5.44E-33 |
| AC096669.3   | TACSTD2  | -0.575442364 | 4.53E-40 |
| AC096669.3   | SFTPB    | -0.508234676 | 3.29E-30 |
| AC096669.3   | RXRG     | -0.363949411 | 3.39E-15 |
| AC096669.3   | DCSTAMP  | -0.508538023 | 3.00E-30 |
| AC096669.3   | CITED1   | -0.335898427 | 4.87E-13 |
| AC096669.3   | SERPINA1 | -0.577985515 | 1.73E-40 |
| AC096669.3   | PRR15    | -0.439151542 | 4.02E-22 |
| AC096669.3   | SLC34A2  | -0.483981965 | 3.70E-27 |
| AC096669.3   | FN1      | -0.583940104 | 1.74E-41 |
| AC096669.3   | ZCCHC12  | -0.30164844  | 1.10E-10 |
| RP4-555D20.2 | TFF3     | 0.664931053  | 0        |
| RP4-555D20.2 | CCL21    | 0.407546589  | 5.38E-19 |
| RP4-555D20.2 | TPO      | 0.590555775  | 0        |
| RP4-555D20.2 | MT1G     | 0.511328532  | 0        |
| RP4-555D20.2 | DIO1     | 0.605216912  | 0        |
| RP4-555D20.2 | DPT      | 0.311914004  | 2.32E-11 |
| RP4-555D20.2 | CDH16    | 0.617539012  | 0        |
| RP4-555D20.2 | CRABP1   | 0.45641505   | 5.65E-24 |
| RP4-555D20.2 | SLC26A7  | 0.610611261  | 0        |
| RP4-555D20.2 | MT1H     | 0.451753171  | 1.83E-23 |
| RP4-555D20.2 | SLC26A4  | 0.533811561  | 0        |
| RP4-555D20.2 | SLC5A8   | 0.541034384  | 9.59E-35 |
| RP4-555D20.2 | PKHD1L1  | 0.689099423  | 4.19E-63 |



|              |           |             |             |
|--------------|-----------|-------------|-------------|
| RP4-555D20.2 | TFCP2L1   | 0.587417486 | 0           |
| RP4-555D20.2 | WSCD2     | 0.628688284 | 1.14E-49    |
| RP4-555D20.2 | IPCEF1    | 0.554660484 | 0           |
| RP4-555D20.2 | SLC5A5    | 0.5236513   | 2.80E-32    |
| RP4-555D20.2 | MT1F      | 0.583119254 | 0           |
| RP4-555D20.2 | FOSB      | 0.469763444 | 0           |
| RP4-555D20.2 | SEMA3D    | 0.654894043 | 4.05E-55    |
| RP4-555D20.2 | BMP8A     | 0.601569428 | 0           |
| RP4-555D20.2 | MATN2     | 0.589167331 | 0           |
| RP4-555D20.2 | PLA2R1    | 0.643576622 | 0           |
| RP4-555D20.2 | COL23A1   | 0.533086631 | 0           |
| RP4-555D20.2 | HGD       | 0.525782303 | 0           |
| RP4-555D20.2 | TCEAL2    | 0.462893279 | 0           |
| RP4-555D20.2 | CHRDL1    | 0.381111279 | 1.26E-16    |
| RP4-555D20.2 | TNFRSF11B | 0.530219252 | 0           |
| RP4-555D20.2 | FAM167A   | 0.492289024 | 0           |
| RP4-555D20.2 | KIT       | 0.599044018 | 0           |
| RP4-555D20.2 | SLC4A4    | 0.603831305 | 0           |
| RP4-555D20.2 | SMOC2     | 0.43631371  | 0           |
| RP4-555D20.2 | FHL1      | 0.633066207 | 0           |
| RP4-555D20.2 | OTOS      | 0.468156997 | 0           |
| RP4-555D20.2 | IGFBPL1   | 0.474150959 | 5.45E-26    |
| RP4-555D20.2 | HBB       | 0.297713018 | 2.40E-10    |
| RP4-555D20.2 | BEX1      | 0.447479412 | 0           |
| RP4-555D20.2 | FABP4     | 0.418194075 | 5.17E-20    |
| RP4-555D20.2 | LMOD1     | 0.579894161 | 0           |
| RP4-555D20.2 | SOD3      | 0.536340801 | 0           |
| RP4-555D20.2 | TMEM171   | 0.588352193 | 0           |
| RP4-555D20.2 | PI16      | 0.383814398 | 0           |
| RP4-555D20.2 | ZMAT4     | 0.591724485 | 8.11E-43    |
| RP4-555D20.2 | MFAP4     | 0.289480224 | 7.66E-10    |
| RP4-555D20.2 | CWH43     | 0.566564115 | 1.23E-38    |
| RP4-555D20.2 | SPX       | 0.573301429 | 0           |
| RP4-555D20.2 | APOD      | 0.29972824  | 1.80E-10    |
| RP4-555D20.2 | DPP6      | 0.603835702 | 0           |
| RP4-555D20.2 | MMRN1     | 0.423784669 | 0           |
| RP4-555D20.2 | WDR72     | 0.503872154 | 0           |
| RP4-555D20.2 | MPPED2    | 0.63149607  | 0           |
| RP4-555D20.2 | PAPSS2    | 0.435935856 | 0           |
| RP4-555D20.2 | DCN       | 0.184332529 | 0.000105275 |
| RP4-555D20.2 | SORBS2    | 0.606164951 | 0           |
| RP4-555D20.2 | EGR2      | 0.421938516 | 0           |
| RP4-555D20.2 | EDN3      | 0.424759915 | 1.17E-20    |
| RP4-555D20.2 | DIO2      | 0.405205139 | 0           |
| RP4-555D20.2 | ITPR1     | 0.615026368 | 0           |
| RP4-555D20.2 | CFD       | 0.305655188 | 7.56E-11    |
| RP4-555D20.2 | CPXM1     | 0.424835965 | 0           |
| RP4-555D20.2 | ELMO1     | 0.57016768  | 0           |
| RP4-555D20.2 | GPC3      | 0.497768281 | 7.31E-29    |
| RP4-555D20.2 | MYOC      | 0.339859723 | 2.49E-13    |
| RP4-555D20.2 | DEPTOR    | 0.639898927 | 0           |

|              |            |             |          |
|--------------|------------|-------------|----------|
| RP4-555D20.2 | DGKI       | 0.670118888 | 0        |
| RP4-555D20.2 | CARTPT     | 0.469290542 | 2.00E-25 |
| RP4-555D20.2 | IYD        | 0.444044684 | 0        |
| RP4-555D20.2 | LYVE1      | 0.450252612 | 0        |
| RP4-555D20.2 | CLCNKB     | 0.588074901 | 0        |
| RP4-555D20.2 | NCAM1      | 0.357966424 | 1.31E-14 |
| RP4-555D20.2 | HBA2       | 0.327715543 | 2.52E-12 |
| RP4-555D20.2 | GLT8D2     | 0.458333641 | 0        |
| RP4-555D20.2 | OGDHL      | 0.445621913 | 0        |
| RP4-555D20.2 | LIFR       | 0.471667608 | 0        |
| RP4-555D20.2 | CSGALNACT1 | 0.571526054 | 0        |
| RP4-555D20.2 | RAP1GAP    | 0.490568682 | 0        |
| RP4-555D20.2 | COL9A3     | 0.527653134 | 0        |
| RP4-555D20.2 | FBLN1      | 0.218811575 | 3.91E-06 |
| RP4-555D20.2 | EFEMP1     | 0.565976251 | 0        |
| RP4-555D20.2 | AOX1       | 0.455230402 | 7.63E-24 |
| RP4-555D20.2 | GRIN2C     | 0.606635283 | 0        |
| RP4-555D20.2 | C11orf74   | 0.548875799 | 0        |
| RP4-555D20.2 | PPARGC1A   | 0.546911496 | 0        |
| RP4-555D20.2 | ANGPTL1    | 0.533044931 | 0        |
| RP4-555D20.2 | SCARA5     | 0.333662758 | 7.08E-13 |
| RP4-555D20.2 | LTF        | 0.45347274  | 0        |
| RP4-555D20.2 | CA4        | 0.497622277 | 7.62E-29 |
| RP4-555D20.2 | TG         | 0.486879924 | 0        |
| RP4-555D20.2 | FCGBP      | 0.591637566 | 0        |
| RP4-555D20.2 | PBX4       | 0.762433727 | 0        |
| RP4-555D20.2 | CYR61      | 0.488802526 | 0        |
| RP4-555D20.2 | FOS        | 0.498355398 | 0        |
| RP4-555D20.2 | KHDRBS2    | 0.633378958 | 0        |
| RP4-555D20.2 | MUM1L1     | 0.527236842 | 0        |
| RP4-555D20.2 | RGS16      | 0.495471708 | 0        |
| RP4-555D20.2 | MT1M       | 0.470533903 | 0        |
| RP4-555D20.2 | LRP2       | 0.606629326 | 0        |
| RP4-555D20.2 | MAFB       | 0.495505181 | 0        |
| RP4-555D20.2 | KCNK2      | 0.612370042 | 0        |
| RP4-555D20.2 | TBC1D4     | 0.560461623 | 0        |
| RP4-555D20.2 | MIOX       | 0.616442066 | 2.68E-47 |
| RP4-555D20.2 | TPPP       | 0.552614484 | 0        |
| RP4-555D20.2 | FMOD       | 0.48319925  | 0        |
| RP4-555D20.2 | CITED2     | 0.538641399 | 0        |
| RP4-555D20.2 | RGS8       | 0.547134818 | 1.21E-35 |
| RP4-555D20.2 | ABI3BP     | 0.37775781  | 1.37E-16 |
| RP4-555D20.2 | ADH1B      | 0.408132617 | 4.74E-19 |
| RP4-555D20.2 | OGN        | 0.26277959  | 2.29E-08 |
| RP4-555D20.2 | NR4A1      | 0.433752415 | 0        |
| RP4-555D20.2 | FOXJ1      | 0.586277914 | 7.00E-42 |
| RP4-555D20.2 | ALDH1A1    | 0.55433355  | 0        |
| RP4-555D20.2 | OCA2       | 0.654380674 | 5.25E-55 |
| RP4-555D20.2 | TMEM139    | 0.512670595 | 0        |
| RP4-555D20.2 | ARHGAP24   | 0.487289407 | 0        |
| RP4-555D20.2 | SLC25A15   | 0.499401873 | 0        |

|              |          |             |             |
|--------------|----------|-------------|-------------|
| RP4-555D20.2 | DES      | 0.314257905 | 1.62E-11    |
| RP4-555D20.2 | GDF10    | 0.425819315 | 9.18E-21    |
| RP4-555D20.2 | KIAA1324 | 0.488597571 | 0           |
| RP4-555D20.2 | JUN      | 0.475221337 | 0           |
| RP4-555D20.2 | C7       | 0.172604725 | 0.000285195 |
| RP4-555D20.2 | LGI3     | 0.465710306 | 0           |
| RP4-555D20.2 | CDON     | 0.598492555 | 0           |
| RP4-555D20.2 | BCL2     | 0.599278049 | 0           |
| RP4-555D20.2 | HLF      | 0.502923972 | 0           |
| RP4-555D20.2 | EGR1     | 0.469067307 | 0           |
| RP4-555D20.2 | IP6K3    | 0.533564055 | 0           |
| RP4-555D20.2 | SCUBE3   | 0.526051226 | 0           |
| RP4-555D20.2 | PKNOX2   | 0.616857343 | 0           |
| RP4-555D20.2 | SMAD9    | 0.655781565 | 0           |
| RP4-555D20.2 | IQGAP2   | 0.569368002 | 0           |
| RP4-555D20.2 | GNA14    | 0.62708224  | 0           |
| RP4-555D20.2 | LAYN     | 0.545998633 | 0           |
| RP4-555D20.2 | AVPR1A   | 0.475118221 | 0           |
| RP4-555D20.2 | PDLIM3   | 0.457024909 | 0           |
| RP4-555D20.2 | GPM6A    | 0.494342401 | 0           |
| RP4-555D20.2 | SDPR     | 0.428005458 | 0           |
| RP4-555D20.2 | CRYAB    | 0.262720947 | 2.60E-08    |
| RP4-555D20.2 | FOXA2    | 0.584018384 | 1.69E-41    |
| RP4-555D20.2 | C8orf88  | 0.500258853 | 0           |
| RP4-555D20.2 | ISM1     | 0.515991144 | 0           |
| RP4-555D20.2 | BMP2     | 0.485301134 | 0           |
| RP4-555D20.2 | ID4      | 0.669932514 | 0           |
| RP4-555D20.2 | NUPR1    | 0.243553077 | 2.61E-07    |
| RP4-555D20.2 | SERTM1   | 0.45940616  | 2.63E-24    |
| RP4-555D20.2 | IRS1     | 0.539503769 | 0           |
| RP4-555D20.2 | FIBIN    | 0.261223572 | 3.14E-08    |
| RP4-555D20.2 | PODN     | 0.259144949 | 4.06E-08    |
| RP4-555D20.2 | TDRD9    | 0.474162806 | 0           |
| RP4-555D20.2 | EPHA3    | 0.367800702 | 1.78E-15    |
| RP4-555D20.2 | AIF1L    | 0.567193923 | 0           |
| RP4-555D20.2 | EBF4     | 0.649936315 | 0           |
| RP4-555D20.2 | ADM2     | 0.510275249 | 0           |
| RP4-555D20.2 | GSTM3    | 0.494495726 | 0           |
| RP4-555D20.2 | HSD17B6  | 0.552476902 | 0           |
| RP4-555D20.2 | AGR3     | 0.561705758 | 7.20E-38    |
| RP4-555D20.2 | EPHB1    | 0.387988097 | 0           |
| RP4-555D20.2 | TMOD1    | 0.357396948 | 1.46E-14    |
| RP4-555D20.2 | WASF3    | 0.577789156 | 0           |
| RP4-555D20.2 | SELV     | 0.593354983 | 4.22E-43    |
| RP4-555D20.2 | ENPP1    | 0.247554302 | 1.64E-07    |
| RP4-555D20.2 | SYNE1    | 0.622087255 | 2.22E-48    |
| RP4-555D20.2 | PLCH1    | 0.536071168 | 0           |
| RP4-555D20.2 | CCDC146  | 0.758949639 | 0           |
| RP4-555D20.2 | SLC16A2  | 0.506731307 | 0           |
| RP4-555D20.2 | IER2     | 0.50816372  | 0           |
| RP4-555D20.2 | KCNAB1   | 0.505059047 | 0           |

|              |          |             |             |
|--------------|----------|-------------|-------------|
| RP4-555D20.2 | SYNDIG1  | 0.493177776 | 0           |
| RP4-555D20.2 | C16orf89 | 0.441868619 | 0           |
| RP4-555D20.2 | CTGF     | 0.455705399 | 0           |
| RP4-555D20.2 | NR4A3    | 0.224959505 | 2.05E-06    |
| RP4-555D20.2 | KIAA1456 | 0.647845352 | 0           |
| RP4-555D20.2 | AQP4     | 0.36423903  | 3.78E-15    |
| RP4-555D20.2 | RNF150   | 0.563564027 | 0           |
| RP4-555D20.2 | C1S      | 0.117350653 | 0.013923722 |
| RP4-555D20.2 | PFKFB2   | 0.407398083 | 0           |
| RP4-555D20.2 | PROX1    | 0.511085707 | 0           |
| RP4-555D20.2 | TCF7L1   | 0.635667358 | 0           |
| RP4-555D20.2 | HSPB6    | 0.376761263 | 1.88E-16    |
| RP4-555D20.2 | FHDC1    | 0.404480209 | 0           |
| RP4-555D20.2 | PRR15L   | 0.303659965 | 1.01E-10    |
| RP4-555D20.2 | SLC1A1   | 0.335407087 | 7.17E-13    |
| RP4-555D20.2 | BTBD11   | 0.555006283 | 0           |
| RP4-555D20.2 | TRIM58   | 0.480072167 | 0           |
| RP4-555D20.2 | LRIG1    | 0.52559295  | 0           |
| RP4-555D20.2 | ROR2     | 0.507374822 | 0           |
| RP4-555D20.2 | GPR125   | 0.673778144 | 0           |
| RP4-555D20.2 | FLRT1    | 0.660254399 | 0           |
| RP4-555D20.2 | PGF      | 0.560789976 | 0           |
| RP4-555D20.2 | DUSP1    | 0.459319692 | 0           |
| RP4-555D20.2 | PLA2G7   | 0.521208906 | 0           |
| RP4-555D20.2 | PLSCR4   | 0.507071574 | 0           |
| RP4-555D20.2 | FAM46B   | 0.427180959 | 0           |
| RP4-555D20.2 | GLDC     | 0.542179242 | 0           |
| RP4-555D20.2 | ZBTB16   | 0.398834382 | 0           |
| RP4-555D20.2 | OMD      | 0.20802927  | 1.11E-05    |
| RP4-555D20.2 | HSD11B2  | 0.499093944 | 0           |
| RP4-555D20.2 | FGL2     | 0.202978012 | 1.90E-05    |
| RP4-555D20.2 | CLCNKA   | 0.623149757 | 1.39E-48    |
| RP4-555D20.2 | GATM     | 0.33867005  | 4.15E-13    |
| RP4-555D20.2 | TNS3     | 0.523730629 | 0           |
| RP4-555D20.2 | TOB1     | 0.516479347 | 0           |
| RP4-555D20.2 | MARC2    | 0.587143173 | 0           |
| RP4-555D20.2 | LRRC2    | 0.555009546 | 0           |
| RP4-555D20.2 | SORD     | 0.429497868 | 0           |
| RP4-555D20.2 | RIMS4    | 0.450945912 | 0           |
| RP4-555D20.2 | SLC29A4  | 0.620904807 | 0           |
| RP4-555D20.2 | SLC39A14 | 0.398243773 | 0           |
| RP4-555D20.2 | FAXDC2   | 0.595358664 | 0           |
| RP4-555D20.2 | HSPB8    | 0.393465705 | 0           |
| RP4-555D20.2 | CCL19    | 0.035306837 | 0.460586571 |
| RP4-555D20.2 | KCNIP3   | 0.544814293 | 0           |
| RP4-555D20.2 | CGNL1    | 0.458695325 | 0           |
| RP4-555D20.2 | ATF3     | 0.303813149 | 9.91E-11    |
| RP4-555D20.2 | SGCD     | 0.464121872 | 0           |
| RP4-555D20.2 | STARD13  | 0.649768096 | 0           |
| RP4-555D20.2 | LDHD     | 0.4348908   | 0           |
| RP4-555D20.2 | RCAN1    | 0.492678084 | 0           |

|              |          |             |             |
|--------------|----------|-------------|-------------|
| RP4-555D20.2 | ID3      | 0.576104557 | 0           |
| RP4-555D20.2 | SYTL3    | 0.472628554 | 0           |
| RP4-555D20.2 | MT1E     | 0.377704763 | 1.39E-16    |
| RP4-555D20.2 | CAMK1D   | 0.400370195 | 0           |
| RP4-555D20.2 | PRKCQ    | 0.49739814  | 0           |
| RP4-555D20.2 | NUAK2    | 0.492756803 | 0           |
| RP4-555D20.2 | LIPG     | 0.546198481 | 0           |
| RP4-555D20.2 | SLC25A25 | 0.383305628 | 1.67E-18    |
| RP4-555D20.2 | PRKX     | 0.412931149 | 0           |
| RP4-555D20.2 | SRPX     | 0.280114718 | 2.74E-09    |
| RP4-555D20.2 | FAM189A1 | 0.465419682 | 0           |
| RP4-555D20.2 | PLEKHH1  | 0.750793721 | 0           |
| RP4-555D20.2 | WNT11    | 0.52957602  | 0           |
| RP4-555D20.2 | SNAI1    | 0.5589512   | 0           |
| RP4-555D20.2 | FDCSP    | 0.058247711 | 0.223231645 |
| RP4-555D20.2 | MT1X     | 0.316449845 | 1.49E-11    |
| RP4-555D20.2 | ACACB    | 0.655101456 | 0           |
| RP4-555D20.2 | ARC      | 0.266606859 | 1.60E-08    |
| RP4-555D20.2 | KLK4     | 0.289764173 | 6.13E-10    |
| RP4-555D20.2 | ZFPM2    | 0.477334285 | 0           |
| RP4-555D20.2 | AKAP12   | 0.397501681 | 0           |
| RP4-555D20.2 | GJB6     | 0.450016659 | 2.82E-23    |
| RP4-555D20.2 | ERO1LB   | 0.612556132 | 0           |
| RP4-555D20.2 | DNALI1   | 0.626475319 | 0           |
| RP4-555D20.2 | HKDC1    | 0.423408658 | 0           |
| RP4-555D20.2 | ZFP36L2  | 0.639132581 | 0           |
| RP4-555D20.2 | CAPSL    | 0.489227084 | 8.48E-28    |
| RP4-555D20.2 | CYP7B1   | 0.447715287 | 0           |
| RP4-555D20.2 | CPQ      | 0.605328821 | 0           |
| RP4-555D20.2 | RPS6KA6  | 0.648300672 | 1.07E-53    |
| RP4-555D20.2 | TLE1     | 0.510545733 | 0           |
| RP4-555D20.2 | TP53INP2 | 0.573064987 | 0           |
| RP4-555D20.2 | KATNAL2  | 0.67503553  | 0           |
| RP4-555D20.2 | SGPP2    | 0.239296261 | 4.24E-07    |
| RP4-555D20.2 | CTH      | 0.543105013 | 0           |
| RP4-555D20.2 | KIF12    | 0.687958879 | 0           |
| RP4-555D20.2 | TMEM220  | 0.515765197 | 0           |
| RP4-555D20.2 | CENPJ    | 0.741839542 | 0           |
| RP4-555D20.2 | FAM155B  | 0.298853247 | 2.04E-10    |
| RP4-555D20.2 | WFS1     | 0.586465334 | 0           |
| RP4-555D20.2 | SELENBP1 | 0.408814469 | 0           |
| RP4-555D20.2 | SNTA1    | 0.376096897 | 2.29E-16    |
| RP4-555D20.2 | FRAS1    | 0.512931149 | 0           |
| RP4-555D20.2 | FBLN7    | 0.523216895 | 0           |
| RP4-555D20.2 | AGPAT9   | 0.510023488 | 0           |
| RP4-555D20.2 | GPR83    | 0.527078552 | 0           |
| RP4-555D20.2 | PRTG     | 0.607359929 | 0           |
| RP4-555D20.2 | EGR3     | 0.249700014 | 1.27E-07    |
| RP4-555D20.2 | GRAMD2   | 0.67651475  | 0           |
| RP4-555D20.2 | HYOU1    | 0.470720135 | 0           |
| RP4-555D20.2 | FBLN5    | 0.409234165 | 0           |

|              |          |             |             |
|--------------|----------|-------------|-------------|
| RP4-555D20.2 | ITM2A    | 0.510355813 | 0           |
| RP4-555D20.2 | SRF      | 0.546523997 | 0           |
| RP4-555D20.2 | FGFR2    | 0.557179654 | 0           |
| RP4-555D20.2 | MT1A     | 0.211366481 | 7.95E-06    |
| RP4-555D20.2 | MAMDC2   | 0.41086132  | 0           |
| RP4-555D20.2 | FHL2     | 0.357083063 | 1.55E-14    |
| RP4-555D20.2 | FTCDNL1  | 0.376872747 | 1.81E-16    |
| RP4-555D20.2 | PKIA     | 0.407368439 | 0           |
| RP4-555D20.2 | DNAJB4   | 0.530222089 | 0           |
| RP4-555D20.2 | SLC25A33 | 0.4556515   | 0           |
| RP4-555D20.2 | EYA2     | 0.356748043 | 1.66E-14    |
| RP4-555D20.2 | LPAR1    | 0.290339331 | 6.79E-10    |
| RP4-555D20.2 | STX11    | 0.258063299 | 4.64E-08    |
| RP4-555D20.2 | ARHGEF28 | 0.441439278 | 0           |
| RP4-555D20.2 | OR2W3    | 0.509705631 | 0           |
| RP4-555D20.2 | ALDH1B1  | 0.268249697 | 1.13E-08    |
| RP4-555D20.2 | CXCL12   | 0.192838218 | 4.92E-05    |
| RP4-555D20.2 | OLFM2    | 0.538854722 | 0           |
| RP4-555D20.2 | TUB      | 0.545565888 | 0           |
| RP4-555D20.2 | HTRA3    | 0.396753348 | 0           |
| RP4-555D20.2 | CKB      | 0.406974557 | 0           |
| RP4-555D20.2 | RGS2     | 0.140335076 | 0.003237363 |
| RP4-555D20.2 | SHANK2   | 0.671241671 | 0           |
| RP4-555D20.2 | CNTFR    | 0.419708175 | 3.68E-20    |
| RP4-555D20.2 | CYTH3    | 0.522669545 | 0           |
| RP4-555D20.2 | PLAC9    | 0.384444013 | 0           |
| RP4-555D20.2 | WVOX     | 0.518587614 | 0           |
| RP4-555D20.2 | NPR3     | 0.575747978 | 0           |
| RP4-555D20.2 | SDC2     | 0.582099587 | 0           |
| RP4-555D20.2 | KLF15    | 0.487052256 | 0           |
| RP4-555D20.2 | TMEM164  | 0.552812914 | 0           |
| RP4-555D20.2 | LONRF3   | 0.372750534 | 5.63E-16    |
| RP4-555D20.2 | GBP1     | 0.248767435 | 1.42E-07    |
| RP4-555D20.2 | ARHGAP6  | 0.545700775 | 0           |
| RP4-555D20.2 | TMEM119  | 0.157814659 | 0.000918651 |
| RP4-555D20.2 | SH3RF1   | 0.451292278 | 0           |
| RP4-555D20.2 | CRELD2   | 0.483715679 | 0           |
| RP4-555D20.2 | PCP4     | 0.181320617 | 0.000136785 |
| RP4-555D20.2 | GCSH     | 0.522385162 | 0           |
| RP4-555D20.2 | IMPA2    | 0.535976563 | 0           |
| RP4-555D20.2 | C1R      | 0.095254839 | 0.046110217 |
| RP4-555D20.2 | SUCNR1   | 0.319190706 | 9.72E-12    |
| RP4-555D20.2 | SFRP1    | 0.364429375 | 3.64E-15    |
| RP4-555D20.2 | UGT8     | 0.372428138 | 6.09E-16    |
| RP4-555D20.2 | TLE4     | 0.36847996  | 1.53E-15    |
| RP4-555D20.2 | ANTXR1   | 0.415157709 | 0           |
| RP4-555D20.2 | GPX3     | 0.511537316 | 0           |
| RP4-555D20.2 | DPY19L2  | 0.741400415 | 0           |
| RP4-555D20.2 | FAM46C   | 0.280445482 | 2.63E-09    |
| RP4-555D20.2 | IL33     | 0.366931962 | 1.94E-15    |
| RP4-555D20.2 | PEG3     | 0.524458253 | 0           |

|              |          |             |             |
|--------------|----------|-------------|-------------|
| RP4-555D20.2 | FAHD2A   | 0.634982568 | 0           |
| RP4-555D20.2 | PTGDS    | 0.047202404 | 0.323641153 |
| RP4-555D20.2 | CHCHD10  | 0.292038682 | 5.36E-10    |
| RP4-555D20.2 | CD36     | 0.406918106 | 0           |
| RP4-555D20.2 | ANKRD37  | 0.629843951 | 0           |
| RP4-555D20.2 | TSPAN33  | 0.333022095 | 1.06E-12    |
| RP4-555D20.2 | PRDM16   | 0.659294304 | 0           |
| RP4-555D20.2 | UST      | 0.362404792 | 5.50E-15    |
| RP4-555D20.2 | NEXN     | 0.522957616 | 0           |
| RP4-555D20.2 | NUPR1L   | 0.23592445  | 5.74E-07    |
| RP4-555D20.2 | SLC24A3  | 0.437357489 | 0           |
| RP4-555D20.2 | MARC1    | 0.587575635 | 0           |
| RP4-555D20.2 | MYH11    | 0.42935674  | 0           |
| RP4-555D20.2 | APOA1    | 0.542161603 | 6.56E-35    |
| RP4-555D20.2 | TMEM178B | 0.467058326 | 0           |
| RP4-555D20.2 | CAPN6    | 0.4157306   | 8.96E-20    |
| RP4-555D20.2 | PPM1L    | 0.49521399  | 0           |
| RP4-555D20.2 | FZD8     | 0.634004459 | 0           |
| RP4-555D20.2 | RCAN2    | 0.498466882 | 0           |
| RP4-555D20.2 | COPZ2    | 0.441422825 | 0           |
| RP4-555D20.2 | GAS1     | 0.270616311 | 9.56E-09    |
| RP4-555D20.2 | DACT1    | 0.539452565 | 0           |
| RP4-555D20.2 | WBSCR17  | 0.518546907 | 0           |
| RP4-555D20.2 | NCS1     | 0.525396931 | 0           |
| RP4-555D20.2 | SPIRE2   | 0.610386733 | 0           |
| RP4-555D20.2 | C15orf52 | 0.510331558 | 0           |
| RP4-555D20.2 | SPAG5    | 0.563597642 | 0           |
| RP4-555D20.2 | ARL4D    | 0.314270234 | 2.08E-11    |
| RP4-555D20.2 | FAM189A2 | 0.595653685 | 0           |
| RP4-555D20.2 | MAP1LC3A | 0.523324123 | 0           |
| RP4-555D20.2 | KLF6     | 0.255690648 | 6.19E-08    |
| RP4-555D20.2 | ADD3     | 0.352103728 | 3.93E-14    |
| RP4-555D20.2 | TSPAN7   | 0.376280151 | 2.17E-16    |
| RP4-555D20.2 | KLF9     | 0.364629649 | 3.49E-15    |
| RP4-555D20.2 | KCNQ1    | 0.397801241 | 0           |
| RP4-555D20.2 | MAN1A1   | 0.231908107 | 9.67E-07    |
| RP4-555D20.2 | MLF1     | 0.390564852 | 0           |
| RP4-555D20.2 | RARB     | 0.555434064 | 0           |
| RP4-555D20.2 | CDC42EP2 | 0.410254825 | 0           |
| RP4-555D20.2 | FAM3B    | 0.284445431 | 1.53E-09    |
| RP4-555D20.2 | GADD45B  | 0.313042775 | 2.50E-11    |
| RP4-555D20.2 | TMEM47   | 0.450548768 | 0           |
| RP4-555D20.2 | SDF2L1   | 0.352552785 | 3.62E-14    |
| RP4-555D20.2 | CCDC85A  | 0.47633022  | 0           |
| RP4-555D20.2 | CRYBG3   | 0.293820156 | 4.17E-10    |
| RP4-555D20.2 | FBLN2    | 0.16143959  | 0.000695834 |
| RP4-555D20.2 | PEBP4    | 0.047974708 | 0.315780804 |
| RP4-555D20.2 | CDADC1   | 0.546192666 | 0           |
| RP4-555D20.2 | FAM63A   | 0.425577915 | 0           |
| RP4-555D20.2 | GLUL     | 0.463142203 | 0           |
| RP4-555D20.2 | FREM2    | 0.406075452 | 0           |

|              |          |              |             |
|--------------|----------|--------------|-------------|
| RP4-555D20.2 | ACKR3    | 0.573055768  | 0           |
| RP4-555D20.2 | DENND6A  | 0.596506551  | 0           |
| RP4-555D20.2 | CLDN8    | 0.366821316  | 2.20E-15    |
| RP4-555D20.2 | UTS2R    | 0.417200619  | 6.46E-20    |
| RP4-555D20.2 | SCNN1B   | 0.456318419  | 0           |
| RP4-555D20.2 | TTC30A   | 0.528902578  | 0           |
| RP4-555D20.2 | CORO2B   | 0.503639257  | 0           |
| RP4-555D20.2 | TC2N     | 0.403452883  | 0           |
| RP4-555D20.2 | ALDH2    | 0.345984307  | 1.18E-13    |
| RP4-555D20.2 | GPR183   | 0.035149227  | 0.462441829 |
| RP4-555D20.2 | C4orf47  | 0.644795286  | 0           |
| RP4-555D20.2 | SLC25A42 | 0.517137046  | 0           |
| RP4-555D20.2 | LGMN     | 0.414469373  | 0           |
| RP4-555D20.2 | ACSF2    | 0.514556745  | 0           |
| RP4-555D20.2 | KIAA1467 | 0.45287518   | 0           |
| RP4-555D20.2 | PRKG1    | 0.496173802  | 0           |
| RP4-555D20.2 | GNAI1    | 0.495031303  | 0           |
| RP4-555D20.2 | ABCC4    | 0.327893548  | 2.45E-12    |
| RP4-555D20.2 | PRPS1    | 0.381879314  | 1.99E-17    |
| RP4-555D20.2 | TSPAN5   | 0.523758854  | 0           |
| RP4-555D20.2 | CR2      | 0.148452862  | 0.001815502 |
| RP4-555D20.2 | CCDC170  | 0.546812494  | 0           |
| RP4-555D20.2 | RRAD     | 0.139546178  | 0.003416158 |
| RP4-555D20.2 | SCGB2A1  | 0.387002613  | 0           |
| RP4-555D20.2 | SESN3    | 0.376013355  | 2.35E-16    |
| RP4-555D20.2 | SGK223   | 0.404916926  | 0           |
| RP4-555D20.2 | NDRG2    | 0.462676835  | 0           |
| RP4-555D20.2 | C3orf52  | 0.358923116  | 1.09E-14    |
| RP4-555D20.2 | FLRT3    | -0.124873694 | 0.008849932 |
| RP4-555D20.2 | MST1R    | -0.309148637 | 4.50E-11    |
| RP4-555D20.2 | SDC1     | -0.385685229 | 0           |
| RP4-555D20.2 | ST8SIA4  | -0.3747537   | 3.34E-16    |
| RP4-555D20.2 | UBTD1    | -0.377355135 | 1.56E-16    |
| RP4-555D20.2 | EPHA2    | -0.139358669 | 0.003459952 |
| RP4-555D20.2 | TMEM130  | -0.116953509 | 0.014251585 |
| RP4-555D20.2 | SPINK2   | -0.546931354 | 0           |
| RP4-555D20.2 | MMP16    | -0.252357617 | 9.25E-08    |
| RP4-555D20.2 | SIGLEC15 | -0.371579243 | 7.49E-16    |
| RP4-555D20.2 | RIN1     | -0.454418227 | 0           |
| RP4-555D20.2 | IL1RN    | -0.408813476 | 0           |
| RP4-555D20.2 | FCER1G   | -0.35807266  | 1.29E-14    |
| RP4-555D20.2 | CD276    | -0.496051538 | 0           |
| RP4-555D20.2 | CTSB     | -0.557275252 | 0           |
| RP4-555D20.2 | FAM171A2 | -0.15379315  | 0.00124189  |
| RP4-555D20.2 | ASPHD1   | -0.519696213 | 0           |
| RP4-555D20.2 | C15orf48 | -0.370716306 | 9.19E-16    |
| RP4-555D20.2 | DYSF     | -0.22962311  | 1.24E-06    |
| RP4-555D20.2 | PDZRN4   | -0.132778987 | 0.005359152 |
| RP4-555D20.2 | EFHD2    | -0.219188436 | 3.76E-06    |
| RP4-555D20.2 | ASF1B    | -0.41872931  | 0           |
| RP4-555D20.2 | AQP1     | -0.216613951 | 4.90E-06    |



|              |          |              |             |
|--------------|----------|--------------|-------------|
| RP4-555D20.2 | ARRDC2   | -0.176103138 | 0.000213221 |
| RP4-555D20.2 | PRSS1    | -0.356423841 | 1.35E-14    |
| RP4-555D20.2 | MAPK13   | -0.469421049 | 0           |
| RP4-555D20.2 | CST5     | -0.284017733 | 1.37E-09    |
| RP4-555D20.2 | AHR      | -0.258190811 | 4.56E-08    |
| RP4-555D20.2 | BAX      | -0.340181041 | 3.21E-13    |
| RP4-555D20.2 | C1orf115 | -0.259842788 | 3.72E-08    |
| RP4-555D20.2 | PLK3     | -0.2057688   | 1.45E-05    |
| RP4-555D20.2 | JAG2     | -0.105897304 | 0.026546836 |
| RP4-555D20.2 | RAD23B   | -0.507354681 | 0           |
| RP4-555D20.2 | CA12     | 0.041068516  | 0.390530989 |
| RP4-555D20.2 | ADTRP    | -0.296327411 | 2.92E-10    |
| RP4-555D20.2 | UCP2     | -0.269579198 | 1.09E-08    |
| RP4-555D20.2 | IGFBP2   | -0.136226622 | 0.004270889 |
| RP4-555D20.2 | LOXL2    | -0.249774904 | 1.26E-07    |
| RP4-555D20.2 | GPX1     | -0.42009052  | 0           |
| RP4-555D20.2 | P3H3     | -0.390179481 | 0           |
| RP4-555D20.2 | C2orf81  | -0.316544167 | 1.46E-11    |
| RP4-555D20.2 | CDT1     | -0.46426683  | 0           |
| RP4-555D20.2 | SNX25    | -0.173425821 | 0.000266507 |
| RP4-555D20.2 | MTHFD1L  | -0.339880204 | 3.38E-13    |
| RP4-555D20.2 | CDC42BPG | -0.355830441 | 1.50E-14    |
| RP4-555D20.2 | MSN      | -0.507766292 | 0           |
| RP4-555D20.2 | SIGLEC6  | -0.340826434 | 2.11E-13    |
| RP4-555D20.2 | F2R      | 0.029572758  | 0.536438642 |
| RP4-555D20.2 | TMEM184A | -0.257978197 | 4.68E-08    |
| RP4-555D20.2 | CKS2     | -0.206707194 | 1.32E-05    |
| RP4-555D20.2 | TAX1BP3  | -0.400261973 | 0           |
| RP4-555D20.2 | PMEP1    | -0.374225782 | 3.85E-16    |
| RP4-555D20.2 | CXCL16   | -0.46651353  | 0           |
| RP4-555D20.2 | FAXC     | -0.295356962 | 3.36E-10    |
| RP4-555D20.2 | VTCN1    | -0.335995742 | 4.79E-13    |
| RP4-555D20.2 | SH2D4A   | -0.398360788 | 0           |
| RP4-555D20.2 | RNF24    | -0.288623669 | 8.62E-10    |
| RP4-555D20.2 | LY6G6C   | -0.32425781  | 3.32E-12    |
| RP4-555D20.2 | NID1     | -0.177189611 | 0.00019459  |
| RP4-555D20.2 | STAC     | -0.425821875 | 0           |
| RP4-555D20.2 | RAB34    | -0.432541126 | 0           |
| RP4-555D20.2 | HES4     | -0.111663551 | 0.019311654 |
| RP4-555D20.2 | EPHA10   | -0.51274818  | 0           |
| RP4-555D20.2 | ENTPD2   | -0.399451799 | 0           |
| RP4-555D20.2 | DDB2     | -0.371303795 | 8.00E-16    |
| RP4-555D20.2 | NKAIN4   | -0.067068113 | 0.160616343 |
| RP4-555D20.2 | TRIM29   | -0.195963315 | 3.69E-05    |
| RP4-555D20.2 | ADCY8    | -0.525356425 | 1.63E-32    |
| RP4-555D20.2 | SFTA2    | -0.289108327 | 8.06E-10    |
| RP4-555D20.2 | NRIP1    | -0.368945895 | 1.38E-15    |
| RP4-555D20.2 | VWA1     | -0.117172505 | 0.014069961 |
| RP4-555D20.2 | APLNR    | -0.176676444 | 0.000203191 |
| RP4-555D20.2 | REN      | -0.488101913 | 1.17E-27    |
| RP4-555D20.2 | EDIL3    | -0.218645626 | 3.98E-06    |

|              |          |              |             |
|--------------|----------|--------------|-------------|
| RP4-555D20.2 | AGRN     | -0.205163013 | 1.54E-05    |
| RP4-555D20.2 | TREM1    | -0.408943398 | 0           |
| RP4-555D20.2 | SRL      | -0.288086674 | 9.29E-10    |
| RP4-555D20.2 | RASGRF1  | -0.336530721 | 5.94E-13    |
| RP4-555D20.2 | RMI2     | -0.459245653 | 0           |
| RP4-555D20.2 | SAMD1    | -0.389432283 | 0           |
| RP4-555D20.2 | MGAT4B   | -0.452263153 | 0           |
| RP4-555D20.2 | NXN      | -0.335992307 | 6.50E-13    |
| RP4-555D20.2 | SH3BGRL3 | -0.469244746 | 0           |
| RP4-555D20.2 | CA11     | -0.374333578 | 3.74E-16    |
| RP4-555D20.2 | PLD3     | -0.304925011 | 8.42E-11    |
| RP4-555D20.2 | LURAP1L  | -0.428509122 | 0           |
| RP4-555D20.2 | CARNS1   | -0.107589279 | 0.024214204 |
| RP4-555D20.2 | PDLIM7   | -0.33286267  | 1.09E-12    |
| RP4-555D20.2 | BCL2L1   | -0.441483531 | 0           |
| RP4-555D20.2 | GGT6     | -0.274043238 | 6.13E-09    |
| RP4-555D20.2 | DPYSL3   | -0.116809402 | 0.014372221 |
| RP4-555D20.2 | FYN      | -0.429352201 | 0           |
| RP4-555D20.2 | TK1      | -0.429622259 | 0           |
| RP4-555D20.2 | AK1      | -0.348419934 | 7.64E-14    |
| RP4-555D20.2 | HIGD1B   | -0.140193523 | 0.003268805 |
| RP4-555D20.2 | TMEM59L  | -0.118011755 | 0.013392662 |
| RP4-555D20.2 | MEGF9    | -0.303017727 | 1.11E-10    |
| RP4-555D20.2 | ZFP36L1  | -0.263717636 | 2.30E-08    |
| RP4-555D20.2 | ADRA1B   | -0.253812866 | 7.77E-08    |
| RP4-555D20.2 | EPHA4    | -0.250892723 | 1.10E-07    |
| RP4-555D20.2 | TCERG1L  | 0.019144041  | 0.689038756 |
| RP4-555D20.2 | NGFR     | -0.290457907 | 6.68E-10    |
| RP4-555D20.2 | EBI3     | -0.441166809 | 0           |
| RP4-555D20.2 | S100A10  | -0.314653478 | 1.96E-11    |
| RP4-555D20.2 | S100B    | -0.389448168 | 0           |
| RP4-555D20.2 | CD44     | -0.329447232 | 1.91E-12    |
| RP4-555D20.2 | BHLHE41  | -0.31453164  | 1.99E-11    |
| RP4-555D20.2 | FBXO2    | -0.400388917 | 0           |
| RP4-555D20.2 | SLC30A2  | -0.225440333 | 1.95E-06    |
| RP4-555D20.2 | FRMD5    | -0.519858475 | 0           |
| RP4-555D20.2 | SAMD11   | -0.126139732 | 0.008181171 |
| RP4-555D20.2 | SIPA1L2  | -0.244627635 | 2.30E-07    |
| RP4-555D20.2 | S100A16  | -0.470432632 | 0           |
| RP4-555D20.2 | PPL      | -0.321246919 | 7.05E-12    |
| RP4-555D20.2 | ARHGD1B  | -0.125282469 | 0.008628865 |
| RP4-555D20.2 | CDC42EP3 | -0.3481069   | 8.08E-14    |
| RP4-555D20.2 | RUNX2    | -0.438110361 | 0           |
| RP4-555D20.2 | LAMC2    | -0.404685164 | 0           |
| RP4-555D20.2 | BRINP1   | -0.508819858 | 0           |
| RP4-555D20.2 | GPRC5B   | -0.426605242 | 0           |
| RP4-555D20.2 | AQP5     | 0.003296011  | 0.945077758 |
| RP4-555D20.2 | PLAG1    | -0.190080904 | 6.31E-05    |
| RP4-555D20.2 | PTPRU    | -0.281253812 | 2.36E-09    |
| RP4-555D20.2 | ANGPTL4  | -0.369957477 | 1.10E-15    |
| RP4-555D20.2 | PALM3    | -0.216435945 | 4.99E-06    |

|              |          |              |             |
|--------------|----------|--------------|-------------|
| RP4-555D20.2 | ACP5     | -0.351211005 | 4.62E-14    |
| RP4-555D20.2 | DLG4     | -0.263302054 | 2.42E-08    |
| RP4-555D20.2 | ETNK2    | -0.435257449 | 0           |
| RP4-555D20.2 | CD109    | -0.263906989 | 2.24E-08    |
| RP4-555D20.2 | SNX22    | -0.233608166 | 8.02E-07    |
| RP4-555D20.2 | TMEM98   | -0.363266594 | 4.62E-15    |
| RP4-555D20.2 | CTHRC1   | -0.280009333 | 2.78E-09    |
| RP4-555D20.2 | S100A2   | -0.285793451 | 1.27E-09    |
| RP4-555D20.2 | C11orf80 | -0.47716252  | 0           |
| RP4-555D20.2 | SREBF1   | -0.292808432 | 4.81E-10    |
| RP4-555D20.2 | PRSS22   | -0.270146546 | 1.02E-08    |
| RP4-555D20.2 | CMTM3    | -0.404471983 | 0           |
| RP4-555D20.2 | RDH5     | -0.360674095 | 7.76E-15    |
| RP4-555D20.2 | MYH10    | -0.389303211 | 0           |
| RP4-555D20.2 | EVPL     | -0.279398299 | 3.02E-09    |
| RP4-555D20.2 | SCD      | -0.403748755 | 0           |
| RP4-555D20.2 | CD151    | -0.361993464 | 5.97E-15    |
| RP4-555D20.2 | S100A4   | -0.378652519 | 1.00E-16    |
| RP4-555D20.2 | BNIP1    | -0.250506642 | 1.15E-07    |
| RP4-555D20.2 | MAP3K6   | -0.420870625 | 0           |
| RP4-555D20.2 | MANEAL   | -0.509820803 | 0           |
| RP4-555D20.2 | CD207    | -0.375772499 | 3.59E-16    |
| RP4-555D20.2 | CD1A     | -0.391554743 | 1.55E-17    |
| RP4-555D20.2 | C3       | -0.288394886 | 8.90E-10    |
| RP4-555D20.2 | NT5E     | -0.220196189 | 3.39E-06    |
| RP4-555D20.2 | CACNG4   | -0.269973129 | 9.06E-09    |
| RP4-555D20.2 | FHOD1    | -0.206821799 | 1.31E-05    |
| RP4-555D20.2 | LEMD1    | -0.562480107 | 0           |
| RP4-555D20.2 | ATP11A   | -0.150697697 | 0.001558797 |
| RP4-555D20.2 | PPAP2C   | -0.252787525 | 8.79E-08    |
| RP4-555D20.2 | DRAM1    | -0.285391059 | 1.34E-09    |
| RP4-555D20.2 | CDA      | -0.185462687 | 9.53E-05    |
| RP4-555D20.2 | CCND2    | -0.289281794 | 7.87E-10    |
| RP4-555D20.2 | LCN6     | -0.095264913 | 0.046057098 |
| RP4-555D20.2 | CDH4     | -0.347357716 | 9.23E-14    |
| RP4-555D20.2 | MMP11    | -0.392671843 | 0           |
| RP4-555D20.2 | B3GAT1   | -0.1309873   | 0.006018195 |
| RP4-555D20.2 | SPP1     | -0.253578551 | 7.99E-08    |
| RP4-555D20.2 | HLA-DQB1 | -0.418347909 | 0           |
| RP4-555D20.2 | SDC3     | -0.40181977  | 0           |
| RP4-555D20.2 | CX3CL1   | -0.275658763 | 4.96E-09    |
| RP4-555D20.2 | SDK1     | -0.227312158 | 1.59E-06    |
| RP4-555D20.2 | DOCK9    | -0.344226236 | 1.60E-13    |
| RP4-555D20.2 | CSF2     | -0.455154018 | 7.78E-24    |
| RP4-555D20.2 | GRHL3    | -0.421375707 | 0           |
| RP4-555D20.2 | TMEM92   | -0.528086834 | 6.78E-33    |
| RP4-555D20.2 | BASP1    | -0.379988766 | 5.86E-17    |
| RP4-555D20.2 | HRH1     | -0.327095715 | 2.79E-12    |
| RP4-555D20.2 | ESM1     | 0.061130811  | 0.2010332   |
| RP4-555D20.2 | B4GALNT3 | -0.388478995 | 0           |
| RP4-555D20.2 | LMO3     | -0.114977717 | 0.015985683 |

|              |          |              |             |
|--------------|----------|--------------|-------------|
| RP4-555D20.2 | C9orf16  | -0.442573408 | 0           |
| RP4-555D20.2 | SEMA3F   | -0.16163646  | 0.000685301 |
| RP4-555D20.2 | PLA2G12B | -0.406181532 | 7.22E-19    |
| RP4-555D20.2 | KLK6     | -0.280967178 | 2.08E-09    |
| RP4-555D20.2 | ST3GAL5  | -0.335046537 | 7.61E-13    |
| RP4-555D20.2 | FAM132B  | -0.086404344 | 0.070525436 |
| RP4-555D20.2 | CDKN1A   | -0.161511502 | 0.000691969 |
| RP4-555D20.2 | E2F1     | -0.47141769  | 0           |
| RP4-555D20.2 | B3GNT8   | -0.378292111 | 1.14E-16    |
| RP4-555D20.2 | MTMR11   | -0.362804205 | 5.07E-15    |
| RP4-555D20.2 | MYO1G    | -0.238628917 | 4.57E-07    |
| RP4-555D20.2 | TMSB10   | -0.393295926 | 0           |
| RP4-555D20.2 | UNC5CL   | -0.409004672 | 0           |
| RP4-555D20.2 | ABR      | -0.440405144 | 0           |
| RP4-555D20.2 | PLP2     | -0.538352902 | 0           |
| RP4-555D20.2 | SRCIN1   | -0.436068048 | 0           |
| RP4-555D20.2 | PDE9A    | -0.438121708 | 0           |
| RP4-555D20.2 | TREM2    | -0.329050656 | 2.03E-12    |
| RP4-555D20.2 | KDEL3    | -0.342822616 | 2.04E-13    |
| RP4-555D20.2 | PC       | -0.531571385 | 0           |
| RP4-555D20.2 | C2CD4A   | -0.465267065 | 0           |
| RP4-555D20.2 | PELI1    | -0.293971071 | 4.08E-10    |
| RP4-555D20.2 | SSX1     | -0.069802166 | 0.14420775  |
| RP4-555D20.2 | MROH6    | -0.381617057 | 2.41E-17    |
| RP4-555D20.2 | ESPN     | -0.427121954 | 0           |
| RP4-555D20.2 | BMP1     | -0.273984233 | 6.17E-09    |
| RP4-555D20.2 | TM4SF4   | -0.300209565 | 1.36E-10    |
| RP4-555D20.2 | CORO2A   | -0.474131602 | 0           |
| RP4-555D20.2 | CD164L2  | -0.495261735 | 1.51E-28    |
| RP4-555D20.2 | CTSS     | -0.392389871 | 0           |
| RP4-555D20.2 | CLU      | -0.307117955 | 6.09E-11    |
| RP4-555D20.2 | TMSB4X   | -0.376823529 | 1.84E-16    |
| RP4-555D20.2 | WNT10A   | -0.289952693 | 5.96E-10    |
| RP4-555D20.2 | NAPSA    | -0.189484337 | 6.66E-05    |
| RP4-555D20.2 | PLEKHA4  | -0.360705441 | 7.71E-15    |
| RP4-555D20.2 | SFTPA1   | -0.10291878  | 0.03108618  |
| RP4-555D20.2 | C1orf116 | -0.337047575 | 5.45E-13    |
| RP4-555D20.2 | TM4SF1   | -0.231940587 | 9.64E-07    |
| RP4-555D20.2 | SEL1L3   | -0.250060848 | 1.22E-07    |
| RP4-555D20.2 | VASN     | -0.465213167 | 0           |
| RP4-555D20.2 | NPTXR    | -0.552409387 | 0           |
| RP4-555D20.2 | PDE4C    | -0.26578321  | 1.77E-08    |
| RP4-555D20.2 | CDC42EP1 | -0.409714141 | 0           |
| RP4-555D20.2 | ENDOD1   | -0.568565488 | 0           |
| RP4-555D20.2 | RYR1     | -0.365668039 | 2.81E-15    |
| RP4-555D20.2 | IL1RAP   | -0.356230196 | 1.83E-14    |
| RP4-555D20.2 | SLC35F2  | -0.419055479 | 4.27E-20    |
| RP4-555D20.2 | ISYNA1   | -0.290254654 | 6.88E-10    |
| RP4-555D20.2 | HLA-G    | -0.334333805 | 8.57E-13    |
| RP4-555D20.2 | CDKN2B   | -0.361906802 | 6.07E-15    |
| RP4-555D20.2 | ALDH1A3  | -0.230002667 | 1.19E-06    |

|              |          |              |             |
|--------------|----------|--------------|-------------|
| RP4-555D20.2 | CLIP3    | -0.295585319 | 3.25E-10    |
| RP4-555D20.2 | ULBP2    | -0.372117373 | 6.58E-16    |
| RP4-555D20.2 | ETHE1    | -0.563215107 | 0           |
| RP4-555D20.2 | XPR1     | -0.351906007 | 4.07E-14    |
| RP4-555D20.2 | SPTBN2   | -0.549857312 | 0           |
| RP4-555D20.2 | IVL      | -0.465955369 | 4.82E-25    |
| RP4-555D20.2 | MARCO    | -0.364655038 | 3.47E-15    |
| RP4-555D20.2 | PLXND1   | -0.210732107 | 8.89E-06    |
| RP4-555D20.2 | EMILIN2  | -0.38525291  | 0           |
| RP4-555D20.2 | PLAUR    | -0.390589674 | 0           |
| RP4-555D20.2 | CDC42EP5 | -0.356507913 | 1.73E-14    |
| RP4-555D20.2 | TRPC5    | -0.328777002 | 1.59E-12    |
| RP4-555D20.2 | TMEM100  | -0.289057549 | 8.12E-10    |
| RP4-555D20.2 | QSOX1    | -0.462068496 | 0           |
| RP4-555D20.2 | ARHGAP23 | -0.27344511  | 6.62E-09    |
| RP4-555D20.2 | MDFI     | -0.119715078 | 0.012105803 |
| RP4-555D20.2 | FSTL3    | -0.288428643 | 8.86E-10    |
| RP4-555D20.2 | INF2     | -0.450015886 | 0           |
| RP4-555D20.2 | TGFBR1   | -0.523904946 | 0           |
| RP4-555D20.2 | TGFBI    | -0.327600513 | 2.57E-12    |
| RP4-555D20.2 | ERBB3    | -0.446189971 | 0           |
| RP4-555D20.2 | CCL18    | -0.210526726 | 9.07E-06    |
| RP4-555D20.2 | CCL17    | -0.341218804 | 1.97E-13    |
| RP4-555D20.2 | C16orf45 | -0.320826797 | 7.53E-12    |
| RP4-555D20.2 | PRDM1    | -0.217503128 | 4.47E-06    |
| RP4-555D20.2 | TRIM47   | -0.468304082 | 0           |
| RP4-555D20.2 | CNFN     | -0.407299648 | 0           |
| RP4-555D20.2 | ARMCX3   | -0.382642681 | 9.18E-18    |
| RP4-555D20.2 | RAMP1    | -0.298719211 | 2.08E-10    |
| RP4-555D20.2 | GABRD    | -0.078496498 | 0.100467027 |
| RP4-555D20.2 | COL13A1  | -0.202054795 | 2.07E-05    |
| RP4-555D20.2 | S100A5   | -0.417405969 | 0           |
| RP4-555D20.2 | MISP     | -0.248938633 | 1.39E-07    |
| RP4-555D20.2 | HES6     | -0.183309457 | 0.00011512  |
| RP4-555D20.2 | PSD3     | -0.501376246 | 0           |
| RP4-555D20.2 | DOK7     | -0.282599988 | 1.96E-09    |
| RP4-555D20.2 | ZMAT3    | -0.393570523 | 0           |
| RP4-555D20.2 | MFAP2    | -0.260520202 | 3.42E-08    |
| RP4-555D20.2 | TMEM79   | -0.514980838 | 0           |
| RP4-555D20.2 | SLC1A5   | -0.39433389  | 0           |
| RP4-555D20.2 | BBC3     | -0.326580846 | 3.03E-12    |
| RP4-555D20.2 | HLA-DQB2 | -0.418971284 | 0           |
| RP4-555D20.2 | C1QL1    | -0.292933249 | 4.73E-10    |
| RP4-555D20.2 | TMEM215  | -0.193255586 | 4.58E-05    |
| RP4-555D20.2 | PNP      | -0.357349575 | 1.48E-14    |
| RP4-555D20.2 | ARNTL    | -0.283355413 | 1.77E-09    |
| RP4-555D20.2 | CLDN2    | -0.372720761 | 6.47E-16    |
| RP4-555D20.2 | MVP      | -0.56804608  | 0           |
| RP4-555D20.2 | LGALS1   | -0.414947506 | 0           |
| RP4-555D20.2 | BIRC7    | -0.319119021 | 7.54E-12    |
| RP4-555D20.2 | COL8A1   | -0.515314013 | 0           |

|              |           |              |             |
|--------------|-----------|--------------|-------------|
| RP4-555D20.2 | PERP      | -0.400616566 | 0           |
| RP4-555D20.2 | GJA4      | -0.101773673 | 0.033056685 |
| RP4-555D20.2 | IGFL2     | -0.417634639 | 5.86E-20    |
| RP4-555D20.2 | DAPK2     | -0.190562725 | 6.05E-05    |
| RP4-555D20.2 | MAMLD1    | -0.417623264 | 0           |
| RP4-555D20.2 | ETV5      | -0.346959012 | 9.90E-14    |
| RP4-555D20.2 | RUNX1     | -0.438940108 | 0           |
| RP4-555D20.2 | LONRF2    | -0.260373684 | 3.49E-08    |
| RP4-555D20.2 | SPOCK1    | -0.118752287 | 0.01281907  |
| RP4-555D20.2 | XKRX      | -0.259657123 | 3.81E-08    |
| RP4-555D20.2 | TGFB1     | -0.250467921 | 1.16E-07    |
| RP4-555D20.2 | ERP27     | -0.08577175  | 0.072614994 |
| RP4-555D20.2 | TNFRSF10C | -0.357449853 | 1.45E-14    |
| RP4-555D20.2 | PALM      | -0.344003977 | 1.66E-13    |
| RP4-555D20.2 | TSC22D1   | -0.305851349 | 7.34E-11    |
| RP4-555D20.2 | TGM2      | -0.359226647 | 1.03E-14    |
| RP4-555D20.2 | UBE2QL1   | -0.315606481 | 1.69E-11    |
| RP4-555D20.2 | ECE1      | -0.411673621 | 0           |
| RP4-555D20.2 | COL8A2    | -0.367687232 | 1.82E-15    |
| RP4-555D20.2 | HIST3H2A  | -0.329764664 | 1.81E-12    |
| RP4-555D20.2 | TNFRSF21  | -0.351324475 | 4.53E-14    |
| RP4-555D20.2 | SOX4      | -0.342051163 | 2.33E-13    |
| RP4-555D20.2 | ELF3      | -0.380013021 | 5.80E-17    |
| RP4-555D20.2 | TPD52L1   | -0.44142935  | 0           |
| RP4-555D20.2 | INHBB     | -0.21516168  | 5.69E-06    |
| RP4-555D20.2 | HPN       | -0.319758622 | 8.90E-12    |
| RP4-555D20.2 | MMP7      | -0.293912934 | 3.39E-10    |
| RP4-555D20.2 | RAB27A    | -0.487488121 | 0           |
| RP4-555D20.2 | IGF2BP2   | -0.336049609 | 6.44E-13    |
| RP4-555D20.2 | ITGB4     | -0.304523612 | 8.93E-11    |
| RP4-555D20.2 | PPP1R1B   | -0.409505499 | 0           |
| RP4-555D20.2 | NPDC1     | -0.253863218 | 7.72E-08    |
| RP4-555D20.2 | CCL13     | -0.467563432 | 3.16E-25    |
| RP4-555D20.2 | SPINT1    | -0.626488935 | 0           |
| RP4-555D20.2 | HEY2      | -0.309492166 | 4.27E-11    |
| RP4-555D20.2 | CST2      | -0.260608241 | 3.01E-08    |
| RP4-555D20.2 | ADM       | -0.415396704 | 0           |
| RP4-555D20.2 | VSTM2L    | -0.273281572 | 6.77E-09    |
| RP4-555D20.2 | FAM84A    | -0.386890561 | 0           |
| RP4-555D20.2 | P4HA2     | -0.578805277 | 0           |
| RP4-555D20.2 | LPL       | -0.203350193 | 1.83E-05    |
| RP4-555D20.2 | TMEM173   | -0.309971576 | 3.98E-11    |
| RP4-555D20.2 | DHRS3     | -0.296356488 | 2.91E-10    |
| RP4-555D20.2 | SCN1B     | -0.508969497 | 0           |
| RP4-555D20.2 | GLT1D1    | -0.282833026 | 1.90E-09    |
| RP4-555D20.2 | PHYHIP    | -0.502883407 | 0           |
| RP4-555D20.2 | BHLHE40   | -0.448940618 | 0           |
| RP4-555D20.2 | BID       | -0.43500739  | 0           |
| RP4-555D20.2 | POSTN     | -0.289502918 | 7.63E-10    |
| RP4-555D20.2 | ITGA3     | -0.547364099 | 0           |
| RP4-555D20.2 | RSP04     | -0.331180482 | 1.44E-12    |

|              |            |              |             |
|--------------|------------|--------------|-------------|
| RP4-555D20.2 | ADAMTS9    | -0.219945705 | 3.47E-06    |
| RP4-555D20.2 | ABTB2      | -0.464795173 | 0           |
| RP4-555D20.2 | KCNQ3      | -0.397579833 | 0           |
| RP4-555D20.2 | ANXA1      | -0.32989487  | 1.77E-12    |
| RP4-555D20.2 | S100A11    | -0.470057047 | 0           |
| RP4-555D20.2 | CEACAM6    | -0.314235119 | 1.62E-11    |
| RP4-555D20.2 | IER5L      | -0.407107317 | 0           |
| RP4-555D20.2 | KRT80      | -0.380670578 | 4.23E-17    |
| RP4-555D20.2 | CDH6       | -0.305602425 | 7.62E-11    |
| RP4-555D20.2 | UNC5B      | -0.40597801  | 0           |
| RP4-555D20.2 | PLEKHN1    | -0.357469853 | 1.44E-14    |
| RP4-555D20.2 | SYTL1      | -0.288358434 | 8.94E-10    |
| RP4-555D20.2 | TMEM163    | -0.214739715 | 5.94E-06    |
| RP4-555D20.2 | C4orf48    | -0.231188992 | 1.05E-06    |
| RP4-555D20.2 | B3GNT7     | -0.366156809 | 2.53E-15    |
| RP4-555D20.2 | BAIAP3     | -0.355932905 | 1.93E-14    |
| RP4-555D20.2 | PHLDA2     | -0.473154344 | 0           |
| RP4-555D20.2 | GAP43      | -0.3625441   | 4.40E-15    |
| RP4-555D20.2 | S100A1     | -0.422251125 | 0           |
| RP4-555D20.2 | PTPRE      | -0.434910089 | 0           |
| RP4-555D20.2 | CCND1      | -0.323864948 | 4.67E-12    |
| RP4-555D20.2 | ST6GALNAC5 | -0.353674116 | 2.22E-14    |
| RP4-555D20.2 | KRT17      | -0.135502543 | 0.004481287 |
| RP4-555D20.2 | HPCAL4     | -0.354082782 | 2.73E-14    |
| RP4-555D20.2 | GABBR2     | -0.368429324 | 1.55E-15    |
| RP4-555D20.2 | DIRAS3     | -0.385247945 | 0           |
| RP4-555D20.2 | SERINC2    | -0.437616342 | 0           |
| RP4-555D20.2 | PTCHD4     | -0.199215073 | 2.72E-05    |
| RP4-555D20.2 | EPS8       | -0.383562069 | 0           |
| RP4-555D20.2 | LY6E       | -0.506471177 | 0           |
| RP4-555D20.2 | UPP1       | -0.352830218 | 3.44E-14    |
| RP4-555D20.2 | AHNAK2     | -0.390232528 | 0           |
| RP4-555D20.2 | PLXNC1     | -0.445397243 | 0           |
| RP4-555D20.2 | TNC        | -0.421075154 | 0           |
| RP4-555D20.2 | DUSP4      | -0.467029533 | 0           |
| RP4-555D20.2 | NRCAM      | -0.358829929 | 1.11E-14    |
| RP4-555D20.2 | NRP2       | -0.447140563 | 0           |
| RP4-555D20.2 | CTSC       | -0.493463861 | 0           |
| RP4-555D20.2 | AMIGO2     | -0.249456055 | 1.31E-07    |
| RP4-555D20.2 | NAB2       | -0.358164713 | 1.26E-14    |
| RP4-555D20.2 | TBC1D2     | -0.426943665 | 0           |
| RP4-555D20.2 | PHLDA3     | -0.404199088 | 0           |
| RP4-555D20.2 | PTP4A3     | -0.353818965 | 2.87E-14    |
| RP4-555D20.2 | CRABP2     | -0.412522091 | 0           |
| RP4-555D20.2 | GOS2       | -0.438988616 | 0           |
| RP4-555D20.2 | S100A6     | -0.46690571  | 0           |
| RP4-555D20.2 | FOXQ1      | -0.282471342 | 2.00E-09    |
| RP4-555D20.2 | LRG1       | -0.40262115  | 0           |
| RP4-555D20.2 | LAMP5      | -0.265839803 | 1.76E-08    |
| RP4-555D20.2 | ALDH3B1    | -0.351137959 | 4.68E-14    |
| RP4-555D20.2 | CDH2       | -0.113850538 | 0.017055684 |

|              |         |              |             |
|--------------|---------|--------------|-------------|
| RP4-555D20.2 | SCG5    | -0.312738109 | 2.62E-11    |
| RP4-555D20.2 | ZCCHC16 | -0.363703783 | 3.55E-15    |
| RP4-555D20.2 | GRB7    | -0.421821643 | 0           |
| RP4-555D20.2 | TIAM1   | -0.204729134 | 1.60E-05    |
| RP4-555D20.2 | FXYD5   | -0.374095717 | 3.99E-16    |
| RP4-555D20.2 | CLDN9   | -0.299741147 | 1.79E-10    |
| RP4-555D20.2 | FAM43A  | -0.459082683 | 0           |
| RP4-555D20.2 | CHST2   | -0.320205409 | 8.30E-12    |
| RP4-555D20.2 | HMGA2   | -0.423456032 | 0           |
| RP4-555D20.2 | GALNT7  | -0.517717727 | 0           |
| RP4-555D20.2 | CBLN1   | -0.273440855 | 6.63E-09    |
| RP4-555D20.2 | STRA6   | -0.360337516 | 8.29E-15    |
| RP4-555D20.2 | MUC21   | -0.451947974 | 1.74E-23    |
| RP4-555D20.2 | PRR36   | -0.396691223 | 0           |
| RP4-555D20.2 | NFE2L3  | -0.380427894 | 4.78E-17    |
| RP4-555D20.2 | NR1D1   | -0.33256694  | 1.15E-12    |
| RP4-555D20.2 | MUC1    | -0.402274784 | 0           |
| RP4-555D20.2 | NAT8L   | -0.24449445  | 2.34E-07    |
| RP4-555D20.2 | APOC1   | -0.136892122 | 0.004085437 |
| RP4-555D20.2 | EVA1A   | -0.374404355 | 3.67E-16    |
| RP4-555D20.2 | ENTPD1  | -0.212718677 | 7.28E-06    |
| RP4-555D20.2 | COL1A1  | -0.32128408  | 7.01E-12    |
| RP4-555D20.2 | FNDC4   | -0.305846243 | 7.35E-11    |
| RP4-555D20.2 | FRMD3   | -0.227812418 | 1.51E-06    |
| RP4-555D20.2 | SHROOM4 | -0.36638772  | 2.41E-15    |
| RP4-555D20.2 | NELL2   | -0.209792719 | 9.76E-06    |
| RP4-555D20.2 | EPHB3   | -0.462255721 | 0           |
| RP4-555D20.2 | TMC6    | -0.498597231 | 0           |
| RP4-555D20.2 | NOD1    | -0.293497051 | 4.37E-10    |
| RP4-555D20.2 | GGCT    | -0.519314104 | 0           |
| RP4-555D20.2 | ICAM1   | -0.41372104  | 0           |
| RP4-555D20.2 | PRSS23  | -0.363640051 | 4.28E-15    |
| RP4-555D20.2 | CFI     | -0.343519603 | 1.81E-13    |
| RP4-555D20.2 | CD55    | -0.311712201 | 3.06E-11    |
| RP4-555D20.2 | RASD2   | -0.318410176 | 1.10E-11    |
| RP4-555D20.2 | KLK11   | -0.249377891 | 1.20E-07    |
| RP4-555D20.2 | ICAM5   | -0.172955205 | 0.000277073 |
| RP4-555D20.2 | ADORA1  | -0.576830763 | 0           |
| RP4-555D20.2 | ITGA2   | -0.36742455  | 1.93E-15    |
| RP4-555D20.2 | ABCC3   | -0.240638324 | 3.64E-07    |
| RP4-555D20.2 | MFGE8   | -0.472791241 | 0           |
| RP4-555D20.2 | STK32A  | -0.214854461 | 5.87E-06    |
| RP4-555D20.2 | CYSLTR2 | -0.157903165 | 0.000912503 |
| RP4-555D20.2 | LAD1    | -0.585706363 | 0           |
| RP4-555D20.2 | MGAT3   | -0.233827163 | 7.83E-07    |
| RP4-555D20.2 | IGFBP6  | -0.362037859 | 5.92E-15    |
| RP4-555D20.2 | CYP2S1  | -0.356545925 | 1.72E-14    |
| RP4-555D20.2 | KCNJ2   | -0.402579308 | 0           |
| RP4-555D20.2 | FAM20A  | -0.345684889 | 1.24E-13    |
| RP4-555D20.2 | TGFA    | -0.48735366  | 0           |
| RP4-555D20.2 | MXRA8   | -0.386399379 | 0           |



|              |           |              |             |
|--------------|-----------|--------------|-------------|
| RP4-555D20.2 | C8orf4    | -0.246815189 | 1.78E-07    |
| RP4-555D20.2 | CLDN10    | -0.435141556 | 1.04E-21    |
| RP4-555D20.2 | PDE5A     | -0.472554799 | 0           |
| RP4-555D20.2 | APOE      | -0.164580715 | 0.000544428 |
| RP4-555D20.2 | SPOCK2    | -0.232489922 | 9.07E-07    |
| RP4-555D20.2 | TENM1     | -0.165825194 | 0.0004934   |
| RP4-555D20.2 | SLIT1     | -0.26769248  | 1.39E-08    |
| RP4-555D20.2 | CXCL14    | -0.066993081 | 0.161085711 |
| RP4-555D20.2 | ECM1      | -0.229952173 | 1.20E-06    |
| RP4-555D20.2 | DUSP5     | -0.419471401 | 0           |
| RP4-555D20.2 | SEZ6L2    | -0.451981323 | 0           |
| RP4-555D20.2 | THRSP     | -0.319172267 | 9.75E-12    |
| RP4-555D20.2 | C19orf33  | -0.309972285 | 3.98E-11    |
| RP4-555D20.2 | MPZL2     | -0.457939901 | 0           |
| RP4-555D20.2 | CTSH      | -0.522220489 | 0           |
| RP4-555D20.2 | CYP1B1    | -0.5729023   | 0           |
| RP4-555D20.2 | ALOX5     | -0.392942894 | 0           |
| RP4-555D20.2 | SYTL5     | -0.301959774 | 1.05E-10    |
| RP4-555D20.2 | TNFRSF12A | -0.327638951 | 2.56E-12    |
| RP4-555D20.2 | DUSP6     | -0.273539858 | 6.54E-09    |
| RP4-555D20.2 | ALOX15B   | -0.438099156 | 0           |
| RP4-555D20.2 | SDC4      | -0.477314995 | 0           |
| RP4-555D20.2 | MDK       | -0.367106409 | 2.07E-15    |
| RP4-555D20.2 | KRT19     | -0.420898283 | 0           |
| RP4-555D20.2 | MET       | -0.506242536 | 0           |
| RP4-555D20.2 | TESC      | -0.292472136 | 5.04E-10    |
| RP4-555D20.2 | CXCL17    | -0.556584738 | 4.48E-37    |
| RP4-555D20.2 | NPC2      | -0.527718805 | 0           |
| RP4-555D20.2 | COMP      | -0.290185438 | 6.94E-10    |
| RP4-555D20.2 | TUSC3     | -0.357920327 | 1.32E-14    |
| RP4-555D20.2 | TMPRSS4   | -0.387317633 | 0           |
| RP4-555D20.2 | LGALS3    | -0.425846271 | 0           |
| RP4-555D20.2 | CRLF1     | -0.173997992 | 0.000254168 |
| RP4-555D20.2 | CTXN1     | -0.359223243 | 1.03E-14    |
| RP4-555D20.2 | PCSK1N    | -0.109010062 | 0.022394468 |
| RP4-555D20.2 | NMU       | -0.338720876 | 3.02E-13    |
| RP4-555D20.2 | GALE      | -0.47676027  | 0           |
| RP4-555D20.2 | PCSK2     | -0.127683346 | 0.007427052 |
| RP4-555D20.2 | GJB3      | -0.465705767 | 0           |
| RP4-555D20.2 | SLPI      | -0.315778246 | 1.65E-11    |
| RP4-555D20.2 | AGR2      | -0.093718884 | 0.049749071 |
| RP4-555D20.2 | MRC2      | -0.34512449  | 1.37E-13    |
| RP4-555D20.2 | GOLT1A    | -0.480968577 | 0           |
| RP4-555D20.2 | SLC27A6   | -0.230453646 | 1.06E-06    |
| RP4-555D20.2 | KCNN4     | -0.495463339 | 0           |
| RP4-555D20.2 | ETV4      | -0.212158074 | 7.34E-06    |
| RP4-555D20.2 | SYT12     | -0.572569266 | 0           |
| RP4-555D20.2 | PVRL4     | -0.584516491 | 0           |
| RP4-555D20.2 | PLCD3     | -0.410298227 | 0           |
| RP4-555D20.2 | PLAU      | -0.498478088 | 0           |
| RP4-555D20.2 | LRRK2     | -0.281825557 | 2.18E-09    |

|              |          |              |             |
|--------------|----------|--------------|-------------|
| RP4-555D20.2 | SFN      | -0.44021182  | 0           |
| RP4-555D20.2 | LPAR5    | -0.413382759 | 0           |
| RP4-555D20.2 | NGEF     | -0.41100415  | 0           |
| RP4-555D20.2 | DTX4     | -0.350795139 | 4.98E-14    |
| RP4-555D20.2 | CST6     | -0.36354417  | 4.36E-15    |
| RP4-555D20.2 | QPCT     | -0.503905344 | 0           |
| RP4-555D20.2 | TIMP1    | -0.47384268  | 0           |
| RP4-555D20.2 | CAMK2N1  | -0.510409569 | 0           |
| RP4-555D20.2 | KLHDC8A  | -0.199471373 | 2.65E-05    |
| RP4-555D20.2 | PDLIM4   | -0.508218043 | 0           |
| RP4-555D20.2 | SCEL     | -0.352134649 | 3.91E-14    |
| RP4-555D20.2 | LCN2     | -0.497188079 | 0           |
| RP4-555D20.2 | PROS1    | -0.527417827 | 0           |
| RP4-555D20.2 | GABRB2   | -0.462579819 | 0           |
| RP4-555D20.2 | TMPRSS6  | -0.433357257 | 0           |
| RP4-555D20.2 | KLK7     | -0.342024894 | 1.72E-13    |
| RP4-555D20.2 | PDZK1IP1 | -0.482117742 | 0           |
| RP4-555D20.2 | CDH3     | -0.428619613 | 0           |
| RP4-555D20.2 | LRP4     | -0.316504027 | 1.47E-11    |
| RP4-555D20.2 | IGSF1    | -0.106582945 | 0.025579226 |
| RP4-555D20.2 | B3GNT3   | -0.400029502 | 0           |
| RP4-555D20.2 | CLDN1    | -0.408746245 | 0           |
| RP4-555D20.2 | GDF15    | -0.4825546   | 0           |
| RP4-555D20.2 | ARHGAP36 | -0.101943461 | 0.03272599  |
| RP4-555D20.2 | LAMB3    | -0.450175027 | 0           |
| RP4-555D20.2 | KLK10    | -0.406594859 | 0           |
| RP4-555D20.2 | DPP4     | -0.422449556 | 0           |
| RP4-555D20.2 | METTL7B  | -0.489126482 | 0           |
| RP4-555D20.2 | LIPH     | -0.498152571 | 0           |
| RP4-555D20.2 | CLDN16   | -0.335163978 | 7.46E-13    |
| RP4-555D20.2 | CHI3L1   | -0.550202827 | 0           |
| RP4-555D20.2 | SLC22A31 | -0.396850293 | 5.20E-18    |
| RP4-555D20.2 | TACSTD2  | -0.501370005 | 0           |
| RP4-555D20.2 | SFTPB    | -0.42204688  | 0           |
| RP4-555D20.2 | RXRG     | -0.436455547 | 0           |
| RP4-555D20.2 | DCSTAMP  | -0.538219747 | 2.46E-34    |
| RP4-555D20.2 | CITED1   | -0.537714919 | 0           |
| RP4-555D20.2 | SERPINA1 | -0.549057492 | 0           |
| RP4-555D20.2 | PRR15    | -0.352901562 | 3.39E-14    |
| RP4-555D20.2 | SLC34A2  | -0.505752205 | 0           |
| RP4-555D20.2 | FN1      | -0.550615006 | 0           |
| RP4-555D20.2 | ZCCHC12  | -0.199038061 | 2.76E-05    |
| LINC01571    | TFF3     | 0.550858222  | 3.34E-36    |
| LINC01571    | CCL21    | 0.324078049  | 3.41E-12    |
| LINC01571    | TPO      | 0.485924002  | 2.15E-27    |
| LINC01571    | MT1G     | 0.444556464  | 1.08E-22    |
| LINC01571    | DI01     | 0.407563896  | 5.36E-19    |
| LINC01571    | DPT      | 0.279493272  | 2.55E-09    |
| LINC01571    | CDH16    | 0.451971715  | 1.73E-23    |
| LINC01571    | CRABP1   | 0.649051037  | 7.40E-54    |
| LINC01571    | SLC26A7  | 0.57798133   | 1.73E-40    |

|           |           |             |             |
|-----------|-----------|-------------|-------------|
| LINC01571 | MT1H      | 0.431210777 | 2.63E-21    |
| LINC01571 | SLC26A4   | 0.631707004 | 2.85E-50    |
| LINC01571 | SLC5A8    | 0.538494668 | 2.24E-34    |
| LINC01571 | PKHD1L1   | 0.359789698 | 7.31E-15    |
| LINC01571 | TFCP2L1   | 0.470016389 | 1.65E-25    |
| LINC01571 | WSCD2     | 0.530622677 | 2.99E-33    |
| LINC01571 | IPCEF1    | 0.442222958 | 1.91E-22    |
| LINC01571 | SLC5A5    | 0.357253055 | 1.16E-14    |
| LINC01571 | MT1F      | 0.433188778 | 1.66E-21    |
| LINC01571 | FOSB      | 0.30371805  | 8.05E-11    |
| LINC01571 | SEMA3D    | 0.419156339 | 4.17E-20    |
| LINC01571 | BMP8A     | 0.456291226 | 5.83E-24    |
| LINC01571 | MATN2     | 0.603047798 | 8.03E-45    |
| LINC01571 | PLA2R1    | 0.411128975 | 2.47E-19    |
| LINC01571 | COL23A1   | 0.653252505 | 9.23E-55    |
| LINC01571 | HGD       | 0.568088041 | 7.04E-39    |
| LINC01571 | TCEAL2    | 0.476966272 | 2.55E-26    |
| LINC01571 | CHRD1     | 0.193441666 | 4.50E-05    |
| LINC01571 | TNFRSF11B | 0.398220794 | 3.90E-18    |
| LINC01571 | FAM167A   | 0.580573405 | 6.41E-41    |
| LINC01571 | KIT       | 0.494301193 | 1.99E-28    |
| LINC01571 | SLC4A4    | 0.530548265 | 3.06E-33    |
| LINC01571 | SMOC2     | 0.398175406 | 3.94E-18    |
| LINC01571 | FHL1      | 0.546830895 | 1.34E-35    |
| LINC01571 | OTOS      | 0.468025846 | 2.79E-25    |
| LINC01571 | IGFBPL1   | 0.56055245  | 1.09E-37    |
| LINC01571 | HBB       | 0.344490865 | 1.12E-13    |
| LINC01571 | BEX1      | 0.62928797  | 8.65E-50    |
| LINC01571 | FABP4     | 0.535607391 | 5.85E-34    |
| LINC01571 | LMOD1     | 0.542301323 | 6.26E-35    |
| LINC01571 | SOD3      | 0.408751925 | 4.14E-19    |
| LINC01571 | TMEM171   | 0.393287979 | 1.09E-17    |
| LINC01571 | PI16      | 0.36353691  | 3.66E-15    |
| LINC01571 | ZMAT4     | 0.455598917 | 6.95E-24    |
| LINC01571 | MFAP4     | 0.340487509 | 2.23E-13    |
| LINC01571 | CWH43     | 0.445838547 | 7.93E-23    |
| LINC01571 | SPX       | 0.658777207 | 5.67E-56    |
| LINC01571 | APOD      | 0.175003174 | 0.000228933 |
| LINC01571 | DPP6      | 0.503458914 | 1.37E-29    |
| LINC01571 | MMRN1     | 0.355274608 | 1.66E-14    |
| LINC01571 | WDR72     | 0.62698581  | 2.47E-49    |
| LINC01571 | MPPED2    | 0.608704835 | 7.46E-46    |
| LINC01571 | PAPSS2    | 0.310726228 | 2.79E-11    |
| LINC01571 | DCN       | 0.129219817 | 0.006705803 |
| LINC01571 | SORBS2    | 0.520328183 | 7.98E-32    |
| LINC01571 | EGR2      | 0.425081929 | 1.09E-20    |
| LINC01571 | EDN3      | 0.551700629 | 2.49E-36    |
| LINC01571 | DIO2      | 0.681639241 | 2.87E-61    |
| LINC01571 | ITPR1     | 0.480679571 | 9.22E-27    |
| LINC01571 | CFD       | 0.247542989 | 1.49E-07    |
| LINC01571 | CPXM1     | 0.351888385 | 3.05E-14    |

|           |            |             |             |
|-----------|------------|-------------|-------------|
| LINC01571 | ELMO1      | 0.491140917 | 4.93E-28    |
| LINC01571 | GPC3       | 0.385980609 | 4.80E-17    |
| LINC01571 | MYOC       | 0.448805388 | 3.81E-23    |
| LINC01571 | DEPTOR     | 0.428069021 | 5.47E-21    |
| LINC01571 | DGKI       | 0.432446827 | 1.97E-21    |
| LINC01571 | CARTPT     | 0.530749533 | 2.87E-33    |
| LINC01571 | IYD        | 0.443494671 | 1.41E-22    |
| LINC01571 | LYVE1      | 0.289094206 | 6.73E-10    |
| LINC01571 | CLCNKB     | 0.631057673 | 3.84E-50    |
| LINC01571 | NCAM1      | 0.245892713 | 1.81E-07    |
| LINC01571 | HBA2       | 0.328623392 | 1.63E-12    |
| LINC01571 | GLT8D2     | 0.481641227 | 7.07E-27    |
| LINC01571 | OGDHL      | 0.481653992 | 7.05E-27    |
| LINC01571 | LIFR       | 0.547245911 | 1.16E-35    |
| LINC01571 | CSGALNACT1 | 0.346426234 | 8.00E-14    |
| LINC01571 | RAP1GAP    | 0.567655296 | 8.25E-39    |
| LINC01571 | COL9A3     | 0.591058865 | 1.06E-42    |
| LINC01571 | FBLN1      | 0.116827215 | 0.014316788 |
| LINC01571 | EFEMP1     | 0.192705737 | 4.82E-05    |
| LINC01571 | AOX1       | 0.33056473  | 1.18E-12    |
| LINC01571 | GRIN2C     | 0.44487191  | 1.00E-22    |
| LINC01571 | C11orf74   | 0.578577756 | 1.38E-40    |
| LINC01571 | PPARGC1A   | 0.454220828 | 9.85E-24    |
| LINC01571 | ANGPTL1    | 0.590225855 | 1.47E-42    |
| LINC01571 | SCARA5     | 0.266636737 | 1.40E-08    |
| LINC01571 | LTF        | 0.425374964 | 1.02E-20    |
| LINC01571 | CA4        | 0.687857913 | 8.55E-63    |
| LINC01571 | TG         | 0.682911805 | 1.41E-61    |
| LINC01571 | FCGBP      | 0.513501415 | 6.63E-31    |
| LINC01571 | PBX4       | 0.554632794 | 8.93E-37    |
| LINC01571 | CYR61      | 0.336292247 | 4.56E-13    |
| LINC01571 | FOS        | 0.282146735 | 1.77E-09    |
| LINC01571 | KHDRBS2    | 0.559004927 | 1.90E-37    |
| LINC01571 | MUM1L1     | 0.359087901 | 8.31E-15    |
| LINC01571 | RGS16      | 0.536863142 | 3.86E-34    |
| LINC01571 | MT1M       | 0.360697612 | 6.19E-15    |
| LINC01571 | LRP2       | 0.38752116  | 3.52E-17    |
| LINC01571 | MAFB       | 0.331890329 | 9.51E-13    |
| LINC01571 | KCNK2      | 0.379809754 | 1.63E-16    |
| LINC01571 | TBC1D4     | 0.527547273 | 8.07E-33    |
| LINC01571 | MIOX       | 0.5720939   | 1.59E-39    |
| LINC01571 | TPPP       | 0.478878663 | 1.51E-26    |
| LINC01571 | FMOD       | 0.351940014 | 3.02E-14    |
| LINC01571 | CITED2     | 0.297972082 | 1.88E-10    |
| LINC01571 | RGS8       | 0.534969294 | 7.21E-34    |
| LINC01571 | ABI3BP     | 0.408406976 | 4.46E-19    |
| LINC01571 | ADH1B      | 0.3134219   | 1.84E-11    |
| LINC01571 | OGN        | 0.208721781 | 1.04E-05    |
| LINC01571 | NR4A1      | 0.267684443 | 1.22E-08    |
| LINC01571 | FOXJ1      | 0.613597208 | 9.19E-47    |
| LINC01571 | ALDH1A1    | 0.565977645 | 1.53E-38    |

|           |          |             |             |
|-----------|----------|-------------|-------------|
| LINC01571 | OCA2     | 0.416522938 | 7.51E-20    |
| LINC01571 | TMEM139  | 0.254475142 | 6.45E-08    |
| LINC01571 | ARHGAP24 | 0.485272827 | 2.58E-27    |
| LINC01571 | SLC25A15 | 0.403826485 | 1.19E-18    |
| LINC01571 | DES      | 0.159975312 | 0.000768248 |
| LINC01571 | GDF10    | 0.441342937 | 2.37E-22    |
| LINC01571 | KIAA1324 | 0.438085282 | 5.19E-22    |
| LINC01571 | JUN      | 0.361564805 | 5.28E-15    |
| LINC01571 | C7       | 0.106859887 | 0.025156296 |
| LINC01571 | LGI3     | 0.555579699 | 6.40E-37    |
| LINC01571 | CDON     | 0.567697989 | 8.12E-39    |
| LINC01571 | BCL2     | 0.506352961 | 5.79E-30    |
| LINC01571 | HLF      | 0.628045192 | 1.52E-49    |
| LINC01571 | EGR1     | 0.397464376 | 4.57E-18    |
| LINC01571 | IP6K3    | 0.424055453 | 1.38E-20    |
| LINC01571 | SCUBE3   | 0.413561767 | 1.45E-19    |
| LINC01571 | PKNOX2   | 0.523103796 | 3.33E-32    |
| LINC01571 | SMAD9    | 0.30629424  | 5.47E-11    |
| LINC01571 | IQGAP2   | 0.374430293 | 4.66E-16    |
| LINC01571 | GNA14    | 0.492096759 | 3.75E-28    |
| LINC01571 | LAYN     | 0.463761651 | 8.54E-25    |
| LINC01571 | AVPR1A   | 0.549308083 | 5.72E-36    |
| LINC01571 | PDLIM3   | 0.310260576 | 2.99E-11    |
| LINC01571 | GPM6A    | 0.55299117  | 1.59E-36    |
| LINC01571 | SDPR     | 0.575913059 | 3.79E-40    |
| LINC01571 | CRYAB    | 0.29783989  | 1.92E-10    |
| LINC01571 | FOXA2    | 0.288079224 | 7.77E-10    |
| LINC01571 | C8orf88  | 0.505560658 | 7.34E-30    |
| LINC01571 | ISM1     | 0.328830616 | 1.58E-12    |
| LINC01571 | BMP2     | 0.135890564 | 0.004339757 |
| LINC01571 | ID4      | 0.492940974 | 2.95E-28    |
| LINC01571 | NUPR1    | 0.353740354 | 2.19E-14    |
| LINC01571 | SERTM1   | 0.30117516  | 1.18E-10    |
| LINC01571 | IRS1     | 0.59567751  | 1.65E-43    |
| LINC01571 | FIBIN    | 0.176618416 | 0.00019978  |
| LINC01571 | PODN     | 0.162929988 | 0.000610389 |
| LINC01571 | TDRD9    | 0.274809495 | 4.78E-09    |
| LINC01571 | EPHA3    | 0.358222269 | 9.74E-15    |
| LINC01571 | AIF1L    | 0.419907707 | 3.52E-20    |
| LINC01571 | EBF4     | 0.471731627 | 1.04E-25    |
| LINC01571 | ADM2     | 0.36333082  | 3.81E-15    |
| LINC01571 | GSTM3    | 0.54606313  | 1.74E-35    |
| LINC01571 | HSD17B6  | 0.307117747 | 4.83E-11    |
| LINC01571 | AGR3     | 0.304629322 | 7.03E-11    |
| LINC01571 | EPHB1    | 0.54978806  | 4.84E-36    |
| LINC01571 | TMOD1    | 0.335366617 | 5.33E-13    |
| LINC01571 | WASF3    | 0.563317488 | 4.02E-38    |
| LINC01571 | SELV     | 0.472278805 | 9.02E-26    |
| LINC01571 | ENPP1    | 0.480923814 | 8.62E-27    |
| LINC01571 | SYNE1    | 0.502148214 | 2.02E-29    |
| LINC01571 | PLCH1    | 0.454455143 | 9.28E-24    |

|           |          |              |             |
|-----------|----------|--------------|-------------|
| LINC01571 | CCDC146  | 0.512226582  | 9.80E-31    |
| LINC01571 | SLC16A2  | 0.517977373  | 1.66E-31    |
| LINC01571 | IER2     | 0.457798814  | 3.97E-24    |
| LINC01571 | KCNAB1   | 0.587834195  | 3.80E-42    |
| LINC01571 | SYNDIG1  | 0.397326085  | 4.71E-18    |
| LINC01571 | C16orf89 | 0.671760136  | 6.37E-59    |
| LINC01571 | CTGF     | 0.178364149  | 0.0001722   |
| LINC01571 | NR4A3    | 0.122142139  | 0.010423243 |
| LINC01571 | KIAA1456 | 0.575097354  | 5.16E-40    |
| LINC01571 | AQP4     | 0.545390538  | 2.19E-35    |
| LINC01571 | RNF150   | 0.45041576   | 2.56E-23    |
| LINC01571 | C1S      | -0.002465415 | 0.958919949 |
| LINC01571 | PFKFB2   | 0.488332824  | 1.09E-27    |
| LINC01571 | PROX1    | 0.528376028  | 6.18E-33    |
| LINC01571 | TCF7L1   | 0.517623631  | 1.86E-31    |
| LINC01571 | HSPB6    | 0.377649005  | 2.50E-16    |
| LINC01571 | FHDC1    | 0.570849328  | 2.53E-39    |
| LINC01571 | PRR15L   | 0.51346241   | 6.71E-31    |
| LINC01571 | SLC1A1   | 0.400127937  | 2.62E-18    |
| LINC01571 | BTBD11   | 0.706702873  | 1.16E-67    |
| LINC01571 | TRIM58   | 0.416538221  | 7.49E-20    |
| LINC01571 | LRIG1    | 0.432066703  | 2.16E-21    |
| LINC01571 | ROR2     | 0.243783877  | 2.32E-07    |
| LINC01571 | GPR125   | 0.445898528  | 7.81E-23    |
| LINC01571 | FLRT1    | 0.576182976  | 3.42E-40    |
| LINC01571 | PGF      | 0.437121782  | 6.53E-22    |
| LINC01571 | DUSP1    | 0.221284237  | 2.85E-06    |
| LINC01571 | PLA2G7   | 0.294249848  | 3.23E-10    |
| LINC01571 | PLSCR4   | 0.436419404  | 7.71E-22    |
| LINC01571 | FAM46B   | 0.295096049  | 2.86E-10    |
| LINC01571 | GLDC     | 0.310484537  | 2.89E-11    |
| LINC01571 | ZBTB16   | 0.384623     | 6.30E-17    |
| LINC01571 | OMD      | 0.137344561  | 0.003937095 |
| LINC01571 | HSD11B2  | 0.630166368  | 5.79E-50    |
| LINC01571 | FGL2     | 0.141617242  | 0.002941828 |
| LINC01571 | CLCNKA   | 0.575799752  | 3.96E-40    |
| LINC01571 | GATM     | 0.672548326  | 4.17E-59    |
| LINC01571 | TNS3     | 0.278429323  | 2.94E-09    |
| LINC01571 | TOB1     | 0.208971772  | 1.01E-05    |
| LINC01571 | MARC2    | 0.615090347  | 4.82E-47    |
| LINC01571 | LRRC2    | 0.474706096  | 4.70E-26    |
| LINC01571 | SORD     | 0.468802972  | 2.27E-25    |
| LINC01571 | RIMS4    | 0.543066393  | 4.83E-35    |
| LINC01571 | SLC29A4  | 0.424977111  | 1.11E-20    |
| LINC01571 | SLC39A14 | 0.492418729  | 3.42E-28    |
| LINC01571 | FAXDC2   | 0.550388599  | 3.93E-36    |
| LINC01571 | HSPB8    | 0.102861495  | 0.031180514 |
| LINC01571 | CCL19    | -0.035656359 | 0.456156477 |
| LINC01571 | KCNIP3   | 0.618024108  | 1.34E-47    |
| LINC01571 | CGNL1    | 0.513668641  | 6.30E-31    |
| LINC01571 | ATF3     | 0.04835217   | 0.312115348 |

|           |          |              |             |
|-----------|----------|--------------|-------------|
| LINC01571 | SGCD     | 0.118639894  | 0.012864967 |
| LINC01571 | STARD13  | 0.389314125  | 2.45E-17    |
| LINC01571 | LDHD     | 0.639492591  | 7.48E-52    |
| LINC01571 | RCAN1    | 0.204316674  | 1.60E-05    |
| LINC01571 | ID3      | 0.213102072  | 6.67E-06    |
| LINC01571 | SYTL3    | 0.592785875  | 5.30E-43    |
| LINC01571 | MT1E     | 0.308056851  | 4.19E-11    |
| LINC01571 | CAMK1D   | 0.616307594  | 2.84E-47    |
| LINC01571 | PRKCQ    | 0.619660626  | 6.52E-48    |
| LINC01571 | NUAK2    | 0.198208028  | 2.88E-05    |
| LINC01571 | LIPG     | 0.635386404  | 5.17E-51    |
| LINC01571 | SLC25A25 | 0.220995598  | 2.94E-06    |
| LINC01571 | PRKX     | 0.287412868  | 8.53E-10    |
| LINC01571 | SRPX     | 0.16497131   | 0.000519519 |
| LINC01571 | FAM189A1 | 0.652480769  | 1.36E-54    |
| LINC01571 | PLEKHH1  | 0.530847967  | 2.78E-33    |
| LINC01571 | WNT11    | 0.370156454  | 1.06E-15    |
| LINC01571 | SNAI1    | 0.205600585  | 1.41E-05    |
| LINC01571 | FDCSP    | -0.015103758 | 0.752325401 |
| LINC01571 | MT1X     | 0.440044622  | 3.24E-22    |
| LINC01571 | ACACB    | 0.536195514  | 4.81E-34    |
| LINC01571 | ARC      | 0.295442131  | 2.72E-10    |
| LINC01571 | KLK4     | 0.153940978  | 0.001214162 |
| LINC01571 | ZFPM2    | 0.360779878  | 6.10E-15    |
| LINC01571 | AKAP12   | 0.362186761  | 4.70E-15    |
| LINC01571 | GJB6     | 0.340090696  | 2.39E-13    |
| LINC01571 | ERO1LB   | 0.489208385  | 8.53E-28    |
| LINC01571 | DNALI1   | 0.478116146  | 1.86E-26    |
| LINC01571 | HKDC1    | 0.23928863   | 3.91E-07    |
| LINC01571 | ZFP36L2  | 0.343939118  | 1.23E-13    |
| LINC01571 | CAPSL    | 0.614719212  | 5.66E-47    |
| LINC01571 | CYP7B1   | 0.392159947  | 1.37E-17    |
| LINC01571 | CPQ      | 0.475050193  | 4.28E-26    |
| LINC01571 | RPS6KA6  | 0.581205524  | 5.03E-41    |
| LINC01571 | TLE1     | 0.277357601  | 3.40E-09    |
| LINC01571 | TP53INP2 | 0.459183003  | 2.79E-24    |
| LINC01571 | KATNAL2  | 0.579271198  | 1.06E-40    |
| LINC01571 | SGPP2    | 0.12613585   | 0.008147873 |
| LINC01571 | CTH      | 0.372385993  | 6.90E-16    |
| LINC01571 | KIF12    | 0.357634354  | 1.08E-14    |
| LINC01571 | TMEM220  | 0.600086946  | 2.73E-44    |
| LINC01571 | CENPJ    | 0.271466675  | 7.45E-09    |
| LINC01571 | FAM155B  | 0.585090779  | 1.11E-41    |
| LINC01571 | WFS1     | 0.3786074    | 2.07E-16    |
| LINC01571 | SELENBP1 | 0.673502465  | 2.49E-59    |
| LINC01571 | SNTA1    | 0.500502317  | 3.28E-29    |
| LINC01571 | FRAS1    | 0.080086265  | 0.093757343 |
| LINC01571 | FBLN7    | 0.430845201  | 2.87E-21    |
| LINC01571 | AGPAT9   | 0.503957755  | 1.18E-29    |
| LINC01571 | GPR83    | 0.567987762  | 7.30E-39    |
| LINC01571 | PRTG     | 0.530905695  | 2.73E-33    |

|           |          |              |             |
|-----------|----------|--------------|-------------|
| LINC01571 | EGR3     | 0.249643882  | 1.16E-07    |
| LINC01571 | GRAMD2   | 0.2153909    | 5.27E-06    |
| LINC01571 | HYOU1    | 0.351721869  | 3.14E-14    |
| LINC01571 | FBLN5    | 0.246048167  | 1.78E-07    |
| LINC01571 | ITM2A    | 0.519901962  | 9.12E-32    |
| LINC01571 | SRF      | 0.33427362   | 6.40E-13    |
| LINC01571 | FGFR2    | 0.490071181  | 6.68E-28    |
| LINC01571 | MT1A     | 0.185923441  | 8.90E-05    |
| LINC01571 | MAMDC2   | 0.217791637  | 4.11E-06    |
| LINC01571 | FHL2     | 0.199708383  | 2.50E-05    |
| LINC01571 | FTCDNL1  | 0.520668876  | 7.17E-32    |
| LINC01571 | PKIA     | 0.569076505  | 4.89E-39    |
| LINC01571 | DNAJB4   | 0.446351698  | 6.99E-23    |
| LINC01571 | SLC25A33 | 0.432839574  | 1.80E-21    |
| LINC01571 | EYA2     | 0.292424403  | 4.20E-10    |
| LINC01571 | LPAR1    | 0.047250804  | 0.323278318 |
| LINC01571 | STX11    | 0.207096968  | 1.22E-05    |
| LINC01571 | ARHGEF28 | 0.436166934  | 8.19E-22    |
| LINC01571 | OR2W3    | 0.487864619  | 1.25E-27    |
| LINC01571 | ALDH1B1  | 0.394463469  | 8.53E-18    |
| LINC01571 | CXCL12   | 0.221507063  | 2.78E-06    |
| LINC01571 | OLFM2    | 0.421754285  | 2.32E-20    |
| LINC01571 | TUB      | 0.508517397  | 3.02E-30    |
| LINC01571 | HTRA3    | 0.099920784  | 0.036363081 |
| LINC01571 | CKB      | 0.395039243  | 7.57E-18    |
| LINC01571 | RGS2     | -0.016059804 | 0.737208321 |
| LINC01571 | SHANK2   | 0.510238733  | 1.79E-30    |
| LINC01571 | CNTFR    | 0.526285279  | 1.21E-32    |
| LINC01571 | CYTH3    | 0.541407181  | 8.46E-35    |
| LINC01571 | PLAC9    | 0.416181926  | 8.10E-20    |
| LINC01571 | WWOX     | 0.670239074  | 1.44E-58    |
| LINC01571 | NPR3     | 0.263540243  | 2.08E-08    |
| LINC01571 | SDC2     | 0.43049926   | 3.11E-21    |
| LINC01571 | KLF15    | 0.569619741  | 4.00E-39    |
| LINC01571 | TMEM164  | 0.408495625  | 4.38E-19    |
| LINC01571 | LONRF3   | 0.308878089  | 3.70E-11    |
| LINC01571 | GBP1     | 0.063955826  | 0.181035837 |
| LINC01571 | ARHGAP6  | 0.345789952  | 8.94E-14    |
| LINC01571 | TMEM119  | 0.08094665   | 0.090271776 |
| LINC01571 | SH3RF1   | 0.431594669  | 2.41E-21    |
| LINC01571 | CRELD2   | 0.407484325  | 5.45E-19    |
| LINC01571 | PCP4     | 0.178355071  | 0.000172333 |
| LINC01571 | GCSH     | 0.693305779  | 3.66E-64    |
| LINC01571 | IMPA2    | 0.468155201  | 2.70E-25    |
| LINC01571 | C1R      | -0.046105894 | 0.33515417  |
| LINC01571 | SUCNR1   | 0.37430264   | 4.77E-16    |
| LINC01571 | SFRP1    | 0.335123366  | 5.55E-13    |
| LINC01571 | UGT8     | 0.452433821  | 1.54E-23    |
| LINC01571 | TLE4     | 0.207076543  | 1.22E-05    |
| LINC01571 | ANTXR1   | 0.209393313  | 9.69E-06    |
| LINC01571 | GPX3     | 0.291069431  | 5.09E-10    |



|           |          |              |             |
|-----------|----------|--------------|-------------|
| LINC01571 | DPY19L2  | 0.455955497  | 6.35E-24    |
| LINC01571 | FAM46C   | 0.417152518  | 6.53E-20    |
| LINC01571 | IL33     | 0.181409968  | 0.000132437 |
| LINC01571 | PEG3     | 0.513353763  | 6.94E-31    |
| LINC01571 | FAHD2A   | 0.562481783  | 5.44E-38    |
| LINC01571 | PTGDS    | 0.160483013  | 0.000738681 |
| LINC01571 | CHCHD10  | 0.395317244  | 7.15E-18    |
| LINC01571 | CD36     | 0.518014818  | 1.64E-31    |
| LINC01571 | ANKRD37  | 0.407484325  | 5.45E-19    |
| LINC01571 | TSPAN33  | 0.423055926  | 1.73E-20    |
| LINC01571 | PRDM16   | 0.505556119  | 7.35E-30    |
| LINC01571 | UST      | 0.684697536  | 5.15E-62    |
| LINC01571 | NEXN     | 0.38816425   | 3.09E-17    |
| LINC01571 | NUPR1L   | 0.408339961  | 4.53E-19    |
| LINC01571 | SLC24A3  | 0.302400099  | 9.80E-11    |
| LINC01571 | MARC1    | 0.604897781  | 3.71E-45    |
| LINC01571 | MYH11    | 0.201642901  | 2.08E-05    |
| LINC01571 | APOA1    | 0.431689999  | 2.35E-21    |
| LINC01571 | TMEM178B | 0.201179944  | 2.17E-05    |
| LINC01571 | CAPN6    | 0.113799212  | 0.017064565 |
| LINC01571 | PPM1L    | 0.47343495   | 6.61E-26    |
| LINC01571 | FZD8     | 0.46207237   | 1.32E-24    |
| LINC01571 | RCAN2    | 0.46339642   | 9.39E-25    |
| LINC01571 | COPZ2    | 0.44781092   | 4.88E-23    |
| LINC01571 | GAS1     | 0.125608783  | 0.00842029  |
| LINC01571 | DACT1    | 0.285086879  | 1.18E-09    |
| LINC01571 | WBSCR17  | 0.476188153  | 3.15E-26    |
| LINC01571 | NCS1     | 0.383150872  | 8.45E-17    |
| LINC01571 | SPIRE2   | 0.34255819   | 1.57E-13    |
| LINC01571 | C15orf52 | 0.1784206    | 0.00017137  |
| LINC01571 | SPAG5    | 0.281756541  | 1.87E-09    |
| LINC01571 | ARL4D    | 0.355968475  | 1.47E-14    |
| LINC01571 | FAM189A2 | 0.556249313  | 5.05E-37    |
| LINC01571 | MAP1LC3A | 0.567091493  | 1.01E-38    |
| LINC01571 | KLF6     | -0.001292988 | 0.978448661 |
| LINC01571 | ADD3     | 0.47929765   | 1.35E-26    |
| LINC01571 | TSPAN7   | 0.545146011  | 2.39E-35    |
| LINC01571 | KLF9     | 0.427833855  | 5.77E-21    |
| LINC01571 | KCNQ1    | 0.658541899  | 6.40E-56    |
| LINC01571 | MAN1A1   | 0.034179936  | 0.475031735 |
| LINC01571 | MLF1     | 0.421527346  | 2.44E-20    |
| LINC01571 | RARB     | 0.518294095  | 1.51E-31    |
| LINC01571 | CDC42EP2 | 0.429374916  | 4.04E-21    |
| LINC01571 | FAM3B    | 0.179832306  | 0.000151811 |
| LINC01571 | GADD45B  | 0.098281146  | 0.03955817  |
| LINC01571 | TMEM47   | 0.438200596  | 5.04E-22    |
| LINC01571 | SDF2L1   | 0.404532834  | 1.03E-18    |
| LINC01571 | CCDC85A  | 0.195098814  | 3.86E-05    |
| LINC01571 | CRYBG3   | 0.068981119  | 0.149044868 |
| LINC01571 | FBLN2    | 0.045586486  | 0.340633038 |
| LINC01571 | PEBP4    | 0.51170377   | 1.15E-30    |

|           |          |              |             |
|-----------|----------|--------------|-------------|
| LINC01571 | CDADC1   | 0.697900171  | 2.43E-65    |
| LINC01571 | FAM63A   | 0.539479472  | 1.62E-34    |
| LINC01571 | GLUL     | 0.262618727  | 2.34E-08    |
| LINC01571 | FREM2    | 0.384219048  | 6.83E-17    |
| LINC01571 | ACKR3    | 0.412445933  | 1.85E-19    |
| LINC01571 | DENND6A  | 0.494830955  | 1.71E-28    |
| LINC01571 | CLDN8    | 0.052784442  | 0.26977835  |
| LINC01571 | UTS2R    | 0.087100413  | 0.068270159 |
| LINC01571 | SCNN1B   | 0.460996251  | 1.75E-24    |
| LINC01571 | TTC30A   | 0.404589569  | 1.01E-18    |
| LINC01571 | CORO2B   | 0.578074659  | 1.67E-40    |
| LINC01571 | TC2N     | 0.071703969  | 0.133611061 |
| LINC01571 | ALDH2    | 0.503101058  | 1.53E-29    |
| LINC01571 | GPR183   | -0.02607408  | 0.585858277 |
| LINC01571 | C4orf47  | 0.55225078   | 2.06E-36    |
| LINC01571 | SLC25A42 | 0.675100829  | 1.05E-59    |
| LINC01571 | LGMN     | 0.415021414  | 1.05E-19    |
| LINC01571 | ACSF2    | 0.478574564  | 1.64E-26    |
| LINC01571 | KIAA1467 | 0.511055007  | 1.40E-30    |
| LINC01571 | PRKG1    | 0.534693742  | 7.90E-34    |
| LINC01571 | GNAI1    | 0.410852676  | 2.62E-19    |
| LINC01571 | ABCC4    | 0.216244051  | 4.83E-06    |
| LINC01571 | PRPS1    | 0.539942003  | 1.38E-34    |
| LINC01571 | TSPAN5   | 0.190486268  | 5.90E-05    |
| LINC01571 | CR2      | 0.105021407  | 0.027788676 |
| LINC01571 | CCDC170  | 0.317498388  | 9.74E-12    |
| LINC01571 | RRAD     | -0.081321384 | 0.088786512 |
| LINC01571 | SCGB2A1  | 0.438513205  | 4.68E-22    |
| LINC01571 | SESN3    | 0.155313755  | 0.00109565  |
| LINC01571 | SGK223   | 0.195242496  | 3.81E-05    |
| LINC01571 | NDRG2    | 0.628020654  | 1.54E-49    |
| LINC01571 | C3orf52  | 0.059690639  | 0.21195592  |
| LINC01571 | FLRT3    | -0.410605737 | 2.77E-19    |
| LINC01571 | MST1R    | -0.561118301 | 8.89E-38    |
| LINC01571 | SDC1     | -0.461459916 | 1.55E-24    |
| LINC01571 | ST8SIA4  | -0.55886933  | 1.99E-37    |
| LINC01571 | UBTD1    | -0.179033337 | 0.000162607 |
| LINC01571 | EPHA2    | -0.422546163 | 1.94E-20    |
| LINC01571 | TMEM130  | -0.181401735 | 0.000132532 |
| LINC01571 | SPINK2   | -0.289706801 | 6.18E-10    |
| LINC01571 | MMP16    | -0.686753183 | 1.61E-62    |
| LINC01571 | SIGLEC15 | -0.433870731 | 1.41E-21    |
| LINC01571 | RIN1     | -0.381485986 | 1.17E-16    |
| LINC01571 | IL1RN    | -0.557515068 | 3.22E-37    |
| LINC01571 | FCER1G   | -0.356202649 | 1.41E-14    |
| LINC01571 | CD276    | -0.583934239 | 1.75E-41    |
| LINC01571 | CTSB     | -0.223044579 | 2.36E-06    |
| LINC01571 | FAM171A2 | 0.052527008  | 0.272124393 |
| LINC01571 | ASPHD1   | -0.421102969 | 2.69E-20    |
| LINC01571 | C15orf48 | -0.423778303 | 1.47E-20    |
| LINC01571 | DYSF     | -0.133573511 | 0.005058754 |

|           |          |              |             |
|-----------|----------|--------------|-------------|
| LINC01571 | PDZRN4   | 0.084485773  | 0.07701257  |
| LINC01571 | EFHD2    | -0.200714434 | 2.27E-05    |
| LINC01571 | ASF1B    | -0.410803316 | 2.65E-19    |
| LINC01571 | AQP1     | -0.028178094 | 0.555975138 |
| LINC01571 | ARRDC2   | -0.340508926 | 2.23E-13    |
| LINC01571 | PRSS1    | -0.184155437 | 0.000104146 |
| LINC01571 | MAPK13   | -0.502946314 | 1.60E-29    |
| LINC01571 | CST5     | -0.653684794 | 7.43E-55    |
| LINC01571 | AHR      | -0.593000616 | 4.86E-43    |
| LINC01571 | BAX      | -0.513161431 | 7.36E-31    |
| LINC01571 | C1orf115 | 0.046050294  | 0.335737939 |
| LINC01571 | PLK3     | -0.403709044 | 1.22E-18    |
| LINC01571 | JAG2     | -0.262245695 | 2.45E-08    |
| LINC01571 | RAD23B   | -0.263685201 | 2.04E-08    |
| LINC01571 | CA12     | 0.101885371  | 0.032825943 |
| LINC01571 | ADTRP    | -0.101159165 | 0.034097652 |
| LINC01571 | UCP2     | -0.22877693  | 1.27E-06    |
| LINC01571 | IGFBP2   | -0.323037841 | 4.04E-12    |
| LINC01571 | LOXL2    | -0.372468542 | 6.79E-16    |
| LINC01571 | GPX1     | -0.354905973 | 1.78E-14    |
| LINC01571 | P3H3     | -0.375630803 | 3.69E-16    |
| LINC01571 | C2orf81  | -0.120853406 | 0.011269295 |
| LINC01571 | CDT1     | -0.376571042 | 3.08E-16    |
| LINC01571 | SNX25    | -0.250728228 | 1.02E-07    |
| LINC01571 | MTHFD1L  | -0.620888511 | 3.79E-48    |
| LINC01571 | CDC42BPG | -0.551786991 | 2.42E-36    |
| LINC01571 | MSN      | -0.412798824 | 1.71E-19    |
| LINC01571 | SIGLEC6  | -0.322615442 | 4.32E-12    |
| LINC01571 | F2R      | -0.466281248 | 4.42E-25    |
| LINC01571 | TMEM184A | -0.604602476 | 4.20E-45    |
| LINC01571 | CKS2     | -0.41197319  | 2.05E-19    |
| LINC01571 | TAX1BP3  | -0.540618141 | 1.10E-34    |
| LINC01571 | PMEP1    | -0.452279927 | 1.60E-23    |
| LINC01571 | CXCL16   | -0.619750976 | 6.27E-48    |
| LINC01571 | FAXC     | -0.695713324 | 8.89E-65    |
| LINC01571 | VTCN1    | -0.646141283 | 3.07E-53    |
| LINC01571 | SH2D4A   | -0.480027828 | 1.10E-26    |
| LINC01571 | RNF24    | -0.38220198  | 1.02E-16    |
| LINC01571 | LY6G6C   | -0.441788596 | 2.13E-22    |
| LINC01571 | NID1     | -0.532468457 | 1.64E-33    |
| LINC01571 | STAC     | -0.666261958 | 1.18E-57    |
| LINC01571 | RAB34    | -0.304205119 | 7.49E-11    |
| LINC01571 | HES4     | -0.295171081 | 2.83E-10    |
| LINC01571 | EPHA10   | -0.39391419  | 9.55E-18    |
| LINC01571 | ENTPD2   | -0.146063698 | 0.002154106 |
| LINC01571 | DDB2     | -0.453828081 | 1.09E-23    |
| LINC01571 | NKAIN4   | -0.423993044 | 1.40E-20    |
| LINC01571 | TRIM29   | -0.528807213 | 5.38E-33    |
| LINC01571 | ADCY8    | -0.373045925 | 6.08E-16    |
| LINC01571 | SFTA2    | -0.449329004 | 3.35E-23    |
| LINC01571 | NRIP1    | -0.395666022 | 6.65E-18    |

|           |          |              |             |
|-----------|----------|--------------|-------------|
| LINC01571 | VWA1     | -0.075532581 | 0.114031451 |
| LINC01571 | APLNR    | -0.114092876 | 0.016779248 |
| LINC01571 | REN      | -0.229858886 | 1.13E-06    |
| LINC01571 | EDIL3    | -0.261584024 | 2.66E-08    |
| LINC01571 | AGRN     | -0.434002072 | 1.37E-21    |
| LINC01571 | TREM1    | -0.502998084 | 1.57E-29    |
| LINC01571 | SRL      | -0.323020254 | 4.05E-12    |
| LINC01571 | RASGRF1  | -0.38525063  | 5.55E-17    |
| LINC01571 | RMI2     | -0.342726551 | 1.52E-13    |
| LINC01571 | SAMD1    | -0.351943135 | 3.02E-14    |
| LINC01571 | MGAT4B   | -0.446095115 | 7.44E-23    |
| LINC01571 | NXN      | -0.62395333  | 9.67E-49    |
| LINC01571 | SH3BGRL3 | -0.407339368 | 5.62E-19    |
| LINC01571 | CA11     | 0.012731594  | 0.79023402  |
| LINC01571 | PLD3     | -0.144297399 | 0.002440506 |
| LINC01571 | LURAP1L  | -0.473116668 | 7.20E-26    |
| LINC01571 | CARNS1   | 0.011555196  | 0.809224951 |
| LINC01571 | PDLIM7   | -0.332867729 | 8.09E-13    |
| LINC01571 | BCL2L1   | -0.735804753 | 5.44E-76    |
| LINC01571 | GGT6     | -0.168067758 | 0.000405377 |
| LINC01571 | DPYSL3   | -0.464612249 | 6.84E-25    |
| LINC01571 | FYN      | -0.376326089 | 3.23E-16    |
| LINC01571 | TK1      | -0.399382441 | 3.06E-18    |
| LINC01571 | AK1      | -0.11957602  | 0.012167307 |
| LINC01571 | HIGD1B   | 0.097681741  | 0.040784025 |
| LINC01571 | TMEM59L  | -0.442777825 | 1.67E-22    |
| LINC01571 | MEGF9    | -0.354550528 | 1.89E-14    |
| LINC01571 | ZFP36L1  | -0.50807217  | 3.45E-30    |
| LINC01571 | ADRA1B   | -0.269947315 | 9.09E-09    |
| LINC01571 | EPHA4    | -0.55095226  | 3.23E-36    |
| LINC01571 | TCERG1L  | -0.15513972  | 0.001110061 |
| LINC01571 | NGFR     | 0.030241967  | 0.527401538 |
| LINC01571 | EBI3     | -0.486336323 | 1.92E-27    |
| LINC01571 | S100A10  | -0.637724023 | 1.73E-51    |
| LINC01571 | S100B    | -0.349052208 | 5.04E-14    |
| LINC01571 | CD44     | -0.112100631 | 0.018799538 |
| LINC01571 | BHLHE41  | -0.154643432 | 0.001152119 |
| LINC01571 | FBXO2    | -0.135208185 | 0.004541262 |
| LINC01571 | SLC30A2  | -0.477079174 | 2.47E-26    |
| LINC01571 | FRMD5    | -0.529041244 | 4.99E-33    |
| LINC01571 | SAMD11   | -0.187554492 | 7.70E-05    |
| LINC01571 | SIPA1L2  | -0.369798882 | 1.13E-15    |
| LINC01571 | S100A16  | -0.534766788 | 7.71E-34    |
| LINC01571 | PPL      | -0.601264763 | 1.68E-44    |
| LINC01571 | ARHGDIB  | -0.286525392 | 9.66E-10    |
| LINC01571 | CDC42EP3 | -0.684412159 | 6.05E-62    |
| LINC01571 | RUNX2    | -0.267521756 | 1.25E-08    |
| LINC01571 | LAMC2    | -0.610509146 | 3.46E-46    |
| LINC01571 | BRINP1   | -0.216626302 | 4.64E-06    |
| LINC01571 | GPRC5B   | -0.26293474  | 2.24E-08    |
| LINC01571 | AQP5     | -0.117080536 | 0.014105605 |

|           |          |              |             |
|-----------|----------|--------------|-------------|
| LINC01571 | PLAG1    | -0.142751656 | 0.002719192 |
| LINC01571 | PTPRU    | -0.596240888 | 1.32E-43    |
| LINC01571 | ANGPTL4  | -0.483435184 | 4.30E-27    |
| LINC01571 | PALM3    | -0.082654228 | 0.08366213  |
| LINC01571 | ACP5     | -0.381362304 | 1.20E-16    |
| LINC01571 | DLG4     | -0.079355378 | 0.096802071 |
| LINC01571 | ETNK2    | -0.129996092 | 0.006380898 |
| LINC01571 | CD109    | -0.543729766 | 3.86E-35    |
| LINC01571 | SNX22    | -0.131532473 | 0.005779166 |
| LINC01571 | TMEM98   | -0.29994901  | 1.41E-10    |
| LINC01571 | CTHRC1   | -0.458721181 | 3.14E-24    |
| LINC01571 | S100A2   | -0.512814497 | 8.19E-31    |
| LINC01571 | C11orf80 | -0.46316097  | 9.99E-25    |
| LINC01571 | SREBF1   | -0.527038077 | 9.50E-33    |
| LINC01571 | PRSS22   | -0.486645386 | 1.76E-27    |
| LINC01571 | CMTM3    | -0.570817415 | 2.56E-39    |
| LINC01571 | RDH5     | -0.136368981 | 0.004203337 |
| LINC01571 | MYH10    | -0.509037372 | 2.58E-30    |
| LINC01571 | EVPL     | -0.519406383 | 1.07E-31    |
| LINC01571 | SCD      | -0.476026175 | 3.29E-26    |
| LINC01571 | CD151    | -0.359869566 | 7.21E-15    |
| LINC01571 | S100A4   | -0.425793952 | 9.24E-21    |
| LINC01571 | BNIP1    | -0.074521282 | 0.118970097 |
| LINC01571 | MAP3K6   | -0.463431028 | 9.31E-25    |
| LINC01571 | MANEAL   | -0.289147537 | 6.68E-10    |
| LINC01571 | CD207    | -0.310506884 | 2.88E-11    |
| LINC01571 | CD1A     | -0.3579707   | 1.02E-14    |
| LINC01571 | C3       | -0.428989119 | 4.42E-21    |
| LINC01571 | NT5E     | -0.594918114 | 2.25E-43    |
| LINC01571 | CACNG4   | -0.591801093 | 7.86E-43    |
| LINC01571 | FHOD1    | -0.389587587 | 2.32E-17    |
| LINC01571 | LEMD1    | -0.417230103 | 6.42E-20    |
| LINC01571 | ATP11A   | -0.364069792 | 3.32E-15    |
| LINC01571 | PPAP2C   | -0.317170319 | 1.03E-11    |
| LINC01571 | DRAM1    | -0.628273408 | 1.37E-49    |
| LINC01571 | CDA      | -0.18369808  | 0.000108426 |
| LINC01571 | CCND2    | -0.155191065 | 0.001105791 |
| LINC01571 | LCN6     | 0.028556871  | 0.550675179 |
| LINC01571 | CDH4     | -0.318187292 | 8.73E-12    |
| LINC01571 | MMP11    | -0.542141756 | 6.61E-35    |
| LINC01571 | B3GAT1   | -0.256170806 | 5.23E-08    |
| LINC01571 | SPP1     | -0.317654693 | 9.50E-12    |
| LINC01571 | HLA-DQB1 | -0.376525087 | 3.11E-16    |
| LINC01571 | SDC3     | -0.466268482 | 4.44E-25    |
| LINC01571 | CX3CL1   | -0.511662637 | 1.16E-30    |
| LINC01571 | SDK1     | -0.409168926 | 3.78E-19    |
| LINC01571 | DOCK9    | -0.420668805 | 2.97E-20    |
| LINC01571 | CSF2     | -0.524837588 | 1.92E-32    |
| LINC01571 | GRHL3    | -0.652672249 | 1.23E-54    |
| LINC01571 | TMEM92   | -0.517216772 | 2.11E-31    |
| LINC01571 | BASP1    | -0.49727169  | 8.44E-29    |

|           |          |              |             |
|-----------|----------|--------------|-------------|
| LINC01571 | HRH1     | -0.617769368 | 1.50E-47    |
| LINC01571 | ESM1     | -0.217101741 | 4.42E-06    |
| LINC01571 | B4GALNT3 | -0.377540216 | 2.55E-16    |
| LINC01571 | LMO3     | -0.358924363 | 8.57E-15    |
| LINC01571 | C9orf16  | -0.415754145 | 8.91E-20    |
| LINC01571 | SEMA3F   | -0.163916608 | 0.000564771 |
| LINC01571 | PLA2G12B | -0.001063248 | 0.982277235 |
| LINC01571 | KLK6     | -0.344119354 | 1.20E-13    |
| LINC01571 | ST3GAL5  | -0.237775368 | 4.65E-07    |
| LINC01571 | FAM132B  | -0.077878853 | 0.103193125 |
| LINC01571 | CDKN1A   | -0.474340723 | 5.18E-26    |
| LINC01571 | E2F1     | -0.392443763 | 1.29E-17    |
| LINC01571 | B3GNT8   | -0.312350548 | 2.17E-11    |
| LINC01571 | MTMR11   | -0.512116375 | 1.01E-30    |
| LINC01571 | MYO1G    | -0.635117622 | 5.86E-51    |
| LINC01571 | TMSB10   | -0.438636604 | 4.54E-22    |
| LINC01571 | UNC5CL   | -0.543908623 | 3.63E-35    |
| LINC01571 | ABR      | -0.595936647 | 1.49E-43    |
| LINC01571 | PLP2     | -0.463828882 | 8.39E-25    |
| LINC01571 | SRCIN1   | -0.199687391 | 2.50E-05    |
| LINC01571 | PDE9A    | -0.530604574 | 3.01E-33    |
| LINC01571 | TREM2    | -0.314024085 | 1.68E-11    |
| LINC01571 | KDEL3    | -0.508243225 | 3.28E-30    |
| LINC01571 | PC       | -0.243099938 | 2.52E-07    |
| LINC01571 | C2CD4A   | -0.500028297 | 3.77E-29    |
| LINC01571 | PELI1    | -0.647400159 | 1.66E-53    |
| LINC01571 | SSX1     | -0.481531587 | 7.29E-27    |
| LINC01571 | MROH6    | -0.453035352 | 1.33E-23    |
| LINC01571 | ESPN     | -0.234968551 | 6.39E-07    |
| LINC01571 | BMP1     | -0.296882347 | 2.21E-10    |
| LINC01571 | TM4SF4   | -0.424296451 | 1.30E-20    |
| LINC01571 | CORO2A   | -0.405040753 | 9.22E-19    |
| LINC01571 | CD164L2  | -0.262857377 | 2.27E-08    |
| LINC01571 | CTSS     | -0.484835969 | 2.91E-27    |
| LINC01571 | CLU      | -0.347645041 | 6.46E-14    |
| LINC01571 | TMSB4X   | -0.537443682 | 3.18E-34    |
| LINC01571 | WNT10A   | -0.385370851 | 5.42E-17    |
| LINC01571 | NAPSA    | -0.543273334 | 4.51E-35    |
| LINC01571 | PLEKHA4  | -0.177143781 | 0.000191073 |
| LINC01571 | SFTPA1   | -0.191096619 | 5.58E-05    |
| LINC01571 | C1orf116 | -0.527429264 | 8.38E-33    |
| LINC01571 | TM4SF1   | -0.50575072  | 6.93E-30    |
| LINC01571 | SEL1L3   | -0.567280704 | 9.47E-39    |
| LINC01571 | VASN     | -0.364021851 | 3.35E-15    |
| LINC01571 | NPTXR    | -0.41413564  | 1.28E-19    |
| LINC01571 | PDE4C    | -0.586248029 | 7.08E-42    |
| LINC01571 | CDC42EP1 | -0.50016829  | 3.62E-29    |
| LINC01571 | ENDOD1   | -0.43201862  | 2.18E-21    |
| LINC01571 | RYR1     | -0.450222436 | 2.68E-23    |
| LINC01571 | IL1RAP   | -0.498795305 | 5.41E-29    |
| LINC01571 | SLC35F2  | -0.431213922 | 2.63E-21    |

|           |          |              |             |
|-----------|----------|--------------|-------------|
| LINC01571 | ISYNA1   | -0.236479401 | 5.39E-07    |
| LINC01571 | HLA-G    | -0.534861251 | 7.48E-34    |
| LINC01571 | CDKN2B   | -0.626412646 | 3.20E-49    |
| LINC01571 | ALDH1A3  | -0.659110525 | 4.79E-56    |
| LINC01571 | CLIP3    | -0.35028605  | 4.06E-14    |
| LINC01571 | ULBP2    | -0.393304715 | 1.08E-17    |
| LINC01571 | ETHE1    | -0.504665381 | 9.58E-30    |
| LINC01571 | XPR1     | -0.606643798 | 1.78E-45    |
| LINC01571 | SPTBN2   | -0.497629262 | 7.61E-29    |
| LINC01571 | IVL      | -0.589711916 | 1.81E-42    |
| LINC01571 | MARCO    | -0.479578772 | 1.25E-26    |
| LINC01571 | PLXND1   | -0.257178843 | 4.62E-08    |
| LINC01571 | EMILIN2  | -0.444920986 | 9.92E-23    |
| LINC01571 | PLAUR    | -0.626756885 | 2.74E-49    |
| LINC01571 | CDC42EP5 | -0.414341446 | 1.22E-19    |
| LINC01571 | TRPC5    | -0.015052426 | 0.753139817 |
| LINC01571 | TMEM100  | -0.351917746 | 3.03E-14    |
| LINC01571 | QSOX1    | -0.551702295 | 2.49E-36    |
| LINC01571 | ARHGAP23 | -0.456582418 | 5.42E-24    |
| LINC01571 | MDF1     | -0.511848728 | 1.10E-30    |
| LINC01571 | FSTL3    | -0.51821878  | 1.54E-31    |
| LINC01571 | INF2     | -0.288824999 | 7.00E-10    |
| LINC01571 | TGFBR1   | -0.302348612 | 9.87E-11    |
| LINC01571 | TGFBI    | -0.343559278 | 1.32E-13    |
| LINC01571 | ERBB3    | -0.479843582 | 1.16E-26    |
| LINC01571 | CCL18    | -0.425764166 | 9.30E-21    |
| LINC01571 | CCL17    | -0.458878708 | 3.01E-24    |
| LINC01571 | C16orf45 | -0.214008554 | 6.08E-06    |
| LINC01571 | PRDM1    | -0.246878907 | 1.61E-07    |
| LINC01571 | TRIM47   | -0.528335178 | 6.26E-33    |
| LINC01571 | CNFN     | -0.387498183 | 3.54E-17    |
| LINC01571 | ARMCX3   | -0.027286363 | 0.568549549 |
| LINC01571 | RAMP1    | -0.074080735 | 0.121173059 |
| LINC01571 | GABRD    | -0.055816071 | 0.243189282 |
| LINC01571 | COL13A1  | -0.150014574 | 0.001621297 |
| LINC01571 | S100A5   | -0.296819655 | 2.23E-10    |
| LINC01571 | MISP     | -0.610510848 | 3.46E-46    |
| LINC01571 | HES6     | -0.174465185 | 0.000239496 |
| LINC01571 | PSD3     | -0.404488156 | 1.04E-18    |
| LINC01571 | DOK7     | -0.462324982 | 1.24E-24    |
| LINC01571 | ZMAT3    | -0.605935037 | 2.40E-45    |
| LINC01571 | MFAP2    | -0.284862918 | 1.22E-09    |
| LINC01571 | TMEM79   | -0.340516585 | 2.22E-13    |
| LINC01571 | SLC1A5   | -0.345073532 | 1.01E-13    |
| LINC01571 | BBC3     | -0.534685799 | 7.92E-34    |
| LINC01571 | HLA-DQB2 | -0.372809093 | 6.36E-16    |
| LINC01571 | C1QL1    | -0.131202985 | 0.005903739 |
| LINC01571 | TMEM215  | -0.016791192 | 0.725711229 |
| LINC01571 | PNP      | -0.479395944 | 1.31E-26    |
| LINC01571 | ARNTL    | -0.356318388 | 1.38E-14    |
| LINC01571 | CLDN2    | -0.047622561 | 0.319481702 |

|           |           |              |             |
|-----------|-----------|--------------|-------------|
| LINC01571 | MVP       | -0.569798598 | 3.74E-39    |
| LINC01571 | LGALS1    | -0.479439062 | 1.30E-26    |
| LINC01571 | BIRC7     | -0.354979696 | 1.75E-14    |
| LINC01571 | COL8A1    | -0.419272276 | 4.06E-20    |
| LINC01571 | PERP      | -0.629664406 | 7.28E-50    |
| LINC01571 | GJA4      | -0.189384902 | 6.53E-05    |
| LINC01571 | IGFL2     | -0.488670353 | 9.93E-28    |
| LINC01571 | DAPK2     | -0.267600901 | 1.23E-08    |
| LINC01571 | MAMLD1    | -0.43462956  | 1.18E-21    |
| LINC01571 | ETV5      | -0.194652736 | 4.02E-05    |
| LINC01571 | RUNX1     | -0.753669294 | 1.13E-81    |
| LINC01571 | LONRF2    | -0.076588276 | 0.109049106 |
| LINC01571 | SPOCK1    | -0.155490342 | 0.001081205 |
| LINC01571 | XKRX      | -0.451712011 | 1.85E-23    |
| LINC01571 | TGFB1     | -0.346895857 | 7.37E-14    |
| LINC01571 | ERP27     | -0.24800935  | 1.41E-07    |
| LINC01571 | TNFRSF10C | -0.504629071 | 9.69E-30    |
| LINC01571 | PALM      | -0.377967714 | 2.34E-16    |
| LINC01571 | TSC22D1   | -0.126892126 | 0.007770719 |
| LINC01571 | TGM2      | -0.645994552 | 3.30E-53    |
| LINC01571 | UBE2QL1   | -0.026670648 | 0.577310157 |
| LINC01571 | ECE1      | -0.475944335 | 3.36E-26    |
| LINC01571 | COL8A2    | -0.543802387 | 3.77E-35    |
| LINC01571 | HIST3H2A  | -0.405269962 | 8.77E-19    |
| LINC01571 | TNFRSF21  | -0.662874317 | 6.90E-57    |
| LINC01571 | SOX4      | -0.635201022 | 5.64E-51    |
| LINC01571 | ELF3      | -0.635518454 | 4.86E-51    |
| LINC01571 | TPD52L1   | -0.235840566 | 5.79E-07    |
| LINC01571 | INHBB     | -0.228549282 | 1.30E-06    |
| LINC01571 | HPN       | -0.220544698 | 3.08E-06    |
| LINC01571 | MMP7      | -0.515332281 | 3.78E-31    |
| LINC01571 | RAB27A    | -0.315890238 | 1.25E-11    |
| LINC01571 | IGF2BP2   | -0.318525574 | 8.28E-12    |
| LINC01571 | ITGB4     | -0.613734808 | 8.66E-47    |
| LINC01571 | PPP1R1B   | -0.344575683 | 1.10E-13    |
| LINC01571 | NPDC1     | -0.171730563 | 0.000300596 |
| LINC01571 | CCL13     | -0.507724919 | 3.84E-30    |
| LINC01571 | SPINT1    | -0.539644286 | 1.53E-34    |
| LINC01571 | HEY2      | -0.104932602 | 0.027921611 |
| LINC01571 | CST2      | -0.656265875 | 2.03E-55    |
| LINC01571 | ADM       | -0.202957023 | 1.83E-05    |
| LINC01571 | VSTM2L    | -0.628559494 | 1.21E-49    |
| LINC01571 | FAM84A    | -0.616378087 | 2.75E-47    |
| LINC01571 | P4HA2     | -0.31211907  | 2.25E-11    |
| LINC01571 | LPL       | -0.408074794 | 4.80E-19    |
| LINC01571 | TMEM173   | -0.557990081 | 2.72E-37    |
| LINC01571 | DHRS3     | -0.301589357 | 1.11E-10    |
| LINC01571 | SCN1B     | -0.417450944 | 6.11E-20    |
| LINC01571 | GLT1D1    | -0.152354888 | 0.001365722 |
| LINC01571 | PHYHIP    | -0.281133875 | 2.04E-09    |
| LINC01571 | BHLHE40   | -0.531348936 | 2.36E-33    |



|           |            |              |             |
|-----------|------------|--------------|-------------|
| LINC01571 | BID        | -0.39219257  | 1.36E-17    |
| LINC01571 | POSTN      | -0.46615175  | 4.57E-25    |
| LINC01571 | ITGA3      | -0.617296767 | 1.84E-47    |
| LINC01571 | RSPO4      | -0.353686598 | 2.21E-14    |
| LINC01571 | ADAMTS9    | -0.031378367 | 0.511993472 |
| LINC01571 | ABTB2      | -0.541925313 | 7.11E-35    |
| LINC01571 | KCNQ3      | -0.652703028 | 1.21E-54    |
| LINC01571 | ANXA1      | -0.321783717 | 4.93E-12    |
| LINC01571 | S100A11    | -0.591202404 | 9.99E-43    |
| LINC01571 | CEACAM6    | -0.690757918 | 1.61E-63    |
| LINC01571 | IER5L      | -0.32586097  | 2.56E-12    |
| LINC01571 | KRT80      | -0.564451335 | 2.66E-38    |
| LINC01571 | CDH6       | -0.688327292 | 6.53E-63    |
| LINC01571 | UNC5B      | -0.397547351 | 4.49E-18    |
| LINC01571 | PLEKHN1    | -0.527485715 | 8.23E-33    |
| LINC01571 | SYTL1      | -0.445220546 | 9.22E-23    |
| LINC01571 | TMEM163    | -0.597309631 | 8.52E-44    |
| LINC01571 | C4orf48    | -0.185732167 | 9.06E-05    |
| LINC01571 | B3GNT7     | -0.257391883 | 4.50E-08    |
| LINC01571 | BAIAP3     | -0.261797631 | 2.59E-08    |
| LINC01571 | PHLDA2     | -0.398878209 | 3.40E-18    |
| LINC01571 | GAP43      | -0.441023492 | 2.56E-22    |
| LINC01571 | S100A1     | -0.364063552 | 3.32E-15    |
| LINC01571 | PTPRE      | -0.561477433 | 7.81E-38    |
| LINC01571 | CCND1      | -0.582311053 | 3.28E-41    |
| LINC01571 | ST6GALNAC5 | -0.685264378 | 3.74E-62    |
| LINC01571 | KRT17      | -0.396251526 | 5.89E-18    |
| LINC01571 | HPCAL4     | -0.119657009 | 0.012108549 |
| LINC01571 | GABBR2     | -0.198336249 | 2.85E-05    |
| LINC01571 | DIRAS3     | -0.045453869 | 0.342041042 |
| LINC01571 | SERINC2    | -0.43179395  | 2.30E-21    |
| LINC01571 | PTCHD4     | -0.486342138 | 1.91E-27    |
| LINC01571 | EPS8       | -0.25168336  | 9.06E-08    |
| LINC01571 | LY6E       | -0.345906117 | 8.76E-14    |
| LINC01571 | UPP1       | -0.613035976 | 1.17E-46    |
| LINC01571 | AHNAK2     | -0.67480141  | 1.23E-59    |
| LINC01571 | PLXNC1     | -0.163366138 | 0.000589817 |
| LINC01571 | TNC        | -0.550978074 | 3.21E-36    |
| LINC01571 | DUSP4      | -0.413630842 | 1.43E-19    |
| LINC01571 | NRCAM      | -0.368925874 | 1.33E-15    |
| LINC01571 | NRP2       | -0.301374616 | 1.14E-10    |
| LINC01571 | CTSC       | -0.565024215 | 2.16E-38    |
| LINC01571 | AMIGO2     | -0.326775253 | 2.21E-12    |
| LINC01571 | NAB2       | -0.16204691  | 0.000654094 |
| LINC01571 | TBC1D2     | -0.630468907 | 5.04E-50    |
| LINC01571 | PHLDA3     | -0.514426052 | 4.99E-31    |
| LINC01571 | PTP4A3     | -0.404468582 | 1.04E-18    |
| LINC01571 | CRABP2     | -0.177060381 | 0.000192431 |
| LINC01571 | GOS2       | -0.170808763 | 0.000324278 |
| LINC01571 | S100A6     | -0.545850942 | 1.88E-35    |
| LINC01571 | FOXQ1      | -0.541782057 | 7.46E-35    |

|           |         |              |             |
|-----------|---------|--------------|-------------|
| LINC01571 | LRG1    | -0.426573064 | 7.72E-21    |
| LINC01571 | LAMP5   | -0.365629293 | 2.48E-15    |
| LINC01571 | ALDH3B1 | -0.657414009 | 1.14E-55    |
| LINC01571 | CDH2    | -0.007077394 | 0.882447778 |
| LINC01571 | SCG5    | -0.004590704 | 0.923590309 |
| LINC01571 | ZCCHC16 | 0.019759608  | 0.679702084 |
| LINC01571 | GRB7    | -0.460256995 | 2.12E-24    |
| LINC01571 | TIAM1   | -0.444660715 | 1.06E-22    |
| LINC01571 | FXYD5   | -0.345812788 | 8.91E-14    |
| LINC01571 | CLDN9   | -0.23629558  | 5.50E-07    |
| LINC01571 | FAM43A  | -0.276435659 | 3.85E-09    |
| LINC01571 | CHST2   | -0.410291851 | 2.96E-19    |
| LINC01571 | HMGA2   | -0.310519004 | 2.88E-11    |
| LINC01571 | GALNT7  | -0.284111039 | 1.35E-09    |
| LINC01571 | CBLN1   | -0.458372687 | 3.43E-24    |
| LINC01571 | STRA6   | -0.488674652 | 9.92E-28    |
| LINC01571 | MUC21   | -0.561735082 | 7.12E-38    |
| LINC01571 | PRR36   | -0.35846013  | 9.33E-15    |
| LINC01571 | NFE2L3  | -0.667072558 | 7.70E-58    |
| LINC01571 | NR1D1   | -0.33247101  | 8.64E-13    |
| LINC01571 | MUC1    | -0.65192576  | 1.79E-54    |
| LINC01571 | NAT8L   | -0.060399399 | 0.206570052 |
| LINC01571 | APOC1   | -0.146490486 | 0.002089677 |
| LINC01571 | EVA1A   | -0.611393501 | 2.37E-46    |
| LINC01571 | ENTPD1  | -0.212821802 | 6.86E-06    |
| LINC01571 | COL1A1  | -0.500974067 | 2.86E-29    |
| LINC01571 | FNDC4   | -0.50891752  | 2.68E-30    |
| LINC01571 | FRMD3   | 0.007268449  | 0.879298364 |
| LINC01571 | SHROOM4 | -0.395710984 | 6.59E-18    |
| LINC01571 | NELL2   | -0.16659407  | 0.000456426 |
| LINC01571 | EPHB3   | -0.613641054 | 9.02E-47    |
| LINC01571 | TMC6    | -0.463287206 | 9.66E-25    |
| LINC01571 | NOD1    | -0.30288731  | 9.11E-11    |
| LINC01571 | GGCT    | -0.282971518 | 1.58E-09    |
| LINC01571 | ICAM1   | -0.596268121 | 1.30E-43    |
| LINC01571 | PRSS23  | -0.531055049 | 2.60E-33    |
| LINC01571 | CFI     | -0.58056064  | 6.44E-41    |
| LINC01571 | CD55    | -0.682677206 | 1.60E-61    |
| LINC01571 | RASD2   | -0.345329406 | 9.69E-14    |
| LINC01571 | KLK11   | -0.218755029 | 3.72E-06    |
| LINC01571 | ICAM5   | -0.364382402 | 3.13E-15    |
| LINC01571 | ADORA1  | -0.348025165 | 6.04E-14    |
| LINC01571 | ITGA2   | -0.649691398 | 5.40E-54    |
| LINC01571 | ABCC3   | -0.348282741 | 5.78E-14    |
| LINC01571 | MFGE8   | -0.376199003 | 3.31E-16    |
| LINC01571 | STK32A  | -0.342161472 | 1.68E-13    |
| LINC01571 | CYSLTR2 | -0.356372144 | 1.36E-14    |
| LINC01571 | LAD1    | -0.384320603 | 6.69E-17    |
| LINC01571 | MGAT3   | -0.60936764  | 5.63E-46    |
| LINC01571 | IGFBP6  | -0.259319734 | 3.54E-08    |
| LINC01571 | CYP2S1  | -0.670439915 | 1.29E-58    |

|           |           |              |             |
|-----------|-----------|--------------|-------------|
| LINC01571 | KCNJ2     | -0.400877121 | 2.23E-18    |
| LINC01571 | FAM20A    | -0.518068007 | 1.62E-31    |
| LINC01571 | TGFA      | -0.291670679 | 4.67E-10    |
| LINC01571 | MXRA8     | -0.394840954 | 7.89E-18    |
| LINC01571 | C8orf4    | -0.541443492 | 8.36E-35    |
| LINC01571 | CLDN10    | -0.44958487  | 3.14E-23    |
| LINC01571 | PDE5A     | -0.310432909 | 2.92E-11    |
| LINC01571 | APOE      | -0.060599674 | 0.205066271 |
| LINC01571 | SPOCK2    | -0.586832966 | 5.63E-42    |
| LINC01571 | TENM1     | -0.088917619 | 0.062686618 |
| LINC01571 | SLIT1     | -0.181816609 | 0.000127834 |
| LINC01571 | CXCL14    | -0.363132532 | 3.95E-15    |
| LINC01571 | ECM1      | -0.234700337 | 6.59E-07    |
| LINC01571 | DUSP5     | -0.549443679 | 5.46E-36    |
| LINC01571 | SEZ6L2    | -0.422491697 | 1.96E-20    |
| LINC01571 | THRSP     | -0.070801458 | 0.13858393  |
| LINC01571 | C19orf33  | -0.59960243  | 3.33E-44    |
| LINC01571 | MPZL2     | -0.493767459 | 2.32E-28    |
| LINC01571 | CTSH      | -0.278912988 | 2.75E-09    |
| LINC01571 | CYP1B1    | -0.301410926 | 1.13E-10    |
| LINC01571 | ALOX5     | -0.628103204 | 1.48E-49    |
| LINC01571 | SYTL5     | -0.559145862 | 1.80E-37    |
| LINC01571 | TNFRSF12A | -0.311513992 | 2.47E-11    |
| LINC01571 | DUSP6     | -0.461812524 | 1.42E-24    |
| LINC01571 | ALOX15B   | -0.534553039 | 8.27E-34    |
| LINC01571 | SDC4      | -0.360405428 | 6.53E-15    |
| LINC01571 | MDK       | -0.372805264 | 6.37E-16    |
| LINC01571 | KRT19     | -0.648590315 | 9.28E-54    |
| LINC01571 | MET       | -0.571956652 | 1.68E-39    |
| LINC01571 | TESC      | -0.035104006 | 0.463168351 |
| LINC01571 | CXCL17    | -0.439212408 | 3.96E-22    |
| LINC01571 | NPC2      | -0.151993629 | 0.00140259  |
| LINC01571 | COMP      | -0.441179887 | 2.46E-22    |
| LINC01571 | TUSC3     | -0.380381216 | 1.46E-16    |
| LINC01571 | TMPRSS4   | -0.696089618 | 7.12E-65    |
| LINC01571 | LGALS3    | -0.539305437 | 1.71E-34    |
| LINC01571 | CRLF1     | -0.463082818 | 1.02E-24    |
| LINC01571 | CTXN1     | -0.410157248 | 3.05E-19    |
| LINC01571 | PCSK1N    | -0.333266575 | 7.57E-13    |
| LINC01571 | NMU       | -0.447550286 | 5.20E-23    |
| LINC01571 | GALE      | -0.350232152 | 4.09E-14    |
| LINC01571 | PCSK2     | -0.299512009 | 1.50E-10    |
| LINC01571 | GJB3      | -0.2890891   | 6.74E-10    |
| LINC01571 | SLPI      | -0.644186269 | 7.92E-53    |
| LINC01571 | AGR2      | -0.378443578 | 2.14E-16    |
| LINC01571 | MRC2      | -0.474037191 | 5.62E-26    |
| LINC01571 | GOLT1A    | -0.19495102  | 3.91E-05    |
| LINC01571 | SLC27A6   | -0.556180825 | 5.17E-37    |
| LINC01571 | KCNN4     | -0.601469292 | 1.54E-44    |
| LINC01571 | ETV4      | -0.402239908 | 1.67E-18    |
| LINC01571 | SYT12     | -0.345823567 | 8.89E-14    |

|           |          |              |             |
|-----------|----------|--------------|-------------|
| LINC01571 | PVRL4    | -0.485913223 | 2.16E-27    |
| LINC01571 | PLCD3    | -0.362795243 | 4.20E-15    |
| LINC01571 | PLAU     | -0.556893112 | 4.02E-37    |
| LINC01571 | LRRK2    | -0.173642387 | 0.000256534 |
| LINC01571 | SFN      | -0.573606502 | 9.04E-40    |
| LINC01571 | LPAR5    | -0.374313277 | 4.77E-16    |
| LINC01571 | NGEF     | -0.498303414 | 6.25E-29    |
| LINC01571 | DTX4     | -0.469400958 | 1.94E-25    |
| LINC01571 | CST6     | -0.3663494   | 2.17E-15    |
| LINC01571 | QPCT     | -0.211562713 | 7.79E-06    |
| LINC01571 | TIMP1    | -0.288824999 | 7.00E-10    |
| LINC01571 | CAMK2N1  | -0.307346105 | 4.67E-11    |
| LINC01571 | KLHDC8A  | -0.244810353 | 2.06E-07    |
| LINC01571 | PDLIM4   | -0.402326982 | 1.64E-18    |
| LINC01571 | SCEL     | -0.528229368 | 6.48E-33    |
| LINC01571 | LCN2     | -0.620009404 | 5.59E-48    |
| LINC01571 | PROS1    | -0.480133497 | 1.07E-26    |
| LINC01571 | GABRB2   | -0.465318456 | 5.69E-25    |
| LINC01571 | TMPRSS6  | -0.522644243 | 3.85E-32    |
| LINC01571 | KLK7     | -0.318631024 | 8.14E-12    |
| LINC01571 | PDZK1IP1 | -0.49885275  | 5.32E-29    |
| LINC01571 | CDH3     | -0.371167611 | 8.71E-16    |
| LINC01571 | LRP4     | -0.192035272 | 5.12E-05    |
| LINC01571 | IGSF1    | -0.452404177 | 1.56E-23    |
| LINC01571 | B3GNT3   | -0.69172557  | 9.19E-64    |
| LINC01571 | CLDN1    | -0.599810505 | 3.06E-44    |
| LINC01571 | GDF15    | -0.526386902 | 1.17E-32    |
| LINC01571 | ARHGAP36 | -0.40662638  | 6.56E-19    |
| LINC01571 | LAMB3    | -0.583931969 | 1.75E-41    |
| LINC01571 | KLK10    | -0.314321234 | 1.60E-11    |
| LINC01571 | DPP4     | -0.607896221 | 1.05E-45    |
| LINC01571 | METTL7B  | -0.146516584 | 0.002085795 |
| LINC01571 | LIPH     | -0.589001374 | 2.39E-42    |
| LINC01571 | CLDN16   | -0.56982186  | 3.71E-39    |
| LINC01571 | CHI3L1   | -0.367368075 | 1.79E-15    |
| LINC01571 | SLC22A31 | -0.429302448 | 4.11E-21    |
| LINC01571 | TACSTD2  | -0.417242018 | 6.40E-20    |
| LINC01571 | SFTPB    | -0.574299235 | 6.97E-40    |
| LINC01571 | RXRG     | -0.057186361 | 0.231794182 |
| LINC01571 | DCSTAMP  | -0.335564968 | 5.15E-13    |
| LINC01571 | CITED1   | -0.07103705  | 0.137272309 |
| LINC01571 | SERPINA1 | -0.484884619 | 2.88E-27    |
| LINC01571 | PRR15    | -0.182347364 | 0.000122052 |
| LINC01571 | SLC34A2  | -0.537916283 | 2.72E-34    |
| LINC01571 | FN1      | -0.663758814 | 4.36E-57    |
| LINC01571 | ZCCHC12  | -0.249200783 | 1.22E-07    |
| PTCSC3    | TFF3     | 0.492122312  | 3.72E-28    |
| PTCSC3    | CCL21    | 0.284823751  | 1.22E-09    |
| PTCSC3    | TPO      | 0.489475986  | 7.91E-28    |
| PTCSC3    | MT1G     | 0.392369815  | 1.31E-17    |
| PTCSC3    | DIO1     | 0.391352984  | 1.62E-17    |

|        |           |             |          |
|--------|-----------|-------------|----------|
| PTCSC3 | DPT       | 0.281918571 | 1.83E-09 |
| PTCSC3 | CDH16     | 0.556368649 | 4.84E-37 |
| PTCSC3 | CRABP1    | 0.62672861  | 2.77E-49 |
| PTCSC3 | SLC26A7   | 0.595095577 | 2.09E-43 |
| PTCSC3 | MT1H      | 0.366041419 | 2.30E-15 |
| PTCSC3 | SLC26A4   | 0.588909492 | 2.48E-42 |
| PTCSC3 | SLC5A8    | 0.545607672 | 2.04E-35 |
| PTCSC3 | PKHD1L1   | 0.486493962 | 1.83E-27 |
| PTCSC3 | TFCP2L1   | 0.518244741 | 1.53E-31 |
| PTCSC3 | WSCD2     | 0.512808142 | 8.20E-31 |
| PTCSC3 | IPCEF1    | 0.52442189  | 2.19E-32 |
| PTCSC3 | SLC5A5    | 0.406220734 | 7.15E-19 |
| PTCSC3 | MT1F      | 0.399085874 | 3.26E-18 |
| PTCSC3 | FOSB      | 0.327835194 | 1.86E-12 |
| PTCSC3 | SEMA3D    | 0.457748595 | 4.02E-24 |
| PTCSC3 | BMP8A     | 0.449436639 | 3.26E-23 |
| PTCSC3 | MATN2     | 0.59221529  | 6.66E-43 |
| PTCSC3 | PLA2R1    | 0.547922105 | 9.22E-36 |
| PTCSC3 | COL23A1   | 0.618779825 | 9.61E-48 |
| PTCSC3 | HGD       | 0.526898509 | 9.94E-33 |
| PTCSC3 | TCEAL2    | 0.43689157  | 6.89E-22 |
| PTCSC3 | CHRD1     | 0.284885926 | 1.21E-09 |
| PTCSC3 | TNFRSF11B | 0.437607493 | 5.81E-22 |
| PTCSC3 | FAM167A   | 0.538443768 | 2.28E-34 |
| PTCSC3 | KIT       | 0.609927061 | 4.44E-46 |
| PTCSC3 | SLC4A4    | 0.555648471 | 6.24E-37 |
| PTCSC3 | SMOC2     | 0.423287828 | 1.64E-20 |
| PTCSC3 | FHL1      | 0.539974262 | 1.37E-34 |
| PTCSC3 | OTOS      | 0.445482149 | 8.65E-23 |
| PTCSC3 | IGFBPL1   | 0.532102305 | 1.85E-33 |
| PTCSC3 | HBB       | 0.228508562 | 1.31E-06 |
| PTCSC3 | BEX1      | 0.381737135 | 1.12E-16 |
| PTCSC3 | FABP4     | 0.402065575 | 1.74E-18 |
| PTCSC3 | LMOD1     | 0.568453031 | 6.15E-39 |
| PTCSC3 | SOD3      | 0.299983558 | 1.40E-10 |
| PTCSC3 | TMEM171   | 0.500285181 | 3.50E-29 |
| PTCSC3 | PI16      | 0.333320887 | 7.50E-13 |
| PTCSC3 | ZMAT4     | 0.450172811 | 2.72E-23 |
| PTCSC3 | MFAP4     | 0.250405521 | 1.06E-07 |
| PTCSC3 | CWH43     | 0.454116997 | 1.01E-23 |
| PTCSC3 | SPX       | 0.570400738 | 2.99E-39 |
| PTCSC3 | APOD      | 0.236592144 | 5.32E-07 |
| PTCSC3 | DPP6      | 0.531076038 | 2.58E-33 |
| PTCSC3 | MMRN1     | 0.380086789 | 1.55E-16 |
| PTCSC3 | WDR72     | 0.648927025 | 7.87E-54 |
| PTCSC3 | MPPED2    | 0.560040103 | 1.31E-37 |
| PTCSC3 | PAPSS2    | 0.422760265 | 1.85E-20 |
| PTCSC3 | DCN       | 0.207482129 | 1.17E-05 |
| PTCSC3 | SORBS2    | 0.548448818 | 7.69E-36 |
| PTCSC3 | EGR2      | 0.455770518 | 6.66E-24 |
| PTCSC3 | EDN3      | 0.461383614 | 1.58E-24 |

|        |            |             |             |
|--------|------------|-------------|-------------|
| PTCSC3 | DIO2       | 0.544530212 | 2.94E-35    |
| PTCSC3 | ITPR1      | 0.470484206 | 1.46E-25    |
| PTCSC3 | CFD        | 0.191161426 | 5.55E-05    |
| PTCSC3 | CPXM1      | 0.330230043 | 1.25E-12    |
| PTCSC3 | ELM01      | 0.43609097  | 8.34E-22    |
| PTCSC3 | GPC3       | 0.349324525 | 4.81E-14    |
| PTCSC3 | MYOC       | 0.317415365 | 9.86E-12    |
| PTCSC3 | DEPTOR     | 0.477352315 | 2.29E-26    |
| PTCSC3 | DGKI       | 0.505053746 | 8.54E-30    |
| PTCSC3 | CARTPT     | 0.479721678 | 1.20E-26    |
| PTCSC3 | IYD        | 0.504552493 | 9.91E-30    |
| PTCSC3 | LYVE1      | 0.362920383 | 4.11E-15    |
| PTCSC3 | CLCNKB     | 0.543739257 | 3.85E-35    |
| PTCSC3 | NCAM1      | 0.266421345 | 1.44E-08    |
| PTCSC3 | HBA2       | 0.158003237 | 0.000893788 |
| PTCSC3 | GLT8D2     | 0.480730095 | 9.09E-27    |
| PTCSC3 | OGDHL      | 0.488768431 | 9.66E-28    |
| PTCSC3 | LIFR       | 0.478115257 | 1.86E-26    |
| PTCSC3 | CSGALNACT1 | 0.53563362  | 5.80E-34    |
| PTCSC3 | RAP1GAP    | 0.586997953 | 5.28E-42    |
| PTCSC3 | COL9A3     | 0.389175997 | 2.52E-17    |
| PTCSC3 | FBLN1      | 0.13598061  | 0.004313779 |
| PTCSC3 | EFEMP1     | 0.359246092 | 8.08E-15    |
| PTCSC3 | AOX1       | 0.384416878 | 6.56E-17    |
| PTCSC3 | GRIN2C     | 0.461415778 | 1.57E-24    |
| PTCSC3 | C11orf74   | 0.527143887 | 9.18E-33    |
| PTCSC3 | PPARGC1A   | 0.528071644 | 6.82E-33    |
| PTCSC3 | ANGPTL1    | 0.532551711 | 1.59E-33    |
| PTCSC3 | SCARA5     | 0.285529659 | 1.11E-09    |
| PTCSC3 | LTF        | 0.367306696 | 1.81E-15    |
| PTCSC3 | CA4        | 0.473078008 | 7.28E-26    |
| PTCSC3 | TG         | 0.565500762 | 1.82E-38    |
| PTCSC3 | FCGBP      | 0.399334514 | 3.09E-18    |
| PTCSC3 | PBX4       | 0.518411258 | 1.45E-31    |
| PTCSC3 | CYR61      | 0.374350896 | 4.73E-16    |
| PTCSC3 | FOS        | 0.314996735 | 1.44E-11    |
| PTCSC3 | KHDRBS2    | 0.462578488 | 1.16E-24    |
| PTCSC3 | MUM1L1     | 0.37178336  | 7.74E-16    |
| PTCSC3 | RGS16      | 0.501006778 | 2.83E-29    |
| PTCSC3 | MT1M       | 0.276039463 | 4.06E-09    |
| PTCSC3 | LRP2       | 0.543246232 | 4.55E-35    |
| PTCSC3 | MAFB       | 0.456449351 | 5.60E-24    |
| PTCSC3 | KCNK2      | 0.421763504 | 2.32E-20    |
| PTCSC3 | TBC1D4     | 0.490972439 | 5.17E-28    |
| PTCSC3 | MIOX       | 0.480574233 | 9.49E-27    |
| PTCSC3 | TPPP       | 0.532462212 | 1.64E-33    |
| PTCSC3 | FMOD       | 0.434439135 | 1.23E-21    |
| PTCSC3 | CITED2     | 0.376396542 | 3.18E-16    |
| PTCSC3 | RGS8       | 0.538034114 | 2.62E-34    |
| PTCSC3 | ABI3BP     | 0.4573364   | 4.47E-24    |
| PTCSC3 | ADH1B      | 0.290550405 | 5.48E-10    |

|        |          |             |             |
|--------|----------|-------------|-------------|
| PTCSC3 | OGN      | 0.249817569 | 1.14E-07    |
| PTCSC3 | NR4A1    | 0.291603323 | 4.72E-10    |
| PTCSC3 | FOXJ1    | 0.49688894  | 9.43E-29    |
| PTCSC3 | ALDH1A1  | 0.559377511 | 1.66E-37    |
| PTCSC3 | OCA2     | 0.453080153 | 1.31E-23    |
| PTCSC3 | TMEM139  | 0.412260203 | 1.93E-19    |
| PTCSC3 | ARHGAP24 | 0.509194114 | 2.46E-30    |
| PTCSC3 | SLC25A15 | 0.500737642 | 3.06E-29    |
| PTCSC3 | DES      | 0.214336771 | 5.88E-06    |
| PTCSC3 | GDF10    | 0.379273406 | 1.82E-16    |
| PTCSC3 | KIAA1324 | 0.414784337 | 1.10E-19    |
| PTCSC3 | JUN      | 0.404994171 | 9.31E-19    |
| PTCSC3 | C7       | 0.160205045 | 0.000754736 |
| PTCSC3 | LGI3     | 0.413933385 | 1.33E-19    |
| PTCSC3 | CDON     | 0.52144558  | 5.62E-32    |
| PTCSC3 | BCL2     | 0.553795936 | 1.20E-36    |
| PTCSC3 | HLF      | 0.500386737 | 3.40E-29    |
| PTCSC3 | EGR1     | 0.410609077 | 2.77E-19    |
| PTCSC3 | IP6K3    | 0.438659428 | 4.52E-22    |
| PTCSC3 | SCUBE3   | 0.469196821 | 2.05E-25    |
| PTCSC3 | PKNOX2   | 0.469083635 | 2.11E-25    |
| PTCSC3 | SMAD9    | 0.477223669 | 2.37E-26    |
| PTCSC3 | IQGAP2   | 0.419799131 | 3.61E-20    |
| PTCSC3 | GNA14    | 0.411708032 | 2.17E-19    |
| PTCSC3 | LAYN     | 0.417732989 | 5.74E-20    |
| PTCSC3 | AVPR1A   | 0.554524199 | 9.28E-37    |
| PTCSC3 | PDLIM3   | 0.327104449 | 2.09E-12    |
| PTCSC3 | GPM6A    | 0.59315872  | 4.57E-43    |
| PTCSC3 | SDPR     | 0.506575375 | 5.42E-30    |
| PTCSC3 | CRYAB    | 0.336888729 | 4.12E-13    |
| PTCSC3 | FOXA2    | 0.410080768 | 3.10E-19    |
| PTCSC3 | C8orf88  | 0.57298416  | 1.14E-39    |
| PTCSC3 | ISM1     | 0.344866785 | 1.05E-13    |
| PTCSC3 | BMP2     | 0.359461542 | 7.77E-15    |
| PTCSC3 | ID4      | 0.518627985 | 1.36E-31    |
| PTCSC3 | NUPR1    | 0.296808675 | 2.23E-10    |
| PTCSC3 | SERTM1   | 0.368239469 | 1.52E-15    |
| PTCSC3 | IRS1     | 0.557566038 | 3.17E-37    |
| PTCSC3 | FIBIN    | 0.311270531 | 2.56E-11    |
| PTCSC3 | PODN     | 0.204827079 | 1.52E-05    |
| PTCSC3 | TDRD9    | 0.400732958 | 2.30E-18    |
| PTCSC3 | EPHA3    | 0.394885438 | 7.82E-18    |
| PTCSC3 | AIF1L    | 0.425588497 | 9.68E-21    |
| PTCSC3 | EBF4     | 0.334336867 | 6.33E-13    |
| PTCSC3 | ADM2     | 0.401829926 | 1.83E-18    |
| PTCSC3 | GSTM3    | 0.447537865 | 5.22E-23    |
| PTCSC3 | HSD17B6  | 0.428775861 | 4.64E-21    |
| PTCSC3 | AGR3     | 0.380419293 | 1.45E-16    |
| PTCSC3 | EPHB1    | 0.455396281 | 7.32E-24    |
| PTCSC3 | TMOD1    | 0.380784841 | 1.35E-16    |
| PTCSC3 | WASF3    | 0.560997291 | 9.29E-38    |

|        |          |             |             |
|--------|----------|-------------|-------------|
| PTCSC3 | SELV     | 0.398367217 | 3.79E-18    |
| PTCSC3 | ENPP1    | 0.490147017 | 6.54E-28    |
| PTCSC3 | SYNE1    | 0.55631938  | 4.93E-37    |
| PTCSC3 | PLCH1    | 0.545809654 | 1.90E-35    |
| PTCSC3 | CCDC146  | 0.558004031 | 2.71E-37    |
| PTCSC3 | SLC16A2  | 0.535724395 | 5.62E-34    |
| PTCSC3 | IER2     | 0.316427304 | 1.15E-11    |
| PTCSC3 | KCNAB1   | 0.442058626 | 1.99E-22    |
| PTCSC3 | SYNDIG1  | 0.395396761 | 7.03E-18    |
| PTCSC3 | C16orf89 | 0.488375826 | 1.08E-27    |
| PTCSC3 | CTGF     | 0.253974285 | 6.86E-08    |
| PTCSC3 | NR4A3    | 0.211942978 | 7.50E-06    |
| PTCSC3 | KIAA1456 | 0.585794039 | 8.46E-42    |
| PTCSC3 | AQP4     | 0.510430366 | 1.69E-30    |
| PTCSC3 | RNF150   | 0.44517422  | 9.33E-23    |
| PTCSC3 | C1S      | 0.097254604 | 0.041677021 |
| PTCSC3 | PFKFB2   | 0.518950452 | 1.23E-31    |
| PTCSC3 | PROX1    | 0.541668648 | 7.75E-35    |
| PTCSC3 | TCF7L1   | 0.466652618 | 4.01E-25    |
| PTCSC3 | HSPB6    | 0.26470696  | 1.79E-08    |
| PTCSC3 | FHDC1    | 0.563415401 | 3.88E-38    |
| PTCSC3 | PRR15L   | 0.485316541 | 2.55E-27    |
| PTCSC3 | SLC1A1   | 0.508609745 | 2.94E-30    |
| PTCSC3 | BTBD11   | 0.550278729 | 4.09E-36    |
| PTCSC3 | TRIM58   | 0.497663464 | 7.53E-29    |
| PTCSC3 | LRIG1    | 0.540548986 | 1.13E-34    |
| PTCSC3 | ROR2     | 0.329007549 | 1.53E-12    |
| PTCSC3 | GPR125   | 0.564679099 | 2.45E-38    |
| PTCSC3 | FLRT1    | 0.474327922 | 5.20E-26    |
| PTCSC3 | PGF      | 0.337930381 | 3.45E-13    |
| PTCSC3 | DUSP1    | 0.267373782 | 1.27E-08    |
| PTCSC3 | PLA2G7   | 0.371585781 | 8.04E-16    |
| PTCSC3 | PLSCR4   | 0.606742533 | 1.71E-45    |
| PTCSC3 | FAM46B   | 0.307737156 | 4.40E-11    |
| PTCSC3 | GLDC     | 0.206218856 | 1.33E-05    |
| PTCSC3 | ZBTB16   | 0.404823399 | 9.65E-19    |
| PTCSC3 | OMD      | 0.196034537 | 3.54E-05    |
| PTCSC3 | HSD11B2  | 0.511449466 | 1.24E-30    |
| PTCSC3 | FGL2     | 0.225953012 | 1.73E-06    |
| PTCSC3 | CLCNKA   | 0.498842219 | 5.34E-29    |
| PTCSC3 | GATM     | 0.574652378 | 6.10E-40    |
| PTCSC3 | TNS3     | 0.458328764 | 3.47E-24    |
| PTCSC3 | TOB1     | 0.318786623 | 7.95E-12    |
| PTCSC3 | MARC2    | 0.614039912 | 7.59E-47    |
| PTCSC3 | LRRC2    | 0.532124498 | 1.83E-33    |
| PTCSC3 | SORD     | 0.561276994 | 8.40E-38    |
| PTCSC3 | RIMS4    | 0.488303844 | 1.10E-27    |
| PTCSC3 | SLC29A4  | 0.399943705 | 2.72E-18    |
| PTCSC3 | SLC39A14 | 0.520345704 | 7.94E-32    |
| PTCSC3 | FAXDC2   | 0.5246828   | 2.02E-32    |
| PTCSC3 | HSPB8    | 0.230968798 | 9.99E-07    |



|        |          |              |             |
|--------|----------|--------------|-------------|
| PTCSC3 | CCL19    | -0.001197849 | 0.98003408  |
| PTCSC3 | KCNIP3   | 0.42097028   | 2.77E-20    |
| PTCSC3 | CGNL1    | 0.494875016  | 1.69E-28    |
| PTCSC3 | ATF3     | 0.152201743  | 0.001381241 |
| PTCSC3 | SGCD     | 0.29342359   | 3.64E-10    |
| PTCSC3 | STARD13  | 0.473746673  | 6.08E-26    |
| PTCSC3 | LDHD     | 0.541353699  | 8.61E-35    |
| PTCSC3 | RCAN1    | 0.329989416  | 1.30E-12    |
| PTCSC3 | ID3      | 0.221885264  | 2.67E-06    |
| PTCSC3 | SYTL3    | 0.520292231  | 8.07E-32    |
| PTCSC3 | MT1E     | 0.258226776  | 4.06E-08    |
| PTCSC3 | CAMK1D   | 0.474470822  | 5.00E-26    |
| PTCSC3 | PRKCQ    | 0.611927673  | 1.89E-46    |
| PTCSC3 | NUAK2    | 0.422190505  | 2.10E-20    |
| PTCSC3 | LIPG     | 0.545571864  | 2.06E-35    |
| PTCSC3 | SLC25A25 | 0.391957139  | 1.43E-17    |
| PTCSC3 | PRKX     | 0.4393784    | 3.80E-22    |
| PTCSC3 | SRPX     | 0.165189983  | 0.000510568 |
| PTCSC3 | FAM189A1 | 0.474069211  | 5.58E-26    |
| PTCSC3 | PLEKHH1  | 0.56473243   | 2.40E-38    |
| PTCSC3 | WNT11    | 0.347766007  | 6.33E-14    |
| PTCSC3 | SNAI1    | 0.296085802  | 2.48E-10    |
| PTCSC3 | FDCSP    | 0.02868815   | 0.548844085 |
| PTCSC3 | MT1X     | 0.289736675  | 6.15E-10    |
| PTCSC3 | ACACB    | 0.534300847  | 8.99E-34    |
| PTCSC3 | ARC      | 0.288785728  | 7.03E-10    |
| PTCSC3 | KLK4     | 0.247071439  | 1.58E-07    |
| PTCSC3 | ZFPM2    | 0.405997314  | 7.51E-19    |
| PTCSC3 | AKAP12   | 0.378504951  | 2.11E-16    |
| PTCSC3 | GJB6     | 0.421566552  | 2.42E-20    |
| PTCSC3 | ERO1LB   | 0.503355955  | 1.41E-29    |
| PTCSC3 | DNALI1   | 0.457214065  | 4.61E-24    |
| PTCSC3 | HKDC1    | 0.367878725  | 1.63E-15    |
| PTCSC3 | ZFP36L2  | 0.487919536  | 1.23E-27    |
| PTCSC3 | CAPSL    | 0.426765708  | 7.39E-21    |
| PTCSC3 | CYP7B1   | 0.48411128   | 3.57E-27    |
| PTCSC3 | CPQ      | 0.475225183  | 4.08E-26    |
| PTCSC3 | RPS6KA6  | 0.556932684  | 3.96E-37    |
| PTCSC3 | TLE1     | 0.363026973  | 4.03E-15    |
| PTCSC3 | TP53INP2 | 0.47013784   | 1.60E-25    |
| PTCSC3 | KATNAL2  | 0.524426784  | 2.19E-32    |
| PTCSC3 | SGPP2    | 0.365439765  | 2.57E-15    |
| PTCSC3 | CTH      | 0.5048178    | 9.16E-30    |
| PTCSC3 | KIF12    | 0.387276159  | 3.70E-17    |
| PTCSC3 | TMEM220  | 0.594247462  | 2.95E-43    |
| PTCSC3 | CENPJ    | 0.458371527  | 3.43E-24    |
| PTCSC3 | FAM155B  | 0.267209463  | 1.30E-08    |
| PTCSC3 | WFS1     | 0.413002579  | 1.64E-19    |
| PTCSC3 | SELENBP1 | 0.582808935  | 2.71E-41    |
| PTCSC3 | SNTA1    | 0.436522651  | 7.53E-22    |
| PTCSC3 | FRAS1    | 0.32497363   | 2.95E-12    |

|        |          |             |             |
|--------|----------|-------------|-------------|
| PTCSC3 | FBLN7    | 0.40563414  | 8.12E-19    |
| PTCSC3 | AGPAT9   | 0.574342676 | 6.86E-40    |
| PTCSC3 | GPR83    | 0.461812709 | 1.42E-24    |
| PTCSC3 | PRTG     | 0.562980671 | 4.54E-38    |
| PTCSC3 | EGR3     | 0.261005223 | 2.86E-08    |
| PTCSC3 | GRAMD2   | 0.386912347 | 3.98E-17    |
| PTCSC3 | HYOU1    | 0.40615681  | 7.25E-19    |
| PTCSC3 | FBLN5    | 0.300624023 | 1.27E-10    |
| PTCSC3 | ITM2A    | 0.413949129 | 1.33E-19    |
| PTCSC3 | SRF      | 0.374020699 | 5.04E-16    |
| PTCSC3 | FGFR2    | 0.498751142 | 5.49E-29    |
| PTCSC3 | MT1A     | 0.12883415  | 0.006872667 |
| PTCSC3 | MAMDC2   | 0.382999131 | 8.70E-17    |
| PTCSC3 | FHL2     | 0.205058487 | 1.49E-05    |
| PTCSC3 | FTCDNL1  | 0.543223112 | 4.58E-35    |
| PTCSC3 | PKIA     | 0.484585371 | 3.13E-27    |
| PTCSC3 | DNAJB4   | 0.540123332 | 1.30E-34    |
| PTCSC3 | SLC25A33 | 0.383911641 | 7.26E-17    |
| PTCSC3 | EYA2     | 0.430817323 | 2.89E-21    |
| PTCSC3 | LPAR1    | 0.297751821 | 1.94E-10    |
| PTCSC3 | STX11    | 0.279028894 | 2.71E-09    |
| PTCSC3 | ARHGEF28 | 0.412611321 | 1.78E-19    |
| PTCSC3 | OR2W3    | 0.438312849 | 4.91E-22    |
| PTCSC3 | ALDH1B1  | 0.326156457 | 2.44E-12    |
| PTCSC3 | CXCL12   | 0.202241459 | 1.96E-05    |
| PTCSC3 | OLFM2    | 0.393116516 | 1.13E-17    |
| PTCSC3 | TUB      | 0.537320631 | 3.32E-34    |
| PTCSC3 | HTRA3    | 0.255870861 | 5.43E-08    |
| PTCSC3 | CKB      | 0.248427106 | 1.34E-07    |
| PTCSC3 | RGS2     | 0.087391817 | 0.067348295 |
| PTCSC3 | SHANK2   | 0.551241165 | 2.93E-36    |
| PTCSC3 | CNTFR    | 0.33954489  | 2.63E-13    |
| PTCSC3 | CYTH3    | 0.569817291 | 3.71E-39    |
| PTCSC3 | PLAC9    | 0.233167912 | 7.82E-07    |
| PTCSC3 | WVOX     | 0.535934173 | 5.25E-34    |
| PTCSC3 | NPR3     | 0.351874036 | 3.06E-14    |
| PTCSC3 | SDC2     | 0.432567026 | 1.92E-21    |
| PTCSC3 | KLF15    | 0.464414428 | 7.21E-25    |
| PTCSC3 | TMEM164  | 0.442193371 | 1.93E-22    |
| PTCSC3 | LONRF3   | 0.468676705 | 2.35E-25    |
| PTCSC3 | GBP1     | 0.208245071 | 1.09E-05    |
| PTCSC3 | ARHGAP6  | 0.577680671 | 1.94E-40    |
| PTCSC3 | TMEM119  | 0.084063396 | 0.078506652 |
| PTCSC3 | SH3RF1   | 0.583353093 | 2.19E-41    |
| PTCSC3 | CRELD2   | 0.351571001 | 3.23E-14    |
| PTCSC3 | PCP4     | 0.196477198 | 3.39E-05    |
| PTCSC3 | GCSH     | 0.595576688 | 1.72E-43    |
| PTCSC3 | IMPA2    | 0.468202117 | 2.67E-25    |
| PTCSC3 | C1R      | 0.03875877  | 0.417896787 |
| PTCSC3 | SUCNR1   | 0.383584493 | 7.75E-17    |
| PTCSC3 | SFRP1    | 0.349762648 | 4.45E-14    |

|        |          |             |             |
|--------|----------|-------------|-------------|
| PTCSC3 | UGT8     | 0.348423564 | 5.64E-14    |
| PTCSC3 | TLE4     | 0.306681462 | 5.16E-11    |
| PTCSC3 | ANTXR1   | 0.383639101 | 7.66E-17    |
| PTCSC3 | GPX3     | 0.402919235 | 1.45E-18    |
| PTCSC3 | DPY19L2  | 0.540731885 | 1.06E-34    |
| PTCSC3 | FAM46C   | 0.433280254 | 1.62E-21    |
| PTCSC3 | IL33     | 0.242626827 | 2.66E-07    |
| PTCSC3 | PEG3     | 0.502178423 | 2.00E-29    |
| PTCSC3 | FAHD2A   | 0.483036013 | 4.81E-27    |
| PTCSC3 | PTGDS    | 0.050222473 | 0.293745614 |
| PTCSC3 | CHCHD10  | 0.298972046 | 1.63E-10    |
| PTCSC3 | CD36     | 0.381454383 | 1.18E-16    |
| PTCSC3 | ANKRD37  | 0.374719956 | 4.41E-16    |
| PTCSC3 | TSPAN33  | 0.277232597 | 3.46E-09    |
| PTCSC3 | PRDM16   | 0.57231171  | 1.47E-39    |
| PTCSC3 | UST      | 0.560879141 | 9.69E-38    |
| PTCSC3 | NEXN     | 0.420094436 | 3.38E-20    |
| PTCSC3 | NUPR1L   | 0.204073075 | 1.64E-05    |
| PTCSC3 | SLC24A3  | 0.335621769 | 5.10E-13    |
| PTCSC3 | MARC1    | 0.481302905 | 7.77E-27    |
| PTCSC3 | MYH11    | 0.275710756 | 4.24E-09    |
| PTCSC3 | APOA1    | 0.401596547 | 1.92E-18    |
| PTCSC3 | TMEM178B | 0.242908578 | 2.57E-07    |
| PTCSC3 | CAPN6    | 0.227711244 | 1.43E-06    |
| PTCSC3 | PPM1L    | 0.421114316 | 2.68E-20    |
| PTCSC3 | FZD8     | 0.458686619 | 3.17E-24    |
| PTCSC3 | RCAN2    | 0.417050682 | 6.68E-20    |
| PTCSC3 | COPZ2    | 0.371822861 | 7.69E-16    |
| PTCSC3 | GAS1     | 0.227394361 | 1.48E-06    |
| PTCSC3 | DACT1    | 0.318795913 | 7.93E-12    |
| PTCSC3 | WBSR17   | 0.44145135  | 2.31E-22    |
| PTCSC3 | NCS1     | 0.340272822 | 2.32E-13    |
| PTCSC3 | SPIRE2   | 0.399974838 | 2.70E-18    |
| PTCSC3 | C15orf52 | 0.314661999 | 1.52E-11    |
| PTCSC3 | SPAG5    | 0.346122682 | 8.44E-14    |
| PTCSC3 | ARL4D    | 0.291386312 | 4.87E-10    |
| PTCSC3 | FAM189A2 | 0.558228914 | 2.50E-37    |
| PTCSC3 | MAP1LC3A | 0.366844662 | 1.97E-15    |
| PTCSC3 | KLF6     | 0.148183994 | 0.00185101  |
| PTCSC3 | ADD3     | 0.549219632 | 5.89E-36    |
| PTCSC3 | TSPAN7   | 0.43534746  | 9.95E-22    |
| PTCSC3 | KLF9     | 0.386518962 | 4.31E-17    |
| PTCSC3 | KCNQ1    | 0.525929265 | 1.36E-32    |
| PTCSC3 | MAN1A1   | 0.157506594 | 0.000928262 |
| PTCSC3 | MLF1     | 0.441146897 | 2.48E-22    |
| PTCSC3 | RARB     | 0.481882167 | 6.62E-27    |
| PTCSC3 | CDC42EP2 | 0.3825505   | 9.51E-17    |
| PTCSC3 | FAM3B    | 0.302089484 | 1.03E-10    |
| PTCSC3 | GADD45B  | 0.092097689 | 0.053822918 |
| PTCSC3 | TMEM47   | 0.432664185 | 1.87E-21    |
| PTCSC3 | SDF2L1   | 0.258945322 | 3.71E-08    |

|        |          |              |             |
|--------|----------|--------------|-------------|
| PTCSC3 | CCDC85A  | 0.38763522   | 3.44E-17    |
| PTCSC3 | CRYBG3   | 0.31723996   | 1.01E-11    |
| PTCSC3 | FBLN2    | 0.098540003  | 0.039038492 |
| PTCSC3 | PEBP4    | 0.368373028  | 1.48E-15    |
| PTCSC3 | CDADC1   | 0.521109071  | 6.25E-32    |
| PTCSC3 | FAM63A   | 0.564311245  | 2.80E-38    |
| PTCSC3 | GLUL     | 0.378514099  | 2.11E-16    |
| PTCSC3 | FREM2    | 0.424887042  | 1.14E-20    |
| PTCSC3 | ACKR3    | 0.433301955  | 1.61E-21    |
| PTCSC3 | DENND6A  | 0.496736203  | 9.86E-29    |
| PTCSC3 | CLDN8    | 0.301032798  | 1.20E-10    |
| PTCSC3 | UTS2R    | 0.245541058  | 1.89E-07    |
| PTCSC3 | SCNN1B   | 0.432636739  | 1.89E-21    |
| PTCSC3 | TTC30A   | 0.515936342  | 3.13E-31    |
| PTCSC3 | CORO2B   | 0.482538944  | 5.52E-27    |
| PTCSC3 | TC2N     | 0.321408979  | 5.24E-12    |
| PTCSC3 | ALDH2    | 0.405945614  | 7.59E-19    |
| PTCSC3 | GPR183   | 0.060012285  | 0.209499328 |
| PTCSC3 | C4orf47  | 0.525271353  | 1.67E-32    |
| PTCSC3 | SLC25A42 | 0.447594104  | 5.15E-23    |
| PTCSC3 | LGMN     | 0.390873787  | 1.78E-17    |
| PTCSC3 | ACSF2    | 0.395386974  | 7.04E-18    |
| PTCSC3 | KIAA1467 | 0.491305189  | 4.70E-28    |
| PTCSC3 | PRKG1    | 0.454871483  | 8.36E-24    |
| PTCSC3 | GNAI1    | 0.514337341  | 5.13E-31    |
| PTCSC3 | ABCC4    | 0.303618276  | 8.17E-11    |
| PTCSC3 | PRPS1    | 0.540779116  | 1.04E-34    |
| PTCSC3 | TSPAN5   | 0.399327493  | 3.10E-18    |
| PTCSC3 | CR2      | 0.071797969  | 0.133101133 |
| PTCSC3 | CCDC170  | 0.528381203  | 6.17E-33    |
| PTCSC3 | RRAD     | -0.031552167 | 0.509657778 |
| PTCSC3 | SCGB2A1  | 0.367113017  | 1.88E-15    |
| PTCSC3 | SESN3    | 0.344959759  | 1.03E-13    |
| PTCSC3 | SGK223   | 0.300988119  | 1.21E-10    |
| PTCSC3 | NDRG2    | 0.487299921  | 1.46E-27    |
| PTCSC3 | C3orf52  | 0.184050563  | 0.000105113 |
| PTCSC3 | FLRT3    | -0.180239257 | 0.000146574 |
| PTCSC3 | MST1R    | -0.273758864 | 5.50E-09    |
| PTCSC3 | SDC1     | -0.424821797 | 1.15E-20    |
| PTCSC3 | ST8SIA4  | -0.42284792  | 1.81E-20    |
| PTCSC3 | UBTD1    | -0.305668674 | 6.01E-11    |
| PTCSC3 | EPHA2    | -0.319741825 | 6.83E-12    |
| PTCSC3 | TMEM130  | -0.20327219  | 1.77E-05    |
| PTCSC3 | SPINK2   | -0.383353795 | 8.11E-17    |
| PTCSC3 | MMP16    | -0.318595568 | 8.19E-12    |
| PTCSC3 | SIGLEC15 | -0.364823341 | 2.88E-15    |
| PTCSC3 | RIN1     | -0.418415722 | 4.92E-20    |
| PTCSC3 | IL1RN    | -0.364031464 | 3.34E-15    |
| PTCSC3 | FCER1G   | -0.337223039 | 3.89E-13    |
| PTCSC3 | CD276    | -0.440916198 | 2.63E-22    |
| PTCSC3 | CTSB     | -0.201261932 | 2.15E-05    |

|        |          |              |             |
|--------|----------|--------------|-------------|
| PTCSC3 | FAM171A2 | -0.148814247 | 0.001768757 |
| PTCSC3 | ASPHD1   | -0.418563517 | 4.76E-20    |
| PTCSC3 | C15orf48 | -0.266552119 | 1.41E-08    |
| PTCSC3 | DYSF     | -0.174208626 | 0.000244692 |
| PTCSC3 | PDZRN4   | -0.066784228 | 0.162457082 |
| PTCSC3 | EFHD2    | -0.248505116 | 1.33E-07    |
| PTCSC3 | ASF1B    | -0.389923833 | 2.16E-17    |
| PTCSC3 | AQP1     | -0.171914056 | 0.000296079 |
| PTCSC3 | ARRDC2   | -0.367378678 | 1.79E-15    |
| PTCSC3 | PRSS1    | -0.121897158 | 0.010579598 |
| PTCSC3 | MAPK13   | -0.345708517 | 9.07E-14    |
| PTCSC3 | CST5     | -0.360077629 | 6.94E-15    |
| PTCSC3 | AHR      | -0.357218813 | 1.17E-14    |
| PTCSC3 | BAX      | -0.54221309  | 6.45E-35    |
| PTCSC3 | C1orf115 | -0.025663941 | 0.591768848 |
| PTCSC3 | PLK3     | -0.382855734 | 8.96E-17    |
| PTCSC3 | JAG2     | -0.317022524 | 1.05E-11    |
| PTCSC3 | RAD23B   | -0.164512001 | 0.000538795 |
| PTCSC3 | CA12     | 0.029802677  | 0.533420264 |
| PTCSC3 | ADTRP    | -0.110591621 | 0.02046788  |
| PTCSC3 | UCP2     | -0.296689461 | 2.27E-10    |
| PTCSC3 | IGFBP2   | -0.327365146 | 2.00E-12    |
| PTCSC3 | LOXL2    | -0.318131265 | 8.81E-12    |
| PTCSC3 | GPX1     | -0.520988439 | 6.49E-32    |
| PTCSC3 | P3H3     | -0.4261762   | 8.46E-21    |
| PTCSC3 | C2orf81  | -0.202658673 | 1.88E-05    |
| PTCSC3 | CDT1     | -0.456332831 | 5.77E-24    |
| PTCSC3 | SNX25    | -0.174779166 | 0.000233277 |
| PTCSC3 | MTHFD1L  | -0.440620752 | 2.82E-22    |
| PTCSC3 | CDC42BPG | -0.302218567 | 1.01E-10    |
| PTCSC3 | MSN      | -0.291432126 | 4.83E-10    |
| PTCSC3 | SIGLEC6  | -0.286126917 | 1.02E-09    |
| PTCSC3 | F2R      | -0.270226977 | 8.76E-09    |
| PTCSC3 | TMEM184A | -0.457893324 | 3.88E-24    |
| PTCSC3 | CKS2     | -0.323808296 | 3.57E-12    |
| PTCSC3 | TAX1BP3  | -0.501950278 | 2.14E-29    |
| PTCSC3 | PMEP1    | -0.362413599 | 4.51E-15    |
| PTCSC3 | CXCL16   | -0.436884194 | 6.91E-22    |
| PTCSC3 | FAXC     | -0.458243307 | 3.55E-24    |
| PTCSC3 | VTCN1    | -0.435597845 | 9.38E-22    |
| PTCSC3 | SH2D4A   | -0.316097178 | 1.21E-11    |
| PTCSC3 | RNF24    | -0.254170943 | 6.69E-08    |
| PTCSC3 | LY6G6C   | -0.250820448 | 1.01E-07    |
| PTCSC3 | NID1     | -0.304271223 | 7.41E-11    |
| PTCSC3 | STAC     | -0.377734491 | 2.45E-16    |
| PTCSC3 | RAB34    | -0.365286084 | 2.64E-15    |
| PTCSC3 | HES4     | -0.363332207 | 3.80E-15    |
| PTCSC3 | EPHA10   | -0.305942419 | 5.77E-11    |
| PTCSC3 | ENTPD2   | -0.257672121 | 4.35E-08    |
| PTCSC3 | DDB2     | -0.419525953 | 3.84E-20    |
| PTCSC3 | NKAIN4   | -0.421218566 | 2.62E-20    |

|        |          |              |             |
|--------|----------|--------------|-------------|
| PTCSC3 | TRIM29   | -0.445678806 | 8.24E-23    |
| PTCSC3 | ADCY8    | -0.265260105 | 1.67E-08    |
| PTCSC3 | SFTA2    | -0.258367833 | 3.99E-08    |
| PTCSC3 | NRIP1    | -0.265876194 | 1.54E-08    |
| PTCSC3 | VWA1     | -0.237333953 | 4.89E-07    |
| PTCSC3 | APLNR    | -0.175251483 | 0.000224206 |
| PTCSC3 | REN      | -0.298052585 | 1.86E-10    |
| PTCSC3 | EDIL3    | -0.22839949  | 1.33E-06    |
| PTCSC3 | AGRN     | -0.277320678 | 3.42E-09    |
| PTCSC3 | TREM1    | -0.336619806 | 4.31E-13    |
| PTCSC3 | SRL      | -0.303301554 | 8.57E-11    |
| PTCSC3 | RASGRF1  | -0.354025279 | 2.08E-14    |
| PTCSC3 | RMI2     | -0.387850883 | 3.29E-17    |
| PTCSC3 | SAMD1    | -0.457557169 | 4.23E-24    |
| PTCSC3 | MGAT4B   | -0.419398867 | 3.95E-20    |
| PTCSC3 | NXN      | -0.434553384 | 1.20E-21    |
| PTCSC3 | SH3BGRL3 | -0.460093643 | 2.21E-24    |
| PTCSC3 | CA11     | -0.179459933 | 0.000156756 |
| PTCSC3 | PLD3     | -0.294351772 | 3.18E-10    |
| PTCSC3 | LURAP1L  | -0.302224868 | 1.01E-10    |
| PTCSC3 | CARNS1   | -0.175375946 | 0.000221872 |
| PTCSC3 | PDLIM7   | -0.390162545 | 2.06E-17    |
| PTCSC3 | BCL2L1   | -0.481127097 | 8.15E-27    |
| PTCSC3 | GGT6     | -0.223452068 | 2.26E-06    |
| PTCSC3 | DPYSL3   | -0.278588418 | 2.88E-09    |
| PTCSC3 | FYN      | -0.460096551 | 2.21E-24    |
| PTCSC3 | TK1      | -0.421800027 | 2.30E-20    |
| PTCSC3 | AK1      | -0.305749237 | 5.94E-11    |
| PTCSC3 | HIGD1B   | -0.131574368 | 0.005763497 |
| PTCSC3 | TMEM59L  | -0.35979798  | 7.30E-15    |
| PTCSC3 | MEGF9    | -0.090686835 | 0.057617547 |
| PTCSC3 | ZFP36L1  | -0.293046374 | 3.84E-10    |
| PTCSC3 | ADRA1B   | -0.166153057 | 0.000472828 |
| PTCSC3 | EPHA4    | -0.254226259 | 6.65E-08    |
| PTCSC3 | TCERG1L  | -0.050626    | 0.289879034 |
| PTCSC3 | NGFR     | -0.084644857 | 0.07645586  |
| PTCSC3 | EBI3     | -0.42023911  | 3.27E-20    |
| PTCSC3 | S100A10  | -0.439002745 | 4.16E-22    |
| PTCSC3 | S100B    | -0.262027585 | 2.52E-08    |
| PTCSC3 | CD44     | -0.167034362 | 0.00044058  |
| PTCSC3 | BHLHE41  | -0.101159593 | 0.034096889 |
| PTCSC3 | FBXO2    | -0.311851993 | 2.34E-11    |
| PTCSC3 | SLC30A2  | -0.353103976 | 2.46E-14    |
| PTCSC3 | FRMD5    | -0.33482507  | 5.83E-13    |
| PTCSC3 | SAMD11   | -0.281845566 | 1.85E-09    |
| PTCSC3 | SIP1L2   | -0.29366755  | 3.51E-10    |
| PTCSC3 | S100A16  | -0.421442598 | 2.49E-20    |
| PTCSC3 | PPL      | -0.307139667 | 4.81E-11    |
| PTCSC3 | ARHGD1B  | -0.346942713 | 7.31E-14    |
| PTCSC3 | CDC42EP3 | -0.440346722 | 3.01E-22    |
| PTCSC3 | RUNX2    | -0.253569979 | 7.20E-08    |

|        |          |              |             |
|--------|----------|--------------|-------------|
| PTCSC3 | LAMC2    | -0.409957619 | 3.19E-19    |
| PTCSC3 | BRINP1   | -0.316127673 | 1.21E-11    |
| PTCSC3 | GPRC5B   | -0.183147982 | 0.000113793 |
| PTCSC3 | AQP5     | -0.088230429 | 0.064752145 |
| PTCSC3 | PLAG1    | -0.210379861 | 8.78E-06    |
| PTCSC3 | PTPRU    | -0.415211409 | 1.01E-19    |
| PTCSC3 | ANGPTL4  | -0.291853949 | 4.55E-10    |
| PTCSC3 | PALM3    | -0.139120175 | 0.003491377 |
| PTCSC3 | ACP5     | -0.355360321 | 1.64E-14    |
| PTCSC3 | DLG4     | -0.204778784 | 1.53E-05    |
| PTCSC3 | ETNK2    | -0.204417099 | 1.59E-05    |
| PTCSC3 | CD109    | -0.330816185 | 1.14E-12    |
| PTCSC3 | SNX22    | -0.088838485 | 0.062921674 |
| PTCSC3 | TMEM98   | -0.186139611 | 8.74E-05    |
| PTCSC3 | CTHRC1   | -0.309047376 | 3.60E-11    |
| PTCSC3 | S100A2   | -0.345619443 | 9.21E-14    |
| PTCSC3 | C11orf80 | -0.396947608 | 5.09E-18    |
| PTCSC3 | SREBF1   | -0.366013638 | 2.31E-15    |
| PTCSC3 | PRSS22   | -0.395064578 | 7.53E-18    |
| PTCSC3 | CMTM3    | -0.480362453 | 1.01E-26    |
| PTCSC3 | RDH5     | -0.083760786 | 0.079591465 |
| PTCSC3 | MYH10    | -0.258774267 | 3.79E-08    |
| PTCSC3 | EVPL     | -0.370255419 | 1.04E-15    |
| PTCSC3 | SCD      | -0.438204982 | 5.04E-22    |
| PTCSC3 | CD151    | -0.353387367 | 2.33E-14    |
| PTCSC3 | S100A4   | -0.477274092 | 2.34E-26    |
| PTCSC3 | BNIP1    | -0.137106868 | 0.004000518 |
| PTCSC3 | MAP3K6   | -0.373252934 | 5.84E-16    |
| PTCSC3 | MANEAL   | -0.315526496 | 1.33E-11    |
| PTCSC3 | CD207    | -0.231407381 | 9.52E-07    |
| PTCSC3 | CD1A     | -0.267854331 | 1.19E-08    |
| PTCSC3 | C3       | -0.383497405 | 7.88E-17    |
| PTCSC3 | NT5E     | -0.30140739  | 1.14E-10    |
| PTCSC3 | CACNG4   | -0.392084858 | 1.39E-17    |
| PTCSC3 | FHOD1    | -0.259144249 | 3.62E-08    |
| PTCSC3 | LEMD1    | -0.395489877 | 6.90E-18    |
| PTCSC3 | ATP11A   | -0.186357189 | 8.57E-05    |
| PTCSC3 | PPAP2C   | -0.332150944 | 9.11E-13    |
| PTCSC3 | DRAM1    | -0.411617539 | 2.22E-19    |
| PTCSC3 | CDA      | -0.294700479 | 3.03E-10    |
| PTCSC3 | CCND2    | -0.192832196 | 4.76E-05    |
| PTCSC3 | LCN6     | -0.043841789 | 0.359452317 |
| PTCSC3 | CDH4     | -0.267195776 | 1.30E-08    |
| PTCSC3 | MMP11    | -0.422872316 | 1.80E-20    |
| PTCSC3 | B3GAT1   | -0.267068264 | 1.32E-08    |
| PTCSC3 | SPP1     | -0.232587302 | 8.35E-07    |
| PTCSC3 | HLA-DQB1 | -0.290625143 | 5.42E-10    |
| PTCSC3 | SDC3     | -0.436072247 | 8.38E-22    |
| PTCSC3 | CX3CL1   | -0.324422522 | 3.23E-12    |
| PTCSC3 | SDK1     | -0.333189333 | 7.67E-13    |
| PTCSC3 | DOCK9    | -0.220424413 | 3.12E-06    |

|        |          |              |             |
|--------|----------|--------------|-------------|
| PTCSC3 | CSF2     | -0.430263159 | 3.29E-21    |
| PTCSC3 | GRHL3    | -0.44223961  | 1.91E-22    |
| PTCSC3 | TMEM92   | -0.410379261 | 2.91E-19    |
| PTCSC3 | BASP1    | -0.459647494 | 2.47E-24    |
| PTCSC3 | HRH1     | -0.413167181 | 1.58E-19    |
| PTCSC3 | ESM1     | -0.14874347  | 0.001777824 |
| PTCSC3 | B4GALNT3 | -0.275604236 | 4.30E-09    |
| PTCSC3 | LMO3     | -0.067413063 | 0.158528503 |
| PTCSC3 | C9orf16  | -0.448743126 | 3.87E-23    |
| PTCSC3 | SEMA3F   | -0.348420798 | 5.64E-14    |
| PTCSC3 | PLA2G12B | -0.165521824 | 0.000497259 |
| PTCSC3 | KLK6     | -0.260103712 | 3.21E-08    |
| PTCSC3 | ST3GAL5  | -0.335191648 | 5.48E-13    |
| PTCSC3 | FAM132B  | -0.087785982 | 0.066117609 |
| PTCSC3 | CDKN1A   | -0.358196426 | 9.78E-15    |
| PTCSC3 | E2F1     | -0.447669845 | 5.05E-23    |
| PTCSC3 | B3GNT8   | -0.44498196  | 9.78E-23    |
| PTCSC3 | MTMR11   | -0.34003411  | 2.42E-13    |
| PTCSC3 | MYO1G    | -0.429401434 | 4.02E-21    |
| PTCSC3 | TMSB10   | -0.474108074 | 5.52E-26    |
| PTCSC3 | UNC5CL   | -0.325702602 | 2.63E-12    |
| PTCSC3 | ABR      | -0.44239868  | 1.83E-22    |
| PTCSC3 | PLP2     | -0.490186094 | 6.46E-28    |
| PTCSC3 | SRCIN1   | -0.238668427 | 4.20E-07    |
| PTCSC3 | PDE9A    | -0.375295247 | 3.94E-16    |
| PTCSC3 | TREM2    | -0.333763419 | 6.97E-13    |
| PTCSC3 | KDEL3    | -0.315686843 | 1.29E-11    |
| PTCSC3 | PC       | -0.170816804 | 0.000324064 |
| PTCSC3 | C2CD4A   | -0.29562008  | 2.65E-10    |
| PTCSC3 | PELI1    | -0.396177432 | 5.98E-18    |
| PTCSC3 | SSX1     | -0.295220666 | 2.81E-10    |
| PTCSC3 | MROH6    | -0.425243833 | 1.05E-20    |
| PTCSC3 | ESPN     | -0.337493026 | 3.72E-13    |
| PTCSC3 | BMP1     | -0.287736914 | 8.15E-10    |
| PTCSC3 | TM4SF4   | -0.333560758 | 7.21E-13    |
| PTCSC3 | CORO2A   | -0.382234913 | 1.01E-16    |
| PTCSC3 | CD164L2  | -0.261059343 | 2.84E-08    |
| PTCSC3 | CTSS     | -0.314647815 | 1.52E-11    |
| PTCSC3 | CLU      | -0.289145924 | 6.69E-10    |
| PTCSC3 | TMSB4X   | -0.522174339 | 4.47E-32    |
| PTCSC3 | WNT10A   | -0.35748236  | 1.11E-14    |
| PTCSC3 | NAPSA    | -0.35018277  | 4.13E-14    |
| PTCSC3 | PLEKHA4  | -0.162974203 | 0.000608274 |
| PTCSC3 | SFTPA1   | -0.174905485 | 0.000230818 |
| PTCSC3 | C1orf116 | -0.309746562 | 3.24E-11    |
| PTCSC3 | TM4SF1   | -0.358596761 | 9.10E-15    |
| PTCSC3 | SEL1L3   | -0.306578984 | 5.24E-11    |
| PTCSC3 | VASN     | -0.309858614 | 3.18E-11    |
| PTCSC3 | NPTXR    | -0.268842647 | 1.05E-08    |
| PTCSC3 | PDE4C    | -0.436624632 | 7.35E-22    |
| PTCSC3 | CDC42EP1 | -0.385194699 | 5.62E-17    |



|        |          |              |             |
|--------|----------|--------------|-------------|
| PTCSC3 | ENDOD1   | -0.339083375 | 2.84E-13    |
| PTCSC3 | RYR1     | -0.424456282 | 1.26E-20    |
| PTCSC3 | IL1RAP   | -0.300209079 | 1.36E-10    |
| PTCSC3 | SLC35F2  | -0.290130709 | 5.82E-10    |
| PTCSC3 | ISYNA1   | -0.314103374 | 1.66E-11    |
| PTCSC3 | HLA-G    | -0.372978054 | 6.16E-16    |
| PTCSC3 | CDKN2B   | -0.423578098 | 1.53E-20    |
| PTCSC3 | ALDH1A3  | -0.442496051 | 1.79E-22    |
| PTCSC3 | CLIP3    | -0.388272069 | 3.02E-17    |
| PTCSC3 | ULBP2    | -0.343354659 | 1.36E-13    |
| PTCSC3 | ETHE1    | -0.402650525 | 1.53E-18    |
| PTCSC3 | XPR1     | -0.38759352  | 3.47E-17    |
| PTCSC3 | SPTBN2   | -0.397190717 | 4.84E-18    |
| PTCSC3 | IVL      | -0.454200616 | 9.90E-24    |
| PTCSC3 | MARCO    | -0.38372704  | 7.53E-17    |
| PTCSC3 | PLXND1   | -0.309544161 | 3.34E-11    |
| PTCSC3 | EMILIN2  | -0.403226525 | 1.36E-18    |
| PTCSC3 | PLAUR    | -0.442037988 | 2.00E-22    |
| PTCSC3 | CDC42EP5 | -0.434593737 | 1.19E-21    |
| PTCSC3 | TRPC5    | -0.132521004 | 0.005419471 |
| PTCSC3 | TMEM100  | -0.281974354 | 1.81E-09    |
| PTCSC3 | QSOX1    | -0.411560875 | 2.25E-19    |
| PTCSC3 | ARHGAP23 | -0.37079667  | 9.35E-16    |
| PTCSC3 | MDF1     | -0.430767539 | 2.92E-21    |
| PTCSC3 | FSTL3    | -0.368885273 | 1.34E-15    |
| PTCSC3 | INF2     | -0.295791348 | 2.58E-10    |
| PTCSC3 | TGFBR1   | -0.241687431 | 2.96E-07    |
| PTCSC3 | TGFBI    | -0.269015405 | 1.03E-08    |
| PTCSC3 | ERBB3    | -0.296778606 | 2.24E-10    |
| PTCSC3 | CCL18    | -0.35021369  | 4.11E-14    |
| PTCSC3 | CCL17    | -0.306538004 | 5.27E-11    |
| PTCSC3 | C16orf45 | -0.246795624 | 1.63E-07    |
| PTCSC3 | PRDM1    | -0.262000707 | 2.53E-08    |
| PTCSC3 | TRIM47   | -0.485507241 | 2.42E-27    |
| PTCSC3 | CNFN     | -0.320051456 | 6.50E-12    |
| PTCSC3 | ARMCX3   | -0.045607022 | 0.340415342 |
| PTCSC3 | RAMP1    | -0.180154226 | 0.000147654 |
| PTCSC3 | GABRD    | -0.155118553 | 0.001111825 |
| PTCSC3 | COL13A1  | -0.091629414 | 0.05505865  |
| PTCSC3 | S100A5   | -0.273145064 | 5.97E-09    |
| PTCSC3 | MISP     | -0.400256101 | 2.55E-18    |
| PTCSC3 | HES6     | -0.274970224 | 4.68E-09    |
| PTCSC3 | PSD3     | -0.271002968 | 7.91E-09    |
| PTCSC3 | DOK7     | -0.364305351 | 3.17E-15    |
| PTCSC3 | ZMAT3    | -0.468098364 | 2.74E-25    |
| PTCSC3 | MFAP2    | -0.279822331 | 2.43E-09    |
| PTCSC3 | TMEM79   | -0.375889899 | 3.51E-16    |
| PTCSC3 | SLC1A5   | -0.326582985 | 2.28E-12    |
| PTCSC3 | BBC3     | -0.458988661 | 2.93E-24    |
| PTCSC3 | HLA-DQB2 | -0.305421381 | 6.24E-11    |
| PTCSC3 | C1QL1    | -0.212817616 | 6.86E-06    |

|        |           |              |             |
|--------|-----------|--------------|-------------|
| PTCSC3 | TMEM215   | -0.038055679 | 0.426398417 |
| PTCSC3 | PNP       | -0.315948604 | 1.24E-11    |
| PTCSC3 | ARNTL     | -0.171103456 | 0.000316524 |
| PTCSC3 | CLDN2     | -0.031995587 | 0.503723961 |
| PTCSC3 | MVP       | -0.505561452 | 7.34E-30    |
| PTCSC3 | LGALS1    | -0.44310971  | 1.54E-22    |
| PTCSC3 | BIRC7     | -0.451086737 | 2.16E-23    |
| PTCSC3 | COL8A1    | -0.210265966 | 8.88E-06    |
| PTCSC3 | PERP      | -0.452212746 | 1.63E-23    |
| PTCSC3 | GJA4      | -0.288371564 | 7.46E-10    |
| PTCSC3 | IGFL2     | -0.401857014 | 1.82E-18    |
| PTCSC3 | DAPK2     | -0.189454842 | 6.48E-05    |
| PTCSC3 | MAMLD1    | -0.289628666 | 6.24E-10    |
| PTCSC3 | ETV5      | -0.267894749 | 1.19E-08    |
| PTCSC3 | RUNX1     | -0.504487532 | 1.01E-29    |
| PTCSC3 | LONRF2    | -0.013928194 | 0.771043554 |
| PTCSC3 | SPOCK1    | -0.186408322 | 8.53E-05    |
| PTCSC3 | XKRX      | -0.300181846 | 1.36E-10    |
| PTCSC3 | TGFB1     | -0.37334988  | 5.74E-16    |
| PTCSC3 | ERP27     | -0.074877952 | 0.117209581 |
| PTCSC3 | TNFRSF10C | -0.367220814 | 1.84E-15    |
| PTCSC3 | PALM      | -0.372472972 | 6.79E-16    |
| PTCSC3 | TSC22D1   | -0.166467155 | 0.000461091 |
| PTCSC3 | TGM2      | -0.485053433 | 2.74E-27    |
| PTCSC3 | UBE2QL1   | -0.106612522 | 0.025497458 |
| PTCSC3 | ECE1      | -0.366200437 | 2.23E-15    |
| PTCSC3 | COL8A2    | -0.354522915 | 1.90E-14    |
| PTCSC3 | HIST3H2A  | -0.348046348 | 6.02E-14    |
| PTCSC3 | TNFRSF21  | -0.373072801 | 6.05E-16    |
| PTCSC3 | SOX4      | -0.425338864 | 1.03E-20    |
| PTCSC3 | ELF3      | -0.422228376 | 2.08E-20    |
| PTCSC3 | TPD52L1   | -0.191359572 | 5.45E-05    |
| PTCSC3 | INHBB     | -0.164134289 | 0.000555142 |
| PTCSC3 | HPN       | -0.327896184 | 1.84E-12    |
| PTCSC3 | MMP7      | -0.379653167 | 1.69E-16    |
| PTCSC3 | RAB27A    | -0.276197966 | 3.97E-09    |
| PTCSC3 | IGF2BP2   | -0.307197749 | 4.77E-11    |
| PTCSC3 | ITGB4     | -0.463563547 | 8.99E-25    |
| PTCSC3 | PPP1R1B   | -0.366510919 | 2.10E-15    |
| PTCSC3 | NPDC1     | -0.386141179 | 4.65E-17    |
| PTCSC3 | CCL13     | -0.384246122 | 6.79E-17    |
| PTCSC3 | SPINT1    | -0.422108878 | 2.14E-20    |
| PTCSC3 | HEY2      | -0.190035381 | 6.15E-05    |
| PTCSC3 | CST2      | -0.368120413 | 1.55E-15    |
| PTCSC3 | ADM       | -0.259600681 | 3.42E-08    |
| PTCSC3 | VSTM2L    | -0.476713268 | 2.73E-26    |
| PTCSC3 | FAM84A    | -0.451105849 | 2.15E-23    |
| PTCSC3 | P4HA2     | -0.305168201 | 6.48E-11    |
| PTCSC3 | LPL       | -0.367860641 | 1.63E-15    |
| PTCSC3 | TMEM173   | -0.47427842  | 5.27E-26    |
| PTCSC3 | DHRS3     | -0.321577411 | 5.10E-12    |

|        |            |              |             |
|--------|------------|--------------|-------------|
| PTCSC3 | SCN1B      | -0.444090443 | 1.22E-22    |
| PTCSC3 | GLT1D1     | -0.245889356 | 1.81E-07    |
| PTCSC3 | PHYHIP     | -0.376407889 | 3.18E-16    |
| PTCSC3 | BHLHE40    | -0.359195243 | 8.15E-15    |
| PTCSC3 | BID        | -0.355660307 | 1.55E-14    |
| PTCSC3 | POSTN      | -0.28737842  | 8.57E-10    |
| PTCSC3 | ITGA3      | -0.378051852 | 2.31E-16    |
| PTCSC3 | RSP04      | -0.244803025 | 2.06E-07    |
| PTCSC3 | ADAMTS9    | -0.114070035 | 0.01680129  |
| PTCSC3 | ABTB2      | -0.30807487  | 4.18E-11    |
| PTCSC3 | KCNQ3      | -0.379085774 | 1.88E-16    |
| PTCSC3 | ANXA1      | -0.214895672 | 5.55E-06    |
| PTCSC3 | S100A11    | -0.513765808 | 6.12E-31    |
| PTCSC3 | CEACAM6    | -0.421415456 | 2.51E-20    |
| PTCSC3 | IER5L      | -0.400910821 | 2.22E-18    |
| PTCSC3 | KRT80      | -0.371255726 | 8.57E-16    |
| PTCSC3 | CDH6       | -0.420275987 | 3.24E-20    |
| PTCSC3 | UNC5B      | -0.353569415 | 2.26E-14    |
| PTCSC3 | PLEKHN1    | -0.450586725 | 2.45E-23    |
| PTCSC3 | SYTL1      | -0.47212051  | 9.41E-26    |
| PTCSC3 | TMEM163    | -0.315994275 | 1.23E-11    |
| PTCSC3 | C4orf48    | -0.355902707 | 1.48E-14    |
| PTCSC3 | B3GNT7     | -0.232501845 | 8.43E-07    |
| PTCSC3 | BAIAP3     | -0.355484713 | 1.60E-14    |
| PTCSC3 | PHLDA2     | -0.368527701 | 1.44E-15    |
| PTCSC3 | GAP43      | -0.25783988  | 4.26E-08    |
| PTCSC3 | S100A1     | -0.341485955 | 1.88E-13    |
| PTCSC3 | PTPRE      | -0.347024482 | 7.21E-14    |
| PTCSC3 | CCND1      | -0.470742917 | 1.36E-25    |
| PTCSC3 | ST6GALNAC5 | -0.422318458 | 2.04E-20    |
| PTCSC3 | KRT17      | -0.334513312 | 6.14E-13    |
| PTCSC3 | HPCAL4     | -0.167452852 | 0.000425994 |
| PTCSC3 | GABBR2     | -0.08193598  | 0.086393095 |
| PTCSC3 | DIRAS3     | -0.131981016 | 0.005613379 |
| PTCSC3 | SERINC2    | -0.467123801 | 3.54E-25    |
| PTCSC3 | PTCHD4     | -0.400595446 | 2.37E-18    |
| PTCSC3 | EPS8       | -0.172447576 | 0.000283303 |
| PTCSC3 | LY6E       | -0.379554404 | 1.72E-16    |
| PTCSC3 | UPP1       | -0.479519374 | 1.27E-26    |
| PTCSC3 | AHNAK2     | -0.441738499 | 2.15E-22    |
| PTCSC3 | PLXNC1     | -0.18274403  | 0.000117892 |
| PTCSC3 | TNC        | -0.360724531 | 6.16E-15    |
| PTCSC3 | DUSP4      | -0.404101731 | 1.13E-18    |
| PTCSC3 | NRCAM      | -0.276212434 | 3.96E-09    |
| PTCSC3 | NRP2       | -0.251315974 | 9.47E-08    |
| PTCSC3 | CTSC       | -0.360844242 | 6.03E-15    |
| PTCSC3 | AMIGO2     | -0.31681069  | 1.08E-11    |
| PTCSC3 | NAB2       | -0.191123414 | 5.57E-05    |
| PTCSC3 | TBC1D2     | -0.400468715 | 2.43E-18    |
| PTCSC3 | PHLDA3     | -0.494007044 | 2.17E-28    |
| PTCSC3 | PTP4A3     | -0.373741138 | 5.32E-16    |

|        |         |              |             |
|--------|---------|--------------|-------------|
| PTCSC3 | CRABP2  | -0.282775663 | 1.62E-09    |
| PTCSC3 | GOS2    | -0.275934646 | 4.11E-09    |
| PTCSC3 | S100A6  | -0.433345925 | 1.60E-21    |
| PTCSC3 | FOXQ1   | -0.295063369 | 2.87E-10    |
| PTCSC3 | LRG1    | -0.33160253  | 9.98E-13    |
| PTCSC3 | LAMP5   | -0.295965595 | 2.52E-10    |
| PTCSC3 | ALDH3B1 | -0.466756159 | 3.90E-25    |
| PTCSC3 | CDH2    | -0.132406669 | 0.005460018 |
| PTCSC3 | SCG5    | -0.141398647 | 0.002986588 |
| PTCSC3 | ZCCHC16 | -0.105388739 | 0.027244571 |
| PTCSC3 | GRB7    | -0.441788851 | 2.13E-22    |
| PTCSC3 | TIAM1   | -0.272552681 | 6.45E-09    |
| PTCSC3 | FXYD5   | -0.458507975 | 3.31E-24    |
| PTCSC3 | CLDN9   | -0.327422519 | 1.98E-12    |
| PTCSC3 | FAM43A  | -0.281449699 | 1.95E-09    |
| PTCSC3 | CHST2   | -0.430242457 | 3.30E-21    |
| PTCSC3 | HMGA2   | -0.383642079 | 7.66E-17    |
| PTCSC3 | GALNT7  | -0.236498532 | 5.38E-07    |
| PTCSC3 | CBLN1   | -0.279667161 | 2.49E-09    |
| PTCSC3 | STRA6   | -0.447727856 | 4.98E-23    |
| PTCSC3 | MUC21   | -0.405883084 | 7.69E-19    |
| PTCSC3 | PRR36   | -0.395833619 | 6.42E-18    |
| PTCSC3 | NFE2L3  | -0.435939275 | 8.65E-22    |
| PTCSC3 | NR1D1   | -0.28815661  | 7.69E-10    |
| PTCSC3 | MUC1    | -0.435203779 | 1.03E-21    |
| PTCSC3 | NAT8L   | -0.196376777 | 3.42E-05    |
| PTCSC3 | APOC1   | -0.317115569 | 1.03E-11    |
| PTCSC3 | EVA1A   | -0.410197182 | 3.03E-19    |
| PTCSC3 | ENTPD1  | -0.258600304 | 3.87E-08    |
| PTCSC3 | COL1A1  | -0.330664561 | 1.17E-12    |
| PTCSC3 | FNDC4   | -0.358878592 | 8.64E-15    |
| PTCSC3 | FRMD3   | -0.026711833 | 0.57672218  |
| PTCSC3 | SHROOM4 | -0.270767022 | 8.16E-09    |
| PTCSC3 | NELL2   | -0.242155706 | 2.81E-07    |
| PTCSC3 | EPHB3   | -0.503834159 | 1.23E-29    |
| PTCSC3 | TMC6    | -0.567061963 | 1.03E-38    |
| PTCSC3 | NOD1    | -0.225960387 | 1.73E-06    |
| PTCSC3 | GGCT    | -0.284578272 | 1.27E-09    |
| PTCSC3 | ICAM1   | -0.354393418 | 1.95E-14    |
| PTCSC3 | PRSS23  | -0.364811072 | 2.89E-15    |
| PTCSC3 | CFI     | -0.33629195  | 4.56E-13    |
| PTCSC3 | CD55    | -0.416820551 | 7.03E-20    |
| PTCSC3 | RASD2   | -0.28378448  | 1.41E-09    |
| PTCSC3 | KLK11   | -0.236967062 | 5.10E-07    |
| PTCSC3 | ICAM5   | -0.285004563 | 1.19E-09    |
| PTCSC3 | ADORA1  | -0.251149386 | 9.67E-08    |
| PTCSC3 | ITGA2   | -0.39776537  | 4.29E-18    |
| PTCSC3 | ABCC3   | -0.194732389 | 3.99E-05    |
| PTCSC3 | MFGE8   | -0.297376236 | 2.05E-10    |
| PTCSC3 | STK32A  | -0.18088873  | 0.000138565 |
| PTCSC3 | CYSLTR2 | -0.265518765 | 1.61E-08    |

|        |           |              |             |
|--------|-----------|--------------|-------------|
| PTCSC3 | LAD1      | -0.405643927 | 8.10E-19    |
| PTCSC3 | MGAT3     | -0.400343615 | 2.50E-18    |
| PTCSC3 | IGFBP6    | -0.298656671 | 1.70E-10    |
| PTCSC3 | CYP2S1    | -0.482398667 | 5.74E-27    |
| PTCSC3 | KCNJ2     | -0.293166723 | 3.77E-10    |
| PTCSC3 | FAM20A    | -0.415418775 | 9.60E-20    |
| PTCSC3 | TGFA      | -0.266763456 | 1.37E-08    |
| PTCSC3 | MXRA8     | -0.363251927 | 3.86E-15    |
| PTCSC3 | C8orf4    | -0.37314684  | 5.96E-16    |
| PTCSC3 | CLDN10    | -0.308320697 | 4.02E-11    |
| PTCSC3 | PDE5A     | -0.236175923 | 5.58E-07    |
| PTCSC3 | APOE      | -0.270838154 | 8.09E-09    |
| PTCSC3 | SPOCK2    | -0.447824873 | 4.86E-23    |
| PTCSC3 | TENM1     | -0.110017819 | 0.021135242 |
| PTCSC3 | SLIT1     | -0.203711105 | 1.70E-05    |
| PTCSC3 | CXCL14    | -0.211573563 | 7.78E-06    |
| PTCSC3 | ECM1      | -0.229328948 | 1.20E-06    |
| PTCSC3 | DUSP5     | -0.434960102 | 1.09E-21    |
| PTCSC3 | SEZ6L2    | -0.428969682 | 4.44E-21    |
| PTCSC3 | THRSP     | -0.184113326 | 0.000104533 |
| PTCSC3 | C19orf33  | -0.481765861 | 6.83E-27    |
| PTCSC3 | MPZL2     | -0.323599228 | 3.69E-12    |
| PTCSC3 | CTSH      | -0.325131565 | 2.88E-12    |
| PTCSC3 | CYP1B1    | -0.257159877 | 4.63E-08    |
| PTCSC3 | ALOX5     | -0.400763523 | 2.29E-18    |
| PTCSC3 | SYTL5     | -0.378271642 | 2.21E-16    |
| PTCSC3 | TNFRSF12A | -0.300569912 | 1.29E-10    |
| PTCSC3 | DUSP6     | -0.310375255 | 2.94E-11    |
| PTCSC3 | ALOX15B   | -0.355226853 | 1.68E-14    |
| PTCSC3 | SDC4      | -0.32079681  | 5.78E-12    |
| PTCSC3 | MDK       | -0.355694915 | 1.54E-14    |
| PTCSC3 | KRT19     | -0.493765779 | 2.33E-28    |
| PTCSC3 | MET       | -0.378749549 | 2.01E-16    |
| PTCSC3 | TESC      | -0.248194138 | 1.38E-07    |
| PTCSC3 | CXCL17    | -0.279306904 | 2.61E-09    |
| PTCSC3 | NPC2      | -0.234478984 | 6.75E-07    |
| PTCSC3 | COMP      | -0.399050698 | 3.28E-18    |
| PTCSC3 | TUSC3     | -0.305586905 | 6.09E-11    |
| PTCSC3 | TMPRSS4   | -0.475090793 | 4.23E-26    |
| PTCSC3 | LGALS3    | -0.419398228 | 3.95E-20    |
| PTCSC3 | CRLF1     | -0.386317979 | 4.48E-17    |
| PTCSC3 | CTXN1     | -0.396424371 | 5.68E-18    |
| PTCSC3 | PCSK1N    | -0.40714194  | 5.87E-19    |
| PTCSC3 | NMU       | -0.430491159 | 3.12E-21    |
| PTCSC3 | GALE      | -0.447315677 | 5.51E-23    |
| PTCSC3 | PCSK2     | -0.199007076 | 2.67E-05    |
| PTCSC3 | GJB3      | -0.33849617  | 3.14E-13    |
| PTCSC3 | SLPI      | -0.46992402  | 1.69E-25    |
| PTCSC3 | AGR2      | -0.358076503 | 1.00E-14    |
| PTCSC3 | MRC2      | -0.336669095 | 4.28E-13    |
| PTCSC3 | GOLT1A    | -0.301415474 | 1.13E-10    |

|              |          |              |             |
|--------------|----------|--------------|-------------|
| PTCSC3       | SLC27A6  | -0.305944806 | 5.77E-11    |
| PTCSC3       | KCNN4    | -0.461162457 | 1.68E-24    |
| PTCSC3       | ETV4     | -0.390955428 | 1.75E-17    |
| PTCSC3       | SYT12    | -0.29728539  | 2.08E-10    |
| PTCSC3       | PVRL4    | -0.385791124 | 4.98E-17    |
| PTCSC3       | PLCD3    | -0.338599214 | 3.08E-13    |
| PTCSC3       | PLAU     | -0.381123193 | 1.26E-16    |
| PTCSC3       | LRRK2    | -0.229205905 | 1.21E-06    |
| PTCSC3       | SFN      | -0.417904967 | 5.52E-20    |
| PTCSC3       | LPAR5    | -0.293235018 | 3.74E-10    |
| PTCSC3       | NGEF     | -0.442309394 | 1.87E-22    |
| PTCSC3       | DTX4     | -0.217903187 | 4.06E-06    |
| PTCSC3       | CST6     | -0.299992777 | 1.40E-10    |
| PTCSC3       | QPCT     | -0.30980351  | 3.21E-11    |
| PTCSC3       | TIMP1    | -0.335510853 | 5.20E-13    |
| PTCSC3       | CAMK2N1  | -0.333709521 | 7.03E-13    |
| PTCSC3       | KLHDC8A  | -0.158335348 | 0.000871399 |
| PTCSC3       | PDLIM4   | -0.356963578 | 1.22E-14    |
| PTCSC3       | SCEL     | -0.335446104 | 5.25E-13    |
| PTCSC3       | LCN2     | -0.436712004 | 7.20E-22    |
| PTCSC3       | PROS1    | -0.307636948 | 4.46E-11    |
| PTCSC3       | GABRB2   | -0.233021678 | 7.95E-07    |
| PTCSC3       | TMPRSS6  | -0.392083091 | 1.39E-17    |
| PTCSC3       | KLK7     | -0.155670325 | 0.001066662 |
| PTCSC3       | PDZK1IP1 | -0.465631107 | 5.24E-25    |
| PTCSC3       | CDH3     | -0.362332397 | 4.58E-15    |
| PTCSC3       | LRP4     | -0.290368134 | 5.62E-10    |
| PTCSC3       | IGSF1    | -0.328520196 | 1.66E-12    |
| PTCSC3       | B3GNT3   | -0.466088319 | 4.65E-25    |
| PTCSC3       | CLDN1    | -0.416579853 | 7.42E-20    |
| PTCSC3       | GDF15    | -0.424575851 | 1.22E-20    |
| PTCSC3       | ARHGAP36 | -0.231434938 | 9.49E-07    |
| PTCSC3       | LAMB3    | -0.453682888 | 1.13E-23    |
| PTCSC3       | KLK10    | -0.233929294 | 7.18E-07    |
| PTCSC3       | DPP4     | -0.330716403 | 1.16E-12    |
| PTCSC3       | METTL7B  | -0.230520664 | 1.05E-06    |
| PTCSC3       | LIPH     | -0.45576066  | 6.67E-24    |
| PTCSC3       | CLDN16   | -0.400388364 | 2.48E-18    |
| PTCSC3       | CHI3L1   | -0.221787255 | 2.70E-06    |
| PTCSC3       | SLC22A31 | -0.402801901 | 1.49E-18    |
| PTCSC3       | TACSTD2  | -0.338301214 | 3.24E-13    |
| PTCSC3       | SFTPB    | -0.280867528 | 2.11E-09    |
| PTCSC3       | RXRG     | -0.179153139 | 0.000160944 |
| PTCSC3       | DCSTAMP  | -0.272037831 | 6.91E-09    |
| PTCSC3       | CITED1   | -0.140291821 | 0.003222871 |
| PTCSC3       | SERPINA1 | -0.405922707 | 7.63E-19    |
| PTCSC3       | PRR15    | -0.297754729 | 1.94E-10    |
| PTCSC3       | SLC34A2  | -0.312522882 | 2.11E-11    |
| PTCSC3       | FN1      | -0.451083439 | 2.16E-23    |
| PTCSC3       | ZCCHC12  | -0.19174693  | 5.26E-05    |
| RP3-340B19.3 | TFF3     | 0.506972572  | 0           |

|              |           |             |          |
|--------------|-----------|-------------|----------|
| RP3-340B19.3 | CCL21     | 0.33014377  | 1.27E-12 |
| RP3-340B19.3 | TPO       | 0.550445936 | 0        |
| RP3-340B19.3 | MT1G      | 0.568349186 | 0        |
| RP3-340B19.3 | DIO1      | 0.485617289 | 0        |
| RP3-340B19.3 | DPT       | 0.356249683 | 1.39E-14 |
| RP3-340B19.3 | CDH16     | 0.566954927 | 0        |
| RP3-340B19.3 | CRABP1    | 0.563357344 | 3.96E-38 |
| RP3-340B19.3 | SLC26A7   | 0.56313114  | 0        |
| RP3-340B19.3 | MT1H      | 0.555929155 | 5.65E-37 |
| RP3-340B19.3 | SLC26A4   | 0.57913902  | 0        |
| RP3-340B19.3 | SLC5A8    | 0.63037793  | 5.25E-50 |
| RP3-340B19.3 | PKHD1L1   | 0.489659112 | 7.51E-28 |
| RP3-340B19.3 | TFCP2L1   | 0.572299492 | 0        |
| RP3-340B19.3 | WSCD2     | 0.516417595 | 2.70E-31 |
| RP3-340B19.3 | IPCEF1    | 0.510921459 | 0        |
| RP3-340B19.3 | SLC5A5    | 0.455263244 | 7.57E-24 |
| RP3-340B19.3 | MT1F      | 0.547350057 | 0        |
| RP3-340B19.3 | FOSB      | 0.261707379 | 2.96E-08 |
| RP3-340B19.3 | SEMA3D    | 0.440855563 | 2.67E-22 |
| RP3-340B19.3 | BMP8A     | 0.403327641 | 0        |
| RP3-340B19.3 | MATN2     | 0.599311948 | 0        |
| RP3-340B19.3 | PLA2R1    | 0.522094254 | 0        |
| RP3-340B19.3 | COL23A1   | 0.612707614 | 0        |
| RP3-340B19.3 | HGD       | 0.591418712 | 0        |
| RP3-340B19.3 | TCEAL2    | 0.412987175 | 0        |
| RP3-340B19.3 | CHRDL1    | 0.300919966 | 1.22E-10 |
| RP3-340B19.3 | TNFRSF11B | 0.44247242  | 0        |
| RP3-340B19.3 | FAM167A   | 0.507403473 | 0        |
| RP3-340B19.3 | KIT       | 0.483449451 | 0        |
| RP3-340B19.3 | SLC4A4    | 0.546429676 | 0        |
| RP3-340B19.3 | SMOC2     | 0.355264285 | 2.19E-14 |
| RP3-340B19.3 | FHL1      | 0.498876083 | 0        |
| RP3-340B19.3 | OTOS      | 0.567775597 | 0        |
| RP3-340B19.3 | IGFBPL1   | 0.560404968 | 1.15E-37 |
| RP3-340B19.3 | HBB       | 0.274169898 | 6.03E-09 |
| RP3-340B19.3 | BEX1      | 0.363182627 | 4.70E-15 |
| RP3-340B19.3 | FABP4     | 0.384064936 | 7.04E-17 |
| RP3-340B19.3 | LMOD1     | 0.519354669 | 0        |
| RP3-340B19.3 | SOD3      | 0.489284063 | 0        |
| RP3-340B19.3 | TMEM171   | 0.609559255 | 0        |
| RP3-340B19.3 | PI16      | 0.348879061 | 7.04E-14 |
| RP3-340B19.3 | ZMAT4     | 0.501543609 | 2.42E-29 |
| RP3-340B19.3 | MFAP4     | 0.192029321 | 5.29E-05 |
| RP3-340B19.3 | CWH43     | 0.516918848 | 2.31E-31 |
| RP3-340B19.3 | SPX       | 0.514992752 | 0        |
| RP3-340B19.3 | APOD      | 0.222005464 | 2.80E-06 |
| RP3-340B19.3 | DPP6      | 0.498743323 | 0        |
| RP3-340B19.3 | MMRN1     | 0.381430966 | 2.73E-17 |
| RP3-340B19.3 | WDR72     | 0.564359307 | 0        |
| RP3-340B19.3 | MPPED2    | 0.514075917 | 0        |
| RP3-340B19.3 | PAPSS2    | 0.380598241 | 4.39E-17 |

|              |            |             |          |
|--------------|------------|-------------|----------|
| RP3-340B19.3 | DCN        | 0.218959227 | 3.85E-06 |
| RP3-340B19.3 | SORBS2     | 0.521414286 | 0        |
| RP3-340B19.3 | EGR2       | 0.291975139 | 5.41E-10 |
| RP3-340B19.3 | EDN3       | 0.354010838 | 2.09E-14 |
| RP3-340B19.3 | DIO2       | 0.535091783 | 0        |
| RP3-340B19.3 | ITPR1      | 0.446494921 | 0        |
| RP3-340B19.3 | CFD        | 0.248644321 | 1.44E-07 |
| RP3-340B19.3 | CPXM1      | 0.271918376 | 8.08E-09 |
| RP3-340B19.3 | ELMO1      | 0.435258725 | 0        |
| RP3-340B19.3 | GPC3       | 0.365161622 | 2.71E-15 |
| RP3-340B19.3 | MYOC       | 0.18828716  | 7.21E-05 |
| RP3-340B19.3 | DEPTOR     | 0.454691689 | 0        |
| RP3-340B19.3 | DGKI       | 0.460942451 | 0        |
| RP3-340B19.3 | CARTPT     | 0.529041947 | 4.99E-33 |
| RP3-340B19.3 | IYD        | 0.579203272 | 0        |
| RP3-340B19.3 | LYVE1      | 0.295832116 | 3.14E-10 |
| RP3-340B19.3 | CLCNKB     | 0.522137514 | 0        |
| RP3-340B19.3 | NCAM1      | 0.471830295 | 0        |
| RP3-340B19.3 | HBA2       | 0.212443372 | 7.49E-06 |
| RP3-340B19.3 | GLT8D2     | 0.432629065 | 0        |
| RP3-340B19.3 | OGDHL      | 0.59797953  | 0        |
| RP3-340B19.3 | LIFR       | 0.428461464 | 0        |
| RP3-340B19.3 | CSGALNACT1 | 0.510245322 | 0        |
| RP3-340B19.3 | RAP1GAP    | 0.604029451 | 0        |
| RP3-340B19.3 | COL9A3     | 0.402826672 | 0        |
| RP3-340B19.3 | FBLN1      | 0.202581436 | 1.97E-05 |
| RP3-340B19.3 | EFEMP1     | 0.352428819 | 3.70E-14 |
| RP3-340B19.3 | AOX1       | 0.422903024 | 1.79E-20 |
| RP3-340B19.3 | GRIN2C     | 0.551203063 | 0        |
| RP3-340B19.3 | C11orf74   | 0.542948851 | 0        |
| RP3-340B19.3 | PPARGC1A   | 0.585585802 | 0        |
| RP3-340B19.3 | ANGPTL1    | 0.409555284 | 0        |
| RP3-340B19.3 | SCARA5     | 0.300852379 | 1.23E-10 |
| RP3-340B19.3 | LTF        | 0.415073316 | 0        |
| RP3-340B19.3 | CA4        | 0.407159303 | 5.85E-19 |
| RP3-340B19.3 | TG         | 0.489727446 | 0        |
| RP3-340B19.3 | FCGBP      | 0.445451567 | 0        |
| RP3-340B19.3 | PBX4       | 0.465050338 | 0        |
| RP3-340B19.3 | CYR61      | 0.261764965 | 2.93E-08 |
| RP3-340B19.3 | FOS        | 0.265447766 | 1.85E-08 |
| RP3-340B19.3 | KHDRBS2    | 0.418988162 | 0        |
| RP3-340B19.3 | MUM1L1     | 0.385089088 | 0        |
| RP3-340B19.3 | RGS16      | 0.540067997 | 0        |
| RP3-340B19.3 | MT1M       | 0.434720595 | 0        |
| RP3-340B19.3 | LRP2       | 0.529688355 | 0        |
| RP3-340B19.3 | MAFB       | 0.472960169 | 0        |
| RP3-340B19.3 | KCNK2      | 0.400243393 | 0        |
| RP3-340B19.3 | TBC1D4     | 0.417255196 | 0        |
| RP3-340B19.3 | MIOX       | 0.499921085 | 3.89E-29 |
| RP3-340B19.3 | TPPP       | 0.512298698 | 0        |
| RP3-340B19.3 | FMOD       | 0.51577314  | 0        |



|              |          |             |             |
|--------------|----------|-------------|-------------|
| RP3-340B19.3 | CITED2   | 0.366129435 | 2.55E-15    |
| RP3-340B19.3 | RGS8     | 0.490902965 | 5.27E-28    |
| RP3-340B19.3 | ABI3BP   | 0.412708181 | 0           |
| RP3-340B19.3 | ADH1B    | 0.321632787 | 5.05E-12    |
| RP3-340B19.3 | OGN      | 0.252642269 | 8.07E-08    |
| RP3-340B19.3 | NR4A1    | 0.189566744 | 6.61E-05    |
| RP3-340B19.3 | FOXJ1    | 0.383959832 | 7.19E-17    |
| RP3-340B19.3 | ALDH1A1  | 0.505005149 | 0           |
| RP3-340B19.3 | OCA2     | 0.358614553 | 9.07E-15    |
| RP3-340B19.3 | TMEM139  | 0.398554112 | 0           |
| RP3-340B19.3 | ARHGAP24 | 0.552590372 | 0           |
| RP3-340B19.3 | SLC25A15 | 0.512305931 | 0           |
| RP3-340B19.3 | DES      | 0.273261512 | 5.87E-09    |
| RP3-340B19.3 | GDF10    | 0.395003751 | 7.63E-18    |
| RP3-340B19.3 | KIAA1324 | 0.453999523 | 0           |
| RP3-340B19.3 | JUN      | 0.311511076 | 3.15E-11    |
| RP3-340B19.3 | C7       | 0.171251599 | 0.000318685 |
| RP3-340B19.3 | LGI3     | 0.537727542 | 0           |
| RP3-340B19.3 | CDON     | 0.469391263 | 0           |
| RP3-340B19.3 | BCL2     | 0.533637952 | 0           |
| RP3-340B19.3 | HLF      | 0.458192229 | 0           |
| RP3-340B19.3 | EGR1     | 0.289380087 | 7.76E-10    |
| RP3-340B19.3 | IP6K3    | 0.481099209 | 0           |
| RP3-340B19.3 | SCUBE3   | 0.433365483 | 0           |
| RP3-340B19.3 | PKNOX2   | 0.357234687 | 1.51E-14    |
| RP3-340B19.3 | SMAD9    | 0.412655702 | 0           |
| RP3-340B19.3 | IQGAP2   | 0.503646349 | 0           |
| RP3-340B19.3 | GNA14    | 0.469393816 | 0           |
| RP3-340B19.3 | LAYN     | 0.343152954 | 1.93E-13    |
| RP3-340B19.3 | AVPR1A   | 0.431263031 | 0           |
| RP3-340B19.3 | PDLIM3   | 0.394880531 | 0           |
| RP3-340B19.3 | GPM6A    | 0.541995847 | 0           |
| RP3-340B19.3 | SDPR     | 0.391233047 | 0           |
| RP3-340B19.3 | CRYAB    | 0.469385306 | 0           |
| RP3-340B19.3 | FOXA2    | 0.376078922 | 3.39E-16    |
| RP3-340B19.3 | C8orf88  | 0.447096594 | 0           |
| RP3-340B19.3 | ISM1     | 0.389650712 | 0           |
| RP3-340B19.3 | BMP2     | 0.296668388 | 2.78E-10    |
| RP3-340B19.3 | ID4      | 0.436451859 | 0           |
| RP3-340B19.3 | NUPR1    | 0.52683289  | 0           |
| RP3-340B19.3 | SERTM1   | 0.458347248 | 3.45E-24    |
| RP3-340B19.3 | IRS1     | 0.464757019 | 0           |
| RP3-340B19.3 | FIBIN    | 0.377680084 | 1.40E-16    |
| RP3-340B19.3 | PODN     | 0.225133114 | 2.01E-06    |
| RP3-340B19.3 | TDRD9    | 0.476985365 | 0           |
| RP3-340B19.3 | EPHA3    | 0.301759206 | 1.34E-10    |
| RP3-340B19.3 | AIF1L    | 0.40725114  | 0           |
| RP3-340B19.3 | EBF4     | 0.386561215 | 0           |
| RP3-340B19.3 | ADM2     | 0.489172153 | 0           |
| RP3-340B19.3 | GSTM3    | 0.497932582 | 0           |
| RP3-340B19.3 | HSD17B6  | 0.377891137 | 1.31E-16    |

|              |          |             |             |
|--------------|----------|-------------|-------------|
| RP3-340B19.3 | AGR3     | 0.294783878 | 2.99E-10    |
| RP3-340B19.3 | EPHB1    | 0.50225209  | 0           |
| RP3-340B19.3 | TMOD1    | 0.40754687  | 0           |
| RP3-340B19.3 | WASF3    | 0.531217643 | 0           |
| RP3-340B19.3 | SELV     | 0.50947275  | 2.26E-30    |
| RP3-340B19.3 | ENPP1    | 0.611717733 | 0           |
| RP3-340B19.3 | SYNE1    | 0.469012149 | 2.15E-25    |
| RP3-340B19.3 | PLCH1    | 0.461614617 | 0           |
| RP3-340B19.3 | CCDC146  | 0.444128936 | 0           |
| RP3-340B19.3 | SLC16A2  | 0.447477994 | 0           |
| RP3-340B19.3 | IER2     | 0.330275136 | 1.67E-12    |
| RP3-340B19.3 | KCNAB1   | 0.350476431 | 5.28E-14    |
| RP3-340B19.3 | SYNDIG1  | 0.381511672 | 2.59E-17    |
| RP3-340B19.3 | C16orf89 | 0.541679125 | 0           |
| RP3-340B19.3 | CTGF     | 0.154197528 | 0.00120519  |
| RP3-340B19.3 | NR4A3    | 0.128916336 | 0.006870022 |
| RP3-340B19.3 | KIAA1456 | 0.549852631 | 0           |
| RP3-340B19.3 | AQP4     | 0.507659914 | 0           |
| RP3-340B19.3 | RNF150   | 0.370134774 | 1.05E-15    |
| RP3-340B19.3 | C1S      | 0.161912475 | 0.000670784 |
| RP3-340B19.3 | PFKFB2   | 0.576138456 | 0           |
| RP3-340B19.3 | PROX1    | 0.464636599 | 0           |
| RP3-340B19.3 | TCF7L1   | 0.392455967 | 0           |
| RP3-340B19.3 | HSPB6    | 0.219237086 | 3.74E-06    |
| RP3-340B19.3 | FHDC1    | 0.531191687 | 0           |
| RP3-340B19.3 | PRR15L   | 0.565260966 | 0           |
| RP3-340B19.3 | SLC1A1   | 0.592238672 | 0           |
| RP3-340B19.3 | BTBD11   | 0.434932074 | 0           |
| RP3-340B19.3 | TRIM58   | 0.501270861 | 0           |
| RP3-340B19.3 | LRIG1    | 0.494772167 | 0           |
| RP3-340B19.3 | ROR2     | 0.343218341 | 1.90E-13    |
| RP3-340B19.3 | GPR125   | 0.44618217  | 0           |
| RP3-340B19.3 | FLRT1    | 0.424966597 | 0           |
| RP3-340B19.3 | PGF      | 0.367274486 | 1.99E-15    |
| RP3-340B19.3 | DUSP1    | 0.220152361 | 3.40E-06    |
| RP3-340B19.3 | PLA2G7   | 0.279265113 | 3.07E-09    |
| RP3-340B19.3 | PLSCR4   | 0.443958873 | 0           |
| RP3-340B19.3 | FAM46B   | 0.458849928 | 0           |
| RP3-340B19.3 | GLDC     | 0.363820752 | 4.12E-15    |
| RP3-340B19.3 | ZBTB16   | 0.391274747 | 0           |
| RP3-340B19.3 | OMD      | 0.21980175  | 3.33E-06    |
| RP3-340B19.3 | HSD11B2  | 0.399109263 | 0           |
| RP3-340B19.3 | FGL2     | 0.213561757 | 6.69E-06    |
| RP3-340B19.3 | CLCNKA   | 0.51897116  | 1.22E-31    |
| RP3-340B19.3 | GATM     | 0.544049791 | 0           |
| RP3-340B19.3 | TNS3     | 0.414810066 | 0           |
| RP3-340B19.3 | TOB1     | 0.299358045 | 1.89E-10    |
| RP3-340B19.3 | MARC2    | 0.557336951 | 0           |
| RP3-340B19.3 | LRRC2    | 0.582535594 | 0           |
| RP3-340B19.3 | SORD     | 0.447461257 | 0           |
| RP3-340B19.3 | RIMS4    | 0.413323896 | 0           |

|              |          |             |             |
|--------------|----------|-------------|-------------|
| RP3-340B19.3 | SLC29A4  | 0.383710289 | 0           |
| RP3-340B19.3 | SLC39A14 | 0.456317284 | 0           |
| RP3-340B19.3 | FAXDC2   | 0.497219425 | 0           |
| RP3-340B19.3 | HSPB8    | 0.40686208  | 0           |
| RP3-340B19.3 | CCL19    | 0.084075825 | 0.078462352 |
| RP3-340B19.3 | KCNIP3   | 0.470790345 | 0           |
| RP3-340B19.3 | CGNL1    | 0.504885864 | 0           |
| RP3-340B19.3 | ATF3     | 0.083631144 | 0.080063481 |
| RP3-340B19.3 | SGCD     | 0.375134391 | 3.01E-16    |
| RP3-340B19.3 | STARD13  | 0.382264543 | 1.42E-17    |
| RP3-340B19.3 | LDHD     | 0.601968841 | 0           |
| RP3-340B19.3 | RCAN1    | 0.266024759 | 1.72E-08    |
| RP3-340B19.3 | ID3      | 0.352076354 | 3.95E-14    |
| RP3-340B19.3 | SYTL3    | 0.540303305 | 0           |
| RP3-340B19.3 | MT1E     | 0.439636103 | 0           |
| RP3-340B19.3 | CAMK1D   | 0.407777214 | 0           |
| RP3-340B19.3 | PRKCQ    | 0.523097468 | 0           |
| RP3-340B19.3 | NUAK2    | 0.397213468 | 0           |
| RP3-340B19.3 | LIPG     | 0.462802503 | 0           |
| RP3-340B19.3 | SLC25A25 | 0.354101646 | 2.72E-14    |
| RP3-340B19.3 | PRKX     | 0.317470221 | 1.27E-11    |
| RP3-340B19.3 | SRPX     | 0.141229926 | 0.003044879 |
| RP3-340B19.3 | FAM189A1 | 0.377570443 | 1.45E-16    |
| RP3-340B19.3 | PLEKHH1  | 0.471719804 | 0           |
| RP3-340B19.3 | WNT11    | 0.31535855  | 1.76E-11    |
| RP3-340B19.3 | SNAI1    | 0.231102046 | 1.06E-06    |
| RP3-340B19.3 | FDCSP    | 0.102956026 | 0.031024978 |
| RP3-340B19.3 | MT1X     | 0.410764304 | 0           |
| RP3-340B19.3 | ACACB    | 0.515420249 | 0           |
| RP3-340B19.3 | ARC      | 0.142239523 | 0.002840252 |
| RP3-340B19.3 | KLK4     | 0.400525936 | 2.41E-18    |
| RP3-340B19.3 | ZFPM2    | 0.256784637 | 5.42E-08    |
| RP3-340B19.3 | AKAP12   | 0.273098744 | 6.93E-09    |
| RP3-340B19.3 | GJB6     | 0.352318236 | 2.83E-14    |
| RP3-340B19.3 | ERO1LB   | 0.426745802 | 0           |
| RP3-340B19.3 | DNALI1   | 0.38598791  | 0           |
| RP3-340B19.3 | HKDC1    | 0.423983666 | 0           |
| RP3-340B19.3 | ZFP36L2  | 0.385725795 | 0           |
| RP3-340B19.3 | CAPSL    | 0.432774347 | 1.83E-21    |
| RP3-340B19.3 | CYP7B1   | 0.417192362 | 0           |
| RP3-340B19.3 | CPQ      | 0.433415268 | 0           |
| RP3-340B19.3 | RPS6KA6  | 0.401266549 | 2.06E-18    |
| RP3-340B19.3 | TLE1     | 0.37864486  | 1.00E-16    |
| RP3-340B19.3 | TP53INP2 | 0.403898677 | 0           |
| RP3-340B19.3 | KATNAL2  | 0.518593855 | 0           |
| RP3-340B19.3 | SGPP2    | 0.373728217 | 4.39E-16    |
| RP3-340B19.3 | CTH      | 0.527939504 | 0           |
| RP3-340B19.3 | KIF12    | 0.334663009 | 8.11E-13    |
| RP3-340B19.3 | TMEM220  | 0.576460852 | 0           |
| RP3-340B19.3 | CENPJ    | 0.446682997 | 0           |
| RP3-340B19.3 | FAM155B  | 0.26916943  | 1.15E-08    |

|              |          |             |             |
|--------------|----------|-------------|-------------|
| RP3-340B19.3 | WFS1     | 0.486522778 | 0           |
| RP3-340B19.3 | SELENBP1 | 0.502824545 | 0           |
| RP3-340B19.3 | SNTA1    | 0.620917289 | 0           |
| RP3-340B19.3 | FRAS1    | 0.319308005 | 9.55E-12    |
| RP3-340B19.3 | FBLN7    | 0.570893035 | 0           |
| RP3-340B19.3 | AGPAT9   | 0.46723775  | 0           |
| RP3-340B19.3 | GPR83    | 0.395083074 | 0           |
| RP3-340B19.3 | PRTG     | 0.432952595 | 0           |
| RP3-340B19.3 | EGR3     | 0.078898181 | 0.098734675 |
| RP3-340B19.3 | GRAMD2   | 0.414586531 | 0           |
| RP3-340B19.3 | HYOU1    | 0.399091817 | 0           |
| RP3-340B19.3 | FBLN5    | 0.235566228 | 6.45E-07    |
| RP3-340B19.3 | ITM2A    | 0.332341135 | 1.19E-12    |
| RP3-340B19.3 | SRF      | 0.2628208   | 2.57E-08    |
| RP3-340B19.3 | FGFR2    | 0.308412786 | 5.02E-11    |
| RP3-340B19.3 | MT1A     | 0.252670022 | 8.04E-08    |
| RP3-340B19.3 | MAMDC2   | 0.309102114 | 4.53E-11    |
| RP3-340B19.3 | FHL2     | 0.269644301 | 1.08E-08    |
| RP3-340B19.3 | FTCDNL1  | 0.588045967 | 0           |
| RP3-340B19.3 | PKIA     | 0.285680832 | 1.29E-09    |
| RP3-340B19.3 | DNAJB4   | 0.302217907 | 1.25E-10    |
| RP3-340B19.3 | SLC25A33 | 0.442911406 | 0           |
| RP3-340B19.3 | EYA2     | 0.447042412 | 0           |
| RP3-340B19.3 | LPAR1    | 0.250990307 | 1.09E-07    |
| RP3-340B19.3 | STX11    | 0.478123325 | 0           |
| RP3-340B19.3 | ARHGEF28 | 0.539581779 | 0           |
| RP3-340B19.3 | OR2W3    | 0.514280162 | 0           |
| RP3-340B19.3 | ALDH1B1  | 0.41757399  | 5.94E-20    |
| RP3-340B19.3 | CXCL12   | 0.181847117 | 0.000130704 |
| RP3-340B19.3 | OLFM2    | 0.272033973 | 7.96E-09    |
| RP3-340B19.3 | TUB      | 0.388624095 | 0           |
| RP3-340B19.3 | HTRA3    | 0.174071038 | 0.000252632 |
| RP3-340B19.3 | CKB      | 0.406383806 | 0           |
| RP3-340B19.3 | RGS2     | 0.105769367 | 0.026730837 |
| RP3-340B19.3 | SHANK2   | 0.434335649 | 0           |
| RP3-340B19.3 | CNTFR    | 0.390351009 | 1.98E-17    |
| RP3-340B19.3 | CYTH3    | 0.445036977 | 0           |
| RP3-340B19.3 | PLAC9    | 0.213114687 | 7.00E-06    |
| RP3-340B19.3 | WWOX     | 0.496401876 | 0           |
| RP3-340B19.3 | NPR3     | 0.304094838 | 9.51E-11    |
| RP3-340B19.3 | SDC2     | 0.326110088 | 3.27E-12    |
| RP3-340B19.3 | KLF15    | 0.44754409  | 0           |
| RP3-340B19.3 | TMEM164  | 0.466249004 | 0           |
| RP3-340B19.3 | LONRF3   | 0.344432609 | 1.54E-13    |
| RP3-340B19.3 | GBP1     | 0.230689584 | 1.11E-06    |
| RP3-340B19.3 | ARHGAP6  | 0.480860923 | 0           |
| RP3-340B19.3 | TMEM119  | 0.121294434 | 0.011011548 |
| RP3-340B19.3 | SH3RF1   | 0.4185757   | 0           |
| RP3-340B19.3 | CRELD2   | 0.394434311 | 0           |
| RP3-340B19.3 | PCP4     | 0.227358255 | 1.59E-06    |
| RP3-340B19.3 | GCSH     | 0.548590423 | 0           |

|              |          |             |             |
|--------------|----------|-------------|-------------|
| RP3-340B19.3 | IMPA2    | 0.407922029 | 0           |
| RP3-340B19.3 | C1R      | 0.132831892 | 0.005340721 |
| RP3-340B19.3 | SUCNR1   | 0.263713949 | 2.30E-08    |
| RP3-340B19.3 | SFRP1    | 0.319675079 | 9.02E-12    |
| RP3-340B19.3 | UGT8     | 0.471477971 | 0           |
| RP3-340B19.3 | TLE4     | 0.142770703 | 0.002737695 |
| RP3-340B19.3 | ANTXR1   | 0.247507071 | 1.64E-07    |
| RP3-340B19.3 | GPX3     | 0.452069546 | 0           |
| RP3-340B19.3 | DPY19L2  | 0.472197653 | 0           |
| RP3-340B19.3 | FAM46C   | 0.424708879 | 0           |
| RP3-340B19.3 | IL33     | 0.242429877 | 2.72E-07    |
| RP3-340B19.3 | PEG3     | 0.396312944 | 0           |
| RP3-340B19.3 | FAHD2A   | 0.542691558 | 0           |
| RP3-340B19.3 | PTGDS    | 0.050971868 | 0.286469909 |
| RP3-340B19.3 | CHCHD10  | 0.479728495 | 0           |
| RP3-340B19.3 | CD36     | 0.337004882 | 5.49E-13    |
| RP3-340B19.3 | ANKRD37  | 0.334069704 | 8.95E-13    |
| RP3-340B19.3 | TSPAN33  | 0.430689726 | 0           |
| RP3-340B19.3 | PRDM16   | 0.401558223 | 0           |
| RP3-340B19.3 | UST      | 0.467318597 | 0           |
| RP3-340B19.3 | NEXN     | 0.397745924 | 0           |
| RP3-340B19.3 | NUPR1L   | 0.270438259 | 8.52E-09    |
| RP3-340B19.3 | SLC24A3  | 0.443405992 | 0           |
| RP3-340B19.3 | MARC1    | 0.373081866 | 5.18E-16    |
| RP3-340B19.3 | MYH11    | 0.221418116 | 2.98E-06    |
| RP3-340B19.3 | APOA1    | 0.42777903  | 5.85E-21    |
| RP3-340B19.3 | TMEM178B | 0.294094469 | 4.01E-10    |
| RP3-340B19.3 | CAPNG    | 0.222212136 | 2.58E-06    |
| RP3-340B19.3 | PPM1L    | 0.403926477 | 0           |
| RP3-340B19.3 | FZD8     | 0.440917317 | 0           |
| RP3-340B19.3 | RCAN2    | 0.391842521 | 0           |
| RP3-340B19.3 | COPZ2    | 0.512764065 | 0           |
| RP3-340B19.3 | GAS1     | 0.242999912 | 2.78E-07    |
| RP3-340B19.3 | DACT1    | 0.308063299 | 5.29E-11    |
| RP3-340B19.3 | WBSCR17  | 0.398107609 | 0           |
| RP3-340B19.3 | NCS1     | 0.337037221 | 5.46E-13    |
| RP3-340B19.3 | SPIRE2   | 0.414804251 | 0           |
| RP3-340B19.3 | C15orf52 | 0.502549097 | 0           |
| RP3-340B19.3 | SPAG5    | 0.471015015 | 0           |
| RP3-340B19.3 | ARL4D    | 0.398879345 | 0           |
| RP3-340B19.3 | FAM189A2 | 0.390840016 | 0           |
| RP3-340B19.3 | MAP1LC3A | 0.4304808   | 0           |
| RP3-340B19.3 | KLF6     | 0.089941762 | 0.059729251 |
| RP3-340B19.3 | ADD3     | 0.339530434 | 3.58E-13    |
| RP3-340B19.3 | TSPAN7   | 0.308685822 | 4.82E-11    |
| RP3-340B19.3 | KLF9     | 0.254051578 | 7.55E-08    |
| RP3-340B19.3 | KCNQ1    | 0.546547684 | 0           |
| RP3-340B19.3 | MAN1A1   | 0.135457439 | 0.004494698 |
| RP3-340B19.3 | MLF1     | 0.290848101 | 6.33E-10    |
| RP3-340B19.3 | RARB     | 0.38648051  | 0           |
| RP3-340B19.3 | CDC42EP2 | 0.480614552 | 0           |

|              |          |              |             |
|--------------|----------|--------------|-------------|
| RP3-340B19.3 | FAM3B    | 0.346538607  | 1.07E-13    |
| RP3-340B19.3 | GADD45B  | 0.201662331  | 2.15E-05    |
| RP3-340B19.3 | TMEM47   | 0.308134359  | 5.23E-11    |
| RP3-340B19.3 | SDF2L1   | 0.314765813  | 1.92E-11    |
| RP3-340B19.3 | CCDC85A  | 0.271032461  | 9.06E-09    |
| RP3-340B19.3 | CRYBG3   | 0.271098841  | 8.98E-09    |
| RP3-340B19.3 | FBLN2    | 0.141011214  | 0.003090938 |
| RP3-340B19.3 | PEBP4    | 0.484212109  | 0           |
| RP3-340B19.3 | CDADC1   | 0.454258376  | 0           |
| RP3-340B19.3 | FAM63A   | 0.542719358  | 0           |
| RP3-340B19.3 | GLUL     | 0.375620325  | 2.63E-16    |
| RP3-340B19.3 | FREM2    | 0.53041286   | 0           |
| RP3-340B19.3 | ACKR3    | 0.285661259  | 1.30E-09    |
| RP3-340B19.3 | DENND6A  | 0.380082663  | 5.62E-17    |
| RP3-340B19.3 | CLDN8    | 0.299096214  | 1.97E-10    |
| RP3-340B19.3 | UTS2R    | 0.162939904  | 0.000609914 |
| RP3-340B19.3 | SCNN1B   | 0.321994826  | 6.27E-12    |
| RP3-340B19.3 | TTC30A   | 0.486325482  | 0           |
| RP3-340B19.3 | CORO2B   | 0.394544944  | 0           |
| RP3-340B19.3 | TC2N     | 0.346106287  | 1.15E-13    |
| RP3-340B19.3 | ALDH2    | 0.482039448  | 0           |
| RP3-340B19.3 | GPR183   | 0.085907914  | 0.072161006 |
| RP3-340B19.3 | C4orf47  | 0.412712295  | 0           |
| RP3-340B19.3 | SLC25A42 | 0.408992049  | 0           |
| RP3-340B19.3 | LGMN     | 0.527801354  | 0           |
| RP3-340B19.3 | ACSF2    | 0.5167382    | 0           |
| RP3-340B19.3 | KIAA1467 | 0.49954059   | 0           |
| RP3-340B19.3 | PRKG1    | 0.332972594  | 1.07E-12    |
| RP3-340B19.3 | GNAI1    | 0.407645872  | 0           |
| RP3-340B19.3 | ABCC4    | 0.319039224  | 9.96E-12    |
| RP3-340B19.3 | PRPS1    | 0.542877507  | 0           |
| RP3-340B19.3 | TSPAN5   | 0.437039207  | 0           |
| RP3-340B19.3 | CR2      | 0.19383224   | 4.34E-05    |
| RP3-340B19.3 | CCDC170  | 0.438076462  | 0           |
| RP3-340B19.3 | RRAD     | 0.056518976  | 0.237193752 |
| RP3-340B19.3 | SCGB2A1  | 0.487022754  | 0           |
| RP3-340B19.3 | SESN3    | 0.18807093   | 7.56E-05    |
| RP3-340B19.3 | SGK223   | 0.289629578  | 7.50E-10    |
| RP3-340B19.3 | NDRG2    | 0.466940318  | 0           |
| RP3-340B19.3 | C3orf52  | 0.266875215  | 1.54E-08    |
| RP3-340B19.3 | FLRT3    | -0.260414108 | 3.47E-08    |
| RP3-340B19.3 | MST1R    | -0.375135809 | 3.01E-16    |
| RP3-340B19.3 | SDC1     | -0.208387681 | 1.12E-05    |
| RP3-340B19.3 | ST8SIA4  | -0.374758097 | 3.34E-16    |
| RP3-340B19.3 | UBTD1    | -0.371846606 | 7.02E-16    |
| RP3-340B19.3 | EPHA2    | -0.389912969 | 0           |
| RP3-340B19.3 | TMEM130  | -0.467020314 | 0           |
| RP3-340B19.3 | SPINK2   | -0.195860058 | 3.72E-05    |
| RP3-340B19.3 | MMP16    | -0.408485974 | 0           |
| RP3-340B19.3 | SIGLEC15 | -0.450323956 | 0           |
| RP3-340B19.3 | RIN1     | -0.511963253 | 0           |

|              |          |              |             |
|--------------|----------|--------------|-------------|
| RP3-340B19.3 | IL1RN    | -0.248064774 | 1.54E-07    |
| RP3-340B19.3 | FCER1G   | -0.233012309 | 8.56E-07    |
| RP3-340B19.3 | CD276    | -0.547638695 | 0           |
| RP3-340B19.3 | CTSB     | -0.147194745 | 0.002005962 |
| RP3-340B19.3 | FAM171A2 | -0.341803658 | 2.43E-13    |
| RP3-340B19.3 | ASPHD1   | -0.358686957 | 1.14E-14    |
| RP3-340B19.3 | C15orf48 | -0.111815317 | 0.019147098 |
| RP3-340B19.3 | DYSF     | -0.330401513 | 1.63E-12    |
| RP3-340B19.3 | PDZRN4   | -0.298686304 | 2.09E-10    |
| RP3-340B19.3 | EFHD2    | -0.293767393 | 4.20E-10    |
| RP3-340B19.3 | ASF1B    | -0.234509541 | 7.26E-07    |
| RP3-340B19.3 | AQP1     | -0.261349665 | 3.09E-08    |
| RP3-340B19.3 | ARRDC2   | -0.455118051 | 0           |
| RP3-340B19.3 | PRSS1    | -0.304222294 | 7.47E-11    |
| RP3-340B19.3 | MAPK13   | -0.300515294 | 1.60E-10    |
| RP3-340B19.3 | CST5     | -0.431551225 | 2.43E-21    |
| RP3-340B19.3 | AHR      | -0.489109603 | 0           |
| RP3-340B19.3 | BAX      | -0.344064542 | 1.64E-13    |
| RP3-340B19.3 | C1orf115 | -0.284931365 | 1.43E-09    |
| RP3-340B19.3 | PLK3     | -0.415339969 | 0           |
| RP3-340B19.3 | JAG2     | -0.379028245 | 8.70E-17    |
| RP3-340B19.3 | RAD23B   | -0.397348497 | 0           |
| RP3-340B19.3 | CA12     | -0.002185001 | 0.963575095 |
| RP3-340B19.3 | ADTRP    | -0.380381939 | 4.89E-17    |
| RP3-340B19.3 | UCP2     | -0.36619468  | 2.51E-15    |
| RP3-340B19.3 | IGFBP2   | -0.426325823 | 0           |
| RP3-340B19.3 | LOXL2    | -0.41637382  | 0           |
| RP3-340B19.3 | GPX1     | -0.288731324 | 8.49E-10    |
| RP3-340B19.3 | P3H3     | -0.424961491 | 0           |
| RP3-340B19.3 | C2orf81  | -0.456195304 | 0           |
| RP3-340B19.3 | CDT1     | -0.277413572 | 3.93E-09    |
| RP3-340B19.3 | SNX25    | -0.355046423 | 2.28E-14    |
| RP3-340B19.3 | MTHFD1L  | -0.430127341 | 0           |
| RP3-340B19.3 | CDC42BPG | -0.404931053 | 9.43E-19    |
| RP3-340B19.3 | MSN      | -0.409356428 | 0           |
| RP3-340B19.3 | SIGLEC6  | -0.36282282  | 4.18E-15    |
| RP3-340B19.3 | F2R      | -0.330421086 | 1.63E-12    |
| RP3-340B19.3 | TMEM184A | -0.453334307 | 0           |
| RP3-340B19.3 | CKS2     | -0.202822843 | 1.93E-05    |
| RP3-340B19.3 | TAX1BP3  | -0.474022104 | 0           |
| RP3-340B19.3 | PMEPA1   | -0.503275445 | 0           |
| RP3-340B19.3 | CXCL16   | -0.354351705 | 2.60E-14    |
| RP3-340B19.3 | FAXC     | -0.505543988 | 0           |
| RP3-340B19.3 | VTCN1    | -0.384875946 | 5.99E-17    |
| RP3-340B19.3 | SH2D4A   | -0.434309977 | 0           |
| RP3-340B19.3 | RNF24    | -0.463032988 | 0           |
| RP3-340B19.3 | LY6G6C   | -0.346740706 | 7.57E-14    |
| RP3-340B19.3 | NID1     | -0.399814477 | 0           |
| RP3-340B19.3 | STAC     | -0.441542819 | 0           |
| RP3-340B19.3 | RAB34    | -0.471131747 | 0           |
| RP3-340B19.3 | HES4     | -0.374390171 | 3.69E-16    |

|              |          |              |             |
|--------------|----------|--------------|-------------|
| RP3-340B19.3 | EPHA10   | -0.392100665 | 0           |
| RP3-340B19.3 | ENTPD2   | -0.483566041 | 0           |
| RP3-340B19.3 | DDB2     | -0.366346871 | 2.43E-15    |
| RP3-340B19.3 | NKAIN4   | -0.418244368 | 0           |
| RP3-340B19.3 | TRIM29   | -0.482880542 | 0           |
| RP3-340B19.3 | ADCY8    | -0.370551341 | 9.80E-16    |
| RP3-340B19.3 | SFTA2    | -0.087517198 | 0.066969019 |
| RP3-340B19.3 | NRIP1    | -0.506431888 | 0           |
| RP3-340B19.3 | VWA1     | -0.319522037 | 9.24E-12    |
| RP3-340B19.3 | APLNR    | -0.262589606 | 2.65E-08    |
| RP3-340B19.3 | REN      | -0.373585652 | 5.48E-16    |
| RP3-340B19.3 | EDIL3    | -0.355616892 | 2.05E-14    |
| RP3-340B19.3 | AGRN     | -0.422123188 | 0           |
| RP3-340B19.3 | TREM1    | -0.315930154 | 1.61E-11    |
| RP3-340B19.3 | SRL      | -0.193417197 | 4.66E-05    |
| RP3-340B19.3 | RASGRF1  | -0.513272551 | 0           |
| RP3-340B19.3 | RMI2     | -0.395287887 | 0           |
| RP3-340B19.3 | SAMD1    | -0.46665097  | 0           |
| RP3-340B19.3 | MGAT4B   | -0.457260501 | 0           |
| RP3-340B19.3 | NXN      | -0.497676282 | 0           |
| RP3-340B19.3 | SH3BGRL3 | -0.352721571 | 3.51E-14    |
| RP3-340B19.3 | CA11     | -0.320593617 | 7.81E-12    |
| RP3-340B19.3 | PLD3     | -0.336345198 | 6.13E-13    |
| RP3-340B19.3 | LURAP1L  | -0.25914041  | 4.06E-08    |
| RP3-340B19.3 | CARNS1   | -0.283959213 | 1.63E-09    |
| RP3-340B19.3 | PDLIM7   | -0.492796659 | 0           |
| RP3-340B19.3 | BCL2L1   | -0.426298874 | 0           |
| RP3-340B19.3 | GGT6     | -0.317839565 | 1.20E-11    |
| RP3-340B19.3 | DPYSL3   | -0.308095496 | 5.26E-11    |
| RP3-340B19.3 | FYN      | -0.549506832 | 0           |
| RP3-340B19.3 | TK1      | -0.207164052 | 1.26E-05    |
| RP3-340B19.3 | AK1      | -0.235036041 | 6.84E-07    |
| RP3-340B19.3 | HIGD1B   | -0.232606513 | 8.96E-07    |
| RP3-340B19.3 | TMEM59L  | -0.442630852 | 0           |
| RP3-340B19.3 | MEGF9    | -0.270033218 | 1.03E-08    |
| RP3-340B19.3 | ZFP36L1  | -0.404832391 | 0           |
| RP3-340B19.3 | ADRA1B   | -0.302402012 | 1.22E-10    |
| RP3-340B19.3 | EPHA4    | -0.369692525 | 1.16E-15    |
| RP3-340B19.3 | TCERG1L  | -0.239544334 | 4.12E-07    |
| RP3-340B19.3 | NGFR     | -0.316767276 | 1.42E-11    |
| RP3-340B19.3 | EBI3     | -0.305931061 | 7.26E-11    |
| RP3-340B19.3 | S100A10  | -0.376878704 | 1.81E-16    |
| RP3-340B19.3 | S100B    | -0.280917658 | 2.46E-09    |
| RP3-340B19.3 | CD44     | -0.38140345  | 2.78E-17    |
| RP3-340B19.3 | BHLHE41  | -0.374805187 | 3.30E-16    |
| RP3-340B19.3 | FBXO2    | -0.339980625 | 3.32E-13    |
| RP3-340B19.3 | SLC30A2  | -0.092740634 | 0.052189584 |
| RP3-340B19.3 | FRMD5    | -0.268887883 | 1.19E-08    |
| RP3-340B19.3 | SAMD11   | -0.425581603 | 0           |
| RP3-340B19.3 | SIPAIL2  | -0.526197744 | 0           |
| RP3-340B19.3 | S100A16  | -0.385812599 | 0           |



|              |          |              |             |
|--------------|----------|--------------|-------------|
| RP3-340B19.3 | PPL      | -0.356998811 | 1.58E-14    |
| RP3-340B19.3 | ARHGD1B  | -0.271699521 | 8.31E-09    |
| RP3-340B19.3 | CDC42EP3 | -0.361404131 | 6.71E-15    |
| RP3-340B19.3 | RUNX2    | -0.522381474 | 0           |
| RP3-340B19.3 | LAMC2    | -0.366733377 | 2.24E-15    |
| RP3-340B19.3 | BRINP1   | -0.475789536 | 0           |
| RP3-340B19.3 | GPRC5B   | -0.33058661  | 1.59E-12    |
| RP3-340B19.3 | AQP5     | -0.283756103 | 1.68E-09    |
| RP3-340B19.3 | PLAG1    | -0.486592987 | 0           |
| RP3-340B19.3 | PTPRU    | -0.472733655 | 0           |
| RP3-340B19.3 | ANGPTL4  | -0.312305364 | 2.80E-11    |
| RP3-340B19.3 | PALM3    | -0.264857723 | 1.99E-08    |
| RP3-340B19.3 | ACP5     | -0.245116264 | 2.17E-07    |
| RP3-340B19.3 | DLG4     | -0.439589155 | 0           |
| RP3-340B19.3 | ETNK2    | -0.397861096 | 0           |
| RP3-340B19.3 | CD109    | -0.527134862 | 0           |
| RP3-340B19.3 | SNX22    | -0.29377718  | 4.20E-10    |
| RP3-340B19.3 | TMEM98   | -0.391464241 | 0           |
| RP3-340B19.3 | CTHRC1   | -0.369057521 | 1.34E-15    |
| RP3-340B19.3 | S100A2   | -0.301154271 | 1.46E-10    |
| RP3-340B19.3 | C11orf80 | -0.467626951 | 0           |
| RP3-340B19.3 | SREBF1   | -0.364562702 | 3.54E-15    |
| RP3-340B19.3 | PRSS22   | -0.464843823 | 0           |
| RP3-340B19.3 | CMTM3    | -0.499544135 | 0           |
| RP3-340B19.3 | RDH5     | -0.334932358 | 7.76E-13    |
| RP3-340B19.3 | MYH10    | -0.385288085 | 0           |
| RP3-340B19.3 | EVPL     | -0.439522775 | 0           |
| RP3-340B19.3 | SCD      | -0.417061021 | 0           |
| RP3-340B19.3 | CD151    | -0.492270869 | 0           |
| RP3-340B19.3 | S100A4   | -0.425566285 | 0           |
| RP3-340B19.3 | BNIP1    | -0.331781446 | 1.30E-12    |
| RP3-340B19.3 | MAP3K6   | -0.381790807 | 2.13E-17    |
| RP3-340B19.3 | MANEAL   | -0.244326515 | 2.38E-07    |
| RP3-340B19.3 | CD207    | -0.308207341 | 4.09E-11    |
| RP3-340B19.3 | CD1A     | -0.323031927 | 4.04E-12    |
| RP3-340B19.3 | C3       | -0.397225666 | 0           |
| RP3-340B19.3 | NT5E     | -0.393106148 | 0           |
| RP3-340B19.3 | CACNG4   | -0.479218931 | 1.38E-26    |
| RP3-340B19.3 | FHOD1    | -0.401061651 | 0           |
| RP3-340B19.3 | LEMD1    | -0.459128921 | 0           |
| RP3-340B19.3 | ATP11A   | -0.302980424 | 1.12E-10    |
| RP3-340B19.3 | PPAP2C   | -0.383070036 | 4.16E-18    |
| RP3-340B19.3 | DRAM1    | -0.463665298 | 0           |
| RP3-340B19.3 | CDA      | -0.325715214 | 3.48E-12    |
| RP3-340B19.3 | CCND2    | -0.327837381 | 2.48E-12    |
| RP3-340B19.3 | LCN6     | -0.298000533 | 1.87E-10    |
| RP3-340B19.3 | CDH4     | -0.368504923 | 1.52E-15    |
| RP3-340B19.3 | MMP11    | -0.428957469 | 0           |
| RP3-340B19.3 | B3GAT1   | -0.313136955 | 2.47E-11    |
| RP3-340B19.3 | SPP1     | -0.173829205 | 0.000257751 |
| RP3-340B19.3 | HLA-DQB1 | -0.185357869 | 9.62E-05    |

|              |          |              |             |
|--------------|----------|--------------|-------------|
| RP3-340B19.3 | SDC3     | -0.560531265 | 0           |
| RP3-340B19.3 | CX3CL1   | -0.278520469 | 3.39E-09    |
| RP3-340B19.3 | SDK1     | -0.540283873 | 0           |
| RP3-340B19.3 | DOCK9    | -0.42796702  | 0           |
| RP3-340B19.3 | CSF2     | -0.443159645 | 1.53E-22    |
| RP3-340B19.3 | GRHL3    | -0.46034092  | 0           |
| RP3-340B19.3 | TMEM92   | -0.442359552 | 1.85E-22    |
| RP3-340B19.3 | BASP1    | -0.452661999 | 0           |
| RP3-340B19.3 | HRH1     | -0.481292959 | 0           |
| RP3-340B19.3 | ESM1     | -0.218950434 | 3.85E-06    |
| RP3-340B19.3 | B4GALNT3 | -0.374212591 | 3.86E-16    |
| RP3-340B19.3 | LMO3     | -0.203190626 | 1.86E-05    |
| RP3-340B19.3 | C9orf16  | -0.352240317 | 3.83E-14    |
| RP3-340B19.3 | SEMA3F   | -0.523129807 | 0           |
| RP3-340B19.3 | PLA2G12B | -0.245056886 | 2.00E-07    |
| RP3-340B19.3 | KLK6     | -0.473810186 | 5.98E-26    |
| RP3-340B19.3 | ST3GAL5  | -0.460503465 | 0           |
| RP3-340B19.3 | FAM132B  | -0.140132674 | 0.003282405 |
| RP3-340B19.3 | CDKN1A   | -0.20308666  | 1.88E-05    |
| RP3-340B19.3 | E2F1     | -0.251946431 | 9.72E-08    |
| RP3-340B19.3 | B3GNT8   | -0.453103538 | 0           |
| RP3-340B19.3 | MTMR11   | -0.477269181 | 0           |
| RP3-340B19.3 | MYO1G    | -0.355576752 | 2.07E-14    |
| RP3-340B19.3 | TMSB10   | -0.424916813 | 0           |
| RP3-340B19.3 | UNC5CL   | -0.386737661 | 0           |
| RP3-340B19.3 | ABR      | -0.376849769 | 1.83E-16    |
| RP3-340B19.3 | PLP2     | -0.456850733 | 0           |
| RP3-340B19.3 | SRCIN1   | -0.295816797 | 3.14E-10    |
| RP3-340B19.3 | PDE9A    | -0.368204087 | 1.63E-15    |
| RP3-340B19.3 | TREM2    | -0.23992233  | 3.95E-07    |
| RP3-340B19.3 | KDEL3    | -0.279720552 | 2.89E-09    |
| RP3-340B19.3 | PC       | -0.397656992 | 0           |
| RP3-340B19.3 | C2CD4A   | -0.334422737 | 8.44E-13    |
| RP3-340B19.3 | PELI1    | -0.486444625 | 0           |
| RP3-340B19.3 | SSX1     | -0.401729278 | 0           |
| RP3-340B19.3 | MROH6    | -0.436796665 | 0           |
| RP3-340B19.3 | ESPN     | -0.516876066 | 0           |
| RP3-340B19.3 | BMP1     | -0.473374759 | 0           |
| RP3-340B19.3 | TM4SF4   | -0.40424377  | 1.09E-18    |
| RP3-340B19.3 | CORO2A   | -0.535330637 | 0           |
| RP3-340B19.3 | CD164L2  | -0.292399739 | 4.21E-10    |
| RP3-340B19.3 | CTSS     | -0.215302241 | 5.61E-06    |
| RP3-340B19.3 | CLU      | -0.488705935 | 0           |
| RP3-340B19.3 | TMSB4X   | -0.428236652 | 0           |
| RP3-340B19.3 | WNT10A   | -0.46528162  | 5.75E-25    |
| RP3-340B19.3 | NAPSA    | -0.328617343 | 2.18E-12    |
| RP3-340B19.3 | PLEKHA4  | -0.380204926 | 5.31E-17    |
| RP3-340B19.3 | SFTPA1   | -0.177819874 | 0.00018039  |
| RP3-340B19.3 | C1orf116 | -0.347101984 | 9.65E-14    |
| RP3-340B19.3 | TM4SF1   | -0.344280418 | 1.58E-13    |
| RP3-340B19.3 | SEL1L3   | -0.444570616 | 0           |

|              |          |              |          |
|--------------|----------|--------------|----------|
| RP3-340B19.3 | VASN     | -0.408406403 | 0        |
| RP3-340B19.3 | NPTXR    | -0.409499258 | 0        |
| RP3-340B19.3 | PDE4C    | -0.353947186 | 2.80E-14 |
| RP3-340B19.3 | CDC42EP1 | -0.517125699 | 0        |
| RP3-340B19.3 | ENDOD1   | -0.468531589 | 0        |
| RP3-340B19.3 | RYR1     | -0.442325335 | 0        |
| RP3-340B19.3 | IL1RAP   | -0.486661778 | 0        |
| RP3-340B19.3 | SLC35F2  | -0.468295234 | 2.60E-25 |
| RP3-340B19.3 | ISYNA1   | -0.504693533 | 0        |
| RP3-340B19.3 | HLA-G    | -0.278002621 | 3.64E-09 |
| RP3-340B19.3 | CDKN2B   | -0.44012303  | 0        |
| RP3-340B19.3 | ALDH1A3  | -0.369114681 | 1.33E-15 |
| RP3-340B19.3 | CLIP3    | -0.519418212 | 0        |
| RP3-340B19.3 | ULBP2    | -0.308949356 | 4.63E-11 |
| RP3-340B19.3 | ETHE1    | -0.376677862 | 1.93E-16 |
| RP3-340B19.3 | XPR1     | -0.495398662 | 0        |
| RP3-340B19.3 | SPTBN2   | -0.45202742  | 0        |
| RP3-340B19.3 | IVL      | -0.412900425 | 1.67E-19 |
| RP3-340B19.3 | MARCO    | -0.261118045 | 3.18E-08 |
| RP3-340B19.3 | PLXND1   | -0.505607531 | 0        |
| RP3-340B19.3 | EMILIN2  | -0.397917689 | 0        |
| RP3-340B19.3 | PLAUR    | -0.396477333 | 0        |
| RP3-340B19.3 | CDC42EP5 | -0.512032895 | 0        |
| RP3-340B19.3 | TRPC5    | -0.356809876 | 1.26E-14 |
| RP3-340B19.3 | TMEM100  | -0.398715239 | 0        |
| RP3-340B19.3 | QSOX1    | -0.53000678  | 0        |
| RP3-340B19.3 | ARHGAP23 | -0.579743388 | 0        |
| RP3-340B19.3 | MDF1     | -0.503144955 | 0        |
| RP3-340B19.3 | FSTL3    | -0.468188343 | 0        |
| RP3-340B19.3 | INF2     | -0.477318541 | 0        |
| RP3-340B19.3 | TGFBR1   | -0.466597072 | 0        |
| RP3-340B19.3 | TGFBI    | -0.3733254   | 4.87E-16 |
| RP3-340B19.3 | ERBB3    | -0.422468987 | 0        |
| RP3-340B19.3 | CCL18    | -0.277362652 | 3.96E-09 |
| RP3-340B19.3 | CCL17    | -0.275634093 | 4.28E-09 |
| RP3-340B19.3 | C16orf45 | -0.465210614 | 0        |
| RP3-340B19.3 | PRDM1    | -0.37530956  | 2.87E-16 |
| RP3-340B19.3 | TRIM47   | -0.423065129 | 0        |
| RP3-340B19.3 | CNFN     | -0.261947083 | 2.87E-08 |
| RP3-340B19.3 | ARMCX3   | -0.302961417 | 1.12E-10 |
| RP3-340B19.3 | RAMP1    | -0.389306331 | 0        |
| RP3-340B19.3 | GABRD    | -0.2972268   | 2.57E-10 |
| RP3-340B19.3 | COL13A1  | -0.242610711 | 2.91E-07 |
| RP3-340B19.3 | S100A5   | -0.287019917 | 1.08E-09 |
| RP3-340B19.3 | MISP     | -0.417632767 | 0        |
| RP3-340B19.3 | HES6     | -0.239895948 | 3.96E-07 |
| RP3-340B19.3 | PSD3     | -0.416164611 | 0        |
| RP3-340B19.3 | DOK7     | -0.503584082 | 0        |
| RP3-340B19.3 | ZMAT3    | -0.468060689 | 0        |
| RP3-340B19.3 | MFAP2    | -0.499034515 | 0        |
| RP3-340B19.3 | TMEM79   | -0.459363804 | 0        |

|              |           |              |             |
|--------------|-----------|--------------|-------------|
| RP3-340B19.3 | SLC1A5    | -0.37310612  | 5.14E-16    |
| RP3-340B19.3 | BBC3      | -0.445859632 | 0           |
| RP3-340B19.3 | HLA-DQB2  | -0.256814281 | 5.40E-08    |
| RP3-340B19.3 | C1QL1     | -0.423826085 | 0           |
| RP3-340B19.3 | TMEM215   | -0.218642632 | 3.76E-06    |
| RP3-340B19.3 | PNP       | -0.343249262 | 1.89E-13    |
| RP3-340B19.3 | ARNTL     | -0.416338645 | 0           |
| RP3-340B19.3 | CLDN2     | -0.227968801 | 1.39E-06    |
| RP3-340B19.3 | MVP       | -0.443500313 | 0           |
| RP3-340B19.3 | LGALS1    | -0.423824241 | 0           |
| RP3-340B19.3 | BIRC7     | -0.442185655 | 1.93E-22    |
| RP3-340B19.3 | COL8A1    | -0.365296851 | 3.04E-15    |
| RP3-340B19.3 | PERP      | -0.446028418 | 0           |
| RP3-340B19.3 | GJA4      | -0.359133177 | 1.05E-14    |
| RP3-340B19.3 | IGFL2     | -0.442895712 | 1.63E-22    |
| RP3-340B19.3 | DAPK2     | -0.304013707 | 9.62E-11    |
| RP3-340B19.3 | MAMLD1    | -0.450476431 | 0           |
| RP3-340B19.3 | ETV5      | -0.38990843  | 0           |
| RP3-340B19.3 | RUNX1     | -0.579142566 | 0           |
| RP3-340B19.3 | LONRF2    | -0.281758185 | 2.20E-09    |
| RP3-340B19.3 | SPOCK1    | -0.41599086  | 0           |
| RP3-340B19.3 | XKRX      | -0.408899003 | 0           |
| RP3-340B19.3 | TGFB1     | -0.45586298  | 0           |
| RP3-340B19.3 | ERP27     | -0.171970146 | 0.000300469 |
| RP3-340B19.3 | TNFRSF10C | -0.320265689 | 8.22E-12    |
| RP3-340B19.3 | PALM      | -0.547028228 | 0           |
| RP3-340B19.3 | TSC22D1   | -0.4754053   | 0           |
| RP3-340B19.3 | TGM2      | -0.383189321 | 2.88E-18    |
| RP3-340B19.3 | UBE2QL1   | -0.278458202 | 3.42E-09    |
| RP3-340B19.3 | ECE1      | -0.55467325  | 0           |
| RP3-340B19.3 | COL8A2    | -0.46785616  | 0           |
| RP3-340B19.3 | HIST3H2A  | -0.319005325 | 1.00E-11    |
| RP3-340B19.3 | TNFRSF21  | -0.463949824 | 0           |
| RP3-340B19.3 | SOX4      | -0.608512781 | 0           |
| RP3-340B19.3 | ELF3      | -0.467584684 | 0           |
| RP3-340B19.3 | TPD52L1   | -0.331192255 | 1.44E-12    |
| RP3-340B19.3 | INHBB     | -0.418976106 | 0           |
| RP3-340B19.3 | HPN       | -0.323290508 | 5.11E-12    |
| RP3-340B19.3 | MMP7      | -0.357548857 | 1.10E-14    |
| RP3-340B19.3 | RAB27A    | -0.42861635  | 0           |
| RP3-340B19.3 | IGF2BP2   | -0.524958938 | 0           |
| RP3-340B19.3 | ITGB4     | -0.521233444 | 0           |
| RP3-340B19.3 | PPP1R1B   | -0.52890584  | 0           |
| RP3-340B19.3 | NPDC1     | -0.420154631 | 0           |
| RP3-340B19.3 | CCL13     | -0.355920124 | 1.48E-14    |
| RP3-340B19.3 | SPINT1    | -0.405122874 | 0           |
| RP3-340B19.3 | HEY2      | -0.387398764 | 0           |
| RP3-340B19.3 | CST2      | -0.360223596 | 6.75E-15    |
| RP3-340B19.3 | ADM       | -0.205398038 | 1.50E-05    |
| RP3-340B19.3 | VSTM2L    | -0.314915735 | 1.88E-11    |
| RP3-340B19.3 | FAM84A    | -0.501879626 | 0           |

|              |            |              |            |
|--------------|------------|--------------|------------|
| RP3-340B19.3 | P4HA2      | -0.313418785 | 2.36E-11   |
| RP3-340B19.3 | LPL        | -0.46654133  | 0          |
| RP3-340B19.3 | TMEM173    | -0.453413878 | 0          |
| RP3-340B19.3 | DHRS3      | -0.395209876 | 0          |
| RP3-340B19.3 | SCN1B      | -0.411067835 | 0          |
| RP3-340B19.3 | GLT1D1     | -0.333285487 | 1.02E-12   |
| RP3-340B19.3 | PHYHIP     | -0.45258257  | 0          |
| RP3-340B19.3 | BHLHE40    | -0.406226083 | 0          |
| RP3-340B19.3 | BID        | -0.467706664 | 0          |
| RP3-340B19.3 | POSTN      | -0.279745374 | 2.88E-09   |
| RP3-340B19.3 | ITGA3      | -0.409066797 | 0          |
| RP3-340B19.3 | RSPO4      | -0.360278653 | 8.38E-15   |
| RP3-340B19.3 | ADAMTS9    | -0.335569207 | 6.98E-13   |
| RP3-340B19.3 | ABTB2      | -0.433407609 | 0          |
| RP3-340B19.3 | KCNQ3      | -0.473507377 | 0          |
| RP3-340B19.3 | ANXA1      | -0.418375993 | 0          |
| RP3-340B19.3 | S100A11    | -0.43526525  | 0          |
| RP3-340B19.3 | CEACAM6    | -0.373727964 | 5.33E-16   |
| RP3-340B19.3 | IER5L      | -0.488143834 | 0          |
| RP3-340B19.3 | KRT80      | -0.364769784 | 3.39E-15   |
| RP3-340B19.3 | CDH6       | -0.469512676 | 0          |
| RP3-340B19.3 | UNC5B      | -0.502366836 | 0          |
| RP3-340B19.3 | PLEKHN1    | -0.492186192 | 0          |
| RP3-340B19.3 | SYTL1      | -0.377636965 | 1.42E-16   |
| RP3-340B19.3 | TMEM163    | -0.370079883 | 1.07E-15   |
| RP3-340B19.3 | C4orf48    | -0.360180786 | 8.55E-15   |
| RP3-340B19.3 | B3GNT7     | -0.388856849 | 0          |
| RP3-340B19.3 | BAIAP3     | -0.562593861 | 0          |
| RP3-340B19.3 | PHLDA2     | -0.345634253 | 1.25E-13   |
| RP3-340B19.3 | GAP43      | -0.469820195 | 1.74E-25   |
| RP3-340B19.3 | S100A1     | -0.168577544 | 0.00039593 |
| RP3-340B19.3 | PTPRE      | -0.467793468 | 0          |
| RP3-340B19.3 | CCND1      | -0.460260073 | 0          |
| RP3-340B19.3 | ST6GALNAC5 | -0.410239372 | 3.00E-19   |
| RP3-340B19.3 | KRT17      | -0.39228562  | 0          |
| RP3-340B19.3 | HPCAL4     | -0.414827937 | 0          |
| RP3-340B19.3 | GABBR2     | -0.273026407 | 7.00E-09   |
| RP3-340B19.3 | DIRAS3     | -0.374748452 | 3.35E-16   |
| RP3-340B19.3 | SERINC2    | -0.326494183 | 3.07E-12   |
| RP3-340B19.3 | PTCHD4     | -0.408085993 | 0          |
| RP3-340B19.3 | EPS8       | -0.445830556 | 0          |
| RP3-340B19.3 | LY6E       | -0.463940746 | 0          |
| RP3-340B19.3 | UPP1       | -0.422415089 | 0          |
| RP3-340B19.3 | AHNAK2     | -0.42584074  | 0          |
| RP3-340B19.3 | PLXNC1     | -0.396345424 | 0          |
| RP3-340B19.3 | TNC        | -0.390919161 | 0          |
| RP3-340B19.3 | DUSP4      | -0.507718493 | 0          |
| RP3-340B19.3 | NRCAM      | -0.469525725 | 0          |
| RP3-340B19.3 | NRP2       | -0.444400696 | 0          |
| RP3-340B19.3 | CTSC       | -0.40081528  | 0          |
| RP3-340B19.3 | AMIGO2     | -0.518957951 | 0          |

|              |         |              |          |
|--------------|---------|--------------|----------|
| RP3-340B19.3 | NAB2    | -0.362534005 | 5.35E-15 |
| RP3-340B19.3 | TBC1D2  | -0.4357231   | 0        |
| RP3-340B19.3 | PHLDA3  | -0.393520029 | 0        |
| RP3-340B19.3 | PTP4A3  | -0.378692091 | 9.87E-17 |
| RP3-340B19.3 | CRABP2  | -0.261898008 | 2.89E-08 |
| RP3-340B19.3 | GOS2    | -0.364245838 | 3.78E-15 |
| RP3-340B19.3 | S100A6  | -0.385903659 | 0        |
| RP3-340B19.3 | FOXQ1   | -0.32112196  | 7.19E-12 |
| RP3-340B19.3 | LRG1    | -0.387378197 | 0        |
| RP3-340B19.3 | LAMP5   | -0.399762281 | 0        |
| RP3-340B19.3 | ALDH3B1 | -0.463252127 | 0        |
| RP3-340B19.3 | CDH2    | -0.351262209 | 4.58E-14 |
| RP3-340B19.3 | SCG5    | -0.286932971 | 1.09E-09 |
| RP3-340B19.3 | ZCCHC16 | -0.344414106 | 1.14E-13 |
| RP3-340B19.3 | GRB7    | -0.579139588 | 0        |
| RP3-340B19.3 | TIAM1   | -0.466509984 | 0        |
| RP3-340B19.3 | FXYD5   | -0.395811691 | 0        |
| RP3-340B19.3 | CLDN9   | -0.397911165 | 0        |
| RP3-340B19.3 | FAM43A  | -0.442771838 | 0        |
| RP3-340B19.3 | CHST2   | -0.528741734 | 0        |
| RP3-340B19.3 | HMGA2   | -0.537995331 | 0        |
| RP3-340B19.3 | GALNT7  | -0.428684574 | 0        |
| RP3-340B19.3 | CBLN1   | -0.234956754 | 6.90E-07 |
| RP3-340B19.3 | STRA6   | -0.512001123 | 0        |
| RP3-340B19.3 | MUC21   | -0.351824211 | 3.09E-14 |
| RP3-340B19.3 | PRR36   | -0.526545245 | 0        |
| RP3-340B19.3 | NFE2L3  | -0.430137979 | 0        |
| RP3-340B19.3 | NR1D1   | -0.295286468 | 3.39E-10 |
| RP3-340B19.3 | MUC1    | -0.310115824 | 3.89E-11 |
| RP3-340B19.3 | NAT8L   | -0.468187066 | 0        |
| RP3-340B19.3 | APOC1   | -0.428511533 | 0        |
| RP3-340B19.3 | EVA1A   | -0.487958028 | 0        |
| RP3-340B19.3 | ENTPD1  | -0.39552745  | 0        |
| RP3-340B19.3 | COL1A1  | -0.380250314 | 5.20E-17 |
| RP3-340B19.3 | FNDC4   | -0.340911786 | 2.83E-13 |
| RP3-340B19.3 | FRMD3   | -0.207879762 | 1.18E-05 |
| RP3-340B19.3 | SHROOM4 | -0.482077035 | 0        |
| RP3-340B19.3 | NELL2   | -0.483251162 | 0        |
| RP3-340B19.3 | EPHB3   | -0.518872139 | 0        |
| RP3-340B19.3 | TMC6    | -0.526182851 | 0        |
| RP3-340B19.3 | NOD1    | -0.499737318 | 0        |
| RP3-340B19.3 | GGCT    | -0.443402446 | 0        |
| RP3-340B19.3 | ICAM1   | -0.403277998 | 0        |
| RP3-340B19.3 | PRSS23  | -0.418956533 | 0        |
| RP3-340B19.3 | CFI     | -0.410315956 | 0        |
| RP3-340B19.3 | CD55    | -0.447236162 | 0        |
| RP3-340B19.3 | RASD2   | -0.520758573 | 0        |
| RP3-340B19.3 | KLK11   | -0.412849065 | 1.69E-19 |
| RP3-340B19.3 | ICAM5   | -0.461731065 | 0        |
| RP3-340B19.3 | ADORA1  | -0.280033729 | 2.77E-09 |
| RP3-340B19.3 | ITGA2   | -0.473247248 | 0        |

|              |           |              |             |
|--------------|-----------|--------------|-------------|
| RP3-340B19.3 | ABCC3     | -0.422726989 | 0           |
| RP3-340B19.3 | MFGES     | -0.380626324 | 4.33E-17    |
| RP3-340B19.3 | STK32A    | -0.302620867 | 1.18E-10    |
| RP3-340B19.3 | CYSLTR2   | -0.490928664 | 0           |
| RP3-340B19.3 | LAD1      | -0.447811453 | 0           |
| RP3-340B19.3 | MGAT3     | -0.480724192 | 0           |
| RP3-340B19.3 | IGFBP6    | -0.392465895 | 0           |
| RP3-340B19.3 | CYP2S1    | -0.469805428 | 0           |
| RP3-340B19.3 | KCNJ2     | -0.423257318 | 0           |
| RP3-340B19.3 | FAM20A    | -0.428692659 | 0           |
| RP3-340B19.3 | TGFA      | -0.389104213 | 0           |
| RP3-340B19.3 | MXRA8     | -0.522104608 | 0           |
| RP3-340B19.3 | C8orf4    | -0.41672274  | 0           |
| RP3-340B19.3 | CLDN10    | -0.498820743 | 5.37E-29    |
| RP3-340B19.3 | PDE5A     | -0.45365415  | 0           |
| RP3-340B19.3 | APOE      | -0.448622194 | 0           |
| RP3-340B19.3 | SPOCK2    | -0.483158401 | 0           |
| RP3-340B19.3 | TENM1     | -0.308523135 | 4.94E-11    |
| RP3-340B19.3 | SLIT1     | -0.270745099 | 9.40E-09    |
| RP3-340B19.3 | CXCL14    | -0.384920585 | 0           |
| RP3-340B19.3 | ECM1      | -0.213711963 | 6.59E-06    |
| RP3-340B19.3 | DUSP5     | -0.444523243 | 0           |
| RP3-340B19.3 | SEZ6L2    | -0.36507984  | 3.18E-15    |
| RP3-340B19.3 | THRSP     | -0.082180292 | 0.085455358 |
| RP3-340B19.3 | C19orf33  | -0.415969868 | 0           |
| RP3-340B19.3 | MPZL2     | -0.466373253 | 0           |
| RP3-340B19.3 | CTSH      | -0.408045569 | 0           |
| RP3-340B19.3 | CYP1B1    | -0.405833619 | 0           |
| RP3-340B19.3 | ALOX5     | -0.286709152 | 1.12E-09    |
| RP3-340B19.3 | SYTL5     | -0.515446153 | 3.65E-31    |
| RP3-340B19.3 | TNFRSF12A | -0.393343867 | 0           |
| RP3-340B19.3 | DUSP6     | -0.441173617 | 0           |
| RP3-340B19.3 | ALOX15B   | -0.290830655 | 6.34E-10    |
| RP3-340B19.3 | SDC4      | -0.493892777 | 0           |
| RP3-340B19.3 | MDK       | -0.486460795 | 0           |
| RP3-340B19.3 | KRT19     | -0.453773577 | 0           |
| RP3-340B19.3 | MET       | -0.467062865 | 0           |
| RP3-340B19.3 | TESC      | -0.38605202  | 0           |
| RP3-340B19.3 | CXCL17    | -0.284715641 | 1.24E-09    |
| RP3-340B19.3 | NPC2      | -0.343427693 | 1.84E-13    |
| RP3-340B19.3 | COMP      | -0.436128329 | 0           |
| RP3-340B19.3 | TUSC3     | -0.52937986  | 0           |
| RP3-340B19.3 | TMPRSS4   | -0.480065926 | 0           |
| RP3-340B19.3 | LGALS3    | -0.410721894 | 0           |
| RP3-340B19.3 | CRLF1     | -0.44880176  | 0           |
| RP3-340B19.3 | CTXN1     | -0.533350165 | 0           |
| RP3-340B19.3 | PCSK1N    | -0.44742055  | 0           |
| RP3-340B19.3 | NMU       | -0.340281794 | 2.31E-13    |
| RP3-340B19.3 | GALE      | -0.481074104 | 0           |
| RP3-340B19.3 | PCSK2     | -0.154062074 | 0.001217371 |
| RP3-340B19.3 | GJB3      | -0.49057166  | 0           |

|              |          |              |          |
|--------------|----------|--------------|----------|
| RP3-340B19.3 | SLPI     | -0.366813657 | 2.20E-15 |
| RP3-340B19.3 | AGR2     | -0.382587506 | 9.87E-18 |
| RP3-340B19.3 | MRC2     | -0.492123642 | 0        |
| RP3-340B19.3 | GOLT1A   | -0.365082251 | 3.18E-15 |
| RP3-340B19.3 | SLC27A6  | -0.457209243 | 4.62E-24 |
| RP3-340B19.3 | KCNN4    | -0.494243824 | 0        |
| RP3-340B19.3 | ETV4     | -0.501920705 | 2.16E-29 |
| RP3-340B19.3 | SYT12    | -0.503271899 | 0        |
| RP3-340B19.3 | PVRL4    | -0.462290471 | 0        |
| RP3-340B19.3 | PLCD3    | -0.468507902 | 0        |
| RP3-340B19.3 | PLAU     | -0.362223098 | 5.70E-15 |
| RP3-340B19.3 | LRRK2    | -0.345984023 | 1.18E-13 |
| RP3-340B19.3 | SFN      | -0.365996817 | 2.62E-15 |
| RP3-340B19.3 | LPAR5    | -0.41202637  | 0        |
| RP3-340B19.3 | NGEF     | -0.469771529 | 0        |
| RP3-340B19.3 | DTX4     | -0.395550002 | 0        |
| RP3-340B19.3 | CST6     | -0.371963338 | 6.83E-16 |
| RP3-340B19.3 | QPCT     | -0.447129926 | 0        |
| RP3-340B19.3 | TIMP1    | -0.451053424 | 0        |
| RP3-340B19.3 | CAMK2N1  | -0.563181634 | 0        |
| RP3-340B19.3 | KLHDC8A  | -0.263478641 | 2.37E-08 |
| RP3-340B19.3 | PDLIM4   | -0.451997209 | 0        |
| RP3-340B19.3 | SCEL     | -0.384260617 | 0        |
| RP3-340B19.3 | LCN2     | -0.358810355 | 1.12E-14 |
| RP3-340B19.3 | PROS1    | -0.370836442 | 8.94E-16 |
| RP3-340B19.3 | GABRB2   | -0.426756156 | 0        |
| RP3-340B19.3 | TMPRSS6  | -0.437662155 | 0        |
| RP3-340B19.3 | KLK7     | -0.328938123 | 1.55E-12 |
| RP3-340B19.3 | PDZK1IP1 | -0.330520514 | 1.60E-12 |
| RP3-340B19.3 | CDH3     | -0.554808562 | 0        |
| RP3-340B19.3 | LRP4     | -0.47604924  | 0        |
| RP3-340B19.3 | IGSF1    | -0.321398117 | 6.89E-12 |
| RP3-340B19.3 | B3GNT3   | -0.40776147  | 0        |
| RP3-340B19.3 | CLDN1    | -0.462096154 | 0        |
| RP3-340B19.3 | GDF15    | -0.366167305 | 2.53E-15 |
| RP3-340B19.3 | ARHGAP36 | -0.253669129 | 7.12E-08 |
| RP3-340B19.3 | LAMB3    | -0.507458789 | 0        |
| RP3-340B19.3 | KLK10    | -0.394235455 | 0        |
| RP3-340B19.3 | DPP4     | -0.343496058 | 1.81E-13 |
| RP3-340B19.3 | METTL7B  | -0.359445076 | 9.87E-15 |
| RP3-340B19.3 | LIPH     | -0.431350545 | 0        |
| RP3-340B19.3 | CLDN16   | -0.436253996 | 0        |
| RP3-340B19.3 | CHI3L1   | -0.265778955 | 1.77E-08 |
| RP3-340B19.3 | SLC22A31 | -0.449402032 | 3.29E-23 |
| RP3-340B19.3 | TACSTD2  | -0.457143627 | 0        |
| RP3-340B19.3 | SFTPB    | -0.322343603 | 5.94E-12 |
| RP3-340B19.3 | RXRG     | -0.374859085 | 3.25E-16 |
| RP3-340B19.3 | DCSTAMP  | -0.365320778 | 2.63E-15 |
| RP3-340B19.3 | CITED1   | -0.211633482 | 8.12E-06 |
| RP3-340B19.3 | SERPINA1 | -0.436563627 | 0        |
| RP3-340B19.3 | PRR15    | -0.453222965 | 0        |



|              |           |              |          |
|--------------|-----------|--------------|----------|
| RP3-340B19.3 | SLC34A2   | -0.35082379  | 4.96E-14 |
| RP3-340B19.3 | FN1       | -0.441711322 | 0        |
| RP3-340B19.3 | ZCCHC12   | -0.31541798  | 1.74E-11 |
| MIR22HG      | TFF3      | 0.651547585  | 0        |
| MIR22HG      | CCL21     | 0.476249116  | 3.09E-26 |
| MIR22HG      | TPO       | 0.663591543  | 0        |
| MIR22HG      | MT1G      | 0.583434841  | 0        |
| MIR22HG      | DI01      | 0.613273119  | 0        |
| MIR22HG      | DPT       | 0.417670714  | 5.82E-20 |
| MIR22HG      | CDH16     | 0.588635725  | 0        |
| MIR22HG      | CRABP1    | 0.463686619  | 8.71E-25 |
| MIR22HG      | SLC26A7   | 0.587448407  | 0        |
| MIR22HG      | MT1H      | 0.526033855  | 1.31E-32 |
| MIR22HG      | SLC26A4   | 0.582840969  | 0        |
| MIR22HG      | SLC5A8    | 0.578839979  | 1.25E-40 |
| MIR22HG      | PKHD1L1   | 0.638387382  | 1.26E-51 |
| MIR22HG      | TFCP2L1   | 0.60265051   | 0        |
| MIR22HG      | WSCD2     | 0.67215009   | 5.17E-59 |
| MIR22HG      | IPCEF1    | 0.622353674  | 0        |
| MIR22HG      | SLC5A5    | 0.568508761  | 6.02E-39 |
| MIR22HG      | MT1F      | 0.600322396  | 0        |
| MIR22HG      | FOSB      | 0.673442841  | 0        |
| MIR22HG      | SEMA3D    | 0.675922958  | 6.71E-60 |
| MIR22HG      | BMP8A     | 0.602874897  | 0        |
| MIR22HG      | MATN2     | 0.55774686   | 0        |
| MIR22HG      | PLA2R1    | 0.628872083  | 0        |
| MIR22HG      | COL23A1   | 0.498539219  | 0        |
| MIR22HG      | HGD       | 0.65805337   | 0        |
| MIR22HG      | TCEAL2    | 0.466364459  | 0        |
| MIR22HG      | CHRD1     | 0.518678408  | 1.34E-31 |
| MIR22HG      | TNFRSF11B | 0.585020297  | 0        |
| MIR22HG      | FAM167A   | 0.65318708   | 0        |
| MIR22HG      | KIT       | 0.529227668  | 0        |
| MIR22HG      | SLC4A4    | 0.579563539  | 0        |
| MIR22HG      | SMOC2     | 0.504298091  | 0        |
| MIR22HG      | FHL1      | 0.742636525  | 0        |
| MIR22HG      | OTOS      | 0.503665922  | 0        |
| MIR22HG      | IGFBPL1   | 0.533185     | 1.30E-33 |
| MIR22HG      | HBB       | 0.448413977  | 0        |
| MIR22HG      | BEX1      | 0.443650093  | 0        |
| MIR22HG      | FABP4     | 0.551072367  | 3.10E-36 |
| MIR22HG      | LMOD1     | 0.673562268  | 0        |
| MIR22HG      | SOD3      | 0.579522548  | 0        |
| MIR22HG      | TMEM171   | 0.530945883  | 0        |
| MIR22HG      | PI16      | 0.492868996  | 0        |
| MIR22HG      | ZMAT4     | 0.637833067  | 1.64E-51 |
| MIR22HG      | MFAP4     | 0.369089008  | 1.34E-15 |
| MIR22HG      | CWH43     | 0.50236267   | 1.90E-29 |
| MIR22HG      | SPX       | 0.578440189  | 0        |
| MIR22HG      | APOD      | 0.318049768  | 1.16E-11 |
| MIR22HG      | DPP6      | 0.564793613  | 0        |

|         |            |             |          |
|---------|------------|-------------|----------|
| MIR22HG | MMRN1      | 0.472287719 | 0        |
| MIR22HG | WDR72      | 0.405231663 | 0        |
| MIR22HG | MPPED2     | 0.677493426 | 0        |
| MIR22HG | PAPSS2     | 0.562323377 | 0        |
| MIR22HG | DCN        | 0.260870823 | 3.28E-08 |
| MIR22HG | SORBS2     | 0.659871155 | 0        |
| MIR22HG | EGR2       | 0.574519952 | 0        |
| MIR22HG | EDN3       | 0.493438845 | 2.55E-28 |
| MIR22HG | DIO2       | 0.444862517 | 0        |
| MIR22HG | ITPR1      | 0.725990236 | 0        |
| MIR22HG | CFD        | 0.338471336 | 4.29E-13 |
| MIR22HG | CPXM1      | 0.512746761 | 0        |
| MIR22HG | ELMO1      | 0.687728251 | 0        |
| MIR22HG | GPC3       | 0.561114803 | 8.90E-38 |
| MIR22HG | MYOC       | 0.359816106 | 7.28E-15 |
| MIR22HG | DEPTOR     | 0.589463629 | 0        |
| MIR22HG | DGKI       | 0.671800509 | 0        |
| MIR22HG | CARTPT     | 0.601823435 | 1.33E-44 |
| MIR22HG | IYD        | 0.355980279 | 1.91E-14 |
| MIR22HG | LYVE1      | 0.536078686 | 0        |
| MIR22HG | CLCNKB     | 0.556678259 | 0        |
| MIR22HG | NCAM1      | 0.40613942  | 0        |
| MIR22HG | HBA2       | 0.428625854 | 0        |
| MIR22HG | GLT8D2     | 0.567779568 | 0        |
| MIR22HG | OGDHL      | 0.358378603 | 1.21E-14 |
| MIR22HG | LIFR       | 0.54538235  | 0        |
| MIR22HG | CSGALNACT1 | 0.47281507  | 0        |
| MIR22HG | RAP1GAP    | 0.418390177 | 0        |
| MIR22HG | COL9A3     | 0.54795017  | 0        |
| MIR22HG | FBLN1      | 0.280605474 | 2.57E-09 |
| MIR22HG | EFEMP1     | 0.621251316 | 0        |
| MIR22HG | AOX1       | 0.579308749 | 1.04E-40 |
| MIR22HG | GRIN2C     | 0.590895191 | 0        |
| MIR22HG | C11orf74   | 0.511184709 | 0        |
| MIR22HG | PPARGC1A   | 0.535009092 | 0        |
| MIR22HG | ANGPTL1    | 0.566101351 | 0        |
| MIR22HG | SCARA5     | 0.400718473 | 2.31E-18 |
| MIR22HG | LTF        | 0.554314118 | 0        |
| MIR22HG | CA4        | 0.624006439 | 9.44E-49 |
| MIR22HG | TG         | 0.555662847 | 0        |
| MIR22HG | FCGBP      | 0.592617377 | 0        |
| MIR22HG | PBX4       | 0.631960586 | 0        |
| MIR22HG | CYR61      | 0.648210725 | 0        |
| MIR22HG | FOS        | 0.621611866 | 0        |
| MIR22HG | KHDRBS2    | 0.590183594 | 0        |
| MIR22HG | MUM1L1     | 0.485953869 | 0        |
| MIR22HG | RGS16      | 0.572970523 | 0        |
| MIR22HG | MT1M       | 0.59246703  | 0        |
| MIR22HG | LRP2       | 0.624014019 | 0        |
| MIR22HG | MAFB       | 0.630536683 | 0        |
| MIR22HG | KCNK2      | 0.544775429 | 0        |

|         |          |             |          |
|---------|----------|-------------|----------|
| MIR22HG | TBC1D4   | 0.564772905 | 0        |
| MIR22HG | MIOX     | 0.593510972 | 3.96E-43 |
| MIR22HG | TPPP     | 0.598869274 | 0        |
| MIR22HG | FMOD     | 0.496369537 | 0        |
| MIR22HG | CITED2   | 0.580972691 | 0        |
| MIR22HG | RGS8     | 0.613211757 | 1.09E-46 |
| MIR22HG | ABI3BP   | 0.270916864 | 9.20E-09 |
| MIR22HG | ADH1B    | 0.492679062 | 3.18E-28 |
| MIR22HG | OGN      | 0.355542081 | 1.58E-14 |
| MIR22HG | NR4A1    | 0.697066241 | 0        |
| MIR22HG | FOXJ1    | 0.642283013 | 1.98E-52 |
| MIR22HG | ALDH1A1  | 0.503733579 | 0        |
| MIR22HG | OCA2     | 0.553589774 | 1.29E-36 |
| MIR22HG | TMEM139  | 0.408495051 | 0        |
| MIR22HG | ARHGAP24 | 0.594613168 | 0        |
| MIR22HG | SLC25A15 | 0.555752772 | 0        |
| MIR22HG | DES      | 0.389102171 | 2.56E-17 |
| MIR22HG | GDF10    | 0.515149529 | 4.00E-31 |
| MIR22HG | KIAA1324 | 0.546584704 | 0        |
| MIR22HG | JUN      | 0.605845817 | 0        |
| MIR22HG | C7       | 0.236388458 | 5.89E-07 |
| MIR22HG | LGI3     | 0.572832232 | 0        |
| MIR22HG | CDON     | 0.630820783 | 0        |
| MIR22HG | BCL2     | 0.49581467  | 0        |
| MIR22HG | HLF      | 0.599203868 | 0        |
| MIR22HG | EGR1     | 0.589223073 | 0        |
| MIR22HG | IP6K3    | 0.423435466 | 0        |
| MIR22HG | SCUBE3   | 0.515234868 | 0        |
| MIR22HG | PKNOX2   | 0.577168335 | 0        |
| MIR22HG | SMAD9    | 0.439026203 | 0        |
| MIR22HG | IQGAP2   | 0.603882082 | 0        |
| MIR22HG | GNA14    | 0.687004598 | 0        |
| MIR22HG | LAYN     | 0.599069265 | 0        |
| MIR22HG | AVPR1A   | 0.629825228 | 0        |
| MIR22HG | PDLIM3   | 0.560302766 | 0        |
| MIR22HG | GPM6A    | 0.470038183 | 0        |
| MIR22HG | SDPR     | 0.567970055 | 0        |
| MIR22HG | CRYAB    | 0.246363863 | 1.88E-07 |
| MIR22HG | FOXA2    | 0.689395639 | 3.54E-63 |
| MIR22HG | C8orf88  | 0.536067197 | 0        |
| MIR22HG | ISM1     | 0.612603931 | 0        |
| MIR22HG | BMP2     | 0.618804058 | 0        |
| MIR22HG | ID4      | 0.602214078 | 0        |
| MIR22HG | NUPR1    | 0.213674376 | 6.61E-06 |
| MIR22HG | SERTM1   | 0.452340743 | 1.58E-23 |
| MIR22HG | IRS1     | 0.497906909 | 0        |
| MIR22HG | FIBIN    | 0.322749399 | 5.57E-12 |
| MIR22HG | PODN     | 0.339923748 | 3.35E-13 |
| MIR22HG | TDRD9    | 0.466819756 | 0        |
| MIR22HG | EPHA3    | 0.452651078 | 0        |
| MIR22HG | AIF1L    | 0.476821685 | 0        |

|         |          |             |          |
|---------|----------|-------------|----------|
| MIR22HG | EBF4     | 0.617977856 | 0        |
| MIR22HG | ADM2     | 0.51894859  | 0        |
| MIR22HG | GSTM3    | 0.538478712 | 0        |
| MIR22HG | HSD17B6  | 0.395563335 | 0        |
| MIR22HG | AGR3     | 0.56854039  | 5.95E-39 |
| MIR22HG | EPHB1    | 0.361830068 | 6.17E-15 |
| MIR22HG | TMOD1    | 0.472558345 | 0        |
| MIR22HG | WASF3    | 0.577209326 | 0        |
| MIR22HG | SELV     | 0.5694957   | 4.18E-39 |
| MIR22HG | ENPP1    | 0.224106781 | 2.24E-06 |
| MIR22HG | SYNE1    | 0.706152991 | 1.63E-67 |
| MIR22HG | PLCH1    | 0.608321443 | 0        |
| MIR22HG | CCDC146  | 0.648850552 | 0        |
| MIR22HG | SLC16A2  | 0.644037309 | 0        |
| MIR22HG | IER2     | 0.624930571 | 0        |
| MIR22HG | KCNAB1   | 0.590100619 | 0        |
| MIR22HG | SYNDIG1  | 0.531563442 | 0        |
| MIR22HG | C16orf89 | 0.503095312 | 0        |
| MIR22HG | CTGF     | 0.624775685 | 0        |
| MIR22HG | NR4A3    | 0.579804236 | 0        |
| MIR22HG | KIAA1456 | 0.462978098 | 0        |
| MIR22HG | AQP4     | 0.476515459 | 0        |
| MIR22HG | RNF150   | 0.607211851 | 0        |
| MIR22HG | C1S      | 0.198137962 | 3.01E-05 |
| MIR22HG | PFKFB2   | 0.382816432 | 7.06E-18 |
| MIR22HG | PROX1    | 0.573023712 | 0        |
| MIR22HG | TCF7L1   | 0.678875061 | 0        |
| MIR22HG | HSPB6    | 0.468630875 | 0        |
| MIR22HG | FHDC1    | 0.324462934 | 4.25E-12 |
| MIR22HG | PRR15L   | 0.285524386 | 1.32E-09 |
| MIR22HG | SLC1A1   | 0.370012368 | 1.08E-15 |
| MIR22HG | BTBD11   | 0.553347356 | 0        |
| MIR22HG | TRIM58   | 0.454395107 | 0        |
| MIR22HG | LRIG1    | 0.460762743 | 0        |
| MIR22HG | ROR2     | 0.459739388 | 0        |
| MIR22HG | GPR125   | 0.54520009  | 0        |
| MIR22HG | FLRT1    | 0.657483327 | 0        |
| MIR22HG | PGF      | 0.678547134 | 0        |
| MIR22HG | DUSP1    | 0.604636656 | 0        |
| MIR22HG | PLA2G7   | 0.47523935  | 0        |
| MIR22HG | PLSCR4   | 0.366944857 | 2.14E-15 |
| MIR22HG | FAM46B   | 0.506422102 | 0        |
| MIR22HG | GLDC     | 0.593927243 | 0        |
| MIR22HG | ZBTB16   | 0.48277615  | 0        |
| MIR22HG | OMD      | 0.276190282 | 3.98E-09 |
| MIR22HG | HSD11B2  | 0.512672297 | 0        |
| MIR22HG | FGL2     | 0.306831727 | 6.35E-11 |
| MIR22HG | CLCNKA   | 0.59358955  | 3.84E-43 |
| MIR22HG | GATM     | 0.277222517 | 4.03E-09 |
| MIR22HG | TNS3     | 0.512038427 | 0        |
| MIR22HG | TOB1     | 0.641985777 | 0        |

|         |          |             |             |
|---------|----------|-------------|-------------|
| MIR22HG | MARC2    | 0.541980529 | 0           |
| MIR22HG | LRRC2    | 0.440531095 | 0           |
| MIR22HG | SORD     | 0.309149772 | 4.50E-11    |
| MIR22HG | RIMS4    | 0.495184913 | 0           |
| MIR22HG | SLC29A4  | 0.629471203 | 0           |
| MIR22HG | SLC39A14 | 0.545053856 | 0           |
| MIR22HG | FAXDC2   | 0.386901625 | 0           |
| MIR22HG | HSPB8    | 0.507488291 | 0           |
| MIR22HG | CCL19    | 0.114192265 | 0.016683634 |
| MIR22HG | KCNIP3   | 0.596287271 | 0           |
| MIR22HG | CGNL1    | 0.523944803 | 0           |
| MIR22HG | ATF3     | 0.537343447 | 0           |
| MIR22HG | SGCD     | 0.428573799 | 0           |
| MIR22HG | STARD13  | 0.627107487 | 0           |
| MIR22HG | LDHD     | 0.404559922 | 0           |
| MIR22HG | RCAN1    | 0.68042605  | 0           |
| MIR22HG | ID3      | 0.526209942 | 0           |
| MIR22HG | SYTL3    | 0.49212194  | 0           |
| MIR22HG | MT1E     | 0.435063699 | 0           |
| MIR22HG | CAMK1D   | 0.500555576 | 0           |
| MIR22HG | PRKCQ    | 0.394496152 | 0           |
| MIR22HG | NUAK2    | 0.399754622 | 0           |
| MIR22HG | LIPG     | 0.531654502 | 0           |
| MIR22HG | SLC25A25 | 0.611712059 | 0           |
| MIR22HG | PRKX     | 0.34838717  | 7.68E-14    |
| MIR22HG | SRPX     | 0.437220474 | 0           |
| MIR22HG | FAM189A1 | 0.526289796 | 0           |
| MIR22HG | PLEKHH1  | 0.51683933  | 0           |
| MIR22HG | WNT11    | 0.589484479 | 0           |
| MIR22HG | SNAI1    | 0.629339578 | 0           |
| MIR22HG | FDCSP    | 0.123848164 | 0.009390072 |
| MIR22HG | MT1X     | 0.342291152 | 2.23E-13    |
| MIR22HG | ACACB    | 0.617423982 | 0           |
| MIR22HG | ARC      | 0.447811453 | 0           |
| MIR22HG | KLK4     | 0.179802093 | 0.000152206 |
| MIR22HG | ZFPM2    | 0.498152004 | 0           |
| MIR22HG | AKAP12   | 0.459191755 | 0           |
| MIR22HG | GJB6     | 0.512939591 | 7.88E-31    |
| MIR22HG | ERO1LB   | 0.631948388 | 0           |
| MIR22HG | DNALI1   | 0.637071262 | 0           |
| MIR22HG | HKDC1    | 0.4363191   | 0           |
| MIR22HG | ZFP36L2  | 0.465429327 | 0           |
| MIR22HG | CAPSL    | 0.585247679 | 1.05E-41    |
| MIR22HG | CYP7B1   | 0.575125029 | 0           |
| MIR22HG | CPQ      | 0.633409169 | 0           |
| MIR22HG | RPS6KA6  | 0.539386063 | 1.67E-34    |
| MIR22HG | TLE1     | 0.567299024 | 0           |
| MIR22HG | TP53INP2 | 0.784987107 | 0           |
| MIR22HG | KATNAL2  | 0.63657086  | 0           |
| MIR22HG | SGPP2    | 0.285158446 | 1.39E-09    |
| MIR22HG | CTH      | 0.427821779 | 0           |

|         |          |             |          |
|---------|----------|-------------|----------|
| MIR22HG | KIF12    | 0.383024081 | 4.67E-18 |
| MIR22HG | TMEM220  | 0.492508163 | 0        |
| MIR22HG | CENPJ    | 0.606931155 | 0        |
| MIR22HG | FAM155B  | 0.421701932 | 0        |
| MIR22HG | WFS1     | 0.594573311 | 0        |
| MIR22HG | SELENBP1 | 0.429725091 | 0        |
| MIR22HG | SNTA1    | 0.368572296 | 1.50E-15 |
| MIR22HG | FRAS1    | 0.292473554 | 5.04E-10 |
| MIR22HG | FBLN7    | 0.480841491 | 0        |
| MIR22HG | AGPAT9   | 0.507935362 | 0        |
| MIR22HG | GPR83    | 0.387713359 | 0        |
| MIR22HG | PRTG     | 0.443495349 | 0        |
| MIR22HG | EGR3     | 0.524902912 | 0        |
| MIR22HG | GRAMD2   | 0.48725026  | 0        |
| MIR22HG | HYOU1    | 0.641489488 | 0        |
| MIR22HG | FBLN5    | 0.537464434 | 0        |
| MIR22HG | ITM2A    | 0.640805266 | 0        |
| MIR22HG | SRF      | 0.67908881  | 0        |
| MIR22HG | FGFR2    | 0.357123061 | 1.54E-14 |
| MIR22HG | MT1A     | 0.492812421 | 3.06E-28 |
| MIR22HG | MAMDC2   | 0.492757087 | 0        |
| MIR22HG | FHL2     | 0.495554824 | 0        |
| MIR22HG | FTCDNL1  | 0.328763861 | 2.13E-12 |
| MIR22HG | PKIA     | 0.397771029 | 0        |
| MIR22HG | DNAJB4   | 0.596420456 | 0        |
| MIR22HG | SLC25A33 | 0.668871998 | 0        |
| MIR22HG | EYA2     | 0.2800516   | 2.77E-09 |
| MIR22HG | LPAR1    | 0.38569842  | 0        |
| MIR22HG | STX11    | 0.338396446 | 4.34E-13 |
| MIR22HG | ARHGEF28 | 0.390318056 | 0        |
| MIR22HG | OR2W3    | 0.455101456 | 0        |
| MIR22HG | ALDH1B1  | 0.359533383 | 7.66E-15 |
| MIR22HG | CXCL12   | 0.340836754 | 2.87E-13 |
| MIR22HG | OLFM2    | 0.53881671  | 0        |
| MIR22HG | TUB      | 0.361251514 | 6.92E-15 |
| MIR22HG | HTRA3    | 0.425431398 | 0        |
| MIR22HG | CKB      | 0.405255208 | 0        |
| MIR22HG | RGS2     | 0.376157746 | 2.25E-16 |
| MIR22HG | SHANK2   | 0.617002584 | 0        |
| MIR22HG | CNTFR    | 0.53885672  | 1.99E-34 |
| MIR22HG | CYTH3    | 0.5112813   | 0        |
| MIR22HG | PLAC9    | 0.489448594 | 0        |
| MIR22HG | WVOX     | 0.529021863 | 0        |
| MIR22HG | NPR3     | 0.623571062 | 0        |
| MIR22HG | SDC2     | 0.538806355 | 0        |
| MIR22HG | KLF15    | 0.411935311 | 0        |
| MIR22HG | TMEM164  | 0.592553125 | 0        |
| MIR22HG | LONRF3   | 0.350675287 | 5.09E-14 |
| MIR22HG | GBP1     | 0.328002337 | 2.41E-12 |
| MIR22HG | ARHGAP6  | 0.474464778 | 0        |
| MIR22HG | TMEM119  | 0.311074643 | 3.37E-11 |

|         |          |             |             |
|---------|----------|-------------|-------------|
| MIR22HG | SH3RF1   | 0.437256076 | 0           |
| MIR22HG | CRELD2   | 0.604461203 | 0           |
| MIR22HG | PCP4     | 0.125169992 | 0.008689196 |
| MIR22HG | GCSH     | 0.542537665 | 0           |
| MIR22HG | IMPA2    | 0.480633274 | 0           |
| MIR22HG | C1R      | 0.161880987 | 0.000672426 |
| MIR22HG | SUCNR1   | 0.42218815  | 0           |
| MIR22HG | SFRP1    | 0.503424941 | 0           |
| MIR22HG | UGT8     | 0.380079259 | 5.63E-17    |
| MIR22HG | TLE4     | 0.431678472 | 0           |
| MIR22HG | ANTXR1   | 0.509572021 | 0           |
| MIR22HG | GPX3     | 0.37475909  | 3.34E-16    |
| MIR22HG | DPY19L2  | 0.576833741 | 0           |
| MIR22HG | FAM46C   | 0.353853148 | 2.85E-14    |
| MIR22HG | IL33     | 0.419110157 | 4.21E-20    |
| MIR22HG | PEG3     | 0.54922486  | 0           |
| MIR22HG | FAHD2A   | 0.514389661 | 0           |
| MIR22HG | PTGDS    | 0.151288165 | 0.001493138 |
| MIR22HG | CHCHD10  | 0.260365599 | 3.49E-08    |
| MIR22HG | CD36     | 0.550894283 | 0           |
| MIR22HG | ANKRD37  | 0.68449862  | 0           |
| MIR22HG | TSPAN33  | 0.454181075 | 0           |
| MIR22HG | PRDM16   | 0.493061611 | 0           |
| MIR22HG | UST      | 0.525606708 | 0           |
| MIR22HG | NEXN     | 0.651926006 | 0           |
| MIR22HG | NUPR1L   | 0.198864026 | 2.71E-05    |
| MIR22HG | SLC24A3  | 0.500759822 | 0           |
| MIR22HG | MARC1    | 0.606922503 | 0           |
| MIR22HG | MYH11    | 0.44617834  | 0           |
| MIR22HG | APOA1    | 0.528835437 | 5.33E-33    |
| MIR22HG | TMEM178B | 0.647614725 | 0           |
| MIR22HG | CAPNG    | 0.493585624 | 2.45E-28    |
| MIR22HG | PPM1L    | 0.62321349  | 0           |
| MIR22HG | FZD8     | 0.591306944 | 0           |
| MIR22HG | RCAN2    | 0.641707634 | 0           |
| MIR22HG | COPZ2    | 0.512511028 | 0           |
| MIR22HG | GAS1     | 0.347012201 | 9.81E-14    |
| MIR22HG | DACT1    | 0.434059067 | 0           |
| MIR22HG | WBSCR17  | 0.601036262 | 0           |
| MIR22HG | NCS1     | 0.466189432 | 0           |
| MIR22HG | SPIRE2   | 0.451352559 | 0           |
| MIR22HG | C15orf52 | 0.449108554 | 0           |
| MIR22HG | SPAG5    | 0.464663832 | 0           |
| MIR22HG | ARL4D    | 0.402304995 | 0           |
| MIR22HG | FAM189A2 | 0.494797414 | 0           |
| MIR22HG | MAP1LC3A | 0.559678824 | 0           |
| MIR22HG | KLF6     | 0.415835548 | 0           |
| MIR22HG | ADD3     | 0.407697359 | 0           |
| MIR22HG | TSPAN7   | 0.508320875 | 0           |
| MIR22HG | KLF9     | 0.532568926 | 0           |
| MIR22HG | KCNQ1    | 0.442231438 | 0           |

|         |          |              |             |
|---------|----------|--------------|-------------|
| MIR22HG | MAN1A1   | 0.353356718  | 3.12E-14    |
| MIR22HG | MLF1     | 0.44542476   | 0           |
| MIR22HG | RARB     | 0.580052026  | 0           |
| MIR22HG | CDC42EP2 | 0.446787814  | 0           |
| MIR22HG | FAM3B    | 0.271908163  | 8.09E-09    |
| MIR22HG | GADD45B  | 0.436699081  | 0           |
| MIR22HG | TMEM47   | 0.617739996  | 0           |
| MIR22HG | SDF2L1   | 0.515434007  | 0           |
| MIR22HG | CCDC85A  | 0.453424799  | 0           |
| MIR22HG | CRYBG3   | 0.295947713  | 3.09E-10    |
| MIR22HG | FBLN2    | 0.286069892  | 1.23E-09    |
| MIR22HG | PEBP4    | 0.121097564  | 0.011142988 |
| MIR22HG | CDADC1   | 0.616989677  | 0           |
| MIR22HG | FAM63A   | 0.401982316  | 0           |
| MIR22HG | GLUL     | 0.380524911  | 4.56E-17    |
| MIR22HG | FREM2    | 0.330935246  | 1.50E-12    |
| MIR22HG | ACKR3    | 0.555714476  | 0           |
| MIR22HG | DENND6A  | 0.609411177  | 0           |
| MIR22HG | CLDN8    | 0.133755535  | 0.005027997 |
| MIR22HG | UTS2R    | 0.338696711  | 3.03E-13    |
| MIR22HG | SCNN1B   | 0.314931904  | 1.88E-11    |
| MIR22HG | TTC30A   | 0.508896592  | 0           |
| MIR22HG | CORO2B   | 0.60738475   | 0           |
| MIR22HG | TC2N     | 0.400311333  | 0           |
| MIR22HG | ALDH2    | 0.461851769  | 0           |
| MIR22HG | GPR183   | 0.342175129  | 2.28E-13    |
| MIR22HG | C4orf47  | 0.533273431  | 0           |
| MIR22HG | SLC25A42 | 0.526182     | 0           |
| MIR22HG | LGMN     | 0.526114911  | 0           |
| MIR22HG | ACSF2    | 0.427207199  | 0           |
| MIR22HG | KIAA1467 | 0.524186209  | 0           |
| MIR22HG | PRKG1    | 0.614020033  | 0           |
| MIR22HG | GNAI1    | 0.623929768  | 0           |
| MIR22HG | ABCC4    | 0.48821532   | 0           |
| MIR22HG | PRPS1    | 0.526856861  | 0           |
| MIR22HG | TSPAN5   | 0.351034135  | 4.77E-14    |
| MIR22HG | CR2      | 0.199311976  | 2.59E-05    |
| MIR22HG | CCDC170  | 0.455173793  | 0           |
| MIR22HG | RRAD     | 0.319670824  | 9.02E-12    |
| MIR22HG | SCGB2A1  | 0.330467467  | 1.62E-12    |
| MIR22HG | SESN3    | 0.395142078  | 0           |
| MIR22HG | SGK223   | 0.313307869  | 2.40E-11    |
| MIR22HG | NDRG2    | 0.577613846  | 0           |
| MIR22HG | C3orf52  | 0.582047816  | 0           |
| MIR22HG | FLRT3    | -0.066495517 | 0.164224453 |
| MIR22HG | MST1R    | -0.417184419 | 0           |
| MIR22HG | SDC1     | -0.298707155 | 2.08E-10    |
| MIR22HG | ST8SIA4  | -0.425342182 | 0           |
| MIR22HG | UBTD1    | -0.383778371 | 0           |
| MIR22HG | EPHA2    | -0.038445805 | 0.42151964  |
| MIR22HG | TMEM130  | -0.114761132 | 0.016186591 |



|         |          |              |             |
|---------|----------|--------------|-------------|
| MIR22HG | SPINK2   | -0.4220361   | 0           |
| MIR22HG | MMP16    | -0.360818911 | 7.54E-15    |
| MIR22HG | SIGLEC15 | -0.363324747 | 4.56E-15    |
| MIR22HG | RIN1     | -0.450790175 | 0           |
| MIR22HG | IL1RN    | -0.388928761 | 0           |
| MIR22HG | FCER1G   | -0.209042259 | 1.05E-05    |
| MIR22HG | CD276    | -0.423769776 | 0           |
| MIR22HG | CTSB     | -0.553775279 | 0           |
| MIR22HG | FAM171A2 | -0.161869924 | 0.000673003 |
| MIR22HG | ASPHD1   | -0.518475563 | 0           |
| MIR22HG | C15orf48 | -0.422897335 | 0           |
| MIR22HG | DYSF     | -0.055020042 | 0.249878324 |
| MIR22HG | PDZRN4   | -0.032973871 | 0.490612878 |
| MIR22HG | EFHD2    | -0.028918747 | 0.545490592 |
| MIR22HG | ASF1B    | -0.417295762 | 0           |
| MIR22HG | AQP1     | -0.024449743 | 0.609291131 |
| MIR22HG | ARRDC2   | -0.319034118 | 9.96E-12    |
| MIR22HG | PRSS1    | -0.339246556 | 2.76E-13    |
| MIR22HG | MAPK13   | -0.438018166 | 0           |
| MIR22HG | CST5     | -0.406229541 | 7.14E-19    |
| MIR22HG | AHR      | -0.260061217 | 3.62E-08    |
| MIR22HG | BAX      | -0.309369903 | 4.35E-11    |
| MIR22HG | C1orf115 | -0.357602328 | 1.41E-14    |
| MIR22HG | PLK3     | -0.011223714 | 0.814524421 |
| MIR22HG | JAG2     | -0.107367588 | 0.024509379 |
| MIR22HG | RAD23B   | -0.462683076 | 0           |
| MIR22HG | CA12     | 0.152496759  | 0.001366599 |
| MIR22HG | ADTRP    | -0.331303455 | 1.41E-12    |
| MIR22HG | UCP2     | -0.279621125 | 2.93E-09    |
| MIR22HG | IGFBP2   | -0.129930755 | 0.006440129 |
| MIR22HG | LOXL2    | -0.145843179 | 0.00220786  |
| MIR22HG | GPX1     | -0.329582403 | 1.87E-12    |
| MIR22HG | P3H3     | -0.447115175 | 0           |
| MIR22HG | C2orf81  | -0.439228321 | 0           |
| MIR22HG | CDT1     | -0.554865155 | 0           |
| MIR22HG | SNX25    | -0.096100897 | 0.044203122 |
| MIR22HG | MTHFD1L  | -0.346336205 | 1.11E-13    |
| MIR22HG | CDC42BPG | -0.425628495 | 9.60E-21    |
| MIR22HG | MSN      | -0.474905182 | 0           |
| MIR22HG | SIGLEC6  | -0.390635594 | 1.87E-17    |
| MIR22HG | F2R      | 0.093953199  | 0.049178896 |
| MIR22HG | TMEM184A | -0.461740569 | 0           |
| MIR22HG | CKS2     | -0.24558844  | 2.06E-07    |
| MIR22HG | TAX1BP3  | -0.431912362 | 0           |
| MIR22HG | PMEP1    | -0.296685692 | 2.78E-10    |
| MIR22HG | CXCL16   | -0.417112792 | 0           |
| MIR22HG | FAXC     | -0.419339209 | 0           |
| MIR22HG | VTCN1    | -0.448383057 | 4.23E-23    |
| MIR22HG | SH2D4A   | -0.472018229 | 0           |
| MIR22HG | RNF24    | -0.368112885 | 1.66E-15    |
| MIR22HG | LY6G6C   | -0.499893941 | 3.93E-29    |

|         |          |              |             |
|---------|----------|--------------|-------------|
| MIR22HG | NID1     | -0.108508384 | 0.023022996 |
| MIR22HG | STAC     | -0.549886247 | 0           |
| MIR22HG | RAB34    | -0.48446231  | 0           |
| MIR22HG | HES4     | -0.147722663 | 0.0019318   |
| MIR22HG | EPHA10   | -0.575188289 | 0           |
| MIR22HG | ENTPD2   | -0.435331204 | 0           |
| MIR22HG | DDB2     | -0.505790501 | 0           |
| MIR22HG | NKAIN4   | -0.122808545 | 0.010045736 |
| MIR22HG | TRIM29   | -0.304788847 | 8.59E-11    |
| MIR22HG | ADCY8    | -0.518822862 | 1.28E-31    |
| MIR22HG | SFTA2    | -0.386052304 | 0           |
| MIR22HG | NRIP1    | -0.402670226 | 0           |
| MIR22HG | VWA1     | 0.026484113  | 0.579837517 |
| MIR22HG | APLNR    | -0.055270951 | 0.247722722 |
| MIR22HG | REN      | -0.469072179 | 2.12E-25    |
| MIR22HG | EDIL3    | -0.090557051 | 0.057998764 |
| MIR22HG | AGRN     | -0.24420567  | 2.42E-07    |
| MIR22HG | TREM1    | -0.20299021  | 1.90E-05    |
| MIR22HG | SRL      | -0.119037947 | 0.01260367  |
| MIR22HG | RASGRF1  | -0.359842788 | 9.13E-15    |
| MIR22HG | RMI2     | -0.519425304 | 0           |
| MIR22HG | SAMD1    | -0.525529691 | 0           |
| MIR22HG | MGAT4B   | -0.553538978 | 0           |
| MIR22HG | NXN      | -0.391361977 | 0           |
| MIR22HG | SH3BGRL3 | -0.458779293 | 0           |
| MIR22HG | CA11     | -0.420598297 | 0           |
| MIR22HG | PLD3     | -0.213917201 | 6.45E-06    |
| MIR22HG | LURAP1L  | -0.386088756 | 0           |
| MIR22HG | CARNS1   | -0.23858126  | 4.60E-07    |
| MIR22HG | PDLIM7   | -0.240262739 | 3.80E-07    |
| MIR22HG | BCL2L1   | -0.425105881 | 0           |
| MIR22HG | GGT6     | -0.305136915 | 8.16E-11    |
| MIR22HG | DPYSL3   | -0.149468394 | 0.00170408  |
| MIR22HG | FYN      | -0.41853712  | 0           |
| MIR22HG | TK1      | -0.394596856 | 0           |
| MIR22HG | AK1      | -0.270163992 | 1.01E-08    |
| MIR22HG | HIGD1B   | -0.008343144 | 0.861564796 |
| MIR22HG | TMEM59L  | -0.147984778 | 0.001895919 |
| MIR22HG | MEGF9    | -0.34232108  | 2.22E-13    |
| MIR22HG | ZFP36L1  | -0.234197074 | 7.51E-07    |
| MIR22HG | ADRA1B   | -0.108742841 | 0.022727379 |
| MIR22HG | EPHA4    | -0.290720731 | 6.44E-10    |
| MIR22HG | TCERG1L  | -0.077475129 | 0.104980852 |
| MIR22HG | NGFR     | -0.182932312 | 0.000118962 |
| MIR22HG | EBI3     | -0.460038665 | 0           |
| MIR22HG | S100A10  | -0.254455246 | 7.19E-08    |
| MIR22HG | S100B    | -0.343546978 | 1.80E-13    |
| MIR22HG | CD44     | -0.211476751 | 8.25E-06    |
| MIR22HG | BHLHE41  | -0.471632148 | 0           |
| MIR22HG | FBXO2    | -0.303251616 | 1.08E-10    |
| MIR22HG | SLC30A2  | -0.370459723 | 9.76E-16    |

|         |          |              |             |
|---------|----------|--------------|-------------|
| MIR22HG | FRMD5    | -0.524867453 | 0           |
| MIR22HG | SAMD11   | -0.270671202 | 9.49E-09    |
| MIR22HG | SIPAIL2  | -0.284461742 | 1.53E-09    |
| MIR22HG | S100A16  | -0.428374376 | 0           |
| MIR22HG | PPL      | -0.477389317 | 0           |
| MIR22HG | ARHGDIB  | -0.013792243 | 0.773129791 |
| MIR22HG | CDC42EP3 | -0.427159825 | 0           |
| MIR22HG | RUNX2    | -0.396915184 | 0           |
| MIR22HG | LAMC2    | -0.421414996 | 0           |
| MIR22HG | BRINP1   | -0.440397201 | 0           |
| MIR22HG | GPRC5B   | -0.492184916 | 0           |
| MIR22HG | AQP5     | 0.032955148  | 0.490859265 |
| MIR22HG | PLAG1    | -0.361844819 | 6.15E-15    |
| MIR22HG | PTPRU    | -0.417238885 | 0           |
| MIR22HG | ANGPTL4  | -0.198938207 | 2.79E-05    |
| MIR22HG | PALM3    | -0.381603724 | 2.43E-17    |
| MIR22HG | ACP5     | -0.297308499 | 2.54E-10    |
| MIR22HG | DLG4     | -0.316963437 | 1.37E-11    |
| MIR22HG | ETNK2    | -0.473272211 | 0           |
| MIR22HG | CD109    | -0.277405061 | 3.94E-09    |
| MIR22HG | SNX22    | -0.137273522 | 0.003982469 |
| MIR22HG | TMEM98   | -0.472630965 | 0           |
| MIR22HG | CTHRC1   | -0.232883804 | 8.69E-07    |
| MIR22HG | S100A2   | -0.32437386  | 4.31E-12    |
| MIR22HG | C11orf80 | -0.618248056 | 0           |
| MIR22HG | SREBF1   | -0.318120686 | 1.15E-11    |
| MIR22HG | PRSS22   | -0.479788776 | 0           |
| MIR22HG | CMTM3    | -0.351586023 | 4.32E-14    |
| MIR22HG | RDH5     | -0.427285067 | 0           |
| MIR22HG | MYH10    | -0.301878065 | 1.31E-10    |
| MIR22HG | EVPL     | -0.3793305   | 7.73E-17    |
| MIR22HG | SCD      | -0.346734058 | 1.03E-13    |
| MIR22HG | CD151    | -0.364169529 | 3.84E-15    |
| MIR22HG | S100A4   | -0.332337306 | 1.19E-12    |
| MIR22HG | BNIP1    | -0.357135968 | 1.54E-14    |
| MIR22HG | MAP3K6   | -0.432627646 | 0           |
| MIR22HG | MANEAL   | -0.5060529   | 0           |
| MIR22HG | CD207    | -0.358893443 | 8.62E-15    |
| MIR22HG | CD1A     | -0.362288214 | 4.62E-15    |
| MIR22HG | C3       | -0.25195792  | 9.71E-08    |
| MIR22HG | NT5E     | -0.286668019 | 1.13E-09    |
| MIR22HG | CACNG4   | -0.35514511  | 1.70E-14    |
| MIR22HG | FHOD1    | -0.381602306 | 2.44E-17    |
| MIR22HG | LEMD1    | -0.5098947   | 0           |
| MIR22HG | ATP11A   | -0.102020612 | 0.032631659 |
| MIR22HG | PPAP2C   | -0.329025976 | 2.04E-12    |
| MIR22HG | DRAM1    | -0.345255973 | 1.34E-13    |
| MIR22HG | CDA      | -0.080036566 | 0.093954105 |
| MIR22HG | CCND2    | -0.17448733  | 0.000244042 |
| MIR22HG | LCN6     | -0.149492016 | 0.001684049 |
| MIR22HG | CDH4     | -0.474603636 | 0           |

|         |          |              |             |
|---------|----------|--------------|-------------|
| MIR22HG | MMP11    | -0.385485381 | 0           |
| MIR22HG | B3GAT1   | -0.315524783 | 1.71E-11    |
| MIR22HG | SPP1     | -0.212578968 | 7.39E-06    |
| MIR22HG | HLA-DQB1 | -0.328837333 | 2.11E-12    |
| MIR22HG | SDC3     | -0.336757518 | 5.72E-13    |
| MIR22HG | CX3CL1   | -0.178689397 | 0.000171367 |
| MIR22HG | SDK1     | -0.214654896 | 5.99E-06    |
| MIR22HG | DOCK9    | -0.392146194 | 0           |
| MIR22HG | CSF2     | -0.406583951 | 6.62E-19    |
| MIR22HG | GRHL3    | -0.391988755 | 0           |
| MIR22HG | TMEM92   | -0.532094133 | 1.85E-33    |
| MIR22HG | BASP1    | -0.413731536 | 0           |
| MIR22HG | HRH1     | -0.365582936 | 2.86E-15    |
| MIR22HG | ESM1     | 0.039914387  | 0.403993883 |
| MIR22HG | B4GALNT3 | -0.459261823 | 0           |
| MIR22HG | LMO3     | -0.215049912 | 5.75E-06    |
| MIR22HG | C9orf16  | -0.488763521 | 0           |
| MIR22HG | SEMA3F   | -0.127807879 | 0.007369012 |
| MIR22HG | PLA2G12B | -0.304398404 | 7.27E-11    |
| MIR22HG | KLK6     | -0.41217662  | 1.96E-19    |
| MIR22HG | ST3GAL5  | -0.219021778 | 3.82E-06    |
| MIR22HG | FAM132B  | -0.177000684 | 0.000197716 |
| MIR22HG | CDKN1A   | 0.027996522  | 0.55838191  |
| MIR22HG | E2F1     | -0.47966552  | 0           |
| MIR22HG | B3GNT8   | -0.35850342  | 1.18E-14    |
| MIR22HG | MTMR11   | -0.45706973  | 0           |
| MIR22HG | MYO1G    | -0.274510733 | 5.76E-09    |
| MIR22HG | TMSB10   | -0.400698264 | 0           |
| MIR22HG | UNC5CL   | -0.527690296 | 0           |
| MIR22HG | ABR      | -0.373978134 | 4.11E-16    |
| MIR22HG | PLP2     | -0.502718167 | 0           |
| MIR22HG | SRCIN1   | -0.583929853 | 0           |
| MIR22HG | PDE9A    | -0.50925927  | 0           |
| MIR22HG | TREM2    | -0.251872959 | 9.81E-08    |
| MIR22HG | KDEL3    | -0.246795757 | 1.79E-07    |
| MIR22HG | PC       | -0.467625817 | 0           |
| MIR22HG | C2CD4A   | -0.567792901 | 0           |
| MIR22HG | PELI1    | -0.155380733 | 0.001103467 |
| MIR22HG | SSX1     | -0.169393249 | 0.000370691 |
| MIR22HG | MROH6    | -0.440789948 | 0           |
| MIR22HG | ESPN     | -0.453208072 | 0           |
| MIR22HG | BMP1     | -0.249089831 | 1.37E-07    |
| MIR22HG | TM4SF4   | -0.295958986 | 2.52E-10    |
| MIR22HG | CORO2A   | -0.466669125 | 0           |
| MIR22HG | CD164L2  | -0.486587189 | 1.79E-27    |
| MIR22HG | CTSS     | -0.345635671 | 1.25E-13    |
| MIR22HG | CLU      | -0.338772598 | 4.07E-13    |
| MIR22HG | TMSB4X   | -0.303819674 | 9.90E-11    |
| MIR22HG | WNT10A   | -0.403104404 | 1.39E-18    |
| MIR22HG | NAPSA    | -0.198523759 | 2.90E-05    |
| MIR22HG | PLEKHA4  | -0.46024674  | 0           |

|         |          |              |             |
|---------|----------|--------------|-------------|
| MIR22HG | SFTPA1   | 0.038916079  | 0.416008363 |
| MIR22HG | C1orf116 | -0.428599188 | 0           |
| MIR22HG | TM4SF1   | -0.215242669 | 5.64E-06    |
| MIR22HG | SEL1L3   | -0.339139247 | 3.83E-13    |
| MIR22HG | VASN     | -0.510218372 | 0           |
| MIR22HG | NPTXR    | -0.618825191 | 0           |
| MIR22HG | PDE4C    | -0.437460747 | 0           |
| MIR22HG | CDC42EP1 | -0.426386245 | 0           |
| MIR22HG | ENDOD1   | -0.52923008  | 0           |
| MIR22HG | RYR1     | -0.38706956  | 0           |
| MIR22HG | IL1RAP   | -0.291947055 | 5.43E-10    |
| MIR22HG | SLC35F2  | -0.584965569 | 1.17E-41    |
| MIR22HG | ISYNA1   | -0.294968186 | 3.55E-10    |
| MIR22HG | HLA-G    | -0.371216424 | 8.17E-16    |
| MIR22HG | CDKN2B   | -0.316315525 | 1.52E-11    |
| MIR22HG | ALDH1A3  | -0.223632761 | 2.36E-06    |
| MIR22HG | CLIP3    | -0.360031289 | 8.80E-15    |
| MIR22HG | ULBP2    | -0.279658428 | 2.92E-09    |
| MIR22HG | ETHE1    | -0.556802934 | 0           |
| MIR22HG | XPR1     | -0.296364289 | 2.91E-10    |
| MIR22HG | SPTBN2   | -0.599572219 | 0           |
| MIR22HG | IVL      | -0.386201521 | 4.59E-17    |
| MIR22HG | MARCO    | -0.322431542 | 5.86E-12    |
| MIR22HG | PLXND1   | -0.127411586 | 0.007555129 |
| MIR22HG | EMILIN2  | -0.316943013 | 1.38E-11    |
| MIR22HG | PLAUR    | -0.273080305 | 6.95E-09    |
| MIR22HG | CDC42EP5 | -0.45050182  | 0           |
| MIR22HG | TRPC5    | -0.23759628  | 4.75E-07    |
| MIR22HG | TMEM100  | -0.202937305 | 1.91E-05    |
| MIR22HG | QSOX1    | -0.448401637 | 0           |
| MIR22HG | ARHGAP23 | -0.240447837 | 3.72E-07    |
| MIR22HG | MDF1     | -0.102455201 | 0.031894986 |
| MIR22HG | FSTL3    | -0.362895548 | 4.98E-15    |
| MIR22HG | INF2     | -0.471232309 | 0           |
| MIR22HG | TGFBR1   | -0.480817379 | 0           |
| MIR22HG | TGFBI    | -0.258894748 | 4.19E-08    |
| MIR22HG | ERBB3    | -0.67631249  | 0           |
| MIR22HG | CCL18    | -0.13262254  | 0.005413993 |
| MIR22HG | CCL17    | -0.310659426 | 2.82E-11    |
| MIR22HG | C16orf45 | -0.313799051 | 2.23E-11    |
| MIR22HG | PRDM1    | -0.098017401 | 0.04012756  |
| MIR22HG | TRIM47   | -0.508797874 | 0           |
| MIR22HG | CNFN     | -0.48817362  | 0           |
| MIR22HG | ARMCX3   | -0.367385545 | 1.95E-15    |
| MIR22HG | RAMP1    | -0.277351305 | 3.96E-09    |
| MIR22HG | GABRD    | 0.001118244  | 0.981354201 |
| MIR22HG | COL13A1  | -0.219949109 | 3.47E-06    |
| MIR22HG | S100A5   | -0.486856379 | 0           |
| MIR22HG | MISP     | -0.375887688 | 2.43E-16    |
| MIR22HG | HES6     | -0.205302156 | 1.52E-05    |
| MIR22HG | PSD3     | -0.40201352  | 0           |

|         |           |              |             |
|---------|-----------|--------------|-------------|
| MIR22HG | DOK7      | -0.428655781 | 0           |
| MIR22HG | ZMAT3     | -0.376888916 | 1.81E-16    |
| MIR22HG | MFAP2     | -0.32063475  | 7.76E-12    |
| MIR22HG | TMEM79    | -0.584735488 | 0           |
| MIR22HG | SLC1A5    | -0.364490223 | 3.59E-15    |
| MIR22HG | BBC3      | -0.460196388 | 0           |
| MIR22HG | HLA-DQB2  | -0.359558972 | 9.65E-15    |
| MIR22HG | C1QL1     | -0.35855675  | 1.17E-14    |
| MIR22HG | TMEM215   | -0.15980159  | 0.000778614 |
| MIR22HG | PNP       | -0.293478187 | 4.38E-10    |
| MIR22HG | ARNTL     | -0.375775211 | 2.51E-16    |
| MIR22HG | CLDN2     | -0.304828289 | 6.82E-11    |
| MIR22HG | MVP       | -0.492620072 | 0           |
| MIR22HG | LGALS1    | -0.301992954 | 1.29E-10    |
| MIR22HG | BIRC7     | -0.407869271 | 5.01E-19    |
| MIR22HG | COL8A1    | -0.419722453 | 0           |
| MIR22HG | PERP      | -0.54939237  | 0           |
| MIR22HG | GJA4      | -0.148739352 | 0.001796006 |
| MIR22HG | IGFL2     | -0.32670235  | 2.23E-12    |
| MIR22HG | DAPK2     | -0.426869201 | 0           |
| MIR22HG | MAMLD1    | -0.432824942 | 0           |
| MIR22HG | ETV5      | -0.218308053 | 4.12E-06    |
| MIR22HG | RUNX1     | -0.442221652 | 0           |
| MIR22HG | LONRF2    | -0.210795082 | 8.83E-06    |
| MIR22HG | SPOCK1    | -0.021259968 | 0.656756608 |
| MIR22HG | XKRX      | -0.226849627 | 1.67E-06    |
| MIR22HG | TGFB1     | -0.138280707 | 0.003721757 |
| MIR22HG | ERP27     | -0.190332097 | 6.17E-05    |
| MIR22HG | TNFRSF10C | -0.265083528 | 1.94E-08    |
| MIR22HG | PALM      | -0.487716053 | 0           |
| MIR22HG | TSC22D1   | -0.213816922 | 6.52E-06    |
| MIR22HG | TGM2      | -0.332466094 | 1.17E-12    |
| MIR22HG | UBE2QL1   | -0.290788671 | 6.38E-10    |
| MIR22HG | ECE1      | -0.364006275 | 3.97E-15    |
| MIR22HG | COL8A2    | -0.363479492 | 4.42E-15    |
| MIR22HG | HIST3H2A  | -0.426172497 | 0           |
| MIR22HG | TNFRSF21  | -0.245013574 | 2.20E-07    |
| MIR22HG | SOX4      | -0.462052894 | 0           |
| MIR22HG | ELF3      | -0.447649333 | 0           |
| MIR22HG | TPD52L1   | -0.500150064 | 0           |
| MIR22HG | INHBB     | -0.255117484 | 6.64E-08    |
| MIR22HG | HPN       | -0.448509292 | 0           |
| MIR22HG | MMP7      | -0.32489604  | 2.99E-12    |
| MIR22HG | RAB27A    | -0.379504535 | 7.20E-17    |
| MIR22HG | IGF2BP2   | -0.454587296 | 0           |
| MIR22HG | ITGB4     | -0.351244053 | 4.60E-14    |
| MIR22HG | PPP1R1B   | -0.465725483 | 0           |
| MIR22HG | NPDC1     | -0.280954394 | 2.45E-09    |
| MIR22HG | CCL13     | -0.374379028 | 4.71E-16    |
| MIR22HG | SPINT1    | -0.634592516 | 0           |
| MIR22HG | HEY2      | -0.292685034 | 4.89E-10    |

|         |            |              |             |
|---------|------------|--------------|-------------|
| MIR22HG | CST2       | -0.389625726 | 2.30E-17    |
| MIR22HG | ADM        | -0.324611012 | 4.15E-12    |
| MIR22HG | VSTM2L     | -0.275465439 | 5.08E-09    |
| MIR22HG | FAM84A     | -0.346619737 | 1.05E-13    |
| MIR22HG | P4HA2      | -0.398997211 | 0           |
| MIR22HG | LPL        | -0.117140734 | 0.014096184 |
| MIR22HG | TMEM173    | -0.258350236 | 4.47E-08    |
| MIR22HG | DHRS3      | -0.509206365 | 0           |
| MIR22HG | SCN1B      | -0.47149485  | 0           |
| MIR22HG | GLT1D1     | -0.201291569 | 2.23E-05    |
| MIR22HG | PHYHIP     | -0.430174999 | 0           |
| MIR22HG | BHLHE40    | -0.247883081 | 1.57E-07    |
| MIR22HG | BID        | -0.497179001 | 0           |
| MIR22HG | POSTN      | -0.2549643   | 6.76E-08    |
| MIR22HG | ITGA3      | -0.588055328 | 0           |
| MIR22HG | RSPO4      | -0.421148767 | 0           |
| MIR22HG | ADAMTS9    | -0.056322957 | 0.238826252 |
| MIR22HG | ABTB2      | -0.483374561 | 0           |
| MIR22HG | KCNQ3      | -0.483432572 | 0           |
| MIR22HG | ANXA1      | -0.282214475 | 2.07E-09    |
| MIR22HG | S100A11    | -0.472936624 | 0           |
| MIR22HG | CEACAM6    | -0.358414736 | 9.40E-15    |
| MIR22HG | IER5L      | -0.460188303 | 0           |
| MIR22HG | KRT80      | -0.447834289 | 0           |
| MIR22HG | CDH6       | -0.324470026 | 4.24E-12    |
| MIR22HG | UNC5B      | -0.33006238  | 1.73E-12    |
| MIR22HG | PLEKHN1    | -0.462581379 | 0           |
| MIR22HG | SYTL1      | -0.297607633 | 2.44E-10    |
| MIR22HG | TMEM163    | -0.289585041 | 7.55E-10    |
| MIR22HG | C4orf48    | -0.147719543 | 0.001932231 |
| MIR22HG | B3GNT7     | -0.299272234 | 1.92E-10    |
| MIR22HG | BAIAP3     | -0.470543123 | 0           |
| MIR22HG | PHLDA2     | -0.337764278 | 4.83E-13    |
| MIR22HG | GAP43      | -0.392439362 | 1.29E-17    |
| MIR22HG | S100A1     | -0.506178142 | 0           |
| MIR22HG | PTPRE      | -0.458342293 | 0           |
| MIR22HG | CCND1      | -0.323423409 | 5.01E-12    |
| MIR22HG | ST6GALNAC5 | -0.489182571 | 8.59E-28    |
| MIR22HG | KRT17      | -0.041182127 | 0.389220575 |
| MIR22HG | HPCAL4     | -0.322325874 | 5.95E-12    |
| MIR22HG | GABBR2     | -0.319279921 | 9.59E-12    |
| MIR22HG | DIRAS3     | -0.379218307 | 8.08E-17    |
| MIR22HG | SERINC2    | -0.479375746 | 0           |
| MIR22HG | PTCHD4     | -0.196150966 | 3.62E-05    |
| MIR22HG | EPS8       | -0.307007605 | 6.19E-11    |
| MIR22HG | LY6E       | -0.465210756 | 0           |
| MIR22HG | UPP1       | -0.382128947 | 1.61E-17    |
| MIR22HG | AHNAK2     | -0.518537404 | 0           |
| MIR22HG | PLXNC1     | -0.400776133 | 0           |
| MIR22HG | TNC        | -0.286286902 | 1.19E-09    |
| MIR22HG | DUSP4      | -0.235309645 | 6.64E-07    |

|         |         |              |             |
|---------|---------|--------------|-------------|
| MIR22HG | NRCAM   | -0.34346684  | 1.82E-13    |
| MIR22HG | NRP2    | -0.336463206 | 6.01E-13    |
| MIR22HG | CTSC    | -0.427240672 | 0           |
| MIR22HG | AMIGO2  | -0.204346315 | 1.66E-05    |
| MIR22HG | NAB2    | -0.345387882 | 1.31E-13    |
| MIR22HG | TBC1D2  | -0.535335743 | 0           |
| MIR22HG | PHLDA3  | -0.485182417 | 0           |
| MIR22HG | PTP4A3  | -0.336357963 | 6.12E-13    |
| MIR22HG | CRABP2  | -0.400128363 | 0           |
| MIR22HG | GOS2    | -0.28379298  | 1.67E-09    |
| MIR22HG | S100A6  | -0.551919907 | 0           |
| MIR22HG | FOXQ1   | -0.343954901 | 1.68E-13    |
| MIR22HG | LRG1    | -0.399228548 | 0           |
| MIR22HG | LAMP5   | -0.272197227 | 7.79E-09    |
| MIR22HG | ALDH3B1 | -0.500010212 | 0           |
| MIR22HG | CDH2    | 0.041993578  | 0.379938987 |
| MIR22HG | SCG5    | -0.265404363 | 1.86E-08    |
| MIR22HG | ZCCHC16 | -0.28670642  | 9.42E-10    |
| MIR22HG | GRB7    | -0.557807425 | 0           |
| MIR22HG | TIAM1   | -0.239515683 | 4.14E-07    |
| MIR22HG | FXD5    | -0.309272461 | 4.42E-11    |
| MIR22HG | CLDN9   | -0.396997875 | 0           |
| MIR22HG | FAM43A  | -0.46549599  | 0           |
| MIR22HG | CHST2   | -0.341345098 | 2.63E-13    |
| MIR22HG | HMGA2   | -0.359612302 | 9.55E-15    |
| MIR22HG | GALNT7  | -0.468959795 | 0           |
| MIR22HG | CBLN1   | -0.330345912 | 1.65E-12    |
| MIR22HG | STRA6   | -0.417800418 | 0           |
| MIR22HG | MUC21   | -0.475064064 | 4.26E-26    |
| MIR22HG | PRR36   | -0.50396449  | 0           |
| MIR22HG | NFE2L3  | -0.367025704 | 2.10E-15    |
| MIR22HG | NR1D1   | -0.452713061 | 0           |
| MIR22HG | MUC1    | -0.53226582  | 0           |
| MIR22HG | NAT8L   | -0.180878369 | 0.000142097 |
| MIR22HG | APOC1   | -0.071567754 | 0.134313151 |
| MIR22HG | EVA1A   | -0.404818349 | 0           |
| MIR22HG | ENTPD1  | -0.15106392  | 0.001517768 |
| MIR22HG | COL1A1  | -0.275692236 | 4.93E-09    |
| MIR22HG | FNDC4   | -0.25451808  | 7.14E-08    |
| MIR22HG | FRMD3   | -0.178126729 | 0.000179757 |
| MIR22HG | SHROOM4 | -0.352071531 | 3.95E-14    |
| MIR22HG | NELL2   | -0.19995135  | 2.53E-05    |
| MIR22HG | EPHB3   | -0.524877665 | 0           |
| MIR22HG | TMC6    | -0.464481287 | 0           |
| MIR22HG | NOD1    | -0.440477055 | 0           |
| MIR22HG | GGCT    | -0.609635138 | 0           |
| MIR22HG | ICAM1   | -0.370797295 | 9.02E-16    |
| MIR22HG | PRSS23  | -0.23742628  | 5.24E-07    |
| MIR22HG | CFI     | -0.326049808 | 3.30E-12    |
| MIR22HG | CD55    | -0.402146279 | 0           |
| MIR22HG | RASD2   | -0.418971142 | 0           |



|         |           |              |             |
|---------|-----------|--------------|-------------|
| MIR22HG | KLK11     | -0.399569363 | 2.94E-18    |
| MIR22HG | ICAM5     | -0.318335711 | 1.11E-11    |
| MIR22HG | ADORA1    | -0.519889537 | 0           |
| MIR22HG | ITGA2     | -0.421490311 | 0           |
| MIR22HG | ABCC3     | -0.307020512 | 6.18E-11    |
| MIR22HG | MFGE8     | -0.445784742 | 0           |
| MIR22HG | STK32A    | -0.248393978 | 1.48E-07    |
| MIR22HG | CYSLTR2   | -0.2060807   | 1.41E-05    |
| MIR22HG | LAD1      | -0.646515913 | 0           |
| MIR22HG | MGAT3     | -0.374708454 | 3.38E-16    |
| MIR22HG | IGFBP6    | -0.359738679 | 9.32E-15    |
| MIR22HG | CYP2S1    | -0.477337972 | 0           |
| MIR22HG | KCNJ2     | -0.35281646  | 3.45E-14    |
| MIR22HG | FAM20A    | -0.34522633  | 1.34E-13    |
| MIR22HG | TGFA      | -0.337798319 | 4.80E-13    |
| MIR22HG | MXRA8     | -0.480465197 | 0           |
| MIR22HG | C8orf4    | -0.044117021 | 0.356300081 |
| MIR22HG | CLDN10    | -0.41280446  | 1.71E-19    |
| MIR22HG | PDE5A     | -0.468526057 | 0           |
| MIR22HG | APOE      | -0.071905894 | 0.132479368 |
| MIR22HG | SPOCK2    | -0.307260075 | 5.96E-11    |
| MIR22HG | TENM1     | -0.177863763 | 0.000183808 |
| MIR22HG | SLIT1     | -0.134416922 | 0.004814316 |
| MIR22HG | CXCL14    | -0.095147468 | 0.046357111 |
| MIR22HG | ECM1      | -0.093337201 | 0.050689684 |
| MIR22HG | DUSP5     | -0.288339002 | 8.97E-10    |
| MIR22HG | SEZ6L2    | -0.444382399 | 0           |
| MIR22HG | THRSP     | -0.272417217 | 7.57E-09    |
| MIR22HG | C19orf33  | -0.439984029 | 0           |
| MIR22HG | MPZL2     | -0.344087803 | 1.64E-13    |
| MIR22HG | CTSH      | -0.505864398 | 0           |
| MIR22HG | CYP1B1    | -0.461040602 | 0           |
| MIR22HG | ALOX5     | -0.435229648 | 0           |
| MIR22HG | SYTL5     | -0.352135512 | 2.92E-14    |
| MIR22HG | TNFRSF12A | -0.247611179 | 1.62E-07    |
| MIR22HG | DUSP6     | -0.196383579 | 3.54E-05    |
| MIR22HG | ALOX15B   | -0.428803717 | 0           |
| MIR22HG | SDC4      | -0.414549937 | 0           |
| MIR22HG | MDK       | -0.368499392 | 1.52E-15    |
| MIR22HG | KRT19     | -0.474140112 | 0           |
| MIR22HG | MET       | -0.55127469  | 0           |
| MIR22HG | TESC      | -0.183478669 | 0.000113434 |
| MIR22HG | CXCL17    | -0.649632594 | 5.56E-54    |
| MIR22HG | NPC2      | -0.486351722 | 0           |
| MIR22HG | COMP      | -0.280022949 | 2.78E-09    |
| MIR22HG | TUSC3     | -0.301327596 | 1.42E-10    |
| MIR22HG | TMPRSS4   | -0.486899072 | 0           |
| MIR22HG | LGALS3    | -0.52949106  | 0           |
| MIR22HG | CRLF1     | -0.211119464 | 8.55E-06    |
| MIR22HG | CTXN1     | -0.437166718 | 0           |
| MIR22HG | PCSK1N    | -0.103527348 | 0.030138147 |

|         |          |              |             |
|---------|----------|--------------|-------------|
| MIR22HG | NMU      | -0.476976923 | 2.54E-26    |
| MIR22HG | GALE     | -0.505504415 | 0           |
| MIR22HG | PCSK2    | -0.067850061 | 0.155785983 |
| MIR22HG | GJB3     | -0.511345836 | 0           |
| MIR22HG | SLPI     | -0.325030708 | 3.88E-12    |
| MIR22HG | AGR2     | -0.108303571 | 0.023283956 |
| MIR22HG | MRC2     | -0.336232579 | 6.24E-13    |
| MIR22HG | GOLT1A   | -0.49198606  | 0           |
| MIR22HG | SLC27A6  | -0.329949418 | 1.31E-12    |
| MIR22HG | KCNN4    | -0.487728961 | 0           |
| MIR22HG | ETV4     | -0.341743176 | 1.80E-13    |
| MIR22HG | SYT12    | -0.535562824 | 0           |
| MIR22HG | PVRL4    | -0.659310189 | 0           |
| MIR22HG | PLCD3    | -0.548184059 | 0           |
| MIR22HG | PLAU     | -0.349738878 | 6.03E-14    |
| MIR22HG | LRRK2    | -0.102293223 | 0.032167876 |
| MIR22HG | SFN      | -0.421593427 | 0           |
| MIR22HG | LPAR5    | -0.457781611 | 0           |
| MIR22HG | NGEF     | -0.577040965 | 0           |
| MIR22HG | DTX4     | -0.57253948  | 0           |
| MIR22HG | CST6     | -0.423988063 | 0           |
| MIR22HG | QPCT     | -0.394161842 | 0           |
| MIR22HG | TIMP1    | -0.48325173  | 0           |
| MIR22HG | CAMK2N1  | -0.449523285 | 0           |
| MIR22HG | KLHDC8A  | -0.146814622 | 0.002060965 |
| MIR22HG | PDLIM4   | -0.536443491 | 0           |
| MIR22HG | SCEL     | -0.317661418 | 1.23E-11    |
| MIR22HG | LCN2     | -0.567778433 | 0           |
| MIR22HG | PROS1    | -0.593153096 | 0           |
| MIR22HG | GABRB2   | -0.485334324 | 0           |
| MIR22HG | TMPRSS6  | -0.558156486 | 0           |
| MIR22HG | KLK7     | -0.499167556 | 4.86E-29    |
| MIR22HG | PDZK1IP1 | -0.451502055 | 0           |
| MIR22HG | CDH3     | -0.411790779 | 0           |
| MIR22HG | LRP4     | -0.235818414 | 6.27E-07    |
| MIR22HG | IGSF1    | -0.152323434 | 0.001384119 |
| MIR22HG | B3GNT3   | -0.517460435 | 0           |
| MIR22HG | CLDN1    | -0.311314773 | 3.25E-11    |
| MIR22HG | GDF15    | -0.492468023 | 0           |
| MIR22HG | ARHGAP36 | -0.172102503 | 0.000291506 |
| MIR22HG | LAMB3    | -0.390699739 | 0           |
| MIR22HG | KLK10    | -0.577079261 | 0           |
| MIR22HG | DPP4     | -0.438495307 | 0           |
| MIR22HG | METTL7B  | -0.44201386  | 0           |
| MIR22HG | LIPH     | -0.513165606 | 0           |
| MIR22HG | CLDN16   | -0.334478337 | 8.36E-13    |
| MIR22HG | CHI3L1   | -0.558521007 | 0           |
| MIR22HG | SLC22A31 | -0.381298413 | 1.22E-16    |
| MIR22HG | TACSTD2  | -0.525015673 | 0           |
| MIR22HG | SFTPB    | -0.460236528 | 0           |
| MIR22HG | RXRG     | -0.415977385 | 0           |

|               |           |              |             |
|---------------|-----------|--------------|-------------|
| MIR22HG       | DCSTAMP   | -0.624749795 | 6.76E-49    |
| MIR22HG       | CITED1    | -0.535385244 | 0           |
| MIR22HG       | SERPINA1  | -0.590981712 | 0           |
| MIR22HG       | PRR15     | -0.314360017 | 2.05E-11    |
| MIR22HG       | SLC34A2   | -0.60892808  | 0           |
| MIR22HG       | FN1       | -0.570705243 | 0           |
| MIR22HG       | ZCCHC12   | -0.182268515 | 0.000126021 |
| RP11-1100L3.8 | TFF3      | 0.574170689  | 7.31E-40    |
| RP11-1100L3.8 | CCL21     | 0.436144715  | 8.23E-22    |
| RP11-1100L3.8 | TPO       | 0.49567035   | 1.34E-28    |
| RP11-1100L3.8 | MT1G      | 0.404887198  | 9.52E-19    |
| RP11-1100L3.8 | DIO1      | 0.48486477   | 2.89E-27    |
| RP11-1100L3.8 | DPT       | 0.385735915  | 5.04E-17    |
| RP11-1100L3.8 | CDH16     | 0.506307002  | 5.87E-30    |
| RP11-1100L3.8 | CRABP1    | 0.379401742  | 1.77E-16    |
| RP11-1100L3.8 | SLC26A7   | 0.454311204  | 9.63E-24    |
| RP11-1100L3.8 | MT1H      | 0.364136868  | 3.28E-15    |
| RP11-1100L3.8 | SLC26A4   | 0.435452678  | 9.70E-22    |
| RP11-1100L3.8 | SLC5A8    | 0.438978568  | 4.19E-22    |
| RP11-1100L3.8 | PKHD1L1   | 0.505520198  | 7.43E-30    |
| RP11-1100L3.8 | TFCP2L1   | 0.391240336  | 1.65E-17    |
| RP11-1100L3.8 | WSCD2     | 0.560695116  | 1.04E-37    |
| RP11-1100L3.8 | IPCEF1    | 0.460532891  | 1.97E-24    |
| RP11-1100L3.8 | SLC5A5    | 0.451863599  | 1.78E-23    |
| RP11-1100L3.8 | MT1F      | 0.45114625   | 2.13E-23    |
| RP11-1100L3.8 | FOSB      | 0.801796765  | 9.27E-100   |
| RP11-1100L3.8 | SEMA3D    | 0.544709855  | 2.77E-35    |
| RP11-1100L3.8 | BMP8A     | 0.508610863  | 2.94E-30    |
| RP11-1100L3.8 | MATN2     | 0.44219434   | 1.93E-22    |
| RP11-1100L3.8 | PLA2R1    | 0.500149425  | 3.64E-29    |
| RP11-1100L3.8 | COL23A1   | 0.395874865  | 6.37E-18    |
| RP11-1100L3.8 | HGD       | 0.472120135  | 9.41E-26    |
| RP11-1100L3.8 | TCEAL2    | 0.454359712  | 9.51E-24    |
| RP11-1100L3.8 | CHRDL1    | 0.425999602  | 8.81E-21    |
| RP11-1100L3.8 | TNFRSF11B | 0.421718871  | 2.34E-20    |
| RP11-1100L3.8 | FAM167A   | 0.462192527  | 1.28E-24    |
| RP11-1100L3.8 | KIT       | 0.464230018  | 7.56E-25    |
| RP11-1100L3.8 | SLC4A4    | 0.436586241  | 7.41E-22    |
| RP11-1100L3.8 | SMOC2     | 0.477634196  | 2.12E-26    |
| RP11-1100L3.8 | FHL1      | 0.555591299  | 6.37E-37    |
| RP11-1100L3.8 | OTOS      | 0.411878776  | 2.10E-19    |
| RP11-1100L3.8 | IGFBPL1   | 0.367816266  | 1.64E-15    |
| RP11-1100L3.8 | HBB       | 0.461156549  | 1.68E-24    |
| RP11-1100L3.8 | BEX1      | 0.439664391  | 3.55E-22    |
| RP11-1100L3.8 | FABP4     | 0.45472827   | 8.66E-24    |
| RP11-1100L3.8 | LMOD1     | 0.574923277  | 5.51E-40    |
| RP11-1100L3.8 | SOD3      | 0.475840382  | 3.46E-26    |
| RP11-1100L3.8 | TMEM171   | 0.418688803  | 4.63E-20    |
| RP11-1100L3.8 | PI16      | 0.451646368  | 1.88E-23    |
| RP11-1100L3.8 | ZMAT4     | 0.540460002  | 1.16E-34    |
| RP11-1100L3.8 | MFAP4     | 0.400801437  | 2.27E-18    |

|               |            |             |           |
|---------------|------------|-------------|-----------|
| RP11-1100L3.8 | CWH43      | 0.426839491 | 7.26E-21  |
| RP11-1100L3.8 | SPX        | 0.480079469 | 1.09E-26  |
| RP11-1100L3.8 | APOD       | 0.359398747 | 7.86E-15  |
| RP11-1100L3.8 | DPP6       | 0.494689121 | 1.78E-28  |
| RP11-1100L3.8 | MMRN1      | 0.354157013 | 2.03E-14  |
| RP11-1100L3.8 | WDR72      | 0.302896641 | 9.10E-11  |
| RP11-1100L3.8 | MPPED2     | 0.584860529 | 1.22E-41  |
| RP11-1100L3.8 | PAPSS2     | 0.384128905 | 6.95E-17  |
| RP11-1100L3.8 | DCN        | 0.277004694 | 3.56E-09  |
| RP11-1100L3.8 | SORBS2     | 0.510922666 | 1.46E-30  |
| RP11-1100L3.8 | EGR2       | 0.6347404   | 6.99E-51  |
| RP11-1100L3.8 | EDN3       | 0.402226085 | 1.68E-18  |
| RP11-1100L3.8 | DIO2       | 0.363379264 | 3.77E-15  |
| RP11-1100L3.8 | ITPR1      | 0.548161018 | 8.49E-36  |
| RP11-1100L3.8 | CFD        | 0.383470497 | 7.93E-17  |
| RP11-1100L3.8 | CPXM1      | 0.464063785 | 7.90E-25  |
| RP11-1100L3.8 | ELMO1      | 0.532205898 | 1.79E-33  |
| RP11-1100L3.8 | GPC3       | 0.530196085 | 3.43E-33  |
| RP11-1100L3.8 | MYOC       | 0.394159553 | 9.08E-18  |
| RP11-1100L3.8 | DEPTOR     | 0.508182373 | 3.34E-30  |
| RP11-1100L3.8 | DGKI       | 0.542179319 | 6.52E-35  |
| RP11-1100L3.8 | CARTPT     | 0.454110661 | 1.01E-23  |
| RP11-1100L3.8 | IYD        | 0.229487688 | 1.18E-06  |
| RP11-1100L3.8 | LYVE1      | 0.441152262 | 2.48E-22  |
| RP11-1100L3.8 | CLCNKB     | 0.52800837  | 6.96E-33  |
| RP11-1100L3.8 | NCAM1      | 0.254159977 | 6.70E-08  |
| RP11-1100L3.8 | HBA2       | 0.497638482 | 7.59E-29  |
| RP11-1100L3.8 | GLT8D2     | 0.495828073 | 1.28E-28  |
| RP11-1100L3.8 | OGDHL      | 0.284371858 | 1.30E-09  |
| RP11-1100L3.8 | LIFR       | 0.42243685  | 1.99E-20  |
| RP11-1100L3.8 | CSGALNACT1 | 0.362978149 | 4.06E-15  |
| RP11-1100L3.8 | RAP1GAP    | 0.302923732 | 9.07E-11  |
| RP11-1100L3.8 | COL9A3     | 0.493898379 | 2.24E-28  |
| RP11-1100L3.8 | FBLN1      | 0.315423982 | 1.35E-11  |
| RP11-1100L3.8 | EFEMP1     | 0.509104456 | 2.53E-30  |
| RP11-1100L3.8 | AOX1       | 0.440478197 | 2.92E-22  |
| RP11-1100L3.8 | GRIN2C     | 0.476907564 | 2.59E-26  |
| RP11-1100L3.8 | C11orf74   | 0.501454611 | 2.48E-29  |
| RP11-1100L3.8 | PPARGC1A   | 0.373749546 | 5.31E-16  |
| RP11-1100L3.8 | ANGPTL1    | 0.497393813 | 8.15E-29  |
| RP11-1100L3.8 | SCARA5     | 0.39807047  | 4.03E-18  |
| RP11-1100L3.8 | LTF        | 0.435881168 | 8.77E-22  |
| RP11-1100L3.8 | CA4        | 0.517229993 | 2.10E-31  |
| RP11-1100L3.8 | TG         | 0.384778803 | 6.10E-17  |
| RP11-1100L3.8 | FCGBP      | 0.53290785  | 1.42E-33  |
| RP11-1100L3.8 | PBX4       | 0.626383214 | 3.24E-49  |
| RP11-1100L3.8 | CYR61      | 0.76237554  | 1.27E-84  |
| RP11-1100L3.8 | FOS        | 0.840055918 | 3.88E-118 |
| RP11-1100L3.8 | KHDRBS2    | 0.521324719 | 5.84E-32  |
| RP11-1100L3.8 | MUM1L1     | 0.400645416 | 2.35E-18  |
| RP11-1100L3.8 | RGS16      | 0.57474598  | 5.89E-40  |

|               |          |             |             |
|---------------|----------|-------------|-------------|
| RP11-1100L3.8 | MT1M     | 0.440537966 | 2.88E-22    |
| RP11-1100L3.8 | LRP2     | 0.449275418 | 3.39E-23    |
| RP11-1100L3.8 | MAFB     | 0.552975112 | 1.60E-36    |
| RP11-1100L3.8 | KCNK2    | 0.464967146 | 6.24E-25    |
| RP11-1100L3.8 | TBC1D4   | 0.464388308 | 7.26E-25    |
| RP11-1100L3.8 | MIOX     | 0.48743048  | 1.41E-27    |
| RP11-1100L3.8 | TPPP     | 0.465144016 | 5.96E-25    |
| RP11-1100L3.8 | FMOD     | 0.392578711 | 1.26E-17    |
| RP11-1100L3.8 | CITED2   | 0.583420173 | 2.14E-41    |
| RP11-1100L3.8 | RGS8     | 0.526959635 | 9.74E-33    |
| RP11-1100L3.8 | ABI3BP   | 0.29046504  | 5.55E-10    |
| RP11-1100L3.8 | ADH1B    | 0.41252226  | 1.82E-19    |
| RP11-1100L3.8 | OGN      | 0.33819588  | 3.30E-13    |
| RP11-1100L3.8 | NR4A1    | 0.800585475 | 3.04E-99    |
| RP11-1100L3.8 | FOXJ1    | 0.589531746 | 1.94E-42    |
| RP11-1100L3.8 | ALDH1A1  | 0.411290719 | 2.38E-19    |
| RP11-1100L3.8 | OCA2     | 0.561947986 | 6.59E-38    |
| RP11-1100L3.8 | TMEM139  | 0.417619068 | 5.88E-20    |
| RP11-1100L3.8 | ARHGAP24 | 0.43804305  | 5.24E-22    |
| RP11-1100L3.8 | SLC25A15 | 0.355592972 | 1.57E-14    |
| RP11-1100L3.8 | DES      | 0.37191291  | 7.56E-16    |
| RP11-1100L3.8 | GDF10    | 0.442689728 | 1.71E-22    |
| RP11-1100L3.8 | KIAA1324 | 0.410960664 | 2.56E-19    |
| RP11-1100L3.8 | JUN      | 0.766104155 | 6.32E-86    |
| RP11-1100L3.8 | C7       | 0.203732615 | 1.69E-05    |
| RP11-1100L3.8 | LGI3     | 0.459405853 | 2.63E-24    |
| RP11-1100L3.8 | CDON     | 0.495814173 | 1.29E-28    |
| RP11-1100L3.8 | BCL2     | 0.351953573 | 3.02E-14    |
| RP11-1100L3.8 | HLF      | 0.441380336 | 2.35E-22    |
| RP11-1100L3.8 | EGR1     | 0.717115447 | 1.60E-70    |
| RP11-1100L3.8 | IP6K3    | 0.387247762 | 3.72E-17    |
| RP11-1100L3.8 | SCUBE3   | 0.398523816 | 3.66E-18    |
| RP11-1100L3.8 | PKNOX2   | 0.537925198 | 2.71E-34    |
| RP11-1100L3.8 | SMAD9    | 0.369664069 | 1.16E-15    |
| RP11-1100L3.8 | IQGAP2   | 0.402293705 | 1.66E-18    |
| RP11-1100L3.8 | GNA14    | 0.561458109 | 7.87E-38    |
| RP11-1100L3.8 | LAYN     | 0.553887692 | 1.16E-36    |
| RP11-1100L3.8 | AVPR1A   | 0.49546653  | 1.42E-28    |
| RP11-1100L3.8 | PDLIM3   | 0.452727167 | 1.43E-23    |
| RP11-1100L3.8 | GPM6A    | 0.36197224  | 4.89E-15    |
| RP11-1100L3.8 | SDPR     | 0.485902451 | 2.16E-27    |
| RP11-1100L3.8 | CRYAB    | 0.199547142 | 2.54E-05    |
| RP11-1100L3.8 | FOXA2    | 0.636261591 | 3.43E-51    |
| RP11-1100L3.8 | C8orf88  | 0.412114935 | 1.99E-19    |
| RP11-1100L3.8 | ISM1     | 0.449288609 | 3.38E-23    |
| RP11-1100L3.8 | BMP2     | 0.570411437 | 2.98E-39    |
| RP11-1100L3.8 | ID4      | 0.550271696 | 4.10E-36    |
| RP11-1100L3.8 | NUPR1    | 0.139019982 | 0.003515255 |
| RP11-1100L3.8 | SERTM1   | 0.34018593  | 2.35E-13    |
| RP11-1100L3.8 | IRS1     | 0.407584515 | 5.33E-19    |
| RP11-1100L3.8 | FIBIN    | 0.203802541 | 1.68E-05    |

|               |          |             |            |
|---------------|----------|-------------|------------|
| RP11-1100L3.8 | PODN     | 0.350477473 | 3.92E-14   |
| RP11-1100L3.8 | TDRD9    | 0.321063711 | 5.54E-12   |
| RP11-1100L3.8 | EPHA3    | 0.394582445 | 8.32E-18   |
| RP11-1100L3.8 | AIF1L    | 0.382608127 | 9.41E-17   |
| RP11-1100L3.8 | EBF4     | 0.538183767 | 2.49E-34   |
| RP11-1100L3.8 | ADM2     | 0.31389441  | 1.71E-11   |
| RP11-1100L3.8 | GSTM3    | 0.462450103 | 1.20E-24   |
| RP11-1100L3.8 | HSD17B6  | 0.368081308 | 1.56E-15   |
| RP11-1100L3.8 | AGR3     | 0.552409047 | 1.95E-36   |
| RP11-1100L3.8 | EPHB1    | 0.289491754 | 6.37E-10   |
| RP11-1100L3.8 | TMOD1    | 0.360540536 | 6.37E-15   |
| RP11-1100L3.8 | WASF3    | 0.417490989 | 6.05E-20   |
| RP11-1100L3.8 | SELV     | 0.479066176 | 1.44E-26   |
| RP11-1100L3.8 | ENPP1    | 0.134361057 | 0.00480315 |
| RP11-1100L3.8 | SYNE1    | 0.51555537  | 3.53E-31   |
| RP11-1100L3.8 | PLCH1    | 0.498081723 | 6.67E-29   |
| RP11-1100L3.8 | CCDC146  | 0.605162532 | 3.32E-45   |
| RP11-1100L3.8 | SLC16A2  | 0.489653193 | 7.52E-28   |
| RP11-1100L3.8 | IER2     | 0.795772657 | 3.12E-97   |
| RP11-1100L3.8 | KCNAB1   | 0.466185952 | 4.53E-25   |
| RP11-1100L3.8 | SYNDIG1  | 0.49213903  | 3.71E-28   |
| RP11-1100L3.8 | C16orf89 | 0.402173569 | 1.70E-18   |
| RP11-1100L3.8 | CTGF     | 0.634854154 | 6.63E-51   |
| RP11-1100L3.8 | NR4A3    | 0.554083286 | 1.08E-36   |
| RP11-1100L3.8 | KIAA1456 | 0.400355926 | 2.49E-18   |
| RP11-1100L3.8 | AQP4     | 0.304794422 | 6.85E-11   |
| RP11-1100L3.8 | RNF150   | 0.514258676 | 5.26E-31   |
| RP11-1100L3.8 | C1S      | 0.187095684 | 8.02E-05   |
| RP11-1100L3.8 | PFKFB2   | 0.218065968 | 4.00E-06   |
| RP11-1100L3.8 | PROX1    | 0.472535718 | 8.42E-26   |
| RP11-1100L3.8 | TCF7L1   | 0.586161743 | 7.33E-42   |
| RP11-1100L3.8 | HSPB6    | 0.494319777 | 1.98E-28   |
| RP11-1100L3.8 | FHDC1    | 0.256011519 | 5.34E-08   |
| RP11-1100L3.8 | PRR15L   | 0.216759648 | 4.58E-06   |
| RP11-1100L3.8 | SLC1A1   | 0.186316857 | 8.60E-05   |
| RP11-1100L3.8 | BTBD11   | 0.490337982 | 6.19E-28   |
| RP11-1100L3.8 | TRIM58   | 0.306975168 | 4.94E-11   |
| RP11-1100L3.8 | LRIG1    | 0.384728592 | 6.17E-17   |
| RP11-1100L3.8 | ROR2     | 0.41518032  | 1.01E-19   |
| RP11-1100L3.8 | GPR125   | 0.505164645 | 8.26E-30   |
| RP11-1100L3.8 | FLRT1    | 0.572013062 | 1.64E-39   |
| RP11-1100L3.8 | PGF      | 0.579050312 | 1.15E-40   |
| RP11-1100L3.8 | DUSP1    | 0.770288351 | 2.04E-87   |
| RP11-1100L3.8 | PLA2G7   | 0.41381996  | 1.37E-19   |
| RP11-1100L3.8 | PLSCR4   | 0.331443921 | 1.02E-12   |
| RP11-1100L3.8 | FAM46B   | 0.402527027 | 1.58E-18   |
| RP11-1100L3.8 | GLDC     | 0.438857337 | 4.31E-22   |
| RP11-1100L3.8 | ZBTB16   | 0.280514738 | 2.22E-09   |
| RP11-1100L3.8 | OMD      | 0.259230683 | 3.58E-08   |
| RP11-1100L3.8 | HSD11B2  | 0.483820565 | 3.87E-27   |
| RP11-1100L3.8 | FGL2     | 0.26602579  | 1.51E-08   |

|               |          |             |             |
|---------------|----------|-------------|-------------|
| RP11-1100L3.8 | CLCNKA   | 0.532419524 | 1.66E-33    |
| RP11-1100L3.8 | GATM     | 0.19531997  | 3.78E-05    |
| RP11-1100L3.8 | TNS3     | 0.379112125 | 1.87E-16    |
| RP11-1100L3.8 | TOB1     | 0.657964816 | 8.58E-56    |
| RP11-1100L3.8 | MARC2    | 0.433706805 | 1.47E-21    |
| RP11-1100L3.8 | LRRC2    | 0.326339343 | 2.37E-12    |
| RP11-1100L3.8 | SORD     | 0.250536038 | 1.04E-07    |
| RP11-1100L3.8 | RIMS4    | 0.380533191 | 1.42E-16    |
| RP11-1100L3.8 | SLC29A4  | 0.55065494  | 3.59E-36    |
| RP11-1100L3.8 | SLC39A14 | 0.295299276 | 2.78E-10    |
| RP11-1100L3.8 | FAXDC2   | 0.396131448 | 6.04E-18    |
| RP11-1100L3.8 | HSPB8    | 0.364725015 | 2.94E-15    |
| RP11-1100L3.8 | CCL19    | 0.095536752 | 0.045436788 |
| RP11-1100L3.8 | KCNIP3   | 0.495099739 | 1.58E-28    |
| RP11-1100L3.8 | CGNL1    | 0.356341163 | 1.37E-14    |
| RP11-1100L3.8 | ATF3     | 0.66326683  | 5.63E-57    |
| RP11-1100L3.8 | SGCD     | 0.329138074 | 1.50E-12    |
| RP11-1100L3.8 | STARD13  | 0.496776822 | 9.75E-29    |
| RP11-1100L3.8 | LDHD     | 0.311539204 | 2.46E-11    |
| RP11-1100L3.8 | RCAN1    | 0.579739925 | 8.83E-41    |
| RP11-1100L3.8 | ID3      | 0.494451402 | 1.91E-28    |
| RP11-1100L3.8 | SYTL3    | 0.381201812 | 1.24E-16    |
| RP11-1100L3.8 | MT1E     | 0.2940504   | 3.32E-10    |
| RP11-1100L3.8 | CAMK1D   | 0.390297119 | 2.00E-17    |
| RP11-1100L3.8 | PRKCQ    | 0.339232908 | 2.77E-13    |
| RP11-1100L3.8 | NUAK2    | 0.35364569  | 2.23E-14    |
| RP11-1100L3.8 | LIPG     | 0.401691465 | 1.88E-18    |
| RP11-1100L3.8 | SLC25A25 | 0.460308079 | 2.09E-24    |
| RP11-1100L3.8 | PRKX     | 0.273052686 | 6.04E-09    |
| RP11-1100L3.8 | SRPX     | 0.347980998 | 6.09E-14    |
| RP11-1100L3.8 | FAM189A1 | 0.504556022 | 9.90E-30    |
| RP11-1100L3.8 | PLEKHH1  | 0.464775665 | 6.56E-25    |
| RP11-1100L3.8 | WNT11    | 0.564672138 | 2.46E-38    |
| RP11-1100L3.8 | SNAI1    | 0.52793816  | 7.12E-33    |
| RP11-1100L3.8 | FDCSP    | 0.050088637 | 0.29503561  |
| RP11-1100L3.8 | MT1X     | 0.252994643 | 7.73E-08    |
| RP11-1100L3.8 | ACACB    | 0.487989585 | 1.20E-27    |
| RP11-1100L3.8 | ARC      | 0.463211202 | 9.86E-25    |
| RP11-1100L3.8 | KLK4     | 0.202401492 | 1.93E-05    |
| RP11-1100L3.8 | ZFPM2    | 0.460488354 | 1.99E-24    |
| RP11-1100L3.8 | AKAP12   | 0.326328422 | 2.37E-12    |
| RP11-1100L3.8 | GJB6     | 0.369306124 | 1.24E-15    |
| RP11-1100L3.8 | ERO1LB   | 0.459938877 | 2.30E-24    |
| RP11-1100L3.8 | DNALI1   | 0.627292532 | 2.15E-49    |
| RP11-1100L3.8 | HKDC1    | 0.310338127 | 2.96E-11    |
| RP11-1100L3.8 | ZFP36L2  | 0.454987342 | 8.12E-24    |
| RP11-1100L3.8 | CAPSL    | 0.529281235 | 4.61E-33    |
| RP11-1100L3.8 | CYP7B1   | 0.389765088 | 2.23E-17    |
| RP11-1100L3.8 | CPQ      | 0.48410353  | 3.57E-27    |
| RP11-1100L3.8 | RPS6KA6  | 0.490334737 | 6.20E-28    |
| RP11-1100L3.8 | TLE1     | 0.441504444 | 2.28E-22    |

|               |          |             |             |
|---------------|----------|-------------|-------------|
| RP11-1100L3.8 | TP53INP2 | 0.571669958 | 1.87E-39    |
| RP11-1100L3.8 | KATNAL2  | 0.524630801 | 2.05E-32    |
| RP11-1100L3.8 | SGPP2    | 0.144320294 | 0.002436582 |
| RP11-1100L3.8 | CTH      | 0.338787965 | 2.99E-13    |
| RP11-1100L3.8 | KIF12    | 0.491864859 | 4.01E-28    |
| RP11-1100L3.8 | TMEM220  | 0.37309284  | 6.03E-16    |
| RP11-1100L3.8 | CENPJ    | 0.539287543 | 1.72E-34    |
| RP11-1100L3.8 | FAM155B  | 0.363720241 | 3.54E-15    |
| RP11-1100L3.8 | WFS1     | 0.461656383 | 1.47E-24    |
| RP11-1100L3.8 | SELENBP1 | 0.426054123 | 8.70E-21    |
| RP11-1100L3.8 | SNTA1    | 0.267897331 | 1.19E-08    |
| RP11-1100L3.8 | FRAS1    | 0.265554323 | 1.61E-08    |
| RP11-1100L3.8 | FBLN7    | 0.396431292 | 5.67E-18    |
| RP11-1100L3.8 | AGPAT9   | 0.389897706 | 2.17E-17    |
| RP11-1100L3.8 | GPR83    | 0.443050043 | 1.57E-22    |
| RP11-1100L3.8 | PRTG     | 0.380218455 | 1.51E-16    |
| RP11-1100L3.8 | EGR3     | 0.602356284 | 1.07E-44    |
| RP11-1100L3.8 | GRAMD2   | 0.446669869 | 6.46E-23    |
| RP11-1100L3.8 | HYOU1    | 0.376007877 | 3.43E-16    |
| RP11-1100L3.8 | FBLN5    | 0.480642278 | 9.32E-27    |
| RP11-1100L3.8 | ITM2A    | 0.494915635 | 1.67E-28    |
| RP11-1100L3.8 | SRF      | 0.669853038 | 1.77E-58    |
| RP11-1100L3.8 | FGFR2    | 0.373590121 | 5.48E-16    |
| RP11-1100L3.8 | MT1A     | 0.406585428 | 6.61E-19    |
| RP11-1100L3.8 | MAMDC2   | 0.425325506 | 1.03E-20    |
| RP11-1100L3.8 | FHL2     | 0.426620337 | 7.64E-21    |
| RP11-1100L3.8 | FTCDNL1  | 0.209143418 | 9.94E-06    |
| RP11-1100L3.8 | PKIA     | 0.375458684 | 3.82E-16    |
| RP11-1100L3.8 | DNAJB4   | 0.517500222 | 1.93E-31    |
| RP11-1100L3.8 | SLC25A33 | 0.486862688 | 1.65E-27    |
| RP11-1100L3.8 | EYA2     | 0.249110007 | 1.24E-07    |
| RP11-1100L3.8 | LPAR1    | 0.27573128  | 4.23E-09    |
| RP11-1100L3.8 | STX11    | 0.13703951  | 0.004018658 |
| RP11-1100L3.8 | ARHGEF28 | 0.275104644 | 4.60E-09    |
| RP11-1100L3.8 | OR2W3    | 0.360189772 | 6.80E-15    |
| RP11-1100L3.8 | ALDH1B1  | 0.226438623 | 1.64E-06    |
| RP11-1100L3.8 | CXCL12   | 0.310166788 | 3.04E-11    |
| RP11-1100L3.8 | OLFM2    | 0.505973968 | 6.49E-30    |
| RP11-1100L3.8 | TUB      | 0.332342601 | 8.83E-13    |
| RP11-1100L3.8 | HTRA3    | 0.385821022 | 4.95E-17    |
| RP11-1100L3.8 | CKB      | 0.367806995 | 1.65E-15    |
| RP11-1100L3.8 | RGS2     | 0.469607348 | 1.84E-25    |
| RP11-1100L3.8 | SHANK2   | 0.483556606 | 4.16E-27    |
| RP11-1100L3.8 | CNTFR    | 0.409028857 | 3.90E-19    |
| RP11-1100L3.8 | CYTH3    | 0.39721012  | 4.82E-18    |
| RP11-1100L3.8 | PLAC9    | 0.517217541 | 2.11E-31    |
| RP11-1100L3.8 | WVOX     | 0.445253767 | 9.15E-23    |
| RP11-1100L3.8 | NPR3     | 0.518550243 | 1.39E-31    |
| RP11-1100L3.8 | SDC2     | 0.454620976 | 8.90E-24    |
| RP11-1100L3.8 | KLF15    | 0.300007844 | 1.40E-10    |
| RP11-1100L3.8 | TMEM164  | 0.442190936 | 1.93E-22    |



|               |          |             |             |
|---------------|----------|-------------|-------------|
| RP11-1100L3.8 | LONRF3   | 0.213039401 | 6.71E-06    |
| RP11-1100L3.8 | GBP1     | 0.260143236 | 3.19E-08    |
| RP11-1100L3.8 | ARHGAP6  | 0.369882498 | 1.11E-15    |
| RP11-1100L3.8 | TMEM119  | 0.282679173 | 1.65E-09    |
| RP11-1100L3.8 | SH3RF1   | 0.307196434 | 4.77E-11    |
| RP11-1100L3.8 | CRELD2   | 0.469135739 | 2.08E-25    |
| RP11-1100L3.8 | PCP4     | 0.14752936  | 0.001940141 |
| RP11-1100L3.8 | GCSH     | 0.435171131 | 1.04E-21    |
| RP11-1100L3.8 | IMPA2    | 0.390167338 | 2.06E-17    |
| RP11-1100L3.8 | C1R      | 0.171472038 | 0.00030707  |
| RP11-1100L3.8 | SUCNR1   | 0.380168244 | 1.52E-16    |
| RP11-1100L3.8 | SFRP1    | 0.434523503 | 1.21E-21    |
| RP11-1100L3.8 | UGT8     | 0.263117135 | 2.19E-08    |
| RP11-1100L3.8 | TLE4     | 0.372822215 | 6.35E-16    |
| RP11-1100L3.8 | ANTXR1   | 0.39150543  | 1.57E-17    |
| RP11-1100L3.8 | GPX3     | 0.285476486 | 1.12E-09    |
| RP11-1100L3.8 | DPY19L2  | 0.550695789 | 3.54E-36    |
| RP11-1100L3.8 | FAM46C   | 0.232834052 | 8.12E-07    |
| RP11-1100L3.8 | IL33     | 0.343949005 | 1.23E-13    |
| RP11-1100L3.8 | PEG3     | 0.435914074 | 8.70E-22    |
| RP11-1100L3.8 | FAHD2A   | 0.469253464 | 2.02E-25    |
| RP11-1100L3.8 | PTGDS    | 0.142154583 | 0.002834384 |
| RP11-1100L3.8 | CHCHD10  | 0.238752349 | 4.16E-07    |
| RP11-1100L3.8 | CD36     | 0.418563278 | 4.76E-20    |
| RP11-1100L3.8 | ANKRD37  | 0.701698032 | 2.48E-66    |
| RP11-1100L3.8 | TSPAN33  | 0.364803309 | 2.89E-15    |
| RP11-1100L3.8 | PRDM16   | 0.465194085 | 5.88E-25    |
| RP11-1100L3.8 | UST      | 0.376386724 | 3.19E-16    |
| RP11-1100L3.8 | NEXN     | 0.51171738  | 1.14E-30    |
| RP11-1100L3.8 | NUPR1L   | 0.229431319 | 1.18E-06    |
| RP11-1100L3.8 | SLC24A3  | 0.39332208  | 1.08E-17    |
| RP11-1100L3.8 | MARC1    | 0.529995508 | 3.66E-33    |
| RP11-1100L3.8 | MYH11    | 0.43577862  | 8.98E-22    |
| RP11-1100L3.8 | APOA1    | 0.476635041 | 2.79E-26    |
| RP11-1100L3.8 | TMEM178B | 0.453958313 | 1.05E-23    |
| RP11-1100L3.8 | CAPNG    | 0.452553879 | 1.50E-23    |
| RP11-1100L3.8 | PPM1L    | 0.446667884 | 6.47E-23    |
| RP11-1100L3.8 | FZD8     | 0.533696323 | 1.10E-33    |
| RP11-1100L3.8 | RCAN2    | 0.507349363 | 4.29E-30    |
| RP11-1100L3.8 | COPZ2    | 0.401405379 | 2.00E-18    |
| RP11-1100L3.8 | GAS1     | 0.299851681 | 1.43E-10    |
| RP11-1100L3.8 | DACT1    | 0.389522405 | 2.35E-17    |
| RP11-1100L3.8 | WBSCR17  | 0.46246216  | 1.20E-24    |
| RP11-1100L3.8 | NCS1     | 0.403019628 | 1.42E-18    |
| RP11-1100L3.8 | SPIRE2   | 0.487001122 | 1.59E-27    |
| RP11-1100L3.8 | C15orf52 | 0.342717705 | 1.52E-13    |
| RP11-1100L3.8 | SPAG5    | 0.436749353 | 7.13E-22    |
| RP11-1100L3.8 | ARL4D    | 0.360685351 | 6.20E-15    |
| RP11-1100L3.8 | FAM189A2 | 0.494307721 | 1.99E-28    |
| RP11-1100L3.8 | MAP1LC3A | 0.51975827  | 9.54E-32    |
| RP11-1100L3.8 | KLF6     | 0.426587998 | 7.70E-21    |

|               |          |              |             |
|---------------|----------|--------------|-------------|
| RP11-1100L3.8 | ADD3     | 0.27425277   | 5.15E-09    |
| RP11-1100L3.8 | TSPAN7   | 0.433619859  | 1.50E-21    |
| RP11-1100L3.8 | KLF9     | 0.40742282   | 5.52E-19    |
| RP11-1100L3.8 | KCNQ1    | 0.325541651  | 2.69E-12    |
| RP11-1100L3.8 | MAN1A1   | 0.253366398  | 7.39E-08    |
| RP11-1100L3.8 | MLF1     | 0.38839253   | 2.95E-17    |
| RP11-1100L3.8 | RARB     | 0.51497084   | 4.22E-31    |
| RP11-1100L3.8 | CDC42EP2 | 0.407423246  | 5.52E-19    |
| RP11-1100L3.8 | FAM3B    | 0.255440909  | 5.73E-08    |
| RP11-1100L3.8 | GADD45B  | 0.353446976  | 2.31E-14    |
| RP11-1100L3.8 | TMEM47   | 0.497296797  | 8.38E-29    |
| RP11-1100L3.8 | SDF2L1   | 0.385880878  | 4.90E-17    |
| RP11-1100L3.8 | CCDC85A  | 0.315333348  | 1.37E-11    |
| RP11-1100L3.8 | CRYBG3   | 0.133677969  | 0.00502416  |
| RP11-1100L3.8 | FBLN2    | 0.24815984   | 1.38E-07    |
| RP11-1100L3.8 | PEBP4    | 0.099720595  | 0.036741042 |
| RP11-1100L3.8 | CDADC1   | 0.512972639  | 7.80E-31    |
| RP11-1100L3.8 | FAM63A   | 0.325219255  | 2.84E-12    |
| RP11-1100L3.8 | GLUL     | 0.357787193  | 1.05E-14    |
| RP11-1100L3.8 | FREM2    | 0.245383945  | 1.92E-07    |
| RP11-1100L3.8 | ACKR3    | 0.555722498  | 6.08E-37    |
| RP11-1100L3.8 | DENND6A  | 0.497653233  | 7.55E-29    |
| RP11-1100L3.8 | CLDN8    | 0.148542077  | 0.001803858 |
| RP11-1100L3.8 | UTS2R    | 0.272793656  | 6.25E-09    |
| RP11-1100L3.8 | SCNN1B   | 0.359694052  | 7.44E-15    |
| RP11-1100L3.8 | TTC30A   | 0.394529823  | 8.41E-18    |
| RP11-1100L3.8 | CORO2B   | 0.528617418  | 5.72E-33    |
| RP11-1100L3.8 | TC2N     | 0.233551039  | 7.49E-07    |
| RP11-1100L3.8 | ALDH2    | 0.363465927  | 3.71E-15    |
| RP11-1100L3.8 | GPR183   | 0.325791001  | 2.59E-12    |
| RP11-1100L3.8 | C4orf47  | 0.55830209   | 2.44E-37    |
| RP11-1100L3.8 | SLC25A42 | 0.498424828  | 6.03E-29    |
| RP11-1100L3.8 | LGMN     | 0.351303675  | 3.39E-14    |
| RP11-1100L3.8 | ACSF2    | 0.392531196  | 1.27E-17    |
| RP11-1100L3.8 | KIAA1467 | 0.377177466  | 2.74E-16    |
| RP11-1100L3.8 | PRKG1    | 0.524345283  | 2.25E-32    |
| RP11-1100L3.8 | GNAI1    | 0.42595895   | 8.90E-21    |
| RP11-1100L3.8 | ABCC4    | 0.299797074  | 1.44E-10    |
| RP11-1100L3.8 | PRPS1    | 0.302950964  | 9.03E-11    |
| RP11-1100L3.8 | TSPAN5   | 0.312909918  | 1.99E-11    |
| RP11-1100L3.8 | CR2      | 0.095955258  | 0.044495527 |
| RP11-1100L3.8 | CCDC170  | 0.392714024  | 1.22E-17    |
| RP11-1100L3.8 | RRAD     | 0.374242997  | 4.83E-16    |
| RP11-1100L3.8 | SCGB2A1  | 0.319937665  | 6.62E-12    |
| RP11-1100L3.8 | SESN3    | 0.325444918  | 2.74E-12    |
| RP11-1100L3.8 | SGK223   | 0.262543971  | 2.36E-08    |
| RP11-1100L3.8 | NDRG2    | 0.488288152  | 1.11E-27    |
| RP11-1100L3.8 | C3orf52  | 0.395665939  | 6.65E-18    |
| RP11-1100L3.8 | FLRT3    | -0.100890042 | 0.034579471 |
| RP11-1100L3.8 | MST1R    | -0.333921532 | 6.78E-13    |
| RP11-1100L3.8 | SDC1     | -0.341044594 | 2.03E-13    |

|               |          |              |             |
|---------------|----------|--------------|-------------|
| RP11-1100L3.8 | ST8SIA4  | -0.389153486 | 2.53E-17    |
| RP11-1100L3.8 | UBTD1    | -0.24343723  | 2.42E-07    |
| RP11-1100L3.8 | EPHA2    | -0.039268041 | 0.411801424 |
| RP11-1100L3.8 | TMEM130  | -0.013941599 | 0.770829334 |
| RP11-1100L3.8 | SPINK2   | -0.387040396 | 3.88E-17    |
| RP11-1100L3.8 | MMP16    | -0.323101059 | 4.00E-12    |
| RP11-1100L3.8 | SIGLEC15 | -0.260628319 | 3.00E-08    |
| RP11-1100L3.8 | RIN1     | -0.271776719 | 7.15E-09    |
| RP11-1100L3.8 | IL1RN    | -0.394042755 | 9.30E-18    |
| RP11-1100L3.8 | FCER1G   | -0.218004836 | 4.02E-06    |
| RP11-1100L3.8 | CD276    | -0.315279308 | 1.38E-11    |
| RP11-1100L3.8 | CTSB     | -0.507854729 | 3.69E-30    |
| RP11-1100L3.8 | FAM171A2 | -0.109016035 | 0.022345711 |
| RP11-1100L3.8 | ASPHD1   | -0.408700064 | 4.19E-19    |
| RP11-1100L3.8 | C15orf48 | -0.386716298 | 4.14E-17    |
| RP11-1100L3.8 | DYSF     | -0.088070801 | 0.065239874 |
| RP11-1100L3.8 | PDZRN4   | 0.00775679   | 0.871257134 |
| RP11-1100L3.8 | EFHD2    | -0.072904296 | 0.1272118   |
| RP11-1100L3.8 | ASF1B    | -0.387313575 | 3.67E-17    |
| RP11-1100L3.8 | AQP1     | -0.033682068 | 0.48149171  |
| RP11-1100L3.8 | ARRDC2   | -0.181636089 | 0.000129859 |
| RP11-1100L3.8 | PRSS1    | -0.31819478  | 8.72E-12    |
| RP11-1100L3.8 | MAPK13   | -0.451754306 | 1.83E-23    |
| RP11-1100L3.8 | CST5     | -0.266511578 | 1.42E-08    |
| RP11-1100L3.8 | AHR      | -0.26359158  | 2.06E-08    |
| RP11-1100L3.8 | BAX      | -0.237950828 | 4.56E-07    |
| RP11-1100L3.8 | C1orf115 | -0.246999896 | 1.59E-07    |
| RP11-1100L3.8 | PLK3     | 0.020541282  | 0.667773424 |
| RP11-1100L3.8 | JAG2     | -0.060860336 | 0.203120959 |
| RP11-1100L3.8 | RAD23B   | -0.48290685  | 4.98E-27    |
| RP11-1100L3.8 | CA12     | 0.109287936  | 0.02201137  |
| RP11-1100L3.8 | ADTRP    | -0.253874317 | 6.94E-08    |
| RP11-1100L3.8 | UCP2     | -0.233596853 | 7.46E-07    |
| RP11-1100L3.8 | IGFBP2   | -0.035892459 | 0.453177544 |
| RP11-1100L3.8 | LOXL2    | -0.137458922 | 0.003906906 |
| RP11-1100L3.8 | GPX1     | -0.284402211 | 1.30E-09    |
| RP11-1100L3.8 | P3H3     | -0.233213183 | 7.78E-07    |
| RP11-1100L3.8 | C2orf81  | -0.219311157 | 3.51E-06    |
| RP11-1100L3.8 | CDT1     | -0.450494508 | 2.51E-23    |
| RP11-1100L3.8 | SNX25    | -0.131575659 | 0.005763015 |
| RP11-1100L3.8 | MTHFD1L  | -0.361475101 | 5.36E-15    |
| RP11-1100L3.8 | CDC42BPG | -0.355644755 | 1.55E-14    |
| RP11-1100L3.8 | MSN      | -0.504040444 | 1.15E-29    |
| RP11-1100L3.8 | SIGLEC6  | -0.286923726 | 9.14E-10    |
| RP11-1100L3.8 | F2R      | -0.011975453 | 0.80242713  |
| RP11-1100L3.8 | TMEM184A | -0.326634223 | 2.26E-12    |
| RP11-1100L3.8 | CKS2     | -0.206977707 | 1.23E-05    |
| RP11-1100L3.8 | TAX1BP3  | -0.283919681 | 1.39E-09    |
| RP11-1100L3.8 | PMEPA1   | -0.201753277 | 2.05E-05    |
| RP11-1100L3.8 | CXCL16   | -0.390326763 | 1.99E-17    |
| RP11-1100L3.8 | FAXC     | -0.31429283  | 1.61E-11    |

|               |          |              |             |
|---------------|----------|--------------|-------------|
| RP11-1100L3.8 | VTCN1    | -0.330772269 | 1.14E-12    |
| RP11-1100L3.8 | SH2D4A   | -0.381827314 | 1.10E-16    |
| RP11-1100L3.8 | RNF24    | -0.328955104 | 1.54E-12    |
| RP11-1100L3.8 | LY6G6C   | -0.329818158 | 1.34E-12    |
| RP11-1100L3.8 | NID1     | -0.159533322 | 0.000794875 |
| RP11-1100L3.8 | STAC     | -0.445297595 | 9.05E-23    |
| RP11-1100L3.8 | RAB34    | -0.294423857 | 3.15E-10    |
| RP11-1100L3.8 | HES4     | -0.026857148 | 0.57464988  |
| RP11-1100L3.8 | EPHA10   | -0.472883361 | 7.67E-26    |
| RP11-1100L3.8 | ENTPD2   | -0.262145976 | 2.48E-08    |
| RP11-1100L3.8 | DDB2     | -0.356801567 | 1.26E-14    |
| RP11-1100L3.8 | NKAIN4   | -0.000645217 | 0.989244635 |
| RP11-1100L3.8 | TRIM29   | -0.194940272 | 3.92E-05    |
| RP11-1100L3.8 | ADCY8    | -0.447365122 | 5.45E-23    |
| RP11-1100L3.8 | SFTA2    | -0.309166268 | 3.54E-11    |
| RP11-1100L3.8 | NRIP1    | -0.365793191 | 2.40E-15    |
| RP11-1100L3.8 | VWA1     | 0.073328247  | 0.125009287 |
| RP11-1100L3.8 | APLNR    | -0.021696971 | 0.650290057 |
| RP11-1100L3.8 | REN      | -0.375136554 | 4.06E-16    |
| RP11-1100L3.8 | EDIL3    | -0.105670663 | 0.026833212 |
| RP11-1100L3.8 | AGRN     | -0.213608452 | 6.33E-06    |
| RP11-1100L3.8 | TREM1    | -0.230075178 | 1.10E-06    |
| RP11-1100L3.8 | SRL      | -0.217415645 | 4.28E-06    |
| RP11-1100L3.8 | RASGRF1  | -0.233763795 | 7.32E-07    |
| RP11-1100L3.8 | RMI2     | -0.39285501  | 1.19E-17    |
| RP11-1100L3.8 | SAMD1    | -0.294002033 | 3.35E-10    |
| RP11-1100L3.8 | MGAT4B   | -0.45675903  | 5.18E-24    |
| RP11-1100L3.8 | NXN      | -0.282818457 | 1.62E-09    |
| RP11-1100L3.8 | SH3BGRL3 | -0.375800653 | 3.57E-16    |
| RP11-1100L3.8 | CA11     | -0.2524246   | 8.28E-08    |
| RP11-1100L3.8 | PLD3     | -0.164081472 | 0.000557465 |
| RP11-1100L3.8 | LURAP1L  | -0.399035706 | 3.29E-18    |
| RP11-1100L3.8 | CARNS1   | -0.167827533 | 0.000413318 |
| RP11-1100L3.8 | PDLIM7   | -0.140359917 | 0.003207858 |
| RP11-1100L3.8 | BCL2L1   | -0.375018137 | 4.16E-16    |
| RP11-1100L3.8 | GGT6     | -0.201361807 | 2.13E-05    |
| RP11-1100L3.8 | DPYSL3   | -0.109168935 | 0.022157161 |
| RP11-1100L3.8 | FYN      | -0.301416003 | 1.13E-10    |
| RP11-1100L3.8 | TK1      | -0.364923304 | 2.83E-15    |
| RP11-1100L3.8 | AK1      | -0.224077594 | 2.12E-06    |
| RP11-1100L3.8 | HIGD1B   | 0.014852052  | 0.756321475 |
| RP11-1100L3.8 | TMEM59L  | -0.057103212 | 0.232474679 |
| RP11-1100L3.8 | MEGF9    | -0.362936307 | 4.09E-15    |
| RP11-1100L3.8 | ZFP36L1  | -0.125133699 | 0.008672766 |
| RP11-1100L3.8 | ADRA1B   | -0.19109691  | 5.58E-05    |
| RP11-1100L3.8 | EPHA4    | -0.250476325 | 1.05E-07    |
| RP11-1100L3.8 | TCERG1L  | -0.036549306 | 0.444947758 |
| RP11-1100L3.8 | NGFR     | -0.139151323 | 0.003483984 |
| RP11-1100L3.8 | EBI3     | -0.38635433  | 4.45E-17    |
| RP11-1100L3.8 | S100A10  | -0.167302168 | 0.000431194 |
| RP11-1100L3.8 | S100B    | -0.266301663 | 1.46E-08    |

|               |          |              |             |
|---------------|----------|--------------|-------------|
| RP11-1100L3.8 | CD44     | -0.215151924 | 5.40E-06    |
| RP11-1100L3.8 | BHLHE41  | -0.364901177 | 2.84E-15    |
| RP11-1100L3.8 | FBXO2    | -0.204989859 | 1.50E-05    |
| RP11-1100L3.8 | SLC30A2  | -0.379681459 | 1.68E-16    |
| RP11-1100L3.8 | FRMD5    | -0.484157712 | 3.52E-27    |
| RP11-1100L3.8 | SAMD11   | -0.163564759 | 0.000580664 |
| RP11-1100L3.8 | SIPA1L2  | -0.19701152  | 3.23E-05    |
| RP11-1100L3.8 | S100A16  | -0.341670379 | 1.82E-13    |
| RP11-1100L3.8 | PPL      | -0.414729278 | 1.12E-19    |
| RP11-1100L3.8 | ARHGDIB  | -0.006685494 | 0.888913743 |
| RP11-1100L3.8 | CDC42EP3 | -0.372460955 | 6.80E-16    |
| RP11-1100L3.8 | RUNX2    | -0.271053491 | 7.86E-09    |
| RP11-1100L3.8 | LAMC2    | -0.404354315 | 1.07E-18    |
| RP11-1100L3.8 | BRINP1   | -0.356825821 | 1.26E-14    |
| RP11-1100L3.8 | GPRC5B   | -0.437675976 | 5.72E-22    |
| RP11-1100L3.8 | AQP5     | 0.113446318  | 0.017413033 |
| RP11-1100L3.8 | PLAG1    | -0.23504118  | 6.34E-07    |
| RP11-1100L3.8 | PTPRU    | -0.264444544 | 1.85E-08    |
| RP11-1100L3.8 | ANGPTL4  | -0.264173964 | 1.92E-08    |
| RP11-1100L3.8 | PALM3    | -0.203140303 | 1.80E-05    |
| RP11-1100L3.8 | ACP5     | -0.262002721 | 2.53E-08    |
| RP11-1100L3.8 | DLG4     | -0.208198783 | 1.09E-05    |
| RP11-1100L3.8 | ETNK2    | -0.312563268 | 2.10E-11    |
| RP11-1100L3.8 | CD109    | -0.217555496 | 4.21E-06    |
| RP11-1100L3.8 | SNX22    | -0.133851294 | 0.004967231 |
| RP11-1100L3.8 | TMEM98   | -0.304039565 | 7.67E-11    |
| RP11-1100L3.8 | CTHRC1   | -0.159497295 | 0.000797083 |
| RP11-1100L3.8 | S100A2   | -0.230837411 | 1.01E-06    |
| RP11-1100L3.8 | C11orf80 | -0.437180255 | 6.44E-22    |
| RP11-1100L3.8 | SREBF1   | -0.249526725 | 1.18E-07    |
| RP11-1100L3.8 | PRSS22   | -0.298733011 | 1.68E-10    |
| RP11-1100L3.8 | CMTM3    | -0.274962665 | 4.69E-09    |
| RP11-1100L3.8 | RDH5     | -0.32257229  | 4.35E-12    |
| RP11-1100L3.8 | MYH10    | -0.358416241 | 9.40E-15    |
| RP11-1100L3.8 | EVPL     | -0.291962557 | 4.48E-10    |
| RP11-1100L3.8 | SCD      | -0.347099196 | 7.11E-14    |
| RP11-1100L3.8 | CD151    | -0.169420506 | 0.000363246 |
| RP11-1100L3.8 | S100A4   | -0.190427297 | 5.94E-05    |
| RP11-1100L3.8 | BNIP1    | -0.183842649 | 0.000107056 |
| RP11-1100L3.8 | MAP3K6   | -0.36375031  | 3.52E-15    |
| RP11-1100L3.8 | MANEAL   | -0.449049046 | 3.59E-23    |
| RP11-1100L3.8 | CD207    | -0.235336085 | 6.13E-07    |
| RP11-1100L3.8 | CD1A     | -0.277648451 | 3.27E-09    |
| RP11-1100L3.8 | C3       | -0.192863492 | 4.75E-05    |
| RP11-1100L3.8 | NT5E     | -0.245899523 | 1.81E-07    |
| RP11-1100L3.8 | CACNG4   | -0.27706659  | 3.53E-09    |
| RP11-1100L3.8 | FHOD1    | -0.265230651 | 1.67E-08    |
| RP11-1100L3.8 | LEMD1    | -0.390032735 | 2.12E-17    |
| RP11-1100L3.8 | ATP11A   | -0.165345241 | 0.000504301 |
| RP11-1100L3.8 | PPAP2C   | -0.124664076 | 0.008928943 |
| RP11-1100L3.8 | DRAM1    | -0.293531134 | 3.58E-10    |

|               |          |              |             |
|---------------|----------|--------------|-------------|
| RP11-1100L3.8 | CDA      | -0.073166127 | 0.125848008 |
| RP11-1100L3.8 | CCND2    | -0.185930634 | 8.90E-05    |
| RP11-1100L3.8 | LCN6     | -0.047091142 | 0.324917854 |
| RP11-1100L3.8 | CDH4     | -0.377699711 | 2.47E-16    |
| RP11-1100L3.8 | MMP11    | -0.259584255 | 3.42E-08    |
| RP11-1100L3.8 | B3GAT1   | -0.252356092 | 8.35E-08    |
| RP11-1100L3.8 | SPP1     | -0.24505077  | 2.00E-07    |
| RP11-1100L3.8 | HLA-DQB1 | -0.34097637  | 2.06E-13    |
| RP11-1100L3.8 | SDC3     | -0.258512818 | 3.91E-08    |
| RP11-1100L3.8 | CX3CL1   | -0.165177022 | 0.000511095 |
| RP11-1100L3.8 | SDK1     | -0.130884345 | 0.006026499 |
| RP11-1100L3.8 | DOCK9    | -0.388684289 | 2.78E-17    |
| RP11-1100L3.8 | CSF2     | -0.259675938 | 3.38E-08    |
| RP11-1100L3.8 | GRHL3    | -0.373172269 | 5.94E-16    |
| RP11-1100L3.8 | TMEM92   | -0.407925097 | 4.95E-19    |
| RP11-1100L3.8 | BASP1    | -0.271819554 | 7.11E-09    |
| RP11-1100L3.8 | HRH1     | -0.30603422  | 5.69E-11    |
| RP11-1100L3.8 | ESM1     | 0.050792026  | 0.288298141 |
| RP11-1100L3.8 | B4GALNT3 | -0.359375911 | 7.89E-15    |
| RP11-1100L3.8 | LMO3     | -0.199161771 | 2.63E-05    |
| RP11-1100L3.8 | C9orf16  | -0.378797956 | 1.99E-16    |
| RP11-1100L3.8 | SEMA3F   | -0.031558766 | 0.509569207 |
| RP11-1100L3.8 | PLA2G12B | -0.269950551 | 9.08E-09    |
| RP11-1100L3.8 | KLK6     | -0.233719923 | 7.35E-07    |
| RP11-1100L3.8 | ST3GAL5  | -0.195161254 | 3.84E-05    |
| RP11-1100L3.8 | FAM132B  | -0.150350075 | 0.001582146 |
| RP11-1100L3.8 | CDKN1A   | -0.034772512 | 0.467405091 |
| RP11-1100L3.8 | E2F1     | -0.397448548 | 4.59E-18    |
| RP11-1100L3.8 | B3GNT8   | -0.260946885 | 2.89E-08    |
| RP11-1100L3.8 | MTMR11   | -0.334719791 | 5.94E-13    |
| RP11-1100L3.8 | MYO1G    | -0.201349751 | 2.13E-05    |
| RP11-1100L3.8 | TMSB10   | -0.264593376 | 1.82E-08    |
| RP11-1100L3.8 | UNC5CL   | -0.376054258 | 3.40E-16    |
| RP11-1100L3.8 | ABR      | -0.405165624 | 8.97E-19    |
| RP11-1100L3.8 | PLP2     | -0.368470509 | 1.45E-15    |
| RP11-1100L3.8 | SRCIN1   | -0.476939478 | 2.56E-26    |
| RP11-1100L3.8 | PDE9A    | -0.375507334 | 3.78E-16    |
| RP11-1100L3.8 | TREM2    | -0.224137733 | 2.10E-06    |
| RP11-1100L3.8 | KDEL3    | -0.281538803 | 1.93E-09    |
| RP11-1100L3.8 | PC       | -0.416187647 | 8.09E-20    |
| RP11-1100L3.8 | C2CD4A   | -0.491725008 | 4.17E-28    |
| RP11-1100L3.8 | PELI1    | -0.134866281 | 0.004645369 |
| RP11-1100L3.8 | SSX1     | -0.09535967  | 0.045840069 |
| RP11-1100L3.8 | MROH6    | -0.276845553 | 3.64E-09    |
| RP11-1100L3.8 | ESPN     | -0.27416015  | 5.21E-09    |
| RP11-1100L3.8 | BMP1     | -0.155996187 | 0.001040791 |
| RP11-1100L3.8 | TM4SF4   | -0.243687037 | 2.35E-07    |
| RP11-1100L3.8 | CORO2A   | -0.435717063 | 9.11E-22    |
| RP11-1100L3.8 | CD164L2  | -0.365589242 | 2.50E-15    |
| RP11-1100L3.8 | CTSS     | -0.387877377 | 3.28E-17    |
| RP11-1100L3.8 | CLU      | -0.228227749 | 1.35E-06    |

|               |          |              |             |
|---------------|----------|--------------|-------------|
| RP11-1100L3.8 | TMSB4X   | -0.228017121 | 1.38E-06    |
| RP11-1100L3.8 | WNT10A   | -0.227701329 | 1.43E-06    |
| RP11-1100L3.8 | NAPSA    | -0.117364995 | 0.013871734 |
| RP11-1100L3.8 | PLEKHA4  | -0.299271425 | 1.56E-10    |
| RP11-1100L3.8 | SFTPA1   | 0.028197292  | 0.555705919 |
| RP11-1100L3.8 | C1orf116 | -0.297186419 | 2.11E-10    |
| RP11-1100L3.8 | TM4SF1   | -0.144121439 | 0.002470861 |
| RP11-1100L3.8 | SEL1L3   | -0.325683914 | 2.63E-12    |
| RP11-1100L3.8 | VASN     | -0.346757511 | 7.55E-14    |
| RP11-1100L3.8 | NPTXR    | -0.51425045  | 5.27E-31    |
| RP11-1100L3.8 | PDE4C    | -0.313613005 | 1.79E-11    |
| RP11-1100L3.8 | CDC42EP1 | -0.274373899 | 5.07E-09    |
| RP11-1100L3.8 | ENDOD1   | -0.455074288 | 7.94E-24    |
| RP11-1100L3.8 | RYR1     | -0.272388888 | 6.59E-09    |
| RP11-1100L3.8 | IL1RAP   | -0.305715938 | 5.97E-11    |
| RP11-1100L3.8 | SLC35F2  | -0.463273981 | 9.70E-25    |
| RP11-1100L3.8 | ISYNA1   | -0.125955362 | 0.008240261 |
| RP11-1100L3.8 | HLA-G    | -0.322687037 | 4.27E-12    |
| RP11-1100L3.8 | CDKN2B   | -0.317341336 | 9.98E-12    |
| RP11-1100L3.8 | ALDH1A3  | -0.210398819 | 8.76E-06    |
| RP11-1100L3.8 | CLIP3    | -0.209911609 | 9.20E-06    |
| RP11-1100L3.8 | ULBP2    | -0.304070485 | 7.64E-11    |
| RP11-1100L3.8 | ETHE1    | -0.477157056 | 2.42E-26    |
| RP11-1100L3.8 | XPR1     | -0.28415428  | 1.34E-09    |
| RP11-1100L3.8 | SPTBN2   | -0.522581396 | 3.93E-32    |
| RP11-1100L3.8 | IVL      | -0.355753737 | 1.52E-14    |
| RP11-1100L3.8 | MARCO    | -0.273947111 | 5.36E-09    |
| RP11-1100L3.8 | PLXND1   | -0.077696689 | 0.104004256 |
| RP11-1100L3.8 | EMILIN2  | -0.30836886  | 4.00E-11    |
| RP11-1100L3.8 | PLAUR    | -0.211540608 | 7.81E-06    |
| RP11-1100L3.8 | CDC42EP5 | -0.236745212 | 5.23E-07    |
| RP11-1100L3.8 | TRPC5    | -0.228286229 | 1.34E-06    |
| RP11-1100L3.8 | TMEM100  | -0.138554189 | 0.003628216 |
| RP11-1100L3.8 | QSOX1    | -0.343684183 | 1.29E-13    |
| RP11-1100L3.8 | ARHGAP23 | -0.200763538 | 2.26E-05    |
| RP11-1100L3.8 | MDF1     | -0.028792658 | 0.547388542 |
| RP11-1100L3.8 | FSTL3    | -0.253539156 | 7.23E-08    |
| RP11-1100L3.8 | INF2     | -0.352857217 | 2.57E-14    |
| RP11-1100L3.8 | TGFBR1   | -0.432676074 | 1.87E-21    |
| RP11-1100L3.8 | TGFBI    | -0.211425862 | 7.90E-06    |
| RP11-1100L3.8 | ERBB3    | -0.474506687 | 4.96E-26    |
| RP11-1100L3.8 | CCL18    | -0.106472894 | 0.025691785 |
| RP11-1100L3.8 | CCL17    | -0.219776107 | 3.34E-06    |
| RP11-1100L3.8 | C16orf45 | -0.198600238 | 2.78E-05    |
| RP11-1100L3.8 | PRDM1    | -0.068692583 | 0.15075675  |
| RP11-1100L3.8 | TRIM47   | -0.413000141 | 1.64E-19    |
| RP11-1100L3.8 | CNFN     | -0.352209305 | 2.88E-14    |
| RP11-1100L3.8 | ARMCX3   | -0.309311652 | 3.46E-11    |
| RP11-1100L3.8 | RAMP1    | -0.156856429 | 0.000975248 |
| RP11-1100L3.8 | GABRD    | 0.031905416  | 0.504927669 |
| RP11-1100L3.8 | COL13A1  | -0.159581972 | 0.000791903 |

|               |           |              |             |
|---------------|-----------|--------------|-------------|
| RP11-1100L3.8 | S100A5    | -0.32082897  | 5.75E-12    |
| RP11-1100L3.8 | MISP      | -0.262583828 | 2.35E-08    |
| RP11-1100L3.8 | HES6      | -0.185430516 | 9.30E-05    |
| RP11-1100L3.8 | PSD3      | -0.440998085 | 2.57E-22    |
| RP11-1100L3.8 | DOK7      | -0.2841018   | 1.35E-09    |
| RP11-1100L3.8 | ZMAT3     | -0.382635927 | 9.35E-17    |
| RP11-1100L3.8 | MFAP2     | -0.131457083 | 0.00580746  |
| RP11-1100L3.8 | TMEM79    | -0.417638641 | 5.86E-20    |
| RP11-1100L3.8 | SLC1A5    | -0.328043375 | 1.79E-12    |
| RP11-1100L3.8 | BBC3      | -0.319960076 | 6.60E-12    |
| RP11-1100L3.8 | HLA-DQB2  | -0.324595739 | 3.14E-12    |
| RP11-1100L3.8 | C1QL1     | -0.22753686  | 1.46E-06    |
| RP11-1100L3.8 | TMEM215   | -0.172487833 | 0.00028236  |
| RP11-1100L3.8 | PNP       | -0.297968509 | 1.88E-10    |
| RP11-1100L3.8 | ARNTL     | -0.292007519 | 4.45E-10    |
| RP11-1100L3.8 | CLDN2     | -0.253109753 | 7.62E-08    |
| RP11-1100L3.8 | MVP       | -0.426661753 | 7.57E-21    |
| RP11-1100L3.8 | LGALS1    | -0.19037042  | 5.97E-05    |
| RP11-1100L3.8 | BIRC7     | -0.253184743 | 7.55E-08    |
| RP11-1100L3.8 | COL8A1    | -0.417238802 | 6.40E-20    |
| RP11-1100L3.8 | PERP      | -0.43437429  | 1.25E-21    |
| RP11-1100L3.8 | GJA4      | -0.037241046 | 0.436373369 |
| RP11-1100L3.8 | IGFL2     | -0.261019541 | 2.86E-08    |
| RP11-1100L3.8 | DAPK2     | -0.306783972 | 5.08E-11    |
| RP11-1100L3.8 | MAMLD1    | -0.377104987 | 2.77E-16    |
| RP11-1100L3.8 | ETV5      | -0.266413714 | 1.44E-08    |
| RP11-1100L3.8 | RUNX1     | -0.363213031 | 3.89E-15    |
| RP11-1100L3.8 | LONRF2    | -0.232285852 | 8.63E-07    |
| RP11-1100L3.8 | SPOCK1    | -0.014875455 | 0.755949653 |
| RP11-1100L3.8 | XKRX      | -0.249784301 | 1.14E-07    |
| RP11-1100L3.8 | TGFB1     | -0.126506399 | 0.007961087 |
| RP11-1100L3.8 | ERP27     | -0.130265084 | 0.006271651 |
| RP11-1100L3.8 | TNFRSF10C | -0.30476648  | 6.88E-11    |
| RP11-1100L3.8 | PALM      | -0.281343777 | 1.98E-09    |
| RP11-1100L3.8 | TSC22D1   | -0.139968021 | 0.003295136 |
| RP11-1100L3.8 | TGM2      | -0.363194876 | 3.90E-15    |
| RP11-1100L3.8 | UBE2QL1   | -0.278711279 | 2.83E-09    |
| RP11-1100L3.8 | ECE1      | -0.311509702 | 2.47E-11    |
| RP11-1100L3.8 | COL8A2    | -0.242774851 | 2.61E-07    |
| RP11-1100L3.8 | HIST3H2A  | -0.339474882 | 2.66E-13    |
| RP11-1100L3.8 | TNFRSF21  | -0.281625181 | 1.90E-09    |
| RP11-1100L3.8 | SOX4      | -0.276852787 | 3.64E-09    |
| RP11-1100L3.8 | ELF3      | -0.312717303 | 2.05E-11    |
| RP11-1100L3.8 | TPD52L1   | -0.428872569 | 4.54E-21    |
| RP11-1100L3.8 | INHBB     | -0.169661204 | 0.000356191 |
| RP11-1100L3.8 | HPN       | -0.293919909 | 3.39E-10    |
| RP11-1100L3.8 | MMP7      | -0.260316652 | 3.12E-08    |
| RP11-1100L3.8 | RAB27A    | -0.40762891  | 5.28E-19    |
| RP11-1100L3.8 | IGF2BP2   | -0.354946195 | 1.76E-14    |
| RP11-1100L3.8 | ITGB4     | -0.246828699 | 1.62E-07    |
| RP11-1100L3.8 | PPP1R1B   | -0.267300906 | 1.28E-08    |



|               |            |              |             |
|---------------|------------|--------------|-------------|
| RP11-1100L3.8 | NPDC1      | -0.135457884 | 0.004466567 |
| RP11-1100L3.8 | CCL13      | -0.313891755 | 1.71E-11    |
| RP11-1100L3.8 | SPINT1     | -0.518010978 | 1.65E-31    |
| RP11-1100L3.8 | HEY2       | -0.202001209 | 2.00E-05    |
| RP11-1100L3.8 | CST2       | -0.292325462 | 4.26E-10    |
| RP11-1100L3.8 | ADM        | -0.371666384 | 7.92E-16    |
| RP11-1100L3.8 | VSTM2L     | -0.286775147 | 9.33E-10    |
| RP11-1100L3.8 | FAM84A     | -0.280407084 | 2.25E-09    |
| RP11-1100L3.8 | P4HA2      | -0.43716522  | 6.46E-22    |
| RP11-1100L3.8 | LPL        | -0.130342101 | 0.006240682 |
| RP11-1100L3.8 | TMEM173    | -0.200316042 | 2.36E-05    |
| RP11-1100L3.8 | DHRS3      | -0.319530025 | 7.06E-12    |
| RP11-1100L3.8 | SCN1B      | -0.37155802  | 8.09E-16    |
| RP11-1100L3.8 | GLT1D1     | -0.232844123 | 8.11E-07    |
| RP11-1100L3.8 | PHYHIP     | -0.300433639 | 1.31E-10    |
| RP11-1100L3.8 | BHLHE40    | -0.266431444 | 1.43E-08    |
| RP11-1100L3.8 | BID        | -0.353196917 | 2.41E-14    |
| RP11-1100L3.8 | POSTN      | -0.255000079 | 6.05E-08    |
| RP11-1100L3.8 | ITGA3      | -0.526165479 | 1.26E-32    |
| RP11-1100L3.8 | RSPO4      | -0.305250145 | 6.40E-11    |
| RP11-1100L3.8 | ADAMTS9    | -0.102255225 | 0.032193973 |
| RP11-1100L3.8 | ABTB2      | -0.451468788 | 1.97E-23    |
| RP11-1100L3.8 | KCNQ3      | -0.423832102 | 1.45E-20    |
| RP11-1100L3.8 | ANXA1      | -0.244262581 | 2.20E-07    |
| RP11-1100L3.8 | S100A11    | -0.353318755 | 2.36E-14    |
| RP11-1100L3.8 | CEACAM6    | -0.288632739 | 7.19E-10    |
| RP11-1100L3.8 | IER5L      | -0.334718657 | 5.94E-13    |
| RP11-1100L3.8 | KRT80      | -0.371640428 | 7.96E-16    |
| RP11-1100L3.8 | CDH6       | -0.269433002 | 9.72E-09    |
| RP11-1100L3.8 | UNC5B      | -0.315200446 | 1.40E-11    |
| RP11-1100L3.8 | PLEKHN1    | -0.355912389 | 1.48E-14    |
| RP11-1100L3.8 | SYTL1      | -0.184978198 | 9.68E-05    |
| RP11-1100L3.8 | TMEM163    | -0.234158386 | 7.00E-07    |
| RP11-1100L3.8 | C4orf48    | -0.073109392 | 0.126142553 |
| RP11-1100L3.8 | B3GNT7     | -0.287702194 | 8.19E-10    |
| RP11-1100L3.8 | BAIAP3     | -0.259473339 | 3.47E-08    |
| RP11-1100L3.8 | PHLDA2     | -0.310752433 | 2.78E-11    |
| RP11-1100L3.8 | GAP43      | -0.296315481 | 2.40E-10    |
| RP11-1100L3.8 | S100A1     | -0.406820438 | 6.29E-19    |
| RP11-1100L3.8 | PTPRE      | -0.385081909 | 5.75E-17    |
| RP11-1100L3.8 | CCND1      | -0.311441053 | 2.50E-11    |
| RP11-1100L3.8 | ST6GALNAC5 | -0.376126152 | 3.36E-16    |
| RP11-1100L3.8 | KRT17      | 0.021071753  | 0.65972537  |
| RP11-1100L3.8 | HPCAL4     | -0.26156799  | 2.67E-08    |
| RP11-1100L3.8 | GABBR2     | -0.299034983 | 1.61E-10    |
| RP11-1100L3.8 | DIRAS3     | -0.255078089 | 5.99E-08    |
| RP11-1100L3.8 | SERINC2    | -0.423538783 | 1.55E-20    |
| RP11-1100L3.8 | PTCHD4     | -0.166783328 | 0.000449551 |
| RP11-1100L3.8 | EPS8       | -0.358530136 | 9.21E-15    |
| RP11-1100L3.8 | LY6E       | -0.33519835  | 5.48E-13    |
| RP11-1100L3.8 | UPP1       | -0.336479281 | 4.42E-13    |

|               |         |              |             |
|---------------|---------|--------------|-------------|
| RP11-1100L3.8 | AHNAK2  | -0.41055189  | 2.80E-19    |
| RP11-1100L3.8 | PLXNC1  | -0.366771584 | 2.00E-15    |
| RP11-1100L3.8 | TNC     | -0.341638182 | 1.83E-13    |
| RP11-1100L3.8 | DUSP4   | -0.178057254 | 0.000176774 |
| RP11-1100L3.8 | NRCAM   | -0.346177397 | 8.36E-14    |
| RP11-1100L3.8 | NRP2    | -0.289998112 | 5.93E-10    |
| RP11-1100L3.8 | CTSC    | -0.387621503 | 3.45E-17    |
| RP11-1100L3.8 | AMIGO2  | -0.130500533 | 0.006177407 |
| RP11-1100L3.8 | NAB2    | -0.289620116 | 6.25E-10    |
| RP11-1100L3.8 | TBC1D2  | -0.463101136 | 1.01E-24    |
| RP11-1100L3.8 | PHLDA3  | -0.343307605 | 1.38E-13    |
| RP11-1100L3.8 | PTP4A3  | -0.231838214 | 9.07E-07    |
| RP11-1100L3.8 | CRABP2  | -0.279696338 | 2.48E-09    |
| RP11-1100L3.8 | GOS2    | -0.23323148  | 7.77E-07    |
| RP11-1100L3.8 | S100A6  | -0.391459475 | 1.58E-17    |
| RP11-1100L3.8 | FOXQ1   | -0.215479284 | 5.22E-06    |
| RP11-1100L3.8 | LRG1    | -0.341176786 | 1.99E-13    |
| RP11-1100L3.8 | LAMP5   | -0.153960824 | 0.001212367 |
| RP11-1100L3.8 | ALDH3B1 | -0.368155205 | 1.54E-15    |
| RP11-1100L3.8 | CDH2    | 0.002728805  | 0.95453571  |
| RP11-1100L3.8 | SCG5    | -0.176912912 | 0.000194854 |
| RP11-1100L3.8 | ZCCHC16 | -0.247929518 | 1.42E-07    |
| RP11-1100L3.8 | GRB7    | -0.356870925 | 1.25E-14    |
| RP11-1100L3.8 | TIAM1   | -0.235941846 | 5.73E-07    |
| RP11-1100L3.8 | FXYD5   | -0.191118186 | 5.57E-05    |
| RP11-1100L3.8 | CLDN9   | -0.250626672 | 1.03E-07    |
| RP11-1100L3.8 | FAM43A  | -0.37218877  | 7.17E-16    |
| RP11-1100L3.8 | CHST2   | -0.235424992 | 6.07E-07    |
| RP11-1100L3.8 | HMGA2   | -0.286674442 | 9.46E-10    |
| RP11-1100L3.8 | GALNT7  | -0.429121919 | 4.29E-21    |
| RP11-1100L3.8 | CBLN1   | -0.260155292 | 3.19E-08    |
| RP11-1100L3.8 | STRA6   | -0.264012411 | 1.96E-08    |
| RP11-1100L3.8 | MUC21   | -0.394119578 | 9.16E-18    |
| RP11-1100L3.8 | PRR36   | -0.307374156 | 4.65E-11    |
| RP11-1100L3.8 | NFE2L3  | -0.29111976  | 5.05E-10    |
| RP11-1100L3.8 | NR1D1   | -0.401976416 | 1.77E-18    |
| RP11-1100L3.8 | MUC1    | -0.414078245 | 1.29E-19    |
| RP11-1100L3.8 | NAT8L   | -0.15154945  | 0.001449173 |
| RP11-1100L3.8 | APOC1   | -0.002909647 | 0.951526299 |
| RP11-1100L3.8 | EVA1A   | -0.299985717 | 1.40E-10    |
| RP11-1100L3.8 | ENTPD1  | -0.204390172 | 1.59E-05    |
| RP11-1100L3.8 | COL1A1  | -0.208568553 | 1.05E-05    |
| RP11-1100L3.8 | FNDC4   | -0.235870786 | 5.77E-07    |
| RP11-1100L3.8 | FRMD3   | -0.235729941 | 5.87E-07    |
| RP11-1100L3.8 | SHROOM4 | -0.297003165 | 2.17E-10    |
| RP11-1100L3.8 | NELL2   | -0.112009933 | 0.018896355 |
| RP11-1100L3.8 | EPHB3   | -0.393115565 | 1.13E-17    |
| RP11-1100L3.8 | TMC6    | -0.389703105 | 2.26E-17    |
| RP11-1100L3.8 | NOD1    | -0.273510394 | 5.68E-09    |
| RP11-1100L3.8 | GGCT    | -0.449468742 | 3.24E-23    |
| RP11-1100L3.8 | ICAM1   | -0.364255818 | 3.20E-15    |

|               |           |              |             |
|---------------|-----------|--------------|-------------|
| RP11-1100L3.8 | PRSS23    | -0.217456919 | 4.26E-06    |
| RP11-1100L3.8 | CFI       | -0.28048864  | 2.22E-09    |
| RP11-1100L3.8 | CD55      | -0.325354568 | 2.78E-12    |
| RP11-1100L3.8 | RASD2     | -0.279553224 | 2.53E-09    |
| RP11-1100L3.8 | KLK11     | -0.243342471 | 2.45E-07    |
| RP11-1100L3.8 | ICAM5     | -0.178113138 | 0.000175933 |
| RP11-1100L3.8 | ADORA1    | -0.455542351 | 7.05E-24    |
| RP11-1100L3.8 | ITGA2     | -0.385362605 | 5.43E-17    |
| RP11-1100L3.8 | ABCC3     | -0.24939198  | 1.19E-07    |
| RP11-1100L3.8 | MFGE8     | -0.377350791 | 2.64E-16    |
| RP11-1100L3.8 | STK32A    | -0.283528778 | 1.46E-09    |
| RP11-1100L3.8 | CYSLTR2   | -0.112164252 | 0.018731881 |
| RP11-1100L3.8 | LAD1      | -0.518658323 | 1.35E-31    |
| RP11-1100L3.8 | MGAT3     | -0.279356922 | 2.59E-09    |
| RP11-1100L3.8 | IGFBP6    | -0.207302089 | 1.19E-05    |
| RP11-1100L3.8 | CYP2S1    | -0.336042707 | 4.75E-13    |
| RP11-1100L3.8 | KCNJ2     | -0.269790431 | 9.28E-09    |
| RP11-1100L3.8 | FAM20A    | -0.261368141 | 2.74E-08    |
| RP11-1100L3.8 | TGFA      | -0.358464749 | 9.32E-15    |
| RP11-1100L3.8 | MXRA8     | -0.27218521  | 6.77E-09    |
| RP11-1100L3.8 | C8orf4    | 0.00120207   | 0.979963745 |
| RP11-1100L3.8 | CLDN10    | -0.276572051 | 3.78E-09    |
| RP11-1100L3.8 | PDE5A     | -0.411670276 | 2.19E-19    |
| RP11-1100L3.8 | APOE      | -0.016261488 | 0.734031965 |
| RP11-1100L3.8 | SPOCK2    | -0.239263672 | 3.92E-07    |
| RP11-1100L3.8 | TENM1     | -0.155675635 | 0.001066236 |
| RP11-1100L3.8 | SLIT1     | -0.156074765 | 0.00103464  |
| RP11-1100L3.8 | CXCL14    | 0.028742022  | 0.548093539 |
| RP11-1100L3.8 | ECM1      | -0.119171433 | 0.012464623 |
| RP11-1100L3.8 | DUSP5     | -0.221485662 | 2.79E-06    |
| RP11-1100L3.8 | SEZ6L2    | -0.371715601 | 7.85E-16    |
| RP11-1100L3.8 | THRSP     | -0.298395581 | 1.77E-10    |
| RP11-1100L3.8 | C19orf33  | -0.265190085 | 1.68E-08    |
| RP11-1100L3.8 | MPZL2     | -0.336980676 | 4.06E-13    |
| RP11-1100L3.8 | CTSH      | -0.385620039 | 5.16E-17    |
| RP11-1100L3.8 | CYP1B1    | -0.456922142 | 4.97E-24    |
| RP11-1100L3.8 | ALOX5     | -0.381191599 | 1.25E-16    |
| RP11-1100L3.8 | SYTL5     | -0.306631011 | 5.20E-11    |
| RP11-1100L3.8 | TNFRSF12A | -0.212460564 | 7.12E-06    |
| RP11-1100L3.8 | DUSP6     | -0.131528569 | 0.005780629 |
| RP11-1100L3.8 | ALOX15B   | -0.405189169 | 8.93E-19    |
| RP11-1100L3.8 | SDC4      | -0.323333814 | 3.85E-12    |
| RP11-1100L3.8 | MDK       | -0.240745729 | 3.31E-07    |
| RP11-1100L3.8 | KRT19     | -0.346870129 | 7.40E-14    |
| RP11-1100L3.8 | MET       | -0.490962491 | 5.18E-28    |
| RP11-1100L3.8 | TESC      | -0.135862829 | 0.004347787 |
| RP11-1100L3.8 | CXCL17    | -0.560762275 | 1.01E-37    |
| RP11-1100L3.8 | NPC2      | -0.395988335 | 6.22E-18    |
| RP11-1100L3.8 | COMP      | -0.16928108  | 0.000367391 |
| RP11-1100L3.8 | TUSC3     | -0.214806834 | 5.60E-06    |
| RP11-1100L3.8 | TMPRSS4   | -0.379198504 | 1.84E-16    |

|               |          |              |             |
|---------------|----------|--------------|-------------|
| RP11-1100L3.8 | LGALS3   | -0.374630213 | 4.48E-16    |
| RP11-1100L3.8 | CRLF1    | -0.133264798 | 0.005162247 |
| RP11-1100L3.8 | CTXN1    | -0.254010055 | 6.83E-08    |
| RP11-1100L3.8 | PCSK1N   | -0.013765863 | 0.773639051 |
| RP11-1100L3.8 | NMU      | -0.335634547 | 5.09E-13    |
| RP11-1100L3.8 | GALE     | -0.35796378  | 1.02E-14    |
| RP11-1100L3.8 | PCSK2    | -0.126587672 | 0.007920634 |
| RP11-1100L3.8 | GJB3     | -0.381482224 | 1.18E-16    |
| RP11-1100L3.8 | SLPI     | -0.263021111 | 2.22E-08    |
| RP11-1100L3.8 | AGR2     | -0.089609308 | 0.060662705 |
| RP11-1100L3.8 | MRC2     | -0.262565247 | 2.35E-08    |
| RP11-1100L3.8 | GOLT1A   | -0.32246109  | 4.43E-12    |
| RP11-1100L3.8 | SLC27A6  | -0.224653177 | 1.99E-06    |
| RP11-1100L3.8 | KCNN4    | -0.352595386 | 2.69E-14    |
| RP11-1100L3.8 | ETV4     | -0.183491041 | 0.000110418 |
| RP11-1100L3.8 | SYT12    | -0.403498045 | 1.28E-18    |
| RP11-1100L3.8 | PVRL4    | -0.498639285 | 5.67E-29    |
| RP11-1100L3.8 | PLCD3    | -0.415796177 | 8.83E-20    |
| RP11-1100L3.8 | PLAU     | -0.358333266 | 9.54E-15    |
| RP11-1100L3.8 | LRRK2    | -0.176868375 | 0.000195592 |
| RP11-1100L3.8 | SFN      | -0.348211625 | 5.85E-14    |
| RP11-1100L3.8 | LPAR5    | -0.41502983  | 1.05E-19    |
| RP11-1100L3.8 | NGEF     | -0.397493936 | 4.54E-18    |
| RP11-1100L3.8 | DTX4     | -0.46682195  | 3.84E-25    |
| RP11-1100L3.8 | CST6     | -0.292275166 | 4.29E-10    |
| RP11-1100L3.8 | QPCT     | -0.327867497 | 1.85E-12    |
| RP11-1100L3.8 | TIMP1    | -0.344747962 | 1.07E-13    |
| RP11-1100L3.8 | CAMK2N1  | -0.354802797 | 1.81E-14    |
| RP11-1100L3.8 | KLHDC8A  | -0.126652491 | 0.007888502 |
| RP11-1100L3.8 | PDLIM4   | -0.430310514 | 3.25E-21    |
| RP11-1100L3.8 | SCEL     | -0.32810479  | 1.78E-12    |
| RP11-1100L3.8 | LCN2     | -0.501549216 | 2.41E-29    |
| RP11-1100L3.8 | PROS1    | -0.519418144 | 1.06E-31    |
| RP11-1100L3.8 | GABRB2   | -0.427379024 | 6.41E-21    |
| RP11-1100L3.8 | TMPRSS6  | -0.40348145  | 1.29E-18    |
| RP11-1100L3.8 | KLK7     | -0.339343222 | 2.72E-13    |
| RP11-1100L3.8 | PDZK1IP1 | -0.397406139 | 4.63E-18    |
| RP11-1100L3.8 | CDH3     | -0.300591787 | 1.28E-10    |
| RP11-1100L3.8 | LRP4     | -0.202420479 | 1.93E-05    |
| RP11-1100L3.8 | IGSF1    | -0.143933079 | 0.002503737 |
| RP11-1100L3.8 | B3GNT3   | -0.41185438  | 2.11E-19    |
| RP11-1100L3.8 | CLDN1    | -0.313340819 | 1.86E-11    |
| RP11-1100L3.8 | GDF15    | -0.411819063 | 2.12E-19    |
| RP11-1100L3.8 | ARHGAP36 | -0.169776672 | 0.000352852 |
| RP11-1100L3.8 | LAMB3    | -0.324734172 | 3.07E-12    |
| RP11-1100L3.8 | KLK10    | -0.411185476 | 2.44E-19    |
| RP11-1100L3.8 | DPP4     | -0.447002052 | 5.95E-23    |
| RP11-1100L3.8 | METTL7B  | -0.371331081 | 8.44E-16    |
| RP11-1100L3.8 | LIPH     | -0.430735742 | 2.94E-21    |
| RP11-1100L3.8 | CLDN16   | -0.351742803 | 3.13E-14    |
| RP11-1100L3.8 | CHI3L1   | -0.492147257 | 3.70E-28    |

|               |           |              |             |
|---------------|-----------|--------------|-------------|
| RP11-1100L3.8 | SLC22A31  | -0.258591345 | 3.88E-08    |
| RP11-1100L3.8 | TACSTD2   | -0.432765573 | 1.83E-21    |
| RP11-1100L3.8 | SFTPB     | -0.402064071 | 1.74E-18    |
| RP11-1100L3.8 | RXRG      | -0.317433105 | 9.84E-12    |
| RP11-1100L3.8 | DCSTAMP   | -0.51391465  | 5.84E-31    |
| RP11-1100L3.8 | CITED1    | -0.439887359 | 3.37E-22    |
| RP11-1100L3.8 | SERPINA1  | -0.452658659 | 1.46E-23    |
| RP11-1100L3.8 | PRR15     | -0.212573183 | 7.03E-06    |
| RP11-1100L3.8 | SLC34A2   | -0.551119457 | 3.05E-36    |
| RP11-1100L3.8 | FN1       | -0.511085921 | 1.39E-30    |
| RP11-1100L3.8 | ZCCHC12   | -0.169846301 | 0.000350853 |
| LINC00092     | TFF3      | 0.703955979  | 0           |
| LINC00092     | CCL21     | 0.547710163  | 9.92E-36    |
| LINC00092     | TPO       | 0.629874304  | 0           |
| LINC00092     | MT1G      | 0.578367994  | 0           |
| LINC00092     | DIO1      | 0.631416499  | 0           |
| LINC00092     | DPT       | 0.546698438  | 1.40E-35    |
| LINC00092     | CDH16     | 0.737148138  | 0           |
| LINC00092     | CRABP1    | 0.546107809  | 1.72E-35    |
| LINC00092     | SLC26A7   | 0.491748058  | 0           |
| LINC00092     | MT1H      | 0.585652548  | 8.94E-42    |
| LINC00092     | SLC26A4   | 0.569197656  | 0           |
| LINC00092     | SLC5A8    | 0.62285664   | 1.58E-48    |
| LINC00092     | PKHD1L1   | 0.645349247  | 4.51E-53    |
| LINC00092     | TFCP2L1   | 0.61014405   | 0           |
| LINC00092     | WSCD2     | 0.638738793  | 1.07E-51    |
| LINC00092     | IPCEF1    | 0.665194161  | 0           |
| LINC00092     | SLC5A5    | 0.638317606  | 1.30E-51    |
| LINC00092     | MT1F      | 0.64800889   | 0           |
| LINC00092     | FOSB      | 0.309499826  | 4.27E-11    |
| LINC00092     | SEMA3D    | 0.602849175  | 8.72E-45    |
| LINC00092     | BMP8A     | 0.552444563  | 0           |
| LINC00092     | MATN2     | 0.580199536  | 0           |
| LINC00092     | PLA2R1    | 0.660999044  | 0           |
| LINC00092     | COL23A1   | 0.60357231   | 0           |
| LINC00092     | HGD       | 0.617962254  | 0           |
| LINC00092     | TCEAL2    | 0.505123866  | 0           |
| LINC00092     | CHRD1     | 0.452089419  | 1.68E-23    |
| LINC00092     | TNFRSF11B | 0.48380915   | 0           |
| LINC00092     | FAM167A   | 0.504914798  | 0           |
| LINC00092     | KIT       | 0.696843556  | 0           |
| LINC00092     | SLC4A4    | 0.585222131  | 0           |
| LINC00092     | SMOC2     | 0.565880653  | 0           |
| LINC00092     | FHL1      | 0.511950346  | 0           |
| LINC00092     | OTOS      | 0.65793905   | 0           |
| LINC00092     | IGFBPL1   | 0.645623565  | 3.95E-53    |
| LINC00092     | HBB       | 0.302471512  | 1.21E-10    |
| LINC00092     | BEX1      | 0.381138782  | 3.27E-17    |
| LINC00092     | FABP4     | 0.470501206  | 1.45E-25    |
| LINC00092     | LMOD1     | 0.542053717  | 0           |
| LINC00092     | SOD3      | 0.544203258  | 0           |

|           |            |             |          |
|-----------|------------|-------------|----------|
| LINC00092 | TMEM171    | 0.655292511 | 0        |
| LINC00092 | PI16       | 0.507380637 | 0        |
| LINC00092 | ZMAT4      | 0.636153419 | 3.61E-51 |
| LINC00092 | MFAP4      | 0.303693864 | 1.01E-10 |
| LINC00092 | CWH43      | 0.663665747 | 4.58E-57 |
| LINC00092 | SPX        | 0.456885909 | 0        |
| LINC00092 | APOD       | 0.41141718  | 0        |
| LINC00092 | DPP6       | 0.689971831 | 0        |
| LINC00092 | MMRN1      | 0.481517629 | 0        |
| LINC00092 | WDR72      | 0.538919258 | 0        |
| LINC00092 | MPPED2     | 0.551290292 | 0        |
| LINC00092 | PAPSS2     | 0.612553153 | 0        |
| LINC00092 | DCN        | 0.392710848 | 0        |
| LINC00092 | SORBS2     | 0.548815944 | 0        |
| LINC00092 | EGR2       | 0.298706304 | 2.08E-10 |
| LINC00092 | EDN3       | 0.259940594 | 3.27E-08 |
| LINC00092 | DIO2       | 0.480974818 | 0        |
| LINC00092 | ITPR1      | 0.539960484 | 0        |
| LINC00092 | CFD        | 0.456931581 | 0        |
| LINC00092 | CPXM1      | 0.546811927 | 0        |
| LINC00092 | ELM01      | 0.581783999 | 0        |
| LINC00092 | GPC3       | 0.518313461 | 1.50E-31 |
| LINC00092 | MYOC       | 0.287798056 | 8.08E-10 |
| LINC00092 | DEPTOR     | 0.555290951 | 0        |
| LINC00092 | DGKI       | 0.615622934 | 0        |
| LINC00092 | CARTPT     | 0.533121354 | 1.32E-33 |
| LINC00092 | IYD        | 0.441238153 | 0        |
| LINC00092 | LYVE1      | 0.443340605 | 0        |
| LINC00092 | CLCNKB     | 0.587387984 | 0        |
| LINC00092 | NCAM1      | 0.569325735 | 0        |
| LINC00092 | HBA2       | 0.303664646 | 1.01E-10 |
| LINC00092 | GLT8D2     | 0.540308694 | 0        |
| LINC00092 | OGDHL      | 0.505397754 | 0        |
| LINC00092 | LIFR       | 0.477398111 | 0        |
| LINC00092 | CSGALNACT1 | 0.558670504 | 0        |
| LINC00092 | RAP1GAP    | 0.539671704 | 0        |
| LINC00092 | COL9A3     | 0.549015508 | 0        |
| LINC00092 | FBLN1      | 0.421859371 | 0        |
| LINC00092 | EFEMP1     | 0.484374512 | 0        |
| LINC00092 | AOX1       | 0.623576828 | 1.14E-48 |
| LINC00092 | GRIN2C     | 0.605272795 | 0        |
| LINC00092 | C11orf74   | 0.599640868 | 0        |
| LINC00092 | PPARGC1A   | 0.517038044 | 0        |
| LINC00092 | ANGPTL1    | 0.498923172 | 0        |
| LINC00092 | SCARA5     | 0.466593143 | 4.07E-25 |
| LINC00092 | LTF        | 0.60080989  | 0        |
| LINC00092 | CA4        | 0.373445739 | 5.63E-16 |
| LINC00092 | TG         | 0.363915215 | 4.04E-15 |
| LINC00092 | FCGBP      | 0.534462735 | 0        |
| LINC00092 | PBX4       | 0.632048383 | 0        |
| LINC00092 | CYR61      | 0.338782527 | 4.07E-13 |

|           |          |             |          |
|-----------|----------|-------------|----------|
| LINC00092 | FOS      | 0.332560557 | 1.15E-12 |
| LINC00092 | KHDRBS2  | 0.543574352 | 0        |
| LINC00092 | MUM1L1   | 0.494108086 | 0        |
| LINC00092 | RGS16    | 0.614618728 | 0        |
| LINC00092 | MT1M     | 0.597428209 | 0        |
| LINC00092 | LRP2     | 0.456432598 | 0        |
| LINC00092 | MAFB     | 0.571864194 | 0        |
| LINC00092 | KCNK2    | 0.522275663 | 0        |
| LINC00092 | TBC1D4   | 0.494950031 | 0        |
| LINC00092 | MIOX     | 0.582193149 | 3.43E-41 |
| LINC00092 | TPPP     | 0.555659302 | 0        |
| LINC00092 | FMOD     | 0.638727636 | 0        |
| LINC00092 | CITED2   | 0.391651183 | 0        |
| LINC00092 | RGS8     | 0.656525329 | 1.78E-55 |
| LINC00092 | ABI3BP   | 0.433085638 | 0        |
| LINC00092 | ADH1B    | 0.465524998 | 5.39E-25 |
| LINC00092 | OGN      | 0.408968574 | 3.95E-19 |
| LINC00092 | NR4A1    | 0.249346273 | 1.32E-07 |
| LINC00092 | FOXJ1    | 0.498958116 | 5.16E-29 |
| LINC00092 | ALDH1A1  | 0.452203156 | 0        |
| LINC00092 | OCA2     | 0.606855591 | 1.63E-45 |
| LINC00092 | TMEM139  | 0.539367321 | 0        |
| LINC00092 | ARHGAP24 | 0.50153638  | 0        |
| LINC00092 | SLC25A15 | 0.522567848 | 0        |
| LINC00092 | DES      | 0.370337827 | 1.02E-15 |
| LINC00092 | GDF10    | 0.592681116 | 5.53E-43 |
| LINC00092 | KIAA1324 | 0.544676711 | 0        |
| LINC00092 | JUN      | 0.390616906 | 0        |
| LINC00092 | C7       | 0.335993441 | 6.50E-13 |
| LINC00092 | LGI3     | 0.438574735 | 0        |
| LINC00092 | CDON     | 0.476502835 | 0        |
| LINC00092 | BCL2     | 0.570158602 | 0        |
| LINC00092 | HLF      | 0.410203905 | 0        |
| LINC00092 | EGR1     | 0.285737142 | 1.28E-09 |
| LINC00092 | IP6K3    | 0.562095303 | 0        |
| LINC00092 | SCUBE3   | 0.592558657 | 0        |
| LINC00092 | PKNOX2   | 0.537410962 | 0        |
| LINC00092 | SMAD9    | 0.545373415 | 0        |
| LINC00092 | IQGAP2   | 0.505039048 | 0        |
| LINC00092 | GNA14    | 0.516881739 | 0        |
| LINC00092 | LAYN     | 0.589915805 | 0        |
| LINC00092 | AVPR1A   | 0.511294916 | 0        |
| LINC00092 | PDLIM3   | 0.557486022 | 0        |
| LINC00092 | GPM6A    | 0.492578798 | 0        |
| LINC00092 | SDPR     | 0.284779599 | 1.46E-09 |
| LINC00092 | CRYAB    | 0.472840742 | 0        |
| LINC00092 | FOXA2    | 0.460930743 | 1.78E-24 |
| LINC00092 | C8orf88  | 0.47701274  | 0        |
| LINC00092 | ISM1     | 0.429671335 | 0        |
| LINC00092 | BMP2     | 0.419040075 | 0        |
| LINC00092 | ID4      | 0.560496799 | 0        |

|           |          |             |          |
|-----------|----------|-------------|----------|
| LINC00092 | NUPR1    | 0.431040205 | 0        |
| LINC00092 | SERTM1   | 0.532321849 | 1.72E-33 |
| LINC00092 | IRS1     | 0.413267871 | 0        |
| LINC00092 | FIBIN    | 0.412770732 | 0        |
| LINC00092 | PODN     | 0.438859119 | 0        |
| LINC00092 | TDRD9    | 0.44715262  | 0        |
| LINC00092 | EPHA3    | 0.427687034 | 0        |
| LINC00092 | AIF1L    | 0.431222891 | 0        |
| LINC00092 | EBF4     | 0.510055543 | 0        |
| LINC00092 | ADM2     | 0.507222914 | 0        |
| LINC00092 | GSTM3    | 0.488262836 | 0        |
| LINC00092 | HSD17B6  | 0.476678997 | 0        |
| LINC00092 | AGR3     | 0.459988374 | 2.27E-24 |
| LINC00092 | EPHB1    | 0.434431105 | 0        |
| LINC00092 | TMOD1    | 0.404238093 | 0        |
| LINC00092 | WASF3    | 0.425410122 | 0        |
| LINC00092 | SELV     | 0.622366766 | 1.96E-48 |
| LINC00092 | ENPP1    | 0.376622262 | 1.96E-16 |
| LINC00092 | SYNE1    | 0.510461641 | 1.68E-30 |
| LINC00092 | PLCH1    | 0.563812242 | 0        |
| LINC00092 | CCDC146  | 0.567661276 | 0        |
| LINC00092 | SLC16A2  | 0.542256827 | 0        |
| LINC00092 | IER2     | 0.406387068 | 0        |
| LINC00092 | KCNAB1   | 0.381949665 | 1.88E-17 |
| LINC00092 | SYNDIG1  | 0.569471401 | 0        |
| LINC00092 | C16orf89 | 0.419770961 | 0        |
| LINC00092 | CTGF     | 0.219770394 | 3.54E-06 |
| LINC00092 | NR4A3    | 0.238917981 | 4.43E-07 |
| LINC00092 | KIAA1456 | 0.463959043 | 0        |
| LINC00092 | AQP4     | 0.410858909 | 0        |
| LINC00092 | RNF150   | 0.567190802 | 0        |
| LINC00092 | C1S      | 0.396266705 | 0        |
| LINC00092 | PFKFB2   | 0.386129038 | 0        |
| LINC00092 | PROX1    | 0.574367761 | 0        |
| LINC00092 | TCF7L1   | 0.579244122 | 0        |
| LINC00092 | HSPB6    | 0.367319448 | 1.97E-15 |
| LINC00092 | FHDC1    | 0.49912373  | 0        |
| LINC00092 | PRR15L   | 0.444310203 | 0        |
| LINC00092 | SLC1A1   | 0.502383857 | 0        |
| LINC00092 | BTBD11   | 0.46377891  | 0        |
| LINC00092 | TRIM58   | 0.421681508 | 0        |
| LINC00092 | LRIG1    | 0.578381468 | 0        |
| LINC00092 | ROR2     | 0.646591228 | 0        |
| LINC00092 | GPR125   | 0.514226122 | 0        |
| LINC00092 | FLRT1    | 0.586274563 | 0        |
| LINC00092 | PGF      | 0.510183055 | 0        |
| LINC00092 | DUSP1    | 0.31012476  | 3.89E-11 |
| LINC00092 | PLA2G7   | 0.61925978  | 0        |
| LINC00092 | PLSCR4   | 0.488459847 | 0        |
| LINC00092 | FAM46B   | 0.497010641 | 0        |
| LINC00092 | GLDC     | 0.530671003 | 0        |



|           |          |             |             |
|-----------|----------|-------------|-------------|
| LINC00092 | ZBTB16   | 0.335350494 | 7.23E-13    |
| LINC00092 | OMD      | 0.388438859 | 2.92E-17    |
| LINC00092 | HSD11B2  | 0.464798435 | 0           |
| LINC00092 | FGL2     | 0.41830082  | 0           |
| LINC00092 | CLCNKA   | 0.575065691 | 5.22E-40    |
| LINC00092 | GATM     | 0.363219079 | 4.66E-15    |
| LINC00092 | TNS3     | 0.569035394 | 0           |
| LINC00092 | TOB1     | 0.430381372 | 0           |
| LINC00092 | MARC2    | 0.531405436 | 0           |
| LINC00092 | LRRC2    | 0.423229376 | 0           |
| LINC00092 | SORD     | 0.478552666 | 0           |
| LINC00092 | RIMS4    | 0.410495522 | 0           |
| LINC00092 | SLC29A4  | 0.577085786 | 0           |
| LINC00092 | SLC39A14 | 0.399233512 | 0           |
| LINC00092 | FAXDC2   | 0.4778605   | 0           |
| LINC00092 | HSPB8    | 0.528671525 | 0           |
| LINC00092 | CCL19    | 0.310117989 | 3.06E-11    |
| LINC00092 | KCNIP3   | 0.41038801  | 0           |
| LINC00092 | CGNL1    | 0.364199173 | 3.81E-15    |
| LINC00092 | ATF3     | 0.173875302 | 0.000256768 |
| LINC00092 | SGCD     | 0.482167385 | 0           |
| LINC00092 | STARD13  | 0.465740801 | 0           |
| LINC00092 | LDHD     | 0.502728237 | 0           |
| LINC00092 | RCAN1    | 0.364819427 | 3.35E-15    |
| LINC00092 | ID3      | 0.555210387 | 0           |
| LINC00092 | SYTL3    | 0.496200325 | 0           |
| LINC00092 | MT1E     | 0.4778466   | 0           |
| LINC00092 | CAMK1D   | 0.412058    | 0           |
| LINC00092 | PRKCQ    | 0.548834382 | 0           |
| LINC00092 | NUAK2    | 0.603593444 | 0           |
| LINC00092 | LIPG     | 0.313950107 | 2.18E-11    |
| LINC00092 | SLC25A25 | 0.395173282 | 0           |
| LINC00092 | PRKX     | 0.445024495 | 0           |
| LINC00092 | SRPX     | 0.312891719 | 2.56E-11    |
| LINC00092 | FAM189A1 | 0.419371548 | 0           |
| LINC00092 | PLEKHH1  | 0.484627124 | 0           |
| LINC00092 | WNT11    | 0.587244161 | 0           |
| LINC00092 | SNAI1    | 0.551277669 | 0           |
| LINC00092 | FDCSP    | 0.268191384 | 1.14E-08    |
| LINC00092 | MT1X     | 0.415261675 | 0           |
| LINC00092 | ACACB    | 0.491530054 | 0           |
| LINC00092 | ARC      | 0.127721784 | 0.007409094 |
| LINC00092 | KLK4     | 0.542951242 | 5.02E-35    |
| LINC00092 | ZFPM2    | 0.435020013 | 0           |
| LINC00092 | AKAP12   | 0.371244224 | 8.12E-16    |
| LINC00092 | GJB6     | 0.544392121 | 3.08E-35    |
| LINC00092 | ERO1LB   | 0.52119841  | 0           |
| LINC00092 | DNALI1   | 0.480916523 | 0           |
| LINC00092 | HKDC1    | 0.528409268 | 0           |
| LINC00092 | ZFP36L2  | 0.539892402 | 0           |
| LINC00092 | CAPSL    | 0.450248136 | 2.67E-23    |

|           |          |             |             |
|-----------|----------|-------------|-------------|
| LINC00092 | CYP7B1   | 0.454330713 | 0           |
| LINC00092 | CPQ      | 0.424496833 | 0           |
| LINC00092 | RPS6KA6  | 0.484940814 | 2.83E-27    |
| LINC00092 | TLE1     | 0.575685853 | 0           |
| LINC00092 | TP53INP2 | 0.418564495 | 0           |
| LINC00092 | KATNAL2  | 0.461641992 | 0           |
| LINC00092 | SGPP2    | 0.520192501 | 0           |
| LINC00092 | CTH      | 0.567404693 | 0           |
| LINC00092 | KIF12    | 0.549412511 | 0           |
| LINC00092 | TMEM220  | 0.503208781 | 0           |
| LINC00092 | CENPJ    | 0.517496177 | 0           |
| LINC00092 | FAM155B  | 0.190023885 | 6.35E-05    |
| LINC00092 | WFS1     | 0.579897565 | 0           |
| LINC00092 | SELENBP1 | 0.496648105 | 0           |
| LINC00092 | SNTA1    | 0.492587592 | 0           |
| LINC00092 | FRAS1    | 0.450748191 | 0           |
| LINC00092 | FBLN7    | 0.566252833 | 0           |
| LINC00092 | AGPAT9   | 0.32643291  | 3.10E-12    |
| LINC00092 | GPR83    | 0.406198141 | 0           |
| LINC00092 | PRTG     | 0.421969721 | 0           |
| LINC00092 | EGR3     | 0.159329337 | 0.000818544 |
| LINC00092 | GRAMD2   | 0.606234735 | 0           |
| LINC00092 | HYOU1    | 0.413185038 | 0           |
| LINC00092 | FBLN5    | 0.404320926 | 0           |
| LINC00092 | ITM2A    | 0.415654281 | 0           |
| LINC00092 | SRF      | 0.411663267 | 0           |
| LINC00092 | FGFR2    | 0.381328986 | 2.92E-17    |
| LINC00092 | MT1A     | 0.386139618 | 4.65E-17    |
| LINC00092 | MAMDC2   | 0.35832045  | 1.23E-14    |
| LINC00092 | FHL2     | 0.49319352  | 0           |
| LINC00092 | FTCDNL1  | 0.498509434 | 0           |
| LINC00092 | PKIA     | 0.287455499 | 1.01E-09    |
| LINC00092 | DNAJB4   | 0.283653696 | 1.70E-09    |
| LINC00092 | SLC25A33 | 0.484683859 | 0           |
| LINC00092 | EYA2     | 0.456510892 | 0           |
| LINC00092 | LPAR1    | 0.447310201 | 0           |
| LINC00092 | STX11    | 0.39842575  | 0           |
| LINC00092 | ARHGEF28 | 0.421345921 | 0           |
| LINC00092 | OR2W3    | 0.45034509  | 0           |
| LINC00092 | ALDH1B1  | 0.459534663 | 2.55E-24    |
| LINC00092 | CXCL12   | 0.357334682 | 1.48E-14    |
| LINC00092 | OLFM2    | 0.474565624 | 0           |
| LINC00092 | TUB      | 0.386933963 | 0           |
| LINC00092 | HTRA3    | 0.438261134 | 0           |
| LINC00092 | CKB      | 0.520206543 | 0           |
| LINC00092 | RGS2     | 0.314339167 | 2.05E-11    |
| LINC00092 | SHANK2   | 0.474447757 | 0           |
| LINC00092 | CNTFR    | 0.337910032 | 3.47E-13    |
| LINC00092 | CYTH3    | 0.566389139 | 0           |
| LINC00092 | PLAC9    | 0.402687104 | 0           |
| LINC00092 | WWOX     | 0.472918327 | 0           |

|           |          |             |          |
|-----------|----------|-------------|----------|
| LINC00092 | NPR3     | 0.366945991 | 2.14E-15 |
| LINC00092 | SDC2     | 0.376263698 | 2.18E-16 |
| LINC00092 | KLF15    | 0.366759334 | 2.23E-15 |
| LINC00092 | TMEM164  | 0.596066289 | 0        |
| LINC00092 | LONRF3   | 0.187759172 | 7.78E-05 |
| LINC00092 | GBP1     | 0.338253332 | 4.45E-13 |
| LINC00092 | ARHGAP6  | 0.527449315 | 0        |
| LINC00092 | TMEM119  | 0.335333331 | 7.26E-13 |
| LINC00092 | SH3RF1   | 0.431500183 | 0        |
| LINC00092 | CRELD2   | 0.525461325 | 0        |
| LINC00092 | PCP4     | 0.393595061 | 0        |
| LINC00092 | GCSH     | 0.492858784 | 0        |
| LINC00092 | IMPA2    | 0.455979995 | 0        |
| LINC00092 | C1R      | 0.415735128 | 0        |
| LINC00092 | SUCNR1   | 0.413601046 | 0        |
| LINC00092 | SFRP1    | 0.370958422 | 8.68E-16 |
| LINC00092 | UGT8     | 0.43204427  | 0        |
| LINC00092 | TLE4     | 0.415047643 | 0        |
| LINC00092 | ANTXR1   | 0.381470823 | 2.66E-17 |
| LINC00092 | GPX3     | 0.501815941 | 0        |
| LINC00092 | DPY19L2  | 0.491889895 | 0        |
| LINC00092 | FAM46C   | 0.487206149 | 0        |
| LINC00092 | IL33     | 0.371598617 | 8.02E-16 |
| LINC00092 | PEG3     | 0.378077086 | 1.23E-16 |
| LINC00092 | FAHD2A   | 0.565439539 | 0        |
| LINC00092 | PTGDS    | 0.26086515  | 3.28E-08 |
| LINC00092 | CHCHD10  | 0.462362666 | 0        |
| LINC00092 | CD36     | 0.370131511 | 1.05E-15 |
| LINC00092 | ANKRD37  | 0.527903619 | 0        |
| LINC00092 | TSPAN33  | 0.564521002 | 0        |
| LINC00092 | PRDM16   | 0.464982398 | 0        |
| LINC00092 | UST      | 0.259787897 | 3.75E-08 |
| LINC00092 | NEXN     | 0.372935206 | 5.37E-16 |
| LINC00092 | NUPR1L   | 0.240365869 | 3.45E-07 |
| LINC00092 | SLC24A3  | 0.482348085 | 0        |
| LINC00092 | MARC1    | 0.384750097 | 0        |
| LINC00092 | MYH11    | 0.28566055  | 1.30E-09 |
| LINC00092 | APOA1    | 0.56997317  | 3.51E-39 |
| LINC00092 | TMEM178B | 0.340928806 | 2.82E-13 |
| LINC00092 | CAPN6    | 0.326775536 | 2.21E-12 |
| LINC00092 | PPM1L    | 0.372877762 | 5.45E-16 |
| LINC00092 | FZD8     | 0.559821796 | 0        |
| LINC00092 | RCAN2    | 0.408591642 | 0        |
| LINC00092 | COPZ2    | 0.532629774 | 0        |
| LINC00092 | GAS1     | 0.403418559 | 0        |
| LINC00092 | DACT1    | 0.543379894 | 0        |
| LINC00092 | WBSCR17  | 0.427218262 | 0        |
| LINC00092 | NCS1     | 0.480478105 | 0        |
| LINC00092 | SPIRE2   | 0.611731349 | 0        |
| LINC00092 | C15orf52 | 0.392868429 | 0        |
| LINC00092 | SPAG5    | 0.631073253 | 0        |

|           |          |             |             |
|-----------|----------|-------------|-------------|
| LINC00092 | ARL4D    | 0.455197622 | 0           |
| LINC00092 | FAM189A2 | 0.428784995 | 0           |
| LINC00092 | MAP1LC3A | 0.491577427 | 0           |
| LINC00092 | KLF6     | 0.183675114 | 0.000111506 |
| LINC00092 | ADD3     | 0.380662635 | 4.25E-17    |
| LINC00092 | TSPAN7   | 0.333181378 | 1.04E-12    |
| LINC00092 | KLF9     | 0.262082396 | 2.82E-08    |
| LINC00092 | KCNQ1    | 0.385602113 | 0           |
| LINC00092 | MAN1A1   | 0.363624733 | 4.29E-15    |
| LINC00092 | MLF1     | 0.320089102 | 8.45E-12    |
| LINC00092 | RARB     | 0.456446781 | 0           |
| LINC00092 | CDC42EP2 | 0.561244848 | 0           |
| LINC00092 | FAM3B    | 0.411916305 | 0           |
| LINC00092 | GADD45B  | 0.351259372 | 4.58E-14    |
| LINC00092 | TMEM47   | 0.273016479 | 7.00E-09    |
| LINC00092 | SDF2L1   | 0.437162038 | 0           |
| LINC00092 | CCDC85A  | 0.385996136 | 0           |
| LINC00092 | CRYBG3   | 0.228575076 | 1.39E-06    |
| LINC00092 | FBLN2    | 0.280059969 | 2.76E-09    |
| LINC00092 | PEBP4    | 0.195359656 | 3.90E-05    |
| LINC00092 | CDADC1   | 0.429550348 | 0           |
| LINC00092 | FAM63A   | 0.465853704 | 0           |
| LINC00092 | GLUL     | 0.440644565 | 0           |
| LINC00092 | FREM2    | 0.37883946  | 9.34E-17    |
| LINC00092 | ACKR3    | 0.443284863 | 0           |
| LINC00092 | DENND6A  | 0.482489071 | 0           |
| LINC00092 | CLDN8    | 0.371268336 | 8.07E-16    |
| LINC00092 | UTS2R    | 0.334711632 | 5.94E-13    |
| LINC00092 | SCNN1B   | 0.5660588   | 0           |
| LINC00092 | TTC30A   | 0.49807754  | 0           |
| LINC00092 | CORO2B   | 0.436879782 | 0           |
| LINC00092 | TC2N     | 0.480019261 | 0           |
| LINC00092 | ALDH2    | 0.559912997 | 0           |
| LINC00092 | GPR183   | 0.188072774 | 7.56E-05    |
| LINC00092 | C4orf47  | 0.521593427 | 0           |
| LINC00092 | SLC25A42 | 0.381782723 | 2.14E-17    |
| LINC00092 | LGMN     | 0.475650536 | 0           |
| LINC00092 | ACSF2    | 0.552048412 | 0           |
| LINC00092 | KIAA1467 | 0.455225564 | 0           |
| LINC00092 | PRKG1    | 0.334920869 | 7.77E-13    |
| LINC00092 | GNAI1    | 0.411915879 | 0           |
| LINC00092 | ABCC4    | 0.363541049 | 4.37E-15    |
| LINC00092 | PRPS1    | 0.551478936 | 0           |
| LINC00092 | TSPAN5   | 0.575527989 | 0           |
| LINC00092 | CR2      | 0.211096658 | 8.17E-06    |
| LINC00092 | CCDC170  | 0.520221011 | 0           |
| LINC00092 | RRAD     | 0.268669312 | 1.23E-08    |
| LINC00092 | SCGB2A1  | 0.477185781 | 0           |
| LINC00092 | SESN3    | 0.310562611 | 3.64E-11    |
| LINC00092 | SGK223   | 0.454095689 | 0           |
| LINC00092 | NDRG2    | 0.482438861 | 0           |

|           |          |              |             |
|-----------|----------|--------------|-------------|
| LINC00092 | C3orf52  | 0.349823555  | 5.94E-14    |
| LINC00092 | FLRT3    | -0.348612407 | 7.38E-14    |
| LINC00092 | MST1R    | -0.346452228 | 1.08E-13    |
| LINC00092 | SDC1     | -0.223674603 | 2.35E-06    |
| LINC00092 | ST8SIA4  | -0.256249486 | 5.78E-08    |
| LINC00092 | UBTD1    | -0.371189758 | 8.22E-16    |
| LINC00092 | EPHA2    | -0.362645348 | 5.24E-15    |
| LINC00092 | TMEM130  | -0.353380121 | 3.11E-14    |
| LINC00092 | SPINK2   | -0.367495468 | 1.90E-15    |
| LINC00092 | MMP16    | -0.36044361  | 8.12E-15    |
| LINC00092 | SIGLEC15 | -0.423771194 | 0           |
| LINC00092 | RIN1     | -0.375245307 | 2.92E-16    |
| LINC00092 | IL1RN    | -0.274358825 | 5.88E-09    |
| LINC00092 | FCER1G   | -0.087034384 | 0.068493466 |
| LINC00092 | CD276    | -0.363155961 | 4.72E-15    |
| LINC00092 | CTSB     | -0.407598215 | 0           |
| LINC00092 | FAM171A2 | -0.455132235 | 0           |
| LINC00092 | ASPHD1   | -0.376978273 | 1.76E-16    |
| LINC00092 | C15orf48 | 0.00094421   | 0.984255851 |
| LINC00092 | DYSF     | -0.321437973 | 6.85E-12    |
| LINC00092 | PDZRN4   | -0.249748948 | 1.26E-07    |
| LINC00092 | EFHD2    | -0.246360176 | 1.88E-07    |
| LINC00092 | ASF1B    | -0.320280015 | 8.21E-12    |
| LINC00092 | AQP1     | -0.287179058 | 1.05E-09    |
| LINC00092 | ARRDC2   | -0.32323434  | 5.16E-12    |
| LINC00092 | PRSS1    | -0.363352921 | 3.79E-15    |
| LINC00092 | MAPK13   | -0.494026671 | 0           |
| LINC00092 | CST5     | -0.248161189 | 1.38E-07    |
| LINC00092 | AHR      | -0.387378197 | 0           |
| LINC00092 | BAX      | -0.220511635 | 3.28E-06    |
| LINC00092 | C1orf115 | -0.435268937 | 0           |
| LINC00092 | PLK3     | -0.395652976 | 0           |
| LINC00092 | JAG2     | -0.347030072 | 9.78E-14    |
| LINC00092 | RAD23B   | -0.522282046 | 0           |
| LINC00092 | CA12     | -0.186226764 | 8.91E-05    |
| LINC00092 | ADTRP    | -0.314202577 | 2.10E-11    |
| LINC00092 | UCP2     | -0.230777523 | 1.09E-06    |
| LINC00092 | IGFBP2   | -0.341751178 | 2.45E-13    |
| LINC00092 | LOXL2    | -0.249758026 | 1.26E-07    |
| LINC00092 | GPX1     | -0.302407543 | 1.22E-10    |
| LINC00092 | P3H3     | -0.3741577   | 3.92E-16    |
| LINC00092 | C2orf81  | -0.384118213 | 0           |
| LINC00092 | CDT1     | -0.360962308 | 7.33E-15    |
| LINC00092 | SNX25    | -0.395373982 | 0           |
| LINC00092 | MTHFD1L  | -0.449906813 | 0           |
| LINC00092 | CDC42BPG | -0.41219666  | 1.95E-19    |
| LINC00092 | MSN      | -0.589550008 | 0           |
| LINC00092 | SIGLEC6  | -0.32053859  | 6.02E-12    |
| LINC00092 | F2R      | -0.171758951 | 0.00030572  |
| LINC00092 | TMEM184A | -0.434507556 | 0           |
| LINC00092 | CKS2     | -0.229178735 | 1.30E-06    |

|           |          |              |             |
|-----------|----------|--------------|-------------|
| LINC00092 | TAX1BP3  | -0.337763427 | 4.83E-13    |
| LINC00092 | PMEPA1   | -0.323911755 | 4.63E-12    |
| LINC00092 | CXCL16   | -0.276320149 | 4.54E-09    |
| LINC00092 | FAXC     | -0.478523589 | 0           |
| LINC00092 | VTCN1    | -0.240605683 | 3.36E-07    |
| LINC00092 | SH2D4A   | -0.453725352 | 0           |
| LINC00092 | RNF24    | -0.496866534 | 0           |
| LINC00092 | LY6G6C   | -0.311836774 | 2.35E-11    |
| LINC00092 | NID1     | -0.293052817 | 4.65E-10    |
| LINC00092 | STAC     | -0.327321803 | 2.69E-12    |
| LINC00092 | RAB34    | -0.460052849 | 0           |
| LINC00092 | HES4     | -0.206054034 | 1.41E-05    |
| LINC00092 | EPHA10   | -0.394654017 | 0           |
| LINC00092 | ENTPD2   | -0.484898317 | 0           |
| LINC00092 | DDB2     | -0.321037992 | 7.29E-12    |
| LINC00092 | NKAIN4   | -0.295607446 | 3.24E-10    |
| LINC00092 | TRIM29   | -0.278837758 | 3.25E-09    |
| LINC00092 | ADCY8    | -0.454730771 | 8.66E-24    |
| LINC00092 | SFTA2    | -0.182067957 | 0.000128229 |
| LINC00092 | NRIP1    | -0.413547857 | 0           |
| LINC00092 | VWA1     | -0.170083996 | 0.0003505   |
| LINC00092 | APLNR    | -0.136619369 | 0.004160544 |
| LINC00092 | REN      | -0.418408345 | 4.93E-20    |
| LINC00092 | EDIL3    | -0.324070045 | 4.52E-12    |
| LINC00092 | AGR      | -0.422057801 | 0           |
| LINC00092 | TREM1    | -0.351471844 | 4.41E-14    |
| LINC00092 | SRL      | -0.32251707  | 5.78E-12    |
| LINC00092 | RASGRF1  | -0.449828661 | 0           |
| LINC00092 | RMI2     | -0.333961199 | 9.11E-13    |
| LINC00092 | SAMD1    | -0.346982841 | 9.86E-14    |
| LINC00092 | MGAT4B   | -0.516653239 | 0           |
| LINC00092 | NXN      | -0.331195375 | 1.44E-12    |
| LINC00092 | SH3BGRL3 | -0.241907482 | 3.15E-07    |
| LINC00092 | CA11     | -0.457202064 | 0           |
| LINC00092 | PLD3     | -0.458468386 | 0           |
| LINC00092 | LURAP1L  | -0.384478905 | 0           |
| LINC00092 | CARNS1   | -0.354138524 | 2.70E-14    |
| LINC00092 | PDLIM7   | -0.379014771 | 8.74E-17    |
| LINC00092 | BCL2L1   | -0.321686188 | 6.58E-12    |
| LINC00092 | GGT6     | -0.356992429 | 1.58E-14    |
| LINC00092 | DPYSL3   | -0.206704641 | 1.32E-05    |
| LINC00092 | FYN      | -0.45788274  | 0           |
| LINC00092 | TK1      | -0.235082847 | 6.81E-07    |
| LINC00092 | AK1      | -0.362536133 | 5.35E-15    |
| LINC00092 | HIGD1B   | -0.293931215 | 4.11E-10    |
| LINC00092 | TMEM59L  | -0.213697495 | 6.60E-06    |
| LINC00092 | MEGF9    | -0.433565332 | 0           |
| LINC00092 | ZFP36L1  | -0.331469121 | 1.37E-12    |
| LINC00092 | ADRA1B   | -0.349928656 | 5.83E-14    |
| LINC00092 | EPHA4    | -0.358676461 | 1.15E-14    |
| LINC00092 | TCERG1L  | -0.166362615 | 0.000472771 |

|           |          |              |             |
|-----------|----------|--------------|-------------|
| LINC00092 | NGFR     | -0.265610169 | 1.81E-08    |
| LINC00092 | EBI3     | -0.194190209 | 4.34E-05    |
| LINC00092 | S100A10  | -0.171407336 | 0.000314652 |
| LINC00092 | S100B    | -0.082642539 | 0.083706586 |
| LINC00092 | CD44     | -0.46859343  | 0           |
| LINC00092 | BHLHE41  | -0.379299013 | 7.83E-17    |
| LINC00092 | FBXO2    | -0.365256427 | 3.06E-15    |
| LINC00092 | SLC30A2  | -0.128366433 | 0.007113655 |
| LINC00092 | FRMD5    | -0.302721713 | 1.16E-10    |
| LINC00092 | SAMD11   | -0.23212611  | 9.44E-07    |
| LINC00092 | SIPA1L2  | -0.470797153 | 0           |
| LINC00092 | S100A16  | -0.275942862 | 4.77E-09    |
| LINC00092 | PPL      | -0.37548331  | 2.73E-16    |
| LINC00092 | ARHGDIB  | -0.227966027 | 1.49E-06    |
| LINC00092 | CDC42EP3 | -0.265173311 | 1.91E-08    |
| LINC00092 | RUNX2    | -0.385723951 | 0           |
| LINC00092 | LAMC2    | -0.311776595 | 3.03E-11    |
| LINC00092 | BRINP1   | -0.498457379 | 0           |
| LINC00092 | GPRC5B   | -0.445094846 | 0           |
| LINC00092 | AQP5     | -0.132936851 | 0.005304322 |
| LINC00092 | PLAG1    | -0.553994701 | 0           |
| LINC00092 | PTPRU    | -0.341276165 | 2.66E-13    |
| LINC00092 | ANGPTL4  | -0.217491497 | 4.48E-06    |
| LINC00092 | PALM3    | -0.288324535 | 8.99E-10    |
| LINC00092 | ACP5     | -0.105846527 | 0.026619734 |
| LINC00092 | DLG4     | -0.538313471 | 0           |
| LINC00092 | ETNK2    | -0.434615494 | 0           |
| LINC00092 | CD109    | -0.388351058 | 0           |
| LINC00092 | SNX22    | -0.260778771 | 3.32E-08    |
| LINC00092 | TMEM98   | -0.332765087 | 1.11E-12    |
| LINC00092 | CTHRC1   | -0.092612697 | 0.052516021 |
| LINC00092 | S100A2   | -0.150297007 | 0.001604852 |
| LINC00092 | C11orf80 | -0.361381721 | 6.74E-15    |
| LINC00092 | SREBF1   | -0.339341649 | 3.70E-13    |
| LINC00092 | PRSS22   | -0.399130822 | 0           |
| LINC00092 | CMTM3    | -0.249869226 | 1.24E-07    |
| LINC00092 | RDH5     | -0.476090231 | 0           |
| LINC00092 | MYH10    | -0.460173268 | 0           |
| LINC00092 | EVPL     | -0.382495029 | 1.11E-17    |
| LINC00092 | SCD      | -0.336979919 | 5.51E-13    |
| LINC00092 | CD151    | -0.44555681  | 0           |
| LINC00092 | S100A4   | -0.317462704 | 1.27E-11    |
| LINC00092 | BNIP1    | -0.405758446 | 0           |
| LINC00092 | MAP3K6   | -0.377269181 | 1.60E-16    |
| LINC00092 | MANEAL   | -0.496548819 | 0           |
| LINC00092 | CD207    | -0.187642999 | 7.64E-05    |
| LINC00092 | CD1A     | -0.180384799 | 0.000144742 |
| LINC00092 | C3       | -0.153409906 | 0.00127762  |
| LINC00092 | NT5E     | -0.293400744 | 4.43E-10    |
| LINC00092 | CACNG4   | -0.292237319 | 4.31E-10    |
| LINC00092 | FHOD1    | -0.344516435 | 1.52E-13    |

|           |          |              |             |
|-----------|----------|--------------|-------------|
| LINC00092 | LEMD1    | -0.38186896  | 2.00E-17    |
| LINC00092 | ATP11A   | -0.310869263 | 3.47E-11    |
| LINC00092 | PPAP2C   | -0.37712933  | 1.67E-16    |
| LINC00092 | DRAM1    | -0.282416451 | 2.01E-09    |
| LINC00092 | CDA      | -0.288432473 | 8.85E-10    |
| LINC00092 | CCND2    | -0.509879098 | 0           |
| LINC00092 | LCN6     | -0.243914841 | 2.29E-07    |
| LINC00092 | CDH4     | -0.382972878 | 5.25E-18    |
| LINC00092 | MMP11    | -0.240219195 | 3.82E-07    |
| LINC00092 | B3GAT1   | -0.334512236 | 8.32E-13    |
| LINC00092 | SPP1     | -0.106807899 | 0.025268461 |
| LINC00092 | HLA-DQB1 | -0.129270645 | 0.006717035 |
| LINC00092 | SDC3     | -0.45000695  | 0           |
| LINC00092 | CX3CL1   | -0.194418709 | 4.25E-05    |
| LINC00092 | SDK1     | -0.295478516 | 3.30E-10    |
| LINC00092 | DOCK9    | -0.517825807 | 0           |
| LINC00092 | CSF2     | -0.325348275 | 2.78E-12    |
| LINC00092 | GRHL3    | -0.394495443 | 0           |
| LINC00092 | TMEM92   | -0.339950889 | 2.45E-13    |
| LINC00092 | BASP1    | -0.315430603 | 1.74E-11    |
| LINC00092 | HRH1     | -0.283458386 | 1.75E-09    |
| LINC00092 | ESM1     | -0.179426666 | 0.000160929 |
| LINC00092 | B4GALNT3 | -0.40139894  | 0           |
| LINC00092 | LMO3     | -0.3574195   | 1.46E-14    |
| LINC00092 | C9orf16  | -0.335267803 | 7.33E-13    |
| LINC00092 | SEMA3F   | -0.436879356 | 0           |
| LINC00092 | PLA2G12B | -0.485956525 | 2.13E-27    |
| LINC00092 | KLK6     | -0.322231604 | 4.59E-12    |
| LINC00092 | ST3GAL5  | -0.583109042 | 0           |
| LINC00092 | FAM132B  | -0.345881617 | 1.20E-13    |
| LINC00092 | CDKN1A   | -0.207669985 | 1.20E-05    |
| LINC00092 | E2F1     | -0.386319241 | 0           |
| LINC00092 | B3GNT8   | -0.40118278  | 0           |
| LINC00092 | MTMR11   | -0.372829254 | 5.52E-16    |
| LINC00092 | MYO1G    | -0.152612924 | 0.001354972 |
| LINC00092 | TMSB10   | -0.213091284 | 7.01E-06    |
| LINC00092 | UNC5CL   | -0.333631995 | 9.62E-13    |
| LINC00092 | ABR      | -0.416529416 | 0           |
| LINC00092 | PLP2     | -0.411028972 | 0           |
| LINC00092 | SRCIN1   | -0.514119745 | 0           |
| LINC00092 | PDE9A    | -0.34525881  | 1.34E-13    |
| LINC00092 | TREM2    | -0.114510931 | 0.016421433 |
| LINC00092 | KDEL3    | -0.30836598  | 5.06E-11    |
| LINC00092 | PC       | -0.476223416 | 0           |
| LINC00092 | C2CD4A   | -0.276065977 | 4.70E-09    |
| LINC00092 | PELI1    | -0.293731508 | 4.22E-10    |
| LINC00092 | SSX1     | -0.303484938 | 1.04E-10    |
| LINC00092 | MROH6    | -0.463264041 | 0           |
| LINC00092 | ESPN     | -0.4291081   | 0           |
| LINC00092 | BMP1     | -0.453740103 | 0           |
| LINC00092 | TM4SF4   | -0.440078379 | 3.21E-22    |



|           |          |              |             |
|-----------|----------|--------------|-------------|
| LINC00092 | CORO2A   | -0.471646616 | 0           |
| LINC00092 | CD164L2  | -0.389755118 | 2.24E-17    |
| LINC00092 | CTSS     | -0.202108125 | 2.06E-05    |
| LINC00092 | CLU      | -0.349656754 | 6.12E-14    |
| LINC00092 | TMSB4X   | -0.28663256  | 1.13E-09    |
| LINC00092 | WNT10A   | -0.253657067 | 7.13E-08    |
| LINC00092 | NAPSA    | -0.184096086 | 0.000107477 |
| LINC00092 | PLEKHA4  | -0.374921068 | 3.19E-16    |
| LINC00092 | SFTPA1   | -0.157324982 | 0.000941172 |
| LINC00092 | C1orf116 | -0.400870454 | 0           |
| LINC00092 | TM4SF1   | -0.248988559 | 1.38E-07    |
| LINC00092 | SEL1L3   | -0.250537279 | 1.15E-07    |
| LINC00092 | VASN     | -0.368096574 | 1.67E-15    |
| LINC00092 | NPTXR    | -0.483589444 | 0           |
| LINC00092 | PDE4C    | -0.430080251 | 0           |
| LINC00092 | CDC42EP1 | -0.362354156 | 5.55E-15    |
| LINC00092 | ENDOD1   | -0.526262989 | 0           |
| LINC00092 | RYR1     | -0.485738276 | 0           |
| LINC00092 | IL1RAP   | -0.505603985 | 0           |
| LINC00092 | SLC35F2  | -0.481652249 | 7.05E-27    |
| LINC00092 | ISYNA1   | -0.413176953 | 0           |
| LINC00092 | HLA-G    | -0.19561936  | 3.80E-05    |
| LINC00092 | CDKN2B   | -0.367185554 | 2.03E-15    |
| LINC00092 | ALDH1A3  | -0.29015778  | 6.97E-10    |
| LINC00092 | CLIP3    | -0.419469274 | 0           |
| LINC00092 | ULBP2    | -0.406336432 | 0           |
| LINC00092 | ETHE1    | -0.288249077 | 9.08E-10    |
| LINC00092 | XPR1     | -0.40217564  | 0           |
| LINC00092 | SPTBN2   | -0.495617658 | 0           |
| LINC00092 | IVL      | -0.326702566 | 2.23E-12    |
| LINC00092 | MARCO    | -0.147863649 | 0.001912424 |
| LINC00092 | PLXND1   | -0.35699172  | 1.58E-14    |
| LINC00092 | EMILIN2  | -0.3969071   | 0           |
| LINC00092 | PLAUR    | -0.229181855 | 1.30E-06    |
| LINC00092 | CDC42EP5 | -0.332894158 | 1.09E-12    |
| LINC00092 | TRPC5    | -0.481726087 | 6.91E-27    |
| LINC00092 | TMEM100  | -0.319186309 | 9.73E-12    |
| LINC00092 | QSOX1    | -0.401688146 | 0           |
| LINC00092 | ARHGAP23 | -0.495805025 | 0           |
| LINC00092 | MDFI     | -0.2197338   | 3.55E-06    |
| LINC00092 | FSTL3    | -0.348651696 | 7.33E-14    |
| LINC00092 | INF2     | -0.459220265 | 0           |
| LINC00092 | TGFBR1   | -0.448675383 | 0           |
| LINC00092 | TGFBI    | -0.13132161  | 0.005889958 |
| LINC00092 | ERBB3    | -0.403903358 | 0           |
| LINC00092 | CCL18    | -0.168340818 | 0.000403549 |
| LINC00092 | CCL17    | -0.138653956 | 0.003603748 |
| LINC00092 | C16orf45 | -0.451169022 | 0           |
| LINC00092 | PRDM1    | -0.410177807 | 0           |
| LINC00092 | TRIM47   | -0.374846745 | 3.26E-16    |
| LINC00092 | CNFN     | -0.240895758 | 3.54E-07    |

|           |           |              |             |
|-----------|-----------|--------------|-------------|
| LINC00092 | ARMCX3    | -0.442354979 | 0           |
| LINC00092 | RAMP1     | -0.309522519 | 4.25E-11    |
| LINC00092 | GABRD     | -0.234702724 | 7.10E-07    |
| LINC00092 | COL13A1   | -0.259548759 | 3.86E-08    |
| LINC00092 | S100A5    | -0.350749751 | 5.03E-14    |
| LINC00092 | MISP      | -0.255441865 | 6.38E-08    |
| LINC00092 | HES6      | -0.407327306 | 0           |
| LINC00092 | PSD3      | -0.548398091 | 0           |
| LINC00092 | DOK7      | -0.429905366 | 0           |
| LINC00092 | ZMAT3     | -0.468091326 | 0           |
| LINC00092 | MFAP2     | -0.319457927 | 9.33E-12    |
| LINC00092 | TMEM79    | -0.42175271  | 0           |
| LINC00092 | SLC1A5    | -0.285016893 | 1.41E-09    |
| LINC00092 | BBC3      | -0.318549744 | 1.07E-11    |
| LINC00092 | HLA-DQB2  | -0.094845213 | 0.047058099 |
| LINC00092 | C1QL1     | -0.419539909 | 0           |
| LINC00092 | TMEM215   | -0.362219263 | 4.68E-15    |
| LINC00092 | PNP       | -0.279645521 | 2.92E-09    |
| LINC00092 | ARNTL     | -0.317773044 | 1.21E-11    |
| LINC00092 | CLDN2     | -0.366078316 | 2.28E-15    |
| LINC00092 | MVP       | -0.36565811  | 2.81E-15    |
| LINC00092 | LGALS1    | -0.26426683  | 2.15E-08    |
| LINC00092 | BIRC7     | -0.472542652 | 8.40E-26    |
| LINC00092 | COL8A1    | -0.472901449 | 0           |
| LINC00092 | PERP      | -0.393596479 | 0           |
| LINC00092 | GJA4      | -0.283004649 | 1.86E-09    |
| LINC00092 | IGFL2     | -0.285302156 | 1.15E-09    |
| LINC00092 | DAPK2     | -0.396457476 | 0           |
| LINC00092 | MAMLD1    | -0.406032191 | 0           |
| LINC00092 | ETV5      | -0.578009429 | 0           |
| LINC00092 | RUNX1     | -0.384130127 | 0           |
| LINC00092 | LONRF2    | -0.386873683 | 0           |
| LINC00092 | SPOCK1    | -0.340432802 | 3.07E-13    |
| LINC00092 | XKRX      | -0.445281079 | 0           |
| LINC00092 | TGFB1     | -0.297629618 | 2.43E-10    |
| LINC00092 | ERP27     | -0.132054199 | 0.005617498 |
| LINC00092 | TNFRSF10C | -0.403951724 | 0           |
| LINC00092 | PALM      | -0.405732064 | 0           |
| LINC00092 | TSC22D1   | -0.447909604 | 0           |
| LINC00092 | TGM2      | -0.251395961 | 1.04E-07    |
| LINC00092 | UBE2QL1   | -0.416293399 | 0           |
| LINC00092 | ECE1      | -0.513547857 | 0           |
| LINC00092 | COL8A2    | -0.31336815  | 2.38E-11    |
| LINC00092 | HIST3H2A  | -0.30493806  | 8.40E-11    |
| LINC00092 | TNFRSF21  | -0.337135089 | 5.37E-13    |
| LINC00092 | SOX4      | -0.318263233 | 1.12E-11    |
| LINC00092 | ELF3      | -0.325510401 | 3.59E-12    |
| LINC00092 | TPD52L1   | -0.505269249 | 0           |
| LINC00092 | INHBB     | -0.386087338 | 0           |
| LINC00092 | HPN       | -0.474460522 | 0           |
| LINC00092 | MMP7      | -0.167793092 | 0.000414469 |

|           |            |              |             |
|-----------|------------|--------------|-------------|
| LINC00092 | RAB27A     | -0.587646128 | 0           |
| LINC00092 | IGF2BP2    | -0.570637019 | 0           |
| LINC00092 | ITGB4      | -0.330911133 | 1.50E-12    |
| LINC00092 | PPP1R1B    | -0.391174185 | 0           |
| LINC00092 | NPDC1      | -0.444416723 | 0           |
| LINC00092 | CCL13      | -0.249356077 | 1.20E-07    |
| LINC00092 | SPINT1     | -0.444515158 | 0           |
| LINC00092 | HEY2       | -0.465054451 | 0           |
| LINC00092 | CST2       | -0.213692211 | 6.28E-06    |
| LINC00092 | ADM        | -0.482059305 | 0           |
| LINC00092 | VSTM2L     | -0.294485089 | 3.80E-10    |
| LINC00092 | FAM84A     | -0.344689334 | 1.47E-13    |
| LINC00092 | P4HA2      | -0.567140734 | 0           |
| LINC00092 | LPL        | -0.370620282 | 9.40E-16    |
| LINC00092 | TMEM173    | -0.384821016 | 0           |
| LINC00092 | DHRS3      | -0.466923723 | 0           |
| LINC00092 | SCN1B      | -0.4601927   | 0           |
| LINC00092 | GLT1D1     | -0.536194567 | 0           |
| LINC00092 | PHYHIP     | -0.441817841 | 0           |
| LINC00092 | BHLHE40    | -0.373861261 | 4.24E-16    |
| LINC00092 | BID        | -0.468865189 | 0           |
| LINC00092 | POSTN      | -0.120909914 | 0.011269564 |
| LINC00092 | ITGA3      | -0.454528434 | 0           |
| LINC00092 | RSPO4      | -0.363323896 | 4.56E-15    |
| LINC00092 | ADAMTS9    | -0.454445743 | 0           |
| LINC00092 | ABTB2      | -0.429401135 | 0           |
| LINC00092 | KCNQ3      | -0.431368842 | 0           |
| LINC00092 | ANXA1      | -0.487289265 | 0           |
| LINC00092 | S100A11    | -0.330318822 | 1.66E-12    |
| LINC00092 | CEACAM6    | -0.285963312 | 1.04E-09    |
| LINC00092 | IER5L      | -0.421697961 | 0           |
| LINC00092 | KRT80      | -0.382511134 | 1.08E-17    |
| LINC00092 | CDH6       | -0.304910543 | 8.44E-11    |
| LINC00092 | UNC5B      | -0.466118372 | 0           |
| LINC00092 | PLEKHN1    | -0.428263176 | 0           |
| LINC00092 | SYTL1      | -0.315866043 | 1.63E-11    |
| LINC00092 | TMEM163    | -0.270485679 | 9.72E-09    |
| LINC00092 | C4orf48    | -0.2773679   | 3.96E-09    |
| LINC00092 | B3GNT7     | -0.427505198 | 0           |
| LINC00092 | BAIAP3     | -0.475101059 | 0           |
| LINC00092 | PHLDA2     | -0.419058939 | 0           |
| LINC00092 | GAP43      | -0.362618139 | 4.34E-15    |
| LINC00092 | S100A1     | -0.375009858 | 3.12E-16    |
| LINC00092 | PTPRE      | -0.473578154 | 0           |
| LINC00092 | CCND1      | -0.54596062  | 0           |
| LINC00092 | ST6GALNAC5 | -0.275089198 | 4.61E-09    |
| LINC00092 | KRT17      | -0.163773946 | 0.000580083 |
| LINC00092 | HPCAL4     | -0.468933129 | 0           |
| LINC00092 | GABBR2     | -0.275346012 | 5.16E-09    |
| LINC00092 | DIRAS3     | -0.419276092 | 0           |
| LINC00092 | SERINC2    | -0.496962558 | 0           |

|           |         |              |             |
|-----------|---------|--------------|-------------|
| LINC00092 | PTCHD4  | -0.355363429 | 2.15E-14    |
| LINC00092 | EPS8    | -0.587730521 | 0           |
| LINC00092 | LY6E    | -0.3691856   | 1.31E-15    |
| LINC00092 | UPP1    | -0.412890158 | 0           |
| LINC00092 | AHNAK2  | -0.431295796 | 0           |
| LINC00092 | PLXNC1  | -0.427824616 | 0           |
| LINC00092 | TNC     | -0.357342625 | 1.48E-14    |
| LINC00092 | DUSP4   | -0.536713407 | 0           |
| LINC00092 | NRCAM   | -0.53114715  | 0           |
| LINC00092 | NRP2    | -0.418698247 | 0           |
| LINC00092 | CTSC    | -0.342026058 | 2.34E-13    |
| LINC00092 | AMIGO2  | -0.46909837  | 0           |
| LINC00092 | NAB2    | -0.501737221 | 0           |
| LINC00092 | TBC1D2  | -0.422018087 | 0           |
| LINC00092 | PHLDA3  | -0.310150716 | 3.87E-11    |
| LINC00092 | PTP4A3  | -0.312843494 | 2.58E-11    |
| LINC00092 | CRABP2  | -0.289968002 | 7.15E-10    |
| LINC00092 | GOS2    | -0.35458914  | 2.48E-14    |
| LINC00092 | S100A6  | -0.350331615 | 5.42E-14    |
| LINC00092 | FOXQ1   | -0.272151981 | 7.84E-09    |
| LINC00092 | LRG1    | -0.370024283 | 1.08E-15    |
| LINC00092 | LAMP5   | -0.17975431  | 0.000156485 |
| LINC00092 | ALDH3B1 | -0.470339019 | 0           |
| LINC00092 | CDH2    | -0.317192362 | 1.33E-11    |
| LINC00092 | SCG5    | -0.374309466 | 3.77E-16    |
| LINC00092 | ZCCHC16 | -0.46878827  | 2.28E-25    |
| LINC00092 | GRB7    | -0.436891838 | 0           |
| LINC00092 | TIAM1   | -0.362462661 | 5.43E-15    |
| LINC00092 | FXYS5   | -0.351118244 | 4.70E-14    |
| LINC00092 | CLDN9   | -0.431190411 | 0           |
| LINC00092 | FAM43A  | -0.488833872 | 0           |
| LINC00092 | CHST2   | -0.447319704 | 0           |
| LINC00092 | HMGA2   | -0.531019213 | 0           |
| LINC00092 | GALNT7  | -0.605076067 | 0           |
| LINC00092 | CBLN1   | -0.237037505 | 5.47E-07    |
| LINC00092 | STRA6   | -0.409090058 | 0           |
| LINC00092 | MUC21   | -0.414637511 | 1.14E-19    |
| LINC00092 | PRR36   | -0.45995186  | 0           |
| LINC00092 | NFE2L3  | -0.251871257 | 9.81E-08    |
| LINC00092 | NR1D1   | -0.310190714 | 3.85E-11    |
| LINC00092 | MUC1    | -0.240271817 | 3.80E-07    |
| LINC00092 | NAT8L   | -0.474609451 | 0           |
| LINC00092 | APOC1   | -0.251396528 | 1.04E-07    |
| LINC00092 | EVA1A   | -0.389748012 | 0           |
| LINC00092 | ENTPD1  | -0.499598175 | 0           |
| LINC00092 | COL1A1  | -0.179136184 | 0.000164968 |
| LINC00092 | FNDC4   | -0.308785534 | 4.75E-11    |
| LINC00092 | FRMD3   | -0.436916092 | 0           |
| LINC00092 | SHROOM4 | -0.48717764  | 0           |
| LINC00092 | NELL2   | -0.415701796 | 0           |
| LINC00092 | EPHB3   | -0.440787111 | 0           |

|           |           |              |             |
|-----------|-----------|--------------|-------------|
| LINC00092 | TMC6      | -0.512174448 | 0           |
| LINC00092 | NOD1      | -0.446783276 | 0           |
| LINC00092 | GGCT      | -0.4672725   | 0           |
| LINC00092 | ICAM1     | -0.364211088 | 3.80E-15    |
| LINC00092 | PRSS23    | -0.410428008 | 0           |
| LINC00092 | CFI       | -0.307618923 | 5.65E-11    |
| LINC00092 | CD55      | -0.39973519  | 0           |
| LINC00092 | RASD2     | -0.417491639 | 0           |
| LINC00092 | KLK11     | -0.309820664 | 3.20E-11    |
| LINC00092 | ICAM5     | -0.434004743 | 0           |
| LINC00092 | ADORA1    | -0.402212517 | 0           |
| LINC00092 | ITGA2     | -0.365546059 | 2.88E-15    |
| LINC00092 | ABCC3     | -0.481595639 | 0           |
| LINC00092 | MFGE8     | -0.432454605 | 0           |
| LINC00092 | STK32A    | -0.498482059 | 0           |
| LINC00092 | CYSLTR2   | -0.361601143 | 6.45E-15    |
| LINC00092 | LAD1      | -0.51334035  | 0           |
| LINC00092 | MGAT3     | -0.312064099 | 2.90E-11    |
| LINC00092 | IGFBP6    | -0.336453419 | 6.02E-13    |
| LINC00092 | CYP2S1    | -0.348483052 | 7.55E-14    |
| LINC00092 | KCNJ2     | -0.403394163 | 0           |
| LINC00092 | FAM20A    | -0.273409793 | 6.65E-09    |
| LINC00092 | TGFA      | -0.589555823 | 0           |
| LINC00092 | MXRA8     | -0.363299784 | 4.59E-15    |
| LINC00092 | C8orf4    | -0.299786677 | 1.78E-10    |
| LINC00092 | CLDN10    | -0.330865082 | 1.13E-12    |
| LINC00092 | PDE5A     | -0.540955755 | 0           |
| LINC00092 | APOE      | -0.300429341 | 1.62E-10    |
| LINC00092 | SPOCK2    | -0.361023866 | 7.24E-15    |
| LINC00092 | TENM1     | -0.430408746 | 0           |
| LINC00092 | SLIT1     | -0.446768666 | 0           |
| LINC00092 | CXCL14    | -0.11288179  | 0.018024851 |
| LINC00092 | ECM1      | -0.313419211 | 2.36E-11    |
| LINC00092 | DUSP5     | -0.439622061 | 0           |
| LINC00092 | SEZ6L2    | -0.390907247 | 0           |
| LINC00092 | THRSP     | -0.440631516 | 0           |
| LINC00092 | C19orf33  | -0.323583685 | 4.88E-12    |
| LINC00092 | MPZL2     | -0.472522885 | 0           |
| LINC00092 | CTSH      | -0.522272259 | 0           |
| LINC00092 | CYP1B1    | -0.454337663 | 0           |
| LINC00092 | ALOX5     | -0.17778632  | 0.000185018 |
| LINC00092 | SYTL5     | -0.488547024 | 1.03E-27    |
| LINC00092 | TNFRSF12A | -0.459911295 | 0           |
| LINC00092 | DUSP6     | -0.470556172 | 0           |
| LINC00092 | ALOX15B   | -0.307191143 | 6.02E-11    |
| LINC00092 | SDC4      | -0.499573212 | 0           |
| LINC00092 | MDK       | -0.283976801 | 1.63E-09    |
| LINC00092 | KRT19     | -0.36282775  | 5.05E-15    |
| LINC00092 | MET       | -0.546661438 | 0           |
| LINC00092 | TESC      | -0.466835075 | 0           |
| LINC00092 | CXCL17    | -0.296542589 | 2.32E-10    |

|           |          |              |          |
|-----------|----------|--------------|----------|
| LINC00092 | NPC2     | -0.476873314 | 0        |
| LINC00092 | COMP     | -0.261113223 | 3.18E-08 |
| LINC00092 | TUSC3    | -0.47100225  | 0        |
| LINC00092 | TMPRSS4  | -0.352426124 | 3.70E-14 |
| LINC00092 | LGALS3   | -0.460913091 | 0        |
| LINC00092 | CRLF1    | -0.262633575 | 2.63E-08 |
| LINC00092 | CTXN1    | -0.321243514 | 7.06E-12 |
| LINC00092 | PCSK1N   | -0.261524692 | 3.02E-08 |
| LINC00092 | NMU      | -0.325683347 | 2.63E-12 |
| LINC00092 | GALE     | -0.566595795 | 0        |
| LINC00092 | PCSK2    | -0.235799408 | 6.29E-07 |
| LINC00092 | GJB3     | -0.481217076 | 0        |
| LINC00092 | SLPI     | -0.266522324 | 1.61E-08 |
| LINC00092 | AGR2     | -0.365881787 | 2.68E-15 |
| LINC00092 | MRC2     | -0.378217788 | 1.17E-16 |
| LINC00092 | GOLT1A   | -0.502938724 | 0        |
| LINC00092 | SLC27A6  | -0.30490332  | 6.74E-11 |
| LINC00092 | KCNN4    | -0.348800058 | 7.14E-14 |
| LINC00092 | ETV4     | -0.461502369 | 1.53E-24 |
| LINC00092 | SYT12    | -0.476621127 | 0        |
| LINC00092 | PVRL4    | -0.428597202 | 0        |
| LINC00092 | PLCD3    | -0.516926418 | 0        |
| LINC00092 | PLAU     | -0.334328841 | 8.57E-13 |
| LINC00092 | LRRK2    | -0.574400951 | 0        |
| LINC00092 | SFN      | -0.260527861 | 3.42E-08 |
| LINC00092 | LPAR5    | -0.496778595 | 0        |
| LINC00092 | NGEF     | -0.367095913 | 2.07E-15 |
| LINC00092 | DTX4     | -0.373184556 | 5.04E-16 |
| LINC00092 | CST6     | -0.330035715 | 1.73E-12 |
| LINC00092 | QPCT     | -0.458738444 | 0        |
| LINC00092 | TIMP1    | -0.422988537 | 0        |
| LINC00092 | CAMK2N1  | -0.501951821 | 0        |
| LINC00092 | KLHDC8A  | -0.301544039 | 1.38E-10 |
| LINC00092 | PDLIM4   | -0.412494291 | 0        |
| LINC00092 | SCEL     | -0.472218645 | 0        |
| LINC00092 | LCN2     | -0.339553128 | 3.57E-13 |
| LINC00092 | PROS1    | -0.515077287 | 0        |
| LINC00092 | GABRB2   | -0.4715157   | 0        |
| LINC00092 | TMPRSS6  | -0.312900087 | 2.56E-11 |
| LINC00092 | KLK7     | -0.352996301 | 2.50E-14 |
| LINC00092 | PDZK1IP1 | -0.327589166 | 2.58E-12 |
| LINC00092 | CDH3     | -0.472300059 | 0        |
| LINC00092 | LRP4     | -0.533216129 | 0        |
| LINC00092 | IGSF1    | -0.289412993 | 7.73E-10 |
| LINC00092 | B3GNT3   | -0.387030129 | 0        |
| LINC00092 | CLDN1    | -0.501067892 | 0        |
| LINC00092 | GDF15    | -0.443241461 | 0        |
| LINC00092 | ARHGAP36 | -0.256011721 | 5.34E-08 |
| LINC00092 | LAMB3    | -0.422721174 | 0        |
| LINC00092 | KLK10    | -0.32707217  | 2.80E-12 |
| LINC00092 | DPP4     | -0.45880142  | 0        |

|              |           |              |            |
|--------------|-----------|--------------|------------|
| LINC00092    | METTL7B   | -0.59122326  | 0          |
| LINC00092    | LIPH      | -0.502815325 | 0          |
| LINC00092    | CLDN16    | -0.505988931 | 0          |
| LINC00092    | CHI3L1    | -0.37883407  | 9.36E-17   |
| LINC00092    | SLC22A31  | -0.370647221 | 9.62E-16   |
| LINC00092    | TACSTD2   | -0.371180539 | 8.24E-16   |
| LINC00092    | SFTPB     | -0.181236508 | 0.00013778 |
| LINC00092    | RXRG      | -0.444749615 | 0          |
| LINC00092    | DCSTAMP   | -0.4127277   | 1.74E-19   |
| LINC00092    | CITED1    | -0.460544456 | 0          |
| LINC00092    | SERPINA1  | -0.423252637 | 0          |
| LINC00092    | PRR15     | -0.457581195 | 0          |
| LINC00092    | SLC34A2   | -0.420009815 | 0          |
| LINC00092    | FN1       | -0.432821254 | 0          |
| LINC00092    | ZCCHC12   | -0.462209198 | 0          |
| RP11-423H2.3 | TFF3      | 0.681839174  | 0          |
| RP11-423H2.3 | CCL21     | 0.396299326  | 5.83E-18   |
| RP11-423H2.3 | TPO       | 0.72380566   | 0          |
| RP11-423H2.3 | MT1G      | 0.698931825  | 0          |
| RP11-423H2.3 | DIO1      | 0.634083037  | 0          |
| RP11-423H2.3 | DPT       | 0.322162024  | 4.64E-12   |
| RP11-423H2.3 | CDH16     | 0.633410162  | 0          |
| RP11-423H2.3 | CRABP1    | 0.583873958  | 1.79E-41   |
| RP11-423H2.3 | SLC26A7   | 0.674569453  | 0          |
| RP11-423H2.3 | MT1H      | 0.662379497  | 8.92E-57   |
| RP11-423H2.3 | SLC26A4   | 0.63680475   | 0          |
| RP11-423H2.3 | SLC5A8    | 0.66225046   | 9.53E-57   |
| RP11-423H2.3 | PKHD1L1   | 0.636949224  | 2.49E-51   |
| RP11-423H2.3 | TFCP2L1   | 0.688055753  | 0          |
| RP11-423H2.3 | WSCD2     | 0.635740072  | 4.38E-51   |
| RP11-423H2.3 | IPCEF1    | 0.564619437  | 0          |
| RP11-423H2.3 | SLC5A5    | 0.558056171  | 2.66E-37   |
| RP11-423H2.3 | MT1F      | 0.736785602  | 0          |
| RP11-423H2.3 | FOSB      | 0.40373599   | 0          |
| RP11-423H2.3 | SEMA3D    | 0.59243613   | 6.10E-43   |
| RP11-423H2.3 | BMP8A     | 0.517719287  | 0          |
| RP11-423H2.3 | MATN2     | 0.651192708  | 0          |
| RP11-423H2.3 | PLA2R1    | 0.535815294  | 0          |
| RP11-423H2.3 | COL23A1   | 0.645638508  | 0          |
| RP11-423H2.3 | HGD       | 0.698777931  | 0          |
| RP11-423H2.3 | TCEAL2    | 0.468321953  | 0          |
| RP11-423H2.3 | CHRDL1    | 0.280164867  | 2.32E-09   |
| RP11-423H2.3 | TNFRSF11B | 0.51788935   | 0          |
| RP11-423H2.3 | FAM167A   | 0.605300879  | 0          |
| RP11-423H2.3 | KIT       | 0.50972563   | 0          |
| RP11-423H2.3 | SLC4A4    | 0.67128564   | 0          |
| RP11-423H2.3 | SMOC2     | 0.369375945  | 1.25E-15   |
| RP11-423H2.3 | FHL1      | 0.631571953  | 0          |
| RP11-423H2.3 | OTOS      | 0.67547948   | 0          |
| RP11-423H2.3 | IGFBPL1   | 0.604475189  | 4.43E-45   |
| RP11-423H2.3 | HBB       | 0.36347084   | 4.43E-15   |

|              |            |             |             |
|--------------|------------|-------------|-------------|
| RP11-423H2.3 | BEX1       | 0.464726808 | 0           |
| RP11-423H2.3 | FABP4      | 0.525980524 | 1.33E-32    |
| RP11-423H2.3 | LMOD1      | 0.552067702 | 0           |
| RP11-423H2.3 | SOD3       | 0.682676438 | 0           |
| RP11-423H2.3 | TMEM171    | 0.660835789 | 0           |
| RP11-423H2.3 | PI16       | 0.336328461 | 6.15E-13    |
| RP11-423H2.3 | ZMAT4      | 0.667500968 | 6.14E-58    |
| RP11-423H2.3 | MFAP4      | 0.184202748 | 0.000106478 |
| RP11-423H2.3 | CWH43      | 0.654752064 | 4.35E-55    |
| RP11-423H2.3 | SPX        | 0.640786969 | 0           |
| RP11-423H2.3 | APOD       | 0.196832919 | 3.40E-05    |
| RP11-423H2.3 | DPP6       | 0.580996661 | 0           |
| RP11-423H2.3 | MMRN1      | 0.38229901  | 1.37E-17    |
| RP11-423H2.3 | WDR72      | 0.544791741 | 0           |
| RP11-423H2.3 | MPPED2     | 0.664731204 | 0           |
| RP11-423H2.3 | PAPSS2     | 0.458563133 | 0           |
| RP11-423H2.3 | DCN        | 0.121695691 | 0.010747895 |
| RP11-423H2.3 | SORBS2     | 0.583153295 | 0           |
| RP11-423H2.3 | EGR2       | 0.31738441  | 1.29E-11    |
| RP11-423H2.3 | EDN3       | 0.493038291 | 2.86E-28    |
| RP11-423H2.3 | DI02       | 0.540550385 | 0           |
| RP11-423H2.3 | ITPR1      | 0.574254859 | 0           |
| RP11-423H2.3 | CFD        | 0.343234085 | 1.90E-13    |
| RP11-423H2.3 | CPXM1      | 0.386544762 | 0           |
| RP11-423H2.3 | ELM01      | 0.614594899 | 0           |
| RP11-423H2.3 | GPC3       | 0.493301759 | 2.66E-28    |
| RP11-423H2.3 | MYOC       | 0.213567724 | 6.36E-06    |
| RP11-423H2.3 | DEPTOR     | 0.615067217 | 0           |
| RP11-423H2.3 | DGKI       | 0.581807544 | 0           |
| RP11-423H2.3 | CARTPT     | 0.548533721 | 7.47E-36    |
| RP11-423H2.3 | IYD        | 0.562568897 | 0           |
| RP11-423H2.3 | LYVE1      | 0.371334716 | 7.94E-16    |
| RP11-423H2.3 | CLCNKB     | 0.64370229  | 0           |
| RP11-423H2.3 | NCAM1      | 0.541626361 | 0           |
| RP11-423H2.3 | HBA2       | 0.371132172 | 8.34E-16    |
| RP11-423H2.3 | GLT8D2     | 0.452070113 | 0           |
| RP11-423H2.3 | OGDHL      | 0.654276531 | 0           |
| RP11-423H2.3 | LIFR       | 0.533193435 | 0           |
| RP11-423H2.3 | CSGALNACT1 | 0.449991348 | 0           |
| RP11-423H2.3 | RAP1GAP    | 0.613838907 | 0           |
| RP11-423H2.3 | COL9A3     | 0.58646661  | 0           |
| RP11-423H2.3 | FBLN1      | 0.189365052 | 6.74E-05    |
| RP11-423H2.3 | EFEMP1     | 0.461682983 | 0           |
| RP11-423H2.3 | AOX1       | 0.481293614 | 7.79E-27    |
| RP11-423H2.3 | GRIN2C     | 0.641546649 | 0           |
| RP11-423H2.3 | C11orf74   | 0.669323323 | 0           |
| RP11-423H2.3 | PPARGC1A   | 0.709490039 | 0           |
| RP11-423H2.3 | ANGPTL1    | 0.44788223  | 0           |
| RP11-423H2.3 | SCARA5     | 0.257585937 | 4.39E-08    |
| RP11-423H2.3 | LTF        | 0.526196325 | 0           |
| RP11-423H2.3 | CA4        | 0.560576214 | 1.08E-37    |



|              |          |             |             |
|--------------|----------|-------------|-------------|
| RP11-423H2.3 | TG       | 0.548677652 | 0           |
| RP11-423H2.3 | FCGBP    | 0.679312913 | 0           |
| RP11-423H2.3 | PBX4     | 0.657696083 | 0           |
| RP11-423H2.3 | CYR61    | 0.43495108  | 0           |
| RP11-423H2.3 | FOS      | 0.415936536 | 0           |
| RP11-423H2.3 | KHDRBS2  | 0.637920866 | 0           |
| RP11-423H2.3 | MUM1L1   | 0.509614146 | 0           |
| RP11-423H2.3 | RGS16    | 0.568715551 | 0           |
| RP11-423H2.3 | MT1M     | 0.643156358 | 0           |
| RP11-423H2.3 | LRP2     | 0.5927056   | 0           |
| RP11-423H2.3 | MAFB     | 0.509787046 | 0           |
| RP11-423H2.3 | KCNK2    | 0.534833781 | 0           |
| RP11-423H2.3 | TBC1D4   | 0.476300576 | 0           |
| RP11-423H2.3 | MIOX     | 0.682542497 | 1.73E-61    |
| RP11-423H2.3 | TPPP     | 0.611145562 | 0           |
| RP11-423H2.3 | FMOD     | 0.504544036 | 0           |
| RP11-423H2.3 | CITED2   | 0.547836842 | 0           |
| RP11-423H2.3 | RGS8     | 0.563027432 | 4.46E-38    |
| RP11-423H2.3 | ABI3BP   | 0.389151587 | 0           |
| RP11-423H2.3 | ADH1B    | 0.347743778 | 6.35E-14    |
| RP11-423H2.3 | OGN      | 0.213012382 | 6.73E-06    |
| RP11-423H2.3 | NR4A1    | 0.364223428 | 3.80E-15    |
| RP11-423H2.3 | FOXJ1    | 0.58087214  | 5.72E-41    |
| RP11-423H2.3 | ALDH1A1  | 0.534428411 | 0           |
| RP11-423H2.3 | OCA2     | 0.484712819 | 3.02E-27    |
| RP11-423H2.3 | TMEM139  | 0.414269383 | 0           |
| RP11-423H2.3 | ARHGAP24 | 0.594256305 | 0           |
| RP11-423H2.3 | SLC25A15 | 0.594079009 | 0           |
| RP11-423H2.3 | DES      | 0.290736415 | 5.34E-10    |
| RP11-423H2.3 | GDF10    | 0.415437228 | 9.56E-20    |
| RP11-423H2.3 | KIAA1324 | 0.437223595 | 0           |
| RP11-423H2.3 | JUN      | 0.441229501 | 0           |
| RP11-423H2.3 | C7       | 0.090065869 | 0.059376804 |
| RP11-423H2.3 | LGI3     | 0.729552334 | 0           |
| RP11-423H2.3 | CDON     | 0.605849505 | 0           |
| RP11-423H2.3 | BCL2     | 0.576778992 | 0           |
| RP11-423H2.3 | HLF      | 0.625151695 | 0           |
| RP11-423H2.3 | EGR1     | 0.377108764 | 1.69E-16    |
| RP11-423H2.3 | IP6K3    | 0.667762689 | 0           |
| RP11-423H2.3 | SCUBE3   | 0.463873515 | 0           |
| RP11-423H2.3 | PKNOX2   | 0.470063146 | 0           |
| RP11-423H2.3 | SMAD9    | 0.488108233 | 0           |
| RP11-423H2.3 | IQGAP2   | 0.659599679 | 0           |
| RP11-423H2.3 | GNA14    | 0.678099496 | 0           |
| RP11-423H2.3 | LAYN     | 0.474816534 | 0           |
| RP11-423H2.3 | AVPR1A   | 0.519863014 | 0           |
| RP11-423H2.3 | PDLIM3   | 0.502849933 | 0           |
| RP11-423H2.3 | GPM6A    | 0.62783497  | 0           |
| RP11-423H2.3 | SDPR     | 0.423381567 | 0           |
| RP11-423H2.3 | CRYAB    | 0.442392849 | 0           |
| RP11-423H2.3 | FOXA2    | 0.514559327 | 4.79E-31    |

|              |          |             |           |
|--------------|----------|-------------|-----------|
| RP11-423H2.3 | C8orf88  | 0.425259633 | 0         |
| RP11-423H2.3 | ISM1     | 0.430946025 | 0         |
| RP11-423H2.3 | BMP2     | 0.432347234 | 0         |
| RP11-423H2.3 | ID4      | 0.576540848 | 0         |
| RP11-423H2.3 | NUPR1    | 0.532047532 | 0         |
| RP11-423H2.3 | SERTM1   | 0.606828246 | 1.65E-45  |
| RP11-423H2.3 | IRS1     | 0.453539262 | 0         |
| RP11-423H2.3 | FIBIN    | 0.285791324 | 1.27E-09  |
| RP11-423H2.3 | PODN     | 0.187615207 | 7.88E-05  |
| RP11-423H2.3 | TDRD9    | 0.541176738 | 0         |
| RP11-423H2.3 | EPHA3    | 0.283094007 | 1.84E-09  |
| RP11-423H2.3 | AIF1L    | 0.549539029 | 0         |
| RP11-423H2.3 | EBF4     | 0.698249021 | 0         |
| RP11-423H2.3 | ADM2     | 0.680215848 | 0         |
| RP11-423H2.3 | GSTM3    | 0.614074357 | 0         |
| RP11-423H2.3 | HSD17B6  | 0.502089545 | 0         |
| RP11-423H2.3 | AGR3     | 0.469431424 | 1.93E-25  |
| RP11-423H2.3 | EPHB1    | 0.484761302 | 0         |
| RP11-423H2.3 | TMOD1    | 0.372214957 | 6.42E-16  |
| RP11-423H2.3 | WASF3    | 0.594693306 | 0         |
| RP11-423H2.3 | SELV     | 0.684181304 | 6.89E-62  |
| RP11-423H2.3 | ENPP1    | 0.42603761  | 0         |
| RP11-423H2.3 | SYNE1    | 0.537973081 | 2.67E-34  |
| RP11-423H2.3 | PLCH1    | 0.464751345 | 0         |
| RP11-423H2.3 | CCDC146  | 0.590743992 | 0         |
| RP11-423H2.3 | SLC16A2  | 0.461890916 | 0         |
| RP11-423H2.3 | IER2     | 0.558667525 | 0         |
| RP11-423H2.3 | KCNAB1   | 0.486419662 | 0         |
| RP11-423H2.3 | SYNDIG1  | 0.48850481  | 0         |
| RP11-423H2.3 | C16orf89 | 0.666204609 | 0         |
| RP11-423H2.3 | CTGF     | 0.303794285 | 9.94E-11  |
| RP11-423H2.3 | NR4A3    | 0.221646616 | 2.91E-06  |
| RP11-423H2.3 | KIAA1456 | 0.656399833 | 0         |
| RP11-423H2.3 | AQP4     | 0.470777154 | 0         |
| RP11-423H2.3 | RNF150   | 0.527105643 | 0         |
| RP11-423H2.3 | C1S      | 0.0457012   | 0.3392807 |
| RP11-423H2.3 | PFKFB2   | 0.573667227 | 0         |
| RP11-423H2.3 | PROX1    | 0.48925527  | 0         |
| RP11-423H2.3 | TCF7L1   | 0.596637467 | 0         |
| RP11-423H2.3 | HSPB6    | 0.312795979 | 2.60E-11  |
| RP11-423H2.3 | FHDC1    | 0.467291648 | 0         |
| RP11-423H2.3 | PRR15L   | 0.50459141  | 0         |
| RP11-423H2.3 | SLC1A1   | 0.48243957  | 0         |
| RP11-423H2.3 | BTBD11   | 0.570841832 | 0         |
| RP11-423H2.3 | TRIM58   | 0.483304068 | 0         |
| RP11-423H2.3 | LRIG1    | 0.535816996 | 0         |
| RP11-423H2.3 | ROR2     | 0.396301739 | 0         |
| RP11-423H2.3 | GPR125   | 0.559024104 | 0         |
| RP11-423H2.3 | FLRT1    | 0.637777469 | 0         |
| RP11-423H2.3 | PGF      | 0.66442824  | 0         |
| RP11-423H2.3 | DUSP1    | 0.389485897 | 0         |

|              |          |             |             |
|--------------|----------|-------------|-------------|
| RP11-423H2.3 | PLA2G7   | 0.403685922 | 0           |
| RP11-423H2.3 | PLSCR4   | 0.354299367 | 2.62E-14    |
| RP11-423H2.3 | FAM46B   | 0.607589421 | 0           |
| RP11-423H2.3 | GLDC     | 0.600201409 | 0           |
| RP11-423H2.3 | ZBTB16   | 0.421629311 | 0           |
| RP11-423H2.3 | OMD      | 0.134518413 | 0.004753497 |
| RP11-423H2.3 | HSD11B2  | 0.488163266 | 0           |
| RP11-423H2.3 | FGL2     | 0.134737332 | 0.004713775 |
| RP11-423H2.3 | CLCNKA   | 0.667882282 | 5.02E-58    |
| RP11-423H2.3 | GATM     | 0.511551358 | 0           |
| RP11-423H2.3 | TNS3     | 0.386403493 | 0           |
| RP11-423H2.3 | TOB1     | 0.434122326 | 0           |
| RP11-423H2.3 | MARC2    | 0.68743706  | 0           |
| RP11-423H2.3 | LRRC2    | 0.640920722 | 0           |
| RP11-423H2.3 | SORD     | 0.349684838 | 6.09E-14    |
| RP11-423H2.3 | RIMS4    | 0.44008913  | 0           |
| RP11-423H2.3 | SLC29A4  | 0.663918052 | 0           |
| RP11-423H2.3 | SLC39A14 | 0.537627405 | 0           |
| RP11-423H2.3 | FAXDC2   | 0.576135335 | 0           |
| RP11-423H2.3 | HSPB8    | 0.488491903 | 0           |
| RP11-423H2.3 | CCL19    | 0.024392437 | 0.610263743 |
| RP11-423H2.3 | KCNIP3   | 0.666076671 | 0           |
| RP11-423H2.3 | CGNL1    | 0.516859329 | 0           |
| RP11-423H2.3 | ATF3     | 0.216554237 | 4.93E-06    |
| RP11-423H2.3 | SGCD     | 0.4083969   | 0           |
| RP11-423H2.3 | STARD13  | 0.541143973 | 0           |
| RP11-423H2.3 | LDHD     | 0.646629666 | 0           |
| RP11-423H2.3 | RCAN1    | 0.449661293 | 0           |
| RP11-423H2.3 | ID3      | 0.594801953 | 0           |
| RP11-423H2.3 | SYTL3    | 0.647496149 | 0           |
| RP11-423H2.3 | MT1E     | 0.58185591  | 0           |
| RP11-423H2.3 | CAMK1D   | 0.504183628 | 0           |
| RP11-423H2.3 | PRKCQ    | 0.545282213 | 0           |
| RP11-423H2.3 | NUAK2    | 0.455610935 | 0           |
| RP11-423H2.3 | LIPG     | 0.477468037 | 0           |
| RP11-423H2.3 | SLC25A25 | 0.411680004 | 0           |
| RP11-423H2.3 | PRKX     | 0.24803201  | 1.55E-07    |
| RP11-423H2.3 | SRPX     | 0.171699805 | 0.000307205 |
| RP11-423H2.3 | FAM189A1 | 0.483527036 | 0           |
| RP11-423H2.3 | PLEKHH1  | 0.557658354 | 0           |
| RP11-423H2.3 | WNT11    | 0.50062153  | 0           |
| RP11-423H2.3 | SNAI1    | 0.418256708 | 0           |
| RP11-423H2.3 | FDCSP    | 0.056619613 | 0.236460486 |
| RP11-423H2.3 | MT1X     | 0.518777818 | 0           |
| RP11-423H2.3 | ACACB    | 0.639812832 | 0           |
| RP11-423H2.3 | ARC      | 0.184097646 | 0.000107462 |
| RP11-423H2.3 | KLK4     | 0.350152937 | 4.15E-14    |
| RP11-423H2.3 | ZFPM2    | 0.220345685 | 3.33E-06    |
| RP11-423H2.3 | AKAP12   | 0.271438257 | 8.60E-09    |
| RP11-423H2.3 | GJB6     | 0.461146904 | 1.68E-24    |
| RP11-423H2.3 | ERO1LB   | 0.590137639 | 0           |

|              |          |             |             |
|--------------|----------|-------------|-------------|
| RP11-423H2.3 | DNALI1   | 0.532151357 | 0           |
| RP11-423H2.3 | HKDC1    | 0.415817677 | 0           |
| RP11-423H2.3 | ZFP36L2  | 0.483685609 | 0           |
| RP11-423H2.3 | CAPSL    | 0.496405116 | 1.09E-28    |
| RP11-423H2.3 | CYP7B1   | 0.4001251   | 0           |
| RP11-423H2.3 | CPQ      | 0.476208665 | 0           |
| RP11-423H2.3 | RPS6KA6  | 0.520871636 | 6.73E-32    |
| RP11-423H2.3 | TLE1     | 0.550512741 | 0           |
| RP11-423H2.3 | TP53INP2 | 0.600864923 | 0           |
| RP11-423H2.3 | KATNAL2  | 0.678927967 | 0           |
| RP11-423H2.3 | SGPP2    | 0.20558895  | 1.48E-05    |
| RP11-423H2.3 | CTH      | 0.535915573 | 0           |
| RP11-423H2.3 | KIF12    | 0.527078694 | 0           |
| RP11-423H2.3 | TMEM220  | 0.579868347 | 0           |
| RP11-423H2.3 | CENPJ    | 0.55866554  | 0           |
| RP11-423H2.3 | FAM155B  | 0.365218841 | 3.09E-15    |
| RP11-423H2.3 | WFS1     | 0.642500645 | 0           |
| RP11-423H2.3 | SELENBP1 | 0.475693513 | 0           |
| RP11-423H2.3 | SNTA1    | 0.684268418 | 0           |
| RP11-423H2.3 | FRAS1    | 0.332215184 | 1.21E-12    |
| RP11-423H2.3 | FBLN7    | 0.660772956 | 0           |
| RP11-423H2.3 | AGPAT9   | 0.516517501 | 0           |
| RP11-423H2.3 | GPR83    | 0.452331944 | 0           |
| RP11-423H2.3 | PRTG     | 0.491873583 | 0           |
| RP11-423H2.3 | EGR3     | 0.13813348  | 0.003758875 |
| RP11-423H2.3 | GRAMD2   | 0.545147043 | 0           |
| RP11-423H2.3 | HYOU1    | 0.500087514 | 0           |
| RP11-423H2.3 | FBLN5    | 0.296771361 | 2.74E-10    |
| RP11-423H2.3 | ITM2A    | 0.481166724 | 0           |
| RP11-423H2.3 | SRF      | 0.476814593 | 0           |
| RP11-423H2.3 | FGFR2    | 0.367175909 | 2.04E-15    |
| RP11-423H2.3 | MT1A     | 0.357897291 | 1.03E-14    |
| RP11-423H2.3 | MAMDC2   | 0.262121685 | 2.81E-08    |
| RP11-423H2.3 | FHL2     | 0.395306467 | 0           |
| RP11-423H2.3 | FTCDNL1  | 0.561621567 | 0           |
| RP11-423H2.3 | PKIA     | 0.254109305 | 7.50E-08    |
| RP11-423H2.3 | DNAJB4   | 0.383067767 | 4.19E-18    |
| RP11-423H2.3 | SLC25A33 | 0.654852532 | 0           |
| RP11-423H2.3 | EYA2     | 0.437415642 | 0           |
| RP11-423H2.3 | LPAR1    | 0.2970739   | 2.63E-10    |
| RP11-423H2.3 | STX11    | 0.425536215 | 0           |
| RP11-423H2.3 | ARHGEF28 | 0.589255412 | 0           |
| RP11-423H2.3 | OR2W3    | 0.55130944  | 0           |
| RP11-423H2.3 | ALDH1B1  | 0.49910999  | 4.94E-29    |
| RP11-423H2.3 | CXCL12   | 0.169461898 | 0.000368637 |
| RP11-423H2.3 | OLFM2    | 0.396503431 | 0           |
| RP11-423H2.3 | TUB      | 0.408822979 | 0           |
| RP11-423H2.3 | HTRA3    | 0.29677278  | 2.74E-10    |
| RP11-423H2.3 | CKB      | 0.684174522 | 0           |
| RP11-423H2.3 | RGS2     | 0.144176309 | 0.002482377 |
| RP11-423H2.3 | SHANK2   | 0.560721185 | 0           |

|              |          |             |             |
|--------------|----------|-------------|-------------|
| RP11-423H2.3 | CNTRF    | 0.479510181 | 1.27E-26    |
| RP11-423H2.3 | CYTH3    | 0.463233688 | 0           |
| RP11-423H2.3 | PLAC9    | 0.384671236 | 0           |
| RP11-423H2.3 | WVOX     | 0.574963051 | 0           |
| RP11-423H2.3 | NPR3     | 0.416182907 | 0           |
| RP11-423H2.3 | SDC2     | 0.356647055 | 1.69E-14    |
| RP11-423H2.3 | KLF15    | 0.542911689 | 0           |
| RP11-423H2.3 | TMEM164  | 0.511269244 | 0           |
| RP11-423H2.3 | LONRF3   | 0.168507334 | 0.000398175 |
| RP11-423H2.3 | GBP1     | 0.186372856 | 8.80E-05    |
| RP11-423H2.3 | ARHGAP6  | 0.492749995 | 0           |
| RP11-423H2.3 | TMEM119  | 0.117052511 | 0.014169224 |
| RP11-423H2.3 | SH3RF1   | 0.402337192 | 0           |
| RP11-423H2.3 | CRELD2   | 0.590378336 | 0           |
| RP11-423H2.3 | PCP4     | 0.175183892 | 0.000230277 |
| RP11-423H2.3 | GCSH     | 0.630790004 | 0           |
| RP11-423H2.3 | IMPA2    | 0.562004244 | 0           |
| RP11-423H2.3 | C1R      | 0.036407748 | 0.446564038 |
| RP11-423H2.3 | SUCNR1   | 0.271324078 | 8.72E-09    |
| RP11-423H2.3 | SFRP1    | 0.349181458 | 6.67E-14    |
| RP11-423H2.3 | UGT8     | 0.595902042 | 0           |
| RP11-423H2.3 | TLE4     | 0.168990715 | 0.000382952 |
| RP11-423H2.3 | ANTXR1   | 0.260703739 | 3.35E-08    |
| RP11-423H2.3 | GPX3     | 0.488726076 | 0           |
| RP11-423H2.3 | DPY19L2  | 0.644265525 | 0           |
| RP11-423H2.3 | FAM46C   | 0.373243844 | 4.97E-16    |
| RP11-423H2.3 | IL33     | 0.244000369 | 2.26E-07    |
| RP11-423H2.3 | PEG3     | 0.467331505 | 0           |
| RP11-423H2.3 | FAHD2A   | 0.750544371 | 0           |
| RP11-423H2.3 | PTGDS    | 0.106470894 | 0.025735247 |
| RP11-423H2.3 | CHCHD10  | 0.619094398 | 0           |
| RP11-423H2.3 | CD36     | 0.49779117  | 0           |
| RP11-423H2.3 | ANKRD37  | 0.529373477 | 0           |
| RP11-423H2.3 | TSPAN33  | 0.526767078 | 0           |
| RP11-423H2.3 | PRDM16   | 0.466567144 | 0           |
| RP11-423H2.3 | UST      | 0.46493857  | 0           |
| RP11-423H2.3 | NEXN     | 0.511346829 | 0           |
| RP11-423H2.3 | NUPR1L   | 0.28681088  | 9.28E-10    |
| RP11-423H2.3 | SLC24A3  | 0.576203417 | 0           |
| RP11-423H2.3 | MARC1    | 0.510952096 | 0           |
| RP11-423H2.3 | MYH11    | 0.294649762 | 3.71E-10    |
| RP11-423H2.3 | APOA1    | 0.573786036 | 8.45E-40    |
| RP11-423H2.3 | TMEM178B | 0.473196612 | 0           |
| RP11-423H2.3 | CAPN6    | 0.244087834 | 2.24E-07    |
| RP11-423H2.3 | PPM1L    | 0.525217224 | 0           |
| RP11-423H2.3 | FZD8     | 0.628678475 | 0           |
| RP11-423H2.3 | RCAN2    | 0.518254155 | 0           |
| RP11-423H2.3 | COPZ2    | 0.656764922 | 0           |
| RP11-423H2.3 | GAS1     | 0.247751314 | 1.60E-07    |
| RP11-423H2.3 | DACT1    | 0.430710434 | 0           |
| RP11-423H2.3 | WBSCR17  | 0.494383391 | 0           |

|              |          |             |             |
|--------------|----------|-------------|-------------|
| RP11-423H2.3 | NCS1     | 0.506245514 | 0           |
| RP11-423H2.3 | SPIRE2   | 0.615442943 | 0           |
| RP11-423H2.3 | C15orf52 | 0.545263633 | 0           |
| RP11-423H2.3 | SPAG5    | 0.54345989  | 0           |
| RP11-423H2.3 | ARL4D    | 0.508871629 | 0           |
| RP11-423H2.3 | FAM189A2 | 0.40632778  | 0           |
| RP11-423H2.3 | MAP1LC3A | 0.657937631 | 0           |
| RP11-423H2.3 | KLF6     | 0.132850756 | 0.005334162 |
| RP11-423H2.3 | ADD3     | 0.229707078 | 1.23E-06    |
| RP11-423H2.3 | TSPAN7   | 0.388155039 | 0           |
| RP11-423H2.3 | KLF9     | 0.315468899 | 1.73E-11    |
| RP11-423H2.3 | KCNQ1    | 0.620033502 | 0           |
| RP11-423H2.3 | MAN1A1   | 0.115766474 | 0.015272384 |
| RP11-423H2.3 | MLF1     | 0.342847863 | 2.03E-13    |
| RP11-423H2.3 | RARB     | 0.520142858 | 0           |
| RP11-423H2.3 | CDC42EP2 | 0.491064119 | 0           |
| RP11-423H2.3 | FAM3B    | 0.324805754 | 4.02E-12    |
| RP11-423H2.3 | GADD45B  | 0.359538547 | 9.69E-15    |
| RP11-423H2.3 | TMEM47   | 0.372149428 | 6.53E-16    |
| RP11-423H2.3 | SDF2L1   | 0.543540879 | 0           |
| RP11-423H2.3 | CCDC85A  | 0.313042492 | 2.50E-11    |
| RP11-423H2.3 | CRYBG3   | 0.181005881 | 0.000140546 |
| RP11-423H2.3 | FBLN2    | 0.092617235 | 0.052504411 |
| RP11-423H2.3 | PEBP4    | 0.365386918 | 2.98E-15    |
| RP11-423H2.3 | CDADC1   | 0.58372192  | 0           |
| RP11-423H2.3 | FAM63A   | 0.44170423  | 0           |
| RP11-423H2.3 | GLUL     | 0.40862157  | 0           |
| RP11-423H2.3 | FREM2    | 0.560925147 | 0           |
| RP11-423H2.3 | ACKR3    | 0.42453059  | 0           |
| RP11-423H2.3 | DENND6A  | 0.551730555 | 0           |
| RP11-423H2.3 | CLDN8    | 0.299039337 | 1.98E-10    |
| RP11-423H2.3 | UTS2R    | 0.268383379 | 1.11E-08    |
| RP11-423H2.3 | SCNN1B   | 0.454800903 | 0           |
| RP11-423H2.3 | TTC30A   | 0.514916018 | 0           |
| RP11-423H2.3 | CORO2B   | 0.478393524 | 0           |
| RP11-423H2.3 | TC2N     | 0.393695623 | 0           |
| RP11-423H2.3 | ALDH2    | 0.562277706 | 0           |
| RP11-423H2.3 | GPR183   | 0.093817178 | 0.049509218 |
| RP11-423H2.3 | C4orf47  | 0.467489369 | 0           |
| RP11-423H2.3 | SLC25A42 | 0.595030452 | 0           |
| RP11-423H2.3 | LGMN     | 0.57117756  | 0           |
| RP11-423H2.3 | ACSF2    | 0.677090892 | 0           |
| RP11-423H2.3 | KIAA1467 | 0.530114292 | 0           |
| RP11-423H2.3 | PRKG1    | 0.487761583 | 0           |
| RP11-423H2.3 | GNAI1    | 0.568128629 | 0           |
| RP11-423H2.3 | ABCC4    | 0.289705887 | 7.42E-10    |
| RP11-423H2.3 | PRPS1    | 0.535594454 | 0           |
| RP11-423H2.3 | TSPAN5   | 0.420253066 | 0           |
| RP11-423H2.3 | CR2      | 0.192965757 | 4.70E-05    |
| RP11-423H2.3 | CCDC170  | 0.468139267 | 0           |
| RP11-423H2.3 | RRAD     | 0.157517652 | 0.000939561 |

|              |          |              |             |
|--------------|----------|--------------|-------------|
| RP11-423H2.3 | SCGB2A1  | 0.547167371  | 0           |
| RP11-423H2.3 | SESN3    | 0.164933181  | 0.000529499 |
| RP11-423H2.3 | SGK223   | 0.201815232  | 2.12E-05    |
| RP11-423H2.3 | NDRG2    | 0.600083258  | 0           |
| RP11-423H2.3 | C3orf52  | 0.476557726  | 0           |
| RP11-423H2.3 | FLRT3    | -0.275866412 | 4.82E-09    |
| RP11-423H2.3 | MST1R    | -0.593735763 | 0           |
| RP11-423H2.3 | SDC1     | -0.107485313 | 0.024352247 |
| RP11-423H2.3 | ST8SIA4  | -0.519825711 | 0           |
| RP11-423H2.3 | UBTD1    | -0.334075236 | 8.94E-13    |
| RP11-423H2.3 | EPHA2    | -0.330374422 | 1.64E-12    |
| RP11-423H2.3 | TMEM130  | -0.477400097 | 0           |
| RP11-423H2.3 | SPINK2   | -0.339679647 | 3.49E-13    |
| RP11-423H2.3 | MMP16    | -0.479366385 | 0           |
| RP11-423H2.3 | SIGLEC15 | -0.521609454 | 0           |
| RP11-423H2.3 | RIN1     | -0.565320112 | 0           |
| RP11-423H2.3 | IL1RN    | -0.362048639 | 5.90E-15    |
| RP11-423H2.3 | FCER1G   | -0.318676972 | 1.05E-11    |
| RP11-423H2.3 | CD276    | -0.656210906 | 0           |
| RP11-423H2.3 | CTSB     | -0.407391842 | 0           |
| RP11-423H2.3 | FAM171A2 | -0.345291433 | 1.33E-13    |
| RP11-423H2.3 | ASPHD1   | -0.480491437 | 0           |
| RP11-423H2.3 | C15orf48 | -0.30144603  | 1.40E-10    |
| RP11-423H2.3 | DYSF     | -0.33567445  | 6.85E-13    |
| RP11-423H2.3 | PDZRN4   | -0.36720456  | 2.02E-15    |
| RP11-423H2.3 | EFHD2    | -0.283126913 | 1.83E-09    |
| RP11-423H2.3 | ASF1B    | -0.257596371 | 4.91E-08    |
| RP11-423H2.3 | AQP1     | -0.199469671 | 2.65E-05    |
| RP11-423H2.3 | ARRDC2   | -0.388714729 | 0           |
| RP11-423H2.3 | PRSS1    | -0.54694005  | 1.29E-35    |
| RP11-423H2.3 | MAPK13   | -0.546632503 | 0           |
| RP11-423H2.3 | CST5     | -0.458301259 | 3.49E-24    |
| RP11-423H2.3 | AHR      | -0.503072618 | 0           |
| RP11-423H2.3 | BAX      | -0.257457229 | 4.99E-08    |
| RP11-423H2.3 | C1orf115 | -0.368084518 | 1.67E-15    |
| RP11-423H2.3 | PLK3     | -0.336077835 | 6.41E-13    |
| RP11-423H2.3 | JAG2     | -0.169918188 | 0.000355251 |
| RP11-423H2.3 | RAD23B   | -0.629203272 | 0           |
| RP11-423H2.3 | CA12     | 0.013670972  | 0.775070792 |
| RP11-423H2.3 | ADTRP    | -0.451169022 | 0           |
| RP11-423H2.3 | UCP2     | -0.338101567 | 4.56E-13    |
| RP11-423H2.3 | IGFBP2   | -0.148739635 | 0.001795969 |
| RP11-423H2.3 | LOXL2    | -0.323833461 | 4.69E-12    |
| RP11-423H2.3 | GPX1     | -0.235672039 | 6.38E-07    |
| RP11-423H2.3 | P3H3     | -0.419731105 | 0           |
| RP11-423H2.3 | C2orf81  | -0.509980653 | 0           |
| RP11-423H2.3 | CDT1     | -0.276393904 | 4.50E-09    |
| RP11-423H2.3 | SNX25    | -0.379298162 | 7.83E-17    |
| RP11-423H2.3 | MTHFD1L  | -0.402131103 | 0           |
| RP11-423H2.3 | CDC42BPG | -0.503619134 | 1.31E-29    |
| RP11-423H2.3 | MSN      | -0.582182561 | 0           |

|              |          |              |             |
|--------------|----------|--------------|-------------|
| RP11-423H2.3 | SIGLEC6  | -0.494191658 | 2.06E-28    |
| RP11-423H2.3 | F2R      | -0.169710113 | 0.000361298 |
| RP11-423H2.3 | TMEM184A | -0.41872704  | 0           |
| RP11-423H2.3 | CKS2     | -0.106626347 | 0.025519012 |
| RP11-423H2.3 | TAX1BP3  | -0.437651943 | 0           |
| RP11-423H2.3 | PMEPA1   | -0.527458534 | 0           |
| RP11-423H2.3 | CXCL16   | -0.506105521 | 0           |
| RP11-423H2.3 | FAXC     | -0.544675292 | 0           |
| RP11-423H2.3 | VTCN1    | -0.409644017 | 3.41E-19    |
| RP11-423H2.3 | SH2D4A   | -0.52512432  | 0           |
| RP11-423H2.3 | RNF24    | -0.556647055 | 0           |
| RP11-423H2.3 | LY6G6C   | -0.464132107 | 7.76E-25    |
| RP11-423H2.3 | NID1     | -0.386142229 | 0           |
| RP11-423H2.3 | STAC     | -0.638843091 | 0           |
| RP11-423H2.3 | RAB34    | -0.55438064  | 0           |
| RP11-423H2.3 | HES4     | -0.132418011 | 0.005486451 |
| RP11-423H2.3 | EPHA10   | -0.653036733 | 0           |
| RP11-423H2.3 | ENTPD2   | -0.585747496 | 0           |
| RP11-423H2.3 | DDB2     | -0.440293801 | 0           |
| RP11-423H2.3 | NKAIN4   | -0.212371035 | 7.54E-06    |
| RP11-423H2.3 | TRIM29   | -0.374035578 | 4.05E-16    |
| RP11-423H2.3 | ADCY8    | -0.668670018 | 3.31E-58    |
| RP11-423H2.3 | SFTA2    | -0.195491423 | 3.85E-05    |
| RP11-423H2.3 | NRIP1    | -0.690179339 | 0           |
| RP11-423H2.3 | VWA1     | -0.14825285  | 0.001859854 |
| RP11-423H2.3 | APLNR    | -0.201848138 | 2.12E-05    |
| RP11-423H2.3 | REN      | -0.536829101 | 3.90E-34    |
| RP11-423H2.3 | EDIL3    | -0.284078215 | 1.61E-09    |
| RP11-423H2.3 | AGRN     | -0.42660666  | 0           |
| RP11-423H2.3 | TREM1    | -0.443290395 | 0           |
| RP11-423H2.3 | SRL      | -0.272502035 | 7.49E-09    |
| RP11-423H2.3 | RASGRF1  | -0.624034586 | 0           |
| RP11-423H2.3 | RMI2     | -0.478691808 | 0           |
| RP11-423H2.3 | SAMD1    | -0.413781605 | 0           |
| RP11-423H2.3 | MGAT4B   | -0.577035859 | 0           |
| RP11-423H2.3 | NXN      | -0.473222994 | 0           |
| RP11-423H2.3 | SH3BGRL3 | -0.428585288 | 0           |
| RP11-423H2.3 | CA11     | -0.447554019 | 0           |
| RP11-423H2.3 | PLD3     | -0.347874854 | 8.42E-14    |
| RP11-423H2.3 | LURAP1L  | -0.394508775 | 0           |
| RP11-423H2.3 | CARNS1   | -0.276519005 | 4.43E-09    |
| RP11-423H2.3 | PDLIM7   | -0.466883016 | 0           |
| RP11-423H2.3 | BCL2L1   | -0.495127895 | 0           |
| RP11-423H2.3 | GGT6     | -0.210351274 | 9.23E-06    |
| RP11-423H2.3 | DPYSL3   | -0.408895316 | 0           |
| RP11-423H2.3 | FYN      | -0.557554246 | 0           |
| RP11-423H2.3 | TK1      | -0.20205366  | 2.07E-05    |
| RP11-423H2.3 | AK1      | -0.190528258 | 6.06E-05    |
| RP11-423H2.3 | HIGD1B   | -0.103930023 | 0.029500084 |
| RP11-423H2.3 | TMEM59L  | -0.375321048 | 2.86E-16    |
| RP11-423H2.3 | MEGF9    | -0.497772306 | 0           |



|              |          |              |             |
|--------------|----------|--------------|-------------|
| RP11-423H2.3 | ZFP36L1  | -0.492423911 | 0           |
| RP11-423H2.3 | ADRA1B   | -0.405192374 | 0           |
| RP11-423H2.3 | EPHA4    | -0.501277669 | 0           |
| RP11-423H2.3 | TCERG1L  | -0.230383925 | 1.14E-06    |
| RP11-423H2.3 | NGFR     | -0.405752205 | 0           |
| RP11-423H2.3 | EBI3     | -0.465751155 | 0           |
| RP11-423H2.3 | S100A10  | -0.427891705 | 0           |
| RP11-423H2.3 | S100B    | -0.426402273 | 0           |
| RP11-423H2.3 | CD44     | -0.461371366 | 0           |
| RP11-423H2.3 | BHLHE41  | -0.577196277 | 0           |
| RP11-423H2.3 | FBXO2    | -0.448295685 | 0           |
| RP11-423H2.3 | SLC30A2  | -0.112832005 | 0.018075931 |
| RP11-423H2.3 | FRMD5    | -0.465560952 | 0           |
| RP11-423H2.3 | SAMD11   | -0.302053518 | 1.28E-10    |
| RP11-423H2.3 | SIPA1L2  | -0.605201309 | 0           |
| RP11-423H2.3 | S100A16  | -0.450533591 | 0           |
| RP11-423H2.3 | PPL      | -0.548308167 | 0           |
| RP11-423H2.3 | ARHGDIB  | -0.182607931 | 0.000122364 |
| RP11-423H2.3 | CDC42EP3 | -0.44925422  | 0           |
| RP11-423H2.3 | RUNX2    | -0.686343779 | 0           |
| RP11-423H2.3 | LAMC2    | -0.482648922 | 0           |
| RP11-423H2.3 | BRINP1   | -0.605800855 | 0           |
| RP11-423H2.3 | GPRC5B   | -0.565093173 | 0           |
| RP11-423H2.3 | AQP5     | -0.205571504 | 1.48E-05    |
| RP11-423H2.3 | PLAG1    | -0.528480754 | 0           |
| RP11-423H2.3 | PTPRU    | -0.483449734 | 0           |
| RP11-423H2.3 | ANGPTL4  | -0.326687082 | 2.98E-12    |
| RP11-423H2.3 | PALM3    | -0.361312362 | 6.84E-15    |
| RP11-423H2.3 | ACP5     | -0.347309917 | 9.30E-14    |
| RP11-423H2.3 | DLG4     | -0.472049717 | 0           |
| RP11-423H2.3 | ETNK2    | -0.580410448 | 0           |
| RP11-423H2.3 | CD109    | -0.55190544  | 0           |
| RP11-423H2.3 | SNX22    | -0.360957486 | 7.33E-15    |
| RP11-423H2.3 | TMEM98   | -0.602395913 | 0           |
| RP11-423H2.3 | CTHRC1   | -0.404163345 | 0           |
| RP11-423H2.3 | S100A2   | -0.267960552 | 1.34E-08    |
| RP11-423H2.3 | C11orf80 | -0.565629033 | 0           |
| RP11-423H2.3 | SREBF1   | -0.437659602 | 0           |
| RP11-423H2.3 | PRSS22   | -0.46877952  | 0           |
| RP11-423H2.3 | CMTM3    | -0.492653404 | 0           |
| RP11-423H2.3 | RDH5     | -0.532771469 | 0           |
| RP11-423H2.3 | MYH10    | -0.618280679 | 0           |
| RP11-423H2.3 | EVPL     | -0.447447073 | 0           |
| RP11-423H2.3 | SCD      | -0.48273062  | 0           |
| RP11-423H2.3 | CD151    | -0.472330412 | 0           |
| RP11-423H2.3 | S100A4   | -0.373255191 | 4.95E-16    |
| RP11-423H2.3 | BNIP1    | -0.442774391 | 0           |
| RP11-423H2.3 | MAP3K6   | -0.449088413 | 0           |
| RP11-423H2.3 | MANEAL   | -0.4043405   | 0           |
| RP11-423H2.3 | CD207    | -0.450752624 | 2.35E-23    |
| RP11-423H2.3 | CD1A     | -0.454752651 | 8.61E-24    |

|              |          |              |             |
|--------------|----------|--------------|-------------|
| RP11-423H2.3 | C3       | -0.474568177 | 0           |
| RP11-423H2.3 | NT5E     | -0.493791363 | 0           |
| RP11-423H2.3 | CACNG4   | -0.512445437 | 9.17E-31    |
| RP11-423H2.3 | FHOD1    | -0.371885753 | 6.96E-16    |
| RP11-423H2.3 | LEMD1    | -0.645454262 | 0           |
| RP11-423H2.3 | ATP11A   | -0.41306093  | 0           |
| RP11-423H2.3 | PPAP2C   | -0.408152515 | 0           |
| RP11-423H2.3 | DRAM1    | -0.541500977 | 0           |
| RP11-423H2.3 | CDA      | -0.188115892 | 7.53E-05    |
| RP11-423H2.3 | CCND2    | -0.428478627 | 0           |
| RP11-423H2.3 | LCN6     | -0.352915333 | 2.54E-14    |
| RP11-423H2.3 | CDH4     | -0.479505386 | 0           |
| RP11-423H2.3 | MMP11    | -0.458570225 | 0           |
| RP11-423H2.3 | B3GAT1   | -0.380853122 | 3.84E-17    |
| RP11-423H2.3 | SPP1     | -0.248903599 | 1.40E-07    |
| RP11-423H2.3 | HLA-DQB1 | -0.299863978 | 1.76E-10    |
| RP11-423H2.3 | SDC3     | -0.655000043 | 0           |
| RP11-423H2.3 | CX3CL1   | -0.319180777 | 9.74E-12    |
| RP11-423H2.3 | SDK1     | -0.54861723  | 0           |
| RP11-423H2.3 | DOCK9    | -0.613505306 | 0           |
| RP11-423H2.3 | CSF2     | -0.525317065 | 1.65E-32    |
| RP11-423H2.3 | GRHL3    | -0.538950604 | 0           |
| RP11-423H2.3 | TMEM92   | -0.632124544 | 2.35E-50    |
| RP11-423H2.3 | BASP1    | -0.465599957 | 0           |
| RP11-423H2.3 | HRH1     | -0.570033927 | 0           |
| RP11-423H2.3 | ESM1     | -0.057360354 | 0.230275897 |
| RP11-423H2.3 | B4GALNT3 | -0.537874627 | 0           |
| RP11-423H2.3 | LMO3     | -0.247116593 | 1.72E-07    |
| RP11-423H2.3 | C9orf16  | -0.380528031 | 4.55E-17    |
| RP11-423H2.3 | SEMA3F   | -0.340887957 | 2.84E-13    |
| RP11-423H2.3 | PLA2G12B | -0.342616243 | 1.55E-13    |
| RP11-423H2.3 | KLK6     | -0.54215413  | 6.58E-35    |
| RP11-423H2.3 | ST3GAL5  | -0.448713821 | 0           |
| RP11-423H2.3 | FAM132B  | -0.15724575  | 0.000959089 |
| RP11-423H2.3 | CDKN1A   | -0.148235546 | 0.001862163 |
| RP11-423H2.3 | E2F1     | -0.250688052 | 1.13E-07    |
| RP11-423H2.3 | B3GNT8   | -0.375976478 | 2.37E-16    |
| RP11-423H2.3 | MTMR11   | -0.680340097 | 0           |
| RP11-423H2.3 | MYO1G    | -0.377231169 | 1.62E-16    |
| RP11-423H2.3 | TMSB10   | -0.410680903 | 0           |
| RP11-423H2.3 | UNC5CL   | -0.581667551 | 0           |
| RP11-423H2.3 | ABR      | -0.529358159 | 0           |
| RP11-423H2.3 | PLP2     | -0.52998593  | 0           |
| RP11-423H2.3 | SRCIN1   | -0.479229654 | 0           |
| RP11-423H2.3 | PDE9A    | -0.430207054 | 0           |
| RP11-423H2.3 | TREM2    | -0.276790765 | 4.27E-09    |
| RP11-423H2.3 | KDEL3    | -0.409049918 | 0           |
| RP11-423H2.3 | PC       | -0.586149179 | 0           |
| RP11-423H2.3 | C2CD4A   | -0.545802897 | 0           |
| RP11-423H2.3 | PELI1    | -0.486972259 | 0           |
| RP11-423H2.3 | SSX1     | -0.198572693 | 2.89E-05    |

|              |          |              |             |
|--------------|----------|--------------|-------------|
| RP11-423H2.3 | MROH6    | -0.459700525 | 0           |
| RP11-423H2.3 | ESPN     | -0.527908867 | 0           |
| RP11-423H2.3 | BMP1     | -0.454811683 | 0           |
| RP11-423H2.3 | TM4SF4   | -0.518423876 | 1.45E-31    |
| RP11-423H2.3 | CORO2A   | -0.649748806 | 0           |
| RP11-423H2.3 | CD164L2  | -0.465256373 | 5.78E-25    |
| RP11-423H2.3 | CTSS     | -0.4235539   | 0           |
| RP11-423H2.3 | CLU      | -0.609240547 | 0           |
| RP11-423H2.3 | TMSB4X   | -0.393772783 | 0           |
| RP11-423H2.3 | WNT10A   | -0.498438604 | 6.01E-29    |
| RP11-423H2.3 | NAPSA    | -0.325333105 | 3.70E-12    |
| RP11-423H2.3 | PLEKHA4  | -0.570996009 | 0           |
| RP11-423H2.3 | SFTPA1   | -0.15740017  | 0.000935807 |
| RP11-423H2.3 | Clorf116 | -0.481794353 | 0           |
| RP11-423H2.3 | TM4SF1   | -0.372713231 | 5.68E-16    |
| RP11-423H2.3 | SEL1L3   | -0.542688012 | 0           |
| RP11-423H2.3 | VASN     | -0.574619238 | 0           |
| RP11-423H2.3 | NPTXR    | -0.643878735 | 0           |
| RP11-423H2.3 | PDE4C    | -0.308262722 | 5.13E-11    |
| RP11-423H2.3 | CDC42EP1 | -0.55931175  | 0           |
| RP11-423H2.3 | ENDOD1   | -0.683048761 | 0           |
| RP11-423H2.3 | RYR1     | -0.523654037 | 0           |
| RP11-423H2.3 | IL1RAP   | -0.632875152 | 0           |
| RP11-423H2.3 | SLC35F2  | -0.652996616 | 1.05E-54    |
| RP11-423H2.3 | ISYNA1   | -0.440960152 | 0           |
| RP11-423H2.3 | HLA-G    | -0.351991393 | 4.01E-14    |
| RP11-423H2.3 | CDKN2B   | -0.469396228 | 0           |
| RP11-423H2.3 | ALDH1A3  | -0.35548626  | 2.10E-14    |
| RP11-423H2.3 | CLIP3    | -0.60446092  | 0           |
| RP11-423H2.3 | ULBP2    | -0.450175169 | 0           |
| RP11-423H2.3 | ETHE1    | -0.523198172 | 0           |
| RP11-423H2.3 | XPR1     | -0.629356031 | 0           |
| RP11-423H2.3 | SPTBN2   | -0.620375613 | 0           |
| RP11-423H2.3 | IVL      | -0.494324028 | 1.98E-28    |
| RP11-423H2.3 | MARCO    | -0.358893614 | 1.10E-14    |
| RP11-423H2.3 | PLXND1   | -0.42289535  | 0           |
| RP11-423H2.3 | EMILIN2  | -0.421816962 | 0           |
| RP11-423H2.3 | PLAUR    | -0.459059847 | 0           |
| RP11-423H2.3 | CDC42EP5 | -0.471792992 | 0           |
| RP11-423H2.3 | TRPC5    | -0.500744476 | 3.06E-29    |
| RP11-423H2.3 | TMEM100  | -0.544684654 | 0           |
| RP11-423H2.3 | QSOX1    | -0.665073599 | 0           |
| RP11-423H2.3 | ARHGAP23 | -0.526116613 | 0           |
| RP11-423H2.3 | MDF1     | -0.340233804 | 3.18E-13    |
| RP11-423H2.3 | FSTL3    | -0.4854668   | 0           |
| RP11-423H2.3 | INF2     | -0.545196402 | 0           |
| RP11-423H2.3 | TGFBR1   | -0.656875555 | 0           |
| RP11-423H2.3 | TGFBI    | -0.462945333 | 0           |
| RP11-423H2.3 | ERBB3    | -0.61160554  | 0           |
| RP11-423H2.3 | CCL18    | -0.282655021 | 1.95E-09    |
| RP11-423H2.3 | CCL17    | -0.383137919 | 8.47E-17    |

|              |           |              |             |
|--------------|-----------|--------------|-------------|
| RP11-423H2.3 | C16orf45  | -0.585458006 | 0           |
| RP11-423H2.3 | PRDM1     | -0.416637212 | 0           |
| RP11-423H2.3 | TRIM47    | -0.472753654 | 0           |
| RP11-423H2.3 | CNFN      | -0.350676705 | 5.09E-14    |
| RP11-423H2.3 | ARMCX3    | -0.526144838 | 0           |
| RP11-423H2.3 | RAMP1     | -0.441657707 | 0           |
| RP11-423H2.3 | GABRD     | -0.133421225 | 0.005139227 |
| RP11-423H2.3 | COL13A1   | -0.299508393 | 1.85E-10    |
| RP11-423H2.3 | S100A5    | -0.430331445 | 0           |
| RP11-423H2.3 | MISP      | -0.424382087 | 0           |
| RP11-423H2.3 | HES6      | -0.15753836  | 0.000938089 |
| RP11-423H2.3 | PSD3      | -0.632899548 | 0           |
| RP11-423H2.3 | DOK7      | -0.493492654 | 0           |
| RP11-423H2.3 | ZMAT3     | -0.526826791 | 0           |
| RP11-423H2.3 | MFAP2     | -0.492352284 | 0           |
| RP11-423H2.3 | TMEM79    | -0.619820179 | 0           |
| RP11-423H2.3 | SLC1A5    | -0.515057146 | 0           |
| RP11-423H2.3 | BBC3      | -0.440575632 | 0           |
| RP11-423H2.3 | HLA-DQB2  | -0.402785114 | 0           |
| RP11-423H2.3 | C1QL1     | -0.520739142 | 0           |
| RP11-423H2.3 | TMEM215   | -0.374073597 | 4.99E-16    |
| RP11-423H2.3 | PNP       | -0.43664107  | 0           |
| RP11-423H2.3 | ARNTL     | -0.665223663 | 0           |
| RP11-423H2.3 | CLDN2     | -0.474666274 | 4.75E-26    |
| RP11-423H2.3 | MVP       | -0.584188422 | 0           |
| RP11-423H2.3 | LGALS1    | -0.487815907 | 0           |
| RP11-423H2.3 | BIRC7     | -0.370330062 | 1.02E-15    |
| RP11-423H2.3 | COL8A1    | -0.695978208 | 0           |
| RP11-423H2.3 | PERP      | -0.485342835 | 0           |
| RP11-423H2.3 | GJA4      | -0.265856115 | 1.76E-08    |
| RP11-423H2.3 | IGFL2     | -0.517644908 | 1.85E-31    |
| RP11-423H2.3 | DAPK2     | -0.403284239 | 0           |
| RP11-423H2.3 | MAMLD1    | -0.686707308 | 0           |
| RP11-423H2.3 | ETV5      | -0.480164786 | 0           |
| RP11-423H2.3 | RUNX1     | -0.620679428 | 0           |
| RP11-423H2.3 | LONRF2    | -0.458393354 | 0           |
| RP11-423H2.3 | SPOCK1    | -0.327928866 | 2.44E-12    |
| RP11-423H2.3 | XKRX      | -0.46799048  | 0           |
| RP11-423H2.3 | TGFB1     | -0.40451652  | 0           |
| RP11-423H2.3 | ERP27     | -0.295534683 | 3.27E-10    |
| RP11-423H2.3 | TNFRSF10C | -0.414216194 | 0           |
| RP11-423H2.3 | PALM      | -0.543990503 | 0           |
| RP11-423H2.3 | TSC22D1   | -0.597180845 | 0           |
| RP11-423H2.3 | TGM2      | -0.452627817 | 0           |
| RP11-423H2.3 | UBE2QL1   | -0.419436368 | 0           |
| RP11-423H2.3 | ECE1      | -0.650358848 | 0           |
| RP11-423H2.3 | COL8A2    | -0.602085431 | 0           |
| RP11-423H2.3 | HIST3H2A  | -0.315960365 | 1.60E-11    |
| RP11-423H2.3 | TNFRSF21  | -0.520182289 | 0           |
| RP11-423H2.3 | SOX4      | -0.58592153  | 0           |
| RP11-423H2.3 | ELF3      | -0.508425267 | 0           |

|              |            |              |          |
|--------------|------------|--------------|----------|
| RP11-423H2.3 | TPD52L1    | -0.512026796 | 0        |
| RP11-423H2.3 | INHBB      | -0.527923618 | 0        |
| RP11-423H2.3 | HPN        | -0.381283598 | 3.00E-17 |
| RP11-423H2.3 | MMP7       | -0.369581634 | 1.18E-15 |
| RP11-423H2.3 | RAB27A     | -0.598811121 | 0        |
| RP11-423H2.3 | IGF2BP2    | -0.61378203  | 0        |
| RP11-423H2.3 | ITGB4      | -0.537471384 | 0        |
| RP11-423H2.3 | PPP1R1B    | -0.551814664 | 0        |
| RP11-423H2.3 | NPDC1      | -0.318804058 | 1.03E-11 |
| RP11-423H2.3 | CCL13      | -0.507946464 | 3.59E-30 |
| RP11-423H2.3 | SPINT1     | -0.58896422  | 0        |
| RP11-423H2.3 | HEY2       | -0.467346823 | 0        |
| RP11-423H2.3 | CST2       | -0.424308615 | 1.30E-20 |
| RP11-423H2.3 | ADM        | -0.338969468 | 3.94E-13 |
| RP11-423H2.3 | VSTM2L     | -0.248754103 | 1.42E-07 |
| RP11-423H2.3 | FAM84A     | -0.519330983 | 0        |
| RP11-423H2.3 | P4HA2      | -0.531782155 | 0        |
| RP11-423H2.3 | LPL        | -0.435037885 | 0        |
| RP11-423H2.3 | TMEM173    | -0.457839622 | 0        |
| RP11-423H2.3 | DHRS3      | -0.434165161 | 0        |
| RP11-423H2.3 | SCN1B      | -0.516707847 | 0        |
| RP11-423H2.3 | GLT1D1     | -0.378208427 | 1.17E-16 |
| RP11-423H2.3 | PHYHIP     | -0.55656252  | 0        |
| RP11-423H2.3 | BHLHE40    | -0.51237997  | 0        |
| RP11-423H2.3 | BID        | -0.496851925 | 0        |
| RP11-423H2.3 | POSTN      | -0.342235268 | 2.26E-13 |
| RP11-423H2.3 | ITGA3      | -0.651387025 | 0        |
| RP11-423H2.3 | RSP04      | -0.595069883 | 0        |
| RP11-423H2.3 | ADAMTS9    | -0.396875186 | 0        |
| RP11-423H2.3 | ABTB2      | -0.698390432 | 0        |
| RP11-423H2.3 | KCNQ3      | -0.665058423 | 0        |
| RP11-423H2.3 | ANXA1      | -0.505881135 | 0        |
| RP11-423H2.3 | S100A11    | -0.494238434 | 0        |
| RP11-423H2.3 | CEACAM6    | -0.39854744  | 3.65E-18 |
| RP11-423H2.3 | IER5L      | -0.492662765 | 0        |
| RP11-423H2.3 | KRT80      | -0.444667633 | 0        |
| RP11-423H2.3 | CDH6       | -0.526110797 | 0        |
| RP11-423H2.3 | UNC5B      | -0.583853403 | 0        |
| RP11-423H2.3 | PLEKHN1    | -0.571532295 | 0        |
| RP11-423H2.3 | SYTL1      | -0.317103572 | 1.34E-11 |
| RP11-423H2.3 | TMEM163    | -0.48095255  | 0        |
| RP11-423H2.3 | C4orf48    | -0.209345081 | 1.02E-05 |
| RP11-423H2.3 | B3GNT7     | -0.511831344 | 0        |
| RP11-423H2.3 | BAIAP3     | -0.586882335 | 0        |
| RP11-423H2.3 | PHLDA2     | -0.425327147 | 0        |
| RP11-423H2.3 | GAP43      | -0.645372514 | 4.46E-53 |
| RP11-423H2.3 | S100A1     | -0.308991056 | 4.61E-11 |
| RP11-423H2.3 | PTPRE      | -0.672629263 | 0        |
| RP11-423H2.3 | CCND1      | -0.454612118 | 0        |
| RP11-423H2.3 | ST6GALNAC5 | -0.530502451 | 3.11E-33 |
| RP11-423H2.3 | KRT17      | -0.20301489  | 1.89E-05 |

|              |         |              |          |
|--------------|---------|--------------|----------|
| RP11-423H2.3 | HPCAL4  | -0.54215669  | 0        |
| RP11-423H2.3 | GABBR2  | -0.461810069 | 0        |
| RP11-423H2.3 | DIRAS3  | -0.53186513  | 0        |
| RP11-423H2.3 | SERINC2 | -0.303841091 | 9.87E-11 |
| RP11-423H2.3 | PTCHD4  | -0.423169237 | 0        |
| RP11-423H2.3 | EPS8    | -0.63174003  | 0        |
| RP11-423H2.3 | LY6E    | -0.53158954  | 0        |
| RP11-423H2.3 | UPP1    | -0.449605551 | 0        |
| RP11-423H2.3 | AHNAK2  | -0.569763586 | 0        |
| RP11-423H2.3 | PLXNC1  | -0.622655645 | 0        |
| RP11-423H2.3 | TNC     | -0.506494722 | 0        |
| RP11-423H2.3 | DUSP4   | -0.562008641 | 0        |
| RP11-423H2.3 | NRCAM   | -0.620506529 | 0        |
| RP11-423H2.3 | NRP2    | -0.653237007 | 0        |
| RP11-423H2.3 | CTSC    | -0.521996953 | 0        |
| RP11-423H2.3 | AMIGO2  | -0.545535534 | 0        |
| RP11-423H2.3 | NAB2    | -0.45132405  | 0        |
| RP11-423H2.3 | TBC1D2  | -0.568625059 | 0        |
| RP11-423H2.3 | PHLDA3  | -0.402706962 | 0        |
| RP11-423H2.3 | PTP4A3  | -0.379934301 | 6.00E-17 |
| RP11-423H2.3 | CRABP2  | -0.342697373 | 2.08E-13 |
| RP11-423H2.3 | GOS2    | -0.521546053 | 0        |
| RP11-423H2.3 | S100A6  | -0.474471018 | 0        |
| RP11-423H2.3 | FOXQ1   | -0.44431843  | 0        |
| RP11-423H2.3 | LRG1    | -0.545502061 | 0        |
| RP11-423H2.3 | LAMP5   | -0.498164911 | 0        |
| RP11-423H2.3 | ALDH3B1 | -0.496794339 | 0        |
| RP11-423H2.3 | CDH2    | -0.218100829 | 4.21E-06 |
| RP11-423H2.3 | SCG5    | -0.431651381 | 0        |
| RP11-423H2.3 | ZCCHC16 | -0.481509311 | 7.34E-27 |
| RP11-423H2.3 | GRB7    | -0.599680583 | 0        |
| RP11-423H2.3 | TIAM1   | -0.594016601 | 0        |
| RP11-423H2.3 | FXD5    | -0.411016064 | 0        |
| RP11-423H2.3 | CLDN9   | -0.421129052 | 0        |
| RP11-423H2.3 | FAM43A  | -0.553290621 | 0        |
| RP11-423H2.3 | CHST2   | -0.557714947 | 0        |
| RP11-423H2.3 | HMGA2   | -0.617709075 | 0        |
| RP11-423H2.3 | GALNT7  | -0.662417983 | 0        |
| RP11-423H2.3 | CBLN1   | -0.324741927 | 4.06E-12 |
| RP11-423H2.3 | STRA6   | -0.543647824 | 0        |
| RP11-423H2.3 | MUC21   | -0.469784384 | 1.75E-25 |
| RP11-423H2.3 | PRR36   | -0.607551834 | 0        |
| RP11-423H2.3 | NFE2L3  | -0.552772207 | 0        |
| RP11-423H2.3 | NR1D1   | -0.28222185  | 2.07E-09 |
| RP11-423H2.3 | MUC1    | -0.440926679 | 0        |
| RP11-423H2.3 | NAT8L   | -0.445151156 | 0        |
| RP11-423H2.3 | APOC1   | -0.271002108 | 9.09E-09 |
| RP11-423H2.3 | EVA1A   | -0.554527867 | 0        |
| RP11-423H2.3 | ENTPD1  | -0.331689394 | 1.32E-12 |
| RP11-423H2.3 | COL1A1  | -0.461707946 | 0        |
| RP11-423H2.3 | FNDC4   | -0.415306496 | 0        |

|              |           |              |          |
|--------------|-----------|--------------|----------|
| RP11-423H2.3 | FRMD3     | -0.359760097 | 9.28E-15 |
| RP11-423H2.3 | SHROOM4   | -0.652810361 | 0        |
| RP11-423H2.3 | NELL2     | -0.457522332 | 0        |
| RP11-423H2.3 | EPHB3     | -0.582992877 | 0        |
| RP11-423H2.3 | TMC6      | -0.510498359 | 0        |
| RP11-423H2.3 | NOD1      | -0.647979956 | 0        |
| RP11-423H2.3 | GGCT      | -0.627227765 | 0        |
| RP11-423H2.3 | ICAM1     | -0.55675471  | 0        |
| RP11-423H2.3 | PRSS23    | -0.483669582 | 0        |
| RP11-423H2.3 | CFI       | -0.562471739 | 0        |
| RP11-423H2.3 | CD55      | -0.497117728 | 0        |
| RP11-423H2.3 | RASD2     | -0.609901508 | 0        |
| RP11-423H2.3 | KLK11     | -0.50345216  | 1.37E-29 |
| RP11-423H2.3 | ICAM5     | -0.467214063 | 0        |
| RP11-423H2.3 | ADORA1    | -0.522856486 | 0        |
| RP11-423H2.3 | ITGA2     | -0.594436297 | 0        |
| RP11-423H2.3 | ABCC3     | -0.504453119 | 0        |
| RP11-423H2.3 | MFGE8     | -0.641060573 | 0        |
| RP11-423H2.3 | STK32A    | -0.490917459 | 0        |
| RP11-423H2.3 | CYSLTR2   | -0.55012198  | 0        |
| RP11-423H2.3 | LAD1      | -0.548241787 | 0        |
| RP11-423H2.3 | MGAT3     | -0.494407646 | 0        |
| RP11-423H2.3 | IGFBP6    | -0.496454072 | 0        |
| RP11-423H2.3 | CYP2S1    | -0.543981992 | 0        |
| RP11-423H2.3 | KCNJ2     | -0.56606575  | 0        |
| RP11-423H2.3 | FAM20A    | -0.539211017 | 0        |
| RP11-423H2.3 | TGFA      | -0.572690537 | 0        |
| RP11-423H2.3 | MXRA8     | -0.60406562  | 0        |
| RP11-423H2.3 | C8orf4    | -0.386128329 | 0        |
| RP11-423H2.3 | CLDN10    | -0.642936229 | 1.45E-52 |
| RP11-423H2.3 | PDE5A     | -0.652500163 | 0        |
| RP11-423H2.3 | APOE      | -0.301355679 | 1.42E-10 |
| RP11-423H2.3 | SPOCK2    | -0.428222611 | 0        |
| RP11-423H2.3 | TENM1     | -0.373931612 | 4.16E-16 |
| RP11-423H2.3 | SLIT1     | -0.372783866 | 5.58E-16 |
| RP11-423H2.3 | CXCL14    | -0.3907291   | 0        |
| RP11-423H2.3 | ECM1      | -0.276815161 | 4.26E-09 |
| RP11-423H2.3 | DUSP5     | -0.478752372 | 0        |
| RP11-423H2.3 | SEZ6L2    | -0.436235274 | 0        |
| RP11-423H2.3 | THRSP     | -0.192314839 | 5.16E-05 |
| RP11-423H2.3 | C19orf33  | -0.403802653 | 0        |
| RP11-423H2.3 | MPZL2     | -0.55823861  | 0        |
| RP11-423H2.3 | CTSH      | -0.576248238 | 0        |
| RP11-423H2.3 | CYP1B1    | -0.667102863 | 0        |
| RP11-423H2.3 | ALOX5     | -0.454722467 | 0        |
| RP11-423H2.3 | SYTL5     | -0.595675336 | 1.65E-43 |
| RP11-423H2.3 | TNFRSF12A | -0.433684758 | 0        |
| RP11-423H2.3 | DUSP6     | -0.496732356 | 0        |
| RP11-423H2.3 | ALOX15B   | -0.473138884 | 0        |
| RP11-423H2.3 | SDC4      | -0.634751232 | 0        |
| RP11-423H2.3 | MDK       | -0.548883174 | 0        |

|              |          |              |             |
|--------------|----------|--------------|-------------|
| RP11-423H2.3 | KRT19    | -0.472484589 | 0           |
| RP11-423H2.3 | MET      | -0.641337865 | 0           |
| RP11-423H2.3 | TESC     | -0.358446685 | 1.20E-14    |
| RP11-423H2.3 | CXCL17   | -0.531311488 | 2.39E-33    |
| RP11-423H2.3 | NPC2     | -0.518867884 | 0           |
| RP11-423H2.3 | COMP     | -0.459766763 | 0           |
| RP11-423H2.3 | TUSC3    | -0.637347135 | 0           |
| RP11-423H2.3 | TMPRSS4  | -0.537911363 | 0           |
| RP11-423H2.3 | LGALS3   | -0.473698148 | 0           |
| RP11-423H2.3 | CRLF1    | -0.378657341 | 9.99E-17    |
| RP11-423H2.3 | CTXN1    | -0.551100231 | 0           |
| RP11-423H2.3 | PCSK1N   | -0.331602022 | 1.34E-12    |
| RP11-423H2.3 | NMU      | -0.308166884 | 4.12E-11    |
| RP11-423H2.3 | GALE     | -0.495944593 | 0           |
| RP11-423H2.3 | PCSK2    | -0.1814104   | 0.000135729 |
| RP11-423H2.3 | GJB3     | -0.62310924  | 0           |
| RP11-423H2.3 | SLPI     | -0.395714249 | 0           |
| RP11-423H2.3 | AGR2     | -0.252883265 | 8.69E-08    |
| RP11-423H2.3 | MRC2     | -0.643079483 | 0           |
| RP11-423H2.3 | GOLT1A   | -0.528175662 | 0           |
| RP11-423H2.3 | SLC27A6  | -0.571484091 | 2.00E-39    |
| RP11-423H2.3 | KCNN4    | -0.597878968 | 0           |
| RP11-423H2.3 | ETV4     | -0.423148828 | 1.69E-20    |
| RP11-423H2.3 | SYT12    | -0.671723066 | 0           |
| RP11-423H2.3 | PVRL4    | -0.661130102 | 0           |
| RP11-423H2.3 | PLCD3    | -0.593010408 | 0           |
| RP11-423H2.3 | PLAU     | -0.574147488 | 0           |
| RP11-423H2.3 | LRRK2    | -0.389186479 | 0           |
| RP11-423H2.3 | SFN      | -0.454318373 | 0           |
| RP11-423H2.3 | LPAR5    | -0.590494785 | 0           |
| RP11-423H2.3 | NGEF     | -0.557112707 | 0           |
| RP11-423H2.3 | DTX4     | -0.593942136 | 0           |
| RP11-423H2.3 | CST6     | -0.510974506 | 0           |
| RP11-423H2.3 | QPCT     | -0.594138439 | 0           |
| RP11-423H2.3 | TIMP1    | -0.619364598 | 0           |
| RP11-423H2.3 | CAMK2N1  | -0.724878942 | 0           |
| RP11-423H2.3 | KLHDC8A  | -0.422587989 | 0           |
| RP11-423H2.3 | PDLIM4   | -0.613376518 | 0           |
| RP11-423H2.3 | SCEL     | -0.511934034 | 0           |
| RP11-423H2.3 | LCN2     | -0.504068314 | 0           |
| RP11-423H2.3 | PROS1    | -0.63441834  | 0           |
| RP11-423H2.3 | GABRB2   | -0.672856345 | 0           |
| RP11-423H2.3 | TMPRSS6  | -0.570101158 | 0           |
| RP11-423H2.3 | KLK7     | -0.551846681 | 2.37E-36    |
| RP11-423H2.3 | PDZK1IP1 | -0.490597049 | 0           |
| RP11-423H2.3 | CDH3     | -0.672666141 | 0           |
| RP11-423H2.3 | LRP4     | -0.551452838 | 0           |
| RP11-423H2.3 | IGSF1    | -0.320945657 | 7.40E-12    |
| RP11-423H2.3 | B3GNT3   | -0.493831503 | 0           |
| RP11-423H2.3 | CLDN1    | -0.57484249  | 0           |
| RP11-423H2.3 | GDF15    | -0.413443181 | 0           |



|               |           |              |          |
|---------------|-----------|--------------|----------|
| RP11-423H2.3  | ARHGAP36  | -0.291485055 | 4.80E-10 |
| RP11-423H2.3  | LAMB3     | -0.591348219 | 0        |
| RP11-423H2.3  | KLK10     | -0.592689856 | 0        |
| RP11-423H2.3  | DPP4      | -0.518552297 | 0        |
| RP11-423H2.3  | METTL7B   | -0.552650794 | 0        |
| RP11-423H2.3  | LIPH      | -0.588987056 | 0        |
| RP11-423H2.3  | CLDN16    | -0.49541015  | 0        |
| RP11-423H2.3  | CHI3L1    | -0.574823626 | 0        |
| RP11-423H2.3  | SLC22A31  | -0.491668945 | 4.24E-28 |
| RP11-423H2.3  | TACSTD2   | -0.601423761 | 0        |
| RP11-423H2.3  | SFTPB     | -0.516199928 | 0        |
| RP11-423H2.3  | RXRG      | -0.55012581  | 0        |
| RP11-423H2.3  | DCSTAMP   | -0.633059404 | 1.53E-50 |
| RP11-423H2.3  | CITED1    | -0.493849942 | 0        |
| RP11-423H2.3  | SERPINA1  | -0.654529001 | 0        |
| RP11-423H2.3  | PRR15     | -0.559331323 | 0        |
| RP11-423H2.3  | SLC34A2   | -0.549979434 | 0        |
| RP11-423H2.3  | FN1       | -0.65607531  | 0        |
| RP11-423H2.3  | ZCCHC12   | -0.408398177 | 0        |
| RP11-192H23.8 | TFF3      | 0.630376691  | 0        |
| RP11-192H23.8 | CCL21     | 0.422587358  | 1.92E-20 |
| RP11-192H23.8 | TPO       | 0.584888105  | 0        |
| RP11-192H23.8 | MT1G      | 0.533195846  | 0        |
| RP11-192H23.8 | DI01      | 0.596415918  | 0        |
| RP11-192H23.8 | DPT       | 0.360725639  | 6.16E-15 |
| RP11-192H23.8 | CDH16     | 0.579414752  | 0        |
| RP11-192H23.8 | CRABP1    | 0.417230812  | 6.42E-20 |
| RP11-192H23.8 | SLC26A7   | 0.491922092  | 0        |
| RP11-192H23.8 | MT1H      | 0.513276596  | 7.11E-31 |
| RP11-192H23.8 | SLC26A4   | 0.516130002  | 0        |
| RP11-192H23.8 | SLC5A8    | 0.484020652  | 3.66E-27 |
| RP11-192H23.8 | PKHD1L1   | 0.562443926  | 5.51E-38 |
| RP11-192H23.8 | TFCP2L1   | 0.479308232  | 0        |
| RP11-192H23.8 | WSCD2     | 0.554309954  | 1.00E-36 |
| RP11-192H23.8 | IPCEF1    | 0.519392682  | 0        |
| RP11-192H23.8 | SLC5A5    | 0.550852658  | 3.35E-36 |
| RP11-192H23.8 | MT1F      | 0.610561193  | 0        |
| RP11-192H23.8 | FOSB      | 0.332428081  | 1.17E-12 |
| RP11-192H23.8 | SEMA3D    | 0.539892492  | 1.41E-34 |
| RP11-192H23.8 | BMP8A     | 0.497242119  | 0        |
| RP11-192H23.8 | MATN2     | 0.475969953  | 0        |
| RP11-192H23.8 | PLA2R1    | 0.459753288  | 0        |
| RP11-192H23.8 | COL23A1   | 0.50095428   | 0        |
| RP11-192H23.8 | HGD       | 0.547444662  | 0        |
| RP11-192H23.8 | TCEAL2    | 0.407013562  | 0        |
| RP11-192H23.8 | CHRDL1    | 0.328226381  | 1.74E-12 |
| RP11-192H23.8 | TNFRSF11B | 0.393934193  | 0        |
| RP11-192H23.8 | FAM167A   | 0.45431809   | 0        |
| RP11-192H23.8 | KIT       | 0.525151837  | 0        |
| RP11-192H23.8 | SLC4A4    | 0.525733794  | 0        |
| RP11-192H23.8 | SMOC2     | 0.437920441  | 0        |

|               |            |             |          |
|---------------|------------|-------------|----------|
| RP11-192H23.8 | FHL1       | 0.530529875 | 0        |
| RP11-192H23.8 | OTOS       | 0.605616892 | 0        |
| RP11-192H23.8 | IGFBPL1    | 0.416206228 | 8.06E-20 |
| RP11-192H23.8 | HBB        | 0.329766224 | 1.81E-12 |
| RP11-192H23.8 | BEX1       | 0.416769546 | 0        |
| RP11-192H23.8 | FABP4      | 0.436090804 | 8.34E-22 |
| RP11-192H23.8 | LMOD1      | 0.532910044 | 0        |
| RP11-192H23.8 | SOD3       | 0.521673139 | 0        |
| RP11-192H23.8 | TMEM171    | 0.51901653  | 0        |
| RP11-192H23.8 | PI16       | 0.377423926 | 1.52E-16 |
| RP11-192H23.8 | ZMAT4      | 0.61568116  | 3.73E-47 |
| RP11-192H23.8 | MFAP4      | 0.248101226 | 1.53E-07 |
| RP11-192H23.8 | CWH43      | 0.508780446 | 2.79E-30 |
| RP11-192H23.8 | SPX        | 0.475563874 | 0        |
| RP11-192H23.8 | APOD       | 0.340734348 | 2.92E-13 |
| RP11-192H23.8 | DPP6       | 0.524329749 | 0        |
| RP11-192H23.8 | MMRN1      | 0.387291819 | 0        |
| RP11-192H23.8 | WDR72      | 0.389669293 | 0        |
| RP11-192H23.8 | MPPED2     | 0.566914929 | 0        |
| RP11-192H23.8 | PAPSS2     | 0.416507147 | 0        |
| RP11-192H23.8 | DCN        | 0.203143678 | 1.87E-05 |
| RP11-192H23.8 | SORBS2     | 0.545044636 | 0        |
| RP11-192H23.8 | EGR2       | 0.239341081 | 4.22E-07 |
| RP11-192H23.8 | EDN3       | 0.427835915 | 5.77E-21 |
| RP11-192H23.8 | DIO2       | 0.372330838 | 6.24E-16 |
| RP11-192H23.8 | ITPR1      | 0.534678186 | 0        |
| RP11-192H23.8 | CFD        | 0.371091891 | 8.42E-16 |
| RP11-192H23.8 | CPXM1      | 0.422496787 | 0        |
| RP11-192H23.8 | ELMO1      | 0.574866744 | 0        |
| RP11-192H23.8 | GPC3       | 0.47320755  | 7.03E-26 |
| RP11-192H23.8 | MYOC       | 0.260151395 | 3.19E-08 |
| RP11-192H23.8 | DEPTOR     | 0.555778728 | 0        |
| RP11-192H23.8 | DGKI       | 0.518886181 | 0        |
| RP11-192H23.8 | CARTPT     | 0.499938977 | 3.87E-29 |
| RP11-192H23.8 | IYD        | 0.355969074 | 1.92E-14 |
| RP11-192H23.8 | LYVE1      | 0.396432938 | 0        |
| RP11-192H23.8 | CLCNKB     | 0.553089071 | 0        |
| RP11-192H23.8 | NCAM1      | 0.352267834 | 3.81E-14 |
| RP11-192H23.8 | HBA2       | 0.38227121  | 1.41E-17 |
| RP11-192H23.8 | GLT8D2     | 0.431502311 | 0        |
| RP11-192H23.8 | OGDHL      | 0.412667474 | 0        |
| RP11-192H23.8 | LIFR       | 0.367189384 | 2.03E-15 |
| RP11-192H23.8 | CSGALNACT1 | 0.472577351 | 0        |
| RP11-192H23.8 | RAP1GAP    | 0.385120576 | 0        |
| RP11-192H23.8 | COL9A3     | 0.522538346 | 0        |
| RP11-192H23.8 | FBLN1      | 0.26099947  | 3.23E-08 |
| RP11-192H23.8 | EFEMP1     | 0.45026637  | 0        |
| RP11-192H23.8 | AOX1       | 0.451029754 | 2.19E-23 |
| RP11-192H23.8 | GRIN2C     | 0.589017976 | 0        |
| RP11-192H23.8 | C11orf74   | 0.613562183 | 0        |
| RP11-192H23.8 | PPARGC1A   | 0.46239926  | 0        |

|               |          |             |             |
|---------------|----------|-------------|-------------|
| RP11-192H23.8 | ANGPTL1  | 0.447201128 | 0           |
| RP11-192H23.8 | SCARA5   | 0.337158515 | 3.94E-13    |
| RP11-192H23.8 | LTF      | 0.463378929 | 0           |
| RP11-192H23.8 | CA4      | 0.44779452  | 4.90E-23    |
| RP11-192H23.8 | TG       | 0.356952431 | 1.59E-14    |
| RP11-192H23.8 | FCGBP    | 0.560245322 | 0           |
| RP11-192H23.8 | PBX4     | 0.715270753 | 0           |
| RP11-192H23.8 | CYR61    | 0.352980424 | 3.35E-14    |
| RP11-192H23.8 | FOS      | 0.362123671 | 5.81E-15    |
| RP11-192H23.8 | KHDRBS2  | 0.552367262 | 0           |
| RP11-192H23.8 | MUM1L1   | 0.470859278 | 0           |
| RP11-192H23.8 | RGS16    | 0.512426635 | 0           |
| RP11-192H23.8 | MT1M     | 0.515739241 | 0           |
| RP11-192H23.8 | LRP2     | 0.419066315 | 0           |
| RP11-192H23.8 | MAFB     | 0.446743703 | 0           |
| RP11-192H23.8 | KCNK2    | 0.45702576  | 0           |
| RP11-192H23.8 | TBC1D4   | 0.454945719 | 0           |
| RP11-192H23.8 | MIOX     | 0.593849821 | 3.46E-43    |
| RP11-192H23.8 | TPPP     | 0.465988874 | 0           |
| RP11-192H23.8 | FMOD     | 0.473285827 | 0           |
| RP11-192H23.8 | CITED2   | 0.36520338  | 3.10E-15    |
| RP11-192H23.8 | RGS8     | 0.515826305 | 3.24E-31    |
| RP11-192H23.8 | ABI3BP   | 0.32572188  | 3.47E-12    |
| RP11-192H23.8 | ADH1B    | 0.368442254 | 1.46E-15    |
| RP11-192H23.8 | OGN      | 0.264544625 | 1.83E-08    |
| RP11-192H23.8 | NR4A1    | 0.32327987  | 5.12E-12    |
| RP11-192H23.8 | FOXJ1    | 0.547696252 | 9.96E-36    |
| RP11-192H23.8 | ALDH1A1  | 0.513049016 | 0           |
| RP11-192H23.8 | OCA2     | 0.52983787  | 3.85E-33    |
| RP11-192H23.8 | TMEM139  | 0.443679879 | 0           |
| RP11-192H23.8 | ARHGAP24 | 0.486039822 | 0           |
| RP11-192H23.8 | SLC25A15 | 0.37856458  | 1.03E-16    |
| RP11-192H23.8 | DES      | 0.323122301 | 3.98E-12    |
| RP11-192H23.8 | GDF10    | 0.417994719 | 5.41E-20    |
| RP11-192H23.8 | KIAA1324 | 0.539049464 | 0           |
| RP11-192H23.8 | JUN      | 0.374114582 | 3.97E-16    |
| RP11-192H23.8 | C7       | 0.154356102 | 0.001191073 |
| RP11-192H23.8 | LGI3     | 0.512524928 | 0           |
| RP11-192H23.8 | CDON     | 0.518379255 | 0           |
| RP11-192H23.8 | BCL2     | 0.481824706 | 0           |
| RP11-192H23.8 | HLF      | 0.514308246 | 0           |
| RP11-192H23.8 | EGR1     | 0.291093196 | 6.12E-10    |
| RP11-192H23.8 | IP6K3    | 0.444532888 | 0           |
| RP11-192H23.8 | SCUBE3   | 0.475330693 | 0           |
| RP11-192H23.8 | PKNOX2   | 0.558757734 | 0           |
| RP11-192H23.8 | SMAD9    | 0.469226449 | 0           |
| RP11-192H23.8 | IQGAP2   | 0.433633555 | 0           |
| RP11-192H23.8 | GNA14    | 0.560771537 | 0           |
| RP11-192H23.8 | LAYN     | 0.524965179 | 0           |
| RP11-192H23.8 | AVPR1A   | 0.441801672 | 0           |
| RP11-192H23.8 | PDLIM3   | 0.490889092 | 0           |

|               |          |             |             |
|---------------|----------|-------------|-------------|
| RP11-192H23.8 | GPM6A    | 0.368968021 | 1.37E-15    |
| RP11-192H23.8 | SDPR     | 0.323377454 | 5.04E-12    |
| RP11-192H23.8 | CRYAB    | 0.258890351 | 4.19E-08    |
| RP11-192H23.8 | FOXA2    | 0.569030425 | 4.97E-39    |
| RP11-192H23.8 | C8orf88  | 0.405342863 | 0           |
| RP11-192H23.8 | ISM1     | 0.422252118 | 0           |
| RP11-192H23.8 | BMP2     | 0.378803292 | 9.47E-17    |
| RP11-192H23.8 | ID4      | 0.557313264 | 0           |
| RP11-192H23.8 | NUPR1    | 0.33781463  | 4.79E-13    |
| RP11-192H23.8 | SERTM1   | 0.409545528 | 3.49E-19    |
| RP11-192H23.8 | IRS1     | 0.430032027 | 0           |
| RP11-192H23.8 | FIBIN    | 0.233995807 | 7.68E-07    |
| RP11-192H23.8 | PODN     | 0.257290429 | 5.10E-08    |
| RP11-192H23.8 | TDRD9    | 0.385539704 | 0           |
| RP11-192H23.8 | EPHA3    | 0.322795638 | 5.53E-12    |
| RP11-192H23.8 | AIF1L    | 0.37256033  | 5.90E-16    |
| RP11-192H23.8 | EBF4     | 0.604961321 | 0           |
| RP11-192H23.8 | ADM2     | 0.482455456 | 0           |
| RP11-192H23.8 | GSTM3    | 0.471928446 | 0           |
| RP11-192H23.8 | HSD17B6  | 0.542116267 | 0           |
| RP11-192H23.8 | AGR3     | 0.424082655 | 1.37E-20    |
| RP11-192H23.8 | EPHB1    | 0.280313006 | 2.67E-09    |
| RP11-192H23.8 | TMOD1    | 0.299625266 | 1.82E-10    |
| RP11-192H23.8 | WASF3    | 0.407315959 | 0           |
| RP11-192H23.8 | SELV     | 0.642714077 | 1.61E-52    |
| RP11-192H23.8 | ENPP1    | 0.243921853 | 2.50E-07    |
| RP11-192H23.8 | SYNE1    | 0.486112247 | 2.04E-27    |
| RP11-192H23.8 | PLCH1    | 0.488065115 | 0           |
| RP11-192H23.8 | CCDC146  | 0.607889832 | 0           |
| RP11-192H23.8 | SLC16A2  | 0.494708198 | 0           |
| RP11-192H23.8 | IER2     | 0.514368952 | 0           |
| RP11-192H23.8 | KCNAB1   | 0.481095663 | 0           |
| RP11-192H23.8 | SYNDIG1  | 0.501909837 | 0           |
| RP11-192H23.8 | C16orf89 | 0.507483753 | 0           |
| RP11-192H23.8 | CTGF     | 0.252091105 | 9.55E-08    |
| RP11-192H23.8 | NR4A3    | 0.201698783 | 2.15E-05    |
| RP11-192H23.8 | KIAA1456 | 0.478643583 | 0           |
| RP11-192H23.8 | AQP4     | 0.340107569 | 3.25E-13    |
| RP11-192H23.8 | RNF150   | 0.506465362 | 0           |
| RP11-192H23.8 | C1S      | 0.158011529 | 0.000905029 |
| RP11-192H23.8 | PFKFB2   | 0.312907037 | 2.55E-11    |
| RP11-192H23.8 | PROX1    | 0.438016181 | 0           |
| RP11-192H23.8 | TCF7L1   | 0.603040421 | 0           |
| RP11-192H23.8 | HSPB6    | 0.333370731 | 1.00E-12    |
| RP11-192H23.8 | FHDC1    | 0.399196209 | 0           |
| RP11-192H23.8 | PRR15L   | 0.359636982 | 9.50E-15    |
| RP11-192H23.8 | SLC1A1   | 0.306080274 | 7.10E-11    |
| RP11-192H23.8 | BTBD11   | 0.512373588 | 0           |
| RP11-192H23.8 | TRIM58   | 0.343861714 | 1.70E-13    |
| RP11-192H23.8 | LRIG1    | 0.420839704 | 0           |
| RP11-192H23.8 | ROR2     | 0.419104752 | 0           |

|               |          |             |             |
|---------------|----------|-------------|-------------|
| RP11-192H23.8 | GPR125   | 0.518219263 | 0           |
| RP11-192H23.8 | FLRT1    | 0.595130448 | 0           |
| RP11-192H23.8 | PGF      | 0.545147184 | 0           |
| RP11-192H23.8 | DUSP1    | 0.336454696 | 6.02E-13    |
| RP11-192H23.8 | PLA2G7   | 0.425749113 | 0           |
| RP11-192H23.8 | PLSCR4   | 0.357547721 | 1.42E-14    |
| RP11-192H23.8 | FAM46B   | 0.449405986 | 0           |
| RP11-192H23.8 | GLDC     | 0.500577561 | 0           |
| RP11-192H23.8 | ZBTB16   | 0.284407702 | 1.54E-09    |
| RP11-192H23.8 | OMD      | 0.217985869 | 4.03E-06    |
| RP11-192H23.8 | HSD11B2  | 0.542106905 | 0           |
| RP11-192H23.8 | FGL2     | 0.21867839  | 3.96E-06    |
| RP11-192H23.8 | CLCNKA   | 0.601531153 | 1.51E-44    |
| RP11-192H23.8 | GATM     | 0.314185131 | 2.10E-11    |
| RP11-192H23.8 | TNS3     | 0.361391224 | 6.73E-15    |
| RP11-192H23.8 | TOB1     | 0.433917088 | 0           |
| RP11-192H23.8 | MARC2    | 0.495774388 | 0           |
| RP11-192H23.8 | LRRC2    | 0.459474295 | 0           |
| RP11-192H23.8 | SORD     | 0.275145312 | 5.30E-09    |
| RP11-192H23.8 | RIMS4    | 0.359819668 | 9.17E-15    |
| RP11-192H23.8 | SLC29A4  | 0.611299313 | 0           |
| RP11-192H23.8 | SLC39A14 | 0.277529452 | 3.87E-09    |
| RP11-192H23.8 | FAXDC2   | 0.557147882 | 0           |
| RP11-192H23.8 | HSPB8    | 0.382087956 | 1.67E-17    |
| RP11-192H23.8 | CCL19    | 0.096987491 | 0.042243803 |
| RP11-192H23.8 | KCNIP3   | 0.534657336 | 0           |
| RP11-192H23.8 | CGNL1    | 0.374059833 | 4.02E-16    |
| RP11-192H23.8 | ATF3     | 0.180838655 | 0.000142583 |
| RP11-192H23.8 | SGCD     | 0.431482737 | 0           |
| RP11-192H23.8 | STARD13  | 0.450018439 | 0           |
| RP11-192H23.8 | LDHD     | 0.522194816 | 0           |
| RP11-192H23.8 | RCAN1    | 0.361225416 | 6.96E-15    |
| RP11-192H23.8 | ID3      | 0.519613239 | 0           |
| RP11-192H23.8 | SYTL3    | 0.438021287 | 0           |
| RP11-192H23.8 | MT1E     | 0.471833557 | 0           |
| RP11-192H23.8 | CAMK1D   | 0.411643836 | 0           |
| RP11-192H23.8 | PRKCQ    | 0.465272455 | 0           |
| RP11-192H23.8 | NUAK2    | 0.403422955 | 0           |
| RP11-192H23.8 | LIPG     | 0.370384833 | 9.93E-16    |
| RP11-192H23.8 | SLC25A25 | 0.227865181 | 1.50E-06    |
| RP11-192H23.8 | PRKX     | 0.237354369 | 5.28E-07    |
| RP11-192H23.8 | SRPX     | 0.277849579 | 3.71E-09    |
| RP11-192H23.8 | FAM189A1 | 0.396038773 | 0           |
| RP11-192H23.8 | PLEKHH1  | 0.509862645 | 0           |
| RP11-192H23.8 | WNT11    | 0.525187296 | 0           |
| RP11-192H23.8 | SNAI1    | 0.448794526 | 0           |
| RP11-192H23.8 | FDCSP    | 0.085147734 | 0.074717536 |
| RP11-192H23.8 | MT1X     | 0.377893548 | 1.31E-16    |
| RP11-192H23.8 | ACACB    | 0.496498609 | 0           |
| RP11-192H23.8 | ARC      | 0.179757005 | 0.000156449 |
| RP11-192H23.8 | KLK4     | 0.29858722  | 1.72E-10    |

|               |          |             |             |
|---------------|----------|-------------|-------------|
| RP11-192H23.8 | ZFPM2    | 0.349902842 | 5.86E-14    |
| RP11-192H23.8 | AKAP12   | 0.214090668 | 6.34E-06    |
| RP11-192H23.8 | GJB6     | 0.347283017 | 6.89E-14    |
| RP11-192H23.8 | ERO1LB   | 0.508758727 | 0           |
| RP11-192H23.8 | DNALI1   | 0.592972396 | 0           |
| RP11-192H23.8 | HKDC1    | 0.351244337 | 4.59E-14    |
| RP11-192H23.8 | ZFP36L2  | 0.46046914  | 0           |
| RP11-192H23.8 | CAPSL    | 0.531041361 | 2.61E-33    |
| RP11-192H23.8 | CYP7B1   | 0.315432022 | 1.74E-11    |
| RP11-192H23.8 | CPQ      | 0.4679241   | 0           |
| RP11-192H23.8 | RPS6KA6  | 0.505934129 | 6.56E-30    |
| RP11-192H23.8 | TLE1     | 0.481464582 | 0           |
| RP11-192H23.8 | TP53INP2 | 0.474246774 | 0           |
| RP11-192H23.8 | KATNAL2  | 0.560990817 | 0           |
| RP11-192H23.8 | SGPP2    | 0.15956039  | 0.000804193 |
| RP11-192H23.8 | CTH      | 0.515422519 | 0           |
| RP11-192H23.8 | KIF12    | 0.56918872  | 0           |
| RP11-192H23.8 | TMEM220  | 0.496061892 | 0           |
| RP11-192H23.8 | CENPJ    | 0.589809428 | 0           |
| RP11-192H23.8 | FAM155B  | 0.385076039 | 0           |
| RP11-192H23.8 | WFS1     | 0.53640789  | 0           |
| RP11-192H23.8 | SELENBP1 | 0.544304672 | 0           |
| RP11-192H23.8 | SNTA1    | 0.452531084 | 0           |
| RP11-192H23.8 | FRAS1    | 0.312522658 | 2.71E-11    |
| RP11-192H23.8 | FBLN7    | 0.556299838 | 0           |
| RP11-192H23.8 | AGPAT9   | 0.351219657 | 4.62E-14    |
| RP11-192H23.8 | GPR83    | 0.481172114 | 0           |
| RP11-192H23.8 | PRTG     | 0.359292885 | 1.02E-14    |
| RP11-192H23.8 | EGR3     | 0.178699183 | 0.000171224 |
| RP11-192H23.8 | GRAMD2   | 0.537350681 | 0           |
| RP11-192H23.8 | HYOU1    | 0.34869524  | 7.27E-14    |
| RP11-192H23.8 | FBLN5    | 0.340560313 | 3.01E-13    |
| RP11-192H23.8 | ITM2A    | 0.389583339 | 0           |
| RP11-192H23.8 | SRF      | 0.450997541 | 0           |
| RP11-192H23.8 | FGFR2    | 0.318815688 | 1.03E-11    |
| RP11-192H23.8 | MT1A     | 0.308620872 | 3.85E-11    |
| RP11-192H23.8 | MAMDC2   | 0.334214946 | 8.74E-13    |
| RP11-192H23.8 | FHL2     | 0.399935039 | 0           |
| RP11-192H23.8 | FTCDNL1  | 0.371795261 | 7.11E-16    |
| RP11-192H23.8 | PKIA     | 0.275245733 | 5.23E-09    |
| RP11-192H23.8 | DNAJB4   | 0.297325945 | 2.54E-10    |
| RP11-192H23.8 | SLC25A33 | 0.561341723 | 0           |
| RP11-192H23.8 | EYA2     | 0.302495341 | 1.20E-10    |
| RP11-192H23.8 | LPAR1    | 0.249488252 | 1.30E-07    |
| RP11-192H23.8 | STX11    | 0.224187486 | 2.23E-06    |
| RP11-192H23.8 | ARHGEF28 | 0.376292065 | 2.16E-16    |
| RP11-192H23.8 | OR2W3    | 0.467662127 | 0           |
| RP11-192H23.8 | ALDH1B1  | 0.26145818  | 2.70E-08    |
| RP11-192H23.8 | CXCL12   | 0.208924534 | 1.06E-05    |
| RP11-192H23.8 | OLFM2    | 0.533341371 | 0           |
| RP11-192H23.8 | TUB      | 0.311262719 | 3.27E-11    |

|               |          |             |             |
|---------------|----------|-------------|-------------|
| RP11-192H23.8 | HTRA3    | 0.39664229  | 0           |
| RP11-192H23.8 | CKB      | 0.540513223 | 0           |
| RP11-192H23.8 | RGS2     | 0.170737581 | 0.000332344 |
| RP11-192H23.8 | SHANK2   | 0.48941895  | 0           |
| RP11-192H23.8 | CNTFR    | 0.431122809 | 2.69E-21    |
| RP11-192H23.8 | CYTH3    | 0.395745453 | 0           |
| RP11-192H23.8 | PLAC9    | 0.421381097 | 0           |
| RP11-192H23.8 | WVOX     | 0.486560648 | 0           |
| RP11-192H23.8 | NPR3     | 0.387703714 | 0           |
| RP11-192H23.8 | SDC2     | 0.391454171 | 0           |
| RP11-192H23.8 | KLF15    | 0.430444631 | 0           |
| RP11-192H23.8 | TMEM164  | 0.476480851 | 0           |
| RP11-192H23.8 | LONRF3   | 0.175930948 | 0.000216323 |
| RP11-192H23.8 | GBP1     | 0.205843264 | 1.44E-05    |
| RP11-192H23.8 | ARHGAP6  | 0.342362212 | 2.21E-13    |
| RP11-192H23.8 | TMEM119  | 0.183224355 | 0.000115976 |
| RP11-192H23.8 | SH3RF1   | 0.279767784 | 2.87E-09    |
| RP11-192H23.8 | CRELD2   | 0.517209666 | 0           |
| RP11-192H23.8 | PCP4     | 0.144228222 | 0.002473378 |
| RP11-192H23.8 | GCSH     | 0.516947835 | 0           |
| RP11-192H23.8 | IMPA2    | 0.452269536 | 0           |
| RP11-192H23.8 | C1R      | 0.184276928 | 0.000105789 |
| RP11-192H23.8 | SUCNR1   | 0.296569669 | 2.82E-10    |
| RP11-192H23.8 | SFRP1    | 0.32673871  | 2.95E-12    |
| RP11-192H23.8 | UGT8     | 0.343950788 | 1.68E-13    |
| RP11-192H23.8 | TLE4     | 0.303006238 | 1.12E-10    |
| RP11-192H23.8 | ANTXR1   | 0.261863825 | 2.90E-08    |
| RP11-192H23.8 | GPX3     | 0.444712454 | 0           |
| RP11-192H23.8 | DPY19L2  | 0.647190632 | 0           |
| RP11-192H23.8 | FAM46C   | 0.285909332 | 1.25E-09    |
| RP11-192H23.8 | IL33     | 0.283576263 | 1.46E-09    |
| RP11-192H23.8 | PEG3     | 0.358747521 | 1.13E-14    |
| RP11-192H23.8 | FAHD2A   | 0.60236485  | 0           |
| RP11-192H23.8 | PTGDS    | 0.081658615 | 0.087464219 |
| RP11-192H23.8 | CHCHD10  | 0.441784793 | 0           |
| RP11-192H23.8 | CD36     | 0.387260898 | 0           |
| RP11-192H23.8 | ANKRD37  | 0.60847874  | 0           |
| RP11-192H23.8 | TSPAN33  | 0.493652363 | 0           |
| RP11-192H23.8 | PRDM16   | 0.502429812 | 0           |
| RP11-192H23.8 | UST      | 0.384895906 | 0           |
| RP11-192H23.8 | NEXN     | 0.410129299 | 0           |
| RP11-192H23.8 | NUPR1L   | 0.245530586 | 1.89E-07    |
| RP11-192H23.8 | SLC24A3  | 0.443639739 | 0           |
| RP11-192H23.8 | MARC1    | 0.425290412 | 0           |
| RP11-192H23.8 | MYH11    | 0.334272957 | 8.65E-13    |
| RP11-192H23.8 | APOA1    | 0.646681389 | 2.36E-53    |
| RP11-192H23.8 | TMEM178B | 0.402102594 | 0           |
| RP11-192H23.8 | CAPNG    | 0.361239572 | 5.60E-15    |
| RP11-192H23.8 | PPM1L    | 0.391999393 | 0           |
| RP11-192H23.8 | FZD8     | 0.552782135 | 0           |
| RP11-192H23.8 | RCAN2    | 0.448437097 | 0           |

|               |          |             |             |
|---------------|----------|-------------|-------------|
| RP11-192H23.8 | COPZ2    | 0.483400091 | 0           |
| RP11-192H23.8 | GAS1     | 0.273593614 | 6.50E-09    |
| RP11-192H23.8 | DACT1    | 0.501613823 | 0           |
| RP11-192H23.8 | WBSCR17  | 0.525293106 | 0           |
| RP11-192H23.8 | NCS1     | 0.384034671 | 0           |
| RP11-192H23.8 | SPIRE2   | 0.688973865 | 0           |
| RP11-192H23.8 | C15orf52 | 0.408662703 | 0           |
| RP11-192H23.8 | SPAG5    | 0.822951234 | 0           |
| RP11-192H23.8 | ARL4D    | 0.465533577 | 0           |
| RP11-192H23.8 | FAM189A2 | 0.429849908 | 0           |
| RP11-192H23.8 | MAP1LC3A | 0.575678762 | 0           |
| RP11-192H23.8 | KLF6     | 0.113867274 | 0.017039349 |
| RP11-192H23.8 | ADD3     | 0.193249262 | 4.73E-05    |
| RP11-192H23.8 | TSPAN7   | 0.331281612 | 1.42E-12    |
| RP11-192H23.8 | KLF9     | 0.276844521 | 4.24E-09    |
| RP11-192H23.8 | KCNQ1    | 0.428928676 | 0           |
| RP11-192H23.8 | MAN1A1   | 0.194708766 | 4.14E-05    |
| RP11-192H23.8 | MLF1     | 0.309979093 | 3.97E-11    |
| RP11-192H23.8 | RARB     | 0.465270327 | 0           |
| RP11-192H23.8 | CDC42EP2 | 0.563611684 | 0           |
| RP11-192H23.8 | FAM3B    | 0.29826363  | 2.22E-10    |
| RP11-192H23.8 | GADD45B  | 0.345615105 | 1.25E-13    |
| RP11-192H23.8 | TMEM47   | 0.358626676 | 1.16E-14    |
| RP11-192H23.8 | SDF2L1   | 0.425347288 | 0           |
| RP11-192H23.8 | CCDC85A  | 0.19586715  | 3.72E-05    |
| RP11-192H23.8 | CRYBG3   | 0.028404871 | 0.552655615 |
| RP11-192H23.8 | FBLN2    | 0.110689555 | 0.020397359 |
| RP11-192H23.8 | PEBP4    | 0.198332421 | 2.95E-05    |
| RP11-192H23.8 | CDADC1   | 0.483555261 | 0           |
| RP11-192H23.8 | FAM63A   | 0.40121214  | 0           |
| RP11-192H23.8 | GLUL     | 0.351575243 | 4.33E-14    |
| RP11-192H23.8 | FREM2    | 0.300307787 | 1.65E-10    |
| RP11-192H23.8 | ACKR3    | 0.427859791 | 0           |
| RP11-192H23.8 | DENND6A  | 0.489932542 | 0           |
| RP11-192H23.8 | CLDN8    | 0.231073679 | 1.06E-06    |
| RP11-192H23.8 | UTS2R    | 0.226142261 | 1.69E-06    |
| RP11-192H23.8 | SCNN1B   | 0.413325457 | 0           |
| RP11-192H23.8 | TTC30A   | 0.433284069 | 0           |
| RP11-192H23.8 | CORO2B   | 0.455296908 | 0           |
| RP11-192H23.8 | TC2N     | 0.304727006 | 8.67E-11    |
| RP11-192H23.8 | ALDH2    | 0.501266038 | 0           |
| RP11-192H23.8 | GPR183   | 0.069241767 | 0.147462106 |
| RP11-192H23.8 | C4orf47  | 0.603808469 | 0           |
| RP11-192H23.8 | SLC25A42 | 0.513997623 | 0           |
| RP11-192H23.8 | LGMN     | 0.407879478 | 0           |
| RP11-192H23.8 | ACSF2    | 0.547696707 | 0           |
| RP11-192H23.8 | KIAA1467 | 0.358760003 | 1.13E-14    |
| RP11-192H23.8 | PRKG1    | 0.427048625 | 0           |
| RP11-192H23.8 | GNAI1    | 0.449536902 | 0           |
| RP11-192H23.8 | ABCC4    | 0.25017063  | 1.20E-07    |
| RP11-192H23.8 | PRPS1    | 0.385161709 | 0           |



|               |          |              |             |
|---------------|----------|--------------|-------------|
| RP11-192H23.8 | TSPAN5   | 0.433572423  | 0           |
| RP11-192H23.8 | CR2      | 0.185102021  | 9.58E-05    |
| RP11-192H23.8 | CCDC170  | 0.422656212  | 0           |
| RP11-192H23.8 | RRAD     | 0.217126692  | 4.65E-06    |
| RP11-192H23.8 | SCGB2A1  | 0.501284335  | 0           |
| RP11-192H23.8 | SESN3    | 0.268329896  | 1.28E-08    |
| RP11-192H23.8 | SGK223   | 0.31429775   | 2.07E-11    |
| RP11-192H23.8 | NDRG2    | 0.486192439  | 0           |
| RP11-192H23.8 | C3orf52  | 0.301005909  | 1.49E-10    |
| RP11-192H23.8 | FLRT3    | -0.279276177 | 3.07E-09    |
| RP11-192H23.8 | MST1R    | -0.398708857 | 0           |
| RP11-192H23.8 | SDC1     | -0.308396049 | 5.03E-11    |
| RP11-192H23.8 | ST8SIA4  | -0.408057909 | 0           |
| RP11-192H23.8 | UBTD1    | -0.24669789  | 1.81E-07    |
| RP11-192H23.8 | EPHA2    | -0.327441088 | 2.64E-12    |
| RP11-192H23.8 | TMEM130  | -0.243673497 | 2.57E-07    |
| RP11-192H23.8 | SPINK2   | -0.386154427 | 0           |
| RP11-192H23.8 | MMP16    | -0.373869345 | 4.23E-16    |
| RP11-192H23.8 | SIGLEC15 | -0.481238919 | 0           |
| RP11-192H23.8 | RIN1     | -0.353306649 | 3.15E-14    |
| RP11-192H23.8 | IL1RN    | -0.422977473 | 0           |
| RP11-192H23.8 | FCER1G   | -0.241652885 | 3.24E-07    |
| RP11-192H23.8 | CD276    | -0.433403212 | 0           |
| RP11-192H23.8 | CTSB     | -0.478758188 | 0           |
| RP11-192H23.8 | FAM171A2 | -0.2951808   | 3.44E-10    |
| RP11-192H23.8 | ASPHD1   | -0.40919672  | 0           |
| RP11-192H23.8 | C15orf48 | -0.223492059 | 2.40E-06    |
| RP11-192H23.8 | DYSF     | -0.284665137 | 1.48E-09    |
| RP11-192H23.8 | PDZRN4   | -0.187792362 | 7.75E-05    |
| RP11-192H23.8 | EFHD2    | -0.144517002 | 0.002423857 |
| RP11-192H23.8 | ASF1B    | -0.309518548 | 4.26E-11    |
| RP11-192H23.8 | AQP1     | -0.255946096 | 6.00E-08    |
| RP11-192H23.8 | ARRDC2   | -0.215023956 | 5.77E-06    |
| RP11-192H23.8 | PRSS1    | -0.371816579 | 7.70E-16    |
| RP11-192H23.8 | MAPK13   | -0.458957299 | 0           |
| RP11-192H23.8 | CST5     | -0.32809878  | 1.78E-12    |
| RP11-192H23.8 | AHR      | -0.443757606 | 0           |
| RP11-192H23.8 | BAX      | -0.195871121 | 3.72E-05    |
| RP11-192H23.8 | C1orf115 | -0.351966714 | 4.03E-14    |
| RP11-192H23.8 | PLK3     | -0.329982951 | 1.75E-12    |
| RP11-192H23.8 | JAG2     | -0.206691876 | 1.32E-05    |
| RP11-192H23.8 | RAD23B   | -0.617549792 | 0           |
| RP11-192H23.8 | CA12     | 0.059580247  | 0.212713942 |
| RP11-192H23.8 | ADTRP    | -0.402004726 | 0           |
| RP11-192H23.8 | UCP2     | -0.254839483 | 6.86E-08    |
| RP11-192H23.8 | IGFBP2   | -0.244519555 | 2.33E-07    |
| RP11-192H23.8 | LOXL2    | -0.223269232 | 2.45E-06    |
| RP11-192H23.8 | GPX1     | -0.236971976 | 5.51E-07    |
| RP11-192H23.8 | P3H3     | -0.245954521 | 1.97E-07    |
| RP11-192H23.8 | C2orf81  | -0.277037419 | 4.13E-09    |
| RP11-192H23.8 | CDT1     | -0.356973706 | 1.59E-14    |

|               |          |              |             |
|---------------|----------|--------------|-------------|
| RP11-192H23.8 | SNX25    | -0.271068913 | 9.02E-09    |
| RP11-192H23.8 | MTHFD1L  | -0.437447556 | 0           |
| RP11-192H23.8 | CDC42BPG | -0.499495007 | 4.41E-29    |
| RP11-192H23.8 | MSN      | -0.683129608 | 0           |
| RP11-192H23.8 | SIGLEC6  | -0.336482515 | 4.41E-13    |
| RP11-192H23.8 | F2R      | -0.164197755 | 0.000561091 |
| RP11-192H23.8 | TMEM184A | -0.312347631 | 2.78E-11    |
| RP11-192H23.8 | CKS2     | -0.090192672 | 0.059018483 |
| RP11-192H23.8 | TAX1BP3  | -0.269425304 | 1.11E-08    |
| RP11-192H23.8 | PMEPA1   | -0.391345524 | 0           |
| RP11-192H23.8 | CXCL16   | -0.430570015 | 0           |
| RP11-192H23.8 | FAXC     | -0.412227212 | 0           |
| RP11-192H23.8 | VTCN1    | -0.371018873 | 8.96E-16    |
| RP11-192H23.8 | SH2D4A   | -0.42224531  | 0           |
| RP11-192H23.8 | RNF24    | -0.469532108 | 0           |
| RP11-192H23.8 | LY6G6C   | -0.330414891 | 1.21E-12    |
| RP11-192H23.8 | NID1     | -0.292462775 | 5.05E-10    |
| RP11-192H23.8 | STAC     | -0.486966302 | 0           |
| RP11-192H23.8 | RAB34    | -0.326356034 | 3.14E-12    |
| RP11-192H23.8 | HES4     | -0.14397561  | 0.002517451 |
| RP11-192H23.8 | EPHA10   | -0.533791845 | 0           |
| RP11-192H23.8 | ENTPD2   | -0.440541733 | 0           |
| RP11-192H23.8 | DDB2     | -0.33373582  | 9.46E-13    |
| RP11-192H23.8 | NKAIN4   | -0.107029023 | 0.024966169 |
| RP11-192H23.8 | TRIM29   | -0.329943095 | 1.76E-12    |
| RP11-192H23.8 | ADCY8    | -0.509824982 | 2.03E-30    |
| RP11-192H23.8 | SFTA2    | -0.20274696  | 1.94E-05    |
| RP11-192H23.8 | NRIP1    | -0.49254036  | 0           |
| RP11-192H23.8 | VWA1     | -0.057915505 | 0.225790497 |
| RP11-192H23.8 | APLNR    | -0.238916988 | 4.43E-07    |
| RP11-192H23.8 | REN      | -0.362104496 | 4.78E-15    |
| RP11-192H23.8 | EDIL3    | -0.266301625 | 1.66E-08    |
| RP11-192H23.8 | AGRN     | -0.419788124 | 0           |
| RP11-192H23.8 | TREM1    | -0.354078385 | 2.73E-14    |
| RP11-192H23.8 | SRL      | -0.307294258 | 5.93E-11    |
| RP11-192H23.8 | RASGRF1  | -0.394601111 | 0           |
| RP11-192H23.8 | RMI2     | -0.346051963 | 1.16E-13    |
| RP11-192H23.8 | SAMD1    | -0.199215499 | 2.72E-05    |
| RP11-192H23.8 | MGAT4B   | -0.545533974 | 0           |
| RP11-192H23.8 | NXN      | -0.314641989 | 1.96E-11    |
| RP11-192H23.8 | SH3BGR13 | -0.269731531 | 1.07E-08    |
| RP11-192H23.8 | CA11     | -0.267012513 | 1.52E-08    |
| RP11-192H23.8 | PLD3     | -0.243960149 | 2.49E-07    |
| RP11-192H23.8 | LURAP1L  | -0.461729222 | 0           |
| RP11-192H23.8 | CARNS1   | -0.243249971 | 2.70E-07    |
| RP11-192H23.8 | PDLIM7   | -0.275132405 | 5.31E-09    |
| RP11-192H23.8 | BCL2L1   | -0.372757342 | 5.62E-16    |
| RP11-192H23.8 | GGT6     | -0.348982602 | 6.91E-14    |
| RP11-192H23.8 | DPYSL3   | -0.185031077 | 9.90E-05    |
| RP11-192H23.8 | FYN      | -0.404705305 | 0           |
| RP11-192H23.8 | TK1      | -0.225924991 | 1.85E-06    |

|               |          |              |             |
|---------------|----------|--------------|-------------|
| RP11-192H23.8 | AK1      | -0.217091658 | 4.67E-06    |
| RP11-192H23.8 | HIGD1B   | -0.115321956 | 0.01567086  |
| RP11-192H23.8 | TMEM59L  | -0.207676793 | 1.20E-05    |
| RP11-192H23.8 | MEGF9    | -0.546850932 | 0           |
| RP11-192H23.8 | ZFP36L1  | -0.408383567 | 0           |
| RP11-192H23.8 | ADRA1B   | -0.361607525 | 6.45E-15    |
| RP11-192H23.8 | EPHA4    | -0.406290051 | 0           |
| RP11-192H23.8 | TCERG1L  | -0.080616538 | 0.091590738 |
| RP11-192H23.8 | NGFR     | -0.327817098 | 2.48E-12    |
| RP11-192H23.8 | EBI3     | -0.342834388 | 2.03E-13    |
| RP11-192H23.8 | S100A10  | -0.229943946 | 1.20E-06    |
| RP11-192H23.8 | S100B    | -0.27464179  | 5.66E-09    |
| RP11-192H23.8 | CD44     | -0.321680515 | 6.59E-12    |
| RP11-192H23.8 | BHLHE41  | -0.480413285 | 0           |
| RP11-192H23.8 | FBXO2    | -0.289354414 | 7.79E-10    |
| RP11-192H23.8 | SLC30A2  | -0.247772873 | 1.59E-07    |
| RP11-192H23.8 | FRMD5    | -0.492859919 | 0           |
| RP11-192H23.8 | SAMD11   | -0.309456849 | 4.30E-11    |
| RP11-192H23.8 | SIPA1L2  | -0.419274531 | 0           |
| RP11-192H23.8 | S100A16  | -0.332060156 | 1.25E-12    |
| RP11-192H23.8 | PPL      | -0.49834703  | 0           |
| RP11-192H23.8 | ARHGD1B  | -0.110075684 | 0.021108592 |
| RP11-192H23.8 | CDC42EP3 | -0.403574863 | 0           |
| RP11-192H23.8 | RUNX2    | -0.412858387 | 0           |
| RP11-192H23.8 | LAMC2    | -0.480069188 | 0           |
| RP11-192H23.8 | BRINP1   | -0.548007472 | 0           |
| RP11-192H23.8 | GPRC5B   | -0.581792509 | 0           |
| RP11-192H23.8 | AQP5     | 0.013687283  | 0.77480964  |
| RP11-192H23.8 | PLAG1    | -0.377619519 | 1.43E-16    |
| RP11-192H23.8 | PTPRU    | -0.368088773 | 1.67E-15    |
| RP11-192H23.8 | ANGPTL4  | -0.31182482  | 3.01E-11    |
| RP11-192H23.8 | PALM3    | -0.264667661 | 2.04E-08    |
| RP11-192H23.8 | ACP5     | -0.241544238 | 3.28E-07    |
| RP11-192H23.8 | DLG4     | -0.318372022 | 1.10E-11    |
| RP11-192H23.8 | ETNK2    | -0.369610118 | 1.19E-15    |
| RP11-192H23.8 | CD109    | -0.424796535 | 0           |
| RP11-192H23.8 | SNX22    | -0.274085931 | 6.09E-09    |
| RP11-192H23.8 | TMEM98   | -0.405042736 | 0           |
| RP11-192H23.8 | CTHRC1   | -0.239824037 | 3.99E-07    |
| RP11-192H23.8 | S100A2   | -0.254613253 | 7.05E-08    |
| RP11-192H23.8 | C11orf80 | -0.378815064 | 9.43E-17    |
| RP11-192H23.8 | SREBF1   | -0.249653776 | 1.28E-07    |
| RP11-192H23.8 | PRSS22   | -0.354244051 | 2.65E-14    |
| RP11-192H23.8 | CMTM3    | -0.289029323 | 8.15E-10    |
| RP11-192H23.8 | RDH5     | -0.453643087 | 0           |
| RP11-192H23.8 | MYH10    | -0.497636001 | 0           |
| RP11-192H23.8 | EVPL     | -0.363710686 | 4.22E-15    |
| RP11-192H23.8 | SCD      | -0.458722984 | 0           |
| RP11-192H23.8 | CD151    | -0.338169223 | 4.51E-13    |
| RP11-192H23.8 | S100A4   | -0.28437976  | 1.54E-09    |
| RP11-192H23.8 | BNIPL    | -0.292553834 | 4.99E-10    |

|               |          |              |             |
|---------------|----------|--------------|-------------|
| RP11-192H23.8 | MAP3K6   | -0.415714845 | 0           |
| RP11-192H23.8 | MANEAL   | -0.466609979 | 0           |
| RP11-192H23.8 | CD207    | -0.312305869 | 2.19E-11    |
| RP11-192H23.8 | CD1A     | -0.324426007 | 3.23E-12    |
| RP11-192H23.8 | C3       | -0.301577796 | 1.37E-10    |
| RP11-192H23.8 | NT5E     | -0.334258773 | 8.67E-13    |
| RP11-192H23.8 | CACNG4   | -0.364218296 | 3.23E-15    |
| RP11-192H23.8 | FHOD1    | -0.239598516 | 4.10E-07    |
| RP11-192H23.8 | LEMD1    | -0.469922302 | 0           |
| RP11-192H23.8 | ATP11A   | -0.239810137 | 4.00E-07    |
| RP11-192H23.8 | PPAP2C   | -0.219363605 | 3.69E-06    |
| RP11-192H23.8 | DRAM1    | -0.37136436  | 7.89E-16    |
| RP11-192H23.8 | CDA      | -0.200428915 | 2.42E-05    |
| RP11-192H23.8 | CCND2    | -0.327827452 | 2.48E-12    |
| RP11-192H23.8 | LCN6     | -0.216684451 | 4.61E-06    |
| RP11-192H23.8 | CDH4     | -0.378963851 | 8.92E-17    |
| RP11-192H23.8 | MMP11    | -0.319457927 | 9.33E-12    |
| RP11-192H23.8 | B3GAT1   | -0.319592956 | 9.13E-12    |
| RP11-192H23.8 | SPP1     | -0.285172346 | 1.39E-09    |
| RP11-192H23.8 | HLA-DQB1 | -0.326103422 | 3.27E-12    |
| RP11-192H23.8 | SDC3     | -0.407125472 | 0           |
| RP11-192H23.8 | CX3CL1   | -0.33531858  | 7.27E-13    |
| RP11-192H23.8 | SDK1     | -0.308509235 | 4.95E-11    |
| RP11-192H23.8 | DOCK9    | -0.579720127 | 0           |
| RP11-192H23.8 | CSF2     | -0.356959054 | 1.23E-14    |
| RP11-192H23.8 | GRHL3    | -0.443415069 | 0           |
| RP11-192H23.8 | TMEM92   | -0.472823078 | 7.79E-26    |
| RP11-192H23.8 | BASP1    | -0.374530874 | 3.55E-16    |
| RP11-192H23.8 | HRH1     | -0.439073718 | 0           |
| RP11-192H23.8 | ESM1     | 0.009404369  | 0.844168372 |
| RP11-192H23.8 | B4GALNT3 | -0.455096208 | 0           |
| RP11-192H23.8 | LMO3     | -0.167504546 | 0.000431572 |
| RP11-192H23.8 | C9orf16  | -0.311527955 | 3.15E-11    |
| RP11-192H23.8 | SEMA3F   | -0.295467311 | 3.30E-10    |
| RP11-192H23.8 | PLA2G12B | -0.327984176 | 1.81E-12    |
| RP11-192H23.8 | KLK6     | -0.349660749 | 4.53E-14    |
| RP11-192H23.8 | ST3GAL5  | -0.346910504 | 9.99E-14    |
| RP11-192H23.8 | FAM132B  | -0.182684949 | 0.000121548 |
| RP11-192H23.8 | CDKN1A   | -0.22133656  | 3.01E-06    |
| RP11-192H23.8 | E2F1     | -0.38322549  | 2.50E-18    |
| RP11-192H23.8 | B3GNT8   | -0.276667225 | 4.34E-09    |
| RP11-192H23.8 | MTMR11   | -0.37749144  | 1.49E-16    |
| RP11-192H23.8 | MYO1G    | -0.219990242 | 3.46E-06    |
| RP11-192H23.8 | TMSB10   | -0.214469231 | 6.10E-06    |
| RP11-192H23.8 | UNC5CL   | -0.447903931 | 0           |
| RP11-192H23.8 | ABR      | -0.463141778 | 0           |
| RP11-192H23.8 | PLP2     | -0.351799913 | 4.15E-14    |
| RP11-192H23.8 | SRCIN1   | -0.44750934  | 0           |
| RP11-192H23.8 | PDE9A    | -0.366848691 | 2.18E-15    |
| RP11-192H23.8 | TREM2    | -0.255410094 | 6.41E-08    |
| RP11-192H23.8 | KDEL3    | -0.312627618 | 2.66E-11    |

|               |          |              |             |
|---------------|----------|--------------|-------------|
| RP11-192H23.8 | PC       | -0.55633856  | 0           |
| RP11-192H23.8 | C2CD4A   | -0.511614759 | 0           |
| RP11-192H23.8 | PELI1    | -0.338625513 | 4.18E-13    |
| RP11-192H23.8 | SSX1     | -0.209305225 | 1.02E-05    |
| RP11-192H23.8 | MROH6    | -0.382208376 | 1.50E-17    |
| RP11-192H23.8 | ESPN     | -0.378917896 | 9.07E-17    |
| RP11-192H23.8 | BMP1     | -0.316032844 | 1.58E-11    |
| RP11-192H23.8 | TM4SF4   | -0.365731416 | 2.43E-15    |
| RP11-192H23.8 | CORO2A   | -0.594591325 | 0           |
| RP11-192H23.8 | CD164L2  | -0.397325533 | 4.71E-18    |
| RP11-192H23.8 | CTSS     | -0.337459612 | 5.08E-13    |
| RP11-192H23.8 | CLU      | -0.392088467 | 0           |
| RP11-192H23.8 | TMSB4X   | -0.294556433 | 3.76E-10    |
| RP11-192H23.8 | WNT10A   | -0.325246879 | 2.83E-12    |
| RP11-192H23.8 | NAPSA    | -0.195316822 | 3.91E-05    |
| RP11-192H23.8 | PLEKHA4  | -0.445645316 | 0           |
| RP11-192H23.8 | SFTPA1   | 0.007625576  | 0.873416496 |
| RP11-192H23.8 | Clorf116 | -0.369500336 | 1.22E-15    |
| RP11-192H23.8 | TM4SF1   | -0.236622631 | 5.73E-07    |
| RP11-192H23.8 | SEL1L3   | -0.395697512 | 0           |
| RP11-192H23.8 | VASN     | -0.452685828 | 0           |
| RP11-192H23.8 | NPTXR    | -0.595179949 | 0           |
| RP11-192H23.8 | PDE4C    | -0.331749107 | 1.31E-12    |
| RP11-192H23.8 | CDC42EP1 | -0.401733108 | 0           |
| RP11-192H23.8 | ENDOD1   | -0.644974285 | 0           |
| RP11-192H23.8 | RYR1     | -0.353949171 | 2.80E-14    |
| RP11-192H23.8 | IL1RAP   | -0.520682123 | 0           |
| RP11-192H23.8 | SLC35F2  | -0.510883678 | 1.48E-30    |
| RP11-192H23.8 | ISYNA1   | -0.271963622 | 8.03E-09    |
| RP11-192H23.8 | HLA-G    | -0.33953086  | 3.58E-13    |
| RP11-192H23.8 | CDKN2B   | -0.432217312 | 0           |
| RP11-192H23.8 | ALDH1A3  | -0.346773631 | 1.02E-13    |
| RP11-192H23.8 | CLIP3    | -0.348378802 | 7.69E-14    |
| RP11-192H23.8 | ULBP2    | -0.420609077 | 0           |
| RP11-192H23.8 | ETHE1    | -0.470689782 | 0           |
| RP11-192H23.8 | XPR1     | -0.418041116 | 0           |
| RP11-192H23.8 | SPTBN2   | -0.625269136 | 0           |
| RP11-192H23.8 | IVL      | -0.420495211 | 3.08E-20    |
| RP11-192H23.8 | MARCO    | -0.302883265 | 1.14E-10    |
| RP11-192H23.8 | PLXND1   | -0.321716258 | 6.55E-12    |
| RP11-192H23.8 | EMILIN2  | -0.344183259 | 1.61E-13    |
| RP11-192H23.8 | PLAUR    | -0.313915783 | 2.19E-11    |
| RP11-192H23.8 | CDC42EP5 | -0.321854407 | 6.41E-12    |
| RP11-192H23.8 | TRPC5    | -0.413531926 | 1.46E-19    |
| RP11-192H23.8 | TMEM100  | -0.329920543 | 1.77E-12    |
| RP11-192H23.8 | QSOX1    | -0.453048505 | 0           |
| RP11-192H23.8 | ARHGAP23 | -0.448346463 | 0           |
| RP11-192H23.8 | MDFI     | -0.116822309 | 0.014361379 |
| RP11-192H23.8 | FSTL3    | -0.373764102 | 4.35E-16    |
| RP11-192H23.8 | INF2     | -0.485292624 | 0           |
| RP11-192H23.8 | TGFBR1   | -0.604064769 | 0           |

|               |           |              |             |
|---------------|-----------|--------------|-------------|
| RP11-192H23.8 | TGFBI     | -0.322713373 | 5.60E-12    |
| RP11-192H23.8 | ERBB3     | -0.447464519 | 0           |
| RP11-192H23.8 | CCL18     | -0.25110945  | 1.07E-07    |
| RP11-192H23.8 | CCL17     | -0.255089622 | 5.98E-08    |
| RP11-192H23.8 | C16orf45  | -0.366842876 | 2.19E-15    |
| RP11-192H23.8 | PRDM1     | -0.354670413 | 2.45E-14    |
| RP11-192H23.8 | TRIM47    | -0.386722626 | 0           |
| RP11-192H23.8 | CNFN      | -0.253025528 | 8.54E-08    |
| RP11-192H23.8 | ARMCX3    | -0.459737545 | 0           |
| RP11-192H23.8 | RAMP1     | -0.312331178 | 2.79E-11    |
| RP11-192H23.8 | GABRD     | -0.081084175 | 0.089720039 |
| RP11-192H23.8 | COL13A1   | -0.167040597 | 0.00044789  |
| RP11-192H23.8 | S100A5    | -0.330902623 | 1.51E-12    |
| RP11-192H23.8 | MISP      | -0.238889046 | 4.44E-07    |
| RP11-192H23.8 | HES6      | -0.232856997 | 8.71E-07    |
| RP11-192H23.8 | PSD3      | -0.632518715 | 0           |
| RP11-192H23.8 | DOK7      | -0.382632043 | 9.31E-18    |
| RP11-192H23.8 | ZMAT3     | -0.502479171 | 0           |
| RP11-192H23.8 | MFAP2     | -0.238298153 | 4.75E-07    |
| RP11-192H23.8 | TMEM79    | -0.412635135 | 0           |
| RP11-192H23.8 | SLC1A5    | -0.327772419 | 2.50E-12    |
| RP11-192H23.8 | BBC3      | -0.287026441 | 1.07E-09    |
| RP11-192H23.8 | HLA-DQB2  | -0.28474953  | 1.47E-09    |
| RP11-192H23.8 | C1QL1     | -0.404905154 | 0           |
| RP11-192H23.8 | TMEM215   | -0.306892565 | 5.00E-11    |
| RP11-192H23.8 | PNP       | -0.345165623 | 1.36E-13    |
| RP11-192H23.8 | ARNTL     | -0.428676773 | 0           |
| RP11-192H23.8 | CLDN2     | -0.401427038 | 1.99E-18    |
| RP11-192H23.8 | MVP       | -0.43966759  | 0           |
| RP11-192H23.8 | LGALS1    | -0.276952743 | 4.18E-09    |
| RP11-192H23.8 | BIRC7     | -0.364174326 | 3.25E-15    |
| RP11-192H23.8 | COL8A1    | -0.567881691 | 0           |
| RP11-192H23.8 | PERP      | -0.454323196 | 0           |
| RP11-192H23.8 | GJA4      | -0.190135795 | 6.28E-05    |
| RP11-192H23.8 | IGFL2     | -0.344481014 | 1.12E-13    |
| RP11-192H23.8 | DAPK2     | -0.347502106 | 8.99E-14    |
| RP11-192H23.8 | MAMLD1    | -0.459893707 | 0           |
| RP11-192H23.8 | ETV5      | -0.432647787 | 0           |
| RP11-192H23.8 | RUNX1     | -0.487885832 | 0           |
| RP11-192H23.8 | LONRF2    | -0.389484621 | 0           |
| RP11-192H23.8 | SPOCK1    | -0.238527787 | 4.63E-07    |
| RP11-192H23.8 | XKRX      | -0.350568341 | 5.19E-14    |
| RP11-192H23.8 | TGFB1     | -0.234753785 | 7.06E-07    |
| RP11-192H23.8 | ERP27     | -0.199079903 | 2.75E-05    |
| RP11-192H23.8 | TNFRSF10C | -0.406239132 | 0           |
| RP11-192H23.8 | PALM      | -0.424494989 | 0           |
| RP11-192H23.8 | TSC22D1   | -0.397741244 | 0           |
| RP11-192H23.8 | TGM2      | -0.434146013 | 0           |
| RP11-192H23.8 | UBE2QL1   | -0.33081823  | 1.53E-12    |
| RP11-192H23.8 | ECE1      | -0.481001625 | 0           |
| RP11-192H23.8 | COL8A2    | -0.401381635 | 0           |

|               |          |              |            |
|---------------|----------|--------------|------------|
| RP11-192H23.8 | HIST3H2A | -0.299911352 | 1.75E-10   |
| RP11-192H23.8 | TNFRSF21 | -0.457731258 | 0          |
| RP11-192H23.8 | SOX4     | -0.392499227 | 0          |
| RP11-192H23.8 | ELF3     | -0.407805155 | 0          |
| RP11-192H23.8 | TPD52L1  | -0.542276117 | 0          |
| RP11-192H23.8 | INHBB    | -0.372098225 | 6.61E-16   |
| RP11-192H23.8 | HPN      | -0.284725701 | 1.47E-09   |
| RP11-192H23.8 | MMP7     | -0.354430845 | 1.93E-14   |
| RP11-192H23.8 | RAB27A   | -0.59934996  | 0          |
| RP11-192H23.8 | IGF2BP2  | -0.435013772 | 0          |
| RP11-192H23.8 | ITGB4    | -0.306936545 | 6.25E-11   |
| RP11-192H23.8 | PPP1R1B  | -0.394286517 | 0          |
| RP11-192H23.8 | NPDC1    | -0.230645472 | 1.11E-06   |
| RP11-192H23.8 | CCL13    | -0.387035585 | 3.88E-17   |
| RP11-192H23.8 | SPINT1   | -0.517593903 | 0          |
| RP11-192H23.8 | HEY2     | -0.334456069 | 8.39E-13   |
| RP11-192H23.8 | CST2     | -0.296205685 | 2.43E-10   |
| RP11-192H23.8 | ADM      | -0.408337187 | 0          |
| RP11-192H23.8 | VSTM2L   | -0.29538306  | 3.34E-10   |
| RP11-192H23.8 | FAM84A   | -0.377673133 | 1.41E-16   |
| RP11-192H23.8 | P4HA2    | -0.4991121   | 0          |
| RP11-192H23.8 | LPL      | -0.265993839 | 1.73E-08   |
| RP11-192H23.8 | TMEM173  | -0.283249318 | 1.80E-09   |
| RP11-192H23.8 | DHRS3    | -0.338850041 | 4.02E-13   |
| RP11-192H23.8 | SCN1B    | -0.441241983 | 0          |
| RP11-192H23.8 | GLT1D1   | -0.390103598 | 0          |
| RP11-192H23.8 | PHYHIP   | -0.473878139 | 0          |
| RP11-192H23.8 | BHLHE40  | -0.460340778 | 0          |
| RP11-192H23.8 | BID      | -0.398185761 | 0          |
| RP11-192H23.8 | POSTN    | -0.27995586  | 2.80E-09   |
| RP11-192H23.8 | ITGA3    | -0.568524497 | 0          |
| RP11-192H23.8 | RSP04    | -0.43713523  | 0          |
| RP11-192H23.8 | ADAMTS9  | -0.331894207 | 1.28E-12   |
| RP11-192H23.8 | ABTB2    | -0.587116508 | 0          |
| RP11-192H23.8 | KCNQ3    | -0.572136805 | 0          |
| RP11-192H23.8 | ANXA1    | -0.432431769 | 0          |
| RP11-192H23.8 | S100A11  | -0.337272954 | 5.25E-13   |
| RP11-192H23.8 | CEACAM6  | -0.357875186 | 1.04E-14   |
| RP11-192H23.8 | IER5L    | -0.457531835 | 0          |
| RP11-192H23.8 | KRT80    | -0.460889262 | 0          |
| RP11-192H23.8 | CDH6     | -0.377748733 | 1.37E-16   |
| RP11-192H23.8 | UNC5B    | -0.483661214 | 0          |
| RP11-192H23.8 | PLEKHN1  | -0.414479302 | 0          |
| RP11-192H23.8 | SYTL1    | -0.185920679 | 9.15E-05   |
| RP11-192H23.8 | TMEM163  | -0.2794617   | 2.99E-09   |
| RP11-192H23.8 | C4orf48  | -0.159451459 | 0.00081093 |
| RP11-192H23.8 | B3GNT7   | -0.345320509 | 1.32E-13   |
| RP11-192H23.8 | BAIAP3   | -0.398288026 | 0          |
| RP11-192H23.8 | PHLDA2   | -0.386604192 | 0          |
| RP11-192H23.8 | GAP43    | -0.402084654 | 1.73E-18   |
| RP11-192H23.8 | S100A1   | -0.374890147 | 3.22E-16   |

|               |            |              |             |
|---------------|------------|--------------|-------------|
| RP11-192H23.8 | PTPRE      | -0.538309358 | 0           |
| RP11-192H23.8 | CCND1      | -0.490885546 | 0           |
| RP11-192H23.8 | ST6GALNAC5 | -0.440100506 | 3.20E-22    |
| RP11-192H23.8 | KRT17      | -0.169597353 | 0.000364615 |
| RP11-192H23.8 | HPCAL4     | -0.359403802 | 9.95E-15    |
| RP11-192H23.8 | GABBR2     | -0.334169132 | 8.80E-13    |
| RP11-192H23.8 | DIRAS3     | -0.379999688 | 5.83E-17    |
| RP11-192H23.8 | SERINC2    | -0.380304921 | 5.07E-17    |
| RP11-192H23.8 | PTCHD4     | -0.315670734 | 1.67E-11    |
| RP11-192H23.8 | EPS8       | -0.575950522 | 0           |
| RP11-192H23.8 | LY6E       | -0.431829529 | 0           |
| RP11-192H23.8 | UPP1       | -0.361126556 | 7.09E-15    |
| RP11-192H23.8 | AHNAK2     | -0.491189219 | 0           |
| RP11-192H23.8 | PLXNC1     | -0.510018808 | 0           |
| RP11-192H23.8 | TNC        | -0.473130941 | 0           |
| RP11-192H23.8 | DUSP4      | -0.485944508 | 0           |
| RP11-192H23.8 | NRCAM      | -0.580699654 | 0           |
| RP11-192H23.8 | NRP2       | -0.42066567  | 0           |
| RP11-192H23.8 | CTSC       | -0.403944207 | 0           |
| RP11-192H23.8 | AMIGO2     | -0.348489576 | 7.54E-14    |
| RP11-192H23.8 | NAB2       | -0.385058167 | 0           |
| RP11-192H23.8 | TBC1D2     | -0.528113538 | 0           |
| RP11-192H23.8 | PHLDA3     | -0.297208078 | 2.58E-10    |
| RP11-192H23.8 | PTP4A3     | -0.309775699 | 4.10E-11    |
| RP11-192H23.8 | CRABP2     | -0.182774731 | 0.000120604 |
| RP11-192H23.8 | GOS2       | -0.341376728 | 2.61E-13    |
| RP11-192H23.8 | S100A6     | -0.343528539 | 1.80E-13    |
| RP11-192H23.8 | FOXQ1      | -0.351479361 | 4.40E-14    |
| RP11-192H23.8 | LRG1       | -0.42426039  | 0           |
| RP11-192H23.8 | LAMP5      | -0.274485911 | 5.78E-09    |
| RP11-192H23.8 | ALDH3B1    | -0.399624273 | 0           |
| RP11-192H23.8 | CDH2       | -0.216193687 | 5.12E-06    |
| RP11-192H23.8 | SCG5       | -0.250984208 | 1.09E-07    |
| RP11-192H23.8 | ZCCHC16    | -0.390152223 | 2.06E-17    |
| RP11-192H23.8 | GRB7       | -0.488262552 | 0           |
| RP11-192H23.8 | TIAM1      | -0.357867848 | 1.34E-14    |
| RP11-192H23.8 | FXYS5      | -0.201011724 | 2.29E-05    |
| RP11-192H23.8 | CLDN9      | -0.405000043 | 0           |
| RP11-192H23.8 | FAM43A     | -0.562929589 | 0           |
| RP11-192H23.8 | CHST2      | -0.358745536 | 1.13E-14    |
| RP11-192H23.8 | HMGA2      | -0.412915122 | 0           |
| RP11-192H23.8 | GALNT7     | -0.561503842 | 0           |
| RP11-192H23.8 | CBLN1      | -0.218603074 | 3.99E-06    |
| RP11-192H23.8 | STRA6      | -0.365309616 | 3.03E-15    |
| RP11-192H23.8 | MUC21      | -0.420359829 | 3.18E-20    |
| RP11-192H23.8 | PRR36      | -0.376190226 | 2.23E-16    |
| RP11-192H23.8 | NFE2L3     | -0.29065194  | 6.51E-10    |
| RP11-192H23.8 | NR1D1      | -0.232905505 | 8.67E-07    |
| RP11-192H23.8 | MUC1       | -0.367424408 | 1.93E-15    |
| RP11-192H23.8 | NAT8L      | -0.325369415 | 3.68E-12    |
| RP11-192H23.8 | APOC1      | -0.159703787 | 0.000795404 |



|               |           |              |             |
|---------------|-----------|--------------|-------------|
| RP11-192H23.8 | EVA1A     | -0.436954246 | 0           |
| RP11-192H23.8 | ENTPD1    | -0.387623434 | 0           |
| RP11-192H23.8 | COL1A1    | -0.308348108 | 5.07E-11    |
| RP11-192H23.8 | FNDC4     | -0.248056831 | 1.54E-07    |
| RP11-192H23.8 | FRMD3     | -0.301134555 | 1.46E-10    |
| RP11-192H23.8 | SHROOM4   | -0.514790634 | 0           |
| RP11-192H23.8 | NELL2     | -0.363563176 | 4.35E-15    |
| RP11-192H23.8 | EPHB3     | -0.468216143 | 0           |
| RP11-192H23.8 | TMC6      | -0.461633056 | 0           |
| RP11-192H23.8 | NOD1      | -0.433085638 | 0           |
| RP11-192H23.8 | GGCT      | -0.485154617 | 0           |
| RP11-192H23.8 | ICAM1     | -0.480709299 | 0           |
| RP11-192H23.8 | PRSS23    | -0.364577879 | 3.53E-15    |
| RP11-192H23.8 | CFI       | -0.341745646 | 2.45E-13    |
| RP11-192H23.8 | CD55      | -0.418634562 | 0           |
| RP11-192H23.8 | RASD2     | -0.434281467 | 0           |
| RP11-192H23.8 | KLK11     | -0.275149495 | 4.57E-09    |
| RP11-192H23.8 | ICAM5     | -0.318097141 | 1.15E-11    |
| RP11-192H23.8 | ADORA1    | -0.506696273 | 0           |
| RP11-192H23.8 | ITGA2     | -0.475877901 | 0           |
| RP11-192H23.8 | ABCC3     | -0.416479914 | 0           |
| RP11-192H23.8 | MFGE8     | -0.495297815 | 0           |
| RP11-192H23.8 | STK32A    | -0.357105615 | 1.55E-14    |
| RP11-192H23.8 | CYSLTR2   | -0.322080779 | 6.19E-12    |
| RP11-192H23.8 | LAD1      | -0.563852523 | 0           |
| RP11-192H23.8 | MGAT3     | -0.422452676 | 0           |
| RP11-192H23.8 | IGFBP6    | -0.290598184 | 6.55E-10    |
| RP11-192H23.8 | CYP2S1    | -0.378351399 | 1.12E-16    |
| RP11-192H23.8 | KCNJ2     | -0.353061413 | 3.30E-14    |
| RP11-192H23.8 | FAM20A    | -0.286830564 | 1.10E-09    |
| RP11-192H23.8 | TGFA      | -0.511089394 | 0           |
| RP11-192H23.8 | MXRA8     | -0.322944    | 5.40E-12    |
| RP11-192H23.8 | C8orf4    | -0.317322569 | 1.30E-11    |
| RP11-192H23.8 | CLDN10    | -0.408491107 | 4.38E-19    |
| RP11-192H23.8 | PDE5A     | -0.594516718 | 0           |
| RP11-192H23.8 | APOE      | -0.233646179 | 7.99E-07    |
| RP11-192H23.8 | SPOCK2    | -0.399066995 | 0           |
| RP11-192H23.8 | TENM1     | -0.218689028 | 3.96E-06    |
| RP11-192H23.8 | SLIT1     | -0.236131307 | 6.06E-07    |
| RP11-192H23.8 | CXCL14    | -0.09519243  | 0.046253587 |
| RP11-192H23.8 | ECM1      | -0.158632775 | 0.000863256 |
| RP11-192H23.8 | DUSP5     | -0.482299293 | 0           |
| RP11-192H23.8 | SEZ6L2    | -0.36014178  | 8.61E-15    |
| RP11-192H23.8 | THRSP     | -0.329001438 | 2.05E-12    |
| RP11-192H23.8 | C19orf33  | -0.268682361 | 1.23E-08    |
| RP11-192H23.8 | MPZL2     | -0.49057166  | 0           |
| RP11-192H23.8 | CTSH      | -0.495821762 | 0           |
| RP11-192H23.8 | CYP1B1    | -0.610096109 | 0           |
| RP11-192H23.8 | ALOX5     | -0.365886468 | 2.68E-15    |
| RP11-192H23.8 | SYTL5     | -0.460128535 | 2.19E-24    |
| RP11-192H23.8 | TNFRSF12A | -0.381551244 | 2.52E-17    |

|               |          |              |             |
|---------------|----------|--------------|-------------|
| RP11-192H23.8 | DUSP6    | -0.370413058 | 9.87E-16    |
| RP11-192H23.8 | ALOX15B  | -0.368057853 | 1.68E-15    |
| RP11-192H23.8 | SDC4     | -0.484999731 | 0           |
| RP11-192H23.8 | MDK      | -0.313403893 | 2.37E-11    |
| RP11-192H23.8 | KRT19    | -0.380566469 | 4.46E-17    |
| RP11-192H23.8 | MET      | -0.578169989 | 0           |
| RP11-192H23.8 | TESC     | -0.275045459 | 5.37E-09    |
| RP11-192H23.8 | CXCL17   | -0.516407525 | 2.71E-31    |
| RP11-192H23.8 | NPC2     | -0.395283064 | 0           |
| RP11-192H23.8 | COMP     | -0.29490365  | 3.58E-10    |
| RP11-192H23.8 | TUSC3    | -0.386625184 | 0           |
| RP11-192H23.8 | TMPRSS4  | -0.434557199 | 0           |
| RP11-192H23.8 | LGALS3   | -0.40404094  | 0           |
| RP11-192H23.8 | CRLF1    | -0.283059257 | 1.85E-09    |
| RP11-192H23.8 | CTXN1    | -0.35735922  | 1.47E-14    |
| RP11-192H23.8 | PCSK1N   | -0.137731372 | 0.00386197  |
| RP11-192H23.8 | NMU      | -0.285425282 | 1.13E-09    |
| RP11-192H23.8 | GALE     | -0.398868423 | 0           |
| RP11-192H23.8 | PCSK2    | -0.16660771  | 0.000463631 |
| RP11-192H23.8 | GJB3     | -0.477380807 | 0           |
| RP11-192H23.8 | SLPI     | -0.349349819 | 6.47E-14    |
| RP11-192H23.8 | AGR2     | -0.230073585 | 1.18E-06    |
| RP11-192H23.8 | MRC2     | -0.370163141 | 1.05E-15    |
| RP11-192H23.8 | GOLT1A   | -0.337854486 | 4.76E-13    |
| RP11-192H23.8 | SLC27A6  | -0.401146484 | 2.11E-18    |
| RP11-192H23.8 | KCNN4    | -0.369715361 | 1.16E-15    |
| RP11-192H23.8 | ETV4     | -0.255110401 | 5.96E-08    |
| RP11-192H23.8 | SYT12    | -0.547132904 | 0           |
| RP11-192H23.8 | PVRL4    | -0.514599154 | 0           |
| RP11-192H23.8 | PLCD3    | -0.518953838 | 0           |
| RP11-192H23.8 | PLAU     | -0.431965551 | 0           |
| RP11-192H23.8 | LRRK2    | -0.358164429 | 1.26E-14    |
| RP11-192H23.8 | SFN      | -0.368600663 | 1.49E-15    |
| RP11-192H23.8 | LPAR5    | -0.509042401 | 0           |
| RP11-192H23.8 | NGEF     | -0.405860994 | 0           |
| RP11-192H23.8 | DTX4     | -0.481044318 | 0           |
| RP11-192H23.8 | CST6     | -0.336278818 | 6.20E-13    |
| RP11-192H23.8 | QPCT     | -0.469961732 | 0           |
| RP11-192H23.8 | TIMP1    | -0.385246527 | 0           |
| RP11-192H23.8 | CAMK2N1  | -0.508361583 | 0           |
| RP11-192H23.8 | KLHDC8A  | -0.192208603 | 5.21E-05    |
| RP11-192H23.8 | PDLIM4   | -0.504527299 | 0           |
| RP11-192H23.8 | SCEL     | -0.460202487 | 0           |
| RP11-192H23.8 | LCN2     | -0.486275697 | 0           |
| RP11-192H23.8 | PROS1    | -0.625731383 | 0           |
| RP11-192H23.8 | GABRB2   | -0.551399507 | 0           |
| RP11-192H23.8 | TMPRSS6  | -0.458898862 | 0           |
| RP11-192H23.8 | KLK7     | -0.420768486 | 2.90E-20    |
| RP11-192H23.8 | PDZK1IP1 | -0.414552206 | 0           |
| RP11-192H23.8 | CDH3     | -0.422610824 | 0           |
| RP11-192H23.8 | LRP4     | -0.366525444 | 2.34E-15    |

|               |           |              |             |
|---------------|-----------|--------------|-------------|
| RP11-192H23.8 | IGSF1     | -0.173607798 | 0.000262523 |
| RP11-192H23.8 | B3GNT3    | -0.462385644 | 0           |
| RP11-192H23.8 | CLDN1     | -0.552968226 | 0           |
| RP11-192H23.8 | GDF15     | -0.509858532 | 0           |
| RP11-192H23.8 | ARHGAP36  | -0.145315312 | 0.002271482 |
| RP11-192H23.8 | LAMB3     | -0.436664047 | 0           |
| RP11-192H23.8 | KLK10     | -0.374886601 | 3.22E-16    |
| RP11-192H23.8 | DPP4      | -0.485211493 | 0           |
| RP11-192H23.8 | METTL7B   | -0.490661443 | 0           |
| RP11-192H23.8 | LIPH      | -0.491497715 | 0           |
| RP11-192H23.8 | CLDN16    | -0.541811317 | 0           |
| RP11-192H23.8 | CHI3L1    | -0.513655228 | 0           |
| RP11-192H23.8 | SLC22A31  | -0.294708303 | 3.02E-10    |
| RP11-192H23.8 | TACSTD2   | -0.518998375 | 0           |
| RP11-192H23.8 | SFTPB     | -0.374573141 | 3.51E-16    |
| RP11-192H23.8 | RXRG      | -0.367560004 | 1.87E-15    |
| RP11-192H23.8 | DCSTAMP   | -0.558459363 | 2.30E-37    |
| RP11-192H23.8 | CITED1    | -0.427921348 | 0           |
| RP11-192H23.8 | SERPINA1  | -0.522783015 | 0           |
| RP11-192H23.8 | PRR15     | -0.342610569 | 2.12E-13    |
| RP11-192H23.8 | SLC34A2   | -0.606447632 | 0           |
| RP11-192H23.8 | FN1       | -0.593571799 | 0           |
| RP11-192H23.8 | ZCCHC12   | -0.246658743 | 1.82E-07    |
| LINC00982     | TFF3      | 0.746888803  | 0           |
| LINC00982     | CCL21     | 0.417945808  | 5.47E-20    |
| LINC00982     | TPO       | 0.654699773  | 0           |
| LINC00982     | MT1G      | 0.562558401  | 0           |
| LINC00982     | DIO1      | 0.632093771  | 0           |
| LINC00982     | DPT       | 0.346229524  | 8.28E-14    |
| LINC00982     | CDH16     | 0.647695998  | 0           |
| LINC00982     | CRABP1    | 0.516650911  | 2.51E-31    |
| LINC00982     | SLC26A7   | 0.61481191   | 0           |
| LINC00982     | MT1H      | 0.509948245  | 1.96E-30    |
| LINC00982     | SLC26A4   | 0.612086651  | 0           |
| LINC00982     | SLC5A8    | 0.525417502  | 1.60E-32    |
| LINC00982     | PKHD1L1   | 0.639518888  | 7.39E-52    |
| LINC00982     | TFCP2L1   | 0.545126476  | 0           |
| LINC00982     | WSCD2     | 0.657313713  | 1.19E-55    |
| LINC00982     | IPCEF1    | 0.606367352  | 0           |
| LINC00982     | SLC5A5    | 0.538932898  | 1.94E-34    |
| LINC00982     | MT1F      | 0.644854433  | 0           |
| LINC00982     | FOSB      | 0.454689987  | 0           |
| LINC00982     | SEMA3D    | 0.60415046   | 5.07E-45    |
| LINC00982     | BMP8A     | 0.601985294  | 0           |
| LINC00982     | MATN2     | 0.596298476  | 0           |
| LINC00982     | PLA2R1    | 0.566740895  | 0           |
| LINC00982     | COL23A1   | 0.647188646  | 0           |
| LINC00982     | HGD       | 0.618626619  | 0           |
| LINC00982     | TCEAL2    | 0.550947472  | 0           |
| LINC00982     | CHRD1     | 0.325057881  | 2.91E-12    |
| LINC00982     | TNFRSF11B | 0.479801825  | 0           |

|           |            |             |             |
|-----------|------------|-------------|-------------|
| LINC00982 | FAM167A    | 0.632389502 | 0           |
| LINC00982 | KIT        | 0.590411243 | 0           |
| LINC00982 | SLC4A4     | 0.597170207 | 0           |
| LINC00982 | SMOC2      | 0.488688063 | 0           |
| LINC00982 | FHL1       | 0.688072916 | 0           |
| LINC00982 | OTOS       | 0.601306745 | 0           |
| LINC00982 | IGFBPL1    | 0.549065088 | 6.22E-36    |
| LINC00982 | HBB        | 0.363002777 | 4.87E-15    |
| LINC00982 | BEX1       | 0.664003438 | 0           |
| LINC00982 | FABP4      | 0.530392085 | 3.22E-33    |
| LINC00982 | LMOD1      | 0.61316433  | 0           |
| LINC00982 | SOD3       | 0.602869507 | 0           |
| LINC00982 | TMEM171    | 0.509332883 | 0           |
| LINC00982 | PI16       | 0.406548195 | 0           |
| LINC00982 | ZMAT4      | 0.662170075 | 9.94E-57    |
| LINC00982 | MFAP4      | 0.328388276 | 2.26E-12    |
| LINC00982 | CWH43      | 0.535470791 | 6.12E-34    |
| LINC00982 | SPX        | 0.671531302 | 0           |
| LINC00982 | APOD       | 0.242648865 | 2.89E-07    |
| LINC00982 | DPP6       | 0.651240366 | 0           |
| LINC00982 | MMRN1      | 0.388747635 | 0           |
| LINC00982 | WDR72      | 0.516377083 | 0           |
| LINC00982 | MPPED2     | 0.715418689 | 0           |
| LINC00982 | PAPSS2     | 0.391915142 | 0           |
| LINC00982 | DCN        | 0.134432807 | 0.004809286 |
| LINC00982 | SORBS2     | 0.622351404 | 0           |
| LINC00982 | EGR2       | 0.463102914 | 0           |
| LINC00982 | EDN3       | 0.635886827 | 4.09E-51    |
| LINC00982 | DIO2       | 0.566188014 | 0           |
| LINC00982 | ITPR1      | 0.640020765 | 0           |
| LINC00982 | CFD        | 0.435513181 | 0           |
| LINC00982 | CPXM1      | 0.481957466 | 0           |
| LINC00982 | ELMO1      | 0.675366153 | 0           |
| LINC00982 | GPC3       | 0.510199597 | 1.82E-30    |
| LINC00982 | MYOC       | 0.393959425 | 9.46E-18    |
| LINC00982 | DEPTOR     | 0.631019071 | 0           |
| LINC00982 | DGKI       | 0.592877365 | 0           |
| LINC00982 | CARTPT     | 0.57681983  | 2.69E-40    |
| LINC00982 | IYD        | 0.369445445 | 1.23E-15    |
| LINC00982 | LYVE1      | 0.409880942 | 0           |
| LINC00982 | CLCNKB     | 0.75458602  | 0           |
| LINC00982 | NCAM1      | 0.30005092  | 1.71E-10    |
| LINC00982 | HBA2       | 0.423924662 | 0           |
| LINC00982 | GLT8D2     | 0.505597319 | 0           |
| LINC00982 | OGDHL      | 0.464005708 | 0           |
| LINC00982 | LIFR       | 0.499888232 | 0           |
| LINC00982 | CSGALNACT1 | 0.484318203 | 0           |
| LINC00982 | RAP1GAP    | 0.503377142 | 0           |
| LINC00982 | COL9A3     | 0.663816922 | 0           |
| LINC00982 | FBLN1      | 0.17766746  | 0.000186889 |
| LINC00982 | EFEMP1     | 0.436201233 | 0           |

|           |          |             |            |
|-----------|----------|-------------|------------|
| LINC00982 | AOX1     | 0.467096142 | 3.57E-25   |
| LINC00982 | GRIN2C   | 0.652100466 | 0          |
| LINC00982 | C11orf74 | 0.695552129 | 0          |
| LINC00982 | PPARGC1A | 0.494457714 | 0          |
| LINC00982 | ANGPTL1  | 0.645185622 | 0          |
| LINC00982 | SCARA5   | 0.303362419 | 8.49E-11   |
| LINC00982 | LTF      | 0.540004028 | 0          |
| LINC00982 | CA4      | 0.702411055 | 1.61E-66   |
| LINC00982 | TG       | 0.615806188 | 0          |
| LINC00982 | FCGBP    | 0.703003543 | 0          |
| LINC00982 | PBX4     | 0.858842836 | 0          |
| LINC00982 | CYR61    | 0.484744707 | 0          |
| LINC00982 | FOS      | 0.48154472  | 0          |
| LINC00982 | KHDRBS2  | 0.679839838 | 0          |
| LINC00982 | MUM1L1   | 0.553358845 | 0          |
| LINC00982 | RGS16    | 0.53706417  | 0          |
| LINC00982 | MT1M     | 0.538273331 | 0          |
| LINC00982 | LRP2     | 0.499055507 | 0          |
| LINC00982 | MAFB     | 0.483508171 | 0          |
| LINC00982 | KCNK2    | 0.562339121 | 0          |
| LINC00982 | TBC1D4   | 0.558698162 | 0          |
| LINC00982 | MIOX     | 0.75308697  | 1.76E-81   |
| LINC00982 | TPPP     | 0.528457067 | 0          |
| LINC00982 | FMOD     | 0.448577232 | 0          |
| LINC00982 | CITED2   | 0.423460713 | 0          |
| LINC00982 | RGS8     | 0.640318119 | 5.05E-52   |
| LINC00982 | ABI3BP   | 0.286065211 | 1.23E-09   |
| LINC00982 | ADH1B    | 0.406913382 | 6.16E-19   |
| LINC00982 | OGN      | 0.231073779 | 9.87E-07   |
| LINC00982 | NR4A1    | 0.410804585 | 0          |
| LINC00982 | FOXJ1    | 0.762286524 | 1.36E-84   |
| LINC00982 | ALDH1A1  | 0.647096594 | 0          |
| LINC00982 | OCA2     | 0.632076506 | 2.40E-50   |
| LINC00982 | TMEM139  | 0.454190011 | 0          |
| LINC00982 | ARHGAP24 | 0.526502835 | 0          |
| LINC00982 | SLC25A15 | 0.442390296 | 0          |
| LINC00982 | DES      | 0.293963706 | 3.36E-10   |
| LINC00982 | GDF10    | 0.490558622 | 5.81E-28   |
| LINC00982 | KIAA1324 | 0.549990213 | 0          |
| LINC00982 | JUN      | 0.487414508 | 0          |
| LINC00982 | C7       | 0.159303239 | 0.00082018 |
| LINC00982 | LGI3     | 0.589890558 | 0          |
| LINC00982 | CDON     | 0.683794257 | 0          |
| LINC00982 | BCL2     | 0.592821481 | 0          |
| LINC00982 | HLF      | 0.621985039 | 0          |
| LINC00982 | EGR1     | 0.497340696 | 0          |
| LINC00982 | IP6K3    | 0.503527915 | 0          |
| LINC00982 | SCUBE3   | 0.575155666 | 0          |
| LINC00982 | PKNOX2   | 0.724476692 | 0          |
| LINC00982 | SMAD9    | 0.518696687 | 0          |
| LINC00982 | IQGAP2   | 0.501903738 | 0          |

|           |          |             |             |
|-----------|----------|-------------|-------------|
| LINC00982 | GNA14    | 0.670785381 | 0           |
| LINC00982 | LAYN     | 0.611877158 | 0           |
| LINC00982 | AVPRIA   | 0.57179753  | 0           |
| LINC00982 | PDLIM3   | 0.461483843 | 0           |
| LINC00982 | GPM6A    | 0.478137934 | 0           |
| LINC00982 | SDPR     | 0.514687802 | 0           |
| LINC00982 | CRYAB    | 0.207336809 | 1.24E-05    |
| LINC00982 | FOXA2    | 0.619977147 | 5.67E-48    |
| LINC00982 | C8orf88  | 0.502569096 | 0           |
| LINC00982 | ISM1     | 0.511788935 | 0           |
| LINC00982 | BMP2     | 0.373728217 | 4.39E-16    |
| LINC00982 | ID4      | 0.696508963 | 0           |
| LINC00982 | NUPR1    | 0.234997887 | 6.87E-07    |
| LINC00982 | SERTM1   | 0.427015516 | 6.98E-21    |
| LINC00982 | IRS1     | 0.616314532 | 0           |
| LINC00982 | FIBIN    | 0.124040401 | 0.009316271 |
| LINC00982 | PODN     | 0.235210075 | 6.71E-07    |
| LINC00982 | TDRD9    | 0.420265406 | 0           |
| LINC00982 | EPHA3    | 0.362381956 | 5.52E-15    |
| LINC00982 | AIF1L    | 0.477771994 | 0           |
| LINC00982 | EBF4     | 0.743177067 | 0           |
| LINC00982 | ADM2     | 0.516627283 | 0           |
| LINC00982 | GSTM3    | 0.58659866  | 0           |
| LINC00982 | HSD17B6  | 0.529692327 | 0           |
| LINC00982 | AGR3     | 0.477689783 | 2.09E-26    |
| LINC00982 | EPHB1    | 0.339425616 | 3.65E-13    |
| LINC00982 | TMOD1    | 0.314436467 | 2.02E-11    |
| LINC00982 | WASF3    | 0.543849091 | 0           |
| LINC00982 | SELV     | 0.696983903 | 4.19E-65    |
| LINC00982 | ENPP1    | 0.129663534 | 0.006550966 |
| LINC00982 | SYNE1    | 0.643223825 | 1.26E-52    |
| LINC00982 | PLCH1    | 0.555741283 | 0           |
| LINC00982 | CCDC146  | 0.75241265  | 0           |
| LINC00982 | SLC16A2  | 0.623314053 | 0           |
| LINC00982 | IER2     | 0.661459164 | 0           |
| LINC00982 | KCNAB1   | 0.738705793 | 0           |
| LINC00982 | SYNDIG1  | 0.543265006 | 0           |
| LINC00982 | C16orf89 | 0.686953963 | 0           |
| LINC00982 | CTGF     | 0.357409997 | 1.46E-14    |
| LINC00982 | NR4A3    | 0.176995719 | 0.000197799 |
| LINC00982 | KIAA1456 | 0.596291385 | 0           |
| LINC00982 | AQP4     | 0.390631799 | 0           |
| LINC00982 | RNF150   | 0.660665018 | 0           |
| LINC00982 | C1S      | 0.057099374 | 0.232406211 |
| LINC00982 | PFKFB2   | 0.338000295 | 4.64E-13    |
| LINC00982 | PROX1    | 0.511333212 | 0           |
| LINC00982 | TCF7L1   | 0.76435874  | 0           |
| LINC00982 | HSPB6    | 0.446154937 | 0           |
| LINC00982 | FHDC1    | 0.45520982  | 0           |
| LINC00982 | PRR15L   | 0.374630018 | 3.46E-16    |
| LINC00982 | SLC1A1   | 0.264281864 | 2.14E-08    |

|           |          |             |             |
|-----------|----------|-------------|-------------|
| LINC00982 | BTBD11   | 0.787092396 | 0           |
| LINC00982 | TRIM58   | 0.424073307 | 0           |
| LINC00982 | LRIG1    | 0.447478419 | 0           |
| LINC00982 | ROR2     | 0.446965111 | 0           |
| LINC00982 | GPR125   | 0.598428161 | 0           |
| LINC00982 | FLRT1    | 0.811124854 | 0           |
| LINC00982 | PGF      | 0.689417815 | 0           |
| LINC00982 | DUSP1    | 0.420479012 | 0           |
| LINC00982 | PLA2G7   | 0.511082302 | 0           |
| LINC00982 | PLSCR4   | 0.380913828 | 3.72E-17    |
| LINC00982 | FAM46B   | 0.364008261 | 3.97E-15    |
| LINC00982 | GLDC     | 0.548410289 | 0           |
| LINC00982 | ZBTB16   | 0.428448841 | 0           |
| LINC00982 | OMD      | 0.138362009 | 0.003675774 |
| LINC00982 | HSD11B2  | 0.710499635 | 0           |
| LINC00982 | FGL2     | 0.174962626 | 0.000234568 |
| LINC00982 | CLCNKA   | 0.785941415 | 2.75E-93    |
| LINC00982 | GATM     | 0.435949046 | 0           |
| LINC00982 | TNS3     | 0.418565346 | 0           |
| LINC00982 | TOB1     | 0.41307015  | 0           |
| LINC00982 | MARC2    | 0.660939472 | 0           |
| LINC00982 | LRRC2    | 0.446437477 | 0           |
| LINC00982 | SORD     | 0.412453726 | 0           |
| LINC00982 | RIMS4    | 0.560093698 | 0           |
| LINC00982 | SLC29A4  | 0.741886632 | 0           |
| LINC00982 | SLC39A14 | 0.408668518 | 0           |
| LINC00982 | FAXDC2   | 0.678031556 | 0           |
| LINC00982 | HSPB8    | 0.263820752 | 2.27E-08    |
| LINC00982 | CCL19    | 0.025233272 | 0.598004471 |
| LINC00982 | KCNIP3   | 0.728178925 | 0           |
| LINC00982 | CGNL1    | 0.506715563 | 0           |
| LINC00982 | ATF3     | 0.195825024 | 3.73E-05    |
| LINC00982 | SGCD     | 0.298738359 | 2.07E-10    |
| LINC00982 | STARD13  | 0.578398772 | 0           |
| LINC00982 | LDHD     | 0.62256416  | 0           |
| LINC00982 | RCAN1    | 0.391013625 | 0           |
| LINC00982 | ID3      | 0.549826391 | 0           |
| LINC00982 | SYTL3    | 0.550885773 | 0           |
| LINC00982 | MT1E     | 0.436482496 | 0           |
| LINC00982 | CAMK1D   | 0.534224591 | 0           |
| LINC00982 | PRKCQ    | 0.622543452 | 0           |
| LINC00982 | NUAK2    | 0.400569334 | 0           |
| LINC00982 | LIPG     | 0.643409821 | 0           |
| LINC00982 | SLC25A25 | 0.241278293 | 3.38E-07    |
| LINC00982 | PRKX     | 0.312101544 | 2.88E-11    |
| LINC00982 | SRPX     | 0.29547114  | 3.30E-10    |
| LINC00982 | FAM189A1 | 0.661474908 | 0           |
| LINC00982 | PLEKHH1  | 0.62187313  | 0           |
| LINC00982 | WNT11    | 0.605999852 | 0           |
| LINC00982 | SNAI1    | 0.447338143 | 0           |
| LINC00982 | FDCSP    | 0.045646646 | 0.339995544 |

|           |          |             |             |
|-----------|----------|-------------|-------------|
| LINC00982 | MT1X     | 0.42118834  | 0           |
| LINC00982 | ACACB    | 0.667700139 | 0           |
| LINC00982 | ARC      | 0.33470939  | 8.05E-13    |
| LINC00982 | KLK4     | 0.179779541 | 0.000152502 |
| LINC00982 | ZFPM2    | 0.461612348 | 0           |
| LINC00982 | AKAP12   | 0.336348602 | 6.12E-13    |
| LINC00982 | GJB6     | 0.436468374 | 7.62E-22    |
| LINC00982 | ERO1LB   | 0.612998097 | 0           |
| LINC00982 | DNALI1   | 0.730130178 | 0           |
| LINC00982 | HKDC1    | 0.323641271 | 4.84E-12    |
| LINC00982 | ZFP36L2  | 0.557554955 | 0           |
| LINC00982 | CAPSL    | 0.673297726 | 2.79E-59    |
| LINC00982 | CYP7B1   | 0.416986699 | 0           |
| LINC00982 | CPQ      | 0.620203848 | 0           |
| LINC00982 | RPS6KA6  | 0.725626946 | 5.89E-73    |
| LINC00982 | TLE1     | 0.44649563  | 0           |
| LINC00982 | TP53INP2 | 0.648469152 | 0           |
| LINC00982 | KATNAL2  | 0.754409716 | 0           |
| LINC00982 | SGPP2    | 0.128419622 | 0.007089756 |
| LINC00982 | CTH      | 0.468725905 | 0           |
| LINC00982 | KIF12    | 0.635060862 | 0           |
| LINC00982 | TMEM220  | 0.583840779 | 0           |
| LINC00982 | CENPJ    | 0.562340823 | 0           |
| LINC00982 | FAM155B  | 0.587564004 | 0           |
| LINC00982 | WFS1     | 0.665066507 | 0           |
| LINC00982 | SELENBP1 | 0.633751422 | 0           |
| LINC00982 | SNTA1    | 0.472450265 | 0           |
| LINC00982 | FRAS1    | 0.20879376  | 1.08E-05    |
| LINC00982 | FBLN7    | 0.491725789 | 0           |
| LINC00982 | AGPAT9   | 0.524521371 | 0           |
| LINC00982 | GPR83    | 0.670944096 | 0           |
| LINC00982 | PRTG     | 0.529603679 | 0           |
| LINC00982 | EGR3     | 0.296756752 | 2.75E-10    |
| LINC00982 | GRAMD2   | 0.500283107 | 0           |
| LINC00982 | HYOU1    | 0.507768562 | 0           |
| LINC00982 | FBLN5    | 0.370898992 | 8.81E-16    |
| LINC00982 | ITM2A    | 0.599041607 | 0           |
| LINC00982 | SRF      | 0.580412008 | 0           |
| LINC00982 | FGFR2    | 0.525830811 | 0           |
| LINC00982 | MT1A     | 0.252347839 | 8.36E-08    |
| LINC00982 | MAMDC2   | 0.243433224 | 2.64E-07    |
| LINC00982 | FHL2     | 0.366721889 | 2.24E-15    |
| LINC00982 | FTCDNL1  | 0.398691836 | 0           |
| LINC00982 | PKIA     | 0.552145003 | 0           |
| LINC00982 | DNAJB4   | 0.444782379 | 0           |
| LINC00982 | SLC25A33 | 0.603457706 | 0           |
| LINC00982 | EYA2     | 0.287738322 | 9.74E-10    |
| LINC00982 | LPAR1    | 0.178132686 | 0.000179666 |
| LINC00982 | STX11    | 0.090219053 | 0.058944159 |
| LINC00982 | ARHGEF28 | 0.341793729 | 2.43E-13    |
| LINC00982 | OR2W3    | 0.539108752 | 0           |



|           |          |             |             |
|-----------|----------|-------------|-------------|
| LINC00982 | ALDH1B1  | 0.284011136 | 1.37E-09    |
| LINC00982 | CXCL12   | 0.245896794 | 1.99E-07    |
| LINC00982 | OLFM2    | 0.650541818 | 0           |
| LINC00982 | TUB      | 0.479235186 | 0           |
| LINC00982 | HTRA3    | 0.346571513 | 1.06E-13    |
| LINC00982 | CKB      | 0.579592474 | 0           |
| LINC00982 | RGS2     | 0.086159533 | 0.071328175 |
| LINC00982 | SHANK2   | 0.677571294 | 0           |
| LINC00982 | CNTFR    | 0.548006924 | 8.95E-36    |
| LINC00982 | CYTH3    | 0.558141309 | 0           |
| LINC00982 | PLAC9    | 0.572206163 | 0           |
| LINC00982 | WVOX     | 0.690801153 | 0           |
| LINC00982 | NPR3     | 0.485153766 | 0           |
| LINC00982 | SDC2     | 0.526609781 | 0           |
| LINC00982 | KLF15    | 0.578979595 | 0           |
| LINC00982 | TMEM164  | 0.537023888 | 0           |
| LINC00982 | LONRF3   | 0.272468136 | 7.52E-09    |
| LINC00982 | GBP1     | 0.158041314 | 0.000902984 |
| LINC00982 | ARHGAP6  | 0.412438833 | 0           |
| LINC00982 | TMEM119  | 0.168521518 | 0.000397721 |
| LINC00982 | SH3RF1   | 0.367794745 | 1.78E-15    |
| LINC00982 | CRELD2   | 0.678613372 | 0           |
| LINC00982 | PCP4     | 0.245751269 | 2.02E-07    |
| LINC00982 | GCSH     | 0.693862424 | 0           |
| LINC00982 | IMPA2    | 0.566066317 | 0           |
| LINC00982 | C1R      | 0.080505337 | 0.092040145 |
| LINC00982 | SUCNR1   | 0.385278724 | 0           |
| LINC00982 | SFRP1    | 0.370849633 | 8.91E-16    |
| LINC00982 | UGT8     | 0.412704636 | 0           |
| LINC00982 | TLE4     | 0.329305679 | 1.95E-12    |
| LINC00982 | ANTXR1   | 0.338562679 | 4.22E-13    |
| LINC00982 | GPX3     | 0.44450296  | 0           |
| LINC00982 | DPY19L2  | 0.68226199  | 0           |
| LINC00982 | FAM46C   | 0.387348128 | 0           |
| LINC00982 | IL33     | 0.273548448 | 5.66E-09    |
| LINC00982 | PEG3     | 0.555761566 | 0           |
| LINC00982 | FAHD2A   | 0.70395215  | 0           |
| LINC00982 | PTGDS    | 0.143089553 | 0.002677766 |
| LINC00982 | CHCHD10  | 0.444997121 | 0           |
| LINC00982 | CD36     | 0.517958425 | 0           |
| LINC00982 | ANKRD37  | 0.709922926 | 0           |
| LINC00982 | TSPAN33  | 0.519883722 | 0           |
| LINC00982 | PRDM16   | 0.790123313 | 0           |
| LINC00982 | UST      | 0.574891566 | 0           |
| LINC00982 | NEXN     | 0.476284406 | 0           |
| LINC00982 | NUPR1L   | 0.408671287 | 4.22E-19    |
| LINC00982 | SLC24A3  | 0.396943126 | 0           |
| LINC00982 | MARC1    | 0.683947299 | 0           |
| LINC00982 | MYH11    | 0.375534939 | 2.69E-16    |
| LINC00982 | APOA1    | 0.760861347 | 4.22E-84    |
| LINC00982 | TMEM178B | 0.466945708 | 0           |

|           |          |              |             |
|-----------|----------|--------------|-------------|
| LINC00982 | CAPN6    | 0.320709725  | 5.86E-12    |
| LINC00982 | PPM1L    | 0.536472284  | 0           |
| LINC00982 | FZD8     | 0.695284483  | 0           |
| LINC00982 | RCAN2    | 0.581594788  | 0           |
| LINC00982 | COPZ2    | 0.545403768  | 0           |
| LINC00982 | GAS1     | 0.200538272  | 2.40E-05    |
| LINC00982 | DACT1    | 0.512235864  | 0           |
| LINC00982 | WBSCR17  | 0.672101913  | 0           |
| LINC00982 | NCS1     | 0.562421954  | 0           |
| LINC00982 | SPIRE2   | 0.649808945  | 0           |
| LINC00982 | C15orf52 | 0.303793576  | 9.94E-11    |
| LINC00982 | SPAG5    | 0.551465745  | 0           |
| LINC00982 | ARL4D    | 0.408795321  | 0           |
| LINC00982 | FAM189A2 | 0.638657143  | 0           |
| LINC00982 | MAP1LC3A | 0.759049776  | 0           |
| LINC00982 | KLF6     | 0.095370436  | 0.045845642 |
| LINC00982 | ADD3     | 0.348361781  | 7.72E-14    |
| LINC00982 | TSPAN7   | 0.576595313  | 0           |
| LINC00982 | KLF9     | 0.420204558  | 0           |
| LINC00982 | KCNQ1    | 0.588773307  | 0           |
| LINC00982 | MAN1A1   | 0.141885072  | 0.002910621 |
| LINC00982 | MLF1     | 0.39840263   | 0           |
| LINC00982 | RARB     | 0.612106934  | 0           |
| LINC00982 | CDC42EP2 | 0.538006961  | 0           |
| LINC00982 | FAM3B    | 0.244524803  | 2.33E-07    |
| LINC00982 | GADD45B  | 0.337330256  | 5.20E-13    |
| LINC00982 | TMEM47   | 0.526138881  | 0           |
| LINC00982 | SDF2L1   | 0.636838223  | 0           |
| LINC00982 | CCDC85A  | 0.290517337  | 6.63E-10    |
| LINC00982 | CRYBG3   | 0.040802288  | 0.393612166 |
| LINC00982 | FBLN2    | 0.060722036  | 0.204066288 |
| LINC00982 | PEBP4    | 0.211508665  | 8.22E-06    |
| LINC00982 | CDADC1   | 0.714649506  | 0           |
| LINC00982 | FAM63A   | 0.464459161  | 0           |
| LINC00982 | GLUL     | 0.325033261  | 3.88E-12    |
| LINC00982 | FREM2    | 0.289504336  | 7.63E-10    |
| LINC00982 | ACKR3    | 0.580017276  | 0           |
| LINC00982 | DENND6A  | 0.612281677  | 0           |
| LINC00982 | CLDN8    | 0.062517694  | 0.190987204 |
| LINC00982 | UTS2R    | 0.323417075  | 3.80E-12    |
| LINC00982 | SCNN1B   | 0.548032152  | 0           |
| LINC00982 | TTC30A   | 0.519307438  | 0           |
| LINC00982 | CORO2B   | 0.659318983  | 0           |
| LINC00982 | TC2N     | 0.184800733  | 0.000101039 |
| LINC00982 | ALDH2    | 0.508628095  | 0           |
| LINC00982 | GPR183   | -0.005647104 | 0.906043484 |
| LINC00982 | C4orf47  | 0.729524675  | 0           |
| LINC00982 | SLC25A42 | 0.764038614  | 0           |
| LINC00982 | LGMN     | 0.443460883  | 0           |
| LINC00982 | ACSF2    | 0.605158049  | 0           |
| LINC00982 | KIAA1467 | 0.436738086  | 0           |

|           |          |              |             |
|-----------|----------|--------------|-------------|
| LINC00982 | PRKG1    | 0.601541486  | 0           |
| LINC00982 | GNAI1    | 0.54355875   | 0           |
| LINC00982 | ABCC4    | 0.299384285  | 1.89E-10    |
| LINC00982 | PRPS1    | 0.48406474   | 0           |
| LINC00982 | TSPAN5   | 0.334571241  | 8.23E-13    |
| LINC00982 | CR2      | 0.133421528  | 0.005109469 |
| LINC00982 | CCDC170  | 0.488517291  | 0           |
| LINC00982 | RRAD     | 0.049909082  | 0.296646459 |
| LINC00982 | SCGB2A1  | 0.510886     | 0           |
| LINC00982 | SESN3    | 0.331589115  | 1.35E-12    |
| LINC00982 | SGK223   | 0.348910975  | 7.00E-14    |
| LINC00982 | NDRG2    | 0.650150064  | 0           |
| LINC00982 | C3orf52  | 0.211171092  | 8.50E-06    |
| LINC00982 | FLRT3    | -0.324221101 | 4.41E-12    |
| LINC00982 | MST1R    | -0.512690594 | 0           |
| LINC00982 | SDC1     | -0.520687087 | 0           |
| LINC00982 | ST8SIA4  | -0.571335567 | 0           |
| LINC00982 | UBTD1    | -0.187539466 | 7.93E-05    |
| LINC00982 | EPHA2    | -0.342349163 | 2.21E-13    |
| LINC00982 | TMEM130  | -0.060250286 | 0.207607772 |
| LINC00982 | SPINK2   | -0.509803783 | 0           |
| LINC00982 | MMP16    | -0.542337249 | 0           |
| LINC00982 | SIGLEC15 | -0.441389351 | 0           |
| LINC00982 | RIN1     | -0.359415007 | 9.92E-15    |
| LINC00982 | IL1RN    | -0.665415001 | 0           |
| LINC00982 | FCER1G   | -0.316588278 | 1.45E-11    |
| LINC00982 | CD276    | -0.521644914 | 0           |
| LINC00982 | CTSB     | -0.533796384 | 0           |
| LINC00982 | FAM171A2 | 0.01108287   | 0.816810442 |
| LINC00982 | ASPHD1   | -0.533931839 | 0           |
| LINC00982 | C15orf48 | -0.490875476 | 0           |
| LINC00982 | DYSF     | -0.069709971 | 0.144739334 |
| LINC00982 | PDZRN4   | 0.019364031  | 0.685654741 |
| LINC00982 | EFHD2    | -0.062356709 | 0.19213404  |
| LINC00982 | ASF1B    | -0.438548637 | 0           |
| LINC00982 | AQP1     | -0.118143238 | 0.013289197 |
| LINC00982 | ARRDC2   | -0.199526973 | 2.64E-05    |
| LINC00982 | PRSS1    | -0.332348262 | 8.82E-13    |
| LINC00982 | MAPK13   | -0.640927388 | 0           |
| LINC00982 | CST5     | -0.514021077 | 5.66E-31    |
| LINC00982 | AHR      | -0.553820099 | 0           |
| LINC00982 | BAX      | -0.326925935 | 2.87E-12    |
| LINC00982 | C1orf115 | -0.204300076 | 1.67E-05    |
| LINC00982 | PLK3     | -0.366575087 | 2.32E-15    |
| LINC00982 | JAG2     | -0.083795108 | 0.07947187  |
| LINC00982 | RAD23B   | -0.560050437 | 0           |
| LINC00982 | CA12     | 0.145561207  | 0.002252255 |
| LINC00982 | ADTRP    | -0.252527821 | 9.07E-08    |
| LINC00982 | UCP2     | -0.209481954 | 1.01E-05    |
| LINC00982 | IGFBP2   | -0.115705342 | 0.015326651 |
| LINC00982 | LOXL2    | -0.24579921  | 2.01E-07    |

|           |          |              |             |
|-----------|----------|--------------|-------------|
| LINC00982 | GPX1     | -0.305944962 | 7.24E-11    |
| LINC00982 | P3H3     | -0.274157842 | 6.04E-09    |
| LINC00982 | C2orf81  | -0.135005971 | 0.004630944 |
| LINC00982 | CDT1     | -0.415953557 | 0           |
| LINC00982 | SNX25    | -0.259374016 | 3.95E-08    |
| LINC00982 | MTHFD1L  | -0.546749518 | 0           |
| LINC00982 | CDC42BPG | -0.573593351 | 9.09E-40    |
| LINC00982 | MSN      | -0.681900447 | 0           |
| LINC00982 | SIGLEC6  | -0.37814734  | 2.26E-16    |
| LINC00982 | F2R      | -0.199219612 | 2.72E-05    |
| LINC00982 | TMEM184A | -0.483323074 | 0           |
| LINC00982 | CKS2     | -0.244579127 | 2.31E-07    |
| LINC00982 | TAX1BP3  | -0.426023993 | 0           |
| LINC00982 | PMEPA1   | -0.426646233 | 0           |
| LINC00982 | CXCL16   | -0.62033987  | 0           |
| LINC00982 | FAXC     | -0.54506733  | 0           |
| LINC00982 | VTCN1    | -0.63577988  | 4.30E-51    |
| LINC00982 | SH2D4A   | -0.51773106  | 0           |
| LINC00982 | RNF24    | -0.407722464 | 0           |
| LINC00982 | LY6G6C   | -0.487528434 | 1.37E-27    |
| LINC00982 | NID1     | -0.364770777 | 3.39E-15    |
| LINC00982 | STAC     | -0.64695348  | 0           |
| LINC00982 | RAB34    | -0.279985646 | 2.79E-09    |
| LINC00982 | HES4     | -0.062924909 | 0.188108712 |
| LINC00982 | EPHA10   | -0.541949466 | 0           |
| LINC00982 | ENTPD2   | -0.290895475 | 6.29E-10    |
| LINC00982 | DDB2     | -0.459064811 | 0           |
| LINC00982 | NKAIN4   | -0.170656025 | 0.00033456  |
| LINC00982 | TRIM29   | -0.375046026 | 3.09E-16    |
| LINC00982 | ADCY8    | -0.559654777 | 1.50E-37    |
| LINC00982 | SFTA2    | -0.4394259   | 0           |
| LINC00982 | NRIP1    | -0.488902379 | 0           |
| LINC00982 | VWA1     | 0.116845712  | 0.01434174  |
| LINC00982 | APLNR    | -0.117892896 | 0.013486804 |
| LINC00982 | REN      | -0.379322117 | 1.80E-16    |
| LINC00982 | EDIL3    | -0.247770037 | 1.59E-07    |
| LINC00982 | AGRN     | -0.320080308 | 8.47E-12    |
| LINC00982 | TREM1    | -0.535399428 | 0           |
| LINC00982 | SRL      | -0.329563255 | 1.87E-12    |
| LINC00982 | RASGRF1  | -0.387854345 | 0           |
| LINC00982 | RMI2     | -0.371618957 | 7.42E-16    |
| LINC00982 | SAMD1    | -0.259784067 | 3.75E-08    |
| LINC00982 | MGAT4B   | -0.556661239 | 0           |
| LINC00982 | NXN      | -0.490994193 | 0           |
| LINC00982 | SH3BGRL3 | -0.408791633 | 0           |
| LINC00982 | CA11     | -0.148145338 | 0.001874242 |
| LINC00982 | PLD3     | -0.118048066 | 0.013364018 |
| LINC00982 | LURAP1L  | -0.67497298  | 0           |
| LINC00982 | CARNS1   | -0.097306229 | 0.041601196 |
| LINC00982 | PDLIM7   | -0.22092665  | 3.14E-06    |
| LINC00982 | BCL2L1   | -0.603258141 | 0           |

|           |          |              |             |
|-----------|----------|--------------|-------------|
| LINC00982 | GGT6     | -0.253911017 | 7.68E-08    |
| LINC00982 | DPYSL3   | -0.31090841  | 3.45E-11    |
| LINC00982 | FYN      | -0.44858092  | 0           |
| LINC00982 | TK1      | -0.395932537 | 0           |
| LINC00982 | AK1      | -0.176144271 | 0.000212487 |
| LINC00982 | HIGD1B   | 0.078384163  | 0.100955798 |
| LINC00982 | TMEM59L  | -0.187909377 | 7.67E-05    |
| LINC00982 | MEGF9    | -0.534880162 | 0           |
| LINC00982 | ZFP36L1  | -0.508515901 | 0           |
| LINC00982 | ADRA1B   | -0.317608229 | 1.24E-11    |
| LINC00982 | EPHA4    | -0.528511533 | 0           |
| LINC00982 | TCERG1L  | 0.001562762  | 0.97394402  |
| LINC00982 | NGFR     | -0.141191489 | 0.003052928 |
| LINC00982 | EBI3     | -0.473647654 | 0           |
| LINC00982 | S100A10  | -0.480662777 | 0           |
| LINC00982 | S100B    | -0.421529884 | 0           |
| LINC00982 | CD44     | -0.2069686   | 1.29E-05    |
| LINC00982 | BHLHE41  | -0.403174031 | 0           |
| LINC00982 | FBXO2    | -0.230199253 | 1.17E-06    |
| LINC00982 | SLC30A2  | -0.459842504 | 0           |
| LINC00982 | FRMD5    | -0.729160438 | 0           |
| LINC00982 | SAMD11   | -0.104272702 | 0.028966252 |
| LINC00982 | SIPA1L2  | -0.349755047 | 6.01E-14    |
| LINC00982 | S100A16  | -0.532390778 | 0           |
| LINC00982 | PPL      | -0.652470803 | 0           |
| LINC00982 | ARHGD1B  | -0.109087363 | 0.022298956 |
| LINC00982 | CDC42EP3 | -0.630029757 | 0           |
| LINC00982 | RUNX2    | -0.392928142 | 0           |
| LINC00982 | LAMC2    | -0.682064127 | 0           |
| LINC00982 | BRINP1   | -0.411080317 | 0           |
| LINC00982 | GPRC5B   | -0.514071236 | 0           |
| LINC00982 | AQP5     | 0.041253897  | 0.38839415  |
| LINC00982 | PLAG1    | -0.225635359 | 1.91E-06    |
| LINC00982 | PTPRU    | -0.495112292 | 0           |
| LINC00982 | ANGPTL4  | -0.414765387 | 0           |
| LINC00982 | PALM3    | -0.214954172 | 5.81E-06    |
| LINC00982 | ACP5     | -0.338080433 | 4.58E-13    |
| LINC00982 | DLG4     | -0.177620512 | 0.000187632 |
| LINC00982 | ETNK2    | -0.3336988   | 9.51E-13    |
| LINC00982 | CD109    | -0.445415257 | 0           |
| LINC00982 | SNX22    | -0.171354857 | 0.000316006 |
| LINC00982 | TMEM98   | -0.423083851 | 0           |
| LINC00982 | CTHRC1   | -0.362816971 | 5.06E-15    |
| LINC00982 | S100A2   | -0.466923014 | 0           |
| LINC00982 | C11orf80 | -0.531019355 | 0           |
| LINC00982 | SREBF1   | -0.388591614 | 0           |
| LINC00982 | PRSS22   | -0.472877904 | 0           |
| LINC00982 | CMTM3    | -0.414604544 | 0           |
| LINC00982 | RDH5     | -0.333475832 | 9.87E-13    |
| LINC00982 | MYH10    | -0.56323383  | 0           |
| LINC00982 | EVPL     | -0.406760241 | 0           |

|           |          |              |             |
|-----------|----------|--------------|-------------|
| LINC00982 | SCD      | -0.538437295 | 0           |
| LINC00982 | CD151    | -0.311713052 | 3.06E-11    |
| LINC00982 | S100A4   | -0.422770249 | 0           |
| LINC00982 | BNIP1    | -0.231222466 | 1.04E-06    |
| LINC00982 | MAP3K6   | -0.475846413 | 0           |
| LINC00982 | MANEAL   | -0.505453921 | 0           |
| LINC00982 | CD207    | -0.415197576 | 1.01E-19    |
| LINC00982 | CD1A     | -0.450002695 | 2.83E-23    |
| LINC00982 | C3       | -0.349167416 | 6.68E-14    |
| LINC00982 | NT5E     | -0.439701915 | 0           |
| LINC00982 | CACNG4   | -0.450915737 | 2.26E-23    |
| LINC00982 | FHOD1    | -0.263032421 | 2.50E-08    |
| LINC00982 | LEMD1    | -0.539091874 | 0           |
| LINC00982 | ATP11A   | -0.213844297 | 6.50E-06    |
| LINC00982 | PPAP2C   | -0.203007515 | 1.89E-05    |
| LINC00982 | DRAM1    | -0.499898586 | 0           |
| LINC00982 | CDA      | -0.09572432  | 0.045043603 |
| LINC00982 | CCND2    | -0.222894499 | 2.55E-06    |
| LINC00982 | LCN6     | -0.016308363 | 0.73329436  |
| LINC00982 | CDH4     | -0.414752764 | 0           |
| LINC00982 | MMP11    | -0.472182618 | 0           |
| LINC00982 | B3GAT1   | -0.308609514 | 4.88E-11    |
| LINC00982 | SPP1     | -0.364476039 | 3.60E-15    |
| LINC00982 | HLA-DQB1 | -0.440163169 | 0           |
| LINC00982 | SDC3     | -0.350531322 | 5.23E-14    |
| LINC00982 | CX3CL1   | -0.465543789 | 0           |
| LINC00982 | SDK1     | -0.208575615 | 1.10E-05    |
| LINC00982 | DOCK9    | -0.566575087 | 0           |
| LINC00982 | CSF2     | -0.521077668 | 6.31E-32    |
| LINC00982 | GRHL3    | -0.636742909 | 0           |
| LINC00982 | TMEM92   | -0.595937724 | 1.49E-43    |
| LINC00982 | BASP1    | -0.438143267 | 0           |
| LINC00982 | HRH1     | -0.523232497 | 0           |
| LINC00982 | ESM1     | 0.026043567  | 0.586159013 |
| LINC00982 | B4GALNT3 | -0.500816698 | 0           |
| LINC00982 | LMO3     | -0.277316271 | 3.98E-09    |
| LINC00982 | C9orf16  | -0.430243648 | 0           |
| LINC00982 | SEMA3F   | -0.071634701 | 0.133948541 |
| LINC00982 | PLA2G12B | -0.268605141 | 1.08E-08    |
| LINC00982 | KLK6     | -0.30730924  | 4.69E-11    |
| LINC00982 | ST3GAL5  | -0.265653004 | 1.80E-08    |
| LINC00982 | FAM132B  | -0.093431097 | 0.050456921 |
| LINC00982 | CDKN1A   | -0.352289393 | 3.80E-14    |
| LINC00982 | E2F1     | -0.474556263 | 0           |
| LINC00982 | B3GNT8   | -0.25597035  | 5.98E-08    |
| LINC00982 | MTMR11   | -0.524021537 | 0           |
| LINC00982 | MYO1G    | -0.436612702 | 0           |
| LINC00982 | TMSB10   | -0.343406275 | 1.84E-13    |
| LINC00982 | UNC5CL   | -0.6081406   | 0           |
| LINC00982 | ABR      | -0.577850855 | 0           |
| LINC00982 | PLP2     | -0.478317074 | 0           |

|           |          |              |             |
|-----------|----------|--------------|-------------|
| LINC00982 | SRCIN1   | -0.452265281 | 0           |
| LINC00982 | PDE9A    | -0.565806046 | 0           |
| LINC00982 | TREM2    | -0.276994585 | 4.16E-09    |
| LINC00982 | KDELR3   | -0.473114914 | 0           |
| LINC00982 | PC       | -0.475708547 | 0           |
| LINC00982 | C2CD4A   | -0.659011338 | 0           |
| LINC00982 | PELI1    | -0.535733596 | 0           |
| LINC00982 | SSX1     | -0.203637697 | 1.78E-05    |
| LINC00982 | MROH6    | -0.46142796  | 0           |
| LINC00982 | ESPN     | -0.323385255 | 5.04E-12    |
| LINC00982 | BMP1     | -0.247528772 | 1.64E-07    |
| LINC00982 | TM4SF4   | -0.447485261 | 5.29E-23    |
| LINC00982 | CORO2A   | -0.564453346 | 0           |
| LINC00982 | CD164L2  | -0.438110092 | 5.15E-22    |
| LINC00982 | CTSS     | -0.522533098 | 0           |
| LINC00982 | CLU      | -0.31873087  | 1.04E-11    |
| LINC00982 | TMSB4X   | -0.399984965 | 0           |
| LINC00982 | WNT10A   | -0.305809943 | 5.88E-11    |
| LINC00982 | NAPSA    | -0.31009157  | 3.91E-11    |
| LINC00982 | PLEKHA4  | -0.315824911 | 1.64E-11    |
| LINC00982 | SFTPA1   | -0.063063274 | 0.187213198 |
| LINC00982 | C1orf116 | -0.55892964  | 0           |
| LINC00982 | TM4SF1   | -0.472884854 | 0           |
| LINC00982 | SEL1L3   | -0.432435599 | 0           |
| LINC00982 | VASN     | -0.422584017 | 0           |
| LINC00982 | NPTXR    | -0.640105584 | 0           |
| LINC00982 | PDE4C    | -0.484034245 | 0           |
| LINC00982 | CDC42EP1 | -0.45939515  | 0           |
| LINC00982 | ENDOD1   | -0.655173368 | 0           |
| LINC00982 | RYR1     | -0.363057101 | 4.82E-15    |
| LINC00982 | IL1RAP   | -0.546906107 | 0           |
| LINC00982 | SLC35F2  | -0.554182868 | 1.05E-36    |
| LINC00982 | ISYNA1   | -0.114069392 | 0.016843158 |
| LINC00982 | HLA-G    | -0.487757895 | 0           |
| LINC00982 | CDKN2B   | -0.61763305  | 0           |
| LINC00982 | ALDH1A3  | -0.517848501 | 0           |
| LINC00982 | CLIP3    | -0.263234965 | 2.44E-08    |
| LINC00982 | ULBP2    | -0.475118221 | 0           |
| LINC00982 | ETHE1    | -0.61393252  | 0           |
| LINC00982 | XPR1     | -0.522553522 | 0           |
| LINC00982 | SPTBN2   | -0.705433213 | 0           |
| LINC00982 | IVL      | -0.60690262  | 1.60E-45    |
| LINC00982 | MARCO    | -0.449189543 | 0           |
| LINC00982 | PLXND1   | -0.157568571 | 0.000935945 |
| LINC00982 | EMILIN2  | -0.47280656  | 0           |
| LINC00982 | PLAUR    | -0.533584054 | 0           |
| LINC00982 | CDC42EP5 | -0.324287907 | 4.37E-12    |
| LINC00982 | TRPC5    | -0.232593726 | 8.34E-07    |
| LINC00982 | TMEM100  | -0.348274977 | 7.84E-14    |
| LINC00982 | QSOX1    | -0.548951965 | 0           |
| LINC00982 | ARHGAP23 | -0.378561601 | 1.03E-16    |

|           |           |              |             |
|-----------|-----------|--------------|-------------|
| LINC00982 | MDFI      | -0.182848487 | 0.000119833 |
| LINC00982 | FSTL3     | -0.395451    | 0           |
| LINC00982 | INF2      | -0.386787588 | 0           |
| LINC00982 | TGFBR1    | -0.576872037 | 0           |
| LINC00982 | TGFBI     | -0.313495661 | 2.34E-11    |
| LINC00982 | ERBB3     | -0.627001393 | 0           |
| LINC00982 | CCL18     | -0.33498427  | 7.69E-13    |
| LINC00982 | CCL17     | -0.46196256  | 1.36E-24    |
| LINC00982 | C16orf45  | -0.229822392 | 1.21E-06    |
| LINC00982 | PRDM1     | -0.202849366 | 1.92E-05    |
| LINC00982 | TRIM47    | -0.516426016 | 0           |
| LINC00982 | CNFN      | -0.386988571 | 0           |
| LINC00982 | ARMCX3    | -0.322574372 | 5.73E-12    |
| LINC00982 | RAMP1     | -0.130642778 | 0.006152969 |
| LINC00982 | GABRD     | 0.101801899  | 0.033007866 |
| LINC00982 | COL13A1   | -0.153093184 | 0.001307859 |
| LINC00982 | S100A5    | -0.422292116 | 0           |
| LINC00982 | MISP      | -0.440121611 | 0           |
| LINC00982 | HES6      | -0.134235796 | 0.004872004 |
| LINC00982 | PSD3      | -0.633614549 | 0           |
| LINC00982 | DOK7      | -0.361437179 | 6.67E-15    |
| LINC00982 | ZMAT3     | -0.626323128 | 0           |
| LINC00982 | MFAP2     | -0.192004499 | 5.30E-05    |
| LINC00982 | TMEM79    | -0.489158679 | 0           |
| LINC00982 | SLC1A5    | -0.361787233 | 6.22E-15    |
| LINC00982 | BBC3      | -0.34573283  | 1.23E-13    |
| LINC00982 | HLA-DQB2  | -0.409848319 | 0           |
| LINC00982 | C1QL1     | -0.229712326 | 1.23E-06    |
| LINC00982 | TMEM215   | -0.08981697  | 0.060065719 |
| LINC00982 | PNP       | -0.432123841 | 0           |
| LINC00982 | ARNTL     | -0.390806826 | 0           |
| LINC00982 | CLDN2     | -0.260123209 | 3.20E-08    |
| LINC00982 | MVP       | -0.56661622  | 0           |
| LINC00982 | LGALS1    | -0.373234482 | 4.98E-16    |
| LINC00982 | BIRC7     | -0.389477096 | 2.37E-17    |
| LINC00982 | COL8A1    | -0.617375616 | 0           |
| LINC00982 | PERP      | -0.693314365 | 0           |
| LINC00982 | GJA4      | -0.057818063 | 0.226573257 |
| LINC00982 | IGFL2     | -0.428505351 | 4.94E-21    |
| LINC00982 | DAPK2     | -0.370778289 | 9.06E-16    |
| LINC00982 | MAMLD1    | -0.509799953 | 0           |
| LINC00982 | ETV5      | -0.243164443 | 2.73E-07    |
| LINC00982 | RUNX1     | -0.683562353 | 0           |
| LINC00982 | LONRF2    | -0.249303296 | 1.33E-07    |
| LINC00982 | SPOCK1    | -0.096255642 | 0.043861597 |
| LINC00982 | XKRX      | -0.333206342 | 1.03E-12    |
| LINC00982 | TGFBI     | -0.111519019 | 0.01946951  |
| LINC00982 | ERP27     | -0.277711571 | 3.78E-09    |
| LINC00982 | TNFRSF10C | -0.488358576 | 0           |
| LINC00982 | PALM      | -0.320789919 | 7.58E-12    |
| LINC00982 | TSC22D1   | -0.192831268 | 4.92E-05    |



|           |          |              |             |
|-----------|----------|--------------|-------------|
| LINC00982 | TGM2     | -0.605622708 | 0           |
| LINC00982 | UBE2QL1  | -0.190536059 | 6.06E-05    |
| LINC00982 | ECE1     | -0.437586272 | 0           |
| LINC00982 | COL8A2   | -0.515501947 | 0           |
| LINC00982 | HIST3H2A | -0.426672898 | 0           |
| LINC00982 | TNFRSF21 | -0.557172278 | 0           |
| LINC00982 | SOX4     | -0.489909848 | 0           |
| LINC00982 | ELF3     | -0.632161428 | 0           |
| LINC00982 | TPD52L1  | -0.505433213 | 0           |
| LINC00982 | INHBB    | -0.238542255 | 4.62E-07    |
| LINC00982 | HPN      | -0.323061157 | 5.30E-12    |
| LINC00982 | MMP7     | -0.528231602 | 6.47E-33    |
| LINC00982 | RAB27A   | -0.565376989 | 0           |
| LINC00982 | IGF2BP2  | -0.412728039 | 0           |
| LINC00982 | ITGB4    | -0.476490212 | 0           |
| LINC00982 | PPP1R1B  | -0.374443928 | 3.63E-16    |
| LINC00982 | NPDC1    | -0.104531129 | 0.028569174 |
| LINC00982 | CCL13    | -0.521648148 | 5.27E-32    |
| LINC00982 | SPINT1   | -0.682555026 | 0           |
| LINC00982 | HEY2     | -0.260760616 | 3.32E-08    |
| LINC00982 | CST2     | -0.524387916 | 2.21E-32    |
| LINC00982 | ADM      | -0.383536822 | 0           |
| LINC00982 | VSTM2L   | -0.50719866  | 0           |
| LINC00982 | FAM84A   | -0.512791156 | 0           |
| LINC00982 | P4HA2    | -0.560461623 | 0           |
| LINC00982 | LPL      | -0.243339754 | 2.67E-07    |
| LINC00982 | TMEM173  | -0.39186635  | 0           |
| LINC00982 | DHRS3    | -0.304285751 | 9.25E-11    |
| LINC00982 | SCN1B    | -0.478522029 | 0           |
| LINC00982 | GLT1D1   | -0.216610546 | 4.90E-06    |
| LINC00982 | PHYHIP   | -0.418612436 | 0           |
| LINC00982 | BHLHE40  | -0.645918495 | 0           |
| LINC00982 | BID      | -0.442935376 | 0           |
| LINC00982 | POSTN    | -0.4347179   | 0           |
| LINC00982 | ITGA3    | -0.739204776 | 0           |
| LINC00982 | RSP04    | -0.386016561 | 0           |
| LINC00982 | ADAMTS9  | -0.097290202 | 0.041634927 |
| LINC00982 | ABTB2    | -0.62441939  | 0           |
| LINC00982 | KCNQ3    | -0.674596402 | 0           |
| LINC00982 | ANXA1    | -0.42505794  | 0           |
| LINC00982 | S100A11  | -0.522470122 | 0           |
| LINC00982 | CEACAM6  | -0.604722346 | 3.99E-45    |
| LINC00982 | IER5L    | -0.357992381 | 1.31E-14    |
| LINC00982 | KRT80    | -0.666551259 | 0           |
| LINC00982 | CDH6     | -0.550518698 | 0           |
| LINC00982 | UNC5B    | -0.424212591 | 0           |
| LINC00982 | PLEKHN1  | -0.458270949 | 0           |
| LINC00982 | SYTL1    | -0.281078359 | 2.41E-09    |
| LINC00982 | TMEM163  | -0.402892059 | 0           |
| LINC00982 | C4orf48  | -0.018649313 | 0.696671593 |
| LINC00982 | B3GNT7   | -0.340115512 | 3.24E-13    |

|           |            |              |             |
|-----------|------------|--------------|-------------|
| LINC00982 | BAIAP3     | -0.278815064 | 3.26E-09    |
| LINC00982 | PHLDA2     | -0.456850875 | 0           |
| LINC00982 | GAP43      | -0.367721304 | 1.67E-15    |
| LINC00982 | S100A1     | -0.521600802 | 0           |
| LINC00982 | PTPRE      | -0.639762763 | 0           |
| LINC00982 | CCND1      | -0.467374481 | 0           |
| LINC00982 | ST6GALNAC5 | -0.658311697 | 7.19E-56    |
| LINC00982 | KRT17      | -0.236252152 | 5.98E-07    |
| LINC00982 | HPCAL4     | -0.219330415 | 3.70E-06    |
| LINC00982 | GABBR2     | -0.359054173 | 1.06E-14    |
| LINC00982 | DIRAS3     | -0.243375639 | 2.66E-07    |
| LINC00982 | SERINC2    | -0.527026073 | 0           |
| LINC00982 | PTCHD4     | -0.347794433 | 8.54E-14    |
| LINC00982 | EPS8       | -0.445360933 | 0           |
| LINC00982 | LY6E       | -0.420283986 | 0           |
| LINC00982 | UPP1       | -0.498796654 | 0           |
| LINC00982 | AHNAK2     | -0.697481398 | 0           |
| LINC00982 | PLXNC1     | -0.407724166 | 0           |
| LINC00982 | TNC        | -0.591996556 | 0           |
| LINC00982 | DUSP4      | -0.465141539 | 0           |
| LINC00982 | NRCAM      | -0.434414936 | 0           |
| LINC00982 | NRP2       | -0.401948984 | 0           |
| LINC00982 | CTSC       | -0.615315715 | 0           |
| LINC00982 | AMIGO2     | -0.268630875 | 1.23E-08    |
| LINC00982 | NAB2       | -0.304787571 | 8.59E-11    |
| LINC00982 | TBC1D2     | -0.647561962 | 0           |
| LINC00982 | PHLDA3     | -0.454177955 | 0           |
| LINC00982 | PTP4A3     | -0.320563831 | 7.85E-12    |
| LINC00982 | CRABP2     | -0.314718865 | 1.94E-11    |
| LINC00982 | GOS2       | -0.294605508 | 3.73E-10    |
| LINC00982 | S100A6     | -0.556748327 | 0           |
| LINC00982 | FOXQ1      | -0.509137574 | 0           |
| LINC00982 | LRG1       | -0.482005123 | 0           |
| LINC00982 | LAMP5      | -0.284061762 | 1.61E-09    |
| LINC00982 | ALDH3B1    | -0.562118281 | 0           |
| LINC00982 | CDH2       | 0.043106006  | 0.367437442 |
| LINC00982 | SCG5       | -0.118495987 | 0.01301509  |
| LINC00982 | ZCCHC16    | -0.208594474 | 1.05E-05    |
| LINC00982 | GRB7       | -0.49133446  | 0           |
| LINC00982 | TIAM1      | -0.283386191 | 1.77E-09    |
| LINC00982 | FXYD5      | -0.243415211 | 2.65E-07    |
| LINC00982 | CLDN9      | -0.325862441 | 3.40E-12    |
| LINC00982 | FAM43A     | -0.468444926 | 0           |
| LINC00982 | CHST2      | -0.308406261 | 5.03E-11    |
| LINC00982 | HMGA2      | -0.364607948 | 3.51E-15    |
| LINC00982 | GALNT7     | -0.562171186 | 0           |
| LINC00982 | CBLN1      | -0.47255409  | 0           |
| LINC00982 | STRA6      | -0.432858415 | 0           |
| LINC00982 | MUC21      | -0.670941729 | 9.88E-59    |
| LINC00982 | PRR36      | -0.333381227 | 1.00E-12    |
| LINC00982 | NFE2L3     | -0.520434617 | 0           |

|           |          |              |             |
|-----------|----------|--------------|-------------|
| LINC00982 | NR1D1    | -0.405763836 | 0           |
| LINC00982 | MUC1     | -0.625956479 | 0           |
| LINC00982 | NAT8L    | -0.041745079 | 0.382766861 |
| LINC00982 | APOC1    | 0.003820809  | 0.936349996 |
| LINC00982 | EVA1A    | -0.523483406 | 0           |
| LINC00982 | ENTPD1   | -0.239625465 | 4.09E-07    |
| LINC00982 | COL1A1   | -0.417522985 | 0           |
| LINC00982 | FNDC4    | -0.435273334 | 0           |
| LINC00982 | FRMD3    | -0.197588627 | 3.17E-05    |
| LINC00982 | SHROOM4  | -0.454090441 | 0           |
| LINC00982 | NELL2    | -0.171116854 | 0.000322214 |
| LINC00982 | EPHB3    | -0.609114312 | 0           |
| LINC00982 | TMC6     | -0.472984565 | 0           |
| LINC00982 | NOD1     | -0.331600036 | 1.34E-12    |
| LINC00982 | GGCT     | -0.472672098 | 0           |
| LINC00982 | ICAM1    | -0.637051546 | 0           |
| LINC00982 | PRSS23   | -0.49250873  | 0           |
| LINC00982 | CFI      | -0.453872721 | 0           |
| LINC00982 | CD55     | -0.618343654 | 0           |
| LINC00982 | RASD2    | -0.367418876 | 1.93E-15    |
| LINC00982 | KLK11    | -0.293371319 | 3.66E-10    |
| LINC00982 | ICAM5    | -0.272316371 | 7.67E-09    |
| LINC00982 | ADORA1   | -0.548471705 | 0           |
| LINC00982 | ITGA2    | -0.610915644 | 0           |
| LINC00982 | ABCC3    | -0.293240184 | 4.53E-10    |
| LINC00982 | MFGE8    | -0.545931827 | 0           |
| LINC00982 | STK32A   | -0.355576469 | 2.07E-14    |
| LINC00982 | CYSLTR2  | -0.236298675 | 5.94E-07    |
| LINC00982 | LAD1     | -0.629306104 | 0           |
| LINC00982 | MGAT3    | -0.481567556 | 0           |
| LINC00982 | IGFBP6   | -0.292605605 | 4.95E-10    |
| LINC00982 | CYP2S1   | -0.560517365 | 0           |
| LINC00982 | KCNJ2    | -0.429601977 | 0           |
| LINC00982 | FAM20A   | -0.396797885 | 0           |
| LINC00982 | TGFA     | -0.483864324 | 0           |
| LINC00982 | MXRA8    | -0.355400449 | 2.13E-14    |
| LINC00982 | C8orf4   | -0.41862747  | 0           |
| LINC00982 | CLDN10   | -0.459351224 | 2.67E-24    |
| LINC00982 | PDE5A    | -0.576933027 | 0           |
| LINC00982 | APOE     | 0.031633368  | 0.508420205 |
| LINC00982 | SPOCK2   | -0.46522494  | 0           |
| LINC00982 | TENM1    | -0.123174627 | 0.009823829 |
| LINC00982 | SLIT1    | -0.100494586 | 0.035334631 |
| LINC00982 | CXCL14   | -0.14668555  | 0.002079953 |
| LINC00982 | ECM1     | -0.20788345  | 1.18E-05    |
| LINC00982 | DUSP5    | -0.601426882 | 0           |
| LINC00982 | SEZ6L2   | -0.472531821 | 0           |
| LINC00982 | THRSP    | -0.344896558 | 1.42E-13    |
| LINC00982 | C19orf33 | -0.462326356 | 0           |
| LINC00982 | MPZL2    | -0.591134754 | 0           |
| LINC00982 | CTSH     | -0.471687039 | 0           |

|           |           |              |             |
|-----------|-----------|--------------|-------------|
| LINC00982 | CYP1B1    | -0.573026691 | 0           |
| LINC00982 | ALOX5     | -0.635964932 | 0           |
| LINC00982 | SYTL5     | -0.459737632 | 2.42E-24    |
| LINC00982 | TNFRSF12A | -0.346671792 | 1.04E-13    |
| LINC00982 | DUSP6     | -0.409287637 | 0           |
| LINC00982 | ALOX15B   | -0.627291166 | 0           |
| LINC00982 | SDC4      | -0.46191829  | 0           |
| LINC00982 | MDK       | -0.268100687 | 1.32E-08    |
| LINC00982 | KRT19     | -0.599782138 | 0           |
| LINC00982 | MET       | -0.735363685 | 0           |
| LINC00982 | TESC      | -0.107702607 | 0.024064502 |
| LINC00982 | CXCL17    | -0.698876675 | 1.36E-65    |
| LINC00982 | NPC2      | -0.358564977 | 1.17E-14    |
| LINC00982 | COMP      | -0.337770944 | 4.82E-13    |
| LINC00982 | TUSC3     | -0.340701725 | 2.94E-13    |
| LINC00982 | TMPRSS4   | -0.619572389 | 0           |
| LINC00982 | LGALS3    | -0.587793355 | 0           |
| LINC00982 | CRLF1     | -0.252958864 | 8.61E-08    |
| LINC00982 | CTXN1     | -0.328065029 | 2.39E-12    |
| LINC00982 | PCSK1N    | -0.0611701   | 0.200743416 |
| LINC00982 | NMU       | -0.488773235 | 9.65E-28    |
| LINC00982 | GALE      | -0.420335331 | 0           |
| LINC00982 | PCSK2     | -0.156803785 | 0.000991631 |
| LINC00982 | GJB3      | -0.392035703 | 0           |
| LINC00982 | SLPI      | -0.565557548 | 0           |
| LINC00982 | AGR2      | -0.208673908 | 1.09E-05    |
| LINC00982 | MRC2      | -0.37697643  | 1.76E-16    |
| LINC00982 | GOLT1A    | -0.333878224 | 9.24E-13    |
| LINC00982 | SLC27A6   | -0.457685107 | 4.09E-24    |
| LINC00982 | KCNN4     | -0.554248164 | 0           |
| LINC00982 | ETV4      | -0.175383747 | 0.000221726 |
| LINC00982 | SYT12     | -0.514923252 | 0           |
| LINC00982 | PVRL4     | -0.66345467  | 0           |
| LINC00982 | PLCD3     | -0.488377014 | 0           |
| LINC00982 | PLAU      | -0.617909491 | 0           |
| LINC00982 | LRRK2     | -0.235167098 | 6.74E-07    |
| LINC00982 | SFN       | -0.581395365 | 0           |
| LINC00982 | LPAR5     | -0.475931799 | 0           |
| LINC00982 | NGEF      | -0.562352312 | 0           |
| LINC00982 | DTX4      | -0.546865116 | 0           |
| LINC00982 | CST6      | -0.382799269 | 7.26E-18    |
| LINC00982 | QPCT      | -0.390461169 | 0           |
| LINC00982 | TIMP1     | -0.349600161 | 6.18E-14    |
| LINC00982 | CAMK2N1   | -0.425539478 | 0           |
| LINC00982 | KLHDC8A   | -0.154941464 | 0.00114027  |
| LINC00982 | PDLIM4    | -0.50195409  | 0           |
| LINC00982 | SCEL      | -0.633024365 | 0           |
| LINC00982 | LCN2      | -0.705023162 | 0           |
| LINC00982 | PROS1     | -0.742798929 | 0           |
| LINC00982 | GABRB2    | -0.582344114 | 0           |
| LINC00982 | TMPRSS6   | -0.564720567 | 0           |

|             |          |              |             |
|-------------|----------|--------------|-------------|
| LINC00982   | KLK7     | -0.442694565 | 1.71E-22    |
| LINC00982   | PDZK1IP1 | -0.620274625 | 0           |
| LINC00982   | CDH3     | -0.389708298 | 0           |
| LINC00982   | LRP4     | -0.233033726 | 8.54E-07    |
| LINC00982   | IGSF1    | -0.213753663 | 6.56E-06    |
| LINC00982   | B3GNT3   | -0.654394965 | 0           |
| LINC00982   | CLDN1    | -0.600532315 | 0           |
| LINC00982   | GDF15    | -0.631163887 | 0           |
| LINC00982   | ARHGAP36 | -0.22926155  | 1.21E-06    |
| LINC00982   | LAMB3    | -0.566467291 | 0           |
| LINC00982   | KLK10    | -0.438700687 | 0           |
| LINC00982   | DPP4     | -0.674708454 | 0           |
| LINC00982   | METTL7B  | -0.347240133 | 9.42E-14    |
| LINC00982   | LIPH     | -0.648459649 | 0           |
| LINC00982   | CLDN16   | -0.584293665 | 0           |
| LINC00982   | CHI3L1   | -0.651836365 | 0           |
| LINC00982   | SLC22A31 | -0.351732736 | 3.14E-14    |
| LINC00982   | TACSTD2  | -0.587517056 | 0           |
| LINC00982   | SFTPB    | -0.601142782 | 0           |
| LINC00982   | RXRG     | -0.261870633 | 2.90E-08    |
| LINC00982   | DCSTAMP  | -0.635687649 | 4.49E-51    |
| LINC00982   | CITED1   | -0.445092861 | 0           |
| LINC00982   | SERPINA1 | -0.568738245 | 0           |
| LINC00982   | PRR15    | -0.205213082 | 1.53E-05    |
| LINC00982   | SLC34A2  | -0.76313653  | 0           |
| LINC00982   | FN1      | -0.773348519 | 0           |
| LINC00982   | ZCCHC12  | -0.158759719 | 0.000854943 |
| RP1-167F1.2 | TFF3     | 0.588922095  | 0           |
| RP1-167F1.2 | CCL21    | 0.258400821  | 3.97E-08    |
| RP1-167F1.2 | TPO      | 0.559320969  | 0           |
| RP1-167F1.2 | MT1G     | 0.494128368  | 0           |
| RP1-167F1.2 | DIO1     | 0.644950598  | 0           |
| RP1-167F1.2 | DPT      | 0.21217502   | 7.32E-06    |
| RP1-167F1.2 | CDH16    | 0.56398656   | 0           |
| RP1-167F1.2 | CRABP1   | 0.421879528  | 2.26E-20    |
| RP1-167F1.2 | SLC26A7  | 0.591971309  | 0           |
| RP1-167F1.2 | MT1H     | 0.446762489  | 6.32E-23    |
| RP1-167F1.2 | SLC26A4  | 0.519025749  | 0           |
| RP1-167F1.2 | SLC5A8   | 0.562152152  | 6.13E-38    |
| RP1-167F1.2 | PKHD1L1  | 0.634018584  | 9.78E-51    |
| RP1-167F1.2 | TFCP2L1  | 0.561807799  | 0           |
| RP1-167F1.2 | WSCD2    | 0.57615883   | 3.45E-40    |
| RP1-167F1.2 | IPCEF1   | 0.549905536  | 0           |
| RP1-167F1.2 | SLC5A5   | 0.423114586  | 1.70E-20    |
| RP1-167F1.2 | MT1F     | 0.521746753  | 0           |
| RP1-167F1.2 | FOSB     | 0.482276883  | 0           |
| RP1-167F1.2 | SEMA3D   | 0.61673347   | 2.36E-47    |
| RP1-167F1.2 | BMP8A    | 0.599799868  | 0           |
| RP1-167F1.2 | MATN2    | 0.627868585  | 0           |
| RP1-167F1.2 | PLA2R1   | 0.651115691  | 0           |
| RP1-167F1.2 | COL23A1  | 0.470719568  | 0           |

|             |            |             |             |
|-------------|------------|-------------|-------------|
| RP1-167F1.2 | HGD        | 0.537157073 | 0           |
| RP1-167F1.2 | TCEAL2     | 0.451031298 | 0           |
| RP1-167F1.2 | CHRDL1     | 0.332052012 | 9.26E-13    |
| RP1-167F1.2 | TNFRSF11B  | 0.578115807 | 0           |
| RP1-167F1.2 | FAM167A    | 0.560014552 | 0           |
| RP1-167F1.2 | KIT        | 0.604702043 | 0           |
| RP1-167F1.2 | SLC4A4     | 0.603417566 | 0           |
| RP1-167F1.2 | SMOC2      | 0.411483418 | 0           |
| RP1-167F1.2 | FHL1       | 0.66449618  | 0           |
| RP1-167F1.2 | OTOS       | 0.432370496 | 0           |
| RP1-167F1.2 | IGFBPL1    | 0.551136335 | 3.03E-36    |
| RP1-167F1.2 | HBB        | 0.273512767 | 6.57E-09    |
| RP1-167F1.2 | BEX1       | 0.472705146 | 0           |
| RP1-167F1.2 | FABP4      | 0.376368427 | 3.20E-16    |
| RP1-167F1.2 | LMOD1      | 0.545698363 | 0           |
| RP1-167F1.2 | SOD3       | 0.47998054  | 0           |
| RP1-167F1.2 | TMEM171    | 0.514689079 | 0           |
| RP1-167F1.2 | PI16       | 0.29064031  | 6.52E-10    |
| RP1-167F1.2 | ZMAT4      | 0.566071706 | 1.47E-38    |
| RP1-167F1.2 | MFAP4      | 0.2163985   | 5.01E-06    |
| RP1-167F1.2 | CWH43      | 0.526586609 | 1.10E-32    |
| RP1-167F1.2 | SPX        | 0.585135185 | 0           |
| RP1-167F1.2 | APOD       | 0.162267493 | 0.00065253  |
| RP1-167F1.2 | DPP6       | 0.553913854 | 0           |
| RP1-167F1.2 | MMRN1      | 0.393790796 | 0           |
| RP1-167F1.2 | WDR72      | 0.547749328 | 0           |
| RP1-167F1.2 | MPPED2     | 0.63049399  | 0           |
| RP1-167F1.2 | PAPSS2     | 0.410986279 | 0           |
| RP1-167F1.2 | DCN        | 0.09355251  | 0.050157272 |
| RP1-167F1.2 | SORBS2     | 0.650446361 | 0           |
| RP1-167F1.2 | EGR2       | 0.484954484 | 0           |
| RP1-167F1.2 | EDN3       | 0.418238706 | 5.12E-20    |
| RP1-167F1.2 | DIO2       | 0.470827081 | 0           |
| RP1-167F1.2 | ITPR1      | 0.669452963 | 0           |
| RP1-167F1.2 | CFD        | 0.229364967 | 1.28E-06    |
| RP1-167F1.2 | CPXM1      | 0.381365012 | 2.85E-17    |
| RP1-167F1.2 | ELMO1      | 0.556847897 | 0           |
| RP1-167F1.2 | GPC3       | 0.412288429 | 1.92E-19    |
| RP1-167F1.2 | MYOC       | 0.267882255 | 1.19E-08    |
| RP1-167F1.2 | DEPTOR     | 0.622588982 | 0           |
| RP1-167F1.2 | DGKI       | 0.681897611 | 0           |
| RP1-167F1.2 | CARTPT     | 0.437522362 | 5.93E-22    |
| RP1-167F1.2 | IYD        | 0.409324657 | 0           |
| RP1-167F1.2 | LYVE1      | 0.382383119 | 1.25E-17    |
| RP1-167F1.2 | CLCNKB     | 0.60510713  | 0           |
| RP1-167F1.2 | NCAM1      | 0.41124811  | 0           |
| RP1-167F1.2 | HBA2       | 0.253477705 | 8.09E-08    |
| RP1-167F1.2 | GLT8D2     | 0.445526741 | 0           |
| RP1-167F1.2 | OGDHL      | 0.448009741 | 0           |
| RP1-167F1.2 | LIFR       | 0.546504991 | 0           |
| RP1-167F1.2 | CSGALNACT1 | 0.623191222 | 0           |

|             |          |             |             |
|-------------|----------|-------------|-------------|
| RP1-167F1.2 | RAP1GAP  | 0.515588184 | 0           |
| RP1-167F1.2 | COL9A3   | 0.490752077 | 0           |
| RP1-167F1.2 | FBLN1    | 0.138690049 | 0.003620295 |
| RP1-167F1.2 | EFEMP1   | 0.489902756 | 0           |
| RP1-167F1.2 | AOX1     | 0.44206437  | 1.99E-22    |
| RP1-167F1.2 | GRIN2C   | 0.582513184 | 0           |
| RP1-167F1.2 | C11orf74 | 0.481376501 | 0           |
| RP1-167F1.2 | PPARGC1A | 0.511949778 | 0           |
| RP1-167F1.2 | ANGPTL1  | 0.596224721 | 0           |
| RP1-167F1.2 | SCARA5   | 0.25962702  | 3.41E-08    |
| RP1-167F1.2 | LTF      | 0.371185645 | 8.23E-16    |
| RP1-167F1.2 | CA4      | 0.530082071 | 3.56E-33    |
| RP1-167F1.2 | TG       | 0.557253976 | 0           |
| RP1-167F1.2 | FCGBP    | 0.563997481 | 0           |
| RP1-167F1.2 | PBX4     | 0.620956152 | 0           |
| RP1-167F1.2 | CYR61    | 0.486665466 | 0           |
| RP1-167F1.2 | FOS      | 0.538808057 | 0           |
| RP1-167F1.2 | KHDRBS2  | 0.539084356 | 0           |
| RP1-167F1.2 | MUM1L1   | 0.530226627 | 0           |
| RP1-167F1.2 | RGS16    | 0.491904362 | 0           |
| RP1-167F1.2 | MT1M     | 0.401606731 | 0           |
| RP1-167F1.2 | LRP2     | 0.612400253 | 0           |
| RP1-167F1.2 | MAFB     | 0.443000621 | 0           |
| RP1-167F1.2 | KCNK2    | 0.581421463 | 0           |
| RP1-167F1.2 | TBC1D4   | 0.543621301 | 0           |
| RP1-167F1.2 | MIOX     | 0.562675224 | 5.07E-38    |
| RP1-167F1.2 | TPPP     | 0.5306893   | 0           |
| RP1-167F1.2 | FMOD     | 0.512358695 | 0           |
| RP1-167F1.2 | CITED2   | 0.55748049  | 0           |
| RP1-167F1.2 | RGS8     | 0.53733824  | 3.30E-34    |
| RP1-167F1.2 | ABI3BP   | 0.322847267 | 5.48E-12    |
| RP1-167F1.2 | ADH1B    | 0.320805024 | 5.77E-12    |
| RP1-167F1.2 | OGN      | 0.224684109 | 1.98E-06    |
| RP1-167F1.2 | NR4A1    | 0.488944788 | 0           |
| RP1-167F1.2 | FOXJ1    | 0.545250835 | 2.30E-35    |
| RP1-167F1.2 | ALDH1A1  | 0.562057433 | 0           |
| RP1-167F1.2 | OCA2     | 0.634732272 | 7.02E-51    |
| RP1-167F1.2 | TMEM139  | 0.418209476 | 0           |
| RP1-167F1.2 | ARHGAP24 | 0.485947344 | 0           |
| RP1-167F1.2 | SLC25A15 | 0.593433792 | 0           |
| RP1-167F1.2 | DES      | 0.232182428 | 8.73E-07    |
| RP1-167F1.2 | GDF10    | 0.448062865 | 4.58E-23    |
| RP1-167F1.2 | KIAA1324 | 0.467790631 | 0           |
| RP1-167F1.2 | JUN      | 0.528333669 | 0           |
| RP1-167F1.2 | C7       | 0.085078876 | 0.074961386 |
| RP1-167F1.2 | LGI3     | 0.483459947 | 0           |
| RP1-167F1.2 | CDON     | 0.630884893 | 0           |
| RP1-167F1.2 | BCL2     | 0.65782714  | 0           |
| RP1-167F1.2 | HLF      | 0.52873138  | 0           |
| RP1-167F1.2 | EGR1     | 0.54146722  | 0           |
| RP1-167F1.2 | IP6K3    | 0.417094211 | 0           |

|             |          |             |             |
|-------------|----------|-------------|-------------|
| RP1-167F1.2 | SCUBE3   | 0.55234783  | 0           |
| RP1-167F1.2 | PKNOX2   | 0.626849911 | 0           |
| RP1-167F1.2 | SMAD9    | 0.740998306 | 0           |
| RP1-167F1.2 | IQGAP2   | 0.560866426 | 0           |
| RP1-167F1.2 | GNA14    | 0.625784856 | 0           |
| RP1-167F1.2 | LAYN     | 0.532811184 | 0           |
| RP1-167F1.2 | AVPR1A   | 0.494693164 | 0           |
| RP1-167F1.2 | PDLIM3   | 0.423923243 | 0           |
| RP1-167F1.2 | GPM6A    | 0.464494478 | 0           |
| RP1-167F1.2 | SDPR     | 0.461622276 | 0           |
| RP1-167F1.2 | CRYAB    | 0.254087179 | 7.52E-08    |
| RP1-167F1.2 | FOXA2    | 0.510404767 | 1.71E-30    |
| RP1-167F1.2 | C8orf88  | 0.533086631 | 0           |
| RP1-167F1.2 | ISM1     | 0.513229149 | 0           |
| RP1-167F1.2 | BMP2     | 0.48181109  | 0           |
| RP1-167F1.2 | ID4      | 0.82164775  | 0           |
| RP1-167F1.2 | NUPR1    | 0.227372581 | 1.58E-06    |
| RP1-167F1.2 | SERTM1   | 0.44749287  | 5.28E-23    |
| RP1-167F1.2 | IRS1     | 0.576564109 | 0           |
| RP1-167F1.2 | FIBIN    | 0.218624066 | 3.99E-06    |
| RP1-167F1.2 | PODN     | 0.184790237 | 0.000101132 |
| RP1-167F1.2 | TDRD9    | 0.4386909   | 0           |
| RP1-167F1.2 | EPHA3    | 0.354675945 | 2.44E-14    |
| RP1-167F1.2 | AIF1L    | 0.497140989 | 0           |
| RP1-167F1.2 | EBF4     | 0.595866157 | 0           |
| RP1-167F1.2 | ADM2     | 0.470256186 | 0           |
| RP1-167F1.2 | GSTM3    | 0.500089641 | 0           |
| RP1-167F1.2 | HSD17B6  | 0.454409716 | 0           |
| RP1-167F1.2 | AGR3     | 0.448906818 | 3.72E-23    |
| RP1-167F1.2 | EPHB1    | 0.410267448 | 0           |
| RP1-167F1.2 | TMOD1    | 0.364030104 | 3.95E-15    |
| RP1-167F1.2 | WASF3    | 0.649818448 | 0           |
| RP1-167F1.2 | SELV     | 0.574133532 | 7.42E-40    |
| RP1-167F1.2 | ENPP1    | 0.240572511 | 3.67E-07    |
| RP1-167F1.2 | SYNE1    | 0.664733852 | 2.62E-57    |
| RP1-167F1.2 | PLCH1    | 0.579110085 | 0           |
| RP1-167F1.2 | CCDC146  | 0.710075684 | 0           |
| RP1-167F1.2 | SLC16A2  | 0.586323071 | 0           |
| RP1-167F1.2 | IER2     | 0.541087238 | 0           |
| RP1-167F1.2 | KCNAB1   | 0.55234471  | 0           |
| RP1-167F1.2 | SYNDIG1  | 0.495624041 | 0           |
| RP1-167F1.2 | C16orf89 | 0.417919987 | 0           |
| RP1-167F1.2 | CTGF     | 0.392290017 | 0           |
| RP1-167F1.2 | NR4A3    | 0.253073469 | 8.49E-08    |
| RP1-167F1.2 | KIAA1456 | 0.602012527 | 0           |
| RP1-167F1.2 | AQP4     | 0.363385737 | 4.51E-15    |
| RP1-167F1.2 | RNF150   | 0.603808327 | 0           |
| RP1-167F1.2 | C1S      | 0.012871152 | 0.787906919 |
| RP1-167F1.2 | PFKFB2   | 0.45735156  | 0           |
| RP1-167F1.2 | PROX1    | 0.568671156 | 0           |
| RP1-167F1.2 | TCF7L1   | 0.646735051 | 0           |



|             |          |              |             |
|-------------|----------|--------------|-------------|
| RP1-167F1.2 | HSPB6    | 0.284066159  | 1.61E-09    |
| RP1-167F1.2 | FHDC1    | 0.381400613  | 2.79E-17    |
| RP1-167F1.2 | PRR15L   | 0.312634142  | 2.66E-11    |
| RP1-167F1.2 | SLC1A1   | 0.392154137  | 0           |
| RP1-167F1.2 | BTBD11   | 0.596323014  | 0           |
| RP1-167F1.2 | TRIM58   | 0.598393836  | 0           |
| RP1-167F1.2 | LRIG1    | 0.509627337  | 0           |
| RP1-167F1.2 | ROR2     | 0.516588845  | 0           |
| RP1-167F1.2 | GPR125   | 0.655747099  | 0           |
| RP1-167F1.2 | FLRT1    | 0.691067239  | 0           |
| RP1-167F1.2 | PGF      | 0.552550373  | 0           |
| RP1-167F1.2 | DUSP1    | 0.488211491  | 0           |
| RP1-167F1.2 | PLA2G7   | 0.483653412  | 0           |
| RP1-167F1.2 | PLSCR4   | 0.48321003   | 0           |
| RP1-167F1.2 | FAM46B   | 0.315465353  | 1.73E-11    |
| RP1-167F1.2 | GLDC     | 0.511248536  | 0           |
| RP1-167F1.2 | ZBTB16   | 0.448437522  | 0           |
| RP1-167F1.2 | OMD      | 0.139544725  | 0.003391824 |
| RP1-167F1.2 | HSD11B2  | 0.538152061  | 0           |
| RP1-167F1.2 | FGL2     | 0.158672773  | 0.000860629 |
| RP1-167F1.2 | CLCNKA   | 0.615319212  | 4.36E-47    |
| RP1-167F1.2 | GATM     | 0.380930707  | 3.68E-17    |
| RP1-167F1.2 | TNS3     | 0.54274035   | 0           |
| RP1-167F1.2 | TOB1     | 0.577416834  | 0           |
| RP1-167F1.2 | MARC2    | 0.551620489  | 0           |
| RP1-167F1.2 | LRRC2    | 0.541785928  | 0           |
| RP1-167F1.2 | SORD     | 0.429029806  | 0           |
| RP1-167F1.2 | RIMS4    | 0.55263888   | 0           |
| RP1-167F1.2 | SLC29A4  | 0.603781945  | 0           |
| RP1-167F1.2 | SLC39A14 | 0.501059098  | 0           |
| RP1-167F1.2 | FAXDC2   | 0.606881938  | 0           |
| RP1-167F1.2 | HSPB8    | 0.351711832  | 4.22E-14    |
| RP1-167F1.2 | CCL19    | -0.105987459 | 0.02637736  |
| RP1-167F1.2 | KCNIP3   | 0.566431832  | 0           |
| RP1-167F1.2 | CGNL1    | 0.529442694  | 0           |
| RP1-167F1.2 | ATF3     | 0.301720343  | 1.35E-10    |
| RP1-167F1.2 | SGCD     | 0.412415713  | 0           |
| RP1-167F1.2 | STARD13  | 0.666775787  | 0           |
| RP1-167F1.2 | LDHD     | 0.432134904  | 0           |
| RP1-167F1.2 | RCAN1    | 0.497579408  | 0           |
| RP1-167F1.2 | ID3      | 0.64523328   | 0           |
| RP1-167F1.2 | SYTL3    | 0.466884859  | 0           |
| RP1-167F1.2 | MT1E     | 0.295613261  | 3.24E-10    |
| RP1-167F1.2 | CAMK1D   | 0.41103351   | 0           |
| RP1-167F1.2 | PRKCQ    | 0.502249253  | 0           |
| RP1-167F1.2 | NUAK2    | 0.445261363  | 0           |
| RP1-167F1.2 | LIPG     | 0.603040988  | 0           |
| RP1-167F1.2 | SLC25A25 | 0.468144231  | 0           |
| RP1-167F1.2 | PRKX     | 0.426553329  | 0           |
| RP1-167F1.2 | SRPX     | 0.224356272  | 2.19E-06    |
| RP1-167F1.2 | FAM189A1 | 0.523633896  | 0           |

|             |          |              |             |
|-------------|----------|--------------|-------------|
| RP1-167F1.2 | PLEKHH1  | 0.729678994  | 0           |
| RP1-167F1.2 | WNT11    | 0.465308623  | 0           |
| RP1-167F1.2 | SNAI1    | 0.541989039  | 0           |
| RP1-167F1.2 | FDCSP    | -0.096208573 | 0.043933802 |
| RP1-167F1.2 | MT1X     | 0.256851301  | 5.38E-08    |
| RP1-167F1.2 | ACACB    | 0.667326824  | 0           |
| RP1-167F1.2 | ARC      | 0.344962087  | 1.41E-13    |
| RP1-167F1.2 | KLK4     | 0.238462842  | 4.30E-07    |
| RP1-167F1.2 | ZFPM2    | 0.531149987  | 0           |
| RP1-167F1.2 | AKAP12   | 0.503530468  | 0           |
| RP1-167F1.2 | GJB6     | 0.469595434  | 1.84E-25    |
| RP1-167F1.2 | ERO1LB   | 0.658140458  | 0           |
| RP1-167F1.2 | DNALI1   | 0.586700783  | 0           |
| RP1-167F1.2 | HKDC1    | 0.435852455  | 0           |
| RP1-167F1.2 | ZFP36L2  | 0.573701268  | 0           |
| RP1-167F1.2 | CAPSL    | 0.510782454  | 1.52E-30    |
| RP1-167F1.2 | CYP7B1   | 0.544418567  | 0           |
| RP1-167F1.2 | CPQ      | 0.65511337   | 0           |
| RP1-167F1.2 | RPS6KA6  | 0.664552584  | 2.88E-57    |
| RP1-167F1.2 | TLE1     | 0.478933215  | 0           |
| RP1-167F1.2 | TP53INP2 | 0.635268654  | 0           |
| RP1-167F1.2 | KATNAL2  | 0.67032441   | 0           |
| RP1-167F1.2 | SGPP2    | 0.307388012  | 5.85E-11    |
| RP1-167F1.2 | CTH      | 0.542779497  | 0           |
| RP1-167F1.2 | KIF12    | 0.57004953   | 0           |
| RP1-167F1.2 | TMEM220  | 0.553139707  | 0           |
| RP1-167F1.2 | CENPJ    | 0.636669295  | 0           |
| RP1-167F1.2 | FAM155B  | 0.397513879  | 0           |
| RP1-167F1.2 | WFS1     | 0.615526343  | 0           |
| RP1-167F1.2 | SELENBP1 | 0.428652093  | 0           |
| RP1-167F1.2 | SNTA1    | 0.339883041  | 3.37E-13    |
| RP1-167F1.2 | FRAS1    | 0.479735162  | 0           |
| RP1-167F1.2 | FBLN7    | 0.486483205  | 0           |
| RP1-167F1.2 | AGPAT9   | 0.566283754  | 0           |
| RP1-167F1.2 | GPR83    | 0.520857292  | 0           |
| RP1-167F1.2 | PRTG     | 0.650078152  | 0           |
| RP1-167F1.2 | EGR3     | 0.305007844  | 8.32E-11    |
| RP1-167F1.2 | GRAMD2   | 0.638064973  | 0           |
| RP1-167F1.2 | HYOU1    | 0.571872846  | 0           |
| RP1-167F1.2 | FBLN5    | 0.343812355  | 1.72E-13    |
| RP1-167F1.2 | ITM2A    | 0.544597707  | 0           |
| RP1-167F1.2 | SRF      | 0.485372904  | 0           |
| RP1-167F1.2 | FGFR2    | 0.558328676  | 0           |
| RP1-167F1.2 | MT1A     | 0.163862529  | 0.000567187 |
| RP1-167F1.2 | MAMDC2   | 0.394749899  | 0           |
| RP1-167F1.2 | FHL2     | 0.335715724  | 6.81E-13    |
| RP1-167F1.2 | FTCDNL1  | 0.353894706  | 2.83E-14    |
| RP1-167F1.2 | PKIA     | 0.507945291  | 0           |
| RP1-167F1.2 | DNAJB4   | 0.584316359  | 0           |
| RP1-167F1.2 | SLC25A33 | 0.45833279   | 0           |
| RP1-167F1.2 | EYA2     | 0.31593682   | 1.61E-11    |

|             |          |              |             |
|-------------|----------|--------------|-------------|
| RP1-167F1.2 | LPAR1    | 0.240913488  | 3.53E-07    |
| RP1-167F1.2 | STX11    | 0.232788348  | 8.78E-07    |
| RP1-167F1.2 | ARHGEF28 | 0.445363202  | 0           |
| RP1-167F1.2 | OR2W3    | 0.572083332  | 0           |
| RP1-167F1.2 | ALDH1B1  | 0.30858215   | 3.87E-11    |
| RP1-167F1.2 | CXCL12   | 0.155839718  | 0.001066185 |
| RP1-167F1.2 | OLFM2    | 0.519027593  | 0           |
| RP1-167F1.2 | TUB      | 0.615079556  | 0           |
| RP1-167F1.2 | HTRA3    | 0.288918549  | 8.28E-10    |
| RP1-167F1.2 | CKB      | 0.305422434  | 7.82E-11    |
| RP1-167F1.2 | RGS2     | 0.093202881  | 0.051024213 |
| RP1-167F1.2 | SHANK2   | 0.684429262  | 0           |
| RP1-167F1.2 | CNTFR    | 0.410652085  | 2.74E-19    |
| RP1-167F1.2 | CYTH3    | 0.584018218  | 0           |
| RP1-167F1.2 | PLAC9    | 0.307308726  | 5.92E-11    |
| RP1-167F1.2 | WVOX     | 0.600832442  | 0           |
| RP1-167F1.2 | NPR3     | 0.605874185  | 0           |
| RP1-167F1.2 | SDC2     | 0.652760718  | 0           |
| RP1-167F1.2 | KLF15    | 0.490719029  | 0           |
| RP1-167F1.2 | TMEM164  | 0.6395788    | 0           |
| RP1-167F1.2 | LONRF3   | 0.434370967  | 0           |
| RP1-167F1.2 | GBP1     | 0.117966651  | 0.013428318 |
| RP1-167F1.2 | ARHGAP6  | 0.539026629  | 0           |
| RP1-167F1.2 | TMEM119  | 0.091787205  | 0.054663473 |
| RP1-167F1.2 | SH3RF1   | 0.555687527  | 0           |
| RP1-167F1.2 | CRELD2   | 0.477576117  | 0           |
| RP1-167F1.2 | PCP4     | 0.152151527  | 0.001401699 |
| RP1-167F1.2 | GCSH     | 0.601056687  | 0           |
| RP1-167F1.2 | IMPA2    | 0.509315721  | 0           |
| RP1-167F1.2 | C1R      | -0.034556206 | 0.47003104  |
| RP1-167F1.2 | SUCNR1   | 0.347002272  | 9.82E-14    |
| RP1-167F1.2 | SFRP1    | 0.375744574  | 2.54E-16    |
| RP1-167F1.2 | UGT8     | 0.438931881  | 0           |
| RP1-167F1.2 | TLE4     | 0.332070085  | 1.24E-12    |
| RP1-167F1.2 | ANTXR1   | 0.471423931  | 0           |
| RP1-167F1.2 | GPX3     | 0.454763884  | 0           |
| RP1-167F1.2 | DPY19L2  | 0.680340664  | 0           |
| RP1-167F1.2 | FAM46C   | 0.316831954  | 1.40E-11    |
| RP1-167F1.2 | IL33     | 0.282673115  | 1.65E-09    |
| RP1-167F1.2 | PEG3     | 0.668647469  | 0           |
| RP1-167F1.2 | FAHD2A   | 0.572476647  | 0           |
| RP1-167F1.2 | PTGDS    | -0.053409906 | 0.264022214 |
| RP1-167F1.2 | CHCHD10  | 0.219541043  | 3.62E-06    |
| RP1-167F1.2 | CD36     | 0.432221567  | 0           |
| RP1-167F1.2 | ANKRD37  | 0.559447913  | 0           |
| RP1-167F1.2 | TSPAN33  | 0.364538164  | 3.56E-15    |
| RP1-167F1.2 | PRDM16   | 0.679503116  | 0           |
| RP1-167F1.2 | UST      | 0.471377125  | 0           |
| RP1-167F1.2 | NEXN     | 0.490627402  | 0           |
| RP1-167F1.2 | NUPR1L   | 0.291205634  | 4.99E-10    |
| RP1-167F1.2 | SLC24A3  | 0.398883742  | 0           |

|             |          |              |             |
|-------------|----------|--------------|-------------|
| RP1-167F1.2 | MARC1    | 0.593710516  | 0           |
| RP1-167F1.2 | MYH11    | 0.371701507  | 7.28E-16    |
| RP1-167F1.2 | APOA1    | 0.551728092  | 2.47E-36    |
| RP1-167F1.2 | TMEM178B | 0.57632951   | 0           |
| RP1-167F1.2 | CAPN6    | 0.319817853  | 6.75E-12    |
| RP1-167F1.2 | PPM1L    | 0.588764797  | 0           |
| RP1-167F1.2 | FZD8     | 0.635549349  | 0           |
| RP1-167F1.2 | RCAN2    | 0.569162764  | 0           |
| RP1-167F1.2 | COPZ2    | 0.403826624  | 0           |
| RP1-167F1.2 | GAS1     | 0.200766772  | 2.35E-05    |
| RP1-167F1.2 | DACT1    | 0.521431307  | 0           |
| RP1-167F1.2 | WBSCR17  | 0.536418102  | 0           |
| RP1-167F1.2 | NCS1     | 0.524573709  | 0           |
| RP1-167F1.2 | SPIRE2   | 0.504475103  | 0           |
| RP1-167F1.2 | C15orf52 | 0.488835148  | 0           |
| RP1-167F1.2 | SPAG5    | 0.46846762   | 0           |
| RP1-167F1.2 | ARL4D    | 0.357387587  | 1.47E-14    |
| RP1-167F1.2 | FAM189A2 | 0.577013449  | 0           |
| RP1-167F1.2 | MAP1LC3A | 0.475836768  | 0           |
| RP1-167F1.2 | KLF6     | 0.227228332  | 1.61E-06    |
| RP1-167F1.2 | ADD3     | 0.499838448  | 0           |
| RP1-167F1.2 | TSPAN7   | 0.418332591  | 0           |
| RP1-167F1.2 | KLF9     | 0.400909034  | 0           |
| RP1-167F1.2 | KCNQ1    | 0.43498966   | 0           |
| RP1-167F1.2 | MAN1A1   | 0.22589095   | 1.86E-06    |
| RP1-167F1.2 | MLF1     | 0.405159042  | 0           |
| RP1-167F1.2 | RARB     | 0.557004627  | 0           |
| RP1-167F1.2 | CDC42EP2 | 0.307947702  | 5.38E-11    |
| RP1-167F1.2 | FAM3B    | 0.22712082   | 1.63E-06    |
| RP1-167F1.2 | GADD45B  | 0.210576795  | 9.02E-06    |
| RP1-167F1.2 | TMEM47   | 0.522464874  | 0           |
| RP1-167F1.2 | SDF2L1   | 0.380373429  | 4.91E-17    |
| RP1-167F1.2 | CCDC85A  | 0.554358939  | 0           |
| RP1-167F1.2 | CRYBG3   | 0.429965363  | 0           |
| RP1-167F1.2 | FBLN2    | 0.103045101  | 0.030917827 |
| RP1-167F1.2 | PEBP4    | 0.022277365  | 0.641454481 |
| RP1-167F1.2 | CDADC1   | 0.608733054  | 0           |
| RP1-167F1.2 | FAM63A   | 0.512423514  | 0           |
| RP1-167F1.2 | GLUL     | 0.398740344  | 0           |
| RP1-167F1.2 | FREM2    | 0.437528403  | 0           |
| RP1-167F1.2 | ACKR3    | 0.598182925  | 0           |
| RP1-167F1.2 | DENND6A  | 0.638845502  | 0           |
| RP1-167F1.2 | CLDN8    | 0.26981025   | 1.06E-08    |
| RP1-167F1.2 | UTS2R    | 0.435632462  | 9.30E-22    |
| RP1-167F1.2 | SCNN1B   | 0.374283368  | 3.79E-16    |
| RP1-167F1.2 | TTC30A   | 0.597059716  | 0           |
| RP1-167F1.2 | CORO2B   | 0.544448778  | 0           |
| RP1-167F1.2 | TC2N     | 0.381315511  | 2.94E-17    |
| RP1-167F1.2 | ALDH2    | 0.324128907  | 4.48E-12    |
| RP1-167F1.2 | GPR183   | -0.013246737 | 0.781871853 |
| RP1-167F1.2 | C4orf47  | 0.591496722  | 0           |

|             |          |              |             |
|-------------|----------|--------------|-------------|
| RP1-167F1.2 | SLC25A42 | 0.561129534  | 0           |
| RP1-167F1.2 | LGMN     | 0.43765095   | 0           |
| RP1-167F1.2 | ACSF2    | 0.424888161  | 0           |
| RP1-167F1.2 | KIAA1467 | 0.525666564  | 0           |
| RP1-167F1.2 | PRKG1    | 0.543689382  | 0           |
| RP1-167F1.2 | GNAI1    | 0.504436098  | 0           |
| RP1-167F1.2 | ABCC4    | 0.389919777  | 0           |
| RP1-167F1.2 | PRPS1    | 0.477590584  | 0           |
| RP1-167F1.2 | TSPAN5   | 0.476393763  | 0           |
| RP1-167F1.2 | CR2      | 0.015181114  | 0.751098634 |
| RP1-167F1.2 | CCDC170  | 0.602944964  | 0           |
| RP1-167F1.2 | RRAD     | 0.046529529  | 0.33059231  |
| RP1-167F1.2 | SCGB2A1  | 0.290585844  | 6.57E-10    |
| RP1-167F1.2 | SESN3    | 0.384174097  | 0           |
| RP1-167F1.2 | SGK223   | 0.426182     | 0           |
| RP1-167F1.2 | NDRG2    | 0.471727888  | 0           |
| RP1-167F1.2 | C3orf52  | 0.393327414  | 0           |
| RP1-167F1.2 | FLRT3    | -0.202168264 | 2.05E-05    |
| RP1-167F1.2 | MST1R    | -0.333938931 | 9.14E-13    |
| RP1-167F1.2 | SDC1     | -0.458381298 | 0           |
| RP1-167F1.2 | ST8SIA4  | -0.401455391 | 0           |
| RP1-167F1.2 | UBTD1    | -0.409923777 | 0           |
| RP1-167F1.2 | EPHA2    | -0.124545199 | 0.009031227 |
| RP1-167F1.2 | TMEM130  | -0.152293223 | 0.001387194 |
| RP1-167F1.2 | SPINK2   | -0.55044622  | 0           |
| RP1-167F1.2 | MMP16    | -0.290968379 | 6.22E-10    |
| RP1-167F1.2 | SIGLEC15 | -0.392802191 | 0           |
| RP1-167F1.2 | RIN1     | -0.495526315 | 0           |
| RP1-167F1.2 | IL1RN    | -0.526767503 | 0           |
| RP1-167F1.2 | FCER1G   | -0.448571984 | 0           |
| RP1-167F1.2 | CD276    | -0.468525631 | 0           |
| RP1-167F1.2 | CTSB     | -0.525749396 | 0           |
| RP1-167F1.2 | FAM171A2 | -0.076302703 | 0.110358567 |
| RP1-167F1.2 | ASPHD1   | -0.546221601 | 0           |
| RP1-167F1.2 | C15orf48 | -0.508695042 | 0           |
| RP1-167F1.2 | DYSF     | -0.123988772 | 0.009345871 |
| RP1-167F1.2 | PDZRN4   | -0.059237285 | 0.215362284 |
| RP1-167F1.2 | EFHD2    | -0.229989618 | 1.19E-06    |
| RP1-167F1.2 | ASF1B    | -0.45874894  | 0           |
| RP1-167F1.2 | AQP1     | -0.21182099  | 7.97E-06    |
| RP1-167F1.2 | ARRDC2   | -0.326356743 | 3.14E-12    |
| RP1-167F1.2 | PRSS1    | -0.377584191 | 2.53E-16    |
| RP1-167F1.2 | MAPK13   | -0.437363304 | 0           |
| RP1-167F1.2 | CST5     | -0.403850377 | 1.19E-18    |
| RP1-167F1.2 | AHR      | -0.321985465 | 6.28E-12    |
| RP1-167F1.2 | BAX      | -0.433113864 | 0           |
| RP1-167F1.2 | C1orf115 | -0.247210489 | 1.70E-07    |
| RP1-167F1.2 | PLK3     | -0.261903114 | 2.88E-08    |
| RP1-167F1.2 | JAG2     | -0.134757615 | 0.004707475 |
| RP1-167F1.2 | RAD23B   | -0.390795054 | 0           |
| RP1-167F1.2 | CA12     | 0.099343294  | 0.037497918 |

|             |          |              |             |
|-------------|----------|--------------|-------------|
| RP1-167F1.2 | ADTRP    | -0.272539906 | 7.45E-09    |
| RP1-167F1.2 | UCP2     | -0.327636398 | 2.56E-12    |
| RP1-167F1.2 | IGFBP2   | -0.221393011 | 2.99E-06    |
| RP1-167F1.2 | LOXL2    | -0.238759266 | 4.51E-07    |
| RP1-167F1.2 | GPX1     | -0.514603267 | 0           |
| RP1-167F1.2 | P3H3     | -0.440514926 | 0           |
| RP1-167F1.2 | C2orf81  | -0.306701946 | 6.48E-11    |
| RP1-167F1.2 | CDT1     | -0.491799686 | 0           |
| RP1-167F1.2 | SNX25    | -0.094206237 | 0.048569315 |
| RP1-167F1.2 | MTHFD1L  | -0.367898853 | 1.74E-15    |
| RP1-167F1.2 | CDC42BPG | -0.31122025  | 2.58E-11    |
| RP1-167F1.2 | MSN      | -0.444718269 | 0           |
| RP1-167F1.2 | SIGLEC6  | -0.376863132 | 2.91E-16    |
| RP1-167F1.2 | F2R      | 0.004213981  | 0.929816188 |
| RP1-167F1.2 | TMEM184A | -0.358846098 | 1.11E-14    |
| RP1-167F1.2 | CKS2     | -0.346437902 | 1.09E-13    |
| RP1-167F1.2 | TAX1BP3  | -0.524329749 | 0           |
| RP1-167F1.2 | PMEPA1   | -0.428537631 | 0           |
| RP1-167F1.2 | CXCL16   | -0.548490427 | 0           |
| RP1-167F1.2 | FAXC     | -0.33385397  | 9.27E-13    |
| RP1-167F1.2 | VTCN1    | -0.446537585 | 6.68E-23    |
| RP1-167F1.2 | SH2D4A   | -0.394317579 | 0           |
| RP1-167F1.2 | RNF24    | -0.263069582 | 2.49E-08    |
| RP1-167F1.2 | LY6G6C   | -0.379617855 | 1.70E-16    |
| RP1-167F1.2 | NID1     | -0.154954938 | 0.001139125 |
| RP1-167F1.2 | STAC     | -0.511207261 | 0           |
| RP1-167F1.2 | RAB34    | -0.455411654 | 0           |
| RP1-167F1.2 | HES4     | -0.186897937 | 8.40E-05    |
| RP1-167F1.2 | EPHA10   | -0.467178179 | 0           |
| RP1-167F1.2 | ENTPD2   | -0.376636446 | 1.95E-16    |
| RP1-167F1.2 | DDB2     | -0.430029048 | 0           |
| RP1-167F1.2 | NKAIN4   | -0.204431559 | 1.65E-05    |
| RP1-167F1.2 | TRIM29   | -0.259330898 | 3.97E-08    |
| RP1-167F1.2 | ADCY8    | -0.423140308 | 1.69E-20    |
| RP1-167F1.2 | SFTA2    | -0.448555105 | 0           |
| RP1-167F1.2 | NRIP1    | -0.277415841 | 3.93E-09    |
| RP1-167F1.2 | VWA1     | -0.103872863 | 0.029589946 |
| RP1-167F1.2 | APLNR    | -0.166074402 | 0.000483732 |
| RP1-167F1.2 | REN      | -0.48436124  | 3.33E-27    |
| RP1-167F1.2 | EDIL3    | -0.165560384 | 0.000503871 |
| RP1-167F1.2 | AGRN     | -0.142852685 | 0.002722171 |
| RP1-167F1.2 | TREM1    | -0.460355103 | 0           |
| RP1-167F1.2 | SRL      | -0.209914699 | 9.64E-06    |
| RP1-167F1.2 | RASGRF1  | -0.325358919 | 3.68E-12    |
| RP1-167F1.2 | RMI2     | -0.46406769  | 0           |
| RP1-167F1.2 | SAMD1    | -0.449665832 | 0           |
| RP1-167F1.2 | MGAT4B   | -0.423580423 | 0           |
| RP1-167F1.2 | NXN      | -0.375497352 | 2.72E-16    |
| RP1-167F1.2 | SH3BGR13 | -0.634889807 | 0           |
| RP1-167F1.2 | CA11     | -0.392662623 | 0           |
| RP1-167F1.2 | PLD3     | -0.275712093 | 4.92E-09    |

|             |          |              |             |
|-------------|----------|--------------|-------------|
| RP1-167F1.2 | LURAP1L  | -0.48763237  | 0           |
| RP1-167F1.2 | CARNS1   | -0.053272892 | 0.265250721 |
| RP1-167F1.2 | PDLIM7   | -0.357747002 | 1.37E-14    |
| RP1-167F1.2 | BCL2L1   | -0.510479069 | 0           |
| RP1-167F1.2 | GGT6     | -0.312295435 | 2.80E-11    |
| RP1-167F1.2 | DPYSL3   | -0.190610098 | 6.02E-05    |
| RP1-167F1.2 | FYN      | -0.426465958 | 0           |
| RP1-167F1.2 | TK1      | -0.50813365  | 0           |
| RP1-167F1.2 | AK1      | -0.444961378 | 0           |
| RP1-167F1.2 | HIGD1B   | -0.143386276 | 0.002623072 |
| RP1-167F1.2 | TMEM59L  | -0.112688182 | 0.018224209 |
| RP1-167F1.2 | MEGF9    | -0.237801156 | 5.02E-07    |
| RP1-167F1.2 | ZFP36L1  | -0.22204688  | 2.79E-06    |
| RP1-167F1.2 | ADRA1B   | -0.225650252 | 1.90E-06    |
| RP1-167F1.2 | EPHA4    | -0.249792209 | 1.26E-07    |
| RP1-167F1.2 | TCERG1L  | -0.003452316 | 0.942477565 |
| RP1-167F1.2 | NGFR     | -0.233003089 | 8.57E-07    |
| RP1-167F1.2 | EBI3     | -0.57274018  | 0           |
| RP1-167F1.2 | S100A10  | -0.4505204   | 0           |
| RP1-167F1.2 | S100B    | -0.488984645 | 0           |
| RP1-167F1.2 | CD44     | -0.301683039 | 1.35E-10    |
| RP1-167F1.2 | BHLHE41  | -0.253133182 | 8.43E-08    |
| RP1-167F1.2 | FBXO2    | -0.386093437 | 0           |
| RP1-167F1.2 | SLC30A2  | -0.318951285 | 1.01E-11    |
| RP1-167F1.2 | FRMD5    | -0.571390458 | 0           |
| RP1-167F1.2 | SAMD11   | -0.116854223 | 0.014334604 |
| RP1-167F1.2 | SIPA1L2  | -0.203212895 | 1.86E-05    |
| RP1-167F1.2 | S100A16  | -0.500288213 | 0           |
| RP1-167F1.2 | PPL      | -0.346163447 | 1.14E-13    |
| RP1-167F1.2 | ARHGD1B  | -0.263673383 | 2.31E-08    |
| RP1-167F1.2 | CDC42EP3 | -0.457400778 | 0           |
| RP1-167F1.2 | RUNX2    | -0.401633255 | 0           |
| RP1-167F1.2 | LAMC2    | -0.416353254 | 0           |
| RP1-167F1.2 | BRINP1   | -0.454471557 | 0           |
| RP1-167F1.2 | GPRC5B   | -0.357341064 | 1.48E-14    |
| RP1-167F1.2 | AQP5     | -0.044879112 | 0.348046726 |
| RP1-167F1.2 | PLAG1    | -0.193143168 | 4.78E-05    |
| RP1-167F1.2 | PTPRU    | -0.33132544  | 1.41E-12    |
| RP1-167F1.2 | ANGPTL4  | -0.374783627 | 3.32E-16    |
| RP1-167F1.2 | PALM3    | -0.242415969 | 2.97E-07    |
| RP1-167F1.2 | ACP5     | -0.455979995 | 0           |
| RP1-167F1.2 | DLG4     | -0.198548864 | 2.89E-05    |
| RP1-167F1.2 | ETNK2    | -0.397732592 | 0           |
| RP1-167F1.2 | CD109    | -0.271577399 | 8.44E-09    |
| RP1-167F1.2 | SNX22    | -0.243115651 | 2.74E-07    |
| RP1-167F1.2 | TMEM98   | -0.289899352 | 7.22E-10    |
| RP1-167F1.2 | CTHRC1   | -0.317436606 | 1.28E-11    |
| RP1-167F1.2 | S100A2   | -0.448499363 | 0           |
| RP1-167F1.2 | C11orf80 | -0.564844816 | 0           |
| RP1-167F1.2 | SREBF1   | -0.300644508 | 1.57E-10    |
| RP1-167F1.2 | PRSS22   | -0.381162752 | 3.23E-17    |

|             |          |              |             |
|-------------|----------|--------------|-------------|
| RP1-167F1.2 | CMTM3    | -0.506118286 | 0           |
| RP1-167F1.2 | RDH5     | -0.357905576 | 1.33E-14    |
| RP1-167F1.2 | MYH10    | -0.301338659 | 1.42E-10    |
| RP1-167F1.2 | EVPL     | -0.308683837 | 4.82E-11    |
| RP1-167F1.2 | SCD      | -0.427393573 | 0           |
| RP1-167F1.2 | CD151    | -0.388211207 | 0           |
| RP1-167F1.2 | S100A4   | -0.484253384 | 0           |
| RP1-167F1.2 | BNIP1    | -0.298119665 | 2.26E-10    |
| RP1-167F1.2 | MAP3K6   | -0.469849114 | 0           |
| RP1-167F1.2 | MANEAL   | -0.466478354 | 0           |
| RP1-167F1.2 | CD207    | -0.439417701 | 3.77E-22    |
| RP1-167F1.2 | CD1A     | -0.46428923  | 7.45E-25    |
| RP1-167F1.2 | C3       | -0.391071636 | 0           |
| RP1-167F1.2 | NT5E     | -0.287280046 | 1.04E-09    |
| RP1-167F1.2 | CACNG4   | -0.339902998 | 2.47E-13    |
| RP1-167F1.2 | FHOD1    | -0.329488932 | 1.90E-12    |
| RP1-167F1.2 | LEMD1    | -0.507518786 | 0           |
| RP1-167F1.2 | ATP11A   | -0.068979652 | 0.149003352 |
| RP1-167F1.2 | PPAP2C   | -0.29388838  | 4.13E-10    |
| RP1-167F1.2 | DRAM1    | -0.384651804 | 0           |
| RP1-167F1.2 | CDA      | -0.236459376 | 5.84E-07    |
| RP1-167F1.2 | CCND2    | -0.253751308 | 7.83E-08    |
| RP1-167F1.2 | LCN6     | -0.122213472 | 0.010378103 |
| RP1-167F1.2 | CDH4     | -0.348595387 | 7.40E-14    |
| RP1-167F1.2 | MMP11    | -0.493087142 | 0           |
| RP1-167F1.2 | B3GAT1   | -0.116288434 | 0.014815867 |
| RP1-167F1.2 | SPP1     | -0.347963219 | 8.29E-14    |
| RP1-167F1.2 | HLA-DQB1 | -0.498840481 | 0           |
| RP1-167F1.2 | SDC3     | -0.370259165 | 1.02E-15    |
| RP1-167F1.2 | CX3CL1   | -0.368031896 | 1.69E-15    |
| RP1-167F1.2 | SDK1     | -0.25538201  | 6.43E-08    |
| RP1-167F1.2 | DOCK9    | -0.271054304 | 9.03E-09    |
| RP1-167F1.2 | CSF2     | -0.538023123 | 2.63E-34    |
| RP1-167F1.2 | GRHL3    | -0.460643175 | 0           |
| RP1-167F1.2 | TMEM92   | -0.551918715 | 2.31E-36    |
| RP1-167F1.2 | BASP1    | -0.4488002   | 0           |
| RP1-167F1.2 | HRH1     | -0.345136547 | 1.36E-13    |
| RP1-167F1.2 | ESM1     | 0.064927791  | 0.174414497 |
| RP1-167F1.2 | B4GALNT3 | -0.358700715 | 1.14E-14    |
| RP1-167F1.2 | LMO3     | -0.222640752 | 2.62E-06    |
| RP1-167F1.2 | C9orf16  | -0.549443431 | 0           |
| RP1-167F1.2 | SEMA3F   | -0.11499105  | 0.015973387 |
| RP1-167F1.2 | PLA2G12B | -0.361610235 | 5.23E-15    |
| RP1-167F1.2 | KLK6     | -0.304935124 | 6.71E-11    |
| RP1-167F1.2 | ST3GAL5  | -0.289378668 | 7.77E-10    |
| RP1-167F1.2 | FAM132B  | -0.144097873 | 0.002496031 |
| RP1-167F1.2 | CDKN1A   | -0.186185205 | 8.94E-05    |
| RP1-167F1.2 | E2F1     | -0.499332798 | 0           |
| RP1-167F1.2 | B3GNT8   | -0.436283215 | 0           |
| RP1-167F1.2 | MTMR11   | -0.387746407 | 0           |
| RP1-167F1.2 | MYO1G    | -0.399432226 | 0           |



|             |          |              |             |
|-------------|----------|--------------|-------------|
| RP1-167F1.2 | TMSB10   | -0.581477915 | 0           |
| RP1-167F1.2 | UNC5CL   | -0.479837426 | 0           |
| RP1-167F1.2 | ABR      | -0.419431261 | 0           |
| RP1-167F1.2 | PLP2     | -0.611329383 | 0           |
| RP1-167F1.2 | SRCIN1   | -0.413566012 | 0           |
| RP1-167F1.2 | PDE9A    | -0.530179963 | 0           |
| RP1-167F1.2 | TREM2    | -0.450710462 | 0           |
| RP1-167F1.2 | KDELR3   | -0.366096671 | 2.57E-15    |
| RP1-167F1.2 | PC       | -0.412683927 | 0           |
| RP1-167F1.2 | C2CD4A   | -0.557263905 | 0           |
| RP1-167F1.2 | PELI1    | -0.340531662 | 3.02E-13    |
| RP1-167F1.2 | SSX1     | -0.183397255 | 0.000114242 |
| RP1-167F1.2 | MROH6    | -0.519744863 | 0           |
| RP1-167F1.2 | ESPN     | -0.441012065 | 0           |
| RP1-167F1.2 | BMP1     | -0.30447638  | 8.99E-11    |
| RP1-167F1.2 | TM4SF4   | -0.31768533  | 9.45E-12    |
| RP1-167F1.2 | CORO2A   | -0.396539316 | 0           |
| RP1-167F1.2 | CD164L2  | -0.517129476 | 2.17E-31    |
| RP1-167F1.2 | CTSS     | -0.444970313 | 0           |
| RP1-167F1.2 | CLU      | -0.357364751 | 1.47E-14    |
| RP1-167F1.2 | TMSB4X   | -0.538518142 | 0           |
| RP1-167F1.2 | WNT10A   | -0.349782789 | 4.43E-14    |
| RP1-167F1.2 | NAPSA    | -0.329365818 | 1.93E-12    |
| RP1-167F1.2 | PLEKHA4  | -0.36730257  | 1.98E-15    |
| RP1-167F1.2 | SFTPA1   | -0.124775644 | 0.008867481 |
| RP1-167F1.2 | C1orf116 | -0.412025661 | 0           |
| RP1-167F1.2 | TM4SF1   | -0.353646774 | 2.96E-14    |
| RP1-167F1.2 | SEL1L3   | -0.282400565 | 2.02E-09    |
| RP1-167F1.2 | VASN     | -0.42756633  | 0           |
| RP1-167F1.2 | NPTXR    | -0.535179013 | 0           |
| RP1-167F1.2 | PDE4C    | -0.385565944 | 0           |
| RP1-167F1.2 | CDC42EP1 | -0.432995146 | 0           |
| RP1-167F1.2 | ENDOD1   | -0.490503295 | 0           |
| RP1-167F1.2 | RYR1     | -0.373760414 | 4.35E-16    |
| RP1-167F1.2 | IL1RAP   | -0.298888422 | 2.03E-10    |
| RP1-167F1.2 | SLC35F2  | -0.372319008 | 6.99E-16    |
| RP1-167F1.2 | ISYNA1   | -0.307730124 | 5.56E-11    |
| RP1-167F1.2 | HLA-G    | -0.440037218 | 0           |
| RP1-167F1.2 | CDKN2B   | -0.40432504  | 0           |
| RP1-167F1.2 | ALDH1A3  | -0.294373747 | 3.86E-10    |
| RP1-167F1.2 | CLIP3    | -0.300663372 | 1.57E-10    |
| RP1-167F1.2 | ULBP2    | -0.367583407 | 1.86E-15    |
| RP1-167F1.2 | ETHE1    | -0.583324067 | 0           |
| RP1-167F1.2 | XPR1     | -0.300219422 | 1.67E-10    |
| RP1-167F1.2 | SPTBN2   | -0.521815118 | 0           |
| RP1-167F1.2 | IVL      | -0.537402734 | 3.23E-34    |
| RP1-167F1.2 | MARCO    | -0.472991657 | 0           |
| RP1-167F1.2 | PLXND1   | -0.200373599 | 2.44E-05    |
| RP1-167F1.2 | EMILIN2  | -0.43849715  | 0           |
| RP1-167F1.2 | PLAUR    | -0.499864404 | 0           |
| RP1-167F1.2 | CDC42EP5 | -0.458467393 | 0           |

|             |          |              |             |
|-------------|----------|--------------|-------------|
| RP1-167F1.2 | TRPC5    | -0.212789177 | 6.88E-06    |
| RP1-167F1.2 | TMEM100  | -0.343854764 | 1.71E-13    |
| RP1-167F1.2 | QSOX1    | -0.413016677 | 0           |
| RP1-167F1.2 | ARHGAP23 | -0.258695183 | 4.29E-08    |
| RP1-167F1.2 | MDF1     | -0.216209573 | 5.11E-06    |
| RP1-167F1.2 | FSTL3    | -0.368261814 | 1.61E-15    |
| RP1-167F1.2 | INF2     | -0.435181991 | 0           |
| RP1-167F1.2 | TGFBR1   | -0.459314444 | 0           |
| RP1-167F1.2 | TGFBI    | -0.34090441  | 2.84E-13    |
| RP1-167F1.2 | ERBB3    | -0.500986619 | 0           |
| RP1-167F1.2 | CCL18    | -0.311953041 | 2.95E-11    |
| RP1-167F1.2 | CCL17    | -0.463680562 | 8.72E-25    |
| RP1-167F1.2 | C16orf45 | -0.209468338 | 1.01E-05    |
| RP1-167F1.2 | PRDM1    | -0.219737346 | 3.55E-06    |
| RP1-167F1.2 | TRIM47   | -0.585199579 | 0           |
| RP1-167F1.2 | CNFN     | -0.457310002 | 0           |
| RP1-167F1.2 | ARMCX3   | -0.261842833 | 2.91E-08    |
| RP1-167F1.2 | RAMP1    | -0.341462681 | 2.58E-13    |
| RP1-167F1.2 | GABRD    | -0.042039533 | 0.379417431 |
| RP1-167F1.2 | COL13A1  | -0.231802012 | 9.78E-07    |
| RP1-167F1.2 | S100A5   | -0.442732833 | 0           |
| RP1-167F1.2 | MISP     | -0.385982662 | 0           |
| RP1-167F1.2 | HES6     | -0.249237625 | 1.34E-07    |
| RP1-167F1.2 | PSD3     | -0.35362791  | 2.97E-14    |
| RP1-167F1.2 | DOK7     | -0.306236437 | 6.94E-11    |
| RP1-167F1.2 | ZMAT3    | -0.319490549 | 9.28E-12    |
| RP1-167F1.2 | MFAP2    | -0.335347373 | 7.24E-13    |
| RP1-167F1.2 | TMEM79   | -0.52101388  | 0           |
| RP1-167F1.2 | SLC1A5   | -0.470609786 | 0           |
| RP1-167F1.2 | BBC3     | -0.368658533 | 1.47E-15    |
| RP1-167F1.2 | HLA-DQB2 | -0.527349036 | 0           |
| RP1-167F1.2 | C1QL1    | -0.271859088 | 8.14E-09    |
| RP1-167F1.2 | TMEM215  | -0.108367236 | 0.023161325 |
| RP1-167F1.2 | PNP      | -0.412545211 | 0           |
| RP1-167F1.2 | ARNTL    | -0.258564977 | 4.36E-08    |
| RP1-167F1.2 | CLDN2    | -0.381865427 | 1.09E-16    |
| RP1-167F1.2 | MVP      | -0.632923802 | 0           |
| RP1-167F1.2 | LGALS1   | -0.504354258 | 0           |
| RP1-167F1.2 | BIRC7    | -0.407396386 | 5.55E-19    |
| RP1-167F1.2 | COL8A1   | -0.430337402 | 0           |
| RP1-167F1.2 | PERP     | -0.483360944 | 0           |
| RP1-167F1.2 | GJA4     | -0.108039754 | 0.023623866 |
| RP1-167F1.2 | IGFL2    | -0.444976097 | 9.79E-23    |
| RP1-167F1.2 | DAPK2    | -0.309351748 | 4.36E-11    |
| RP1-167F1.2 | MAMLD1   | -0.385698988 | 0           |
| RP1-167F1.2 | ETV5     | -0.231686415 | 9.91E-07    |
| RP1-167F1.2 | RUNX1    | -0.485511053 | 0           |
| RP1-167F1.2 | LONRF2   | -0.097218716 | 0.041785654 |
| RP1-167F1.2 | SPOCK1   | -0.041927482 | 0.380689897 |
| RP1-167F1.2 | XKRX     | -0.298422346 | 2.17E-10    |
| RP1-167F1.2 | TGFBI    | -0.268374433 | 1.27E-08    |

|             |           |              |             |
|-------------|-----------|--------------|-------------|
| RP1-167F1.2 | ERP27     | -0.154883027 | 0.00114525  |
| RP1-167F1.2 | TNFRSF10C | -0.293513221 | 4.36E-10    |
| RP1-167F1.2 | PALM      | -0.371524778 | 7.59E-16    |
| RP1-167F1.2 | TSC22D1   | -0.223114914 | 2.49E-06    |
| RP1-167F1.2 | TGM2      | -0.449330671 | 0           |
| RP1-167F1.2 | UBE2QL1   | -0.258085142 | 4.62E-08    |
| RP1-167F1.2 | ECE1      | -0.375952365 | 2.39E-16    |
| RP1-167F1.2 | COL8A2    | -0.376447519 | 2.06E-16    |
| RP1-167F1.2 | HIST3H2A  | -0.393203448 | 0           |
| RP1-167F1.2 | TNFRSF21  | -0.373614889 | 4.52E-16    |
| RP1-167F1.2 | SOX4      | -0.346907667 | 9.99E-14    |
| RP1-167F1.2 | ELF3      | -0.473012933 | 0           |
| RP1-167F1.2 | TPD52L1   | -0.404125333 | 0           |
| RP1-167F1.2 | INHBB     | -0.268837531 | 1.20E-08    |
| RP1-167F1.2 | HPN       | -0.382103416 | 1.65E-17    |
| RP1-167F1.2 | MMP7      | -0.417014334 | 6.73E-20    |
| RP1-167F1.2 | RAB27A    | -0.397453456 | 0           |
| RP1-167F1.2 | IGF2BP2   | -0.342806304 | 2.04E-13    |
| RP1-167F1.2 | ITGB4     | -0.392107615 | 0           |
| RP1-167F1.2 | PPP1R1B   | -0.406336858 | 0           |
| RP1-167F1.2 | NPDC1     | -0.314779855 | 1.92E-11    |
| RP1-167F1.2 | CCL13     | -0.511611962 | 1.18E-30    |
| RP1-167F1.2 | SPINT1    | -0.618923059 | 0           |
| RP1-167F1.2 | HEY2      | -0.282686367 | 1.94E-09    |
| RP1-167F1.2 | CST2      | -0.386905753 | 3.98E-17    |
| RP1-167F1.2 | ADM       | -0.354248022 | 2.65E-14    |
| RP1-167F1.2 | VSTM2L    | -0.433384915 | 0           |
| RP1-167F1.2 | FAM84A    | -0.374472295 | 3.61E-16    |
| RP1-167F1.2 | P4HA2     | -0.506899809 | 0           |
| RP1-167F1.2 | LPL       | -0.1638955   | 0.000574576 |
| RP1-167F1.2 | TMEM173   | -0.413445876 | 0           |
| RP1-167F1.2 | DHRS3     | -0.413739905 | 0           |
| RP1-167F1.2 | SCN1B     | -0.540568965 | 0           |
| RP1-167F1.2 | GLT1D1    | -0.213747848 | 6.56E-06    |
| RP1-167F1.2 | PHYHIP    | -0.505810358 | 0           |
| RP1-167F1.2 | BHLHE40   | -0.41248805  | 0           |
| RP1-167F1.2 | BID       | -0.517768505 | 0           |
| RP1-167F1.2 | POSTN     | -0.333184073 | 1.04E-12    |
| RP1-167F1.2 | ITGA3     | -0.551127747 | 0           |
| RP1-167F1.2 | RSP04     | -0.293320889 | 4.48E-10    |
| RP1-167F1.2 | ADAMTS9   | -0.16174298  | 0.000679665 |
| RP1-167F1.2 | ABTB2     | -0.405979002 | 0           |
| RP1-167F1.2 | KCNQ3     | -0.387712933 | 0           |
| RP1-167F1.2 | ANXA1     | -0.36249656  | 5.40E-15    |
| RP1-167F1.2 | S100A11   | -0.612284372 | 0           |
| RP1-167F1.2 | CEACAM6   | -0.438522561 | 4.67E-22    |
| RP1-167F1.2 | IER5L     | -0.421310603 | 0           |
| RP1-167F1.2 | KRT80     | -0.413501618 | 0           |
| RP1-167F1.2 | CDH6      | -0.391098585 | 0           |
| RP1-167F1.2 | UNC5B     | -0.297696139 | 2.40E-10    |
| RP1-167F1.2 | PLEKHN1   | -0.403915698 | 0           |

|             |            |              |             |
|-------------|------------|--------------|-------------|
| RP1-167F1.2 | SYTL1      | -0.370694037 | 9.24E-16    |
| RP1-167F1.2 | TMEM163    | -0.312052043 | 2.91E-11    |
| RP1-167F1.2 | C4orf48    | -0.237133528 | 5.41E-07    |
| RP1-167F1.2 | B3GNT7     | -0.371448185 | 7.73E-16    |
| RP1-167F1.2 | BAIAP3     | -0.370478587 | 9.72E-16    |
| RP1-167F1.2 | PHLDA2     | -0.507708139 | 0           |
| RP1-167F1.2 | GAP43      | -0.377872245 | 2.39E-16    |
| RP1-167F1.2 | S100A1     | -0.489467742 | 0           |
| RP1-167F1.2 | PTPRE      | -0.399626401 | 0           |
| RP1-167F1.2 | CCND1      | -0.298696659 | 2.08E-10    |
| RP1-167F1.2 | ST6GALNAC5 | -0.42421431  | 1.33E-20    |
| RP1-167F1.2 | KRT17      | -0.233061101 | 8.52E-07    |
| RP1-167F1.2 | HPCAL4     | -0.313794938 | 2.23E-11    |
| RP1-167F1.2 | GABBR2     | -0.366701748 | 2.25E-15    |
| RP1-167F1.2 | DIRAS3     | -0.284337918 | 1.55E-09    |
| RP1-167F1.2 | SERINC2    | -0.494684937 | 0           |
| RP1-167F1.2 | PTCHD4     | -0.179734169 | 0.000156755 |
| RP1-167F1.2 | EPS8       | -0.272656922 | 7.34E-09    |
| RP1-167F1.2 | LY6E       | -0.525574369 | 0           |
| RP1-167F1.2 | UPP1       | -0.466264889 | 0           |
| RP1-167F1.2 | AHNAK2     | -0.466066601 | 0           |
| RP1-167F1.2 | PLXNC1     | -0.439870701 | 0           |
| RP1-167F1.2 | TNC        | -0.414973037 | 0           |
| RP1-167F1.2 | DUSP4      | -0.419146736 | 0           |
| RP1-167F1.2 | NRCAM      | -0.284167714 | 1.59E-09    |
| RP1-167F1.2 | NRP2       | -0.413369994 | 0           |
| RP1-167F1.2 | CTSC       | -0.554862461 | 0           |
| RP1-167F1.2 | AMIGO2     | -0.263540624 | 2.35E-08    |
| RP1-167F1.2 | NAB2       | -0.348318379 | 7.78E-14    |
| RP1-167F1.2 | TBC1D2     | -0.461082444 | 0           |
| RP1-167F1.2 | PHLDA3     | -0.464212506 | 0           |
| RP1-167F1.2 | PTP4A3     | -0.405771778 | 0           |
| RP1-167F1.2 | CRABP2     | -0.504297523 | 0           |
| RP1-167F1.2 | GOS2       | -0.398515391 | 0           |
| RP1-167F1.2 | S100A6     | -0.584602303 | 0           |
| RP1-167F1.2 | FOXQ1      | -0.321189049 | 7.12E-12    |
| RP1-167F1.2 | LRG1       | -0.441279711 | 0           |
| RP1-167F1.2 | LAMP5      | -0.307424181 | 5.82E-11    |
| RP1-167F1.2 | ALDH3B1    | -0.457207312 | 0           |
| RP1-167F1.2 | CDH2       | 0.038091638  | 0.425811826 |
| RP1-167F1.2 | SCG5       | -0.232818134 | 8.75E-07    |
| RP1-167F1.2 | ZCCHC16    | -0.270784109 | 8.14E-09    |
| RP1-167F1.2 | GRB7       | -0.436829146 | 0           |
| RP1-167F1.2 | TIAM1      | -0.169422609 | 0.000369811 |
| RP1-167F1.2 | FXD5       | -0.51366076  | 0           |
| RP1-167F1.2 | CLDN9      | -0.42401175  | 0           |
| RP1-167F1.2 | FAM43A     | -0.447335164 | 0           |
| RP1-167F1.2 | CHST2      | -0.328322606 | 2.29E-12    |
| RP1-167F1.2 | HMGA2      | -0.422365446 | 0           |
| RP1-167F1.2 | GALNT7     | -0.379830334 | 6.28E-17    |
| RP1-167F1.2 | CBLN1      | -0.385851037 | 0           |

|             |         |              |             |
|-------------|---------|--------------|-------------|
| RP1-167F1.2 | STRA6   | -0.390034665 | 0           |
| RP1-167F1.2 | MUC21   | -0.531421262 | 2.31E-33    |
| RP1-167F1.2 | PRR36   | -0.411246266 | 0           |
| RP1-167F1.2 | NFE2L3  | -0.395997072 | 0           |
| RP1-167F1.2 | NR1D1   | -0.373326676 | 4.86E-16    |
| RP1-167F1.2 | MUC1    | -0.535367231 | 0           |
| RP1-167F1.2 | NAT8L   | -0.176836294 | 0.000200475 |
| RP1-167F1.2 | APOC1   | -0.247238715 | 1.70E-07    |
| RP1-167F1.2 | EVA1A   | -0.413812809 | 0           |
| RP1-167F1.2 | ENTPD1  | -0.156198566 | 0.00103785  |
| RP1-167F1.2 | COL1A1  | -0.409155729 | 0           |
| RP1-167F1.2 | FNDC4   | -0.419565865 | 0           |
| RP1-167F1.2 | FRMD3   | -0.163498782 | 0.000592732 |
| RP1-167F1.2 | SHROOM4 | -0.328764428 | 2.13E-12    |
| RP1-167F1.2 | NELL2   | -0.190928239 | 5.85E-05    |
| RP1-167F1.2 | EPHB3   | -0.499257057 | 0           |
| RP1-167F1.2 | TMC6    | -0.500934139 | 0           |
| RP1-167F1.2 | NOD1    | -0.327348185 | 2.68E-12    |
| RP1-167F1.2 | GGCT    | -0.559794705 | 0           |
| RP1-167F1.2 | ICAM1   | -0.47740648  | 0           |
| RP1-167F1.2 | PRSS23  | -0.380338679 | 4.99E-17    |
| RP1-167F1.2 | CFI     | -0.353528199 | 3.02E-14    |
| RP1-167F1.2 | CD55    | -0.410453822 | 0           |
| RP1-167F1.2 | RASD2   | -0.284839171 | 1.45E-09    |
| RP1-167F1.2 | KLK11   | -0.283405444 | 1.49E-09    |
| RP1-167F1.2 | ICAM5   | -0.240624991 | 3.65E-07    |
| RP1-167F1.2 | ADORA1  | -0.561627808 | 0           |
| RP1-167F1.2 | ITGA2   | -0.392579507 | 0           |
| RP1-167F1.2 | ABCC3   | -0.239953392 | 3.94E-07    |
| RP1-167F1.2 | MFGE8   | -0.45626835  | 0           |
| RP1-167F1.2 | STK32A  | -0.225125739 | 2.01E-06    |
| RP1-167F1.2 | CYSLTR2 | -0.152691218 | 0.001347186 |
| RP1-167F1.2 | LAD1    | -0.592820772 | 0           |
| RP1-167F1.2 | MGAT3   | -0.300838825 | 1.53E-10    |
| RP1-167F1.2 | IGFBP6  | -0.420084989 | 0           |
| RP1-167F1.2 | CYP2S1  | -0.466491403 | 0           |
| RP1-167F1.2 | KCNJ2   | -0.401811118 | 0           |
| RP1-167F1.2 | FAM20A  | -0.372700182 | 5.70E-16    |
| RP1-167F1.2 | TGFA    | -0.395952536 | 0           |
| RP1-167F1.2 | MXRA8   | -0.432672609 | 0           |
| RP1-167F1.2 | C8orf4  | -0.302440024 | 1.21E-10    |
| RP1-167F1.2 | CLDN10  | -0.459170095 | 2.80E-24    |
| RP1-167F1.2 | PDE5A   | -0.394568914 | 0           |
| RP1-167F1.2 | APOE    | -0.210173268 | 9.39E-06    |
| RP1-167F1.2 | SPOCK2  | -0.336186482 | 6.29E-13    |
| RP1-167F1.2 | TENM1   | -0.160261916 | 0.000762034 |
| RP1-167F1.2 | SLIT1   | -0.214145417 | 6.30E-06    |
| RP1-167F1.2 | CXCL14  | -0.153976404 | 0.001225133 |
| RP1-167F1.2 | ECM1    | -0.262549891 | 2.66E-08    |
| RP1-167F1.2 | DUSP5   | -0.446862846 | 0           |
| RP1-167F1.2 | SEZ6L2  | -0.459105518 | 0           |

|             |           |              |             |
|-------------|-----------|--------------|-------------|
| RP1-167F1.2 | THRSP     | -0.306541103 | 6.63E-11    |
| RP1-167F1.2 | C19orf33  | -0.45612552  | 0           |
| RP1-167F1.2 | MPZL2     | -0.432037604 | 0           |
| RP1-167F1.2 | CTSH      | -0.532116607 | 0           |
| RP1-167F1.2 | CYP1B1    | -0.506188354 | 0           |
| RP1-167F1.2 | ALOX5     | -0.490799593 | 0           |
| RP1-167F1.2 | SYTL5     | -0.335960831 | 4.82E-13    |
| RP1-167F1.2 | TNFRSF12A | -0.366807984 | 2.20E-15    |
| RP1-167F1.2 | DUSP6     | -0.26436413  | 2.12E-08    |
| RP1-167F1.2 | ALOX15B   | -0.537856188 | 0           |
| RP1-167F1.2 | SDC4      | -0.43812497  | 0           |
| RP1-167F1.2 | MDK       | -0.393907386 | 0           |
| RP1-167F1.2 | KRT19     | -0.533651852 | 0           |
| RP1-167F1.2 | MET       | -0.496219615 | 0           |
| RP1-167F1.2 | TESC      | -0.257273692 | 5.11E-08    |
| RP1-167F1.2 | CXCL17    | -0.626816672 | 2.66E-49    |
| RP1-167F1.2 | NPC2      | -0.55737468  | 0           |
| RP1-167F1.2 | COMP      | -0.362659248 | 5.22E-15    |
| RP1-167F1.2 | TUSC3     | -0.247642383 | 1.62E-07    |
| RP1-167F1.2 | TMPRSS4   | -0.456157575 | 0           |
| RP1-167F1.2 | LGALS3    | -0.542518942 | 0           |
| RP1-167F1.2 | CRLF1     | -0.16143264  | 0.000696208 |
| RP1-167F1.2 | CTXN1     | -0.361552634 | 6.52E-15    |
| RP1-167F1.2 | PCSK1N    | -0.113933796 | 0.016974558 |
| RP1-167F1.2 | NMU       | -0.475898677 | 3.40E-26    |
| RP1-167F1.2 | GALE      | -0.537931646 | 0           |
| RP1-167F1.2 | PCSK2     | -0.172410692 | 0.000289786 |
| RP1-167F1.2 | GJB3      | -0.461618305 | 0           |
| RP1-167F1.2 | SLPI      | -0.443475776 | 0           |
| RP1-167F1.2 | AGR2      | -0.150217011 | 0.001614195 |
| RP1-167F1.2 | MRC2      | -0.307312981 | 5.91E-11    |
| RP1-167F1.2 | GOLT1A    | -0.504315537 | 0           |
| RP1-167F1.2 | SLC27A6   | -0.274602724 | 4.92E-09    |
| RP1-167F1.2 | KCNN4     | -0.548770839 | 0           |
| RP1-167F1.2 | ETV4      | -0.246491455 | 1.69E-07    |
| RP1-167F1.2 | SYT12     | -0.513624733 | 0           |
| RP1-167F1.2 | PVRL4     | -0.598524752 | 0           |
| RP1-167F1.2 | PLCD3     | -0.415767608 | 0           |
| RP1-167F1.2 | PLAU      | -0.522881308 | 0           |
| RP1-167F1.2 | LRRK2     | -0.224314856 | 2.20E-06    |
| RP1-167F1.2 | SFN       | -0.536969281 | 0           |
| RP1-167F1.2 | LPAR5     | -0.340153383 | 3.22E-13    |
| RP1-167F1.2 | NGEF      | -0.436730569 | 0           |
| RP1-167F1.2 | DTX4      | -0.432136323 | 0           |
| RP1-167F1.2 | CST6      | -0.39637053  | 0           |
| RP1-167F1.2 | QPCT      | -0.411586108 | 0           |
| RP1-167F1.2 | TIMP1     | -0.517576457 | 0           |
| RP1-167F1.2 | CAMK2N1   | -0.460884298 | 0           |
| RP1-167F1.2 | KLHDC8A   | -0.153580962 | 0.001261557 |
| RP1-167F1.2 | PDLIM4    | -0.510258654 | 0           |
| RP1-167F1.2 | SCEL      | -0.394315877 | 0           |

|               |          |              |             |
|---------------|----------|--------------|-------------|
| RP1-167F1.2   | LCN2     | -0.583530582 | 0           |
| RP1-167F1.2   | PROS1    | -0.476004987 | 0           |
| RP1-167F1.2   | GABRB2   | -0.408489661 | 0           |
| RP1-167F1.2   | TMPRSS6  | -0.493130686 | 0           |
| RP1-167F1.2   | KLK7     | -0.37481898  | 4.32E-16    |
| RP1-167F1.2   | PDZK1IP1 | -0.584318203 | 0           |
| RP1-167F1.2   | CDH3     | -0.390547548 | 0           |
| RP1-167F1.2   | LRP4     | -0.211177759 | 8.50E-06    |
| RP1-167F1.2   | IGSF1    | -0.099346698 | 0.037491359 |
| RP1-167F1.2   | B3GNT3   | -0.47028966  | 0           |
| RP1-167F1.2   | CLDN1    | -0.37985544  | 6.21E-17    |
| RP1-167F1.2   | GDF15    | -0.470925941 | 0           |
| RP1-167F1.2   | ARHGAP36 | -0.161163977 | 0.000700676 |
| RP1-167F1.2   | LAMB3    | -0.439497811 | 0           |
| RP1-167F1.2   | KLK10    | -0.426353623 | 0           |
| RP1-167F1.2   | DPP4     | -0.462836686 | 0           |
| RP1-167F1.2   | METTL7B  | -0.447340979 | 0           |
| RP1-167F1.2   | LIPH     | -0.51455717  | 0           |
| RP1-167F1.2   | CLDN16   | -0.357537225 | 1.43E-14    |
| RP1-167F1.2   | CHI3L1   | -0.597462108 | 0           |
| RP1-167F1.2   | SLC22A31 | -0.451836951 | 1.79E-23    |
| RP1-167F1.2   | TACSTD2  | -0.489857085 | 0           |
| RP1-167F1.2   | SFTPB    | -0.559147644 | 0           |
| RP1-167F1.2   | RXRG     | -0.394894998 | 0           |
| RP1-167F1.2   | DCSTAMP  | -0.50755523  | 4.04E-30    |
| RP1-167F1.2   | CITED1   | -0.522617207 | 0           |
| RP1-167F1.2   | SERPINA1 | -0.577812276 | 0           |
| RP1-167F1.2   | PRR15    | -0.290620169 | 6.53E-10    |
| RP1-167F1.2   | SLC34A2  | -0.55227294  | 0           |
| RP1-167F1.2   | FN1      | -0.54388455  | 0           |
| RP1-167F1.2   | ZCCHC12  | -0.208038336 | 1.16E-05    |
| RP11-367F23.1 | TFF3     | 0.677653863  | 2.60E-60    |
| RP11-367F23.1 | CCL21    | 0.45265663   | 1.46E-23    |
| RP11-367F23.1 | TPO      | 0.65786267   | 9.04E-56    |
| RP11-367F23.1 | MT1G     | 0.51425684   | 5.26E-31    |
| RP11-367F23.1 | DIO1     | 0.656262398  | 2.03E-55    |
| RP11-367F23.1 | DPT      | 0.400968929  | 2.19E-18    |
| RP11-367F23.1 | CDH16    | 0.671864688  | 6.03E-59    |
| RP11-367F23.1 | CRABP1   | 0.45706683   | 4.79E-24    |
| RP11-367F23.1 | SLC26A7  | 0.490049085  | 6.72E-28    |
| RP11-367F23.1 | MT1H     | 0.485144086  | 2.67E-27    |
| RP11-367F23.1 | SLC26A4  | 0.483077366  | 4.75E-27    |
| RP11-367F23.1 | SLC5A8   | 0.574554393  | 6.33E-40    |
| RP11-367F23.1 | PKHD1L1  | 0.700519323  | 5.05E-66    |
| RP11-367F23.1 | TFCP2L1  | 0.581151211  | 5.13E-41    |
| RP11-367F23.1 | WSCD2    | 0.666861417  | 8.61E-58    |
| RP11-367F23.1 | IPCEF1   | 0.629885016  | 6.59E-50    |
| RP11-367F23.1 | SLC5A5   | 0.583287577  | 2.25E-41    |
| RP11-367F23.1 | MT1F     | 0.604770176  | 3.91E-45    |
| RP11-367F23.1 | FOSB     | 0.474280556  | 5.27E-26    |
| RP11-367F23.1 | SEMA3D   | 0.696439628  | 5.78E-65    |

|               |           |             |          |
|---------------|-----------|-------------|----------|
| RP11-367F23.1 | BMP8A     | 0.548253028 | 8.23E-36 |
| RP11-367F23.1 | MATN2     | 0.544431356 | 3.04E-35 |
| RP11-367F23.1 | PLA2R1    | 0.69816505  | 2.07E-65 |
| RP11-367F23.1 | COL23A1   | 0.457694586 | 4.08E-24 |
| RP11-367F23.1 | HGD       | 0.578298609 | 1.53E-40 |
| RP11-367F23.1 | TCEAL2    | 0.487798606 | 1.27E-27 |
| RP11-367F23.1 | CHRD1     | 0.432181396 | 2.10E-21 |
| RP11-367F23.1 | TNFRSF11B | 0.603191465 | 7.56E-45 |
| RP11-367F23.1 | FAM167A   | 0.572387875 | 1.43E-39 |
| RP11-367F23.1 | KIT       | 0.676668622 | 4.46E-60 |
| RP11-367F23.1 | SLC4A4    | 0.593431967 | 4.09E-43 |
| RP11-367F23.1 | SMOC2     | 0.484407994 | 3.28E-27 |
| RP11-367F23.1 | FHL1      | 0.612982736 | 1.20E-46 |
| RP11-367F23.1 | OTOS      | 0.549793725 | 4.83E-36 |
| RP11-367F23.1 | IGFBPL1   | 0.591024835 | 1.07E-42 |
| RP11-367F23.1 | HBB       | 0.327699855 | 1.90E-12 |
| RP11-367F23.1 | BEX1      | 0.372469435 | 6.79E-16 |
| RP11-367F23.1 | FABP4     | 0.429102671 | 4.30E-21 |
| RP11-367F23.1 | LMOD1     | 0.534540227 | 8.31E-34 |
| RP11-367F23.1 | SOD3      | 0.524176904 | 2.37E-32 |
| RP11-367F23.1 | TMEM171   | 0.610508004 | 3.46E-46 |
| RP11-367F23.1 | PI16      | 0.420491614 | 3.09E-20 |
| RP11-367F23.1 | ZMAT4     | 0.649331418 | 6.45E-54 |
| RP11-367F23.1 | MFAP4     | 0.250461592 | 1.05E-07 |
| RP11-367F23.1 | CWH43     | 0.649815805 | 5.08E-54 |
| RP11-367F23.1 | SPX       | 0.501512116 | 2.44E-29 |
| RP11-367F23.1 | APOD      | 0.355899919 | 1.48E-14 |
| RP11-367F23.1 | DPP6      | 0.629703031 | 7.16E-50 |
| RP11-367F23.1 | MMRN1     | 0.417075328 | 6.64E-20 |
| RP11-367F23.1 | WDR72     | 0.485782168 | 2.24E-27 |
| RP11-367F23.1 | MPPED2    | 0.572909006 | 1.17E-39 |
| RP11-367F23.1 | PAPSS2    | 0.550996269 | 3.19E-36 |
| RP11-367F23.1 | DCN       | 0.303060898 | 8.88E-11 |
| RP11-367F23.1 | SORBS2    | 0.648513381 | 9.64E-54 |
| RP11-367F23.1 | EGR2      | 0.411957779 | 2.06E-19 |
| RP11-367F23.1 | EDN3      | 0.226894302 | 1.56E-06 |
| RP11-367F23.1 | DIO2      | 0.441423933 | 2.32E-22 |
| RP11-367F23.1 | ITPR1     | 0.590718654 | 1.21E-42 |
| RP11-367F23.1 | CFD       | 0.301345876 | 1.15E-10 |
| RP11-367F23.1 | CPXM1     | 0.482484321 | 5.60E-27 |
| RP11-367F23.1 | ELMO1     | 0.585038415 | 1.14E-41 |
| RP11-367F23.1 | GPC3      | 0.498230032 | 6.39E-29 |
| RP11-367F23.1 | MYOC      | 0.236897586 | 5.14E-07 |
| RP11-367F23.1 | DEPTOR    | 0.663862765 | 4.13E-57 |
| RP11-367F23.1 | DGKI      | 0.76349291  | 5.19E-85 |
| RP11-367F23.1 | CARTPT    | 0.512575514 | 8.81E-31 |
| RP11-367F23.1 | IYD       | 0.393877495 | 9.62E-18 |
| RP11-367F23.1 | LYVE1     | 0.433460874 | 1.55E-21 |
| RP11-367F23.1 | CLCNKB    | 0.524851225 | 1.91E-32 |
| RP11-367F23.1 | NCAM1     | 0.510208219 | 1.81E-30 |
| RP11-367F23.1 | HBA2      | 0.284589553 | 1.26E-09 |



|               |            |             |          |
|---------------|------------|-------------|----------|
| RP11-367F23.1 | GLT8D2     | 0.517306177 | 2.05E-31 |
| RP11-367F23.1 | OGDHL      | 0.452601434 | 1.48E-23 |
| RP11-367F23.1 | LIFR       | 0.460340806 | 2.07E-24 |
| RP11-367F23.1 | CSGALNACT1 | 0.639102958 | 9.00E-52 |
| RP11-367F23.1 | RAP1GAP    | 0.485400043 | 2.49E-27 |
| RP11-367F23.1 | COL9A3     | 0.527397446 | 8.47E-33 |
| RP11-367F23.1 | FBLN1      | 0.358964008 | 8.51E-15 |
| RP11-367F23.1 | EFEMP1     | 0.544627383 | 2.85E-35 |
| RP11-367F23.1 | AOX1       | 0.595148499 | 2.05E-43 |
| RP11-367F23.1 | GRIN2C     | 0.610481053 | 3.50E-46 |
| RP11-367F23.1 | C11orf74   | 0.549062667 | 6.22E-36 |
| RP11-367F23.1 | PPARGC1A   | 0.562764263 | 4.91E-38 |
| RP11-367F23.1 | ANGPTL1    | 0.537715664 | 2.91E-34 |
| RP11-367F23.1 | SCARA5     | 0.404261637 | 1.09E-18 |
| RP11-367F23.1 | LTF        | 0.503313521 | 1.43E-29 |
| RP11-367F23.1 | CA4        | 0.401163467 | 2.10E-18 |
| RP11-367F23.1 | TG         | 0.434781289 | 1.14E-21 |
| RP11-367F23.1 | FCGBP      | 0.550037979 | 4.44E-36 |
| RP11-367F23.1 | PBX4       | 0.559038476 | 1.87E-37 |
| RP11-367F23.1 | CYR61      | 0.50396075  | 1.18E-29 |
| RP11-367F23.1 | FOS        | 0.458948619 | 2.96E-24 |
| RP11-367F23.1 | KHDRBS2    | 0.55678899  | 4.17E-37 |
| RP11-367F23.1 | MUM1L1     | 0.587902932 | 3.70E-42 |
| RP11-367F23.1 | RGS16      | 0.503289266 | 1.44E-29 |
| RP11-367F23.1 | MT1M       | 0.526525113 | 1.12E-32 |
| RP11-367F23.1 | LRP2       | 0.570934412 | 2.45E-39 |
| RP11-367F23.1 | MAFB       | 0.577528828 | 2.05E-40 |
| RP11-367F23.1 | KCNK2      | 0.62045204  | 4.60E-48 |
| RP11-367F23.1 | TBC1D4     | 0.478470878 | 1.69E-26 |
| RP11-367F23.1 | MIOX       | 0.558015029 | 2.70E-37 |
| RP11-367F23.1 | TPPP       | 0.545529503 | 2.09E-35 |
| RP11-367F23.1 | FMOD       | 0.621008489 | 3.59E-48 |
| RP11-367F23.1 | CITED2     | 0.575990259 | 3.68E-40 |
| RP11-367F23.1 | RGS8       | 0.634534742 | 7.69E-51 |
| RP11-367F23.1 | ABI3BP     | 0.283198784 | 1.53E-09 |
| RP11-367F23.1 | ADH1B      | 0.390182696 | 2.05E-17 |
| RP11-367F23.1 | OGN        | 0.358191915 | 9.79E-15 |
| RP11-367F23.1 | NR4A1      | 0.457230334 | 4.59E-24 |
| RP11-367F23.1 | FOXJ1      | 0.523297206 | 3.13E-32 |
| RP11-367F23.1 | ALDH1A1    | 0.501429564 | 2.50E-29 |
| RP11-367F23.1 | OCA2       | 0.662698223 | 7.56E-57 |
| RP11-367F23.1 | TMEM139    | 0.538616508 | 2.15E-34 |
| RP11-367F23.1 | ARHGAP24   | 0.513018268 | 7.69E-31 |
| RP11-367F23.1 | SLC25A15   | 0.597318887 | 8.48E-44 |
| RP11-367F23.1 | DES        | 0.332314441 | 8.87E-13 |
| RP11-367F23.1 | GDF10      | 0.546122555 | 1.71E-35 |
| RP11-367F23.1 | KIAA1324   | 0.50016773  | 3.62E-29 |
| RP11-367F23.1 | JUN        | 0.487785557 | 1.27E-27 |
| RP11-367F23.1 | C7         | 0.247011123 | 1.59E-07 |
| RP11-367F23.1 | LGI3       | 0.411216083 | 2.42E-19 |
| RP11-367F23.1 | CDON       | 0.516213278 | 2.88E-31 |

|               |          |             |          |
|---------------|----------|-------------|----------|
| RP11-367F23.1 | BCL2     | 0.584611468 | 1.34E-41 |
| RP11-367F23.1 | HLF      | 0.384105231 | 6.98E-17 |
| RP11-367F23.1 | EGR1     | 0.391368436 | 1.61E-17 |
| RP11-367F23.1 | IP6K3    | 0.561908666 | 6.69E-38 |
| RP11-367F23.1 | SCUBE3   | 0.624268747 | 8.39E-49 |
| RP11-367F23.1 | PKNOX2   | 0.611575229 | 2.19E-46 |
| RP11-367F23.1 | SMAD9    | 0.633835765 | 1.06E-50 |
| RP11-367F23.1 | IQGAP2   | 0.550094574 | 4.36E-36 |
| RP11-367F23.1 | GNA14    | 0.6108402   | 3.00E-46 |
| RP11-367F23.1 | LAYN     | 0.56173193  | 7.13E-38 |
| RP11-367F23.1 | AVPR1A   | 0.477028761 | 2.50E-26 |
| RP11-367F23.1 | PDLIM3   | 0.565235307 | 2.00E-38 |
| RP11-367F23.1 | GPM6A    | 0.452000729 | 1.72E-23 |
| RP11-367F23.1 | SDPR     | 0.292512044 | 4.14E-10 |
| RP11-367F23.1 | CRYAB    | 0.350545351 | 3.87E-14 |
| RP11-367F23.1 | FOXA2    | 0.581403428 | 4.66E-41 |
| RP11-367F23.1 | C8orf88  | 0.485973514 | 2.12E-27 |
| RP11-367F23.1 | ISM1     | 0.431175218 | 2.66E-21 |
| RP11-367F23.1 | BMP2     | 0.585655006 | 8.94E-42 |
| RP11-367F23.1 | ID4      | 0.655709353 | 2.69E-55 |
| RP11-367F23.1 | NUPR1    | 0.267908265 | 1.19E-08 |
| RP11-367F23.1 | SERTM1   | 0.577913598 | 1.77E-40 |
| RP11-367F23.1 | IRS1     | 0.4354271   | 9.76E-22 |
| RP11-367F23.1 | FIBIN    | 0.363338159 | 3.80E-15 |
| RP11-367F23.1 | PODN     | 0.338471544 | 3.15E-13 |
| RP11-367F23.1 | TDRD9    | 0.454914891 | 8.27E-24 |
| RP11-367F23.1 | EPHA3    | 0.419487082 | 3.87E-20 |
| RP11-367F23.1 | AIF1L    | 0.512315578 | 9.54E-31 |
| RP11-367F23.1 | EBF4     | 0.566798557 | 1.13E-38 |
| RP11-367F23.1 | ADM2     | 0.5213426   | 5.80E-32 |
| RP11-367F23.1 | GSTM3    | 0.462936673 | 1.06E-24 |
| RP11-367F23.1 | HSD17B6  | 0.455483823 | 7.16E-24 |
| RP11-367F23.1 | AGR3     | 0.529909784 | 3.77E-33 |
| RP11-367F23.1 | EPHB1    | 0.402607923 | 1.55E-18 |
| RP11-367F23.1 | TMOD1    | 0.450341168 | 2.60E-23 |
| RP11-367F23.1 | WASF3    | 0.4946899   | 1.78E-28 |
| RP11-367F23.1 | SELV     | 0.570006177 | 3.46E-39 |
| RP11-367F23.1 | ENPP1    | 0.234084983 | 7.06E-07 |
| RP11-367F23.1 | SYNE1    | 0.602211352 | 1.14E-44 |
| RP11-367F23.1 | PLCH1    | 0.589025902 | 2.37E-42 |
| RP11-367F23.1 | CCDC146  | 0.572292132 | 1.48E-39 |
| RP11-367F23.1 | SLC16A2  | 0.588232575 | 3.25E-42 |
| RP11-367F23.1 | IER2     | 0.423828467 | 1.45E-20 |
| RP11-367F23.1 | KCNAB1   | 0.419598713 | 3.78E-20 |
| RP11-367F23.1 | SYNDIG1  | 0.534554837 | 8.27E-34 |
| RP11-367F23.1 | C16orf89 | 0.352162359 | 2.90E-14 |
| RP11-367F23.1 | CTGF     | 0.43234684  | 2.02E-21 |
| RP11-367F23.1 | NR4A3    | 0.404607624 | 1.01E-18 |
| RP11-367F23.1 | KIAA1456 | 0.393567143 | 1.03E-17 |
| RP11-367F23.1 | AQP4     | 0.350621804 | 3.82E-14 |
| RP11-367F23.1 | RNF150   | 0.628795237 | 1.08E-49 |

|               |          |             |             |
|---------------|----------|-------------|-------------|
| RP11-367F23.1 | C1S      | 0.270521578 | 8.43E-09    |
| RP11-367F23.1 | PFKFB2   | 0.365507503 | 2.54E-15    |
| RP11-367F23.1 | PROX1    | 0.564715028 | 2.42E-38    |
| RP11-367F23.1 | TCF7L1   | 0.608305893 | 8.83E-46    |
| RP11-367F23.1 | HSPB6    | 0.316404057 | 1.16E-11    |
| RP11-367F23.1 | FHDC1    | 0.303971813 | 7.75E-11    |
| RP11-367F23.1 | PRR15L   | 0.307569941 | 4.51E-11    |
| RP11-367F23.1 | SLC1A1   | 0.45708452  | 4.77E-24    |
| RP11-367F23.1 | BTBD11   | 0.472738156 | 7.97E-26    |
| RP11-367F23.1 | TRIM58   | 0.508120859 | 3.40E-30    |
| RP11-367F23.1 | LRIG1    | 0.530919405 | 2.71E-33    |
| RP11-367F23.1 | ROR2     | 0.680213843 | 6.33E-61    |
| RP11-367F23.1 | GPR125   | 0.633318464 | 1.35E-50    |
| RP11-367F23.1 | FLRT1    | 0.604623794 | 4.16E-45    |
| RP11-367F23.1 | PGF      | 0.600188226 | 2.62E-44    |
| RP11-367F23.1 | DUSP1    | 0.469818463 | 1.74E-25    |
| RP11-367F23.1 | PLA2G7   | 0.649944434 | 4.77E-54    |
| RP11-367F23.1 | PLSCR4   | 0.455764814 | 6.67E-24    |
| RP11-367F23.1 | FAM46B   | 0.49953738  | 4.36E-29    |
| RP11-367F23.1 | GLDC     | 0.542388961 | 6.08E-35    |
| RP11-367F23.1 | ZBTB16   | 0.336647587 | 4.29E-13    |
| RP11-367F23.1 | OMD      | 0.316578886 | 1.12E-11    |
| RP11-367F23.1 | HSD11B2  | 0.418270071 | 5.09E-20    |
| RP11-367F23.1 | FGL2     | 0.309891483 | 3.17E-11    |
| RP11-367F23.1 | CLCNKA   | 0.544087974 | 3.42E-35    |
| RP11-367F23.1 | GATM     | 0.270136332 | 8.87E-09    |
| RP11-367F23.1 | TNS3     | 0.580135191 | 7.59E-41    |
| RP11-367F23.1 | TOB1     | 0.635038592 | 6.08E-51    |
| RP11-367F23.1 | MARC2    | 0.485262881 | 2.59E-27    |
| RP11-367F23.1 | LRRC2    | 0.448659195 | 3.95E-23    |
| RP11-367F23.1 | SORD     | 0.48060774  | 9.40E-27    |
| RP11-367F23.1 | RIMS4    | 0.463732837 | 8.61E-25    |
| RP11-367F23.1 | SLC29A4  | 0.636690778 | 2.81E-51    |
| RP11-367F23.1 | SLC39A14 | 0.465967996 | 4.80E-25    |
| RP11-367F23.1 | FAXDC2   | 0.490053482 | 6.71E-28    |
| RP11-367F23.1 | HSPB8    | 0.576845004 | 2.66E-40    |
| RP11-367F23.1 | CCL19    | 0.151555544 | 0.001448524 |
| RP11-367F23.1 | KCNIP3   | 0.430131822 | 3.39E-21    |
| RP11-367F23.1 | CGNL1    | 0.430488557 | 3.12E-21    |
| RP11-367F23.1 | ATF3     | 0.382327656 | 9.94E-17    |
| RP11-367F23.1 | SGCD     | 0.545640283 | 2.02E-35    |
| RP11-367F23.1 | STARD13  | 0.605583645 | 2.78E-45    |
| RP11-367F23.1 | LDHD     | 0.387241235 | 3.72E-17    |
| RP11-367F23.1 | RCAN1    | 0.590185893 | 1.50E-42    |
| RP11-367F23.1 | ID3      | 0.5985976   | 5.03E-44    |
| RP11-367F23.1 | SYTL3    | 0.4446449   | 1.06E-22    |
| RP11-367F23.1 | MT1E     | 0.411882177 | 2.09E-19    |
| RP11-367F23.1 | CAMK1D   | 0.366923095 | 1.95E-15    |
| RP11-367F23.1 | PRKCQ    | 0.432509676 | 1.94E-21    |
| RP11-367F23.1 | NUAK2    | 0.627518935 | 1.94E-49    |
| RP11-367F23.1 | LIPG     | 0.365950904 | 2.33E-15    |

|               |          |             |             |
|---------------|----------|-------------|-------------|
| RP11-367F23.1 | SLC25A25 | 0.559461451 | 1.61E-37    |
| RP11-367F23.1 | PRKX     | 0.515525766 | 3.56E-31    |
| RP11-367F23.1 | SRPX     | 0.291450209 | 4.82E-10    |
| RP11-367F23.1 | FAM189A1 | 0.409023051 | 3.91E-19    |
| RP11-367F23.1 | PLEKHH1  | 0.474115876 | 5.51E-26    |
| RP11-367F23.1 | WNT11    | 0.56187278  | 6.78E-38    |
| RP11-367F23.1 | SNAI1    | 0.635420717 | 5.09E-51    |
| RP11-367F23.1 | FDCSP    | 0.129769365 | 0.006474302 |
| RP11-367F23.1 | MT1X     | 0.311512605 | 2.47E-11    |
| RP11-367F23.1 | ACACB    | 0.523310528 | 3.12E-32    |
| RP11-367F23.1 | ARC      | 0.253113487 | 7.62E-08    |
| RP11-367F23.1 | KLK4     | 0.385255461 | 5.55E-17    |
| RP11-367F23.1 | ZFPM2    | 0.502785865 | 1.67E-29    |
| RP11-367F23.1 | AKAP12   | 0.476735572 | 2.71E-26    |
| RP11-367F23.1 | GJB6     | 0.621907152 | 2.41E-48    |
| RP11-367F23.1 | ERO1LB   | 0.627383617 | 2.06E-49    |
| RP11-367F23.1 | DNALI1   | 0.521967134 | 4.77E-32    |
| RP11-367F23.1 | HKDC1    | 0.536045748 | 5.06E-34    |
| RP11-367F23.1 | ZFP36L2  | 0.599417736 | 3.60E-44    |
| RP11-367F23.1 | CAPSL    | 0.487590986 | 1.35E-27    |
| RP11-367F23.1 | CYP7B1   | 0.542506974 | 5.84E-35    |
| RP11-367F23.1 | CPQ      | 0.608467878 | 8.25E-46    |
| RP11-367F23.1 | RPS6KA6  | 0.559339345 | 1.68E-37    |
| RP11-367F23.1 | TLE1     | 0.642510591 | 1.77E-52    |
| RP11-367F23.1 | TP53INP2 | 0.602315302 | 1.09E-44    |
| RP11-367F23.1 | KATNAL2  | 0.538353673 | 2.35E-34    |
| RP11-367F23.1 | SGPP2    | 0.47715954  | 2.42E-26    |
| RP11-367F23.1 | CTH      | 0.631728122 | 2.82E-50    |
| RP11-367F23.1 | KIF12    | 0.514964352 | 4.23E-31    |
| RP11-367F23.1 | TMEM220  | 0.44556234  | 8.48E-23    |
| RP11-367F23.1 | CENPJ    | 0.61176615  | 2.02E-46    |
| RP11-367F23.1 | FAM155B  | 0.160042865 | 0.000764251 |
| RP11-367F23.1 | WFS1     | 0.636450213 | 3.14E-51    |
| RP11-367F23.1 | SELENBP1 | 0.352626044 | 2.67E-14    |
| RP11-367F23.1 | SNTA1    | 0.363790921 | 3.49E-15    |
| RP11-367F23.1 | FRAS1    | 0.532246628 | 1.76E-33    |
| RP11-367F23.1 | FBLN7    | 0.557075229 | 3.77E-37    |
| RP11-367F23.1 | AGPAT9   | 0.457411893 | 4.39E-24    |
| RP11-367F23.1 | GPR83    | 0.410429706 | 2.88E-19    |
| RP11-367F23.1 | PRTG     | 0.470060447 | 1.63E-25    |
| RP11-367F23.1 | EGR3     | 0.300279076 | 1.34E-10    |
| RP11-367F23.1 | GRAMD2   | 0.61296458  | 1.21E-46    |
| RP11-367F23.1 | HYOU1    | 0.588044491 | 3.50E-42    |
| RP11-367F23.1 | FBLN5    | 0.390829859 | 1.80E-17    |
| RP11-367F23.1 | ITM2A    | 0.445540638 | 8.53E-23    |
| RP11-367F23.1 | SRF      | 0.561205835 | 8.61E-38    |
| RP11-367F23.1 | FGFR2    | 0.447704167 | 5.01E-23    |
| RP11-367F23.1 | MT1A     | 0.337335891 | 3.82E-13    |
| RP11-367F23.1 | MAMDC2   | 0.386200108 | 4.59E-17    |
| RP11-367F23.1 | FHL2     | 0.530282246 | 3.34E-33    |
| RP11-367F23.1 | FTCDNL1  | 0.44117514  | 2.47E-22    |

|               |          |             |             |
|---------------|----------|-------------|-------------|
| RP11-367F23.1 | PKIA     | 0.384304662 | 6.71E-17    |
| RP11-367F23.1 | DNAJB4   | 0.464852828 | 6.43E-25    |
| RP11-367F23.1 | SLC25A33 | 0.580530081 | 6.52E-41    |
| RP11-367F23.1 | EYA2     | 0.462210437 | 1.28E-24    |
| RP11-367F23.1 | LPAR1    | 0.473981835 | 5.71E-26    |
| RP11-367F23.1 | STX11    | 0.2515274   | 9.23E-08    |
| RP11-367F23.1 | ARHGEF28 | 0.428751124 | 4.67E-21    |
| RP11-367F23.1 | OR2W3    | 0.495585638 | 1.38E-28    |
| RP11-367F23.1 | ALDH1B1  | 0.44917325  | 3.48E-23    |
| RP11-367F23.1 | CXCL12   | 0.282433967 | 1.70E-09    |
| RP11-367F23.1 | OLFM2    | 0.502327287 | 1.92E-29    |
| RP11-367F23.1 | TUB      | 0.420594875 | 3.02E-20    |
| RP11-367F23.1 | HTRA3    | 0.459141099 | 2.82E-24    |
| RP11-367F23.1 | CKB      | 0.475256718 | 4.05E-26    |
| RP11-367F23.1 | RGS2     | 0.325230371 | 2.83E-12    |
| RP11-367F23.1 | SHANK2   | 0.576668551 | 2.85E-40    |
| RP11-367F23.1 | CNTFR    | 0.356158738 | 1.42E-14    |
| RP11-367F23.1 | CYTH3    | 0.549974575 | 4.54E-36    |
| RP11-367F23.1 | PLAC9    | 0.312078984 | 2.26E-11    |
| RP11-367F23.1 | WVOX     | 0.484112678 | 3.57E-27    |
| RP11-367F23.1 | NPR3     | 0.563308655 | 4.03E-38    |
| RP11-367F23.1 | SDC2     | 0.535368306 | 6.33E-34    |
| RP11-367F23.1 | KLF15    | 0.312258557 | 2.20E-11    |
| RP11-367F23.1 | TMEM164  | 0.660863781 | 1.95E-56    |
| RP11-367F23.1 | LONRF3   | 0.298794265 | 1.67E-10    |
| RP11-367F23.1 | GBP1     | 0.316293277 | 1.18E-11    |
| RP11-367F23.1 | ARHGAP6  | 0.516078953 | 3.00E-31    |
| RP11-367F23.1 | TMEM119  | 0.252790652 | 7.92E-08    |
| RP11-367F23.1 | SH3RF1   | 0.552783064 | 1.71E-36    |
| RP11-367F23.1 | CRELD2   | 0.546303256 | 1.61E-35    |
| RP11-367F23.1 | PCP4     | 0.253371499 | 7.38E-08    |
| RP11-367F23.1 | GCSH     | 0.482596661 | 5.43E-27    |
| RP11-367F23.1 | IMPA2    | 0.531247629 | 2.44E-33    |
| RP11-367F23.1 | C1R      | 0.255900983 | 5.41E-08    |
| RP11-367F23.1 | SUCNR1   | 0.358743443 | 8.86E-15    |
| RP11-367F23.1 | SFRP1    | 0.429124596 | 4.28E-21    |
| RP11-367F23.1 | UGT8     | 0.451881014 | 1.77E-23    |
| RP11-367F23.1 | TLE4     | 0.458875711 | 3.02E-24    |
| RP11-367F23.1 | ANTXR1   | 0.484123032 | 3.55E-27    |
| RP11-367F23.1 | GPX3     | 0.565804806 | 1.63E-38    |
| RP11-367F23.1 | DPY19L2  | 0.485047138 | 2.75E-27    |
| RP11-367F23.1 | FAM46C   | 0.380925397 | 1.31E-16    |
| RP11-367F23.1 | IL33     | 0.341154585 | 1.99E-13    |
| RP11-367F23.1 | PEG3     | 0.508629366 | 2.92E-30    |
| RP11-367F23.1 | FAHD2A   | 0.504271527 | 1.08E-29    |
| RP11-367F23.1 | PTGDS    | 0.081609151 | 0.087659318 |
| RP11-367F23.1 | CHCHD10  | 0.302169416 | 1.01E-10    |
| RP11-367F23.1 | CD36     | 0.349517274 | 4.65E-14    |
| RP11-367F23.1 | ANKRD37  | 0.595778048 | 1.59E-43    |
| RP11-367F23.1 | TSPAN33  | 0.435854047 | 8.82E-22    |
| RP11-367F23.1 | PRDM16   | 0.516008457 | 3.07E-31    |

|               |          |             |             |
|---------------|----------|-------------|-------------|
| RP11-367F23.1 | UST      | 0.270588244 | 8.36E-09    |
| RP11-367F23.1 | NEXN     | 0.447228143 | 5.63E-23    |
| RP11-367F23.1 | NUPR1L   | 0.180432486 | 0.000144147 |
| RP11-367F23.1 | SLC24A3  | 0.526242136 | 1.23E-32    |
| RP11-367F23.1 | MARC1    | 0.478542366 | 1.66E-26    |
| RP11-367F23.1 | MYH11    | 0.310390061 | 2.94E-11    |
| RP11-367F23.1 | APOA1    | 0.511308796 | 1.30E-30    |
| RP11-367F23.1 | TMEM178B | 0.545619857 | 2.03E-35    |
| RP11-367F23.1 | CAPN6    | 0.394306424 | 8.81E-18    |
| RP11-367F23.1 | PPM1L    | 0.522518619 | 4.01E-32    |
| RP11-367F23.1 | FZD8     | 0.607760791 | 1.11E-45    |
| RP11-367F23.1 | RCAN2    | 0.469300878 | 1.99E-25    |
| RP11-367F23.1 | COPZ2    | 0.510078149 | 1.88E-30    |
| RP11-367F23.1 | GAS1     | 0.34248357  | 1.59E-13    |
| RP11-367F23.1 | DACT1    | 0.532876836 | 1.43E-33    |
| RP11-367F23.1 | WBSCR17  | 0.526994187 | 9.64E-33    |
| RP11-367F23.1 | NCS1     | 0.54900281  | 6.35E-36    |
| RP11-367F23.1 | SPIRE2   | 0.561271934 | 8.41E-38    |
| RP11-367F23.1 | C15orf52 | 0.454928224 | 8.24E-24    |
| RP11-367F23.1 | SPAG5    | 0.559605564 | 1.53E-37    |
| RP11-367F23.1 | ARL4D    | 0.431699469 | 2.35E-21    |
| RP11-367F23.1 | FAM189A2 | 0.451744703 | 1.83E-23    |
| RP11-367F23.1 | MAP1LC3A | 0.442594704 | 1.75E-22    |
| RP11-367F23.1 | KLF6     | 0.329221971 | 1.48E-12    |
| RP11-367F23.1 | ADD3     | 0.398892066 | 3.39E-18    |
| RP11-367F23.1 | TSPAN7   | 0.371959368 | 7.49E-16    |
| RP11-367F23.1 | KLF9     | 0.316802351 | 1.09E-11    |
| RP11-367F23.1 | KCNQ1    | 0.312341819 | 2.17E-11    |
| RP11-367F23.1 | MAN1A1   | 0.337510842 | 3.71E-13    |
| RP11-367F23.1 | MLF1     | 0.41139977  | 2.33E-19    |
| RP11-367F23.1 | RARB     | 0.491322125 | 4.68E-28    |
| RP11-367F23.1 | CDC42EP2 | 0.434315619 | 1.27E-21    |
| RP11-367F23.1 | FAM3B    | 0.263097238 | 2.20E-08    |
| RP11-367F23.1 | GADD45B  | 0.309463402 | 3.38E-11    |
| RP11-367F23.1 | TMEM47   | 0.410895234 | 2.60E-19    |
| RP11-367F23.1 | SDF2L1   | 0.414073366 | 1.29E-19    |
| RP11-367F23.1 | CCDC85A  | 0.51497116  | 4.22E-31    |
| RP11-367F23.1 | CRYBG3   | 0.379680159 | 1.68E-16    |
| RP11-367F23.1 | FBLN2    | 0.232592086 | 8.34E-07    |
| RP11-367F23.1 | PEBP4    | 0.011859482 | 0.804301535 |
| RP11-367F23.1 | CDADC1   | 0.428349283 | 5.13E-21    |
| RP11-367F23.1 | FAM63A   | 0.447622891 | 5.11E-23    |
| RP11-367F23.1 | GLUL     | 0.456831046 | 5.08E-24    |
| RP11-367F23.1 | FREM2    | 0.342068254 | 1.70E-13    |
| RP11-367F23.1 | ACKR3    | 0.540493089 | 1.15E-34    |
| RP11-367F23.1 | DENND6A  | 0.559048263 | 1.87E-37    |
| RP11-367F23.1 | CLDN8    | 0.451754065 | 1.83E-23    |
| RP11-367F23.1 | UTS2R    | 0.428310583 | 5.17E-21    |
| RP11-367F23.1 | SCNN1B   | 0.377577338 | 2.53E-16    |
| RP11-367F23.1 | TTC30A   | 0.595590815 | 1.71E-43    |
| RP11-367F23.1 | CORO2B   | 0.480602918 | 9.42E-27    |

|               |          |              |             |
|---------------|----------|--------------|-------------|
| RP11-367F23.1 | TC2N     | 0.591114254  | 1.03E-42    |
| RP11-367F23.1 | ALDH2    | 0.402372039  | 1.63E-18    |
| RP11-367F23.1 | GPR183   | 0.2605374    | 3.04E-08    |
| RP11-367F23.1 | C4orf47  | 0.500671697  | 3.12E-29    |
| RP11-367F23.1 | SLC25A42 | 0.391623328  | 1.53E-17    |
| RP11-367F23.1 | LGMN     | 0.508774329  | 2.80E-30    |
| RP11-367F23.1 | ACSF2    | 0.527008655  | 9.59E-33    |
| RP11-367F23.1 | KIAA1467 | 0.513352591  | 6.94E-31    |
| RP11-367F23.1 | PRKG1    | 0.409460636  | 3.55E-19    |
| RP11-367F23.1 | GNAI1    | 0.506976329  | 4.80E-30    |
| RP11-367F23.1 | ABCC4    | 0.435106535  | 1.05E-21    |
| RP11-367F23.1 | PRPS1    | 0.518718507  | 1.32E-31    |
| RP11-367F23.1 | TSPAN5   | 0.687504992  | 1.05E-62    |
| RP11-367F23.1 | CR2      | 0.153101664  | 0.001292319 |
| RP11-367F23.1 | CCDC170  | 0.522579044  | 3.93E-32    |
| RP11-367F23.1 | RRAD     | 0.240879823  | 3.26E-07    |
| RP11-367F23.1 | SCGB2A1  | 0.444977664  | 9.79E-23    |
| RP11-367F23.1 | SESN3    | 0.392471407  | 1.29E-17    |
| RP11-367F23.1 | SGK223   | 0.488432076  | 1.06E-27    |
| RP11-367F23.1 | NDRG2    | 0.42109246   | 2.70E-20    |
| RP11-367F23.1 | C3orf52  | 0.55266959   | 1.78E-36    |
| RP11-367F23.1 | FLRT3    | -0.220454309 | 3.11E-06    |
| RP11-367F23.1 | MST1R    | -0.328523395 | 1.66E-12    |
| RP11-367F23.1 | SDC1     | -0.239346218 | 3.89E-07    |
| RP11-367F23.1 | ST8SIA4  | -0.320330976 | 6.22E-12    |
| RP11-367F23.1 | UBTD1    | -0.401919702 | 1.79E-18    |
| RP11-367F23.1 | EPHA2    | -0.1367256   | 0.004104182 |
| RP11-367F23.1 | TMEM130  | -0.279281651 | 2.62E-09    |
| RP11-367F23.1 | SPINK2   | -0.506056194 | 6.33E-30    |
| RP11-367F23.1 | MMP16    | -0.217616317 | 4.19E-06    |
| RP11-367F23.1 | SIGLEC15 | -0.421901815 | 2.24E-20    |
| RP11-367F23.1 | RIN1     | -0.428023753 | 5.53E-21    |
| RP11-367F23.1 | IL1RN    | -0.284652389 | 1.25E-09    |
| RP11-367F23.1 | FCER1G   | -0.270978454 | 7.94E-09    |
| RP11-367F23.1 | CD276    | -0.336874393 | 4.13E-13    |
| RP11-367F23.1 | CTSB     | -0.469259886 | 2.02E-25    |
| RP11-367F23.1 | FAM171A2 | -0.339052532 | 2.86E-13    |
| RP11-367F23.1 | ASPHD1   | -0.462431286 | 1.21E-24    |
| RP11-367F23.1 | C15orf48 | -0.188997391 | 6.76E-05    |
| RP11-367F23.1 | DYSF     | -0.250722725 | 1.02E-07    |
| RP11-367F23.1 | PDZRN4   | -0.273728503 | 5.52E-09    |
| RP11-367F23.1 | EFHD2    | -0.229546436 | 1.17E-06    |
| RP11-367F23.1 | ASF1B    | -0.375247853 | 3.98E-16    |
| RP11-367F23.1 | AQP1     | -0.270833206 | 8.09E-09    |
| RP11-367F23.1 | ARRDC2   | -0.433448676 | 1.56E-21    |
| RP11-367F23.1 | PRSS1    | -0.40896913  | 3.95E-19    |
| RP11-367F23.1 | MAPK13   | -0.459516983 | 2.56E-24    |
| RP11-367F23.1 | CST5     | -0.207636228 | 1.15E-05    |
| RP11-367F23.1 | AHR      | -0.210490982 | 8.68E-06    |
| RP11-367F23.1 | BAX      | -0.276440964 | 3.84E-09    |
| RP11-367F23.1 | C1orf115 | -0.47924846  | 1.37E-26    |

|               |          |              |             |
|---------------|----------|--------------|-------------|
| RP11-367F23.1 | PLK3     | -0.222715851 | 2.45E-06    |
| RP11-367F23.1 | JAG2     | -0.257238986 | 4.59E-08    |
| RP11-367F23.1 | RAD23B   | -0.460733711 | 1.87E-24    |
| RP11-367F23.1 | CA12     | -0.030415082 | 0.525039207 |
| RP11-367F23.1 | ADTRP    | -0.341899602 | 1.75E-13    |
| RP11-367F23.1 | UCP2     | -0.273827935 | 5.45E-09    |
| RP11-367F23.1 | IGFBP2   | -0.214288258 | 5.91E-06    |
| RP11-367F23.1 | LOXL2    | -0.206313284 | 1.32E-05    |
| RP11-367F23.1 | GPX1     | -0.40783228  | 5.05E-19    |
| RP11-367F23.1 | P3H3     | -0.432460031 | 1.97E-21    |
| RP11-367F23.1 | C2orf81  | -0.43982664  | 3.41E-22    |
| RP11-367F23.1 | CDT1     | -0.463881204 | 8.28E-25    |
| RP11-367F23.1 | SNX25    | -0.257421396 | 4.48E-08    |
| RP11-367F23.1 | MTHFD1L  | -0.295085925 | 2.86E-10    |
| RP11-367F23.1 | CDC42BPG | -0.324222589 | 3.34E-12    |
| RP11-367F23.1 | MSN      | -0.536645459 | 4.15E-34    |
| RP11-367F23.1 | SIGLEC6  | -0.358797006 | 8.77E-15    |
| RP11-367F23.1 | F2R      | 0.069418607  | 0.146477518 |
| RP11-367F23.1 | TMEM184A | -0.388201653 | 3.07E-17    |
| RP11-367F23.1 | CKS2     | -0.196597332 | 3.35E-05    |
| RP11-367F23.1 | TAX1BP3  | -0.347417148 | 6.73E-14    |
| RP11-367F23.1 | PMEPA1   | -0.330102673 | 1.28E-12    |
| RP11-367F23.1 | CXCL16   | -0.358233092 | 9.72E-15    |
| RP11-367F23.1 | FAXC     | -0.322529966 | 4.38E-12    |
| RP11-367F23.1 | VTCN1    | -0.202063386 | 1.99E-05    |
| RP11-367F23.1 | SH2D4A   | -0.386514715 | 4.31E-17    |
| RP11-367F23.1 | RNF24    | -0.362693341 | 4.28E-15    |
| RP11-367F23.1 | LY6G6C   | -0.338572231 | 3.10E-13    |
| RP11-367F23.1 | NID1     | -0.119929277 | 0.011912851 |
| RP11-367F23.1 | STAC     | -0.302439343 | 9.74E-11    |
| RP11-367F23.1 | RAB34    | -0.48014746  | 1.07E-26    |
| RP11-367F23.1 | HES4     | -0.215777324 | 5.07E-06    |
| RP11-367F23.1 | EPHA10   | -0.464856374 | 6.42E-25    |
| RP11-367F23.1 | ENTPD2   | -0.503544441 | 1.34E-29    |
| RP11-367F23.1 | DDB2     | -0.357927279 | 1.03E-14    |
| RP11-367F23.1 | NKAIN4   | -0.258546636 | 3.90E-08    |
| RP11-367F23.1 | TRIM29   | -0.150837121 | 0.001526853 |
| RP11-367F23.1 | ADCY8    | -0.463267963 | 9.71E-25    |
| RP11-367F23.1 | SFTA2    | -0.259512727 | 3.45E-08    |
| RP11-367F23.1 | NRIP1    | -0.284859055 | 1.22E-09    |
| RP11-367F23.1 | VWA1     | -0.183596015 | 0.000109404 |
| RP11-367F23.1 | APLNR    | -0.158428977 | 0.000865182 |
| RP11-367F23.1 | REN      | -0.556708393 | 4.29E-37    |
| RP11-367F23.1 | EDIL3    | -0.196768962 | 3.30E-05    |
| RP11-367F23.1 | AGRN     | -0.285799615 | 1.07E-09    |
| RP11-367F23.1 | TREM1    | -0.272627377 | 6.39E-09    |
| RP11-367F23.1 | SRL      | -0.274451476 | 5.02E-09    |
| RP11-367F23.1 | RASGRF1  | -0.421725646 | 2.34E-20    |
| RP11-367F23.1 | RMI2     | -0.366088066 | 2.28E-15    |
| RP11-367F23.1 | SAMD1    | -0.43952111  | 3.68E-22    |
| RP11-367F23.1 | MGAT4B   | -0.499364048 | 4.59E-29    |



|               |          |              |             |
|---------------|----------|--------------|-------------|
| RP11-367F23.1 | NXN      | -0.258877555 | 3.74E-08    |
| RP11-367F23.1 | SH3BGRL3 | -0.41046233  | 2.86E-19    |
| RP11-367F23.1 | CA11     | -0.507276752 | 4.39E-30    |
| RP11-367F23.1 | PLD3     | -0.418377304 | 4.97E-20    |
| RP11-367F23.1 | LURAP1L  | -0.370811576 | 9.32E-16    |
| RP11-367F23.1 | CARNS1   | -0.324702999 | 3.09E-12    |
| RP11-367F23.1 | PDLIM7   | -0.403969757 | 1.16E-18    |
| RP11-367F23.1 | BCL2L1   | -0.303669972 | 8.11E-11    |
| RP11-367F23.1 | GGT6     | -0.391573825 | 1.54E-17    |
| RP11-367F23.1 | DPYSL3   | -0.105872933 | 0.026541381 |
| RP11-367F23.1 | FYN      | -0.424081231 | 1.37E-20    |
| RP11-367F23.1 | TK1      | -0.344207528 | 1.18E-13    |
| RP11-367F23.1 | AK1      | -0.451045276 | 2.19E-23    |
| RP11-367F23.1 | HIGD1B   | -0.298779655 | 1.67E-10    |
| RP11-367F23.1 | TMEM59L  | -0.063254968 | 0.185873579 |
| RP11-367F23.1 | MEGF9    | -0.310088645 | 3.07E-11    |
| RP11-367F23.1 | ZFP36L1  | -0.193985721 | 4.28E-05    |
| RP11-367F23.1 | ADRA1B   | -0.288753067 | 7.07E-10    |
| RP11-367F23.1 | EPHA4    | -0.201749065 | 2.05E-05    |
| RP11-367F23.1 | TCERG1L  | -0.085664722 | 0.072964113 |
| RP11-367F23.1 | NGFR     | -0.345201704 | 9.91E-14    |
| RP11-367F23.1 | EBI3     | -0.353546462 | 2.27E-14    |
| RP11-367F23.1 | S100A10  | -0.131716561 | 0.0057106   |
| RP11-367F23.1 | S100B    | -0.260510734 | 3.05E-08    |
| RP11-367F23.1 | CD44     | -0.423442087 | 1.58E-20    |
| RP11-367F23.1 | BHLHE41  | -0.356939627 | 1.23E-14    |
| RP11-367F23.1 | FBXO2    | -0.441463365 | 2.30E-22    |
| RP11-367F23.1 | SLC30A2  | -0.199945816 | 2.44E-05    |
| RP11-367F23.1 | FRMD5    | -0.462762206 | 1.11E-24    |
| RP11-367F23.1 | SAMD11   | -0.172668724 | 0.00027816  |
| RP11-367F23.1 | SIPA1L2  | -0.321186998 | 5.43E-12    |
| RP11-367F23.1 | S100A16  | -0.310619705 | 2.83E-11    |
| RP11-367F23.1 | PPL      | -0.239546926 | 3.80E-07    |
| RP11-367F23.1 | ARHGD1B  | -0.236523261 | 5.36E-07    |
| RP11-367F23.1 | CDC42EP3 | -0.278925484 | 2.75E-09    |
| RP11-367F23.1 | RUNX2    | -0.493011757 | 2.89E-28    |
| RP11-367F23.1 | LAMC2    | -0.243195975 | 2.49E-07    |
| RP11-367F23.1 | BRINP1   | -0.451684562 | 1.86E-23    |
| RP11-367F23.1 | GPRC5B   | -0.455181556 | 7.73E-24    |
| RP11-367F23.1 | AQP5     | -0.128486657 | 0.007026189 |
| RP11-367F23.1 | PLAG1    | -0.487011095 | 1.59E-27    |
| RP11-367F23.1 | PTPRU    | -0.215498177 | 5.21E-06    |
| RP11-367F23.1 | ANGPTL4  | -0.20475897  | 1.53E-05    |
| RP11-367F23.1 | PALM3    | -0.336009436 | 4.78E-13    |
| RP11-367F23.1 | ACP5     | -0.292495874 | 4.15E-10    |
| RP11-367F23.1 | DLG4     | -0.492408925 | 3.43E-28    |
| RP11-367F23.1 | ETNK2    | -0.520306438 | 8.04E-32    |
| RP11-367F23.1 | CD109    | -0.244083202 | 2.24E-07    |
| RP11-367F23.1 | SNX22    | -0.318359502 | 8.50E-12    |
| RP11-367F23.1 | TMEM98   | -0.30643534  | 5.35E-11    |
| RP11-367F23.1 | CTHRC1   | -0.125203846 | 0.008635068 |

|               |          |              |             |
|---------------|----------|--------------|-------------|
| RP11-367F23.1 | S100A2   | -0.141976907 | 0.00286951  |
| RP11-367F23.1 | C11orf80 | -0.456194739 | 5.98E-24    |
| RP11-367F23.1 | SREBF1   | -0.356879202 | 1.24E-14    |
| RP11-367F23.1 | PRSS22   | -0.354809573 | 1.81E-14    |
| RP11-367F23.1 | CMTM3    | -0.351661796 | 3.18E-14    |
| RP11-367F23.1 | RDH5     | -0.492038715 | 3.81E-28    |
| RP11-367F23.1 | MYH10    | -0.359158191 | 8.21E-15    |
| RP11-367F23.1 | EVPL     | -0.282891268 | 1.60E-09    |
| RP11-367F23.1 | SCD      | -0.358296354 | 9.61E-15    |
| RP11-367F23.1 | CD151    | -0.386218406 | 4.58E-17    |
| RP11-367F23.1 | S100A4   | -0.364655879 | 2.97E-15    |
| RP11-367F23.1 | BNIP1    | -0.421605789 | 2.40E-20    |
| RP11-367F23.1 | MAP3K6   | -0.488725266 | 9.78E-28    |
| RP11-367F23.1 | MANEAL   | -0.531985496 | 1.92E-33    |
| RP11-367F23.1 | CD207    | -0.315859888 | 1.26E-11    |
| RP11-367F23.1 | CD1A     | -0.308864542 | 3.71E-11    |
| RP11-367F23.1 | C3       | -0.205470879 | 1.43E-05    |
| RP11-367F23.1 | NT5E     | -0.178069249 | 0.000176593 |
| RP11-367F23.1 | CACNG4   | -0.209811704 | 9.30E-06    |
| RP11-367F23.1 | FHOD1    | -0.468716627 | 2.33E-25    |
| RP11-367F23.1 | LEMD1    | -0.412613944 | 1.78E-19    |
| RP11-367F23.1 | ATP11A   | -0.256701118 | 4.90E-08    |
| RP11-367F23.1 | PPAP2C   | -0.311084949 | 2.64E-11    |
| RP11-367F23.1 | DRAM1    | -0.23687106  | 5.15E-07    |
| RP11-367F23.1 | CDA      | -0.222217132 | 2.58E-06    |
| RP11-367F23.1 | CCND2    | -0.371051999 | 8.90E-16    |
| RP11-367F23.1 | LCN6     | -0.221542677 | 2.77E-06    |
| RP11-367F23.1 | CDH4     | -0.344046962 | 1.21E-13    |
| RP11-367F23.1 | MMP11    | -0.326465397 | 2.32E-12    |
| RP11-367F23.1 | B3GAT1   | -0.245721062 | 1.85E-07    |
| RP11-367F23.1 | SPP1     | -0.222516988 | 2.50E-06    |
| RP11-367F23.1 | HLA-DQB1 | -0.296241519 | 2.42E-10    |
| RP11-367F23.1 | SDC3     | -0.406575694 | 6.63E-19    |
| RP11-367F23.1 | CX3CL1   | -0.164081699 | 0.000557455 |
| RP11-367F23.1 | SDK1     | -0.204979394 | 1.50E-05    |
| RP11-367F23.1 | DOCK9    | -0.383956721 | 7.19E-17    |
| RP11-367F23.1 | CSF2     | -0.391536899 | 1.56E-17    |
| RP11-367F23.1 | GRHL3    | -0.285469121 | 1.12E-09    |
| RP11-367F23.1 | TMEM92   | -0.417268393 | 6.36E-20    |
| RP11-367F23.1 | BASP1    | -0.329617712 | 1.38E-12    |
| RP11-367F23.1 | HRH1     | -0.184895295 | 9.76E-05    |
| RP11-367F23.1 | ESM1     | -0.013535214 | 0.777331217 |
| RP11-367F23.1 | B4GALNT3 | -0.348058562 | 6.01E-14    |
| RP11-367F23.1 | LMO3     | -0.284660616 | 1.25E-09    |
| RP11-367F23.1 | C9orf16  | -0.436264966 | 8.00E-22    |
| RP11-367F23.1 | SEMA3F   | -0.289415757 | 6.44E-10    |
| RP11-367F23.1 | PLA2G12B | -0.578790763 | 1.27E-40    |
| RP11-367F23.1 | KLK6     | -0.313316129 | 1.87E-11    |
| RP11-367F23.1 | ST3GAL5  | -0.514292868 | 5.20E-31    |
| RP11-367F23.1 | FAM132B  | -0.299609436 | 1.48E-10    |
| RP11-367F23.1 | CDKN1A   | 0.006828032  | 0.886561135 |

|               |          |              |             |
|---------------|----------|--------------|-------------|
| RP11-367F23.1 | E2F1     | -0.441473578 | 2.30E-22    |
| RP11-367F23.1 | B3GNT8   | -0.411661611 | 2.20E-19    |
| RP11-367F23.1 | MTMR11   | -0.418812761 | 4.50E-20    |
| RP11-367F23.1 | MYO1G    | -0.192653391 | 4.84E-05    |
| RP11-367F23.1 | TMSB10   | -0.36285646  | 4.16E-15    |
| RP11-367F23.1 | UNC5CL   | -0.421700682 | 2.35E-20    |
| RP11-367F23.1 | ABR      | -0.403236287 | 1.35E-18    |
| RP11-367F23.1 | PLP2     | -0.497712288 | 7.43E-29    |
| RP11-367F23.1 | SRCIN1   | -0.623720808 | 1.07E-48    |
| RP11-367F23.1 | PDE9A    | -0.387446623 | 3.57E-17    |
| RP11-367F23.1 | TREM2    | -0.29578521  | 2.59E-10    |
| RP11-367F23.1 | KDEL3    | -0.202351329 | 1.94E-05    |
| RP11-367F23.1 | PC       | -0.435886813 | 8.75E-22    |
| RP11-367F23.1 | C2CD4A   | -0.374953671 | 4.21E-16    |
| RP11-367F23.1 | PELI1    | -0.198918448 | 2.69E-05    |
| RP11-367F23.1 | SSX1     | -0.144628375 | 0.002384329 |
| RP11-367F23.1 | MROH6    | -0.453839155 | 1.08E-23    |
| RP11-367F23.1 | ESPN     | -0.510624102 | 1.60E-30    |
| RP11-367F23.1 | BMP1     | -0.449759896 | 3.01E-23    |
| RP11-367F23.1 | TM4SF4   | -0.350963894 | 3.60E-14    |
| RP11-367F23.1 | CORO2A   | -0.401397011 | 2.00E-18    |
| RP11-367F23.1 | CD164L2  | -0.526232935 | 1.23E-32    |
| RP11-367F23.1 | CTSS     | -0.299979078 | 1.40E-10    |
| RP11-367F23.1 | CLU      | -0.290763973 | 5.32E-10    |
| RP11-367F23.1 | TMSB4X   | -0.349118411 | 4.99E-14    |
| RP11-367F23.1 | WNT10A   | -0.30647911  | 5.32E-11    |
| RP11-367F23.1 | NAPSA    | -0.234897033 | 6.44E-07    |
| RP11-367F23.1 | PLEKHA4  | -0.460634279 | 1.92E-24    |
| RP11-367F23.1 | SFTPA1   | -0.151615671 | 0.001442139 |
| RP11-367F23.1 | C1orf116 | -0.355439213 | 1.61E-14    |
| RP11-367F23.1 | TM4SF1   | -0.164926089 | 0.000521388 |
| RP11-367F23.1 | SEL1L3   | -0.161144275 | 0.00070175  |
| RP11-367F23.1 | VASN     | -0.469559883 | 1.86E-25    |
| RP11-367F23.1 | NPTXR    | -0.46076137  | 1.86E-24    |
| RP11-367F23.1 | PDE4C    | -0.379660017 | 1.68E-16    |
| RP11-367F23.1 | CDC42EP1 | -0.331480677 | 1.02E-12    |
| RP11-367F23.1 | ENDOD1   | -0.471102708 | 1.23E-25    |
| RP11-367F23.1 | RYR1     | -0.427006456 | 6.99E-21    |
| RP11-367F23.1 | IL1RAP   | -0.334286187 | 6.38E-13    |
| RP11-367F23.1 | SLC35F2  | -0.445924552 | 7.76E-23    |
| RP11-367F23.1 | ISYNA1   | -0.435352065 | 9.94E-22    |
| RP11-367F23.1 | HLA-G    | -0.248454374 | 1.34E-07    |
| RP11-367F23.1 | CDKN2B   | -0.228293964 | 1.34E-06    |
| RP11-367F23.1 | ALDH1A3  | -0.137560487 | 0.003880271 |
| RP11-367F23.1 | CLIP3    | -0.398659302 | 3.56E-18    |
| RP11-367F23.1 | ULBP2    | -0.313333726 | 1.87E-11    |
| RP11-367F23.1 | ETHE1    | -0.432775915 | 1.83E-21    |
| RP11-367F23.1 | XPR1     | -0.234202003 | 6.97E-07    |
| RP11-367F23.1 | SPTBN2   | -0.465885728 | 4.90E-25    |
| RP11-367F23.1 | IVL      | -0.367948432 | 1.60E-15    |
| RP11-367F23.1 | MARCO    | -0.270898171 | 8.02E-09    |

|               |          |              |             |
|---------------|----------|--------------|-------------|
| RP11-367F23.1 | PLXND1   | -0.294921246 | 2.93E-10    |
| RP11-367F23.1 | EMILIN2  | -0.434335477 | 1.26E-21    |
| RP11-367F23.1 | PLAUR    | -0.226365185 | 1.65E-06    |
| RP11-367F23.1 | CDC42EP5 | -0.383131196 | 8.48E-17    |
| RP11-367F23.1 | TRPC5    | -0.473806698 | 5.98E-26    |
| RP11-367F23.1 | TMEM100  | -0.256076158 | 5.30E-08    |
| RP11-367F23.1 | QSOX1    | -0.351102651 | 3.51E-14    |
| RP11-367F23.1 | ARHGAP23 | -0.354574255 | 1.89E-14    |
| RP11-367F23.1 | MDFI     | -0.108749648 | 0.022677528 |
| RP11-367F23.1 | FSTL3    | -0.288593635 | 7.23E-10    |
| RP11-367F23.1 | INF2     | -0.513653582 | 6.33E-31    |
| RP11-367F23.1 | TGFBR1   | -0.455447086 | 7.22E-24    |
| RP11-367F23.1 | TGFBI    | -0.186453014 | 8.49E-05    |
| RP11-367F23.1 | ERBB3    | -0.427425886 | 6.35E-21    |
| RP11-367F23.1 | CCL18    | -0.187065917 | 8.04E-05    |
| RP11-367F23.1 | CCL17    | -0.233818681 | 7.27E-07    |
| RP11-367F23.1 | C16orf45 | -0.358756067 | 8.83E-15    |
| RP11-367F23.1 | PRDM1    | -0.298958661 | 1.63E-10    |
| RP11-367F23.1 | TRIM47   | -0.439432317 | 3.75E-22    |
| RP11-367F23.1 | CNFN     | -0.3514235   | 3.31E-14    |
| RP11-367F23.1 | ARMCX3   | -0.465675233 | 5.18E-25    |
| RP11-367F23.1 | RAMP1    | -0.355809707 | 1.51E-14    |
| RP11-367F23.1 | GABRD    | -0.180234197 | 0.000146638 |
| RP11-367F23.1 | COL13A1  | -0.331848192 | 9.58E-13    |
| RP11-367F23.1 | S100A5   | -0.442065913 | 1.99E-22    |
| RP11-367F23.1 | MISP     | -0.190446741 | 5.93E-05    |
| RP11-367F23.1 | HES6     | -0.380134198 | 1.53E-16    |
| RP11-367F23.1 | PSD3     | -0.472321706 | 8.91E-26    |
| RP11-367F23.1 | DOK7     | -0.339993093 | 2.43E-13    |
| RP11-367F23.1 | ZMAT3    | -0.320619485 | 5.94E-12    |
| RP11-367F23.1 | MFAP2    | -0.316273136 | 1.18E-11    |
| RP11-367F23.1 | TMEM79   | -0.521102602 | 6.26E-32    |
| RP11-367F23.1 | SLC1A5   | -0.384898558 | 5.96E-17    |
| RP11-367F23.1 | BBC3     | -0.33914473  | 2.81E-13    |
| RP11-367F23.1 | HLA-DQB2 | -0.294229478 | 3.24E-10    |
| RP11-367F23.1 | C1QL1    | -0.393360619 | 1.07E-17    |
| RP11-367F23.1 | TMEM215  | -0.301354021 | 1.14E-10    |
| RP11-367F23.1 | PNP      | -0.291808078 | 4.58E-10    |
| RP11-367F23.1 | ARNTL    | -0.245770707 | 1.84E-07    |
| RP11-367F23.1 | CLDN2    | -0.464200367 | 7.62E-25    |
| RP11-367F23.1 | MVP      | -0.471748235 | 1.04E-25    |
| RP11-367F23.1 | LGALS1   | -0.32927885  | 1.46E-12    |
| RP11-367F23.1 | BIRC7    | -0.532706577 | 1.52E-33    |
| RP11-367F23.1 | COL8A1   | -0.442919666 | 1.62E-22    |
| RP11-367F23.1 | PERP     | -0.301146729 | 1.18E-10    |
| RP11-367F23.1 | GJA4     | -0.241540669 | 3.02E-07    |
| RP11-367F23.1 | IGFL2    | -0.285518375 | 1.11E-09    |
| RP11-367F23.1 | DAPK2    | -0.352952708 | 2.52E-14    |
| RP11-367F23.1 | MAMLD1   | -0.390426742 | 1.95E-17    |
| RP11-367F23.1 | ETV5     | -0.433106409 | 1.69E-21    |
| RP11-367F23.1 | RUNX1    | -0.300269573 | 1.34E-10    |

|               |           |              |             |
|---------------|-----------|--------------|-------------|
| RP11-367F23.1 | LONRF2    | -0.307210086 | 4.76E-11    |
| RP11-367F23.1 | SPOCK1    | -0.174544738 | 0.000237905 |
| RP11-367F23.1 | XKRX      | -0.355992117 | 1.46E-14    |
| RP11-367F23.1 | TGFB1     | -0.246421198 | 1.70E-07    |
| RP11-367F23.1 | ERP27     | -0.098574692 | 0.038969292 |
| RP11-367F23.1 | TNFRSF10C | -0.311231331 | 2.58E-11    |
| RP11-367F23.1 | PALM      | -0.401631335 | 1.90E-18    |
| RP11-367F23.1 | TSC22D1   | -0.363897587 | 3.43E-15    |
| RP11-367F23.1 | TGM2      | -0.226020081 | 1.72E-06    |
| RP11-367F23.1 | UBE2QL1   | -0.449873938 | 2.93E-23    |
| RP11-367F23.1 | ECE1      | -0.398207816 | 3.92E-18    |
| RP11-367F23.1 | COL8A2    | -0.289149659 | 6.68E-10    |
| RP11-367F23.1 | HIST3H2A  | -0.376318199 | 3.23E-16    |
| RP11-367F23.1 | TNFRSF21  | -0.194655219 | 4.02E-05    |
| RP11-367F23.1 | SOX4      | -0.245359079 | 1.93E-07    |
| RP11-367F23.1 | ELF3      | -0.27442098  | 5.04E-09    |
| RP11-367F23.1 | TPD52L1   | -0.502401329 | 1.88E-29    |
| RP11-367F23.1 | INHBB     | -0.316070017 | 1.22E-11    |
| RP11-367F23.1 | HPN       | -0.54544993  | 2.15E-35    |
| RP11-367F23.1 | MMP7      | -0.200069759 | 2.41E-05    |
| RP11-367F23.1 | RAB27A    | -0.476718125 | 2.72E-26    |
| RP11-367F23.1 | IGF2BP2   | -0.493323953 | 2.64E-28    |
| RP11-367F23.1 | ITGB4     | -0.228045881 | 1.38E-06    |
| RP11-367F23.1 | PPP1R1B   | -0.493113458 | 2.80E-28    |
| RP11-367F23.1 | NPDC1     | -0.439931178 | 3.33E-22    |
| RP11-367F23.1 | CCL13     | -0.305612973 | 6.06E-11    |
| RP11-367F23.1 | SPINT1    | -0.482362904 | 5.79E-27    |
| RP11-367F23.1 | HEY2      | -0.484932813 | 2.84E-27    |
| RP11-367F23.1 | CST2      | -0.162069352 | 0.000652948 |
| RP11-367F23.1 | ADM       | -0.543358882 | 4.38E-35    |
| RP11-367F23.1 | VSTM2L    | -0.250451663 | 1.05E-07    |
| RP11-367F23.1 | FAM84A    | -0.23262471  | 8.31E-07    |
| RP11-367F23.1 | P4HA2     | -0.52629788  | 1.20E-32    |
| RP11-367F23.1 | LPL       | -0.295749182 | 2.60E-10    |
| RP11-367F23.1 | TMEM173   | -0.361086971 | 5.76E-15    |
| RP11-367F23.1 | DHRS3     | -0.51451088  | 4.87E-31    |
| RP11-367F23.1 | SCN1B     | -0.580142992 | 7.56E-41    |
| RP11-367F23.1 | GLT1D1    | -0.449964433 | 2.86E-23    |
| RP11-367F23.1 | PHYHIP    | -0.512588767 | 8.77E-31    |
| RP11-367F23.1 | BHLHE40   | -0.315985195 | 1.23E-11    |
| RP11-367F23.1 | BID       | -0.467938761 | 2.86E-25    |
| RP11-367F23.1 | POSTN     | -0.114922366 | 0.015995762 |
| RP11-367F23.1 | ITGA3     | -0.41700696  | 6.74E-20    |
| RP11-367F23.1 | RSP04     | -0.36799798  | 1.59E-15    |
| RP11-367F23.1 | ADAMTS9   | -0.422751454 | 1.85E-20    |
| RP11-367F23.1 | ABTB2     | -0.353880502 | 2.14E-14    |
| RP11-367F23.1 | KCNQ3     | -0.334026472 | 6.67E-13    |
| RP11-367F23.1 | ANXA1     | -0.367462382 | 1.76E-15    |
| RP11-367F23.1 | S100A11   | -0.404840246 | 9.62E-19    |
| RP11-367F23.1 | CEACAM6   | -0.228782877 | 1.27E-06    |
| RP11-367F23.1 | IER5L     | -0.457019981 | 4.85E-24    |

|               |            |              |             |
|---------------|------------|--------------|-------------|
| RP11-367F23.1 | KRT80      | -0.293723524 | 3.48E-10    |
| RP11-367F23.1 | CDH6       | -0.18620564  | 8.68E-05    |
| RP11-367F23.1 | UNC5B      | -0.421206927 | 2.63E-20    |
| RP11-367F23.1 | PLEKHN1    | -0.404173443 | 1.11E-18    |
| RP11-367F23.1 | SYTL1      | -0.364048366 | 3.33E-15    |
| RP11-367F23.1 | TMEM163    | -0.161281153 | 0.000694322 |
| RP11-367F23.1 | C4orf48    | -0.284398916 | 1.30E-09    |
| RP11-367F23.1 | B3GNT7     | -0.456762536 | 5.17E-24    |
| RP11-367F23.1 | BAIAP3     | -0.465028713 | 6.14E-25    |
| RP11-367F23.1 | PHLDA2     | -0.415536191 | 9.35E-20    |
| RP11-367F23.1 | GAP43      | -0.324866451 | 3.01E-12    |
| RP11-367F23.1 | S100A1     | -0.476685785 | 2.75E-26    |
| RP11-367F23.1 | PTPRE      | -0.40437103  | 1.06E-18    |
| RP11-367F23.1 | CCND1      | -0.347625799 | 6.48E-14    |
| RP11-367F23.1 | ST6GALNAC5 | -0.245366345 | 1.93E-07    |
| RP11-367F23.1 | KRT17      | -0.091094183 | 0.056499845 |
| RP11-367F23.1 | HPCAL4     | -0.493005232 | 2.89E-28    |
| RP11-367F23.1 | GABBR2     | -0.354423051 | 1.94E-14    |
| RP11-367F23.1 | DIRAS3     | -0.456265235 | 5.87E-24    |
| RP11-367F23.1 | SERINC2    | -0.499529295 | 4.37E-29    |
| RP11-367F23.1 | PTCHD4     | -0.170322359 | 0.000337464 |
| RP11-367F23.1 | EPS8       | -0.456182541 | 6.00E-24    |
| RP11-367F23.1 | LY6E       | -0.49818661  | 6.47E-29    |
| RP11-367F23.1 | UPP1       | -0.386496701 | 4.33E-17    |
| RP11-367F23.1 | AHNAK2     | -0.362538732 | 4.41E-15    |
| RP11-367F23.1 | PLXNC1     | -0.511899695 | 1.08E-30    |
| RP11-367F23.1 | TNC        | -0.3023914   | 9.81E-11    |
| RP11-367F23.1 | DUSP4      | -0.4307182   | 2.96E-21    |
| RP11-367F23.1 | NRCAM      | -0.406713423 | 6.43E-19    |
| RP11-367F23.1 | NRP2       | -0.43661163  | 7.37E-22    |
| RP11-367F23.1 | CTSC       | -0.397994626 | 4.09E-18    |
| RP11-367F23.1 | AMIGO2     | -0.313683227 | 1.77E-11    |
| RP11-367F23.1 | NAB2       | -0.494876707 | 1.69E-28    |
| RP11-367F23.1 | TBC1D2     | -0.318755528 | 7.98E-12    |
| RP11-367F23.1 | PHLDA3     | -0.393111402 | 1.13E-17    |
| RP11-367F23.1 | PTP4A3     | -0.42968218  | 3.76E-21    |
| RP11-367F23.1 | CRABP2     | -0.444459086 | 1.11E-22    |
| RP11-367F23.1 | GOS2       | -0.465994095 | 4.77E-25    |
| RP11-367F23.1 | S100A6     | -0.421281536 | 2.58E-20    |
| RP11-367F23.1 | FOXQ1      | -0.249201318 | 1.22E-07    |
| RP11-367F23.1 | LRG1       | -0.402832602 | 1.48E-18    |
| RP11-367F23.1 | LAMP5      | -0.183888778 | 0.000106622 |
| RP11-367F23.1 | ALDH3B1    | -0.414537476 | 1.17E-19    |
| RP11-367F23.1 | CDH2       | -0.108103696 | 0.023499911 |
| RP11-367F23.1 | SCG5       | -0.377467836 | 2.58E-16    |
| RP11-367F23.1 | ZCCHC16    | -0.508971068 | 2.63E-30    |
| RP11-367F23.1 | GRB7       | -0.40299402  | 1.43E-18    |
| RP11-367F23.1 | TIAM1      | -0.186849464 | 8.20E-05    |
| RP11-367F23.1 | FXYD5      | -0.434988522 | 1.08E-21    |
| RP11-367F23.1 | CLDN9      | -0.364242691 | 3.21E-15    |
| RP11-367F23.1 | FAM43A     | -0.520601187 | 7.33E-32    |

|               |         |              |             |
|---------------|---------|--------------|-------------|
| RP11-367F23.1 | CHST2   | -0.321022602 | 5.57E-12    |
| RP11-367F23.1 | HMG2    | -0.484403881 | 3.29E-27    |
| RP11-367F23.1 | GALNT7  | -0.601831334 | 1.33E-44    |
| RP11-367F23.1 | CBLN1   | -0.267010541 | 1.33E-08    |
| RP11-367F23.1 | STRA6   | -0.379784413 | 1.64E-16    |
| RP11-367F23.1 | MUC21   | -0.470124393 | 1.60E-25    |
| RP11-367F23.1 | PRR36   | -0.528494317 | 5.95E-33    |
| RP11-367F23.1 | NFE2L3  | -0.26584587  | 1.55E-08    |
| RP11-367F23.1 | NR1D1   | -0.395625566 | 6.70E-18    |
| RP11-367F23.1 | MUC1    | -0.355129854 | 1.71E-14    |
| RP11-367F23.1 | NAT8L   | -0.437918995 | 5.40E-22    |
| RP11-367F23.1 | APOC1   | -0.313374009 | 1.85E-11    |
| RP11-367F23.1 | EVA1A   | -0.277054576 | 3.54E-09    |
| RP11-367F23.1 | ENTPD1  | -0.316762635 | 1.09E-11    |
| RP11-367F23.1 | COL1A1  | -0.205291732 | 1.46E-05    |
| RP11-367F23.1 | FNDC4   | -0.285296923 | 1.15E-09    |
| RP11-367F23.1 | FRMD3   | -0.363828509 | 3.47E-15    |
| RP11-367F23.1 | SHROOM4 | -0.440499401 | 2.90E-22    |
| RP11-367F23.1 | NELL2   | -0.402659554 | 1.53E-18    |
| RP11-367F23.1 | EPHB3   | -0.468091242 | 2.75E-25    |
| RP11-367F23.1 | TMC6    | -0.551911156 | 2.32E-36    |
| RP11-367F23.1 | NOD1    | -0.434264698 | 1.29E-21    |
| RP11-367F23.1 | GGCT    | -0.53116919  | 2.50E-33    |
| RP11-367F23.1 | ICAM1   | -0.366702246 | 2.03E-15    |
| RP11-367F23.1 | PRSS23  | -0.341913645 | 1.75E-13    |
| RP11-367F23.1 | CFI     | -0.322109119 | 4.68E-12    |
| RP11-367F23.1 | CD55    | -0.254860707 | 6.15E-08    |
| RP11-367F23.1 | RASD2   | -0.331018836 | 1.10E-12    |
| RP11-367F23.1 | KLK11   | -0.332558906 | 8.51E-13    |
| RP11-367F23.1 | ICAM5   | -0.402581966 | 1.56E-18    |
| RP11-367F23.1 | ADORA1  | -0.560370097 | 1.16E-37    |
| RP11-367F23.1 | ITGA2   | -0.227934818 | 1.39E-06    |
| RP11-367F23.1 | ABCC3   | -0.39155113  | 1.55E-17    |
| RP11-367F23.1 | MFGE8   | -0.439111326 | 4.06E-22    |
| RP11-367F23.1 | STK32A  | -0.338805442 | 2.98E-13    |
| RP11-367F23.1 | CYSLTR2 | -0.233256904 | 7.75E-07    |
| RP11-367F23.1 | LAD1    | -0.535571851 | 5.91E-34    |
| RP11-367F23.1 | MGAT3   | -0.2209909   | 2.94E-06    |
| RP11-367F23.1 | IGFBP6  | -0.429803881 | 3.66E-21    |
| RP11-367F23.1 | CYP2S1  | -0.313783368 | 1.74E-11    |
| RP11-367F23.1 | KCNJ2   | -0.445993826 | 7.63E-23    |
| RP11-367F23.1 | FAM20A  | -0.369110454 | 1.29E-15    |
| RP11-367F23.1 | TGFA    | -0.536581914 | 4.24E-34    |
| RP11-367F23.1 | MXRA8   | -0.355649141 | 1.55E-14    |
| RP11-367F23.1 | C8orf4  | -0.154706878 | 0.001146662 |
| RP11-367F23.1 | CLDN10  | -0.352743969 | 2.62E-14    |
| RP11-367F23.1 | PDE5A   | -0.53823339  | 2.45E-34    |
| RP11-367F23.1 | APOE    | -0.35075925  | 3.73E-14    |
| RP11-367F23.1 | SPOCK2  | -0.244166748 | 2.22E-07    |
| RP11-367F23.1 | TENM1   | -0.465894805 | 4.89E-25    |
| RP11-367F23.1 | SLIT1   | -0.39343452  | 1.05E-17    |

|               |           |              |             |
|---------------|-----------|--------------|-------------|
| RP11-367F23.1 | CXCL14    | -0.084911536 | 0.075529966 |
| RP11-367F23.1 | ECM1      | -0.297041513 | 2.16E-10    |
| RP11-367F23.1 | DUSP5     | -0.305016628 | 6.63E-11    |
| RP11-367F23.1 | SEZ6L2    | -0.417078023 | 6.64E-20    |
| RP11-367F23.1 | THRSP     | -0.470150233 | 1.59E-25    |
| RP11-367F23.1 | C19orf33  | -0.312261678 | 2.20E-11    |
| RP11-367F23.1 | MPZL2     | -0.414579745 | 1.16E-19    |
| RP11-367F23.1 | CTSH      | -0.609244326 | 5.93E-46    |
| RP11-367F23.1 | CYP1B1    | -0.529950192 | 3.72E-33    |
| RP11-367F23.1 | ALOX5     | -0.287875059 | 8.00E-10    |
| RP11-367F23.1 | SYTL5     | -0.324397765 | 3.24E-12    |
| RP11-367F23.1 | TNFRSF12A | -0.337416091 | 3.77E-13    |
| RP11-367F23.1 | DUSP6     | -0.267159618 | 1.31E-08    |
| RP11-367F23.1 | ALOX15B   | -0.375773381 | 3.59E-16    |
| RP11-367F23.1 | SDC4      | -0.4724044   | 8.72E-26    |
| RP11-367F23.1 | MDK       | -0.361066971 | 5.78E-15    |
| RP11-367F23.1 | KRT19     | -0.319341197 | 7.28E-12    |
| RP11-367F23.1 | MET       | -0.463193834 | 9.90E-25    |
| RP11-367F23.1 | TESC      | -0.433963707 | 1.38E-21    |
| RP11-367F23.1 | CXCL17    | -0.468838062 | 2.25E-25    |
| RP11-367F23.1 | NPC2      | -0.577671664 | 1.95E-40    |
| RP11-367F23.1 | COMP      | -0.24003061  | 3.59E-07    |
| RP11-367F23.1 | TUSC3     | -0.358919186 | 8.58E-15    |
| RP11-367F23.1 | TMPRSS4   | -0.296074286 | 2.48E-10    |
| RP11-367F23.1 | LGALS3    | -0.512044658 | 1.04E-30    |
| RP11-367F23.1 | CRLF1     | -0.10880596  | 0.022607031 |
| RP11-367F23.1 | CTXN1     | -0.309777867 | 3.22E-11    |
| RP11-367F23.1 | PCSK1N    | -0.138806293 | 0.003566675 |
| RP11-367F23.1 | NMU       | -0.366255351 | 2.21E-15    |
| RP11-367F23.1 | GALE      | -0.616755756 | 2.33E-47    |
| RP11-367F23.1 | PCSK2     | -0.168000675 | 0.00040758  |
| RP11-367F23.1 | GJB3      | -0.484129273 | 3.55E-27    |
| RP11-367F23.1 | SLPI      | -0.209665315 | 9.43E-06    |
| RP11-367F23.1 | AGR2      | -0.106647395 | 0.025449121 |
| RP11-367F23.1 | MRC2      | -0.324984983 | 2.95E-12    |
| RP11-367F23.1 | GOLT1A    | -0.564615312 | 2.51E-38    |
| RP11-367F23.1 | SLC27A6   | -0.214115359 | 6.01E-06    |
| RP11-367F23.1 | KCNN4     | -0.382031914 | 1.05E-16    |
| RP11-367F23.1 | ETV4      | -0.341215861 | 1.97E-13    |
| RP11-367F23.1 | SYT12     | -0.51528208  | 3.84E-31    |
| RP11-367F23.1 | PVRL4     | -0.474155592 | 5.45E-26    |
| RP11-367F23.1 | PLCD3     | -0.491841553 | 4.03E-28    |
| RP11-367F23.1 | PLAU      | -0.375203172 | 4.01E-16    |
| RP11-367F23.1 | LRRK2     | -0.470205978 | 1.57E-25    |
| RP11-367F23.1 | SFN       | -0.29601457  | 2.50E-10    |
| RP11-367F23.1 | LPAR5     | -0.522789539 | 3.68E-32    |
| RP11-367F23.1 | NGEF      | -0.425386469 | 1.01E-20    |
| RP11-367F23.1 | DTX4      | -0.406489879 | 6.75E-19    |
| RP11-367F23.1 | CST6      | -0.373116522 | 6.00E-16    |
| RP11-367F23.1 | QPCT      | -0.517087314 | 2.19E-31    |
| RP11-367F23.1 | TIMP1     | -0.525379873 | 1.61E-32    |



|               |          |              |             |
|---------------|----------|--------------|-------------|
| RP11-367F23.1 | CAMK2N1  | -0.506986116 | 4.79E-30    |
| RP11-367F23.1 | KLHDC8A  | -0.234322853 | 6.87E-07    |
| RP11-367F23.1 | PDLIM4   | -0.491529499 | 4.41E-28    |
| RP11-367F23.1 | SCEL     | -0.328843818 | 1.57E-12    |
| RP11-367F23.1 | LCN2     | -0.402301684 | 1.65E-18    |
| RP11-367F23.1 | PROS1    | -0.498087746 | 6.66E-29    |
| RP11-367F23.1 | GABRB2   | -0.431969822 | 2.21E-21    |
| RP11-367F23.1 | TMPRSS6  | -0.371841355 | 7.66E-16    |
| RP11-367F23.1 | KLK7     | -0.39349601  | 1.04E-17    |
| RP11-367F23.1 | PDZK1IP1 | -0.453457456 | 1.19E-23    |
| RP11-367F23.1 | CDH3     | -0.38329162  | 8.21E-17    |
| RP11-367F23.1 | LRP4     | -0.437919279 | 5.39E-22    |
| RP11-367F23.1 | IGSF1    | -0.150142091 | 0.001606313 |
| RP11-367F23.1 | B3GNT3   | -0.335743764 | 5.00E-13    |
| RP11-367F23.1 | CLDN1    | -0.344266393 | 1.17E-13    |
| RP11-367F23.1 | GDF15    | -0.409690138 | 3.38E-19    |
| RP11-367F23.1 | ARHGAP36 | -0.131285918 | 0.005872159 |
| RP11-367F23.1 | LAMB3    | -0.343553916 | 1.32E-13    |
| RP11-367F23.1 | KLK10    | -0.422552023 | 1.94E-20    |
| RP11-367F23.1 | DPP4     | -0.40329884  | 1.34E-18    |
| RP11-367F23.1 | METTL7B  | -0.586533155 | 6.33E-42    |
| RP11-367F23.1 | LIPH     | -0.463478229 | 9.20E-25    |
| RP11-367F23.1 | CLDN16   | -0.417942555 | 5.47E-20    |
| RP11-367F23.1 | CHI3L1   | -0.56102995  | 9.18E-38    |
| RP11-367F23.1 | SLC22A31 | -0.469892742 | 1.70E-25    |
| RP11-367F23.1 | TACSTD2  | -0.384729765 | 6.17E-17    |
| RP11-367F23.1 | SFTPB    | -0.280540932 | 2.21E-09    |
| RP11-367F23.1 | RXRG     | -0.537161342 | 3.50E-34    |
| RP11-367F23.1 | DCSTAMP  | -0.480853583 | 8.79E-27    |
| RP11-367F23.1 | CITED1   | -0.609893398 | 4.50E-46    |
| RP11-367F23.1 | SERPINA1 | -0.537992825 | 2.65E-34    |
| RP11-367F23.1 | PRR15    | -0.452480016 | 1.53E-23    |
| RP11-367F23.1 | SLC34A2  | -0.473438009 | 6.61E-26    |
| RP11-367F23.1 | FN1      | -0.419858853 | 3.56E-20    |
| RP11-367F23.1 | ZCCHC12  | -0.358312666 | 9.58E-15    |
| AC131097.4    | TFF3     | 0.628692933  | 1.14E-49    |
| AC131097.4    | CCL21    | 0.338616551  | 3.07E-13    |
| AC131097.4    | TPO      | 0.606246225  | 2.11E-45    |
| AC131097.4    | MT1G     | 0.626787836  | 2.70E-49    |
| AC131097.4    | DIO1     | 0.578570731  | 1.38E-40    |
| AC131097.4    | DPT      | 0.283202568  | 1.53E-09    |
| AC131097.4    | CDH16    | 0.549874996  | 4.70E-36    |
| AC131097.4    | CRABP1   | 0.562778962  | 4.88E-38    |
| AC131097.4    | SLC26A7  | 0.566555424  | 1.24E-38    |
| AC131097.4    | MT1H     | 0.573553294  | 9.22E-40    |
| AC131097.4    | SLC26A4  | 0.556174375  | 5.18E-37    |
| AC131097.4    | SLC5A8   | 0.599561344  | 3.39E-44    |
| AC131097.4    | PKHD1L1  | 0.53099563   | 2.65E-33    |
| AC131097.4    | TFCP2L1  | 0.571580956  | 1.93E-39    |
| AC131097.4    | WSCD2    | 0.576175604  | 3.43E-40    |
| AC131097.4    | IPCEF1   | 0.551558897  | 2.62E-36    |

|            |           |             |             |
|------------|-----------|-------------|-------------|
| AC131097.4 | SLC5A5    | 0.48987012  | 7.07E-28    |
| AC131097.4 | MT1F      | 0.646784649 | 2.24E-53    |
| AC131097.4 | FOSB      | 0.34314553  | 1.41E-13    |
| AC131097.4 | SEMA3D    | 0.525485623 | 1.56E-32    |
| AC131097.4 | BMP8A     | 0.496872562 | 9.48E-29    |
| AC131097.4 | MATN2     | 0.57294487  | 1.16E-39    |
| AC131097.4 | PLA2R1    | 0.515814667 | 3.25E-31    |
| AC131097.4 | COL23A1   | 0.586409973 | 6.65E-42    |
| AC131097.4 | HGD       | 0.64381754  | 9.46E-53    |
| AC131097.4 | TCEAL2    | 0.499164734 | 4.86E-29    |
| AC131097.4 | CHRD1     | 0.292536089 | 4.13E-10    |
| AC131097.4 | TNFRSF11B | 0.458459296 | 3.36E-24    |
| AC131097.4 | FAM167A   | 0.605346192 | 3.07E-45    |
| AC131097.4 | KIT       | 0.49038461  | 6.11E-28    |
| AC131097.4 | SLC4A4    | 0.591062258 | 1.06E-42    |
| AC131097.4 | SMOC2     | 0.349418668 | 4.73E-14    |
| AC131097.4 | FHL1      | 0.645885183 | 3.48E-53    |
| AC131097.4 | OTOS      | 0.606605287 | 1.81E-45    |
| AC131097.4 | IGFBPL1   | 0.565404986 | 1.88E-38    |
| AC131097.4 | HBB       | 0.316794944 | 1.09E-11    |
| AC131097.4 | BEX1      | 0.5208241   | 6.83E-32    |
| AC131097.4 | FABP4     | 0.499711448 | 4.14E-29    |
| AC131097.4 | LMOD1     | 0.548050251 | 8.82E-36    |
| AC131097.4 | SOD3      | 0.595021807 | 2.16E-43    |
| AC131097.4 | TMEM171   | 0.547744732 | 9.80E-36    |
| AC131097.4 | PI16      | 0.343986558 | 1.22E-13    |
| AC131097.4 | ZMAT4     | 0.621005473 | 3.60E-48    |
| AC131097.4 | MFAP4     | 0.264127034 | 1.93E-08    |
| AC131097.4 | CWH43     | 0.516454091 | 2.67E-31    |
| AC131097.4 | SPX       | 0.610280593 | 3.82E-46    |
| AC131097.4 | APOD      | 0.1591829   | 0.000816591 |
| AC131097.4 | DPP6      | 0.547847848 | 9.46E-36    |
| AC131097.4 | MMRN1     | 0.349623411 | 4.56E-14    |
| AC131097.4 | WDR72     | 0.462926411 | 1.06E-24    |
| AC131097.4 | MPPED2    | 0.629296312 | 8.62E-50    |
| AC131097.4 | PAPSS2    | 0.363371836 | 3.78E-15    |
| AC131097.4 | DCN       | 0.08891609  | 0.062691151 |
| AC131097.4 | SORBS2    | 0.628568683 | 1.20E-49    |
| AC131097.4 | EGR2      | 0.296308366 | 2.40E-10    |
| AC131097.4 | EDN3      | 0.476888621 | 2.60E-26    |
| AC131097.4 | DIO2      | 0.535045128 | 7.04E-34    |
| AC131097.4 | ITPR1     | 0.559333319 | 1.69E-37    |
| AC131097.4 | CFD       | 0.307700294 | 4.42E-11    |
| AC131097.4 | CPXM1     | 0.401431925 | 1.99E-18    |
| AC131097.4 | ELMO1     | 0.57557022  | 4.32E-40    |
| AC131097.4 | GPC3      | 0.415373477 | 9.70E-20    |
| AC131097.4 | MYOC      | 0.227207778 | 1.51E-06    |
| AC131097.4 | DEPTOR    | 0.554942229 | 8.01E-37    |
| AC131097.4 | DGKI      | 0.511515771 | 1.22E-30    |
| AC131097.4 | CARTPT    | 0.52685039  | 1.01E-32    |
| AC131097.4 | IYD       | 0.409276628 | 3.70E-19    |

|            |            |             |             |
|------------|------------|-------------|-------------|
| AC131097.4 | LYVE1      | 0.322138051 | 4.66E-12    |
| AC131097.4 | CLCNKB     | 0.633535636 | 1.22E-50    |
| AC131097.4 | NCAM1      | 0.439911926 | 3.35E-22    |
| AC131097.4 | HBA2       | 0.316016892 | 1.23E-11    |
| AC131097.4 | GLT8D2     | 0.455710051 | 6.76E-24    |
| AC131097.4 | OGDHL      | 0.521358616 | 5.77E-32    |
| AC131097.4 | LIFR       | 0.424997664 | 1.11E-20    |
| AC131097.4 | CSGALNACT1 | 0.398160645 | 3.95E-18    |
| AC131097.4 | RAP1GAP    | 0.550134985 | 4.29E-36    |
| AC131097.4 | COL9A3     | 0.563627818 | 3.59E-38    |
| AC131097.4 | FBLN1      | 0.167219935 | 0.000434056 |
| AC131097.4 | EFEMP1     | 0.370365724 | 1.01E-15    |
| AC131097.4 | AOX1       | 0.472099302 | 9.46E-26    |
| AC131097.4 | GRIN2C     | 0.586924278 | 5.43E-42    |
| AC131097.4 | C11orf74   | 0.638842928 | 1.02E-51    |
| AC131097.4 | PPARGC1A   | 0.570066765 | 3.39E-39    |
| AC131097.4 | ANGPTL1    | 0.516629384 | 2.53E-31    |
| AC131097.4 | SCARA5     | 0.251456997 | 9.31E-08    |
| AC131097.4 | LTF        | 0.472925917 | 7.58E-26    |
| AC131097.4 | CA4        | 0.55876191  | 2.07E-37    |
| AC131097.4 | TG         | 0.539674578 | 1.51E-34    |
| AC131097.4 | FCGBP      | 0.607183064 | 1.42E-45    |
| AC131097.4 | PBX4       | 0.589391691 | 2.05E-42    |
| AC131097.4 | CYR61      | 0.376166045 | 3.33E-16    |
| AC131097.4 | FOS        | 0.366430784 | 2.13E-15    |
| AC131097.4 | KHDRBS2    | 0.520987994 | 6.49E-32    |
| AC131097.4 | MUM1L1     | 0.466883265 | 3.77E-25    |
| AC131097.4 | RGS16      | 0.501176705 | 2.69E-29    |
| AC131097.4 | MT1M       | 0.536995542 | 3.69E-34    |
| AC131097.4 | LRP2       | 0.511711224 | 1.15E-30    |
| AC131097.4 | MAFB       | 0.45251437  | 1.51E-23    |
| AC131097.4 | KCNK2      | 0.457875845 | 3.90E-24    |
| AC131097.4 | TBC1D4     | 0.470145538 | 1.59E-25    |
| AC131097.4 | MIOX       | 0.620814601 | 3.92E-48    |
| AC131097.4 | TPPP       | 0.534044178 | 9.78E-34    |
| AC131097.4 | FMOD       | 0.513728301 | 6.19E-31    |
| AC131097.4 | CITED2     | 0.375822372 | 3.56E-16    |
| AC131097.4 | RGS8       | 0.570245974 | 3.17E-39    |
| AC131097.4 | ABI3BP     | 0.257343776 | 4.53E-08    |
| AC131097.4 | ADH1B      | 0.308498604 | 3.92E-11    |
| AC131097.4 | OGN        | 0.195371472 | 3.76E-05    |
| AC131097.4 | NR4A1      | 0.298544016 | 1.73E-10    |
| AC131097.4 | FOXJ1      | 0.586300209 | 6.94E-42    |
| AC131097.4 | ALDH1A1    | 0.581210193 | 5.02E-41    |
| AC131097.4 | OCA2       | 0.504096417 | 1.14E-29    |
| AC131097.4 | TMEM139    | 0.391347813 | 1.62E-17    |
| AC131097.4 | ARHGAP24   | 0.555824673 | 5.87E-37    |
| AC131097.4 | SLC25A15   | 0.459597616 | 2.51E-24    |
| AC131097.4 | DES        | 0.243477138 | 2.41E-07    |
| AC131097.4 | GDF10      | 0.421019088 | 2.74E-20    |
| AC131097.4 | KIAA1324   | 0.50415353  | 1.12E-29    |

|            |          |             |             |
|------------|----------|-------------|-------------|
| AC131097.4 | JUN      | 0.382285573 | 1.00E-16    |
| AC131097.4 | C7       | 0.092733375 | 0.052182407 |
| AC131097.4 | LGI3     | 0.646545864 | 2.52E-53    |
| AC131097.4 | CDON     | 0.606822087 | 1.65E-45    |
| AC131097.4 | BCL2     | 0.535278239 | 6.52E-34    |
| AC131097.4 | HLF      | 0.597628079 | 7.48E-44    |
| AC131097.4 | EGR1     | 0.37222373  | 7.12E-16    |
| AC131097.4 | IP6K3    | 0.464308906 | 7.41E-25    |
| AC131097.4 | SCUBE3   | 0.441769719 | 2.14E-22    |
| AC131097.4 | PKNOX2   | 0.51658584  | 2.56E-31    |
| AC131097.4 | SMAD9    | 0.401388594 | 2.00E-18    |
| AC131097.4 | IQGAP2   | 0.520904664 | 6.66E-32    |
| AC131097.4 | GNA14    | 0.628813283 | 1.07E-49    |
| AC131097.4 | LAYN     | 0.506335565 | 5.82E-30    |
| AC131097.4 | AVPR1A   | 0.500676159 | 3.12E-29    |
| AC131097.4 | PDLIM3   | 0.423557938 | 1.54E-20    |
| AC131097.4 | GPM6A    | 0.499513655 | 4.39E-29    |
| AC131097.4 | SDPR     | 0.425317367 | 1.03E-20    |
| AC131097.4 | CRYAB    | 0.373620692 | 5.44E-16    |
| AC131097.4 | FOXA2    | 0.470518797 | 1.44E-25    |
| AC131097.4 | C8orf88  | 0.437245088 | 6.34E-22    |
| AC131097.4 | ISM1     | 0.472461468 | 8.59E-26    |
| AC131097.4 | BMP2     | 0.327116635 | 2.09E-12    |
| AC131097.4 | ID4      | 0.545050024 | 2.46E-35    |
| AC131097.4 | NUPR1    | 0.416960558 | 6.81E-20    |
| AC131097.4 | SERTM1   | 0.465085585 | 6.05E-25    |
| AC131097.4 | IRS1     | 0.535969983 | 5.19E-34    |
| AC131097.4 | FIBIN    | 0.222212924 | 2.58E-06    |
| AC131097.4 | PODN     | 0.160010666 | 0.000766154 |
| AC131097.4 | TDRD9    | 0.446840639 | 6.20E-23    |
| AC131097.4 | EPHA3    | 0.318728976 | 8.02E-12    |
| AC131097.4 | AIF1L    | 0.430979042 | 2.78E-21    |
| AC131097.4 | EBF4     | 0.630758165 | 4.41E-50    |
| AC131097.4 | ADM2     | 0.527356731 | 8.58E-33    |
| AC131097.4 | GSTM3    | 0.612886653 | 1.25E-46    |
| AC131097.4 | HSD17B6  | 0.321884374 | 4.86E-12    |
| AC131097.4 | AGR3     | 0.428600349 | 4.84E-21    |
| AC131097.4 | EPHB1    | 0.425054045 | 1.09E-20    |
| AC131097.4 | TMOD1    | 0.430602178 | 3.04E-21    |
| AC131097.4 | WASF3    | 0.546432235 | 1.54E-35    |
| AC131097.4 | SELV     | 0.624468064 | 7.68E-49    |
| AC131097.4 | ENPP1    | 0.322342085 | 4.51E-12    |
| AC131097.4 | SYNE1    | 0.553657834 | 1.26E-36    |
| AC131097.4 | PLCH1    | 0.553522714 | 1.32E-36    |
| AC131097.4 | CCDC146  | 0.541608255 | 7.91E-35    |
| AC131097.4 | SLC16A2  | 0.529247856 | 4.66E-33    |
| AC131097.4 | IER2     | 0.50692788  | 4.87E-30    |
| AC131097.4 | KCNAB1   | 0.555699998 | 6.13E-37    |
| AC131097.4 | SYNDIG1  | 0.547038875 | 1.25E-35    |
| AC131097.4 | C16orf89 | 0.624895293 | 6.34E-49    |
| AC131097.4 | CTGF     | 0.266900747 | 1.35E-08    |

|            |          |              |             |
|------------|----------|--------------|-------------|
| AC131097.4 | NR4A3    | 0.161658327  | 0.00067423  |
| AC131097.4 | KIAA1456 | 0.485320923  | 2.55E-27    |
| AC131097.4 | AQP4     | 0.457713512  | 4.06E-24    |
| AC131097.4 | RNF150   | 0.537746645  | 2.88E-34    |
| AC131097.4 | C1S      | 0.034184012  | 0.474979041 |
| AC131097.4 | PFKFB2   | 0.438773534  | 4.40E-22    |
| AC131097.4 | PROX1    | 0.448529504  | 4.08E-23    |
| AC131097.4 | TCF7L1   | 0.608820584  | 7.10E-46    |
| AC131097.4 | HSPB6    | 0.321385175  | 5.26E-12    |
| AC131097.4 | FHDC1    | 0.384639445  | 6.28E-17    |
| AC131097.4 | PRR15L   | 0.473910698  | 5.82E-26    |
| AC131097.4 | SLC1A1   | 0.397614073  | 4.43E-18    |
| AC131097.4 | BTBD11   | 0.618037782  | 1.33E-47    |
| AC131097.4 | TRIM58   | 0.412736836  | 1.74E-19    |
| AC131097.4 | LRIG1    | 0.440131916  | 3.17E-22    |
| AC131097.4 | ROR2     | 0.352243939  | 2.86E-14    |
| AC131097.4 | GPR125   | 0.506108411  | 6.23E-30    |
| AC131097.4 | FLRT1    | 0.650383787  | 3.84E-54    |
| AC131097.4 | PGF      | 0.625943333  | 3.95E-49    |
| AC131097.4 | DUSP1    | 0.32280391   | 4.19E-12    |
| AC131097.4 | PLA2G7   | 0.316108236  | 1.21E-11    |
| AC131097.4 | PLSCR4   | 0.315060479  | 1.43E-11    |
| AC131097.4 | FAM46B   | 0.447930309  | 4.74E-23    |
| AC131097.4 | GLDC     | 0.506058201  | 6.32E-30    |
| AC131097.4 | ZBTB16   | 0.362181532  | 4.71E-15    |
| AC131097.4 | OMD      | 0.120939235  | 0.011211115 |
| AC131097.4 | HSD11B2  | 0.575692129  | 4.12E-40    |
| AC131097.4 | FGL2     | 0.126471591  | 0.007978469 |
| AC131097.4 | CLCNKA   | 0.677829137  | 2.36E-60    |
| AC131097.4 | GATM     | 0.417483869  | 6.06E-20    |
| AC131097.4 | TNS3     | 0.341740412  | 1.80E-13    |
| AC131097.4 | TOB1     | 0.368796641  | 1.37E-15    |
| AC131097.4 | MARC2    | 0.573755261  | 8.55E-40    |
| AC131097.4 | LRRC2    | 0.468766164  | 2.30E-25    |
| AC131097.4 | SORD     | 0.312223932  | 2.21E-11    |
| AC131097.4 | RIMS4    | 0.514474298  | 4.92E-31    |
| AC131097.4 | SLC29A4  | 0.587053634  | 5.16E-42    |
| AC131097.4 | SLC39A14 | 0.471612923  | 1.08E-25    |
| AC131097.4 | FAXDC2   | 0.544627417  | 2.85E-35    |
| AC131097.4 | HSPB8    | 0.405015603  | 9.27E-19    |
| AC131097.4 | CCL19    | -0.003797396 | 0.936764008 |
| AC131097.4 | KCNIP3   | 0.63320565   | 1.43E-50    |
| AC131097.4 | CGNL1    | 0.534852158  | 7.50E-34    |
| AC131097.4 | ATF3     | 0.144625148  | 0.002384871 |
| AC131097.4 | SGCD     | 0.393358508  | 1.07E-17    |
| AC131097.4 | STARD13  | 0.466025216  | 4.73E-25    |
| AC131097.4 | LDHD     | 0.608666406  | 7.58E-46    |
| AC131097.4 | RCAN1    | 0.356935867  | 1.23E-14    |
| AC131097.4 | ID3      | 0.492931665  | 2.95E-28    |
| AC131097.4 | SYTL3    | 0.525889275  | 1.37E-32    |
| AC131097.4 | MT1E     | 0.490189157  | 6.46E-28    |

|            |          |             |             |
|------------|----------|-------------|-------------|
| AC131097.4 | CAMK1D   | 0.469749172 | 1.77E-25    |
| AC131097.4 | PRKCQ    | 0.494279125 | 2.01E-28    |
| AC131097.4 | NUAK2    | 0.323062977 | 4.02E-12    |
| AC131097.4 | LIPG     | 0.49384581  | 2.27E-28    |
| AC131097.4 | SLC25A25 | 0.312171381 | 2.23E-11    |
| AC131097.4 | PRKX     | 0.241062196 | 3.19E-07    |
| AC131097.4 | SRPX     | 0.236865353 | 5.16E-07    |
| AC131097.4 | FAM189A1 | 0.551792149 | 2.41E-36    |
| AC131097.4 | PLEKHH1  | 0.437831305 | 5.51E-22    |
| AC131097.4 | WNT11    | 0.503790424 | 1.24E-29    |
| AC131097.4 | SNAI1    | 0.398108378 | 4.00E-18    |
| AC131097.4 | FDCSP    | 0.04471909  | 0.349909273 |
| AC131097.4 | MT1X     | 0.475377799 | 3.92E-26    |
| AC131097.4 | ACACB    | 0.577825301 | 1.83E-40    |
| AC131097.4 | ARC      | 0.229578144 | 1.16E-06    |
| AC131097.4 | KLK4     | 0.275303318 | 4.48E-09    |
| AC131097.4 | ZFPM2    | 0.323646853 | 3.66E-12    |
| AC131097.4 | AKAP12   | 0.318366154 | 8.49E-12    |
| AC131097.4 | GJB6     | 0.375226919 | 3.99E-16    |
| AC131097.4 | ERO1LB   | 0.508213074 | 3.31E-30    |
| AC131097.4 | DNALI1   | 0.52579857  | 1.41E-32    |
| AC131097.4 | HKDC1    | 0.399181808 | 3.19E-18    |
| AC131097.4 | ZFP36L2  | 0.396662553 | 5.40E-18    |
| AC131097.4 | CAPSL    | 0.622570703 | 1.79E-48    |
| AC131097.4 | CYP7B1   | 0.398611265 | 3.60E-18    |
| AC131097.4 | CPQ      | 0.513076272 | 7.56E-31    |
| AC131097.4 | RPS6KA6  | 0.502163135 | 2.01E-29    |
| AC131097.4 | TLE1     | 0.472558627 | 8.37E-26    |
| AC131097.4 | TP53INP2 | 0.582738568 | 2.78E-41    |
| AC131097.4 | KATNAL2  | 0.655487968 | 3.01E-55    |
| AC131097.4 | SGPP2    | 0.148876103 | 0.001760867 |
| AC131097.4 | CTH      | 0.462289346 | 1.25E-24    |
| AC131097.4 | KIF12    | 0.454628465 | 8.89E-24    |
| AC131097.4 | TMEM220  | 0.558304781 | 2.43E-37    |
| AC131097.4 | CENPJ    | 0.400069004 | 2.65E-18    |
| AC131097.4 | FAM155B  | 0.482067941 | 6.29E-27    |
| AC131097.4 | WFS1     | 0.617220724 | 1.90E-47    |
| AC131097.4 | SELENBP1 | 0.52347569  | 2.96E-32    |
| AC131097.4 | SNTA1    | 0.555010169 | 7.82E-37    |
| AC131097.4 | FRAS1    | 0.177314117 | 0.000188327 |
| AC131097.4 | FBLN7    | 0.515720983 | 3.35E-31    |
| AC131097.4 | AGPAT9   | 0.471325275 | 1.16E-25    |
| AC131097.4 | GPR83    | 0.486216134 | 1.98E-27    |
| AC131097.4 | PRTG     | 0.430251129 | 3.30E-21    |
| AC131097.4 | EGR3     | 0.178365066 | 0.000172186 |
| AC131097.4 | GRAMD2   | 0.408195397 | 4.67E-19    |
| AC131097.4 | HYOU1    | 0.516382941 | 2.73E-31    |
| AC131097.4 | FBLN5    | 0.295983557 | 2.51E-10    |
| AC131097.4 | ITM2A    | 0.505049165 | 8.55E-30    |
| AC131097.4 | SRF      | 0.42102074  | 2.74E-20    |
| AC131097.4 | FGFR2    | 0.33756449  | 3.68E-13    |

|            |          |             |             |
|------------|----------|-------------|-------------|
| AC131097.4 | MT1A     | 0.309456614 | 3.39E-11    |
| AC131097.4 | MAMDC2   | 0.254487301 | 6.44E-08    |
| AC131097.4 | FHL2     | 0.372564567 | 6.67E-16    |
| AC131097.4 | FTCDNL1  | 0.441248961 | 2.42E-22    |
| AC131097.4 | PKIA     | 0.368183831 | 1.53E-15    |
| AC131097.4 | DNAJB4   | 0.324093784 | 3.41E-12    |
| AC131097.4 | SLC25A33 | 0.60962594  | 5.04E-46    |
| AC131097.4 | EYA2     | 0.306997203 | 4.92E-11    |
| AC131097.4 | LPAR1    | 0.227437596 | 1.47E-06    |
| AC131097.4 | STX11    | 0.245942628 | 1.80E-07    |
| AC131097.4 | ARHGEF28 | 0.430531118 | 3.09E-21    |
| AC131097.4 | OR2W3    | 0.509896194 | 1.99E-30    |
| AC131097.4 | ALDH1B1  | 0.439627131 | 3.58E-22    |
| AC131097.4 | CXCL12   | 0.1827958   | 0.000117359 |
| AC131097.4 | OLFM2    | 0.451004789 | 2.21E-23    |
| AC131097.4 | TUB      | 0.354578379 | 1.88E-14    |
| AC131097.4 | HTRA3    | 0.25924639  | 3.57E-08    |
| AC131097.4 | CKB      | 0.550261079 | 4.11E-36    |
| AC131097.4 | RGS2     | 0.055119437 | 0.249130435 |
| AC131097.4 | SHANK2   | 0.52452061  | 2.12E-32    |
| AC131097.4 | CNTFR    | 0.522250101 | 4.36E-32    |
| AC131097.4 | CYTH3    | 0.457644224 | 4.13E-24    |
| AC131097.4 | PLAC9    | 0.441076132 | 2.53E-22    |
| AC131097.4 | WVOX     | 0.598954335 | 4.35E-44    |
| AC131097.4 | NPR3     | 0.450318081 | 2.62E-23    |
| AC131097.4 | SDC2     | 0.396378026 | 5.73E-18    |
| AC131097.4 | KLF15    | 0.495164974 | 1.55E-28    |
| AC131097.4 | TMEM164  | 0.537022988 | 3.66E-34    |
| AC131097.4 | LONRF3   | 0.191838608 | 5.22E-05    |
| AC131097.4 | GBP1     | 0.115189303 | 0.01575054  |
| AC131097.4 | ARHGAP6  | 0.37782484  | 2.41E-16    |
| AC131097.4 | TMEM119  | 0.126551162 | 0.007938784 |
| AC131097.4 | SH3RF1   | 0.361005979 | 5.85E-15    |
| AC131097.4 | CRELD2   | 0.576708753 | 2.80E-40    |
| AC131097.4 | PCP4     | 0.174238361 | 0.000244084 |
| AC131097.4 | GCSH     | 0.663397633 | 5.26E-57    |
| AC131097.4 | IMPA2    | 0.490656442 | 5.66E-28    |
| AC131097.4 | C1R      | 0.046230878 | 0.333844298 |
| AC131097.4 | SUCNR1   | 0.310242314 | 3.00E-11    |
| AC131097.4 | SFRP1    | 0.38069252  | 1.37E-16    |
| AC131097.4 | UGT8     | 0.45335781  | 1.22E-23    |
| AC131097.4 | TLE4     | 0.211821449 | 7.59E-06    |
| AC131097.4 | ANTXR1   | 0.320304654 | 6.25E-12    |
| AC131097.4 | GPX3     | 0.449526979 | 3.19E-23    |
| AC131097.4 | DPY19L2  | 0.515935655 | 3.14E-31    |
| AC131097.4 | FAM46C   | 0.371406815 | 8.32E-16    |
| AC131097.4 | IL33     | 0.17463289  | 0.000236155 |
| AC131097.4 | PEG3     | 0.481015929 | 8.40E-27    |
| AC131097.4 | FAHD2A   | 0.592786511 | 5.30E-43    |
| AC131097.4 | PTGDS    | 0.074009701 | 0.121531227 |
| AC131097.4 | CHCHD10  | 0.525341001 | 1.64E-32    |

|            |          |             |             |
|------------|----------|-------------|-------------|
| AC131097.4 | CD36     | 0.485923735 | 2.15E-27    |
| AC131097.4 | ANKRD37  | 0.491363504 | 4.62E-28    |
| AC131097.4 | TSPAN33  | 0.52321258  | 3.22E-32    |
| AC131097.4 | PRDM16   | 0.452252041 | 1.62E-23    |
| AC131097.4 | UST      | 0.499368697 | 4.58E-29    |
| AC131097.4 | NEXN     | 0.393400209 | 1.06E-17    |
| AC131097.4 | NUPR1L   | 0.285511371 | 1.11E-09    |
| AC131097.4 | SLC24A3  | 0.456268396 | 5.87E-24    |
| AC131097.4 | MARC1    | 0.557665234 | 3.06E-37    |
| AC131097.4 | MYH11    | 0.249472336 | 1.18E-07    |
| AC131097.4 | APOA1    | 0.572006987 | 1.65E-39    |
| AC131097.4 | TMEM178B | 0.44673958  | 6.35E-23    |
| AC131097.4 | CAPN6    | 0.234719582 | 6.57E-07    |
| AC131097.4 | PPM1L    | 0.528542496 | 5.86E-33    |
| AC131097.4 | FZD8     | 0.558489454 | 2.28E-37    |
| AC131097.4 | RCAN2    | 0.552590484 | 1.83E-36    |
| AC131097.4 | COPZ2    | 0.583626403 | 1.97E-41    |
| AC131097.4 | GAS1     | 0.192422981 | 4.95E-05    |
| AC131097.4 | DACT1    | 0.365703936 | 2.45E-15    |
| AC131097.4 | WBSCR17  | 0.537006747 | 3.68E-34    |
| AC131097.4 | NCS1     | 0.454127068 | 1.01E-23    |
| AC131097.4 | SPIRE2   | 0.427665991 | 6.00E-21    |
| AC131097.4 | C15orf52 | 0.382372095 | 9.86E-17    |
| AC131097.4 | SPAG5    | 0.423076398 | 1.72E-20    |
| AC131097.4 | ARL4D    | 0.476298682 | 3.05E-26    |
| AC131097.4 | FAM189A2 | 0.425378995 | 1.02E-20    |
| AC131097.4 | MAP1LC3A | 0.646848263 | 2.18E-53    |
| AC131097.4 | KLF6     | 0.028982673 | 0.544746984 |
| AC131097.4 | ADD3     | 0.289104628 | 6.72E-10    |
| AC131097.4 | TSPAN7   | 0.432842864 | 1.80E-21    |
| AC131097.4 | KLF9     | 0.292178683 | 4.35E-10    |
| AC131097.4 | KCNQ1    | 0.608936536 | 6.76E-46    |
| AC131097.4 | MAN1A1   | 0.090864447 | 0.057127973 |
| AC131097.4 | MLF1     | 0.32788951  | 1.84E-12    |
| AC131097.4 | RARB     | 0.460956069 | 1.77E-24    |
| AC131097.4 | CDC42EP2 | 0.500498294 | 3.29E-29    |
| AC131097.4 | FAM3B    | 0.215559518 | 5.18E-06    |
| AC131097.4 | GADD45B  | 0.242649647 | 2.65E-07    |
| AC131097.4 | TMEM47   | 0.488399162 | 1.07E-27    |
| AC131097.4 | SDF2L1   | 0.569386794 | 4.36E-39    |
| AC131097.4 | CCDC85A  | 0.231047798 | 9.90E-07    |
| AC131097.4 | CRYBG3   | 0.114873714 | 0.016040816 |
| AC131097.4 | FBLN2    | 0.051310592 | 0.283397729 |
| AC131097.4 | PEBP4    | 0.328594444 | 1.64E-12    |
| AC131097.4 | CDADC1   | 0.616658904 | 2.43E-47    |
| AC131097.4 | FAM63A   | 0.474793355 | 4.59E-26    |
| AC131097.4 | GLUL     | 0.237961264 | 4.55E-07    |
| AC131097.4 | FREM2    | 0.346909342 | 7.35E-14    |
| AC131097.4 | ACKR3    | 0.404748097 | 9.81E-19    |
| AC131097.4 | DENND6A  | 0.489626131 | 7.58E-28    |
| AC131097.4 | CLDN8    | 0.130912538 | 0.006015546 |



|            |          |              |             |
|------------|----------|--------------|-------------|
| AC131097.4 | UTS2R    | 0.167454593  | 0.000425935 |
| AC131097.4 | SCNN1B   | 0.392126717  | 1.38E-17    |
| AC131097.4 | TTC30A   | 0.50098799   | 2.85E-29    |
| AC131097.4 | CORO2B   | 0.515602052  | 3.48E-31    |
| AC131097.4 | TC2N     | 0.26081377   | 2.93E-08    |
| AC131097.4 | ALDH2    | 0.539064178  | 1.86E-34    |
| AC131097.4 | GPR183   | -0.010375447 | 0.828383084 |
| AC131097.4 | C4orf47  | 0.515959341  | 3.11E-31    |
| AC131097.4 | SLC25A42 | 0.612453834  | 1.50E-46    |
| AC131097.4 | LGMN     | 0.537231702  | 3.41E-34    |
| AC131097.4 | ACSF2    | 0.643236643  | 1.25E-52    |
| AC131097.4 | KIAA1467 | 0.489539114  | 7.77E-28    |
| AC131097.4 | PRKG1    | 0.514761378  | 4.50E-31    |
| AC131097.4 | GNAI1    | 0.509248491  | 2.42E-30    |
| AC131097.4 | ABCC4    | 0.321775088  | 4.94E-12    |
| AC131097.4 | PRPS1    | 0.542920398  | 5.08E-35    |
| AC131097.4 | TSPAN5   | 0.362763918  | 4.23E-15    |
| AC131097.4 | CR2      | 0.144978416  | 0.002326202 |
| AC131097.4 | CCDC170  | 0.399203013  | 3.18E-18    |
| AC131097.4 | RRAD     | 0.114403805  | 0.016481716 |
| AC131097.4 | SCGB2A1  | 0.442025524  | 2.01E-22    |
| AC131097.4 | SESN3    | 0.18960693   | 6.40E-05    |
| AC131097.4 | SGK223   | 0.215617742  | 5.15E-06    |
| AC131097.4 | NDRG2    | 0.62464431   | 7.09E-49    |
| AC131097.4 | C3orf52  | 0.263970942  | 1.97E-08    |
| AC131097.4 | FLRT3    | -0.29182118  | 4.57E-10    |
| AC131097.4 | MST1R    | -0.546116716 | 1.71E-35    |
| AC131097.4 | SDC1     | -0.239941889 | 3.63E-07    |
| AC131097.4 | ST8SIA4  | -0.471046422 | 1.25E-25    |
| AC131097.4 | UBTD1    | -0.23204889  | 8.86E-07    |
| AC131097.4 | EPHA2    | -0.30007083  | 1.38E-10    |
| AC131097.4 | TMEM130  | -0.220422362 | 3.12E-06    |
| AC131097.4 | SPINK2   | -0.318178574 | 8.75E-12    |
| AC131097.4 | MMP16    | -0.509781944 | 2.06E-30    |
| AC131097.4 | SIGLEC15 | -0.496468749 | 1.07E-28    |
| AC131097.4 | RIN1     | -0.438276534 | 4.95E-22    |
| AC131097.4 | IL1RN    | -0.444286918 | 1.16E-22    |
| AC131097.4 | FCER1G   | -0.273993496 | 5.33E-09    |
| AC131097.4 | CD276    | -0.520276251 | 8.11E-32    |
| AC131097.4 | CTSB     | -0.394968866 | 7.68E-18    |
| AC131097.4 | FAM171A2 | -0.065829409 | 0.16856153  |
| AC131097.4 | ASPHD1   | -0.478684964 | 1.59E-26    |
| AC131097.4 | C15orf48 | -0.370285727 | 1.03E-15    |
| AC131097.4 | DYSF     | -0.122053197 | 0.010479771 |
| AC131097.4 | PDZRN4   | -0.060305033 | 0.207281371 |
| AC131097.4 | EFHD2    | -0.147718989 | 0.001913927 |
| AC131097.4 | ASF1B    | -0.3059976   | 5.72E-11    |
| AC131097.4 | AQP1     | -0.086669306 | 0.069652918 |
| AC131097.4 | ARRDC2   | -0.389049897 | 2.58E-17    |
| AC131097.4 | PRSS1    | -0.35606388  | 1.44E-14    |
| AC131097.4 | MAPK13   | -0.489725701 | 7.37E-28    |

|            |          |              |             |
|------------|----------|--------------|-------------|
| AC131097.4 | CST5     | -0.505551283 | 7.36E-30    |
| AC131097.4 | AHR      | -0.507670473 | 3.90E-30    |
| AC131097.4 | BAX      | -0.258046015 | 4.15E-08    |
| AC131097.4 | C1orf115 | -0.296163124 | 2.45E-10    |
| AC131097.4 | PLK3     | -0.301933943 | 1.05E-10    |
| AC131097.4 | JAG2     | -0.140503621 | 0.003176384 |
| AC131097.4 | RAD23B   | -0.493143216 | 2.78E-28    |
| AC131097.4 | CA12     | 0.141486628  | 0.002968499 |
| AC131097.4 | ADTRP    | -0.342424213 | 1.60E-13    |
| AC131097.4 | UCP2     | -0.30854657  | 3.89E-11    |
| AC131097.4 | IGFBP2   | -0.174575297 | 0.000237297 |
| AC131097.4 | LOXL2    | -0.266545513 | 1.41E-08    |
| AC131097.4 | GPX1     | -0.168365489 | 0.000395731 |
| AC131097.4 | P3H3     | -0.349736031 | 4.47E-14    |
| AC131097.4 | C2orf81  | -0.310872713 | 2.73E-11    |
| AC131097.4 | CDT1     | -0.306883804 | 5.00E-11    |
| AC131097.4 | SNX25    | -0.304839068 | 6.81E-11    |
| AC131097.4 | MTHFD1L  | -0.470948341 | 1.29E-25    |
| AC131097.4 | CDC42BPG | -0.544790409 | 2.69E-35    |
| AC131097.4 | MSN      | -0.592657652 | 5.58E-43    |
| AC131097.4 | SIGLEC6  | -0.471740254 | 1.04E-25    |
| AC131097.4 | F2R      | -0.196193034 | 3.48E-05    |
| AC131097.4 | TMEM184A | -0.447166228 | 5.72E-23    |
| AC131097.4 | CKS2     | -0.181048995 | 0.000136653 |
| AC131097.4 | TAX1BP3  | -0.360192396 | 6.79E-15    |
| AC131097.4 | PMEPA1   | -0.400765996 | 2.29E-18    |
| AC131097.4 | CXCL16   | -0.53322322  | 1.28E-33    |
| AC131097.4 | FAXC     | -0.543065852 | 4.83E-35    |
| AC131097.4 | VTCN1    | -0.531891823 | 1.98E-33    |
| AC131097.4 | SH2D4A   | -0.536901291 | 3.81E-34    |
| AC131097.4 | RNF24    | -0.42127463  | 2.59E-20    |
| AC131097.4 | LY6G6C   | -0.478079201 | 1.88E-26    |
| AC131097.4 | NID1     | -0.334184704 | 6.49E-13    |
| AC131097.4 | STAC     | -0.622869563 | 1.57E-48    |
| AC131097.4 | RAB34    | -0.397949236 | 4.13E-18    |
| AC131097.4 | HES4     | -0.166110266 | 0.000474448 |
| AC131097.4 | EPHA10   | -0.573287621 | 1.02E-39    |
| AC131097.4 | ENTPD2   | -0.404532219 | 1.03E-18    |
| AC131097.4 | DDB2     | -0.392554429 | 1.26E-17    |
| AC131097.4 | NKAIN4   | -0.244043063 | 2.25E-07    |
| AC131097.4 | TRIM29   | -0.395866913 | 6.38E-18    |
| AC131097.4 | ADCY8    | -0.479843179 | 1.16E-26    |
| AC131097.4 | SFTA2    | -0.340037222 | 2.41E-13    |
| AC131097.4 | NRIP1    | -0.541779808 | 7.46E-35    |
| AC131097.4 | VWA1     | 0.022055661  | 0.644901969 |
| AC131097.4 | APLNR    | -0.100508436 | 0.035272603 |
| AC131097.4 | REN      | -0.41710645  | 6.60E-20    |
| AC131097.4 | EDIL3    | -0.2194468   | 3.46E-06    |
| AC131097.4 | AGRN     | -0.357510737 | 1.11E-14    |
| AC131097.4 | TREM1    | -0.393950895 | 9.48E-18    |
| AC131097.4 | SRL      | -0.217271999 | 4.34E-06    |

|            |          |              |             |
|------------|----------|--------------|-------------|
| AC131097.4 | RASGRF1  | -0.49533206  | 1.48E-28    |
| AC131097.4 | RMI2     | -0.37266825  | 6.54E-16    |
| AC131097.4 | SAMD1    | -0.351904237 | 3.04E-14    |
| AC131097.4 | MGAT4B   | -0.495986784 | 1.23E-28    |
| AC131097.4 | NXN      | -0.500234689 | 3.55E-29    |
| AC131097.4 | SH3BGRL3 | -0.3705699   | 9.76E-16    |
| AC131097.4 | CA11     | -0.227570924 | 1.45E-06    |
| AC131097.4 | PLD3     | -0.132546156 | 0.005410588 |
| AC131097.4 | LURAP1L  | -0.452933643 | 1.36E-23    |
| AC131097.4 | CARNS1   | -0.165801272 | 0.000486302 |
| AC131097.4 | PDLIM7   | -0.347747604 | 6.35E-14    |
| AC131097.4 | BCL2L1   | -0.513456469 | 6.73E-31    |
| AC131097.4 | GGT6     | -0.212301216 | 7.23E-06    |
| AC131097.4 | DPYSL3   | -0.319869991 | 6.69E-12    |
| AC131097.4 | FYN      | -0.500793601 | 3.01E-29    |
| AC131097.4 | TK1      | -0.235892628 | 5.76E-07    |
| AC131097.4 | AK1      | -0.106250675 | 0.026003693 |
| AC131097.4 | HIGD1B   | 0.040432684  | 0.398061108 |
| AC131097.4 | TMEM59L  | -0.262747093 | 2.30E-08    |
| AC131097.4 | MEGF9    | -0.441716601 | 2.16E-22    |
| AC131097.4 | ZFP36L1  | -0.50714319  | 4.57E-30    |
| AC131097.4 | ADRA1B   | -0.223589674 | 2.23E-06    |
| AC131097.4 | EPHA4    | -0.491820435 | 4.06E-28    |
| AC131097.4 | TCERG1L  | -0.211888964 | 7.54E-06    |
| AC131097.4 | NGFR     | -0.212107395 | 7.37E-06    |
| AC131097.4 | EBI3     | -0.443165476 | 1.52E-22    |
| AC131097.4 | S100A10  | -0.424009195 | 1.39E-20    |
| AC131097.4 | S100B    | -0.391507097 | 1.57E-17    |
| AC131097.4 | CD44     | -0.291818201 | 4.58E-10    |
| AC131097.4 | BHLHE41  | -0.467206301 | 3.47E-25    |
| AC131097.4 | FBXO2    | -0.251250133 | 9.55E-08    |
| AC131097.4 | SLC30A2  | -0.305294793 | 6.36E-11    |
| AC131097.4 | FRMD5    | -0.506735903 | 5.16E-30    |
| AC131097.4 | SAMD11   | -0.244919905 | 2.03E-07    |
| AC131097.4 | SIPA1L2  | -0.43404799  | 1.35E-21    |
| AC131097.4 | S100A16  | -0.441423777 | 2.32E-22    |
| AC131097.4 | PPL      | -0.57405766  | 7.63E-40    |
| AC131097.4 | ARHGD1B  | -0.15755077  | 0.000925146 |
| AC131097.4 | CDC42EP3 | -0.522044686 | 4.65E-32    |
| AC131097.4 | RUNX2    | -0.499261964 | 4.72E-29    |
| AC131097.4 | LAMC2    | -0.549283674 | 5.77E-36    |
| AC131097.4 | BRINP1   | -0.447369411 | 5.44E-23    |
| AC131097.4 | GPRC5B   | -0.475091499 | 4.23E-26    |
| AC131097.4 | AQP5     | -0.079920443 | 0.094441324 |
| AC131097.4 | PLAG1    | -0.352335424 | 2.82E-14    |
| AC131097.4 | PTPRU    | -0.524048148 | 2.47E-32    |
| AC131097.4 | ANGPTL4  | -0.298503734 | 1.74E-10    |
| AC131097.4 | PALM3    | -0.294377738 | 3.17E-10    |
| AC131097.4 | ACP5     | -0.31021267  | 3.02E-11    |
| AC131097.4 | DLG4     | -0.286790187 | 9.31E-10    |
| AC131097.4 | ETNK2    | -0.453207533 | 1.27E-23    |

|            |          |              |             |
|------------|----------|--------------|-------------|
| AC131097.4 | CD109    | -0.521017141 | 6.43E-32    |
| AC131097.4 | SNX22    | -0.280212168 | 2.31E-09    |
| AC131097.4 | TMEM98   | -0.482796846 | 5.14E-27    |
| AC131097.4 | CTHRC1   | -0.367701865 | 1.68E-15    |
| AC131097.4 | S100A2   | -0.370471393 | 9.95E-16    |
| AC131097.4 | C11orf80 | -0.525779351 | 1.42E-32    |
| AC131097.4 | SREBF1   | -0.442629612 | 1.73E-22    |
| AC131097.4 | PRSS22   | -0.509073534 | 2.55E-30    |
| AC131097.4 | CMTM3    | -0.377718675 | 2.46E-16    |
| AC131097.4 | RDH5     | -0.407429969 | 5.51E-19    |
| AC131097.4 | MYH10    | -0.443903884 | 1.27E-22    |
| AC131097.4 | EVPL     | -0.462350124 | 1.23E-24    |
| AC131097.4 | SCD      | -0.485865298 | 2.19E-27    |
| AC131097.4 | CD151    | -0.340111403 | 2.38E-13    |
| AC131097.4 | S100A4   | -0.401459158 | 1.98E-18    |
| AC131097.4 | BNIP1    | -0.343000571 | 1.45E-13    |
| AC131097.4 | MAP3K6   | -0.476371586 | 2.99E-26    |
| AC131097.4 | MANEAL   | -0.376700704 | 3.00E-16    |
| AC131097.4 | CD207    | -0.389363847 | 2.42E-17    |
| AC131097.4 | CD1A     | -0.425226171 | 1.05E-20    |
| AC131097.4 | C3       | -0.428448014 | 5.01E-21    |
| AC131097.4 | NT5E     | -0.448060658 | 4.59E-23    |
| AC131097.4 | CACNG4   | -0.502984432 | 1.58E-29    |
| AC131097.4 | FHOD1    | -0.423623042 | 1.52E-20    |
| AC131097.4 | LEMD1    | -0.500716299 | 3.08E-29    |
| AC131097.4 | ATP11A   | -0.346703393 | 7.62E-14    |
| AC131097.4 | PPAP2C   | -0.30555769  | 6.11E-11    |
| AC131097.4 | DRAM1    | -0.534418559 | 8.65E-34    |
| AC131097.4 | CDA      | -0.140317813 | 0.003217133 |
| AC131097.4 | CCND2    | -0.223630665 | 2.22E-06    |
| AC131097.4 | LCN6     | -0.200779088 | 2.25E-05    |
| AC131097.4 | CDH4     | -0.429603285 | 3.83E-21    |
| AC131097.4 | MMP11    | -0.458553618 | 3.28E-24    |
| AC131097.4 | B3GAT1   | -0.348921739 | 5.16E-14    |
| AC131097.4 | SPP1     | -0.310323304 | 2.97E-11    |
| AC131097.4 | HLA-DQB1 | -0.289152073 | 6.68E-10    |
| AC131097.4 | SDC3     | -0.456479734 | 5.56E-24    |
| AC131097.4 | CX3CL1   | -0.328642811 | 1.63E-12    |
| AC131097.4 | SDK1     | -0.39203204  | 1.41E-17    |
| AC131097.4 | DOCK9    | -0.577937353 | 1.76E-40    |
| AC131097.4 | CSF2     | -0.526025904 | 1.31E-32    |
| AC131097.4 | GRHL3    | -0.535196753 | 6.69E-34    |
| AC131097.4 | TMEM92   | -0.575741908 | 4.05E-40    |
| AC131097.4 | BASP1    | -0.528887943 | 5.24E-33    |
| AC131097.4 | HRH1     | -0.519109917 | 1.17E-31    |
| AC131097.4 | ESM1     | -0.038979838 | 0.415244396 |
| AC131097.4 | B4GALNT3 | -0.486632712 | 1.76E-27    |
| AC131097.4 | LMO3     | -0.269436455 | 9.71E-09    |
| AC131097.4 | C9orf16  | -0.303824714 | 7.93E-11    |
| AC131097.4 | SEMA3F   | -0.171800025 | 0.000298879 |
| AC131097.4 | PLA2G12B | -0.280584347 | 2.19E-09    |

|            |          |              |             |
|------------|----------|--------------|-------------|
| AC131097.4 | KLK6     | -0.438744559 | 4.43E-22    |
| AC131097.4 | ST3GAL5  | -0.296092772 | 2.47E-10    |
| AC131097.4 | FAM132B  | -0.148460021 | 0.001814565 |
| AC131097.4 | CDKN1A   | -0.182174337 | 0.00012391  |
| AC131097.4 | E2F1     | -0.301131778 | 1.18E-10    |
| AC131097.4 | B3GNT8   | -0.280315143 | 2.28E-09    |
| AC131097.4 | MTMR11   | -0.567833952 | 7.73E-39    |
| AC131097.4 | MYO1G    | -0.473782476 | 6.02E-26    |
| AC131097.4 | TMSB10   | -0.373691824 | 5.37E-16    |
| AC131097.4 | UNC5CL   | -0.585022301 | 1.14E-41    |
| AC131097.4 | ABR      | -0.46757047  | 3.15E-25    |
| AC131097.4 | PLP2     | -0.426417604 | 8.00E-21    |
| AC131097.4 | SRCIN1   | -0.405951166 | 7.58E-19    |
| AC131097.4 | PDE9A    | -0.515905727 | 3.16E-31    |
| AC131097.4 | TREM2    | -0.248415005 | 1.34E-07    |
| AC131097.4 | KDEL3    | -0.350639893 | 3.81E-14    |
| AC131097.4 | PC       | -0.458593829 | 3.24E-24    |
| AC131097.4 | C2CD4A   | -0.571087147 | 2.32E-39    |
| AC131097.4 | PELI1    | -0.520479292 | 7.61E-32    |
| AC131097.4 | SSX1     | -0.2483382   | 1.36E-07    |
| AC131097.4 | MROH6    | -0.455642607 | 6.88E-24    |
| AC131097.4 | ESPN     | -0.406686667 | 6.47E-19    |
| AC131097.4 | BMP1     | -0.381431851 | 1.19E-16    |
| AC131097.4 | TM4SF4   | -0.385029276 | 5.81E-17    |
| AC131097.4 | CORO2A   | -0.543066491 | 4.83E-35    |
| AC131097.4 | CD164L2  | -0.337299194 | 3.84E-13    |
| AC131097.4 | CTSS     | -0.421018613 | 2.74E-20    |
| AC131097.4 | CLU      | -0.395730677 | 6.56E-18    |
| AC131097.4 | TMSB4X   | -0.386656097 | 4.19E-17    |
| AC131097.4 | WNT10A   | -0.444788047 | 1.03E-22    |
| AC131097.4 | NAPSA    | -0.356080797 | 1.44E-14    |
| AC131097.4 | PLEKHA4  | -0.408646513 | 4.24E-19    |
| AC131097.4 | SFTPA1   | -0.102229314 | 0.032237906 |
| AC131097.4 | C1orf116 | -0.534430403 | 8.61E-34    |
| AC131097.4 | TM4SF1   | -0.38931407  | 2.45E-17    |
| AC131097.4 | SEL1L3   | -0.504085731 | 1.14E-29    |
| AC131097.4 | VASN     | -0.446416402 | 6.88E-23    |
| AC131097.4 | NPTXR    | -0.548839579 | 6.72E-36    |
| AC131097.4 | PDE4C    | -0.456438389 | 5.62E-24    |
| AC131097.4 | CDC42EP1 | -0.492095175 | 3.75E-28    |
| AC131097.4 | ENDOD1   | -0.600847163 | 2.00E-44    |
| AC131097.4 | RYR1     | -0.351678927 | 3.17E-14    |
| AC131097.4 | IL1RAP   | -0.532393184 | 1.68E-33    |
| AC131097.4 | SLC35F2  | -0.565832993 | 1.61E-38    |
| AC131097.4 | ISYNA1   | -0.278094811 | 3.08E-09    |
| AC131097.4 | HLA-G    | -0.441856099 | 2.09E-22    |
| AC131097.4 | CDKN2B   | -0.499821373 | 4.01E-29    |
| AC131097.4 | ALDH1A3  | -0.387911221 | 3.25E-17    |
| AC131097.4 | CLIP3    | -0.406024709 | 7.46E-19    |
| AC131097.4 | ULBP2    | -0.354770924 | 1.82E-14    |
| AC131097.4 | ETHE1    | -0.517522538 | 1.92E-31    |

|            |          |              |             |
|------------|----------|--------------|-------------|
| AC131097.4 | XPR1     | -0.513729932 | 6.18E-31    |
| AC131097.4 | SPTBN2   | -0.585397676 | 9.88E-42    |
| AC131097.4 | IVL      | -0.513427033 | 6.79E-31    |
| AC131097.4 | MARCO    | -0.410149144 | 3.06E-19    |
| AC131097.4 | PLXND1   | -0.253571524 | 7.20E-08    |
| AC131097.4 | EMILIN2  | -0.369923119 | 1.10E-15    |
| AC131097.4 | PLAUR    | -0.482317221 | 5.87E-27    |
| AC131097.4 | CDC42EP5 | -0.416383703 | 7.75E-20    |
| AC131097.4 | TRPC5    | -0.312440262 | 2.14E-11    |
| AC131097.4 | TMEM100  | -0.359158397 | 8.21E-15    |
| AC131097.4 | QSOX1    | -0.523566608 | 2.87E-32    |
| AC131097.4 | ARHGAP23 | -0.482878048 | 5.02E-27    |
| AC131097.4 | MDFI     | -0.318083259 | 8.88E-12    |
| AC131097.4 | FSTL3    | -0.471811496 | 1.02E-25    |
| AC131097.4 | INF2     | -0.430083477 | 3.43E-21    |
| AC131097.4 | TGFBR1   | -0.584635864 | 1.33E-41    |
| AC131097.4 | TGFBI    | -0.306424887 | 5.36E-11    |
| AC131097.4 | ERBB3    | -0.622251149 | 2.07E-48    |
| AC131097.4 | CCL18    | -0.353705579 | 2.20E-14    |
| AC131097.4 | CCL17    | -0.421115645 | 2.68E-20    |
| AC131097.4 | C16orf45 | -0.342838025 | 1.49E-13    |
| AC131097.4 | PRDM1    | -0.313437569 | 1.84E-11    |
| AC131097.4 | TRIM47   | -0.467744292 | 3.01E-25    |
| AC131097.4 | CNFN     | -0.293876341 | 3.41E-10    |
| AC131097.4 | ARMCX3   | -0.392341601 | 1.32E-17    |
| AC131097.4 | RAMP1    | -0.302459311 | 9.71E-11    |
| AC131097.4 | GABRD    | 0.002395856  | 0.960077997 |
| AC131097.4 | COL13A1  | -0.21799211  | 4.03E-06    |
| AC131097.4 | S100A5   | -0.294380717 | 3.17E-10    |
| AC131097.4 | MISP     | -0.446530652 | 6.69E-23    |
| AC131097.4 | HES6     | -0.15127905  | 0.001478222 |
| AC131097.4 | PSD3     | -0.542719697 | 5.43E-35    |
| AC131097.4 | DOK7     | -0.437437137 | 6.05E-22    |
| AC131097.4 | ZMAT3    | -0.479165014 | 1.40E-26    |
| AC131097.4 | MFAP2    | -0.370675143 | 9.57E-16    |
| AC131097.4 | TMEM79   | -0.510060017 | 1.89E-30    |
| AC131097.4 | SLC1A5   | -0.411228248 | 2.42E-19    |
| AC131097.4 | BBC3     | -0.377102034 | 2.78E-16    |
| AC131097.4 | HLA-DQB2 | -0.352475347 | 2.75E-14    |
| AC131097.4 | C1QL1    | -0.344666671 | 1.09E-13    |
| AC131097.4 | TMEM215  | -0.139421707 | 0.003420402 |
| AC131097.4 | PNP      | -0.408336526 | 4.53E-19    |
| AC131097.4 | ARNTL    | -0.492391262 | 3.45E-28    |
| AC131097.4 | CLDN2    | -0.291329934 | 4.91E-10    |
| AC131097.4 | MVP      | -0.50315804  | 1.50E-29    |
| AC131097.4 | LGALS1   | -0.331341704 | 1.04E-12    |
| AC131097.4 | BIRC7    | -0.410450841 | 2.86E-19    |
| AC131097.4 | COL8A1   | -0.559633164 | 1.51E-37    |
| AC131097.4 | PERP     | -0.594938619 | 2.23E-43    |
| AC131097.4 | GJA4     | -0.138227476 | 0.003709401 |
| AC131097.4 | IGFL2    | -0.421179233 | 2.64E-20    |

|            |           |              |          |
|------------|-----------|--------------|----------|
| AC131097.4 | DAPK2     | -0.426445901 | 7.95E-21 |
| AC131097.4 | MAMLD1    | -0.53154783  | 2.21E-33 |
| AC131097.4 | ETV5      | -0.265576618 | 1.60E-08 |
| AC131097.4 | RUNX1     | -0.629320424 | 8.53E-50 |
| AC131097.4 | LONRF2    | -0.331990683 | 9.36E-13 |
| AC131097.4 | SPOCK1    | -0.19854953  | 2.79E-05 |
| AC131097.4 | XKRX      | -0.41347567  | 1.48E-19 |
| AC131097.4 | TGFB1     | -0.24356826  | 2.38E-07 |
| AC131097.4 | ERP27     | -0.247277961 | 1.54E-07 |
| AC131097.4 | TNFRSF10C | -0.34083194  | 2.11E-13 |
| AC131097.4 | PALM      | -0.478966441 | 1.48E-26 |
| AC131097.4 | TSC22D1   | -0.315914414 | 1.25E-11 |
| AC131097.4 | TGM2      | -0.505174692 | 8.23E-30 |
| AC131097.4 | UBE2QL1   | -0.24086958  | 3.26E-07 |
| AC131097.4 | ECE1      | -0.503964247 | 1.18E-29 |
| AC131097.4 | COL8A2    | -0.532053128 | 1.88E-33 |
| AC131097.4 | HIST3H2A  | -0.356130653 | 1.42E-14 |
| AC131097.4 | TNFRSF21  | -0.496627537 | 1.02E-28 |
| AC131097.4 | SOX4      | -0.563382296 | 3.93E-38 |
| AC131097.4 | ELF3      | -0.599143405 | 4.02E-44 |
| AC131097.4 | TPD52L1   | -0.445203829 | 9.26E-23 |
| AC131097.4 | INHBB     | -0.350992715 | 3.58E-14 |
| AC131097.4 | HPN       | -0.347637609 | 6.47E-14 |
| AC131097.4 | MMP7      | -0.455852439 | 6.52E-24 |
| AC131097.4 | RAB27A    | -0.505404611 | 7.69E-30 |
| AC131097.4 | IGF2BP2   | -0.533139748 | 1.32E-33 |
| AC131097.4 | ITGB4     | -0.505326175 | 7.87E-30 |
| AC131097.4 | PPP1R1B   | -0.482338709 | 5.83E-27 |
| AC131097.4 | NPDC1     | -0.199971739 | 2.44E-05 |
| AC131097.4 | CCL13     | -0.474808984 | 4.57E-26 |
| AC131097.4 | SPINT1    | -0.550020877 | 4.47E-36 |
| AC131097.4 | HEY2      | -0.314862828 | 1.47E-11 |
| AC131097.4 | CST2      | -0.469406934 | 1.94E-25 |
| AC131097.4 | ADM       | -0.24612106  | 1.76E-07 |
| AC131097.4 | VSTM2L    | -0.34497141  | 1.03E-13 |
| AC131097.4 | FAM84A    | -0.5104083   | 1.70E-30 |
| AC131097.4 | P4HA2     | -0.398837993 | 3.43E-18 |
| AC131097.4 | LPL       | -0.329695816 | 1.37E-12 |
| AC131097.4 | TMEM173   | -0.392368976 | 1.31E-17 |
| AC131097.4 | DHRS3     | -0.405327647 | 8.67E-19 |
| AC131097.4 | SCN1B     | -0.389318751 | 2.45E-17 |
| AC131097.4 | GLT1D1    | -0.230302156 | 1.08E-06 |
| AC131097.4 | PHYHIP    | -0.414298259 | 1.23E-19 |
| AC131097.4 | BHLHE40   | -0.566515568 | 1.25E-38 |
| AC131097.4 | BID       | -0.483027262 | 4.82E-27 |
| AC131097.4 | POSTN     | -0.37954576  | 1.72E-16 |
| AC131097.4 | ITGA3     | -0.640240174 | 5.24E-52 |
| AC131097.4 | RSP04     | -0.476373005 | 2.99E-26 |
| AC131097.4 | ADAMTS9   | -0.208521944 | 1.06E-05 |
| AC131097.4 | ABTB2     | -0.620421085 | 4.66E-48 |
| AC131097.4 | KCNQ3     | -0.640660724 | 4.29E-52 |

|            |            |              |             |
|------------|------------|--------------|-------------|
| AC131097.4 | ANXA1      | -0.454654989 | 8.83E-24    |
| AC131097.4 | S100A11    | -0.476970994 | 2.54E-26    |
| AC131097.4 | CEACAM6    | -0.500083064 | 3.71E-29    |
| AC131097.4 | IER5L      | -0.406942968 | 6.12E-19    |
| AC131097.4 | KRT80      | -0.512732102 | 8.40E-31    |
| AC131097.4 | CDH6       | -0.456268183 | 5.87E-24    |
| AC131097.4 | UNC5B      | -0.376146046 | 3.34E-16    |
| AC131097.4 | PLEKHN1    | -0.529544369 | 4.24E-33    |
| AC131097.4 | SYTL1      | -0.270536195 | 8.41E-09    |
| AC131097.4 | TMEM163    | -0.425841884 | 9.14E-21    |
| AC131097.4 | C4orf48    | -0.092284174 | 0.053337269 |
| AC131097.4 | B3GNT7     | -0.340796126 | 2.12E-13    |
| AC131097.4 | BAIAP3     | -0.458799281 | 3.08E-24    |
| AC131097.4 | PHLDA2     | -0.347225782 | 6.96E-14    |
| AC131097.4 | GAP43      | -0.473187131 | 7.07E-26    |
| AC131097.4 | S100A1     | -0.318932939 | 7.76E-12    |
| AC131097.4 | PTPRE      | -0.648835838 | 8.23E-54    |
| AC131097.4 | CCND1      | -0.41584557  | 8.73E-20    |
| AC131097.4 | ST6GALNAC5 | -0.568879985 | 5.25E-39    |
| AC131097.4 | KRT17      | -0.282459945 | 1.70E-09    |
| AC131097.4 | HPCAL4     | -0.377735837 | 2.45E-16    |
| AC131097.4 | GABBR2     | -0.356316036 | 1.38E-14    |
| AC131097.4 | DIRAS3     | -0.335367136 | 5.33E-13    |
| AC131097.4 | SERINC2    | -0.352125929 | 2.92E-14    |
| AC131097.4 | PTCHD4     | -0.310488474 | 2.89E-11    |
| AC131097.4 | EPS8       | -0.457876625 | 3.89E-24    |
| AC131097.4 | LY6E       | -0.421298601 | 2.57E-20    |
| AC131097.4 | UPP1       | -0.496670655 | 1.01E-28    |
| AC131097.4 | AHNAK2     | -0.598076004 | 6.23E-44    |
| AC131097.4 | PLXNC1     | -0.443470498 | 1.41E-22    |
| AC131097.4 | TNC        | -0.450210496 | 2.69E-23    |
| AC131097.4 | DUSP4      | -0.411372071 | 2.34E-19    |
| AC131097.4 | NRCAM      | -0.497661606 | 7.54E-29    |
| AC131097.4 | NRP2       | -0.456921205 | 4.97E-24    |
| AC131097.4 | CTSC       | -0.527218368 | 8.97E-33    |
| AC131097.4 | AMIGO2     | -0.383343472 | 8.13E-17    |
| AC131097.4 | NAB2       | -0.343430128 | 1.35E-13    |
| AC131097.4 | TBC1D2     | -0.623868811 | 1.00E-48    |
| AC131097.4 | PHLDA3     | -0.361531701 | 5.31E-15    |
| AC131097.4 | PTP4A3     | -0.326061431 | 2.48E-12    |
| AC131097.4 | CRABP2     | -0.291223688 | 4.98E-10    |
| AC131097.4 | GOS2       | -0.2852755   | 1.15E-09    |
| AC131097.4 | S100A6     | -0.484604287 | 3.11E-27    |
| AC131097.4 | FOXQ1      | -0.542588    | 5.68E-35    |
| AC131097.4 | LRG1       | -0.463687585 | 8.71E-25    |
| AC131097.4 | LAMP5      | -0.350605214 | 3.83E-14    |
| AC131097.4 | ALDH3B1    | -0.504430965 | 1.03E-29    |
| AC131097.4 | CDH2       | -0.044115081 | 0.356462202 |
| AC131097.4 | SCG5       | -0.180110169 | 0.000148216 |
| AC131097.4 | ZCCHC16    | -0.300697487 | 1.26E-10    |
| AC131097.4 | GRB7       | -0.579458636 | 9.83E-41    |



|            |         |              |            |
|------------|---------|--------------|------------|
| AC131097.4 | TIAM1   | -0.367039624 | 1.90E-15   |
| AC131097.4 | FXD5    | -0.296887986 | 2.20E-10   |
| AC131097.4 | CLDN9   | -0.311261349 | 2.57E-11   |
| AC131097.4 | FAM43A  | -0.48727389  | 1.47E-27   |
| AC131097.4 | CHST2   | -0.443477307 | 1.41E-22   |
| AC131097.4 | HMGA2   | -0.426749008 | 7.42E-21   |
| AC131097.4 | GALNT7  | -0.538252156 | 2.43E-34   |
| AC131097.4 | CBLN1   | -0.416969565 | 6.80E-20   |
| AC131097.4 | STRA6   | -0.503095277 | 1.53E-29   |
| AC131097.4 | MUC21   | -0.530648951 | 2.96E-33   |
| AC131097.4 | PRR36   | -0.495481486 | 1.42E-28   |
| AC131097.4 | NFE2L3  | -0.489527979 | 7.79E-28   |
| AC131097.4 | NR1D1   | -0.350542592 | 3.88E-14   |
| AC131097.4 | MUC1    | -0.546266922 | 1.63E-35   |
| AC131097.4 | NAT8L   | -0.177182846 | 0.00019044 |
| AC131097.4 | APOC1   | -0.186542875 | 8.43E-05   |
| AC131097.4 | EVA1A   | -0.558697814 | 2.12E-37   |
| AC131097.4 | ENTPD1  | -0.29539805  | 2.74E-10   |
| AC131097.4 | COL1A1  | -0.436050671 | 8.42E-22   |
| AC131097.4 | FNDC4   | -0.33953235  | 2.63E-13   |
| AC131097.4 | FRMD3   | -0.175639649 | 0.000217   |
| AC131097.4 | SHROOM4 | -0.554251619 | 1.02E-36   |
| AC131097.4 | NELL2   | -0.299197534 | 1.57E-10   |
| AC131097.4 | EPHB3   | -0.591524792 | 8.78E-43   |
| AC131097.4 | TMC6    | -0.508129319 | 3.40E-30   |
| AC131097.4 | NOD1    | -0.533682988 | 1.10E-33   |
| AC131097.4 | GGCT    | -0.516241812 | 2.85E-31   |
| AC131097.4 | ICAM1   | -0.56607814  | 1.47E-38   |
| AC131097.4 | PRSS23  | -0.424076143 | 1.37E-20   |
| AC131097.4 | CFI     | -0.49246367  | 3.38E-28   |
| AC131097.4 | CD55    | -0.589101419 | 2.30E-42   |
| AC131097.4 | RASD2   | -0.466012947 | 4.74E-25   |
| AC131097.4 | KLK11   | -0.420929675 | 2.80E-20   |
| AC131097.4 | ICAM5   | -0.457522243 | 4.26E-24   |
| AC131097.4 | ADORA1  | -0.379293643 | 1.81E-16   |
| AC131097.4 | ITGA2   | -0.587572761 | 4.21E-42   |
| AC131097.4 | ABCC3   | -0.441697524 | 2.17E-22   |
| AC131097.4 | MFGE8   | -0.449749098 | 3.02E-23   |
| AC131097.4 | STK32A  | -0.316483255 | 1.14E-11   |
| AC131097.4 | CYSLTR2 | -0.380984494 | 1.30E-16   |
| AC131097.4 | LAD1    | -0.56301444  | 4.49E-38   |
| AC131097.4 | MGAT3   | -0.539317713 | 1.70E-34   |
| AC131097.4 | IGFBP6  | -0.358582961 | 9.12E-15   |
| AC131097.4 | CYP2S1  | -0.561137923 | 8.83E-38   |
| AC131097.4 | KCNJ2   | -0.412391744 | 1.87E-19   |
| AC131097.4 | FAM20A  | -0.477885139 | 1.98E-26   |
| AC131097.4 | TGFA    | -0.428310006 | 5.17E-21   |
| AC131097.4 | MXRA8   | -0.489214659 | 8.51E-28   |
| AC131097.4 | C8orf4  | -0.372265572 | 7.06E-16   |
| AC131097.4 | CLDN10  | -0.493201731 | 2.73E-28   |
| AC131097.4 | PDE5A   | -0.562955222 | 4.58E-38   |

|            |           |              |             |
|------------|-----------|--------------|-------------|
| AC131097.4 | APOE      | -0.161076649 | 0.000705447 |
| AC131097.4 | SPOCK2    | -0.509519756 | 2.23E-30    |
| AC131097.4 | TENM1     | -0.259878633 | 3.30E-08    |
| AC131097.4 | SLIT1     | -0.162448648 | 0.000633864 |
| AC131097.4 | CXCL14    | -0.308940384 | 3.66E-11    |
| AC131097.4 | ECM1      | -0.159646568 | 0.000787973 |
| AC131097.4 | DUSP5     | -0.537970536 | 2.67E-34    |
| AC131097.4 | SEZ6L2    | -0.412621593 | 1.78E-19    |
| AC131097.4 | THRSP     | -0.134341896 | 0.004809228 |
| AC131097.4 | C19orf33  | -0.452771877 | 1.42E-23    |
| AC131097.4 | MPZL2     | -0.541570738 | 8.01E-35    |
| AC131097.4 | CTSH      | -0.493988854 | 2.18E-28    |
| AC131097.4 | CYP1B1    | -0.546703712 | 1.40E-35    |
| AC131097.4 | ALOX5     | -0.531045582 | 2.60E-33    |
| AC131097.4 | SYTL5     | -0.502898494 | 1.62E-29    |
| AC131097.4 | TNFRSF12A | -0.358015042 | 1.01E-14    |
| AC131097.4 | DUSP6     | -0.413182775 | 1.57E-19    |
| AC131097.4 | ALOX15B   | -0.504239058 | 1.09E-29    |
| AC131097.4 | SDC4      | -0.51509803  | 4.06E-31    |
| AC131097.4 | MDK       | -0.419091886 | 4.23E-20    |
| AC131097.4 | KRT19     | -0.530930409 | 2.70E-33    |
| AC131097.4 | MET       | -0.637704395 | 1.74E-51    |
| AC131097.4 | TESC      | -0.207718999 | 1.15E-05    |
| AC131097.4 | CXCL17    | -0.582089893 | 3.57E-41    |
| AC131097.4 | NPC2      | -0.347704273 | 6.40E-14    |
| AC131097.4 | COMP      | -0.418841471 | 4.48E-20    |
| AC131097.4 | TUSC3     | -0.415340839 | 9.77E-20    |
| AC131097.4 | TMPRSS4   | -0.631234811 | 3.54E-50    |
| AC131097.4 | LGALS3    | -0.508987438 | 2.62E-30    |
| AC131097.4 | CRLF1     | -0.286127379 | 1.02E-09    |
| AC131097.4 | CTXN1     | -0.418843315 | 4.47E-20    |
| AC131097.4 | PCSK1N    | -0.181214023 | 0.000134711 |
| AC131097.4 | NMU       | -0.458227598 | 3.56E-24    |
| AC131097.4 | GALE      | -0.438662191 | 4.52E-22    |
| AC131097.4 | PCSK2     | -0.182499359 | 0.000120442 |
| AC131097.4 | GJB3      | -0.470123979 | 1.60E-25    |
| AC131097.4 | SLPI      | -0.450741041 | 2.36E-23    |
| AC131097.4 | AGR2      | -0.224591688 | 2.00E-06    |
| AC131097.4 | MRC2      | -0.389038833 | 2.59E-17    |
| AC131097.4 | GOLT1A    | -0.397877182 | 4.20E-18    |
| AC131097.4 | SLC27A6   | -0.537616102 | 3.01E-34    |
| AC131097.4 | KCNN4     | -0.522118088 | 4.55E-32    |
| AC131097.4 | ETV4      | -0.383042151 | 8.63E-17    |
| AC131097.4 | SYT12     | -0.573801571 | 8.40E-40    |
| AC131097.4 | PVRL4     | -0.62710839  | 2.33E-49    |
| AC131097.4 | PLCD3     | -0.502873017 | 1.63E-29    |
| AC131097.4 | PLAU      | -0.44639314  | 6.92E-23    |
| AC131097.4 | LRRK2     | -0.266497501 | 1.42E-08    |
| AC131097.4 | SFN       | -0.508873684 | 2.71E-30    |
| AC131097.4 | LPAR5     | -0.541009273 | 9.67E-35    |
| AC131097.4 | NGEF      | -0.554762874 | 8.53E-37    |

|              |          |              |          |
|--------------|----------|--------------|----------|
| AC131097.4   | DTX4     | -0.570152151 | 3.28E-39 |
| AC131097.4   | CST6     | -0.425019223 | 1.10E-20 |
| AC131097.4   | QPCT     | -0.456395553 | 5.68E-24 |
| AC131097.4   | TIMP1    | -0.432525217 | 1.94E-21 |
| AC131097.4   | CAMK2N1  | -0.532134897 | 1.83E-33 |
| AC131097.4   | KLHDC8A  | -0.217703895 | 4.15E-06 |
| AC131097.4   | PDLIM4   | -0.541264085 | 8.88E-35 |
| AC131097.4   | SCEL     | -0.520824242 | 6.83E-32 |
| AC131097.4   | LCN2     | -0.542876073 | 5.15E-35 |
| AC131097.4   | PROS1    | -0.617305401 | 1.84E-47 |
| AC131097.4   | GABRB2   | -0.579648699 | 9.14E-41 |
| AC131097.4   | TMPRSS6  | -0.606289343 | 2.07E-45 |
| AC131097.4   | KLK7     | -0.456936509 | 4.95E-24 |
| AC131097.4   | PDZK1IP1 | -0.466551719 | 4.12E-25 |
| AC131097.4   | CDH3     | -0.47155945  | 1.09E-25 |
| AC131097.4   | LRP4     | -0.304000877 | 7.72E-11 |
| AC131097.4   | IGSF1    | -0.295214228 | 2.81E-10 |
| AC131097.4   | B3GNT3   | -0.545352351 | 2.22E-35 |
| AC131097.4   | CLDN1    | -0.515518651 | 3.57E-31 |
| AC131097.4   | GDF15    | -0.47436699  | 5.15E-26 |
| AC131097.4   | ARHGAP36 | -0.246314511 | 1.72E-07 |
| AC131097.4   | LAMB3    | -0.5158736   | 3.20E-31 |
| AC131097.4   | KLK10    | -0.509120199 | 2.52E-30 |
| AC131097.4   | DPP4     | -0.522805222 | 3.66E-32 |
| AC131097.4   | METTL7B  | -0.359473065 | 7.75E-15 |
| AC131097.4   | LIPH     | -0.556750521 | 4.23E-37 |
| AC131097.4   | CLDN16   | -0.478603123 | 1.63E-26 |
| AC131097.4   | CHI3L1   | -0.503914178 | 1.20E-29 |
| AC131097.4   | SLC22A31 | -0.441077139 | 2.53E-22 |
| AC131097.4   | TACSTD2  | -0.56975614  | 3.80E-39 |
| AC131097.4   | SFTPB    | -0.533757452 | 1.07E-33 |
| AC131097.4   | RXRG     | -0.317794122 | 9.29E-12 |
| AC131097.4   | DCSTAMP  | -0.588018862 | 3.53E-42 |
| AC131097.4   | CITED1   | -0.363252125 | 3.86E-15 |
| AC131097.4   | SERPINA1 | -0.56492372  | 2.24E-38 |
| AC131097.4   | PRR15    | -0.320400394 | 6.15E-12 |
| AC131097.4   | SLC34A2  | -0.627612837 | 1.86E-49 |
| AC131097.4   | FN1      | -0.648635492 | 9.08E-54 |
| AC131097.4   | ZCCHC12  | -0.265498182 | 1.62E-08 |
| RP11-65I12.1 | TFF3     | 0.454048599  | 0        |
| RP11-65I12.1 | CCL21    | 0.241397805  | 3.07E-07 |
| RP11-65I12.1 | TPO      | 0.498984304  | 0        |
| RP11-65I12.1 | MT1G     | 0.407492263  | 0        |
| RP11-65I12.1 | DI01     | 0.528067441  | 0        |
| RP11-65I12.1 | DPT      | 0.2123526    | 7.19E-06 |
| RP11-65I12.1 | CDH16    | 0.479084413  | 0        |
| RP11-65I12.1 | CRABP1   | 0.355918265  | 1.48E-14 |
| RP11-65I12.1 | SLC26A7  | 0.572418351  | 0        |
| RP11-65I12.1 | MT1H     | 0.372560241  | 6.67E-16 |
| RP11-65I12.1 | SLC26A4  | 0.508350236  | 0        |
| RP11-65I12.1 | SLC5A8   | 0.513364218  | 6.92E-31 |

|              |           |             |             |
|--------------|-----------|-------------|-------------|
| RP11-65I12.1 | PKHD1L1   | 0.580491005 | 6.62E-41    |
| RP11-65I12.1 | TFCP2L1   | 0.553971014 | 0           |
| RP11-65I12.1 | WSCD2     | 0.528864017 | 5.28E-33    |
| RP11-65I12.1 | IPCEF1    | 0.531575782 | 0           |
| RP11-65I12.1 | SLC5A5    | 0.387392469 | 3.61E-17    |
| RP11-65I12.1 | MT1F      | 0.404076825 | 0           |
| RP11-65I12.1 | FOSB      | 0.358962121 | 1.08E-14    |
| RP11-65I12.1 | SEMA3D    | 0.564103808 | 3.02E-38    |
| RP11-65I12.1 | BMP8A     | 0.569947265 | 0           |
| RP11-65I12.1 | MATN2     | 0.548963029 | 0           |
| RP11-65I12.1 | PLA2R1    | 0.606820097 | 0           |
| RP11-65I12.1 | COL23A1   | 0.422927405 | 0           |
| RP11-65I12.1 | HGD       | 0.485573036 | 0           |
| RP11-65I12.1 | TCEAL2    | 0.331851514 | 1.29E-12    |
| RP11-65I12.1 | CHRD1     | 0.336527257 | 4.38E-13    |
| RP11-65I12.1 | TNFRSF11B | 0.521344361 | 0           |
| RP11-65I12.1 | FAM167A   | 0.496850507 | 0           |
| RP11-65I12.1 | KIT       | 0.554770976 | 0           |
| RP11-65I12.1 | SLC4A4    | 0.588454316 | 0           |
| RP11-65I12.1 | SMOC2     | 0.351736938 | 4.20E-14    |
| RP11-65I12.1 | FHL1      | 0.556096727 | 0           |
| RP11-65I12.1 | OTOS      | 0.336271017 | 6.20E-13    |
| RP11-65I12.1 | IGFBPL1   | 0.542391791 | 6.07E-35    |
| RP11-65I12.1 | HBB       | 0.193976461 | 4.43E-05    |
| RP11-65I12.1 | BEX1      | 0.3093743   | 4.35E-11    |
| RP11-65I12.1 | FABP4     | 0.345553739 | 9.32E-14    |
| RP11-65I12.1 | LMOD1     | 0.474676824 | 0           |
| RP11-65I12.1 | SOD3      | 0.362237282 | 5.68E-15    |
| RP11-65I12.1 | TMEM171   | 0.463355952 | 0           |
| RP11-65I12.1 | PI16      | 0.250361401 | 1.17E-07    |
| RP11-65I12.1 | ZMAT4     | 0.464366664 | 7.30E-25    |
| RP11-65I12.1 | MFAP4     | 0.167157754 | 0.000443716 |
| RP11-65I12.1 | CWH43     | 0.470508957 | 1.45E-25    |
| RP11-65I12.1 | SPX       | 0.514864106 | 0           |
| RP11-65I12.1 | APOD      | 0.130836527 | 0.006076846 |
| RP11-65I12.1 | DPP6      | 0.494991305 | 0           |
| RP11-65I12.1 | MMRN1     | 0.404607721 | 0           |
| RP11-65I12.1 | WDR72     | 0.530972123 | 0           |
| RP11-65I12.1 | MPPED2    | 0.542405189 | 0           |
| RP11-65I12.1 | PAPSS2    | 0.454083207 | 0           |
| RP11-65I12.1 | DCN       | 0.134513796 | 0.004783716 |
| RP11-65I12.1 | SORBS2    | 0.592514829 | 0           |
| RP11-65I12.1 | EGR2      | 0.402453499 | 0           |
| RP11-65I12.1 | EDN3      | 0.326738947 | 2.22E-12    |
| RP11-65I12.1 | DIO2      | 0.445561065 | 0           |
| RP11-65I12.1 | ITPR1     | 0.63520426  | 0           |
| RP11-65I12.1 | CFD       | 0.107592683 | 0.024209695 |
| RP11-65I12.1 | CPXM1     | 0.314443133 | 2.02E-11    |
| RP11-65I12.1 | ELMO1     | 0.505797309 | 0           |
| RP11-65I12.1 | GPC3      | 0.383600946 | 7.72E-17    |
| RP11-65I12.1 | MYOC      | 0.224779975 | 1.96E-06    |

|              |            |             |             |
|--------------|------------|-------------|-------------|
| RP11-65I12.1 | DEPTOR     | 0.503268069 | 0           |
| RP11-65I12.1 | DGKI       | 0.614002871 | 0           |
| RP11-65I12.1 | CARTPT     | 0.376596961 | 3.06E-16    |
| RP11-65I12.1 | IYD        | 0.504004204 | 0           |
| RP11-65I12.1 | LYVE1      | 0.360650408 | 7.79E-15    |
| RP11-65I12.1 | CLCNKB     | 0.457036682 | 0           |
| RP11-65I12.1 | NCAM1      | 0.384687831 | 0           |
| RP11-65I12.1 | HBA2       | 0.132514177 | 0.005452275 |
| RP11-65I12.1 | GLT8D2     | 0.384367137 | 0           |
| RP11-65I12.1 | OGDHL      | 0.402379318 | 0           |
| RP11-65I12.1 | LIFR       | 0.55659415  | 0           |
| RP11-65I12.1 | CSGALNACT1 | 0.565200118 | 0           |
| RP11-65I12.1 | RAP1GAP    | 0.445259094 | 0           |
| RP11-65I12.1 | COL9A3     | 0.393054803 | 0           |
| RP11-65I12.1 | FBLN1      | 0.124457686 | 0.009080079 |
| RP11-65I12.1 | EFEMP1     | 0.414488663 | 0           |
| RP11-65I12.1 | AOX1       | 0.418625712 | 4.70E-20    |
| RP11-65I12.1 | GRIN2C     | 0.49483883  | 0           |
| RP11-65I12.1 | C11orf74   | 0.309798818 | 4.08E-11    |
| RP11-65I12.1 | PPARGC1A   | 0.487225722 | 0           |
| RP11-65I12.1 | ANGPTL1    | 0.543190257 | 0           |
| RP11-65I12.1 | SCARA5     | 0.234474283 | 6.76E-07    |
| RP11-65I12.1 | LTF        | 0.365058281 | 3.19E-15    |
| RP11-65I12.1 | CA4        | 0.406041555 | 7.44E-19    |
| RP11-65I12.1 | TG         | 0.501147179 | 0           |
| RP11-65I12.1 | FCGBP      | 0.413147309 | 0           |
| RP11-65I12.1 | PBX4       | 0.496899298 | 0           |
| RP11-65I12.1 | CYR61      | 0.330242797 | 1.68E-12    |
| RP11-65I12.1 | FOS        | 0.398061654 | 0           |
| RP11-65I12.1 | KHDRBS2    | 0.4858343   | 0           |
| RP11-65I12.1 | MUM1L1     | 0.453049356 | 0           |
| RP11-65I12.1 | RGS16      | 0.457960467 | 0           |
| RP11-65I12.1 | MT1M       | 0.320667939 | 7.72E-12    |
| RP11-65I12.1 | LRP2       | 0.593559601 | 0           |
| RP11-65I12.1 | MAFB       | 0.434672512 | 0           |
| RP11-65I12.1 | KCNK2      | 0.497531183 | 0           |
| RP11-65I12.1 | TBC1D4     | 0.583573842 | 0           |
| RP11-65I12.1 | MIOX       | 0.428836639 | 4.58E-21    |
| RP11-65I12.1 | TPPP       | 0.496804409 | 0           |
| RP11-65I12.1 | FMOD       | 0.477683913 | 0           |
| RP11-65I12.1 | CITED2     | 0.470870767 | 0           |
| RP11-65I12.1 | RGS8       | 0.490362351 | 6.15E-28    |
| RP11-65I12.1 | ABI3BP     | 0.367725528 | 1.81E-15    |
| RP11-65I12.1 | ADH1B      | 0.293852086 | 3.42E-10    |
| RP11-65I12.1 | OGN        | 0.203712616 | 1.70E-05    |
| RP11-65I12.1 | NR4A1      | 0.355373216 | 2.15E-14    |
| RP11-65I12.1 | FOXJ1      | 0.426343301 | 8.14E-21    |
| RP11-65I12.1 | ALDH1A1    | 0.440379471 | 0           |
| RP11-65I12.1 | OCA2       | 0.463127271 | 1.01E-24    |
| RP11-65I12.1 | TMEM139    | 0.349597183 | 6.19E-14    |
| RP11-65I12.1 | ARHGAP24   | 0.469683164 | 0           |

|              |          |             |             |
|--------------|----------|-------------|-------------|
| RP11-65I12.1 | SLC25A15 | 0.654528718 | 0           |
| RP11-65I12.1 | DES      | 0.181321687 | 0.000133457 |
| RP11-65I12.1 | GDF10    | 0.382029635 | 1.05E-16    |
| RP11-65I12.1 | KIAA1324 | 0.416963863 | 0           |
| RP11-65I12.1 | JUN      | 0.392512276 | 0           |
| RP11-65I12.1 | C7       | 0.125471679 | 0.008528215 |
| RP11-65I12.1 | LGI3     | 0.388350633 | 0           |
| RP11-65I12.1 | CDON     | 0.572673942 | 0           |
| RP11-65I12.1 | BCL2     | 0.589901622 | 0           |
| RP11-65I12.1 | HLF      | 0.458297898 | 0           |
| RP11-65I12.1 | EGR1     | 0.434175089 | 0           |
| RP11-65I12.1 | IP6K3    | 0.445038963 | 0           |
| RP11-65I12.1 | SCUBE3   | 0.536196978 | 0           |
| RP11-65I12.1 | PKNOX2   | 0.471743065 | 0           |
| RP11-65I12.1 | SMAD9    | 0.634387278 | 0           |
| RP11-65I12.1 | IQGAP2   | 0.569735644 | 0           |
| RP11-65I12.1 | GNA14    | 0.537618753 | 0           |
| RP11-65I12.1 | LAYN     | 0.429847355 | 0           |
| RP11-65I12.1 | AVPR1A   | 0.494220704 | 0           |
| RP11-65I12.1 | PDLIM3   | 0.369859184 | 1.12E-15    |
| RP11-65I12.1 | GPM6A    | 0.452311094 | 0           |
| RP11-65I12.1 | SDPR     | 0.395116831 | 0           |
| RP11-65I12.1 | CRYAB    | 0.166902873 | 0.000452843 |
| RP11-65I12.1 | FOXA2    | 0.379131972 | 1.87E-16    |
| RP11-65I12.1 | C8orf88  | 0.480673414 | 0           |
| RP11-65I12.1 | ISM1     | 0.450377145 | 0           |
| RP11-65I12.1 | BMP2     | 0.363204753 | 4.67E-15    |
| RP11-65I12.1 | ID4      | 0.565375854 | 0           |
| RP11-65I12.1 | NUPR1    | 0.123314762 | 0.009740044 |
| RP11-65I12.1 | SERTM1   | 0.393322403 | 1.08E-17    |
| RP11-65I12.1 | IRS1     | 0.539914103 | 0           |
| RP11-65I12.1 | FIBIN    | 0.214955307 | 5.81E-06    |
| RP11-65I12.1 | PODN     | 0.189382356 | 6.72E-05    |
| RP11-65I12.1 | TDRD9    | 0.401389862 | 0           |
| RP11-65I12.1 | EPHA3    | 0.380234287 | 5.24E-17    |
| RP11-65I12.1 | AIF1L    | 0.431099209 | 0           |
| RP11-65I12.1 | EBF4     | 0.446186283 | 0           |
| RP11-65I12.1 | ADM2     | 0.41366232  | 0           |
| RP11-65I12.1 | GSTM3    | 0.370671485 | 9.29E-16    |
| RP11-65I12.1 | HSD17B6  | 0.418738671 | 0           |
| RP11-65I12.1 | AGR3     | 0.374217707 | 4.85E-16    |
| RP11-65I12.1 | EPHB1    | 0.390035942 | 0           |
| RP11-65I12.1 | TMOD1    | 0.313672532 | 2.27E-11    |
| RP11-65I12.1 | WASF3    | 0.637810375 | 0           |
| RP11-65I12.1 | SELV     | 0.44924633  | 3.42E-23    |
| RP11-65I12.1 | ENPP1    | 0.297061986 | 2.63E-10    |
| RP11-65I12.1 | SYNE1    | 0.645556975 | 4.08E-53    |
| RP11-65I12.1 | PLCH1    | 0.506433023 | 0           |
| RP11-65I12.1 | CCDC146  | 0.638127665 | 0           |
| RP11-65I12.1 | SLC16A2  | 0.53613542  | 0           |
| RP11-65I12.1 | IER2     | 0.315719951 | 1.66E-11    |

|              |          |              |             |
|--------------|----------|--------------|-------------|
| RP11-65I12.1 | KCNAB1   | 0.438217164  | 0           |
| RP11-65I12.1 | SYNDIG1  | 0.353411892  | 3.09E-14    |
| RP11-65I12.1 | C16orf89 | 0.313019798  | 2.51E-11    |
| RP11-65I12.1 | CTGF     | 0.301234409  | 1.44E-10    |
| RP11-65I12.1 | NR4A3    | 0.187095658  | 8.25E-05    |
| RP11-65I12.1 | KIAA1456 | 0.61349013   | 0           |
| RP11-65I12.1 | AQP4     | 0.390277916  | 0           |
| RP11-65I12.1 | RNF150   | 0.550079003  | 0           |
| RP11-65I12.1 | C1S      | 0.080450163  | 0.092263784 |
| RP11-65I12.1 | PFKFB2   | 0.510170715  | 0           |
| RP11-65I12.1 | PROX1    | 0.586123648  | 0           |
| RP11-65I12.1 | TCF7L1   | 0.548994942  | 0           |
| RP11-65I12.1 | HSPB6    | 0.219534661  | 3.63E-06    |
| RP11-65I12.1 | FHDC1    | 0.43518497   | 0           |
| RP11-65I12.1 | PRR15L   | 0.266069012  | 1.71E-08    |
| RP11-65I12.1 | SLC1A1   | 0.420882965  | 0           |
| RP11-65I12.1 | BTBD11   | 0.461000746  | 0           |
| RP11-65I12.1 | TRIM58   | 0.609081548  | 0           |
| RP11-65I12.1 | LRIG1    | 0.503382957  | 0           |
| RP11-65I12.1 | ROR2     | 0.432632469  | 0           |
| RP11-65I12.1 | GPR125   | 0.615577547  | 0           |
| RP11-65I12.1 | FLRT1    | 0.564511782  | 0           |
| RP11-65I12.1 | PGF      | 0.38939271   | 0           |
| RP11-65I12.1 | DUSP1    | 0.352259324  | 3.82E-14    |
| RP11-65I12.1 | PLA2G7   | 0.450027091  | 0           |
| RP11-65I12.1 | PLSCR4   | 0.522088155  | 0           |
| RP11-65I12.1 | FAM46B   | 0.226688642  | 1.70E-06    |
| RP11-65I12.1 | GLDC     | 0.474507329  | 0           |
| RP11-65I12.1 | ZBTB16   | 0.480335275  | 0           |
| RP11-65I12.1 | OMD      | 0.152369713  | 0.001364228 |
| RP11-65I12.1 | HSD11B2  | 0.385397158  | 0           |
| RP11-65I12.1 | FGL2     | 0.195828854  | 3.73E-05    |
| RP11-65I12.1 | CLCNKA   | 0.486784272  | 1.69E-27    |
| RP11-65I12.1 | GATM     | 0.372368567  | 6.18E-16    |
| RP11-65I12.1 | TNS3     | 0.575079642  | 0           |
| RP11-65I12.1 | TOB1     | 0.470793182  | 0           |
| RP11-65I12.1 | MARC2    | 0.512817112  | 0           |
| RP11-65I12.1 | LRRC2    | 0.56668033   | 0           |
| RP11-65I12.1 | SORD     | 0.439830561  | 0           |
| RP11-65I12.1 | RIMS4    | 0.436642914  | 0           |
| RP11-65I12.1 | SLC29A4  | 0.467561706  | 0           |
| RP11-65I12.1 | SLC39A14 | 0.523238879  | 0           |
| RP11-65I12.1 | FAXDC2   | 0.510663174  | 0           |
| RP11-65I12.1 | HSPB8    | 0.287248842  | 1.04E-09    |
| RP11-65I12.1 | CCL19    | -0.037323535 | 0.435357254 |
| RP11-65I12.1 | KCNIP3   | 0.43162656   | 0           |
| RP11-65I12.1 | CGNL1    | 0.519794506  | 0           |
| RP11-65I12.1 | ATF3     | 0.190715058  | 5.96E-05    |
| RP11-65I12.1 | SGCD     | 0.410721611  | 0           |
| RP11-65I12.1 | STARD13  | 0.651787432  | 0           |
| RP11-65I12.1 | LDHD     | 0.349698454  | 6.08E-14    |

|              |          |             |             |
|--------------|----------|-------------|-------------|
| RP11-65I12.1 | RCAN1    | 0.408097482 | 0           |
| RP11-65I12.1 | ID3      | 0.403184527 | 0           |
| RP11-65I12.1 | SYTL3    | 0.412422947 | 0           |
| RP11-65I12.1 | MT1E     | 0.195095556 | 3.99E-05    |
| RP11-65I12.1 | CAMK1D   | 0.420327672 | 0           |
| RP11-65I12.1 | PRKCQ    | 0.461746809 | 0           |
| RP11-65I12.1 | NUAK2    | 0.44034231  | 0           |
| RP11-65I12.1 | LIPG     | 0.548359795 | 0           |
| RP11-65I12.1 | SLC25A25 | 0.425532386 | 0           |
| RP11-65I12.1 | PRKX     | 0.413606862 | 0           |
| RP11-65I12.1 | SRPX     | 0.202884542 | 1.92E-05    |
| RP11-65I12.1 | FAM189A1 | 0.40972024  | 0           |
| RP11-65I12.1 | PLEKHH1  | 0.784429403 | 0           |
| RP11-65I12.1 | WNT11    | 0.355715753 | 2.01E-14    |
| RP11-65I12.1 | SNAI1    | 0.41074629  | 0           |
| RP11-65I12.1 | FDCSP    | 0.011375362 | 0.812138253 |
| RP11-65I12.1 | MT1X     | 0.122223609 | 0.010409553 |
| RP11-65I12.1 | ACACB    | 0.652650085 | 0           |
| RP11-65I12.1 | ARC      | 0.210136107 | 9.43E-06    |
| RP11-65I12.1 | KLK4     | 0.221384951 | 2.82E-06    |
| RP11-65I12.1 | ZFPM2    | 0.448291714 | 0           |
| RP11-65I12.1 | AKAP12   | 0.492708153 | 0           |
| RP11-65I12.1 | GJB6     | 0.415133372 | 1.02E-19    |
| RP11-65I12.1 | ERO1LB   | 0.615824911 | 0           |
| RP11-65I12.1 | DNALI1   | 0.450680818 | 0           |
| RP11-65I12.1 | HKDC1    | 0.374410879 | 3.67E-16    |
| RP11-65I12.1 | ZFP36L2  | 0.529335465 | 0           |
| RP11-65I12.1 | CAPSL    | 0.352684067 | 2.65E-14    |
| RP11-65I12.1 | CYP7B1   | 0.625766701 | 0           |
| RP11-65I12.1 | CPQ      | 0.523556169 | 0           |
| RP11-65I12.1 | RPS6KA6  | 0.588328953 | 3.12E-42    |
| RP11-65I12.1 | TLE1     | 0.421303653 | 0           |
| RP11-65I12.1 | TP53INP2 | 0.539432283 | 0           |
| RP11-65I12.1 | KATNAL2  | 0.559358272 | 0           |
| RP11-65I12.1 | SGPP2    | 0.432290925 | 0           |
| RP11-65I12.1 | CTH      | 0.540876043 | 0           |
| RP11-65I12.1 | KIF12    | 0.40146149  | 0           |
| RP11-65I12.1 | TMEM220  | 0.502670935 | 0           |
| RP11-65I12.1 | CENPJ    | 0.656643084 | 0           |
| RP11-65I12.1 | FAM155B  | 0.264783542 | 2.01E-08    |
| RP11-65I12.1 | WFS1     | 0.456617411 | 0           |
| RP11-65I12.1 | SELENBP1 | 0.323053356 | 5.31E-12    |
| RP11-65I12.1 | SNTA1    | 0.207279365 | 1.25E-05    |
| RP11-65I12.1 | FRAS1    | 0.515479537 | 0           |
| RP11-65I12.1 | FBLN7    | 0.428213533 | 0           |
| RP11-65I12.1 | AGPAT9   | 0.490710519 | 0           |
| RP11-65I12.1 | GPR83    | 0.417141726 | 0           |
| RP11-65I12.1 | PRTG     | 0.680767594 | 0           |
| RP11-65I12.1 | EGR3     | 0.225134674 | 2.01E-06    |
| RP11-65I12.1 | GRAMD2   | 0.525931232 | 0           |
| RP11-65I12.1 | HYOU1    | 0.552908938 | 0           |



|              |          |             |             |
|--------------|----------|-------------|-------------|
| RP11-65I12.1 | FBLN5    | 0.314159459 | 2.11E-11    |
| RP11-65I12.1 | ITM2A    | 0.47725287  | 0           |
| RP11-65I12.1 | SRF      | 0.359138566 | 1.05E-14    |
| RP11-65I12.1 | FGFR2    | 0.505941841 | 0           |
| RP11-65I12.1 | MT1A     | 0.06159384  | 0.197718788 |
| RP11-65I12.1 | MAMDC2   | 0.416515232 | 0           |
| RP11-65I12.1 | FHL2     | 0.24743133  | 1.66E-07    |
| RP11-65I12.1 | FTCDNL1  | 0.3427473   | 2.07E-13    |
| RP11-65I12.1 | PKIA     | 0.394809754 | 0           |
| RP11-65I12.1 | DNAJB4   | 0.552538459 | 0           |
| RP11-65I12.1 | SLC25A33 | 0.318734416 | 1.04E-11    |
| RP11-65I12.1 | EYA2     | 0.278970801 | 3.20E-09    |
| RP11-65I12.1 | LPAR1    | 0.26554308  | 1.83E-08    |
| RP11-65I12.1 | STX11    | 0.292212149 | 5.23E-10    |
| RP11-65I12.1 | ARHGEF28 | 0.461546252 | 0           |
| RP11-65I12.1 | OR2W3    | 0.462267635 | 0           |
| RP11-65I12.1 | ALDH1B1  | 0.311785967 | 2.37E-11    |
| RP11-65I12.1 | CXCL12   | 0.211653339 | 8.10E-06    |
| RP11-65I12.1 | OLFM2    | 0.351841897 | 4.12E-14    |
| RP11-65I12.1 | TUB      | 0.596124584 | 0           |
| RP11-65I12.1 | HTRA3    | 0.226549925 | 1.73E-06    |
| RP11-65I12.1 | CKB      | 0.165229195 | 0.000517256 |
| RP11-65I12.1 | RGS2     | 0.064223711 | 0.179141235 |
| RP11-65I12.1 | SHANK2   | 0.652166846 | 0           |
| RP11-65I12.1 | CNTFR    | 0.358254797 | 9.68E-15    |
| RP11-65I12.1 | CYTH3    | 0.585707923 | 0           |
| RP11-65I12.1 | PLAC9    | 0.131674359 | 0.005757317 |
| RP11-65I12.1 | WVOX     | 0.450062834 | 0           |
| RP11-65I12.1 | NPR3     | 0.524499244 | 0           |
| RP11-65I12.1 | SDC2     | 0.517573053 | 0           |
| RP11-65I12.1 | KLF15    | 0.390191111 | 0           |
| RP11-65I12.1 | TMEM164  | 0.604822888 | 0           |
| RP11-65I12.1 | LONRF3   | 0.523931754 | 0           |
| RP11-65I12.1 | GBP1     | 0.207612541 | 1.21E-05    |
| RP11-65I12.1 | ARHGAP6  | 0.535494458 | 0           |
| RP11-65I12.1 | TMEM119  | 0.096106571 | 0.044190561 |
| RP11-65I12.1 | SH3RF1   | 0.587743995 | 0           |
| RP11-65I12.1 | CRELD2   | 0.313224894 | 2.43E-11    |
| RP11-65I12.1 | PCP4     | 0.07723046  | 0.106085629 |
| RP11-65I12.1 | GCSH     | 0.428123183 | 0           |
| RP11-65I12.1 | IMPA2    | 0.434315792 | 0           |
| RP11-65I12.1 | C1R      | 0.008763407 | 0.854667012 |
| RP11-65I12.1 | SUCNR1   | 0.393560027 | 0           |
| RP11-65I12.1 | SFRP1    | 0.361196623 | 7.00E-15    |
| RP11-65I12.1 | UGT8     | 0.463613102 | 0           |
| RP11-65I12.1 | TLE4     | 0.322997614 | 5.36E-12    |
| RP11-65I12.1 | ANTXR1   | 0.495490288 | 0           |
| RP11-65I12.1 | GPX3     | 0.383435692 | 3.67E-19    |
| RP11-65I12.1 | DPY19L2  | 0.622913363 | 0           |
| RP11-65I12.1 | FAM46C   | 0.343156926 | 1.92E-13    |
| RP11-65I12.1 | IL33     | 0.316319508 | 1.17E-11    |

|              |          |             |             |
|--------------|----------|-------------|-------------|
| RP11-65I12.1 | PEG3     | 0.630992832 | 0           |
| RP11-65I12.1 | FAHD2A   | 0.450765637 | 0           |
| RP11-65I12.1 | PTGDS    | -0.03845233 | 0.421440807 |
| RP11-65I12.1 | CHCHD10  | 0.062243381 | 0.192944395 |
| RP11-65I12.1 | CD36     | 0.421381948 | 0           |
| RP11-65I12.1 | ANKRD37  | 0.361138895 | 7.08E-15    |
| RP11-65I12.1 | TSPAN33  | 0.242644468 | 2.89E-07    |
| RP11-65I12.1 | PRDM16   | 0.640837038 | 0           |
| RP11-65I12.1 | UST      | 0.408538595 | 0           |
| RP11-65I12.1 | NEXN     | 0.486679649 | 0           |
| RP11-65I12.1 | NUPR1L   | 0.124575526 | 0.008977995 |
| RP11-65I12.1 | SLC24A3  | 0.392594542 | 0           |
| RP11-65I12.1 | MARC1    | 0.499615621 | 0           |
| RP11-65I12.1 | MYH11    | 0.351594959 | 4.31E-14    |
| RP11-65I12.1 | APOA1    | 0.344248587 | 1.17E-13    |
| RP11-65I12.1 | TMEM178B | 0.52616427  | 0           |
| RP11-65I12.1 | CAPN6    | 0.295154627 | 2.83E-10    |
| RP11-65I12.1 | PPM1L    | 0.575341047 | 0           |
| RP11-65I12.1 | FZD8     | 0.493068845 | 0           |
| RP11-65I12.1 | RCAN2    | 0.467645674 | 0           |
| RP11-65I12.1 | COPZ2    | 0.281902291 | 2.16E-09    |
| RP11-65I12.1 | GAS1     | 0.252699302 | 8.88E-08    |
| RP11-65I12.1 | DACT1    | 0.501586165 | 0           |
| RP11-65I12.1 | WBSCR17  | 0.453102545 | 0           |
| RP11-65I12.1 | NCS1     | 0.387453797 | 0           |
| RP11-65I12.1 | SPIRE2   | 0.398852538 | 0           |
| RP11-65I12.1 | C15orf52 | 0.511137193 | 0           |
| RP11-65I12.1 | SPAG5    | 0.445826442 | 0           |
| RP11-65I12.1 | ARL4D    | 0.227696253 | 1.53E-06    |
| RP11-65I12.1 | FAM189A2 | 0.490648962 | 0           |
| RP11-65I12.1 | MAP1LC3A | 0.249451799 | 1.31E-07    |
| RP11-65I12.1 | KLF6     | 0.239693263 | 4.05E-07    |
| RP11-65I12.1 | ADD3     | 0.532930894 | 0           |
| RP11-65I12.1 | TSPAN7   | 0.326173064 | 3.23E-12    |
| RP11-65I12.1 | KLF9     | 0.367783965 | 1.78E-15    |
| RP11-65I12.1 | KCNQ1    | 0.324054159 | 4.53E-12    |
| RP11-65I12.1 | MAN1A1   | 0.319607565 | 9.11E-12    |
| RP11-65I12.1 | MLF1     | 0.27403728  | 6.13E-09    |
| RP11-65I12.1 | RARB     | 0.556585498 | 0           |
| RP11-65I12.1 | CDC42EP2 | 0.212913136 | 7.14E-06    |
| RP11-65I12.1 | FAM3B    | 0.220035488 | 3.44E-06    |
| RP11-65I12.1 | GADD45B  | 0.117400863 | 0.013882747 |
| RP11-65I12.1 | TMEM47   | 0.477177129 | 0           |
| RP11-65I12.1 | SDF2L1   | 0.189301225 | 6.77E-05    |
| RP11-65I12.1 | CCDC85A  | 0.61897412  | 0           |
| RP11-65I12.1 | CRYBG3   | 0.586922191 | 0           |
| RP11-65I12.1 | FBLN2    | 0.122376368 | 0.01031343  |
| RP11-65I12.1 | PEBP4    | 0.010066039 | 0.833359451 |
| RP11-65I12.1 | CDADC1   | 0.499630656 | 0           |
| RP11-65I12.1 | FAM63A   | 0.548102645 | 0           |
| RP11-65I12.1 | GLUL     | 0.476015057 | 0           |

|              |          |              |             |
|--------------|----------|--------------|-------------|
| RP11-65I12.1 | FREM2    | 0.538816568  | 0           |
| RP11-65I12.1 | ACKR3    | 0.494032628  | 0           |
| RP11-65I12.1 | DENND6A  | 0.593481733  | 0           |
| RP11-65I12.1 | CLDN8    | 0.301949693  | 1.30E-10    |
| RP11-65I12.1 | UTS2R    | 0.435030572  | 1.07E-21    |
| RP11-65I12.1 | SCNN1B   | 0.285165964  | 1.39E-09    |
| RP11-65I12.1 | TTC30A   | 0.590405711  | 0           |
| RP11-65I12.1 | CORO2B   | 0.476003569  | 0           |
| RP11-65I12.1 | TC2N     | 0.438475166  | 0           |
| RP11-65I12.1 | ALDH2    | 0.2468315    | 1.78E-07    |
| RP11-65I12.1 | GPR183   | 0.001183347  | 0.980268804 |
| RP11-65I12.1 | C4orf47  | 0.428154103  | 0           |
| RP11-65I12.1 | SLC25A42 | 0.410488856  | 0           |
| RP11-65I12.1 | LGMN     | 0.381136087  | 3.28E-17    |
| RP11-65I12.1 | ACSF2    | 0.345418661  | 1.30E-13    |
| RP11-65I12.1 | KIAA1467 | 0.498291714  | 0           |
| RP11-65I12.1 | PRKG1    | 0.483708729  | 0           |
| RP11-65I12.1 | GNAI1    | 0.500017446  | 0           |
| RP11-65I12.1 | ABCC4    | 0.392464335  | 0           |
| RP11-65I12.1 | PRPS1    | 0.442295549  | 0           |
| RP11-65I12.1 | TSPAN5   | 0.39802818   | 0           |
| RP11-65I12.1 | CR2      | 0.14996825   | 0.001626772 |
| RP11-65I12.1 | CCDC170  | 0.558718303  | 0           |
| RP11-65I12.1 | RRAD     | -0.03292905  | 0.491202825 |
| RP11-65I12.1 | SCGB2A1  | 0.21888604   | 3.88E-06    |
| RP11-65I12.1 | SESN3    | 0.392657943  | 0           |
| RP11-65I12.1 | SGK223   | 0.405606396  | 0           |
| RP11-65I12.1 | NDRG2    | 0.401958487  | 0           |
| RP11-65I12.1 | C3orf52  | 0.39309012   | 0           |
| RP11-65I12.1 | FLRT3    | -0.061706669 | 0.196816208 |
| RP11-65I12.1 | MST1R    | -0.229947634 | 1.20E-06    |
| RP11-65I12.1 | SDC1     | -0.365866611 | 2.69E-15    |
| RP11-65I12.1 | ST8SIA4  | -0.232879407 | 8.69E-07    |
| RP11-65I12.1 | UBTD1    | -0.557340497 | 0           |
| RP11-65I12.1 | EPHA2    | -0.117244417 | 0.014010768 |
| RP11-65I12.1 | TMEM130  | -0.201493829 | 2.19E-05    |
| RP11-65I12.1 | SPINK2   | -0.517637447 | 0           |
| RP11-65I12.1 | MMP16    | -0.147432606 | 0.00197223  |
| RP11-65I12.1 | SIGLEC15 | -0.315964478 | 1.60E-11    |
| RP11-65I12.1 | RIN1     | -0.519874077 | 0           |
| RP11-65I12.1 | IL1RN    | -0.37050582  | 9.66E-16    |
| RP11-65I12.1 | FCER1G   | -0.331634503 | 1.34E-12    |
| RP11-65I12.1 | CD276    | -0.418044094 | 0           |
| RP11-65I12.1 | CTSB     | -0.420120448 | 0           |
| RP11-65I12.1 | FAM171A2 | -0.132928767 | 0.005307118 |
| RP11-65I12.1 | ASPHD1   | -0.47803652  | 0           |
| RP11-65I12.1 | C15orf48 | -0.387602726 | 0           |
| RP11-65I12.1 | DYSF     | -0.072167158 | 0.131075785 |
| RP11-65I12.1 | PDZRN4   | -0.128324308 | 0.007132633 |
| RP11-65I12.1 | EFHD2    | -0.268543645 | 1.25E-08    |
| RP11-65I12.1 | ASF1B    | -0.360912098 | 7.40E-15    |

|              |          |              |             |
|--------------|----------|--------------|-------------|
| RP11-65I12.1 | AQP1     | -0.205768516 | 1.45E-05    |
| RP11-65I12.1 | ARRDC2   | -0.357840331 | 1.34E-14    |
| RP11-65I12.1 | PRSS1    | -0.352488586 | 2.74E-14    |
| RP11-65I12.1 | MAPK13   | -0.289485613 | 7.65E-10    |
| RP11-65I12.1 | CST5     | -0.375676181 | 3.66E-16    |
| RP11-65I12.1 | AHR      | -0.190186289 | 6.25E-05    |
| RP11-65I12.1 | BAX      | -0.488914152 | 0           |
| RP11-65I12.1 | C1orf115 | -0.197540119 | 3.18E-05    |
| RP11-65I12.1 | PLK3     | -0.319562461 | 9.18E-12    |
| RP11-65I12.1 | JAG2     | -0.163667851 | 0.00058493  |
| RP11-65I12.1 | RAD23B   | -0.298056831 | 2.28E-10    |
| RP11-65I12.1 | CA12     | 0.082276458  | 0.085089139 |
| RP11-65I12.1 | ADTRP    | -0.254104057 | 7.50E-08    |
| RP11-65I12.1 | UCP2     | -0.343131537 | 1.93E-13    |
| RP11-65I12.1 | IGFBP2   | -0.302085573 | 1.28E-10    |
| RP11-65I12.1 | LOXL2    | -0.164385406 | 0.000552868 |
| RP11-65I12.1 | GPX1     | -0.600520259 | 0           |
| RP11-65I12.1 | P3H3     | -0.529993022 | 0           |
| RP11-65I12.1 | C2orf81  | -0.395844172 | 0           |
| RP11-65I12.1 | CDT1     | -0.468135863 | 0           |
| RP11-65I12.1 | SNX25    | -0.057981459 | 0.225261775 |
| RP11-65I12.1 | MTHFD1L  | -0.285943515 | 1.25E-09    |
| RP11-65I12.1 | CDC42BPG | -0.199055159 | 2.66E-05    |
| RP11-65I12.1 | MSN      | -0.253725494 | 7.85E-08    |
| RP11-65I12.1 | SIGLEC6  | -0.255688367 | 5.56E-08    |
| RP11-65I12.1 | F2R      | 0.103303529  | 0.030497889 |
| RP11-65I12.1 | TMEM184A | -0.277653844 | 3.81E-09    |
| RP11-65I12.1 | CKS2     | -0.314774465 | 1.92E-11    |
| RP11-65I12.1 | TAX1BP3  | -0.604837214 | 0           |
| RP11-65I12.1 | PMEPA1   | -0.399746253 | 0           |
| RP11-65I12.1 | CXCL16   | -0.40648607  | 0           |
| RP11-65I12.1 | FAXC     | -0.306034177 | 7.15E-11    |
| RP11-65I12.1 | VTCN1    | -0.31617964  | 1.20E-11    |
| RP11-65I12.1 | SH2D4A   | -0.254752962 | 6.94E-08    |
| RP11-65I12.1 | RNF24    | -0.154347166 | 0.001191864 |
| RP11-65I12.1 | LY6G6C   | -0.342387439 | 1.61E-13    |
| RP11-65I12.1 | NID1     | -0.006832436 | 0.88644344  |
| RP11-65I12.1 | STAC     | -0.349104582 | 6.76E-14    |
| RP11-65I12.1 | RAB34    | -0.576070374 | 0           |
| RP11-65I12.1 | HES4     | -0.294693873 | 3.69E-10    |
| RP11-65I12.1 | EPHA10   | -0.38662717  | 0           |
| RP11-65I12.1 | ENTPD2   | -0.410064195 | 0           |
| RP11-65I12.1 | DDB2     | -0.388509348 | 0           |
| RP11-65I12.1 | NKAIN4   | -0.220463978 | 3.29E-06    |
| RP11-65I12.1 | TRIM29   | -0.230634267 | 1.11E-06    |
| RP11-65I12.1 | ADCY8    | -0.408085301 | 4.79E-19    |
| RP11-65I12.1 | SFTA2    | -0.360448007 | 8.11E-15    |
| RP11-65I12.1 | NRIP1    | -0.134428411 | 0.004810678 |
| RP11-65I12.1 | VWA1     | -0.230169325 | 1.17E-06    |
| RP11-65I12.1 | APLNR    | -0.104910118 | 0.027995311 |
| RP11-65I12.1 | REN      | -0.464508566 | 7.03E-25    |

|              |          |              |             |
|--------------|----------|--------------|-------------|
| RP11-65I12.1 | EDIL3    | -0.085339998 | 0.074069956 |
| RP11-65I12.1 | AGRN     | -0.1494179   | 0.001710305 |
| RP11-65I12.1 | TREM1    | -0.357008031 | 1.58E-14    |
| RP11-65I12.1 | SRL      | -0.101125194 | 0.0341954   |
| RP11-65I12.1 | RASGRF1  | -0.325359486 | 3.68E-12    |
| RP11-65I12.1 | RMI2     | -0.493270537 | 0           |
| RP11-65I12.1 | SAMD1    | -0.556523941 | 0           |
| RP11-65I12.1 | MGAT4B   | -0.430395555 | 0           |
| RP11-65I12.1 | NXN      | -0.356668189 | 1.68E-14    |
| RP11-65I12.1 | SH3BGRL3 | -0.620348097 | 0           |
| RP11-65I12.1 | CA11     | -0.463593671 | 0           |
| RP11-65I12.1 | PLD3     | -0.343249262 | 1.89E-13    |
| RP11-65I12.1 | LURAP1L  | -0.350154035 | 5.60E-14    |
| RP11-65I12.1 | CARNS1   | -0.083486186 | 0.080589481 |
| RP11-65I12.1 | PDLIM7   | -0.432907491 | 0           |
| RP11-65I12.1 | BCL2L1   | -0.467193923 | 0           |
| RP11-65I12.1 | GGT6     | -0.278759606 | 3.29E-09    |
| RP11-65I12.1 | DPYSL3   | -0.114518591 | 0.0164142   |
| RP11-65I12.1 | FYN      | -0.383713551 | 0           |
| RP11-65I12.1 | TK1      | -0.436410443 | 0           |
| RP11-65I12.1 | AK1      | -0.456073466 | 0           |
| RP11-65I12.1 | HIGD1B   | -0.220139171 | 3.41E-06    |
| RP11-65I12.1 | TMEM59L  | -0.213823163 | 6.51E-06    |
| RP11-65I12.1 | MEGF9    | -0.09402043  | 0.049016312 |
| RP11-65I12.1 | ZFP36L1  | -0.124936812 | 0.008815472 |
| RP11-65I12.1 | ADRA1B   | -0.172879038 | 0.000278819 |
| RP11-65I12.1 | EPHA4    | -0.09706     | 0.042121951 |
| RP11-65I12.1 | TCERG1L  | -0.010635515 | 0.824081605 |
| RP11-65I12.1 | NGFR     | -0.280225067 | 2.70E-09    |
| RP11-65I12.1 | EBI3     | -0.474319253 | 0           |
| RP11-65I12.1 | S100A10  | -0.423444827 | 0           |
| RP11-65I12.1 | S100B    | -0.397918682 | 0           |
| RP11-65I12.1 | CD44     | -0.168738671 | 0.000390821 |
| RP11-65I12.1 | BHLHE41  | -0.193150259 | 4.78E-05    |
| RP11-65I12.1 | FBXO2    | -0.498344761 | 0           |
| RP11-65I12.1 | SLC30A2  | -0.253289061 | 8.28E-08    |
| RP11-65I12.1 | FRMD5    | -0.399026288 | 0           |
| RP11-65I12.1 | SAMD11   | -0.194895565 | 4.07E-05    |
| RP11-65I12.1 | SIPA1L2  | -0.123289799 | 0.009754923 |
| RP11-65I12.1 | S100A16  | -0.538729338 | 0           |
| RP11-65I12.1 | PPL      | -0.205171382 | 1.54E-05    |
| RP11-65I12.1 | ARHGD1B  | -0.267867933 | 1.36E-08    |
| RP11-65I12.1 | CDC42EP3 | -0.321712144 | 6.56E-12    |
| RP11-65I12.1 | RUNX2    | -0.326939552 | 2.86E-12    |
| RP11-65I12.1 | LAMC2    | -0.251279087 | 1.05E-07    |
| RP11-65I12.1 | BRINP1   | -0.417248955 | 0           |
| RP11-65I12.1 | GPRC5B   | -0.216244465 | 5.09E-06    |
| RP11-65I12.1 | AQP5     | -0.101362487 | 0.033774898 |
| RP11-65I12.1 | PLAG1    | -0.089926869 | 0.059771661 |
| RP11-65I12.1 | PTPRU    | -0.282666084 | 1.95E-09    |
| RP11-65I12.1 | ANGPTL4  | -0.322949106 | 5.40E-12    |

|              |          |              |             |
|--------------|----------|--------------|-------------|
| RP11-65I12.1 | PALM3    | -0.286656814 | 1.13E-09    |
| RP11-65I12.1 | ACP5     | -0.359886615 | 9.05E-15    |
| RP11-65I12.1 | DLG4     | -0.194358854 | 4.27E-05    |
| RP11-65I12.1 | ETNK2    | -0.433442217 | 0           |
| RP11-65I12.1 | CD109    | -0.175270129 | 0.000228624 |
| RP11-65I12.1 | SNX22    | -0.26261698  | 2.64E-08    |
| RP11-65I12.1 | TMEM98   | -0.322180207 | 6.09E-12    |
| RP11-65I12.1 | CTHRC1   | -0.276098316 | 4.68E-09    |
| RP11-65I12.1 | S100A2   | -0.415592298 | 0           |
| RP11-65I12.1 | C11orf80 | -0.51747164  | 0           |
| RP11-65I12.1 | SREBF1   | -0.277678665 | 3.80E-09    |
| RP11-65I12.1 | PRSS22   | -0.358727806 | 1.13E-14    |
| RP11-65I12.1 | CMTM3    | -0.46513232  | 0           |
| RP11-65I12.1 | RDH5     | -0.304511981 | 8.95E-11    |
| RP11-65I12.1 | MYH10    | -0.141712882 | 0.002945376 |
| RP11-65I12.1 | EVPL     | -0.239989561 | 3.92E-07    |
| RP11-65I12.1 | SCD      | -0.252496192 | 9.10E-08    |
| RP11-65I12.1 | CD151    | -0.464263    | 0           |
| RP11-65I12.1 | S100A4   | -0.463952802 | 0           |
| RP11-65I12.1 | BNIP1    | -0.284600459 | 1.50E-09    |
| RP11-65I12.1 | MAP3K6   | -0.411425123 | 0           |
| RP11-65I12.1 | MANEAL   | -0.416930247 | 0           |
| RP11-65I12.1 | CD207    | -0.351103316 | 3.51E-14    |
| RP11-65I12.1 | CD1A     | -0.35024581  | 4.08E-14    |
| RP11-65I12.1 | C3       | -0.26735817  | 1.45E-08    |
| RP11-65I12.1 | NT5E     | -0.235371486 | 6.59E-07    |
| RP11-65I12.1 | CACNG4   | -0.323441368 | 3.78E-12    |
| RP11-65I12.1 | FHOD1    | -0.27834686  | 3.47E-09    |
| RP11-65I12.1 | LEMD1    | -0.445285476 | 0           |
| RP11-65I12.1 | ATP11A   | 0.073397595  | 0.124619655 |
| RP11-65I12.1 | PPAP2C   | -0.376286392 | 2.17E-16    |
| RP11-65I12.1 | DRAM1    | -0.270535038 | 9.66E-09    |
| RP11-65I12.1 | CDA      | -0.274267766 | 5.95E-09    |
| RP11-65I12.1 | CCND2    | -0.27141996  | 8.62E-09    |
| RP11-65I12.1 | LCN6     | -0.206620539 | 1.28E-05    |
| RP11-65I12.1 | CDH4     | -0.343105581 | 1.94E-13    |
| RP11-65I12.1 | MMP11    | -0.422366439 | 0           |
| RP11-65I12.1 | B3GAT1   | -0.082581124 | 0.083937255 |
| RP11-65I12.1 | SPP1     | -0.185100435 | 9.84E-05    |
| RP11-65I12.1 | HLA-DQB1 | -0.3812436   | 3.07E-17    |
| RP11-65I12.1 | SDC3     | -0.35250995  | 3.65E-14    |
| RP11-65I12.1 | CX3CL1   | -0.266795502 | 1.56E-08    |
| RP11-65I12.1 | SDK1     | -0.210655373 | 8.95E-06    |
| RP11-65I12.1 | DOCK9    | -0.080513848 | 0.092005689 |
| RP11-65I12.1 | CSF2     | -0.466384493 | 4.30E-25    |
| RP11-65I12.1 | GRHL3    | -0.334822576 | 7.90E-13    |
| RP11-65I12.1 | TMEM92   | -0.458014853 | 3.76E-24    |
| RP11-65I12.1 | BASP1    | -0.427979218 | 0           |
| RP11-65I12.1 | HRH1     | -0.249760721 | 1.26E-07    |
| RP11-65I12.1 | ESM1     | 0.043808951  | 0.359671084 |
| RP11-65I12.1 | B4GALNT3 | -0.312154307 | 2.86E-11    |

|              |          |              |             |
|--------------|----------|--------------|-------------|
| RP11-65I12.1 | LMO3     | -0.106246507 | 0.026050153 |
| RP11-65I12.1 | C9orf16  | -0.641234749 | 0           |
| RP11-65I12.1 | SEMA3F   | -0.207164335 | 1.26E-05    |
| RP11-65I12.1 | PLA2G12B | -0.288735075 | 7.08E-10    |
| RP11-65I12.1 | KLK6     | -0.297425659 | 2.04E-10    |
| RP11-65I12.1 | ST3GAL5  | -0.315324084 | 1.77E-11    |
| RP11-65I12.1 | FAM132B  | -0.147552884 | 0.001955372 |
| RP11-65I12.1 | CDKN1A   | -0.182125117 | 0.000127596 |
| RP11-65I12.1 | E2F1     | -0.452743272 | 0           |
| RP11-65I12.1 | B3GNT8   | -0.451357807 | 0           |
| RP11-65I12.1 | MTMR11   | -0.286773546 | 1.11E-09    |
| RP11-65I12.1 | MYO1G    | -0.268991283 | 1.18E-08    |
| RP11-65I12.1 | TMSB10   | -0.598686021 | 0           |
| RP11-65I12.1 | UNC5CL   | -0.346772212 | 1.02E-13    |
| RP11-65I12.1 | ABR      | -0.268925187 | 1.19E-08    |
| RP11-65I12.1 | PLP2     | -0.593908663 | 0           |
| RP11-65I12.1 | SRCIN1   | -0.334536632 | 8.28E-13    |
| RP11-65I12.1 | PDE9A    | -0.471417265 | 0           |
| RP11-65I12.1 | TREM2    | -0.363644307 | 4.27E-15    |
| RP11-65I12.1 | KDEL3    | -0.267930908 | 1.35E-08    |
| RP11-65I12.1 | PC       | -0.400233606 | 0           |
| RP11-65I12.1 | C2CD4A   | -0.394983221 | 0           |
| RP11-65I12.1 | PELI1    | -0.227657248 | 1.54E-06    |
| RP11-65I12.1 | SSX1     | -0.171593001 | 0.000309905 |
| RP11-65I12.1 | MROH6    | -0.457237523 | 0           |
| RP11-65I12.1 | ESPN     | -0.451700485 | 0           |
| RP11-65I12.1 | BMP1     | -0.266855074 | 1.55E-08    |
| RP11-65I12.1 | TM4SF4   | -0.307901114 | 4.29E-11    |
| RP11-65I12.1 | CORO2A   | -0.280309886 | 2.67E-09    |
| RP11-65I12.1 | CD164L2  | -0.519178242 | 1.14E-31    |
| RP11-65I12.1 | CTSS     | -0.257007322 | 5.27E-08    |
| RP11-65I12.1 | CLU      | -0.392712834 | 0           |
| RP11-65I12.1 | TMSB4X   | -0.496913766 | 0           |
| RP11-65I12.1 | WNT10A   | -0.348863401 | 5.22E-14    |
| RP11-65I12.1 | NAPSA    | -0.270585958 | 9.60E-09    |
| RP11-65I12.1 | PLEKHA4  | -0.359875127 | 9.07E-15    |
| RP11-65I12.1 | SFTPA1   | -0.094879882 | 0.046947848 |
| RP11-65I12.1 | C1orf116 | -0.310382194 | 3.74E-11    |
| RP11-65I12.1 | TM4SF1   | -0.310342905 | 3.76E-11    |
| RP11-65I12.1 | SEL1L3   | -0.168704062 | 0.000391913 |
| RP11-65I12.1 | VASN     | -0.477140251 | 0           |
| RP11-65I12.1 | NPTXR    | -0.394644514 | 0           |
| RP11-65I12.1 | PDE4C    | -0.265523365 | 1.83E-08    |
| RP11-65I12.1 | CDC42EP1 | -0.450772587 | 0           |
| RP11-65I12.1 | ENDOD1   | -0.377358539 | 1.56E-16    |
| RP11-65I12.1 | RYR1     | -0.426999833 | 0           |
| RP11-65I12.1 | IL1RAP   | -0.193348122 | 4.69E-05    |
| RP11-65I12.1 | SLC35F2  | -0.309196872 | 3.52E-11    |
| RP11-65I12.1 | ISYNA1   | -0.394052911 | 0           |
| RP11-65I12.1 | HLA-G    | -0.340490671 | 3.04E-13    |
| RP11-65I12.1 | CDKN2B   | -0.320620282 | 7.78E-12    |

|              |          |              |             |
|--------------|----------|--------------|-------------|
| RP11-65I12.1 | ALDH1A3  | -0.223201434 | 2.47E-06    |
| RP11-65I12.1 | CLIP3    | -0.310788416 | 3.52E-11    |
| RP11-65I12.1 | ULBP2    | -0.320006837 | 8.56E-12    |
| RP11-65I12.1 | ETHE1    | -0.537205014 | 0           |
| RP11-65I12.1 | XPR1     | -0.165562796 | 0.000503774 |
| RP11-65I12.1 | SPTBN2   | -0.359205939 | 1.03E-14    |
| RP11-65I12.1 | IVL      | -0.414172537 | 1.26E-19    |
| RP11-65I12.1 | MARCO    | -0.345559221 | 1.27E-13    |
| RP11-65I12.1 | PLXND1   | -0.175409413 | 0.000225978 |
| RP11-65I12.1 | EMILIN2  | -0.353109637 | 3.27E-14    |
| RP11-65I12.1 | PLAUR    | -0.419040784 | 0           |
| RP11-65I12.1 | CDC42EP5 | -0.499829512 | 0           |
| RP11-65I12.1 | TRPC5    | -0.155234869 | 0.001102161 |
| RP11-65I12.1 | TMEM100  | -0.3006516   | 1.57E-10    |
| RP11-65I12.1 | QSOX1    | -0.386787729 | 0           |
| RP11-65I12.1 | ARHGAP23 | -0.221127917 | 3.07E-06    |
| RP11-65I12.1 | MDF1     | -0.237365858 | 5.27E-07    |
| RP11-65I12.1 | FSTL3    | -0.422618058 | 0           |
| RP11-65I12.1 | INF2     | -0.415592581 | 0           |
| RP11-65I12.1 | TGFBR1   | -0.32421018  | 4.42E-12    |
| RP11-65I12.1 | TGFBI    | -0.230934962 | 1.08E-06    |
| RP11-65I12.1 | ERBB3    | -0.37918767  | 8.18E-17    |
| RP11-65I12.1 | CCL18    | -0.207842317 | 1.18E-05    |
| RP11-65I12.1 | CCL17    | -0.381090216 | 1.27E-16    |
| RP11-65I12.1 | C16orf45 | -0.29922103  | 1.93E-10    |
| RP11-65I12.1 | PRDM1    | -0.115666762 | 0.015360985 |
| RP11-65I12.1 | TRIM47   | -0.542642482 | 0           |
| RP11-65I12.1 | CNFN     | -0.512221822 | 0           |
| RP11-65I12.1 | ARMCX3   | -0.230735539 | 1.10E-06    |
| RP11-65I12.1 | RAMP1    | -0.403404091 | 0           |
| RP11-65I12.1 | GABRD    | -0.116890817 | 0.014303956 |
| RP11-65I12.1 | COL13A1  | -0.172853082 | 0.000279417 |
| RP11-65I12.1 | S100A5   | -0.470837435 | 0           |
| RP11-65I12.1 | MISP     | -0.341948473 | 2.37E-13    |
| RP11-65I12.1 | HES6     | -0.30428802  | 9.24E-11    |
| RP11-65I12.1 | PSD3     | -0.145881192 | 0.002201936 |
| RP11-65I12.1 | DOK7     | -0.356596987 | 1.70E-14    |
| RP11-65I12.1 | ZMAT3    | -0.208543134 | 1.10E-05    |
| RP11-65I12.1 | MFAP2    | -0.331106443 | 1.46E-12    |
| RP11-65I12.1 | TMEM79   | -0.466080359 | 0           |
| RP11-65I12.1 | SLC1A5   | -0.438963653 | 0           |
| RP11-65I12.1 | BBC3     | -0.428084745 | 0           |
| RP11-65I12.1 | HLA-DQB2 | -0.412695416 | 0           |
| RP11-65I12.1 | C1QL1    | -0.342545324 | 2.14E-13    |
| RP11-65I12.1 | TMEM215  | -0.072243406 | 0.130705123 |
| RP11-65I12.1 | PNP      | -0.306866194 | 6.32E-11    |
| RP11-65I12.1 | ARNTL    | -0.180087911 | 0.000152078 |
| RP11-65I12.1 | CLDN2    | -0.352672011 | 2.65E-14    |
| RP11-65I12.1 | MVP      | -0.56976387  | 0           |
| RP11-65I12.1 | LGALS1   | -0.531769532 | 0           |
| RP11-65I12.1 | BIRC7    | -0.364607781 | 3.00E-15    |



|              |           |              |             |
|--------------|-----------|--------------|-------------|
| RP11-65I12.1 | COL8A1    | -0.289288744 | 7.86E-10    |
| RP11-65I12.1 | PERP      | -0.395122363 | 0           |
| RP11-65I12.1 | GJA4      | -0.153169493 | 0.001300514 |
| RP11-65I12.1 | IGFL2     | -0.423205453 | 1.67E-20    |
| RP11-65I12.1 | DAPK2     | -0.224992554 | 2.04E-06    |
| RP11-65I12.1 | MAMLD1    | -0.25308127  | 8.49E-08    |
| RP11-65I12.1 | ETV5      | -0.197565791 | 3.17E-05    |
| RP11-65I12.1 | RUNX1     | -0.332916001 | 1.08E-12    |
| RP11-65I12.1 | LONRF2    | -0.057582897 | 0.228470311 |
| RP11-65I12.1 | SPOCK1    | -0.080081244 | 0.093770324 |
| RP11-65I12.1 | XKRX      | -0.206250479 | 1.38E-05    |
| RP11-65I12.1 | TGFB1     | -0.274124368 | 6.06E-09    |
| RP11-65I12.1 | ERP27     | -0.143584281 | 0.002587143 |
| RP11-65I12.1 | TNFRSF10C | -0.191069083 | 5.77E-05    |
| RP11-65I12.1 | PALM      | -0.416561187 | 0           |
| RP11-65I12.1 | TSC22D1   | -0.261906092 | 2.88E-08    |
| RP11-65I12.1 | TGM2      | -0.291688344 | 5.63E-10    |
| RP11-65I12.1 | UBE2QL1   | -0.300872866 | 1.52E-10    |
| RP11-65I12.1 | ECE1      | -0.341481404 | 2.57E-13    |
| RP11-65I12.1 | COL8A2    | -0.328796767 | 2.12E-12    |
| RP11-65I12.1 | HIST3H2A  | -0.397096736 | 0           |
| RP11-65I12.1 | TNFRSF21  | -0.237877039 | 4.98E-07    |
| RP11-65I12.1 | SOX4      | -0.260880043 | 3.27E-08    |
| RP11-65I12.1 | ELF3      | -0.38935484  | 0           |
| RP11-65I12.1 | TPD52L1   | -0.388421551 | 0           |
| RP11-65I12.1 | INHBB     | -0.245431426 | 2.10E-07    |
| RP11-65I12.1 | HPN       | -0.39379959  | 0           |
| RP11-65I12.1 | MMP7      | -0.289003374 | 6.82E-10    |
| RP11-65I12.1 | RAB27A    | -0.283822482 | 1.66E-09    |
| RP11-65I12.1 | IGF2BP2   | -0.210682605 | 8.93E-06    |
| RP11-65I12.1 | ITGB4     | -0.310246598 | 3.82E-11    |
| RP11-65I12.1 | PPP1R1B   | -0.423268523 | 0           |
| RP11-65I12.1 | NPDC1     | -0.427407331 | 0           |
| RP11-65I12.1 | CCL13     | -0.416097314 | 8.26E-20    |
| RP11-65I12.1 | SPINT1    | -0.57578287  | 0           |
| RP11-65I12.1 | HEY2      | -0.273704672 | 6.40E-09    |
| RP11-65I12.1 | CST2      | -0.33574043  | 5.00E-13    |
| RP11-65I12.1 | ADM       | -0.327668878 | 2.54E-12    |
| RP11-65I12.1 | VSTM2L    | -0.385942238 | 0           |
| RP11-65I12.1 | FAM84A    | -0.290464148 | 6.68E-10    |
| RP11-65I12.1 | P4HA2     | -0.414535753 | 0           |
| RP11-65I12.1 | LPL       | -0.143466698 | 0.002608424 |
| RP11-65I12.1 | TMEM173   | -0.369403178 | 1.24E-15    |
| RP11-65I12.1 | DHRS3     | -0.462169342 | 0           |
| RP11-65I12.1 | SCN1B     | -0.570844385 | 0           |
| RP11-65I12.1 | GLT1D1    | -0.197064397 | 3.33E-05    |
| RP11-65I12.1 | PHYHIP    | -0.479165827 | 0           |
| RP11-65I12.1 | BHLHE40   | -0.300847051 | 1.53E-10    |
| RP11-65I12.1 | BID       | -0.520373202 | 0           |
| RP11-65I12.1 | POSTN     | -0.197076879 | 3.32E-05    |
| RP11-65I12.1 | ITGA3     | -0.422957049 | 0           |

|              |            |              |             |
|--------------|------------|--------------|-------------|
| RP11-65I12.1 | RSP04      | -0.300545364 | 1.60E-10    |
| RP11-65I12.1 | ADAMTS9    | -0.092281223 | 0.053369717 |
| RP11-65I12.1 | ABTB2      | -0.296498325 | 2.85E-10    |
| RP11-65I12.1 | KCNQ3      | -0.240956465 | 3.51E-07    |
| RP11-65I12.1 | ANXA1      | -0.34547341  | 1.29E-13    |
| RP11-65I12.1 | S100A11    | -0.59201386  | 0           |
| RP11-65I12.1 | CEACAM6    | -0.320757243 | 5.81E-12    |
| RP11-65I12.1 | IER5L      | -0.461467248 | 0           |
| RP11-65I12.1 | KRT80      | -0.317106976 | 1.34E-11    |
| RP11-65I12.1 | CDH6       | -0.30759396  | 5.67E-11    |
| RP11-65I12.1 | UNC5B      | -0.260330849 | 3.51E-08    |
| RP11-65I12.1 | PLEKHN1    | -0.35127469  | 4.57E-14    |
| RP11-65I12.1 | SYTL1      | -0.417181299 | 0           |
| RP11-65I12.1 | TMEM163    | -0.279200719 | 3.10E-09    |
| RP11-65I12.1 | C4orf48    | -0.381684997 | 2.30E-17    |
| RP11-65I12.1 | B3GNT7     | -0.292460222 | 5.05E-10    |
| RP11-65I12.1 | BAIAP3     | -0.376484396 | 2.04E-16    |
| RP11-65I12.1 | PHLDA2     | -0.525139639 | 0           |
| RP11-65I12.1 | GAP43      | -0.376543868 | 3.09E-16    |
| RP11-65I12.1 | S100A1     | -0.473957001 | 0           |
| RP11-65I12.1 | PTPRE      | -0.270957145 | 9.15E-09    |
| RP11-65I12.1 | CCND1      | -0.231033822 | 1.06E-06    |
| RP11-65I12.1 | ST6GALNAC5 | -0.315850665 | 1.26E-11    |
| RP11-65I12.1 | KRT17      | -0.265596411 | 1.81E-08    |
| RP11-65I12.1 | HPCAL4     | -0.308984815 | 4.61E-11    |
| RP11-65I12.1 | GABBR2     | -0.253513306 | 8.06E-08    |
| RP11-65I12.1 | DIRAS3     | -0.308985808 | 4.61E-11    |
| RP11-65I12.1 | SERINC2    | -0.49254575  | 0           |
| RP11-65I12.1 | PTCHD4     | -0.152033803 | 0.001413857 |
| RP11-65I12.1 | EPS8       | -0.14662612  | 0.00208875  |
| RP11-65I12.1 | LY6E       | -0.549052528 | 0           |
| RP11-65I12.1 | UPP1       | -0.457131571 | 0           |
| RP11-65I12.1 | AHNAK2     | -0.302729656 | 1.16E-10    |
| RP11-65I12.1 | PLXNC1     | -0.304529852 | 8.92E-11    |
| RP11-65I12.1 | TNC        | -0.300630041 | 1.58E-10    |
| RP11-65I12.1 | DUSP4      | -0.341657849 | 2.49E-13    |
| RP11-65I12.1 | NRCAM      | -0.151492127 | 0.001471055 |
| RP11-65I12.1 | NRP2       | -0.284048145 | 1.61E-09    |
| RP11-65I12.1 | CTSC       | -0.423797859 | 0           |
| RP11-65I12.1 | AMIGO2     | -0.237814347 | 5.01E-07    |
| RP11-65I12.1 | NAB2       | -0.386495119 | 0           |
| RP11-65I12.1 | TBC1D2     | -0.368634137 | 1.48E-15    |
| RP11-65I12.1 | PHLDA3     | -0.524679093 | 0           |
| RP11-65I12.1 | PTP4A3     | -0.417323136 | 0           |
| RP11-65I12.1 | CRABP2     | -0.44382895  | 0           |
| RP11-65I12.1 | GOS2       | -0.432301279 | 0           |
| RP11-65I12.1 | S100A6     | -0.597626497 | 0           |
| RP11-65I12.1 | FOXQ1      | -0.230365344 | 1.14E-06    |
| RP11-65I12.1 | LRG1       | -0.374841355 | 3.26E-16    |
| RP11-65I12.1 | LAMP5      | -0.33727182  | 5.25E-13    |
| RP11-65I12.1 | ALDH3B1    | -0.416873229 | 0           |

|              |         |              |             |
|--------------|---------|--------------|-------------|
| RP11-65I12.1 | CDH2    | -0.04473302  | 0.349619423 |
| RP11-65I12.1 | SCG5    | -0.295965868 | 3.08E-10    |
| RP11-65I12.1 | ZCCHC16 | -0.226325606 | 1.66E-06    |
| RP11-65I12.1 | GRB7    | -0.408059328 | 0           |
| RP11-65I12.1 | TIAM1   | -0.123382986 | 0.009699484 |
| RP11-65I12.1 | FXYD5   | -0.501467589 | 0           |
| RP11-65I12.1 | CLDN9   | -0.440762289 | 0           |
| RP11-65I12.1 | FAM43A  | -0.420796728 | 0           |
| RP11-65I12.1 | CHST2   | -0.322591676 | 5.71E-12    |
| RP11-65I12.1 | HMGA2   | -0.339222222 | 3.78E-13    |
| RP11-65I12.1 | GALNT7  | -0.241835571 | 3.18E-07    |
| RP11-65I12.1 | CBLN1   | -0.306525785 | 6.65E-11    |
| RP11-65I12.1 | STRA6   | -0.375344593 | 2.84E-16    |
| RP11-65I12.1 | MUC21   | -0.390766006 | 1.82E-17    |
| RP11-65I12.1 | PRR36   | -0.362487483 | 5.40E-15    |
| RP11-65I12.1 | NFE2L3  | -0.297326228 | 2.54E-10    |
| RP11-65I12.1 | NR1D1   | -0.323961965 | 4.60E-12    |
| RP11-65I12.1 | MUC1    | -0.405577603 | 0           |
| RP11-65I12.1 | NAT8L   | -0.219639053 | 3.59E-06    |
| RP11-65I12.1 | APOC1   | -0.283317826 | 1.78E-09    |
| RP11-65I12.1 | EVA1A   | -0.389058826 | 0           |
| RP11-65I12.1 | ENTPD1  | -0.089420085 | 0.061229717 |
| RP11-65I12.1 | COL1A1  | -0.286295838 | 1.19E-09    |
| RP11-65I12.1 | FNDC4   | -0.369750253 | 1.15E-15    |
| RP11-65I12.1 | FRMD3   | -0.096568392 | 0.043178128 |
| RP11-65I12.1 | SHROOM4 | -0.153597841 | 0.001259982 |
| RP11-65I12.1 | NELL2   | -0.202840289 | 1.92E-05    |
| RP11-65I12.1 | EPHB3   | -0.406170766 | 0           |
| RP11-65I12.1 | TMC6    | -0.452065007 | 0           |
| RP11-65I12.1 | NOD1    | -0.255056068 | 6.69E-08    |
| RP11-65I12.1 | GGCT    | -0.537972495 | 0           |
| RP11-65I12.1 | ICAM1   | -0.291286803 | 5.95E-10    |
| RP11-65I12.1 | PRSS23  | -0.298428586 | 2.16E-10    |
| RP11-65I12.1 | CFI     | -0.260463325 | 3.45E-08    |
| RP11-65I12.1 | CD55    | -0.334434084 | 8.42E-13    |
| RP11-65I12.1 | RASD2   | -0.280259817 | 2.69E-09    |
| RP11-65I12.1 | KLK11   | -0.29287827  | 3.93E-10    |
| RP11-65I12.1 | ICAM5   | -0.227296272 | 1.60E-06    |
| RP11-65I12.1 | ADORA1  | -0.471701223 | 0           |
| RP11-65I12.1 | ITGA2   | -0.225111697 | 2.02E-06    |
| RP11-65I12.1 | ABCC3   | -0.140654919 | 0.003167329 |
| RP11-65I12.1 | MFGE8   | -0.414186834 | 0           |
| RP11-65I12.1 | STK32A  | -0.110701328 | 0.020383926 |
| RP11-65I12.1 | CYSLTR2 | -0.123401708 | 0.00968838  |
| RP11-65I12.1 | LAD1    | -0.50730674  | 0           |
| RP11-65I12.1 | MGAT3   | -0.222284032 | 2.72E-06    |
| RP11-65I12.1 | IGFBP6  | -0.474201102 | 0           |
| RP11-65I12.1 | CYP2S1  | -0.400028226 | 0           |
| RP11-65I12.1 | KCNJ2   | -0.31330716  | 2.40E-11    |
| RP11-65I12.1 | FAM20A  | -0.314679008 | 1.95E-11    |
| RP11-65I12.1 | TGFA    | -0.301233841 | 1.44E-10    |

|              |           |              |             |
|--------------|-----------|--------------|-------------|
| RP11-65I12.1 | MXRA8     | -0.466275102 | 0           |
| RP11-65I12.1 | C8orf4    | -0.247439131 | 1.66E-07    |
| RP11-65I12.1 | CLDN10    | -0.415861252 | 8.70E-20    |
| RP11-65I12.1 | PDE5A     | -0.244005679 | 2.47E-07    |
| RP11-65I12.1 | APOE      | -0.265395853 | 1.86E-08    |
| RP11-65I12.1 | SPOCK2    | -0.299589949 | 1.83E-10    |
| RP11-65I12.1 | TENM1     | -0.055113654 | 0.249072562 |
| RP11-65I12.1 | SLIT1     | -0.209016445 | 1.05E-05    |
| RP11-65I12.1 | CXCL14    | -0.182908484 | 0.000119209 |
| RP11-65I12.1 | ECM1      | -0.215094875 | 5.73E-06    |
| RP11-65I12.1 | DUSP5     | -0.411085139 | 0           |
| RP11-65I12.1 | SEZ6L2    | -0.386034432 | 0           |
| RP11-65I12.1 | THRSP     | -0.237952638 | 4.94E-07    |
| RP11-65I12.1 | C19orf33  | -0.470361429 | 0           |
| RP11-65I12.1 | MPZL2     | -0.296636332 | 2.80E-10    |
| RP11-65I12.1 | CTSH      | -0.554798776 | 0           |
| RP11-65I12.1 | CYP1B1    | -0.352707245 | 3.52E-14    |
| RP11-65I12.1 | ALOX5     | -0.316880463 | 1.39E-11    |
| RP11-65I12.1 | SYTL5     | -0.264226557 | 1.90E-08    |
| RP11-65I12.1 | TNFRSF12A | -0.427744761 | 0           |
| RP11-65I12.1 | DUSP6     | -0.260817776 | 3.30E-08    |
| RP11-65I12.1 | ALOX15B   | -0.409330898 | 0           |
| RP11-65I12.1 | SDC4      | -0.41528749  | 0           |
| RP11-65I12.1 | MDK       | -0.398783747 | 0           |
| RP11-65I12.1 | KRT19     | -0.495282213 | 0           |
| RP11-65I12.1 | MET       | -0.325363032 | 3.68E-12    |
| RP11-65I12.1 | TESC      | -0.323678574 | 4.81E-12    |
| RP11-65I12.1 | CXCL17    | -0.481081993 | 8.25E-27    |
| RP11-65I12.1 | NPC2      | -0.566774085 | 0           |
| RP11-65I12.1 | COMP      | -0.353959384 | 2.79E-14    |
| RP11-65I12.1 | TUSC3     | -0.28645966  | 1.16E-09    |
| RP11-65I12.1 | TMPRSS4   | -0.361302575 | 6.85E-15    |
| RP11-65I12.1 | LGALS3    | -0.520175055 | 0           |
| RP11-65I12.1 | CRLF1     | -0.255903687 | 6.03E-08    |
| RP11-65I12.1 | CTXN1     | -0.457113983 | 0           |
| RP11-65I12.1 | PCSK1N    | -0.235092634 | 6.80E-07    |
| RP11-65I12.1 | NMU       | -0.371095631 | 8.83E-16    |
| RP11-65I12.1 | GALE      | -0.548456954 | 0           |
| RP11-65I12.1 | PCSK2     | -0.104590417 | 0.028478739 |
| RP11-65I12.1 | GJB3      | -0.421381664 | 0           |
| RP11-65I12.1 | SLPI      | -0.385585518 | 0           |
| RP11-65I12.1 | AGR2      | -0.170934168 | 0.000327057 |
| RP11-65I12.1 | MRC2      | -0.334614785 | 8.18E-13    |
| RP11-65I12.1 | GOLT1A    | -0.525497777 | 0           |
| RP11-65I12.1 | SLC27A6   | -0.217030888 | 4.45E-06    |
| RP11-65I12.1 | KCNN4     | -0.516687848 | 0           |
| RP11-65I12.1 | ETV4      | -0.296098993 | 2.47E-10    |
| RP11-65I12.1 | SYT12     | -0.485445099 | 0           |
| RP11-65I12.1 | PVRL4     | -0.498414261 | 0           |
| RP11-65I12.1 | PLCD3     | -0.412263806 | 0           |
| RP11-65I12.1 | PLAU      | -0.430382365 | 0           |

|              |          |              |             |
|--------------|----------|--------------|-------------|
| RP11-65I12.1 | LRRK2    | -0.10228684  | 0.03217867  |
| RP11-65I12.1 | SFN      | -0.469386015 | 0           |
| RP11-65I12.1 | LPAR5    | -0.28903755  | 8.14E-10    |
| RP11-65I12.1 | NGEF     | -0.396239047 | 0           |
| RP11-65I12.1 | DTX4     | -0.280906453 | 2.47E-09    |
| RP11-65I12.1 | CST6     | -0.435031644 | 0           |
| RP11-65I12.1 | QPCT     | -0.35753141  | 1.43E-14    |
| RP11-65I12.1 | TIMP1    | -0.5511442   | 0           |
| RP11-65I12.1 | CAMK2N1  | -0.427257551 | 0           |
| RP11-65I12.1 | KLHDC8A  | -0.153528482 | 0.001266465 |
| RP11-65I12.1 | PDLIM4   | -0.529195755 | 0           |
| RP11-65I12.1 | SCEL     | -0.260410987 | 3.47E-08    |
| RP11-65I12.1 | LCN2     | -0.468608748 | 0           |
| RP11-65I12.1 | PROS1    | -0.354112142 | 2.71E-14    |
| RP11-65I12.1 | GABRB2   | -0.276034915 | 4.72E-09    |
| RP11-65I12.1 | TMPRSS6  | -0.399930358 | 0           |
| RP11-65I12.1 | KLK7     | -0.3385069   | 3.13E-13    |
| RP11-65I12.1 | PDZK1IP1 | -0.469827554 | 0           |
| RP11-65I12.1 | CDH3     | -0.359651166 | 9.48E-15    |
| RP11-65I12.1 | LRP4     | -0.170630211 | 0.000335265 |
| RP11-65I12.1 | IGSF1    | -0.103178854 | 0.030699869 |
| RP11-65I12.1 | B3GNT3   | -0.380586043 | 4.42E-17    |
| RP11-65I12.1 | CLDN1    | -0.284481741 | 1.52E-09    |
| RP11-65I12.1 | GDF15    | -0.43795902  | 0           |
| RP11-65I12.1 | ARHGAP36 | -0.136515132 | 0.004162442 |
| RP11-65I12.1 | LAMB3    | -0.368221674 | 1.62E-15    |
| RP11-65I12.1 | KLK10    | -0.411481432 | 0           |
| RP11-65I12.1 | DPP4     | -0.29236278  | 5.12E-10    |
| RP11-65I12.1 | METTL7B  | -0.452246133 | 0           |
| RP11-65I12.1 | LIPH     | -0.393818312 | 0           |
| RP11-65I12.1 | CLDN16   | -0.253804356 | 7.78E-08    |
| RP11-65I12.1 | CHI3L1   | -0.458005288 | 0           |
| RP11-65I12.1 | SLC22A31 | -0.419698844 | 3.69E-20    |
| RP11-65I12.1 | TACSTD2  | -0.439561071 | 0           |
| RP11-65I12.1 | SFTPB    | -0.408282012 | 0           |
| RP11-65I12.1 | RXRG     | -0.373820837 | 4.28E-16    |
| RP11-65I12.1 | DCSTAMP  | -0.393944043 | 9.49E-18    |
| RP11-65I12.1 | CITED1   | -0.477441655 | 0           |
| RP11-65I12.1 | SERPINA1 | -0.520078464 | 0           |
| RP11-65I12.1 | PRR15    | -0.336271726 | 6.20E-13    |
| RP11-65I12.1 | SLC34A2  | -0.366773659 | 2.22E-15    |
| RP11-65I12.1 | FN1      | -0.378232965 | 1.16E-16    |
| RP11-65I12.1 | ZCCHC12  | -0.218424218 | 4.07E-06    |
| INAFM2       | TFF3     | 0.671586193  | 0           |
| INAFM2       | CCL21    | 0.372309056  | 7.00E-16    |
| INAFM2       | TPO      | 0.694732169  | 0           |
| INAFM2       | MT1G     | 0.674432013  | 0           |
| INAFM2       | DIO1     | 0.60096279   | 0           |
| INAFM2       | DPT      | 0.30330165   | 8.57E-11    |
| INAFM2       | CDH16    | 0.552264146  | 0           |
| INAFM2       | CRABP1   | 0.623647954  | 1.11E-48    |

|        |           |             |             |
|--------|-----------|-------------|-------------|
| INAFM2 | SLC26A7   | 0.680509734 | 0           |
| INAFM2 | MT1H      | 0.62545957  | 4.91E-49    |
| INAFM2 | SLC26A4   | 0.691460837 | 0           |
| INAFM2 | SLC5A8    | 0.61254661  | 1.45E-46    |
| INAFM2 | PKHD1L1   | 0.536822741 | 3.91E-34    |
| INAFM2 | TFCP2L1   | 0.583395553 | 0           |
| INAFM2 | WSCD2     | 0.667320252 | 6.76E-58    |
| INAFM2 | IPCEF1    | 0.554265326 | 0           |
| INAFM2 | SLC5A5    | 0.531290113 | 2.41E-33    |
| INAFM2 | MT1F      | 0.687577337 | 0           |
| INAFM2 | FOSB      | 0.46886448  | 0           |
| INAFM2 | SEMA3D    | 0.590992228 | 1.09E-42    |
| INAFM2 | BMP8A     | 0.586508878 | 0           |
| INAFM2 | MATN2     | 0.608394631 | 0           |
| INAFM2 | PLA2R1    | 0.458347824 | 0           |
| INAFM2 | COL23A1   | 0.666295242 | 0           |
| INAFM2 | HGD       | 0.732586797 | 0           |
| INAFM2 | TCEAL2    | 0.533725608 | 0           |
| INAFM2 | CHRD1     | 0.296288346 | 2.40E-10    |
| INAFM2 | TNFRSF11B | 0.461982543 | 0           |
| INAFM2 | FAM167A   | 0.689090881 | 0           |
| INAFM2 | KIT       | 0.513667993 | 0           |
| INAFM2 | SLC4A4    | 0.656734285 | 0           |
| INAFM2 | SMOC2     | 0.433234    | 0           |
| INAFM2 | FHL1      | 0.708955029 | 0           |
| INAFM2 | OTOS      | 0.663359923 | 0           |
| INAFM2 | IGFBPL1   | 0.547360205 | 1.12E-35    |
| INAFM2 | HBB       | 0.435357727 | 0           |
| INAFM2 | BEX1      | 0.579824235 | 0           |
| INAFM2 | FABP4     | 0.599663931 | 3.25E-44    |
| INAFM2 | LMOD1     | 0.656989308 | 0           |
| INAFM2 | SOD3      | 0.628812937 | 0           |
| INAFM2 | TMEM171   | 0.51104585  | 0           |
| INAFM2 | PI16      | 0.368953838 | 1.38E-15    |
| INAFM2 | ZMAT4     | 0.679881698 | 7.61E-61    |
| INAFM2 | MFAP4     | 0.284650811 | 1.49E-09    |
| INAFM2 | CWH43     | 0.525317805 | 1.65E-32    |
| INAFM2 | SPX       | 0.737974339 | 0           |
| INAFM2 | APOD      | 0.15906084  | 0.000835519 |
| INAFM2 | DPP6      | 0.583218823 | 0           |
| INAFM2 | MMRN1     | 0.418448614 | 0           |
| INAFM2 | WDR72     | 0.469348003 | 0           |
| INAFM2 | MPPED2    | 0.721261953 | 0           |
| INAFM2 | PAPSS2    | 0.448004635 | 0           |
| INAFM2 | DCN       | 0.095042792 | 0.046598875 |
| INAFM2 | SORBS2    | 0.651595951 | 0           |
| INAFM2 | EGR2      | 0.403232752 | 0           |
| INAFM2 | EDN3      | 0.709319506 | 2.28E-68    |
| INAFM2 | DIO2      | 0.586922616 | 0           |
| INAFM2 | ITPR1     | 0.679690767 | 0           |
| INAFM2 | CFD       | 0.330240102 | 1.68E-12    |

|        |            |             |            |
|--------|------------|-------------|------------|
| INAFM2 | CPXM1      | 0.442652411 | 0          |
| INAFM2 | ELMO1      | 0.716388004 | 0          |
| INAFM2 | GPC3       | 0.466151082 | 4.58E-25   |
| INAFM2 | MYOC       | 0.314341769 | 1.59E-11   |
| INAFM2 | DEPTOR     | 0.57569025  | 0          |
| INAFM2 | DGKI       | 0.49358031  | 0          |
| INAFM2 | CARTPT     | 0.638001139 | 1.51E-51   |
| INAFM2 | IYD        | 0.463080078 | 0          |
| INAFM2 | LYVE1      | 0.406134314 | 0          |
| INAFM2 | CLCNKB     | 0.665990009 | 0          |
| INAFM2 | NCAM1      | 0.404208024 | 0          |
| INAFM2 | HBA2       | 0.454479926 | 0          |
| INAFM2 | GLT8D2     | 0.542164491 | 0          |
| INAFM2 | OGDHL      | 0.49619919  | 0          |
| INAFM2 | LIFR       | 0.53625428  | 0          |
| INAFM2 | CSGALNACT1 | 0.359622231 | 9.53E-15   |
| INAFM2 | RAP1GAP    | 0.512503936 | 0          |
| INAFM2 | COL9A3     | 0.663948122 | 0          |
| INAFM2 | FBLN1      | 0.128793789 | 0.00692366 |
| INAFM2 | EFEMP1     | 0.417727088 | 0          |
| INAFM2 | AOX1       | 0.486622365 | 1.77E-27   |
| INAFM2 | GRIN2C     | 0.632008385 | 0          |
| INAFM2 | C11orf74   | 0.710927984 | 0          |
| INAFM2 | PPARGC1A   | 0.584991504 | 0          |
| INAFM2 | ANGPTL1    | 0.550792302 | 0          |
| INAFM2 | SCARA5     | 0.267349346 | 1.27E-08   |
| INAFM2 | LTF        | 0.532635164 | 0          |
| INAFM2 | CA4        | 0.715429864 | 4.75E-70   |
| INAFM2 | TG         | 0.661689791 | 0          |
| INAFM2 | FCGBP      | 0.709624217 | 0          |
| INAFM2 | PBX4       | 0.701193276 | 0          |
| INAFM2 | CYR61      | 0.495727156 | 0          |
| INAFM2 | FOS        | 0.498174414 | 0          |
| INAFM2 | KHDRBS2    | 0.644984923 | 0          |
| INAFM2 | MUM1L1     | 0.444268929 | 0          |
| INAFM2 | RGS16      | 0.616618915 | 0          |
| INAFM2 | MT1M       | 0.590786969 | 0          |
| INAFM2 | LRP2       | 0.574799371 | 0          |
| INAFM2 | MAFB       | 0.502008272 | 0          |
| INAFM2 | KCNK2      | 0.452162023 | 0          |
| INAFM2 | TBC1D4     | 0.589983604 | 0          |
| INAFM2 | MIOX       | 0.720301671 | 2.02E-71   |
| INAFM2 | TPPP       | 0.561440583 | 0          |
| INAFM2 | FMOD       | 0.480309744 | 0          |
| INAFM2 | CITED2     | 0.414550929 | 0          |
| INAFM2 | RGS8       | 0.620430437 | 4.64E-48   |
| INAFM2 | ABI3BP     | 0.335856001 | 6.65E-13   |
| INAFM2 | ADH1B      | 0.376588118 | 3.07E-16   |
| INAFM2 | OGN        | 0.211411454 | 7.91E-06   |
| INAFM2 | NR4A1      | 0.424109901 | 0          |
| INAFM2 | FOXJ1      | 0.716079546 | 3.13E-70   |

|        |          |             |             |
|--------|----------|-------------|-------------|
| INAFM2 | ALDH1A1  | 0.628328563 | 0           |
| INAFM2 | OCA2     | 0.466407477 | 4.28E-25    |
| INAFM2 | TMEM139  | 0.322393814 | 5.89E-12    |
| INAFM2 | ARHGAP24 | 0.66463972  | 0           |
| INAFM2 | SLC25A15 | 0.488433182 | 0           |
| INAFM2 | DES      | 0.291037322 | 5.11E-10    |
| INAFM2 | GDF10    | 0.445189853 | 9.29E-23    |
| INAFM2 | KIAA1324 | 0.601870832 | 0           |
| INAFM2 | JUN      | 0.5080016   | 0           |
| INAFM2 | C7       | 0.06267329  | 0.189883548 |
| INAFM2 | LGI3     | 0.788583529 | 0           |
| INAFM2 | CDON     | 0.713854793 | 0           |
| INAFM2 | BCL2     | 0.550386364 | 0           |
| INAFM2 | HLF      | 0.766506012 | 0           |
| INAFM2 | EGR1     | 0.50203437  | 0           |
| INAFM2 | IP6K3    | 0.531710811 | 0           |
| INAFM2 | SCUBE3   | 0.512425358 | 0           |
| INAFM2 | PKNOX2   | 0.614769926 | 0           |
| INAFM2 | SMAD9    | 0.374303792 | 3.77E-16    |
| INAFM2 | IQGAP2   | 0.575995626 | 0           |
| INAFM2 | GNA14    | 0.729586091 | 0           |
| INAFM2 | LAYN     | 0.558367398 | 0           |
| INAFM2 | AVPR1A   | 0.617984948 | 0           |
| INAFM2 | PDLIM3   | 0.474403929 | 0           |
| INAFM2 | GPM6A    | 0.540231109 | 0           |
| INAFM2 | SDPR     | 0.611583413 | 0           |
| INAFM2 | CRYAB    | 0.22577436  | 1.88E-06    |
| INAFM2 | FOXA2    | 0.583104951 | 2.41E-41    |
| INAFM2 | C8orf88  | 0.524237271 | 0           |
| INAFM2 | ISM1     | 0.53547914  | 0           |
| INAFM2 | BMP2     | 0.355297475 | 2.18E-14    |
| INAFM2 | ID4      | 0.573928633 | 0           |
| INAFM2 | NUPR1    | 0.376675735 | 1.93E-16    |
| INAFM2 | SERTM1   | 0.452513942 | 1.51E-23    |
| INAFM2 | IRS1     | 0.629560986 | 0           |
| INAFM2 | FIBIN    | 0.200934565 | 2.31E-05    |
| INAFM2 | PODN     | 0.161410939 | 0.000697379 |
| INAFM2 | TDRD9    | 0.408512214 | 0           |
| INAFM2 | EPHA3    | 0.35124845  | 4.59E-14    |
| INAFM2 | AIF1L    | 0.423047399 | 0           |
| INAFM2 | EBF4     | 0.735713739 | 0           |
| INAFM2 | ADM2     | 0.560223904 | 0           |
| INAFM2 | GSTM3    | 0.707497653 | 0           |
| INAFM2 | HSD17B6  | 0.428261899 | 0           |
| INAFM2 | AGR3     | 0.398914761 | 3.38E-18    |
| INAFM2 | EPHB1    | 0.398820908 | 0           |
| INAFM2 | TMOD1    | 0.408116488 | 0           |
| INAFM2 | WASF3    | 0.626178028 | 0           |
| INAFM2 | SELV     | 0.671371613 | 7.85E-59    |
| INAFM2 | ENPP1    | 0.350852441 | 4.93E-14    |
| INAFM2 | SYNE1    | 0.620483219 | 4.53E-48    |



|        |          |              |             |
|--------|----------|--------------|-------------|
| INAFM2 | PLCH1    | 0.541418712  | 0           |
| INAFM2 | CCDC146  | 0.625109002  | 0           |
| INAFM2 | SLC16A2  | 0.641717137  | 0           |
| INAFM2 | IER2     | 0.687049135  | 0           |
| INAFM2 | KCNAB1   | 0.702616753  | 0           |
| INAFM2 | SYNDIG1  | 0.498590564  | 0           |
| INAFM2 | C16orf89 | 0.809588757  | 0           |
| INAFM2 | CTGF     | 0.356484652  | 1.74E-14    |
| INAFM2 | NR4A3    | 0.257314115  | 5.08E-08    |
| INAFM2 | KIAA1456 | 0.577351021  | 0           |
| INAFM2 | AQP4     | 0.588126246  | 0           |
| INAFM2 | RNF150   | 0.573862963  | 0           |
| INAFM2 | C1S      | -0.000543094 | 0.990944327 |
| INAFM2 | PFKFB2   | 0.500334452  | 0           |
| INAFM2 | PROX1    | 0.519268432  | 0           |
| INAFM2 | TCF7L1   | 0.706803644  | 0           |
| INAFM2 | HSPB6    | 0.416863158  | 0           |
| INAFM2 | FHDC1    | 0.460978903  | 0           |
| INAFM2 | PRR15L   | 0.544230633  | 0           |
| INAFM2 | SLC1A1   | 0.388477861  | 0           |
| INAFM2 | BTBD11   | 0.728664291  | 0           |
| INAFM2 | TRIM58   | 0.43869629   | 0           |
| INAFM2 | LRIG1    | 0.463788697  | 0           |
| INAFM2 | ROR2     | 0.259763217  | 3.76E-08    |
| INAFM2 | GPR125   | 0.551603469  | 0           |
| INAFM2 | FLRT1    | 0.700822939  | 0           |
| INAFM2 | PGF      | 0.720732192  | 0           |
| INAFM2 | DUSP1    | 0.435728773  | 0           |
| INAFM2 | PLA2G7   | 0.313046037  | 2.50E-11    |
| INAFM2 | PLSCR4   | 0.391330347  | 0           |
| INAFM2 | FAM46B   | 0.469768692  | 0           |
| INAFM2 | GLDC     | 0.483755252  | 0           |
| INAFM2 | ZBTB16   | 0.442176122  | 0           |
| INAFM2 | OMD      | 0.110419505  | 0.020666109 |
| INAFM2 | HSD11B2  | 0.671656686  | 0           |
| INAFM2 | FGL2     | 0.144933294  | 0.002354063 |
| INAFM2 | CLCNKA   | 0.719472562  | 3.47E-71    |
| INAFM2 | GATM     | 0.538611897  | 0           |
| INAFM2 | TNS3     | 0.292020243  | 5.37E-10    |
| INAFM2 | TOB1     | 0.392108466  | 0           |
| INAFM2 | MARC2    | 0.664704965  | 0           |
| INAFM2 | LRRC2    | 0.51932148   | 0           |
| INAFM2 | SORD     | 0.235403966  | 6.57E-07    |
| INAFM2 | RIMS4    | 0.530689158  | 0           |
| INAFM2 | SLC29A4  | 0.659982497  | 0           |
| INAFM2 | SLC39A14 | 0.562328058  | 0           |
| INAFM2 | FAXDC2   | 0.598193279  | 0           |
| INAFM2 | HSPB8    | 0.274085931  | 6.09E-09    |
| INAFM2 | CCL19    | -0.044493752 | 0.352345023 |
| INAFM2 | KCNIP3   | 0.731886264  | 0           |
| INAFM2 | CGNL1    | 0.614121305  | 0           |

|        |          |             |             |
|--------|----------|-------------|-------------|
| INAFM2 | ATF3     | 0.188419849 | 7.33E-05    |
| INAFM2 | SGCD     | 0.276872179 | 4.22E-09    |
| INAFM2 | STARD13  | 0.508587529 | 0           |
| INAFM2 | LDHD     | 0.679688355 | 0           |
| INAFM2 | RCAN1    | 0.390064593 | 0           |
| INAFM2 | ID3      | 0.451409294 | 0           |
| INAFM2 | SYTL3    | 0.650351189 | 0           |
| INAFM2 | MT1E     | 0.570599716 | 0           |
| INAFM2 | CAMK1D   | 0.587843991 | 0           |
| INAFM2 | PRKCQ    | 0.601952104 | 0           |
| INAFM2 | NUAK2    | 0.302240743 | 1.25E-10    |
| INAFM2 | LIPG     | 0.619198507 | 0           |
| INAFM2 | SLC25A25 | 0.307568571 | 5.69E-11    |
| INAFM2 | PRKX     | 0.151716087 | 0.001447153 |
| INAFM2 | SRPX     | 0.26544961  | 1.85E-08    |
| INAFM2 | FAM189A1 | 0.622023193 | 0           |
| INAFM2 | PLEKHH1  | 0.534432098 | 0           |
| INAFM2 | WNT11    | 0.504322628 | 0           |
| INAFM2 | SNAI1    | 0.37724975  | 1.61E-16    |
| INAFM2 | FDCSP    | 0.019982655 | 0.676289982 |
| INAFM2 | MT1X     | 0.544822094 | 0           |
| INAFM2 | ACACB    | 0.650041275 | 0           |
| INAFM2 | ARC      | 0.290937175 | 6.25E-10    |
| INAFM2 | KLK4     | 0.123610322 | 0.009528421 |
| INAFM2 | ZFPM2    | 0.309749743 | 4.11E-11    |
| INAFM2 | AKAP12   | 0.288423963 | 8.86E-10    |
| INAFM2 | GJB6     | 0.330385248 | 1.22E-12    |
| INAFM2 | ERO1LB   | 0.613865572 | 0           |
| INAFM2 | DNALI1   | 0.651963451 | 0           |
| INAFM2 | HKDC1    | 0.352369815 | 3.74E-14    |
| INAFM2 | ZFP36L2  | 0.39959775  | 0           |
| INAFM2 | CAPSL    | 0.712421987 | 3.23E-69    |
| INAFM2 | CYP7B1   | 0.423496597 | 0           |
| INAFM2 | CPQ      | 0.562090764 | 0           |
| INAFM2 | RPS6KA6  | 0.583667333 | 1.94E-41    |
| INAFM2 | TLE1     | 0.480316127 | 0           |
| INAFM2 | TP53INP2 | 0.644607636 | 0           |
| INAFM2 | KATNAL2  | 0.698720771 | 0           |
| INAFM2 | SGPP2    | 0.061277187 | 0.199955114 |
| INAFM2 | CTH      | 0.448348165 | 0           |
| INAFM2 | KIF12    | 0.415191182 | 0           |
| INAFM2 | TMEM220  | 0.668064235 | 0           |
| INAFM2 | CENPJ    | 0.499493358 | 0           |
| INAFM2 | FAM155B  | 0.646177064 | 0           |
| INAFM2 | WFS1     | 0.57496447  | 0           |
| INAFM2 | SELENBP1 | 0.688247517 | 0           |
| INAFM2 | SNTA1    | 0.629135616 | 0           |
| INAFM2 | FRAS1    | 0.067837863 | 0.15586048  |
| INAFM2 | FBLN7    | 0.562022683 | 0           |
| INAFM2 | AGPAT9   | 0.542402069 | 0           |
| INAFM2 | GPR83    | 0.514273922 | 0           |

|        |          |              |             |
|--------|----------|--------------|-------------|
| INAFM2 | PRTG     | 0.505159893  | 0           |
| INAFM2 | EGR3     | 0.26919184   | 1.15E-08    |
| INAFM2 | GRAMD2   | 0.361447533  | 6.66E-15    |
| INAFM2 | HYOU1    | 0.514458168  | 0           |
| INAFM2 | FBLN5    | 0.348493406  | 7.54E-14    |
| INAFM2 | ITM2A    | 0.559401249  | 0           |
| INAFM2 | SRF      | 0.546311242  | 0           |
| INAFM2 | FGFR2    | 0.35669372   | 1.67E-14    |
| INAFM2 | MT1A     | 0.368955127  | 1.33E-15    |
| INAFM2 | MAMDC2   | 0.272959176  | 7.06E-09    |
| INAFM2 | FHL2     | 0.353735139  | 2.91E-14    |
| INAFM2 | FTCDNL1  | 0.465199692  | 0           |
| INAFM2 | PKIA     | 0.355206132  | 2.21E-14    |
| INAFM2 | DNAJB4   | 0.448043215  | 0           |
| INAFM2 | SLC25A33 | 0.673686092  | 0           |
| INAFM2 | EYA2     | 0.287640312  | 9.87E-10    |
| INAFM2 | LPAR1    | 0.183224497  | 0.000115975 |
| INAFM2 | STX11    | 0.30475126   | 8.64E-11    |
| INAFM2 | ARHGEF28 | 0.477611434  | 0           |
| INAFM2 | OR2W3    | 0.542254274  | 0           |
| INAFM2 | ALDH1B1  | 0.401047411  | 2.15E-18    |
| INAFM2 | CXCL12   | 0.189778365  | 6.49E-05    |
| INAFM2 | OLFM2    | 0.543674915  | 0           |
| INAFM2 | TUB      | 0.350126661  | 5.62E-14    |
| INAFM2 | HTRA3    | 0.265991286  | 1.73E-08    |
| INAFM2 | CKB      | 0.609552447  | 0           |
| INAFM2 | RGS2     | 0.110202912  | 0.02095944  |
| INAFM2 | SHANK2   | 0.619033125  | 0           |
| INAFM2 | CNTFR    | 0.644633581  | 6.38E-53    |
| INAFM2 | CYTH3    | 0.499165998  | 0           |
| INAFM2 | PLAC9    | 0.506408769  | 0           |
| INAFM2 | WVOX     | 0.660198941  | 0           |
| INAFM2 | NPR3     | 0.470340721  | 0           |
| INAFM2 | SDC2     | 0.414840561  | 0           |
| INAFM2 | KLF15    | 0.589362499  | 0           |
| INAFM2 | TMEM164  | 0.50699328   | 0           |
| INAFM2 | LONRF3   | 0.233891557  | 7.77E-07    |
| INAFM2 | GBP1     | 0.121379111  | 0.010955437 |
| INAFM2 | ARHGAP6  | 0.373921116  | 4.17E-16    |
| INAFM2 | TMEM119  | 0.120672053  | 0.011431838 |
| INAFM2 | SH3RF1   | 0.387172534  | 0           |
| INAFM2 | CRELD2   | 0.607027037  | 0           |
| INAFM2 | PCP4     | -0.007115402 | 0.881774246 |
| INAFM2 | GCSH     | 0.698600351  | 0           |
| INAFM2 | IMPA2    | 0.548968702  | 0           |
| INAFM2 | C1R      | -0.011440157 | 0.811014436 |
| INAFM2 | SUCNR1   | 0.383790711  | 0           |
| INAFM2 | SFRP1    | 0.447631462  | 0           |
| INAFM2 | UGT8     | 0.469028444  | 0           |
| INAFM2 | TLE4     | 0.232950893  | 8.62E-07    |
| INAFM2 | ANTXR1   | 0.334101192  | 8.90E-13    |

|        |          |             |             |
|--------|----------|-------------|-------------|
| INAFM2 | GPX3     | 0.389489159 | 0           |
| INAFM2 | DPY19L2  | 0.63772272  | 0           |
| INAFM2 | FAM46C   | 0.416079792 | 0           |
| INAFM2 | IL33     | 0.228213328 | 1.35E-06    |
| INAFM2 | PEG3     | 0.556153746 | 0           |
| INAFM2 | FAHD2A   | 0.651396387 | 0           |
| INAFM2 | PTGDS    | 0.105961982 | 0.026454232 |
| INAFM2 | CHCHD10  | 0.526940403 | 0           |
| INAFM2 | CD36     | 0.620887929 | 0           |
| INAFM2 | ANKRD37  | 0.584738608 | 0           |
| INAFM2 | TSPAN33  | 0.5482042   | 0           |
| INAFM2 | PRDM16   | 0.496692074 | 0           |
| INAFM2 | UST      | 0.695959202 | 0           |
| INAFM2 | NEXN     | 0.575877192 | 0           |
| INAFM2 | NUPR1L   | 0.302301202 | 9.94E-11    |
| INAFM2 | SLC24A3  | 0.534573794 | 0           |
| INAFM2 | MARC1    | 0.693305287 | 0           |
| INAFM2 | MYH11    | 0.342663616 | 2.10E-13    |
| INAFM2 | APOA1    | 0.624859462 | 6.44E-49    |
| INAFM2 | TMEM178B | 0.477662638 | 0           |
| INAFM2 | CAPN6    | 0.286330366 | 9.93E-10    |
| INAFM2 | PPM1L    | 0.609431318 | 0           |
| INAFM2 | FZD8     | 0.62415231  | 0           |
| INAFM2 | RCAN2    | 0.649715475 | 0           |
| INAFM2 | COPZ2    | 0.61274591  | 0           |
| INAFM2 | GAS1     | 0.21655906  | 4.93E-06    |
| INAFM2 | DACT1    | 0.356229061 | 1.83E-14    |
| INAFM2 | WBSCR17  | 0.634562163 | 0           |
| INAFM2 | NCS1     | 0.420657018 | 0           |
| INAFM2 | SPIRE2   | 0.468034733 | 0           |
| INAFM2 | C15orf52 | 0.438608067 | 0           |
| INAFM2 | SPAG5    | 0.442877932 | 0           |
| INAFM2 | ARL4D    | 0.557348014 | 0           |
| INAFM2 | FAM189A2 | 0.53531007  | 0           |
| INAFM2 | MAP1LC3A | 0.747073191 | 0           |
| INAFM2 | KLF6     | 0.067059603 | 0.160669528 |
| INAFM2 | ADD3     | 0.296368118 | 2.91E-10    |
| INAFM2 | TSPAN7   | 0.559412879 | 0           |
| INAFM2 | KLF9     | 0.466140498 | 0           |
| INAFM2 | KCNQ1    | 0.707456662 | 0           |
| INAFM2 | MAN1A1   | 0.107791539 | 0.023947587 |
| INAFM2 | MLF1     | 0.338513462 | 4.26E-13    |
| INAFM2 | RARB     | 0.605534343 | 0           |
| INAFM2 | CDC42EP2 | 0.570659287 | 0           |
| INAFM2 | FAM3B    | 0.239808435 | 4.00E-07    |
| INAFM2 | GADD45B  | 0.337005166 | 5.49E-13    |
| INAFM2 | TMEM47   | 0.564872332 | 0           |
| INAFM2 | SDF2L1   | 0.601320929 | 0           |
| INAFM2 | CCDC85A  | 0.191361693 | 5.62E-05    |
| INAFM2 | CRYBG3   | 0.037136223 | 0.437516679 |
| INAFM2 | FBLN2    | 0.014091093 | 0.76835259  |

|        |          |              |             |
|--------|----------|--------------|-------------|
| INAFM2 | PEBP4    | 0.461562705  | 0           |
| INAFM2 | CDADC1   | 0.732215326  | 0           |
| INAFM2 | FAM63A   | 0.525079216  | 0           |
| INAFM2 | GLUL     | 0.335075613  | 7.57E-13    |
| INAFM2 | FREM2    | 0.462987742  | 0           |
| INAFM2 | ACKR3    | 0.486843188  | 0           |
| INAFM2 | DENND6A  | 0.604512265  | 0           |
| INAFM2 | CLDN8    | 0.047179852  | 0.323872578 |
| INAFM2 | UTS2R    | 0.110315113  | 0.020787152 |
| INAFM2 | SCNN1B   | 0.394677987  | 0           |
| INAFM2 | TTC30A   | 0.497966481  | 0           |
| INAFM2 | CORO2B   | 0.632028243  | 0           |
| INAFM2 | TC2N     | 0.181997889  | 0.00012901  |
| INAFM2 | ALDH2    | 0.66711421   | 0           |
| INAFM2 | GPR183   | 0.088421693  | 0.064188144 |
| INAFM2 | C4orf47  | 0.575301333  | 0           |
| INAFM2 | SLC25A42 | 0.77874911   | 0           |
| INAFM2 | LGMN     | 0.543560169  | 0           |
| INAFM2 | ACSF2    | 0.639760636  | 0           |
| INAFM2 | KIAA1467 | 0.558958008  | 0           |
| INAFM2 | PRKG1    | 0.69304374   | 0           |
| INAFM2 | GNAI1    | 0.649985958  | 0           |
| INAFM2 | ABCC4    | 0.248789278  | 1.41E-07    |
| INAFM2 | PRPS1    | 0.560088875  | 0           |
| INAFM2 | TSPAN5   | 0.244278716  | 2.40E-07    |
| INAFM2 | CR2      | 0.210495127  | 8.68E-06    |
| INAFM2 | CCDC170  | 0.401840904  | 0           |
| INAFM2 | RRAD     | 0.102252515  | 0.03223677  |
| INAFM2 | SCGB2A1  | 0.513938193  | 0           |
| INAFM2 | SESN3    | 0.185006964  | 9.92E-05    |
| INAFM2 | SGK223   | 0.159155587  | 0.000829492 |
| INAFM2 | NDRG2    | 0.738690191  | 0           |
| INAFM2 | C3orf52  | 0.313273261  | 2.42E-11    |
| INAFM2 | FLRT3    | -0.259770025 | 3.76E-08    |
| INAFM2 | MST1R    | -0.696295781 | 0           |
| INAFM2 | SDC1     | -0.340534215 | 3.02E-13    |
| INAFM2 | ST8SIA4  | -0.64127191  | 0           |
| INAFM2 | UBTD1    | -0.200143965 | 2.49E-05    |
| INAFM2 | EPHA2    | -0.388503391 | 0           |
| INAFM2 | TMEM130  | -0.20806798  | 1.16E-05    |
| INAFM2 | SPINK2   | -0.322458633 | 5.83E-12    |
| INAFM2 | MMP16    | -0.642776377 | 0           |
| INAFM2 | SIGLEC15 | -0.501337808 | 0           |
| INAFM2 | RIN1     | -0.49136297  | 0           |
| INAFM2 | IL1RN    | -0.587899591 | 0           |
| INAFM2 | FCER1G   | -0.284019069 | 1.62E-09    |
| INAFM2 | CD276    | -0.637390537 | 0           |
| INAFM2 | CTSB     | -0.467037193 | 0           |
| INAFM2 | FAM171A2 | -0.070321857 | 0.141239131 |
| INAFM2 | ASPHD1   | -0.534733928 | 0           |
| INAFM2 | C15orf48 | -0.460543463 | 0           |

|        |          |              |             |
|--------|----------|--------------|-------------|
| INAFM2 | DYSF     | -0.143816185 | 0.002545634 |
| INAFM2 | PDZRN4   | -0.080920069 | 0.090372989 |
| INAFM2 | EFHD2    | -0.083016422 | 0.082313356 |
| INAFM2 | ASF1B    | -0.399044301 | 0           |
| INAFM2 | AQP1     | -0.001371849 | 0.97712633  |
| INAFM2 | ARRDC2   | -0.388677851 | 0           |
| INAFM2 | PRSS1    | -0.384707487 | 6.19E-17    |
| INAFM2 | MAPK13   | -0.478978886 | 0           |
| INAFM2 | CST5     | -0.643844011 | 9.34E-53    |
| INAFM2 | AHR      | -0.607874798 | 0           |
| INAFM2 | BAX      | -0.369137517 | 1.32E-15    |
| INAFM2 | C1orf115 | -0.234710383 | 7.10E-07    |
| INAFM2 | PLK3     | -0.331261897 | 1.42E-12    |
| INAFM2 | JAG2     | -0.168655412 | 0.000393453 |
| INAFM2 | RAD23B   | -0.540534215 | 0           |
| INAFM2 | CA12     | 0.309456565  | 4.30E-11    |
| INAFM2 | ADTRP    | -0.370498444 | 9.67E-16    |
| INAFM2 | UCP2     | -0.360525166 | 7.99E-15    |
| INAFM2 | IGFBP2   | -0.182304825 | 0.000125625 |
| INAFM2 | LOXL2    | -0.268716686 | 1.22E-08    |
| INAFM2 | GPX1     | -0.241495162 | 3.30E-07    |
| INAFM2 | P3H3     | -0.333286763 | 1.02E-12    |
| INAFM2 | C2orf81  | -0.278858466 | 3.25E-09    |
| INAFM2 | CDT1     | -0.432675445 | 0           |
| INAFM2 | SNX25    | -0.235003135 | 6.87E-07    |
| INAFM2 | MTHFD1L  | -0.584424155 | 0           |
| INAFM2 | CDC42BPG | -0.672914876 | 3.43E-59    |
| INAFM2 | MSN      | -0.622393388 | 0           |
| INAFM2 | SIGLEC6  | -0.509952074 | 1.96E-30    |
| INAFM2 | F2R      | -0.239519371 | 4.14E-07    |
| INAFM2 | TMEM184A | -0.580157553 | 0           |
| INAFM2 | CKS2     | -0.266858194 | 1.55E-08    |
| INAFM2 | TAX1BP3  | -0.477237977 | 0           |
| INAFM2 | PMEPA1   | -0.447520971 | 0           |
| INAFM2 | CXCL16   | -0.628046591 | 0           |
| INAFM2 | FAXC     | -0.660454248 | 0           |
| INAFM2 | VTCN1    | -0.654423112 | 5.14E-55    |
| INAFM2 | SH2D4A   | -0.491752313 | 0           |
| INAFM2 | RNF24    | -0.466294533 | 0           |
| INAFM2 | LY6G6C   | -0.611627245 | 2.15E-46    |
| INAFM2 | NID1     | -0.413477506 | 0           |
| INAFM2 | STAC     | -0.784882148 | 0           |
| INAFM2 | RAB34    | -0.409103533 | 0           |
| INAFM2 | HES4     | -0.217505113 | 4.47E-06    |
| INAFM2 | EPHA10   | -0.686541784 | 0           |
| INAFM2 | ENTPD2   | -0.417341575 | 0           |
| INAFM2 | DDB2     | -0.533526185 | 0           |
| INAFM2 | NKAIN4   | -0.239470011 | 4.16E-07    |
| INAFM2 | TRIM29   | -0.5647695   | 0           |
| INAFM2 | ADCY8    | -0.595480817 | 1.79E-43    |
| INAFM2 | SFTA2    | -0.378960305 | 8.93E-17    |

|        |          |              |             |
|--------|----------|--------------|-------------|
| INAFM2 | NRIP1    | -0.609294304 | 0           |
| INAFM2 | VWA1     | 0.069026742  | 0.148725561 |
| INAFM2 | APLNR    | -0.132157314 | 0.005580072 |
| INAFM2 | REN      | -0.370040998 | 1.08E-15    |
| INAFM2 | EDIL3    | -0.155426547 | 0.001099692 |
| INAFM2 | AGRN     | -0.450817691 | 0           |
| INAFM2 | TREM1    | -0.394879112 | 0           |
| INAFM2 | SRL      | -0.29441956  | 3.83E-10    |
| INAFM2 | RASGRF1  | -0.504117106 | 0           |
| INAFM2 | RMI2     | -0.471879796 | 0           |
| INAFM2 | SAMD1    | -0.372612385 | 5.82E-16    |
| INAFM2 | MGAT4B   | -0.658638874 | 0           |
| INAFM2 | NXN      | -0.604111858 | 0           |
| INAFM2 | SH3BGRL3 | -0.44253653  | 0           |
| INAFM2 | CA11     | -0.141306944 | 0.003028809 |
| INAFM2 | PLD3     | -0.085365245 | 0.073984227 |
| INAFM2 | LURAP1L  | -0.523765946 | 0           |
| INAFM2 | CARNS1   | -0.200289631 | 2.45E-05    |
| INAFM2 | PDLIM7   | -0.333320804 | 1.01E-12    |
| INAFM2 | BCL2L1   | -0.608974603 | 0           |
| INAFM2 | GGT6     | -0.234618614 | 7.17E-07    |
| INAFM2 | DPYSL3   | -0.384299197 | 0           |
| INAFM2 | FYN      | -0.489547738 | 0           |
| INAFM2 | TK1      | -0.343338194 | 1.87E-13    |
| INAFM2 | AK1      | 0.007417515  | 0.876793614 |
| INAFM2 | HIGD1B   | 0.162389757  | 0.000646351 |
| INAFM2 | TMEM59L  | -0.412802078 | 0           |
| INAFM2 | MEGF9    | -0.504894516 | 0           |
| INAFM2 | ZFP36L1  | -0.543369256 | 0           |
| INAFM2 | ADRA1B   | -0.2632161   | 2.45E-08    |
| INAFM2 | EPHA4    | -0.592549579 | 0           |
| INAFM2 | TCERG1L  | -0.178048718 | 0.00018095  |
| INAFM2 | NGFR     | -0.248501207 | 1.46E-07    |
| INAFM2 | EBI3     | -0.542999487 | 0           |
| INAFM2 | S100A10  | -0.526920404 | 0           |
| INAFM2 | S100B    | -0.41388316  | 0           |
| INAFM2 | CD44     | -0.115336849 | 0.015657363 |
| INAFM2 | BHLHE41  | -0.539904033 | 0           |
| INAFM2 | FBXO2    | -0.259676555 | 3.80E-08    |
| INAFM2 | SLC30A2  | -0.477397118 | 0           |
| INAFM2 | FRMD5    | -0.616760752 | 0           |
| INAFM2 | SAMD11   | -0.325419058 | 3.65E-12    |
| INAFM2 | SIPA1L2  | -0.498963312 | 0           |
| INAFM2 | S100A16  | -0.571946176 | 0           |
| INAFM2 | PPL      | -0.765428759 | 0           |
| INAFM2 | ARHGD1B  | -0.057691402 | 0.227593614 |
| INAFM2 | CDC42EP3 | -0.634089278 | 0           |
| INAFM2 | RUNX2    | -0.469435517 | 0           |
| INAFM2 | LAMC2    | -0.66647339  | 0           |
| INAFM2 | BRINP1   | -0.504651407 | 0           |
| INAFM2 | GPRC5B   | -0.537379899 | 0           |

|        |          |              |             |
|--------|----------|--------------|-------------|
| INAFM2 | AQP5     | -0.0387882   | 0.41739429  |
| INAFM2 | PLAG1    | -0.31799204  | 1.17E-11    |
| INAFM2 | PTPRU    | -0.669734226 | 0           |
| INAFM2 | ANGPTL4  | -0.390009134 | 0           |
| INAFM2 | PALM3    | -0.388822241 | 0           |
| INAFM2 | ACP5     | -0.375131696 | 3.01E-16    |
| INAFM2 | DLG4     | -0.183120956 | 0.000117026 |
| INAFM2 | ETNK2    | -0.406192893 | 0           |
| INAFM2 | CD109    | -0.609510747 | 0           |
| INAFM2 | SNX22    | -0.24309551  | 2.75E-07    |
| INAFM2 | TMEM98   | -0.61415024  | 0           |
| INAFM2 | CTHRC1   | -0.458053796 | 0           |
| INAFM2 | S100A2   | -0.487674637 | 0           |
| INAFM2 | C11orf80 | -0.606951012 | 0           |
| INAFM2 | SREBF1   | -0.461521146 | 0           |
| INAFM2 | PRSS22   | -0.604576517 | 0           |
| INAFM2 | CMTM3    | -0.449686965 | 0           |
| INAFM2 | RDH5     | -0.451322915 | 0           |
| INAFM2 | MYH10    | -0.577535551 | 0           |
| INAFM2 | EVPL     | -0.494623522 | 0           |
| INAFM2 | SCD      | -0.528824142 | 0           |
| INAFM2 | CD151    | -0.389599934 | 0           |
| INAFM2 | S100A4   | -0.421560237 | 0           |
| INAFM2 | BNIP1    | -0.304873524 | 8.48E-11    |
| INAFM2 | MAP3K6   | -0.508421722 | 0           |
| INAFM2 | MANEAL   | -0.422733372 | 0           |
| INAFM2 | CD207    | -0.402812349 | 1.48E-18    |
| INAFM2 | CD1A     | -0.440804761 | 2.70E-22    |
| INAFM2 | C3       | -0.491730186 | 0           |
| INAFM2 | NT5E     | -0.534300048 | 0           |
| INAFM2 | CACNG4   | -0.619177103 | 8.07E-48    |
| INAFM2 | FHOD1    | -0.396161745 | 0           |
| INAFM2 | LEMD1    | -0.618566055 | 0           |
| INAFM2 | ATP11A   | -0.288037598 | 9.35E-10    |
| INAFM2 | PPAP2C   | -0.302927944 | 1.13E-10    |
| INAFM2 | DRAM1    | -0.65837988  | 0           |
| INAFM2 | CDA      | -0.088377156 | 0.064322811 |
| INAFM2 | CCND2    | -0.164689221 | 0.000539791 |
| INAFM2 | LCN6     | -0.195162084 | 3.84E-05    |
| INAFM2 | CDH4     | -0.475525719 | 0           |
| INAFM2 | MMP11    | -0.501406599 | 0           |
| INAFM2 | B3GAT1   | -0.452134507 | 0           |
| INAFM2 | SPP1     | -0.307875365 | 5.44E-11    |
| INAFM2 | HLA-DQB1 | -0.356544365 | 1.72E-14    |
| INAFM2 | SDC3     | -0.5347179   | 0           |
| INAFM2 | CX3CL1   | -0.411280874 | 0           |
| INAFM2 | SDK1     | -0.45376918  | 0           |
| INAFM2 | DOCK9    | -0.628997467 | 0           |
| INAFM2 | CSF2     | -0.526560457 | 1.11E-32    |
| INAFM2 | GRHL3    | -0.636390302 | 0           |
| INAFM2 | TMEM92   | -0.6534925   | 8.18E-55    |



|        |          |              |             |
|--------|----------|--------------|-------------|
| INAFM2 | BASP1    | -0.600613871 | 0           |
| INAFM2 | HRH1     | -0.69744523  | 0           |
| INAFM2 | ESM1     | 0.020707654  | 0.665124717 |
| INAFM2 | B4GALNT3 | -0.575661599 | 0           |
| INAFM2 | LM03     | -0.156633155 | 0.001004465 |
| INAFM2 | C9orf16  | -0.429255327 | 0           |
| INAFM2 | SEMA3F   | -0.146556194 | 0.002099144 |
| INAFM2 | PLA2G12B | -0.103736363 | 0.02976622  |
| INAFM2 | KLK6     | -0.525614987 | 1.50E-32    |
| INAFM2 | ST3GAL5  | -0.191703521 | 5.45E-05    |
| INAFM2 | FAM132B  | -0.126919127 | 0.007792261 |
| INAFM2 | CDKN1A   | -0.274487897 | 5.78E-09    |
| INAFM2 | E2F1     | -0.424209329 | 0           |
| INAFM2 | B3GNT8   | -0.28722402  | 1.05E-09    |
| INAFM2 | MTMR11   | -0.655230953 | 0           |
| INAFM2 | MYO1G    | -0.553121126 | 0           |
| INAFM2 | TMSB10   | -0.438898833 | 0           |
| INAFM2 | UNC5CL   | -0.66715435  | 0           |
| INAFM2 | ABR      | -0.588166244 | 0           |
| INAFM2 | PLP2     | -0.468372731 | 0           |
| INAFM2 | SRCIN1   | -0.453614294 | 0           |
| INAFM2 | PDE9A    | -0.581294519 | 0           |
| INAFM2 | TREM2    | -0.273531347 | 6.55E-09    |
| INAFM2 | KDEL3    | -0.407799624 | 0           |
| INAFM2 | PC       | -0.530154574 | 0           |
| INAFM2 | C2CD4A   | -0.707576514 | 0           |
| INAFM2 | PELI1    | -0.564265411 | 0           |
| INAFM2 | SSX1     | -0.317465541 | 1.27E-11    |
| INAFM2 | MROH6    | -0.465600099 | 0           |
| INAFM2 | ESPN     | -0.38218398  | 1.53E-17    |
| INAFM2 | BMP1     | -0.317957148 | 1.18E-11    |
| INAFM2 | TM4SF4   | -0.480367812 | 1.00E-26    |
| INAFM2 | CORO2A   | -0.590781863 | 0           |
| INAFM2 | CD164L2  | -0.409620189 | 3.43E-19    |
| INAFM2 | CTSS     | -0.50350054  | 0           |
| INAFM2 | CLU      | -0.500849463 | 0           |
| INAFM2 | TMSB4X   | -0.42119302  | 0           |
| INAFM2 | WNT10A   | -0.58588673  | 8.16E-42    |
| INAFM2 | NAPSA    | -0.344267794 | 1.59E-13    |
| INAFM2 | PLEKHA4  | -0.506417137 | 0           |
| INAFM2 | SFTPA1   | 0.053743126  | 0.261163545 |
| INAFM2 | C1orf116 | -0.553446784 | 0           |
| INAFM2 | TM4SF1   | -0.495383343 | 0           |
| INAFM2 | SEL1L3   | -0.669300771 | 0           |
| INAFM2 | VASN     | -0.537958737 | 0           |
| INAFM2 | NPTXR    | -0.6756833   | 0           |
| INAFM2 | PDE4C    | -0.529299722 | 0           |
| INAFM2 | CDC42EP1 | -0.574347762 | 0           |
| INAFM2 | ENDOD1   | -0.675845278 | 0           |
| INAFM2 | RYR1     | -0.420936579 | 0           |
| INAFM2 | IL1RAP   | -0.620613616 | 0           |

|        |          |              |             |
|--------|----------|--------------|-------------|
| INAFM2 | SLC35F2  | -0.676554275 | 4.75E-60    |
| INAFM2 | ISYNA1   | -0.251409294 | 1.04E-07    |
| INAFM2 | HLA-G    | -0.574555412 | 0           |
| INAFM2 | CDKN2B   | -0.600041275 | 0           |
| INAFM2 | ALDH1A3  | -0.556974274 | 0           |
| INAFM2 | CLIP3    | -0.471267627 | 0           |
| INAFM2 | ULBP2    | -0.462302527 | 0           |
| INAFM2 | ETHE1    | -0.670266966 | 0           |
| INAFM2 | XPR1     | -0.594020856 | 0           |
| INAFM2 | SPTBN2   | -0.725611389 | 0           |
| INAFM2 | IVL      | -0.551221991 | 2.94E-36    |
| INAFM2 | MARCO    | -0.493298621 | 0           |
| INAFM2 | PLXND1   | -0.242436109 | 2.96E-07    |
| INAFM2 | EMILIN2  | -0.384812789 | 0           |
| INAFM2 | PLAUR    | -0.541037595 | 0           |
| INAFM2 | CDC42EP5 | -0.491973011 | 0           |
| INAFM2 | TRPC5    | -0.25573539  | 5.52E-08    |
| INAFM2 | TMEM100  | -0.372407997 | 6.12E-16    |
| INAFM2 | QSOX1    | -0.670699995 | 0           |
| INAFM2 | ARHGAP23 | -0.509852291 | 0           |
| INAFM2 | MDF1     | -0.320382989 | 8.08E-12    |
| INAFM2 | FSTL3    | -0.598384759 | 0           |
| INAFM2 | INF2     | -0.465334863 | 0           |
| INAFM2 | TGFBR1   | -0.607499496 | 0           |
| INAFM2 | TGFBI    | -0.367501142 | 1.90E-15    |
| INAFM2 | ERBB3    | -0.71786538  | 0           |
| INAFM2 | CCL18    | -0.38397439  | 0           |
| INAFM2 | CCL17    | -0.453550129 | 1.17E-23    |
| INAFM2 | C16orf45 | -0.393720019 | 0           |
| INAFM2 | PRDM1    | -0.257714947 | 4.84E-08    |
| INAFM2 | TRIM47   | -0.567393629 | 0           |
| INAFM2 | CNFN     | -0.42021789  | 0           |
| INAFM2 | ARMCX3   | -0.394133474 | 0           |
| INAFM2 | RAMP1    | -0.309362102 | 4.36E-11    |
| INAFM2 | GABRD    | 0.048717225  | 0.308342502 |
| INAFM2 | COL13A1  | -0.124279396 | 0.009180335 |
| INAFM2 | S100A5   | -0.41565655  | 0           |
| INAFM2 | MISP     | -0.594929464 | 0           |
| INAFM2 | HES6     | -0.144774011 | 0.002380548 |
| INAFM2 | PSD3     | -0.58385085  | 0           |
| INAFM2 | DOK7     | -0.604883452 | 0           |
| INAFM2 | ZMAT3    | -0.593770939 | 0           |
| INAFM2 | MFAP2    | -0.372980878 | 5.31E-16    |
| INAFM2 | TMEM79   | -0.550548059 | 0           |
| INAFM2 | SLC1A5   | -0.443269686 | 0           |
| INAFM2 | BBC3     | -0.490930934 | 0           |
| INAFM2 | HLA-DQB2 | -0.435194331 | 0           |
| INAFM2 | C1QL1    | -0.422784575 | 0           |
| INAFM2 | TMEM215  | -0.173236293 | 0.000265356 |
| INAFM2 | PNP      | -0.466529699 | 0           |
| INAFM2 | ARNTL    | -0.653631598 | 0           |

|        |           |              |             |
|--------|-----------|--------------|-------------|
| INAFM2 | CLDN2     | -0.230816749 | 1.02E-06    |
| INAFM2 | MVP       | -0.577765611 | 0           |
| INAFM2 | LGALS1    | -0.425761453 | 0           |
| INAFM2 | BIRC7     | -0.378683708 | 2.04E-16    |
| INAFM2 | COL8A1    | -0.616390699 | 0           |
| INAFM2 | PERP      | -0.71039425  | 0           |
| INAFM2 | GJA4      | -0.164501428 | 0.00054784  |
| INAFM2 | IGFL2     | -0.505391811 | 7.72E-30    |
| INAFM2 | DAPK2     | -0.510357089 | 0           |
| INAFM2 | MAMLD1    | -0.629983235 | 0           |
| INAFM2 | ETV5      | -0.198939626 | 2.79E-05    |
| INAFM2 | RUNX1     | -0.750614297 | 0           |
| INAFM2 | LONRF2    | -0.348980617 | 6.91E-14    |
| INAFM2 | SPOCK1    | -0.173298451 | 0.000269329 |
| INAFM2 | XKRX      | -0.394709617 | 0           |
| INAFM2 | TGFB1     | -0.266487715 | 1.62E-08    |
| INAFM2 | ERP27     | -0.280854824 | 2.48E-09    |
| INAFM2 | TNFRSF10C | -0.43086149  | 0           |
| INAFM2 | PALM      | -0.592300371 | 0           |
| INAFM2 | TSC22D1   | -0.312688608 | 2.64E-11    |
| INAFM2 | TGM2      | -0.624418539 | 0           |
| INAFM2 | UBE2QL1   | -0.193870934 | 4.47E-05    |
| INAFM2 | ECE1      | -0.530512855 | 0           |
| INAFM2 | COL8A2    | -0.617918001 | 0           |
| INAFM2 | HIST3H2A  | -0.464234207 | 0           |
| INAFM2 | TNFRSF21  | -0.638581969 | 0           |
| INAFM2 | SOX4      | -0.697131628 | 0           |
| INAFM2 | ELF3      | -0.714924103 | 0           |
| INAFM2 | TPD52L1   | -0.529665662 | 0           |
| INAFM2 | INHBB     | -0.396672501 | 0           |
| INAFM2 | HPN       | -0.322795071 | 5.53E-12    |
| INAFM2 | MMP7      | -0.541899055 | 7.17E-35    |
| INAFM2 | RAB27A    | -0.521635552 | 0           |
| INAFM2 | IGF2BP2   | -0.501853953 | 0           |
| INAFM2 | ITGB4     | -0.612770732 | 0           |
| INAFM2 | PPP1R1B   | -0.428690531 | 0           |
| INAFM2 | NPDC1     | -0.198432274 | 2.93E-05    |
| INAFM2 | CCL13     | -0.558926434 | 1.95E-37    |
| INAFM2 | SPINT1    | -0.668336846 | 0           |
| INAFM2 | HEY2      | -0.20196799  | 2.09E-05    |
| INAFM2 | CST2      | -0.631181526 | 3.63E-50    |
| INAFM2 | ADM       | -0.241752454 | 3.21E-07    |
| INAFM2 | VSTM2L    | -0.416927411 | 0           |
| INAFM2 | FAM84A    | -0.584737615 | 0           |
| INAFM2 | P4HA2     | -0.382070226 | 1.70E-17    |
| INAFM2 | LPL       | -0.328574225 | 2.20E-12    |
| INAFM2 | TMEM173   | -0.407276103 | 0           |
| INAFM2 | DHRS3     | -0.404745161 | 0           |
| INAFM2 | SCN1B     | -0.417924526 | 0           |
| INAFM2 | GLT1D1    | -0.216909965 | 4.76E-06    |
| INAFM2 | PHYHIP    | -0.407134266 | 0           |

|        |            |              |             |
|--------|------------|--------------|-------------|
| INAFM2 | BHLHE40    | -0.574348187 | 0           |
| INAFM2 | BID        | -0.509877768 | 0           |
| INAFM2 | POSTN      | -0.424612288 | 0           |
| INAFM2 | ITGA3      | -0.754795655 | 0           |
| INAFM2 | RSP04      | -0.624179685 | 0           |
| INAFM2 | ADAMTS9    | -0.093764556 | 0.049637504 |
| INAFM2 | ABTB2      | -0.797950312 | 0           |
| INAFM2 | KCNQ3      | -0.804987703 | 0           |
| INAFM2 | ANXA1      | -0.463336804 | 0           |
| INAFM2 | S100A11    | -0.543108559 | 0           |
| INAFM2 | CEACAM6    | -0.595397933 | 1.85E-43    |
| INAFM2 | IER5L      | -0.470124561 | 0           |
| INAFM2 | KRT80      | -0.655769509 | 0           |
| INAFM2 | CDH6       | -0.610212132 | 0           |
| INAFM2 | UNC5B      | -0.489088328 | 0           |
| INAFM2 | PLEKHN1    | -0.645578653 | 0           |
| INAFM2 | SYTL1      | -0.328401325 | 2.26E-12    |
| INAFM2 | TMEM163    | -0.588193619 | 0           |
| INAFM2 | C4orf48    | -0.12518687  | 0.008680119 |
| INAFM2 | B3GNT7     | -0.317777724 | 1.21E-11    |
| INAFM2 | BAIAP3     | -0.471908163 | 0           |
| INAFM2 | PHLDA2     | -0.372273678 | 6.33E-16    |
| INAFM2 | GAP43      | -0.570587588 | 2.79E-39    |
| INAFM2 | S100A1     | -0.426199446 | 0           |
| INAFM2 | PTPRE      | -0.727489171 | 0           |
| INAFM2 | CCND1      | -0.477830005 | 0           |
| INAFM2 | ST6GALNAC5 | -0.779352045 | 9.33E-91    |
| INAFM2 | KRT17      | -0.247712167 | 1.61E-07    |
| INAFM2 | HPCAL4     | -0.309277567 | 4.41E-11    |
| INAFM2 | GABBR2     | -0.258668518 | 4.30E-08    |
| INAFM2 | DIRAS3     | -0.294857269 | 3.60E-10    |
| INAFM2 | SERINC2    | -0.370648508 | 9.34E-16    |
| INAFM2 | PTCHD4     | -0.438298295 | 0           |
| INAFM2 | EPS8       | -0.464903537 | 0           |
| INAFM2 | LY6E       | -0.482369077 | 0           |
| INAFM2 | UPP1       | -0.583548737 | 0           |
| INAFM2 | AHNAK2     | -0.743940576 | 0           |
| INAFM2 | PLXNC1     | -0.443277913 | 0           |
| INAFM2 | TNC        | -0.587563578 | 0           |
| INAFM2 | DUSP4      | -0.367436606 | 1.92E-15    |
| INAFM2 | NRCAM      | -0.53043683  | 0           |
| INAFM2 | NRP2       | -0.455877589 | 0           |
| INAFM2 | CTSC       | -0.546147278 | 0           |
| INAFM2 | AMIG02     | -0.360960464 | 7.33E-15    |
| INAFM2 | NAB2       | -0.336487177 | 5.98E-13    |
| INAFM2 | TBC1D2     | -0.750692165 | 0           |
| INAFM2 | PHLDA3     | -0.458584834 | 0           |
| INAFM2 | PTP4A3     | -0.339238533 | 3.76E-13    |
| INAFM2 | CRABP2     | -0.214878857 | 5.85E-06    |
| INAFM2 | GOS2       | -0.319316657 | 9.54E-12    |
| INAFM2 | S100A6     | -0.594128085 | 0           |

|        |         |              |             |
|--------|---------|--------------|-------------|
| INAFM2 | FOXQ1   | -0.593234227 | 0           |
| INAFM2 | LRG1    | -0.532647504 | 0           |
| INAFM2 | LAMP5   | -0.475627133 | 0           |
| INAFM2 | ALDH3B1 | -0.634760735 | 0           |
| INAFM2 | CDH2    | -0.001805161 | 0.969904083 |
| INAFM2 | SCG5    | -0.173372348 | 0.000267688 |
| INAFM2 | ZCCHC16 | -0.209289918 | 9.79E-06    |
| INAFM2 | GRB7    | -0.670798288 | 0           |
| INAFM2 | TIAM1   | -0.517897435 | 0           |
| INAFM2 | FXYD5   | -0.246949934 | 1.76E-07    |
| INAFM2 | CLDN9   | -0.376378302 | 2.11E-16    |
| INAFM2 | FAM43A  | -0.544614019 | 0           |
| INAFM2 | CHST2   | -0.499462154 | 0           |
| INAFM2 | HMGA2   | -0.360482615 | 8.05E-15    |
| INAFM2 | GALNT7  | -0.510362479 | 0           |
| INAFM2 | CBLN1   | -0.418792143 | 0           |
| INAFM2 | STRA6   | -0.574354712 | 0           |
| INAFM2 | MUC21   | -0.570145673 | 3.29E-39    |
| INAFM2 | PRR36   | -0.509765061 | 0           |
| INAFM2 | NFE2L3  | -0.598142075 | 0           |
| INAFM2 | NR1D1   | -0.361300306 | 6.85E-15    |
| INAFM2 | MUC1    | -0.694223399 | 0           |
| INAFM2 | NAT8L   | -0.120283135 | 0.011701626 |
| INAFM2 | APOC1   | -0.112722223 | 0.018189018 |
| INAFM2 | EVA1A   | -0.689224208 | 0           |
| INAFM2 | ENTPD1  | -0.291093479 | 6.12E-10    |
| INAFM2 | COL1A1  | -0.498371993 | 0           |
| INAFM2 | FNDC4   | -0.402014229 | 0           |
| INAFM2 | FRMD3   | -0.068824908 | 0.149918994 |
| INAFM2 | SHROOM4 | -0.547343958 | 0           |
| INAFM2 | NELL2   | -0.246337198 | 1.89E-07    |
| INAFM2 | EPHB3   | -0.645248172 | 0           |
| INAFM2 | TMC6    | -0.535335601 | 0           |
| INAFM2 | NOD1    | -0.535464247 | 0           |
| INAFM2 | GGCT    | -0.547259281 | 0           |
| INAFM2 | ICAM1   | -0.632532899 | 0           |
| INAFM2 | PRSS23  | -0.457857919 | 0           |
| INAFM2 | CFI     | -0.558681709 | 0           |
| INAFM2 | CD55    | -0.696918588 | 0           |
| INAFM2 | RASD2   | -0.541216594 | 0           |
| INAFM2 | KLK11   | -0.432876136 | 1.78E-21    |
| INAFM2 | ICAM5   | -0.467852614 | 0           |
| INAFM2 | ADORA1  | -0.399632358 | 0           |
| INAFM2 | ITGA2   | -0.691516154 | 0           |
| INAFM2 | ABCC3   | -0.456024248 | 0           |
| INAFM2 | MFGE8   | -0.577891563 | 0           |
| INAFM2 | STK32A  | -0.345063642 | 1.38E-13    |
| INAFM2 | CYSLTR2 | -0.44592275  | 0           |
| INAFM2 | LAD1    | -0.627979502 | 0           |
| INAFM2 | MGAT3   | -0.684309409 | 0           |
| INAFM2 | IGFBP6  | -0.345705314 | 1.23E-13    |

|        |           |              |             |
|--------|-----------|--------------|-------------|
| INAFM2 | CYP2S1    | -0.689111305 | 0           |
| INAFM2 | KCNJ2     | -0.387453655 | 0           |
| INAFM2 | FAM20A    | -0.49691178  | 0           |
| INAFM2 | TGFA      | -0.369294672 | 1.27E-15    |
| INAFM2 | MXRA8     | -0.566018802 | 0           |
| INAFM2 | C8orf4    | -0.394862092 | 0           |
| INAFM2 | CLDN10    | -0.574920428 | 5.52E-40    |
| INAFM2 | PDE5A     | -0.594058017 | 0           |
| INAFM2 | APOE      | -0.120647373 | 0.011448793 |
| INAFM2 | SPOCK2    | -0.626777999 | 0           |
| INAFM2 | TENM1     | -0.101626163 | 0.033312826 |
| INAFM2 | SLIT1     | -0.088503817 | 0.063940434 |
| INAFM2 | CXCL14    | -0.336214991 | 6.26E-13    |
| INAFM2 | ECM1      | -0.045226046 | 0.34432996  |
| INAFM2 | DUSP5     | -0.607873095 | 0           |
| INAFM2 | SEZ6L2    | -0.455459879 | 0           |
| INAFM2 | THRSP     | -0.101894944 | 0.032847369 |
| INAFM2 | C19orf33  | -0.583702346 | 0           |
| INAFM2 | MPZL2     | -0.550684648 | 0           |
| INAFM2 | CTSH      | -0.478092971 | 0           |
| INAFM2 | CYP1B1    | -0.585402406 | 0           |
| INAFM2 | ALOX5     | -0.67221212  | 0           |
| INAFM2 | SYTL5     | -0.584115397 | 1.63E-41    |
| INAFM2 | TNFRSF12A | -0.42285138  | 0           |
| INAFM2 | DUSP6     | -0.467412777 | 0           |
| INAFM2 | ALOX15B   | -0.599591651 | 0           |
| INAFM2 | SDC4      | -0.539579651 | 0           |
| INAFM2 | MDK       | -0.477351731 | 0           |
| INAFM2 | KRT19     | -0.663849119 | 0           |
| INAFM2 | MET       | -0.704968697 | 0           |
| INAFM2 | TESC      | -0.106103394 | 0.026252731 |
| INAFM2 | CXCL17    | -0.673186636 | 2.96E-59    |
| INAFM2 | NPC2      | -0.301657934 | 1.36E-10    |
| INAFM2 | COMP      | -0.472770675 | 0           |
| INAFM2 | TUSC3     | -0.49423659  | 0           |
| INAFM2 | TMPRSS4   | -0.741132768 | 0           |
| INAFM2 | LGALS3    | -0.573738004 | 0           |
| INAFM2 | CRLF1     | -0.4687564   | 0           |
| INAFM2 | CTXN1     | -0.565767467 | 0           |
| INAFM2 | PCSK1N    | -0.232467654 | 9.09E-07    |
| INAFM2 | NMU       | -0.496987308 | 9.17E-29    |
| INAFM2 | GALE      | -0.415912566 | 0           |
| INAFM2 | PCSK2     | -0.11405606  | 0.016856038 |
| INAFM2 | GJB3      | -0.540321034 | 0           |
| INAFM2 | SLPI      | -0.600410193 | 0           |
| INAFM2 | AGR2      | -0.290505564 | 6.64E-10    |
| INAFM2 | MRC2      | -0.517991615 | 0           |
| INAFM2 | GOLT1A    | -0.331394798 | 1.39E-12    |
| INAFM2 | SLC27A6   | -0.674040638 | 1.86E-59    |
| INAFM2 | KCNN4     | -0.626331354 | 0           |
| INAFM2 | ETV4      | -0.390193749 | 2.05E-17    |

|         |          |              |             |
|---------|----------|--------------|-------------|
| INAFM2  | SYT12    | -0.608552637 | 0           |
| INAFM2  | PVRL4    | -0.708784541 | 0           |
| INAFM2  | PLCD3    | -0.639265199 | 0           |
| INAFM2  | PLAU     | -0.533486896 | 0           |
| INAFM2  | LRRK2    | -0.11778666  | 0.01357144  |
| INAFM2  | SFN      | -0.617928923 | 0           |
| INAFM2  | LPAR5    | -0.560290426 | 0           |
| INAFM2  | NGEF     | -0.663114261 | 0           |
| INAFM2  | DTX4     | -0.66976387  | 0           |
| INAFM2  | CST6     | -0.526337311 | 0           |
| INAFM2  | QPCT     | -0.406367069 | 0           |
| INAFM2  | TIMP1    | -0.474060967 | 0           |
| INAFM2  | CAMK2N1  | -0.547254033 | 0           |
| INAFM2  | KLHDC8A  | -0.162638823 | 0.000633932 |
| INAFM2  | PDLIM4   | -0.654283907 | 0           |
| INAFM2  | SCEL     | -0.549175926 | 0           |
| INAFM2  | LCN2     | -0.689791698 | 0           |
| INAFM2  | PROS1    | -0.737828672 | 0           |
| INAFM2  | GABRB2   | -0.667072935 | 0           |
| INAFM2  | TMPRSS6  | -0.707968268 | 0           |
| INAFM2  | KLK7     | -0.579466396 | 9.81E-41    |
| INAFM2  | PDZK1IP1 | -0.504373264 | 0           |
| INAFM2  | CDH3     | -0.519008303 | 0           |
| INAFM2  | LRP4     | -0.263433395 | 2.38E-08    |
| INAFM2  | IGSF1    | -0.33495803  | 7.72E-13    |
| INAFM2  | B3GNT3   | -0.72318952  | 0           |
| INAFM2  | CLDN1    | -0.61821515  | 0           |
| INAFM2  | GDF15    | -0.608639158 | 0           |
| INAFM2  | ARHGAP36 | -0.268222958 | 1.14E-08    |
| INAFM2  | LAMB3    | -0.656844493 | 0           |
| INAFM2  | KLK10    | -0.584755487 | 0           |
| INAFM2  | DPP4     | -0.603401822 | 0           |
| INAFM2  | METTL7B  | -0.377834402 | 1.33E-16    |
| INAFM2  | LIPH     | -0.640725695 | 0           |
| INAFM2  | CLDN16   | -0.554787996 | 0           |
| INAFM2  | CHI3L1   | -0.514796308 | 0           |
| INAFM2  | SLC22A31 | -0.43547589  | 9.65E-22    |
| INAFM2  | TACSTD2  | -0.671469461 | 0           |
| INAFM2  | SFTPB    | -0.631609823 | 0           |
| INAFM2  | RXRG     | -0.246647963 | 1.82E-07    |
| INAFM2  | DCSTAMP  | -0.705634859 | 2.24E-67    |
| INAFM2  | CITED1   | -0.326372771 | 3.13E-12    |
| INAFM2  | SERPINA1 | -0.645097258 | 0           |
| INAFM2  | PRR15    | -0.308062448 | 5.29E-11    |
| INAFM2  | SLC34A2  | -0.733777094 | 0           |
| INAFM2  | FN1      | -0.823209661 | 0           |
| INAFM2  | ZCCHC12  | -0.203211193 | 1.86E-05    |
| ST7-AS1 | TFF3     | 0.658520582  | 0           |
| ST7-AS1 | CCL21    | 0.417882477  | 5.55E-20    |
| ST7-AS1 | TPO      | 0.592697657  | 0           |
| ST7-AS1 | MT1G     | 0.573968206  | 0           |

|         |           |             |          |
|---------|-----------|-------------|----------|
| ST7-AS1 | DIO1      | 0.538342123 | 0        |
| ST7-AS1 | DPT       | 0.381007292 | 1.29E-16 |
| ST7-AS1 | CDH16     | 0.630062522 | 0        |
| ST7-AS1 | CRABP1    | 0.59966569  | 3.25E-44 |
| ST7-AS1 | SLC26A7   | 0.593441593 | 0        |
| ST7-AS1 | MT1H      | 0.559181339 | 1.78E-37 |
| ST7-AS1 | SLC26A4   | 0.608534198 | 0        |
| ST7-AS1 | SLC5A8    | 0.579232514 | 1.07E-40 |
| ST7-AS1 | PKHD1L1   | 0.52713441  | 9.21E-33 |
| ST7-AS1 | TFCP2L1   | 0.590777892 | 0        |
| ST7-AS1 | WSCD2     | 0.572718286 | 1.26E-39 |
| ST7-AS1 | IPCEF1    | 0.526217885 | 0        |
| ST7-AS1 | SLC5A5    | 0.505686984 | 7.07E-30 |
| ST7-AS1 | MT1F      | 0.61720683  | 0        |
| ST7-AS1 | FOSB      | 0.41489148  | 0        |
| ST7-AS1 | SEMA3D    | 0.509947907 | 1.96E-30 |
| ST7-AS1 | BMP8A     | 0.467407104 | 0        |
| ST7-AS1 | MATN2     | 0.612614427 | 0        |
| ST7-AS1 | PLA2R1    | 0.476315327 | 0        |
| ST7-AS1 | COL23A1   | 0.681725562 | 0        |
| ST7-AS1 | HGD       | 0.58583274  | 0        |
| ST7-AS1 | TCEAL2    | 0.513846708 | 0        |
| ST7-AS1 | CHRD1     | 0.276368667 | 3.88E-09 |
| ST7-AS1 | TNFRSF11B | 0.428178216 | 0        |
| ST7-AS1 | FAM167A   | 0.535807493 | 0        |
| ST7-AS1 | KIT       | 0.546559599 | 0        |
| ST7-AS1 | SLC4A4    | 0.574366201 | 0        |
| ST7-AS1 | SMOC2     | 0.466171561 | 0        |
| ST7-AS1 | FHL1      | 0.561583555 | 0        |
| ST7-AS1 | OTOS      | 0.64513527  | 0        |
| ST7-AS1 | IGFBPL1   | 0.548041591 | 8.85E-36 |
| ST7-AS1 | HBB       | 0.391410911 | 0        |
| ST7-AS1 | BEX1      | 0.53342009  | 0        |
| ST7-AS1 | FABP4     | 0.541806288 | 7.40E-35 |
| ST7-AS1 | LMOD1     | 0.569784294 | 0        |
| ST7-AS1 | SOD3      | 0.588190073 | 0        |
| ST7-AS1 | TMEM171   | 0.567787653 | 0        |
| ST7-AS1 | PI16      | 0.417830346 | 0        |
| ST7-AS1 | ZMAT4     | 0.60034289  | 2.46E-44 |
| ST7-AS1 | MFAP4     | 0.297750889 | 2.39E-10 |
| ST7-AS1 | CWH43     | 0.552055311 | 2.20E-36 |
| ST7-AS1 | SPX       | 0.603389198 | 0        |
| ST7-AS1 | APOD      | 0.273763109 | 6.35E-09 |
| ST7-AS1 | DPP6      | 0.597297293 | 0        |
| ST7-AS1 | MMRN1     | 0.378262892 | 1.15E-16 |
| ST7-AS1 | WDR72     | 0.561774751 | 0        |
| ST7-AS1 | MPPED2    | 0.609670881 | 0        |
| ST7-AS1 | PAPSS2    | 0.42190405  | 0        |
| ST7-AS1 | DCN       | 0.193638463 | 4.57E-05 |
| ST7-AS1 | SORBS2    | 0.511093082 | 0        |
| ST7-AS1 | EGR2      | 0.359710028 | 9.37E-15 |



|         |            |             |          |
|---------|------------|-------------|----------|
| ST7-AS1 | EDN3       | 0.520739246 | 7.02E-32 |
| ST7-AS1 | DIO2       | 0.518159266 | 0        |
| ST7-AS1 | ITPR1      | 0.513625726 | 0        |
| ST7-AS1 | CFD        | 0.429747785 | 0        |
| ST7-AS1 | CPXM1      | 0.466716499 | 0        |
| ST7-AS1 | ELM01      | 0.545238953 | 0        |
| ST7-AS1 | GPC3       | 0.465577492 | 5.32E-25 |
| ST7-AS1 | MYOC       | 0.347980226 | 6.09E-14 |
| ST7-AS1 | DEPTOR     | 0.533786739 | 0        |
| ST7-AS1 | DGKI       | 0.477763058 | 0        |
| ST7-AS1 | CARTPT     | 0.541942274 | 7.06E-35 |
| ST7-AS1 | IYD        | 0.38675383  | 0        |
| ST7-AS1 | LYVE1      | 0.384870375 | 0        |
| ST7-AS1 | CLCNKB     | 0.653085525 | 0        |
| ST7-AS1 | NCAM1      | 0.401699634 | 0        |
| ST7-AS1 | HBA2       | 0.437239055 | 0        |
| ST7-AS1 | GLT8D2     | 0.483437962 | 0        |
| ST7-AS1 | OGDHL      | 0.542118678 | 0        |
| ST7-AS1 | LIFR       | 0.496136215 | 0        |
| ST7-AS1 | CSGALNACT1 | 0.414553908 | 0        |
| ST7-AS1 | RAP1GAP    | 0.552519595 | 0        |
| ST7-AS1 | COL9A3     | 0.58920818  | 0        |
| ST7-AS1 | FBLN1      | 0.229834022 | 1.21E-06 |
| ST7-AS1 | EFEMP1     | 0.371227912 | 8.15E-16 |
| ST7-AS1 | AOX1       | 0.438454048 | 4.75E-22 |
| ST7-AS1 | GRIN2C     | 0.572147017 | 0        |
| ST7-AS1 | C11orf74   | 0.696209261 | 0        |
| ST7-AS1 | PPARGC1A   | 0.568546481 | 0        |
| ST7-AS1 | ANGPTL1    | 0.507608569 | 0        |
| ST7-AS1 | SCARA5     | 0.327634266 | 1.92E-12 |
| ST7-AS1 | LTF        | 0.473559573 | 0        |
| ST7-AS1 | CA4        | 0.596127561 | 1.38E-43 |
| ST7-AS1 | TG         | 0.494982653 | 0        |
| ST7-AS1 | FCGBP      | 0.60427795  | 0        |
| ST7-AS1 | PBX4       | 0.714020175 | 0        |
| ST7-AS1 | CYR61      | 0.447626497 | 0        |
| ST7-AS1 | FOS        | 0.361449802 | 6.65E-15 |
| ST7-AS1 | KHDRBS2    | 0.60478828  | 0        |
| ST7-AS1 | MUM1L1     | 0.490088279 | 0        |
| ST7-AS1 | RGS16      | 0.533278395 | 0        |
| ST7-AS1 | MT1M       | 0.586032588 | 0        |
| ST7-AS1 | LRP2       | 0.437190405 | 0        |
| ST7-AS1 | MAFB       | 0.469581183 | 0        |
| ST7-AS1 | KCNK2      | 0.48160727  | 0        |
| ST7-AS1 | TBC1D4     | 0.461803828 | 0        |
| ST7-AS1 | MIOX       | 0.676399744 | 5.17E-60 |
| ST7-AS1 | TPPP       | 0.591131633 | 0        |
| ST7-AS1 | FMOD       | 0.444510761 | 0        |
| ST7-AS1 | CITED2     | 0.466923014 | 0        |
| ST7-AS1 | RGS8       | 0.562346257 | 5.71E-38 |
| ST7-AS1 | ABI3BP     | 0.398191577 | 0        |

|         |          |             |             |
|---------|----------|-------------|-------------|
| ST7-AS1 | ADH1B    | 0.351680901 | 3.17E-14    |
| ST7-AS1 | OGN      | 0.271152585 | 7.76E-09    |
| ST7-AS1 | NR4A1    | 0.389398242 | 0           |
| ST7-AS1 | FOXJ1    | 0.625786271 | 4.24E-49    |
| ST7-AS1 | ALDH1A1  | 0.525723866 | 0           |
| ST7-AS1 | OCA2     | 0.507719722 | 3.84E-30    |
| ST7-AS1 | TMEM139  | 0.391931453 | 0           |
| ST7-AS1 | ARHGAP24 | 0.50902765  | 0           |
| ST7-AS1 | SLC25A15 | 0.427252728 | 0           |
| ST7-AS1 | DES      | 0.296558545 | 2.31E-10    |
| ST7-AS1 | GDF10    | 0.459752703 | 2.41E-24    |
| ST7-AS1 | KIAA1324 | 0.463490981 | 0           |
| ST7-AS1 | JUN      | 0.443455209 | 0           |
| ST7-AS1 | C7       | 0.128675355 | 0.006975853 |
| ST7-AS1 | LGI3     | 0.614576744 | 0           |
| ST7-AS1 | CDON     | 0.571988301 | 0           |
| ST7-AS1 | BCL2     | 0.531860875 | 0           |
| ST7-AS1 | HLF      | 0.600553448 | 0           |
| ST7-AS1 | EGR1     | 0.390518471 | 0           |
| ST7-AS1 | IP6K3    | 0.509537838 | 0           |
| ST7-AS1 | SCUBE3   | 0.445839066 | 0           |
| ST7-AS1 | PKNOX2   | 0.543377766 | 0           |
| ST7-AS1 | SMAD9    | 0.425347288 | 0           |
| ST7-AS1 | IQGAP2   | 0.446972061 | 0           |
| ST7-AS1 | GNA14    | 0.505970776 | 0           |
| ST7-AS1 | LAYN     | 0.529282134 | 0           |
| ST7-AS1 | AVPR1A   | 0.544734297 | 0           |
| ST7-AS1 | PDLIM3   | 0.448686588 | 0           |
| ST7-AS1 | GPM6A    | 0.581796906 | 0           |
| ST7-AS1 | SDPR     | 0.508319031 | 0           |
| ST7-AS1 | CRYAB    | 0.433481506 | 0           |
| ST7-AS1 | FOXA2    | 0.482445493 | 5.66E-27    |
| ST7-AS1 | C8orf88  | 0.482122848 | 0           |
| ST7-AS1 | ISM1     | 0.373238879 | 4.97E-16    |
| ST7-AS1 | BMP2     | 0.413410559 | 0           |
| ST7-AS1 | ID4      | 0.597520403 | 0           |
| ST7-AS1 | NUPR1    | 0.47473824  | 0           |
| ST7-AS1 | SERTM1   | 0.472120195 | 9.41E-26    |
| ST7-AS1 | IRS1     | 0.492240658 | 0           |
| ST7-AS1 | FIBIN    | 0.261642559 | 2.98E-08    |
| ST7-AS1 | PODN     | 0.260537932 | 3.42E-08    |
| ST7-AS1 | TDRD9    | 0.398331853 | 0           |
| ST7-AS1 | EPHA3    | 0.293431239 | 4.41E-10    |
| ST7-AS1 | AIF1L    | 0.447935135 | 0           |
| ST7-AS1 | EBF4     | 0.606624787 | 0           |
| ST7-AS1 | ADM2     | 0.507150435 | 0           |
| ST7-AS1 | GSTM3    | 0.591370203 | 0           |
| ST7-AS1 | HSD17B6  | 0.418489605 | 0           |
| ST7-AS1 | AGR3     | 0.45218213  | 1.64E-23    |
| ST7-AS1 | EPHB1    | 0.479025976 | 0           |
| ST7-AS1 | TMOD1    | 0.381151405 | 3.25E-17    |

|         |          |             |             |
|---------|----------|-------------|-------------|
| ST7-AS1 | WASF3    | 0.488051924 | 0           |
| ST7-AS1 | SELV     | 0.590906602 | 1.12E-42    |
| ST7-AS1 | ENPP1    | 0.401829841 | 0           |
| ST7-AS1 | SYNE1    | 0.477870233 | 1.99E-26    |
| ST7-AS1 | PLCH1    | 0.494045677 | 0           |
| ST7-AS1 | CCDC146  | 0.609447346 | 0           |
| ST7-AS1 | SLC16A2  | 0.503961369 | 0           |
| ST7-AS1 | IER2     | 0.536658374 | 0           |
| ST7-AS1 | KCNAB1   | 0.517349234 | 0           |
| ST7-AS1 | SYNDIG1  | 0.509866475 | 0           |
| ST7-AS1 | C16orf89 | 0.628042903 | 0           |
| ST7-AS1 | CTGF     | 0.321029908 | 7.30E-12    |
| ST7-AS1 | NR4A3    | 0.280923757 | 2.46E-09    |
| ST7-AS1 | KIAA1456 | 0.587864841 | 0           |
| ST7-AS1 | AQP4     | 0.488295884 | 0           |
| ST7-AS1 | RNF150   | 0.504152991 | 0           |
| ST7-AS1 | C1S      | 0.093135508 | 0.051192701 |
| ST7-AS1 | PFKFB2   | 0.47611945  | 0           |
| ST7-AS1 | PROX1    | 0.480286483 | 0           |
| ST7-AS1 | TCF7L1   | 0.593743706 | 0           |
| ST7-AS1 | HSPB6    | 0.391841386 | 0           |
| ST7-AS1 | FHDC1    | 0.500092336 | 0           |
| ST7-AS1 | PRR15L   | 0.545350153 | 0           |
| ST7-AS1 | SLC1A1   | 0.431533657 | 0           |
| ST7-AS1 | BTBD11   | 0.646615482 | 0           |
| ST7-AS1 | TRIM58   | 0.345870128 | 1.20E-13    |
| ST7-AS1 | LRIG1    | 0.533265204 | 0           |
| ST7-AS1 | ROR2     | 0.386327468 | 0           |
| ST7-AS1 | GPR125   | 0.544579552 | 0           |
| ST7-AS1 | FLRT1    | 0.60744801  | 0           |
| ST7-AS1 | PGF      | 0.550437    | 0           |
| ST7-AS1 | DUSP1    | 0.359767189 | 9.27E-15    |
| ST7-AS1 | PLA2G7   | 0.433540085 | 0           |
| ST7-AS1 | PLSCR4   | 0.428042761 | 0           |
| ST7-AS1 | FAM46B   | 0.506296576 | 0           |
| ST7-AS1 | GLDC     | 0.416091423 | 0           |
| ST7-AS1 | ZBTB16   | 0.398406318 | 0           |
| ST7-AS1 | OMD      | 0.197416173 | 3.11E-05    |
| ST7-AS1 | HSD11B2  | 0.58838822  | 0           |
| ST7-AS1 | FGL2     | 0.180706746 | 0.00014421  |
| ST7-AS1 | CLCNKA   | 0.646042412 | 3.22E-53    |
| ST7-AS1 | GATM     | 0.520113498 | 0           |
| ST7-AS1 | TNS3     | 0.347729188 | 8.64E-14    |
| ST7-AS1 | TOB1     | 0.354968697 | 2.31E-14    |
| ST7-AS1 | MARC2    | 0.632491625 | 0           |
| ST7-AS1 | LRRC2    | 0.513392829 | 0           |
| ST7-AS1 | SORD     | 0.394795003 | 0           |
| ST7-AS1 | RIMS4    | 0.485027105 | 0           |
| ST7-AS1 | SLC29A4  | 0.596248408 | 0           |
| ST7-AS1 | SLC39A14 | 0.417977715 | 0           |
| ST7-AS1 | FAXDC2   | 0.568729877 | 0           |

|         |          |             |             |
|---------|----------|-------------|-------------|
| ST7-AS1 | HSPB8    | 0.330115427 | 1.71E-12    |
| ST7-AS1 | CCL19    | 0.051153907 | 0.284872425 |
| ST7-AS1 | KCNIP3   | 0.571006221 | 0           |
| ST7-AS1 | CGNL1    | 0.418703353 | 0           |
| ST7-AS1 | ATF3     | 0.22084864  | 3.16E-06    |
| ST7-AS1 | SGCD     | 0.313107595 | 2.48E-11    |
| ST7-AS1 | STARD13  | 0.440123739 | 0           |
| ST7-AS1 | LDHD     | 0.65139355  | 0           |
| ST7-AS1 | RCAN1    | 0.377039547 | 1.72E-16    |
| ST7-AS1 | ID3      | 0.418820936 | 0           |
| ST7-AS1 | SYTL3    | 0.60576341  | 0           |
| ST7-AS1 | MT1E     | 0.45475353  | 0           |
| ST7-AS1 | CAMK1D   | 0.467092084 | 0           |
| ST7-AS1 | PRKCQ    | 0.614932471 | 0           |
| ST7-AS1 | NUAK2    | 0.411265556 | 0           |
| ST7-AS1 | LIPG     | 0.451932105 | 0           |
| ST7-AS1 | SLC25A25 | 0.373871189 | 4.23E-16    |
| ST7-AS1 | PRKX     | 0.288227376 | 9.11E-10    |
| ST7-AS1 | SRPX     | 0.198328449 | 2.95E-05    |
| ST7-AS1 | FAM189A1 | 0.539264348 | 0           |
| ST7-AS1 | PLEKHH1  | 0.514396894 | 0           |
| ST7-AS1 | WNT11    | 0.538886068 | 0           |
| ST7-AS1 | SNAI1    | 0.386143789 | 0           |
| ST7-AS1 | FDCSP    | 0.043833361 | 0.359544782 |
| ST7-AS1 | MT1X     | 0.55112491  | 0           |
| ST7-AS1 | ACACB    | 0.555013375 | 0           |
| ST7-AS1 | ARC      | 0.308923967 | 4.65E-11    |
| ST7-AS1 | KLK4     | 0.273642839 | 5.59E-09    |
| ST7-AS1 | ZFPM2    | 0.332477724 | 1.16E-12    |
| ST7-AS1 | AKAP12   | 0.298747436 | 2.07E-10    |
| ST7-AS1 | GJB6     | 0.394216363 | 8.97E-18    |
| ST7-AS1 | ERO1LB   | 0.487625845 | 0           |
| ST7-AS1 | DNALI1   | 0.561344701 | 0           |
| ST7-AS1 | HKDC1    | 0.344275028 | 1.59E-13    |
| ST7-AS1 | ZFP36L2  | 0.428310266 | 0           |
| ST7-AS1 | CAPSL    | 0.541928934 | 7.10E-35    |
| ST7-AS1 | CYP7B1   | 0.317662836 | 1.23E-11    |
| ST7-AS1 | CPQ      | 0.434187855 | 0           |
| ST7-AS1 | RPS6KA6  | 0.51939114  | 1.07E-31    |
| ST7-AS1 | TLE1     | 0.502812347 | 0           |
| ST7-AS1 | TP53INP2 | 0.530402505 | 0           |
| ST7-AS1 | KATNAL2  | 0.61037028  | 0           |
| ST7-AS1 | SGPP2    | 0.168602223 | 0.000395143 |
| ST7-AS1 | CTH      | 0.476903809 | 0           |
| ST7-AS1 | KIF12    | 0.577428606 | 0           |
| ST7-AS1 | TMEM220  | 0.581815345 | 0           |
| ST7-AS1 | CENPJ    | 0.435271207 | 0           |
| ST7-AS1 | FAM155B  | 0.403469194 | 0           |
| ST7-AS1 | WFS1     | 0.540239052 | 0           |
| ST7-AS1 | SELENBP1 | 0.642745882 | 0           |
| ST7-AS1 | SNTA1    | 0.635117313 | 0           |

|         |          |             |             |
|---------|----------|-------------|-------------|
| ST7-AS1 | FRAS1    | 0.247438421 | 1.66E-07    |
| ST7-AS1 | FBLN7    | 0.493679879 | 0           |
| ST7-AS1 | AGPAT9   | 0.495944593 | 0           |
| ST7-AS1 | GPR83    | 0.502333079 | 0           |
| ST7-AS1 | PRTG     | 0.437032115 | 0           |
| ST7-AS1 | EGR3     | 0.214280021 | 6.22E-06    |
| ST7-AS1 | GRAMD2   | 0.45945231  | 0           |
| ST7-AS1 | HYOU1    | 0.326593611 | 3.02E-12    |
| ST7-AS1 | FBLN5    | 0.306765489 | 6.41E-11    |
| ST7-AS1 | ITM2A    | 0.432301988 | 0           |
| ST7-AS1 | SRF      | 0.5028149   | 0           |
| ST7-AS1 | FGFR2    | 0.457947134 | 0           |
| ST7-AS1 | MT1A     | 0.424887964 | 1.14E-20    |
| ST7-AS1 | MAMDC2   | 0.225293674 | 1.98E-06    |
| ST7-AS1 | FHL2     | 0.398434118 | 0           |
| ST7-AS1 | FTCDNL1  | 0.574251738 | 0           |
| ST7-AS1 | PKIA     | 0.376083848 | 2.30E-16    |
| ST7-AS1 | DNAJB4   | 0.365219408 | 3.09E-15    |
| ST7-AS1 | SLC25A33 | 0.636216835 | 0           |
| ST7-AS1 | EYA2     | 0.398021372 | 0           |
| ST7-AS1 | LPAR1    | 0.222724861 | 2.60E-06    |
| ST7-AS1 | STX11    | 0.285022992 | 1.41E-09    |
| ST7-AS1 | ARHGEF28 | 0.468233731 | 0           |
| ST7-AS1 | OR2W3    | 0.466299214 | 0           |
| ST7-AS1 | ALDH1B1  | 0.390723865 | 1.84E-17    |
| ST7-AS1 | CXCL12   | 0.196659026 | 3.45E-05    |
| ST7-AS1 | OLFM2    | 0.465182388 | 0           |
| ST7-AS1 | TUB      | 0.45796146  | 0           |
| ST7-AS1 | HTRA3    | 0.317396466 | 1.28E-11    |
| ST7-AS1 | CKB      | 0.598483477 | 0           |
| ST7-AS1 | RGS2     | 0.22556203  | 1.92E-06    |
| ST7-AS1 | SHANK2   | 0.49725999  | 0           |
| ST7-AS1 | CNTFR    | 0.448190505 | 4.44E-23    |
| ST7-AS1 | CYTH3    | 0.476959551 | 0           |
| ST7-AS1 | PLAC9    | 0.470685527 | 0           |
| ST7-AS1 | WVOX     | 0.629007537 | 0           |
| ST7-AS1 | NPR3     | 0.337083602 | 5.42E-13    |
| ST7-AS1 | SDC2     | 0.376866222 | 1.82E-16    |
| ST7-AS1 | KLF15    | 0.574564915 | 0           |
| ST7-AS1 | TMEM164  | 0.440921998 | 0           |
| ST7-AS1 | LONRF3   | 0.258152515 | 4.58E-08    |
| ST7-AS1 | GBP1     | 0.162967318 | 0.00061789  |
| ST7-AS1 | ARHGAP6  | 0.441230919 | 0           |
| ST7-AS1 | TMEM119  | 0.156254876 | 0.001033467 |
| ST7-AS1 | SH3RF1   | 0.38970461  | 0           |
| ST7-AS1 | CRELD2   | 0.548234837 | 0           |
| ST7-AS1 | PCP4     | 0.281305299 | 2.34E-09    |
| ST7-AS1 | GCSH     | 0.645614963 | 0           |
| ST7-AS1 | IMPA2    | 0.548966007 | 0           |
| ST7-AS1 | C1R      | 0.111226976 | 0.01979191  |
| ST7-AS1 | SUCNR1   | 0.28912946  | 8.04E-10    |

|         |          |             |             |
|---------|----------|-------------|-------------|
| ST7-AS1 | SFRP1    | 0.308926378 | 4.65E-11    |
| ST7-AS1 | UGT8     | 0.413968972 | 0           |
| ST7-AS1 | TLE4     | 0.247904073 | 1.57E-07    |
| ST7-AS1 | ANTXR1   | 0.230742064 | 1.10E-06    |
| ST7-AS1 | GPX3     | 0.441206807 | 0           |
| ST7-AS1 | DPY19L2  | 0.593417055 | 0           |
| ST7-AS1 | FAM46C   | 0.374836816 | 3.27E-16    |
| ST7-AS1 | IL33     | 0.182331497 | 0.000122221 |
| ST7-AS1 | PEG3     | 0.427279677 | 0           |
| ST7-AS1 | FAHD2A   | 0.731075523 | 0           |
| ST7-AS1 | PTGDS    | 0.185242981 | 9.72E-05    |
| ST7-AS1 | CHCHD10  | 0.577966311 | 0           |
| ST7-AS1 | CD36     | 0.466266024 | 0           |
| ST7-AS1 | ANKRD37  | 0.606625638 | 0           |
| ST7-AS1 | TSPAN33  | 0.495624608 | 0           |
| ST7-AS1 | PRDM16   | 0.498364192 | 0           |
| ST7-AS1 | UST      | 0.49764905  | 0           |
| ST7-AS1 | NEXN     | 0.416395096 | 0           |
| ST7-AS1 | NUPR1L   | 0.392525181 | 1.27E-17    |
| ST7-AS1 | SLC24A3  | 0.434237498 | 0           |
| ST7-AS1 | MARC1    | 0.501443335 | 0           |
| ST7-AS1 | MYH11    | 0.25400463  | 7.59E-08    |
| ST7-AS1 | APOA1    | 0.601899859 | 1.29E-44    |
| ST7-AS1 | TMEM178B | 0.256568619 | 5.56E-08    |
| ST7-AS1 | CAPN6    | 0.200793154 | 2.25E-05    |
| ST7-AS1 | PPM1L    | 0.421763631 | 0           |
| ST7-AS1 | FZD8     | 0.560259789 | 0           |
| ST7-AS1 | RCAN2    | 0.463183336 | 0           |
| ST7-AS1 | COPZ2    | 0.582549352 | 0           |
| ST7-AS1 | GAS1     | 0.265540669 | 1.83E-08    |
| ST7-AS1 | DACT1    | 0.383346619 | 1.25E-18    |
| ST7-AS1 | WBSCR17  | 0.480244641 | 0           |
| ST7-AS1 | NCS1     | 0.446639169 | 0           |
| ST7-AS1 | SPIRE2   | 0.564889069 | 0           |
| ST7-AS1 | C15orf52 | 0.312094736 | 2.89E-11    |
| ST7-AS1 | SPAG5    | 0.491239004 | 0           |
| ST7-AS1 | ARL4D    | 0.448496243 | 0           |
| ST7-AS1 | FAM189A2 | 0.531211686 | 0           |
| ST7-AS1 | MAP1LC3A | 0.66558861  | 0           |
| ST7-AS1 | KLF6     | 0.174074158 | 0.000252567 |
| ST7-AS1 | ADD3     | 0.321473432 | 6.81E-12    |
| ST7-AS1 | TSPAN7   | 0.449130822 | 0           |
| ST7-AS1 | KLF9     | 0.440150688 | 0           |
| ST7-AS1 | KCNQ1    | 0.603200839 | 0           |
| ST7-AS1 | MAN1A1   | 0.080548881 | 0.091863956 |
| ST7-AS1 | MLF1     | 0.457638639 | 0           |
| ST7-AS1 | RARB     | 0.516867272 | 0           |
| ST7-AS1 | CDC42EP2 | 0.514182295 | 0           |
| ST7-AS1 | FAM3B    | 0.308882834 | 4.68E-11    |
| ST7-AS1 | GADD45B  | 0.415468758 | 0           |
| ST7-AS1 | TMEM47   | 0.333672986 | 9.55E-13    |

|         |          |              |             |
|---------|----------|--------------|-------------|
| ST7-AS1 | SDF2L1   | 0.475554654  | 0           |
| ST7-AS1 | CCDC85A  | 0.252415061  | 9.19E-08    |
| ST7-AS1 | CRYBG3   | 0.024326486  | 0.611096779 |
| ST7-AS1 | FBLN2    | 0.089261227  | 0.061692765 |
| ST7-AS1 | PEBP4    | 0.420266966  | 0           |
| ST7-AS1 | CDADC1   | 0.611710357  | 0           |
| ST7-AS1 | FAM63A   | 0.431431676  | 0           |
| ST7-AS1 | GLUL     | 0.388070788  | 0           |
| ST7-AS1 | FREM2    | 0.394205811  | 0           |
| ST7-AS1 | ACKR3    | 0.455168829  | 0           |
| ST7-AS1 | DENND6A  | 0.523864948  | 0           |
| ST7-AS1 | CLDN8    | 0.192696664  | 4.98E-05    |
| ST7-AS1 | UTS2R    | 0.163387473  | 0.000588828 |
| ST7-AS1 | SCNN1B   | 0.572623022  | 0           |
| ST7-AS1 | TTC30A   | 0.439819214  | 0           |
| ST7-AS1 | CORO2B   | 0.477878372  | 0           |
| ST7-AS1 | TC2N     | 0.239692554  | 4.05E-07    |
| ST7-AS1 | ALDH2    | 0.567754179  | 0           |
| ST7-AS1 | GPR183   | 0.142484618  | 0.002792504 |
| ST7-AS1 | C4orf47  | 0.614243143  | 0           |
| ST7-AS1 | SLC25A42 | 0.601566733  | 0           |
| ST7-AS1 | LGMN     | 0.492001662  | 0           |
| ST7-AS1 | ACSF2    | 0.621969153  | 0           |
| ST7-AS1 | KIAA1467 | 0.45733071   | 0           |
| ST7-AS1 | PRKG1    | 0.482792887  | 0           |
| ST7-AS1 | GNAI1    | 0.468383227  | 0           |
| ST7-AS1 | ABCC4    | 0.22772845   | 1.52E-06    |
| ST7-AS1 | PRPS1    | 0.496177631  | 0           |
| ST7-AS1 | TSPAN5   | 0.356333028  | 1.79E-14    |
| ST7-AS1 | CR2      | 0.104985306  | 0.027842651 |
| ST7-AS1 | CCDC170  | 0.401767007  | 0           |
| ST7-AS1 | RRAD     | 0.215447624  | 5.52E-06    |
| ST7-AS1 | SCGB2A1  | 0.516698344  | 0           |
| ST7-AS1 | SESN3    | 0.206485077  | 1.35E-05    |
| ST7-AS1 | SGK223   | 0.201165759  | 2.26E-05    |
| ST7-AS1 | NDRG2    | 0.608125991  | 0           |
| ST7-AS1 | C3orf52  | 0.255378464  | 6.43E-08    |
| ST7-AS1 | FLRT3    | -0.361867796 | 6.12E-15    |
| ST7-AS1 | MST1R    | -0.533254425 | 0           |
| ST7-AS1 | SDC1     | -0.380470445 | 4.68E-17    |
| ST7-AS1 | ST8SIA4  | -0.549070967 | 0           |
| ST7-AS1 | UBTD1    | -0.207689984 | 1.20E-05    |
| ST7-AS1 | EPHA2    | -0.442550288 | 0           |
| ST7-AS1 | TMEM130  | -0.309846759 | 4.05E-11    |
| ST7-AS1 | SPINK2   | -0.361174213 | 7.03E-15    |
| ST7-AS1 | MMP16    | -0.555575901 | 0           |
| ST7-AS1 | SIGLEC15 | -0.449539029 | 0           |
| ST7-AS1 | RIN1     | -0.417870628 | 0           |
| ST7-AS1 | IL1RN    | -0.462778391 | 0           |
| ST7-AS1 | FCER1G   | -0.314783684 | 1.92E-11    |
| ST7-AS1 | CD276    | -0.548554821 | 0           |

|         |          |              |             |
|---------|----------|--------------|-------------|
| ST7-AS1 | CTSB     | -0.392896513 | 0           |
| ST7-AS1 | FAM171A2 | -0.242756378 | 2.86E-07    |
| ST7-AS1 | ASPHD1   | -0.468462088 | 0           |
| ST7-AS1 | C15orf48 | -0.286748015 | 1.12E-09    |
| ST7-AS1 | DYSF     | -0.340072536 | 3.27E-13    |
| ST7-AS1 | PDZRN4   | -0.158573204 | 0.000867183 |
| ST7-AS1 | EFHD2    | -0.260395102 | 3.48E-08    |
| ST7-AS1 | ASF1B    | -0.414288389 | 0           |
| ST7-AS1 | AQP1     | -0.193240042 | 4.74E-05    |
| ST7-AS1 | ARRDC2   | -0.283104786 | 1.83E-09    |
| ST7-AS1 | PRSS1    | -0.341477986 | 1.89E-13    |
| ST7-AS1 | MAPK13   | -0.628055668 | 0           |
| ST7-AS1 | CST5     | -0.472961047 | 7.51E-26    |
| ST7-AS1 | AHR      | -0.555851065 | 0           |
| ST7-AS1 | BAX      | -0.330284922 | 1.67E-12    |
| ST7-AS1 | C1orf115 | -0.220202997 | 3.38E-06    |
| ST7-AS1 | PLK3     | -0.355357614 | 2.15E-14    |
| ST7-AS1 | JAG2     | -0.294990738 | 3.54E-10    |
| ST7-AS1 | RAD23B   | -0.524798095 | 0           |
| ST7-AS1 | CA12     | -0.062424507 | 0.191650441 |
| ST7-AS1 | ADTRP    | -0.279088384 | 3.15E-09    |
| ST7-AS1 | UCP2     | -0.264243852 | 2.15E-08    |
| ST7-AS1 | IGFBP2   | -0.152691501 | 0.001347158 |
| ST7-AS1 | LOXL2    | -0.342530857 | 2.14E-13    |
| ST7-AS1 | GPX1     | -0.308749649 | 4.77E-11    |
| ST7-AS1 | P3H3     | -0.326842819 | 2.90E-12    |
| ST7-AS1 | C2orf81  | -0.250001986 | 1.23E-07    |
| ST7-AS1 | CDT1     | -0.372802588 | 5.55E-16    |
| ST7-AS1 | SNX25    | -0.369387292 | 1.25E-15    |
| ST7-AS1 | MTHFD1L  | -0.521446909 | 0           |
| ST7-AS1 | CDC42BPG | -0.568697984 | 5.62E-39    |
| ST7-AS1 | MSN      | -0.609135304 | 0           |
| ST7-AS1 | SIGLEC6  | -0.433435805 | 1.56E-21    |
| ST7-AS1 | F2R      | -0.372449556 | 6.06E-16    |
| ST7-AS1 | TMEM184A | -0.489340514 | 0           |
| ST7-AS1 | CKS2     | -0.293248269 | 4.52E-10    |
| ST7-AS1 | TAX1BP3  | -0.406988174 | 0           |
| ST7-AS1 | PMEPA1   | -0.465047359 | 0           |
| ST7-AS1 | CXCL16   | -0.531432527 | 0           |
| ST7-AS1 | FAXC     | -0.584955052 | 0           |
| ST7-AS1 | VTCN1    | -0.488799491 | 9.57E-28    |
| ST7-AS1 | SH2D4A   | -0.560256527 | 0           |
| ST7-AS1 | RNF24    | -0.559078995 | 0           |
| ST7-AS1 | LY6G6C   | -0.375337564 | 3.91E-16    |
| ST7-AS1 | NID1     | -0.510614665 | 0           |
| ST7-AS1 | STAC     | -0.604170721 | 0           |
| ST7-AS1 | RAB34    | -0.340607545 | 2.98E-13    |
| ST7-AS1 | HES4     | -0.141335737 | 0.003022821 |
| ST7-AS1 | EPHA10   | -0.489927011 | 0           |
| ST7-AS1 | ENTPD2   | -0.371262237 | 8.08E-16    |
| ST7-AS1 | DDB2     | -0.400094605 | 0           |



|         |          |              |             |
|---------|----------|--------------|-------------|
| ST7-AS1 | NKAIN4   | -0.272486291 | 7.50E-09    |
| ST7-AS1 | TRIM29   | -0.428403878 | 0           |
| ST7-AS1 | ADCY8    | -0.491536424 | 4.40E-28    |
| ST7-AS1 | SFTA2    | -0.297878968 | 2.34E-10    |
| ST7-AS1 | NRIP1    | -0.580916381 | 0           |
| ST7-AS1 | VWA1     | -0.107828133 | 0.023899622 |
| ST7-AS1 | APLNR    | -0.237940298 | 4.94E-07    |
| ST7-AS1 | REN      | -0.359967434 | 7.08E-15    |
| ST7-AS1 | EDIL3    | -0.37805198  | 1.24E-16    |
| ST7-AS1 | AGR      | -0.452545977 | 0           |
| ST7-AS1 | TREM1    | -0.454312842 | 0           |
| ST7-AS1 | SRL      | -0.463644732 | 0           |
| ST7-AS1 | RASGRF1  | -0.484628259 | 0           |
| ST7-AS1 | RMI2     | -0.392384339 | 0           |
| ST7-AS1 | SAMD1    | -0.306919241 | 6.27E-11    |
| ST7-AS1 | MGAT4B   | -0.52053518  | 0           |
| ST7-AS1 | NXN      | -0.47193341  | 0           |
| ST7-AS1 | SH3BGRL3 | -0.371839089 | 7.04E-16    |
| ST7-AS1 | CA11     | -0.195231719 | 3.94E-05    |
| ST7-AS1 | PLD3     | -0.30501068  | 8.31E-11    |
| ST7-AS1 | LURAP1L  | -0.44589963  | 0           |
| ST7-AS1 | CARNS1   | -0.231721023 | 9.87E-07    |
| ST7-AS1 | PDLIM7   | -0.332684665 | 1.12E-12    |
| ST7-AS1 | BCL2L1   | -0.526640559 | 0           |
| ST7-AS1 | GGT6     | -0.251922177 | 9.75E-08    |
| ST7-AS1 | DPYSL3   | -0.418348619 | 0           |
| ST7-AS1 | FYN      | -0.462278557 | 0           |
| ST7-AS1 | TK1      | -0.329493329 | 1.89E-12    |
| ST7-AS1 | AK1      | -0.174884474 | 0.000236102 |
| ST7-AS1 | HIGD1B   | -0.094826491 | 0.047101811 |
| ST7-AS1 | TMEM59L  | -0.350039573 | 5.71E-14    |
| ST7-AS1 | MEGF9    | -0.512185228 | 0           |
| ST7-AS1 | ZFP36L1  | -0.412307208 | 0           |
| ST7-AS1 | ADRA1B   | -0.378767123 | 9.60E-17    |
| ST7-AS1 | EPHA4    | -0.559850589 | 0           |
| ST7-AS1 | TCERG1L  | -0.192422351 | 5.11E-05    |
| ST7-AS1 | NGFR     | -0.198199519 | 2.99E-05    |
| ST7-AS1 | EBI3     | -0.449076073 | 0           |
| ST7-AS1 | S100A10  | -0.414869779 | 0           |
| ST7-AS1 | S100B    | -0.27818474  | 3.55E-09    |
| ST7-AS1 | CD44     | -0.349750225 | 6.02E-14    |
| ST7-AS1 | BHLHE41  | -0.400593305 | 0           |
| ST7-AS1 | FBXO2    | -0.264460721 | 2.09E-08    |
| ST7-AS1 | SLC30A2  | -0.273530071 | 6.55E-09    |
| ST7-AS1 | FRMD5    | -0.486850989 | 0           |
| ST7-AS1 | SAMD11   | -0.223624251 | 2.36E-06    |
| ST7-AS1 | SIP1L2   | -0.522292542 | 0           |
| ST7-AS1 | S100A16  | -0.415876965 | 0           |
| ST7-AS1 | PPL      | -0.582153768 | 0           |
| ST7-AS1 | ARHGD1B  | -0.251492978 | 1.03E-07    |
| ST7-AS1 | CDC42EP3 | -0.528927683 | 0           |

|         |          |              |             |
|---------|----------|--------------|-------------|
| ST7-AS1 | RUNX2    | -0.455592638 | 0           |
| ST7-AS1 | LAMC2    | -0.557919334 | 0           |
| ST7-AS1 | BRINP1   | -0.424019409 | 0           |
| ST7-AS1 | GPRC5B   | -0.520300723 | 0           |
| ST7-AS1 | AQP5     | -0.140514216 | 0.003197966 |
| ST7-AS1 | PLAG1    | -0.430563065 | 0           |
| ST7-AS1 | PTPRU    | -0.481311965 | 0           |
| ST7-AS1 | ANGPTL4  | -0.354868134 | 2.36E-14    |
| ST7-AS1 | PALM3    | -0.233814256 | 7.84E-07    |
| ST7-AS1 | ACP5     | -0.309783783 | 4.09E-11    |
| ST7-AS1 | DLG4     | -0.311592491 | 3.12E-11    |
| ST7-AS1 | ETNK2    | -0.307841749 | 5.47E-11    |
| ST7-AS1 | CD109    | -0.571780368 | 0           |
| ST7-AS1 | SNX22    | -0.191035326 | 5.79E-05    |
| ST7-AS1 | TMEM98   | -0.379500705 | 7.22E-17    |
| ST7-AS1 | CTHRC1   | -0.33844226  | 4.31E-13    |
| ST7-AS1 | S100A2   | -0.305151525 | 8.14E-11    |
| ST7-AS1 | C11orf80 | -0.448546879 | 0           |
| ST7-AS1 | SREBF1   | -0.403095454 | 0           |
| ST7-AS1 | PRSS22   | -0.422151698 | 0           |
| ST7-AS1 | CMTM3    | -0.472044327 | 0           |
| ST7-AS1 | RDH5     | -0.357928837 | 1.32E-14    |
| ST7-AS1 | MYH10    | -0.616295101 | 0           |
| ST7-AS1 | EVPL     | -0.496569385 | 0           |
| ST7-AS1 | SCD      | -0.51330645  | 0           |
| ST7-AS1 | CD151    | -0.384855908 | 0           |
| ST7-AS1 | S100A4   | -0.336574974 | 5.90E-13    |
| ST7-AS1 | BNIP1    | -0.289780493 | 7.34E-10    |
| ST7-AS1 | MAP3K6   | -0.405202728 | 0           |
| ST7-AS1 | MANEAL   | -0.468008919 | 0           |
| ST7-AS1 | CD207    | -0.311756534 | 2.38E-11    |
| ST7-AS1 | CD1A     | -0.334111022 | 6.57E-13    |
| ST7-AS1 | C3       | -0.392855096 | 0           |
| ST7-AS1 | NT5E     | -0.477459669 | 0           |
| ST7-AS1 | CACNG4   | -0.499589878 | 4.29E-29    |
| ST7-AS1 | FHOD1    | -0.333778938 | 9.39E-13    |
| ST7-AS1 | LEMD1    | -0.454838206 | 0           |
| ST7-AS1 | ATP11A   | -0.463955781 | 0           |
| ST7-AS1 | PPAP2C   | -0.34495613  | 1.41E-13    |
| ST7-AS1 | DRAM1    | -0.578034393 | 0           |
| ST7-AS1 | CDA      | -0.236744185 | 5.66E-07    |
| ST7-AS1 | CCND2    | -0.403403666 | 0           |
| ST7-AS1 | LCN6     | -0.147480765 | 0.001946912 |
| ST7-AS1 | CDH4     | -0.396117918 | 0           |
| ST7-AS1 | MMP11    | -0.435888907 | 0           |
| ST7-AS1 | B3GAT1   | -0.387847536 | 0           |
| ST7-AS1 | SPP1     | -0.301603894 | 1.37E-10    |
| ST7-AS1 | HLA-DQB1 | -0.285639274 | 1.30E-09    |
| ST7-AS1 | SDC3     | -0.558281445 | 0           |
| ST7-AS1 | CX3CL1   | -0.408007841 | 0           |
| ST7-AS1 | SDK1     | -0.438096461 | 0           |

|         |          |              |             |
|---------|----------|--------------|-------------|
| ST7-AS1 | DOCK9    | -0.616955069 | 0           |
| ST7-AS1 | CSF2     | -0.510236379 | 1.80E-30    |
| ST7-AS1 | GRHL3    | -0.621723491 | 0           |
| ST7-AS1 | TMEM92   | -0.526915226 | 9.88E-33    |
| ST7-AS1 | BASP1    | -0.451036404 | 0           |
| ST7-AS1 | HRH1     | -0.604430425 | 0           |
| ST7-AS1 | ESM1     | -0.135532187 | 0.004472492 |
| ST7-AS1 | B4GALNT3 | -0.434320756 | 0           |
| ST7-AS1 | LMO3     | -0.306669466 | 6.51E-11    |
| ST7-AS1 | C9orf16  | -0.331743434 | 1.31E-12    |
| ST7-AS1 | SEMA3F   | -0.326426527 | 3.10E-12    |
| ST7-AS1 | PLA2G12B | -0.275066115 | 4.62E-09    |
| ST7-AS1 | KLK6     | -0.392877948 | 1.18E-17    |
| ST7-AS1 | ST3GAL5  | -0.377153726 | 1.66E-16    |
| ST7-AS1 | FAM132B  | -0.20825024  | 1.14E-05    |
| ST7-AS1 | CDKN1A   | -0.299785259 | 1.78E-10    |
| ST7-AS1 | E2F1     | -0.382738279 | 8.00E-18    |
| ST7-AS1 | B3GNT8   | -0.355050253 | 2.28E-14    |
| ST7-AS1 | MTMR11   | -0.58092631  | 0           |
| ST7-AS1 | MYO1G    | -0.415861505 | 0           |
| ST7-AS1 | TMSB10   | -0.334542022 | 8.27E-13    |
| ST7-AS1 | UNC5CL   | -0.483007061 | 0           |
| ST7-AS1 | ABR      | -0.634368413 | 0           |
| ST7-AS1 | PLP2     | -0.462327065 | 0           |
| ST7-AS1 | SRCIN1   | -0.406956402 | 0           |
| ST7-AS1 | PDE9A    | -0.399310955 | 0           |
| ST7-AS1 | TREM2    | -0.300532882 | 1.60E-10    |
| ST7-AS1 | KDEL3    | -0.540245293 | 0           |
| ST7-AS1 | PC       | -0.410232414 | 0           |
| ST7-AS1 | C2CD4A   | -0.47544161  | 0           |
| ST7-AS1 | PELI1    | -0.488673454 | 0           |
| ST7-AS1 | SSX1     | -0.348221079 | 7.91E-14    |
| ST7-AS1 | MROH6    | -0.44614898  | 0           |
| ST7-AS1 | ESPN     | -0.361188964 | 7.01E-15    |
| ST7-AS1 | BMP1     | -0.399798449 | 0           |
| ST7-AS1 | TM4SF4   | -0.454966892 | 8.16E-24    |
| ST7-AS1 | CORO2A   | -0.582785653 | 0           |
| ST7-AS1 | CD164L2  | -0.298636459 | 1.71E-10    |
| ST7-AS1 | CTSS     | -0.483956377 | 0           |
| ST7-AS1 | CLU      | -0.371816537 | 7.08E-16    |
| ST7-AS1 | TMSB4X   | -0.425409413 | 0           |
| ST7-AS1 | WNT10A   | -0.389013381 | 2.60E-17    |
| ST7-AS1 | NAPSA    | -0.363597217 | 4.32E-15    |
| ST7-AS1 | PLEKHA4  | -0.332417018 | 1.18E-12    |
| ST7-AS1 | SFTPA1   | -0.185923604 | 8.90E-05    |
| ST7-AS1 | C1orf116 | -0.491069083 | 0           |
| ST7-AS1 | TM4SF1   | -0.383619372 | 0           |
| ST7-AS1 | SEL1L3   | -0.535624523 | 0           |
| ST7-AS1 | VASN     | -0.417567096 | 0           |
| ST7-AS1 | NPTXR    | -0.546573782 | 0           |
| ST7-AS1 | PDE4C    | -0.458870352 | 0           |

|         |          |              |             |
|---------|----------|--------------|-------------|
| ST7-AS1 | CDC42EP1 | -0.436831273 | 0           |
| ST7-AS1 | ENDOD1   | -0.556511743 | 0           |
| ST7-AS1 | RYR1     | -0.471118414 | 0           |
| ST7-AS1 | IL1RAP   | -0.621500523 | 0           |
| ST7-AS1 | SLC35F2  | -0.562909468 | 4.66E-38    |
| ST7-AS1 | ISYNA1   | -0.288329215 | 8.98E-10    |
| ST7-AS1 | HLA-G    | -0.430312439 | 0           |
| ST7-AS1 | CDKN2B   | -0.540187282 | 0           |
| ST7-AS1 | ALDH1A3  | -0.558153366 | 0           |
| ST7-AS1 | CLIP3    | -0.493214795 | 0           |
| ST7-AS1 | ULBP2    | -0.528220625 | 0           |
| ST7-AS1 | ETHE1    | -0.445511564 | 0           |
| ST7-AS1 | XPR1     | -0.660619346 | 0           |
| ST7-AS1 | SPTBN2   | -0.613912379 | 0           |
| ST7-AS1 | IVL      | -0.533472297 | 1.18E-33    |
| ST7-AS1 | MARCO    | -0.379596303 | 6.94E-17    |
| ST7-AS1 | PLXND1   | -0.37833835  | 1.12E-16    |
| ST7-AS1 | EMILIN2  | -0.485106108 | 0           |
| ST7-AS1 | PLAUR    | -0.454520633 | 0           |
| ST7-AS1 | CDC42EP5 | -0.356122825 | 1.86E-14    |
| ST7-AS1 | TRPC5    | -0.357207317 | 1.17E-14    |
| ST7-AS1 | TMEM100  | -0.405866667 | 0           |
| ST7-AS1 | QSOX1    | -0.54482876  | 0           |
| ST7-AS1 | ARHGAP23 | -0.518538113 | 0           |
| ST7-AS1 | MDFI     | -0.379192777 | 8.16E-17    |
| ST7-AS1 | FSTL3    | -0.386581924 | 0           |
| ST7-AS1 | INF2     | -0.377243509 | 1.62E-16    |
| ST7-AS1 | TGFBR1   | -0.531431534 | 0           |
| ST7-AS1 | TGFBI    | -0.342073432 | 2.32E-13    |
| ST7-AS1 | ERBB3    | -0.511899001 | 0           |
| ST7-AS1 | CCL18    | -0.36039269  | 8.20E-15    |
| ST7-AS1 | CCL17    | -0.332404619 | 8.74E-13    |
| ST7-AS1 | C16orf45 | -0.415038424 | 0           |
| ST7-AS1 | PRDM1    | -0.35640111  | 1.77E-14    |
| ST7-AS1 | TRIM47   | -0.485746929 | 0           |
| ST7-AS1 | CNFN     | -0.289986157 | 7.14E-10    |
| ST7-AS1 | ARMCX3   | -0.35379542  | 2.88E-14    |
| ST7-AS1 | RAMP1    | -0.23313287  | 8.45E-07    |
| ST7-AS1 | GABRD    | -0.129720552 | 0.006527173 |
| ST7-AS1 | COL13A1  | -0.197572316 | 3.17E-05    |
| ST7-AS1 | S100A5   | -0.346919014 | 9.97E-14    |
| ST7-AS1 | MISP     | -0.421758383 | 0           |
| ST7-AS1 | HES6     | -0.263994077 | 2.22E-08    |
| ST7-AS1 | PSD3     | -0.633512426 | 0           |
| ST7-AS1 | DOK7     | -0.42608243  | 0           |
| ST7-AS1 | ZMAT3    | -0.662272883 | 0           |
| ST7-AS1 | MFAP2    | -0.327876386 | 2.46E-12    |
| ST7-AS1 | TMEM79   | -0.487973346 | 0           |
| ST7-AS1 | SLC1A5   | -0.329687646 | 1.84E-12    |
| ST7-AS1 | BBC3     | -0.432725372 | 0           |
| ST7-AS1 | HLA-DQB2 | -0.287289407 | 1.04E-09    |

|         |           |              |          |
|---------|-----------|--------------|----------|
| ST7-AS1 | C1QL1     | -0.326149519 | 3.25E-12 |
| ST7-AS1 | TMEM215   | -0.320278617 | 6.27E-12 |
| ST7-AS1 | PNP       | -0.413535376 | 0        |
| ST7-AS1 | ARNTL     | -0.49868361  | 0        |
| ST7-AS1 | CLDN2     | -0.289512644 | 6.35E-10 |
| ST7-AS1 | MVP       | -0.501177106 | 0        |
| ST7-AS1 | LGALS1    | -0.392054142 | 0        |
| ST7-AS1 | BIRC7     | -0.378793915 | 1.99E-16 |
| ST7-AS1 | COL8A1    | -0.617573621 | 0        |
| ST7-AS1 | PERP      | -0.54793088  | 0        |
| ST7-AS1 | GJA4      | -0.301419932 | 1.41E-10 |
| ST7-AS1 | IGFL2     | -0.45510498  | 7.88E-24 |
| ST7-AS1 | DAPK2     | -0.376230934 | 2.20E-16 |
| ST7-AS1 | MAMLD1    | -0.59685618  | 0        |
| ST7-AS1 | ETV5      | -0.441591328 | 0        |
| ST7-AS1 | RUNX1     | -0.631904419 | 0        |
| ST7-AS1 | LONRF2    | -0.354879765 | 2.35E-14 |
| ST7-AS1 | SPOCK1    | -0.26383139  | 2.27E-08 |
| ST7-AS1 | XKRX      | -0.45069869  | 0        |
| ST7-AS1 | TGFB1     | -0.354629138 | 2.47E-14 |
| ST7-AS1 | ERP27     | -0.237640312 | 5.11E-07 |
| ST7-AS1 | TNFRSF10C | -0.559461104 | 0        |
| ST7-AS1 | PALM      | -0.382409359 | 1.22E-17 |
| ST7-AS1 | TSC22D1   | -0.352759583 | 3.48E-14 |
| ST7-AS1 | TGM2      | -0.55015829  | 0        |
| ST7-AS1 | UBE2QL1   | -0.248583473 | 1.45E-07 |
| ST7-AS1 | ECE1      | -0.569151133 | 0        |
| ST7-AS1 | COL8A2    | -0.521618957 | 0        |
| ST7-AS1 | HIST3H2A  | -0.366302051 | 2.46E-15 |
| ST7-AS1 | TNFRSF21  | -0.567150095 | 0        |
| ST7-AS1 | SOX4      | -0.536653835 | 0        |
| ST7-AS1 | ELF3      | -0.446608674 | 0        |
| ST7-AS1 | TPD52L1   | -0.407127174 | 0        |
| ST7-AS1 | INHBB     | -0.406343382 | 0        |
| ST7-AS1 | HPN       | -0.270630778 | 9.54E-09 |
| ST7-AS1 | MMP7      | -0.409694956 | 3.38E-19 |
| ST7-AS1 | RAB27A    | -0.563440061 | 0        |
| ST7-AS1 | IGF2BP2   | -0.52713245  | 0        |
| ST7-AS1 | ITGB4     | -0.527796532 | 0        |
| ST7-AS1 | PPP1R1B   | -0.374973122 | 3.15E-16 |
| ST7-AS1 | NPDC1     | -0.239395689 | 4.19E-07 |
| ST7-AS1 | CCL13     | -0.470258268 | 1.55E-25 |
| ST7-AS1 | SPINT1    | -0.513971667 | 0        |
| ST7-AS1 | HEY2      | -0.369920741 | 1.11E-15 |
| ST7-AS1 | CST2      | -0.476827327 | 2.64E-26 |
| ST7-AS1 | ADM       | -0.353194456 | 3.22E-14 |
| ST7-AS1 | VSTM2L    | -0.389611707 | 0        |
| ST7-AS1 | FAM84A    | -0.57489809  | 0        |
| ST7-AS1 | P4HA2     | -0.512431599 | 0        |
| ST7-AS1 | LPL       | -0.462798248 | 0        |
| ST7-AS1 | TMEM173   | -0.450486076 | 0        |

|         |            |              |             |
|---------|------------|--------------|-------------|
| ST7-AS1 | DHRS3      | -0.320072082 | 8.48E-12    |
| ST7-AS1 | SCN1B      | -0.408065143 | 0           |
| ST7-AS1 | GLT1D1     | -0.370853321 | 8.90E-16    |
| ST7-AS1 | PHYHIP     | -0.391106103 | 0           |
| ST7-AS1 | BHLHE40    | -0.467817864 | 0           |
| ST7-AS1 | BID        | -0.426925794 | 0           |
| ST7-AS1 | POSTN      | -0.381990514 | 1.82E-17    |
| ST7-AS1 | ITGA3      | -0.631609681 | 0           |
| ST7-AS1 | RSP04      | -0.474404213 | 0           |
| ST7-AS1 | ADAMTS9    | -0.31255599  | 2.69E-11    |
| ST7-AS1 | ABTB2      | -0.625279916 | 0           |
| ST7-AS1 | KCNQ3      | -0.662425784 | 0           |
| ST7-AS1 | ANXA1      | -0.42203454  | 0           |
| ST7-AS1 | S100A11    | -0.495925445 | 0           |
| ST7-AS1 | CEACAM6    | -0.524423323 | 2.19E-32    |
| ST7-AS1 | IER5L      | -0.391710471 | 0           |
| ST7-AS1 | KRT80      | -0.485985499 | 0           |
| ST7-AS1 | CDH6       | -0.587625845 | 0           |
| ST7-AS1 | UNC5B      | -0.543181889 | 0           |
| ST7-AS1 | PLEKHN1    | -0.536547741 | 0           |
| ST7-AS1 | SYTL1      | -0.347604655 | 8.83E-14    |
| ST7-AS1 | TMEM163    | -0.486826735 | 0           |
| ST7-AS1 | C4orf48    | -0.166942871 | 0.000451399 |
| ST7-AS1 | B3GNT7     | -0.406873995 | 0           |
| ST7-AS1 | BAIAP3     | -0.377530729 | 1.47E-16    |
| ST7-AS1 | PHLDA2     | -0.438425948 | 0           |
| ST7-AS1 | GAP43      | -0.466732042 | 3.93E-25    |
| ST7-AS1 | S100A1     | -0.3710092   | 8.58E-16    |
| ST7-AS1 | PTPRE      | -0.64971122  | 0           |
| ST7-AS1 | CCND1      | -0.636034149 | 0           |
| ST7-AS1 | ST6GALNAC5 | -0.548554076 | 7.42E-36    |
| ST7-AS1 | KRT17      | -0.201926006 | 2.10E-05    |
| ST7-AS1 | HPCAL4     | -0.341823231 | 2.42E-13    |
| ST7-AS1 | GABBR2     | -0.300196303 | 1.68E-10    |
| ST7-AS1 | DIRAS3     | -0.313658774 | 2.28E-11    |
| ST7-AS1 | SERINC2    | -0.404582332 | 0           |
| ST7-AS1 | PTCHD4     | -0.538488782 | 0           |
| ST7-AS1 | EPS8       | -0.560963727 | 0           |
| ST7-AS1 | LY6E       | -0.370674038 | 9.28E-16    |
| ST7-AS1 | UPP1       | -0.441664799 | 0           |
| ST7-AS1 | AHNAK2     | -0.616337368 | 0           |
| ST7-AS1 | PLXNC1     | -0.471527898 | 0           |
| ST7-AS1 | TNC        | -0.52520843  | 0           |
| ST7-AS1 | DUSP4      | -0.498489435 | 0           |
| ST7-AS1 | NRCAM      | -0.606376997 | 0           |
| ST7-AS1 | NRP2       | -0.50538584  | 0           |
| ST7-AS1 | CTSC       | -0.530243648 | 0           |
| ST7-AS1 | AMIGO2     | -0.47566316  | 0           |
| ST7-AS1 | NAB2       | -0.387342171 | 0           |
| ST7-AS1 | TBC1D2     | -0.583194428 | 0           |
| ST7-AS1 | PHLDA3     | -0.430314141 | 0           |

|         |         |              |          |
|---------|---------|--------------|----------|
| ST7-AS1 | PTP4A3  | -0.338480697 | 4.28E-13 |
| ST7-AS1 | CRABP2  | -0.259722226 | 3.78E-08 |
| ST7-AS1 | GOS2    | -0.359655988 | 9.47E-15 |
| ST7-AS1 | S100A6  | -0.437758179 | 0        |
| ST7-AS1 | FOXQ1   | -0.453810313 | 0        |
| ST7-AS1 | LRG1    | -0.461810636 | 0        |
| ST7-AS1 | LAMP5   | -0.375687839 | 2.58E-16 |
| ST7-AS1 | ALDH3B1 | -0.531860449 | 0        |
| ST7-AS1 | CDH2    | -0.190700732 | 5.97E-05 |
| ST7-AS1 | SCG5    | -0.261985663 | 2.85E-08 |
| ST7-AS1 | ZCCHC16 | -0.300277582 | 1.34E-10 |
| ST7-AS1 | GRB7    | -0.473077327 | 0        |
| ST7-AS1 | TIAM1   | -0.5256416   | 0        |
| ST7-AS1 | FXD5    | -0.353106801 | 3.27E-14 |
| ST7-AS1 | CLDN9   | -0.365009347 | 3.22E-15 |
| ST7-AS1 | FAM43A  | -0.415164517 | 0        |
| ST7-AS1 | CHST2   | -0.482737854 | 0        |
| ST7-AS1 | HMGA2   | -0.493605982 | 0        |
| ST7-AS1 | GALNT7  | -0.595292    | 0        |
| ST7-AS1 | CBLN1   | -0.380656252 | 4.26E-17 |
| ST7-AS1 | STRA6   | -0.482224545 | 0        |
| ST7-AS1 | MUC21   | -0.533539559 | 1.15E-33 |
| ST7-AS1 | PRR36   | -0.450026382 | 0        |
| ST7-AS1 | NFE2L3  | -0.561853896 | 0        |
| ST7-AS1 | NR1D1   | -0.301271428 | 1.44E-10 |
| ST7-AS1 | MUC1    | -0.455663131 | 0        |
| ST7-AS1 | NAT8L   | -0.292895662 | 4.75E-10 |
| ST7-AS1 | APOC1   | -0.203481818 | 1.81E-05 |
| ST7-AS1 | EVA1A   | -0.534029139 | 0        |
| ST7-AS1 | ENTPD1  | -0.412419259 | 0        |
| ST7-AS1 | COL1A1  | -0.424316416 | 0        |
| ST7-AS1 | FNDC4   | -0.453044392 | 0        |
| ST7-AS1 | FRMD3   | -0.303173889 | 1.09E-10 |
| ST7-AS1 | SHROOM4 | -0.613232553 | 0        |
| ST7-AS1 | NELL2   | -0.326672189 | 2.98E-12 |
| ST7-AS1 | EPHB3   | -0.612434152 | 0        |
| ST7-AS1 | TMC6    | -0.510151142 | 0        |
| ST7-AS1 | NOD1    | -0.436055992 | 0        |
| ST7-AS1 | GGCT    | -0.403120417 | 0        |
| ST7-AS1 | ICAM1   | -0.583362788 | 0        |
| ST7-AS1 | PRSS23  | -0.523450217 | 0        |
| ST7-AS1 | CFI     | -0.519314955 | 0        |
| ST7-AS1 | CD55    | -0.549608246 | 0        |
| ST7-AS1 | RASD2   | -0.487369403 | 0        |
| ST7-AS1 | KLK11   | -0.328253481 | 1.73E-12 |
| ST7-AS1 | ICAM5   | -0.418318549 | 0        |
| ST7-AS1 | ADORA1  | -0.467719145 | 0        |
| ST7-AS1 | ITGA2   | -0.646855471 | 0        |
| ST7-AS1 | ABCC3   | -0.424181103 | 0        |
| ST7-AS1 | MFGE8   | -0.506657551 | 0        |
| ST7-AS1 | STK32A  | -0.493753776 | 0        |

|         |           |              |          |
|---------|-----------|--------------|----------|
| ST7-AS1 | CYSLTR2   | -0.471440952 | 0        |
| ST7-AS1 | LAD1      | -0.492017974 | 0        |
| ST7-AS1 | MGAT3     | -0.50659103  | 0        |
| ST7-AS1 | IGFBP6    | -0.299557752 | 1.84E-10 |
| ST7-AS1 | CYP2S1    | -0.574096427 | 0        |
| ST7-AS1 | KCNJ2     | -0.487335646 | 0        |
| ST7-AS1 | FAM20A    | -0.458502852 | 0        |
| ST7-AS1 | TGFA      | -0.556901795 | 0        |
| ST7-AS1 | MXRA8     | -0.400820528 | 0        |
| ST7-AS1 | C8orf4    | -0.423242851 | 0        |
| ST7-AS1 | CLDN10    | -0.492973958 | 2.92E-28 |
| ST7-AS1 | PDE5A     | -0.578508129 | 0        |
| ST7-AS1 | APOE      | -0.209796265 | 9.75E-06 |
| ST7-AS1 | SPOCK2    | -0.490342452 | 0        |
| ST7-AS1 | TENM1     | -0.298171294 | 2.25E-10 |
| ST7-AS1 | SLIT1     | -0.336320518 | 6.15E-13 |
| ST7-AS1 | CXCL14    | -0.293841148 | 4.16E-10 |
| ST7-AS1 | ECM1      | -0.308278182 | 5.12E-11 |
| ST7-AS1 | DUSP5     | -0.470229237 | 0        |
| ST7-AS1 | SEZ6L2    | -0.486319809 | 0        |
| ST7-AS1 | THRSP     | -0.306128924 | 7.05E-11 |
| ST7-AS1 | C19orf33  | -0.413869969 | 0        |
| ST7-AS1 | MPZL2     | -0.591273754 | 0        |
| ST7-AS1 | CTSH      | -0.430898652 | 0        |
| ST7-AS1 | CYP1B1    | -0.545774956 | 0        |
| ST7-AS1 | ALOX5     | -0.515132745 | 0        |
| ST7-AS1 | SYTL5     | -0.579988078 | 8.03E-41 |
| ST7-AS1 | TNFRSF12A | -0.38135097  | 2.88E-17 |
| ST7-AS1 | DUSP6     | -0.494823512 | 0        |
| ST7-AS1 | ALOX15B   | -0.485363968 | 0        |
| ST7-AS1 | SDC4      | -0.466349282 | 0        |
| ST7-AS1 | MDK       | -0.393973908 | 0        |
| ST7-AS1 | KRT19     | -0.481233671 | 0        |
| ST7-AS1 | MET       | -0.649261312 | 0        |
| ST7-AS1 | TESC      | -0.238637427 | 4.57E-07 |
| ST7-AS1 | CXCL17    | -0.435542982 | 9.50E-22 |
| ST7-AS1 | NPC2      | -0.335603248 | 6.94E-13 |
| ST7-AS1 | COMP      | -0.391205814 | 0        |
| ST7-AS1 | TUSC3     | -0.505736177 | 0        |
| ST7-AS1 | TMPRSS4   | -0.56982259  | 0        |
| ST7-AS1 | LGALS3    | -0.455472928 | 0        |
| ST7-AS1 | CRLF1     | -0.388899117 | 0        |
| ST7-AS1 | CTXN1     | -0.390901148 | 0        |
| ST7-AS1 | PCSK1N    | -0.299516619 | 1.85E-10 |
| ST7-AS1 | NMU       | -0.401635439 | 1.90E-18 |
| ST7-AS1 | GALE      | -0.411896448 | 0        |
| ST7-AS1 | PCSK2     | -0.303806058 | 9.92E-11 |
| ST7-AS1 | GJB3      | -0.528781733 | 0        |
| ST7-AS1 | SLPI      | -0.478317358 | 0        |
| ST7-AS1 | AGR2      | -0.371883767 | 6.96E-16 |
| ST7-AS1 | MRC2      | -0.497158009 | 0        |



|         |          |              |          |
|---------|----------|--------------|----------|
| ST7-AS1 | GOLT1A   | -0.337040483 | 5.45E-13 |
| ST7-AS1 | SLC27A6  | -0.523348325 | 3.08E-32 |
| ST7-AS1 | KCNN4    | -0.515343657 | 0        |
| ST7-AS1 | ETV4     | -0.346157644 | 8.39E-14 |
| ST7-AS1 | SYT12    | -0.465709881 | 0        |
| ST7-AS1 | PVRL4    | -0.553974702 | 0        |
| ST7-AS1 | PLCD3    | -0.478003472 | 0        |
| ST7-AS1 | PLAU     | -0.565549321 | 0        |
| ST7-AS1 | LRRK2    | -0.43946065  | 0        |
| ST7-AS1 | SFN      | -0.438741678 | 0        |
| ST7-AS1 | LPAR5    | -0.511303001 | 0        |
| ST7-AS1 | NGEF     | -0.513367299 | 0        |
| ST7-AS1 | DTX4     | -0.552360879 | 0        |
| ST7-AS1 | CST6     | -0.413778343 | 0        |
| ST7-AS1 | QPCT     | -0.442714252 | 0        |
| ST7-AS1 | TIMP1    | -0.401039099 | 0        |
| ST7-AS1 | CAMK2N1  | -0.484855057 | 0        |
| ST7-AS1 | KLHDC8A  | -0.352424564 | 3.70E-14 |
| ST7-AS1 | PDLIM4   | -0.436893398 | 0        |
| ST7-AS1 | SCEL     | -0.58532397  | 0        |
| ST7-AS1 | LCN2     | -0.527463356 | 0        |
| ST7-AS1 | PROS1    | -0.582406097 | 0        |
| ST7-AS1 | GABRB2   | -0.588863658 | 0        |
| ST7-AS1 | TMPRSS6  | -0.465174587 | 0        |
| ST7-AS1 | KLK7     | -0.404539733 | 1.03E-18 |
| ST7-AS1 | PDZK1IP1 | -0.481827969 | 0        |
| ST7-AS1 | CDH3     | -0.536477673 | 0        |
| ST7-AS1 | LRP4     | -0.470003716 | 0        |
| ST7-AS1 | IGSF1    | -0.420748219 | 0        |
| ST7-AS1 | B3GNT3   | -0.585598425 | 0        |
| ST7-AS1 | CLDN1    | -0.64340897  | 0        |
| ST7-AS1 | GDF15    | -0.449860716 | 0        |
| ST7-AS1 | ARHGAP36 | -0.376221755 | 3.29E-16 |
| ST7-AS1 | LAMB3    | -0.576794169 | 0        |
| ST7-AS1 | KLK10    | -0.419392965 | 0        |
| ST7-AS1 | DPP4     | -0.582405955 | 0        |
| ST7-AS1 | METTL7B  | -0.423707084 | 0        |
| ST7-AS1 | LIPH     | -0.642455967 | 0        |
| ST7-AS1 | CLDN16   | -0.595140234 | 0        |
| ST7-AS1 | CHI3L1   | -0.443040903 | 0        |
| ST7-AS1 | SLC22A31 | -0.418314939 | 5.04E-20 |
| ST7-AS1 | TACSTD2  | -0.488464953 | 0        |
| ST7-AS1 | SFTPB    | -0.464715319 | 0        |
| ST7-AS1 | RXRG     | -0.314460296 | 2.02E-11 |
| ST7-AS1 | DCSTAMP  | -0.511846305 | 1.10E-30 |
| ST7-AS1 | CITED1   | -0.319996199 | 8.58E-12 |
| ST7-AS1 | SERPINA1 | -0.508687666 | 0        |
| ST7-AS1 | PRR15    | -0.425272398 | 0        |
| ST7-AS1 | SLC34A2  | -0.545377953 | 0        |
| ST7-AS1 | FN1      | -0.677974112 | 0        |
| ST7-AS1 | ZCCHC12  | -0.331663438 | 1.33E-12 |

|              |           |             |          |
|--------------|-----------|-------------|----------|
| ATP6VOE2-AS1 | TFF3      | 0.68358221  | 0        |
| ATP6VOE2-AS1 | CCL21     | 0.460971336 | 1.76E-24 |
| ATP6VOE2-AS1 | TPO       | 0.662627902 | 0        |
| ATP6VOE2-AS1 | MT1G      | 0.628856906 | 0        |
| ATP6VOE2-AS1 | DI01      | 0.631584576 | 0        |
| ATP6VOE2-AS1 | DPT       | 0.418880727 | 4.44E-20 |
| ATP6VOE2-AS1 | CDH16     | 0.670386251 | 0        |
| ATP6VOE2-AS1 | CRABP1    | 0.571122649 | 2.29E-39 |
| ATP6VOE2-AS1 | SLC26A7   | 0.618583501 | 0        |
| ATP6VOE2-AS1 | MT1H      | 0.616330647 | 2.81E-47 |
| ATP6VOE2-AS1 | SLC26A4   | 0.642140521 | 0        |
| ATP6VOE2-AS1 | SLC5A8    | 0.653569009 | 7.88E-55 |
| ATP6VOE2-AS1 | PKHD1L1   | 0.597959388 | 6.53E-44 |
| ATP6VOE2-AS1 | TFCP2L1   | 0.66393947  | 0        |
| ATP6VOE2-AS1 | WSCD2     | 0.639551236 | 7.28E-52 |
| ATP6VOE2-AS1 | IPCEF1    | 0.599913338 | 0        |
| ATP6VOE2-AS1 | SLC5A5    | 0.565302235 | 1.95E-38 |
| ATP6VOE2-AS1 | MT1F      | 0.660806571 | 0        |
| ATP6VOE2-AS1 | FOSB      | 0.294004544 | 4.06E-10 |
| ATP6VOE2-AS1 | SEMA3D    | 0.597224552 | 8.82E-44 |
| ATP6VOE2-AS1 | BMP8A     | 0.579616586 | 0        |
| ATP6VOE2-AS1 | MATN2     | 0.686948715 | 0        |
| ATP6VOE2-AS1 | PLA2R1    | 0.606262251 | 0        |
| ATP6VOE2-AS1 | COL23A1   | 0.717688367 | 0        |
| ATP6VOE2-AS1 | HGD       | 0.681454086 | 0        |
| ATP6VOE2-AS1 | TCEAL2    | 0.556849173 | 0        |
| ATP6VOE2-AS1 | CHRD1     | 0.352994053 | 2.50E-14 |
| ATP6VOE2-AS1 | TNFRSF11B | 0.507660765 | 0        |
| ATP6VOE2-AS1 | FAM167A   | 0.642120096 | 0        |
| ATP6VOE2-AS1 | KIT       | 0.584665137 | 0        |
| ATP6VOE2-AS1 | SLC4A4    | 0.67366822  | 0        |
| ATP6VOE2-AS1 | SMOC2     | 0.463288721 | 0        |
| ATP6VOE2-AS1 | FHL1      | 0.629564106 | 0        |
| ATP6VOE2-AS1 | OTOS      | 0.658810923 | 0        |
| ATP6VOE2-AS1 | IGFBPL1   | 0.659798344 | 3.37E-56 |
| ATP6VOE2-AS1 | HBB       | 0.307247736 | 5.97E-11 |
| ATP6VOE2-AS1 | BEX1      | 0.573216043 | 0        |
| ATP6VOE2-AS1 | FABP4     | 0.541181637 | 9.13E-35 |
| ATP6VOE2-AS1 | LMOD1     | 0.592626313 | 0        |
| ATP6VOE2-AS1 | SOD3      | 0.640552654 | 0        |
| ATP6VOE2-AS1 | TMEM171   | 0.626318589 | 0        |
| ATP6VOE2-AS1 | PI16      | 0.413734515 | 0        |
| ATP6VOE2-AS1 | ZMAT4     | 0.674895813 | 1.17E-59 |
| ATP6VOE2-AS1 | MFAP4     | 0.305838584 | 7.36E-11 |
| ATP6VOE2-AS1 | CWH43     | 0.61900946  | 8.69E-48 |
| ATP6VOE2-AS1 | SPX       | 0.636851556 | 0        |
| ATP6VOE2-AS1 | APOD      | 0.250331899 | 1.18E-07 |
| ATP6VOE2-AS1 | DPP6      | 0.665077854 | 0        |
| ATP6VOE2-AS1 | MMRN1     | 0.447087091 | 0        |
| ATP6VOE2-AS1 | WDR72     | 0.61250734  | 0        |
| ATP6VOE2-AS1 | MPPED2    | 0.687054951 | 0        |

|              |            |             |          |
|--------------|------------|-------------|----------|
| ATP6VOE2-AS1 | PAPSS2     | 0.494734155 | 0        |
| ATP6VOE2-AS1 | DCN        | 0.24094143  | 3.52E-07 |
| ATP6VOE2-AS1 | SORBS2     | 0.626742966 | 0        |
| ATP6VOE2-AS1 | EGR2       | 0.287634497 | 9.88E-10 |
| ATP6VOE2-AS1 | EDN3       | 0.439908081 | 3.35E-22 |
| ATP6VOE2-AS1 | DIO2       | 0.608826099 | 0        |
| ATP6VOE2-AS1 | ITPR1      | 0.613197236 | 0        |
| ATP6VOE2-AS1 | CFD        | 0.403785491 | 0        |
| ATP6VOE2-AS1 | CPXM1      | 0.463738061 | 0        |
| ATP6VOE2-AS1 | ELM01      | 0.627963332 | 0        |
| ATP6VOE2-AS1 | GPC3       | 0.495726394 | 1.32E-28 |
| ATP6VOE2-AS1 | MYOC       | 0.275372603 | 4.44E-09 |
| ATP6VOE2-AS1 | DEPTOR     | 0.571272024 | 0        |
| ATP6VOE2-AS1 | DGKI       | 0.56622404  | 0        |
| ATP6VOE2-AS1 | CARTPT     | 0.584315313 | 1.51E-41 |
| ATP6VOE2-AS1 | IYD        | 0.492890414 | 0        |
| ATP6VOE2-AS1 | LYVE1      | 0.372792943 | 5.57E-16 |
| ATP6VOE2-AS1 | CLCNKB     | 0.665981215 | 0        |
| ATP6VOE2-AS1 | NCAM1      | 0.573169805 | 0        |
| ATP6VOE2-AS1 | HBA2       | 0.319490266 | 9.28E-12 |
| ATP6VOE2-AS1 | GLT8D2     | 0.540057926 | 0        |
| ATP6VOE2-AS1 | OGDHL      | 0.687333093 | 0        |
| ATP6VOE2-AS1 | LIFR       | 0.553756273 | 0        |
| ATP6VOE2-AS1 | CSGALNACT1 | 0.461637169 | 0        |
| ATP6VOE2-AS1 | RAP1GAP    | 0.653572026 | 0        |
| ATP6VOE2-AS1 | COL9A3     | 0.632586939 | 0        |
| ATP6VOE2-AS1 | FBLN1      | 0.295462346 | 3.31E-10 |
| ATP6VOE2-AS1 | EFEMP1     | 0.406060842 | 0        |
| ATP6VOE2-AS1 | AOX1       | 0.556182771 | 5.17E-37 |
| ATP6VOE2-AS1 | GRIN2C     | 0.629605381 | 0        |
| ATP6VOE2-AS1 | C11orf74   | 0.681841869 | 0        |
| ATP6VOE2-AS1 | PPARGC1A   | 0.677156563 | 0        |
| ATP6VOE2-AS1 | ANGPTL1    | 0.541169078 | 0        |
| ATP6VOE2-AS1 | SCARA5     | 0.38848985  | 2.89E-17 |
| ATP6VOE2-AS1 | LTF        | 0.570146121 | 0        |
| ATP6VOE2-AS1 | CA4        | 0.542715083 | 5.44E-35 |
| ATP6VOE2-AS1 | TG         | 0.554239512 | 0        |
| ATP6VOE2-AS1 | FCGBP      | 0.605442716 | 0        |
| ATP6VOE2-AS1 | PBX4       | 0.686369877 | 0        |
| ATP6VOE2-AS1 | CYR61      | 0.33616393  | 6.32E-13 |
| ATP6VOE2-AS1 | FOS        | 0.352567961 | 3.61E-14 |
| ATP6VOE2-AS1 | KHDRBS2    | 0.625623871 | 0        |
| ATP6VOE2-AS1 | MUM1L1     | 0.52756789  | 0        |
| ATP6VOE2-AS1 | RGS16      | 0.60499139  | 0        |
| ATP6VOE2-AS1 | MT1M       | 0.536393422 | 0        |
| ATP6VOE2-AS1 | LRP2       | 0.536146767 | 0        |
| ATP6VOE2-AS1 | MAFB       | 0.503979241 | 0        |
| ATP6VOE2-AS1 | KCNK2      | 0.523806086 | 0        |
| ATP6VOE2-AS1 | TBC1D4     | 0.564453629 | 0        |
| ATP6VOE2-AS1 | MIOX       | 0.681652186 | 2.85E-61 |
| ATP6VOE2-AS1 | TPPP       | 0.582493752 | 0        |

|              |          |             |          |
|--------------|----------|-------------|----------|
| ATP6VOE2-AS1 | FMOD     | 0.596054658 | 0        |
| ATP6VOE2-AS1 | CITED2   | 0.412826474 | 0        |
| ATP6VOE2-AS1 | RGS8     | 0.645141021 | 4.99E-53 |
| ATP6VOE2-AS1 | ABI3BP   | 0.411064573 | 0        |
| ATP6VOE2-AS1 | ADH1B    | 0.446520345 | 6.70E-23 |
| ATP6VOE2-AS1 | OGN      | 0.314393532 | 1.58E-11 |
| ATP6VOE2-AS1 | NR4A1    | 0.258563559 | 4.36E-08 |
| ATP6VOE2-AS1 | FOXJ1    | 0.565823343 | 1.61E-38 |
| ATP6VOE2-AS1 | ALDH1A1  | 0.577723911 | 0        |
| ATP6VOE2-AS1 | OCA2     | 0.554246978 | 1.02E-36 |
| ATP6VOE2-AS1 | TMEM139  | 0.461802551 | 0        |
| ATP6VOE2-AS1 | ARHGAP24 | 0.598998063 | 0        |
| ATP6VOE2-AS1 | SLC25A15 | 0.556978812 | 0        |
| ATP6VOE2-AS1 | DES      | 0.322047813 | 4.73E-12 |
| ATP6VOE2-AS1 | GDF10    | 0.534625951 | 8.08E-34 |
| ATP6VOE2-AS1 | KIAA1324 | 0.579726793 | 0        |
| ATP6VOE2-AS1 | JUN      | 0.349036926 | 6.84E-14 |
| ATP6VOE2-AS1 | C7       | 0.204589424 | 1.63E-05 |
| ATP6VOE2-AS1 | LGI3     | 0.652809084 | 0        |
| ATP6VOE2-AS1 | CDON     | 0.644567496 | 0        |
| ATP6VOE2-AS1 | BCL2     | 0.61436101  | 0        |
| ATP6VOE2-AS1 | HLF      | 0.588475308 | 0        |
| ATP6VOE2-AS1 | EGR1     | 0.345871405 | 1.20E-13 |
| ATP6VOE2-AS1 | IP6K3    | 0.617225836 | 0        |
| ATP6VOE2-AS1 | SCUBE3   | 0.497331334 | 0        |
| ATP6VOE2-AS1 | PKNOX2   | 0.563728841 | 0        |
| ATP6VOE2-AS1 | SMAD9    | 0.471238408 | 0        |
| ATP6VOE2-AS1 | IQGAP2   | 0.595111725 | 0        |
| ATP6VOE2-AS1 | GNA14    | 0.60513805  | 0        |
| ATP6VOE2-AS1 | LAYN     | 0.541301554 | 0        |
| ATP6VOE2-AS1 | AVPR1A   | 0.525557491 | 0        |
| ATP6VOE2-AS1 | PDLIM3   | 0.508957299 | 0        |
| ATP6VOE2-AS1 | GPM6A    | 0.60427795  | 0        |
| ATP6VOE2-AS1 | SDPR     | 0.390882851 | 0        |
| ATP6VOE2-AS1 | CRYAB    | 0.430133866 | 0        |
| ATP6VOE2-AS1 | FOXA2    | 0.417498283 | 6.04E-20 |
| ATP6VOE2-AS1 | C8orf88  | 0.511887654 | 0        |
| ATP6VOE2-AS1 | ISM1     | 0.510034693 | 0        |
| ATP6VOE2-AS1 | BMP2     | 0.298441777 | 2.16E-10 |
| ATP6VOE2-AS1 | ID4      | 0.564811201 | 0        |
| ATP6VOE2-AS1 | NUPR1    | 0.540446276 | 0        |
| ATP6VOE2-AS1 | SERTM1   | 0.593145091 | 4.59E-43 |
| ATP6VOE2-AS1 | IRS1     | 0.579626514 | 0        |
| ATP6VOE2-AS1 | FIBIN    | 0.358489094 | 1.19E-14 |
| ATP6VOE2-AS1 | PODN     | 0.302240034 | 1.25E-10 |
| ATP6VOE2-AS1 | TDRD9    | 0.529192918 | 0        |
| ATP6VOE2-AS1 | EPHA3    | 0.38819603  | 0        |
| ATP6VOE2-AS1 | AIF1L    | 0.449632216 | 0        |
| ATP6VOE2-AS1 | EBF4     | 0.672961588 | 0        |
| ATP6VOE2-AS1 | ADM2     | 0.621896674 | 0        |
| ATP6VOE2-AS1 | GSTM3    | 0.652998437 | 0        |

|              |          |             |             |
|--------------|----------|-------------|-------------|
| ATP6VOE2-AS1 | HSD17B6  | 0.346459462 | 1.08E-13    |
| ATP6VOE2-AS1 | AGR3     | 0.365293164 | 2.64E-15    |
| ATP6VOE2-AS1 | EPHB1    | 0.553489052 | 0           |
| ATP6VOE2-AS1 | TMOD1    | 0.42218659  | 0           |
| ATP6VOE2-AS1 | WASF3    | 0.599797031 | 0           |
| ATP6VOE2-AS1 | SELV     | 0.659118433 | 4.77E-56    |
| ATP6VOE2-AS1 | ENPP1    | 0.424111319 | 0           |
| ATP6VOE2-AS1 | SYNE1    | 0.598953121 | 4.35E-44    |
| ATP6VOE2-AS1 | PLCH1    | 0.547510475 | 0           |
| ATP6VOE2-AS1 | CCDC146  | 0.62576741  | 0           |
| ATP6VOE2-AS1 | SLC16A2  | 0.577649447 | 0           |
| ATP6VOE2-AS1 | IER2     | 0.484415503 | 0           |
| ATP6VOE2-AS1 | KCNAB1   | 0.551442909 | 0           |
| ATP6VOE2-AS1 | SYNDIG1  | 0.555109115 | 0           |
| ATP6VOE2-AS1 | C16orf89 | 0.609847185 | 0           |
| ATP6VOE2-AS1 | CTGF     | 0.205560441 | 1.48E-05    |
| ATP6VOE2-AS1 | NR4A3    | 0.123553474 | 0.009598782 |
| ATP6VOE2-AS1 | KIAA1456 | 0.617250657 | 0           |
| ATP6VOE2-AS1 | AQP4     | 0.496154654 | 0           |
| ATP6VOE2-AS1 | RNF150   | 0.59621692  | 0           |
| ATP6VOE2-AS1 | C1S      | 0.190610807 | 6.02E-05    |
| ATP6VOE2-AS1 | PFKFB2   | 0.569875779 | 0           |
| ATP6VOE2-AS1 | PROX1    | 0.552073801 | 0           |
| ATP6VOE2-AS1 | TCF7L1   | 0.641502963 | 0           |
| ATP6VOE2-AS1 | HSPB6    | 0.379791755 | 6.39E-17    |
| ATP6VOE2-AS1 | FHDC1    | 0.46654984  | 0           |
| ATP6VOE2-AS1 | PRR15L   | 0.569945705 | 0           |
| ATP6VOE2-AS1 | SLC1A1   | 0.532307236 | 0           |
| ATP6VOE2-AS1 | BTBD11   | 0.626211644 | 0           |
| ATP6VOE2-AS1 | TRIM58   | 0.473039314 | 0           |
| ATP6VOE2-AS1 | LRIG1    | 0.583719509 | 0           |
| ATP6VOE2-AS1 | ROR2     | 0.479289368 | 0           |
| ATP6VOE2-AS1 | GPR125   | 0.602618455 | 0           |
| ATP6VOE2-AS1 | FLRT1    | 0.69519782  | 0           |
| ATP6VOE2-AS1 | PGF      | 0.619586148 | 0           |
| ATP6VOE2-AS1 | DUSP1    | 0.273592196 | 6.50E-09    |
| ATP6VOE2-AS1 | PLA2G7   | 0.466142768 | 0           |
| ATP6VOE2-AS1 | PLSCR4   | 0.465786473 | 0           |
| ATP6VOE2-AS1 | FAM46B   | 0.489279808 | 0           |
| ATP6VOE2-AS1 | GLDC     | 0.520765098 | 0           |
| ATP6VOE2-AS1 | ZBTB16   | 0.380485055 | 4.65E-17    |
| ATP6VOE2-AS1 | OMD      | 0.239930967 | 3.63E-07    |
| ATP6VOE2-AS1 | HSD11B2  | 0.546589384 | 0           |
| ATP6VOE2-AS1 | FGL2     | 0.261243146 | 3.13E-08    |
| ATP6VOE2-AS1 | CLCNKA   | 0.720582792 | 1.68E-71    |
| ATP6VOE2-AS1 | GATM     | 0.504552972 | 0           |
| ATP6VOE2-AS1 | TNS3     | 0.48223646  | 0           |
| ATP6VOE2-AS1 | TOB1     | 0.344209499 | 1.60E-13    |
| ATP6VOE2-AS1 | MARC2    | 0.678708403 | 0           |
| ATP6VOE2-AS1 | LRRC2    | 0.552423004 | 0           |
| ATP6VOE2-AS1 | SORD     | 0.427225496 | 0           |

|              |          |             |             |
|--------------|----------|-------------|-------------|
| ATP6VOE2-AS1 | RIMS4    | 0.514706383 | 0           |
| ATP6VOE2-AS1 | SLC29A4  | 0.617466534 | 0           |
| ATP6VOE2-AS1 | SLC39A14 | 0.554292559 | 0           |
| ATP6VOE2-AS1 | FAXDC2   | 0.630181239 | 0           |
| ATP6VOE2-AS1 | HSPB8    | 0.407409004 | 0           |
| ATP6VOE2-AS1 | CCL19    | 0.094842851 | 0.047034274 |
| ATP6VOE2-AS1 | KCNIP3   | 0.633571147 | 0           |
| ATP6VOE2-AS1 | CGNL1    | 0.514079037 | 0           |
| ATP6VOE2-AS1 | ATF3     | 0.054298091 | 0.256153484 |
| ATP6VOE2-AS1 | SGCD     | 0.383529589 | 0           |
| ATP6VOE2-AS1 | STARD13  | 0.489607168 | 0           |
| ATP6VOE2-AS1 | LDHD     | 0.680743766 | 0           |
| ATP6VOE2-AS1 | RCAN1    | 0.335365528 | 7.22E-13    |
| ATP6VOE2-AS1 | ID3      | 0.527693984 | 0           |
| ATP6VOE2-AS1 | SYTL3    | 0.591545798 | 0           |
| ATP6VOE2-AS1 | MT1E     | 0.494047379 | 0           |
| ATP6VOE2-AS1 | CAMK1D   | 0.523107254 | 0           |
| ATP6VOE2-AS1 | PRKCQ    | 0.628939314 | 0           |
| ATP6VOE2-AS1 | NUAK2    | 0.486261372 | 0           |
| ATP6VOE2-AS1 | LIPG     | 0.504953094 | 0           |
| ATP6VOE2-AS1 | SLC25A25 | 0.324670583 | 4.11E-12    |
| ATP6VOE2-AS1 | PRKX     | 0.33430714  | 8.60E-13    |
| ATP6VOE2-AS1 | SRPX     | 0.279018317 | 3.18E-09    |
| ATP6VOE2-AS1 | FAM189A1 | 0.569843582 | 0           |
| ATP6VOE2-AS1 | PLEKHH1  | 0.50867022  | 0           |
| ATP6VOE2-AS1 | WNT11    | 0.558294777 | 0           |
| ATP6VOE2-AS1 | SNAI1    | 0.398521632 | 0           |
| ATP6VOE2-AS1 | FDCSP    | 0.14203502  | 0.002857977 |
| ATP6VOE2-AS1 | MT1X     | 0.493309968 | 0           |
| ATP6VOE2-AS1 | ACACB    | 0.683255843 | 0           |
| ATP6VOE2-AS1 | ARC      | 0.15468715  | 0.001162091 |
| ATP6VOE2-AS1 | KLK4     | 0.393877694 | 9.62E-18    |
| ATP6VOE2-AS1 | ZFPM2    | 0.387191256 | 0           |
| ATP6VOE2-AS1 | AKAP12   | 0.340282454 | 3.15E-13    |
| ATP6VOE2-AS1 | GJB6     | 0.419004675 | 4.31E-20    |
| ATP6VOE2-AS1 | ERO1LB   | 0.56363296  | 0           |
| ATP6VOE2-AS1 | DNALI1   | 0.502346695 | 0           |
| ATP6VOE2-AS1 | HKDC1    | 0.510625445 | 0           |
| ATP6VOE2-AS1 | ZFP36L2  | 0.484905692 | 0           |
| ATP6VOE2-AS1 | CAPSL    | 0.616248634 | 2.91E-47    |
| ATP6VOE2-AS1 | CYP7B1   | 0.435994009 | 0           |
| ATP6VOE2-AS1 | CPQ      | 0.455525975 | 0           |
| ATP6VOE2-AS1 | RPS6KA6  | 0.584832171 | 1.23E-41    |
| ATP6VOE2-AS1 | TLE1     | 0.524239398 | 0           |
| ATP6VOE2-AS1 | TP53INP2 | 0.533290026 | 0           |
| ATP6VOE2-AS1 | KATNAL2  | 0.710530556 | 0           |
| ATP6VOE2-AS1 | SGPP2    | 0.297553735 | 2.45E-10    |
| ATP6VOE2-AS1 | CTH      | 0.530839506 | 0           |
| ATP6VOE2-AS1 | KIF12    | 0.47973346  | 0           |
| ATP6VOE2-AS1 | TMEM220  | 0.610060508 | 0           |
| ATP6VOE2-AS1 | CENPJ    | 0.505663273 | 0           |

|              |          |             |             |
|--------------|----------|-------------|-------------|
| ATP6VOE2-AS1 | FAM155B  | 0.410141922 | 0           |
| ATP6VOE2-AS1 | WFS1     | 0.672962155 | 0           |
| ATP6VOE2-AS1 | SELENBP1 | 0.557912668 | 0           |
| ATP6VOE2-AS1 | SNTA1    | 0.657445315 | 0           |
| ATP6VOE2-AS1 | FRAS1    | 0.281900731 | 2.16E-09    |
| ATP6VOE2-AS1 | FBLN7    | 0.636790566 | 0           |
| ATP6VOE2-AS1 | AGPAT9   | 0.45397839  | 0           |
| ATP6VOE2-AS1 | GPR83    | 0.504672541 | 0           |
| ATP6VOE2-AS1 | PRTG     | 0.49268787  | 0           |
| ATP6VOE2-AS1 | EGR3     | 0.1192134   | 0.012472961 |
| ATP6VOE2-AS1 | GRAMD2   | 0.488006961 | 0           |
| ATP6VOE2-AS1 | HYOU1    | 0.536691564 | 0           |
| ATP6VOE2-AS1 | FBLN5    | 0.349950499 | 5.81E-14    |
| ATP6VOE2-AS1 | ITM2A    | 0.498153848 | 0           |
| ATP6VOE2-AS1 | SRF      | 0.434951222 | 0           |
| ATP6VOE2-AS1 | FGFR2    | 0.377957659 | 1.28E-16    |
| ATP6VOE2-AS1 | MT1A     | 0.294051787 | 3.32E-10    |
| ATP6VOE2-AS1 | MAMDC2   | 0.274051464 | 6.12E-09    |
| ATP6VOE2-AS1 | FHL2     | 0.423665242 | 0           |
| ATP6VOE2-AS1 | FTCDNL1  | 0.599145573 | 0           |
| ATP6VOE2-AS1 | PKIA     | 0.376686798 | 1.92E-16    |
| ATP6VOE2-AS1 | DNAJB4   | 0.319596785 | 9.13E-12    |
| ATP6VOE2-AS1 | SLC25A33 | 0.602310952 | 0           |
| ATP6VOE2-AS1 | EYA2     | 0.44176366  | 0           |
| ATP6VOE2-AS1 | LPAR1    | 0.332576727 | 1.14E-12    |
| ATP6VOE2-AS1 | STX11    | 0.333493278 | 9.84E-13    |
| ATP6VOE2-AS1 | ARHGEF28 | 0.51544422  | 0           |
| ATP6VOE2-AS1 | OR2W3    | 0.552524559 | 0           |
| ATP6VOE2-AS1 | ALDH1B1  | 0.575152779 | 5.05E-40    |
| ATP6VOE2-AS1 | CXCL12   | 0.289304204 | 7.85E-10    |
| ATP6VOE2-AS1 | OLFM2    | 0.51310646  | 0           |
| ATP6VOE2-AS1 | TUB      | 0.459522519 | 0           |
| ATP6VOE2-AS1 | HTRA3    | 0.312353872 | 2.78E-11    |
| ATP6VOE2-AS1 | CKB      | 0.570077188 | 0           |
| ATP6VOE2-AS1 | RGS2     | 0.123087823 | 0.009876049 |
| ATP6VOE2-AS1 | SHANK2   | 0.532848345 | 0           |
| ATP6VOE2-AS1 | CNTFR    | 0.576306911 | 3.27E-40    |
| ATP6VOE2-AS1 | CYTH3    | 0.577638242 | 0           |
| ATP6VOE2-AS1 | PLAC9    | 0.44321905  | 0           |
| ATP6VOE2-AS1 | WWOX     | 0.650090918 | 0           |
| ATP6VOE2-AS1 | NPR3     | 0.420496033 | 0           |
| ATP6VOE2-AS1 | SDC2     | 0.335339147 | 7.25E-13    |
| ATP6VOE2-AS1 | KLF15    | 0.552818729 | 0           |
| ATP6VOE2-AS1 | TMEM164  | 0.593926676 | 0           |
| ATP6VOE2-AS1 | LONRF3   | 0.147183256 | 0.002007604 |
| ATP6VOE2-AS1 | GBP1     | 0.161116343 | 0.000713452 |
| ATP6VOE2-AS1 | ARHGAP6  | 0.45731213  | 0           |
| ATP6VOE2-AS1 | TMEM119  | 0.229231214 | 1.30E-06    |
| ATP6VOE2-AS1 | SH3RF1   | 0.403429338 | 0           |
| ATP6VOE2-AS1 | CRELD2   | 0.616756213 | 0           |
| ATP6VOE2-AS1 | PCP4     | 0.267309803 | 1.46E-08    |

|              |          |              |             |
|--------------|----------|--------------|-------------|
| ATP6VOE2-AS1 | GCSH     | 0.662720238  | 0           |
| ATP6VOE2-AS1 | IMPA2    | 0.502331802  | 0           |
| ATP6VOE2-AS1 | C1R      | 0.179608217  | 0.000158452 |
| ATP6VOE2-AS1 | SUCNR1   | 0.327184363  | 2.75E-12    |
| ATP6VOE2-AS1 | SFRP1    | 0.428953781  | 0           |
| ATP6VOE2-AS1 | UGT8     | 0.533819504  | 0           |
| ATP6VOE2-AS1 | TLE4     | 0.261880845  | 2.89E-08    |
| ATP6VOE2-AS1 | ANTXR1   | 0.338501406  | 4.27E-13    |
| ATP6VOE2-AS1 | GPX3     | 0.468945327  | 0           |
| ATP6VOE2-AS1 | DPY19L2  | 0.590420462  | 0           |
| ATP6VOE2-AS1 | FAM46C   | 0.476745235  | 0           |
| ATP6VOE2-AS1 | IL33     | 0.324331391  | 3.28E-12    |
| ATP6VOE2-AS1 | PEG3     | 0.511501289  | 0           |
| ATP6VOE2-AS1 | FAHD2A   | 0.727693842  | 0           |
| ATP6VOE2-AS1 | PTGDS    | 0.187345007  | 8.07E-05    |
| ATP6VOE2-AS1 | CHCHD10  | 0.593322592  | 0           |
| ATP6VOE2-AS1 | CD36     | 0.492701912  | 0           |
| ATP6VOE2-AS1 | ANKRD37  | 0.483788016  | 0           |
| ATP6VOE2-AS1 | TSPAN33  | 0.624749587  | 0           |
| ATP6VOE2-AS1 | PRDM16   | 0.509180834  | 0           |
| ATP6VOE2-AS1 | UST      | 0.488693028  | 0           |
| ATP6VOE2-AS1 | NEXN     | 0.466463036  | 0           |
| ATP6VOE2-AS1 | NUPR1L   | 0.301647687  | 1.10E-10    |
| ATP6VOE2-AS1 | SLC24A3  | 0.575048721  | 0           |
| ATP6VOE2-AS1 | MARC1    | 0.544073052  | 0           |
| ATP6VOE2-AS1 | MYH11    | 0.298462485  | 2.15E-10    |
| ATP6VOE2-AS1 | APOA1    | 0.584516583  | 1.39E-41    |
| ATP6VOE2-AS1 | TMEM178B | 0.370620566  | 9.40E-16    |
| ATP6VOE2-AS1 | CAPN6    | 0.285765712  | 1.07E-09    |
| ATP6VOE2-AS1 | PPM1L    | 0.553913003  | 0           |
| ATP6VOE2-AS1 | FZD8     | 0.615575419  | 0           |
| ATP6VOE2-AS1 | RCAN2    | 0.558587245  | 0           |
| ATP6VOE2-AS1 | COPZ2    | 0.676074629  | 0           |
| ATP6VOE2-AS1 | GAS1     | 0.337921434  | 4.70E-13    |
| ATP6VOE2-AS1 | DACT1    | 0.436546323  | 0           |
| ATP6VOE2-AS1 | WBSCR17  | 0.46220083   | 0           |
| ATP6VOE2-AS1 | NCS1     | 0.485482402  | 0           |
| ATP6VOE2-AS1 | SPIRE2   | 0.561891058  | 0           |
| ATP6VOE2-AS1 | C15orf52 | 0.512145514  | 0           |
| ATP6VOE2-AS1 | SPAG5    | 0.558613343  | 0           |
| ATP6VOE2-AS1 | ARL4D    | 0.531562024  | 0           |
| ATP6VOE2-AS1 | FAM189A2 | 0.424212166  | 0           |
| ATP6VOE2-AS1 | MAP1LC3A | 0.699239753  | 0           |
| ATP6VOE2-AS1 | KLF6     | -0.010369145 | 0.828418312 |
| ATP6VOE2-AS1 | ADD3     | 0.332392906  | 1.18E-12    |
| ATP6VOE2-AS1 | TSPAN7   | 0.465412732  | 0           |
| ATP6VOE2-AS1 | KLF9     | 0.329535739  | 1.88E-12    |
| ATP6VOE2-AS1 | KCNQ1    | 0.628608266  | 0           |
| ATP6VOE2-AS1 | MAN1A1   | 0.20143213   | 2.20E-05    |
| ATP6VOE2-AS1 | MLF1     | 0.36843826   | 1.54E-15    |
| ATP6VOE2-AS1 | RARB     | 0.532262558  | 0           |



|              |          |              |             |
|--------------|----------|--------------|-------------|
| ATP6VOE2-AS1 | CDC42EP2 | 0.511456469  | 0           |
| ATP6VOE2-AS1 | FAM3B    | 0.257745868  | 4.82E-08    |
| ATP6VOE2-AS1 | GADD45B  | 0.288411481  | 8.88E-10    |
| ATP6VOE2-AS1 | TMEM47   | 0.389339238  | 0           |
| ATP6VOE2-AS1 | SDF2L1   | 0.529155899  | 0           |
| ATP6VOE2-AS1 | CCDC85A  | 0.267345121  | 1.45E-08    |
| ATP6VOE2-AS1 | CRYBG3   | 0.147620824  | 0.001945908 |
| ATP6VOE2-AS1 | FBLN2    | 0.168753989  | 0.000390338 |
| ATP6VOE2-AS1 | PEBP4    | 0.365796118  | 2.73E-15    |
| ATP6VOE2-AS1 | CDADC1   | 0.623505959  | 0           |
| ATP6VOE2-AS1 | FAM63A   | 0.517355475  | 0           |
| ATP6VOE2-AS1 | GLUL     | 0.326743107  | 2.95E-12    |
| ATP6VOE2-AS1 | FREM2    | 0.441350772  | 0           |
| ATP6VOE2-AS1 | ACKR3    | 0.464138183  | 0           |
| ATP6VOE2-AS1 | DENND6A  | 0.589772692  | 0           |
| ATP6VOE2-AS1 | CLDN8    | 0.221906603  | 2.83E-06    |
| ATP6VOE2-AS1 | UTS2R    | 0.213554567  | 6.37E-06    |
| ATP6VOE2-AS1 | SCNN1B   | 0.486674969  | 0           |
| ATP6VOE2-AS1 | TTC30A   | 0.577461371  | 0           |
| ATP6VOE2-AS1 | CORO2B   | 0.53229901   | 0           |
| ATP6VOE2-AS1 | TC2N     | 0.358826383  | 1.11E-14    |
| ATP6VOE2-AS1 | ALDH2    | 0.624942201  | 0           |
| ATP6VOE2-AS1 | GPR183   | 0.010767708  | 0.821931394 |
| ATP6VOE2-AS1 | C4orf47  | 0.555364422  | 0           |
| ATP6VOE2-AS1 | SLC25A42 | 0.613934789  | 0           |
| ATP6VOE2-AS1 | LGMN     | 0.588107949  | 0           |
| ATP6VOE2-AS1 | ACSF2    | 0.728257219  | 0           |
| ATP6VOE2-AS1 | KIAA1467 | 0.561320163  | 0           |
| ATP6VOE2-AS1 | PRKG1    | 0.482003847  | 0           |
| ATP6VOE2-AS1 | GNAI1    | 0.528404446  | 0           |
| ATP6VOE2-AS1 | ABCC4    | 0.375497068  | 2.72E-16    |
| ATP6VOE2-AS1 | PRPS1    | 0.663716218  | 0           |
| ATP6VOE2-AS1 | TSPAN5   | 0.447643518  | 0           |
| ATP6VOE2-AS1 | CR2      | 0.247742272  | 1.45E-07    |
| ATP6VOE2-AS1 | CCDC170  | 0.434752792  | 0           |
| ATP6VOE2-AS1 | RRAD     | 0.096562152  | 0.043191679 |
| ATP6VOE2-AS1 | SCGB2A1  | 0.602065007  | 0           |
| ATP6VOE2-AS1 | SESN3    | 0.252206986  | 9.42E-08    |
| ATP6VOE2-AS1 | SGK223   | 0.336912121  | 5.57E-13    |
| ATP6VOE2-AS1 | NDRG2    | 0.650648338  | 0           |
| ATP6VOE2-AS1 | C3orf52  | 0.268764627  | 1.21E-08    |
| ATP6VOE2-AS1 | FLRT3    | -0.387430819 | 0           |
| ATP6VOE2-AS1 | MST1R    | -0.544245951 | 0           |
| ATP6VOE2-AS1 | SDC1     | -0.261354772 | 3.09E-08    |
| ATP6VOE2-AS1 | ST8SIA4  | -0.461086274 | 0           |
| ATP6VOE2-AS1 | UBTD1    | -0.306768752 | 6.41E-11    |
| ATP6VOE2-AS1 | EPHA2    | -0.462431457 | 0           |
| ATP6VOE2-AS1 | TMEM130  | -0.371254436 | 8.10E-16    |
| ATP6VOE2-AS1 | SPINK2   | -0.340104874 | 3.25E-13    |
| ATP6VOE2-AS1 | MMP16    | -0.569255242 | 0           |
| ATP6VOE2-AS1 | SIGLEC15 | -0.595332849 | 0           |

|              |          |              |             |
|--------------|----------|--------------|-------------|
| ATP6VOE2-AS1 | RIN1     | -0.51462738  | 0           |
| ATP6VOE2-AS1 | IL1RN    | -0.421615411 | 0           |
| ATP6VOE2-AS1 | FCER1G   | -0.256381394 | 5.69E-08    |
| ATP6VOE2-AS1 | CD276    | -0.596284718 | 0           |
| ATP6VOE2-AS1 | CTSB     | -0.376120301 | 2.27E-16    |
| ATP6VOE2-AS1 | FAM171A2 | -0.27143542  | 8.60E-09    |
| ATP6VOE2-AS1 | ASPHD1   | -0.447483951 | 0           |
| ATP6VOE2-AS1 | C15orf48 | -0.290636622 | 6.52E-10    |
| ATP6VOE2-AS1 | DYSF     | -0.279223981 | 3.09E-09    |
| ATP6VOE2-AS1 | PDZRN4   | -0.264791202 | 2.01E-08    |
| ATP6VOE2-AS1 | EFHD2    | -0.279442694 | 3.00E-09    |
| ATP6VOE2-AS1 | ASF1B    | -0.264603551 | 2.06E-08    |
| ATP6VOE2-AS1 | AQP1     | -0.191870747 | 5.37E-05    |
| ATP6VOE2-AS1 | ARRDC2   | -0.419032132 | 0           |
| ATP6VOE2-AS1 | PRSS1    | -0.416136471 | 8.19E-20    |
| ATP6VOE2-AS1 | MAPK13   | -0.582892598 | 0           |
| ATP6VOE2-AS1 | CST5     | -0.512125343 | 1.01E-30    |
| ATP6VOE2-AS1 | AHR      | -0.572764718 | 0           |
| ATP6VOE2-AS1 | BAX      | -0.279879836 | 2.83E-09    |
| ATP6VOE2-AS1 | C1orf115 | -0.358760003 | 1.13E-14    |
| ATP6VOE2-AS1 | PLK3     | -0.480999072 | 0           |
| ATP6VOE2-AS1 | JAG2     | -0.228092971 | 1.47E-06    |
| ATP6VOE2-AS1 | RAD23B   | -0.613345598 | 0           |
| ATP6VOE2-AS1 | CA12     | -0.010392123 | 0.828044011 |
| ATP6VOE2-AS1 | ADTRP    | -0.395962464 | 0           |
| ATP6VOE2-AS1 | UCP2     | -0.41960331  | 0           |
| ATP6VOE2-AS1 | IGFBP2   | -0.269073123 | 1.17E-08    |
| ATP6VOE2-AS1 | LOXL2    | -0.332349078 | 1.19E-12    |
| ATP6VOE2-AS1 | GPX1     | -0.274941209 | 5.45E-09    |
| ATP6VOE2-AS1 | P3H3     | -0.385555307 | 0           |
| ATP6VOE2-AS1 | C2orf81  | -0.394045535 | 0           |
| ATP6VOE2-AS1 | CDT1     | -0.289086909 | 8.09E-10    |
| ATP6VOE2-AS1 | SNX25    | -0.488478144 | 0           |
| ATP6VOE2-AS1 | MTHFD1L  | -0.476630489 | 0           |
| ATP6VOE2-AS1 | CDC42BPG | -0.593985063 | 3.27E-43    |
| ATP6VOE2-AS1 | MSN      | -0.634128141 | 0           |
| ATP6VOE2-AS1 | SIGLEC6  | -0.463826783 | 8.40E-25    |
| ATP6VOE2-AS1 | F2R      | -0.25441851  | 7.22E-08    |
| ATP6VOE2-AS1 | TMEM184A | -0.520358734 | 0           |
| ATP6VOE2-AS1 | CKS2     | -0.215435142 | 5.53E-06    |
| ATP6VOE2-AS1 | TAX1BP3  | -0.46966969  | 0           |
| ATP6VOE2-AS1 | PMEPA1   | -0.463689978 | 0           |
| ATP6VOE2-AS1 | CXCL16   | -0.499202733 | 0           |
| ATP6VOE2-AS1 | FAXC     | -0.603646491 | 0           |
| ATP6VOE2-AS1 | VTCN1    | -0.500490747 | 3.30E-29    |
| ATP6VOE2-AS1 | SH2D4A   | -0.640713356 | 0           |
| ATP6VOE2-AS1 | RNF24    | -0.524190465 | 0           |
| ATP6VOE2-AS1 | LY6G6C   | -0.461584357 | 1.50E-24    |
| ATP6VOE2-AS1 | NID1     | -0.4063031   | 0           |
| ATP6VOE2-AS1 | STAC     | -0.603307784 | 0           |
| ATP6VOE2-AS1 | RAB34    | -0.480110888 | 0           |

|              |          |              |             |
|--------------|----------|--------------|-------------|
| ATP6VOE2-AS1 | HES4     | -0.254551554 | 7.11E-08    |
| ATP6VOE2-AS1 | EPHA10   | -0.519927124 | 0           |
| ATP6VOE2-AS1 | ENTPD2   | -0.497116877 | 0           |
| ATP6VOE2-AS1 | DDB2     | -0.40144376  | 0           |
| ATP6VOE2-AS1 | NKAIN4   | -0.259811158 | 3.74E-08    |
| ATP6VOE2-AS1 | TRIM29   | -0.491273754 | 0           |
| ATP6VOE2-AS1 | ADCY8    | -0.545430997 | 2.16E-35    |
| ATP6VOE2-AS1 | SFTA2    | -0.325758616 | 3.45E-12    |
| ATP6VOE2-AS1 | NRIP1    | -0.616287158 | 0           |
| ATP6VOE2-AS1 | VWA1     | -0.145279377 | 0.002297442 |
| ATP6VOE2-AS1 | APLNR    | -0.173887359 | 0.000256512 |
| ATP6VOE2-AS1 | REN      | -0.510371777 | 1.72E-30    |
| ATP6VOE2-AS1 | EDIL3    | -0.293427409 | 4.41E-10    |
| ATP6VOE2-AS1 | AGRN     | -0.477147627 | 0           |
| ATP6VOE2-AS1 | TREM1    | -0.486380089 | 0           |
| ATP6VOE2-AS1 | SRL      | -0.346897455 | 1.00E-13    |
| ATP6VOE2-AS1 | RASGRF1  | -0.589583623 | 0           |
| ATP6VOE2-AS1 | RMI2     | -0.377018555 | 1.73E-16    |
| ATP6VOE2-AS1 | SAMD1    | -0.420570781 | 0           |
| ATP6VOE2-AS1 | MGAT4B   | -0.558872905 | 0           |
| ATP6VOE2-AS1 | NXN      | -0.516815927 | 0           |
| ATP6VOE2-AS1 | SH3BGRL3 | -0.385613176 | 0           |
| ATP6VOE2-AS1 | CA11     | -0.305846527 | 7.35E-11    |
| ATP6VOE2-AS1 | PLD3     | -0.313132558 | 2.47E-11    |
| ATP6VOE2-AS1 | LURAP1L  | -0.432972027 | 0           |
| ATP6VOE2-AS1 | CARNS1   | -0.309888601 | 4.03E-11    |
| ATP6VOE2-AS1 | PDLIM7   | -0.388527929 | 0           |
| ATP6VOE2-AS1 | BCL2L1   | -0.565348196 | 0           |
| ATP6VOE2-AS1 | GGT6     | -0.351814948 | 4.14E-14    |
| ATP6VOE2-AS1 | DPYSL3   | -0.394123829 | 0           |
| ATP6VOE2-AS1 | FYN      | -0.620083854 | 0           |
| ATP6VOE2-AS1 | TK1      | -0.211436753 | 8.28E-06    |
| ATP6VOE2-AS1 | AK1      | -0.243205009 | 2.71E-07    |
| ATP6VOE2-AS1 | HIGD1B   | -0.105815748 | 0.026664005 |
| ATP6VOE2-AS1 | TMEM59L  | -0.342931972 | 2.00E-13    |
| ATP6VOE2-AS1 | MEGF9    | -0.489821342 | 0           |
| ATP6VOE2-AS1 | ZFP36L1  | -0.569902444 | 0           |
| ATP6VOE2-AS1 | ADRA1B   | -0.405087131 | 0           |
| ATP6VOE2-AS1 | EPHA4    | -0.586633836 | 0           |
| ATP6VOE2-AS1 | TCERG1L  | -0.310064195 | 3.92E-11    |
| ATP6VOE2-AS1 | NGFR     | -0.325504018 | 3.60E-12    |
| ATP6VOE2-AS1 | EBI3     | -0.39715886  | 0           |
| ATP6VOE2-AS1 | S100A10  | -0.44706383  | 0           |
| ATP6VOE2-AS1 | S100B    | -0.363882167 | 4.07E-15    |
| ATP6VOE2-AS1 | CD44     | -0.42092892  | 0           |
| ATP6VOE2-AS1 | BHLHE41  | -0.50215252  | 0           |
| ATP6VOE2-AS1 | FBXO2    | -0.360221493 | 8.48E-15    |
| ATP6VOE2-AS1 | SLC30A2  | -0.254793244 | 6.90E-08    |
| ATP6VOE2-AS1 | FRMD5    | -0.453029925 | 0           |
| ATP6VOE2-AS1 | SAMD11   | -0.301195545 | 1.45E-10    |
| ATP6VOE2-AS1 | SIPA1L2  | -0.58627357  | 0           |

|              |          |              |          |
|--------------|----------|--------------|----------|
| ATP6VOE2-AS1 | S100A16  | -0.488502398 | 0        |
| ATP6VOE2-AS1 | PPL      | -0.569621323 | 0        |
| ATP6VOE2-AS1 | ARHGDIB  | -0.247345093 | 1.68E-07 |
| ATP6VOE2-AS1 | CDC42EP3 | -0.482132918 | 0        |
| ATP6VOE2-AS1 | RUNX2    | -0.56998159  | 0        |
| ATP6VOE2-AS1 | LAMC2    | -0.537201752 | 0        |
| ATP6VOE2-AS1 | BRINP1   | -0.480525195 | 0        |
| ATP6VOE2-AS1 | GPRC5B   | -0.507297379 | 0        |
| ATP6VOE2-AS1 | AQP5     | -0.241016462 | 3.49E-07 |
| ATP6VOE2-AS1 | PLAG1    | -0.48730813  | 0        |
| ATP6VOE2-AS1 | PTPRU    | -0.542331008 | 0        |
| ATP6VOE2-AS1 | ANGPTL4  | -0.435628211 | 0        |
| ATP6VOE2-AS1 | PALM3    | -0.345274129 | 1.33E-13 |
| ATP6VOE2-AS1 | ACP5     | -0.30187608  | 1.32E-10 |
| ATP6VOE2-AS1 | DLG4     | -0.384165728 | 0        |
| ATP6VOE2-AS1 | ETNK2    | -0.503483094 | 0        |
| ATP6VOE2-AS1 | CD109    | -0.586263499 | 0        |
| ATP6VOE2-AS1 | SNX22    | -0.357708423 | 1.38E-14 |
| ATP6VOE2-AS1 | TMEM98   | -0.535676577 | 0        |
| ATP6VOE2-AS1 | CTHRC1   | -0.320028821 | 8.53E-12 |
| ATP6VOE2-AS1 | S100A2   | -0.403659114 | 0        |
| ATP6VOE2-AS1 | C11orf80 | -0.550016311 | 0        |
| ATP6VOE2-AS1 | SREBF1   | -0.436489304 | 0        |
| ATP6VOE2-AS1 | PRSS22   | -0.492940766 | 0        |
| ATP6VOE2-AS1 | CMTM3    | -0.453239418 | 0        |
| ATP6VOE2-AS1 | RDH5     | -0.49007523  | 0        |
| ATP6VOE2-AS1 | MYH10    | -0.564657024 | 0        |
| ATP6VOE2-AS1 | EVPL     | -0.523984092 | 0        |
| ATP6VOE2-AS1 | SCD      | -0.438104403 | 0        |
| ATP6VOE2-AS1 | CD151    | -0.489808151 | 0        |
| ATP6VOE2-AS1 | S100A4   | -0.460912665 | 0        |
| ATP6VOE2-AS1 | BNIP1    | -0.417895591 | 0        |
| ATP6VOE2-AS1 | MAP3K6   | -0.463696361 | 0        |
| ATP6VOE2-AS1 | MANEAL   | -0.397128791 | 0        |
| ATP6VOE2-AS1 | CD207    | -0.418922931 | 4.39E-20 |
| ATP6VOE2-AS1 | CD1A     | -0.429135042 | 4.27E-21 |
| ATP6VOE2-AS1 | C3       | -0.40233081  | 0        |
| ATP6VOE2-AS1 | NT5E     | -0.529867921 | 0        |
| ATP6VOE2-AS1 | CACNG4   | -0.480818004 | 8.88E-27 |
| ATP6VOE2-AS1 | FHOD1    | -0.404219371 | 0        |
| ATP6VOE2-AS1 | LEMD1    | -0.53934406  | 0        |
| ATP6VOE2-AS1 | ATP11A   | -0.425114533 | 0        |
| ATP6VOE2-AS1 | PPAP2C   | -0.388718275 | 0        |
| ATP6VOE2-AS1 | DRAM1    | -0.558955455 | 0        |
| ATP6VOE2-AS1 | CDA      | -0.231872222 | 9.71E-07 |
| ATP6VOE2-AS1 | CCND2    | -0.403736699 | 0        |
| ATP6VOE2-AS1 | LCN6     | -0.26735669  | 1.27E-08 |
| ATP6VOE2-AS1 | CDH4     | -0.44341975  | 0        |
| ATP6VOE2-AS1 | MMP11    | -0.423440713 | 0        |
| ATP6VOE2-AS1 | B3GAT1   | -0.350126944 | 5.62E-14 |
| ATP6VOE2-AS1 | SPP1     | -0.240596056 | 3.66E-07 |

|              |          |              |             |
|--------------|----------|--------------|-------------|
| ATP6VOE2-AS1 | HLA-DQB1 | -0.287993345 | 9.41E-10    |
| ATP6VOE2-AS1 | SDC3     | -0.5797397   | 0           |
| ATP6VOE2-AS1 | CX3CL1   | -0.390708959 | 0           |
| ATP6VOE2-AS1 | SDK1     | -0.469427999 | 0           |
| ATP6VOE2-AS1 | DOCK9    | -0.652164576 | 0           |
| ATP6VOE2-AS1 | CSF2     | -0.562319827 | 5.77E-38    |
| ATP6VOE2-AS1 | GRHL3    | -0.643691226 | 0           |
| ATP6VOE2-AS1 | TMEM92   | -0.585350127 | 1.01E-41    |
| ATP6VOE2-AS1 | BASP1    | -0.564236051 | 0           |
| ATP6VOE2-AS1 | HRH1     | -0.534579467 | 0           |
| ATP6VOE2-AS1 | ESM1     | -0.128774073 | 0.006932324 |
| ATP6VOE2-AS1 | B4GALNT3 | -0.521354289 | 0           |
| ATP6VOE2-AS1 | LMO3     | -0.376263414 | 2.18E-16    |
| ATP6VOE2-AS1 | C9orf16  | -0.365168063 | 3.12E-15    |
| ATP6VOE2-AS1 | SEMA3F   | -0.358636463 | 1.15E-14    |
| ATP6VOE2-AS1 | PLA2G12B | -0.395430333 | 6.98E-18    |
| ATP6VOE2-AS1 | KLK6     | -0.487612947 | 1.34E-27    |
| ATP6VOE2-AS1 | ST3GAL5  | -0.55387726  | 0           |
| ATP6VOE2-AS1 | FAM132B  | -0.201964586 | 2.09E-05    |
| ATP6VOE2-AS1 | CDKN1A   | -0.309056301 | 4.56E-11    |
| ATP6VOE2-AS1 | E2F1     | -0.300439695 | 1.62E-10    |
| ATP6VOE2-AS1 | B3GNT8   | -0.380691144 | 4.19E-17    |
| ATP6VOE2-AS1 | MTMR11   | -0.536976798 | 0           |
| ATP6VOE2-AS1 | MYO1G    | -0.424969718 | 0           |
| ATP6VOE2-AS1 | TMSB10   | -0.450775991 | 0           |
| ATP6VOE2-AS1 | UNC5CL   | -0.525045033 | 0           |
| ATP6VOE2-AS1 | ABR      | -0.496289966 | 0           |
| ATP6VOE2-AS1 | PLP2     | -0.512229623 | 0           |
| ATP6VOE2-AS1 | SRCIN1   | -0.389145488 | 0           |
| ATP6VOE2-AS1 | PDE9A    | -0.545203919 | 0           |
| ATP6VOE2-AS1 | TREM2    | -0.235376166 | 6.59E-07    |
| ATP6VOE2-AS1 | KDEL3    | -0.458558311 | 0           |
| ATP6VOE2-AS1 | PC       | -0.546276492 | 0           |
| ATP6VOE2-AS1 | C2CD4A   | -0.502680722 | 0           |
| ATP6VOE2-AS1 | PELI1    | -0.591512324 | 0           |
| ATP6VOE2-AS1 | SSX1     | -0.345622339 | 1.25E-13    |
| ATP6VOE2-AS1 | MROH6    | -0.544007098 | 0           |
| ATP6VOE2-AS1 | ESPN     | -0.515151184 | 0           |
| ATP6VOE2-AS1 | BMP1     | -0.468895968 | 0           |
| ATP6VOE2-AS1 | TM4SF4   | -0.524723151 | 1.99E-32    |
| ATP6VOE2-AS1 | CORO2A   | -0.650074039 | 0           |
| ATP6VOE2-AS1 | CD164L2  | -0.389890643 | 2.18E-17    |
| ATP6VOE2-AS1 | CTSS     | -0.393430813 | 0           |
| ATP6VOE2-AS1 | CLU      | -0.472339348 | 0           |
| ATP6VOE2-AS1 | TMSB4X   | -0.467137471 | 0           |
| ATP6VOE2-AS1 | WNT10A   | -0.46749357  | 3.21E-25    |
| ATP6VOE2-AS1 | NAPSA    | -0.440875759 | 0           |
| ATP6VOE2-AS1 | PLEKHA4  | -0.47511581  | 0           |
| ATP6VOE2-AS1 | SFTPA1   | -0.185749891 | 9.04E-05    |
| ATP6VOE2-AS1 | C1orf116 | -0.58793193  | 0           |
| ATP6VOE2-AS1 | TM4SF1   | -0.475864143 | 0           |

|              |          |              |          |
|--------------|----------|--------------|----------|
| ATP6VOE2-AS1 | SEL1L3   | -0.516994783 | 0        |
| ATP6VOE2-AS1 | VASN     | -0.543067852 | 0        |
| ATP6VOE2-AS1 | NPTXR    | -0.577689161 | 0        |
| ATP6VOE2-AS1 | PDE4C    | -0.461495758 | 0        |
| ATP6VOE2-AS1 | CDC42EP1 | -0.588395028 | 0        |
| ATP6VOE2-AS1 | ENDOD1   | -0.674184791 | 0        |
| ATP6VOE2-AS1 | RYR1     | -0.575754077 | 0        |
| ATP6VOE2-AS1 | IL1RAP   | -0.659611451 | 0        |
| ATP6VOE2-AS1 | SLC35F2  | -0.625043992 | 5.93E-49 |
| ATP6VOE2-AS1 | ISYNA1   | -0.419842447 | 0        |
| ATP6VOE2-AS1 | HLA-G    | -0.42358099  | 0        |
| ATP6VOE2-AS1 | CDKN2B   | -0.517149669 | 0        |
| ATP6VOE2-AS1 | ALDH1A3  | -0.455975882 | 0        |
| ATP6VOE2-AS1 | CLIP3    | -0.432946496 | 0        |
| ATP6VOE2-AS1 | ULBP2    | -0.445738503 | 0        |
| ATP6VOE2-AS1 | ETHE1    | -0.536578378 | 0        |
| ATP6VOE2-AS1 | XPR1     | -0.57669772  | 0        |
| ATP6VOE2-AS1 | SPTBN2   | -0.578684858 | 0        |
| ATP6VOE2-AS1 | IVL      | -0.550051772 | 4.42E-36 |
| ATP6VOE2-AS1 | MARCO    | -0.383836241 | 0        |
| ATP6VOE2-AS1 | PLXND1   | -0.384249838 | 0        |
| ATP6VOE2-AS1 | EMILIN2  | -0.480575547 | 0        |
| ATP6VOE2-AS1 | PLAUR    | -0.517603832 | 0        |
| ATP6VOE2-AS1 | CDC42EP5 | -0.503187648 | 0        |
| ATP6VOE2-AS1 | TRPC5    | -0.471131624 | 1.23E-25 |
| ATP6VOE2-AS1 | TMEM100  | -0.445687442 | 0        |
| ATP6VOE2-AS1 | QSOX1    | -0.605469382 | 0        |
| ATP6VOE2-AS1 | ARHGAP23 | -0.566134967 | 0        |
| ATP6VOE2-AS1 | MDF1     | -0.392619789 | 0        |
| ATP6VOE2-AS1 | FSTL3    | -0.512038994 | 0        |
| ATP6VOE2-AS1 | INF2     | -0.52214262  | 0        |
| ATP6VOE2-AS1 | TGFBR1   | -0.634071406 | 0        |
| ATP6VOE2-AS1 | TGFBI    | -0.324707177 | 4.08E-12 |
| ATP6VOE2-AS1 | ERBB3    | -0.65381939  | 0        |
| ATP6VOE2-AS1 | CCL18    | -0.341507218 | 2.56E-13 |
| ATP6VOE2-AS1 | CCL17    | -0.420349672 | 3.19E-20 |
| ATP6VOE2-AS1 | C16orf45 | -0.48610989  | 0        |
| ATP6VOE2-AS1 | PRDM1    | -0.435945075 | 0        |
| ATP6VOE2-AS1 | TRIM47   | -0.447149641 | 0        |
| ATP6VOE2-AS1 | CNFN     | -0.362546345 | 5.34E-15 |
| ATP6VOE2-AS1 | ARMCX3   | -0.475691527 | 0        |
| ATP6VOE2-AS1 | RAMP1    | -0.356777829 | 1.65E-14 |
| ATP6VOE2-AS1 | GABRD    | -0.188719835 | 7.14E-05 |
| ATP6VOE2-AS1 | COL13A1  | -0.294538703 | 3.77E-10 |
| ATP6VOE2-AS1 | S100A5   | -0.427082098 | 0        |
| ATP6VOE2-AS1 | MISP     | -0.435957415 | 0        |
| ATP6VOE2-AS1 | HES6     | -0.252621718 | 8.97E-08 |
| ATP6VOE2-AS1 | PSD3     | -0.650910311 | 0        |
| ATP6VOE2-AS1 | DOK7     | -0.522354667 | 0        |
| ATP6VOE2-AS1 | ZMAT3    | -0.565381244 | 0        |
| ATP6VOE2-AS1 | MFAP2    | -0.433873969 | 0        |

|              |           |              |          |
|--------------|-----------|--------------|----------|
| ATP6VOE2-AS1 | TMEM79    | -0.520906084 | 0        |
| ATP6VOE2-AS1 | SLC1A5    | -0.422334242 | 0        |
| ATP6VOE2-AS1 | BBC3      | -0.421678529 | 0        |
| ATP6VOE2-AS1 | HLA-DQB2  | -0.308598592 | 4.88E-11 |
| ATP6VOE2-AS1 | C1QL1     | -0.426680841 | 0        |
| ATP6VOE2-AS1 | TMEM215   | -0.294523215 | 3.10E-10 |
| ATP6VOE2-AS1 | PNP       | -0.435071358 | 0        |
| ATP6VOE2-AS1 | ARNTL     | -0.565519252 | 0        |
| ATP6VOE2-AS1 | CLDN2     | -0.341549781 | 1.86E-13 |
| ATP6VOE2-AS1 | MVP       | -0.546020759 | 0        |
| ATP6VOE2-AS1 | LGALS1    | -0.439263638 | 0        |
| ATP6VOE2-AS1 | BIRC7     | -0.431609136 | 2.40E-21 |
| ATP6VOE2-AS1 | COL8A1    | -0.657018385 | 0        |
| ATP6VOE2-AS1 | PERP      | -0.613811674 | 0        |
| ATP6VOE2-AS1 | GJA4      | -0.294598842 | 3.74E-10 |
| ATP6VOE2-AS1 | IGFL2     | -0.475561181 | 3.73E-26 |
| ATP6VOE2-AS1 | DAPK2     | -0.497870315 | 0        |
| ATP6VOE2-AS1 | MAMLD1    | -0.611202722 | 0        |
| ATP6VOE2-AS1 | ETV5      | -0.441092486 | 0        |
| ATP6VOE2-AS1 | RUNX1     | -0.655536329 | 0        |
| ATP6VOE2-AS1 | LONRF2    | -0.43131849  | 0        |
| ATP6VOE2-AS1 | SPOCK1    | -0.331220906 | 1.43E-12 |
| ATP6VOE2-AS1 | XKRX      | -0.561242578 | 0        |
| ATP6VOE2-AS1 | TGFB1     | -0.363607003 | 4.31E-15 |
| ATP6VOE2-AS1 | ERP27     | -0.328124317 | 2.36E-12 |
| ATP6VOE2-AS1 | TNFRSF10C | -0.477859933 | 0        |
| ATP6VOE2-AS1 | PALM      | -0.553732586 | 0        |
| ATP6VOE2-AS1 | TSC22D1   | -0.497508773 | 0        |
| ATP6VOE2-AS1 | TGM2      | -0.458764684 | 0        |
| ATP6VOE2-AS1 | UBE2QL1   | -0.379337309 | 7.71E-17 |
| ATP6VOE2-AS1 | ECE1      | -0.648428586 | 0        |
| ATP6VOE2-AS1 | COL8A2    | -0.647346369 | 0        |
| ATP6VOE2-AS1 | HIST3H2A  | -0.39612657  | 0        |
| ATP6VOE2-AS1 | TNFRSF21  | -0.561428385 | 0        |
| ATP6VOE2-AS1 | SOX4      | -0.62323661  | 0        |
| ATP6VOE2-AS1 | ELF3      | -0.603264665 | 0        |
| ATP6VOE2-AS1 | TPD52L1   | -0.510008595 | 0        |
| ATP6VOE2-AS1 | INHBB     | -0.491139434 | 0        |
| ATP6VOE2-AS1 | HPN       | -0.41254904  | 0        |
| ATP6VOE2-AS1 | MMP7      | -0.395737445 | 6.55E-18 |
| ATP6VOE2-AS1 | RAB27A    | -0.655308255 | 0        |
| ATP6VOE2-AS1 | IGF2BP2   | -0.617445542 | 0        |
| ATP6VOE2-AS1 | ITGB4     | -0.546050545 | 0        |
| ATP6VOE2-AS1 | PPP1R1B   | -0.555787664 | 0        |
| ATP6VOE2-AS1 | NPDC1     | -0.267769923 | 1.38E-08 |
| ATP6VOE2-AS1 | CCL13     | -0.507788953 | 3.76E-30 |
| ATP6VOE2-AS1 | SPINT1    | -0.605739581 | 0        |
| ATP6VOE2-AS1 | HEY2      | -0.445771835 | 0        |
| ATP6VOE2-AS1 | CST2      | -0.447047371 | 5.89E-23 |
| ATP6VOE2-AS1 | ADM       | -0.354969689 | 2.31E-14 |
| ATP6VOE2-AS1 | VSTM2L    | -0.410551973 | 0        |

|              |            |              |          |
|--------------|------------|--------------|----------|
| ATP6VOE2-AS1 | FAM84A     | -0.532430918 | 0        |
| ATP6VOE2-AS1 | P4HA2      | -0.507148733 | 0        |
| ATP6VOE2-AS1 | LPL        | -0.459165799 | 0        |
| ATP6VOE2-AS1 | TMEM173    | -0.476079877 | 0        |
| ATP6VOE2-AS1 | DHRS3      | -0.533690574 | 0        |
| ATP6VOE2-AS1 | SCN1B      | -0.487882712 | 0        |
| ATP6VOE2-AS1 | GLT1D1     | -0.426089238 | 0        |
| ATP6VOE2-AS1 | PHYHIP     | -0.496682713 | 0        |
| ATP6VOE2-AS1 | BHLHE40    | -0.582314754 | 0        |
| ATP6VOE2-AS1 | BID        | -0.561259599 | 0        |
| ATP6VOE2-AS1 | POSTN      | -0.31697677  | 1.37E-11 |
| ATP6VOE2-AS1 | ITGA3      | -0.628818468 | 0        |
| ATP6VOE2-AS1 | RSP04      | -0.484024884 | 0        |
| ATP6VOE2-AS1 | ADAMTS9    | -0.398226185 | 0        |
| ATP6VOE2-AS1 | ABTB2      | -0.642064071 | 0        |
| ATP6VOE2-AS1 | KCNQ3      | -0.656996968 | 0        |
| ATP6VOE2-AS1 | ANXA1      | -0.612124522 | 0        |
| ATP6VOE2-AS1 | S100A11    | -0.522279918 | 0        |
| ATP6VOE2-AS1 | CEACAM6    | -0.543839633 | 3.72E-35 |
| ATP6VOE2-AS1 | IER5L      | -0.469171274 | 0        |
| ATP6VOE2-AS1 | KRT80      | -0.563034832 | 0        |
| ATP6VOE2-AS1 | CDH6       | -0.543179194 | 0        |
| ATP6VOE2-AS1 | UNC5B      | -0.475974776 | 0        |
| ATP6VOE2-AS1 | PLEKHN1    | -0.575464588 | 0        |
| ATP6VOE2-AS1 | SYTL1      | -0.397003832 | 0        |
| ATP6VOE2-AS1 | TMEM163    | -0.480967301 | 0        |
| ATP6VOE2-AS1 | C4orf48    | -0.22842487  | 1.41E-06 |
| ATP6VOE2-AS1 | B3GNT7     | -0.538632889 | 0        |
| ATP6VOE2-AS1 | BAIAP3     | -0.55437369  | 0        |
| ATP6VOE2-AS1 | PHLDA2     | -0.490702718 | 0        |
| ATP6VOE2-AS1 | GAP43      | -0.534881818 | 7.43E-34 |
| ATP6VOE2-AS1 | S100A1     | -0.367510078 | 1.89E-15 |
| ATP6VOE2-AS1 | PTPRE      | -0.712155868 | 0        |
| ATP6VOE2-AS1 | CCND1      | -0.565000553 | 0        |
| ATP6VOE2-AS1 | ST6GALNAC5 | -0.56230321  | 5.80E-38 |
| ATP6VOE2-AS1 | KRT17      | -0.339740778 | 3.46E-13 |
| ATP6VOE2-AS1 | HPCAL4     | -0.495072294 | 0        |
| ATP6VOE2-AS1 | GABBR2     | -0.418097709 | 0        |
| ATP6VOE2-AS1 | DIRAS3     | -0.443468542 | 0        |
| ATP6VOE2-AS1 | SERINC2    | -0.410592255 | 0        |
| ATP6VOE2-AS1 | PTCHD4     | -0.443319613 | 0        |
| ATP6VOE2-AS1 | EPS8       | -0.593311245 | 0        |
| ATP6VOE2-AS1 | LY6E       | -0.511772907 | 0        |
| ATP6VOE2-AS1 | UPP1       | -0.530824045 | 0        |
| ATP6VOE2-AS1 | AHNAK2     | -0.600940948 | 0        |
| ATP6VOE2-AS1 | PLXNC1     | -0.501459504 | 0        |
| ATP6VOE2-AS1 | TNC        | -0.517489511 | 0        |
| ATP6VOE2-AS1 | DUSP4      | -0.530267476 | 0        |
| ATP6VOE2-AS1 | NRCAM      | -0.576811898 | 0        |
| ATP6VOE2-AS1 | NRP2       | -0.556328489 | 0        |
| ATP6VOE2-AS1 | CTSC       | -0.593165294 | 0        |



|              |         |              |             |
|--------------|---------|--------------|-------------|
| ATP6VOE2-AS1 | AMIG02  | -0.540010836 | 0           |
| ATP6VOE2-AS1 | NAB2    | -0.475139922 | 0           |
| ATP6VOE2-AS1 | TBC1D2  | -0.593213093 | 0           |
| ATP6VOE2-AS1 | PHLDA3  | -0.381996046 | 1.81E-17    |
| ATP6VOE2-AS1 | PTP4A3  | -0.35270994  | 3.52E-14    |
| ATP6VOE2-AS1 | CRABP2  | -0.302993614 | 1.12E-10    |
| ATP6VOE2-AS1 | GOS2    | -0.393018776 | 0           |
| ATP6VOE2-AS1 | S100A6  | -0.528768258 | 0           |
| ATP6VOE2-AS1 | FOXQ1   | -0.558330095 | 0           |
| ATP6VOE2-AS1 | LRG1    | -0.52557749  | 0           |
| ATP6VOE2-AS1 | LAMP5   | -0.352548246 | 3.62E-14    |
| ATP6VOE2-AS1 | ALDH3B1 | -0.542477668 | 0           |
| ATP6VOE2-AS1 | CDH2    | -0.153822369 | 0.001239204 |
| ATP6VOE2-AS1 | SCG5    | -0.286581924 | 1.14E-09    |
| ATP6VOE2-AS1 | ZCCHC16 | -0.440230519 | 3.10E-22    |
| ATP6VOE2-AS1 | GRB7    | -0.618640236 | 0           |
| ATP6VOE2-AS1 | TIAM1   | -0.511439874 | 0           |
| ATP6VOE2-AS1 | FXYD5   | -0.360416944 | 8.16E-15    |
| ATP6VOE2-AS1 | CLDN9   | -0.416544734 | 0           |
| ATP6VOE2-AS1 | FAM43A  | -0.515646479 | 0           |
| ATP6VOE2-AS1 | CHST2   | -0.569605296 | 0           |
| ATP6VOE2-AS1 | HMGA2   | -0.548317386 | 0           |
| ATP6VOE2-AS1 | GALNT7  | -0.648097255 | 0           |
| ATP6VOE2-AS1 | CBLN1   | -0.478410119 | 0           |
| ATP6VOE2-AS1 | STRA6   | -0.531426853 | 0           |
| ATP6VOE2-AS1 | MUC21   | -0.588901618 | 2.49E-42    |
| ATP6VOE2-AS1 | PRR36   | -0.552181171 | 0           |
| ATP6VOE2-AS1 | NFE2L3  | -0.560147028 | 0           |
| ATP6VOE2-AS1 | NR1D1   | -0.368477265 | 1.53E-15    |
| ATP6VOE2-AS1 | MUC1    | -0.471960501 | 0           |
| ATP6VOE2-AS1 | NAT8L   | -0.327081247 | 2.80E-12    |
| ATP6VOE2-AS1 | APOC1   | -0.293328549 | 4.47E-10    |
| ATP6VOE2-AS1 | EVA1A   | -0.608432359 | 0           |
| ATP6VOE2-AS1 | ENTPD1  | -0.442424053 | 0           |
| ATP6VOE2-AS1 | COL1A1  | -0.397859961 | 0           |
| ATP6VOE2-AS1 | FNDC4   | -0.449259894 | 0           |
| ATP6VOE2-AS1 | FRMD3   | -0.351037539 | 4.77E-14    |
| ATP6VOE2-AS1 | SHROOM4 | -0.631124173 | 0           |
| ATP6VOE2-AS1 | NELL2   | -0.510253264 | 0           |
| ATP6VOE2-AS1 | EPHB3   | -0.57120068  | 0           |
| ATP6VOE2-AS1 | TMC6    | -0.547723798 | 0           |
| ATP6VOE2-AS1 | NOD1    | -0.596608391 | 0           |
| ATP6VOE2-AS1 | GGCT    | -0.576013214 | 0           |
| ATP6VOE2-AS1 | ICAM1   | -0.592726734 | 0           |
| ATP6VOE2-AS1 | PRSS23  | -0.611420584 | 0           |
| ATP6VOE2-AS1 | CFI     | -0.541933864 | 0           |
| ATP6VOE2-AS1 | CD55    | -0.627297691 | 0           |
| ATP6VOE2-AS1 | RASD2   | -0.54545951  | 0           |
| ATP6VOE2-AS1 | KLK11   | -0.473734745 | 6.10E-26    |
| ATP6VOE2-AS1 | ICAM5   | -0.51530834  | 0           |
| ATP6VOE2-AS1 | ADORA1  | -0.453663937 | 0           |

|              |           |              |          |
|--------------|-----------|--------------|----------|
| ATP6VOE2-AS1 | ITGA2     | -0.619572531 | 0        |
| ATP6VOE2-AS1 | ABCC3     | -0.51107053  | 0        |
| ATP6VOE2-AS1 | MFGE8     | -0.559792436 | 0        |
| ATP6VOE2-AS1 | STK32A    | -0.415766332 | 0        |
| ATP6VOE2-AS1 | CYSLTR2   | -0.554747005 | 0        |
| ATP6VOE2-AS1 | LAD1      | -0.585545803 | 0        |
| ATP6VOE2-AS1 | MGAT3     | -0.544275595 | 0        |
| ATP6VOE2-AS1 | IGFBP6    | -0.461594334 | 0        |
| ATP6VOE2-AS1 | CYP2S1    | -0.546167419 | 0        |
| ATP6VOE2-AS1 | KCNJ2     | -0.550393173 | 0        |
| ATP6VOE2-AS1 | FAM20A    | -0.521397975 | 0        |
| ATP6VOE2-AS1 | TGFA      | -0.634096512 | 0        |
| ATP6VOE2-AS1 | MXRA8     | -0.596825118 | 0        |
| ATP6VOE2-AS1 | C8orf4    | -0.487286571 | 0        |
| ATP6VOE2-AS1 | CLDN10    | -0.583668407 | 1.94E-41 |
| ATP6VOE2-AS1 | PDE5A     | -0.652300456 | 0        |
| ATP6VOE2-AS1 | APOE      | -0.293285288 | 4.50E-10 |
| ATP6VOE2-AS1 | SPOCK2    | -0.508107978 | 0        |
| ATP6VOE2-AS1 | TENM1     | -0.368764627 | 1.44E-15 |
| ATP6VOE2-AS1 | SLIT1     | -0.357199795 | 1.52E-14 |
| ATP6VOE2-AS1 | CXCL14    | -0.34732254  | 9.28E-14 |
| ATP6VOE2-AS1 | ECM1      | -0.281265726 | 2.35E-09 |
| ATP6VOE2-AS1 | DUSP5     | -0.63256694  | 0        |
| ATP6VOE2-AS1 | SEZ6L2    | -0.423532908 | 0        |
| ATP6VOE2-AS1 | THRSP     | -0.252264146 | 9.36E-08 |
| ATP6VOE2-AS1 | C19orf33  | -0.508821844 | 0        |
| ATP6VOE2-AS1 | MPZL2     | -0.675998462 | 0        |
| ATP6VOE2-AS1 | CTSH      | -0.56188581  | 0        |
| ATP6VOE2-AS1 | CYP1B1    | -0.587360184 | 0        |
| ATP6VOE2-AS1 | ALOX5     | -0.482007251 | 0        |
| ATP6VOE2-AS1 | SYTL5     | -0.630411747 | 5.17E-50 |
| ATP6VOE2-AS1 | TNFRSF12A | -0.531439619 | 0        |
| ATP6VOE2-AS1 | DUSP6     | -0.599412936 | 0        |
| ATP6VOE2-AS1 | ALOX15B   | -0.544667349 | 0        |
| ATP6VOE2-AS1 | SDC4      | -0.690187282 | 0        |
| ATP6VOE2-AS1 | MDK       | -0.502266699 | 0        |
| ATP6VOE2-AS1 | KRT19     | -0.57224687  | 0        |
| ATP6VOE2-AS1 | MET       | -0.739096412 | 0        |
| ATP6VOE2-AS1 | TESC      | -0.404529852 | 0        |
| ATP6VOE2-AS1 | CXCL17    | -0.504883258 | 8.98E-30 |
| ATP6VOE2-AS1 | NPC2      | -0.468482655 | 0        |
| ATP6VOE2-AS1 | COMP      | -0.425143185 | 0        |
| ATP6VOE2-AS1 | TUSC3     | -0.570588227 | 0        |
| ATP6VOE2-AS1 | TMPRSS4   | -0.624482791 | 0        |
| ATP6VOE2-AS1 | LGALS3    | -0.591465802 | 0        |
| ATP6VOE2-AS1 | CRLF1     | -0.414780564 | 0        |
| ATP6VOE2-AS1 | CTXN1     | -0.509790308 | 0        |
| ATP6VOE2-AS1 | PCSK1N    | -0.298814242 | 2.05E-10 |
| ATP6VOE2-AS1 | NMU       | -0.442470355 | 1.80E-22 |
| ATP6VOE2-AS1 | GALE      | -0.526635169 | 0        |
| ATP6VOE2-AS1 | PCSK2     | -0.220315049 | 3.34E-06 |

|              |          |              |          |
|--------------|----------|--------------|----------|
| ATP6VOE2-AS1 | GJB3     | -0.558992616 | 0        |
| ATP6VOE2-AS1 | SLPI     | -0.476041297 | 0        |
| ATP6VOE2-AS1 | AGR2     | -0.378060491 | 1.23E-16 |
| ATP6VOE2-AS1 | MRC2     | -0.53047314  | 0        |
| ATP6VOE2-AS1 | GOLT1A   | -0.471885044 | 0        |
| ATP6VOE2-AS1 | SLC27A6  | -0.581765014 | 4.05E-41 |
| ATP6VOE2-AS1 | KCNN4    | -0.5885241   | 0        |
| ATP6VOE2-AS1 | ETV4     | -0.461321385 | 1.61E-24 |
| ATP6VOE2-AS1 | SYT12    | -0.649408114 | 0        |
| ATP6VOE2-AS1 | PVRL4    | -0.626028532 | 0        |
| ATP6VOE2-AS1 | PLCD3    | -0.563091425 | 0        |
| ATP6VOE2-AS1 | PLAU     | -0.517418876 | 0        |
| ATP6VOE2-AS1 | LRRK2    | -0.424575411 | 0        |
| ATP6VOE2-AS1 | SFN      | -0.510608566 | 0        |
| ATP6VOE2-AS1 | LPAR5    | -0.612495284 | 0        |
| ATP6VOE2-AS1 | NGEF     | -0.558150671 | 0        |
| ATP6VOE2-AS1 | DTX4     | -0.575949954 | 0        |
| ATP6VOE2-AS1 | CST6     | -0.519254958 | 0        |
| ATP6VOE2-AS1 | QPCT     | -0.535872029 | 0        |
| ATP6VOE2-AS1 | TIMP1    | -0.52738336  | 0        |
| ATP6VOE2-AS1 | CAMK2N1  | -0.595561632 | 0        |
| ATP6VOE2-AS1 | KLHDC8A  | -0.343520596 | 1.81E-13 |
| ATP6VOE2-AS1 | PDLIM4   | -0.574157558 | 0        |
| ATP6VOE2-AS1 | SCEL     | -0.629165402 | 0        |
| ATP6VOE2-AS1 | LCN2     | -0.532232772 | 0        |
| ATP6VOE2-AS1 | PROS1    | -0.64344599  | 0        |
| ATP6VOE2-AS1 | GABRB2   | -0.691045113 | 0        |
| ATP6VOE2-AS1 | TMPRSS6  | -0.57976282  | 0        |
| ATP6VOE2-AS1 | KLK7     | -0.467890279 | 2.90E-25 |
| ATP6VOE2-AS1 | PDZK1IP1 | -0.471319965 | 0        |
| ATP6VOE2-AS1 | CDH3     | -0.612331888 | 0        |
| ATP6VOE2-AS1 | LRP4     | -0.508802554 | 0        |
| ATP6VOE2-AS1 | IGSF1    | -0.419742168 | 0        |
| ATP6VOE2-AS1 | B3GNT3   | -0.591885356 | 0        |
| ATP6VOE2-AS1 | CLDN1    | -0.620317602 | 0        |
| ATP6VOE2-AS1 | GDF15    | -0.531186723 | 0        |
| ATP6VOE2-AS1 | ARHGAP36 | -0.38943706  | 2.39E-17 |
| ATP6VOE2-AS1 | LAMB3    | -0.608538312 | 0        |
| ATP6VOE2-AS1 | KLK10    | -0.550492033 | 0        |
| ATP6VOE2-AS1 | DPP4     | -0.629939265 | 0        |
| ATP6VOE2-AS1 | METTL7B  | -0.501825302 | 0        |
| ATP6VOE2-AS1 | LIPH     | -0.69063265  | 0        |
| ATP6VOE2-AS1 | CLDN16   | -0.572467143 | 0        |
| ATP6VOE2-AS1 | CHI3L1   | -0.500699683 | 0        |
| ATP6VOE2-AS1 | SLC22A31 | -0.544403654 | 3.07E-35 |
| ATP6VOE2-AS1 | TACSTD2  | -0.628676631 | 0        |
| ATP6VOE2-AS1 | SFTPB    | -0.507814091 | 0        |
| ATP6VOE2-AS1 | RXRG     | -0.497183824 | 0        |
| ATP6VOE2-AS1 | DCSTAMP  | -0.582010597 | 3.69E-41 |
| ATP6VOE2-AS1 | CITED1   | -0.438757847 | 0        |
| ATP6VOE2-AS1 | SERPINA1 | -0.610514387 | 0        |

|              |           |              |             |
|--------------|-----------|--------------|-------------|
| ATP6VOE2-AS1 | PRR15     | -0.502865961 | 0           |
| ATP6VOE2-AS1 | SLC34A2   | -0.603226795 | 0           |
| ATP6VOE2-AS1 | FN1       | -0.655180743 | 0           |
| ATP6VOE2-AS1 | ZCCHC12   | -0.479528505 | 0           |
| RP11-395N3.2 | TFF3      | 0.679184834  | 0           |
| RP11-395N3.2 | CCL21     | 0.404443192  | 1.05E-18    |
| RP11-395N3.2 | TPO       | 0.658253077  | 0           |
| RP11-395N3.2 | MT1G      | 0.609718538  | 0           |
| RP11-395N3.2 | DI01      | 0.609987745  | 0           |
| RP11-395N3.2 | DPT       | 0.340382429  | 2.28E-13    |
| RP11-395N3.2 | CDH16     | 0.604430425  | 0           |
| RP11-395N3.2 | CRABP1    | 0.54486574   | 2.62E-35    |
| RP11-395N3.2 | SLC26A7   | 0.692394835  | 0           |
| RP11-395N3.2 | MT1H      | 0.553004614  | 1.58E-36    |
| RP11-395N3.2 | SLC26A4   | 0.691938828  | 0           |
| RP11-395N3.2 | SLC5A8    | 0.612942124  | 1.22E-46    |
| RP11-395N3.2 | PKHD1L1   | 0.600827691  | 2.01E-44    |
| RP11-395N3.2 | TFCP2L1   | 0.623164557  | 0           |
| RP11-395N3.2 | WSCD2     | 0.680394587  | 5.73E-61    |
| RP11-395N3.2 | IPCEF1    | 0.64370541   | 0           |
| RP11-395N3.2 | SLC5A5    | 0.505428839  | 7.63E-30    |
| RP11-395N3.2 | MT1F      | 0.615082393  | 0           |
| RP11-395N3.2 | FOSB      | 0.431076799  | 0           |
| RP11-395N3.2 | SEMA3D    | 0.674744717  | 1.27E-59    |
| RP11-395N3.2 | BMP8A     | 0.668647044  | 0           |
| RP11-395N3.2 | MATN2     | 0.660152276  | 0           |
| RP11-395N3.2 | PLA2R1    | 0.587362312  | 0           |
| RP11-395N3.2 | COL23A1   | 0.678002054  | 0           |
| RP11-395N3.2 | HGD       | 0.714019891  | 0           |
| RP11-395N3.2 | TCEAL2    | 0.58049782   | 0           |
| RP11-395N3.2 | CHRD1     | 0.380198486  | 1.51E-16    |
| RP11-395N3.2 | TNFRSF11B | 0.559159558  | 0           |
| RP11-395N3.2 | FAM167A   | 0.676804665  | 0           |
| RP11-395N3.2 | KIT       | 0.615100123  | 0           |
| RP11-395N3.2 | SLC4A4    | 0.719509839  | 0           |
| RP11-395N3.2 | SMOC2     | 0.478385581  | 0           |
| RP11-395N3.2 | FHL1      | 0.735049941  | 0           |
| RP11-395N3.2 | OTOS      | 0.622049291  | 0           |
| RP11-395N3.2 | IGFBPL1   | 0.612728126  | 1.34E-46    |
| RP11-395N3.2 | HBB       | 0.365179268  | 3.11E-15    |
| RP11-395N3.2 | BEX1      | 0.630770147  | 0           |
| RP11-395N3.2 | FABP4     | 0.562091128  | 6.26E-38    |
| RP11-395N3.2 | LMOD1     | 0.662059702  | 0           |
| RP11-395N3.2 | SOD3      | 0.578612804  | 0           |
| RP11-395N3.2 | TMEM171   | 0.502185568  | 0           |
| RP11-395N3.2 | PI16      | 0.374311452  | 3.76E-16    |
| RP11-395N3.2 | ZMAT4     | 0.701405013  | 2.96E-66    |
| RP11-395N3.2 | MFAP4     | 0.357607718  | 1.41E-14    |
| RP11-395N3.2 | CWH43     | 0.553272982  | 1.44E-36    |
| RP11-395N3.2 | SPX       | 0.755303007  | 0           |
| RP11-395N3.2 | APOD      | 0.168715126  | 0.000391564 |

|              |            |             |             |
|--------------|------------|-------------|-------------|
| RP11-395N3.2 | DPP6       | 0.666385876 | 0           |
| RP11-395N3.2 | MMRN1      | 0.45579504  | 0           |
| RP11-395N3.2 | WDR72      | 0.595008184 | 0           |
| RP11-395N3.2 | MPPED2     | 0.753573728 | 0           |
| RP11-395N3.2 | PAPSS2     | 0.462527055 | 0           |
| RP11-395N3.2 | DCN        | 0.149877169 | 0.001654446 |
| RP11-395N3.2 | SORBS2     | 0.719089008 | 0           |
| RP11-395N3.2 | EGR2       | 0.421274151 | 0           |
| RP11-395N3.2 | EDN3       | 0.700998142 | 3.79E-66    |
| RP11-395N3.2 | DIO2       | 0.629704383 | 0           |
| RP11-395N3.2 | ITPR1      | 0.752811637 | 0           |
| RP11-395N3.2 | CFD        | 0.312719954 | 2.63E-11    |
| RP11-395N3.2 | CPXM1      | 0.511672912 | 0           |
| RP11-395N3.2 | ELMO1      | 0.718880224 | 0           |
| RP11-395N3.2 | GPC3       | 0.50130421  | 2.59E-29    |
| RP11-395N3.2 | MYOC       | 0.368407416 | 1.47E-15    |
| RP11-395N3.2 | DEPTOR     | 0.636044786 | 0           |
| RP11-395N3.2 | DGKI       | 0.592659077 | 0           |
| RP11-395N3.2 | CARTPT     | 0.656482463 | 1.82E-55    |
| RP11-395N3.2 | IYD        | 0.434710099 | 0           |
| RP11-395N3.2 | LYVE1      | 0.423439153 | 0           |
| RP11-395N3.2 | CLCNKB     | 0.688114616 | 0           |
| RP11-395N3.2 | NCAM1      | 0.404423475 | 0           |
| RP11-395N3.2 | HBA2       | 0.350875702 | 4.91E-14    |
| RP11-395N3.2 | GLT8D2     | 0.577039689 | 0           |
| RP11-395N3.2 | OGDHL      | 0.482931036 | 0           |
| RP11-395N3.2 | LIFR       | 0.598486881 | 0           |
| RP11-395N3.2 | CSGALNACT1 | 0.454518789 | 0           |
| RP11-395N3.2 | RAP1GAP    | 0.51041198  | 0           |
| RP11-395N3.2 | COL9A3     | 0.661557173 | 0           |
| RP11-395N3.2 | FBLN1      | 0.179314047 | 0.000162484 |
| RP11-395N3.2 | EFEMP1     | 0.429215187 | 0           |
| RP11-395N3.2 | AOX1       | 0.521225236 | 6.02E-32    |
| RP11-395N3.2 | GRIN2C     | 0.625420193 | 0           |
| RP11-395N3.2 | C11orf74   | 0.683188754 | 0           |
| RP11-395N3.2 | PPARGC1A   | 0.58464996  | 0           |
| RP11-395N3.2 | ANGPTL1    | 0.680754403 | 0           |
| RP11-395N3.2 | SCARA5     | 0.329838902 | 1.34E-12    |
| RP11-395N3.2 | LTF        | 0.536393848 | 0           |
| RP11-395N3.2 | CA4        | 0.67876474  | 1.41E-60    |
| RP11-395N3.2 | TG         | 0.660010014 | 0           |
| RP11-395N3.2 | FCGBP      | 0.665317417 | 0           |
| RP11-395N3.2 | PBX4       | 0.709363804 | 0           |
| RP11-395N3.2 | CYR61      | 0.449296488 | 0           |
| RP11-395N3.2 | FOS        | 0.447411189 | 0           |
| RP11-395N3.2 | KHDRBS2    | 0.682368652 | 0           |
| RP11-395N3.2 | MUM1L1     | 0.547478845 | 0           |
| RP11-395N3.2 | RGS16      | 0.597459413 | 0           |
| RP11-395N3.2 | MT1M       | 0.508640293 | 0           |
| RP11-395N3.2 | LRP2       | 0.611459731 | 0           |
| RP11-395N3.2 | MAFB       | 0.517662269 | 0           |

|              |          |             |             |
|--------------|----------|-------------|-------------|
| RP11-395N3.2 | KCNK2    | 0.539329734 | 0           |
| RP11-395N3.2 | TBC1D4   | 0.71586505  | 0           |
| RP11-395N3.2 | MIOX     | 0.710019187 | 1.47E-68    |
| RP11-395N3.2 | TPPP     | 0.548769563 | 0           |
| RP11-395N3.2 | FMOD     | 0.528006876 | 0           |
| RP11-395N3.2 | CITED2   | 0.430145638 | 0           |
| RP11-395N3.2 | RGS8     | 0.653659572 | 7.53E-55    |
| RP11-395N3.2 | ABI3BP   | 0.428687553 | 0           |
| RP11-395N3.2 | ADH1B    | 0.389328238 | 2.44E-17    |
| RP11-395N3.2 | OGN      | 0.255869373 | 5.43E-08    |
| RP11-395N3.2 | NR4A1    | 0.384696766 | 0           |
| RP11-395N3.2 | FOXJ1    | 0.726309065 | 3.73E-73    |
| RP11-395N3.2 | ALDH1A1  | 0.680458389 | 0           |
| RP11-395N3.2 | OCA2     | 0.568265635 | 6.59E-39    |
| RP11-395N3.2 | TMEM139  | 0.379421134 | 7.45E-17    |
| RP11-395N3.2 | ARHGAP24 | 0.661852194 | 0           |
| RP11-395N3.2 | SLC25A15 | 0.541064403 | 0           |
| RP11-395N3.2 | DES      | 0.265578052 | 1.60E-08    |
| RP11-395N3.2 | GDF10    | 0.521609851 | 5.34E-32    |
| RP11-395N3.2 | KIAA1324 | 0.710269576 | 0           |
| RP11-395N3.2 | JUN      | 0.465225791 | 0           |
| RP11-395N3.2 | C7       | 0.137317066 | 0.003970864 |
| RP11-395N3.2 | LGI3     | 0.691719123 | 0           |
| RP11-395N3.2 | CDON     | 0.790443581 | 0           |
| RP11-395N3.2 | BCL2     | 0.620414902 | 0           |
| RP11-395N3.2 | HLF      | 0.776091649 | 0           |
| RP11-395N3.2 | EGR1     | 0.495119668 | 0           |
| RP11-395N3.2 | IP6K3    | 0.527337405 | 0           |
| RP11-395N3.2 | SCUBE3   | 0.538395311 | 0           |
| RP11-395N3.2 | PKNOX2   | 0.708770357 | 0           |
| RP11-395N3.2 | SMAD9    | 0.496261882 | 0           |
| RP11-395N3.2 | IQGAP2   | 0.568559105 | 0           |
| RP11-395N3.2 | GNA14    | 0.684404724 | 0           |
| RP11-395N3.2 | LAYN     | 0.589828859 | 0           |
| RP11-395N3.2 | AVPR1A   | 0.628448557 | 0           |
| RP11-395N3.2 | PDLIM3   | 0.478665001 | 0           |
| RP11-395N3.2 | GPM6A    | 0.55197026  | 0           |
| RP11-395N3.2 | SDPR     | 0.600617701 | 0           |
| RP11-395N3.2 | CRYAB    | 0.200913289 | 2.31E-05    |
| RP11-395N3.2 | FOXA2    | 0.551274367 | 2.89E-36    |
| RP11-395N3.2 | C8orf88  | 0.629173487 | 0           |
| RP11-395N3.2 | ISM1     | 0.646905397 | 0           |
| RP11-395N3.2 | BMP2     | 0.340198203 | 3.20E-13    |
| RP11-395N3.2 | ID4      | 0.6233532   | 0           |
| RP11-395N3.2 | NUPR1    | 0.326784382 | 2.93E-12    |
| RP11-395N3.2 | SERTM1   | 0.463848909 | 8.35E-25    |
| RP11-395N3.2 | IRS1     | 0.873032364 | 0           |
| RP11-395N3.2 | FIBIN    | 0.257817921 | 4.78E-08    |
| RP11-395N3.2 | PODN     | 0.216553953 | 4.93E-06    |
| RP11-395N3.2 | TDRD9    | 0.406701521 | 0           |
| RP11-395N3.2 | EPHA3    | 0.443407268 | 0           |

|              |          |             |             |
|--------------|----------|-------------|-------------|
| RP11-395N3.2 | AIF1L    | 0.419231838 | 0           |
| RP11-395N3.2 | EBF4     | 0.736509445 | 0           |
| RP11-395N3.2 | ADM2     | 0.517867082 | 0           |
| RP11-395N3.2 | GSTM3    | 0.637509964 | 0           |
| RP11-395N3.2 | HSD17B6  | 0.395074422 | 0           |
| RP11-395N3.2 | AGR3     | 0.406532613 | 6.69E-19    |
| RP11-395N3.2 | EPHB1    | 0.487762009 | 0           |
| RP11-395N3.2 | TMOD1    | 0.453792158 | 0           |
| RP11-395N3.2 | WASF3    | 0.714686384 | 0           |
| RP11-395N3.2 | SELV     | 0.689521742 | 3.29E-63    |
| RP11-395N3.2 | ENPP1    | 0.337324583 | 5.20E-13    |
| RP11-395N3.2 | SYNE1    | 0.714588683 | 8.14E-70    |
| RP11-395N3.2 | PLCH1    | 0.680558101 | 0           |
| RP11-395N3.2 | CCDC146  | 0.742428167 | 0           |
| RP11-395N3.2 | SLC16A2  | 0.740828102 | 0           |
| RP11-395N3.2 | IER2     | 0.586120953 | 0           |
| RP11-395N3.2 | KCNAB1   | 0.747665361 | 0           |
| RP11-395N3.2 | SYNDIG1  | 0.567329235 | 0           |
| RP11-395N3.2 | C16orf89 | 0.696268123 | 0           |
| RP11-395N3.2 | CTGF     | 0.350573731 | 5.19E-14    |
| RP11-395N3.2 | NR4A3    | 0.202759725 | 1.94E-05    |
| RP11-395N3.2 | KIAA1456 | 0.626158455 | 0           |
| RP11-395N3.2 | AQP4     | 0.622604016 | 0           |
| RP11-395N3.2 | RNF150   | 0.685765793 | 0           |
| RP11-395N3.2 | C1S      | 0.084523441 | 0.076886621 |
| RP11-395N3.2 | PFKFB2   | 0.533144501 | 0           |
| RP11-395N3.2 | PROX1    | 0.60638877  | 0           |
| RP11-395N3.2 | TCF7L1   | 0.742193284 | 0           |
| RP11-395N3.2 | HSPB6    | 0.418300961 | 0           |
| RP11-395N3.2 | FHDC1    | 0.526621411 | 0           |
| RP11-395N3.2 | PRR15L   | 0.495930409 | 0           |
| RP11-395N3.2 | SLC1A1   | 0.421071041 | 0           |
| RP11-395N3.2 | BTBD11   | 0.792679786 | 0           |
| RP11-395N3.2 | TRIM58   | 0.53497732  | 0           |
| RP11-395N3.2 | LRIG1    | 0.561221303 | 0           |
| RP11-395N3.2 | ROR2     | 0.37833991  | 1.12E-16    |
| RP11-395N3.2 | GPR125   | 0.699907522 | 0           |
| RP11-395N3.2 | FLRT1    | 0.762219694 | 0           |
| RP11-395N3.2 | PGF      | 0.610127455 | 0           |
| RP11-395N3.2 | DUSP1    | 0.39514605  | 0           |
| RP11-395N3.2 | PLA2G7   | 0.41594221  | 0           |
| RP11-395N3.2 | PLSCR4   | 0.52263366  | 0           |
| RP11-395N3.2 | FAM46B   | 0.366286165 | 2.46E-15    |
| RP11-395N3.2 | GLDC     | 0.526521983 | 0           |
| RP11-395N3.2 | ZBTB16   | 0.53986517  | 0           |
| RP11-395N3.2 | OMD      | 0.178608602 | 0.000168636 |
| RP11-395N3.2 | HSD11B2  | 0.67408508  | 0           |
| RP11-395N3.2 | FGL2     | 0.210314822 | 9.26E-06    |
| RP11-395N3.2 | CLCNKA   | 0.7416405   | 8.53E-78    |
| RP11-395N3.2 | GATM     | 0.530562498 | 0           |
| RP11-395N3.2 | TNS3     | 0.448356249 | 0           |

|              |          |              |             |
|--------------|----------|--------------|-------------|
| RP11-395N3.2 | TOB1     | 0.381196226  | 3.16E-17    |
| RP11-395N3.2 | MARC2    | 0.640209125  | 0           |
| RP11-395N3.2 | LRRC2    | 0.558287544  | 0           |
| RP11-395N3.2 | SORD     | 0.361881555  | 6.10E-15    |
| RP11-395N3.2 | RIMS4    | 0.583921768  | 0           |
| RP11-395N3.2 | SLC29A4  | 0.635523819  | 0           |
| RP11-395N3.2 | SLC39A14 | 0.576444682  | 0           |
| RP11-395N3.2 | FAXDC2   | 0.678305869  | 0           |
| RP11-395N3.2 | HSPB8    | 0.19145871   | 5.57E-05    |
| RP11-395N3.2 | CCL19    | -0.017342644 | 0.71708303  |
| RP11-395N3.2 | KCNIP3   | 0.724054868  | 0           |
| RP11-395N3.2 | CGNL1    | 0.652206135  | 0           |
| RP11-395N3.2 | ATF3     | 0.129133489  | 0.006775892 |
| RP11-395N3.2 | SGCD     | 0.371152313  | 8.30E-16    |
| RP11-395N3.2 | STARD13  | 0.62870585   | 0           |
| RP11-395N3.2 | LDHD     | 0.622480192  | 0           |
| RP11-395N3.2 | RCAN1    | 0.357601477  | 1.41E-14    |
| RP11-395N3.2 | ID3      | 0.386795814  | 0           |
| RP11-395N3.2 | SYTL3    | 0.622646     | 0           |
| RP11-395N3.2 | MT1E     | 0.425121484  | 0           |
| RP11-395N3.2 | CAMK1D   | 0.651158809  | 0           |
| RP11-395N3.2 | PRKCQ    | 0.65086393   | 0           |
| RP11-395N3.2 | NUAK2    | 0.345179807  | 1.35E-13    |
| RP11-395N3.2 | LIPG     | 0.677515269  | 0           |
| RP11-395N3.2 | SLC25A25 | 0.309774706  | 4.10E-11    |
| RP11-395N3.2 | PRKX     | 0.296236919  | 2.96E-10    |
| RP11-395N3.2 | SRPX     | 0.33034804   | 1.65E-12    |
| RP11-395N3.2 | FAM189A1 | 0.685553463  | 0           |
| RP11-395N3.2 | PLEKHH1  | 0.669015253  | 0           |
| RP11-395N3.2 | WNT11    | 0.517656028  | 0           |
| RP11-395N3.2 | SNAI1    | 0.392122791  | 0           |
| RP11-395N3.2 | FDCSP    | 0.048665271  | 0.308988675 |
| RP11-395N3.2 | MT1X     | 0.490028992  | 0           |
| RP11-395N3.2 | ACACB    | 0.752318186  | 0           |
| RP11-395N3.2 | ARC      | 0.263240071  | 2.44E-08    |
| RP11-395N3.2 | KLK4     | 0.174276501  | 0.000243307 |
| RP11-395N3.2 | ZFPM2    | 0.519224179  | 0           |
| RP11-395N3.2 | AKAP12   | 0.42789525   | 0           |
| RP11-395N3.2 | GJB6     | 0.332420328  | 8.71E-13    |
| RP11-395N3.2 | ERO1LB   | 0.656133605  | 0           |
| RP11-395N3.2 | DNALI1   | 0.713170712  | 0           |
| RP11-395N3.2 | HKDC1    | 0.396378331  | 0           |
| RP11-395N3.2 | ZFP36L2  | 0.487201752  | 0           |
| RP11-395N3.2 | CAPSL    | 0.749505209  | 2.63E-80    |
| RP11-395N3.2 | CYP7B1   | 0.551730697  | 0           |
| RP11-395N3.2 | CPQ      | 0.623120587  | 0           |
| RP11-395N3.2 | RPS6KA6  | 0.71311684   | 2.08E-69    |
| RP11-395N3.2 | TLE1     | 0.51051694   | 0           |
| RP11-395N3.2 | TP53INP2 | 0.623389794  | 0           |
| RP11-395N3.2 | KATNAL2  | 0.751136966  | 0           |
| RP11-395N3.2 | SGPP2    | 0.206799672  | 1.31E-05    |



|              |          |             |             |
|--------------|----------|-------------|-------------|
| RP11-395N3.2 | CTH      | 0.536670856 | 0           |
| RP11-395N3.2 | KIF12    | 0.463076249 | 0           |
| RP11-395N3.2 | TMEM220  | 0.680293291 | 0           |
| RP11-395N3.2 | CENPJ    | 0.58598408  | 0           |
| RP11-395N3.2 | FAM155B  | 0.692574543 | 0           |
| RP11-395N3.2 | WFS1     | 0.584480465 | 0           |
| RP11-395N3.2 | SELENBP1 | 0.685906921 | 0           |
| RP11-395N3.2 | SNTA1    | 0.516459206 | 0           |
| RP11-395N3.2 | FRAS1    | 0.249272801 | 1.34E-07    |
| RP11-395N3.2 | FBLN7    | 0.552588102 | 0           |
| RP11-395N3.2 | AGPAT9   | 0.56117705  | 0           |
| RP11-395N3.2 | GPR83    | 0.6309317   | 0           |
| RP11-395N3.2 | PRTG     | 0.605517464 | 0           |
| RP11-395N3.2 | EGR3     | 0.283069327 | 1.84E-09    |
| RP11-395N3.2 | GRAMD2   | 0.429846788 | 0           |
| RP11-395N3.2 | HYOU1    | 0.593035655 | 0           |
| RP11-395N3.2 | FBLN5    | 0.326426527 | 3.10E-12    |
| RP11-395N3.2 | ITM2A    | 0.567723117 | 0           |
| RP11-395N3.2 | SRF      | 0.551876363 | 0           |
| RP11-395N3.2 | FGFR2    | 0.510875078 | 0           |
| RP11-395N3.2 | MT1A     | 0.272484103 | 6.51E-09    |
| RP11-395N3.2 | MAMDC2   | 0.358185421 | 1.26E-14    |
| RP11-395N3.2 | FHL2     | 0.379089661 | 8.50E-17    |
| RP11-395N3.2 | FTCDNL1  | 0.485177311 | 0           |
| RP11-395N3.2 | PKIA     | 0.496020759 | 0           |
| RP11-395N3.2 | DNAJB4   | 0.492372992 | 0           |
| RP11-395N3.2 | SLC25A33 | 0.598455677 | 0           |
| RP11-395N3.2 | EYA2     | 0.308331088 | 5.08E-11    |
| RP11-395N3.2 | LPAR1    | 0.203239844 | 1.85E-05    |
| RP11-395N3.2 | STX11    | 0.227354567 | 1.59E-06    |
| RP11-395N3.2 | ARHGEF28 | 0.535789905 | 0           |
| RP11-395N3.2 | OR2W3    | 0.563480059 | 0           |
| RP11-395N3.2 | ALDH1B1  | 0.412016953 | 2.03E-19    |
| RP11-395N3.2 | CXCL12   | 0.251364757 | 1.04E-07    |
| RP11-395N3.2 | OLFM2    | 0.6060051   | 0           |
| RP11-395N3.2 | TUB      | 0.517645106 | 0           |
| RP11-395N3.2 | HTRA3    | 0.257315392 | 5.08E-08    |
| RP11-395N3.2 | CKB      | 0.471592434 | 0           |
| RP11-395N3.2 | RGS2     | 0.061414201 | 0.198949797 |
| RP11-395N3.2 | SHANK2   | 0.72431287  | 0           |
| RP11-395N3.2 | CNTFR    | 0.645200043 | 4.85E-53    |
| RP11-395N3.2 | CYTH3    | 0.598231575 | 0           |
| RP11-395N3.2 | PLAC9    | 0.44271255  | 0           |
| RP11-395N3.2 | WVOX     | 0.722178789 | 0           |
| RP11-395N3.2 | NPR3     | 0.498189591 | 0           |
| RP11-395N3.2 | SDC2     | 0.52808205  | 0           |
| RP11-395N3.2 | KLF15    | 0.615799947 | 0           |
| RP11-395N3.2 | TMEM164  | 0.657606725 | 0           |
| RP11-395N3.2 | LONRF3   | 0.394512321 | 0           |
| RP11-395N3.2 | GBP1     | 0.167594329 | 0.000428479 |
| RP11-395N3.2 | ARHGAP6  | 0.396500736 | 0           |

|              |          |             |             |
|--------------|----------|-------------|-------------|
| RP11-395N3.2 | TMEM119  | 0.15571249  | 0.001076401 |
| RP11-395N3.2 | SH3RF1   | 0.511070246 | 0           |
| RP11-395N3.2 | CRELD2   | 0.564942825 | 0           |
| RP11-395N3.2 | PCP4     | 0.079643819 | 0.095582055 |
| RP11-395N3.2 | GCSH     | 0.703242113 | 0           |
| RP11-395N3.2 | IMPA2    | 0.542443769 | 0           |
| RP11-395N3.2 | C1R      | 0.071906887 | 0.132474012 |
| RP11-395N3.2 | SUCNR1   | 0.398805448 | 0           |
| RP11-395N3.2 | SFRP1    | 0.46897951  | 0           |
| RP11-395N3.2 | UGT8     | 0.45419767  | 0           |
| RP11-395N3.2 | TLE4     | 0.361593625 | 6.46E-15    |
| RP11-395N3.2 | ANTXR1   | 0.471845329 | 0           |
| RP11-395N3.2 | GPX3     | 0.428289132 | 0           |
| RP11-395N3.2 | DPY19L2  | 0.67450591  | 0           |
| RP11-395N3.2 | FAM46C   | 0.468387482 | 0           |
| RP11-395N3.2 | IL33     | 0.234310552 | 6.88E-07    |
| RP11-395N3.2 | PEG3     | 0.685985357 | 0           |
| RP11-395N3.2 | FAHD2A   | 0.636459802 | 0           |
| RP11-395N3.2 | PTGDS    | 0.113402616 | 0.017497981 |
| RP11-395N3.2 | CHCHD10  | 0.379545384 | 7.08E-17    |
| RP11-395N3.2 | CD36     | 0.594173331 | 0           |
| RP11-395N3.2 | ANKRD37  | 0.572357929 | 0           |
| RP11-395N3.2 | TSPAN33  | 0.526898135 | 0           |
| RP11-395N3.2 | PRDM16   | 0.669764437 | 0           |
| RP11-395N3.2 | UST      | 0.698694247 | 0           |
| RP11-395N3.2 | NEXN     | 0.571176    | 0           |
| RP11-395N3.2 | NUPR1L   | 0.346145344 | 8.40E-14    |
| RP11-395N3.2 | SLC24A3  | 0.577929575 | 0           |
| RP11-395N3.2 | MARC1    | 0.712499681 | 0           |
| RP11-395N3.2 | MYH11    | 0.32998749  | 1.75E-12    |
| RP11-395N3.2 | APOA1    | 0.612163832 | 1.70E-46    |
| RP11-395N3.2 | TMEM178B | 0.482496589 | 0           |
| RP11-395N3.2 | CAPN6    | 0.359359378 | 7.91E-15    |
| RP11-395N3.2 | PPM1L    | 0.675633799 | 0           |
| RP11-395N3.2 | FZD8     | 0.662673857 | 0           |
| RP11-395N3.2 | RCAN2    | 0.647025817 | 0           |
| RP11-395N3.2 | COPZ2    | 0.53667043  | 0           |
| RP11-395N3.2 | GAS1     | 0.254769415 | 6.92E-08    |
| RP11-395N3.2 | DACT1    | 0.474878233 | 0           |
| RP11-395N3.2 | WBSCR17  | 0.647724932 | 0           |
| RP11-395N3.2 | NCS1     | 0.455175637 | 0           |
| RP11-395N3.2 | SPIRE2   | 0.476611624 | 0           |
| RP11-395N3.2 | C15orf52 | 0.466211559 | 0           |
| RP11-395N3.2 | SPAG5    | 0.518961497 | 0           |
| RP11-395N3.2 | ARL4D    | 0.494764082 | 0           |
| RP11-395N3.2 | FAM189A2 | 0.597330767 | 0           |
| RP11-395N3.2 | MAP1LC3A | 0.638943512 | 0           |
| RP11-395N3.2 | KLF6     | 0.083833971 | 0.079332165 |
| RP11-395N3.2 | ADD3     | 0.474596828 | 0           |
| RP11-395N3.2 | TSPAN7   | 0.510029304 | 0           |
| RP11-395N3.2 | KLF9     | 0.505997158 | 0           |

|              |          |              |             |
|--------------|----------|--------------|-------------|
| RP11-395N3.2 | KCNQ1    | 0.663708984  | 0           |
| RP11-395N3.2 | MAN1A1   | 0.199090398  | 2.75E-05    |
| RP11-395N3.2 | MLF1     | 0.372787128  | 5.57E-16    |
| RP11-395N3.2 | RARB     | 0.672408707  | 0           |
| RP11-395N3.2 | CDC42EP2 | 0.486506183  | 0           |
| RP11-395N3.2 | FAM3B    | 0.211322149  | 8.38E-06    |
| RP11-395N3.2 | GADD45B  | 0.298268027  | 2.22E-10    |
| RP11-395N3.2 | TMEM47   | 0.588042846  | 0           |
| RP11-395N3.2 | SDF2L1   | 0.503787619  | 0           |
| RP11-395N3.2 | CCDC85A  | 0.347717415  | 8.66E-14    |
| RP11-395N3.2 | CRYBG3   | 0.192896229  | 4.89E-05    |
| RP11-395N3.2 | FBLN2    | 0.03146132   | 0.510729938 |
| RP11-395N3.2 | PEBP4    | 0.371075154  | 8.45E-16    |
| RP11-395N3.2 | CDADC1   | 0.762352312  | 0           |
| RP11-395N3.2 | FAM63A   | 0.660183764  | 0           |
| RP11-395N3.2 | GLUL     | 0.383952263  | 0           |
| RP11-395N3.2 | FREM2    | 0.444271198  | 0           |
| RP11-395N3.2 | ACKR3    | 0.551084912  | 0           |
| RP11-395N3.2 | DENND6A  | 0.683162798  | 0           |
| RP11-395N3.2 | CLDN8    | 0.040245151  | 0.400107482 |
| RP11-395N3.2 | UTS2R    | 0.200357822  | 2.35E-05    |
| RP11-395N3.2 | SCNN1B   | 0.445468304  | 0           |
| RP11-395N3.2 | TTC30A   | 0.592324767  | 0           |
| RP11-395N3.2 | CORO2B   | 0.716555372  | 0           |
| RP11-395N3.2 | TC2N     | 0.234192252  | 7.52E-07    |
| RP11-395N3.2 | ALDH2    | 0.616307866  | 0           |
| RP11-395N3.2 | GPR183   | 0.01768553   | 0.711628865 |
| RP11-395N3.2 | C4orf47  | 0.68121197   | 0           |
| RP11-395N3.2 | SLC25A42 | 0.756056304  | 0           |
| RP11-395N3.2 | LGMN     | 0.531930942  | 0           |
| RP11-395N3.2 | ACSF2    | 0.625398208  | 0           |
| RP11-395N3.2 | KIAA1467 | 0.598278806  | 0           |
| RP11-395N3.2 | PRKG1    | 0.70932721   | 0           |
| RP11-395N3.2 | GNAI1    | 0.624038557  | 0           |
| RP11-395N3.2 | ABCC4    | 0.403864494  | 0           |
| RP11-395N3.2 | PRPS1    | 0.601625454  | 0           |
| RP11-395N3.2 | TSPAN5   | 0.338947625  | 3.96E-13    |
| RP11-395N3.2 | CR2      | 0.217262177  | 4.34E-06    |
| RP11-395N3.2 | CCDC170  | 0.477971275  | 0           |
| RP11-395N3.2 | RRAD     | 0.000864072  | 0.985592054 |
| RP11-395N3.2 | SCGB2A1  | 0.450264952  | 0           |
| RP11-395N3.2 | SESN3    | 0.39983093   | 0           |
| RP11-395N3.2 | SGK223   | 0.285827634  | 1.27E-09    |
| RP11-395N3.2 | NDRG2    | 0.727658099  | 0           |
| RP11-395N3.2 | C3orf52  | 0.259557837  | 3.86E-08    |
| RP11-395N3.2 | FLRT3    | -0.238349782 | 4.72E-07    |
| RP11-395N3.2 | MST1R    | -0.602643419 | 0           |
| RP11-395N3.2 | SDC1     | -0.504475671 | 0           |
| RP11-395N3.2 | ST8SIA4  | -0.563631683 | 0           |
| RP11-395N3.2 | UBTD1    | -0.348495534 | 7.54E-14    |
| RP11-395N3.2 | EPHA2    | -0.40668833  | 0           |

|              |          |              |             |
|--------------|----------|--------------|-------------|
| RP11-395N3.2 | TMEM130  | -0.138345101 | 0.003705627 |
| RP11-395N3.2 | SPINK2   | -0.478714076 | 0           |
| RP11-395N3.2 | MMP16    | -0.581627836 | 0           |
| RP11-395N3.2 | SIGLEC15 | -0.50756233  | 0           |
| RP11-395N3.2 | RIN1     | -0.515333587 | 0           |
| RP11-395N3.2 | IL1RN    | -0.680191877 | 0           |
| RP11-395N3.2 | FCER1G   | -0.335050225 | 7.61E-13    |
| RP11-395N3.2 | CD276    | -0.580364777 | 0           |
| RP11-395N3.2 | CTSB     | -0.535072635 | 0           |
| RP11-395N3.2 | FAM171A2 | -0.040013673 | 0.402824936 |
| RP11-395N3.2 | ASPHD1   | -0.622354667 | 0           |
| RP11-395N3.2 | C15orf48 | -0.515625771 | 0           |
| RP11-395N3.2 | DYSF     | -0.135428362 | 0.004503362 |
| RP11-395N3.2 | PDZRN4   | 0.007685019  | 0.872387586 |
| RP11-395N3.2 | EFHD2    | -0.136956941 | 0.004067769 |
| RP11-395N3.2 | ASF1B    | -0.468144373 | 0           |
| RP11-395N3.2 | AQP1     | -0.141018164 | 0.003089465 |
| RP11-395N3.2 | ARRDC2   | -0.418308621 | 0           |
| RP11-395N3.2 | PRSS1    | -0.348980351 | 5.11E-14    |
| RP11-395N3.2 | MAPK13   | -0.483865033 | 0           |
| RP11-395N3.2 | CST5     | -0.679129215 | 1.15E-60    |
| RP11-395N3.2 | AHR      | -0.549393363 | 0           |
| RP11-395N3.2 | BAX      | -0.511589654 | 0           |
| RP11-395N3.2 | C1orf115 | -0.266883441 | 1.54E-08    |
| RP11-395N3.2 | PLK3     | -0.458146983 | 0           |
| RP11-395N3.2 | JAG2     | -0.264121447 | 2.19E-08    |
| RP11-395N3.2 | RAD23B   | -0.515290185 | 0           |
| RP11-395N3.2 | CA12     | 0.269450551  | 1.11E-08    |
| RP11-395N3.2 | ADTRP    | -0.395472133 | 0           |
| RP11-395N3.2 | UCP2     | -0.45440149  | 0           |
| RP11-395N3.2 | IGFBP2   | -0.280776955 | 2.51E-09    |
| RP11-395N3.2 | LOXL2    | -0.303673865 | 1.01E-10    |
| RP11-395N3.2 | GPX1     | -0.414288673 | 0           |
| RP11-395N3.2 | P3H3     | -0.437172534 | 0           |
| RP11-395N3.2 | C2orf81  | -0.284584431 | 1.50E-09    |
| RP11-395N3.2 | CDT1     | -0.531162894 | 0           |
| RP11-395N3.2 | SNX25    | -0.211714329 | 8.05E-06    |
| RP11-395N3.2 | MTHFD1L  | -0.609426921 | 0           |
| RP11-395N3.2 | CDC42BPG | -0.642350179 | 1.91E-52    |
| RP11-395N3.2 | MSN      | -0.61471773  | 0           |
| RP11-395N3.2 | SIGLEC6  | -0.499659401 | 4.21E-29    |
| RP11-395N3.2 | F2R      | -0.232757144 | 8.81E-07    |
| RP11-395N3.2 | TMEM184A | -0.585248513 | 0           |
| RP11-395N3.2 | CKS2     | -0.379373903 | 7.60E-17    |
| RP11-395N3.2 | TAX1BP3  | -0.60696009  | 0           |
| RP11-395N3.2 | PMEP1    | -0.4714323   | 0           |
| RP11-395N3.2 | CXCL16   | -0.690479041 | 0           |
| RP11-395N3.2 | FAXC     | -0.625869249 | 0           |
| RP11-395N3.2 | VTCN1    | -0.669135831 | 2.59E-58    |
| RP11-395N3.2 | SH2D4A   | -0.492660354 | 0           |
| RP11-395N3.2 | RNF24    | -0.37059234  | 9.46E-16    |

|              |          |              |             |
|--------------|----------|--------------|-------------|
| RP11-395N3.2 | LY6G6C   | -0.613335603 | 1.03E-46    |
| RP11-395N3.2 | NID1     | -0.371529316 | 7.58E-16    |
| RP11-395N3.2 | STAC     | -0.685242698 | 0           |
| RP11-395N3.2 | RAB34    | -0.461903398 | 0           |
| RP11-395N3.2 | HES4     | -0.325973074 | 3.34E-12    |
| RP11-395N3.2 | EPHA10   | -0.63132856  | 0           |
| RP11-395N3.2 | ENTPD2   | -0.380329034 | 5.01E-17    |
| RP11-395N3.2 | DDB2     | -0.587900584 | 0           |
| RP11-395N3.2 | NKAIN4   | -0.264718297 | 2.03E-08    |
| RP11-395N3.2 | TRIM29   | -0.552070538 | 0           |
| RP11-395N3.2 | ADCY8    | -0.514547634 | 4.81E-31    |
| RP11-395N3.2 | SFTA2    | -0.550489622 | 0           |
| RP11-395N3.2 | NRIP1    | -0.433854112 | 0           |
| RP11-395N3.2 | VWA1     | -0.032697572 | 0.494255677 |
| RP11-395N3.2 | APLNR    | -0.18137253  | 0.000136174 |
| RP11-395N3.2 | REN      | -0.45265693  | 1.46E-23    |
| RP11-395N3.2 | EDIL3    | -0.195231719 | 3.94E-05    |
| RP11-395N3.2 | AGR      | -0.412717117 | 0           |
| RP11-395N3.2 | TREM1    | -0.439113575 | 0           |
| RP11-395N3.2 | SRL      | -0.349435346 | 6.37E-14    |
| RP11-395N3.2 | RASGRF1  | -0.491064686 | 0           |
| RP11-395N3.2 | RMI2     | -0.528573657 | 0           |
| RP11-395N3.2 | SAMD1    | -0.498395538 | 0           |
| RP11-395N3.2 | MGAT4B   | -0.642894811 | 0           |
| RP11-395N3.2 | NXN      | -0.606824777 | 0           |
| RP11-395N3.2 | SH3BGRL3 | -0.56021199  | 0           |
| RP11-395N3.2 | CA11     | -0.140538754 | 0.003192604 |
| RP11-395N3.2 | PLD3     | -0.141684656 | 0.002951109 |
| RP11-395N3.2 | LURAP1L  | -0.567507383 | 0           |
| RP11-395N3.2 | CARNS1   | -0.220338026 | 3.34E-06    |
| RP11-395N3.2 | PDLIM7   | -0.349284999 | 6.54E-14    |
| RP11-395N3.2 | BCL2L1   | -0.693510809 | 0           |
| RP11-395N3.2 | GGT6     | -0.381450824 | 2.70E-17    |
| RP11-395N3.2 | DPYSL3   | -0.299775472 | 1.78E-10    |
| RP11-395N3.2 | FYN      | -0.513448429 | 0           |
| RP11-395N3.2 | TK1      | -0.45741099  | 0           |
| RP11-395N3.2 | AK1      | -0.180797522 | 0.000143089 |
| RP11-395N3.2 | HIGD1B   | 0.018126218  | 0.704775529 |
| RP11-395N3.2 | TMEM59L  | -0.389061804 | 0           |
| RP11-395N3.2 | MEGF9    | -0.455482714 | 0           |
| RP11-395N3.2 | ZFP36L1  | -0.473153635 | 0           |
| RP11-395N3.2 | ADRA1B   | -0.284803144 | 1.46E-09    |
| RP11-395N3.2 | EPHA4    | -0.510769126 | 0           |
| RP11-395N3.2 | TCERG1L  | -0.194655151 | 4.16E-05    |
| RP11-395N3.2 | NGFR     | -0.218774414 | 3.92E-06    |
| RP11-395N3.2 | EBI3     | -0.597030072 | 0           |
| RP11-395N3.2 | S100A10  | -0.558767237 | 0           |
| RP11-395N3.2 | S100B    | -0.414994454 | 0           |
| RP11-395N3.2 | CD44     | -0.096945112 | 0.042366806 |
| RP11-395N3.2 | BHLHE41  | -0.442846444 | 0           |
| RP11-395N3.2 | FBXO2    | -0.310137525 | 3.88E-11    |

|              |          |              |             |
|--------------|----------|--------------|-------------|
| RP11-395N3.2 | SLC30A2  | -0.544790038 | 0           |
| RP11-395N3.2 | FRMD5    | -0.655256342 | 0           |
| RP11-395N3.2 | SAMD11   | -0.335366663 | 7.22E-13    |
| RP11-395N3.2 | SIPA1L2  | -0.334520888 | 8.30E-13    |
| RP11-395N3.2 | S100A16  | -0.65975726  | 0           |
| RP11-395N3.2 | PPL      | -0.680924608 | 0           |
| RP11-395N3.2 | ARHGDIB  | -0.20539052  | 1.50E-05    |
| RP11-395N3.2 | CDC42EP3 | -0.625813507 | 0           |
| RP11-395N3.2 | RUNX2    | -0.337377063 | 5.15E-13    |
| RP11-395N3.2 | LAMC2    | -0.638281274 | 0           |
| RP11-395N3.2 | BRINP1   | -0.469299069 | 0           |
| RP11-395N3.2 | GPRC5B   | -0.499591367 | 0           |
| RP11-395N3.2 | AQP5     | -0.080227904 | 0.093169075 |
| RP11-395N3.2 | PLAG1    | -0.210525166 | 9.07E-06    |
| RP11-395N3.2 | PTPRU    | -0.595729426 | 0           |
| RP11-395N3.2 | ANGPTL4  | -0.515161396 | 0           |
| RP11-395N3.2 | PALM3    | -0.411539585 | 0           |
| RP11-395N3.2 | ACP5     | -0.419447856 | 0           |
| RP11-395N3.2 | DLG4     | -0.138007671 | 0.00379086  |
| RP11-395N3.2 | ETNK2    | -0.43383851  | 0           |
| RP11-395N3.2 | CD109    | -0.53688276  | 0           |
| RP11-395N3.2 | SNX22    | -0.292939915 | 4.72E-10    |
| RP11-395N3.2 | TMEM98   | -0.54107887  | 0           |
| RP11-395N3.2 | CTHRC1   | -0.442273139 | 0           |
| RP11-395N3.2 | S100A2   | -0.562336852 | 0           |
| RP11-395N3.2 | C11orf80 | -0.647672736 | 0           |
| RP11-395N3.2 | SREBF1   | -0.470398733 | 0           |
| RP11-395N3.2 | PRSS22   | -0.596051822 | 0           |
| RP11-395N3.2 | CMTM3    | -0.488808341 | 0           |
| RP11-395N3.2 | RDH5     | -0.433561502 | 0           |
| RP11-395N3.2 | MYH10    | -0.434528264 | 0           |
| RP11-395N3.2 | EVPL     | -0.546823416 | 0           |
| RP11-395N3.2 | SCD      | -0.513556367 | 0           |
| RP11-395N3.2 | CD151    | -0.470308666 | 0           |
| RP11-395N3.2 | S100A4   | -0.537549962 | 0           |
| RP11-395N3.2 | BNIP1    | -0.320993597 | 7.34E-12    |
| RP11-395N3.2 | MAP3K6   | -0.562532729 | 0           |
| RP11-395N3.2 | MANEAL   | -0.509367633 | 0           |
| RP11-395N3.2 | CD207    | -0.403635005 | 1.24E-18    |
| RP11-395N3.2 | CD1A     | -0.43416719  | 1.32E-21    |
| RP11-395N3.2 | C3       | -0.410524031 | 0           |
| RP11-395N3.2 | NT5E     | -0.4507628   | 0           |
| RP11-395N3.2 | CACNG4   | -0.589179805 | 2.23E-42    |
| RP11-395N3.2 | FHOD1    | -0.416886561 | 0           |
| RP11-395N3.2 | LEMD1    | -0.547286088 | 0           |
| RP11-395N3.2 | ATP11A   | -0.204077959 | 1.71E-05    |
| RP11-395N3.2 | PPAP2C   | -0.306877115 | 6.31E-11    |
| RP11-395N3.2 | DRAM1    | -0.621732285 | 0           |
| RP11-395N3.2 | CDA      | -0.197042128 | 3.33E-05    |
| RP11-395N3.2 | CCND2    | -0.194323394 | 4.29E-05    |
| RP11-395N3.2 | LCN6     | -0.19275681  | 4.80E-05    |

|              |          |              |             |
|--------------|----------|--------------|-------------|
| RP11-395N3.2 | CDH4     | -0.430675258 | 0           |
| RP11-395N3.2 | MMP11    | -0.540870511 | 0           |
| RP11-395N3.2 | B3GAT1   | -0.396143023 | 0           |
| RP11-395N3.2 | SPP1     | -0.361010391 | 7.26E-15    |
| RP11-395N3.2 | HLA-DQB1 | -0.411667097 | 0           |
| RP11-395N3.2 | SDC3     | -0.476052928 | 0           |
| RP11-395N3.2 | CX3CL1   | -0.476789488 | 0           |
| RP11-395N3.2 | SDK1     | -0.354840476 | 2.37E-14    |
| RP11-395N3.2 | DOCK9    | -0.508920137 | 0           |
| RP11-395N3.2 | CSF2     | -0.575192386 | 4.98E-40    |
| RP11-395N3.2 | GRHL3    | -0.675910382 | 0           |
| RP11-395N3.2 | TMEM92   | -0.647109361 | 1.92E-53    |
| RP11-395N3.2 | BASP1    | -0.649883694 | 0           |
| RP11-395N3.2 | HRH1     | -0.650664507 | 0           |
| RP11-395N3.2 | ESM1     | -0.029357591 | 0.539408358 |
| RP11-395N3.2 | B4GALNT3 | -0.485979116 | 0           |
| RP11-395N3.2 | LMO3     | -0.230483069 | 1.13E-06    |
| RP11-395N3.2 | C9orf16  | -0.592010173 | 0           |
| RP11-395N3.2 | SEMA3F   | -0.1468037   | 0.002062566 |
| RP11-395N3.2 | PLA2G12B | -0.239142004 | 3.98E-07    |
| RP11-395N3.2 | KLK6     | -0.491600149 | 4.32E-28    |
| RP11-395N3.2 | ST3GAL5  | -0.270867079 | 9.25E-09    |
| RP11-395N3.2 | FAM132B  | -0.177098409 | 0.000196093 |
| RP11-395N3.2 | CDKN1A   | -0.407437655 | 0           |
| RP11-395N3.2 | E2F1     | -0.543071682 | 0           |
| RP11-395N3.2 | B3GNT8   | -0.358649228 | 1.15E-14    |
| RP11-395N3.2 | MTMR11   | -0.542871691 | 0           |
| RP11-395N3.2 | MYO1G    | -0.553621669 | 0           |
| RP11-395N3.2 | TMSB10   | -0.527491156 | 0           |
| RP11-395N3.2 | UNC5CL   | -0.622624015 | 0           |
| RP11-395N3.2 | ABR      | -0.513297373 | 0           |
| RP11-395N3.2 | PLP2     | -0.545510287 | 0           |
| RP11-395N3.2 | SRCIN1   | -0.418345782 | 0           |
| RP11-395N3.2 | PDE9A    | -0.692254558 | 0           |
| RP11-395N3.2 | TREM2    | -0.345726447 | 1.23E-13    |
| RP11-395N3.2 | KDEL3    | -0.474974398 | 0           |
| RP11-395N3.2 | PC       | -0.551296675 | 0           |
| RP11-395N3.2 | C2CD4A   | -0.687495071 | 0           |
| RP11-395N3.2 | PELI1    | -0.577074013 | 0           |
| RP11-395N3.2 | SSX1     | -0.397625505 | 0           |
| RP11-395N3.2 | MROH6    | -0.567572911 | 0           |
| RP11-395N3.2 | ESPN     | -0.425658053 | 0           |
| RP11-395N3.2 | BMP1     | -0.326976997 | 2.84E-12    |
| RP11-395N3.2 | TM4SF4   | -0.472176996 | 9.27E-26    |
| RP11-395N3.2 | CORO2A   | -0.532438861 | 0           |
| RP11-395N3.2 | CD164L2  | -0.490988892 | 5.14E-28    |
| RP11-395N3.2 | CTSS     | -0.517729358 | 0           |
| RP11-395N3.2 | CLU      | -0.432683956 | 0           |
| RP11-395N3.2 | TMSB4X   | -0.530670578 | 0           |
| RP11-395N3.2 | WNT10A   | -0.532298532 | 1.73E-33    |
| RP11-395N3.2 | NAPSA    | -0.437822289 | 0           |

|              |          |              |             |
|--------------|----------|--------------|-------------|
| RP11-395N3.2 | PLEKHA4  | -0.459547625 | 0           |
| RP11-395N3.2 | SFTPA1   | -0.055495225 | 0.245913137 |
| RP11-395N3.2 | C1orf116 | -0.577401232 | 0           |
| RP11-395N3.2 | TM4SF1   | -0.549590658 | 0           |
| RP11-395N3.2 | SEL1L3   | -0.582151783 | 0           |
| RP11-395N3.2 | VASN     | -0.570051657 | 0           |
| RP11-395N3.2 | NPTXR    | -0.635130788 | 0           |
| RP11-395N3.2 | PDE4C    | -0.601034276 | 0           |
| RP11-395N3.2 | CDC42EP1 | -0.603347356 | 0           |
| RP11-395N3.2 | ENDOD1   | -0.639381079 | 0           |
| RP11-395N3.2 | RYR1     | -0.475912793 | 0           |
| RP11-395N3.2 | IL1RAP   | -0.541422683 | 0           |
| RP11-395N3.2 | SLC35F2  | -0.61214128  | 1.72E-46    |
| RP11-395N3.2 | ISYNA1   | -0.312137571 | 2.87E-11    |
| RP11-395N3.2 | HLA-G    | -0.620329942 | 0           |
| RP11-395N3.2 | CDKN2B   | -0.60029261  | 0           |
| RP11-395N3.2 | ALDH1A3  | -0.596029128 | 0           |
| RP11-395N3.2 | CLIP3    | -0.360545165 | 7.96E-15    |
| RP11-395N3.2 | ULBP2    | -0.523481846 | 0           |
| RP11-395N3.2 | ETHE1    | -0.730767878 | 0           |
| RP11-395N3.2 | XPR1     | -0.495043076 | 0           |
| RP11-395N3.2 | SPTBN2   | -0.67762037  | 0           |
| RP11-395N3.2 | IVL      | -0.594354057 | 2.82E-43    |
| RP11-395N3.2 | MARCO    | -0.539512704 | 0           |
| RP11-395N3.2 | PLXND1   | -0.23887387  | 4.45E-07    |
| RP11-395N3.2 | EMILIN2  | -0.421097139 | 0           |
| RP11-395N3.2 | PLAUR    | -0.583417537 | 0           |
| RP11-395N3.2 | CDC42EP5 | -0.542244913 | 0           |
| RP11-395N3.2 | TRPC5    | -0.228466407 | 1.32E-06    |
| RP11-395N3.2 | TMEM100  | -0.284269837 | 1.57E-09    |
| RP11-395N3.2 | QSOX1    | -0.637841437 | 0           |
| RP11-395N3.2 | ARHGAP23 | -0.479930471 | 0           |
| RP11-395N3.2 | MDF1     | -0.317171654 | 1.33E-11    |
| RP11-395N3.2 | FSTL3    | -0.597665503 | 0           |
| RP11-395N3.2 | INF2     | -0.524872134 | 0           |
| RP11-395N3.2 | TGFBR1   | -0.592196547 | 0           |
| RP11-395N3.2 | TGFBI    | -0.304558078 | 8.89E-11    |
| RP11-395N3.2 | ERBB3    | -0.685294326 | 0           |
| RP11-395N3.2 | CCL18    | -0.422517354 | 0           |
| RP11-395N3.2 | CCL17    | -0.472119659 | 9.41E-26    |
| RP11-395N3.2 | C16orf45 | -0.362220829 | 5.70E-15    |
| RP11-395N3.2 | PRDM1    | -0.251043212 | 1.08E-07    |
| RP11-395N3.2 | TRIM47   | -0.675231124 | 0           |
| RP11-395N3.2 | CNFN     | -0.541320135 | 0           |
| RP11-395N3.2 | ARMCX3   | -0.384620316 | 0           |
| RP11-395N3.2 | RAMP1    | -0.35704349  | 1.57E-14    |
| RP11-395N3.2 | GABRD    | -0.047203114 | 0.323633877 |
| RP11-395N3.2 | COL13A1  | -0.179026685 | 0.000166515 |
| RP11-395N3.2 | S100A5   | -0.496417478 | 0           |
| RP11-395N3.2 | MISP     | -0.565172176 | 0           |
| RP11-395N3.2 | HES6     | -0.273435891 | 6.63E-09    |



|              |           |              |             |
|--------------|-----------|--------------|-------------|
| RP11-395N3.2 | PSD3      | -0.496531515 | 0           |
| RP11-395N3.2 | DOK7      | -0.595512557 | 0           |
| RP11-395N3.2 | ZMAT3     | -0.581533373 | 0           |
| RP11-395N3.2 | MFAP2     | -0.299169827 | 1.95E-10    |
| RP11-395N3.2 | TMEM79    | -0.560546584 | 0           |
| RP11-395N3.2 | SLC1A5    | -0.433533986 | 0           |
| RP11-395N3.2 | BBC3      | -0.576719562 | 0           |
| RP11-395N3.2 | HLA-DQB2  | -0.433503774 | 0           |
| RP11-395N3.2 | C1QL1     | -0.385347799 | 0           |
| RP11-395N3.2 | TMEM215   | -0.112974875 | 0.017888255 |
| RP11-395N3.2 | PNP       | -0.513599344 | 0           |
| RP11-395N3.2 | ARNTL     | -0.515845051 | 0           |
| RP11-395N3.2 | CLDN2     | -0.246708394 | 1.65E-07    |
| RP11-395N3.2 | MVP       | -0.614534618 | 0           |
| RP11-395N3.2 | LGALS1    | -0.457822034 | 0           |
| RP11-395N3.2 | BIRC7     | -0.461534807 | 1.52E-24    |
| RP11-395N3.2 | COL8A1    | -0.523439153 | 0           |
| RP11-395N3.2 | PERP      | -0.739649152 | 0           |
| RP11-395N3.2 | GJA4      | -0.235102562 | 6.79E-07    |
| RP11-395N3.2 | IGFL2     | -0.529697016 | 4.03E-33    |
| RP11-395N3.2 | DAPK2     | -0.532683105 | 0           |
| RP11-395N3.2 | MAMLD1    | -0.549575765 | 0           |
| RP11-395N3.2 | ETV5      | -0.181308987 | 0.000136922 |
| RP11-395N3.2 | RUNX1     | -0.7103595   | 0           |
| RP11-395N3.2 | LONRF2    | -0.304594672 | 8.84E-11    |
| RP11-395N3.2 | SPOCK1    | -0.128609542 | 0.007005008 |
| RP11-395N3.2 | XKRX      | -0.367540856 | 1.88E-15    |
| RP11-395N3.2 | TGFB1     | -0.25833747  | 4.48E-08    |
| RP11-395N3.2 | ERP27     | -0.282276883 | 2.05E-09    |
| RP11-395N3.2 | TNFRSF10C | -0.450346224 | 0           |
| RP11-395N3.2 | PALM      | -0.58514483  | 0           |
| RP11-395N3.2 | TSC22D1   | -0.224204365 | 2.22E-06    |
| RP11-395N3.2 | TGM2      | -0.62641135  | 0           |
| RP11-395N3.2 | UBE2QL1   | -0.227718805 | 1.53E-06    |
| RP11-395N3.2 | ECE1      | -0.493877033 | 0           |
| RP11-395N3.2 | COL8A2    | -0.563441054 | 0           |
| RP11-395N3.2 | HIST3H2A  | -0.55263888  | 0           |
| RP11-395N3.2 | TNFRSF21  | -0.636449873 | 0           |
| RP11-395N3.2 | SOX4      | -0.613203051 | 0           |
| RP11-395N3.2 | ELF3      | -0.738695439 | 0           |
| RP11-395N3.2 | TPD52L1   | -0.570748787 | 0           |
| RP11-395N3.2 | INHBB     | -0.347970878 | 8.27E-14    |
| RP11-395N3.2 | HPN       | -0.373562835 | 4.58E-16    |
| RP11-395N3.2 | MMP7      | -0.574467479 | 6.54E-40    |
| RP11-395N3.2 | RAB27A    | -0.506755561 | 0           |
| RP11-395N3.2 | IGF2BP2   | -0.383877231 | 0           |
| RP11-395N3.2 | ITGB4     | -0.552830927 | 0           |
| RP11-395N3.2 | PPP1R1B   | -0.461860705 | 0           |
| RP11-395N3.2 | NPDC1     | -0.28096418  | 2.45E-09    |
| RP11-395N3.2 | CCL13     | -0.566961227 | 1.06E-38    |
| RP11-395N3.2 | SPINT1    | -0.724988724 | 0           |

|              |            |              |             |
|--------------|------------|--------------|-------------|
| RP11-395N3.2 | HEY2       | -0.234741729 | 7.07E-07    |
| RP11-395N3.2 | CST2       | -0.638477542 | 1.21E-51    |
| RP11-395N3.2 | ADM        | -0.313603174 | 2.30E-11    |
| RP11-395N3.2 | VSTM2L     | -0.563318223 | 0           |
| RP11-395N3.2 | FAM84A     | -0.574093732 | 0           |
| RP11-395N3.2 | P4HA2      | -0.402215354 | 0           |
| RP11-395N3.2 | LPL        | -0.336067197 | 6.42E-13    |
| RP11-395N3.2 | TMEM173    | -0.461084004 | 0           |
| RP11-395N3.2 | DHRS3      | -0.491430342 | 0           |
| RP11-395N3.2 | SCN1B      | -0.50618807  | 0           |
| RP11-395N3.2 | GLT1D1     | -0.208112375 | 1.15E-05    |
| RP11-395N3.2 | PHYHIP     | -0.476229373 | 0           |
| RP11-395N3.2 | BHLHE40    | -0.619015111 | 0           |
| RP11-395N3.2 | BID        | -0.635194473 | 0           |
| RP11-395N3.2 | POSTN      | -0.412175299 | 0           |
| RP11-395N3.2 | ITGA3      | -0.738887203 | 0           |
| RP11-395N3.2 | RSP04      | -0.556728328 | 0           |
| RP11-395N3.2 | ADAMTS9    | -0.087022612 | 0.068530989 |
| RP11-395N3.2 | ABTB2      | -0.671142385 | 0           |
| RP11-395N3.2 | KCNQ3      | -0.731489687 | 0           |
| RP11-395N3.2 | ANXA1      | -0.486941197 | 0           |
| RP11-395N3.2 | S100A11    | -0.645092293 | 0           |
| RP11-395N3.2 | CEACAM6    | -0.653073978 | 1.01E-54    |
| RP11-395N3.2 | IER5L      | -0.505864682 | 0           |
| RP11-395N3.2 | KRT80      | -0.700911304 | 0           |
| RP11-395N3.2 | CDH6       | -0.598782612 | 0           |
| RP11-395N3.2 | UNC5B      | -0.382385814 | 1.25E-17    |
| RP11-395N3.2 | PLEKHN1    | -0.614049535 | 0           |
| RP11-395N3.2 | SYTL1      | -0.466115251 | 0           |
| RP11-395N3.2 | TMEM163    | -0.584349407 | 0           |
| RP11-395N3.2 | C4orf48    | -0.182976849 | 0.000118502 |
| RP11-395N3.2 | B3GNT7     | -0.310392548 | 3.73E-11    |
| RP11-395N3.2 | BAIAP3     | -0.41495247  | 0           |
| RP11-395N3.2 | PHLDA2     | -0.513584877 | 0           |
| RP11-395N3.2 | GAP43      | -0.483453029 | 4.28E-27    |
| RP11-395N3.2 | S100A1     | -0.56513927  | 0           |
| RP11-395N3.2 | PTPRE      | -0.699288119 | 0           |
| RP11-395N3.2 | CCND1      | -0.469396653 | 0           |
| RP11-395N3.2 | ST6GALNAC5 | -0.763093385 | 7.15E-85    |
| RP11-395N3.2 | KRT17      | -0.310645019 | 3.59E-11    |
| RP11-395N3.2 | HPCAL4     | -0.292686594 | 4.89E-10    |
| RP11-395N3.2 | GABBR2     | -0.273246538 | 6.80E-09    |
| RP11-395N3.2 | DIRAS3     | -0.249765969 | 1.26E-07    |
| RP11-395N3.2 | SERINC2    | -0.533569303 | 0           |
| RP11-395N3.2 | PTCHD4     | -0.404443048 | 0           |
| RP11-395N3.2 | EPS8       | -0.387523722 | 0           |
| RP11-395N3.2 | LY6E       | -0.551871399 | 0           |
| RP11-395N3.2 | UPP1       | -0.645285334 | 0           |
| RP11-395N3.2 | AHNAK2     | -0.671338829 | 0           |
| RP11-395N3.2 | PLXNC1     | -0.370722121 | 9.18E-16    |
| RP11-395N3.2 | TNC        | -0.533436969 | 0           |

|              |         |              |             |
|--------------|---------|--------------|-------------|
| RP11-395N3.2 | DUSP4   | -0.390843846 | 0           |
| RP11-395N3.2 | NRCAM   | -0.438189364 | 0           |
| RP11-395N3.2 | NRP2    | -0.397701529 | 0           |
| RP11-395N3.2 | CTSC    | -0.632752179 | 0           |
| RP11-395N3.2 | AMIG02  | -0.304014416 | 9.62E-11    |
| RP11-395N3.2 | NAB2    | -0.404217669 | 0           |
| RP11-395N3.2 | TBC1D2  | -0.744139715 | 0           |
| RP11-395N3.2 | PHLDA3  | -0.572025746 | 0           |
| RP11-395N3.2 | PTP4A3  | -0.471987167 | 0           |
| RP11-395N3.2 | CRABP2  | -0.314483557 | 2.01E-11    |
| RP11-395N3.2 | GOS2    | -0.318584919 | 1.07E-11    |
| RP11-395N3.2 | S100A6  | -0.713878054 | 0           |
| RP11-395N3.2 | FOXQ1   | -0.568414857 | 0           |
| RP11-395N3.2 | LRG1    | -0.57321576  | 0           |
| RP11-395N3.2 | LAMP5   | -0.402379318 | 0           |
| RP11-395N3.2 | ALDH3B1 | -0.68919428  | 0           |
| RP11-395N3.2 | CDH2    | 0.011698585  | 0.80682858  |
| RP11-395N3.2 | SCG5    | -0.139869425 | 0.00334184  |
| RP11-395N3.2 | ZCCHC16 | -0.208847163 | 1.02E-05    |
| RP11-395N3.2 | GRB7    | -0.640743992 | 0           |
| RP11-395N3.2 | TIAM1   | -0.367743683 | 1.80E-15    |
| RP11-395N3.2 | FXYD5   | -0.330854399 | 1.52E-12    |
| RP11-395N3.2 | CLDN9   | -0.461664118 | 0           |
| RP11-395N3.2 | FAM43A  | -0.564937294 | 0           |
| RP11-395N3.2 | CHST2   | -0.490070975 | 0           |
| RP11-395N3.2 | HMGA2   | -0.287639603 | 9.88E-10    |
| RP11-395N3.2 | GALNT7  | -0.430951699 | 0           |
| RP11-395N3.2 | CBLN1   | -0.523226539 | 0           |
| RP11-395N3.2 | STRA6   | -0.546624985 | 0           |
| RP11-395N3.2 | MUC21   | -0.686183797 | 2.22E-62    |
| RP11-395N3.2 | PRR36   | -0.438943512 | 0           |
| RP11-395N3.2 | NFE2L3  | -0.570613616 | 0           |
| RP11-395N3.2 | NR1D1   | -0.425715781 | 0           |
| RP11-395N3.2 | MUC1    | -0.72429897  | 0           |
| RP11-395N3.2 | NAT8L   | -0.085515734 | 0.0734749   |
| RP11-395N3.2 | APOC1   | -0.146672501 | 0.002081882 |
| RP11-395N3.2 | EVA1A   | -0.665429469 | 0           |
| RP11-395N3.2 | ENTPD1  | -0.309913423 | 4.01E-11    |
| RP11-395N3.2 | COL1A1  | -0.471397975 | 0           |
| RP11-395N3.2 | FNDC4   | -0.513571686 | 0           |
| RP11-395N3.2 | FRMD3   | -0.087650666 | 0.066552552 |
| RP11-395N3.2 | SHROOM4 | -0.452517893 | 0           |
| RP11-395N3.2 | NELL2   | -0.225345161 | 1.97E-06    |
| RP11-395N3.2 | EPHB3   | -0.663779477 | 0           |
| RP11-395N3.2 | TMC6    | -0.584045876 | 0           |
| RP11-395N3.2 | NOD1    | -0.434167147 | 0           |
| RP11-395N3.2 | GGCT    | -0.588669766 | 0           |
| RP11-395N3.2 | ICAM1   | -0.633144926 | 0           |
| RP11-395N3.2 | PRSS23  | -0.512601945 | 0           |
| RP11-395N3.2 | CFI     | -0.536679791 | 0           |
| RP11-395N3.2 | CD55    | -0.711834465 | 0           |

|              |           |              |             |
|--------------|-----------|--------------|-------------|
| RP11-395N3.2 | RASD2     | -0.499974186 | 0           |
| RP11-395N3.2 | KLK11     | -0.416867429 | 6.96E-20    |
| RP11-395N3.2 | ICAM5     | -0.46769248  | 0           |
| RP11-395N3.2 | ADORA1    | -0.497989601 | 0           |
| RP11-395N3.2 | ITGA2     | -0.627326484 | 0           |
| RP11-395N3.2 | ABCC3     | -0.365207352 | 3.09E-15    |
| RP11-395N3.2 | MFGE8     | -0.535962663 | 0           |
| RP11-395N3.2 | STK32A    | -0.260314964 | 3.51E-08    |
| RP11-395N3.2 | CYSLTR2   | -0.373020166 | 5.26E-16    |
| RP11-395N3.2 | LAD1      | -0.689587736 | 0           |
| RP11-395N3.2 | MGAT3     | -0.643285714 | 0           |
| RP11-395N3.2 | IGFBP6    | -0.403352888 | 0           |
| RP11-395N3.2 | CYP2S1    | -0.675732802 | 0           |
| RP11-395N3.2 | KCNJ2     | -0.392760633 | 0           |
| RP11-395N3.2 | FAM20A    | -0.486465334 | 0           |
| RP11-395N3.2 | TGFA      | -0.425879319 | 0           |
| RP11-395N3.2 | MXRA8     | -0.547111061 | 0           |
| RP11-395N3.2 | C8orf4    | -0.424804761 | 0           |
| RP11-395N3.2 | CLDN10    | -0.514627954 | 4.69E-31    |
| RP11-395N3.2 | PDE5A     | -0.546052673 | 0           |
| RP11-395N3.2 | APOE      | -0.119179217 | 0.012498333 |
| RP11-395N3.2 | SPOCK2    | -0.62775086  | 0           |
| RP11-395N3.2 | TENM1     | -0.099727531 | 0.036763761 |
| RP11-395N3.2 | SLIT1     | -0.090921431 | 0.056993691 |
| RP11-395N3.2 | CXCL14    | -0.257566585 | 4.93E-08    |
| RP11-395N3.2 | ECM1      | -0.143248127 | 0.002648408 |
| RP11-395N3.2 | DUSP5     | -0.701895511 | 0           |
| RP11-395N3.2 | SEZ6L2    | -0.522726564 | 0           |
| RP11-395N3.2 | THRSP     | -0.237114097 | 5.43E-07    |
| RP11-395N3.2 | C19orf33  | -0.647499979 | 0           |
| RP11-395N3.2 | MPZL2     | -0.621391025 | 0           |
| RP11-395N3.2 | CTSH      | -0.550026524 | 0           |
| RP11-395N3.2 | CYP1B1    | -0.529510208 | 0           |
| RP11-395N3.2 | ALOX5     | -0.652209823 | 0           |
| RP11-395N3.2 | SYTL5     | -0.551308467 | 2.86E-36    |
| RP11-395N3.2 | TNFRSF12A | -0.51407464  | 0           |
| RP11-395N3.2 | DUSP6     | -0.508784541 | 0           |
| RP11-395N3.2 | ALOX15B   | -0.678525291 | 0           |
| RP11-395N3.2 | SDC4      | -0.548832539 | 0           |
| RP11-395N3.2 | MDK       | -0.482177739 | 0           |
| RP11-395N3.2 | KRT19     | -0.722234956 | 0           |
| RP11-395N3.2 | MET       | -0.692605037 | 0           |
| RP11-395N3.2 | TESC      | -0.180857093 | 0.000142357 |
| RP11-395N3.2 | CXCL17    | -0.709368722 | 2.21E-68    |
| RP11-395N3.2 | NPC2      | -0.438849899 | 0           |
| RP11-395N3.2 | COMP      | -0.465079415 | 0           |
| RP11-395N3.2 | TUSC3     | -0.391798268 | 0           |
| RP11-395N3.2 | TMPRSS4   | -0.753128643 | 0           |
| RP11-395N3.2 | LGALS3    | -0.693558609 | 0           |
| RP11-395N3.2 | CRLF1     | -0.466500055 | 0           |
| RP11-395N3.2 | CTXN1     | -0.576240437 | 0           |

|              |          |              |             |
|--------------|----------|--------------|-------------|
| RP11-395N3.2 | PCSK1N   | -0.206297285 | 1.38E-05    |
| RP11-395N3.2 | NMU      | -0.572173764 | 1.55E-39    |
| RP11-395N3.2 | GALE     | -0.534747119 | 0           |
| RP11-395N3.2 | PCSK2    | -0.163766428 | 0.000580425 |
| RP11-395N3.2 | GJB3     | -0.53767875  | 0           |
| RP11-395N3.2 | SLPI     | -0.621599242 | 0           |
| RP11-395N3.2 | AGR2     | -0.334878034 | 7.83E-13    |
| RP11-395N3.2 | MRC2     | -0.426864946 | 0           |
| RP11-395N3.2 | GOLT1A   | -0.382053773 | 1.72E-17    |
| RP11-395N3.2 | SLC27A6  | -0.569619145 | 4.00E-39    |
| RP11-395N3.2 | KCNN4    | -0.613872097 | 0           |
| RP11-395N3.2 | ETV4     | -0.37621031  | 3.30E-16    |
| RP11-395N3.2 | SYT12    | -0.597869748 | 0           |
| RP11-395N3.2 | PVRL4    | -0.712843778 | 0           |
| RP11-395N3.2 | PLCD3    | -0.609878389 | 0           |
| RP11-395N3.2 | PLAU     | -0.537321037 | 0           |
| RP11-395N3.2 | LRRK2    | -0.11851159  | 0.013003082 |
| RP11-395N3.2 | SFN      | -0.661522139 | 0           |
| RP11-395N3.2 | LPAR5    | -0.526953168 | 0           |
| RP11-395N3.2 | NGEF     | -0.663157096 | 0           |
| RP11-395N3.2 | DTX4     | -0.597232474 | 0           |
| RP11-395N3.2 | CST6     | -0.600155312 | 0           |
| RP11-395N3.2 | QPCT     | -0.427634979 | 0           |
| RP11-395N3.2 | TIMP1    | -0.489843185 | 0           |
| RP11-395N3.2 | CAMK2N1  | -0.45097896  | 0           |
| RP11-395N3.2 | KLHDC8A  | -0.130663911 | 0.006144624 |
| RP11-395N3.2 | PDLIM4   | -0.663155819 | 0           |
| RP11-395N3.2 | SCEL     | -0.565611729 | 0           |
| RP11-395N3.2 | LCN2     | -0.745275121 | 0           |
| RP11-395N3.2 | PROS1    | -0.71593994  | 0           |
| RP11-395N3.2 | GABRB2   | -0.643600592 | 0           |
| RP11-395N3.2 | TMPRSS6  | -0.721658104 | 0           |
| RP11-395N3.2 | KLK7     | -0.551690518 | 2.50E-36    |
| RP11-395N3.2 | PDZK1IP1 | -0.555094364 | 0           |
| RP11-395N3.2 | CDH3     | -0.427974537 | 0           |
| RP11-395N3.2 | LRP4     | -0.181923141 | 0.000129847 |
| RP11-395N3.2 | IGSF1    | -0.363861175 | 4.09E-15    |
| RP11-395N3.2 | B3GNT3   | -0.758125849 | 0           |
| RP11-395N3.2 | CLDN1    | -0.581254096 | 0           |
| RP11-395N3.2 | GDF15    | -0.717762264 | 0           |
| RP11-395N3.2 | ARHGAP36 | -0.31038933  | 2.94E-11    |
| RP11-395N3.2 | LAMB3    | -0.597942369 | 0           |
| RP11-395N3.2 | KLK10    | -0.591327652 | 0           |
| RP11-395N3.2 | DPP4     | -0.623816724 | 0           |
| RP11-395N3.2 | METTL7B  | -0.403460968 | 0           |
| RP11-395N3.2 | LIPH     | -0.672055107 | 0           |
| RP11-395N3.2 | CLDN16   | -0.528980021 | 0           |
| RP11-395N3.2 | CHI3L1   | -0.549657321 | 0           |
| RP11-395N3.2 | SLC22A31 | -0.516805259 | 2.40E-31    |
| RP11-395N3.2 | TACSTD2  | -0.700897687 | 0           |
| RP11-395N3.2 | SFTPB    | -0.636312859 | 0           |

|              |           |              |          |
|--------------|-----------|--------------|----------|
| RP11-395N3.2 | RXRG      | -0.266172553 | 1.69E-08 |
| RP11-395N3.2 | DCSTAMP   | -0.689964319 | 2.55E-63 |
| RP11-395N3.2 | CITED1    | -0.411656034 | 0        |
| RP11-395N3.2 | SERPINA1  | -0.668597259 | 0        |
| RP11-395N3.2 | PRR15     | -0.288267516 | 9.06E-10 |
| RP11-395N3.2 | SLC34A2   | -0.750056877 | 0        |
| RP11-395N3.2 | FN1       | -0.783123651 | 0        |
| RP11-395N3.2 | ZCCHC12   | -0.203696985 | 1.77E-05 |
| AC006227.1   | TFF3      | 0.642852006  | 1.51E-52 |
| AC006227.1   | CCL21     | 0.381617675  | 1.14E-16 |
| AC006227.1   | TPO       | 0.739829668  | 3.13E-77 |
| AC006227.1   | MT1G      | 0.593870646  | 3.43E-43 |
| AC006227.1   | DI01      | 0.552302408  | 2.02E-36 |
| AC006227.1   | DPT       | 0.300429732  | 1.31E-10 |
| AC006227.1   | CDH16     | 0.553924743  | 1.15E-36 |
| AC006227.1   | CRABP1    | 0.590862697  | 1.14E-42 |
| AC006227.1   | SLC26A7   | 0.721398912  | 9.80E-72 |
| AC006227.1   | MT1H      | 0.53105711   | 2.60E-33 |
| AC006227.1   | SLC26A4   | 0.762352569  | 1.29E-84 |
| AC006227.1   | SLC5A8    | 0.566245915  | 1.38E-38 |
| AC006227.1   | PKHD1L1   | 0.568521414  | 6.00E-39 |
| AC006227.1   | TFCP2L1   | 0.595520497  | 1.76E-43 |
| AC006227.1   | WSCD2     | 0.647438549  | 1.63E-53 |
| AC006227.1   | IPCEF1    | 0.573631608  | 8.96E-40 |
| AC006227.1   | SLC5A5    | 0.495385235  | 1.46E-28 |
| AC006227.1   | MT1F      | 0.609512598  | 5.29E-46 |
| AC006227.1   | FOSB      | 0.40379599   | 1.20E-18 |
| AC006227.1   | SEMA3D    | 0.600223415  | 2.58E-44 |
| AC006227.1   | BMP8A     | 0.595886862  | 1.52E-43 |
| AC006227.1   | MATN2     | 0.654287917  | 5.50E-55 |
| AC006227.1   | PLA2R1    | 0.521305158  | 5.87E-32 |
| AC006227.1   | COL23A1   | 0.716609636  | 2.22E-70 |
| AC006227.1   | HGD       | 0.740163127  | 2.47E-77 |
| AC006227.1   | TCEAL2    | 0.512860595  | 8.07E-31 |
| AC006227.1   | CHRD1     | 0.29800897   | 1.87E-10 |
| AC006227.1   | TNFRSF11B | 0.544751703  | 2.73E-35 |
| AC006227.1   | FAM167A   | 0.74578825   | 4.15E-79 |
| AC006227.1   | KIT       | 0.595910974  | 1.50E-43 |
| AC006227.1   | SLC4A4    | 0.703381896  | 8.91E-67 |
| AC006227.1   | SMOC2     | 0.467107166  | 3.56E-25 |
| AC006227.1   | FHL1      | 0.73260916   | 5.05E-75 |
| AC006227.1   | OTOS      | 0.598335115  | 5.60E-44 |
| AC006227.1   | IGFBPL1   | 0.626210616  | 3.50E-49 |
| AC006227.1   | HBB       | 0.409709893  | 3.36E-19 |
| AC006227.1   | BEX1      | 0.598291429  | 5.70E-44 |
| AC006227.1   | FABP4     | 0.579137953  | 1.11E-40 |
| AC006227.1   | LMOD1     | 0.654948736  | 3.94E-55 |
| AC006227.1   | SOD3      | 0.523231307  | 3.20E-32 |
| AC006227.1   | TMEM171   | 0.477042864  | 2.49E-26 |
| AC006227.1   | PI16      | 0.375125721  | 4.07E-16 |
| AC006227.1   | ZMAT4     | 0.642524476  | 1.76E-52 |

|            |            |             |             |
|------------|------------|-------------|-------------|
| AC006227.1 | MFAP4      | 0.284206921 | 1.33E-09    |
| AC006227.1 | CWH43      | 0.533499916 | 1.17E-33    |
| AC006227.1 | SPX        | 0.751861578 | 4.47E-81    |
| AC006227.1 | APOD       | 0.145302741 | 0.002273502 |
| AC006227.1 | DPP6       | 0.57191949  | 1.70E-39    |
| AC006227.1 | MMRN1      | 0.434451696 | 1.23E-21    |
| AC006227.1 | WDR72      | 0.644242579 | 7.70E-53    |
| AC006227.1 | MPPED2     | 0.744182794 | 1.35E-78    |
| AC006227.1 | PAPSS2     | 0.426463423 | 7.92E-21    |
| AC006227.1 | DCN        | 0.128203979 | 0.007153332 |
| AC006227.1 | SORBS2     | 0.69251376  | 5.81E-64    |
| AC006227.1 | EGR2       | 0.45351689  | 1.18E-23    |
| AC006227.1 | EDN3       | 0.68545012  | 3.36E-62    |
| AC006227.1 | DIO2       | 0.7373895   | 1.78E-76    |
| AC006227.1 | ITPR1      | 0.686275759 | 2.11E-62    |
| AC006227.1 | CFD        | 0.255746429 | 5.52E-08    |
| AC006227.1 | CPXM1      | 0.4297705   | 3.69E-21    |
| AC006227.1 | ELMO1      | 0.713337877 | 1.81E-69    |
| AC006227.1 | GPC3       | 0.494836433 | 1.71E-28    |
| AC006227.1 | MYOC       | 0.34305998  | 1.44E-13    |
| AC006227.1 | DEPTOR     | 0.628965432 | 1.00E-49    |
| AC006227.1 | DGKI       | 0.583262497 | 2.27E-41    |
| AC006227.1 | CARTPT     | 0.675714988 | 7.51E-60    |
| AC006227.1 | IYD        | 0.58304109  | 2.47E-41    |
| AC006227.1 | LYVE1      | 0.424926617 | 1.13E-20    |
| AC006227.1 | CLCNKB     | 0.69793875  | 2.37E-65    |
| AC006227.1 | NCAM1      | 0.341961198 | 1.74E-13    |
| AC006227.1 | HBA2       | 0.360301745 | 6.66E-15    |
| AC006227.1 | GLT8D2     | 0.539257496 | 1.74E-34    |
| AC006227.1 | OGDHL      | 0.528163981 | 6.62E-33    |
| AC006227.1 | LIFR       | 0.546983512 | 1.27E-35    |
| AC006227.1 | CSGALNACT1 | 0.417845961 | 5.59E-20    |
| AC006227.1 | RAP1GAP    | 0.526616253 | 1.09E-32    |
| AC006227.1 | COL9A3     | 0.616093987 | 3.11E-47    |
| AC006227.1 | FBLN1      | 0.132019968 | 0.005599185 |
| AC006227.1 | EFEMP1     | 0.38441223  | 6.57E-17    |
| AC006227.1 | AOX1       | 0.432449963 | 1.97E-21    |
| AC006227.1 | GRIN2C     | 0.587248549 | 4.78E-42    |
| AC006227.1 | C11orf74   | 0.618205092 | 1.24E-47    |
| AC006227.1 | PPARGC1A   | 0.600519124 | 2.29E-44    |
| AC006227.1 | ANGPTL1    | 0.598771122 | 4.69E-44    |
| AC006227.1 | SCARA5     | 0.25387177  | 6.94E-08    |
| AC006227.1 | LTF        | 0.537304539 | 3.33E-34    |
| AC006227.1 | CA4        | 0.669387437 | 2.26E-58    |
| AC006227.1 | TG         | 0.752774301 | 2.23E-81    |
| AC006227.1 | FCGBP      | 0.629097199 | 9.44E-50    |
| AC006227.1 | PBX4       | 0.665225553 | 2.03E-57    |
| AC006227.1 | CYR61      | 0.458328718 | 3.47E-24    |
| AC006227.1 | FOS        | 0.425738919 | 9.36E-21    |
| AC006227.1 | KHDRBS2    | 0.769167423 | 5.16E-87    |
| AC006227.1 | MUM1L1     | 0.453052798 | 1.32E-23    |

|            |          |             |             |
|------------|----------|-------------|-------------|
| AC006227.1 | RGS16    | 0.670013978 | 1.62E-58    |
| AC006227.1 | MT1M     | 0.496146921 | 1.17E-28    |
| AC006227.1 | LRP2     | 0.639823356 | 6.39E-52    |
| AC006227.1 | MAFB     | 0.547162653 | 1.20E-35    |
| AC006227.1 | KCNK2    | 0.55111211  | 3.06E-36    |
| AC006227.1 | TBC1D4   | 0.629693341 | 7.19E-50    |
| AC006227.1 | MIOX     | 0.677304932 | 3.15E-60    |
| AC006227.1 | TPPP     | 0.555679695 | 6.17E-37    |
| AC006227.1 | FMOD     | 0.487500807 | 1.38E-27    |
| AC006227.1 | CITED2   | 0.43413086  | 1.33E-21    |
| AC006227.1 | RGS8     | 0.641198676 | 3.32E-52    |
| AC006227.1 | ABI3BP   | 0.365914811 | 2.35E-15    |
| AC006227.1 | ADH1B    | 0.330532184 | 1.19E-12    |
| AC006227.1 | OGN      | 0.194570287 | 4.05E-05    |
| AC006227.1 | NR4A1    | 0.366397483 | 2.15E-15    |
| AC006227.1 | FOXJ1    | 0.697660268 | 2.80E-65    |
| AC006227.1 | ALDH1A1  | 0.60717512  | 1.42E-45    |
| AC006227.1 | OCA2     | 0.405929225 | 7.62E-19    |
| AC006227.1 | TMEM139  | 0.305017563 | 6.63E-11    |
| AC006227.1 | ARHGAP24 | 0.629894608 | 6.56E-50    |
| AC006227.1 | SLC25A15 | 0.601177533 | 1.74E-44    |
| AC006227.1 | DES      | 0.248055598 | 1.40E-07    |
| AC006227.1 | GDF10    | 0.451147251 | 2.13E-23    |
| AC006227.1 | KIAA1324 | 0.587926673 | 3.66E-42    |
| AC006227.1 | JUN      | 0.456758012 | 5.18E-24    |
| AC006227.1 | C7       | 0.061580904 | 0.197813148 |
| AC006227.1 | LGI3     | 0.702759798 | 1.30E-66    |
| AC006227.1 | CDON     | 0.717079118 | 1.64E-70    |
| AC006227.1 | BCL2     | 0.594830175 | 2.33E-43    |
| AC006227.1 | HLF      | 0.749647215 | 2.37E-80    |
| AC006227.1 | EGR1     | 0.490740227 | 5.52E-28    |
| AC006227.1 | IP6K3    | 0.559021522 | 1.88E-37    |
| AC006227.1 | SCUBE3   | 0.559395405 | 1.65E-37    |
| AC006227.1 | PKNOX2   | 0.609573729 | 5.16E-46    |
| AC006227.1 | SMAD9    | 0.421635993 | 2.38E-20    |
| AC006227.1 | IQGAP2   | 0.609880665 | 4.53E-46    |
| AC006227.1 | GNA14    | 0.730897326 | 1.64E-74    |
| AC006227.1 | LAYN     | 0.532983326 | 1.38E-33    |
| AC006227.1 | AVPR1A   | 0.62671249  | 2.79E-49    |
| AC006227.1 | PDLIM3   | 0.437369288 | 6.15E-22    |
| AC006227.1 | GPM6A    | 0.599584559 | 3.36E-44    |
| AC006227.1 | SDPR     | 0.612313457 | 1.60E-46    |
| AC006227.1 | CRYAB    | 0.175437054 | 0.000220734 |
| AC006227.1 | FOXA2    | 0.536051054 | 5.05E-34    |
| AC006227.1 | C8orf88  | 0.575180612 | 5.00E-40    |
| AC006227.1 | ISM1     | 0.498657298 | 5.64E-29    |
| AC006227.1 | BMP2     | 0.286925799 | 9.13E-10    |
| AC006227.1 | ID4      | 0.519780124 | 9.48E-32    |
| AC006227.1 | NUPR1    | 0.323825747 | 3.56E-12    |
| AC006227.1 | SERTM1   | 0.496524315 | 1.05E-28    |
| AC006227.1 | IRS1     | 0.692551489 | 5.68E-64    |



|            |          |             |             |
|------------|----------|-------------|-------------|
| AC006227.1 | FIBIN    | 0.207266463 | 1.20E-05    |
| AC006227.1 | PODN     | 0.186386037 | 8.55E-05    |
| AC006227.1 | TDRD9    | 0.407601199 | 5.31E-19    |
| AC006227.1 | EPHA3    | 0.349514172 | 4.65E-14    |
| AC006227.1 | AIF1L    | 0.466830725 | 3.83E-25    |
| AC006227.1 | EBF4     | 0.672656264 | 3.94E-59    |
| AC006227.1 | ADM2     | 0.535083227 | 6.95E-34    |
| AC006227.1 | GSTM3    | 0.62103588  | 3.55E-48    |
| AC006227.1 | HSD17B6  | 0.562509725 | 5.38E-38    |
| AC006227.1 | AGR3     | 0.360982089 | 5.87E-15    |
| AC006227.1 | EPHB1    | 0.468528233 | 2.45E-25    |
| AC006227.1 | TMOD1    | 0.340630481 | 2.18E-13    |
| AC006227.1 | WASF3    | 0.656844391 | 1.52E-55    |
| AC006227.1 | SELV     | 0.704568546 | 4.32E-67    |
| AC006227.1 | ENPP1    | 0.36995391  | 1.10E-15    |
| AC006227.1 | SYNE1    | 0.669545655 | 2.08E-58    |
| AC006227.1 | PLCH1    | 0.545632512 | 2.02E-35    |
| AC006227.1 | CCDC146  | 0.64001512  | 5.84E-52    |
| AC006227.1 | SLC16A2  | 0.62702751  | 2.42E-49    |
| AC006227.1 | IER2     | 0.539274659 | 1.73E-34    |
| AC006227.1 | KCNAB1   | 0.72340137  | 2.61E-72    |
| AC006227.1 | SYNDIG1  | 0.488659901 | 9.96E-28    |
| AC006227.1 | C16orf89 | 0.785387928 | 4.53E-93    |
| AC006227.1 | CTGF     | 0.352718842 | 2.63E-14    |
| AC006227.1 | NR4A3    | 0.189082079 | 6.71E-05    |
| AC006227.1 | KIAA1456 | 0.689559858 | 3.22E-63    |
| AC006227.1 | AQP4     | 0.593578887 | 3.86E-43    |
| AC006227.1 | RNF150   | 0.597477283 | 7.95E-44    |
| AC006227.1 | C1S      | 0.03232896  | 0.499286826 |
| AC006227.1 | PFKFB2   | 0.5187623   | 1.30E-31    |
| AC006227.1 | PROX1    | 0.580520358 | 6.54E-41    |
| AC006227.1 | TCF7L1   | 0.677881973 | 2.30E-60    |
| AC006227.1 | HSPB6    | 0.36651535  | 2.10E-15    |
| AC006227.1 | FHDC1    | 0.574586172 | 6.26E-40    |
| AC006227.1 | PRR15L   | 0.454306214 | 9.64E-24    |
| AC006227.1 | SLC1A1   | 0.443052139 | 1.57E-22    |
| AC006227.1 | BTBD11   | 0.747028049 | 1.66E-79    |
| AC006227.1 | TRIM58   | 0.547729576 | 9.85E-36    |
| AC006227.1 | LRIG1    | 0.521357638 | 5.78E-32    |
| AC006227.1 | ROR2     | 0.329133013 | 1.50E-12    |
| AC006227.1 | GPR125   | 0.560200615 | 1.24E-37    |
| AC006227.1 | FLRT1    | 0.695951611 | 7.72E-65    |
| AC006227.1 | PGF      | 0.626379314 | 3.25E-49    |
| AC006227.1 | DUSP1    | 0.373159148 | 5.95E-16    |
| AC006227.1 | PLA2G7   | 0.390289823 | 2.01E-17    |
| AC006227.1 | PLSCR4   | 0.456333635 | 5.77E-24    |
| AC006227.1 | FAM46B   | 0.377500644 | 2.57E-16    |
| AC006227.1 | GLDC     | 0.500749397 | 3.05E-29    |
| AC006227.1 | ZBTB16   | 0.479321195 | 1.34E-26    |
| AC006227.1 | OMD      | 0.114121699 | 0.016751471 |
| AC006227.1 | HSD11B2  | 0.623650507 | 1.11E-48    |

|            |          |              |             |
|------------|----------|--------------|-------------|
| AC006227.1 | FGL2     | 0.153390016  | 0.00126496  |
| AC006227.1 | CLCNKA   | 0.682400364  | 1.87E-61    |
| AC006227.1 | GATM     | 0.612830738  | 1.28E-46    |
| AC006227.1 | TNS3     | 0.390450099  | 1.94E-17    |
| AC006227.1 | TOB1     | 0.312855063  | 2.01E-11    |
| AC006227.1 | MARC2    | 0.690583497  | 1.78E-63    |
| AC006227.1 | LRRC2    | 0.606698547  | 1.74E-45    |
| AC006227.1 | SORD     | 0.376676002  | 3.02E-16    |
| AC006227.1 | RIMS4    | 0.520128476  | 8.50E-32    |
| AC006227.1 | SLC29A4  | 0.591156874  | 1.02E-42    |
| AC006227.1 | SLC39A14 | 0.64309469   | 1.34E-52    |
| AC006227.1 | FAXDC2   | 0.732174145  | 6.82E-75    |
| AC006227.1 | HSPB8    | 0.216165615  | 4.87E-06    |
| AC006227.1 | CCL19    | -0.019620486 | 0.681833653 |
| AC006227.1 | KCNIP3   | 0.732484768  | 5.50E-75    |
| AC006227.1 | CGNL1    | 0.625765159  | 4.28E-49    |
| AC006227.1 | ATF3     | 0.12183336   | 0.010620656 |
| AC006227.1 | SGCD     | 0.28909293   | 6.74E-10    |
| AC006227.1 | STARD13  | 0.60813933   | 9.48E-46    |
| AC006227.1 | LDHD     | 0.707940828  | 5.38E-68    |
| AC006227.1 | RCAN1    | 0.387475347  | 3.55E-17    |
| AC006227.1 | ID3      | 0.367355877  | 1.79E-15    |
| AC006227.1 | SYTL3    | 0.652738487  | 1.19E-54    |
| AC006227.1 | MT1E     | 0.442529043  | 1.78E-22    |
| AC006227.1 | CAMK1D   | 0.672848879  | 3.55E-59    |
| AC006227.1 | PRKCQ    | 0.665643547  | 1.63E-57    |
| AC006227.1 | NUAK2    | 0.373127944  | 5.99E-16    |
| AC006227.1 | LIPG     | 0.732237688  | 6.53E-75    |
| AC006227.1 | SLC25A25 | 0.320044367  | 6.51E-12    |
| AC006227.1 | PRKX     | 0.241562564  | 3.01E-07    |
| AC006227.1 | SRPX     | 0.193617183  | 4.43E-05    |
| AC006227.1 | FAM189A1 | 0.600776275  | 2.06E-44    |
| AC006227.1 | PLEKHH1  | 0.643290993  | 1.22E-52    |
| AC006227.1 | WNT11    | 0.46893871   | 2.19E-25    |
| AC006227.1 | SNAI1    | 0.310460425  | 2.90E-11    |
| AC006227.1 | FDCSP    | 0.065076811  | 0.173492782 |
| AC006227.1 | MT1X     | 0.402337336  | 1.64E-18    |
| AC006227.1 | ACACB    | 0.689003147  | 4.43E-63    |
| AC006227.1 | ARC      | 0.240956635  | 3.23E-07    |
| AC006227.1 | KLK4     | 0.133292011  | 0.005153048 |
| AC006227.1 | ZFPM2    | 0.325813312  | 2.58E-12    |
| AC006227.1 | AKAP12   | 0.409488627  | 3.53E-19    |
| AC006227.1 | GJB6     | 0.469080897  | 2.11E-25    |
| AC006227.1 | ERO1LB   | 0.697870243  | 2.47E-65    |
| AC006227.1 | DNALI1   | 0.592729849  | 5.42E-43    |
| AC006227.1 | HKDC1    | 0.306659329  | 5.18E-11    |
| AC006227.1 | ZFP36L2  | 0.514727598  | 4.55E-31    |
| AC006227.1 | CAPSL    | 0.641926535  | 2.35E-52    |
| AC006227.1 | CYP7B1   | 0.489560425  | 7.72E-28    |
| AC006227.1 | CPQ      | 0.60961004   | 5.08E-46    |
| AC006227.1 | RPS6KA6  | 0.659216217  | 4.54E-56    |

|            |          |             |             |
|------------|----------|-------------|-------------|
| AC006227.1 | TLE1     | 0.422665306 | 1.89E-20    |
| AC006227.1 | TP53INP2 | 0.654869024 | 4.11E-55    |
| AC006227.1 | KATNAL2  | 0.710556307 | 1.05E-68    |
| AC006227.1 | SGPP2    | 0.11421358  | 0.016663191 |
| AC006227.1 | CTH      | 0.510160014 | 1.84E-30    |
| AC006227.1 | KIF12    | 0.432695751 | 1.86E-21    |
| AC006227.1 | TMEM220  | 0.625350285 | 5.16E-49    |
| AC006227.1 | CENPJ    | 0.560135653 | 1.27E-37    |
| AC006227.1 | FAM155B  | 0.574206048 | 7.22E-40    |
| AC006227.1 | WFS1     | 0.522047534 | 4.65E-32    |
| AC006227.1 | SELENBP1 | 0.641133223 | 3.43E-52    |
| AC006227.1 | SNTA1    | 0.504395181 | 1.04E-29    |
| AC006227.1 | FRAS1    | 0.163147141 | 0.000600065 |
| AC006227.1 | FBLN7    | 0.597557137 | 7.70E-44    |
| AC006227.1 | AGPAT9   | 0.62337974  | 1.25E-48    |
| AC006227.1 | GPR83    | 0.600671741 | 2.15E-44    |
| AC006227.1 | PRTG     | 0.579143119 | 1.11E-40    |
| AC006227.1 | EGR3     | 0.257872286 | 4.24E-08    |
| AC006227.1 | GRAMD2   | 0.331096749 | 1.09E-12    |
| AC006227.1 | HYOU1    | 0.59916543  | 3.99E-44    |
| AC006227.1 | FBLN5    | 0.336986966 | 4.05E-13    |
| AC006227.1 | ITM2A    | 0.610157248 | 4.02E-46    |
| AC006227.1 | SRF      | 0.492822256 | 3.05E-28    |
| AC006227.1 | FGFR2    | 0.477808359 | 2.02E-26    |
| AC006227.1 | MT1A     | 0.221167229 | 2.89E-06    |
| AC006227.1 | MAMDC2   | 0.274858854 | 4.75E-09    |
| AC006227.1 | FHL2     | 0.236795273 | 5.20E-07    |
| AC006227.1 | FTCDNL1  | 0.506879886 | 4.94E-30    |
| AC006227.1 | PKIA     | 0.449451409 | 3.25E-23    |
| AC006227.1 | DNAJB4   | 0.528262983 | 6.41E-33    |
| AC006227.1 | SLC25A33 | 0.517547322 | 1.90E-31    |
| AC006227.1 | EYA2     | 0.302431303 | 9.75E-11    |
| AC006227.1 | LPAR1    | 0.162175556 | 0.000647552 |
| AC006227.1 | STX11    | 0.28992906  | 5.98E-10    |
| AC006227.1 | ARHGEF28 | 0.507897568 | 3.64E-30    |
| AC006227.1 | OR2W3    | 0.610047182 | 4.22E-46    |
| AC006227.1 | ALDH1B1  | 0.459131745 | 2.83E-24    |
| AC006227.1 | CXCL12   | 0.215604081 | 5.16E-06    |
| AC006227.1 | OLFM2    | 0.496764054 | 9.78E-29    |
| AC006227.1 | TUB      | 0.486362137 | 1.90E-27    |
| AC006227.1 | HTRA3    | 0.277882824 | 3.17E-09    |
| AC006227.1 | CKB      | 0.487085791 | 1.55E-27    |
| AC006227.1 | RGS2     | 0.041881698 | 0.381355614 |
| AC006227.1 | SHANK2   | 0.677638013 | 2.62E-60    |
| AC006227.1 | CNTFR    | 0.630873331 | 4.18E-50    |
| AC006227.1 | CYTH3    | 0.575195221 | 4.97E-40    |
| AC006227.1 | PLAC9    | 0.391855422 | 1.46E-17    |
| AC006227.1 | WVOX     | 0.672377979 | 4.57E-59    |
| AC006227.1 | NPR3     | 0.44238139  | 1.84E-22    |
| AC006227.1 | SDC2     | 0.48566756  | 2.31E-27    |
| AC006227.1 | KLF15    | 0.634759483 | 6.93E-51    |

|            |          |             |             |
|------------|----------|-------------|-------------|
| AC006227.1 | TMEM164  | 0.530590674 | 3.02E-33    |
| AC006227.1 | LONRF3   | 0.316255327 | 1.18E-11    |
| AC006227.1 | GBP1     | 0.212106375 | 7.38E-06    |
| AC006227.1 | ARHGAP6  | 0.462133218 | 1.30E-24    |
| AC006227.1 | TMEM119  | 0.108041958 | 0.023579845 |
| AC006227.1 | SH3RF1   | 0.457142107 | 4.70E-24    |
| AC006227.1 | CRELD2   | 0.540111073 | 1.31E-34    |
| AC006227.1 | PCP4     | 0.052984858 | 0.267961526 |
| AC006227.1 | GCSH     | 0.674513481 | 1.44E-59    |
| AC006227.1 | IMPA2    | 0.598479221 | 5.28E-44    |
| AC006227.1 | C1R      | 0.01185504  | 0.80437336  |
| AC006227.1 | SUCNR1   | 0.37933006  | 1.80E-16    |
| AC006227.1 | SFRP1    | 0.409190911 | 3.77E-19    |
| AC006227.1 | UGT8     | 0.486346535 | 1.91E-27    |
| AC006227.1 | TLE4     | 0.222911535 | 2.40E-06    |
| AC006227.1 | ANTXR1   | 0.372518753 | 6.73E-16    |
| AC006227.1 | GPX3     | 0.413087463 | 1.61E-19    |
| AC006227.1 | DPY19L2  | 0.585782945 | 8.50E-42    |
| AC006227.1 | FAM46C   | 0.431689133 | 2.36E-21    |
| AC006227.1 | IL33     | 0.262991484 | 2.23E-08    |
| AC006227.1 | PEG3     | 0.594696139 | 2.46E-43    |
| AC006227.1 | FAHD2A   | 0.63821634  | 1.37E-51    |
| AC006227.1 | PTGDS    | 0.102631152 | 0.031562302 |
| AC006227.1 | CHCHD10  | 0.357328269 | 1.15E-14    |
| AC006227.1 | CD36     | 0.619216817 | 7.93E-48    |
| AC006227.1 | ANKRD37  | 0.535334137 | 6.40E-34    |
| AC006227.1 | TSPAN33  | 0.46950152  | 1.89E-25    |
| AC006227.1 | PRDM16   | 0.60102449  | 1.86E-44    |
| AC006227.1 | UST      | 0.720514132 | 1.75E-71    |
| AC006227.1 | NEXN     | 0.59336372  | 4.20E-43    |
| AC006227.1 | NUPR1L   | 0.256706971 | 4.90E-08    |
| AC006227.1 | SLC24A3  | 0.529764047 | 3.95E-33    |
| AC006227.1 | MARC1    | 0.669163097 | 2.55E-58    |
| AC006227.1 | MYH11    | 0.348358199 | 5.70E-14    |
| AC006227.1 | APOA1    | 0.506974793 | 4.81E-30    |
| AC006227.1 | TMEM178B | 0.422499924 | 1.96E-20    |
| AC006227.1 | CAPN6    | 0.282082683 | 1.79E-09    |
| AC006227.1 | PPM1L    | 0.604824877 | 3.82E-45    |
| AC006227.1 | FZD8     | 0.621798255 | 2.53E-48    |
| AC006227.1 | RCAN2    | 0.607694386 | 1.14E-45    |
| AC006227.1 | COPZ2    | 0.557826827 | 2.89E-37    |
| AC006227.1 | GAS1     | 0.24602221  | 1.78E-07    |
| AC006227.1 | DACT1    | 0.480730916 | 9.09E-27    |
| AC006227.1 | WBSCR17  | 0.655090574 | 3.67E-55    |
| AC006227.1 | NCS1     | 0.362056838 | 4.82E-15    |
| AC006227.1 | SPIRE2   | 0.502095149 | 2.05E-29    |
| AC006227.1 | C15orf52 | 0.347034715 | 7.19E-14    |
| AC006227.1 | SPAG5    | 0.452750685 | 1.43E-23    |
| AC006227.1 | ARL4D    | 0.477158461 | 2.42E-26    |
| AC006227.1 | FAM189A2 | 0.522891607 | 3.56E-32    |
| AC006227.1 | MAP1LC3A | 0.596571369 | 1.15E-43    |

|            |          |              |             |
|------------|----------|--------------|-------------|
| AC006227.1 | KLF6     | 0.078833275  | 0.099024913 |
| AC006227.1 | ADD3     | 0.403445794  | 1.30E-18    |
| AC006227.1 | TSPAN7   | 0.493205642  | 2.73E-28    |
| AC006227.1 | KLF9     | 0.477034779  | 2.50E-26    |
| AC006227.1 | KCNQ1    | 0.689507662  | 3.32E-63    |
| AC006227.1 | MAN1A1   | 0.140037176  | 0.00327958  |
| AC006227.1 | MLF1     | 0.323845604  | 3.54E-12    |
| AC006227.1 | RARB     | 0.647171801  | 1.86E-53    |
| AC006227.1 | CDC42EP2 | 0.516931749  | 2.30E-31    |
| AC006227.1 | FAM3B    | 0.231613817  | 9.30E-07    |
| AC006227.1 | GADD45B  | 0.275497689  | 4.36E-09    |
| AC006227.1 | TMEM47   | 0.523801493  | 2.67E-32    |
| AC006227.1 | SDF2L1   | 0.494921731  | 1.67E-28    |
| AC006227.1 | CCDC85A  | 0.35428118   | 1.99E-14    |
| AC006227.1 | CRYBG3   | 0.147326475  | 0.001968552 |
| AC006227.1 | FBLN2    | 0.082227015  | 0.085277983 |
| AC006227.1 | PEBP4    | 0.375390673  | 3.87E-16    |
| AC006227.1 | CDADC1   | 0.718236935  | 7.75E-71    |
| AC006227.1 | FAM63A   | 0.625980184  | 3.89E-49    |
| AC006227.1 | GLUL     | 0.363741581  | 3.53E-15    |
| AC006227.1 | FREM2    | 0.497720037  | 7.41E-29    |
| AC006227.1 | ACKR3    | 0.551982707  | 2.26E-36    |
| AC006227.1 | DENND6A  | 0.680340154  | 5.91E-61    |
| AC006227.1 | CLDN8    | 0.057659104  | 0.227952003 |
| AC006227.1 | UTS2R    | 0.1604314    | 0.000741638 |
| AC006227.1 | SCNN1B   | 0.453277043  | 1.25E-23    |
| AC006227.1 | TTC30A   | 0.576608913  | 2.91E-40    |
| AC006227.1 | CORO2B   | 0.645362383  | 4.48E-53    |
| AC006227.1 | TC2N     | 0.155115182  | 0.001112106 |
| AC006227.1 | ALDH2    | 0.567162695  | 9.89E-39    |
| AC006227.1 | GPR183   | 0.054674707  | 0.252975729 |
| AC006227.1 | C4orf47  | 0.528453896  | 6.03E-33    |
| AC006227.1 | SLC25A42 | 0.761726216  | 2.13E-84    |
| AC006227.1 | LGMN     | 0.522951604  | 3.49E-32    |
| AC006227.1 | ACSF2    | 0.577225763  | 2.30E-40    |
| AC006227.1 | KIAA1467 | 0.580495253  | 6.61E-41    |
| AC006227.1 | PRKG1    | 0.675562509  | 8.16E-60    |
| AC006227.1 | GNAI1    | 0.654014171  | 6.30E-55    |
| AC006227.1 | ABCC4    | 0.315014109  | 1.44E-11    |
| AC006227.1 | PRPS1    | 0.61158257   | 2.19E-46    |
| AC006227.1 | TSPAN5   | 0.238718728  | 4.17E-07    |
| AC006227.1 | CR2      | 0.274690249  | 4.86E-09    |
| AC006227.1 | CCDC170  | 0.488260629  | 1.11E-27    |
| AC006227.1 | RRAD     | -0.059083434 | 0.216649891 |
| AC006227.1 | SCGB2A1  | 0.493837101  | 2.28E-28    |
| AC006227.1 | SESN3    | 0.198807007  | 2.72E-05    |
| AC006227.1 | SGK223   | 0.237834514  | 4.62E-07    |
| AC006227.1 | NDRG2    | 0.723908438  | 1.86E-72    |
| AC006227.1 | C3orf52  | 0.27887299   | 2.77E-09    |
| AC006227.1 | FLRT3    | -0.230942359 | 1.00E-06    |
| AC006227.1 | MST1R    | -0.635051668 | 6.04E-51    |

|            |          |              |             |
|------------|----------|--------------|-------------|
| AC006227.1 | SDC1     | -0.311248756 | 2.57E-11    |
| AC006227.1 | ST8SIA4  | -0.548297492 | 8.10E-36    |
| AC006227.1 | UBTD1    | -0.291743867 | 4.62E-10    |
| AC006227.1 | EPHA2    | -0.376216591 | 3.30E-16    |
| AC006227.1 | TMEM130  | -0.180203919 | 0.000147022 |
| AC006227.1 | SPINK2   | -0.417674905 | 5.81E-20    |
| AC006227.1 | MMP16    | -0.561560975 | 7.58E-38    |
| AC006227.1 | SIGLEC15 | -0.484718528 | 3.01E-27    |
| AC006227.1 | RIN1     | -0.496942486 | 9.29E-29    |
| AC006227.1 | IL1RN    | -0.558644802 | 2.16E-37    |
| AC006227.1 | FCER1G   | -0.28780675  | 8.07E-10    |
| AC006227.1 | CD276    | -0.59259638  | 5.72E-43    |
| AC006227.1 | CTSB     | -0.376305523 | 3.24E-16    |
| AC006227.1 | FAM171A2 | -0.00571448  | 0.904965383 |
| AC006227.1 | ASPHD1   | -0.509083469 | 2.55E-30    |
| AC006227.1 | C15orf48 | -0.439975689 | 3.29E-22    |
| AC006227.1 | DYSF     | -0.066166218 | 0.166388922 |
| AC006227.1 | PDZRN4   | -0.083979981 | 0.078804478 |
| AC006227.1 | EFHD2    | -0.115361894 | 0.015593749 |
| AC006227.1 | ASF1B    | -0.354967672 | 1.76E-14    |
| AC006227.1 | AQP1     | 0.000793437  | 0.986774101 |
| AC006227.1 | ARRDC2   | -0.354962849 | 1.76E-14    |
| AC006227.1 | PRSS1    | -0.333136855 | 7.73E-13    |
| AC006227.1 | MAPK13   | -0.460476559 | 2.00E-24    |
| AC006227.1 | CST5     | -0.621680834 | 2.67E-48    |
| AC006227.1 | AHR      | -0.521121479 | 6.22E-32    |
| AC006227.1 | BAX      | -0.454112039 | 1.01E-23    |
| AC006227.1 | C1orf115 | -0.09832086  | 0.039478062 |
| AC006227.1 | PLK3     | -0.414173936 | 1.26E-19    |
| AC006227.1 | JAG2     | -0.13290716  | 0.005284523 |
| AC006227.1 | RAD23B   | -0.431267025 | 2.60E-21    |
| AC006227.1 | CA12     | 0.267617071  | 1.23E-08    |
| AC006227.1 | ADTRP    | -0.212982504 | 6.75E-06    |
| AC006227.1 | UCP2     | -0.311083232 | 2.64E-11    |
| AC006227.1 | IGFBP2   | -0.25372922  | 7.07E-08    |
| AC006227.1 | LOXL2    | -0.180761482 | 0.000140101 |
| AC006227.1 | GPX1     | -0.355886068 | 1.49E-14    |
| AC006227.1 | P3H3     | -0.36984271  | 1.12E-15    |
| AC006227.1 | C2orf81  | -0.291529835 | 4.77E-10    |
| AC006227.1 | CDT1     | -0.401653964 | 1.90E-18    |
| AC006227.1 | SNX25    | -0.154490248 | 0.001165394 |
| AC006227.1 | MTHFD1L  | -0.510362699 | 1.73E-30    |
| AC006227.1 | CDC42BPG | -0.578210063 | 1.58E-40    |
| AC006227.1 | MSN      | -0.464182908 | 7.65E-25    |
| AC006227.1 | SIGLEC6  | -0.379270085 | 1.82E-16    |
| AC006227.1 | F2R      | -0.148906541 | 0.001756997 |
| AC006227.1 | TMEM184A | -0.588796561 | 2.60E-42    |
| AC006227.1 | CKS2     | -0.279777911 | 2.45E-09    |
| AC006227.1 | TAX1BP3  | -0.582686638 | 2.84E-41    |
| AC006227.1 | PMEPA1   | -0.429056066 | 4.35E-21    |
| AC006227.1 | CXCL16   | -0.55739167  | 3.37E-37    |

|            |          |              |             |
|------------|----------|--------------|-------------|
| AC006227.1 | FAXC     | -0.652891813 | 1.10E-54    |
| AC006227.1 | VTCN1    | -0.628383258 | 1.31E-49    |
| AC006227.1 | SH2D4A   | -0.440284894 | 3.06E-22    |
| AC006227.1 | RNF24    | -0.356793826 | 1.26E-14    |
| AC006227.1 | LY6G6C   | -0.55503588  | 7.75E-37    |
| AC006227.1 | NID1     | -0.299354002 | 1.54E-10    |
| AC006227.1 | STAC     | -0.690230606 | 2.19E-63    |
| AC006227.1 | RAB34    | -0.473376088 | 6.72E-26    |
| AC006227.1 | HES4     | -0.268438734 | 1.11E-08    |
| AC006227.1 | EPHA10   | -0.586870978 | 5.55E-42    |
| AC006227.1 | ENTPD2   | -0.367428924 | 1.77E-15    |
| AC006227.1 | DDB2     | -0.52799718  | 6.98E-33    |
| AC006227.1 | NKAIN4   | -0.204467164 | 1.58E-05    |
| AC006227.1 | TRIM29   | -0.514981487 | 4.21E-31    |
| AC006227.1 | ADCY8    | -0.606488429 | 1.90E-45    |
| AC006227.1 | SFTA2    | -0.414673487 | 1.13E-19    |
| AC006227.1 | NRIP1    | -0.448222815 | 4.41E-23    |
| AC006227.1 | VWA1     | -0.018879245 | 0.693232989 |
| AC006227.1 | APLNR    | -0.02893437  | 0.545417884 |
| AC006227.1 | REN      | -0.382762509 | 9.12E-17    |
| AC006227.1 | EDIL3    | -0.102180109 | 0.032321476 |
| AC006227.1 | AGRN     | -0.381468824 | 1.18E-16    |
| AC006227.1 | TREM1    | -0.440619488 | 2.82E-22    |
| AC006227.1 | SRL      | -0.117230458 | 0.013981916 |
| AC006227.1 | RASGRF1  | -0.435062873 | 1.06E-21    |
| AC006227.1 | RMI2     | -0.44713081  | 5.77E-23    |
| AC006227.1 | SAMD1    | -0.462843113 | 1.08E-24    |
| AC006227.1 | MGAT4B   | -0.606666917 | 1.77E-45    |
| AC006227.1 | NXN      | -0.612249205 | 1.64E-46    |
| AC006227.1 | SH3BGRL3 | -0.516374045 | 2.74E-31    |
| AC006227.1 | CA11     | -0.168551423 | 0.000389816 |
| AC006227.1 | PLD3     | -0.103049288 | 0.030872181 |
| AC006227.1 | LURAP1L  | -0.475931711 | 3.37E-26    |
| AC006227.1 | CARNS1   | -0.139472663 | 0.003408538 |
| AC006227.1 | PDLIM7   | -0.393185572 | 1.11E-17    |
| AC006227.1 | BCL2L1   | -0.724238919 | 1.49E-72    |
| AC006227.1 | GGT6     | -0.172200186 | 0.000289162 |
| AC006227.1 | DPYSL3   | -0.29238483  | 4.22E-10    |
| AC006227.1 | FYN      | -0.465811766 | 5.00E-25    |
| AC006227.1 | TK1      | -0.342963419 | 1.46E-13    |
| AC006227.1 | AK1      | -0.106805138 | 0.025231464 |
| AC006227.1 | HIGD1B   | 0.174289874  | 0.000243035 |
| AC006227.1 | TMEM59L  | -0.458209858 | 3.58E-24    |
| AC006227.1 | MEGF9    | -0.340699272 | 2.16E-13    |
| AC006227.1 | ZFP36L1  | -0.437360069 | 6.17E-22    |
| AC006227.1 | ADRA1B   | -0.312495789 | 2.12E-11    |
| AC006227.1 | EPHA4    | -0.521431109 | 5.64E-32    |
| AC006227.1 | TCERG1L  | -0.046328437 | 0.332824134 |
| AC006227.1 | NGFR     | -0.220020467 | 3.26E-06    |
| AC006227.1 | EBI3     | -0.539786549 | 1.46E-34    |
| AC006227.1 | S100A10  | -0.638155776 | 1.41E-51    |

|            |          |              |             |
|------------|----------|--------------|-------------|
| AC006227.1 | S100B    | -0.426402859 | 8.03E-21    |
| AC006227.1 | CD44     | -0.046562752 | 0.330382132 |
| AC006227.1 | BHLHE41  | -0.364093054 | 3.30E-15    |
| AC006227.1 | FBXO2    | -0.357455071 | 1.12E-14    |
| AC006227.1 | SLC30A2  | -0.425273267 | 1.04E-20    |
| AC006227.1 | FRMD5    | -0.597853719 | 6.82E-44    |
| AC006227.1 | SAMD11   | -0.295633328 | 2.64E-10    |
| AC006227.1 | SIPA1L2  | -0.376835001 | 2.92E-16    |
| AC006227.1 | S100A16  | -0.619156962 | 8.14E-48    |
| AC006227.1 | PPL      | -0.660506628 | 2.34E-56    |
| AC006227.1 | ARHGDI3  | -0.089041301 | 0.062320687 |
| AC006227.1 | CDC42EP3 | -0.596137489 | 1.37E-43    |
| AC006227.1 | RUNX2    | -0.371585038 | 8.04E-16    |
| AC006227.1 | LAMC2    | -0.5840131   | 1.70E-41    |
| AC006227.1 | BRINP1   | -0.452478074 | 1.53E-23    |
| AC006227.1 | GPRC5B   | -0.349061002 | 5.04E-14    |
| AC006227.1 | AQP5     | -0.11459186  | 0.016304012 |
| AC006227.1 | PLAG1    | -0.213380783 | 6.48E-06    |
| AC006227.1 | PTPRU    | -0.603235449 | 7.42E-45    |
| AC006227.1 | ANGPTL4  | -0.535123934 | 6.86E-34    |
| AC006227.1 | PALM3    | -0.333787543 | 6.94E-13    |
| AC006227.1 | ACP5     | -0.360010836 | 7.02E-15    |
| AC006227.1 | DLG4     | -0.119273198 | 0.012389243 |
| AC006227.1 | ETNK2    | -0.354387274 | 1.95E-14    |
| AC006227.1 | CD109    | -0.501058319 | 2.79E-29    |
| AC006227.1 | SNX22    | -0.198446457 | 2.82E-05    |
| AC006227.1 | TMEM98   | -0.501313626 | 2.59E-29    |
| AC006227.1 | CTHRC1   | -0.445326499 | 8.99E-23    |
| AC006227.1 | S100A2   | -0.525405956 | 1.60E-32    |
| AC006227.1 | C11orf80 | -0.633331608 | 1.35E-50    |
| AC006227.1 | SREBF1   | -0.45394921  | 1.05E-23    |
| AC006227.1 | PRSS22   | -0.554866116 | 8.23E-37    |
| AC006227.1 | CMTM3    | -0.529894962 | 3.78E-33    |
| AC006227.1 | RDH5     | -0.330922999 | 1.12E-12    |
| AC006227.1 | MYH10    | -0.487682642 | 1.31E-27    |
| AC006227.1 | EVPL     | -0.507210367 | 4.48E-30    |
| AC006227.1 | SCD      | -0.432283714 | 2.05E-21    |
| AC006227.1 | CD151    | -0.489745665 | 7.32E-28    |
| AC006227.1 | S100A4   | -0.483038891 | 4.80E-27    |
| AC006227.1 | BNIP1    | -0.280145128 | 2.33E-09    |
| AC006227.1 | MAP3K6   | -0.543303687 | 4.46E-35    |
| AC006227.1 | MANEAL   | -0.345538616 | 9.34E-14    |
| AC006227.1 | CD207    | -0.384866808 | 6.00E-17    |
| AC006227.1 | CD1A     | -0.411479873 | 2.29E-19    |
| AC006227.1 | C3       | -0.410334544 | 2.94E-19    |
| AC006227.1 | NT5E     | -0.511309179 | 1.30E-30    |
| AC006227.1 | CACNG4   | -0.582528761 | 3.02E-41    |
| AC006227.1 | FHOD1    | -0.309154671 | 3.54E-11    |
| AC006227.1 | LEMD1    | -0.585522532 | 9.41E-42    |
| AC006227.1 | ATP11A   | -0.127216934 | 0.00761358  |
| AC006227.1 | PPAP2C   | -0.359394554 | 7.86E-15    |



|            |          |              |             |
|------------|----------|--------------|-------------|
| AC006227.1 | DRAM1    | -0.550169035 | 4.24E-36    |
| AC006227.1 | CDA      | -0.104597867 | 0.028427607 |
| AC006227.1 | CCND2    | -0.208037207 | 1.11E-05    |
| AC006227.1 | LCN6     | -0.160325295 | 0.000747751 |
| AC006227.1 | CDH4     | -0.384643708 | 6.27E-17    |
| AC006227.1 | MMP11    | -0.467045608 | 3.62E-25    |
| AC006227.1 | B3GAT1   | -0.298351639 | 1.78E-10    |
| AC006227.1 | SPP1     | -0.213502904 | 6.40E-06    |
| AC006227.1 | HLA-DQB1 | -0.383789848 | 7.44E-17    |
| AC006227.1 | SDC3     | -0.538614264 | 2.16E-34    |
| AC006227.1 | CX3CL1   | -0.370256307 | 1.04E-15    |
| AC006227.1 | SDK1     | -0.380880483 | 1.32E-16    |
| AC006227.1 | DOCK9    | -0.428549707 | 4.89E-21    |
| AC006227.1 | CSF2     | -0.517108074 | 2.18E-31    |
| AC006227.1 | GRHL3    | -0.636079988 | 3.74E-51    |
| AC006227.1 | TMEM92   | -0.639980733 | 5.93E-52    |
| AC006227.1 | BASP1    | -0.590256633 | 1.46E-42    |
| AC006227.1 | HRH1     | -0.615102261 | 4.79E-47    |
| AC006227.1 | ESM1     | 0.042401815  | 0.375465395 |
| AC006227.1 | B4GALNT3 | -0.553854675 | 1.17E-36    |
| AC006227.1 | LMO3     | -0.065043009 | 0.173716758 |
| AC006227.1 | C9orf16  | -0.557376777 | 3.39E-37    |
| AC006227.1 | SEMA3F   | -0.149970037 | 0.001626561 |
| AC006227.1 | PLA2G12B | -0.050041611 | 0.295489767 |
| AC006227.1 | KLK6     | -0.438948288 | 4.22E-22    |
| AC006227.1 | ST3GAL5  | -0.255688276 | 5.56E-08    |
| AC006227.1 | FAM132B  | 0.046940748  | 0.326467128 |
| AC006227.1 | CDKN1A   | -0.340666649 | 2.17E-13    |
| AC006227.1 | E2F1     | -0.424003257 | 1.39E-20    |
| AC006227.1 | B3GNT8   | -0.307129803 | 4.82E-11    |
| AC006227.1 | MTMR11   | -0.548204447 | 8.37E-36    |
| AC006227.1 | MYO1G    | -0.491026455 | 5.09E-28    |
| AC006227.1 | TMSB10   | -0.491332398 | 4.67E-28    |
| AC006227.1 | UNC5CL   | -0.602737317 | 9.13E-45    |
| AC006227.1 | ABR      | -0.548924555 | 6.53E-36    |
| AC006227.1 | PLP2     | -0.566962988 | 1.06E-38    |
| AC006227.1 | SRCIN1   | -0.344082657 | 1.20E-13    |
| AC006227.1 | PDE9A    | -0.5931877   | 4.51E-43    |
| AC006227.1 | TREM2    | -0.25751599  | 4.43E-08    |
| AC006227.1 | KDEL3    | -0.350476538 | 3.92E-14    |
| AC006227.1 | PC       | -0.473971946 | 5.72E-26    |
| AC006227.1 | C2CD4A   | -0.574835664 | 5.69E-40    |
| AC006227.1 | PELI1    | -0.537536727 | 3.09E-34    |
| AC006227.1 | SSX1     | -0.230522947 | 1.05E-06    |
| AC006227.1 | MROH6    | -0.52529972  | 1.66E-32    |
| AC006227.1 | ESPN     | -0.387184155 | 3.77E-17    |
| AC006227.1 | BMP1     | -0.247082727 | 1.57E-07    |
| AC006227.1 | TM4SF4   | -0.504227887 | 1.09E-29    |
| AC006227.1 | CORO2A   | -0.462728509 | 1.12E-24    |
| AC006227.1 | CD164L2  | -0.442984924 | 1.59E-22    |
| AC006227.1 | CTSS     | -0.405340881 | 8.64E-19    |

|            |          |              |             |
|------------|----------|--------------|-------------|
| AC006227.1 | CLU      | -0.484055722 | 3.62E-27    |
| AC006227.1 | TMSB4X   | -0.516277737 | 2.82E-31    |
| AC006227.1 | WNT10A   | -0.507671781 | 3.90E-30    |
| AC006227.1 | NAPSA    | -0.384950361 | 5.90E-17    |
| AC006227.1 | PLEKHA4  | -0.395556523 | 6.80E-18    |
| AC006227.1 | SFTPA1   | 0.023834472  | 0.618459659 |
| AC006227.1 | C1orf116 | -0.487083805 | 1.55E-27    |
| AC006227.1 | TM4SF1   | -0.501407238 | 2.52E-29    |
| AC006227.1 | SEL1L3   | -0.511006924 | 1.42E-30    |
| AC006227.1 | VASN     | -0.557755057 | 2.96E-37    |
| AC006227.1 | NPTXR    | -0.596337337 | 1.26E-43    |
| AC006227.1 | PDE4C    | -0.491051418 | 5.05E-28    |
| AC006227.1 | CDC42EP1 | -0.580229166 | 7.32E-41    |
| AC006227.1 | ENDOD1   | -0.599816321 | 3.05E-44    |
| AC006227.1 | RYR1     | -0.464990245 | 6.20E-25    |
| AC006227.1 | IL1RAP   | -0.527465149 | 8.28E-33    |
| AC006227.1 | SLC35F2  | -0.607315986 | 1.34E-45    |
| AC006227.1 | ISYNA1   | -0.29884892  | 1.66E-10    |
| AC006227.1 | HLA-G    | -0.550557101 | 3.71E-36    |
| AC006227.1 | CDKN2B   | -0.559227186 | 1.75E-37    |
| AC006227.1 | ALDH1A3  | -0.509778472 | 2.06E-30    |
| AC006227.1 | CLIP3    | -0.397119144 | 4.91E-18    |
| AC006227.1 | ULBP2    | -0.370283256 | 1.03E-15    |
| AC006227.1 | ETHE1    | -0.64123109  | 3.27E-52    |
| AC006227.1 | XPR1     | -0.525770761 | 1.43E-32    |
| AC006227.1 | SPTBN2   | -0.643384605 | 1.17E-52    |
| AC006227.1 | IVL      | -0.583937024 | 1.75E-41    |
| AC006227.1 | MARCO    | -0.443769977 | 1.31E-22    |
| AC006227.1 | PLXND1   | -0.177356679 | 0.000187646 |
| AC006227.1 | EMILIN2  | -0.364247373 | 3.21E-15    |
| AC006227.1 | PLAUR    | -0.550401364 | 3.92E-36    |
| AC006227.1 | CDC42EP5 | -0.538871273 | 1.98E-34    |
| AC006227.1 | TRPC5    | -0.135335808 | 0.004502945 |
| AC006227.1 | TMEM100  | -0.395885727 | 6.35E-18    |
| AC006227.1 | QSOX1    | -0.629070108 | 9.56E-50    |
| AC006227.1 | ARHGAP23 | -0.419451983 | 3.90E-20    |
| AC006227.1 | MDF1     | -0.296786465 | 2.24E-10    |
| AC006227.1 | FSTL3    | -0.594397146 | 2.77E-43    |
| AC006227.1 | INF2     | -0.439619819 | 3.59E-22    |
| AC006227.1 | TGFBR1   | -0.488931519 | 9.22E-28    |
| AC006227.1 | TGFBI    | -0.307718428 | 4.41E-11    |
| AC006227.1 | ERBB3    | -0.608301733 | 8.85E-46    |
| AC006227.1 | CCL18    | -0.323053727 | 4.03E-12    |
| AC006227.1 | CCL17    | -0.518454957 | 1.43E-31    |
| AC006227.1 | C16orf45 | -0.34034709  | 2.29E-13    |
| AC006227.1 | PRDM1    | -0.145194094 | 0.002291034 |
| AC006227.1 | TRIM47   | -0.594895845 | 2.27E-43    |
| AC006227.1 | CNFN     | -0.482601323 | 5.42E-27    |
| AC006227.1 | ARMCX3   | -0.270194537 | 8.80E-09    |
| AC006227.1 | RAMP1    | -0.299222661 | 1.57E-10    |
| AC006227.1 | GABRD    | 0.072672008  | 0.128431279 |

|            |           |              |             |
|------------|-----------|--------------|-------------|
| AC006227.1 | COL13A1   | -0.072743777 | 0.128053536 |
| AC006227.1 | S100A5    | -0.472415566 | 8.69E-26    |
| AC006227.1 | MISP      | -0.555903797 | 5.70E-37    |
| AC006227.1 | HES6      | -0.073306446 | 0.125121822 |
| AC006227.1 | PSD3      | -0.440484459 | 2.91E-22    |
| AC006227.1 | DOK7      | -0.564292335 | 2.82E-38    |
| AC006227.1 | ZMAT3     | -0.542603011 | 5.65E-35    |
| AC006227.1 | MFAP2     | -0.294662878 | 3.04E-10    |
| AC006227.1 | TMEM79    | -0.489484684 | 7.89E-28    |
| AC006227.1 | SLC1A5    | -0.398270011 | 3.86E-18    |
| AC006227.1 | BBC3      | -0.530134809 | 3.50E-33    |
| AC006227.1 | HLA-DQB2  | -0.405344569 | 8.64E-19    |
| AC006227.1 | C1QL1     | -0.359196123 | 8.15E-15    |
| AC006227.1 | TMEM215   | 0.004799125  | 0.920132579 |
| AC006227.1 | PNP       | -0.452920748 | 1.37E-23    |
| AC006227.1 | ARNTL     | -0.490183091 | 6.47E-28    |
| AC006227.1 | CLDN2     | -0.204087969 | 1.64E-05    |
| AC006227.1 | MVP       | -0.651624355 | 2.08E-54    |
| AC006227.1 | LGALS1    | -0.532254708 | 1.76E-33    |
| AC006227.1 | BIRC7     | -0.391474867 | 1.58E-17    |
| AC006227.1 | COL8A1    | -0.520199253 | 8.31E-32    |
| AC006227.1 | PERP      | -0.636726907 | 2.76E-51    |
| AC006227.1 | GJA4      | -0.118730103 | 0.012796235 |
| AC006227.1 | IGFL2     | -0.536772579 | 3.98E-34    |
| AC006227.1 | DAPK2     | -0.310778282 | 2.77E-11    |
| AC006227.1 | MAMLD1    | -0.52253049  | 3.99E-32    |
| AC006227.1 | ETV5      | -0.113720554 | 0.017141704 |
| AC006227.1 | RUNX1     | -0.714071034 | 1.13E-69    |
| AC006227.1 | LONRF2    | -0.179174748 | 0.000160645 |
| AC006227.1 | SPOCK1    | -0.090330885 | 0.058609161 |
| AC006227.1 | XKRX      | -0.343661259 | 1.29E-13    |
| AC006227.1 | TGFB1     | -0.2276011   | 1.45E-06    |
| AC006227.1 | ERP27     | -0.242501668 | 2.70E-07    |
| AC006227.1 | TNFRSF10C | -0.418580819 | 4.74E-20    |
| AC006227.1 | PALM      | -0.540304964 | 1.23E-34    |
| AC006227.1 | TSC22D1   | -0.287064374 | 8.96E-10    |
| AC006227.1 | TGM2      | -0.548804702 | 6.80E-36    |
| AC006227.1 | UBE2QL1   | -0.112297217 | 0.018591169 |
| AC006227.1 | ECE1      | -0.535515405 | 6.03E-34    |
| AC006227.1 | COL8A2    | -0.589675668 | 1.83E-42    |
| AC006227.1 | HIST3H2A  | -0.453899708 | 1.07E-23    |
| AC006227.1 | TNFRSF21  | -0.593081322 | 4.71E-43    |
| AC006227.1 | SOX4      | -0.60358139  | 6.43E-45    |
| AC006227.1 | ELF3      | -0.672602082 | 4.05E-59    |
| AC006227.1 | TPD52L1   | -0.447441434 | 5.34E-23    |
| AC006227.1 | INHBB     | -0.299306487 | 1.55E-10    |
| AC006227.1 | HPN       | -0.308884613 | 3.69E-11    |
| AC006227.1 | MMP7      | -0.47020313  | 1.57E-25    |
| AC006227.1 | RAB27A    | -0.392019103 | 1.41E-17    |
| AC006227.1 | IGF2BP2   | -0.405504703 | 8.34E-19    |
| AC006227.1 | ITGB4     | -0.564106103 | 3.02E-38    |

|            |            |              |             |
|------------|------------|--------------|-------------|
| AC006227.1 | PPP1R1B    | -0.468080878 | 2.75E-25    |
| AC006227.1 | NPDC1      | -0.235077766 | 6.31E-07    |
| AC006227.1 | CCL13      | -0.539120105 | 1.82E-34    |
| AC006227.1 | SPINT1     | -0.668028966 | 4.65E-58    |
| AC006227.1 | HEY2       | -0.130889383 | 0.00602454  |
| AC006227.1 | CST2       | -0.599964472 | 2.87E-44    |
| AC006227.1 | ADM        | -0.227569896 | 1.45E-06    |
| AC006227.1 | VSTM2L     | -0.521996189 | 4.72E-32    |
| AC006227.1 | FAM84A     | -0.500526145 | 3.26E-29    |
| AC006227.1 | P4HA2      | -0.416552121 | 7.46E-20    |
| AC006227.1 | LPL        | -0.297285023 | 2.08E-10    |
| AC006227.1 | TMEM173    | -0.419279368 | 4.06E-20    |
| AC006227.1 | DHRS3      | -0.398368872 | 3.79E-18    |
| AC006227.1 | SCN1B      | -0.509485294 | 2.25E-30    |
| AC006227.1 | GLT1D1     | -0.080272214 | 0.092995062 |
| AC006227.1 | PHYHIP     | -0.401802751 | 1.84E-18    |
| AC006227.1 | BHLHE40    | -0.501201716 | 2.67E-29    |
| AC006227.1 | BID        | -0.521434513 | 5.64E-32    |
| AC006227.1 | POSTN      | -0.373139149 | 5.97E-16    |
| AC006227.1 | ITGA3      | -0.729840071 | 3.39E-74    |
| AC006227.1 | RSP04      | -0.55560367  | 6.34E-37    |
| AC006227.1 | ADAMTS9    | -0.023980279 | 0.616313286 |
| AC006227.1 | ABTB2      | -0.681054305 | 3.97E-61    |
| AC006227.1 | KCNQ3      | -0.681564493 | 2.99E-61    |
| AC006227.1 | ANXA1      | -0.430469049 | 3.13E-21    |
| AC006227.1 | S100A11    | -0.622023067 | 2.29E-48    |
| AC006227.1 | CEACAM6    | -0.584046222 | 1.67E-41    |
| AC006227.1 | IER5L      | -0.505296982 | 7.94E-30    |
| AC006227.1 | KRT80      | -0.611426124 | 2.34E-46    |
| AC006227.1 | CDH6       | -0.619900898 | 5.86E-48    |
| AC006227.1 | UNC5B      | -0.434523324 | 1.21E-21    |
| AC006227.1 | PLEKHN1    | -0.631135542 | 3.71E-50    |
| AC006227.1 | SYTL1      | -0.423624977 | 1.52E-20    |
| AC006227.1 | TMEM163    | -0.542279055 | 6.31E-35    |
| AC006227.1 | C4orf48    | -0.222884019 | 2.40E-06    |
| AC006227.1 | B3GNT7     | -0.291727698 | 4.63E-10    |
| AC006227.1 | BAIAP3     | -0.386039812 | 4.74E-17    |
| AC006227.1 | PHLDA2     | -0.533856051 | 1.04E-33    |
| AC006227.1 | GAP43      | -0.55690593  | 4.00E-37    |
| AC006227.1 | S100A1     | -0.440840896 | 2.67E-22    |
| AC006227.1 | PTPRE      | -0.612735565 | 1.33E-46    |
| AC006227.1 | CCND1      | -0.469286495 | 2.00E-25    |
| AC006227.1 | ST6GALNAC5 | -0.716059106 | 3.17E-70    |
| AC006227.1 | KRT17      | -0.248078708 | 1.40E-07    |
| AC006227.1 | HPCAL4     | -0.21247884  | 7.10E-06    |
| AC006227.1 | GABBR2     | -0.228659773 | 1.29E-06    |
| AC006227.1 | DIRAS3     | -0.259921692 | 3.28E-08    |
| AC006227.1 | SERINC2    | -0.421139705 | 2.67E-20    |
| AC006227.1 | PTCHD4     | -0.381952347 | 1.07E-16    |
| AC006227.1 | EPS8       | -0.306103894 | 5.63E-11    |
| AC006227.1 | LY6E       | -0.55911329  | 1.82E-37    |

|            |         |              |             |
|------------|---------|--------------|-------------|
| AC006227.1 | UPP1    | -0.623373216 | 1.25E-48    |
| AC006227.1 | AHNAK2  | -0.666256852 | 1.18E-57    |
| AC006227.1 | PLXNC1  | -0.297759894 | 1.94E-10    |
| AC006227.1 | TNC     | -0.579132055 | 1.11E-40    |
| AC006227.1 | DUSP4   | -0.369108276 | 1.29E-15    |
| AC006227.1 | NRCAM   | -0.405590514 | 8.19E-19    |
| AC006227.1 | NRP2    | -0.337986209 | 3.42E-13    |
| AC006227.1 | CTSC    | -0.562924173 | 4.63E-38    |
| AC006227.1 | AMIG02  | -0.312003756 | 2.29E-11    |
| AC006227.1 | NAB2    | -0.310530067 | 2.87E-11    |
| AC006227.1 | TBC1D2  | -0.667656501 | 5.66E-58    |
| AC006227.1 | PHLDA3  | -0.555436302 | 6.73E-37    |
| AC006227.1 | PTP4A3  | -0.406085952 | 7.36E-19    |
| AC006227.1 | CRABP2  | -0.221026802 | 2.93E-06    |
| AC006227.1 | GOS2    | -0.36273709  | 4.25E-15    |
| AC006227.1 | S100A6  | -0.678753846 | 1.42E-60    |
| AC006227.1 | FOXQ1   | -0.458832524 | 3.05E-24    |
| AC006227.1 | LRG1    | -0.471477738 | 1.12E-25    |
| AC006227.1 | LAMP5   | -0.417459312 | 6.10E-20    |
| AC006227.1 | ALDH3B1 | -0.623044862 | 1.45E-48    |
| AC006227.1 | CDH2    | 0.050974599  | 0.286566381 |
| AC006227.1 | SCG5    | -0.121786695 | 0.010650776 |
| AC006227.1 | ZCCHC16 | -0.119319122 | 0.012355357 |
| AC006227.1 | GRB7    | -0.56916643  | 4.73E-39    |
| AC006227.1 | TIAM1   | -0.401285187 | 2.05E-18    |
| AC006227.1 | FXYD5   | -0.327890377 | 1.84E-12    |
| AC006227.1 | CLDN9   | -0.412123821 | 1.99E-19    |
| AC006227.1 | FAM43A  | -0.448773285 | 3.84E-23    |
| AC006227.1 | CHST2   | -0.457550315 | 4.23E-24    |
| AC006227.1 | HMGA2   | -0.362136409 | 4.75E-15    |
| AC006227.1 | GALNT7  | -0.419969264 | 3.47E-20    |
| AC006227.1 | CBLN1   | -0.443953514 | 1.26E-22    |
| AC006227.1 | STRA6   | -0.52071937  | 7.06E-32    |
| AC006227.1 | MUC21   | -0.565171653 | 2.05E-38    |
| AC006227.1 | PRR36   | -0.440964436 | 2.60E-22    |
| AC006227.1 | NFE2L3  | -0.616023919 | 3.21E-47    |
| AC006227.1 | NR1D1   | -0.281620093 | 1.90E-09    |
| AC006227.1 | MUC1    | -0.666612296 | 9.81E-58    |
| AC006227.1 | NAT8L   | -0.10301553  | 0.030927413 |
| AC006227.1 | APOC1   | -0.098981538 | 0.038165409 |
| AC006227.1 | EVA1A   | -0.684258833 | 6.60E-62    |
| AC006227.1 | ENTPD1  | -0.037825437 | 0.429204148 |
| AC006227.1 | COL1A1  | -0.431599066 | 2.41E-21    |
| AC006227.1 | FNDC4   | -0.442893281 | 1.63E-22    |
| AC006227.1 | FRMD3   | 0.078866465  | 0.098882409 |
| AC006227.1 | SHROOM4 | -0.400706349 | 2.32E-18    |
| AC006227.1 | NELL2   | -0.244653765 | 2.10E-07    |
| AC006227.1 | EPHB3   | -0.640195111 | 5.36E-52    |
| AC006227.1 | TMC6    | -0.561411479 | 8.00E-38    |
| AC006227.1 | NOD1    | -0.384187418 | 6.87E-17    |
| AC006227.1 | GGCT    | -0.50410867  | 1.13E-29    |

|            |           |              |             |
|------------|-----------|--------------|-------------|
| AC006227.1 | ICAM1     | -0.502368044 | 1.90E-29    |
| AC006227.1 | PRSS23    | -0.462878714 | 1.07E-24    |
| AC006227.1 | CFI       | -0.502633137 | 1.75E-29    |
| AC006227.1 | CD55      | -0.630533726 | 4.89E-50    |
| AC006227.1 | RASD2     | -0.472331173 | 8.89E-26    |
| AC006227.1 | KLK11     | -0.306795778 | 5.07E-11    |
| AC006227.1 | ICAM5     | -0.373682243 | 5.38E-16    |
| AC006227.1 | ADORA1    | -0.501278875 | 2.61E-29    |
| AC006227.1 | ITGA2     | -0.597522671 | 7.81E-44    |
| AC006227.1 | ABCC3     | -0.332006635 | 9.33E-13    |
| AC006227.1 | MFGE8     | -0.561028235 | 9.18E-38    |
| AC006227.1 | STK32A    | -0.257022397 | 4.71E-08    |
| AC006227.1 | CYSLTR2   | -0.312241901 | 2.21E-11    |
| AC006227.1 | LAD1      | -0.596190961 | 1.34E-43    |
| AC006227.1 | MGAT3     | -0.617546684 | 1.65E-47    |
| AC006227.1 | IGFBP6    | -0.42774393  | 5.90E-21    |
| AC006227.1 | CYP2S1    | -0.661735364 | 1.24E-56    |
| AC006227.1 | KCNJ2     | -0.418845771 | 4.47E-20    |
| AC006227.1 | FAM20A    | -0.495085978 | 1.59E-28    |
| AC006227.1 | TGFA      | -0.373055607 | 6.07E-16    |
| AC006227.1 | MXRA8     | -0.542527554 | 5.80E-35    |
| AC006227.1 | C8orf4    | -0.424818821 | 1.16E-20    |
| AC006227.1 | CLDN10    | -0.530070161 | 3.57E-33    |
| AC006227.1 | PDE5A     | -0.459144424 | 2.82E-24    |
| AC006227.1 | APOE      | -0.088685006 | 0.063379631 |
| AC006227.1 | SPOCK2    | -0.553373138 | 1.39E-36    |
| AC006227.1 | TENM1     | -0.000329772 | 0.994502793 |
| AC006227.1 | SLIT1     | -0.08314768  | 0.081826591 |
| AC006227.1 | CXCL14    | -0.298542126 | 1.73E-10    |
| AC006227.1 | ECM1      | -0.065057334 | 0.173621809 |
| AC006227.1 | DUSP5     | -0.616252987 | 2.91E-47    |
| AC006227.1 | SEZ6L2    | -0.383858356 | 7.34E-17    |
| AC006227.1 | THRSP     | -0.040654664 | 0.395473802 |
| AC006227.1 | C19orf33  | -0.645743784 | 3.72E-53    |
| AC006227.1 | MPZL2     | -0.460586625 | 1.94E-24    |
| AC006227.1 | CTSH      | -0.499720226 | 4.13E-29    |
| AC006227.1 | CYP1B1    | -0.526515549 | 1.12E-32    |
| AC006227.1 | ALOX5     | -0.613810124 | 8.39E-47    |
| AC006227.1 | SYTL5     | -0.533977979 | 9.99E-34    |
| AC006227.1 | TNFRSF12A | -0.499178124 | 4.84E-29    |
| AC006227.1 | DUSP6     | -0.456112795 | 6.10E-24    |
| AC006227.1 | ALOX15B   | -0.568466321 | 6.12E-39    |
| AC006227.1 | SDC4      | -0.560353657 | 1.17E-37    |
| AC006227.1 | MDK       | -0.424410755 | 1.27E-20    |
| AC006227.1 | KRT19     | -0.711755541 | 4.93E-69    |
| AC006227.1 | MET       | -0.61528126  | 4.43E-47    |
| AC006227.1 | TESC      | -0.104346815 | 0.028812251 |
| AC006227.1 | CXCL17    | -0.610558102 | 3.39E-46    |
| AC006227.1 | NPC2      | -0.362245766 | 4.65E-15    |
| AC006227.1 | COMP      | -0.436918388 | 6.85E-22    |
| AC006227.1 | TUSC3     | -0.406980945 | 6.07E-19    |

|            |          |              |             |
|------------|----------|--------------|-------------|
| AC006227.1 | TMPRSS4  | -0.704752753 | 3.86E-67    |
| AC006227.1 | LGALS3   | -0.615834425 | 3.49E-47    |
| AC006227.1 | CRLF1    | -0.514426903 | 4.99E-31    |
| AC006227.1 | CTXN1    | -0.586193564 | 7.24E-42    |
| AC006227.1 | PCSK1N   | -0.271558727 | 7.36E-09    |
| AC006227.1 | NMU      | -0.411931548 | 2.07E-19    |
| AC006227.1 | GALE     | -0.456392214 | 5.68E-24    |
| AC006227.1 | PCSK2    | -0.008856317 | 0.85320157  |
| AC006227.1 | GJB3     | -0.49004948  | 6.72E-28    |
| AC006227.1 | SLPI     | -0.617948934 | 1.38E-47    |
| AC006227.1 | AGR2     | -0.181802283 | 0.000127994 |
| AC006227.1 | MRC2     | -0.525765088 | 1.43E-32    |
| AC006227.1 | GOLT1A   | -0.35915031  | 8.22E-15    |
| AC006227.1 | SLC27A6  | -0.524687853 | 2.01E-32    |
| AC006227.1 | KCNN4    | -0.703043047 | 1.10E-66    |
| AC006227.1 | ETV4     | -0.339987474 | 2.43E-13    |
| AC006227.1 | SYT12    | -0.613471984 | 9.70E-47    |
| AC006227.1 | PVRL4    | -0.660811295 | 2.00E-56    |
| AC006227.1 | PLCD3    | -0.55116147  | 3.01E-36    |
| AC006227.1 | PLAU     | -0.579451757 | 9.86E-41    |
| AC006227.1 | LRRK2    | -0.002677178 | 0.955394962 |
| AC006227.1 | SFN      | -0.629983823 | 6.29E-50    |
| AC006227.1 | LPAR5    | -0.469180542 | 2.06E-25    |
| AC006227.1 | NGEF     | -0.601139237 | 1.77E-44    |
| AC006227.1 | DTX4     | -0.487225359 | 1.49E-27    |
| AC006227.1 | CST6     | -0.559455685 | 1.61E-37    |
| AC006227.1 | QPCT     | -0.378924122 | 1.94E-16    |
| AC006227.1 | TIMP1    | -0.515800029 | 3.27E-31    |
| AC006227.1 | CAMK2N1  | -0.520037275 | 8.75E-32    |
| AC006227.1 | KLHDC8A  | -0.121541884 | 0.010810039 |
| AC006227.1 | PDLIM4   | -0.656776877 | 1.57E-55    |
| AC006227.1 | SCEL     | -0.47342105  | 6.64E-26    |
| AC006227.1 | LCN2     | -0.686015913 | 2.44E-62    |
| AC006227.1 | PROS1    | -0.640824018 | 3.97E-52    |
| AC006227.1 | GABRB2   | -0.555704091 | 6.12E-37    |
| AC006227.1 | TMPRSS6  | -0.628111005 | 1.48E-49    |
| AC006227.1 | KLK7     | -0.473997425 | 5.68E-26    |
| AC006227.1 | PDZK1IP1 | -0.488879039 | 9.36E-28    |
| AC006227.1 | CDH3     | -0.430359976 | 3.21E-21    |
| AC006227.1 | LRP4     | -0.188956269 | 6.78E-05    |
| AC006227.1 | IGSF1    | -0.227644502 | 1.44E-06    |
| AC006227.1 | B3GNT3   | -0.706223321 | 1.56E-67    |
| AC006227.1 | CLDN1    | -0.584972487 | 1.17E-41    |
| AC006227.1 | GDF15    | -0.595718218 | 1.63E-43    |
| AC006227.1 | ARHGAP36 | -0.217555978 | 4.21E-06    |
| AC006227.1 | LAMB3    | -0.592832823 | 5.20E-43    |
| AC006227.1 | KLK10    | -0.474458022 | 5.02E-26    |
| AC006227.1 | DPP4     | -0.522919407 | 3.53E-32    |
| AC006227.1 | METTL7B  | -0.384495347 | 6.46E-17    |
| AC006227.1 | LIPH     | -0.640471694 | 4.70E-52    |
| AC006227.1 | CLDN16   | -0.536270404 | 4.70E-34    |

|              |           |              |             |
|--------------|-----------|--------------|-------------|
| AC006227.1   | CHI3L1    | -0.519486095 | 1.04E-31    |
| AC006227.1   | SLC22A31  | -0.474129057 | 5.49E-26    |
| AC006227.1   | TACSTD2   | -0.630675989 | 4.58E-50    |
| AC006227.1   | SFTPB     | -0.558159719 | 2.56E-37    |
| AC006227.1   | RXRG      | -0.221319271 | 2.84E-06    |
| AC006227.1   | DCSTAMP   | -0.596480766 | 1.19E-43    |
| AC006227.1   | CITED1    | -0.306813222 | 5.06E-11    |
| AC006227.1   | SERPINA1  | -0.656180735 | 2.12E-55    |
| AC006227.1   | PRR15     | -0.30468538  | 6.97E-11    |
| AC006227.1   | SLC34A2   | -0.623483423 | 1.19E-48    |
| AC006227.1   | FN1       | -0.744051169 | 1.48E-78    |
| AC006227.1   | ZCCHC12   | -0.163592368 | 0.000579402 |
| RP11-16005.1 | TFF3      | 0.555691782  | 0           |
| RP11-16005.1 | CCL21     | 0.475724815  | 3.57E-26    |
| RP11-16005.1 | TPO       | 0.552693629  | 0           |
| RP11-16005.1 | MT1G      | 0.542842331  | 0           |
| RP11-16005.1 | DIO1      | 0.495944451  | 0           |
| RP11-16005.1 | DPT       | 0.459126602  | 2.83E-24    |
| RP11-16005.1 | CDH16     | 0.555907517  | 0           |
| RP11-16005.1 | CRABP1    | 0.419821328  | 3.59E-20    |
| RP11-16005.1 | SLC26A7   | 0.469206308  | 0           |
| RP11-16005.1 | MT1H      | 0.539010536  | 1.89E-34    |
| RP11-16005.1 | SLC26A4   | 0.512719387  | 0           |
| RP11-16005.1 | SLC5A8    | 0.548016622  | 8.93E-36    |
| RP11-16005.1 | PKHD1L1   | 0.458654355  | 3.19E-24    |
| RP11-16005.1 | TFCP2L1   | 0.500319701  | 0           |
| RP11-16005.1 | WSCD2     | 0.559167166  | 1.79E-37    |
| RP11-16005.1 | IPCEF1    | 0.535024268  | 0           |
| RP11-16005.1 | SLC5A5    | 0.513825066  | 6.01E-31    |
| RP11-16005.1 | MT1F      | 0.571190042  | 0           |
| RP11-16005.1 | FOSB      | 0.28553474   | 1.32E-09    |
| RP11-16005.1 | SEMA3D    | 0.51934093   | 1.09E-31    |
| RP11-16005.1 | BMP8A     | 0.510069869  | 0           |
| RP11-16005.1 | MATN2     | 0.456131761  | 0           |
| RP11-16005.1 | PLA2R1    | 0.442464761  | 0           |
| RP11-16005.1 | COL23A1   | 0.603766627  | 0           |
| RP11-16005.1 | HGD       | 0.655645827  | 0           |
| RP11-16005.1 | TCEAL2    | 0.520091797  | 0           |
| RP11-16005.1 | CHRD1     | 0.426101168  | 8.61E-21    |
| RP11-16005.1 | TNFRSF11B | 0.447408352  | 0           |
| RP11-16005.1 | FAM167A   | 0.483972972  | 0           |
| RP11-16005.1 | KIT       | 0.423540709  | 0           |
| RP11-16005.1 | SLC4A4    | 0.535013914  | 0           |
| RP11-16005.1 | SMOC2     | 0.418068632  | 0           |
| RP11-16005.1 | FHL1      | 0.51928985   | 0           |
| RP11-16005.1 | OTOS      | 0.659240405  | 0           |
| RP11-16005.1 | IGFBPL1   | 0.467560212  | 3.16E-25    |
| RP11-16005.1 | HBB       | 0.305389811  | 7.86E-11    |
| RP11-16005.1 | BEX1      | 0.430341374  | 0           |
| RP11-16005.1 | FABP4     | 0.409919438  | 3.21E-19    |
| RP11-16005.1 | LMOD1     | 0.521908589  | 0           |



|              |            |             |          |
|--------------|------------|-------------|----------|
| RP11-16005.1 | SOD3       | 0.604606303 | 0        |
| RP11-16005.1 | TMEM171    | 0.494916415 | 0        |
| RP11-16005.1 | PI16       | 0.428163039 | 0        |
| RP11-16005.1 | ZMAT4      | 0.609800835 | 4.68E-46 |
| RP11-16005.1 | MFAP4      | 0.397129784 | 0        |
| RP11-16005.1 | CWH43      | 0.507858079 | 3.68E-30 |
| RP11-16005.1 | SPX        | 0.548213703 | 0        |
| RP11-16005.1 | APOD       | 0.309649038 | 4.17E-11 |
| RP11-16005.1 | DPP6       | 0.589162367 | 0        |
| RP11-16005.1 | MMRN1      | 0.460880468 | 0        |
| RP11-16005.1 | WDR72      | 0.362638823 | 5.24E-15 |
| RP11-16005.1 | MPPED2     | 0.574400951 | 0        |
| RP11-16005.1 | PAPSS2     | 0.468831149 | 0        |
| RP11-16005.1 | DCN        | 0.345502061 | 1.28E-13 |
| RP11-16005.1 | SORBS2     | 0.51621014  | 0        |
| RP11-16005.1 | EGR2       | 0.219921167 | 3.48E-06 |
| RP11-16005.1 | EDN3       | 0.463735614 | 8.60E-25 |
| RP11-16005.1 | DIO2       | 0.441343113 | 0        |
| RP11-16005.1 | ITPR1      | 0.551589994 | 0        |
| RP11-16005.1 | CFD        | 0.476292349 | 0        |
| RP11-16005.1 | CPXM1      | 0.486079537 | 0        |
| RP11-16005.1 | ELMO1      | 0.617845948 | 0        |
| RP11-16005.1 | GPC3       | 0.470028625 | 1.64E-25 |
| RP11-16005.1 | MYOC       | 0.240880222 | 3.26E-07 |
| RP11-16005.1 | DEPTOR     | 0.450134603 | 0        |
| RP11-16005.1 | DGKI       | 0.38389723  | 0        |
| RP11-16005.1 | CARTPT     | 0.55214598  | 2.13E-36 |
| RP11-16005.1 | IYD        | 0.362191611 | 5.74E-15 |
| RP11-16005.1 | LYVE1      | 0.424258405 | 0        |
| RP11-16005.1 | CLCNKB     | 0.48036889  | 0        |
| RP11-16005.1 | NCAM1      | 0.452647532 | 0        |
| RP11-16005.1 | HBA2       | 0.301613539 | 1.37E-10 |
| RP11-16005.1 | GLT8D2     | 0.550711171 | 0        |
| RP11-16005.1 | OGDHL      | 0.459915976 | 0        |
| RP11-16005.1 | LIFR       | 0.380293291 | 5.10E-17 |
| RP11-16005.1 | CSGALNACT1 | 0.271318688 | 8.73E-09 |
| RP11-16005.1 | RAP1GAP    | 0.373467804 | 4.69E-16 |
| RP11-16005.1 | COL9A3     | 0.544938826 | 0        |
| RP11-16005.1 | FBLN1      | 0.343390815 | 1.85E-13 |
| RP11-16005.1 | EFEMP1     | 0.435792175 | 0        |
| RP11-16005.1 | AOX1       | 0.513522912 | 6.59E-31 |
| RP11-16005.1 | GRIN2C     | 0.523844949 | 0        |
| RP11-16005.1 | C11orf74   | 0.572441187 | 0        |
| RP11-16005.1 | PPARGC1A   | 0.523430501 | 0        |
| RP11-16005.1 | ANGPTL1    | 0.468887316 | 0        |
| RP11-16005.1 | SCARA5     | 0.422642558 | 1.90E-20 |
| RP11-16005.1 | LTF        | 0.543724558 | 0        |
| RP11-16005.1 | CA4        | 0.390616974 | 1.88E-17 |
| RP11-16005.1 | TG         | 0.343566268 | 1.79E-13 |
| RP11-16005.1 | FCGBP      | 0.454274971 | 0        |
| RP11-16005.1 | PBX4       | 0.589289595 | 0        |

|              |          |             |          |
|--------------|----------|-------------|----------|
| RP11-16005.1 | CYR61    | 0.322704011 | 5.61E-12 |
| RP11-16005.1 | FOS      | 0.317564685 | 1.25E-11 |
| RP11-16005.1 | KHDRBS2  | 0.487177356 | 0        |
| RP11-16005.1 | MUM1L1   | 0.468251318 | 0        |
| RP11-16005.1 | RGS16    | 0.540626977 | 0        |
| RP11-16005.1 | MT1M     | 0.469823725 | 0        |
| RP11-16005.1 | LRP2     | 0.405162304 | 0        |
| RP11-16005.1 | MAFB     | 0.548320365 | 0        |
| RP11-16005.1 | KCNK2    | 0.403297571 | 0        |
| RP11-16005.1 | TBC1D4   | 0.607560061 | 0        |
| RP11-16005.1 | MIOX     | 0.567975465 | 7.33E-39 |
| RP11-16005.1 | TPPP     | 0.385295319 | 0        |
| RP11-16005.1 | FMOD     | 0.505353643 | 0        |
| RP11-16005.1 | CITED2   | 0.317552345 | 1.25E-11 |
| RP11-16005.1 | RGS8     | 0.545738498 | 1.95E-35 |
| RP11-16005.1 | ABI3BP   | 0.438209788 | 0        |
| RP11-16005.1 | ADH1B    | 0.434519624 | 1.21E-21 |
| RP11-16005.1 | OGN      | 0.381391107 | 1.20E-16 |
| RP11-16005.1 | NR4A1    | 0.213982163 | 6.41E-06 |
| RP11-16005.1 | FOXJ1    | 0.540114551 | 1.31E-34 |
| RP11-16005.1 | ALDH1A1  | 0.521280108 | 0        |
| RP11-16005.1 | OCA2     | 0.432897433 | 1.77E-21 |
| RP11-16005.1 | TMEM139  | 0.40667287  | 0        |
| RP11-16005.1 | ARHGAP24 | 0.668515419 | 0        |
| RP11-16005.1 | SLC25A15 | 0.347620966 | 8.81E-14 |
| RP11-16005.1 | DES      | 0.330392376 | 1.22E-12 |
| RP11-16005.1 | GDF10    | 0.471996279 | 9.73E-26 |
| RP11-16005.1 | KIAA1324 | 0.677711146 | 0        |
| RP11-16005.1 | JUN      | 0.364648088 | 3.48E-15 |
| RP11-16005.1 | C7       | 0.302723557 | 1.16E-10 |
| RP11-16005.1 | LGI3     | 0.584810662 | 0        |
| RP11-16005.1 | CDON     | 0.571357552 | 0        |
| RP11-16005.1 | BCL2     | 0.410226599 | 0        |
| RP11-16005.1 | HLF      | 0.552934894 | 0        |
| RP11-16005.1 | EGR1     | 0.290483012 | 6.66E-10 |
| RP11-16005.1 | IP6K3    | 0.44157842  | 0        |
| RP11-16005.1 | SCUBE3   | 0.370063004 | 1.07E-15 |
| RP11-16005.1 | PKNOX2   | 0.482691757 | 0        |
| RP11-16005.1 | SMAD9    | 0.288551049 | 8.71E-10 |
| RP11-16005.1 | IQGAP2   | 0.419380484 | 0        |
| RP11-16005.1 | GNA14    | 0.499580588 | 0        |
| RP11-16005.1 | LAYN     | 0.494632599 | 0        |
| RP11-16005.1 | AVPR1A   | 0.455772771 | 0        |
| RP11-16005.1 | PDLIM3   | 0.526651622 | 0        |
| RP11-16005.1 | GPM6A    | 0.420032793 | 0        |
| RP11-16005.1 | SDPR     | 0.292122933 | 5.30E-10 |
| RP11-16005.1 | CRYAB    | 0.26767319  | 1.39E-08 |
| RP11-16005.1 | FOXA2    | 0.4363967   | 7.76E-22 |
| RP11-16005.1 | C8orf88  | 0.496335638 | 0        |
| RP11-16005.1 | ISM1     | 0.524399249 | 0        |
| RP11-16005.1 | BMP2     | 0.295830556 | 3.14E-10 |

|              |          |             |             |
|--------------|----------|-------------|-------------|
| RP11-16005.1 | ID4      | 0.4063031   | 0           |
| RP11-16005.1 | NUPR1    | 0.482255891 | 0           |
| RP11-16005.1 | SERTM1   | 0.468637204 | 2.38E-25    |
| RP11-16005.1 | IRS1     | 0.543127991 | 0           |
| RP11-16005.1 | FIBIN    | 0.423785945 | 0           |
| RP11-16005.1 | PODN     | 0.344930599 | 1.41E-13    |
| RP11-16005.1 | TDRD9    | 0.37751924  | 1.48E-16    |
| RP11-16005.1 | EPHA3    | 0.462277422 | 0           |
| RP11-16005.1 | AIF1L    | 0.226133917 | 1.81E-06    |
| RP11-16005.1 | EBF4     | 0.564061875 | 0           |
| RP11-16005.1 | ADM2     | 0.54251256  | 0           |
| RP11-16005.1 | GSTM3    | 0.499615196 | 0           |
| RP11-16005.1 | HSD17B6  | 0.248900337 | 1.40E-07    |
| RP11-16005.1 | AGR3     | 0.34572031  | 9.05E-14    |
| RP11-16005.1 | EPHB1    | 0.400098009 | 0           |
| RP11-16005.1 | TMOD1    | 0.524663775 | 0           |
| RP11-16005.1 | WASF3    | 0.463135679 | 0           |
| RP11-16005.1 | SELV     | 0.563980443 | 3.16E-38    |
| RP11-16005.1 | ENPP1    | 0.369188578 | 1.31E-15    |
| RP11-16005.1 | SYNE1    | 0.547882178 | 9.35E-36    |
| RP11-16005.1 | PLCH1    | 0.605013233 | 0           |
| RP11-16005.1 | CCDC146  | 0.514634755 | 0           |
| RP11-16005.1 | SLC16A2  | 0.534359194 | 0           |
| RP11-16005.1 | IER2     | 0.461241018 | 0           |
| RP11-16005.1 | KCNAB1   | 0.433715679 | 0           |
| RP11-16005.1 | SYNDIG1  | 0.518100404 | 0           |
| RP11-16005.1 | C16orf89 | 0.530046494 | 0           |
| RP11-16005.1 | CTGF     | 0.196107989 | 3.64E-05    |
| RP11-16005.1 | NR4A3    | 0.16983493  | 0.000357659 |
| RP11-16005.1 | KIAA1456 | 0.445654819 | 0           |
| RP11-16005.1 | AQP4     | 0.484090271 | 0           |
| RP11-16005.1 | RNF150   | 0.473960547 | 0           |
| RP11-16005.1 | C1S      | 0.351465603 | 4.41E-14    |
| RP11-16005.1 | PFKFB2   | 0.393284012 | 0           |
| RP11-16005.1 | PROX1    | 0.459719531 | 0           |
| RP11-16005.1 | TCF7L1   | 0.549659591 | 0           |
| RP11-16005.1 | HSPB6    | 0.389082796 | 0           |
| RP11-16005.1 | FHDC1    | 0.370669216 | 9.30E-16    |
| RP11-16005.1 | PRR15L   | 0.478293387 | 0           |
| RP11-16005.1 | SLC1A1   | 0.428827971 | 0           |
| RP11-16005.1 | BTBD11   | 0.485204969 | 0           |
| RP11-16005.1 | TRIM58   | 0.344656286 | 1.48E-13    |
| RP11-16005.1 | LRIG1    | 0.481915057 | 0           |
| RP11-16005.1 | ROR2     | 0.314328671 | 2.06E-11    |
| RP11-16005.1 | GPR125   | 0.437385006 | 0           |
| RP11-16005.1 | FLRT1    | 0.525280341 | 0           |
| RP11-16005.1 | PGF      | 0.436213431 | 0           |
| RP11-16005.1 | DUSP1    | 0.23328265  | 8.31E-07    |
| RP11-16005.1 | PLA2G7   | 0.327347617 | 2.68E-12    |
| RP11-16005.1 | PLSCR4   | 0.423416034 | 0           |
| RP11-16005.1 | FAM46B   | 0.418670163 | 0           |

|              |          |             |             |
|--------------|----------|-------------|-------------|
| RP11-16005.1 | GLDC     | 0.471875257 | 0           |
| RP11-16005.1 | ZBTB16   | 0.304882601 | 8.47E-11    |
| RP11-16005.1 | OMD      | 0.322074224 | 4.71E-12    |
| RP11-16005.1 | HSD11B2  | 0.509978242 | 0           |
| RP11-16005.1 | FGL2     | 0.402807382 | 0           |
| RP11-16005.1 | CLCNKA   | 0.607108899 | 1.47E-45    |
| RP11-16005.1 | GATM     | 0.400458418 | 0           |
| RP11-16005.1 | TNS3     | 0.310482331 | 3.68E-11    |
| RP11-16005.1 | TOB1     | 0.260756503 | 3.33E-08    |
| RP11-16005.1 | MARC2    | 0.487565281 | 0           |
| RP11-16005.1 | LRRC2    | 0.412437273 | 0           |
| RP11-16005.1 | SORD     | 0.21183177  | 7.96E-06    |
| RP11-16005.1 | RIMS4    | 0.397967758 | 0           |
| RP11-16005.1 | SLC29A4  | 0.465066224 | 0           |
| RP11-16005.1 | SLC39A14 | 0.418863771 | 0           |
| RP11-16005.1 | FAXDC2   | 0.427777667 | 0           |
| RP11-16005.1 | HSPB8    | 0.317437315 | 1.28E-11    |
| RP11-16005.1 | CCL19    | 0.261142055 | 2.81E-08    |
| RP11-16005.1 | KCNIP3   | 0.494389349 | 0           |
| RP11-16005.1 | CGNL1    | 0.395739071 | 0           |
| RP11-16005.1 | ATF3     | 0.087306002 | 0.067632389 |
| RP11-16005.1 | SGCD     | 0.341129931 | 2.73E-13    |
| RP11-16005.1 | STARD13  | 0.355302014 | 2.17E-14    |
| RP11-16005.1 | LDHD     | 0.578212682 | 0           |
| RP11-16005.1 | RCAN1    | 0.256315866 | 5.74E-08    |
| RP11-16005.1 | ID3      | 0.323482839 | 4.96E-12    |
| RP11-16005.1 | SYTL3    | 0.48609911  | 0           |
| RP11-16005.1 | MT1E     | 0.493009982 | 0           |
| RP11-16005.1 | CAMK1D   | 0.508422005 | 0           |
| RP11-16005.1 | PRKCQ    | 0.4542988   | 0           |
| RP11-16005.1 | NUAK2    | 0.375278639 | 2.89E-16    |
| RP11-16005.1 | LIPG     | 0.354361634 | 2.59E-14    |
| RP11-16005.1 | SLC25A25 | 0.224073023 | 2.25E-06    |
| RP11-16005.1 | PRKX     | 0.124077846 | 0.009294856 |
| RP11-16005.1 | SRPX     | 0.406801658 | 0           |
| RP11-16005.1 | FAM189A1 | 0.465899233 | 0           |
| RP11-16005.1 | PLEKHH1  | 0.367090098 | 2.07E-15    |
| RP11-16005.1 | WNT11    | 0.470707512 | 0           |
| RP11-16005.1 | SNAI1    | 0.316797204 | 1.41E-11    |
| RP11-16005.1 | FDCSP    | 0.22021529  | 3.19E-06    |
| RP11-16005.1 | MT1X     | 0.447667063 | 0           |
| RP11-16005.1 | ACACB    | 0.505692491 | 0           |
| RP11-16005.1 | ARC      | 0.097968325 | 0.040227812 |
| RP11-16005.1 | KLK4     | 0.312034194 | 2.28E-11    |
| RP11-16005.1 | ZFPM2    | 0.395569575 | 0           |
| RP11-16005.1 | AKAP12   | 0.176395181 | 0.000208055 |
| RP11-16005.1 | GJB6     | 0.239916832 | 3.64E-07    |
| RP11-16005.1 | ERO1LB   | 0.366757632 | 2.23E-15    |
| RP11-16005.1 | DNALI1   | 0.54686157  | 0           |
| RP11-16005.1 | HKDC1    | 0.427225779 | 0           |
| RP11-16005.1 | ZFP36L2  | 0.387123458 | 0           |

|              |          |             |             |
|--------------|----------|-------------|-------------|
| RP11-16005.1 | CAPSL    | 0.653455751 | 8.34E-55    |
| RP11-16005.1 | CYP7B1   | 0.36588278  | 2.68E-15    |
| RP11-16005.1 | CPQ      | 0.397619547 | 0           |
| RP11-16005.1 | RPS6KA6  | 0.419829839 | 3.58E-20    |
| RP11-16005.1 | TLE1     | 0.504273269 | 0           |
| RP11-16005.1 | TP53INP2 | 0.37907803  | 8.53E-17    |
| RP11-16005.1 | KATNAL2  | 0.51441817  | 0           |
| RP11-16005.1 | SGPP2    | 0.30929402  | 4.40E-11    |
| RP11-16005.1 | CTH      | 0.491293753 | 0           |
| RP11-16005.1 | KIF12    | 0.342181654 | 2.28E-13    |
| RP11-16005.1 | TMEM220  | 0.539923039 | 0           |
| RP11-16005.1 | CENPJ    | 0.456963778 | 0           |
| RP11-16005.1 | FAM155B  | 0.431839457 | 0           |
| RP11-16005.1 | WFS1     | 0.444516151 | 0           |
| RP11-16005.1 | SELENBP1 | 0.555338182 | 0           |
| RP11-16005.1 | SNTA1    | 0.515035445 | 0           |
| RP11-16005.1 | FRAS1    | 0.163396375 | 0.000597504 |
| RP11-16005.1 | FBLN7    | 0.5721673   | 0           |
| RP11-16005.1 | AGPAT9   | 0.326887639 | 2.88E-12    |
| RP11-16005.1 | GPR83    | 0.401647296 | 0           |
| RP11-16005.1 | PRTG     | 0.369849539 | 1.12E-15    |
| RP11-16005.1 | EGR3     | 0.178985836 | 0.000167096 |
| RP11-16005.1 | GRAMD2   | 0.326448512 | 3.09E-12    |
| RP11-16005.1 | HYOU1    | 0.379060017 | 8.59E-17    |
| RP11-16005.1 | FBLN5    | 0.388827915 | 0           |
| RP11-16005.1 | ITM2A    | 0.404024203 | 0           |
| RP11-16005.1 | SRF      | 0.411140739 | 0           |
| RP11-16005.1 | FGFR2    | 0.190346707 | 6.17E-05    |
| RP11-16005.1 | MT1A     | 0.340551532 | 2.21E-13    |
| RP11-16005.1 | MAMDC2   | 0.321933836 | 6.33E-12    |
| RP11-16005.1 | FHL2     | 0.467528942 | 0           |
| RP11-16005.1 | FTCDNL1  | 0.447016314 | 0           |
| RP11-16005.1 | PKIA     | 0.258102021 | 4.61E-08    |
| RP11-16005.1 | DNAJB4   | 0.235842669 | 6.26E-07    |
| RP11-16005.1 | SLC25A33 | 0.580985456 | 0           |
| RP11-16005.1 | EYA2     | 0.374046358 | 4.04E-16    |
| RP11-16005.1 | LPAR1    | 0.322809822 | 5.52E-12    |
| RP11-16005.1 | STX11    | 0.332881677 | 1.09E-12    |
| RP11-16005.1 | ARHGEF28 | 0.445414406 | 0           |
| RP11-16005.1 | OR2W3    | 0.416512962 | 0           |
| RP11-16005.1 | ALDH1B1  | 0.440778049 | 2.72E-22    |
| RP11-16005.1 | CXCL12   | 0.335974577 | 6.52E-13    |
| RP11-16005.1 | OLFM2    | 0.494516577 | 0           |
| RP11-16005.1 | TUB      | 0.168325783 | 0.000404037 |
| RP11-16005.1 | HTRA3    | 0.258431083 | 4.43E-08    |
| RP11-16005.1 | CKB      | 0.48231986  | 0           |
| RP11-16005.1 | RGS2     | 0.24171657  | 3.22E-07    |
| RP11-16005.1 | SHANK2   | 0.445061373 | 0           |
| RP11-16005.1 | CNTFR    | 0.554362974 | 9.82E-37    |
| RP11-16005.1 | CYTH3    | 0.413174967 | 0           |
| RP11-16005.1 | PLAC9    | 0.449523002 | 0           |

|              |          |             |             |
|--------------|----------|-------------|-------------|
| RP11-16005.1 | WVOX     | 0.483157266 | 0           |
| RP11-16005.1 | NPR3     | 0.32285521  | 5.48E-12    |
| RP11-16005.1 | SDC2     | 0.250749467 | 1.12E-07    |
| RP11-16005.1 | KLF15    | 0.460825577 | 0           |
| RP11-16005.1 | TMEM164  | 0.505287263 | 0           |
| RP11-16005.1 | LONRF3   | 0.19843426  | 2.93E-05    |
| RP11-16005.1 | GBP1     | 0.375540612 | 2.69E-16    |
| RP11-16005.1 | ARHGAP6  | 0.302050256 | 1.28E-10    |
| RP11-16005.1 | TMEM119  | 0.309936826 | 4.00E-11    |
| RP11-16005.1 | SH3RF1   | 0.26533387  | 1.88E-08    |
| RP11-16005.1 | CRELD2   | 0.54130354  | 0           |
| RP11-16005.1 | PCP4     | 0.165609034 | 0.000501932 |
| RP11-16005.1 | GCSH     | 0.52381956  | 0           |
| RP11-16005.1 | IMPA2    | 0.353399411 | 3.10E-14    |
| RP11-16005.1 | C1R      | 0.356507913 | 1.73E-14    |
| RP11-16005.1 | SUCNR1   | 0.403932151 | 0           |
| RP11-16005.1 | SFRP1    | 0.397078722 | 0           |
| RP11-16005.1 | UGT8     | 0.463122346 | 0           |
| RP11-16005.1 | TLE4     | 0.382905222 | 6.02E-18    |
| RP11-16005.1 | ANTXR1   | 0.397013477 | 0           |
| RP11-16005.1 | GPX3     | 0.397013336 | 0           |
| RP11-16005.1 | DPY19L2  | 0.500908325 | 0           |
| RP11-16005.1 | FAM46C   | 0.496711648 | 0           |
| RP11-16005.1 | IL33     | 0.359809327 | 7.29E-15    |
| RP11-16005.1 | PEG3     | 0.317637731 | 1.24E-11    |
| RP11-16005.1 | FAHD2A   | 0.517441996 | 0           |
| RP11-16005.1 | PTGDS    | 0.174879226 | 0.000236205 |
| RP11-16005.1 | CHCHD10  | 0.524842915 | 0           |
| RP11-16005.1 | CD36     | 0.401833245 | 0           |
| RP11-16005.1 | ANKRD37  | 0.454083633 | 0           |
| RP11-16005.1 | TSPAN33  | 0.538217022 | 0           |
| RP11-16005.1 | PRDM16   | 0.330937941 | 1.50E-12    |
| RP11-16005.1 | UST      | 0.446066998 | 0           |
| RP11-16005.1 | NEXN     | 0.450135313 | 0           |
| RP11-16005.1 | NUPR1L   | 0.305839898 | 5.86E-11    |
| RP11-16005.1 | SLC24A3  | 0.57041164  | 0           |
| RP11-16005.1 | MARC1    | 0.50234783  | 0           |
| RP11-16005.1 | MYH11    | 0.273754741 | 6.36E-09    |
| RP11-16005.1 | APOA1    | 0.5053104   | 7.91E-30    |
| RP11-16005.1 | TMEM178B | 0.318309897 | 1.12E-11    |
| RP11-16005.1 | CAPN6    | 0.382336584 | 9.93E-17    |
| RP11-16005.1 | PPM1L    | 0.474843057 | 0           |
| RP11-16005.1 | FZD8     | 0.562731726 | 0           |
| RP11-16005.1 | RCAN2    | 0.496441732 | 0           |
| RP11-16005.1 | COPZ2    | 0.563055115 | 0           |
| RP11-16005.1 | GAS1     | 0.368834836 | 1.41E-15    |
| RP11-16005.1 | DACT1    | 0.423279303 | 0           |
| RP11-16005.1 | WBSCR17  | 0.433341229 | 0           |
| RP11-16005.1 | NCS1     | 0.270353628 | 9.89E-09    |
| RP11-16005.1 | SPIRE2   | 0.401510565 | 0           |
| RP11-16005.1 | C15orf52 | 0.500433171 | 0           |

|              |          |             |             |
|--------------|----------|-------------|-------------|
| RP11-16005.1 | SPAG5    | 0.566448285 | 0           |
| RP11-16005.1 | ARL4D    | 0.499522434 | 0           |
| RP11-16005.1 | FAM189A2 | 0.347367645 | 9.21E-14    |
| RP11-16005.1 | MAP1LC3A | 0.577329888 | 0           |
| RP11-16005.1 | KLF6     | 0.028111552 | 0.556765934 |
| RP11-16005.1 | ADD3     | 0.247172193 | 1.71E-07    |
| RP11-16005.1 | TSPAN7   | 0.299828377 | 1.77E-10    |
| RP11-16005.1 | KLF9     | 0.291845074 | 5.51E-10    |
| RP11-16005.1 | KCNQ1    | 0.504991107 | 0           |
| RP11-16005.1 | MAN1A1   | 0.326092075 | 3.28E-12    |
| RP11-16005.1 | MLF1     | 0.283729295 | 1.69E-09    |
| RP11-16005.1 | RARB     | 0.45417143  | 0           |
| RP11-16005.1 | CDC42EP2 | 0.578051555 | 0           |
| RP11-16005.1 | FAM3B    | 0.274287623 | 5.93E-09    |
| RP11-16005.1 | GADD45B  | 0.293061328 | 4.64E-10    |
| RP11-16005.1 | TMEM47   | 0.403436288 | 0           |
| RP11-16005.1 | SDF2L1   | 0.480243931 | 0           |
| RP11-16005.1 | CCDC85A  | 0.156579825 | 0.001008508 |
| RP11-16005.1 | CRYBG3   | 0.033823901 | 0.479496693 |
| RP11-16005.1 | FBLN2    | 0.18995864  | 6.38E-05    |
| RP11-16005.1 | PEBP4    | 0.425143043 | 0           |
| RP11-16005.1 | CDADC1   | 0.555139894 | 0           |
| RP11-16005.1 | FAM63A   | 0.439747728 | 0           |
| RP11-16005.1 | GLUL     | 0.334538902 | 8.28E-13    |
| RP11-16005.1 | FREM2    | 0.370385542 | 9.93E-16    |
| RP11-16005.1 | ACKR3    | 0.351345893 | 4.51E-14    |
| RP11-16005.1 | DENND6A  | 0.408138047 | 0           |
| RP11-16005.1 | CLDN8    | 0.136394982 | 0.004223267 |
| RP11-16005.1 | UTS2R    | 0.086309818 | 0.070823408 |
| RP11-16005.1 | SCNN1B   | 0.381393663 | 2.80E-17    |
| RP11-16005.1 | TTC30A   | 0.417137613 | 0           |
| RP11-16005.1 | CORO2B   | 0.506849173 | 0           |
| RP11-16005.1 | TC2N     | 0.35784799  | 1.34E-14    |
| RP11-16005.1 | ALDH2    | 0.66665948  | 0           |
| RP11-16005.1 | GPR183   | 0.170828215 | 0.000329896 |
| RP11-16005.1 | C4orf47  | 0.527817098 | 0           |
| RP11-16005.1 | SLC25A42 | 0.476192212 | 0           |
| RP11-16005.1 | LGMN     | 0.524001396 | 0           |
| RP11-16005.1 | ACSF2    | 0.615752574 | 0           |
| RP11-16005.1 | KIAA1467 | 0.338318719 | 4.40E-13    |
| RP11-16005.1 | PRKG1    | 0.516950105 | 0           |
| RP11-16005.1 | GNAI1    | 0.462038994 | 0           |
| RP11-16005.1 | ABCC4    | 0.39484961  | 0           |
| RP11-16005.1 | PRPS1    | 0.483052165 | 0           |
| RP11-16005.1 | TSPAN5   | 0.333256552 | 1.02E-12    |
| RP11-16005.1 | CR2      | 0.339593316 | 2.60E-13    |
| RP11-16005.1 | CCDC170  | 0.364298176 | 3.74E-15    |
| RP11-16005.1 | RRAD     | 0.218096716 | 4.21E-06    |
| RP11-16005.1 | SCGB2A1  | 0.53981269  | 0           |
| RP11-16005.1 | SESN3    | 0.375568838 | 2.67E-16    |
| RP11-16005.1 | SGK223   | 0.16443746  | 0.000550607 |

|              |          |              |             |
|--------------|----------|--------------|-------------|
| RP11-16005.1 | NDRG2    | 0.561204282  | 0           |
| RP11-16005.1 | C3orf52  | 0.216440909  | 4.99E-06    |
| RP11-16005.1 | FLRT3    | -0.248089738 | 1.54E-07    |
| RP11-16005.1 | MST1R    | -0.442042653 | 0           |
| RP11-16005.1 | SDC1     | -0.29242377  | 5.08E-10    |
| RP11-16005.1 | ST8SIA4  | -0.329601977 | 1.86E-12    |
| RP11-16005.1 | UBTD1    | -0.272696636 | 7.30E-09    |
| RP11-16005.1 | EPHA2    | -0.428479052 | 0           |
| RP11-16005.1 | TMEM130  | -0.280956521 | 2.45E-09    |
| RP11-16005.1 | SPINK2   | -0.220595886 | 3.25E-06    |
| RP11-16005.1 | MMP16    | -0.4724653   | 0           |
| RP11-16005.1 | SIGLEC15 | -0.496195361 | 0           |
| RP11-16005.1 | RIN1     | -0.3962277   | 0           |
| RP11-16005.1 | IL1RN    | -0.340263732 | 3.16E-13    |
| RP11-16005.1 | FCER1G   | -0.032255891 | 0.500108759 |
| RP11-16005.1 | CD276    | -0.479387944 | 0           |
| RP11-16005.1 | CTSB     | -0.422018654 | 0           |
| RP11-16005.1 | FAM171A2 | -0.161278179 | 0.00070458  |
| RP11-16005.1 | ASPHD1   | -0.423717296 | 0           |
| RP11-16005.1 | C15orf48 | -0.158779151 | 0.000853677 |
| RP11-16005.1 | DYSF     | -0.275859888 | 4.83E-09    |
| RP11-16005.1 | PDZRN4   | -0.156604788 | 0.001006614 |
| RP11-16005.1 | EFHD2    | -0.102798588 | 0.031323009 |
| RP11-16005.1 | ASF1B    | -0.133860637 | 0.004993479 |
| RP11-16005.1 | AQP1     | -0.159693008 | 0.000796061 |
| RP11-16005.1 | ARRDC2   | -0.447703231 | 0           |
| RP11-16005.1 | PRSS1    | -0.246849844 | 1.62E-07    |
| RP11-16005.1 | MAPK13   | -0.367967502 | 1.71E-15    |
| RP11-16005.1 | CST5     | -0.495684147 | 1.34E-28    |
| RP11-16005.1 | AHR      | -0.473538865 | 0           |
| RP11-16005.1 | BAX      | -0.219370555 | 3.69E-06    |
| RP11-16005.1 | C1orf115 | -0.430254427 | 0           |
| RP11-16005.1 | PLK3     | -0.326762965 | 2.94E-12    |
| RP11-16005.1 | JAG2     | -0.336534266 | 5.94E-13    |
| RP11-16005.1 | RAD23B   | -0.55609233  | 0           |
| RP11-16005.1 | CA12     | 0.128623584  | 0.006998778 |
| RP11-16005.1 | ADTRP    | -0.466816494 | 0           |
| RP11-16005.1 | UCP2     | -0.489666172 | 0           |
| RP11-16005.1 | IGFBP2   | -0.36181631  | 6.18E-15    |
| RP11-16005.1 | LOXL2    | -0.263242056 | 2.44E-08    |
| RP11-16005.1 | GPX1     | -0.140143738 | 0.003279929 |
| RP11-16005.1 | P3H3     | -0.287701444 | 9.79E-10    |
| RP11-16005.1 | C2orf81  | -0.339926585 | 3.35E-13    |
| RP11-16005.1 | CDT1     | -0.290570951 | 6.58E-10    |
| RP11-16005.1 | SNX25    | -0.392432705 | 0           |
| RP11-16005.1 | MTHFD1L  | -0.529453189 | 0           |
| RP11-16005.1 | CDC42BPG | -0.624119497 | 8.98E-49    |
| RP11-16005.1 | MSN      | -0.606672019 | 0           |
| RP11-16005.1 | SIGLEC6  | -0.481679499 | 7.00E-27    |
| RP11-16005.1 | F2R      | -0.34313409  | 1.93E-13    |
| RP11-16005.1 | TMEM184A | -0.432370779 | 0           |



|              |          |              |             |
|--------------|----------|--------------|-------------|
| RP11-16005.1 | CKS2     | -0.081997889 | 0.086153477 |
| RP11-16005.1 | TAX1BP3  | -0.357196674 | 1.52E-14    |
| RP11-16005.1 | PMEPA1   | -0.343463294 | 1.83E-13    |
| RP11-16005.1 | CXCL16   | -0.354640485 | 2.46E-14    |
| RP11-16005.1 | FAXC     | -0.513369284 | 0           |
| RP11-16005.1 | VTCN1    | -0.448439438 | 4.18E-23    |
| RP11-16005.1 | SH2D4A   | -0.457369999 | 0           |
| RP11-16005.1 | RNF24    | -0.480472431 | 0           |
| RP11-16005.1 | LY6G6C   | -0.504897461 | 8.94E-30    |
| RP11-16005.1 | NID1     | -0.390473651 | 0           |
| RP11-16005.1 | STAC     | -0.445012439 | 0           |
| RP11-16005.1 | RAB34    | -0.385753311 | 0           |
| RP11-16005.1 | HES4     | -0.213680049 | 6.61E-06    |
| RP11-16005.1 | EPHA10   | -0.563194115 | 0           |
| RP11-16005.1 | ENTPD2   | -0.424619522 | 0           |
| RP11-16005.1 | DDB2     | -0.351827288 | 4.13E-14    |
| RP11-16005.1 | NKAIN4   | -0.209215584 | 1.03E-05    |
| RP11-16005.1 | TRIM29   | -0.567052936 | 0           |
| RP11-16005.1 | ADCY8    | -0.34155755  | 1.86E-13    |
| RP11-16005.1 | SFTA2    | -0.298915513 | 2.02E-10    |
| RP11-16005.1 | NRIP1    | -0.501147888 | 0           |
| RP11-16005.1 | VWA1     | -0.099277056 | 0.037625727 |
| RP11-16005.1 | APLNR    | -0.207458789 | 1.23E-05    |
| RP11-16005.1 | REN      | -0.380592695 | 1.40E-16    |
| RP11-16005.1 | EDIL3    | -0.22626001  | 1.78E-06    |
| RP11-16005.1 | AGRN     | -0.514151232 | 0           |
| RP11-16005.1 | TREM1    | -0.209322387 | 1.02E-05    |
| RP11-16005.1 | SRL      | -0.395418944 | 0           |
| RP11-16005.1 | RASGRF1  | -0.509092753 | 0           |
| RP11-16005.1 | RMI2     | -0.294079009 | 4.02E-10    |
| RP11-16005.1 | SAMD1    | -0.311141874 | 3.33E-11    |
| RP11-16005.1 | MGAT4B   | -0.524829866 | 0           |
| RP11-16005.1 | NXN      | -0.472798475 | 0           |
| RP11-16005.1 | SH3BGRL3 | -0.179217598 | 0.000163827 |
| RP11-16005.1 | CA11     | -0.154129163 | 0.001211323 |
| RP11-16005.1 | PLD3     | -0.166229856 | 0.000477791 |
| RP11-16005.1 | LURAP1L  | -0.305585404 | 7.64E-11    |
| RP11-16005.1 | CARNS1   | -0.466319213 | 0           |
| RP11-16005.1 | PDLIM7   | -0.234211116 | 7.50E-07    |
| RP11-16005.1 | BCL2L1   | -0.42067957  | 0           |
| RP11-16005.1 | GGT6     | -0.394168792 | 0           |
| RP11-16005.1 | DPYSL3   | -0.230347473 | 1.15E-06    |
| RP11-16005.1 | FYN      | -0.462018853 | 0           |
| RP11-16005.1 | TK1      | -0.073637867 | 0.123388307 |
| RP11-16005.1 | AK1      | -0.039535682 | 0.408471141 |
| RP11-16005.1 | HIGD1B   | -0.148302919 | 0.001853189 |
| RP11-16005.1 | TMEM59L  | -0.356145803 | 1.86E-14    |
| RP11-16005.1 | MEGF9    | -0.54674271  | 0           |
| RP11-16005.1 | ZFP36L1  | -0.420844243 | 0           |
| RP11-16005.1 | ADRA1B   | -0.326549783 | 3.04E-12    |
| RP11-16005.1 | EPHA4    | -0.442175129 | 0           |

|              |          |              |             |
|--------------|----------|--------------|-------------|
| RP11-16005.1 | TCERG1L  | -0.417631206 | 0           |
| RP11-16005.1 | NGFR     | -0.281962288 | 2.14E-09    |
| RP11-16005.1 | EBI3     | -0.255784402 | 6.12E-08    |
| RP11-16005.1 | S100A10  | -0.225682591 | 1.90E-06    |
| RP11-16005.1 | S100B    | -0.166658487 | 0.000461759 |
| RP11-16005.1 | CD44     | -0.18900436  | 6.96E-05    |
| RP11-16005.1 | BHLHE41  | -0.574941634 | 0           |
| RP11-16005.1 | FBXO2    | -0.21564109  | 5.42E-06    |
| RP11-16005.1 | SLC30A2  | -0.388834014 | 0           |
| RP11-16005.1 | FRMD5    | -0.324791287 | 4.03E-12    |
| RP11-16005.1 | SAMD11   | -0.500298142 | 0           |
| RP11-16005.1 | SIPA1L2  | -0.507531268 | 0           |
| RP11-16005.1 | S100A16  | -0.430806032 | 0           |
| RP11-16005.1 | PPL      | -0.587601733 | 0           |
| RP11-16005.1 | ARHGDIB  | -0.068559672 | 0.151498375 |
| RP11-16005.1 | CDC42EP3 | -0.356724357 | 1.66E-14    |
| RP11-16005.1 | RUNX2    | -0.383491434 | 0           |
| RP11-16005.1 | LAMC2    | -0.509550178 | 0           |
| RP11-16005.1 | BRINP1   | -0.444683661 | 0           |
| RP11-16005.1 | GPRC5B   | -0.578891656 | 0           |
| RP11-16005.1 | AQP5     | -0.131523444 | 0.005813732 |
| RP11-16005.1 | PLAG1    | -0.377260104 | 1.61E-16    |
| RP11-16005.1 | PTPRU    | -0.570708505 | 0           |
| RP11-16005.1 | ANGPTL4  | -0.282104125 | 2.10E-09    |
| RP11-16005.1 | PALM3    | -0.44002814  | 0           |
| RP11-16005.1 | ACP5     | -0.170624963 | 0.000335408 |
| RP11-16005.1 | DLG4     | -0.316303327 | 1.52E-11    |
| RP11-16005.1 | ETNK2    | -0.487003889 | 0           |
| RP11-16005.1 | CD109    | -0.568924336 | 0           |
| RP11-16005.1 | SNX22    | -0.301759773 | 1.34E-10    |
| RP11-16005.1 | TMEM98   | -0.627567749 | 0           |
| RP11-16005.1 | CTHRC1   | -0.234665704 | 7.13E-07    |
| RP11-16005.1 | S100A2   | -0.284743289 | 1.47E-09    |
| RP11-16005.1 | C11orf80 | -0.438798129 | 0           |
| RP11-16005.1 | SREBF1   | -0.396143307 | 0           |
| RP11-16005.1 | PRSS22   | -0.43262637  | 0           |
| RP11-16005.1 | CMTM3    | -0.186259244 | 8.88E-05    |
| RP11-16005.1 | RDH5     | -0.472778618 | 0           |
| RP11-16005.1 | MYH10    | -0.409420539 | 0           |
| RP11-16005.1 | EVPL     | -0.488413183 | 0           |
| RP11-16005.1 | SCD      | -0.44156296  | 0           |
| RP11-16005.1 | CD151    | -0.403261829 | 0           |
| RP11-16005.1 | S100A4   | -0.313074263 | 2.49E-11    |
| RP11-16005.1 | BNIPL    | -0.382470774 | 1.14E-17    |
| RP11-16005.1 | MAP3K6   | -0.434253384 | 0           |
| RP11-16005.1 | MANEAL   | -0.385373897 | 0           |
| RP11-16005.1 | CD207    | -0.282075533 | 1.79E-09    |
| RP11-16005.1 | CD1A     | -0.282080007 | 1.79E-09    |
| RP11-16005.1 | C3       | -0.240125866 | 3.86E-07    |
| RP11-16005.1 | NT5E     | -0.392242644 | 0           |
| RP11-16005.1 | CACNG4   | -0.45718863  | 4.64E-24    |

|              |          |              |             |
|--------------|----------|--------------|-------------|
| RP11-16005.1 | FHOD1    | -0.394180139 | 0           |
| RP11-16005.1 | LEMD1    | -0.45257789  | 0           |
| RP11-16005.1 | ATP11A   | -0.309620529 | 4.19E-11    |
| RP11-16005.1 | PPAP2C   | -0.226746512 | 1.69E-06    |
| RP11-16005.1 | DRAM1    | -0.489753544 | 0           |
| RP11-16005.1 | CDA      | -0.257103204 | 5.21E-08    |
| RP11-16005.1 | CCND2    | -0.282803241 | 1.91E-09    |
| RP11-16005.1 | LCN6     | -0.34234953  | 1.62E-13    |
| RP11-16005.1 | CDH4     | -0.399312232 | 0           |
| RP11-16005.1 | MMP11    | -0.310018949 | 3.95E-11    |
| RP11-16005.1 | B3GAT1   | -0.597554444 | 0           |
| RP11-16005.1 | SPP1     | -0.182633178 | 0.000122096 |
| RP11-16005.1 | HLA-DQB1 | -0.059741658 | 0.211475685 |
| RP11-16005.1 | SDC3     | -0.449870077 | 0           |
| RP11-16005.1 | CX3CL1   | -0.339584474 | 3.55E-13    |
| RP11-16005.1 | SDK1     | -0.394871169 | 0           |
| RP11-16005.1 | DOCK9    | -0.635566086 | 0           |
| RP11-16005.1 | CSF2     | -0.35506158  | 1.73E-14    |
| RP11-16005.1 | GRHL3    | -0.499228832 | 0           |
| RP11-16005.1 | TMEM92   | -0.409132675 | 3.81E-19    |
| RP11-16005.1 | BASP1    | -0.448987141 | 0           |
| RP11-16005.1 | HRH1     | -0.506900518 | 0           |
| RP11-16005.1 | ESM1     | -0.200766062 | 2.35E-05    |
| RP11-16005.1 | B4GALNT3 | -0.547255735 | 0           |
| RP11-16005.1 | LMO3     | -0.219155672 | 3.77E-06    |
| RP11-16005.1 | C9orf16  | -0.266234962 | 1.67E-08    |
| RP11-16005.1 | SEMA3F   | -0.331441604 | 1.38E-12    |
| RP11-16005.1 | PLA2G12B | -0.284215989 | 1.33E-09    |
| RP11-16005.1 | KLK6     | -0.513422047 | 6.80E-31    |
| RP11-16005.1 | ST3GAL5  | -0.337627263 | 4.94E-13    |
| RP11-16005.1 | FAM132B  | -0.281671664 | 2.23E-09    |
| RP11-16005.1 | CDKN1A   | -0.236102089 | 6.08E-07    |
| RP11-16005.1 | E2F1     | -0.304406029 | 9.09E-11    |
| RP11-16005.1 | B3GNT8   | -0.23910237  | 4.34E-07    |
| RP11-16005.1 | MTMR11   | -0.402175782 | 0           |
| RP11-16005.1 | MYO1G    | -0.29976838  | 1.79E-10    |
| RP11-16005.1 | TMSB10   | -0.215104662 | 5.72E-06    |
| RP11-16005.1 | UNC5CL   | -0.361122868 | 7.10E-15    |
| RP11-16005.1 | ABR      | -0.374446481 | 3.63E-16    |
| RP11-16005.1 | PLP2     | -0.223927499 | 2.29E-06    |
| RP11-16005.1 | SRCIN1   | -0.397562387 | 0           |
| RP11-16005.1 | PDE9A    | -0.533185066 | 0           |
| RP11-16005.1 | TREM2    | -0.107168732 | 0.024776791 |
| RP11-16005.1 | KDEL3    | -0.245737511 | 2.02E-07    |
| RP11-16005.1 | PC       | -0.611670785 | 0           |
| RP11-16005.1 | C2CD4A   | -0.418420388 | 0           |
| RP11-16005.1 | PELI1    | -0.424387335 | 0           |
| RP11-16005.1 | SSX1     | -0.339529725 | 3.58E-13    |
| RP11-16005.1 | MROH6    | -0.44050443  | 0           |
| RP11-16005.1 | ESPN     | -0.452212943 | 0           |
| RP11-16005.1 | BMP1     | -0.336232721 | 6.24E-13    |

|              |          |              |             |
|--------------|----------|--------------|-------------|
| RP11-16005.1 | TM4SF4   | -0.450725107 | 2.37E-23    |
| RP11-16005.1 | CORO2A   | -0.546259471 | 0           |
| RP11-16005.1 | CD164L2  | -0.343703507 | 1.28E-13    |
| RP11-16005.1 | CTSS     | -0.221022107 | 3.11E-06    |
| RP11-16005.1 | CLU      | -0.385391059 | 0           |
| RP11-16005.1 | TMSB4X   | -0.237827963 | 5.01E-07    |
| RP11-16005.1 | WNT10A   | -0.508830798 | 2.75E-30    |
| RP11-16005.1 | NAPSA    | -0.259223952 | 4.02E-08    |
| RP11-16005.1 | PLEKHA4  | -0.552502433 | 0           |
| RP11-16005.1 | SFTPA1   | -0.02286552  | 0.632805094 |
| RP11-16005.1 | C1orf116 | -0.52585776  | 0           |
| RP11-16005.1 | TM4SF1   | -0.41518409  | 0           |
| RP11-16005.1 | SEL1L3   | -0.528260056 | 0           |
| RP11-16005.1 | VASN     | -0.384942145 | 0           |
| RP11-16005.1 | NPTXR    | -0.487801581 | 0           |
| RP11-16005.1 | PDE4C    | -0.472799752 | 0           |
| RP11-16005.1 | CDC42EP1 | -0.479295467 | 0           |
| RP11-16005.1 | ENDOD1   | -0.620212784 | 0           |
| RP11-16005.1 | RYR1     | -0.452554203 | 0           |
| RP11-16005.1 | IL1RAP   | -0.51832635  | 0           |
| RP11-16005.1 | SLC35F2  | -0.618880175 | 9.20E-48    |
| RP11-16005.1 | ISYNA1   | -0.286523487 | 1.15E-09    |
| RP11-16005.1 | HLA-G    | -0.363437366 | 4.46E-15    |
| RP11-16005.1 | CDKN2B   | -0.430390449 | 0           |
| RP11-16005.1 | ALDH1A3  | -0.440634778 | 0           |
| RP11-16005.1 | CLIP3    | -0.32100381  | 7.33E-12    |
| RP11-16005.1 | ULBP2    | -0.387743002 | 0           |
| RP11-16005.1 | ETHE1    | -0.444914288 | 0           |
| RP11-16005.1 | XPR1     | -0.411910489 | 0           |
| RP11-16005.1 | SPTBN2   | -0.581956331 | 0           |
| RP11-16005.1 | IVL      | -0.357358445 | 1.14E-14    |
| RP11-16005.1 | MARCO    | -0.337554643 | 5.00E-13    |
| RP11-16005.1 | PLXND1   | -0.359959945 | 8.92E-15    |
| RP11-16005.1 | EMILIN2  | -0.258917726 | 4.17E-08    |
| RP11-16005.1 | PLAUR    | -0.278445579 | 3.43E-09    |
| RP11-16005.1 | CDC42EP5 | -0.38951157  | 0           |
| RP11-16005.1 | TRPC5    | -0.430430628 | 3.16E-21    |
| RP11-16005.1 | TMEM100  | -0.165370606 | 0.000511501 |
| RP11-16005.1 | QSOX1    | -0.576681976 | 0           |
| RP11-16005.1 | ARHGAP23 | -0.546517189 | 0           |
| RP11-16005.1 | MDF1     | -0.330966734 | 1.49E-12    |
| RP11-16005.1 | FSTL3    | -0.539576106 | 0           |
| RP11-16005.1 | INF2     | -0.509454296 | 0           |
| RP11-16005.1 | TGFBR1   | -0.599040472 | 0           |
| RP11-16005.1 | TGFBI    | -0.150883078 | 0.001537903 |
| RP11-16005.1 | ERBB3    | -0.614538731 | 0           |
| RP11-16005.1 | CCL18    | -0.306790169 | 6.39E-11    |
| RP11-16005.1 | CCL17    | -0.233290105 | 7.72E-07    |
| RP11-16005.1 | C16orf45 | -0.478132544 | 0           |
| RP11-16005.1 | PRDM1    | -0.365391173 | 2.98E-15    |
| RP11-16005.1 | TRIM47   | -0.350043828 | 5.71E-14    |

|              |           |              |             |
|--------------|-----------|--------------|-------------|
| RP11-16005.1 | CNFN      | -0.319905139 | 8.70E-12    |
| RP11-16005.1 | ARMCX3    | -0.524409603 | 0           |
| RP11-16005.1 | RAMP1     | -0.356318986 | 1.80E-14    |
| RP11-16005.1 | GABRD     | -0.24331011  | 2.68E-07    |
| RP11-16005.1 | COL13A1   | -0.233527603 | 8.09E-07    |
| RP11-16005.1 | S100A5    | -0.39281368  | 0           |
| RP11-16005.1 | MISP      | -0.337693927 | 4.89E-13    |
| RP11-16005.1 | HES6      | -0.300658833 | 1.57E-10    |
| RP11-16005.1 | PSD3      | -0.537505142 | 0           |
| RP11-16005.1 | DOK7      | -0.602864401 | 0           |
| RP11-16005.1 | ZMAT3     | -0.526854733 | 0           |
| RP11-16005.1 | MFAP2     | -0.253348207 | 8.22E-08    |
| RP11-16005.1 | TMEM79    | -0.424031607 | 0           |
| RP11-16005.1 | SLC1A5    | -0.213233263 | 6.91E-06    |
| RP11-16005.1 | BBC3      | -0.301906433 | 1.31E-10    |
| RP11-16005.1 | HLA-DQB2  | -0.110713668 | 0.020369853 |
| RP11-16005.1 | C1QL1     | -0.476500424 | 0           |
| RP11-16005.1 | TMEM215   | -0.287827139 | 8.05E-10    |
| RP11-16005.1 | PNP       | -0.420068394 | 0           |
| RP11-16005.1 | ARNTL     | -0.484310686 | 0           |
| RP11-16005.1 | CLDN2     | -0.239624126 | 3.76E-07    |
| RP11-16005.1 | MVP       | -0.344284673 | 1.58E-13    |
| RP11-16005.1 | LGALS1    | -0.157310711 | 0.000954389 |
| RP11-16005.1 | BIRC7     | -0.376661676 | 3.02E-16    |
| RP11-16005.1 | COL8A1    | -0.450510897 | 0           |
| RP11-16005.1 | PERP      | -0.58098886  | 0           |
| RP11-16005.1 | GJA4      | -0.391226381 | 0           |
| RP11-16005.1 | IGFL2     | -0.346712603 | 7.61E-14    |
| RP11-16005.1 | DAPK2     | -0.594900671 | 0           |
| RP11-16005.1 | MAMLD1    | -0.527619945 | 0           |
| RP11-16005.1 | ETV5      | -0.36578392  | 2.74E-15    |
| RP11-16005.1 | RUNX1     | -0.507202915 | 0           |
| RP11-16005.1 | LONRF2    | -0.537941574 | 0           |
| RP11-16005.1 | SPOCK1    | -0.294597424 | 3.74E-10    |
| RP11-16005.1 | XKRX      | -0.466075395 | 0           |
| RP11-16005.1 | TGFB1     | -0.242364624 | 2.99E-07    |
| RP11-16005.1 | ERP27     | -0.294338145 | 3.88E-10    |
| RP11-16005.1 | TNFRSF10C | -0.366663735 | 2.27E-15    |
| RP11-16005.1 | PALM      | -0.594889608 | 0           |
| RP11-16005.1 | TSC22D1   | -0.392120096 | 0           |
| RP11-16005.1 | TGM2      | -0.379227952 | 8.05E-17    |
| RP11-16005.1 | UBE2QL1   | -0.366514097 | 2.35E-15    |
| RP11-16005.1 | ECE1      | -0.545514684 | 0           |
| RP11-16005.1 | COL8A2    | -0.471086359 | 0           |
| RP11-16005.1 | HIST3H2A  | -0.348736515 | 7.22E-14    |
| RP11-16005.1 | TNFRSF21  | -0.508371227 | 0           |
| RP11-16005.1 | SOX4      | -0.538951455 | 0           |
| RP11-16005.1 | ELF3      | -0.522892087 | 0           |
| RP11-16005.1 | TPD52L1   | -0.531491673 | 0           |
| RP11-16005.1 | INHBB     | -0.480741496 | 0           |
| RP11-16005.1 | HPN       | -0.297637561 | 2.42E-10    |

|              |            |              |             |
|--------------|------------|--------------|-------------|
| RP11-16005.1 | MMP7       | -0.324362873 | 3.26E-12    |
| RP11-16005.1 | RAB27A     | -0.537909377 | 0           |
| RP11-16005.1 | IGF2BP2    | -0.4483432   | 0           |
| RP11-16005.1 | ITGB4      | -0.436380657 | 0           |
| RP11-16005.1 | PPP1R1B    | -0.434533086 | 0           |
| RP11-16005.1 | NPDC1      | -0.212574855 | 7.39E-06    |
| RP11-16005.1 | CCL13      | -0.30754939  | 4.52E-11    |
| RP11-16005.1 | SPINT1     | -0.510840612 | 0           |
| RP11-16005.1 | HEY2       | -0.307849125 | 5.46E-11    |
| RP11-16005.1 | CST2       | -0.422759858 | 1.85E-20    |
| RP11-16005.1 | ADM        | -0.249185997 | 1.35E-07    |
| RP11-16005.1 | VSTM2L     | -0.270408945 | 9.82E-09    |
| RP11-16005.1 | FAM84A     | -0.415941784 | 0           |
| RP11-16005.1 | P4HA2      | -0.279919834 | 2.82E-09    |
| RP11-16005.1 | LPL        | -0.415614424 | 0           |
| RP11-16005.1 | TMEM173    | -0.275946834 | 4.77E-09    |
| RP11-16005.1 | DHRS3      | -0.511917156 | 0           |
| RP11-16005.1 | SCN1B      | -0.318539957 | 1.08E-11    |
| RP11-16005.1 | GLT1D1     | -0.357564458 | 1.42E-14    |
| RP11-16005.1 | PHYHIP     | -0.379316884 | 7.77E-17    |
| RP11-16005.1 | BHLHE40    | -0.488726785 | 0           |
| RP11-16005.1 | BID        | -0.498582905 | 0           |
| RP11-16005.1 | POSTN      | -0.221128343 | 3.07E-06    |
| RP11-16005.1 | ITGA3      | -0.518687326 | 0           |
| RP11-16005.1 | RSP04      | -0.519976342 | 0           |
| RP11-16005.1 | ADAMTS9    | -0.271270464 | 8.78E-09    |
| RP11-16005.1 | ABTB2      | -0.591308504 | 0           |
| RP11-16005.1 | KCNQ3      | -0.640308552 | 0           |
| RP11-16005.1 | ANXA1      | -0.458619868 | 0           |
| RP11-16005.1 | S100A11    | -0.310427157 | 3.71E-11    |
| RP11-16005.1 | CEACAM6    | -0.429106522 | 4.30E-21    |
| RP11-16005.1 | IER5L      | -0.360165893 | 8.57E-15    |
| RP11-16005.1 | KRT80      | -0.542544757 | 0           |
| RP11-16005.1 | CDH6       | -0.412074028 | 0           |
| RP11-16005.1 | UNC5B      | -0.372284457 | 6.31E-16    |
| RP11-16005.1 | PLEKHN1    | -0.515804486 | 0           |
| RP11-16005.1 | SYTL1      | -0.262506631 | 2.67E-08    |
| RP11-16005.1 | TMEM163    | -0.450317715 | 0           |
| RP11-16005.1 | C4orf48    | -0.058277899 | 0.222896259 |
| RP11-16005.1 | B3GNT7     | -0.280578667 | 2.58E-09    |
| RP11-16005.1 | BAIAP3     | -0.529861539 | 0           |
| RP11-16005.1 | PHLDA2     | -0.245320226 | 2.12E-07    |
| RP11-16005.1 | GAP43      | -0.424089861 | 1.36E-20    |
| RP11-16005.1 | S100A1     | -0.416619624 | 0           |
| RP11-16005.1 | PTPRE      | -0.601948984 | 0           |
| RP11-16005.1 | CCND1      | -0.518988588 | 0           |
| RP11-16005.1 | ST6GALNAC5 | -0.524594931 | 2.07E-32    |
| RP11-16005.1 | KRT17      | -0.273824383 | 6.30E-09    |
| RP11-16005.1 | HPCAL4     | -0.418912563 | 0           |
| RP11-16005.1 | GABBR2     | -0.226080019 | 1.82E-06    |
| RP11-16005.1 | DIRAS3     | -0.358927229 | 1.09E-14    |

|              |         |              |             |
|--------------|---------|--------------|-------------|
| RP11-16005.1 | SERINC2 | -0.347976551 | 8.27E-14    |
| RP11-16005.1 | PTCHD4  | -0.386862052 | 0           |
| RP11-16005.1 | EPS8    | -0.558601713 | 0           |
| RP11-16005.1 | LY6E    | -0.407125046 | 0           |
| RP11-16005.1 | UPP1    | -0.471391734 | 0           |
| RP11-16005.1 | AHNAK2  | -0.494436439 | 0           |
| RP11-16005.1 | PLXNC1  | -0.367125841 | 2.06E-15    |
| RP11-16005.1 | TNC     | -0.251987564 | 9.67E-08    |
| RP11-16005.1 | DUSP4   | -0.350665074 | 5.10E-14    |
| RP11-16005.1 | NRCAM   | -0.544549057 | 0           |
| RP11-16005.1 | NRP2    | -0.425191835 | 0           |
| RP11-16005.1 | CTSC    | -0.345845165 | 1.20E-13    |
| RP11-16005.1 | AMIG02  | -0.379158736 | 8.27E-17    |
| RP11-16005.1 | NAB2    | -0.400546782 | 0           |
| RP11-16005.1 | TBC1D2  | -0.591570903 | 0           |
| RP11-16005.1 | PHLDA3  | -0.301610844 | 1.37E-10    |
| RP11-16005.1 | PTP4A3  | -0.245495111 | 2.08E-07    |
| RP11-16005.1 | CRABP2  | -0.087486135 | 0.06706625  |
| RP11-16005.1 | GOS2    | -0.145539364 | 0.002255728 |
| RP11-16005.1 | S100A6  | -0.401613256 | 0           |
| RP11-16005.1 | FOXQ1   | -0.493683567 | 0           |
| RP11-16005.1 | LRG1    | -0.45155879  | 0           |
| RP11-16005.1 | LAMP5   | -0.305647529 | 7.57E-11    |
| RP11-16005.1 | ALDH3B1 | -0.511171518 | 0           |
| RP11-16005.1 | CDH2    | -0.260484033 | 3.44E-08    |
| RP11-16005.1 | SCG5    | -0.18205122  | 0.000128415 |
| RP11-16005.1 | ZCCHC16 | -0.392436353 | 1.29E-17    |
| RP11-16005.1 | GRB7    | -0.580822485 | 0           |
| RP11-16005.1 | TIAM1   | -0.424223796 | 0           |
| RP11-16005.1 | FXYD5   | -0.094799683 | 0.047164458 |
| RP11-16005.1 | CLDN9   | -0.358943398 | 1.09E-14    |
| RP11-16005.1 | FAM43A  | -0.544704794 | 0           |
| RP11-16005.1 | CHST2   | -0.490899304 | 0           |
| RP11-16005.1 | HMGA2   | -0.278411821 | 3.44E-09    |
| RP11-16005.1 | GALNT7  | -0.427168619 | 0           |
| RP11-16005.1 | CBLN1   | -0.344039578 | 1.65E-13    |
| RP11-16005.1 | STRA6   | -0.475002908 | 0           |
| RP11-16005.1 | MUC21   | -0.4675175   | 3.19E-25    |
| RP11-16005.1 | PRR36   | -0.411677309 | 0           |
| RP11-16005.1 | NFE2L3  | -0.278725849 | 3.30E-09    |
| RP11-16005.1 | NR1D1   | -0.321112882 | 7.20E-12    |
| RP11-16005.1 | MUC1    | -0.409937109 | 0           |
| RP11-16005.1 | NAT8L   | -0.273166968 | 6.87E-09    |
| RP11-16005.1 | APOC1   | -0.233473137 | 8.14E-07    |
| RP11-16005.1 | EVA1A   | -0.5338995   | 0           |
| RP11-16005.1 | ENTPD1  | -0.509297282 | 0           |
| RP11-16005.1 | COL1A1  | -0.247156591 | 1.71E-07    |
| RP11-16005.1 | FNDC4   | -0.267200305 | 1.48E-08    |
| RP11-16005.1 | FRMD3   | -0.293602011 | 4.30E-10    |
| RP11-16005.1 | SHROOM4 | -0.554171005 | 0           |
| RP11-16005.1 | NELL2   | -0.385537293 | 0           |

|              |           |              |             |
|--------------|-----------|--------------|-------------|
| RP11-16005.1 | EPHB3     | -0.494538136 | 0           |
| RP11-16005.1 | TMC6      | -0.46293895  | 0           |
| RP11-16005.1 | NOD1      | -0.538846212 | 0           |
| RP11-16005.1 | GGCT      | -0.466690117 | 0           |
| RP11-16005.1 | ICAM1     | -0.450022127 | 0           |
| RP11-16005.1 | PRSS23    | -0.386213147 | 0           |
| RP11-16005.1 | CFI       | -0.391679267 | 0           |
| RP11-16005.1 | CD55      | -0.582933589 | 0           |
| RP11-16005.1 | RASD2     | -0.6033492   | 0           |
| RP11-16005.1 | KLK11     | -0.427272028 | 6.57E-21    |
| RP11-16005.1 | ICAM5     | -0.544463955 | 0           |
| RP11-16005.1 | ADORA1    | -0.284782578 | 1.46E-09    |
| RP11-16005.1 | ITGA2     | -0.497467356 | 0           |
| RP11-16005.1 | ABCC3     | -0.480991981 | 0           |
| RP11-16005.1 | MFGE8     | -0.411017625 | 0           |
| RP11-16005.1 | STK32A    | -0.283619088 | 1.71E-09    |
| RP11-16005.1 | CYSLTR2   | -0.476756015 | 0           |
| RP11-16005.1 | LAD1      | -0.598076972 | 0           |
| RP11-16005.1 | MGAT3     | -0.597695005 | 0           |
| RP11-16005.1 | IGFBP6    | -0.282817708 | 1.91E-09    |
| RP11-16005.1 | CYP2S1    | -0.479517442 | 0           |
| RP11-16005.1 | KCNJ2     | -0.269036245 | 1.17E-08    |
| RP11-16005.1 | FAM20A    | -0.280547037 | 2.59E-09    |
| RP11-16005.1 | TGFA      | -0.454405036 | 0           |
| RP11-16005.1 | MXRA8     | -0.485623672 | 0           |
| RP11-16005.1 | C8orf4    | -0.280151737 | 2.73E-09    |
| RP11-16005.1 | CLDN10    | -0.369557318 | 1.18E-15    |
| RP11-16005.1 | PDE5A     | -0.633121098 | 0           |
| RP11-16005.1 | APOE      | -0.242527453 | 2.93E-07    |
| RP11-16005.1 | SPOCK2    | -0.582908909 | 0           |
| RP11-16005.1 | TENM1     | -0.261263003 | 3.12E-08    |
| RP11-16005.1 | SLIT1     | -0.141180993 | 0.003055129 |
| RP11-16005.1 | CXCL14    | -0.21448611  | 6.09E-06    |
| RP11-16005.1 | ECM1      | -0.029236037 | 0.541089664 |
| RP11-16005.1 | DUSP5     | -0.561840706 | 0           |
| RP11-16005.1 | SEZ6L2    | -0.376605384 | 1.97E-16    |
| RP11-16005.1 | THRSP     | -0.204598927 | 1.62E-05    |
| RP11-16005.1 | C19orf33  | -0.401585455 | 0           |
| RP11-16005.1 | MPZL2     | -0.493135508 | 0           |
| RP11-16005.1 | CTSH      | -0.425012978 | 0           |
| RP11-16005.1 | CYP1B1    | -0.497988182 | 0           |
| RP11-16005.1 | ALOX5     | -0.333064363 | 1.06E-12    |
| RP11-16005.1 | SYTL5     | -0.537141632 | 3.52E-34    |
| RP11-16005.1 | TNFRSF12A | -0.434319905 | 0           |
| RP11-16005.1 | DUSP6     | -0.477990707 | 0           |
| RP11-16005.1 | ALOX15B   | -0.434821583 | 0           |
| RP11-16005.1 | SDC4      | -0.602958439 | 0           |
| RP11-16005.1 | MDK       | -0.410635799 | 0           |
| RP11-16005.1 | KRT19     | -0.454910401 | 0           |
| RP11-16005.1 | MET       | -0.633468315 | 0           |
| RP11-16005.1 | TESC      | -0.332567649 | 1.15E-12    |



|              |          |              |             |
|--------------|----------|--------------|-------------|
| RP11-16005.1 | CXCL17   | -0.447013564 | 5.94E-23    |
| RP11-16005.1 | NPC2     | -0.337747825 | 4.84E-13    |
| RP11-16005.1 | COMP     | -0.379390356 | 7.55E-17    |
| RP11-16005.1 | TUSC3    | -0.414366967 | 0           |
| RP11-16005.1 | TMPRSS4  | -0.582999827 | 0           |
| RP11-16005.1 | LGALS3   | -0.470840413 | 0           |
| RP11-16005.1 | CRLF1    | -0.404843029 | 0           |
| RP11-16005.1 | CTXN1    | -0.490491239 | 0           |
| RP11-16005.1 | PCSK1N   | -0.153401396 | 0.001278424 |
| RP11-16005.1 | NMU      | -0.468007992 | 2.81E-25    |
| RP11-16005.1 | GALE     | -0.393729948 | 0           |
| RP11-16005.1 | PCSK2    | -0.127071602 | 0.007718139 |
| RP11-16005.1 | GJB3     | -0.549414071 | 0           |
| RP11-16005.1 | SLPI     | -0.337033108 | 5.46E-13    |
| RP11-16005.1 | AGR2     | -0.377403076 | 1.53E-16    |
| RP11-16005.1 | MRC2     | -0.38422147  | 0           |
| RP11-16005.1 | GOLT1A   | -0.369983717 | 1.09E-15    |
| RP11-16005.1 | SLC27A6  | -0.572660559 | 1.29E-39    |
| RP11-16005.1 | KCNN4    | -0.33717069  | 5.34E-13    |
| RP11-16005.1 | ETV4     | -0.568500901 | 6.04E-39    |
| RP11-16005.1 | SYT12    | -0.578513518 | 0           |
| RP11-16005.1 | PVRL4    | -0.548151862 | 0           |
| RP11-16005.1 | PLCD3    | -0.608682986 | 0           |
| RP11-16005.1 | PLAU     | -0.224628458 | 2.12E-06    |
| RP11-16005.1 | LRRK2    | -0.235959542 | 6.17E-07    |
| RP11-16005.1 | SFN      | -0.389335692 | 0           |
| RP11-16005.1 | LPAR5    | -0.549976313 | 0           |
| RP11-16005.1 | NGEF     | -0.568455848 | 0           |
| RP11-16005.1 | DTX4     | -0.611444554 | 0           |
| RP11-16005.1 | CST6     | -0.468945469 | 0           |
| RP11-16005.1 | QPCT     | -0.391196027 | 0           |
| RP11-16005.1 | TIMP1    | -0.343341314 | 1.86E-13    |
| RP11-16005.1 | CAMK2N1  | -0.466058233 | 0           |
| RP11-16005.1 | KLHDC8A  | -0.202841281 | 1.92E-05    |
| RP11-16005.1 | PDLIM4   | -0.486256124 | 0           |
| RP11-16005.1 | SCEL     | -0.491004689 | 0           |
| RP11-16005.1 | LCN2     | -0.419250419 | 0           |
| RP11-16005.1 | PROS1    | -0.606831444 | 0           |
| RP11-16005.1 | GABRB2   | -0.622506858 | 0           |
| RP11-16005.1 | TMPRSS6  | -0.565259264 | 0           |
| RP11-16005.1 | KLK7     | -0.516632139 | 2.53E-31    |
| RP11-16005.1 | PDZK1IP1 | -0.227035008 | 1.64E-06    |
| RP11-16005.1 | CDH3     | -0.46309639  | 0           |
| RP11-16005.1 | LRP4     | -0.356634857 | 1.69E-14    |
| RP11-16005.1 | IGSF1    | -0.379561979 | 7.04E-17    |
| RP11-16005.1 | B3GNT3   | -0.51776425  | 0           |
| RP11-16005.1 | CLDN1    | -0.470165694 | 0           |
| RP11-16005.1 | GDF15    | -0.507156251 | 0           |
| RP11-16005.1 | ARHGAP36 | -0.293967499 | 3.36E-10    |
| RP11-16005.1 | LAMB3    | -0.465301957 | 0           |
| RP11-16005.1 | KLK10    | -0.513483889 | 0           |

|              |           |              |          |
|--------------|-----------|--------------|----------|
| RP11-16005.1 | DPP4      | -0.501007469 | 0        |
| RP11-16005.1 | METTL7B   | -0.413000224 | 0        |
| RP11-16005.1 | LIPH      | -0.51759291  | 0        |
| RP11-16005.1 | CLDN16    | -0.436445902 | 0        |
| RP11-16005.1 | CHI3L1    | -0.288706928 | 8.52E-10 |
| RP11-16005.1 | SLC22A31  | -0.367448225 | 1.76E-15 |
| RP11-16005.1 | TACSTD2   | -0.560356522 | 0        |
| RP11-16005.1 | SFTPB     | -0.351923595 | 4.06E-14 |
| RP11-16005.1 | RXRG      | -0.393135508 | 0        |
| RP11-16005.1 | DCSTAMP   | -0.587674799 | 4.04E-42 |
| RP11-16005.1 | CITED1    | -0.327825467 | 2.48E-12 |
| RP11-16005.1 | SERPINA1  | -0.472893931 | 0        |
| RP11-16005.1 | PRR15     | -0.375833648 | 2.47E-16 |
| RP11-16005.1 | SLC34A2   | -0.588121849 | 0        |
| RP11-16005.1 | FN1       | -0.53120814  | 0        |
| RP11-16005.1 | ZCCHC12   | -0.353119282 | 3.26E-14 |
| RP11-77403.3 | TFF3      | 0.749950357  | 0        |
| RP11-77403.3 | CCL21     | 0.427514357  | 6.22E-21 |
| RP11-77403.3 | TPO       | 0.683818936  | 0        |
| RP11-77403.3 | MT1G      | 0.579637436  | 0        |
| RP11-77403.3 | DI01      | 0.63997637   | 0        |
| RP11-77403.3 | DPT       | 0.327428439  | 1.98E-12 |
| RP11-77403.3 | CDH16     | 0.645496104  | 0        |
| RP11-77403.3 | CRABP1    | 0.57634155   | 3.22E-40 |
| RP11-77403.3 | SLC26A7   | 0.716787701  | 0        |
| RP11-77403.3 | MT1H      | 0.526253418  | 1.22E-32 |
| RP11-77403.3 | SLC26A4   | 0.712199695  | 0        |
| RP11-77403.3 | SLC5A8    | 0.580035386  | 7.88E-41 |
| RP11-77403.3 | PKHD1L1   | 0.677172972  | 3.39E-60 |
| RP11-77403.3 | TFCP2L1   | 0.609638968  | 0        |
| RP11-77403.3 | WSCD2     | 0.741481643  | 9.57E-78 |
| RP11-77403.3 | IPCEF1    | 0.648044633  | 0        |
| RP11-77403.3 | SLC5A5    | 0.540016113  | 1.35E-34 |
| RP11-77403.3 | MT1F      | 0.640539889  | 0        |
| RP11-77403.3 | FOSB      | 0.466325028  | 0        |
| RP11-77403.3 | SEMA3D    | 0.70098941   | 3.81E-66 |
| RP11-77403.3 | BMP8A     | 0.69992355   | 0        |
| RP11-77403.3 | MATN2     | 0.679940542  | 0        |
| RP11-77403.3 | PLA2R1    | 0.630398108  | 0        |
| RP11-77403.3 | COL23A1   | 0.674972271  | 0        |
| RP11-77403.3 | HGD       | 0.662291322  | 0        |
| RP11-77403.3 | TCEAL2    | 0.529128524  | 0        |
| RP11-77403.3 | CHRD1     | 0.354010032  | 2.09E-14 |
| RP11-77403.3 | TNFRSF11B | 0.546108131  | 0        |
| RP11-77403.3 | FAM167A   | 0.708214639  | 0        |
| RP11-77403.3 | KIT       | 0.721625198  | 0        |
| RP11-77403.3 | SLC4A4    | 0.682858274  | 0        |
| RP11-77403.3 | SMOC2     | 0.519288573  | 0        |
| RP11-77403.3 | FHL1      | 0.752869791  | 0        |
| RP11-77403.3 | OTOS      | 0.586842337  | 0        |
| RP11-77403.3 | IGFBPL1   | 0.622094626  | 2.22E-48 |

|              |            |             |             |
|--------------|------------|-------------|-------------|
| RP11-77403.3 | HBB        | 0.397475441 | 0           |
| RP11-77403.3 | BEX1       | 0.648279657 | 0           |
| RP11-77403.3 | FABP4      | 0.60392557  | 5.57E-45    |
| RP11-77403.3 | LMOD1      | 0.70157808  | 0           |
| RP11-77403.3 | SOD3       | 0.536963324 | 0           |
| RP11-77403.3 | TMEM171    | 0.554830547 | 0           |
| RP11-77403.3 | PI16       | 0.434665562 | 0           |
| RP11-77403.3 | ZMAT4      | 0.692796396 | 4.93E-64    |
| RP11-77403.3 | MFAP4      | 0.355709512 | 2.01E-14    |
| RP11-77403.3 | CWH43      | 0.541687583 | 7.70E-35    |
| RP11-77403.3 | SPX        | 0.75198728  | 0           |
| RP11-77403.3 | APOD       | 0.231959452 | 9.62E-07    |
| RP11-77403.3 | DPP6       | 0.704183203 | 0           |
| RP11-77403.3 | MMRN1      | 0.478238354 | 0           |
| RP11-77403.3 | WDR72      | 0.612323661 | 0           |
| RP11-77403.3 | MPPED2     | 0.793230965 | 0           |
| RP11-77403.3 | PAPSS2     | 0.486649296 | 0           |
| RP11-77403.3 | DCN        | 0.139414837 | 0.003446781 |
| RP11-77403.3 | SORBS2     | 0.741297866 | 0           |
| RP11-77403.3 | EGR2       | 0.512395431 | 0           |
| RP11-77403.3 | EDN3       | 0.646909665 | 2.11E-53    |
| RP11-77403.3 | DIO2       | 0.632758278 | 0           |
| RP11-77403.3 | ITPR1      | 0.731645282 | 0           |
| RP11-77403.3 | CFD        | 0.308941271 | 4.64E-11    |
| RP11-77403.3 | CPXM1      | 0.53062292  | 0           |
| RP11-77403.3 | ELMO1      | 0.752726251 | 0           |
| RP11-77403.3 | GPC3       | 0.539075085 | 1.85E-34    |
| RP11-77403.3 | MYOC       | 0.45097748  | 2.22E-23    |
| RP11-77403.3 | DEPTOR     | 0.683644619 | 0           |
| RP11-77403.3 | DGKI       | 0.678565998 | 0           |
| RP11-77403.3 | CARTPT     | 0.605816459 | 2.52E-45    |
| RP11-77403.3 | IYD        | 0.452954326 | 0           |
| RP11-77403.3 | LYVE1      | 0.446032532 | 0           |
| RP11-77403.3 | CLCNKB     | 0.73438898  | 0           |
| RP11-77403.3 | NCAM1      | 0.334007722 | 9.04E-13    |
| RP11-77403.3 | HBA2       | 0.396023596 | 0           |
| RP11-77403.3 | GLT8D2     | 0.591783659 | 0           |
| RP11-77403.3 | OGDHL      | 0.44745374  | 0           |
| RP11-77403.3 | LIFR       | 0.623855587 | 0           |
| RP11-77403.3 | CSGALNACT1 | 0.548976078 | 0           |
| RP11-77403.3 | RAP1GAP    | 0.555322722 | 0           |
| RP11-77403.3 | COL9A3     | 0.664092654 | 0           |
| RP11-77403.3 | FBLN1      | 0.184334231 | 0.000105259 |
| RP11-77403.3 | EFEMP1     | 0.451357098 | 0           |
| RP11-77403.3 | AOX1       | 0.541821052 | 7.36E-35    |
| RP11-77403.3 | GRIN2C     | 0.674885892 | 0           |
| RP11-77403.3 | C11orf74   | 0.692560784 | 0           |
| RP11-77403.3 | PPARGC1A   | 0.50908481  | 0           |
| RP11-77403.3 | ANGPTL1    | 0.737673644 | 0           |
| RP11-77403.3 | SCARA5     | 0.328677574 | 1.62E-12    |
| RP11-77403.3 | LTF        | 0.568429891 | 0           |

|              |          |             |             |
|--------------|----------|-------------|-------------|
| RP11-77403.3 | CA4      | 0.740369309 | 2.13E-77    |
| RP11-77403.3 | TG       | 0.746427548 | 0           |
| RP11-77403.3 | FCGBP    | 0.754558929 | 0           |
| RP11-77403.3 | PBX4     | 0.812594003 | 0           |
| RP11-77403.3 | CYR61    | 0.507646723 | 0           |
| RP11-77403.3 | FOS      | 0.491141136 | 0           |
| RP11-77403.3 | KHDRBS2  | 0.756368487 | 0           |
| RP11-77403.3 | MUM1L1   | 0.52491894  | 0           |
| RP11-77403.3 | RGS16    | 0.594385945 | 0           |
| RP11-77403.3 | MT1M     | 0.522711387 | 0           |
| RP11-77403.3 | LRP2     | 0.647261409 | 0           |
| RP11-77403.3 | MAFB     | 0.530002099 | 0           |
| RP11-77403.3 | KCNK2    | 0.613301486 | 0           |
| RP11-77403.3 | TBC1D4   | 0.68633768  | 0           |
| RP11-77403.3 | MIOX     | 0.745069342 | 7.04E-79    |
| RP11-77403.3 | TPPP     | 0.612209908 | 0           |
| RP11-77403.3 | FMOD     | 0.518081256 | 0           |
| RP11-77403.3 | CITED2   | 0.449611508 | 0           |
| RP11-77403.3 | RGS8     | 0.705293264 | 2.77E-67    |
| RP11-77403.3 | ABI3BP   | 0.335808486 | 6.70E-13    |
| RP11-77403.3 | ADH1B    | 0.42044226  | 3.12E-20    |
| RP11-77403.3 | OGN      | 0.259837865 | 3.32E-08    |
| RP11-77403.3 | NR4A1    | 0.415605205 | 0           |
| RP11-77403.3 | FOXJ1    | 0.759610692 | 1.13E-83    |
| RP11-77403.3 | ALDH1A1  | 0.684058783 | 0           |
| RP11-77403.3 | OCA2     | 0.639936647 | 6.06E-52    |
| RP11-77403.3 | TMEM139  | 0.436319383 | 0           |
| RP11-77403.3 | ARHGAP24 | 0.603021556 | 0           |
| RP11-77403.3 | SLC25A15 | 0.544158863 | 0           |
| RP11-77403.3 | DES      | 0.317006709 | 1.05E-11    |
| RP11-77403.3 | GDF10    | 0.546494577 | 1.50E-35    |
| RP11-77403.3 | KIAA1324 | 0.59954754  | 0           |
| RP11-77403.3 | JUN      | 0.513555091 | 0           |
| RP11-77403.3 | C7       | 0.129391774 | 0.006665437 |
| RP11-77403.3 | LGI3     | 0.606556421 | 0           |
| RP11-77403.3 | CDON     | 0.7463389   | 0           |
| RP11-77403.3 | BCL2     | 0.649712638 | 0           |
| RP11-77403.3 | HLF      | 0.696169121 | 0           |
| RP11-77403.3 | EGR1     | 0.532006683 | 0           |
| RP11-77403.3 | IP6K3    | 0.556604646 | 0           |
| RP11-77403.3 | SCUBE3   | 0.650565221 | 0           |
| RP11-77403.3 | PKNOX2   | 0.795320935 | 0           |
| RP11-77403.3 | SMAD9    | 0.548305472 | 0           |
| RP11-77403.3 | IQGAP2   | 0.595574256 | 0           |
| RP11-77403.3 | GNA14    | 0.727994962 | 0           |
| RP11-77403.3 | LAYN     | 0.690826116 | 0           |
| RP11-77403.3 | AVPR1A   | 0.665453155 | 0           |
| RP11-77403.3 | PDLIM3   | 0.468226497 | 0           |
| RP11-77403.3 | GPM6A    | 0.551760057 | 0           |
| RP11-77403.3 | SDPR     | 0.609712156 | 0           |
| RP11-77403.3 | CRYAB    | 0.176320858 | 0.000209359 |

|              |          |             |             |
|--------------|----------|-------------|-------------|
| RP11-77403.3 | FOXA2    | 0.607585522 | 1.20E-45    |
| RP11-77403.3 | C8orf88  | 0.616161632 | 0           |
| RP11-77403.3 | ISM1     | 0.574868162 | 0           |
| RP11-77403.3 | BMP2     | 0.37665375  | 1.94E-16    |
| RP11-77403.3 | ID4      | 0.704041933 | 0           |
| RP11-77403.3 | NUPR1    | 0.193934761 | 4.45E-05    |
| RP11-77403.3 | SERTM1   | 0.451658727 | 1.87E-23    |
| RP11-77403.3 | IRS1     | 0.733687879 | 0           |
| RP11-77403.3 | FIBIN    | 0.166848833 | 0.000454801 |
| RP11-77403.3 | PODN     | 0.231584292 | 1.00E-06    |
| RP11-77403.3 | TDRD9    | 0.427410026 | 0           |
| RP11-77403.3 | EPHA3    | 0.43752741  | 0           |
| RP11-77403.3 | AIF1L    | 0.567971757 | 0           |
| RP11-77403.3 | EBF4     | 0.751551131 | 0           |
| RP11-77403.3 | ADM2     | 0.520548796 | 0           |
| RP11-77403.3 | GSTM3    | 0.635822953 | 0           |
| RP11-77403.3 | HSD17B6  | 0.556366076 | 0           |
| RP11-77403.3 | AGR3     | 0.456042055 | 6.21E-24    |
| RP11-77403.3 | EPHB1    | 0.45030112  | 0           |
| RP11-77403.3 | TMOD1    | 0.370730206 | 9.16E-16    |
| RP11-77403.3 | WASF3    | 0.666582463 | 0           |
| RP11-77403.3 | SELV     | 0.681236694 | 3.59E-61    |
| RP11-77403.3 | ENPP1    | 0.234385859 | 7.36E-07    |
| RP11-77403.3 | SYNE1    | 0.738962048 | 5.82E-77    |
| RP11-77403.3 | PLCH1    | 0.627455413 | 0           |
| RP11-77403.3 | CCDC146  | 0.809701518 | 0           |
| RP11-77403.3 | SLC16A2  | 0.750792019 | 0           |
| RP11-77403.3 | IER2     | 0.62266841  | 0           |
| RP11-77403.3 | KCNAB1   | 0.800863788 | 0           |
| RP11-77403.3 | SYNDIG1  | 0.561482709 | 0           |
| RP11-77403.3 | C16orf89 | 0.689202932 | 0           |
| RP11-77403.3 | CTGF     | 0.398112431 | 0           |
| RP11-77403.3 | NR4A3    | 0.203122403 | 1.87E-05    |
| RP11-77403.3 | KIAA1456 | 0.646024305 | 0           |
| RP11-77403.3 | AQP4     | 0.507712961 | 0           |
| RP11-77403.3 | RNF150   | 0.752690934 | 0           |
| RP11-77403.3 | C1S      | 0.043312379 | 0.365146634 |
| RP11-77403.3 | PFKFB2   | 0.423174911 | 0           |
| RP11-77403.3 | PROX1    | 0.692208035 | 0           |
| RP11-77403.3 | TCF7L1   | 0.833482357 | 0           |
| RP11-77403.3 | HSPB6    | 0.466927552 | 0           |
| RP11-77403.3 | FHDC1    | 0.518616265 | 0           |
| RP11-77403.3 | PRR15L   | 0.435053629 | 0           |
| RP11-77403.3 | SLC1A1   | 0.358945952 | 1.09E-14    |
| RP11-77403.3 | BTBD11   | 0.819626713 | 0           |
| RP11-77403.3 | TRIM58   | 0.509976115 | 0           |
| RP11-77403.3 | LRIG1    | 0.56219388  | 0           |
| RP11-77403.3 | ROR2     | 0.501400358 | 0           |
| RP11-77403.3 | GPR125   | 0.731537344 | 0           |
| RP11-77403.3 | FLRT1    | 0.823236894 | 0           |
| RP11-77403.3 | PGF      | 0.697018867 | 0           |

|              |          |              |             |
|--------------|----------|--------------|-------------|
| RP11-77403.3 | DUSP1    | 0.434240335  | 0           |
| RP11-77403.3 | PLA2G7   | 0.548972106  | 0           |
| RP11-77403.3 | PLSCR4   | 0.496191389  | 0           |
| RP11-77403.3 | FAM46B   | 0.303048647  | 1.11E-10    |
| RP11-77403.3 | GLDC     | 0.531088004  | 0           |
| RP11-77403.3 | ZBTB16   | 0.479749487  | 0           |
| RP11-77403.3 | OMD      | 0.152329361  | 0.001368298 |
| RP11-77403.3 | HSD11B2  | 0.750543094  | 0           |
| RP11-77403.3 | FGL2     | 0.17520304   | 0.000229909 |
| RP11-77403.3 | CLCNKA   | 0.747974947  | 8.24E-80    |
| RP11-77403.3 | GATM     | 0.486680217  | 0           |
| RP11-77403.3 | TNS3     | 0.526525671  | 0           |
| RP11-77403.3 | TOB1     | 0.453880238  | 0           |
| RP11-77403.3 | MARC2    | 0.677227907  | 0           |
| RP11-77403.3 | LRRC2    | 0.510776502  | 0           |
| RP11-77403.3 | SORD     | 0.513241773  | 0           |
| RP11-77403.3 | RIMS4    | 0.632706791  | 0           |
| RP11-77403.3 | SLC29A4  | 0.754176252  | 0           |
| RP11-77403.3 | SLC39A14 | 0.536852974  | 0           |
| RP11-77403.3 | FAXDC2   | 0.742161655  | 0           |
| RP11-77403.3 | HSPB8    | 0.213170003  | 6.96E-06    |
| RP11-77403.3 | CCL19    | -0.040590139 | 0.396224831 |
| RP11-77403.3 | KCNIP3   | 0.714215343  | 0           |
| RP11-77403.3 | CGNL1    | 0.608565828  | 0           |
| RP11-77403.3 | ATF3     | 0.165259406  | 0.000516022 |
| RP11-77403.3 | SGCD     | 0.373399723  | 4.77E-16    |
| RP11-77403.3 | STARD13  | 0.709336429  | 0           |
| RP11-77403.3 | LDHD     | 0.622372113  | 0           |
| RP11-77403.3 | RCAN1    | 0.436415265  | 0           |
| RP11-77403.3 | ID3      | 0.474532434  | 0           |
| RP11-77403.3 | SYTL3    | 0.63432955   | 0           |
| RP11-77403.3 | MT1E     | 0.419230846  | 0           |
| RP11-77403.3 | CAMK1D   | 0.645969414  | 0           |
| RP11-77403.3 | PRKCQ    | 0.715333729  | 0           |
| RP11-77403.3 | NUAK2    | 0.479395745  | 0           |
| RP11-77403.3 | LIPG     | 0.736379238  | 0           |
| RP11-77403.3 | SLC25A25 | 0.319490975  | 9.28E-12    |
| RP11-77403.3 | PRKX     | 0.423597727  | 0           |
| RP11-77403.3 | SRPX     | 0.275436929  | 5.10E-09    |
| RP11-77403.3 | FAM189A1 | 0.727248757  | 0           |
| RP11-77403.3 | PLEKHH1  | 0.725526003  | 0           |
| RP11-77403.3 | WNT11    | 0.613725863  | 0           |
| RP11-77403.3 | SNAI1    | 0.514703263  | 0           |
| RP11-77403.3 | FDCSP    | 0.025556346  | 0.593323908 |
| RP11-77403.3 | MT1X     | 0.412443088  | 0           |
| RP11-77403.3 | ACACB    | 0.744974569  | 0           |
| RP11-77403.3 | ARC      | 0.313106602  | 2.48E-11    |
| RP11-77403.3 | KLK4     | 0.155128906  | 0.001110962 |
| RP11-77403.3 | ZFPM2    | 0.540445283  | 0           |
| RP11-77403.3 | AKAP12   | 0.500951018  | 0           |
| RP11-77403.3 | GJB6     | 0.51112138   | 1.37E-30    |

|              |          |             |             |
|--------------|----------|-------------|-------------|
| RP11-77403.3 | ERO1LB   | 0.709458835 | 0           |
| RP11-77403.3 | DNALI1   | 0.721841216 | 0           |
| RP11-77403.3 | HKDC1    | 0.354435389 | 2.56E-14    |
| RP11-77403.3 | ZFP36L2  | 0.594270915 | 0           |
| RP11-77403.3 | CAPSL    | 0.702918462 | 1.18E-66    |
| RP11-77403.3 | CYP7B1   | 0.528712942 | 0           |
| RP11-77403.3 | CPQ      | 0.707435528 | 0           |
| RP11-77403.3 | RPS6KA6  | 0.779694198 | 6.93E-91    |
| RP11-77403.3 | TLE1     | 0.524016572 | 0           |
| RP11-77403.3 | TP53INP2 | 0.725324027 | 0           |
| RP11-77403.3 | KATNAL2  | 0.761808225 | 0           |
| RP11-77403.3 | SGPP2    | 0.210535378 | 9.06E-06    |
| RP11-77403.3 | CTH      | 0.54137999  | 0           |
| RP11-77403.3 | KIF12    | 0.60176956  | 0           |
| RP11-77403.3 | TMEM220  | 0.657181356 | 0           |
| RP11-77403.3 | CENPJ    | 0.623207108 | 0           |
| RP11-77403.3 | FAM155B  | 0.59383817  | 0           |
| RP11-77403.3 | WFS1     | 0.639688157 | 0           |
| RP11-77403.3 | SELENBP1 | 0.671363083 | 0           |
| RP11-77403.3 | SNTA1    | 0.447211198 | 0           |
| RP11-77403.3 | FRAS1    | 0.288336449 | 8.97E-10    |
| RP11-77403.3 | FBLN7    | 0.52939532  | 0           |
| RP11-77403.3 | AGPAT9   | 0.605445978 | 0           |
| RP11-77403.3 | GPR83    | 0.66412017  | 0           |
| RP11-77403.3 | PRTG     | 0.63015273  | 0           |
| RP11-77403.3 | EGR3     | 0.324687178 | 4.10E-12    |
| RP11-77403.3 | GRAMD2   | 0.489884459 | 0           |
| RP11-77403.3 | HYOU1    | 0.616745008 | 0           |
| RP11-77403.3 | FBLN5    | 0.447872869 | 0           |
| RP11-77403.3 | ITM2A    | 0.690559888 | 0           |
| RP11-77403.3 | SRF      | 0.594471047 | 0           |
| RP11-77403.3 | FGFR2    | 0.641912872 | 0           |
| RP11-77403.3 | MT1A     | 0.1932826   | 4.57E-05    |
| RP11-77403.3 | MAMDC2   | 0.348978205 | 6.91E-14    |
| RP11-77403.3 | FHL2     | 0.324807172 | 4.02E-12    |
| RP11-77403.3 | FTCDNL1  | 0.454901182 | 0           |
| RP11-77403.3 | PKIA     | 0.654110298 | 0           |
| RP11-77403.3 | DNAJB4   | 0.561676742 | 0           |
| RP11-77403.3 | SLC25A33 | 0.586749433 | 0           |
| RP11-77403.3 | EYA2     | 0.35508784  | 2.26E-14    |
| RP11-77403.3 | LPAR1    | 0.211151944 | 8.52E-06    |
| RP11-77403.3 | STX11    | 0.133395269 | 0.005147955 |
| RP11-77403.3 | ARHGEF28 | 0.424238689 | 0           |
| RP11-77403.3 | OR2W3    | 0.573839843 | 0           |
| RP11-77403.3 | ALDH1B1  | 0.397539565 | 4.50E-18    |
| RP11-77403.3 | CXCL12   | 0.300091343 | 1.70E-10    |
| RP11-77403.3 | OLFM2    | 0.687853068 | 0           |
| RP11-77403.3 | TUB      | 0.600172899 | 0           |
| RP11-77403.3 | HTRA3    | 0.388604379 | 0           |
| RP11-77403.3 | CKB      | 0.459200124 | 0           |
| RP11-77403.3 | RGS2     | 0.021655835 | 0.650785048 |

|              |          |             |             |
|--------------|----------|-------------|-------------|
| RP11-77403.3 | SHANK2   | 0.773358306 | 0           |
| RP11-77403.3 | CNTFR    | 0.599099797 | 4.10E-44    |
| RP11-77403.3 | CYTH3    | 0.696790084 | 0           |
| RP11-77403.3 | PLAC9    | 0.503084958 | 0           |
| RP11-77403.3 | WVOX     | 0.759873283 | 0           |
| RP11-77403.3 | NPR3     | 0.558925527 | 0           |
| RP11-77403.3 | SDC2     | 0.629004842 | 0           |
| RP11-77403.3 | KLF15    | 0.619027877 | 0           |
| RP11-77403.3 | TMEM164  | 0.644477429 | 0           |
| RP11-77403.3 | LONRF3   | 0.357958056 | 1.31E-14    |
| RP11-77403.3 | GBP1     | 0.167589081 | 0.000428659 |
| RP11-77403.3 | ARHGAP6  | 0.483622066 | 0           |
| RP11-77403.3 | TMEM119  | 0.144748197 | 0.002384866 |
| RP11-77403.3 | SH3RF1   | 0.514240022 | 0           |
| RP11-77403.3 | CRELD2   | 0.639792407 | 0           |
| RP11-77403.3 | PCP4     | 0.157159797 | 0.000965339 |
| RP11-77403.3 | GCSH     | 0.732050086 | 0           |
| RP11-77403.3 | IMPA2    | 0.62140067  | 0           |
| RP11-77403.3 | C1R      | 0.032482689 | 0.497098702 |
| RP11-77403.3 | SUCNR1   | 0.441330347 | 0           |
| RP11-77403.3 | SFRP1    | 0.493923981 | 0           |
| RP11-77403.3 | UGT8     | 0.421787176 | 0           |
| RP11-77403.3 | TLE4     | 0.412968169 | 0           |
| RP11-77403.3 | ANTXR1   | 0.47259196  | 0           |
| RP11-77403.3 | GPX3     | 0.436398103 | 0           |
| RP11-77403.3 | DPY19L2  | 0.702723131 | 0           |
| RP11-77403.3 | FAM46C   | 0.448367738 | 0           |
| RP11-77403.3 | IL33     | 0.320109609 | 6.44E-12    |
| RP11-77403.3 | PEG3     | 0.689488308 | 0           |
| RP11-77403.3 | FAHD2A   | 0.671386486 | 0           |
| RP11-77403.3 | PTGDS    | 0.122491681 | 0.010241391 |
| RP11-77403.3 | CHCHD10  | 0.334055804 | 8.97E-13    |
| RP11-77403.3 | CD36     | 0.60278483  | 0           |
| RP11-77403.3 | ANKRD37  | 0.663449848 | 0           |
| RP11-77403.3 | TSPAN33  | 0.527515836 | 0           |
| RP11-77403.3 | PRDM16   | 0.78103056  | 0           |
| RP11-77403.3 | UST      | 0.639669434 | 0           |
| RP11-77403.3 | NEXN     | 0.593818738 | 0           |
| RP11-77403.3 | NUPR1L   | 0.308888404 | 3.69E-11    |
| RP11-77403.3 | SLC24A3  | 0.475061061 | 0           |
| RP11-77403.3 | MARC1    | 0.763758344 | 0           |
| RP11-77403.3 | MYH11    | 0.466118372 | 0           |
| RP11-77403.3 | APOA1    | 0.630333666 | 5.36E-50    |
| RP11-77403.3 | TMEM178B | 0.513743167 | 0           |
| RP11-77403.3 | CAPN6    | 0.363453651 | 3.72E-15    |
| RP11-77403.3 | PPM1L    | 0.641469773 | 0           |
| RP11-77403.3 | FZD8     | 0.708384418 | 0           |
| RP11-77403.3 | RCAN2    | 0.667957432 | 0           |
| RP11-77403.3 | COPZ2    | 0.523267247 | 0           |
| RP11-77403.3 | GAS1     | 0.263138232 | 2.47E-08    |
| RP11-77403.3 | DACT1    | 0.530430022 | 0           |



|              |          |             |             |
|--------------|----------|-------------|-------------|
| RP11-77403.3 | WBSR17   | 0.761257897 | 0           |
| RP11-77403.3 | NCS1     | 0.546873484 | 0           |
| RP11-77403.3 | SPIRE2   | 0.58738302  | 0           |
| RP11-77403.3 | C15orf52 | 0.345933813 | 1.19E-13    |
| RP11-77403.3 | SPAG5    | 0.542211014 | 0           |
| RP11-77403.3 | ARL4D    | 0.424679093 | 0           |
| RP11-77403.3 | FAM189A2 | 0.776777432 | 0           |
| RP11-77403.3 | MAP1LC3A | 0.686575257 | 0           |
| RP11-77403.3 | KLF6     | 0.094476578 | 0.047925052 |
| RP11-77403.3 | ADD3     | 0.493758315 | 0           |
| RP11-77403.3 | TSPAN7   | 0.668607471 | 0           |
| RP11-77403.3 | KLF9     | 0.489301793 | 0           |
| RP11-77403.3 | KCNQ1    | 0.633369455 | 0           |
| RP11-77403.3 | MAN1A1   | 0.20838683  | 1.12E-05    |
| RP11-77403.3 | MLF1     | 0.437377488 | 0           |
| RP11-77403.3 | RARB     | 0.732591762 | 0           |
| RP11-77403.3 | CDC42EP2 | 0.529632755 | 0           |
| RP11-77403.3 | FAM3B    | 0.194407646 | 4.26E-05    |
| RP11-77403.3 | GADD45B  | 0.252114792 | 9.53E-08    |
| RP11-77403.3 | TMEM47   | 0.611660005 | 0           |
| RP11-77403.3 | SDF2L1   | 0.558338605 | 0           |
| RP11-77403.3 | CCDC85A  | 0.393331527 | 0           |
| RP11-77403.3 | CRYBG3   | 0.186809572 | 8.46E-05    |
| RP11-77403.3 | FBLN2    | 0.09675349  | 0.042777871 |
| RP11-77403.3 | PEBP4    | 0.179842532 | 0.000155308 |
| RP11-77403.3 | CDADC1   | 0.740857179 | 0           |
| RP11-77403.3 | FAM63A   | 0.619372683 | 0           |
| RP11-77403.3 | GLUL     | 0.414016913 | 0           |
| RP11-77403.3 | FREM2    | 0.368217136 | 1.62E-15    |
| RP11-77403.3 | ACKR3    | 0.663833375 | 0           |
| RP11-77403.3 | DENND6A  | 0.734593934 | 0           |
| RP11-77403.3 | CLDN8    | 0.121697819 | 0.010746513 |
| RP11-77403.3 | UTS2R    | 0.361523545 | 5.32E-15    |
| RP11-77403.3 | SCNN1B   | 0.548269303 | 0           |
| RP11-77403.3 | TTC30A   | 0.613297515 | 0           |
| RP11-77403.3 | CORO2B   | 0.744316728 | 0           |
| RP11-77403.3 | TC2N     | 0.273675738 | 6.43E-09    |
| RP11-77403.3 | ALDH2    | 0.555389811 | 0           |
| RP11-77403.3 | GPR183   | -0.01858265 | 0.697702467 |
| RP11-77403.3 | C4orf47  | 0.731766411 | 0           |
| RP11-77403.3 | SLC25A42 | 0.791933864 | 0           |
| RP11-77403.3 | LGMN     | 0.495984165 | 0           |
| RP11-77403.3 | ACSF2    | 0.585081996 | 0           |
| RP11-77403.3 | KIAA1467 | 0.589631848 | 0           |
| RP11-77403.3 | PRKG1    | 0.718224369 | 0           |
| RP11-77403.3 | GNAI1    | 0.642619505 | 0           |
| RP11-77403.3 | ABCC4    | 0.363076816 | 4.80E-15    |
| RP11-77403.3 | PRPS1    | 0.58868934  | 0           |
| RP11-77403.3 | TSPAN5   | 0.36766468  | 1.83E-15    |
| RP11-77403.3 | CR2      | 0.185680291 | 9.10E-05    |
| RP11-77403.3 | CCDC170  | 0.522668836 | 0           |

|              |          |              |             |
|--------------|----------|--------------|-------------|
| RP11-77403.3 | RRAD     | -0.041889469 | 0.381122162 |
| RP11-77403.3 | SCGB2A1  | 0.433477534  | 0           |
| RP11-77403.3 | SESN3    | 0.383821348  | 0           |
| RP11-77403.3 | SGK223   | 0.40428334   | 0           |
| RP11-77403.3 | NDRG2    | 0.705016921  | 0           |
| RP11-77403.3 | C3orf52  | 0.235440986  | 6.54E-07    |
| RP11-77403.3 | FLRT3    | -0.282640695 | 1.95E-09    |
| RP11-77403.3 | MST1R    | -0.555225422 | 0           |
| RP11-77403.3 | SDC1     | -0.576714031 | 0           |
| RP11-77403.3 | ST8SIA4  | -0.57094055  | 0           |
| RP11-77403.3 | UBTD1    | -0.302995742 | 1.12E-10    |
| RP11-77403.3 | EPHA2    | -0.322077233 | 6.19E-12    |
| RP11-77403.3 | TMEM130  | -0.065371174 | 0.17148595  |
| RP11-77403.3 | SPINK2   | -0.598524894 | 0           |
| RP11-77403.3 | MMP16    | -0.542411997 | 0           |
| RP11-77403.3 | SIGLEC15 | -0.454055549 | 0           |
| RP11-77403.3 | RIN1     | -0.450868894 | 0           |
| RP11-77403.3 | IL1RN    | -0.709143105 | 0           |
| RP11-77403.3 | FCER1G   | -0.392065064 | 0           |
| RP11-77403.3 | CD276    | -0.548964731 | 0           |
| RP11-77403.3 | CTSB     | -0.539721347 | 0           |
| RP11-77403.3 | FAM171A2 | 0.020809635  | 0.663576429 |
| RP11-77403.3 | ASPHD1   | -0.596519884 | 0           |
| RP11-77403.3 | C15orf48 | -0.558142302 | 0           |
| RP11-77403.3 | DYSF     | -0.003221972 | 0.946309634 |
| RP11-77403.3 | PDZRN4   | 0.019039649  | 0.690646761 |
| RP11-77403.3 | EFHD2    | -0.133263786 | 0.005192374 |
| RP11-77403.3 | ASF1B    | -0.502293081 | 0           |
| RP11-77403.3 | AQP1     | -0.042128607 | 0.378407765 |
| RP11-77403.3 | ARRDC2   | -0.3281585   | 2.35E-12    |
| RP11-77403.3 | PRSS1    | -0.340252253 | 2.33E-13    |
| RP11-77403.3 | MAPK13   | -0.627795964 | 0           |
| RP11-77403.3 | CST5     | -0.585652078 | 8.95E-42    |
| RP11-77403.3 | AHR      | -0.49377718  | 0           |
| RP11-77403.3 | BAX      | -0.513597784 | 0           |
| RP11-77403.3 | C1orf115 | -0.151929127 | 0.001424748 |
| RP11-77403.3 | PLK3     | -0.428849531 | 0           |
| RP11-77403.3 | JAG2     | -0.109283382 | 0.022058341 |
| RP11-77403.3 | RAD23B   | -0.494516718 | 0           |
| RP11-77403.3 | CA12     | 0.187656198  | 7.85E-05    |
| RP11-77403.3 | ADTRP    | -0.244694866 | 2.28E-07    |
| RP11-77403.3 | UCP2     | -0.254167175 | 7.45E-08    |
| RP11-77403.3 | IGFBP2   | -0.208092376 | 1.15E-05    |
| RP11-77403.3 | LOXL2    | -0.206307923 | 1.38E-05    |
| RP11-77403.3 | GPX1     | -0.487745697 | 0           |
| RP11-77403.3 | P3H3     | -0.402624271 | 0           |
| RP11-77403.3 | C2orf81  | -0.190516628 | 6.07E-05    |
| RP11-77403.3 | CDT1     | -0.548464613 | 0           |
| RP11-77403.3 | SNX25    | -0.192116976 | 5.25E-05    |
| RP11-77403.3 | MTHFD1L  | -0.589766167 | 0           |
| RP11-77403.3 | CDC42BPG | -0.617696828 | 1.55E-47    |

|              |          |              |             |
|--------------|----------|--------------|-------------|
| RP11-77403.3 | MSN      | -0.590406562 | 0           |
| RP11-77403.3 | SIGLEC6  | -0.40849895  | 4.38E-19    |
| RP11-77403.3 | F2R      | -0.107889407 | 0.023819493 |
| RP11-77403.3 | TMEM184A | -0.583352718 | 0           |
| RP11-77403.3 | CKS2     | -0.396928801 | 0           |
| RP11-77403.3 | TAX1BP3  | -0.559358272 | 0           |
| RP11-77403.3 | PMEP1    | -0.416146597 | 0           |
| RP11-77403.3 | CXCL16   | -0.67430748  | 0           |
| RP11-77403.3 | FAXC     | -0.60428263  | 0           |
| RP11-77403.3 | VTCN1    | -0.645593891 | 4.01E-53    |
| RP11-77403.3 | SH2D4A   | -0.506926758 | 0           |
| RP11-77403.3 | RNF24    | -0.358271374 | 1.24E-14    |
| RP11-77403.3 | LY6G6C   | -0.54252807  | 5.80E-35    |
| RP11-77403.3 | NID1     | -0.296520451 | 2.84E-10    |
| RP11-77403.3 | STAC     | -0.678587841 | 0           |
| RP11-77403.3 | RAB34    | -0.390657188 | 0           |
| RP11-77403.3 | HES4     | -0.26000122  | 3.65E-08    |
| RP11-77403.3 | EPA10    | -0.578317641 | 0           |
| RP11-77403.3 | ENTPD2   | -0.323609216 | 4.86E-12    |
| RP11-77403.3 | DDB2     | -0.587026016 | 0           |
| RP11-77403.3 | NKAIN4   | -0.243417339 | 2.65E-07    |
| RP11-77403.3 | TRIM29   | -0.431519473 | 0           |
| RP11-77403.3 | ADCY8    | -0.60326757  | 7.32E-45    |
| RP11-77403.3 | SFTA2    | -0.569890814 | 0           |
| RP11-77403.3 | NRIP1    | -0.406062119 | 0           |
| RP11-77403.3 | VWA1     | 0.065239832  | 0.172349606 |
| RP11-77403.3 | APLNR    | -0.064621706 | 0.176457813 |
| RP11-77403.3 | REN      | -0.453551782 | 1.17E-23    |
| RP11-77403.3 | EDIL3    | -0.179698142 | 0.000157238 |
| RP11-77403.3 | AGRN     | -0.311279172 | 3.27E-11    |
| RP11-77403.3 | TREM1    | -0.558688092 | 0           |
| RP11-77403.3 | SRL      | -0.302205    | 1.25E-10    |
| RP11-77403.3 | RASGRF1  | -0.397507496 | 0           |
| RP11-77403.3 | RMI2     | -0.451040234 | 0           |
| RP11-77403.3 | SAMD1    | -0.386308036 | 0           |
| RP11-77403.3 | MGAT4B   | -0.638735579 | 0           |
| RP11-77403.3 | NXN      | -0.538157025 | 0           |
| RP11-77403.3 | SH3BGRL3 | -0.540382308 | 0           |
| RP11-77403.3 | CA11     | -0.18949384  | 6.66E-05    |
| RP11-77403.3 | PLD3     | -0.166422045 | 0.000470539 |
| RP11-77403.3 | LURAP1L  | -0.676166539 | 0           |
| RP11-77403.3 | CARNS1   | -0.113413538 | 0.017487079 |
| RP11-77403.3 | PDLIM7   | -0.316900745 | 1.39E-11    |
| RP11-77403.3 | BCL2L1   | -0.687888811 | 0           |
| RP11-77403.3 | GGT6     | -0.321490027 | 6.79E-12    |
| RP11-77403.3 | DPYSL3   | -0.31659154  | 1.45E-11    |
| RP11-77403.3 | FYN      | -0.465499253 | 0           |
| RP11-77403.3 | TK1      | -0.501376246 | 0           |
| RP11-77403.3 | AK1      | -0.283083936 | 1.84E-09    |
| RP11-77403.3 | HIGD1B   | 0.101786439  | 0.033034598 |
| RP11-77403.3 | TMEM59L  | -0.263234397 | 2.44E-08    |

|              |          |              |             |
|--------------|----------|--------------|-------------|
| RP11-77403.3 | MEGF9    | -0.442823467 | 0           |
| RP11-77403.3 | ZFP36L1  | -0.460395243 | 0           |
| RP11-77403.3 | ADRA1B   | -0.258648094 | 4.31E-08    |
| RP11-77403.3 | EPHA4    | -0.494842944 | 0           |
| RP11-77403.3 | TCERG1L  | 0.031029851  | 0.516546329 |
| RP11-77403.3 | NGFR     | -0.13803774  | 0.003783193 |
| RP11-77403.3 | EBI3     | -0.565616836 | 0           |
| RP11-77403.3 | S100A10  | -0.593924548 | 0           |
| RP11-77403.3 | S100B    | -0.482649064 | 0           |
| RP11-77403.3 | CD44     | -0.141118159 | 0.003068337 |
| RP11-77403.3 | BHLHE41  | -0.32685062  | 2.90E-12    |
| RP11-77403.3 | FBXO2    | -0.342266472 | 2.24E-13    |
| RP11-77403.3 | SLC30A2  | -0.562374013 | 0           |
| RP11-77403.3 | FRMD5    | -0.768901642 | 0           |
| RP11-77403.3 | SAMD11   | -0.180764332 | 0.000143498 |
| RP11-77403.3 | SIPA1L2  | -0.298594536 | 2.11E-10    |
| RP11-77403.3 | S100A16  | -0.630792983 | 0           |
| RP11-77403.3 | PPL      | -0.645148319 | 0           |
| RP11-77403.3 | ARHGDIB  | -0.159586346 | 0.000802596 |
| RP11-77403.3 | CDC42EP3 | -0.661972898 | 0           |
| RP11-77403.3 | RUNX2    | -0.349964399 | 5.79E-14    |
| RP11-77403.3 | LAMC2    | -0.666730541 | 0           |
| RP11-77403.3 | BRINP1   | -0.437705557 | 0           |
| RP11-77403.3 | GPRC5B   | -0.411821274 | 0           |
| RP11-77403.3 | AQP5     | -0.009269624 | 0.846373207 |
| RP11-77403.3 | PLAG1    | -0.187873351 | 7.70E-05    |
| RP11-77403.3 | PTPRU    | -0.526030234 | 0           |
| RP11-77403.3 | ANGPTL4  | -0.479447232 | 0           |
| RP11-77403.3 | PALM3    | -0.212474576 | 7.46E-06    |
| RP11-77403.3 | ACP5     | -0.457488433 | 0           |
| RP11-77403.3 | DLG4     | -0.161325128 | 0.000702026 |
| RP11-77403.3 | ETNK2    | -0.360341487 | 8.28E-15    |
| RP11-77403.3 | CD109    | -0.415795692 | 0           |
| RP11-77403.3 | SNX22    | -0.194397717 | 4.26E-05    |
| RP11-77403.3 | TMEM98   | -0.41412173  | 0           |
| RP11-77403.3 | CTHRC1   | -0.394926344 | 0           |
| RP11-77403.3 | S100A2   | -0.58566055  | 0           |
| RP11-77403.3 | C11orf80 | -0.621926035 | 0           |
| RP11-77403.3 | SREBF1   | -0.482293194 | 0           |
| RP11-77403.3 | PRSS22   | -0.572508418 | 0           |
| RP11-77403.3 | CMTM3    | -0.507364042 | 0           |
| RP11-77403.3 | RDH5     | -0.35906013  | 1.06E-14    |
| RP11-77403.3 | MYH10    | -0.480285064 | 0           |
| RP11-77403.3 | EVPL     | -0.438303826 | 0           |
| RP11-77403.3 | SCD      | -0.552527821 | 0           |
| RP11-77403.3 | CD151    | -0.415683499 | 0           |
| RP11-77403.3 | S100A4   | -0.537451527 | 0           |
| RP11-77403.3 | BNIP1    | -0.277277692 | 4.00E-09    |
| RP11-77403.3 | MAP3K6   | -0.56674515  | 0           |
| RP11-77403.3 | MANEAL   | -0.548832255 | 0           |
| RP11-77403.3 | CD207    | -0.442751444 | 1.68E-22    |

|              |          |              |             |
|--------------|----------|--------------|-------------|
| RP11-77403.3 | CD1A     | -0.495263873 | 1.51E-28    |
| RP11-77403.3 | C3       | -0.391841954 | 0           |
| RP11-77403.3 | NT5E     | -0.463984432 | 0           |
| RP11-77403.3 | CACNG4   | -0.53153531  | 2.22E-33    |
| RP11-77403.3 | FHOD1    | -0.358774187 | 1.12E-14    |
| RP11-77403.3 | LEMD1    | -0.586436682 | 0           |
| RP11-77403.3 | ATP11A   | -0.201044063 | 2.28E-05    |
| RP11-77403.3 | PPAP2C   | -0.326080586 | 3.28E-12    |
| RP11-77403.3 | DRAM1    | -0.525302184 | 0           |
| RP11-77403.3 | CDA      | -0.105637175 | 0.02692211  |
| RP11-77403.3 | CCND2    | -0.140490104 | 0.003203244 |
| RP11-77403.3 | LCN6     | -0.037910159 | 0.428170481 |
| RP11-77403.3 | CDH4     | -0.420432064 | 0           |
| RP11-77403.3 | MMP11    | -0.546684415 | 0           |
| RP11-77403.3 | B3GAT1   | -0.256067367 | 5.91E-08    |
| RP11-77403.3 | SPP1     | -0.403345229 | 0           |
| RP11-77403.3 | HLA-DQB1 | -0.523958419 | 0           |
| RP11-77403.3 | SDC3     | -0.376902816 | 1.80E-16    |
| RP11-77403.3 | CX3CL1   | -0.418900649 | 0           |
| RP11-77403.3 | SDK1     | -0.223203136 | 2.47E-06    |
| RP11-77403.3 | DOCK9    | -0.46167121  | 0           |
| RP11-77403.3 | CSF2     | -0.596424698 | 1.22E-43    |
| RP11-77403.3 | GRHL3    | -0.651074842 | 0           |
| RP11-77403.3 | TMEM92   | -0.64507706  | 5.15E-53    |
| RP11-77403.3 | BASP1    | -0.547783227 | 0           |
| RP11-77403.3 | HRH1     | -0.528508838 | 0           |
| RP11-77403.3 | ESM1     | 0.060332693  | 0.206985946 |
| RP11-77403.3 | B4GALNT3 | -0.488848056 | 0           |
| RP11-77403.3 | LMO3     | -0.237551806 | 5.16E-07    |
| RP11-77403.3 | C9orf16  | -0.55731369  | 0           |
| RP11-77403.3 | SEMA3F   | -0.092257537 | 0.053431162 |
| RP11-77403.3 | PLA2G12B | -0.261871476 | 2.57E-08    |
| RP11-77403.3 | KLK6     | -0.357275301 | 1.16E-14    |
| RP11-77403.3 | ST3GAL5  | -0.323844098 | 4.68E-12    |
| RP11-77403.3 | FAM132B  | -0.103689326 | 0.029880075 |
| RP11-77403.3 | CDKN1A   | -0.437828388 | 0           |
| RP11-77403.3 | E2F1     | -0.587507127 | 0           |
| RP11-77403.3 | B3GNT8   | -0.348366604 | 7.71E-14    |
| RP11-77403.3 | MTMR11   | -0.530898368 | 0           |
| RP11-77403.3 | MYO1G    | -0.511606958 | 0           |
| RP11-77403.3 | TMSB10   | -0.493686971 | 0           |
| RP11-77403.3 | UNC5CL   | -0.658569232 | 0           |
| RP11-77403.3 | ABR      | -0.587271678 | 0           |
| RP11-77403.3 | PLP2     | -0.597679686 | 0           |
| RP11-77403.3 | SRCIN1   | -0.500063969 | 0           |
| RP11-77403.3 | PDE9A    | -0.624792989 | 0           |
| RP11-77403.3 | TREM2    | -0.381156795 | 3.24E-17    |
| RP11-77403.3 | KDEL3    | -0.435202274 | 0           |
| RP11-77403.3 | PC       | -0.454483614 | 0           |
| RP11-77403.3 | C2CD4A   | -0.686341084 | 0           |
| RP11-77403.3 | PELI1    | -0.533216554 | 0           |

|              |          |              |             |
|--------------|----------|--------------|-------------|
| RP11-77403.3 | SSX1     | -0.250120278 | 1.21E-07    |
| RP11-77403.3 | MROH6    | -0.529292346 | 0           |
| RP11-77403.3 | ESPN     | -0.38640406  | 0           |
| RP11-77403.3 | BMP1     | -0.289145063 | 8.02E-10    |
| RP11-77403.3 | TM4SF4   | -0.489165267 | 8.63E-28    |
| RP11-77403.3 | CORO2A   | -0.517149102 | 0           |
| RP11-77403.3 | CD164L2  | -0.523473    | 2.96E-32    |
| RP11-77403.3 | CTSS     | -0.536979351 | 0           |
| RP11-77403.3 | CLU      | -0.325508415 | 3.60E-12    |
| RP11-77403.3 | TMSB4X   | -0.507432833 | 0           |
| RP11-77403.3 | WNT10A   | -0.401351793 | 2.02E-18    |
| RP11-77403.3 | NAPSA    | -0.412851721 | 0           |
| RP11-77403.3 | PLEKHA4  | -0.337836757 | 4.77E-13    |
| RP11-77403.3 | SFTPA1   | -0.078395927 | 0.100917995 |
| RP11-77403.3 | C1orf116 | -0.539178962 | 0           |
| RP11-77403.3 | TM4SF1   | -0.520801976 | 0           |
| RP11-77403.3 | SEL1L3   | -0.45282029  | 0           |
| RP11-77403.3 | VASN     | -0.521741363 | 0           |
| RP11-77403.3 | NPTXR    | -0.616127449 | 0           |
| RP11-77403.3 | PDE4C    | -0.572687984 | 0           |
| RP11-77403.3 | CDC42EP1 | -0.488021003 | 0           |
| RP11-77403.3 | ENDOD1   | -0.630726036 | 0           |
| RP11-77403.3 | RYR1     | -0.450056451 | 0           |
| RP11-77403.3 | IL1RAP   | -0.502575195 | 0           |
| RP11-77403.3 | SLC35F2  | -0.532403066 | 1.67E-33    |
| RP11-77403.3 | ISYNA1   | -0.219644868 | 3.59E-06    |
| RP11-77403.3 | HLA-G    | -0.584164593 | 0           |
| RP11-77403.3 | CDKN2B   | -0.617009818 | 0           |
| RP11-77403.3 | ALDH1A3  | -0.564724538 | 0           |
| RP11-77403.3 | CLIP3    | -0.309387065 | 4.34E-11    |
| RP11-77403.3 | ULBP2    | -0.500090634 | 0           |
| RP11-77403.3 | ETHE1    | -0.705382861 | 0           |
| RP11-77403.3 | XPR1     | -0.490700023 | 0           |
| RP11-77403.3 | SPTBN2   | -0.70549009  | 0           |
| RP11-77403.3 | IVL      | -0.64636026  | 2.76E-53    |
| RP11-77403.3 | MARCO    | -0.542609434 | 0           |
| RP11-77403.3 | PLXND1   | -0.113607571 | 0.017294371 |
| RP11-77403.3 | EMILIN2  | -0.510670407 | 0           |
| RP11-77403.3 | PLAUR    | -0.611646531 | 0           |
| RP11-77403.3 | CDC42EP5 | -0.470940976 | 0           |
| RP11-77403.3 | TRPC5    | -0.197937327 | 2.96E-05    |
| RP11-77403.3 | TMEM100  | -0.356167078 | 1.85E-14    |
| RP11-77403.3 | QSOX1    | -0.56037879  | 0           |
| RP11-77403.3 | ARHGAP23 | -0.372729542 | 5.65E-16    |
| RP11-77403.3 | MDF1     | -0.242731982 | 2.86E-07    |
| RP11-77403.3 | FSTL3    | -0.498938207 | 0           |
| RP11-77403.3 | INF2     | -0.427359248 | 0           |
| RP11-77403.3 | TGFBR1   | -0.49248632  | 0           |
| RP11-77403.3 | TGFBI    | -0.300476431 | 1.61E-10    |
| RP11-77403.3 | ERBB3    | -0.644876701 | 0           |
| RP11-77403.3 | CCL18    | -0.41072076  | 0           |

|              |           |              |             |
|--------------|-----------|--------------|-------------|
| RP11-77403.3 | CCL17     | -0.546586638 | 1.46E-35    |
| RP11-77403.3 | C16orf45  | -0.243608961 | 2.59E-07    |
| RP11-77403.3 | PRDM1     | -0.202279606 | 2.03E-05    |
| RP11-77403.3 | TRIM47    | -0.630370025 | 0           |
| RP11-77403.3 | CNFN      | -0.514442566 | 0           |
| RP11-77403.3 | ARMCX3    | -0.297524942 | 2.46E-10    |
| RP11-77403.3 | RAMP1     | -0.210784728 | 8.84E-06    |
| RP11-77403.3 | GABRD     | 0.0998132    | 0.036601748 |
| RP11-77403.3 | COL13A1   | -0.148091723 | 0.001881455 |
| RP11-77403.3 | S100A5    | -0.501496665 | 0           |
| RP11-77403.3 | MISP      | -0.507011151 | 0           |
| RP11-77403.3 | HES6      | -0.212421245 | 7.50E-06    |
| RP11-77403.3 | PSD3      | -0.547641107 | 0           |
| RP11-77403.3 | DOK7      | -0.449176777 | 0           |
| RP11-77403.3 | ZMAT3     | -0.594256873 | 0           |
| RP11-77403.3 | MFAP2     | -0.226368516 | 1.76E-06    |
| RP11-77403.3 | TMEM79    | -0.523950192 | 0           |
| RP11-77403.3 | SLC1A5    | -0.455310382 | 0           |
| RP11-77403.3 | BBC3      | -0.486745746 | 0           |
| RP11-77403.3 | HLA-DQB2  | -0.490947671 | 0           |
| RP11-77403.3 | C1QL1     | -0.247377431 | 1.67E-07    |
| RP11-77403.3 | TMEM215   | -0.063327125 | 0.185371151 |
| RP11-77403.3 | PNP       | -0.451337524 | 0           |
| RP11-77403.3 | ARNTL     | -0.369094682 | 1.33E-15    |
| RP11-77403.3 | CLDN2     | -0.263266462 | 2.15E-08    |
| RP11-77403.3 | MVP       | -0.660653387 | 0           |
| RP11-77403.3 | LGALS1    | -0.485916708 | 0           |
| RP11-77403.3 | BIRC7     | -0.489046691 | 8.93E-28    |
| RP11-77403.3 | COL8A1    | -0.577048483 | 0           |
| RP11-77403.3 | PERP      | -0.726811898 | 0           |
| RP11-77403.3 | GJA4      | -0.07047036  | 0.140399503 |
| RP11-77403.3 | IGFL2     | -0.536244975 | 4.74E-34    |
| RP11-77403.3 | DAPK2     | -0.359316572 | 1.01E-14    |
| RP11-77403.3 | MAMLD1    | -0.478571955 | 0           |
| RP11-77403.3 | ETV5      | -0.186054999 | 9.05E-05    |
| RP11-77403.3 | RUNX1     | -0.693602578 | 0           |
| RP11-77403.3 | LONRF2    | -0.197431897 | 3.21E-05    |
| RP11-77403.3 | SPOCK1    | -0.037097644 | 0.437993168 |
| RP11-77403.3 | XKRX      | -0.362287634 | 5.63E-15    |
| RP11-77403.3 | TGFB1     | -0.16510296  | 0.000522445 |
| RP11-77403.3 | ERP27     | -0.222424167 | 2.68E-06    |
| RP11-77403.3 | TNFRSF10C | -0.549514066 | 0           |
| RP11-77403.3 | PALM      | -0.415467055 | 0           |
| RP11-77403.3 | TSC22D1   | -0.169301055 | 0.000373466 |
| RP11-77403.3 | TGM2      | -0.600879532 | 0           |
| RP11-77403.3 | UBE2QL1   | -0.159987036 | 0.000778303 |
| RP11-77403.3 | ECE1      | -0.425122902 | 0           |
| RP11-77403.3 | COL8A2    | -0.521656402 | 0           |
| RP11-77403.3 | HIST3H2A  | -0.535704094 | 0           |
| RP11-77403.3 | TNFRSF21  | -0.552734904 | 0           |
| RP11-77403.3 | SOX4      | -0.497136592 | 0           |

|              |            |              |            |
|--------------|------------|--------------|------------|
| RP11-77403.3 | ELF3       | -0.687992919 | 0          |
| RP11-77403.3 | TPD52L1    | -0.505229819 | 0          |
| RP11-77403.3 | INHBB      | -0.215939515 | 5.25E-06   |
| RP11-77403.3 | HPN        | -0.450579688 | 0          |
| RP11-77403.3 | MMP7       | -0.555816142 | 5.88E-37   |
| RP11-77403.3 | RAB27A     | -0.551286321 | 0          |
| RP11-77403.3 | IGF2BP2    | -0.384606274 | 0          |
| RP11-77403.3 | ITGB4      | -0.519218222 | 0          |
| RP11-77403.3 | PPP1R1B    | -0.414429091 | 0          |
| RP11-77403.3 | NPDC1      | -0.223171223 | 2.48E-06   |
| RP11-77403.3 | CCL13      | -0.616775438 | 2.31E-47   |
| RP11-77403.3 | SPINT1     | -0.762971147 | 0          |
| RP11-77403.3 | HEY2       | -0.223686092 | 2.35E-06   |
| RP11-77403.3 | CST2       | -0.582109352 | 3.55E-41   |
| RP11-77403.3 | ADM        | -0.451321922 | 0          |
| RP11-77403.3 | VSTM2L     | -0.564885949 | 0          |
| RP11-77403.3 | FAM84A     | -0.506559684 | 0          |
| RP11-77403.3 | P4HA2      | -0.517437882 | 0          |
| RP11-77403.3 | LPL        | -0.26052162  | 3.42E-08   |
| RP11-77403.3 | TMEM173    | -0.463676787 | 0          |
| RP11-77403.3 | DHRS3      | -0.403650462 | 0          |
| RP11-77403.3 | SCN1B      | -0.610218656 | 0          |
| RP11-77403.3 | GLT1D1     | -0.214534193 | 6.06E-06   |
| RP11-77403.3 | PHYHIP     | -0.514331224 | 0          |
| RP11-77403.3 | BHLHE40    | -0.640488544 | 0          |
| RP11-77403.3 | BID        | -0.522377502 | 0          |
| RP11-77403.3 | POSTN      | -0.440513365 | 0          |
| RP11-77403.3 | ITGA3      | -0.763394106 | 0          |
| RP11-77403.3 | RSP04      | -0.409709319 | 0          |
| RP11-77403.3 | ADAMTS9    | -0.039294133 | 0.41134219 |
| RP11-77403.3 | ABTB2      | -0.605810925 | 0          |
| RP11-77403.3 | KCNQ3      | -0.65445709  | 0          |
| RP11-77403.3 | ANXA1      | -0.425838896 | 0          |
| RP11-77403.3 | S100A11    | -0.657102636 | 0          |
| RP11-77403.3 | CEACAM6    | -0.657307977 | 1.20E-55   |
| RP11-77403.3 | IER5L      | -0.475992647 | 0          |
| RP11-77403.3 | KRT80      | -0.704108738 | 0          |
| RP11-77403.3 | CDH6       | -0.552192377 | 0          |
| RP11-77403.3 | UNC5B      | -0.429151927 | 0          |
| RP11-77403.3 | PLEKHN1    | -0.553618549 | 0          |
| RP11-77403.3 | SYTL1      | -0.468178981 | 0          |
| RP11-77403.3 | TMEM163    | -0.444924358 | 0          |
| RP11-77403.3 | C4orf48    | -0.214745814 | 5.93E-06   |
| RP11-77403.3 | B3GNT7     | -0.323942959 | 4.61E-12   |
| RP11-77403.3 | BAIAP3     | -0.32554274  | 3.58E-12   |
| RP11-77403.3 | PHLDA2     | -0.587762292 | 0          |
| RP11-77403.3 | GAP43      | -0.416170942 | 8.12E-20   |
| RP11-77403.3 | S100A1     | -0.610437085 | 0          |
| RP11-77403.3 | PTPRE      | -0.638395595 | 0          |
| RP11-77403.3 | CCND1      | -0.484097646 | 0          |
| RP11-77403.3 | ST6GALNAC5 | -0.694982437 | 1.37E-64   |



|              |         |              |             |
|--------------|---------|--------------|-------------|
| RP11-77403.3 | KRT17   | -0.305770076 | 7.43E-11    |
| RP11-77403.3 | HPCAL4  | -0.263035967 | 2.50E-08    |
| RP11-77403.3 | GABBR2  | -0.260868979 | 3.28E-08    |
| RP11-77403.3 | DIRAS3  | -0.270014638 | 1.03E-08    |
| RP11-77403.3 | SERINC2 | -0.59571042  | 0           |
| RP11-77403.3 | PTCHD4  | -0.383627882 | 0           |
| RP11-77403.3 | EPS8    | -0.361358176 | 6.77E-15    |
| RP11-77403.3 | LY6E    | -0.533772839 | 0           |
| RP11-77403.3 | UPP1    | -0.651494538 | 0           |
| RP11-77403.3 | AHNAK2  | -0.711734895 | 0           |
| RP11-77403.3 | PLXNC1  | -0.373571913 | 4.57E-16    |
| RP11-77403.3 | TNC     | -0.590657046 | 0           |
| RP11-77403.3 | DUSP4   | -0.477482221 | 0           |
| RP11-77403.3 | NRCAM   | -0.377390878 | 1.54E-16    |
| RP11-77403.3 | NRP2    | -0.373911045 | 4.18E-16    |
| RP11-77403.3 | CTSC    | -0.653047229 | 0           |
| RP11-77403.3 | AMIG02  | -0.283854679 | 1.66E-09    |
| RP11-77403.3 | NAB2    | -0.349551511 | 6.24E-14    |
| RP11-77403.3 | TBC1D2  | -0.693505987 | 0           |
| RP11-77403.3 | PHLDA3  | -0.597012485 | 0           |
| RP11-77403.3 | PTP4A3  | -0.421522224 | 0           |
| RP11-77403.3 | CRABP2  | -0.366643453 | 2.28E-15    |
| RP11-77403.3 | GOS2    | -0.375902864 | 2.42E-16    |
| RP11-77403.3 | S100A6  | -0.722896626 | 0           |
| RP11-77403.3 | FOXQ1   | -0.519992653 | 0           |
| RP11-77403.3 | LRG1    | -0.48840836  | 0           |
| RP11-77403.3 | LAMP5   | -0.353167081 | 3.23E-14    |
| RP11-77403.3 | ALDH3B1 | -0.649502719 | 0           |
| RP11-77403.3 | CDH2    | 0.140417058  | 0.003219279 |
| RP11-77403.3 | SCG5    | -0.138241418 | 0.00373163  |
| RP11-77403.3 | ZCCHC16 | -0.180764719 | 0.000140062 |
| RP11-77403.3 | GRB7    | -0.545241648 | 0           |
| RP11-77403.3 | TIAM1   | -0.254435673 | 7.21E-08    |
| RP11-77403.3 | FXYS5   | -0.35196487  | 4.03E-14    |
| RP11-77403.3 | CLDN9   | -0.405461439 | 0           |
| RP11-77403.3 | FAM43A  | -0.487583152 | 0           |
| RP11-77403.3 | CHST2   | -0.371945325 | 6.86E-16    |
| RP11-77403.3 | HMGA2   | -0.392023222 | 0           |
| RP11-77403.3 | GALNT7  | -0.523483832 | 0           |
| RP11-77403.3 | CBLN1   | -0.507489001 | 0           |
| RP11-77403.3 | STRA6   | -0.476604249 | 0           |
| RP11-77403.3 | MUC21   | -0.699574243 | 8.92E-66    |
| RP11-77403.3 | PRR36   | -0.393490101 | 0           |
| RP11-77403.3 | NFE2L3  | -0.592316399 | 0           |
| RP11-77403.3 | NR1D1   | -0.468612578 | 0           |
| RP11-77403.3 | MUC1    | -0.733696531 | 0           |
| RP11-77403.3 | NAT8L   | -0.072129855 | 0.131275482 |
| RP11-77403.3 | APOC1   | -0.089788861 | 0.060165844 |
| RP11-77403.3 | EVA1A   | -0.593468258 | 0           |
| RP11-77403.3 | ENTPD1  | -0.190481452 | 6.09E-05    |
| RP11-77403.3 | COL1A1  | -0.462068921 | 0           |

|              |           |              |             |
|--------------|-----------|--------------|-------------|
| RP11-77403.3 | FNDC4     | -0.507897917 | 0           |
| RP11-77403.3 | FRMD3     | -0.089651137 | 0.060561357 |
| RP11-77403.3 | SHROOM4   | -0.409171047 | 0           |
| RP11-77403.3 | NELL2     | -0.192117969 | 5.25E-05    |
| RP11-77403.3 | EPHB3     | -0.627079829 | 0           |
| RP11-77403.3 | TMC6      | -0.612884201 | 0           |
| RP11-77403.3 | NOD1      | -0.32523935  | 3.75E-12    |
| RP11-77403.3 | GGCT      | -0.528899599 | 0           |
| RP11-77403.3 | ICAM1     | -0.638714161 | 0           |
| RP11-77403.3 | PRSS23    | -0.512558118 | 0           |
| RP11-77403.3 | CFI       | -0.467504688 | 0           |
| RP11-77403.3 | CD55      | -0.653564367 | 0           |
| RP11-77403.3 | RASD2     | -0.32841948  | 2.25E-12    |
| RP11-77403.3 | KLK11     | -0.31088045  | 2.72E-11    |
| RP11-77403.3 | ICAM5     | -0.3561224   | 1.86E-14    |
| RP11-77403.3 | ADORA1    | -0.578489832 | 0           |
| RP11-77403.3 | ITGA2     | -0.595488445 | 0           |
| RP11-77403.3 | ABCC3     | -0.314600147 | 1.97E-11    |
| RP11-77403.3 | MFGE8     | -0.555152092 | 0           |
| RP11-77403.3 | STK32A    | -0.31334191  | 2.39E-11    |
| RP11-77403.3 | CYSLTR2   | -0.22337717  | 2.42E-06    |
| RP11-77403.3 | LAD1      | -0.678767407 | 0           |
| RP11-77403.3 | MGAT3     | -0.504520491 | 0           |
| RP11-77403.3 | IGFBP6    | -0.409598544 | 0           |
| RP11-77403.3 | CYP2S1    | -0.643646831 | 0           |
| RP11-77403.3 | KCNJ2     | -0.417153783 | 0           |
| RP11-77403.3 | FAM20A    | -0.506819387 | 0           |
| RP11-77403.3 | TGFA      | -0.465580383 | 0           |
| RP11-77403.3 | MXRA8     | -0.424235427 | 0           |
| RP11-77403.3 | C8orf4    | -0.452994749 | 0           |
| RP11-77403.3 | CLDN10    | -0.513756064 | 6.14E-31    |
| RP11-77403.3 | PDE5A     | -0.480666606 | 0           |
| RP11-77403.3 | APOE      | -0.049954045 | 0.296211102 |
| RP11-77403.3 | SPOCK2    | -0.495441922 | 0           |
| RP11-77403.3 | TENM1     | -0.099987518 | 0.036273963 |
| RP11-77403.3 | SLIT1     | -0.154562191 | 0.001172953 |
| RP11-77403.3 | CXCL14    | -0.166461192 | 0.000469075 |
| RP11-77403.3 | ECM1      | -0.223679284 | 2.35E-06    |
| RP11-77403.3 | DUSP5     | -0.658388673 | 0           |
| RP11-77403.3 | SEZ6L2    | -0.4956873   | 0           |
| RP11-77403.3 | THRSP     | -0.292892683 | 4.75E-10    |
| RP11-77403.3 | C19orf33  | -0.610088166 | 0           |
| RP11-77403.3 | MPZL2     | -0.578442033 | 0           |
| RP11-77403.3 | CTSH      | -0.546756043 | 0           |
| RP11-77403.3 | CYP1B1    | -0.553326648 | 0           |
| RP11-77403.3 | ALOX5     | -0.702081602 | 0           |
| RP11-77403.3 | SYTL5     | -0.471880947 | 1.00E-25    |
| RP11-77403.3 | TNFRSF12A | -0.443235645 | 0           |
| RP11-77403.3 | DUSP6     | -0.421345637 | 0           |
| RP11-77403.3 | ALOX15B   | -0.67745286  | 0           |
| RP11-77403.3 | SDC4      | -0.473998701 | 0           |

|              |          |              |             |
|--------------|----------|--------------|-------------|
| RP11-77403.3 | MDK      | -0.361688514 | 6.34E-15    |
| RP11-77403.3 | KRT19    | -0.711175206 | 0           |
| RP11-77403.3 | MET      | -0.703706062 | 0           |
| RP11-77403.3 | TESC     | -0.100467921 | 0.035383507 |
| RP11-77403.3 | CXCL17   | -0.726037777 | 4.47E-73    |
| RP11-77403.3 | NPC2     | -0.412922072 | 0           |
| RP11-77403.3 | COMP     | -0.407829126 | 0           |
| RP11-77403.3 | TUSC3    | -0.343155649 | 1.93E-13    |
| RP11-77403.3 | TMPRSS4  | -0.682456733 | 0           |
| RP11-77403.3 | LGALS3   | -0.701973096 | 0           |
| RP11-77403.3 | CRLF1    | -0.35036906  | 5.38E-14    |
| RP11-77403.3 | CTXN1    | -0.420012794 | 0           |
| RP11-77403.3 | PCSK1N   | -0.186319951 | 8.84E-05    |
| RP11-77403.3 | NMU      | -0.523229876 | 3.20E-32    |
| RP11-77403.3 | GALE     | -0.541864364 | 0           |
| RP11-77403.3 | PCSK2    | -0.171476127 | 0.000312885 |
| RP11-77403.3 | GJB3     | -0.435849051 | 0           |
| RP11-77403.3 | SLPI     | -0.63044378  | 0           |
| RP11-77403.3 | AGR2     | -0.22756477  | 1.55E-06    |
| RP11-77403.3 | MRC2     | -0.405079613 | 0           |
| RP11-77403.3 | GOLT1A   | -0.406038149 | 0           |
| RP11-77403.3 | SLC27A6  | -0.4490924   | 3.55E-23    |
| RP11-77403.3 | KCNN4    | -0.662493015 | 0           |
| RP11-77403.3 | ETV4     | -0.267033443 | 1.33E-08    |
| RP11-77403.3 | SYT12    | -0.544978682 | 0           |
| RP11-77403.3 | PVRL4    | -0.704047181 | 0           |
| RP11-77403.3 | PLCD3    | -0.518217845 | 0           |
| RP11-77403.3 | PLAU     | -0.618405921 | 0           |
| RP11-77403.3 | LRRK2    | -0.192263494 | 5.18E-05    |
| RP11-77403.3 | SFN      | -0.693426274 | 0           |
| RP11-77403.3 | LPAR5    | -0.485118732 | 0           |
| RP11-77403.3 | NGEF     | -0.615786047 | 0           |
| RP11-77403.3 | DTX4     | -0.491063693 | 0           |
| RP11-77403.3 | CST6     | -0.485492331 | 0           |
| RP11-77403.3 | QPCT     | -0.40488246  | 0           |
| RP11-77403.3 | TIMP1    | -0.448896223 | 0           |
| RP11-77403.3 | CAMK2N1  | -0.456386642 | 0           |
| RP11-77403.3 | KLHDC8A  | -0.151716513 | 0.001447108 |
| RP11-77403.3 | PDLIM4   | -0.619464877 | 0           |
| RP11-77403.3 | SCEL     | -0.579620132 | 0           |
| RP11-77403.3 | LCN2     | -0.761433207 | 0           |
| RP11-77403.3 | PROS1    | -0.736092018 | 0           |
| RP11-77403.3 | GABRB2   | -0.55359004  | 0           |
| RP11-77403.3 | TMPRSS6  | -0.622445442 | 0           |
| RP11-77403.3 | KLK7     | -0.467453278 | 3.25E-25    |
| RP11-77403.3 | PDZK1IP1 | -0.655903971 | 0           |
| RP11-77403.3 | CDH3     | -0.40223124  | 0           |
| RP11-77403.3 | LRP4     | -0.198388021 | 2.94E-05    |
| RP11-77403.3 | IGSF1    | -0.259884913 | 3.70E-08    |
| RP11-77403.3 | B3GNT3   | -0.746651651 | 0           |
| RP11-77403.3 | CLDN1    | -0.589866446 | 0           |

|              |           |              |          |
|--------------|-----------|--------------|----------|
| RP11-77403.3 | GDF15     | -0.736328035 | 0        |
| RP11-77403.3 | ARHGAP36  | -0.268678824 | 1.07E-08 |
| RP11-77403.3 | LAMB3     | -0.601463476 | 0        |
| RP11-77403.3 | KLK10     | -0.489653123 | 0        |
| RP11-77403.3 | DPP4      | -0.659473728 | 0        |
| RP11-77403.3 | METTL7B   | -0.393853772 | 0        |
| RP11-77403.3 | LIPH      | -0.666236238 | 0        |
| RP11-77403.3 | CLDN16    | -0.568973269 | 0        |
| RP11-77403.3 | CHI3L1    | -0.671836394 | 0        |
| RP11-77403.3 | SLC22A31  | -0.479131389 | 1.41E-26 |
| RP11-77403.3 | TACSTD2   | -0.593424147 | 0        |
| RP11-77403.3 | SFTPB     | -0.629530916 | 0        |
| RP11-77403.3 | RXRG      | -0.257892527 | 4.73E-08 |
| RP11-77403.3 | DCSTAMP   | -0.643105244 | 1.33E-52 |
| RP11-77403.3 | CITED1    | -0.455042736 | 0        |
| RP11-77403.3 | SERPINA1  | -0.670579291 | 0        |
| RP11-77403.3 | PRR15     | -0.22592414  | 1.85E-06 |
| RP11-77403.3 | SLC34A2   | -0.759774564 | 0        |
| RP11-77403.3 | FN1       | -0.790506132 | 0        |
| RP11-77403.3 | ZCCHC12   | -0.19896005  | 2.78E-05 |
| CTB-51J22.1  | TFF3      | 0.638268084  | 0        |
| CTB-51J22.1  | CCL21     | 0.390665624  | 1.86E-17 |
| CTB-51J22.1  | TPO       | 0.679526377  | 0        |
| CTB-51J22.1  | MT1G      | 0.566801176  | 0        |
| CTB-51J22.1  | DIO1      | 0.578757195  | 0        |
| CTB-51J22.1  | DPT       | 0.375817824  | 3.56E-16 |
| CTB-51J22.1  | CDH16     | 0.637509822  | 0        |
| CTB-51J22.1  | CRABP1    | 0.584626688  | 1.34E-41 |
| CTB-51J22.1  | SLC26A7   | 0.622845281  | 0        |
| CTB-51J22.1  | MT1H      | 0.542940843  | 5.04E-35 |
| CTB-51J22.1  | SLC26A4   | 0.722488277  | 0        |
| CTB-51J22.1  | SLC5A8    | 0.607843347  | 1.07E-45 |
| CTB-51J22.1  | PKHD1L1   | 0.560309914  | 1.19E-37 |
| CTB-51J22.1  | TFCP2L1   | 0.553037442  | 0        |
| CTB-51J22.1  | WSCD2     | 0.643880176  | 9.18E-53 |
| CTB-51J22.1  | IPCEF1    | 0.637472235  | 0        |
| CTB-51J22.1  | SLC5A5    | 0.535481702  | 6.09E-34 |
| CTB-51J22.1  | MT1F      | 0.604049025  | 0        |
| CTB-51J22.1  | FOSB      | 0.382462406  | 1.15E-17 |
| CTB-51J22.1  | SEMA3D    | 0.571538272  | 1.96E-39 |
| CTB-51J22.1  | BMP8A     | 0.587205865  | 0        |
| CTB-51J22.1  | MATN2     | 0.585764233  | 0        |
| CTB-51J22.1  | PLA2R1    | 0.571613568  | 0        |
| CTB-51J22.1  | COL23A1   | 0.674608459  | 0        |
| CTB-51J22.1  | HGD       | 0.696087706  | 0        |
| CTB-51J22.1  | TCEAL2    | 0.543221745  | 0        |
| CTB-51J22.1  | CHRD1     | 0.341315254  | 1.94E-13 |
| CTB-51J22.1  | TNFRSF11B | 0.575768261  | 0        |
| CTB-51J22.1  | FAM167A   | 0.715319829  | 0        |
| CTB-51J22.1  | KIT       | 0.58617088   | 0        |
| CTB-51J22.1  | SLC4A4    | 0.629915153  | 0        |

|             |            |             |             |
|-------------|------------|-------------|-------------|
| CTB-51J22.1 | SMOC2      | 0.494164537 | 0           |
| CTB-51J22.1 | FHL1       | 0.708938009 | 0           |
| CTB-51J22.1 | OTOS       | 0.621668175 | 0           |
| CTB-51J22.1 | IGFBPL1    | 0.606992799 | 1.54E-45    |
| CTB-51J22.1 | HBB        | 0.363586437 | 4.33E-15    |
| CTB-51J22.1 | BEX1       | 0.508249815 | 0           |
| CTB-51J22.1 | FABP4      | 0.538536374 | 2.21E-34    |
| CTB-51J22.1 | LMOD1      | 0.618100687 | 0           |
| CTB-51J22.1 | SOD3       | 0.503168216 | 0           |
| CTB-51J22.1 | TMEM171    | 0.543832212 | 0           |
| CTB-51J22.1 | PI16       | 0.423476315 | 0           |
| CTB-51J22.1 | ZMAT4      | 0.613605009 | 9.16E-47    |
| CTB-51J22.1 | MFAP4      | 0.252530658 | 9.06E-08    |
| CTB-51J22.1 | CWH43      | 0.547202566 | 1.18E-35    |
| CTB-51J22.1 | SPX        | 0.634446282 | 0           |
| CTB-51J22.1 | APOD       | 0.2066984   | 1.32E-05    |
| CTB-51J22.1 | DPP6       | 0.577789156 | 0           |
| CTB-51J22.1 | MMRN1      | 0.409740523 | 0           |
| CTB-51J22.1 | WDR72      | 0.603159706 | 0           |
| CTB-51J22.1 | MPPED2     | 0.66190127  | 0           |
| CTB-51J22.1 | PAPSS2     | 0.480263789 | 0           |
| CTB-51J22.1 | DCN        | 0.210510273 | 9.08E-06    |
| CTB-51J22.1 | SORBS2     | 0.688030364 | 0           |
| CTB-51J22.1 | EGR2       | 0.442586882 | 0           |
| CTB-51J22.1 | EDN3       | 0.566093322 | 1.46E-38    |
| CTB-51J22.1 | DIO2       | 0.637730663 | 0           |
| CTB-51J22.1 | ITPR1      | 0.642068184 | 0           |
| CTB-51J22.1 | CFD        | 0.286951551 | 1.09E-09    |
| CTB-51J22.1 | CPXM1      | 0.384181614 | 0           |
| CTB-51J22.1 | ELMO1      | 0.665052749 | 0           |
| CTB-51J22.1 | GPC3       | 0.447591834 | 5.15E-23    |
| CTB-51J22.1 | MYOC       | 0.279833779 | 2.43E-09    |
| CTB-51J22.1 | DEPTOR     | 0.578856764 | 0           |
| CTB-51J22.1 | DGKI       | 0.589500223 | 0           |
| CTB-51J22.1 | CARTPT     | 0.639512599 | 7.41E-52    |
| CTB-51J22.1 | IYD        | 0.480505763 | 0           |
| CTB-51J22.1 | LYVE1      | 0.379812179 | 6.33E-17    |
| CTB-51J22.1 | CLCNKB     | 0.655442858 | 0           |
| CTB-51J22.1 | NCAM1      | 0.403447068 | 0           |
| CTB-51J22.1 | HBA2       | 0.30633317  | 6.84E-11    |
| CTB-51J22.1 | GLT8D2     | 0.572986409 | 0           |
| CTB-51J22.1 | OGDHL      | 0.455028977 | 0           |
| CTB-51J22.1 | LIFR       | 0.541731037 | 0           |
| CTB-51J22.1 | CSGALNACT1 | 0.551856932 | 0           |
| CTB-51J22.1 | RAP1GAP    | 0.54675732  | 0           |
| CTB-51J22.1 | COL9A3     | 0.576641552 | 0           |
| CTB-51J22.1 | FBLN1      | 0.183097553 | 0.000117264 |
| CTB-51J22.1 | EFEMP1     | 0.464409518 | 0           |
| CTB-51J22.1 | AOX1       | 0.511789237 | 1.12E-30    |
| CTB-51J22.1 | GRIN2C     | 0.636521217 | 0           |
| CTB-51J22.1 | C11orf74   | 0.599143162 | 0           |

|             |          |             |          |
|-------------|----------|-------------|----------|
| CTB-51J22.1 | PPARGC1A | 0.552889506 | 0        |
| CTB-51J22.1 | ANGPTL1  | 0.609245795 | 0        |
| CTB-51J22.1 | SCARA5   | 0.311015096 | 2.67E-11 |
| CTB-51J22.1 | LTF      | 0.524734977 | 0        |
| CTB-51J22.1 | CA4      | 0.600496005 | 2.31E-44 |
| CTB-51J22.1 | TG       | 0.651473404 | 0        |
| CTB-51J22.1 | FCGBP    | 0.562738393 | 0        |
| CTB-51J22.1 | PBX4     | 0.610680761 | 0        |
| CTB-51J22.1 | CYR61    | 0.409293453 | 0        |
| CTB-51J22.1 | FOS      | 0.41109138  | 0        |
| CTB-51J22.1 | KHDRBS2  | 0.588596295 | 0        |
| CTB-51J22.1 | MUM1L1   | 0.456711024 | 0        |
| CTB-51J22.1 | RGS16    | 0.616974784 | 0        |
| CTB-51J22.1 | MT1M     | 0.505029119 | 0        |
| CTB-51J22.1 | LRP2     | 0.589727588 | 0        |
| CTB-51J22.1 | MAFB     | 0.564224988 | 0        |
| CTB-51J22.1 | KCNK2    | 0.504655804 | 0        |
| CTB-51J22.1 | TBC1D4   | 0.573612336 | 0        |
| CTB-51J22.1 | MIOX     | 0.648424709 | 1.01E-53 |
| CTB-51J22.1 | TPPP     | 0.572228148 | 0        |
| CTB-51J22.1 | FMOD     | 0.521183943 | 0        |
| CTB-51J22.1 | CITED2   | 0.445926721 | 0        |
| CTB-51J22.1 | RGS8     | 0.62613869  | 3.62E-49 |
| CTB-51J22.1 | ABI3BP   | 0.333006635 | 1.07E-12 |
| CTB-51J22.1 | ADH1B    | 0.351383326 | 3.34E-14 |
| CTB-51J22.1 | OGN      | 0.242172621 | 2.80E-07 |
| CTB-51J22.1 | NR4A1    | 0.38821759  | 0        |
| CTB-51J22.1 | FOXJ1    | 0.624805608 | 6.60E-49 |
| CTB-51J22.1 | ALDH1A1  | 0.584230548 | 0        |
| CTB-51J22.1 | OCA2     | 0.473476023 | 6.54E-26 |
| CTB-51J22.1 | TMEM139  | 0.384359761 | 0        |
| CTB-51J22.1 | ARHGAP24 | 0.647735996 | 0        |
| CTB-51J22.1 | SLC25A15 | 0.571356275 | 0        |
| CTB-51J22.1 | DES      | 0.250143832 | 1.09E-07 |
| CTB-51J22.1 | GDF10    | 0.492541667 | 3.30E-28 |
| CTB-51J22.1 | KIAA1324 | 0.57273323  | 0        |
| CTB-51J22.1 | JUN      | 0.446016504 | 0        |
| CTB-51J22.1 | C7       | 0.196322305 | 3.56E-05 |
| CTB-51J22.1 | LGI3     | 0.604109022 | 0        |
| CTB-51J22.1 | CDON     | 0.654935507 | 0        |
| CTB-51J22.1 | BCL2     | 0.557870684 | 0        |
| CTB-51J22.1 | HLF      | 0.626783247 | 0        |
| CTB-51J22.1 | EGR1     | 0.418733139 | 0        |
| CTB-51J22.1 | IP6K3    | 0.489572843 | 0        |
| CTB-51J22.1 | SCUBE3   | 0.559209485 | 0        |
| CTB-51J22.1 | PKNOX2   | 0.551128314 | 0        |
| CTB-51J22.1 | SMAD9    | 0.445252995 | 0        |
| CTB-51J22.1 | IQGAP2   | 0.560691967 | 0        |
| CTB-51J22.1 | GNA14    | 0.641244394 | 0        |
| CTB-51J22.1 | LAYN     | 0.531788396 | 0        |
| CTB-51J22.1 | AVPR1A   | 0.625128859 | 0        |

|             |          |             |             |
|-------------|----------|-------------|-------------|
| CTB-51J22.1 | PDLIM3   | 0.456541103 | 0           |
| CTB-51J22.1 | GPM6A    | 0.517091658 | 0           |
| CTB-51J22.1 | SDPR     | 0.522292258 | 0           |
| CTB-51J22.1 | CRYAB    | 0.297608059 | 2.43E-10    |
| CTB-51J22.1 | FOXA2    | 0.5943667   | 2.81E-43    |
| CTB-51J22.1 | C8orf88  | 0.567333348 | 0           |
| CTB-51J22.1 | ISM1     | 0.508256623 | 0           |
| CTB-51J22.1 | BMP2     | 0.378006167 | 1.26E-16    |
| CTB-51J22.1 | ID4      | 0.550053189 | 0           |
| CTB-51J22.1 | NUPR1    | 0.358660717 | 1.15E-14    |
| CTB-51J22.1 | SERTM1   | 0.480384104 | 1.00E-26    |
| CTB-51J22.1 | IRS1     | 0.585134192 | 0           |
| CTB-51J22.1 | FIBIN    | 0.304549851 | 8.90E-11    |
| CTB-51J22.1 | PODN     | 0.236773688 | 5.64E-07    |
| CTB-51J22.1 | TDRD9    | 0.461793048 | 0           |
| CTB-51J22.1 | EPHA3    | 0.42266529  | 0           |
| CTB-51J22.1 | AIF1L    | 0.412969304 | 0           |
| CTB-51J22.1 | EBF4     | 0.563786427 | 0           |
| CTB-51J22.1 | ADM2     | 0.554575524 | 0           |
| CTB-51J22.1 | GSTM3    | 0.5477394   | 0           |
| CTB-51J22.1 | HSD17B6  | 0.438845502 | 0           |
| CTB-51J22.1 | AGR3     | 0.367903852 | 1.62E-15    |
| CTB-51J22.1 | EPHB1    | 0.437167286 | 0           |
| CTB-51J22.1 | TMOD1    | 0.47117983  | 0           |
| CTB-51J22.1 | WASF3    | 0.587435783 | 0           |
| CTB-51J22.1 | SELV     | 0.614577805 | 6.02E-47    |
| CTB-51J22.1 | ENPP1    | 0.401727434 | 0           |
| CTB-51J22.1 | SYNE1    | 0.679586328 | 8.97E-61    |
| CTB-51J22.1 | PLCH1    | 0.611196765 | 0           |
| CTB-51J22.1 | CCDC146  | 0.595016411 | 0           |
| CTB-51J22.1 | SLC16A2  | 0.660533109 | 0           |
| CTB-51J22.1 | IER2     | 0.491888334 | 0           |
| CTB-51J22.1 | KCNAB1   | 0.621456412 | 0           |
| CTB-51J22.1 | SYNDIG1  | 0.49405745  | 0           |
| CTB-51J22.1 | C16orf89 | 0.657217099 | 0           |
| CTB-51J22.1 | CTGF     | 0.286217544 | 1.20E-09    |
| CTB-51J22.1 | NR4A3    | 0.279562688 | 2.95E-09    |
| CTB-51J22.1 | KIAA1456 | 0.563167592 | 0           |
| CTB-51J22.1 | AQP4     | 0.570056196 | 0           |
| CTB-51J22.1 | RNF150   | 0.546325851 | 0           |
| CTB-51J22.1 | C1S      | 0.12859621  | 0.007010928 |
| CTB-51J22.1 | PFKFB2   | 0.48754826  | 0           |
| CTB-51J22.1 | PROX1    | 0.618991141 | 0           |
| CTB-51J22.1 | TCF7L1   | 0.624023522 | 0           |
| CTB-51J22.1 | HSPB6    | 0.316637779 | 1.44E-11    |
| CTB-51J22.1 | FHDC1    | 0.501584463 | 0           |
| CTB-51J22.1 | PRR15L   | 0.531831089 | 0           |
| CTB-51J22.1 | SLC1A1   | 0.540540456 | 0           |
| CTB-51J22.1 | BTBD11   | 0.653632307 | 0           |
| CTB-51J22.1 | TRIM58   | 0.534304019 | 0           |
| CTB-51J22.1 | LRIG1    | 0.520619289 | 0           |

|             |          |             |             |
|-------------|----------|-------------|-------------|
| CTB-51J22.1 | ROR2     | 0.412195157 | 0           |
| CTB-51J22.1 | GPR125   | 0.541083267 | 0           |
| CTB-51J22.1 | FLRT1    | 0.662134025 | 0           |
| CTB-51J22.1 | PGF      | 0.530580369 | 0           |
| CTB-51J22.1 | DUSP1    | 0.378218355 | 1.17E-16    |
| CTB-51J22.1 | PLA2G7   | 0.398260793 | 0           |
| CTB-51J22.1 | PLSCR4   | 0.492447031 | 0           |
| CTB-51J22.1 | FAM46B   | 0.339312288 | 3.72E-13    |
| CTB-51J22.1 | GLDC     | 0.436686174 | 0           |
| CTB-51J22.1 | ZBTB16   | 0.466245032 | 0           |
| CTB-51J22.1 | OMD      | 0.182336245 | 0.000122171 |
| CTB-51J22.1 | HSD11B2  | 0.575353529 | 0           |
| CTB-51J22.1 | FGL2     | 0.261486964 | 3.04E-08    |
| CTB-51J22.1 | CLCNKA   | 0.648587041 | 9.30E-54    |
| CTB-51J22.1 | GATM     | 0.531295228 | 0           |
| CTB-51J22.1 | TNS3     | 0.449871354 | 0           |
| CTB-51J22.1 | TOB1     | 0.453680674 | 0           |
| CTB-51J22.1 | MARC2    | 0.61265712  | 0           |
| CTB-51J22.1 | LRRC2    | 0.549199471 | 0           |
| CTB-51J22.1 | SORD     | 0.401953097 | 0           |
| CTB-51J22.1 | RIMS4    | 0.520121441 | 0           |
| CTB-51J22.1 | SLC29A4  | 0.569835639 | 0           |
| CTB-51J22.1 | SLC39A14 | 0.601830692 | 0           |
| CTB-51J22.1 | FAXDC2   | 0.584681873 | 0           |
| CTB-51J22.1 | HSPB8    | 0.319217797 | 9.68E-12    |
| CTB-51J22.1 | CCL19    | 0.084564326 | 0.076737265 |
| CTB-51J22.1 | KCNIP3   | 0.650556994 | 0           |
| CTB-51J22.1 | CGNL1    | 0.634015948 | 0           |
| CTB-51J22.1 | ATF3     | 0.182316314 | 0.0001255   |
| CTB-51J22.1 | SGCD     | 0.29448523  | 3.80E-10    |
| CTB-51J22.1 | STARD13  | 0.53292366  | 0           |
| CTB-51J22.1 | LDHD     | 0.652505127 | 0           |
| CTB-51J22.1 | RCAN1    | 0.398717509 | 0           |
| CTB-51J22.1 | ID3      | 0.428809674 | 0           |
| CTB-51J22.1 | SYTL3    | 0.581330829 | 0           |
| CTB-51J22.1 | MT1E     | 0.47454988  | 0           |
| CTB-51J22.1 | CAMK1D   | 0.611998003 | 0           |
| CTB-51J22.1 | PRKCQ    | 0.598006195 | 0           |
| CTB-51J22.1 | NUAK2    | 0.408987793 | 0           |
| CTB-51J22.1 | LIPG     | 0.552595903 | 0           |
| CTB-51J22.1 | SLC25A25 | 0.425333246 | 0           |
| CTB-51J22.1 | PRKX     | 0.327920781 | 2.44E-12    |
| CTB-51J22.1 | SRPX     | 0.252817027 | 8.76E-08    |
| CTB-51J22.1 | FAM189A1 | 0.535657571 | 0           |
| CTB-51J22.1 | PLEKHH1  | 0.505580724 | 0           |
| CTB-51J22.1 | WNT11    | 0.477117699 | 0           |
| CTB-51J22.1 | SNAI1    | 0.406001413 | 0           |
| CTB-51J22.1 | FDCSP    | 0.112019573 | 0.018886044 |
| CTB-51J22.1 | MT1X     | 0.412119274 | 0           |
| CTB-51J22.1 | ACACB    | 0.612381247 | 0           |
| CTB-51J22.1 | ARC      | 0.252546686 | 9.05E-08    |



|             |          |             |          |
|-------------|----------|-------------|----------|
| CTB-51J22.1 | KLK4     | 0.217173774 | 4.39E-06 |
| CTB-51J22.1 | ZFPM2    | 0.439077832 | 0        |
| CTB-51J22.1 | AKAP12   | 0.400386223 | 0        |
| CTB-51J22.1 | GJB6     | 0.50933253  | 2.36E-30 |
| CTB-51J22.1 | ERO1LB   | 0.593546411 | 0        |
| CTB-51J22.1 | DNALI1   | 0.596447831 | 0        |
| CTB-51J22.1 | HKDC1    | 0.464040032 | 0        |
| CTB-51J22.1 | ZFP36L2  | 0.455039899 | 0        |
| CTB-51J22.1 | CAPSL    | 0.605504103 | 2.88E-45 |
| CTB-51J22.1 | CYP7B1   | 0.55068947  | 0        |
| CTB-51J22.1 | CPQ      | 0.642329873 | 0        |
| CTB-51J22.1 | RPS6KA6  | 0.584940392 | 1.18E-41 |
| CTB-51J22.1 | TLE1     | 0.467229666 | 0        |
| CTB-51J22.1 | TP53INP2 | 0.640355926 | 0        |
| CTB-51J22.1 | KATNAL2  | 0.60390889  | 0        |
| CTB-51J22.1 | SGPP2    | 0.353733295 | 2.91E-14 |
| CTB-51J22.1 | CTH      | 0.511431505 | 0        |
| CTB-51J22.1 | KIF12    | 0.42444024  | 0        |
| CTB-51J22.1 | TMEM220  | 0.626618858 | 0        |
| CTB-51J22.1 | CENPJ    | 0.475743723 | 0        |
| CTB-51J22.1 | FAM155B  | 0.497441684 | 0        |
| CTB-51J22.1 | WFS1     | 0.591383252 | 0        |
| CTB-51J22.1 | SELENBP1 | 0.656293455 | 0        |
| CTB-51J22.1 | SNTA1    | 0.533827163 | 0        |
| CTB-51J22.1 | FRAS1    | 0.192227467 | 5.20E-05 |
| CTB-51J22.1 | FBLN7    | 0.516005469 | 0        |
| CTB-51J22.1 | AGPAT9   | 0.599789939 | 0        |
| CTB-51J22.1 | GPR83    | 0.530465056 | 0        |
| CTB-51J22.1 | PRTG     | 0.502828658 | 0        |
| CTB-51J22.1 | EGR3     | 0.279446239 | 3.00E-09 |
| CTB-51J22.1 | GRAMD2   | 0.365610453 | 2.84E-15 |
| CTB-51J22.1 | HYOU1    | 0.594629479 | 0        |
| CTB-51J22.1 | FBLN5    | 0.330938224 | 1.50E-12 |
| CTB-51J22.1 | ITM2A    | 0.583557247 | 0        |
| CTB-51J22.1 | SRF      | 0.434038642 | 0        |
| CTB-51J22.1 | FGFR2    | 0.372903009 | 5.41E-16 |
| CTB-51J22.1 | MT1A     | 0.325164968 | 2.86E-12 |
| CTB-51J22.1 | MAMDC2   | 0.337317207 | 5.21E-13 |
| CTB-51J22.1 | FHL2     | 0.33649285  | 5.98E-13 |
| CTB-51J22.1 | FTCDNL1  | 0.484948244 | 0        |
| CTB-51J22.1 | PKIA     | 0.466979039 | 0        |
| CTB-51J22.1 | DNAJB4   | 0.491029794 | 0        |
| CTB-51J22.1 | SLC25A33 | 0.593862565 | 0        |
| CTB-51J22.1 | EYA2     | 0.37855224  | 1.04E-16 |
| CTB-51J22.1 | LPAR1    | 0.287070836 | 1.07E-09 |
| CTB-51J22.1 | STX11    | 0.305810925 | 7.39E-11 |
| CTB-51J22.1 | ARHGEF28 | 0.47344355  | 0        |
| CTB-51J22.1 | OR2W3    | 0.556118003 | 0        |
| CTB-51J22.1 | ALDH1B1  | 0.415517564 | 9.39E-20 |
| CTB-51J22.1 | CXCL12   | 0.265998661 | 1.72E-08 |
| CTB-51J22.1 | OLFM2    | 0.528511249 | 0        |

|             |          |             |             |
|-------------|----------|-------------|-------------|
| CTB-51J22.1 | TUB      | 0.437445428 | 0           |
| CTB-51J22.1 | HTRA3    | 0.277661928 | 3.80E-09    |
| CTB-51J22.1 | CKB      | 0.486445193 | 0           |
| CTB-51J22.1 | RGS2     | 0.147918256 | 0.001904967 |
| CTB-51J22.1 | SHANK2   | 0.604354684 | 0           |
| CTB-51J22.1 | CNTFR    | 0.528296424 | 6.34E-33    |
| CTB-51J22.1 | CYTH3    | 0.594039862 | 0           |
| CTB-51J22.1 | PLAC9    | 0.374053734 | 4.03E-16    |
| CTB-51J22.1 | WWOX     | 0.622123898 | 0           |
| CTB-51J22.1 | NPR3     | 0.462020981 | 0           |
| CTB-51J22.1 | SDC2     | 0.481489403 | 0           |
| CTB-51J22.1 | KLF15    | 0.504688285 | 0           |
| CTB-51J22.1 | TMEM164  | 0.564666952 | 0           |
| CTB-51J22.1 | LONRF3   | 0.399791925 | 0           |
| CTB-51J22.1 | GBP1     | 0.255415484 | 6.40E-08    |
| CTB-51J22.1 | ARHGAP6  | 0.498884025 | 0           |
| CTB-51J22.1 | TMEM119  | 0.149878162 | 0.001654327 |
| CTB-51J22.1 | SH3RF1   | 0.511753192 | 0           |
| CTB-51J22.1 | CRELD2   | 0.586486609 | 0           |
| CTB-51J22.1 | PCP4     | 0.136129889 | 0.004298471 |
| CTB-51J22.1 | GCSH     | 0.634008998 | 0           |
| CTB-51J22.1 | IMPA2    | 0.545015418 | 0           |
| CTB-51J22.1 | C1R      | 0.115994264 | 0.015071656 |
| CTB-51J22.1 | SUCNR1   | 0.424810718 | 0           |
| CTB-51J22.1 | SFRP1    | 0.449956882 | 0           |
| CTB-51J22.1 | UGT8     | 0.468991566 | 0           |
| CTB-51J22.1 | TLE4     | 0.318823489 | 1.03E-11    |
| CTB-51J22.1 | ANTXR1   | 0.405635331 | 0           |
| CTB-51J22.1 | GPX3     | 0.448116687 | 0           |
| CTB-51J22.1 | DPY19L2  | 0.574903054 | 0           |
| CTB-51J22.1 | FAM46C   | 0.553644505 | 0           |
| CTB-51J22.1 | IL33     | 0.279684181 | 2.48E-09    |
| CTB-51J22.1 | PEG3     | 0.5587227   | 0           |
| CTB-51J22.1 | FAHD2A   | 0.592147187 | 0           |
| CTB-51J22.1 | PTGDS    | 0.11869385  | 0.012863532 |
| CTB-51J22.1 | CHCHD10  | 0.365343515 | 3.01E-15    |
| CTB-51J22.1 | CD36     | 0.512245934 | 0           |
| CTB-51J22.1 | ANKRD37  | 0.522255948 | 0           |
| CTB-51J22.1 | TSPAN33  | 0.491463958 | 0           |
| CTB-51J22.1 | PRDM16   | 0.564093363 | 0           |
| CTB-51J22.1 | UST      | 0.659474579 | 0           |
| CTB-51J22.1 | NEXN     | 0.486619794 | 0           |
| CTB-51J22.1 | NUPR1L   | 0.290450776 | 5.56E-10    |
| CTB-51J22.1 | SLC24A3  | 0.453335442 | 0           |
| CTB-51J22.1 | MARC1    | 0.57445726  | 0           |
| CTB-51J22.1 | MYH11    | 0.285524953 | 1.32E-09    |
| CTB-51J22.1 | APOA1    | 0.533508687 | 1.17E-33    |
| CTB-51J22.1 | TMEM178B | 0.505040466 | 0           |
| CTB-51J22.1 | CAPN6    | 0.269190046 | 1.00E-08    |
| CTB-51J22.1 | PPM1L    | 0.604290431 | 0           |
| CTB-51J22.1 | FZD8     | 0.564958853 | 0           |

|             |          |             |             |
|-------------|----------|-------------|-------------|
| CTB-51J22.1 | RCAN2    | 0.596008845 | 0           |
| CTB-51J22.1 | COPZ2    | 0.530211025 | 0           |
| CTB-51J22.1 | GAS1     | 0.275790387 | 4.87E-09    |
| CTB-51J22.1 | DACT1    | 0.398857218 | 0           |
| CTB-51J22.1 | WBSCR17  | 0.62905718  | 0           |
| CTB-51J22.1 | NCS1     | 0.401268024 | 0           |
| CTB-51J22.1 | SPIRE2   | 0.444307792 | 0           |
| CTB-51J22.1 | C15orf52 | 0.371927737 | 6.89E-16    |
| CTB-51J22.1 | SPAG5    | 0.472286159 | 0           |
| CTB-51J22.1 | ARL4D    | 0.524516832 | 0           |
| CTB-51J22.1 | FAM189A2 | 0.538935427 | 0           |
| CTB-51J22.1 | MAP1LC3A | 0.591568066 | 0           |
| CTB-51J22.1 | KLF6     | 0.130177126 | 0.006339434 |
| CTB-51J22.1 | ADD3     | 0.494416865 | 0           |
| CTB-51J22.1 | TSPAN7   | 0.479559567 | 0           |
| CTB-51J22.1 | KLF9     | 0.43974475  | 0           |
| CTB-51J22.1 | KCNQ1    | 0.636561074 | 0           |
| CTB-51J22.1 | MAN1A1   | 0.236479517 | 5.83E-07    |
| CTB-51J22.1 | MLF1     | 0.354597792 | 2.48E-14    |
| CTB-51J22.1 | RARB     | 0.568051186 | 0           |
| CTB-51J22.1 | CDC42EP2 | 0.554143346 | 0           |
| CTB-51J22.1 | FAM3B    | 0.233340236 | 8.26E-07    |
| CTB-51J22.1 | GADD45B  | 0.263152415 | 2.47E-08    |
| CTB-51J22.1 | TMEM47   | 0.520611488 | 0           |
| CTB-51J22.1 | SDF2L1   | 0.516706996 | 0           |
| CTB-51J22.1 | CCDC85A  | 0.39702142  | 0           |
| CTB-51J22.1 | CRYBG3   | 0.231270549 | 1.04E-06    |
| CTB-51J22.1 | FBLN2    | 0.134229697 | 0.004873958 |
| CTB-51J22.1 | PEBP4    | 0.379430921 | 7.42E-17    |
| CTB-51J22.1 | CDADC1   | 0.635390066 | 0           |
| CTB-51J22.1 | FAM63A   | 0.58370107  | 0           |
| CTB-51J22.1 | GLUL     | 0.407368013 | 0           |
| CTB-51J22.1 | FREM2    | 0.419264177 | 0           |
| CTB-51J22.1 | ACKR3    | 0.471092316 | 0           |
| CTB-51J22.1 | DENND6A  | 0.581333383 | 0           |
| CTB-51J22.1 | CLDN8    | 0.162271181 | 0.000652343 |
| CTB-51J22.1 | UTS2R    | 0.162199084 | 0.000646362 |
| CTB-51J22.1 | SCNN1B   | 0.384349549 | 0           |
| CTB-51J22.1 | TTC30A   | 0.551826295 | 0           |
| CTB-51J22.1 | CORO2B   | 0.619771671 | 0           |
| CTB-51J22.1 | TC2N     | 0.315387343 | 1.75E-11    |
| CTB-51J22.1 | ALDH2    | 0.565503508 | 0           |
| CTB-51J22.1 | GPR183   | 0.14377718  | 0.002552572 |
| CTB-51J22.1 | C4orf47  | 0.569621891 | 0           |
| CTB-51J22.1 | SLC25A42 | 0.645453553 | 0           |
| CTB-51J22.1 | LGMN     | 0.563854793 | 0           |
| CTB-51J22.1 | ACSF2    | 0.55044622  | 0           |
| CTB-51J22.1 | KIAA1467 | 0.531264733 | 0           |
| CTB-51J22.1 | PRKG1    | 0.583394843 | 0           |
| CTB-51J22.1 | GNAI1    | 0.595772544 | 0           |
| CTB-51J22.1 | ABCC4    | 0.424560092 | 0           |

|             |          |              |             |
|-------------|----------|--------------|-------------|
| CTB-51J22.1 | PRPS1    | 0.645949983  | 0           |
| CTB-51J22.1 | TSPAN5   | 0.358688659  | 1.14E-14    |
| CTB-51J22.1 | CR2      | 0.224110642  | 2.11E-06    |
| CTB-51J22.1 | CCDC170  | 0.501262209  | 0           |
| CTB-51J22.1 | RRAD     | 0.069438779  | 0.146311693 |
| CTB-51J22.1 | SCGB2A1  | 0.490819875  | 0           |
| CTB-51J22.1 | SESN3    | 0.337385431  | 5.15E-13    |
| CTB-51J22.1 | SGK223   | 0.32151882   | 6.76E-12    |
| CTB-51J22.1 | NDRG2    | 0.634374512  | 0           |
| CTB-51J22.1 | C3orf52  | 0.388871175  | 0           |
| CTB-51J22.1 | FLRT3    | -0.241609341 | 3.26E-07    |
| CTB-51J22.1 | MST1R    | -0.438957412 | 0           |
| CTB-51J22.1 | SDC1     | -0.366571967 | 2.32E-15    |
| CTB-51J22.1 | ST8SIA4  | -0.495425611 | 0           |
| CTB-51J22.1 | UBTD1    | -0.311484978 | 3.17E-11    |
| CTB-51J22.1 | EPHA2    | -0.399534632 | 0           |
| CTB-51J22.1 | TMEM130  | -0.273931328 | 6.22E-09    |
| CTB-51J22.1 | SPINK2   | -0.361913894 | 6.06E-15    |
| CTB-51J22.1 | MMP16    | -0.486612561 | 0           |
| CTB-51J22.1 | SIGLEC15 | -0.462573153 | 0           |
| CTB-51J22.1 | RIN1     | -0.470287958 | 0           |
| CTB-51J22.1 | IL1RN    | -0.439395405 | 0           |
| CTB-51J22.1 | FCER1G   | -0.245646026 | 2.04E-07    |
| CTB-51J22.1 | CD276    | -0.505267547 | 0           |
| CTB-51J22.1 | CTSB     | -0.334530959 | 8.29E-13    |
| CTB-51J22.1 | FAM171A2 | -0.131096798 | 0.005975919 |
| CTB-51J22.1 | ASPHD1   | -0.486408315 | 0           |
| CTB-51J22.1 | C15orf48 | -0.3081684   | 5.21E-11    |
| CTB-51J22.1 | DYSF     | -0.065199551 | 0.172615135 |
| CTB-51J22.1 | PDZRN4   | -0.061908362 | 0.195354606 |
| CTB-51J22.1 | EFHD2    | -0.09956768  | 0.037067689 |
| CTB-51J22.1 | ASF1B    | -0.362892286 | 4.98E-15    |
| CTB-51J22.1 | AQP1     | -0.092649716 | 0.05242139  |
| CTB-51J22.1 | ARRDC2   | -0.425021772 | 0           |
| CTB-51J22.1 | PRSS1    | -0.264286888 | 1.89E-08    |
| CTB-51J22.1 | MAPK13   | -0.384898601 | 0           |
| CTB-51J22.1 | CST5     | -0.545938596 | 1.82E-35    |
| CTB-51J22.1 | AHR      | -0.496091394 | 0           |
| CTB-51J22.1 | BAX      | -0.446570094 | 0           |
| CTB-51J22.1 | C1orf115 | -0.241455306 | 3.32E-07    |
| CTB-51J22.1 | PLK3     | -0.360301915 | 8.35E-15    |
| CTB-51J22.1 | JAG2     | -0.273933456 | 6.21E-09    |
| CTB-51J22.1 | RAD23B   | -0.379562688 | 7.03E-17    |
| CTB-51J22.1 | CA12     | 0.155965953  | 0.001056137 |
| CTB-51J22.1 | ADTRP    | -0.294658981 | 3.71E-10    |
| CTB-51J22.1 | UCP2     | -0.318299827 | 1.12E-11    |
| CTB-51J22.1 | IGFBP2   | -0.348907287 | 7.00E-14    |
| CTB-51J22.1 | LOXL2    | -0.271570307 | 8.45E-09    |
| CTB-51J22.1 | GPX1     | -0.380665046 | 4.24E-17    |
| CTB-51J22.1 | P3H3     | -0.422375091 | 0           |
| CTB-51J22.1 | C2orf81  | -0.339747019 | 3.45E-13    |

|             |          |              |             |
|-------------|----------|--------------|-------------|
| CTB-51J22.1 | CDT1     | -0.432045405 | 0           |
| CTB-51J22.1 | SNX25    | -0.22536133  | 1.96E-06    |
| CTB-51J22.1 | MTHFD1L  | -0.522349135 | 0           |
| CTB-51J22.1 | CDC42BPG | -0.535464692 | 6.13E-34    |
| CTB-51J22.1 | MSN      | -0.487836473 | 0           |
| CTB-51J22.1 | SIGLEC6  | -0.384829561 | 6.04E-17    |
| CTB-51J22.1 | F2R      | -0.195404477 | 3.88E-05    |
| CTB-51J22.1 | TMEM184A | -0.573890054 | 0           |
| CTB-51J22.1 | CKS2     | -0.307710834 | 5.57E-11    |
| CTB-51J22.1 | TAX1BP3  | -0.52938298  | 0           |
| CTB-51J22.1 | PMEPA1   | -0.447017165 | 0           |
| CTB-51J22.1 | CXCL16   | -0.498411708 | 0           |
| CTB-51J22.1 | FAXC     | -0.567909916 | 0           |
| CTB-51J22.1 | VTCN1    | -0.586402387 | 6.67E-42    |
| CTB-51J22.1 | SH2D4A   | -0.462037008 | 0           |
| CTB-51J22.1 | RNF24    | -0.420550073 | 0           |
| CTB-51J22.1 | LY6G6C   | -0.517517707 | 1.92E-31    |
| CTB-51J22.1 | NID1     | -0.339125063 | 3.84E-13    |
| CTB-51J22.1 | STAC     | -0.560663032 | 0           |
| CTB-51J22.1 | RAB34    | -0.421450171 | 0           |
| CTB-51J22.1 | HES4     | -0.325790246 | 3.44E-12    |
| CTB-51J22.1 | EPHA10   | -0.477274997 | 0           |
| CTB-51J22.1 | ENTPD2   | -0.38303018  | 4.60E-18    |
| CTB-51J22.1 | DDB2     | -0.518254297 | 0           |
| CTB-51J22.1 | NKAIN4   | -0.365653004 | 2.82E-15    |
| CTB-51J22.1 | TRIM29   | -0.523852609 | 0           |
| CTB-51J22.1 | ADCY8    | -0.427686842 | 5.97E-21    |
| CTB-51J22.1 | SFTA2    | -0.376538578 | 2.01E-16    |
| CTB-51J22.1 | NRIP1    | -0.426891044 | 0           |
| CTB-51J22.1 | VWA1     | -0.068884054 | 0.149568515 |
| CTB-51J22.1 | APLNR    | -0.090614495 | 0.057839347 |
| CTB-51J22.1 | REN      | -0.390603142 | 1.88E-17    |
| CTB-51J22.1 | EDIL3    | -0.232156322 | 9.41E-07    |
| CTB-51J22.1 | AGRN     | -0.413870395 | 0           |
| CTB-51J22.1 | TREM1    | -0.297862514 | 2.35E-10    |
| CTB-51J22.1 | SRL      | -0.195667159 | 3.79E-05    |
| CTB-51J22.1 | RASGRF1  | -0.450287929 | 0           |
| CTB-51J22.1 | RMI2     | -0.392724039 | 0           |
| CTB-51J22.1 | SAMD1    | -0.482116465 | 0           |
| CTB-51J22.1 | MGAT4B   | -0.575633516 | 0           |
| CTB-51J22.1 | NXN      | -0.543049839 | 0           |
| CTB-51J22.1 | SH3BGR13 | -0.438765506 | 0           |
| CTB-51J22.1 | CA11     | -0.209245086 | 1.03E-05    |
| CTB-51J22.1 | PLD3     | -0.22061163  | 3.24E-06    |
| CTB-51J22.1 | LURAP1L  | -0.425957046 | 0           |
| CTB-51J22.1 | CARNS1   | -0.209703787 | 9.84E-06    |
| CTB-51J22.1 | PDLIM7   | -0.378227007 | 1.17E-16    |
| CTB-51J22.1 | BCL2L1   | -0.548730132 | 0           |
| CTB-51J22.1 | GGT6     | -0.37747598  | 1.50E-16    |
| CTB-51J22.1 | DPYSL3   | -0.270857576 | 9.27E-09    |
| CTB-51J22.1 | FYN      | -0.472266302 | 0           |

|             |          |              |             |
|-------------|----------|--------------|-------------|
| CTB-51J22.1 | TK1      | -0.311444129 | 3.19E-11    |
| CTB-51J22.1 | AK1      | -0.158735182 | 0.000856544 |
| CTB-51J22.1 | HIGD1B   | -0.012015733 | 0.801699144 |
| CTB-51J22.1 | TMEM59L  | -0.350581249 | 5.18E-14    |
| CTB-51J22.1 | MEGF9    | -0.343421594 | 1.84E-13    |
| CTB-51J22.1 | ZFP36L1  | -0.401623751 | 0           |
| CTB-51J22.1 | ADRA1B   | -0.233237404 | 8.35E-07    |
| CTB-51J22.1 | EPHA4    | -0.413707708 | 0           |
| CTB-51J22.1 | TCERG1L  | -0.100864923 | 0.034661744 |
| CTB-51J22.1 | NGFR     | -0.211177475 | 8.50E-06    |
| CTB-51J22.1 | EBI3     | -0.412676835 | 0           |
| CTB-51J22.1 | S100A10  | -0.472262614 | 0           |
| CTB-51J22.1 | S100B    | -0.328119069 | 2.37E-12    |
| CTB-51J22.1 | CD44     | -0.141711605 | 0.002945635 |
| CTB-51J22.1 | BHLHE41  | -0.392663474 | 0           |
| CTB-51J22.1 | FBXO2    | -0.29196677  | 5.41E-10    |
| CTB-51J22.1 | SLC30A2  | -0.412376424 | 0           |
| CTB-51J22.1 | FRMD5    | -0.482062709 | 0           |
| CTB-51J22.1 | SAMD11   | -0.295893957 | 3.11E-10    |
| CTB-51J22.1 | SIPA1L2  | -0.429515598 | 0           |
| CTB-51J22.1 | S100A16  | -0.484651804 | 0           |
| CTB-51J22.1 | PPL      | -0.56133307  | 0           |
| CTB-51J22.1 | ARHGD1B  | -0.169877056 | 0.000356438 |
| CTB-51J22.1 | CDC42EP3 | -0.537011548 | 0           |
| CTB-51J22.1 | RUNX2    | -0.407960042 | 0           |
| CTB-51J22.1 | LAMC2    | -0.520108108 | 0           |
| CTB-51J22.1 | BRINP1   | -0.401265329 | 0           |
| CTB-51J22.1 | GPRC5B   | -0.39254575  | 0           |
| CTB-51J22.1 | AQP5     | -0.137359617 | 0.003959554 |
| CTB-51J22.1 | PLAG1    | -0.336621496 | 5.85E-13    |
| CTB-51J22.1 | PTPRU    | -0.564748083 | 0           |
| CTB-51J22.1 | ANGPTL4  | -0.294549625 | 3.76E-10    |
| CTB-51J22.1 | PALM3    | -0.349444991 | 6.36E-14    |
| CTB-51J22.1 | ACP5     | -0.31091536  | 3.45E-11    |
| CTB-51J22.1 | DLG4     | -0.240719029 | 3.61E-07    |
| CTB-51J22.1 | ETNK2    | -0.383145636 | 3.34E-18    |
| CTB-51J22.1 | CD109    | -0.491514452 | 0           |
| CTB-51J22.1 | SNX22    | -0.193368263 | 4.68E-05    |
| CTB-51J22.1 | TMEM98   | -0.420900552 | 0           |
| CTB-51J22.1 | CTHRC1   | -0.374885041 | 3.23E-16    |
| CTB-51J22.1 | S100A2   | -0.455409668 | 0           |
| CTB-51J22.1 | C11orf80 | -0.560251846 | 0           |
| CTB-51J22.1 | SREBF1   | -0.436631992 | 0           |
| CTB-51J22.1 | PRSS22   | -0.554376385 | 0           |
| CTB-51J22.1 | CMTM3    | -0.468870721 | 0           |
| CTB-51J22.1 | RDH5     | -0.312007648 | 2.93E-11    |
| CTB-51J22.1 | MYH10    | -0.392594116 | 0           |
| CTB-51J22.1 | EVPL     | -0.503944491 | 0           |
| CTB-51J22.1 | SCD      | -0.469709262 | 0           |
| CTB-51J22.1 | CD151    | -0.40895588  | 0           |
| CTB-51J22.1 | S100A4   | -0.444695008 | 0           |

|             |          |              |             |
|-------------|----------|--------------|-------------|
| CTB-51J22.1 | BNIP1    | -0.30120363  | 1.45E-10    |
| CTB-51J22.1 | MAP3K6   | -0.50116037  | 0           |
| CTB-51J22.1 | MANEAL   | -0.379199727 | 8.14E-17    |
| CTB-51J22.1 | CD207    | -0.363097782 | 3.97E-15    |
| CTB-51J22.1 | CD1A     | -0.373921125 | 5.14E-16    |
| CTB-51J22.1 | C3       | -0.368894408 | 1.39E-15    |
| CTB-51J22.1 | NT5E     | -0.395565037 | 0           |
| CTB-51J22.1 | CACNG4   | -0.498781973 | 5.44E-29    |
| CTB-51J22.1 | FHOD1    | -0.444481259 | 0           |
| CTB-51J22.1 | LEMD1    | -0.483069611 | 0           |
| CTB-51J22.1 | ATP11A   | -0.195174984 | 3.96E-05    |
| CTB-51J22.1 | PPAP2C   | -0.379699986 | 6.64E-17    |
| CTB-51J22.1 | DRAM1    | -0.504928131 | 0           |
| CTB-51J22.1 | CDA      | -0.204738353 | 1.60E-05    |
| CTB-51J22.1 | CCND2    | -0.213031003 | 7.06E-06    |
| CTB-51J22.1 | LCN6     | -0.1577024   | 0.000914526 |
| CTB-51J22.1 | CDH4     | -0.384349124 | 0           |
| CTB-51J22.1 | MMP11    | -0.493252382 | 0           |
| CTB-51J22.1 | B3GAT1   | -0.420441567 | 0           |
| CTB-51J22.1 | SPP1     | -0.263185605 | 2.46E-08    |
| CTB-51J22.1 | HLA-DQB1 | -0.282373474 | 2.03E-09    |
| CTB-51J22.1 | SDC3     | -0.436354701 | 0           |
| CTB-51J22.1 | CX3CL1   | -0.298715239 | 2.08E-10    |
| CTB-51J22.1 | SDK1     | -0.387893917 | 0           |
| CTB-51J22.1 | DOCK9    | -0.442753257 | 0           |
| CTB-51J22.1 | CSF2     | -0.458782466 | 3.09E-24    |
| CTB-51J22.1 | GRHL3    | -0.529577297 | 0           |
| CTB-51J22.1 | TMEM92   | -0.501795994 | 2.24E-29    |
| CTB-51J22.1 | BASP1    | -0.551388727 | 0           |
| CTB-51J22.1 | HRH1     | -0.514936443 | 0           |
| CTB-51J22.1 | ESM1     | -0.090888666 | 0.057083471 |
| CTB-51J22.1 | B4GALNT3 | -0.444562532 | 0           |
| CTB-51J22.1 | LMO3     | -0.188661965 | 7.17E-05    |
| CTB-51J22.1 | C9orf16  | -0.504188734 | 0           |
| CTB-51J22.1 | SEMA3F   | -0.274513002 | 5.76E-09    |
| CTB-51J22.1 | PLA2G12B | -0.235111847 | 6.29E-07    |
| CTB-51J22.1 | KLK6     | -0.463836713 | 8.38E-25    |
| CTB-51J22.1 | ST3GAL5  | -0.324305636 | 4.35E-12    |
| CTB-51J22.1 | FAM132B  | -0.138550765 | 0.003654534 |
| CTB-51J22.1 | CDKN1A   | -0.274319253 | 5.91E-09    |
| CTB-51J22.1 | E2F1     | -0.414100738 | 0           |
| CTB-51J22.1 | B3GNT8   | -0.381565003 | 2.50E-17    |
| CTB-51J22.1 | MTMR11   | -0.473183137 | 0           |
| CTB-51J22.1 | MYO1G    | -0.454174692 | 0           |
| CTB-51J22.1 | TMSB10   | -0.466075395 | 0           |
| CTB-51J22.1 | UNC5CL   | -0.485569916 | 0           |
| CTB-51J22.1 | ABR      | -0.446698883 | 0           |
| CTB-51J22.1 | PLP2     | -0.419548986 | 0           |
| CTB-51J22.1 | SRCIN1   | -0.412357844 | 0           |
| CTB-51J22.1 | PDE9A    | -0.554914657 | 0           |
| CTB-51J22.1 | TREM2    | -0.287002329 | 1.08E-09    |

|             |          |              |             |
|-------------|----------|--------------|-------------|
| CTB-51J22.1 | KDELR3   | -0.311746242 | 3.04E-11    |
| CTB-51J22.1 | PC       | -0.35509791  | 2.26E-14    |
| CTB-51J22.1 | C2CD4A   | -0.489998497 | 0           |
| CTB-51J22.1 | PELI1    | -0.463433537 | 0           |
| CTB-51J22.1 | SSX1     | -0.409615281 | 0           |
| CTB-51J22.1 | MROH6    | -0.548989269 | 0           |
| CTB-51J22.1 | ESPN     | -0.457604598 | 0           |
| CTB-51J22.1 | BMP1     | -0.338570055 | 4.22E-13    |
| CTB-51J22.1 | TM4SF4   | -0.421507772 | 2.45E-20    |
| CTB-51J22.1 | CORO2A   | -0.460118945 | 0           |
| CTB-51J22.1 | CD164L2  | -0.34637657  | 8.07E-14    |
| CTB-51J22.1 | CTSS     | -0.349261454 | 6.57E-14    |
| CTB-51J22.1 | CLU      | -0.367832331 | 1.76E-15    |
| CTB-51J22.1 | TMSB4X   | -0.445521493 | 0           |
| CTB-51J22.1 | WNT10A   | -0.487022203 | 1.58E-27    |
| CTB-51J22.1 | NAPSA    | -0.313501193 | 2.33E-11    |
| CTB-51J22.1 | PLEKHA4  | -0.413401481 | 0           |
| CTB-51J22.1 | SFTPA1   | -0.015185468 | 0.751029597 |
| CTB-51J22.1 | C1orf116 | -0.486054006 | 0           |
| CTB-51J22.1 | TM4SF1   | -0.419186025 | 0           |
| CTB-51J22.1 | SEL1L3   | -0.430843619 | 0           |
| CTB-51J22.1 | VASN     | -0.442161513 | 0           |
| CTB-51J22.1 | NPTXR    | -0.441332475 | 0           |
| CTB-51J22.1 | PDE4C    | -0.583543489 | 0           |
| CTB-51J22.1 | CDC42EP1 | -0.467636313 | 0           |
| CTB-51J22.1 | ENDOD1   | -0.479102001 | 0           |
| CTB-51J22.1 | RYR1     | -0.418474003 | 0           |
| CTB-51J22.1 | IL1RAP   | -0.434990937 | 0           |
| CTB-51J22.1 | SLC35F2  | -0.521015246 | 6.43E-32    |
| CTB-51J22.1 | ISYNA1   | -0.344500265 | 1.52E-13    |
| CTB-51J22.1 | HLA-G    | -0.427861493 | 0           |
| CTB-51J22.1 | CDKN2B   | -0.515554569 | 0           |
| CTB-51J22.1 | ALDH1A3  | -0.467746095 | 0           |
| CTB-51J22.1 | CLIP3    | -0.442689289 | 0           |
| CTB-51J22.1 | ULBP2    | -0.346538039 | 1.07E-13    |
| CTB-51J22.1 | ETHE1    | -0.49489287  | 0           |
| CTB-51J22.1 | XPR1     | -0.453223107 | 0           |
| CTB-51J22.1 | SPTBN2   | -0.606711591 | 0           |
| CTB-51J22.1 | IVL      | -0.537388543 | 3.24E-34    |
| CTB-51J22.1 | MARCO    | -0.354822462 | 2.38E-14    |
| CTB-51J22.1 | PLXND1   | -0.282318441 | 2.04E-09    |
| CTB-51J22.1 | EMILIN2  | -0.405839718 | 0           |
| CTB-51J22.1 | PLAUR    | -0.440053387 | 0           |
| CTB-51J22.1 | CDC42EP5 | -0.520799139 | 0           |
| CTB-51J22.1 | TRPC5    | -0.201240827 | 2.16E-05    |
| CTB-51J22.1 | TMEM100  | -0.28508072  | 1.40E-09    |
| CTB-51J22.1 | QSOX1    | -0.541324957 | 0           |
| CTB-51J22.1 | ARHGAP23 | -0.462770873 | 0           |
| CTB-51J22.1 | MDF1     | -0.360472119 | 8.07E-15    |
| CTB-51J22.1 | FSTL3    | -0.551415535 | 0           |
| CTB-51J22.1 | INF2     | -0.45051189  | 0           |



|             |           |              |             |
|-------------|-----------|--------------|-------------|
| CTB-51J22.1 | TGFBR1    | -0.485873447 | 0           |
| CTB-51J22.1 | TGFBI     | -0.309841228 | 4.06E-11    |
| CTB-51J22.1 | ERBB3     | -0.586096699 | 0           |
| CTB-51J22.1 | CCL18     | -0.307741329 | 5.55E-11    |
| CTB-51J22.1 | CCL17     | -0.390699044 | 1.85E-17    |
| CTB-51J22.1 | C16orf45  | -0.266452965 | 1.63E-08    |
| CTB-51J22.1 | PRDM1     | -0.224259397 | 2.21E-06    |
| CTB-51J22.1 | TRIM47    | -0.511191517 | 0           |
| CTB-51J22.1 | CNFN      | -0.433405907 | 0           |
| CTB-51J22.1 | ARMCX3    | -0.273948632 | 6.20E-09    |
| CTB-51J22.1 | RAMP1     | -0.255539165 | 6.31E-08    |
| CTB-51J22.1 | GABRD     | -0.067886513 | 0.155563517 |
| CTB-51J22.1 | COL13A1   | -0.15204983  | 0.001412196 |
| CTB-51J22.1 | S100A5    | -0.436035283 | 0           |
| CTB-51J22.1 | MISP      | -0.485836995 | 0           |
| CTB-51J22.1 | HES6      | -0.249245568 | 1.34E-07    |
| CTB-51J22.1 | PSD3      | -0.407459073 | 0           |
| CTB-51J22.1 | DOK7      | -0.544561539 | 0           |
| CTB-51J22.1 | ZMAT3     | -0.57963772  | 0           |
| CTB-51J22.1 | MFAP2     | -0.360163907 | 8.57E-15    |
| CTB-51J22.1 | TMEM79    | -0.513806994 | 0           |
| CTB-51J22.1 | SLC1A5    | -0.382880542 | 6.31E-18    |
| CTB-51J22.1 | BBC3      | -0.495837789 | 0           |
| CTB-51J22.1 | HLA-DQB2  | -0.324344216 | 4.33E-12    |
| CTB-51J22.1 | C1QL1     | -0.382632043 | 9.31E-18    |
| CTB-51J22.1 | TMEM215   | -0.062465453 | 0.191436596 |
| CTB-51J22.1 | PNP       | -0.429287524 | 0           |
| CTB-51J22.1 | ARNTL     | -0.365798954 | 2.73E-15    |
| CTB-51J22.1 | CLDN2     | -0.197875996 | 2.97E-05    |
| CTB-51J22.1 | MVP       | -0.492909562 | 0           |
| CTB-51J22.1 | LGALS1    | -0.396293796 | 0           |
| CTB-51J22.1 | BIRC7     | -0.488898471 | 9.31E-28    |
| CTB-51J22.1 | COL8A1    | -0.37667304  | 1.93E-16    |
| CTB-51J22.1 | PERP      | -0.608791207 | 0           |
| CTB-51J22.1 | GJA4      | -0.248181932 | 1.52E-07    |
| CTB-51J22.1 | IGFL2     | -0.438386437 | 4.82E-22    |
| CTB-51J22.1 | DAPK2     | -0.39749927  | 0           |
| CTB-51J22.1 | MAMLD1    | -0.425661741 | 0           |
| CTB-51J22.1 | ETV5      | -0.231366289 | 1.03E-06    |
| CTB-51J22.1 | RUNX1     | -0.627991132 | 0           |
| CTB-51J22.1 | LONRF2    | -0.203810313 | 1.75E-05    |
| CTB-51J22.1 | SPOCK1    | -0.181469121 | 0.000135043 |
| CTB-51J22.1 | XKRX      | -0.407044483 | 0           |
| CTB-51J22.1 | TGFB1     | -0.243734487 | 2.55E-07    |
| CTB-51J22.1 | ERP27     | -0.260682464 | 3.36E-08    |
| CTB-51J22.1 | TNFRSF10C | -0.400515436 | 0           |
| CTB-51J22.1 | PALM      | -0.550990023 | 0           |
| CTB-51J22.1 | TSC22D1   | -0.255291376 | 6.50E-08    |
| CTB-51J22.1 | TGM2      | -0.463946845 | 0           |
| CTB-51J22.1 | UBE2QL1   | -0.247851309 | 1.58E-07    |
| CTB-51J22.1 | ECE1      | -0.435045828 | 0           |

|             |          |              |             |
|-------------|----------|--------------|-------------|
| CTB-51J22.1 | COL8A2   | -0.451961608 | 0           |
| CTB-51J22.1 | HIST3H2A | -0.457256955 | 0           |
| CTB-51J22.1 | TNFRSF21 | -0.457012286 | 0           |
| CTB-51J22.1 | SOX4     | -0.583657526 | 0           |
| CTB-51J22.1 | ELF3     | -0.593743422 | 0           |
| CTB-51J22.1 | TPD52L1  | -0.410527577 | 0           |
| CTB-51J22.1 | INHBB    | -0.319050145 | 9.94E-12    |
| CTB-51J22.1 | HPN      | -0.389165771 | 0           |
| CTB-51J22.1 | MMP7     | -0.442853281 | 1.64E-22    |
| CTB-51J22.1 | RAB27A   | -0.374549313 | 3.53E-16    |
| CTB-51J22.1 | IGF2BP2  | -0.497014612 | 0           |
| CTB-51J22.1 | ITGB4    | -0.518351739 | 0           |
| CTB-51J22.1 | PPP1R1B  | -0.477350738 | 0           |
| CTB-51J22.1 | NPDC1    | -0.312302385 | 2.80E-11    |
| CTB-51J22.1 | CCL13    | -0.409628688 | 3.42E-19    |
| CTB-51J22.1 | SPINT1   | -0.558165989 | 0           |
| CTB-51J22.1 | HEY2     | -0.261729789 | 2.95E-08    |
| CTB-51J22.1 | CST2     | -0.515433044 | 3.66E-31    |
| CTB-51J22.1 | ADM      | -0.300420263 | 1.62E-10    |
| CTB-51J22.1 | VSTM2L   | -0.47923476  | 0           |
| CTB-51J22.1 | FAM84A   | -0.444277014 | 0           |
| CTB-51J22.1 | P4HA2    | -0.365385641 | 2.98E-15    |
| CTB-51J22.1 | LPL      | -0.331348701 | 1.40E-12    |
| CTB-51J22.1 | TMEM173  | -0.417086268 | 0           |
| CTB-51J22.1 | DHRS3    | -0.456742228 | 0           |
| CTB-51J22.1 | SCN1B    | -0.423850197 | 0           |
| CTB-51J22.1 | GLT1D1   | -0.205435766 | 1.50E-05    |
| CTB-51J22.1 | PHYHIP   | -0.366681891 | 2.26E-15    |
| CTB-51J22.1 | BHLHE40  | -0.449421446 | 0           |
| CTB-51J22.1 | BID      | -0.504699064 | 0           |
| CTB-51J22.1 | POSTN    | -0.337264302 | 5.25E-13    |
| CTB-51J22.1 | ITGA3    | -0.543294224 | 0           |
| CTB-51J22.1 | RSP04    | -0.411391366 | 0           |
| CTB-51J22.1 | ADAMTS9  | -0.115922495 | 0.015134648 |
| CTB-51J22.1 | ABTB2    | -0.507879904 | 0           |
| CTB-51J22.1 | KCNQ3    | -0.568309046 | 0           |
| CTB-51J22.1 | ANXA1    | -0.359674427 | 9.44E-15    |
| CTB-51J22.1 | S100A11  | -0.554181642 | 0           |
| CTB-51J22.1 | CEACAM6  | -0.512729937 | 8.40E-31    |
| CTB-51J22.1 | IER5L    | -0.49117773  | 0           |
| CTB-51J22.1 | KRT80    | -0.552098906 | 0           |
| CTB-51J22.1 | CDH6     | -0.505899857 | 0           |
| CTB-51J22.1 | UNC5B    | -0.419336372 | 0           |
| CTB-51J22.1 | PLEKHN1  | -0.517947929 | 0           |
| CTB-51J22.1 | SYTL1    | -0.415732291 | 0           |
| CTB-51J22.1 | TMEM163  | -0.44251029  | 0           |
| CTB-51J22.1 | C4orf48  | -0.249481585 | 1.30E-07    |
| CTB-51J22.1 | B3GNT7   | -0.301139094 | 1.46E-10    |
| CTB-51J22.1 | BAIAP3   | -0.455546257 | 0           |
| CTB-51J22.1 | PHLDA2   | -0.392292712 | 0           |
| CTB-51J22.1 | GAP43    | -0.397177579 | 4.86E-18    |

|             |            |              |             |
|-------------|------------|--------------|-------------|
| CTB-51J22.1 | S100A1     | -0.476337453 | 0           |
| CTB-51J22.1 | PTPRE      | -0.52022484  | 0           |
| CTB-51J22.1 | CCND1      | -0.484757047 | 0           |
| CTB-51J22.1 | ST6GALNAC5 | -0.581306704 | 4.84E-41    |
| CTB-51J22.1 | KRT17      | -0.331372246 | 1.39E-12    |
| CTB-51J22.1 | HPCAL4     | -0.282582826 | 1.97E-09    |
| CTB-51J22.1 | GABBR2     | -0.194296729 | 4.30E-05    |
| CTB-51J22.1 | DIRAS3     | -0.250252612 | 1.19E-07    |
| CTB-51J22.1 | SERINC2    | -0.464958286 | 0           |
| CTB-51J22.1 | PTCHD4     | -0.435940394 | 0           |
| CTB-51J22.1 | EPS8       | -0.323982673 | 4.58E-12    |
| CTB-51J22.1 | LY6E       | -0.462940085 | 0           |
| CTB-51J22.1 | UPP1       | -0.532160293 | 0           |
| CTB-51J22.1 | AHNAK2     | -0.580604907 | 0           |
| CTB-51J22.1 | PLXNC1     | -0.322775639 | 5.55E-12    |
| CTB-51J22.1 | TNC        | -0.431860024 | 0           |
| CTB-51J22.1 | DUSP4      | -0.397264955 | 0           |
| CTB-51J22.1 | NRCAM      | -0.441374175 | 0           |
| CTB-51J22.1 | NRP2       | -0.330929714 | 1.50E-12    |
| CTB-51J22.1 | CTSC       | -0.432925788 | 0           |
| CTB-51J22.1 | AMIG02     | -0.318654561 | 1.06E-11    |
| CTB-51J22.1 | NAB2       | -0.354989263 | 2.31E-14    |
| CTB-51J22.1 | TBC1D2     | -0.562791298 | 0           |
| CTB-51J22.1 | PHLDA3     | -0.547615576 | 0           |
| CTB-51J22.1 | PTP4A3     | -0.354514534 | 2.52E-14    |
| CTB-51J22.1 | CRABP2     | -0.298565885 | 2.12E-10    |
| CTB-51J22.1 | GOS2       | -0.250091485 | 1.21E-07    |
| CTB-51J22.1 | S100A6     | -0.567514049 | 0           |
| CTB-51J22.1 | FOXQ1      | -0.457952666 | 0           |
| CTB-51J22.1 | LRG1       | -0.400413739 | 0           |
| CTB-51J22.1 | LAMP5      | -0.374626614 | 3.46E-16    |
| CTB-51J22.1 | ALDH3B1    | -0.567548657 | 0           |
| CTB-51J22.1 | CDH2       | -0.066473815 | 0.164362386 |
| CTB-51J22.1 | SCG5       | -0.149439034 | 0.001707697 |
| CTB-51J22.1 | ZCCHC16    | -0.179198658 | 0.000160316 |
| CTB-51J22.1 | GRB7       | -0.544055606 | 0           |
| CTB-51J22.1 | TIAM1      | -0.338160429 | 4.52E-13    |
| CTB-51J22.1 | FXYD5      | -0.328564296 | 2.20E-12    |
| CTB-51J22.1 | CLDN9      | -0.423153068 | 0           |
| CTB-51J22.1 | FAM43A     | -0.488975709 | 0           |
| CTB-51J22.1 | CHST2      | -0.420099598 | 0           |
| CTB-51J22.1 | HMGA2      | -0.37601832  | 2.34E-16    |
| CTB-51J22.1 | GALNT7     | -0.402470945 | 0           |
| CTB-51J22.1 | CBLN1      | -0.370047118 | 1.07E-15    |
| CTB-51J22.1 | STRA6      | -0.516501757 | 0           |
| CTB-51J22.1 | MUC21      | -0.528081505 | 6.79E-33    |
| CTB-51J22.1 | PRR36      | -0.496639453 | 0           |
| CTB-51J22.1 | NFE2L3     | -0.502759583 | 0           |
| CTB-51J22.1 | NR1D1      | -0.421727888 | 0           |
| CTB-51J22.1 | MUC1       | -0.5802106   | 0           |
| CTB-51J22.1 | NAT8L      | -0.201197389 | 2.25E-05    |

|             |          |              |             |
|-------------|----------|--------------|-------------|
| CTB-51J22.1 | APOC1    | -0.230573419 | 1.12E-06    |
| CTB-51J22.1 | EVA1A    | -0.560577646 | 0           |
| CTB-51J22.1 | ENTPD1   | -0.233001387 | 8.57E-07    |
| CTB-51J22.1 | COL1A1   | -0.385832456 | 0           |
| CTB-51J22.1 | FNDC4    | -0.382173058 | 1.55E-17    |
| CTB-51J22.1 | FRMD3    | -0.089739644 | 0.06030694  |
| CTB-51J22.1 | SHROOM4  | -0.406121832 | 0           |
| CTB-51J22.1 | NELL2    | -0.29315494  | 4.58E-10    |
| CTB-51J22.1 | EPHB3    | -0.647672169 | 0           |
| CTB-51J22.1 | TMC6     | -0.548086617 | 0           |
| CTB-51J22.1 | NOD1     | -0.413521901 | 0           |
| CTB-51J22.1 | GGCT     | -0.452856883 | 0           |
| CTB-51J22.1 | ICAM1    | -0.448487307 | 0           |
| CTB-51J22.1 | PRSS23   | -0.359758253 | 9.28E-15    |
| CTB-51J22.1 | CFI      | -0.438724657 | 0           |
| CTB-51J22.1 | CD55     | -0.55814287  | 0           |
| CTB-51J22.1 | RASD2    | -0.457670694 | 0           |
| CTB-51J22.1 | KLK11    | -0.398423194 | 3.74E-18    |
| CTB-51J22.1 | ICAM5    | -0.428488271 | 0           |
| CTB-51J22.1 | ADORA1   | -0.388738983 | 0           |
| CTB-51J22.1 | ITGA2    | -0.509767047 | 0           |
| CTB-51J22.1 | ABCC3    | -0.374010899 | 4.08E-16    |
| CTB-51J22.1 | MFGE8    | -0.409021976 | 0           |
| CTB-51J22.1 | STK32A   | -0.226627652 | 1.72E-06    |
| CTB-51J22.1 | CYSLTR2  | -0.316676926 | 1.43E-11    |
| CTB-51J22.1 | LAD1     | -0.592646738 | 0           |
| CTB-51J22.1 | MGAT3    | -0.574121957 | 0           |
| CTB-51J22.1 | IGFBP6   | -0.314817583 | 1.91E-11    |
| CTB-51J22.1 | CYP2S1   | -0.577259678 | 0           |
| CTB-51J22.1 | KCNJ2    | -0.376363551 | 2.12E-16    |
| CTB-51J22.1 | FAM20A   | -0.417800418 | 0           |
| CTB-51J22.1 | TGFA     | -0.359981079 | 8.89E-15    |
| CTB-51J22.1 | MXRA8    | -0.470499437 | 0           |
| CTB-51J22.1 | C8orf4   | -0.305954323 | 7.23E-11    |
| CTB-51J22.1 | CLDN10   | -0.396554282 | 5.53E-18    |
| CTB-51J22.1 | PDE5A    | -0.449716326 | 0           |
| CTB-51J22.1 | APOE     | -0.205710505 | 1.46E-05    |
| CTB-51J22.1 | SPOCK2   | -0.548357668 | 0           |
| CTB-51J22.1 | TENM1    | -0.165223379 | 0.000517494 |
| CTB-51J22.1 | SLIT1    | -0.129303693 | 0.006702922 |
| CTB-51J22.1 | CXCL14   | -0.299048273 | 1.98E-10    |
| CTB-51J22.1 | ECM1     | -0.13773123  | 0.003862006 |
| CTB-51J22.1 | DUSP5    | -0.520952748 | 0           |
| CTB-51J22.1 | SEZ6L2   | -0.432433188 | 0           |
| CTB-51J22.1 | THRSP    | -0.202112948 | 2.06E-05    |
| CTB-51J22.1 | C19orf33 | -0.590091542 | 0           |
| CTB-51J22.1 | MPZL2    | -0.407067319 | 0           |
| CTB-51J22.1 | CTSH     | -0.467803397 | 0           |
| CTB-51J22.1 | CYP1B1   | -0.472141485 | 0           |
| CTB-51J22.1 | ALOX5    | -0.506669466 | 0           |
| CTB-51J22.1 | SYTL5    | -0.478525946 | 1.66E-26    |

|             |           |              |             |
|-------------|-----------|--------------|-------------|
| CTB-51J22.1 | TNFRSF12A | -0.419732807 | 0           |
| CTB-51J22.1 | DUSP6     | -0.390799451 | 0           |
| CTB-51J22.1 | ALOX15B   | -0.493043598 | 0           |
| CTB-51J22.1 | SDC4      | -0.468824057 | 0           |
| CTB-51J22.1 | MDK       | -0.420079173 | 0           |
| CTB-51J22.1 | KRT19     | -0.616413109 | 0           |
| CTB-51J22.1 | MET       | -0.548894805 | 0           |
| CTB-51J22.1 | TESC      | -0.194924075 | 4.06E-05    |
| CTB-51J22.1 | CXCL17    | -0.501174287 | 2.70E-29    |
| CTB-51J22.1 | NPC2      | -0.32157981  | 6.70E-12    |
| CTB-51J22.1 | COMP      | -0.417637305 | 0           |
| CTB-51J22.1 | TUSC3     | -0.373365398 | 4.82E-16    |
| CTB-51J22.1 | TMPRSS4   | -0.599222874 | 0           |
| CTB-51J22.1 | LGALS3    | -0.570741553 | 0           |
| CTB-51J22.1 | CRLF1     | -0.403387071 | 0           |
| CTB-51J22.1 | CTXN1     | -0.503354874 | 0           |
| CTB-51J22.1 | PCSK1N    | -0.296815898 | 2.73E-10    |
| CTB-51J22.1 | NMU       | -0.528401117 | 6.13E-33    |
| CTB-51J22.1 | GALE      | -0.489737091 | 0           |
| CTB-51J22.1 | PCSK2     | -0.081360899 | 0.088627582 |
| CTB-51J22.1 | GJB3      | -0.493932633 | 0           |
| CTB-51J22.1 | SLPI      | -0.521522224 | 0           |
| CTB-51J22.1 | AGR2      | -0.298009174 | 2.30E-10    |
| CTB-51J22.1 | MRC2      | -0.415165226 | 0           |
| CTB-51J22.1 | GOLT1A    | -0.374270744 | 3.81E-16    |
| CTB-51J22.1 | SLC27A6   | -0.475553749 | 3.73E-26    |
| CTB-51J22.1 | KCNN4     | -0.517153783 | 0           |
| CTB-51J22.1 | ETV4      | -0.428877842 | 4.53E-21    |
| CTB-51J22.1 | SYT12     | -0.501453831 | 0           |
| CTB-51J22.1 | PVRL4     | -0.58958575  | 0           |
| CTB-51J22.1 | PLCD3     | -0.559304516 | 0           |
| CTB-51J22.1 | PLAU      | -0.442605889 | 0           |
| CTB-51J22.1 | LRRK2     | -0.169265738 | 0.000374535 |
| CTB-51J22.1 | SFN       | -0.541367225 | 0           |
| CTB-51J22.1 | LPAR5     | -0.480396123 | 0           |
| CTB-51J22.1 | NGEF      | -0.604393689 | 0           |
| CTB-51J22.1 | DTX4      | -0.502703983 | 0           |
| CTB-51J22.1 | CST6      | -0.458071242 | 0           |
| CTB-51J22.1 | QPCT      | -0.343748812 | 1.74E-13    |
| CTB-51J22.1 | TIMP1     | -0.408088121 | 0           |
| CTB-51J22.1 | CAMK2N1   | -0.439479373 | 0           |
| CTB-51J22.1 | KLHDC8A   | -0.160740475 | 0.000734459 |
| CTB-51J22.1 | PDLIM4    | -0.538972447 | 0           |
| CTB-51J22.1 | SCEL      | -0.453231334 | 0           |
| CTB-51J22.1 | LCN2      | -0.577060539 | 0           |
| CTB-51J22.1 | PROS1     | -0.577465626 | 0           |
| CTB-51J22.1 | GABRB2    | -0.435336736 | 0           |
| CTB-51J22.1 | TMPRSS6   | -0.575969244 | 0           |
| CTB-51J22.1 | KLK7      | -0.452818777 | 1.40E-23    |
| CTB-51J22.1 | PDZK1IP1  | -0.4834625   | 0           |
| CTB-51J22.1 | CDH3      | -0.437387275 | 0           |

|                |          |              |             |
|----------------|----------|--------------|-------------|
| CTB-51J22. 1   | LRP4     | -0.286280378 | 1.19E-09    |
| CTB-51J22. 1   | IGSF1    | -0.271247911 | 8.81E-09    |
| CTB-51J22. 1   | B3GNT3   | -0.602379176 | 0           |
| CTB-51J22. 1   | CLDN1    | -0.507158946 | 0           |
| CTB-51J22. 1   | GDF15    | -0.547946057 | 0           |
| CTB-51J22. 1   | ARHGAP36 | -0.207332585 | 1.19E-05    |
| CTB-51J22. 1   | LAMB3    | -0.492778079 | 0           |
| CTB-51J22. 1   | KLK10    | -0.452840856 | 0           |
| CTB-51J22. 1   | DPP4     | -0.473194626 | 0           |
| CTB-51J22. 1   | METTL7B  | -0.387393516 | 0           |
| CTB-51J22. 1   | LIPH     | -0.531207715 | 0           |
| CTB-51J22. 1   | CLDN16   | -0.546428541 | 0           |
| CTB-51J22. 1   | CHI3L1   | -0.412890158 | 0           |
| CTB-51J22. 1   | SLC22A31 | -0.440374663 | 2.99E-22    |
| CTB-51J22. 1   | TACSTD2  | -0.559082257 | 0           |
| CTB-51J22. 1   | SFTPB    | -0.439780351 | 0           |
| CTB-51J22. 1   | RXRG     | -0.268534425 | 1.25E-08    |
| CTB-51J22. 1   | DCSTAMP  | -0.530978598 | 2.66E-33    |
| CTB-51J22. 1   | CITED1   | -0.291853301 | 5.50E-10    |
| CTB-51J22. 1   | SERPINA1 | -0.519596076 | 0           |
| CTB-51J22. 1   | PRR15    | -0.342518375 | 2.15E-13    |
| CTB-51J22. 1   | SLC34A2  | -0.588864225 | 0           |
| CTB-51J22. 1   | FN1      | -0.609749884 | 0           |
| CTB-51J22. 1   | ZCCHC12  | -0.249380455 | 1.32E-07    |
| RP11-701H24. 3 | TFF3     | 0.30958738   | 3.32E-11    |
| RP11-701H24. 3 | CCL21    | 0.181958305  | 0.000126266 |
| RP11-701H24. 3 | TPO      | 0.361047528  | 5.80E-15    |
| RP11-701H24. 3 | MT1G     | 0.264729636  | 1.78E-08    |
| RP11-701H24. 3 | DI01     | 0.343169307  | 1.41E-13    |
| RP11-701H24. 3 | DPT      | 0.1765145    | 0.000201545 |
| RP11-701H24. 3 | CDH16    | 0.355757123  | 1.52E-14    |
| RP11-701H24. 3 | CRABP1   | 0.350419592  | 3.96E-14    |
| RP11-701H24. 3 | SLC26A7  | 0.576224875  | 3.37E-40    |
| RP11-701H24. 3 | MT1H     | 0.236428503  | 5.42E-07    |
| RP11-701H24. 3 | SLC26A4  | 0.45262109   | 1.47E-23    |
| RP11-701H24. 3 | SLC5A8   | 0.420364045  | 3.18E-20    |
| RP11-701H24. 3 | PKHD1L1  | 0.471334974  | 1.16E-25    |
| RP11-701H24. 3 | TFCP2L1  | 0.529144676  | 4.82E-33    |
| RP11-701H24. 3 | WSCD2    | 0.43474948   | 1.15E-21    |
| RP11-701H24. 3 | IPCEF1   | 0.454148967  | 1.00E-23    |
| RP11-701H24. 3 | SLC5A5   | 0.279768747  | 2.45E-09    |
| RP11-701H24. 3 | MT1F     | 0.213974988  | 6.10E-06    |
| RP11-701H24. 3 | FOSB     | 0.376668685  | 3.02E-16    |
| RP11-701H24. 3 | SEMA3D   | 0.497726146  | 7.40E-29    |
| RP11-701H24. 3 | BMP8A    | 0.479397076  | 1.31E-26    |
| RP11-701H24. 3 | MATN2    | 0.525116201  | 1.76E-32    |
| RP11-701H24. 3 | PLA2R1   | 0.528662711  | 5.63E-33    |
| RP11-701H24. 3 | COL23A1  | 0.344656476  | 1.09E-13    |
| RP11-701H24. 3 | HGD      | 0.337783019  | 3.54E-13    |
| RP11-701H24. 3 | TCEAL2   | 0.281615844  | 1.91E-09    |
| RP11-701H24. 3 | CHRD1    | 0.337746863  | 3.56E-13    |

|               |            |             |             |
|---------------|------------|-------------|-------------|
| RP11-701H24.3 | TNFRSF11B  | 0.477167245 | 2.41E-26    |
| RP11-701H24.3 | FAM167A    | 0.435494751 | 9.61E-22    |
| RP11-701H24.3 | KIT        | 0.497585354 | 7.71E-29    |
| RP11-701H24.3 | SLC4A4     | 0.561876995 | 6.76E-38    |
| RP11-701H24.3 | SMOC2      | 0.29514376  | 2.84E-10    |
| RP11-701H24.3 | FHL1       | 0.481194302 | 8.00E-27    |
| RP11-701H24.3 | OTOS       | 0.124932237 | 0.00878185  |
| RP11-701H24.3 | IGFBPL1    | 0.524874158 | 1.90E-32    |
| RP11-701H24.3 | HBB        | 0.237166593 | 4.98E-07    |
| RP11-701H24.3 | BEX1       | 0.282914368 | 1.59E-09    |
| RP11-701H24.3 | FABP4      | 0.341278092 | 1.95E-13    |
| RP11-701H24.3 | LMOD1      | 0.421875634 | 2.26E-20    |
| RP11-701H24.3 | SOD3       | 0.186955467 | 8.12E-05    |
| RP11-701H24.3 | TMEM171    | 0.353603884 | 2.24E-14    |
| RP11-701H24.3 | PI16       | 0.222231788 | 2.58E-06    |
| RP11-701H24.3 | ZMAT4      | 0.346477767 | 7.93E-14    |
| RP11-701H24.3 | MFAP4      | 0.197061406 | 3.21E-05    |
| RP11-701H24.3 | CWH43      | 0.381706775 | 1.12E-16    |
| RP11-701H24.3 | SPX        | 0.494383651 | 1.95E-28    |
| RP11-701H24.3 | APOD       | 0.117247185 | 0.013968176 |
| RP11-701H24.3 | DPP6       | 0.427849981 | 5.75E-21    |
| RP11-701H24.3 | MMRN1      | 0.419198447 | 4.13E-20    |
| RP11-701H24.3 | WDR72      | 0.576802013 | 2.71E-40    |
| RP11-701H24.3 | MPPED2     | 0.448429502 | 4.19E-23    |
| RP11-701H24.3 | PAPSS2     | 0.403541688 | 1.27E-18    |
| RP11-701H24.3 | DCN        | 0.14362333  | 0.002558667 |
| RP11-701H24.3 | SORBS2     | 0.516151063 | 2.93E-31    |
| RP11-701H24.3 | EGR2       | 0.48786876  | 1.25E-27    |
| RP11-701H24.3 | EDN3       | 0.381789443 | 1.11E-16    |
| RP11-701H24.3 | DIO2       | 0.488527313 | 1.03E-27    |
| RP11-701H24.3 | ITPR1      | 0.518267424 | 1.52E-31    |
| RP11-701H24.3 | CFD        | 0.01468829  | 0.758924838 |
| RP11-701H24.3 | CPXM1      | 0.237412539 | 4.85E-07    |
| RP11-701H24.3 | ELMO1      | 0.3665514   | 2.09E-15    |
| RP11-701H24.3 | GPC3       | 0.320202953 | 6.35E-12    |
| RP11-701H24.3 | MYOC       | 0.329557143 | 1.40E-12    |
| RP11-701H24.3 | DEPTOR     | 0.467964955 | 2.84E-25    |
| RP11-701H24.3 | DGKI       | 0.520770292 | 6.95E-32    |
| RP11-701H24.3 | CARTPT     | 0.299959965 | 1.41E-10    |
| RP11-701H24.3 | IYD        | 0.490946923 | 5.21E-28    |
| RP11-701H24.3 | LYVE1      | 0.332074618 | 9.23E-13    |
| RP11-701H24.3 | CLCNKB     | 0.345457859 | 9.47E-14    |
| RP11-701H24.3 | NCAM1      | 0.299404423 | 1.53E-10    |
| RP11-701H24.3 | HBA2       | 0.094127776 | 0.048729503 |
| RP11-701H24.3 | GLT8D2     | 0.314587018 | 1.54E-11    |
| RP11-701H24.3 | OGDHL      | 0.323602366 | 3.69E-12    |
| RP11-701H24.3 | LIFR       | 0.603568921 | 6.46E-45    |
| RP11-701H24.3 | CSGALNACT1 | 0.548867638 | 6.66E-36    |
| RP11-701H24.3 | RAP1GAP    | 0.430226472 | 3.31E-21    |
| RP11-701H24.3 | COL9A3     | 0.257703846 | 4.33E-08    |
| RP11-701H24.3 | FBLN1      | 0.091369741 | 0.055754    |

|               |          |             |             |
|---------------|----------|-------------|-------------|
| RP11-701H24.3 | EFEMP1   | 0.399853765 | 2.77E-18    |
| RP11-701H24.3 | AOX1     | 0.35760677  | 1.09E-14    |
| RP11-701H24.3 | GRIN2C   | 0.340020368 | 2.42E-13    |
| RP11-701H24.3 | C11orf74 | 0.213387355 | 6.47E-06    |
| RP11-701H24.3 | PPARGC1A | 0.461304397 | 1.62E-24    |
| RP11-701H24.3 | ANGPTL1  | 0.515096074 | 4.06E-31    |
| RP11-701H24.3 | SCARA5   | 0.239886038 | 3.65E-07    |
| RP11-701H24.3 | LTF      | 0.249680369 | 1.15E-07    |
| RP11-701H24.3 | CA4      | 0.385545028 | 5.24E-17    |
| RP11-701H24.3 | TG       | 0.535506666 | 6.04E-34    |
| RP11-701H24.3 | FCGBP    | 0.351241009 | 3.42E-14    |
| RP11-701H24.3 | PBX4     | 0.26271015  | 2.31E-08    |
| RP11-701H24.3 | CYR61    | 0.341535762 | 1.87E-13    |
| RP11-701H24.3 | FOS      | 0.358443671 | 9.35E-15    |
| RP11-701H24.3 | KHDRBS2  | 0.416825927 | 7.02E-20    |
| RP11-701H24.3 | MUM1L1   | 0.354892764 | 1.78E-14    |
| RP11-701H24.3 | RGS16    | 0.339631449 | 2.59E-13    |
| RP11-701H24.3 | MT1M     | 0.207273014 | 1.20E-05    |
| RP11-701H24.3 | LRP2     | 0.593343271 | 4.24E-43    |
| RP11-701H24.3 | MAFB     | 0.359135981 | 8.24E-15    |
| RP11-701H24.3 | KCNK2    | 0.467329522 | 3.36E-25    |
| RP11-701H24.3 | TBC1D4   | 0.54322973  | 4.57E-35    |
| RP11-701H24.3 | MIOX     | 0.268809041 | 1.05E-08    |
| RP11-701H24.3 | TPPP     | 0.515023311 | 4.15E-31    |
| RP11-701H24.3 | FMOD     | 0.370750506 | 9.43E-16    |
| RP11-701H24.3 | CITED2   | 0.51233577  | 9.48E-31    |
| RP11-701H24.3 | RGS8     | 0.413949485 | 1.33E-19    |
| RP11-701H24.3 | ABI3BP   | 0.444185433 | 1.19E-22    |
| RP11-701H24.3 | ADH1B    | 0.244669869 | 2.09E-07    |
| RP11-701H24.3 | OGN      | 0.216253029 | 4.82E-06    |
| RP11-701H24.3 | NR4A1    | 0.332398292 | 8.75E-13    |
| RP11-701H24.3 | FOXJ1    | 0.352559545 | 2.71E-14    |
| RP11-701H24.3 | ALDH1A1  | 0.384054318 | 7.05E-17    |
| RP11-701H24.3 | OCA2     | 0.373959422 | 5.10E-16    |
| RP11-701H24.3 | TMEM139  | 0.247152111 | 1.56E-07    |
| RP11-701H24.3 | ARHGAP24 | 0.374146243 | 4.92E-16    |
| RP11-701H24.3 | SLC25A15 | 0.6057206   | 2.63E-45    |
| RP11-701H24.3 | DES      | 0.196355983 | 3.43E-05    |
| RP11-701H24.3 | GDF10    | 0.300810249 | 1.24E-10    |
| RP11-701H24.3 | KIAA1324 | 0.305557202 | 6.11E-11    |
| RP11-701H24.3 | JUN      | 0.384208921 | 6.84E-17    |
| RP11-701H24.3 | C7       | 0.110190899 | 0.020931978 |
| RP11-701H24.3 | LGI3     | 0.299141598 | 1.59E-10    |
| RP11-701H24.3 | CDON     | 0.539696552 | 1.50E-34    |
| RP11-701H24.3 | BCL2     | 0.559994241 | 1.33E-37    |
| RP11-701H24.3 | HLF      | 0.471304808 | 1.17E-25    |
| RP11-701H24.3 | EGR1     | 0.483056915 | 4.78E-27    |
| RP11-701H24.3 | IP6K3    | 0.407807458 | 5.08E-19    |
| RP11-701H24.3 | SCUBE3   | 0.417162366 | 6.51E-20    |
| RP11-701H24.3 | PKNOX2   | 0.375609441 | 3.71E-16    |
| RP11-701H24.3 | SMAD9    | 0.58251467  | 3.03E-41    |



|               |          |             |             |
|---------------|----------|-------------|-------------|
| RP11-701H24.3 | IQGAP2   | 0.514922039 | 4.29E-31    |
| RP11-701H24.3 | GNA14    | 0.407276276 | 5.70E-19    |
| RP11-701H24.3 | LAYN     | 0.333475975 | 7.31E-13    |
| RP11-701H24.3 | AVPR1A   | 0.490353757 | 6.16E-28    |
| RP11-701H24.3 | PDLIM3   | 0.253175109 | 7.56E-08    |
| RP11-701H24.3 | GPM6A    | 0.521508274 | 5.51E-32    |
| RP11-701H24.3 | SDPR     | 0.532692605 | 1.52E-33    |
| RP11-701H24.3 | CRYAB    | 0.182514811 | 0.00012028  |
| RP11-701H24.3 | FOXA2    | 0.288454981 | 7.37E-10    |
| RP11-701H24.3 | C8orf88  | 0.558810889 | 2.03E-37    |
| RP11-701H24.3 | ISM1     | 0.362538952 | 4.41E-15    |
| RP11-701H24.3 | BMP2     | 0.363417495 | 3.74E-15    |
| RP11-701H24.3 | ID4      | 0.436967452 | 6.77E-22    |
| RP11-701H24.3 | NUPR1    | 0.043616522 | 0.361928769 |
| RP11-701H24.3 | SERTM1   | 0.385764138 | 5.01E-17    |
| RP11-701H24.3 | IRS1     | 0.599190107 | 3.95E-44    |
| RP11-701H24.3 | FIBIN    | 0.244970505 | 2.02E-07    |
| RP11-701H24.3 | PODN     | 0.164315612 | 0.000547238 |
| RP11-701H24.3 | TDRD9    | 0.361833593 | 5.02E-15    |
| RP11-701H24.3 | EPHA3    | 0.392422603 | 1.30E-17    |
| RP11-701H24.3 | AIF1L    | 0.511185182 | 1.35E-30    |
| RP11-701H24.3 | EBF4     | 0.289598897 | 6.27E-10    |
| RP11-701H24.3 | ADM2     | 0.300641674 | 1.27E-10    |
| RP11-701H24.3 | GSTM3    | 0.31025884  | 2.99E-11    |
| RP11-701H24.3 | HSD17B6  | 0.353896637 | 2.13E-14    |
| RP11-701H24.3 | AGR3     | 0.347297024 | 6.87E-14    |
| RP11-701H24.3 | EPHB1    | 0.513283529 | 7.09E-31    |
| RP11-701H24.3 | TMOD1    | 0.309088537 | 3.58E-11    |
| RP11-701H24.3 | WASF3    | 0.652797111 | 1.16E-54    |
| RP11-701H24.3 | SELV     | 0.276237422 | 3.95E-09    |
| RP11-701H24.3 | ENPP1    | 0.361727499 | 5.12E-15    |
| RP11-701H24.3 | SYNE1    | 0.567823846 | 7.75E-39    |
| RP11-701H24.3 | PLCH1    | 0.439737685 | 3.49E-22    |
| RP11-701H24.3 | CCDC146  | 0.499483143 | 4.43E-29    |
| RP11-701H24.3 | SLC16A2  | 0.452002111 | 1.72E-23    |
| RP11-701H24.3 | IER2     | 0.199351376 | 2.58E-05    |
| RP11-701H24.3 | KCNAB1   | 0.37246348  | 6.80E-16    |
| RP11-701H24.3 | SYNDIG1  | 0.276939312 | 3.60E-09    |
| RP11-701H24.3 | C16orf89 | 0.210886897 | 8.34E-06    |
| RP11-701H24.3 | CTGF     | 0.375857374 | 3.54E-16    |
| RP11-701H24.3 | NR4A3    | 0.253985428 | 6.85E-08    |
| RP11-701H24.3 | KIAA1456 | 0.545107236 | 2.42E-35    |
| RP11-701H24.3 | AQP4     | 0.42356095  | 1.54E-20    |
| RP11-701H24.3 | RNF150   | 0.523736687 | 2.72E-32    |
| RP11-701H24.3 | C1S      | 0.023223943 | 0.627482162 |
| RP11-701H24.3 | PFKFB2   | 0.593766373 | 3.58E-43    |
| RP11-701H24.3 | PROX1    | 0.573969939 | 7.89E-40    |
| RP11-701H24.3 | TCF7L1   | 0.373193519 | 5.91E-16    |
| RP11-701H24.3 | HSPB6    | 0.193201292 | 4.60E-05    |
| RP11-701H24.3 | FHDC1    | 0.521070988 | 6.32E-32    |
| RP11-701H24.3 | PRR15L   | 0.242923928 | 2.57E-07    |

|               |          |              |             |
|---------------|----------|--------------|-------------|
| RP11-701H24.3 | SLC1A1   | 0.395058657  | 7.54E-18    |
| RP11-701H24.3 | BTBD11   | 0.417938928  | 5.48E-20    |
| RP11-701H24.3 | TRIM58   | 0.631568541  | 3.04E-50    |
| RP11-701H24.3 | LRIG1    | 0.540376664  | 1.20E-34    |
| RP11-701H24.3 | ROR2     | 0.322048676  | 4.73E-12    |
| RP11-701H24.3 | GPR125   | 0.583205561  | 2.32E-41    |
| RP11-701H24.3 | FLRT1    | 0.385144199  | 5.67E-17    |
| RP11-701H24.3 | PGF      | 0.202678038  | 1.88E-05    |
| RP11-701H24.3 | DUSP1    | 0.361523252  | 5.32E-15    |
| RP11-701H24.3 | PLA2G7   | 0.368475429  | 1.45E-15    |
| RP11-701H24.3 | PLSCR4   | 0.584173036  | 1.59E-41    |
| RP11-701H24.3 | FAM46B   | 0.163544724  | 0.000581581 |
| RP11-701H24.3 | GLDC     | 0.306472907  | 5.32E-11    |
| RP11-701H24.3 | ZBTB16   | 0.605355509  | 3.06E-45    |
| RP11-701H24.3 | OMD      | 0.181146924  | 0.000135497 |
| RP11-701H24.3 | HSD11B2  | 0.271105384  | 7.81E-09    |
| RP11-701H24.3 | FGL2     | 0.183860993  | 0.000106883 |
| RP11-701H24.3 | CLCNKA   | 0.276133825  | 4.01E-09    |
| RP11-701H24.3 | GATM     | 0.426667054  | 7.56E-21    |
| RP11-701H24.3 | TNS3     | 0.602458757  | 1.03E-44    |
| RP11-701H24.3 | TOB1     | 0.411523039  | 2.26E-19    |
| RP11-701H24.3 | MARC2    | 0.438841838  | 4.33E-22    |
| RP11-701H24.3 | LRRC2    | 0.558952443  | 1.93E-37    |
| RP11-701H24.3 | SORD     | 0.503137025  | 1.51E-29    |
| RP11-701H24.3 | RIMS4    | 0.426925766  | 7.12E-21    |
| RP11-701H24.3 | SLC29A4  | 0.313690462  | 1.76E-11    |
| RP11-701H24.3 | SLC39A14 | 0.592980592  | 4.90E-43    |
| RP11-701H24.3 | FAXDC2   | 0.476338204  | 3.02E-26    |
| RP11-701H24.3 | HSPB8    | 0.149593848  | 0.001671649 |
| RP11-701H24.3 | CCL19    | -0.104655731 | 0.028339578 |
| RP11-701H24.3 | KCNIP3   | 0.312740149  | 2.04E-11    |
| RP11-701H24.3 | CGNL1    | 0.530234557  | 3.39E-33    |
| RP11-701H24.3 | ATF3     | 0.208043618  | 1.11E-05    |
| RP11-701H24.3 | SGCD     | 0.367348102  | 1.80E-15    |
| RP11-701H24.3 | STARD13  | 0.656041082  | 2.27E-55    |
| RP11-701H24.3 | LDHD     | 0.232098589  | 8.81E-07    |
| RP11-701H24.3 | RCAN1    | 0.373729382  | 5.33E-16    |
| RP11-701H24.3 | ID3      | 0.155146795  | 0.001109471 |
| RP11-701H24.3 | SYTL3    | 0.429294315  | 4.12E-21    |
| RP11-701H24.3 | MT1E     | 0.034235516  | 0.474313526 |
| RP11-701H24.3 | CAMK1D   | 0.482057952  | 6.30E-27    |
| RP11-701H24.3 | PRKCQ    | 0.496624971  | 1.02E-28    |
| RP11-701H24.3 | NUAK2    | 0.32958026   | 1.39E-12    |
| RP11-701H24.3 | LIPG     | 0.554975597  | 7.91E-37    |
| RP11-701H24.3 | SLC25A25 | 0.52353471   | 2.90E-32    |
| RP11-701H24.3 | PRKX     | 0.550006879  | 4.49E-36    |
| RP11-701H24.3 | SRPX     | 0.175764612  | 0.000214727 |
| RP11-701H24.3 | FAM189A1 | 0.398636798  | 3.58E-18    |
| RP11-701H24.3 | PLEKHH1  | 0.655500964  | 2.99E-55    |
| RP11-701H24.3 | WNT11    | 0.236893271  | 5.14E-07    |
| RP11-701H24.3 | SNAI1    | 0.292853789  | 3.95E-10    |

|               |          |              |             |
|---------------|----------|--------------|-------------|
| RP11-701H24.3 | FDCSP    | -0.022819879 | 0.633484285 |
| RP11-701H24.3 | MT1X     | 0.063531107  | 0.183956252 |
| RP11-701H24.3 | ACACB    | 0.59479569   | 2.36E-43    |
| RP11-701H24.3 | ARC      | 0.257008699  | 4.72E-08    |
| RP11-701H24.3 | KLK4     | 0.191108407  | 5.58E-05    |
| RP11-701H24.3 | ZFPM2    | 0.481714705  | 6.93E-27    |
| RP11-701H24.3 | AKAP12   | 0.616999678  | 2.10E-47    |
| RP11-701H24.3 | GJB6     | 0.377654653  | 2.49E-16    |
| RP11-701H24.3 | ERO1LB   | 0.54736969   | 1.11E-35    |
| RP11-701H24.3 | DNALI1   | 0.291550017  | 4.75E-10    |
| RP11-701H24.3 | HKDC1    | 0.28953195   | 6.33E-10    |
| RP11-701H24.3 | ZFP36L2  | 0.483720858  | 3.98E-27    |
| RP11-701H24.3 | CAPSL    | 0.215677167  | 5.12E-06    |
| RP11-701H24.3 | CYP7B1   | 0.676311113  | 5.43E-60    |
| RP11-701H24.3 | CPQ      | 0.452501238  | 1.52E-23    |
| RP11-701H24.3 | RPS6KA6  | 0.583897325  | 1.77E-41    |
| RP11-701H24.3 | TLE1     | 0.373461592  | 5.61E-16    |
| RP11-701H24.3 | TP53INP2 | 0.493256325  | 2.69E-28    |
| RP11-701H24.3 | KATNAL2  | 0.432262127  | 2.06E-21    |
| RP11-701H24.3 | SGPP2    | 0.451450362  | 1.97E-23    |
| RP11-701H24.3 | CTH      | 0.463936479  | 8.16E-25    |
| RP11-701H24.3 | KIF12    | 0.200816276  | 2.25E-05    |
| RP11-701H24.3 | TMEM220  | 0.455970589  | 6.33E-24    |
| RP11-701H24.3 | CENPJ    | 0.478228759  | 1.81E-26    |
| RP11-701H24.3 | FAM155B  | 0.22703484   | 1.54E-06    |
| RP11-701H24.3 | WFS1     | 0.316630474  | 1.12E-11    |
| RP11-701H24.3 | SELENBP1 | 0.244616903  | 2.11E-07    |
| RP11-701H24.3 | SNTA1    | 0.165765619  | 0.000487687 |
| RP11-701H24.3 | FRAS1    | 0.555780384  | 5.96E-37    |
| RP11-701H24.3 | FBLN7    | 0.285240933  | 1.16E-09    |
| RP11-701H24.3 | AGPAT9   | 0.561496303  | 7.76E-38    |
| RP11-701H24.3 | GPR83    | 0.400631462  | 2.35E-18    |
| RP11-701H24.3 | PRTG     | 0.693885943  | 2.60E-64    |
| RP11-701H24.3 | EGR3     | 0.307517542  | 4.55E-11    |
| RP11-701H24.3 | GRAMD2   | 0.383647528  | 7.65E-17    |
| RP11-701H24.3 | HYOU1    | 0.524643172  | 2.04E-32    |
| RP11-701H24.3 | FBLN5    | 0.260101471  | 3.21E-08    |
| RP11-701H24.3 | ITM2A    | 0.436820367  | 7.01E-22    |
| RP11-701H24.3 | SRF      | 0.353232553  | 2.40E-14    |
| RP11-701H24.3 | FGFR2    | 0.631245009  | 3.53E-50    |
| RP11-701H24.3 | MT1A     | 0.046526892  | 0.330755109 |
| RP11-701H24.3 | MAMDC2   | 0.433212157  | 1.65E-21    |
| RP11-701H24.3 | FHL2     | 0.129800108  | 0.006461565 |
| RP11-701H24.3 | FTCDNL1  | 0.403548496  | 1.27E-18    |
| RP11-701H24.3 | PKIA     | 0.443527873  | 1.39E-22    |
| RP11-701H24.3 | DNAJB4   | 0.655677268  | 2.73E-55    |
| RP11-701H24.3 | SLC25A33 | 0.242003969  | 2.86E-07    |
| RP11-701H24.3 | EYA2     | 0.290518857  | 5.50E-10    |
| RP11-701H24.3 | LPAR1    | 0.288810563  | 7.01E-10    |
| RP11-701H24.3 | STX11    | 0.309473059  | 3.38E-11    |
| RP11-701H24.3 | ARHGEF28 | 0.499117202  | 4.93E-29    |

|               |         |              |             |
|---------------|---------|--------------|-------------|
| RP11-701H24.3 | OR2W3   | 0.38230631   | 9.99E-17    |
| RP11-701H24.3 | ALDH1B1 | 0.330507252  | 1.20E-12    |
| RP11-701H24.3 | CXCL12  | 0.173958734  | 0.000249854 |
| RP11-701H24.3 | OLFM2   | 0.187252475  | 7.91E-05    |
| RP11-701H24.3 | TUB     | 0.691715825  | 9.24E-64    |
| RP11-701H24.3 | HTRA3   | 0.138549794  | 0.003629297 |
| RP11-701H24.3 | CKB     | -0.0170662   | 0.721403948 |
| RP11-701H24.3 | RGS2    | 0.050461469  | 0.291451422 |
| RP11-701H24.3 | SHANK2  | 0.65941143   | 4.10E-56    |
| RP11-701H24.3 | CNTFR   | 0.293479569  | 3.61E-10    |
| RP11-701H24.3 | CYTH3   | 0.551543407  | 2.63E-36    |
| RP11-701H24.3 | PLAC9   | -0.004957513 | 0.917505907 |
| RP11-701H24.3 | WVOX    | 0.412548526  | 1.81E-19    |
| RP11-701H24.3 | NPR3    | 0.461077882  | 1.71E-24    |
| RP11-701H24.3 | SDC2    | 0.552720519  | 1.75E-36    |
| RP11-701H24.3 | KLF15   | 0.385841899  | 4.93E-17    |
| RP11-701H24.3 | TMEM164 | 0.530337106  | 3.28E-33    |
| RP11-701H24.3 | LONRF3  | 0.692825989  | 4.84E-64    |
| RP11-701H24.3 | GBP1    | 0.140284753  | 0.003224433 |
| RP11-701H24.3 | ARHGAP6 | 0.563515363  | 3.74E-38    |
| RP11-701H24.3 | TMEM119 | 0.067645252  | 0.157096187 |
| RP11-701H24.3 | SH3RF1  | 0.738031377  | 1.13E-76    |
| RP11-701H24.3 | CRELD2  | 0.086536053  | 0.070084929 |
| RP11-701H24.3 | PCP4    | 0.034771095  | 0.46742325  |
| RP11-701H24.3 | GCSH    | 0.322143423  | 4.66E-12    |
| RP11-701H24.3 | IMPA2   | 0.427722469  | 5.93E-21    |
| RP11-701H24.3 | C1R     | -0.082319643 | 0.084925518 |
| RP11-701H24.3 | SUCNR1  | 0.344821575  | 1.06E-13    |
| RP11-701H24.3 | SFRP1   | 0.322316891  | 4.53E-12    |
| RP11-701H24.3 | UGT8    | 0.418043887  | 5.35E-20    |
| RP11-701H24.3 | TLE4    | 0.379704864  | 1.67E-16    |
| RP11-701H24.3 | ANTXR1  | 0.521612667  | 5.33E-32    |
| RP11-701H24.3 | GPX3    | 0.253173407  | 7.56E-08    |
| RP11-701H24.3 | DPY19L2 | 0.414352702  | 1.22E-19    |
| RP11-701H24.3 | FAM46C  | 0.361522543  | 5.32E-15    |
| RP11-701H24.3 | IL33    | 0.238207123  | 4.43E-07    |
| RP11-701H24.3 | PEG3    | 0.711149297  | 7.23E-69    |
| RP11-701H24.3 | FAHD2A  | 0.238499442  | 4.28E-07    |
| RP11-701H24.3 | PTGDS   | -0.044393367 | 0.353433543 |
| RP11-701H24.3 | CHCHD10 | -0.091059968 | 0.05659303  |
| RP11-701H24.3 | CD36    | 0.404382928  | 1.06E-18    |
| RP11-701H24.3 | ANKRD37 | 0.174962519  | 0.000229716 |
| RP11-701H24.3 | TSPAN33 | 0.100920527  | 0.034524604 |
| RP11-701H24.3 | PRDM16  | 0.619491342  | 7.03E-48    |
| RP11-701H24.3 | UST     | 0.449201099  | 3.46E-23    |
| RP11-701H24.3 | NEXN    | 0.455032474  | 8.02E-24    |
| RP11-701H24.3 | NUPR1L  | 0.058216893  | 0.223477045 |
| RP11-701H24.3 | SLC24A3 | 0.353677498  | 2.22E-14    |
| RP11-701H24.3 | MARC1   | 0.423777111  | 1.47E-20    |
| RP11-701H24.3 | MYH11   | 0.333832413  | 6.89E-13    |
| RP11-701H24.3 | APOA1   | 0.141504421  | 0.002964853 |

|               |          |             |             |
|---------------|----------|-------------|-------------|
| RP11-701H24.3 | TMEM178B | 0.440491695 | 2.91E-22    |
| RP11-701H24.3 | CAPN6    | 0.271497758 | 7.42E-09    |
| RP11-701H24.3 | PPM1L    | 0.579127301 | 1.12E-40    |
| RP11-701H24.3 | FZD8     | 0.373840725 | 5.22E-16    |
| RP11-701H24.3 | RCAN2    | 0.363605572 | 3.62E-15    |
| RP11-701H24.3 | COPZ2    | 0.113926196 | 0.016940674 |
| RP11-701H24.3 | GAS1     | 0.26469134  | 1.79E-08    |
| RP11-701H24.3 | DACT1    | 0.367798579 | 1.65E-15    |
| RP11-701H24.3 | WBSCR17  | 0.397352882 | 4.68E-18    |
| RP11-701H24.3 | NCS1     | 0.389585422 | 2.32E-17    |
| RP11-701H24.3 | SPIRE2   | 0.217443488 | 4.26E-06    |
| RP11-701H24.3 | C15orf52 | 0.352582369 | 2.70E-14    |
| RP11-701H24.3 | SPAG5    | 0.2100875   | 9.04E-06    |
| RP11-701H24.3 | ARL4D    | 0.064290223 | 0.178760735 |
| RP11-701H24.3 | FAM189A2 | 0.451132362 | 2.14E-23    |
| RP11-701H24.3 | MAP1LC3A | 0.039890445 | 0.404423812 |
| RP11-701H24.3 | KLF6     | 0.333593133 | 7.17E-13    |
| RP11-701H24.3 | ADD3     | 0.662451864 | 8.59E-57    |
| RP11-701H24.3 | TSPAN7   | 0.303423963 | 8.41E-11    |
| RP11-701H24.3 | KLF9     | 0.484645498 | 3.07E-27    |
| RP11-701H24.3 | KCNQ1    | 0.313206511 | 1.90E-11    |
| RP11-701H24.3 | MAN1A1   | 0.340435811 | 2.25E-13    |
| RP11-701H24.3 | MLF1     | 0.367129672 | 1.87E-15    |
| RP11-701H24.3 | RARB     | 0.531280469 | 2.41E-33    |
| RP11-701H24.3 | CDC42EP2 | 0.035746939 | 0.455012309 |
| RP11-701H24.3 | FAM3B    | 0.202441453 | 1.92E-05    |
| RP11-701H24.3 | GADD45B  | 0.073912495 | 0.122022692 |
| RP11-701H24.3 | TMEM47   | 0.494204368 | 2.05E-28    |
| RP11-701H24.3 | SDF2L1   | -0.03679824 | 0.441851151 |
| RP11-701H24.3 | CCDC85A  | 0.719011221 | 4.69E-71    |
| RP11-701H24.3 | CRYBG3   | 0.759136265 | 1.64E-83    |
| RP11-701H24.3 | FBLN2    | 0.129883225 | 0.006427243 |
| RP11-701H24.3 | PEBP4    | 0.000321688 | 0.994637542 |
| RP11-701H24.3 | CDADC1   | 0.435709777 | 9.13E-22    |
| RP11-701H24.3 | FAM63A   | 0.579932088 | 8.20E-41    |
| RP11-701H24.3 | GLUL     | 0.483363285 | 4.39E-27    |
| RP11-701H24.3 | FREM2    | 0.551584682 | 2.60E-36    |
| RP11-701H24.3 | ACKR3    | 0.384603798 | 6.32E-17    |
| RP11-701H24.3 | DENND6A  | 0.627082923 | 2.36E-49    |
| RP11-701H24.3 | CLDN8    | 0.287223682 | 8.76E-10    |
| RP11-701H24.3 | UTS2R    | 0.42377654  | 1.47E-20    |
| RP11-701H24.3 | SCNN1B   | 0.270778732 | 8.15E-09    |
| RP11-701H24.3 | TTC30A   | 0.586098625 | 7.51E-42    |
| RP11-701H24.3 | CORO2B   | 0.404834539 | 9.63E-19    |
| RP11-701H24.3 | TC2N     | 0.434943995 | 1.09E-21    |
| RP11-701H24.3 | ALDH2    | 0.110369189 | 0.020724373 |
| RP11-701H24.3 | GPR183   | 0.054238041 | 0.256791202 |
| RP11-701H24.3 | C4orf47  | 0.242298849 | 2.76E-07    |
| RP11-701H24.3 | SLC25A42 | 0.321143893 | 5.46E-12    |
| RP11-701H24.3 | LGMN     | 0.350959603 | 3.60E-14    |
| RP11-701H24.3 | ACSF2    | 0.171716846 | 0.000300937 |

|               |          |              |             |
|---------------|----------|--------------|-------------|
| RP11-701H24.3 | KIAA1467 | 0.57815245   | 1.62E-40    |
| RP11-701H24.3 | PRKG1    | 0.475817943  | 3.48E-26    |
| RP11-701H24.3 | GNAI1    | 0.451312212  | 2.04E-23    |
| RP11-701H24.3 | ABCC4    | 0.433434133  | 1.56E-21    |
| RP11-701H24.3 | PRPS1    | 0.440279364  | 3.06E-22    |
| RP11-701H24.3 | TSPAN5   | 0.301649573  | 1.10E-10    |
| RP11-701H24.3 | CR2      | 0.130345918  | 0.00623915  |
| RP11-701H24.3 | CCDC170  | 0.515642858  | 3.43E-31    |
| RP11-701H24.3 | RRAD     | -0.128847242 | 0.006866943 |
| RP11-701H24.3 | SCGB2A1  | 0.061297872  | 0.199885813 |
| RP11-701H24.3 | SESN3    | 0.466910959  | 3.75E-25    |
| RP11-701H24.3 | SGK223   | 0.349473002  | 4.68E-14    |
| RP11-701H24.3 | NDRG2    | 0.355151759  | 1.70E-14    |
| RP11-701H24.3 | C3orf52  | 0.327725164  | 1.89E-12    |
| RP11-701H24.3 | FLRT3    | 0.062195847  | 0.193363965 |
| RP11-701H24.3 | MST1R    | -0.267182861 | 1.30E-08    |
| RP11-701H24.3 | SDC1     | -0.34659327  | 7.77E-14    |
| RP11-701H24.3 | ST8SIA4  | -0.221791382 | 2.70E-06    |
| RP11-701H24.3 | UBTD1    | -0.633297685 | 1.37E-50    |
| RP11-701H24.3 | EPHA2    | -0.061813736 | 0.19611988  |
| RP11-701H24.3 | TMEM130  | -0.14040333  | 0.00319832  |
| RP11-701H24.3 | SPINK2   | -0.515265003 | 3.86E-31    |
| RP11-701H24.3 | MMP16    | -0.114908706 | 0.016008401 |
| RP11-701H24.3 | SIGLEC15 | -0.24884154  | 1.28E-07    |
| RP11-701H24.3 | RIN1     | -0.536895966 | 3.82E-34    |
| RP11-701H24.3 | IL1RN    | -0.319638569 | 6.94E-12    |
| RP11-701H24.3 | FCER1G   | -0.411705585 | 2.18E-19    |
| RP11-701H24.3 | CD276    | -0.378672995 | 2.04E-16    |
| RP11-701H24.3 | CTSB     | -0.312873051 | 2.00E-11    |
| RP11-701H24.3 | FAM171A2 | -0.094908025 | 0.046882255 |
| RP11-701H24.3 | ASPHD1   | -0.467782551 | 2.98E-25    |
| RP11-701H24.3 | C15orf48 | -0.434175802 | 1.31E-21    |
| RP11-701H24.3 | DYSF     | -0.076804566 | 0.108049822 |
| RP11-701H24.3 | PDZRN4   | -0.013608054 | 0.776164662 |
| RP11-701H24.3 | EFHD2    | -0.368714851 | 1.39E-15    |
| RP11-701H24.3 | ASF1B    | -0.427118524 | 6.81E-21    |
| RP11-701H24.3 | AQP1     | -0.189102465 | 6.70E-05    |
| RP11-701H24.3 | ARRDC2   | -0.4138462   | 1.36E-19    |
| RP11-701H24.3 | PRSS1    | -0.275115791 | 4.59E-09    |
| RP11-701H24.3 | MAPK13   | -0.190151355 | 6.09E-05    |
| RP11-701H24.3 | CST5     | -0.411929999 | 2.07E-19    |
| RP11-701H24.3 | AHR      | -0.021590966 | 0.651885934 |
| RP11-701H24.3 | BAX      | -0.716727491 | 2.06E-70    |
| RP11-701H24.3 | C1orf115 | -0.03421807  | 0.474538902 |
| RP11-701H24.3 | PLK3     | -0.338369235 | 3.21E-13    |
| RP11-701H24.3 | JAG2     | -0.283083864 | 1.56E-09    |
| RP11-701H24.3 | RAD23B   | -0.023240822 | 0.62723197  |
| RP11-701H24.3 | CA12     | 0.012686818  | 0.790954654 |
| RP11-701H24.3 | ADTRP    | -0.133634408 | 0.005038561 |
| RP11-701H24.3 | UCP2     | -0.380900698 | 1.32E-16    |
| RP11-701H24.3 | IGFBP2   | -0.29279053  | 3.98E-10    |

|               |          |              |             |
|---------------|----------|--------------|-------------|
| RP11-701H24.3 | LOXL2    | -0.258190491 | 4.07E-08    |
| RP11-701H24.3 | GPX1     | -0.749337405 | 2.99E-80    |
| RP11-701H24.3 | P3H3     | -0.594476839 | 2.69E-43    |
| RP11-701H24.3 | C2orf81  | -0.389475356 | 2.37E-17    |
| RP11-701H24.3 | CDT1     | -0.487757276 | 1.28E-27    |
| RP11-701H24.3 | SNX25    | -0.012270099 | 0.797669949 |
| RP11-701H24.3 | MTHFD1L  | -0.243859632 | 2.30E-07    |
| RP11-701H24.3 | CDC42BPG | -0.109671494 | 0.021547112 |
| RP11-701H24.3 | MSN      | -0.002735624 | 0.954422215 |
| RP11-701H24.3 | SIGLEC6  | -0.161216573 | 0.000697817 |
| RP11-701H24.3 | F2R      | 0.022078036  | 0.64456647  |
| RP11-701H24.3 | TMEM184A | -0.377784948 | 2.43E-16    |
| RP11-701H24.3 | CKS2     | -0.506897569 | 4.92E-30    |
| RP11-701H24.3 | TAX1BP3  | -0.71016934  | 1.34E-68    |
| RP11-701H24.3 | PMEPA1   | -0.383132515 | 8.48E-17    |
| RP11-701H24.3 | CXCL16   | -0.397843357 | 4.23E-18    |
| RP11-701H24.3 | FAXC     | -0.27704257  | 3.55E-09    |
| RP11-701H24.3 | VTCN1    | -0.289526196 | 6.34E-10    |
| RP11-701H24.3 | SH2D4A   | -0.129786066 | 0.00646738  |
| RP11-701H24.3 | RNF24    | -0.001153708 | 0.980769686 |
| RP11-701H24.3 | LY6G6C   | -0.29797523  | 1.88E-10    |
| RP11-701H24.3 | NID1     | -0.01515905  | 0.751448483 |
| RP11-701H24.3 | STAC     | -0.293727935 | 3.48E-10    |
| RP11-701H24.3 | RAB34    | -0.5681614   | 6.85E-39    |
| RP11-701H24.3 | HES4     | -0.472909418 | 7.62E-26    |
| RP11-701H24.3 | EPHA10   | -0.271749469 | 7.17E-09    |
| RP11-701H24.3 | ENTPD2   | -0.278795684 | 2.80E-09    |
| RP11-701H24.3 | DDB2     | -0.484174597 | 3.50E-27    |
| RP11-701H24.3 | NKAIN4   | -0.365055154 | 2.76E-15    |
| RP11-701H24.3 | TRIM29   | -0.2020592   | 1.99E-05    |
| RP11-701H24.3 | ADCY8    | -0.296786601 | 2.24E-10    |
| RP11-701H24.3 | SFTA2    | -0.405003893 | 9.29E-19    |
| RP11-701H24.3 | NRIP1    | 0.089180618  | 0.061910611 |
| RP11-701H24.3 | VWA1     | -0.38361533  | 7.70E-17    |
| RP11-701H24.3 | APLNR    | -0.148308656 | 0.001834468 |
| RP11-701H24.3 | REN      | -0.425304295 | 1.03E-20    |
| RP11-701H24.3 | EDIL3    | -0.100716281 | 0.034893633 |
| RP11-701H24.3 | AGRN     | -0.061475027 | 0.198586647 |
| RP11-701H24.3 | TREM1    | -0.362302509 | 4.60E-15    |
| RP11-701H24.3 | SRL      | -0.133498669 | 0.005083671 |
| RP11-701H24.3 | RASGRF1  | -0.247253667 | 1.54E-07    |
| RP11-701H24.3 | RMI2     | -0.508888403 | 2.70E-30    |
| RP11-701H24.3 | SAMD1    | -0.701641488 | 2.57E-66    |
| RP11-701H24.3 | MGAT4B   | -0.335383976 | 5.31E-13    |
| RP11-701H24.3 | NXN      | -0.35400103  | 2.09E-14    |
| RP11-701H24.3 | SH3BGRL3 | -0.733590012 | 2.56E-75    |
| RP11-701H24.3 | CA11     | -0.417382924 | 6.20E-20    |
| RP11-701H24.3 | PLD3     | -0.403825931 | 1.19E-18    |
| RP11-701H24.3 | LURAP1L  | -0.254285273 | 6.60E-08    |
| RP11-701H24.3 | CARNS1   | -0.132479423 | 0.005434186 |
| RP11-701H24.3 | PDLIM7   | -0.527054697 | 9.45E-33    |

|               |          |              |             |
|---------------|----------|--------------|-------------|
| RP11-701H24.3 | BCL2L1   | -0.474468357 | 5.01E-26    |
| RP11-701H24.3 | GGT6     | -0.232755865 | 8.19E-07    |
| RP11-701H24.3 | DPYSL3   | -0.178075432 | 0.0001765   |
| RP11-701H24.3 | FYN      | -0.302004876 | 1.04E-10    |
| RP11-701H24.3 | TK1      | -0.553744162 | 1.22E-36    |
| RP11-701H24.3 | AK1      | -0.538405829 | 2.31E-34    |
| RP11-701H24.3 | HIGD1B   | -0.27899369  | 2.72E-09    |
| RP11-701H24.3 | TMEM59L  | -0.272785168 | 6.26E-09    |
| RP11-701H24.3 | MEGF9    | 0.130784887  | 0.006065283 |
| RP11-701H24.3 | ZFP36L1  | -0.053176953 | 0.266228021 |
| RP11-701H24.3 | ADRA1B   | -0.115559458 | 0.015415953 |
| RP11-701H24.3 | EPHA4    | -0.006621695 | 0.88996708  |
| RP11-701H24.3 | TCERG1L  | -0.027494394 | 0.565603995 |
| RP11-701H24.3 | NGFR     | -0.149682213 | 0.001660956 |
| RP11-701H24.3 | EBI3     | -0.507701505 | 3.86E-30    |
| RP11-701H24.3 | S100A10  | -0.493922395 | 2.22E-28    |
| RP11-701H24.3 | S100B    | -0.372034421 | 7.38E-16    |
| RP11-701H24.3 | CD44     | -0.073005442 | 0.126683609 |
| RP11-701H24.3 | BHLHE41  | -0.014594819 | 0.760411997 |
| RP11-701H24.3 | FBXO2    | -0.498531554 | 5.85E-29    |
| RP11-701H24.3 | SLC30A2  | -0.252837109 | 7.88E-08    |
| RP11-701H24.3 | FRMD5    | -0.342493876 | 1.58E-13    |
| RP11-701H24.3 | SAMD11   | -0.183164996 | 0.000113624 |
| RP11-701H24.3 | SIPA1L2  | 0.026822934  | 0.575137485 |
| RP11-701H24.3 | S100A16  | -0.597530889 | 7.78E-44    |
| RP11-701H24.3 | PPL      | -0.063296791 | 0.185582242 |
| RP11-701H24.3 | ARHGD1B  | -0.400815851 | 2.26E-18    |
| RP11-701H24.3 | CDC42EP3 | -0.314089026 | 1.66E-11    |
| RP11-701H24.3 | RUNX2    | -0.192520187 | 4.90E-05    |
| RP11-701H24.3 | LAMC2    | -0.174726927 | 0.000234301 |
| RP11-701H24.3 | BRINP1   | -0.237018372 | 5.07E-07    |
| RP11-701H24.3 | GPRC5B   | -0.029439982 | 0.538415506 |
| RP11-701H24.3 | AQP5     | -0.16778709  | 0.00041467  |
| RP11-701H24.3 | PLAG1    | -0.017683052 | 0.711774719 |
| RP11-701H24.3 | PTPRU    | -0.176893356 | 0.000195178 |
| RP11-701H24.3 | ANGPTL4  | -0.354676603 | 1.85E-14    |
| RP11-701H24.3 | PALM3    | -0.213448912 | 6.43E-06    |
| RP11-701H24.3 | ACP5     | -0.43324634  | 1.63E-21    |
| RP11-701H24.3 | DLG4     | -0.178806038 | 0.000165808 |
| RP11-701H24.3 | ETNK2    | -0.30017829  | 1.36E-10    |
| RP11-701H24.3 | CD109    | -0.067942261 | 0.155278297 |
| RP11-701H24.3 | SNX22    | -0.195493673 | 3.72E-05    |
| RP11-701H24.3 | TMEM98   | -0.217955948 | 4.04E-06    |
| RP11-701H24.3 | CTHRC1   | -0.334874211 | 5.78E-13    |
| RP11-701H24.3 | S100A2   | -0.421613943 | 2.40E-20    |
| RP11-701H24.3 | C11orf80 | -0.519639278 | 9.91E-32    |
| RP11-701H24.3 | SREBF1   | -0.353171279 | 2.43E-14    |
| RP11-701H24.3 | PRSS22   | -0.394008632 | 9.37E-18    |
| RP11-701H24.3 | CMTM3    | -0.589328271 | 2.10E-42    |
| RP11-701H24.3 | RDH5     | -0.175278676 | 0.000223694 |
| RP11-701H24.3 | MYH10    | 0.025321582  | 0.596723421 |



|               |          |              |             |
|---------------|----------|--------------|-------------|
| RP11-701H24.3 | EVPL     | -0.225332645 | 1.85E-06    |
| RP11-701H24.3 | SCD      | -0.167043435 | 0.000440259 |
| RP11-701H24.3 | CD151    | -0.506725236 | 5.18E-30    |
| RP11-701H24.3 | S100A4   | -0.46609525  | 4.64E-25    |
| RP11-701H24.3 | BNIP1    | -0.245340134 | 1.93E-07    |
| RP11-701H24.3 | MAP3K6   | -0.381156573 | 1.25E-16    |
| RP11-701H24.3 | MANEAL   | -0.347367563 | 6.78E-14    |
| RP11-701H24.3 | CD207    | -0.300710537 | 1.26E-10    |
| RP11-701H24.3 | CD1A     | -0.317489369 | 9.75E-12    |
| RP11-701H24.3 | C3       | -0.240955504 | 3.23E-07    |
| RP11-701H24.3 | NT5E     | -0.1562354   | 0.001022169 |
| RP11-701H24.3 | CACNG4   | -0.320941151 | 5.64E-12    |
| RP11-701H24.3 | FHOD1    | -0.360212672 | 6.77E-15    |
| RP11-701H24.3 | LEMD1    | -0.374330632 | 4.75E-16    |
| RP11-701H24.3 | ATP11A   | 0.060504148  | 0.205782543 |
| RP11-701H24.3 | PPAP2C   | -0.377673464 | 2.48E-16    |
| RP11-701H24.3 | DRAM1    | -0.275741067 | 4.22E-09    |
| RP11-701H24.3 | CDA      | -0.356017111 | 1.45E-14    |
| RP11-701H24.3 | CCND2    | -0.16626815  | 0.000468495 |
| RP11-701H24.3 | LCN6     | -0.16394379  | 0.000563561 |
| RP11-701H24.3 | CDH4     | -0.227568859 | 1.45E-06    |
| RP11-701H24.3 | MMP11    | -0.487628913 | 1.33E-27    |
| RP11-701H24.3 | B3GAT1   | -0.088864461 | 0.062844435 |
| RP11-701H24.3 | SPP1     | -0.194151605 | 4.22E-05    |
| RP11-701H24.3 | HLA-DQB1 | -0.382360492 | 9.88E-17    |
| RP11-701H24.3 | SDC3     | -0.287894575 | 7.97E-10    |
| RP11-701H24.3 | CX3CL1   | -0.293472486 | 3.61E-10    |
| RP11-701H24.3 | SDK1     | -0.156456241 | 0.00100525  |
| RP11-701H24.3 | DOCK9    | 0.15539033   | 0.001089364 |
| RP11-701H24.3 | CSF2     | -0.497288113 | 8.40E-29    |
| RP11-701H24.3 | GRHL3    | -0.313029782 | 1.95E-11    |
| RP11-701H24.3 | TMEM92   | -0.45343219  | 1.20E-23    |
| RP11-701H24.3 | BASP1    | -0.44712885  | 5.77E-23    |
| RP11-701H24.3 | HRH1     | -0.273917459 | 5.39E-09    |
| RP11-701H24.3 | ESM1     | -0.081514288 | 0.088029621 |
| RP11-701H24.3 | B4GALNT3 | -0.151623687 | 0.00144129  |
| RP11-701H24.3 | LMO3     | -0.114067325 | 0.016803907 |
| RP11-701H24.3 | C9orf16  | -0.740593392 | 1.81E-77    |
| RP11-701H24.3 | SEMA3F   | -0.238885808 | 4.10E-07    |
| RP11-701H24.3 | PLA2G12B | -0.220408024 | 3.13E-06    |
| RP11-701H24.3 | KLK6     | -0.242050206 | 2.84E-07    |
| RP11-701H24.3 | ST3GAL5  | -0.256606447 | 4.96E-08    |
| RP11-701H24.3 | FAM132B  | -0.102855194 | 0.031190906 |
| RP11-701H24.3 | CDKN1A   | -0.225097336 | 1.90E-06    |
| RP11-701H24.3 | E2F1     | -0.453452118 | 1.20E-23    |
| RP11-701H24.3 | B3GNT8   | -0.48796365  | 1.21E-27    |
| RP11-701H24.3 | MTMR11   | -0.314579643 | 1.54E-11    |
| RP11-701H24.3 | MYO1G    | -0.344641299 | 1.09E-13    |
| RP11-701H24.3 | TMSB10   | -0.726224237 | 3.94E-73    |
| RP11-701H24.3 | UNC5CL   | -0.4024389   | 1.60E-18    |
| RP11-701H24.3 | ABR      | -0.237630686 | 4.73E-07    |

|               |          |              |             |
|---------------|----------|--------------|-------------|
| RP11-701H24.3 | PLP2     | -0.614943173 | 5.13E-47    |
| RP11-701H24.3 | SRCIN1   | -0.269224899 | 9.99E-09    |
| RP11-701H24.3 | PDE9A    | -0.468655563 | 2.37E-25    |
| RP11-701H24.3 | TREM2    | -0.455734287 | 6.72E-24    |
| RP11-701H24.3 | KDEL3    | -0.34385722  | 1.25E-13    |
| RP11-701H24.3 | PC       | -0.197450609 | 3.10E-05    |
| RP11-701H24.3 | C2CD4A   | -0.311835508 | 2.35E-11    |
| RP11-701H24.3 | PELI1    | -0.203464387 | 1.74E-05    |
| RP11-701H24.3 | SSX1     | -0.216123546 | 4.89E-06    |
| RP11-701H24.3 | MROH6    | -0.433656534 | 1.48E-21    |
| RP11-701H24.3 | ESPN     | -0.357212094 | 1.17E-14    |
| RP11-701H24.3 | BMP1     | -0.300242117 | 1.35E-10    |
| RP11-701H24.3 | TM4SF4   | -0.245052377 | 2.00E-07    |
| RP11-701H24.3 | CORO2A   | -0.10740166  | 0.024422824 |
| RP11-701H24.3 | CD164L2  | -0.484615445 | 3.10E-27    |
| RP11-701H24.3 | CTSS     | -0.270467114 | 8.49E-09    |
| RP11-701H24.3 | CLU      | -0.327111857 | 2.09E-12    |
| RP11-701H24.3 | TMSB4X   | -0.555700246 | 6.13E-37    |
| RP11-701H24.3 | WNT10A   | -0.33180294  | 9.65E-13    |
| RP11-701H24.3 | NAPSA    | -0.352941076 | 2.53E-14    |
| RP11-701H24.3 | PLEKHA4  | -0.218897609 | 3.66E-06    |
| RP11-701H24.3 | SFTPA1   | -0.192568297 | 4.88E-05    |
| RP11-701H24.3 | C1orf116 | -0.165671722 | 0.000491353 |
| RP11-701H24.3 | TM4SF1   | -0.308207015 | 4.09E-11    |
| RP11-701H24.3 | SEL1L3   | -0.106768922 | 0.025281293 |
| RP11-701H24.3 | VASN     | -0.464990617 | 6.20E-25    |
| RP11-701H24.3 | NPTXR    | -0.208609834 | 1.05E-05    |
| RP11-701H24.3 | PDE4C    | -0.345068089 | 1.01E-13    |
| RP11-701H24.3 | CDC42EP1 | -0.407965607 | 4.91E-19    |
| RP11-701H24.3 | ENDOD1   | -0.117908149 | 0.013434635 |
| RP11-701H24.3 | RYR1     | -0.333573843 | 7.19E-13    |
| RP11-701H24.3 | IL1RAP   | -0.03398574  | 0.477545834 |
| RP11-701H24.3 | SLC35F2  | -0.179866849 | 0.000151359 |
| RP11-701H24.3 | ISYNA1   | -0.503786926 | 1.24E-29    |
| RP11-701H24.3 | HLA-G    | -0.329577139 | 1.39E-12    |
| RP11-701H24.3 | CDKN2B   | -0.295501474 | 2.70E-10    |
| RP11-701H24.3 | ALDH1A3  | -0.256038954 | 5.32E-08    |
| RP11-701H24.3 | CLIP3    | -0.310063671 | 3.09E-11    |
| RP11-701H24.3 | ULBP2    | -0.306837288 | 5.04E-11    |
| RP11-701H24.3 | ETHE1    | -0.499045432 | 5.03E-29    |
| RP11-701H24.3 | XPR1     | -0.15331028  | 0.001272472 |
| RP11-701H24.3 | SPTBN2   | -0.203164684 | 1.79E-05    |
| RP11-701H24.3 | IVL      | -0.377190055 | 2.73E-16    |
| RP11-701H24.3 | MARCO    | -0.373116785 | 6.00E-16    |
| RP11-701H24.3 | PLXND1   | -0.181744207 | 0.000128643 |
| RP11-701H24.3 | EMILIN2  | -0.335762966 | 4.98E-13    |
| RP11-701H24.3 | PLAUR    | -0.437458353 | 6.02E-22    |
| RP11-701H24.3 | CDC42EP5 | -0.558664513 | 2.14E-37    |
| RP11-701H24.3 | TRPC5    | 0.024595437  | 0.607293853 |
| RP11-701H24.3 | TMEM100  | -0.25981737  | 3.33E-08    |
| RP11-701H24.3 | QSOX1    | -0.309888218 | 3.17E-11    |

|               |           |              |             |
|---------------|-----------|--------------|-------------|
| RP11-701H24.3 | ARHGAP23  | -0.136982204 | 0.004034149 |
| RP11-701H24.3 | MDF1      | -0.33653811  | 4.37E-13    |
| RP11-701H24.3 | FSTL3     | -0.36031749  | 6.64E-15    |
| RP11-701H24.3 | INF2      | -0.329003406 | 1.53E-12    |
| RP11-701H24.3 | TGFBR1    | -0.101183636 | 0.034054125 |
| RP11-701H24.3 | TGFBI     | -0.293539433 | 3.58E-10    |
| RP11-701H24.3 | ERBB3     | -0.204375694 | 1.59E-05    |
| RP11-701H24.3 | CCL18     | -0.224019653 | 2.13E-06    |
| RP11-701H24.3 | CCL17     | -0.392269006 | 1.34E-17    |
| RP11-701H24.3 | C16orf45  | -0.246407321 | 1.70E-07    |
| RP11-701H24.3 | PRDM1     | -0.046496821 | 0.331068088 |
| RP11-701H24.3 | TRIM47    | -0.629729757 | 7.07E-50    |
| RP11-701H24.3 | CNFN      | -0.621806843 | 2.52E-48    |
| RP11-701H24.3 | ARMCX3    | -0.026101547 | 0.585463422 |
| RP11-701H24.3 | RAMP1     | -0.352492018 | 2.74E-14    |
| RP11-701H24.3 | GABRD     | -0.244968235 | 2.02E-07    |
| RP11-701H24.3 | COL13A1   | -0.278132025 | 3.06E-09    |
| RP11-701H24.3 | S100A5    | -0.50177283  | 2.26E-29    |
| RP11-701H24.3 | MISP      | -0.378885467 | 1.96E-16    |
| RP11-701H24.3 | HES6      | -0.331795907 | 9.66E-13    |
| RP11-701H24.3 | PSD3      | 0.090389359  | 0.058445301 |
| RP11-701H24.3 | DOK7      | -0.3067024   | 5.14E-11    |
| RP11-701H24.3 | ZMAT3     | -0.097616701 | 0.04091895  |
| RP11-701H24.3 | MFAP2     | -0.332111638 | 9.17E-13    |
| RP11-701H24.3 | TMEM79    | -0.419053063 | 4.27E-20    |
| RP11-701H24.3 | SLC1A5    | -0.399674057 | 2.88E-18    |
| RP11-701H24.3 | BBC3      | -0.587662812 | 4.06E-42    |
| RP11-701H24.3 | HLA-DQB2  | -0.439490888 | 3.70E-22    |
| RP11-701H24.3 | C1QL1     | -0.232841818 | 8.11E-07    |
| RP11-701H24.3 | TMEM215   | -0.076611663 | 0.108940705 |
| RP11-701H24.3 | PNP       | -0.285097818 | 1.18E-09    |
| RP11-701H24.3 | ARNTL     | -0.114875942 | 0.01603875  |
| RP11-701H24.3 | CLDN2     | -0.237724591 | 4.68E-07    |
| RP11-701H24.3 | MVP       | -0.566296092 | 1.36E-38    |
| RP11-701H24.3 | LGALS1    | -0.618832789 | 9.39E-48    |
| RP11-701H24.3 | BIRC7     | -0.397195157 | 4.84E-18    |
| RP11-701H24.3 | COL8A1    | -0.09622896  | 0.043888853 |
| RP11-701H24.3 | PERP      | -0.308403177 | 3.97E-11    |
| RP11-701H24.3 | GJA4      | -0.238750211 | 4.16E-07    |
| RP11-701H24.3 | IGFL2     | -0.415974455 | 8.49E-20    |
| RP11-701H24.3 | DAPK2     | -0.166894364 | 0.000445562 |
| RP11-701H24.3 | MAMLD1    | -0.179196234 | 0.000160349 |
| RP11-701H24.3 | ETV5      | -0.077427376 | 0.10521269  |
| RP11-701H24.3 | RUNX1     | -0.271960666 | 6.98E-09    |
| RP11-701H24.3 | LONRF2    | 0.079198078  | 0.097467548 |
| RP11-701H24.3 | SPOCK1    | -0.03823378  | 0.424235403 |
| RP11-701H24.3 | XKRX      | -0.082529421 | 0.084131616 |
| RP11-701H24.3 | TGFB1     | -0.382495521 | 9.62E-17    |
| RP11-701H24.3 | ERP27     | -0.124429848 | 0.009059215 |
| RP11-701H24.3 | TNFRSF10C | -0.156876648 | 0.000973754 |
| RP11-701H24.3 | PALM      | -0.355693154 | 1.54E-14    |

|               |          |              |             |
|---------------|----------|--------------|-------------|
| RP11-701H24.3 | TSC22D1  | -0.128114934 | 0.007193807 |
| RP11-701H24.3 | TGM2     | -0.299012809 | 1.62E-10    |
| RP11-701H24.3 | UBE2QL1  | -0.194458967 | 4.10E-05    |
| RP11-701H24.3 | ECE1     | -0.21479013  | 5.61E-06    |
| RP11-701H24.3 | COL8A2   | -0.236620092 | 5.30E-07    |
| RP11-701H24.3 | HIST3H2A | -0.403897985 | 1.18E-18    |
| RP11-701H24.3 | TNFRSF21 | -0.16596405  | 0.000480023 |
| RP11-701H24.3 | SOX4     | -0.229948187 | 1.12E-06    |
| RP11-701H24.3 | ELF3     | -0.337051988 | 4.01E-13    |
| RP11-701H24.3 | TPD52L1  | -0.238184137 | 4.44E-07    |
| RP11-701H24.3 | INHBB    | -0.108689831 | 0.022752622 |
| RP11-701H24.3 | HPN      | -0.382274255 | 1.01E-16    |
| RP11-701H24.3 | MMP7     | -0.320042166 | 6.51E-12    |
| RP11-701H24.3 | RAB27A   | -0.083054504 | 0.082170672 |
| RP11-701H24.3 | IGF2BP2  | -0.131334225 | 0.005853834 |
| RP11-701H24.3 | ITGB4    | -0.319347093 | 7.27E-12    |
| RP11-701H24.3 | PPP1R1B  | -0.364049099 | 3.33E-15    |
| RP11-701H24.3 | NPDC1    | -0.559477952 | 1.60E-37    |
| RP11-701H24.3 | CCL13    | -0.38437444  | 6.62E-17    |
| RP11-701H24.3 | SPINT1   | -0.474367085 | 5.15E-26    |
| RP11-701H24.3 | HEY2     | -0.189288272 | 6.58E-05    |
| RP11-701H24.3 | CST2     | -0.380520947 | 1.42E-16    |
| RP11-701H24.3 | ADM      | -0.283044717 | 1.57E-09    |
| RP11-701H24.3 | VSTM2L   | -0.422104702 | 2.14E-20    |
| RP11-701H24.3 | FAM84A   | -0.365842069 | 2.38E-15    |
| RP11-701H24.3 | P4HA2    | -0.293456032 | 3.62E-10    |
| RP11-701H24.3 | LPL      | -0.175073153 | 0.000227592 |
| RP11-701H24.3 | TMEM173  | -0.442085809 | 1.98E-22    |
| RP11-701H24.3 | DHRS3    | -0.374604805 | 4.50E-16    |
| RP11-701H24.3 | SCN1B    | -0.539092465 | 1.84E-34    |
| RP11-701H24.3 | GLT1D1   | -0.124771819 | 0.008869582 |
| RP11-701H24.3 | PHYHIP   | -0.404646746 | 1.00E-18    |
| RP11-701H24.3 | BHLHE40  | -0.219759415 | 3.35E-06    |
| RP11-701H24.3 | BID      | -0.481261108 | 7.86E-27    |
| RP11-701H24.3 | POSTN    | -0.199762705 | 2.49E-05    |
| RP11-701H24.3 | ITGA3    | -0.313091907 | 1.94E-11    |
| RP11-701H24.3 | RSP04    | -0.22877604  | 1.27E-06    |
| RP11-701H24.3 | ADAMTS9  | 0.005900024  | 0.901894994 |
| RP11-701H24.3 | ABTB2    | -0.165042246 | 0.000516599 |
| RP11-701H24.3 | KCNQ3    | -0.141488105 | 0.002968196 |
| RP11-701H24.3 | ANXA1    | -0.176626702 | 0.000199639 |
| RP11-701H24.3 | S100A11  | -0.689644001 | 3.07E-63    |
| RP11-701H24.3 | CEACAM6  | -0.300039715 | 1.39E-10    |
| RP11-701H24.3 | IER5L    | -0.457135927 | 4.70E-24    |
| RP11-701H24.3 | KRT80    | -0.21290922  | 6.80E-06    |
| RP11-701H24.3 | CDH6     | -0.329604939 | 1.39E-12    |
| RP11-701H24.3 | UNC5B    | -0.186294787 | 8.62E-05    |
| RP11-701H24.3 | PLEKHN1  | -0.400752449 | 2.29E-18    |
| RP11-701H24.3 | SYTL1    | -0.62190315  | 2.41E-48    |
| RP11-701H24.3 | TMEM163  | -0.305175659 | 6.47E-11    |
| RP11-701H24.3 | C4orf48  | -0.546261086 | 1.63E-35    |

|               |            |              |             |
|---------------|------------|--------------|-------------|
| RP11-701H24.3 | B3GNT7     | -0.235333056 | 6.13E-07    |
| RP11-701H24.3 | BAIAP3     | -0.250981163 | 9.87E-08    |
| RP11-701H24.3 | PHLDA2     | -0.532780828 | 1.48E-33    |
| RP11-701H24.3 | GAP43      | -0.313066693 | 1.94E-11    |
| RP11-701H24.3 | S100A1     | -0.511903306 | 1.08E-30    |
| RP11-701H24.3 | PTPRE      | -0.14523177  | 0.00228494  |
| RP11-701H24.3 | CCND1      | -0.148411346 | 0.001820943 |
| RP11-701H24.3 | ST6GALNAC5 | -0.299706183 | 1.46E-10    |
| RP11-701H24.3 | KRT17      | -0.293207816 | 3.75E-10    |
| RP11-701H24.3 | HPCAL4     | -0.181655417 | 0.000129641 |
| RP11-701H24.3 | GABBR2     | -0.160147568 | 0.000758096 |
| RP11-701H24.3 | DIRAS3     | -0.227239937 | 1.50E-06    |
| RP11-701H24.3 | SERINC2    | -0.492764857 | 3.10E-28    |
| RP11-701H24.3 | PTCHD4     | -0.201067754 | 2.19E-05    |
| RP11-701H24.3 | EPS8       | 0.095157518  | 0.046304112 |
| RP11-701H24.3 | LY6E       | -0.494923627 | 1.67E-28    |
| RP11-701H24.3 | UPP1       | -0.467917581 | 2.87E-25    |
| RP11-701H24.3 | AHNAK2     | -0.247354513 | 1.52E-07    |
| RP11-701H24.3 | PLXNC1     | -0.151668225 | 0.001436579 |
| RP11-701H24.3 | TNC        | -0.226732725 | 1.59E-06    |
| RP11-701H24.3 | DUSP4      | -0.258519129 | 3.91E-08    |
| RP11-701H24.3 | NRCAM      | 0.042339699  | 0.376165892 |
| RP11-701H24.3 | NRP2       | -0.174502256 | 0.000238753 |
| RP11-701H24.3 | CTSC       | -0.391681926 | 1.51E-17    |
| RP11-701H24.3 | AMIGO2     | -0.181730165 | 0.0001288   |
| RP11-701H24.3 | NAB2       | -0.287467927 | 8.47E-10    |
| RP11-701H24.3 | TBC1D2     | -0.302632934 | 9.47E-11    |
| RP11-701H24.3 | PHLDA3     | -0.657155359 | 1.29E-55    |
| RP11-701H24.3 | PTP4A3     | -0.548302982 | 8.09E-36    |
| RP11-701H24.3 | CRABP2     | -0.482155395 | 6.14E-27    |
| RP11-701H24.3 | GOS2       | -0.410747754 | 2.68E-19    |
| RP11-701H24.3 | S100A6     | -0.633650719 | 1.16E-50    |
| RP11-701H24.3 | FOXQ1      | -0.184166937 | 0.000104041 |
| RP11-701H24.3 | LRG1       | -0.323534852 | 3.73E-12    |
| RP11-701H24.3 | LAMP5      | -0.379516929 | 1.73E-16    |
| RP11-701H24.3 | ALDH3B1    | -0.39057006  | 1.90E-17    |
| RP11-701H24.3 | CDH2       | -0.010845764 | 0.820732644 |
| RP11-701H24.3 | SCG5       | -0.330683757 | 1.16E-12    |
| RP11-701H24.3 | ZCCHC16    | -0.074374197 | 0.119702091 |
| RP11-701H24.3 | GRB7       | -0.345745081 | 9.01E-14    |
| RP11-701H24.3 | TIAM1      | -0.095774938 | 0.044899055 |
| RP11-701H24.3 | FXYD5      | -0.607366485 | 1.31E-45    |
| RP11-701H24.3 | CLDN9      | -0.380382139 | 1.46E-16    |
| RP11-701H24.3 | FAM43A     | -0.255479121 | 5.70E-08    |
| RP11-701H24.3 | CHST2      | -0.296108256 | 2.47E-10    |
| RP11-701H24.3 | HMGA2      | -0.296827657 | 2.22E-10    |
| RP11-701H24.3 | GALNT7     | -0.064975299 | 0.174166057 |
| RP11-701H24.3 | CBLN1      | -0.301383911 | 1.14E-10    |
| RP11-701H24.3 | STRA6      | -0.392272255 | 1.34E-17    |
| RP11-701H24.3 | MUC21      | -0.306376836 | 5.40E-11    |
| RP11-701H24.3 | PRR36      | -0.358423247 | 9.39E-15    |

|               |          |              |             |
|---------------|----------|--------------|-------------|
| RP11-701H24.3 | NFE2L3   | -0.397822082 | 4.24E-18    |
| RP11-701H24.3 | NR1D1    | -0.330084493 | 1.28E-12    |
| RP11-701H24.3 | MUC1     | -0.40129895  | 2.04E-18    |
| RP11-701H24.3 | NAT8L    | -0.157755616 | 0.000910826 |
| RP11-701H24.3 | APOC1    | -0.322229519 | 4.59E-12    |
| RP11-701H24.3 | EVA1A    | -0.334988107 | 5.67E-13    |
| RP11-701H24.3 | ENTPD1   | -0.056616092 | 0.236489682 |
| RP11-701H24.3 | COL1A1   | -0.332019301 | 9.31E-13    |
| RP11-701H24.3 | FNDC4    | -0.439188773 | 3.98E-22    |
| RP11-701H24.3 | FRMD3    | 0.017853399  | 0.709123531 |
| RP11-701H24.3 | SHROOM4  | -0.023886609 | 0.617691793 |
| RP11-701H24.3 | NELL2    | -0.071357855 | 0.135501643 |
| RP11-701H24.3 | EPHB3    | -0.392552101 | 1.26E-17    |
| RP11-701H24.3 | TMC6     | -0.43430842  | 1.27E-21    |
| RP11-701H24.3 | NOD1     | -0.116058443 | 0.014974789 |
| RP11-701H24.3 | GGCT     | -0.416197302 | 8.08E-20    |
| RP11-701H24.3 | ICAM1    | -0.215851218 | 5.03E-06    |
| RP11-701H24.3 | PRSS23   | -0.258570191 | 3.89E-08    |
| RP11-701H24.3 | CFI      | -0.307146778 | 4.81E-11    |
| RP11-701H24.3 | CD55     | -0.241912483 | 2.89E-07    |
| RP11-701H24.3 | RASD2    | -0.204146768 | 1.63E-05    |
| RP11-701H24.3 | KLK11    | -0.229161795 | 1.22E-06    |
| RP11-701H24.3 | ICAM5    | -0.235846793 | 5.79E-07    |
| RP11-701H24.3 | ADORA1   | -0.402005586 | 1.76E-18    |
| RP11-701H24.3 | ITGA2    | -0.149527751 | 0.001679688 |
| RP11-701H24.3 | ABCC3    | -0.092202896 | 0.053548486 |
| RP11-701H24.3 | MFGE8    | -0.349463924 | 4.69E-14    |
| RP11-701H24.3 | STK32A   | -0.110427059 | 0.020657374 |
| RP11-701H24.3 | CYSLTR2  | -0.089527836 | 0.060898255 |
| RP11-701H24.3 | LAD1     | -0.37264248  | 6.57E-16    |
| RP11-701H24.3 | MGAT3    | -0.177332344 | 0.000188035 |
| RP11-701H24.3 | IGFBP6   | -0.474571473 | 4.87E-26    |
| RP11-701H24.3 | CYP2S1   | -0.381867606 | 1.09E-16    |
| RP11-701H24.3 | KCNJ2    | -0.292347712 | 4.24E-10    |
| RP11-701H24.3 | FAM20A   | -0.408128579 | 4.74E-19    |
| RP11-701H24.3 | TGFA     | -0.122424971 | 0.010245282 |
| RP11-701H24.3 | MXRA8    | -0.459986724 | 2.27E-24    |
| RP11-701H24.3 | C8orf4   | -0.264909344 | 1.74E-08    |
| RP11-701H24.3 | CLDN10   | -0.339966554 | 2.44E-13    |
| RP11-701H24.3 | PDE5A    | 0.009923961  | 0.835742508 |
| RP11-701H24.3 | APOE     | -0.27668911  | 3.72E-09    |
| RP11-701H24.3 | SPOCK2   | -0.215691367 | 5.11E-06    |
| RP11-701H24.3 | TENM1    | -0.091274852 | 0.056009907 |
| RP11-701H24.3 | SLIT1    | -0.236843628 | 5.17E-07    |
| RP11-701H24.3 | CXCL14   | -0.263215093 | 2.17E-08    |
| RP11-701H24.3 | ECM1     | -0.346190593 | 8.34E-14    |
| RP11-701H24.3 | DUSP5    | -0.30019375  | 1.36E-10    |
| RP11-701H24.3 | SEZ6L2   | -0.408011704 | 4.86E-19    |
| RP11-701H24.3 | THRSP    | -0.249687177 | 1.15E-07    |
| RP11-701H24.3 | C19orf33 | -0.530492985 | 3.12E-33    |
| RP11-701H24.3 | MPZL2    | -0.218555212 | 3.80E-06    |

|               |           |              |             |
|---------------|-----------|--------------|-------------|
| RP11-701H24.3 | CTSH      | -0.404049609 | 1.14E-18    |
| RP11-701H24.3 | CYP1B1    | -0.140307022 | 0.003219514 |
| RP11-701H24.3 | ALOX5     | -0.358082411 | 9.99E-15    |
| RP11-701H24.3 | SYTL5     | -0.154280172 | 0.001183829 |
| RP11-701H24.3 | TNFRSF12A | -0.370443569 | 1.00E-15    |
| RP11-701H24.3 | DUSP6     | -0.219488647 | 3.44E-06    |
| RP11-701H24.3 | ALOX15B   | -0.356001509 | 1.46E-14    |
| RP11-701H24.3 | SDC4      | -0.253091283 | 7.64E-08    |
| RP11-701H24.3 | MDK       | -0.448805372 | 3.81E-23    |
| RP11-701H24.3 | KRT19     | -0.480353488 | 1.01E-26    |
| RP11-701H24.3 | MET       | -0.110480248 | 0.020595961 |
| RP11-701H24.3 | TESC      | -0.288407318 | 7.42E-10    |
| RP11-701H24.3 | CXCL17    | -0.375473645 | 3.81E-16    |
| RP11-701H24.3 | NPC2      | -0.518470819 | 1.43E-31    |
| RP11-701H24.3 | COMP      | -0.351204557 | 3.45E-14    |
| RP11-701H24.3 | TUSC3     | -0.2596005   | 3.42E-08    |
| RP11-701H24.3 | TMPRSS4   | -0.343698504 | 1.29E-13    |
| RP11-701H24.3 | LGALS3    | -0.488974669 | 9.11E-28    |
| RP11-701H24.3 | CRLF1     | -0.285983311 | 1.04E-09    |
| RP11-701H24.3 | CTXN1     | -0.469528574 | 1.88E-25    |
| RP11-701H24.3 | PCSK1N    | -0.405455079 | 8.43E-19    |
| RP11-701H24.3 | NMU       | -0.353360399 | 2.34E-14    |
| RP11-701H24.3 | GALE      | -0.565547756 | 1.79E-38    |
| RP11-701H24.3 | PCSK2     | -0.181507763 | 0.000131316 |
| RP11-701H24.3 | GJB3      | -0.337100638 | 3.98E-13    |
| RP11-701H24.3 | SLPI      | -0.425675467 | 9.49E-21    |
| RP11-701H24.3 | AGR2      | -0.213063114 | 6.69E-06    |
| RP11-701H24.3 | MRC2      | -0.329686922 | 1.37E-12    |
| RP11-701H24.3 | GOLT1A    | -0.495001496 | 1.63E-28    |
| RP11-701H24.3 | SLC27A6   | -0.121902162 | 0.010576384 |
| RP11-701H24.3 | KCNN4     | -0.510555848 | 1.63E-30    |
| RP11-701H24.3 | ETV4      | -0.324984799 | 2.95E-12    |
| RP11-701H24.3 | SYT12     | -0.31102448  | 2.66E-11    |
| RP11-701H24.3 | PVRL4     | -0.398677079 | 3.55E-18    |
| RP11-701H24.3 | PLCD3     | -0.271085527 | 7.83E-09    |
| RP11-701H24.3 | PLAU      | -0.433439948 | 1.56E-21    |
| RP11-701H24.3 | LRRK2     | -0.04345511  | 0.363709761 |
| RP11-701H24.3 | SFN       | -0.478666186 | 1.60E-26    |
| RP11-701H24.3 | LPAR5     | -0.182551406 | 0.000119896 |
| RP11-701H24.3 | NGEF      | -0.383970067 | 7.17E-17    |
| RP11-701H24.3 | DTX4      | -0.137407859 | 0.00392036  |
| RP11-701H24.3 | CST6      | -0.446562492 | 6.64E-23    |
| RP11-701H24.3 | QPCT      | -0.301908143 | 1.05E-10    |
| RP11-701H24.3 | TIMP1     | -0.538171939 | 2.50E-34    |
| RP11-701H24.3 | CAMK2N1   | -0.286277908 | 1.00E-09    |
| RP11-701H24.3 | KLHDC8A   | -0.267049108 | 1.32E-08    |
| RP11-701H24.3 | PDLIM4    | -0.473105012 | 7.23E-26    |
| RP11-701H24.3 | SCEL      | -0.15548366  | 0.001081748 |
| RP11-701H24.3 | LCN2      | -0.429749046 | 3.70E-21    |
| RP11-701H24.3 | PROS1     | -0.162119254 | 0.000650407 |
| RP11-701H24.3 | GABRB2    | -0.109984242 | 0.021174872 |

|               |          |              |             |
|---------------|----------|--------------|-------------|
| RP11-701H24.3 | TMPRSS6  | -0.355260691 | 1.67E-14    |
| RP11-701H24.3 | KLK7     | -0.214733821 | 5.64E-06    |
| RP11-701H24.3 | PDZK1IP1 | -0.494256281 | 2.02E-28    |
| RP11-701H24.3 | CDH3     | -0.271967048 | 6.97E-09    |
| RP11-701H24.3 | LRP4     | -0.08774139  | 0.066255904 |
| RP11-701H24.3 | IGSF1    | -0.204804753 | 1.53E-05    |
| RP11-701H24.3 | B3GNT3   | -0.353561191 | 2.26E-14    |
| RP11-701H24.3 | CLDN1    | -0.208521044 | 1.06E-05    |
| RP11-701H24.3 | GDF15    | -0.393631486 | 1.01E-17    |
| RP11-701H24.3 | ARHGAP36 | -0.199830645 | 2.47E-05    |
| RP11-701H24.3 | LAMB3    | -0.330713259 | 1.16E-12    |
| RP11-701H24.3 | KLK10    | -0.333976946 | 6.72E-13    |
| RP11-701H24.3 | DPP4     | -0.150981446 | 0.001510812 |
| RP11-701H24.3 | METTL7B  | -0.338668512 | 3.05E-13    |
| RP11-701H24.3 | LIPH     | -0.314710133 | 1.51E-11    |
| RP11-701H24.3 | CLDN16   | -0.157954047 | 0.000897149 |
| RP11-701H24.3 | CHI3L1   | -0.354441436 | 1.93E-14    |
| RP11-701H24.3 | SLC22A31 | -0.487105421 | 1.54E-27    |
| RP11-701H24.3 | TACSTD2  | -0.303642393 | 8.14E-11    |
| RP11-701H24.3 | SFTPB    | -0.383174924 | 8.40E-17    |
| RP11-701H24.3 | RXRG     | -0.272282495 | 6.69E-09    |
| RP11-701H24.3 | DCSTAMP  | -0.270083353 | 8.93E-09    |
| RP11-701H24.3 | CITED1   | -0.394990433 | 7.65E-18    |
| RP11-701H24.3 | SERPINA1 | -0.445156454 | 9.37E-23    |
| RP11-701H24.3 | PRR15    | -0.315698033 | 1.29E-11    |
| RP11-701H24.3 | SLC34A2  | -0.197995549 | 2.94E-05    |
| RP11-701H24.3 | FN1      | -0.271650041 | 7.27E-09    |
| RP11-701H24.3 | ZCCHC12  | -0.135174765 | 0.004551345 |
| RP11-757F18.5 | TFF3     | 0.5737346    | 0           |
| RP11-757F18.5 | CCL21    | 0.377101309  | 2.78E-16    |
| RP11-757F18.5 | TPO      | 0.620736589  | 0           |
| RP11-757F18.5 | MT1G     | 0.52723741   | 0           |
| RP11-757F18.5 | DIO1     | 0.567320016  | 0           |
| RP11-757F18.5 | DPT      | 0.323637698  | 3.66E-12    |
| RP11-757F18.5 | CDH16    | 0.530772133  | 0           |
| RP11-757F18.5 | CRABP1   | 0.416969123  | 6.80E-20    |
| RP11-757F18.5 | SLC26A7  | 0.509287921  | 0           |
| RP11-757F18.5 | MT1H     | 0.4926756    | 3.18E-28    |
| RP11-757F18.5 | SLC26A4  | 0.540217209  | 0           |
| RP11-757F18.5 | SLC5A8   | 0.542396521  | 6.06E-35    |
| RP11-757F18.5 | PKHD1L1  | 0.585885286  | 8.17E-42    |
| RP11-757F18.5 | TFCP2L1  | 0.57128408   | 0           |
| RP11-757F18.5 | WSCD2    | 0.542767106  | 5.35E-35    |
| RP11-757F18.5 | IPCEF1   | 0.539575113  | 0           |
| RP11-757F18.5 | SLC5A5   | 0.550853225  | 3.35E-36    |
| RP11-757F18.5 | MT1F     | 0.569614799  | 0           |
| RP11-757F18.5 | FOSB     | 0.439772975  | 0           |
| RP11-757F18.5 | SEMA3D   | 0.564775903  | 2.37E-38    |
| RP11-757F18.5 | BMP8A    | 0.524230463  | 0           |
| RP11-757F18.5 | MATN2    | 0.487021761  | 0           |
| RP11-757F18.5 | PLA2R1   | 0.526056048  | 0           |



|               |           |             |             |
|---------------|-----------|-------------|-------------|
| RP11-757F18.5 | COL23A1   | 0.50716235  | 0           |
| RP11-757F18.5 | HGD       | 0.602924398 | 0           |
| RP11-757F18.5 | TCEAL2    | 0.415484927 | 0           |
| RP11-757F18.5 | CHRDL1    | 0.375826356 | 3.56E-16    |
| RP11-757F18.5 | TNFRSF11B | 0.579102994 | 0           |
| RP11-757F18.5 | FAM167A   | 0.54315182  | 0           |
| RP11-757F18.5 | KIT       | 0.459812576 | 0           |
| RP11-757F18.5 | SLC4A4    | 0.532380424 | 0           |
| RP11-757F18.5 | SMOC2     | 0.41789091  | 0           |
| RP11-757F18.5 | FHL1      | 0.625029289 | 0           |
| RP11-757F18.5 | OTOS      | 0.537595208 | 0           |
| RP11-757F18.5 | IGFBPL1   | 0.455040105 | 8.01E-24    |
| RP11-757F18.5 | HBB       | 0.264495613 | 2.08E-08    |
| RP11-757F18.5 | BEX1      | 0.288223121 | 9.11E-10    |
| RP11-757F18.5 | FABP4     | 0.348025535 | 6.04E-14    |
| RP11-757F18.5 | LMOD1     | 0.481511672 | 0           |
| RP11-757F18.5 | SOD3      | 0.538520837 | 0           |
| RP11-757F18.5 | TMEM171   | 0.517028257 | 0           |
| RP11-757F18.5 | PI16      | 0.322660184 | 5.65E-12    |
| RP11-757F18.5 | ZMAT4     | 0.557204049 | 3.60E-37    |
| RP11-757F18.5 | MFAP4     | 0.196873342 | 3.39E-05    |
| RP11-757F18.5 | CWH43     | 0.563303988 | 4.04E-38    |
| RP11-757F18.5 | SPX       | 0.461266407 | 0           |
| RP11-757F18.5 | APOD      | 0.260842598 | 3.29E-08    |
| RP11-757F18.5 | DPP6      | 0.472864429 | 0           |
| RP11-757F18.5 | MMRN1     | 0.338857275 | 4.02E-13    |
| RP11-757F18.5 | WDR72     | 0.448026053 | 0           |
| RP11-757F18.5 | MPPED2    | 0.553797973 | 0           |
| RP11-757F18.5 | PAPSS2    | 0.43502441  | 0           |
| RP11-757F18.5 | DCN       | 0.208781988 | 1.08E-05    |
| RP11-757F18.5 | SORBS2    | 0.580236556 | 0           |
| RP11-757F18.5 | EGR2      | 0.318425211 | 1.10E-11    |
| RP11-757F18.5 | EDN3      | 0.323157218 | 3.96E-12    |
| RP11-757F18.5 | DIO2      | 0.38278849  | 7.39E-18    |
| RP11-757F18.5 | ITPR1     | 0.565398548 | 0           |
| RP11-757F18.5 | CFD       | 0.289686455 | 7.44E-10    |
| RP11-757F18.5 | CPXM1     | 0.370023006 | 1.08E-15    |
| RP11-757F18.5 | ELMO1     | 0.551135264 | 0           |
| RP11-757F18.5 | GPC3      | 0.445277903 | 9.09E-23    |
| RP11-757F18.5 | MYOC      | 0.174171455 | 0.000245453 |
| RP11-757F18.5 | DEPTOR    | 0.548109027 | 0           |
| RP11-757F18.5 | DGKI      | 0.640270966 | 0           |
| RP11-757F18.5 | CARTPT    | 0.516073968 | 3.00E-31    |
| RP11-757F18.5 | IYD       | 0.371306207 | 8.00E-16    |
| RP11-757F18.5 | LYVE1     | 0.397698976 | 0           |
| RP11-757F18.5 | CLCNKB    | 0.506318986 | 0           |
| RP11-757F18.5 | NCAM1     | 0.444531611 | 0           |
| RP11-757F18.5 | HBA2      | 0.284450963 | 1.53E-09    |
| RP11-757F18.5 | GLT8D2    | 0.447597988 | 0           |
| RP11-757F18.5 | OGDHL     | 0.407369432 | 0           |
| RP11-757F18.5 | LIFR      | 0.423744954 | 0           |

|               |            |             |             |
|---------------|------------|-------------|-------------|
| RP11-757F18.5 | CSGALNACT1 | 0.469841596 | 0           |
| RP11-757F18.5 | RAP1GAP    | 0.441259854 | 0           |
| RP11-757F18.5 | COL9A3     | 0.4555264   | 0           |
| RP11-757F18.5 | FBLN1      | 0.256098287 | 5.89E-08    |
| RP11-757F18.5 | EFEMP1     | 0.482916852 | 0           |
| RP11-757F18.5 | AOX1       | 0.450941247 | 2.24E-23    |
| RP11-757F18.5 | GRIN2C     | 0.536768156 | 0           |
| RP11-757F18.5 | C11orf74   | 0.500845775 | 0           |
| RP11-757F18.5 | PPARGC1A   | 0.561829359 | 0           |
| RP11-757F18.5 | ANGPTL1    | 0.427137131 | 0           |
| RP11-757F18.5 | SCARA5     | 0.293137856 | 3.79E-10    |
| RP11-757F18.5 | LTF        | 0.427736535 | 0           |
| RP11-757F18.5 | CA4        | 0.391544447 | 1.55E-17    |
| RP11-757F18.5 | TG         | 0.412269621 | 0           |
| RP11-757F18.5 | FCGBP      | 0.521071324 | 0           |
| RP11-757F18.5 | PBX4       | 0.593339045 | 0           |
| RP11-757F18.5 | CYR61      | 0.433838935 | 0           |
| RP11-757F18.5 | FOS        | 0.442608867 | 0           |
| RP11-757F18.5 | KHDRBS2    | 0.562953985 | 0           |
| RP11-757F18.5 | MUM1L1     | 0.428810951 | 0           |
| RP11-757F18.5 | RGS16      | 0.497602527 | 0           |
| RP11-757F18.5 | MT1M       | 0.49377023  | 0           |
| RP11-757F18.5 | LRP2       | 0.566152838 | 0           |
| RP11-757F18.5 | MAFB       | 0.509143956 | 0           |
| RP11-757F18.5 | KCNK2      | 0.49456934  | 0           |
| RP11-757F18.5 | TBC1D4     | 0.467205837 | 0           |
| RP11-757F18.5 | MIOX       | 0.554505051 | 9.34E-37    |
| RP11-757F18.5 | TPPP       | 0.535834868 | 0           |
| RP11-757F18.5 | FMOD       | 0.474835398 | 0           |
| RP11-757F18.5 | CITED2     | 0.526532621 | 0           |
| RP11-757F18.5 | RGS8       | 0.483419403 | 4.32E-27    |
| RP11-757F18.5 | ABI3BP     | 0.348751975 | 7.20E-14    |
| RP11-757F18.5 | ADH1B      | 0.328817561 | 1.58E-12    |
| RP11-757F18.5 | OGN        | 0.252320864 | 8.39E-08    |
| RP11-757F18.5 | NR4A1      | 0.493971638 | 0           |
| RP11-757F18.5 | FOXJ1      | 0.468060135 | 2.77E-25    |
| RP11-757F18.5 | ALDH1A1    | 0.412184377 | 0           |
| RP11-757F18.5 | OCA2       | 0.468027688 | 2.79E-25    |
| RP11-757F18.5 | TMEM139    | 0.444152055 | 0           |
| RP11-757F18.5 | ARHGAP24   | 0.480911701 | 0           |
| RP11-757F18.5 | SLC25A15   | 0.575733511 | 0           |
| RP11-757F18.5 | DES        | 0.258932628 | 3.71E-08    |
| RP11-757F18.5 | GDF10      | 0.415650056 | 9.12E-20    |
| RP11-757F18.5 | KIAA1324   | 0.427617392 | 0           |
| RP11-757F18.5 | JUN        | 0.448720204 | 0           |
| RP11-757F18.5 | C7         | 0.140201607 | 0.003267001 |
| RP11-757F18.5 | LGI3       | 0.528937044 | 0           |
| RP11-757F18.5 | CDON       | 0.513896351 | 0           |
| RP11-757F18.5 | BCL2       | 0.42850742  | 0           |
| RP11-757F18.5 | HLF        | 0.482340568 | 0           |
| RP11-757F18.5 | EGR1       | 0.341696712 | 2.48E-13    |

|               |          |             |             |
|---------------|----------|-------------|-------------|
| RP11-757F18.5 | IP6K3    | 0.435868908 | 0           |
| RP11-757F18.5 | SCUBE3   | 0.468818951 | 0           |
| RP11-757F18.5 | PKNOX2   | 0.426312064 | 0           |
| RP11-757F18.5 | SMAD9    | 0.478020067 | 0           |
| RP11-757F18.5 | IQGAP2   | 0.545490288 | 0           |
| RP11-757F18.5 | GNA14    | 0.602460732 | 0           |
| RP11-757F18.5 | LAYN     | 0.425945274 | 0           |
| RP11-757F18.5 | AVPR1A   | 0.428161621 | 0           |
| RP11-757F18.5 | PDLIM3   | 0.492829849 | 0           |
| RP11-757F18.5 | GPM6A    | 0.444622671 | 0           |
| RP11-757F18.5 | SDPR     | 0.315553009 | 1.71E-11    |
| RP11-757F18.5 | CRYAB    | 0.312868599 | 2.57E-11    |
| RP11-757F18.5 | FOXA2    | 0.568530732 | 5.98E-39    |
| RP11-757F18.5 | C8orf88  | 0.400043544 | 0           |
| RP11-757F18.5 | ISM1     | 0.460417086 | 0           |
| RP11-757F18.5 | BMP2     | 0.533982758 | 0           |
| RP11-757F18.5 | ID4      | 0.559978951 | 0           |
| RP11-757F18.5 | NUPR1    | 0.361625255 | 6.42E-15    |
| RP11-757F18.5 | SERTM1   | 0.502967367 | 1.59E-29    |
| RP11-757F18.5 | IRS1     | 0.361279314 | 6.88E-15    |
| RP11-757F18.5 | FIBIN    | 0.289819356 | 7.30E-10    |
| RP11-757F18.5 | PODN     | 0.251988415 | 9.67E-08    |
| RP11-757F18.5 | TDRD9    | 0.435576866 | 0           |
| RP11-757F18.5 | EPHA3    | 0.282381133 | 2.02E-09    |
| RP11-757F18.5 | AIF1L    | 0.423306677 | 0           |
| RP11-757F18.5 | EBF4     | 0.559381533 | 0           |
| RP11-757F18.5 | ADM2     | 0.546733349 | 0           |
| RP11-757F18.5 | GSTM3    | 0.435274469 | 0           |
| RP11-757F18.5 | HSD17B6  | 0.415387343 | 0           |
| RP11-757F18.5 | AGR3     | 0.512315623 | 9.54E-31    |
| RP11-757F18.5 | EPHB1    | 0.359446637 | 9.86E-15    |
| RP11-757F18.5 | TMOD1    | 0.446481021 | 0           |
| RP11-757F18.5 | WASF3    | 0.470313914 | 0           |
| RP11-757F18.5 | SELV     | 0.552495117 | 1.89E-36    |
| RP11-757F18.5 | ENPP1    | 0.296422868 | 2.88E-10    |
| RP11-757F18.5 | SYNE1    | 0.5229704   | 3.47E-32    |
| RP11-757F18.5 | PLCH1    | 0.524414284 | 0           |
| RP11-757F18.5 | CCDC146  | 0.578580466 | 0           |
| RP11-757F18.5 | SLC16A2  | 0.464083151 | 0           |
| RP11-757F18.5 | IER2     | 0.467665815 | 0           |
| RP11-757F18.5 | KCNAB1   | 0.390176928 | 0           |
| RP11-757F18.5 | SYNDIG1  | 0.475440759 | 0           |
| RP11-757F18.5 | C16orf89 | 0.416392543 | 0           |
| RP11-757F18.5 | CTGF     | 0.384188138 | 0           |
| RP11-757F18.5 | NR4A3    | 0.401538933 | 0           |
| RP11-757F18.5 | KIAA1456 | 0.53130232  | 0           |
| RP11-757F18.5 | AQP4     | 0.413006039 | 0           |
| RP11-757F18.5 | RNF150   | 0.453550042 | 0           |
| RP11-757F18.5 | C1S      | 0.167096764 | 0.000445884 |
| RP11-757F18.5 | PFKFB2   | 0.402061603 | 0           |
| RP11-757F18.5 | PROX1    | 0.490282171 | 0           |

|               |          |             |            |
|---------------|----------|-------------|------------|
| RP11-757F18.5 | TCF7L1   | 0.537103884 | 0          |
| RP11-757F18.5 | HSPB6    | 0.242807865 | 2.84E-07   |
| RP11-757F18.5 | FHDC1    | 0.335439    | 7.13E-13   |
| RP11-757F18.5 | PRR15L   | 0.316047311 | 1.58E-11   |
| RP11-757F18.5 | SLC1A1   | 0.452094225 | 0          |
| RP11-757F18.5 | BTBD11   | 0.399555057 | 0          |
| RP11-757F18.5 | TRIM58   | 0.385047813 | 0          |
| RP11-757F18.5 | LRIG1    | 0.48141196  | 0          |
| RP11-757F18.5 | ROR2     | 0.459490322 | 0          |
| RP11-757F18.5 | GPR125   | 0.554249157 | 0          |
| RP11-757F18.5 | FLRT1    | 0.561953608 | 0          |
| RP11-757F18.5 | PGF      | 0.561273641 | 0          |
| RP11-757F18.5 | DUSP1    | 0.43171535  | 0          |
| RP11-757F18.5 | PLA2G7   | 0.442734535 | 0          |
| RP11-757F18.5 | PLSCR4   | 0.380041246 | 5.72E-17   |
| RP11-757F18.5 | FAM46B   | 0.512716975 | 0          |
| RP11-757F18.5 | GLDC     | 0.522533381 | 0          |
| RP11-757F18.5 | ZBTB16   | 0.386349594 | 0          |
| RP11-757F18.5 | OMD      | 0.215900709 | 5.00E-06   |
| RP11-757F18.5 | HSD11B2  | 0.357404749 | 1.46E-14   |
| RP11-757F18.5 | FGL2     | 0.189749147 | 6.51E-05   |
| RP11-757F18.5 | CLCNKA   | 0.544688573 | 2.79E-35   |
| RP11-757F18.5 | GATM     | 0.27060312  | 9.58E-09   |
| RP11-757F18.5 | TNS3     | 0.394120142 | 0          |
| RP11-757F18.5 | TOB1     | 0.543765691 | 0          |
| RP11-757F18.5 | MARC2    | 0.507611122 | 0          |
| RP11-757F18.5 | LRRC2    | 0.506661381 | 0          |
| RP11-757F18.5 | SORD     | 0.248331712 | 1.49E-07   |
| RP11-757F18.5 | RIMS4    | 0.327149045 | 2.76E-12   |
| RP11-757F18.5 | SLC29A4  | 0.568044804 | 0          |
| RP11-757F18.5 | SLC39A14 | 0.475993498 | 0          |
| RP11-757F18.5 | FAXDC2   | 0.381933637 | 1.90E-17   |
| RP11-757F18.5 | HSPB8    | 0.472620186 | 0          |
| RP11-757F18.5 | CCL19    | 0.108527552 | 0.02295743 |
| RP11-757F18.5 | KCNIP3   | 0.541879541 | 0          |
| RP11-757F18.5 | CGNL1    | 0.43753053  | 0          |
| RP11-757F18.5 | ATF3     | 0.37303818  | 5.23E-16   |
| RP11-757F18.5 | SGCD     | 0.441343538 | 0          |
| RP11-757F18.5 | STARD13  | 0.535340849 | 0          |
| RP11-757F18.5 | LDHD     | 0.37220049  | 6.44E-16   |
| RP11-757F18.5 | RCAN1    | 0.483329882 | 0          |
| RP11-757F18.5 | ID3      | 0.563467861 | 0          |
| RP11-757F18.5 | SYTL3    | 0.459576985 | 0          |
| RP11-757F18.5 | MT1E     | 0.405992619 | 0          |
| RP11-757F18.5 | CAMK1D   | 0.391715435 | 0          |
| RP11-757F18.5 | PRKCQ    | 0.32960765  | 1.86E-12   |
| RP11-757F18.5 | NUAK2    | 0.487981856 | 0          |
| RP11-757F18.5 | LIPG     | 0.341839401 | 2.42E-13   |
| RP11-757F18.5 | SLC25A25 | 0.475182473 | 0          |
| RP11-757F18.5 | PRKX     | 0.322772802 | 5.55E-12   |
| RP11-757F18.5 | SRPX     | 0.220006269 | 3.45E-06   |

|               |          |             |             |
|---------------|----------|-------------|-------------|
| RP11-757F18.5 | FAM189A1 | 0.363334251 | 4.55E-15    |
| RP11-757F18.5 | PLEKHH1  | 0.544701248 | 0           |
| RP11-757F18.5 | WNT11    | 0.49070442  | 0           |
| RP11-757F18.5 | SNAI1    | 0.510778771 | 0           |
| RP11-757F18.5 | FDCSP    | 0.103851638 | 0.029584031 |
| RP11-757F18.5 | MT1X     | 0.318570452 | 1.07E-11    |
| RP11-757F18.5 | ACACB    | 0.528014535 | 0           |
| RP11-757F18.5 | ARC      | 0.209211471 | 1.03E-05    |
| RP11-757F18.5 | KLK4     | 0.298354038 | 1.78E-10    |
| RP11-757F18.5 | ZFPM2    | 0.355607247 | 2.05E-14    |
| RP11-757F18.5 | AKAP12   | 0.314840277 | 1.90E-11    |
| RP11-757F18.5 | GJB6     | 0.523431852 | 3.00E-32    |
| RP11-757F18.5 | ERO1LB   | 0.550396293 | 0           |
| RP11-757F18.5 | DNALI1   | 0.565514145 | 0           |
| RP11-757F18.5 | HKDC1    | 0.437393799 | 0           |
| RP11-757F18.5 | ZFP36L2  | 0.429136609 | 0           |
| RP11-757F18.5 | CAPSL    | 0.41398679  | 1.32E-19    |
| RP11-757F18.5 | CYP7B1   | 0.37162917  | 7.40E-16    |
| RP11-757F18.5 | CPQ      | 0.49035933  | 0           |
| RP11-757F18.5 | RPS6KA6  | 0.446281685 | 7.11E-23    |
| RP11-757F18.5 | TLE1     | 0.527446761 | 0           |
| RP11-757F18.5 | TP53INP2 | 0.567420578 | 0           |
| RP11-757F18.5 | KATNAL2  | 0.535776005 | 0           |
| RP11-757F18.5 | SGPP2    | 0.279227952 | 3.09E-09    |
| RP11-757F18.5 | CTH      | 0.463487718 | 0           |
| RP11-757F18.5 | KIF12    | 0.538858977 | 0           |
| RP11-757F18.5 | TMEM220  | 0.436293711 | 0           |
| RP11-757F18.5 | CENPJ    | 0.621461518 | 0           |
| RP11-757F18.5 | FAM155B  | 0.252675332 | 8.91E-08    |
| RP11-757F18.5 | WFS1     | 0.527689445 | 0           |
| RP11-757F18.5 | SELENBP1 | 0.368573289 | 1.50E-15    |
| RP11-757F18.5 | SNTA1    | 0.42797709  | 0           |
| RP11-757F18.5 | FRAS1    | 0.391574874 | 0           |
| RP11-757F18.5 | FBLN7    | 0.488859403 | 0           |
| RP11-757F18.5 | AGPAT9   | 0.438658561 | 0           |
| RP11-757F18.5 | GPR83    | 0.321305072 | 6.99E-12    |
| RP11-757F18.5 | PRTG     | 0.407409997 | 0           |
| RP11-757F18.5 | EGR3     | 0.246547542 | 1.84E-07    |
| RP11-757F18.5 | GRAMD2   | 0.555538173 | 0           |
| RP11-757F18.5 | HYOU1    | 0.477462789 | 0           |
| RP11-757F18.5 | FBLN5    | 0.333808299 | 9.34E-13    |
| RP11-757F18.5 | ITM2A    | 0.37462477  | 3.46E-16    |
| RP11-757F18.5 | SRF      | 0.508940278 | 0           |
| RP11-757F18.5 | FGFR2    | 0.307862316 | 5.45E-11    |
| RP11-757F18.5 | MT1A     | 0.35912475  | 8.26E-15    |
| RP11-757F18.5 | MAMDC2   | 0.339697944 | 3.48E-13    |
| RP11-757F18.5 | FHL2     | 0.378215377 | 1.17E-16    |
| RP11-757F18.5 | FTCDNL1  | 0.319877197 | 8.74E-12    |
| RP11-757F18.5 | PKIA     | 0.194222832 | 4.33E-05    |
| RP11-757F18.5 | DNAJB4   | 0.429281425 | 0           |
| RP11-757F18.5 | SLC25A33 | 0.531478198 | 0           |

|               |          |             |             |
|---------------|----------|-------------|-------------|
| RP11-757F18.5 | EYA2     | 0.340084024 | 3.26E-13    |
| RP11-757F18.5 | LPAR1    | 0.401692968 | 0           |
| RP11-757F18.5 | STX11    | 0.34177217  | 2.44E-13    |
| RP11-757F18.5 | ARHGEF28 | 0.495228883 | 0           |
| RP11-757F18.5 | OR2W3    | 0.383070887 | 4.15E-18    |
| RP11-757F18.5 | ALDH1B1  | 0.336846249 | 4.15E-13    |
| RP11-757F18.5 | CXCL12   | 0.194247511 | 4.32E-05    |
| RP11-757F18.5 | OLFM2    | 0.396314078 | 0           |
| RP11-757F18.5 | TUB      | 0.3656496   | 2.82E-15    |
| RP11-757F18.5 | HTRA3    | 0.330096563 | 1.72E-12    |
| RP11-757F18.5 | CKB      | 0.537393658 | 0           |
| RP11-757F18.5 | RGS2     | 0.274244221 | 5.97E-09    |
| RP11-757F18.5 | SHANK2   | 0.486850138 | 0           |
| RP11-757F18.5 | CNTFR    | 0.341788883 | 1.79E-13    |
| RP11-757F18.5 | CYTH3    | 0.384326855 | 0           |
| RP11-757F18.5 | PLAC9    | 0.277861493 | 3.71E-09    |
| RP11-757F18.5 | WWOX     | 0.411102018 | 0           |
| RP11-757F18.5 | NPR3     | 0.46363296  | 0           |
| RP11-757F18.5 | SDC2     | 0.418977666 | 0           |
| RP11-757F18.5 | KLF15    | 0.364828363 | 3.35E-15    |
| RP11-757F18.5 | TMEM164  | 0.522410409 | 0           |
| RP11-757F18.5 | LONRF3   | 0.238023273 | 4.90E-07    |
| RP11-757F18.5 | GBP1     | 0.254122638 | 7.49E-08    |
| RP11-757F18.5 | ARHGAP6  | 0.527172023 | 0           |
| RP11-757F18.5 | TMEM119  | 0.150298851 | 0.001604637 |
| RP11-757F18.5 | SH3RF1   | 0.409306076 | 0           |
| RP11-757F18.5 | CRELD2   | 0.510232272 | 0           |
| RP11-757F18.5 | PCP4     | 0.171610305 | 0.000309466 |
| RP11-757F18.5 | GCSH     | 0.431548833 | 0           |
| RP11-757F18.5 | IMPA2    | 0.440882284 | 0           |
| RP11-757F18.5 | C1R      | 0.141939821 | 0.002899649 |
| RP11-757F18.5 | SUCNR1   | 0.245366748 | 2.11E-07    |
| RP11-757F18.5 | SFRP1    | 0.31308561  | 2.49E-11    |
| RP11-757F18.5 | UGT8     | 0.405477466 | 0           |
| RP11-757F18.5 | TLE4     | 0.270807791 | 9.33E-09    |
| RP11-757F18.5 | ANTXR1   | 0.348264906 | 7.85E-14    |
| RP11-757F18.5 | GPX3     | 0.453125381 | 0           |
| RP11-757F18.5 | DPY19L2  | 0.656025951 | 0           |
| RP11-757F18.5 | FAM46C   | 0.280024226 | 2.78E-09    |
| RP11-757F18.5 | IL33     | 0.27045569  | 8.50E-09    |
| RP11-757F18.5 | PEG3     | 0.423356888 | 0           |
| RP11-757F18.5 | FAHD2A   | 0.606890164 | 0           |
| RP11-757F18.5 | PTGDS    | 0.05437837  | 0.255450349 |
| RP11-757F18.5 | CHCHD10  | 0.358592635 | 1.16E-14    |
| RP11-757F18.5 | CD36     | 0.313327584 | 2.40E-11    |
| RP11-757F18.5 | ANKRD37  | 0.579346244 | 0           |
| RP11-757F18.5 | TSPAN33  | 0.331968671 | 1.26E-12    |
| RP11-757F18.5 | PRDM16   | 0.421960927 | 0           |
| RP11-757F18.5 | UST      | 0.361985663 | 5.98E-15    |
| RP11-757F18.5 | NEXN     | 0.469480621 | 0           |
| RP11-757F18.5 | NUPR1L   | 0.210853452 | 8.37E-06    |

|               |          |             |             |
|---------------|----------|-------------|-------------|
| RP11-757F18.5 | SLC24A3  | 0.457189299 | 0           |
| RP11-757F18.5 | MARC1    | 0.473407665 | 0           |
| RP11-757F18.5 | MYH11    | 0.25885702  | 4.20E-08    |
| RP11-757F18.5 | APOA1    | 0.466758996 | 3.90E-25    |
| RP11-757F18.5 | TMEM178B | 0.508663128 | 0           |
| RP11-757F18.5 | CAPN6    | 0.353196692 | 2.41E-14    |
| RP11-757F18.5 | PPM1L    | 0.46603639  | 0           |
| RP11-757F18.5 | FZD8     | 0.524010757 | 0           |
| RP11-757F18.5 | RCAN2    | 0.460837066 | 0           |
| RP11-757F18.5 | COPZ2    | 0.438167521 | 0           |
| RP11-757F18.5 | GAS1     | 0.27801567  | 3.63E-09    |
| RP11-757F18.5 | DACT1    | 0.426056758 | 0           |
| RP11-757F18.5 | WBSCR17  | 0.451648289 | 0           |
| RP11-757F18.5 | NCS1     | 0.416739335 | 0           |
| RP11-757F18.5 | SPIRE2   | 0.543921144 | 0           |
| RP11-757F18.5 | C15orf52 | 0.546304434 | 0           |
| RP11-757F18.5 | SPAG5    | 0.51312036  | 0           |
| RP11-757F18.5 | ARL4D    | 0.459061549 | 0           |
| RP11-757F18.5 | FAM189A2 | 0.353883642 | 2.83E-14    |
| RP11-757F18.5 | MAP1LC3A | 0.470550782 | 0           |
| RP11-757F18.5 | KLF6     | 0.294320132 | 3.89E-10    |
| RP11-757F18.5 | ADD3     | 0.303140416 | 1.09E-10    |
| RP11-757F18.5 | TSPAN7   | 0.267238034 | 1.47E-08    |
| RP11-757F18.5 | KLF9     | 0.316404315 | 1.50E-11    |
| RP11-757F18.5 | KCNQ1    | 0.39119858  | 0           |
| RP11-757F18.5 | MAN1A1   | 0.23451564  | 7.25E-07    |
| RP11-757F18.5 | MLF1     | 0.347298712 | 9.32E-14    |
| RP11-757F18.5 | RARB     | 0.440372096 | 0           |
| RP11-757F18.5 | CDC42EP2 | 0.390229407 | 0           |
| RP11-757F18.5 | FAM3B    | 0.245297957 | 2.13E-07    |
| RP11-757F18.5 | GADD45B  | 0.371922205 | 6.90E-16    |
| RP11-757F18.5 | TMEM47   | 0.338945781 | 3.96E-13    |
| RP11-757F18.5 | SDF2L1   | 0.420920693 | 0           |
| RP11-757F18.5 | CCDC85A  | 0.444196734 | 0           |
| RP11-757F18.5 | CRYBG3   | 0.276874732 | 4.22E-09    |
| RP11-757F18.5 | FBLN2    | 0.159788322 | 0.000790264 |
| RP11-757F18.5 | PEBP4    | 0.173979836 | 0.000254551 |
| RP11-757F18.5 | CDADC1   | 0.487893775 | 0           |
| RP11-757F18.5 | FAM63A   | 0.332924086 | 1.08E-12    |
| RP11-757F18.5 | GLUL     | 0.418934406 | 0           |
| RP11-757F18.5 | FREM2    | 0.388449493 | 0           |
| RP11-757F18.5 | ACKR3    | 0.464187117 | 0           |
| RP11-757F18.5 | DENND6A  | 0.522152123 | 0           |
| RP11-757F18.5 | CLDN8    | 0.264606388 | 2.06E-08    |
| RP11-757F18.5 | UTS2R    | 0.296194612 | 2.44E-10    |
| RP11-757F18.5 | SCNN1B   | 0.312978807 | 2.53E-11    |
| RP11-757F18.5 | TTC30A   | 0.439179954 | 0           |
| RP11-757F18.5 | CORO2B   | 0.423301571 | 0           |
| RP11-757F18.5 | TC2N     | 0.437921292 | 0           |
| RP11-757F18.5 | ALDH2    | 0.406618121 | 0           |
| RP11-757F18.5 | GPR183   | 0.216659622 | 4.88E-06    |

|               |          |              |             |
|---------------|----------|--------------|-------------|
| RP11-757F18.5 | C4orf47  | 0.517706522  | 0           |
| RP11-757F18.5 | SLC25A42 | 0.425454517  | 0           |
| RP11-757F18.5 | LGMN     | 0.413130856  | 0           |
| RP11-757F18.5 | ACSF2    | 0.456746625  | 0           |
| RP11-757F18.5 | KIAA1467 | 0.395796798  | 0           |
| RP11-757F18.5 | PRKG1    | 0.418099127  | 0           |
| RP11-757F18.5 | GNAI1    | 0.518694559  | 0           |
| RP11-757F18.5 | ABCC4    | 0.335001574  | 7.67E-13    |
| RP11-757F18.5 | PRPS1    | 0.374460239  | 3.62E-16    |
| RP11-757F18.5 | TSPAN5   | 0.410646862  | 0           |
| RP11-757F18.5 | CR2      | 0.155094103  | 0.001113867 |
| RP11-757F18.5 | CCDC170  | 0.403851304  | 0           |
| RP11-757F18.5 | RRAD     | 0.275144887  | 5.30E-09    |
| RP11-757F18.5 | SCGB2A1  | 0.331905979  | 1.28E-12    |
| RP11-757F18.5 | SESN3    | 0.284364868  | 1.55E-09    |
| RP11-757F18.5 | SGK223   | 0.298602479  | 2.11E-10    |
| RP11-757F18.5 | NDRG2    | 0.40709058   | 0           |
| RP11-757F18.5 | C3orf52  | 0.825768544  | 0           |
| RP11-757F18.5 | FLRT3    | -0.12385275  | 0.009424256 |
| RP11-757F18.5 | MST1R    | -0.289498946 | 7.64E-10    |
| RP11-757F18.5 | SDC1     | -0.150466219 | 0.001585253 |
| RP11-757F18.5 | ST8SIA4  | -0.397200277 | 0           |
| RP11-757F18.5 | UBTD1    | -0.387370396 | 0           |
| RP11-757F18.5 | EPHA2    | -0.09461104  | 0.047607288 |
| RP11-757F18.5 | TMEM130  | -0.298359654 | 2.19E-10    |
| RP11-757F18.5 | SPINK2   | -0.358678447 | 1.14E-14    |
| RP11-757F18.5 | MMP16    | -0.282794021 | 1.91E-09    |
| RP11-757F18.5 | SIGLEC15 | -0.343394503 | 1.85E-13    |
| RP11-757F18.5 | RIN1     | -0.438052775 | 0           |
| RP11-757F18.5 | IL1RN    | -0.217671914 | 4.40E-06    |
| RP11-757F18.5 | FCER1G   | -0.248829702 | 1.41E-07    |
| RP11-757F18.5 | CD276    | -0.44925805  | 0           |
| RP11-757F18.5 | CTSB     | -0.474712993 | 0           |
| RP11-757F18.5 | FAM171A2 | -0.35843321  | 1.20E-14    |
| RP11-757F18.5 | ASPHD1   | -0.467557735 | 0           |
| RP11-757F18.5 | C15orf48 | -0.249543994 | 1.29E-07    |
| RP11-757F18.5 | DYSF     | -0.297247792 | 2.56E-10    |
| RP11-757F18.5 | PDZRN4   | -0.21790481  | 4.29E-06    |
| RP11-757F18.5 | EFHD2    | -0.103930874 | 0.029498748 |
| RP11-757F18.5 | ASF1B    | -0.350293177 | 5.46E-14    |
| RP11-757F18.5 | AQP1     | -0.189054003 | 6.93E-05    |
| RP11-757F18.5 | ARRDC2   | -0.247295733 | 1.69E-07    |
| RP11-757F18.5 | PRSS1    | -0.400823463 | 2.26E-18    |
| RP11-757F18.5 | MAPK13   | -0.405169112 | 0           |
| RP11-757F18.5 | CST5     | -0.27528246  | 4.49E-09    |
| RP11-757F18.5 | AHR      | -0.262907463 | 2.54E-08    |
| RP11-757F18.5 | BAX      | -0.253091198 | 8.47E-08    |
| RP11-757F18.5 | C1orf115 | -0.374080824 | 4.00E-16    |
| RP11-757F18.5 | PLK3     | -0.082355035 | 0.084790838 |
| RP11-757F18.5 | JAG2     | -0.162681658 | 0.000631818 |
| RP11-757F18.5 | RAD23B   | -0.51923964  | 0           |



|               |          |              |             |
|---------------|----------|--------------|-------------|
| RP11-757F18.5 | CA12     | 0.008600011  | 0.857347551 |
| RP11-757F18.5 | ADTRP    | -0.400220273 | 0           |
| RP11-757F18.5 | UCP2     | -0.325884993 | 3.39E-12    |
| RP11-757F18.5 | IGFBP2   | -0.137840586 | 0.003833718 |
| RP11-757F18.5 | LOXL2    | -0.203457422 | 1.81E-05    |
| RP11-757F18.5 | GPX1     | -0.300268214 | 1.66E-10    |
| RP11-757F18.5 | P3H3     | -0.382377729 | 1.26E-17    |
| RP11-757F18.5 | C2orf81  | -0.475538059 | 0           |
| RP11-757F18.5 | CDT1     | -0.418336562 | 0           |
| RP11-757F18.5 | SNX25    | -0.174671151 | 0.000240336 |
| RP11-757F18.5 | MTHFD1L  | -0.304149871 | 9.43E-11    |
| RP11-757F18.5 | CDC42BPG | -0.350827278 | 3.68E-14    |
| RP11-757F18.5 | MSN      | -0.481841585 | 0           |
| RP11-757F18.5 | SIGLEC6  | -0.425231885 | 1.05E-20    |
| RP11-757F18.5 | F2R      | -0.025073117 | 0.600195495 |
| RP11-757F18.5 | TMEM184A | -0.284673221 | 1.48E-09    |
| RP11-757F18.5 | CKS2     | -0.175703016 | 0.000220494 |
| RP11-757F18.5 | TAX1BP3  | -0.370750489 | 9.12E-16    |
| RP11-757F18.5 | PMEPA1   | -0.338296876 | 4.42E-13    |
| RP11-757F18.5 | CXCL16   | -0.377948439 | 1.28E-16    |
| RP11-757F18.5 | FAXC     | -0.287760448 | 9.71E-10    |
| RP11-757F18.5 | VTCN1    | -0.272257858 | 6.71E-09    |
| RP11-757F18.5 | SH2D4A   | -0.422856061 | 0           |
| RP11-757F18.5 | RNF24    | -0.374926883 | 3.19E-16    |
| RP11-757F18.5 | LY6G6C   | -0.347027004 | 7.20E-14    |
| RP11-757F18.5 | NID1     | -0.210716221 | 8.90E-06    |
| RP11-757F18.5 | STAC     | -0.414967363 | 0           |
| RP11-757F18.5 | RAB34    | -0.487214659 | 0           |
| RP11-757F18.5 | HES4     | -0.060085471 | 0.208855476 |
| RP11-757F18.5 | EPHA10   | -0.540640168 | 0           |
| RP11-757F18.5 | ENTPD2   | -0.470804812 | 0           |
| RP11-757F18.5 | DDB2     | -0.377502645 | 1.49E-16    |
| RP11-757F18.5 | NKAIN4   | -0.036357963 | 0.447186198 |
| RP11-757F18.5 | TRIM29   | -0.20971017  | 9.84E-06    |
| RP11-757F18.5 | ADCY8    | -0.522919558 | 3.53E-32    |
| RP11-757F18.5 | SFTA2    | -0.208664972 | 1.09E-05    |
| RP11-757F18.5 | NRIP1    | -0.449357336 | 0           |
| RP11-757F18.5 | VWA1     | -0.164061308 | 0.000567142 |
| RP11-757F18.5 | APLNR    | -0.23149607  | 1.01E-06    |
| RP11-757F18.5 | REN      | -0.548847963 | 6.70E-36    |
| RP11-757F18.5 | EDIL3    | -0.236698514 | 5.68E-07    |
| RP11-757F18.5 | AGRN     | -0.280133015 | 2.74E-09    |
| RP11-757F18.5 | TREM1    | -0.216844152 | 4.79E-06    |
| RP11-757F18.5 | SRL      | -0.144736424 | 0.002386837 |
| RP11-757F18.5 | RASGRF1  | -0.424635266 | 0           |
| RP11-757F18.5 | RMI2     | -0.481847542 | 0           |
| RP11-757F18.5 | SAMD1    | -0.401186184 | 0           |
| RP11-757F18.5 | MGAT4B   | -0.474510591 | 0           |
| RP11-757F18.5 | NXN      | -0.319109008 | 9.85E-12    |
| RP11-757F18.5 | SH3BGRL3 | -0.418249049 | 0           |
| RP11-757F18.5 | CA11     | -0.425918183 | 0           |

|               |          |              |             |
|---------------|----------|--------------|-------------|
| RP11-757F18.5 | PLD3     | -0.33700474  | 5.49E-13    |
| RP11-757F18.5 | LURAP1L  | -0.306649467 | 6.53E-11    |
| RP11-757F18.5 | CARNS1   | -0.274912416 | 5.47E-09    |
| RP11-757F18.5 | PDLIM7   | -0.331965834 | 1.27E-12    |
| RP11-757F18.5 | BCL2L1   | -0.353458557 | 3.06E-14    |
| RP11-757F18.5 | GGT6     | -0.31950757  | 9.26E-12    |
| RP11-757F18.5 | DPYSL3   | -0.121580945 | 0.010822714 |
| RP11-757F18.5 | FYN      | -0.402714337 | 0           |
| RP11-757F18.5 | TK1      | -0.307106182 | 6.10E-11    |
| RP11-757F18.5 | AK1      | -0.253482669 | 8.09E-08    |
| RP11-757F18.5 | HIGD1B   | -0.182591903 | 0.000122534 |
| RP11-757F18.5 | TMEM59L  | -0.170349799 | 0.000343007 |
| RP11-757F18.5 | MEGF9    | -0.338690616 | 4.13E-13    |
| RP11-757F18.5 | ZFP36L1  | -0.166436654 | 0.000469992 |
| RP11-757F18.5 | ADRA1B   | -0.280541222 | 2.59E-09    |
| RP11-757F18.5 | EPHA4    | -0.229742112 | 1.23E-06    |
| RP11-757F18.5 | TCERG1L  | -0.058917442 | 0.217853373 |
| RP11-757F18.5 | NGFR     | -0.370976152 | 8.65E-16    |
| RP11-757F18.5 | EBI3     | -0.407220928 | 0           |
| RP11-757F18.5 | S100A10  | -0.164342287 | 0.000554747 |
| RP11-757F18.5 | S100B    | -0.288075043 | 9.30E-10    |
| RP11-757F18.5 | CD44     | -0.37380949  | 4.30E-16    |
| RP11-757F18.5 | BHLHE41  | -0.443976603 | 0           |
| RP11-757F18.5 | FBXO2    | -0.346657182 | 1.04E-13    |
| RP11-757F18.5 | SLC30A2  | -0.111291938 | 0.019719797 |
| RP11-757F18.5 | FRMD5    | -0.352009548 | 4.00E-14    |
| RP11-757F18.5 | SAMD11   | -0.215818812 | 5.32E-06    |
| RP11-757F18.5 | SIPA1L2  | -0.351174837 | 4.65E-14    |
| RP11-757F18.5 | S100A16  | -0.315548186 | 1.71E-11    |
| RP11-757F18.5 | PPL      | -0.342820063 | 2.04E-13    |
| RP11-757F18.5 | ARHGD1B  | -0.129016331 | 0.006826532 |
| RP11-757F18.5 | CDC42EP3 | -0.284531952 | 1.51E-09    |
| RP11-757F18.5 | RUNX2    | -0.472706848 | 0           |
| RP11-757F18.5 | LAMC2    | -0.292784887 | 4.83E-10    |
| RP11-757F18.5 | BRINP1   | -0.500197437 | 0           |
| RP11-757F18.5 | GPRC5B   | -0.529664101 | 0           |
| RP11-757F18.5 | AQP5     | -0.080108193 | 0.093659611 |
| RP11-757F18.5 | PLAG1    | -0.365777679 | 2.74E-15    |
| RP11-757F18.5 | PTPRU    | -0.297177725 | 2.59E-10    |
| RP11-757F18.5 | ANGPTL4  | -0.193022606 | 4.83E-05    |
| RP11-757F18.5 | PALM3    | -0.364683122 | 3.45E-15    |
| RP11-757F18.5 | ACP5     | -0.294374172 | 3.86E-10    |
| RP11-757F18.5 | DLG4     | -0.375899744 | 2.43E-16    |
| RP11-757F18.5 | ETNK2    | -0.530752985 | 0           |
| RP11-757F18.5 | CD109    | -0.325692378 | 3.49E-12    |
| RP11-757F18.5 | SNX22    | -0.154858347 | 0.00114736  |
| RP11-757F18.5 | TMEM98   | -0.403527206 | 0           |
| RP11-757F18.5 | CTHRC1   | -0.226119024 | 1.81E-06    |
| RP11-757F18.5 | S100A2   | -0.157122635 | 0.000968053 |
| RP11-757F18.5 | C11orf80 | -0.447734152 | 0           |
| RP11-757F18.5 | SREBF1   | -0.237768108 | 5.04E-07    |

|               |          |              |             |
|---------------|----------|--------------|-------------|
| RP11-757F18.5 | PRSS22   | -0.307333689 | 5.90E-11    |
| RP11-757F18.5 | CMTM3    | -0.345722618 | 1.23E-13    |
| RP11-757F18.5 | RDH5     | -0.479894303 | 0           |
| RP11-757F18.5 | MYH10    | -0.347454023 | 9.07E-14    |
| RP11-757F18.5 | EVPL     | -0.305274356 | 8.00E-11    |
| RP11-757F18.5 | SCD      | -0.348318237 | 7.78E-14    |
| RP11-757F18.5 | CD151    | -0.375262753 | 2.91E-16    |
| RP11-757F18.5 | S100A4   | -0.258228965 | 4.54E-08    |
| RP11-757F18.5 | BNIP1    | -0.368136998 | 1.65E-15    |
| RP11-757F18.5 | MAP3K6   | -0.347160704 | 9.55E-14    |
| RP11-757F18.5 | MANEAL   | -0.4839412   | 0           |
| RP11-757F18.5 | CD207    | -0.318344589 | 8.52E-12    |
| RP11-757F18.5 | CD1A     | -0.309793452 | 3.22E-11    |
| RP11-757F18.5 | C3       | -0.273001444 | 7.02E-09    |
| RP11-757F18.5 | NT5E     | -0.219477926 | 3.65E-06    |
| RP11-757F18.5 | CACNG4   | -0.289806229 | 6.09E-10    |
| RP11-757F18.5 | FHOD1    | -0.289565751 | 7.57E-10    |
| RP11-757F18.5 | LEMD1    | -0.452490944 | 0           |
| RP11-757F18.5 | ATP11A   | -0.183085922 | 0.000117383 |
| RP11-757F18.5 | PPAP2C   | -0.28435267  | 1.55E-09    |
| RP11-757F18.5 | DRAM1    | -0.316018093 | 1.59E-11    |
| RP11-757F18.5 | CDA      | -0.213003345 | 7.08E-06    |
| RP11-757F18.5 | CCND2    | -0.363457649 | 4.44E-15    |
| RP11-757F18.5 | LCN6     | -0.254975088 | 6.06E-08    |
| RP11-757F18.5 | CDH4     | -0.42016541  | 0           |
| RP11-757F18.5 | MMP11    | -0.327152591 | 2.76E-12    |
| RP11-757F18.5 | B3GAT1   | -0.273206399 | 6.83E-09    |
| RP11-757F18.5 | SPP1     | -0.204580914 | 1.63E-05    |
| RP11-757F18.5 | HLA-DQB1 | -0.276026972 | 4.72E-09    |
| RP11-757F18.5 | SDC3     | -0.438871033 | 0           |
| RP11-757F18.5 | CX3CL1   | -0.152969219 | 0.001319874 |
| RP11-757F18.5 | SDK1     | -0.318051328 | 1.16E-11    |
| RP11-757F18.5 | DOCK9    | -0.412609037 | 0           |
| RP11-757F18.5 | CSF2     | -0.347357256 | 6.80E-14    |
| RP11-757F18.5 | GRHL3    | -0.309228633 | 4.44E-11    |
| RP11-757F18.5 | TMEM92   | -0.420765217 | 2.90E-20    |
| RP11-757F18.5 | BASP1    | -0.351467447 | 4.41E-14    |
| RP11-757F18.5 | HRH1     | -0.328912365 | 2.08E-12    |
| RP11-757F18.5 | ESM1     | 0.008866806  | 0.852971595 |
| RP11-757F18.5 | B4GALNT3 | -0.369439914 | 1.23E-15    |
| RP11-757F18.5 | LMO3     | -0.104481344 | 0.028645303 |
| RP11-757F18.5 | C9orf16  | -0.385323687 | 0           |
| RP11-757F18.5 | SEMA3F   | -0.232551196 | 9.01E-07    |
| RP11-757F18.5 | PLA2G12B | -0.420519489 | 3.07E-20    |
| RP11-757F18.5 | KLK6     | -0.414659373 | 1.14E-19    |
| RP11-757F18.5 | ST3GAL5  | -0.296895611 | 2.70E-10    |
| RP11-757F18.5 | FAM132B  | -0.237973771 | 4.93E-07    |
| RP11-757F18.5 | CDKN1A   | -0.03105141  | 0.51625489  |
| RP11-757F18.5 | E2F1     | -0.358860849 | 1.11E-14    |
| RP11-757F18.5 | B3GNT8   | -0.312516843 | 2.71E-11    |
| RP11-757F18.5 | MTMR11   | -0.369135389 | 1.32E-15    |

|               |          |              |             |
|---------------|----------|--------------|-------------|
| RP11-757F18.5 | MYO1G    | -0.175562739 | 0.000223099 |
| RP11-757F18.5 | TMSB10   | -0.328773506 | 2.13E-12    |
| RP11-757F18.5 | UNC5CL   | -0.339599367 | 3.54E-13    |
| RP11-757F18.5 | ABR      | -0.361023014 | 7.24E-15    |
| RP11-757F18.5 | PLP2     | -0.421615553 | 0           |
| RP11-757F18.5 | SRCIN1   | -0.474173302 | 0           |
| RP11-757F18.5 | PDE9A    | -0.338736004 | 4.10E-13    |
| RP11-757F18.5 | TREM2    | -0.275130136 | 5.31E-09    |
| RP11-757F18.5 | KDELR3   | -0.225398066 | 1.96E-06    |
| RP11-757F18.5 | PC       | -0.5177712   | 0           |
| RP11-757F18.5 | C2CD4A   | -0.394031494 | 0           |
| RP11-757F18.5 | PELI1    | -0.160426164 | 0.000752464 |
| RP11-757F18.5 | SSX1     | -0.11918021  | 0.012497595 |
| RP11-757F18.5 | MROH6    | -0.38712204  | 0           |
| RP11-757F18.5 | ESPN     | -0.477773412 | 0           |
| RP11-757F18.5 | BMP1     | -0.297301974 | 2.54E-10    |
| RP11-757F18.5 | TM4SF4   | -0.324367707 | 3.26E-12    |
| RP11-757F18.5 | CORO2A   | -0.477132876 | 0           |
| RP11-757F18.5 | CD164L2  | -0.405538825 | 8.28E-19    |
| RP11-757F18.5 | CTSS     | -0.314525399 | 2.00E-11    |
| RP11-757F18.5 | CLU      | -0.365434717 | 2.95E-15    |
| RP11-757F18.5 | TMSB4X   | -0.299102596 | 1.96E-10    |
| RP11-757F18.5 | WNT10A   | -0.315243319 | 1.39E-11    |
| RP11-757F18.5 | NAPSA    | -0.15404945  | 0.001218511 |
| RP11-757F18.5 | PLEKHA4  | -0.476170511 | 0           |
| RP11-757F18.5 | SFTPA1   | -0.042412331 | 0.37534688  |
| RP11-757F18.5 | C1orf116 | -0.32026498  | 8.23E-12    |
| RP11-757F18.5 | TM4SF1   | -0.127947021 | 0.007304644 |
| RP11-757F18.5 | SEL1L3   | -0.326043992 | 3.30E-12    |
| RP11-757F18.5 | VASN     | -0.419840462 | 0           |
| RP11-757F18.5 | NPTXR    | -0.498142785 | 0           |
| RP11-757F18.5 | PDE4C    | -0.257186604 | 5.16E-08    |
| RP11-757F18.5 | CDC42EP1 | -0.353286792 | 3.16E-14    |
| RP11-757F18.5 | ENDOD1   | -0.537492518 | 0           |
| RP11-757F18.5 | RYR1     | -0.427163513 | 0           |
| RP11-757F18.5 | IL1RAP   | -0.374708454 | 3.38E-16    |
| RP11-757F18.5 | SLC35F2  | -0.492773912 | 3.09E-28    |
| RP11-757F18.5 | ISYNA1   | -0.348071866 | 8.13E-14    |
| RP11-757F18.5 | HLA-G    | -0.265225081 | 1.90E-08    |
| RP11-757F18.5 | CDKN2B   | -0.277783057 | 3.74E-09    |
| RP11-757F18.5 | ALDH1A3  | -0.134094668 | 0.004917384 |
| RP11-757F18.5 | CLIP3    | -0.443667398 | 0           |
| RP11-757F18.5 | ULBP2    | -0.381056658 | 3.43E-17    |
| RP11-757F18.5 | ETHE1    | -0.431038219 | 0           |
| RP11-757F18.5 | XPR1     | -0.329520704 | 1.89E-12    |
| RP11-757F18.5 | SPTBN2   | -0.522964566 | 0           |
| RP11-757F18.5 | IVL      | -0.337143855 | 3.95E-13    |
| RP11-757F18.5 | MARCO    | -0.239446183 | 4.17E-07    |
| RP11-757F18.5 | PLXND1   | -0.300302964 | 1.65E-10    |
| RP11-757F18.5 | EMILIN2  | -0.336640219 | 5.83E-13    |
| RP11-757F18.5 | PLAUR    | -0.238229787 | 4.78E-07    |

|               |          |              |             |
|---------------|----------|--------------|-------------|
| RP11-757F18.5 | CDC42EP5 | -0.389708014 | 0           |
| RP11-757F18.5 | TRPC5    | -0.409082059 | 3.86E-19    |
| RP11-757F18.5 | TMEM100  | -0.25735695  | 5.05E-08    |
| RP11-757F18.5 | QSOX1    | -0.467823679 | 0           |
| RP11-757F18.5 | ARHGAP23 | -0.302788944 | 1.15E-10    |
| RP11-757F18.5 | MDF1     | -0.122718337 | 0.010101096 |
| RP11-757F18.5 | FSTL3    | -0.290458049 | 6.68E-10    |
| RP11-757F18.5 | INF2     | -0.501897923 | 0           |
| RP11-757F18.5 | TGFBR1   | -0.538878692 | 0           |
| RP11-757F18.5 | TGFBI    | -0.318223944 | 1.13E-11    |
| RP11-757F18.5 | ERBB3    | -0.489396823 | 0           |
| RP11-757F18.5 | CCL18    | -0.145610566 | 0.002244425 |
| RP11-757F18.5 | CCL17    | -0.233621011 | 7.44E-07    |
| RP11-757F18.5 | C16orf45 | -0.416169007 | 0           |
| RP11-757F18.5 | PRDM1    | -0.278056236 | 3.61E-09    |
| RP11-757F18.5 | TRIM47   | -0.396179617 | 0           |
| RP11-757F18.5 | CNFN     | -0.349375917 | 6.44E-14    |
| RP11-757F18.5 | ARMCX3   | -0.469993929 | 0           |
| RP11-757F18.5 | RAMP1    | -0.409353166 | 0           |
| RP11-757F18.5 | GABRD    | -0.11926205  | 0.012436931 |
| RP11-757F18.5 | COL13A1  | -0.224328472 | 2.19E-06    |
| RP11-757F18.5 | S100A5   | -0.425822443 | 0           |
| RP11-757F18.5 | MISP     | -0.22899846  | 1.33E-06    |
| RP11-757F18.5 | HES6     | -0.242805312 | 2.84E-07    |
| RP11-757F18.5 | PSD3     | -0.418999084 | 0           |
| RP11-757F18.5 | DOK7     | -0.342819637 | 2.04E-13    |
| RP11-757F18.5 | ZMAT3    | -0.354058953 | 2.74E-14    |
| RP11-757F18.5 | MFAP2    | -0.352680154 | 3.54E-14    |
| RP11-757F18.5 | TMEM79   | -0.538485094 | 0           |
| RP11-757F18.5 | SLC1A5   | -0.401373267 | 0           |
| RP11-757F18.5 | BBC3     | -0.365857108 | 2.70E-15    |
| RP11-757F18.5 | HLA-DQB2 | -0.286682912 | 1.13E-09    |
| RP11-757F18.5 | C1QL1    | -0.44335564  | 0           |
| RP11-757F18.5 | TMEM215  | -0.301981107 | 1.04E-10    |
| RP11-757F18.5 | PNP      | -0.359454863 | 9.85E-15    |
| RP11-757F18.5 | ARNTL    | -0.388440557 | 0           |
| RP11-757F18.5 | CLDN2    | -0.432117261 | 2.13E-21    |
| RP11-757F18.5 | MVP      | -0.408366831 | 0           |
| RP11-757F18.5 | LGALS1   | -0.315101399 | 1.83E-11    |
| RP11-757F18.5 | BIRC7    | -0.307643112 | 4.46E-11    |
| RP11-757F18.5 | COL8A1   | -0.464303424 | 0           |
| RP11-757F18.5 | PERP     | -0.33155706  | 1.35E-12    |
| RP11-757F18.5 | GJA4     | -0.263268864 | 2.43E-08    |
| RP11-757F18.5 | IGFL2    | -0.379733242 | 1.66E-16    |
| RP11-757F18.5 | DAPK2    | -0.346610944 | 1.05E-13    |
| RP11-757F18.5 | MAMLD1   | -0.480034296 | 0           |
| RP11-757F18.5 | ETV5     | -0.373037045 | 5.24E-16    |
| RP11-757F18.5 | RUNX1    | -0.35884241  | 1.11E-14    |
| RP11-757F18.5 | LONRF2   | -0.293925116 | 4.11E-10    |
| RP11-757F18.5 | SPOCK1   | -0.184684994 | 0.000102071 |
| RP11-757F18.5 | XKRX     | -0.316202481 | 1.54E-11    |

|               |           |              |             |
|---------------|-----------|--------------|-------------|
| RP11-757F18.5 | TGFB1     | -0.320004142 | 8.57E-12    |
| RP11-757F18.5 | ERP27     | -0.19536533  | 3.90E-05    |
| RP11-757F18.5 | TNFRSF10C | -0.303764216 | 9.98E-11    |
| RP11-757F18.5 | PALM      | -0.423956575 | 0           |
| RP11-757F18.5 | TSC22D1   | -0.393812071 | 0           |
| RP11-757F18.5 | TGM2      | -0.262227921 | 2.77E-08    |
| RP11-757F18.5 | UBE2QL1   | -0.433096844 | 0           |
| RP11-757F18.5 | ECE1      | -0.430758375 | 0           |
| RP11-757F18.5 | COL8A2    | -0.287365858 | 1.03E-09    |
| RP11-757F18.5 | HIST3H2A  | -0.307218801 | 6.00E-11    |
| RP11-757F18.5 | TNFRSF21  | -0.258501008 | 4.39E-08    |
| RP11-757F18.5 | SOX4      | -0.343649384 | 1.77E-13    |
| RP11-757F18.5 | ELF3      | -0.27500929  | 5.40E-09    |
| RP11-757F18.5 | TPD52L1   | -0.46435023  | 0           |
| RP11-757F18.5 | INHBB     | -0.360053841 | 8.76E-15    |
| RP11-757F18.5 | HPN       | -0.322466718 | 5.82E-12    |
| RP11-757F18.5 | MMP7      | -0.211041589 | 8.21E-06    |
| RP11-757F18.5 | RAB27A    | -0.422664581 | 0           |
| RP11-757F18.5 | IGF2BP2   | -0.416713946 | 0           |
| RP11-757F18.5 | ITGB4     | -0.281071835 | 2.41E-09    |
| RP11-757F18.5 | PPP1R1B   | -0.431363168 | 0           |
| RP11-757F18.5 | NPDC1     | -0.296751079 | 2.75E-10    |
| RP11-757F18.5 | CCL13     | -0.337333638 | 3.82E-13    |
| RP11-757F18.5 | SPINT1    | -0.514774039 | 0           |
| RP11-757F18.5 | HEY2      | -0.386386188 | 0           |
| RP11-757F18.5 | CST2      | -0.270699852 | 8.23E-09    |
| RP11-757F18.5 | ADM       | -0.346178057 | 1.14E-13    |
| RP11-757F18.5 | VSTM2L    | -0.173851616 | 0.000257273 |
| RP11-757F18.5 | FAM84A    | -0.252803695 | 8.77E-08    |
| RP11-757F18.5 | P4HA2     | -0.520283986 | 0           |
| RP11-757F18.5 | LPL       | -0.270810628 | 9.32E-09    |
| RP11-757F18.5 | TMEM173   | -0.255273221 | 6.51E-08    |
| RP11-757F18.5 | DHRS3     | -0.44965718  | 0           |
| RP11-757F18.5 | SCN1B     | -0.409508619 | 0           |
| RP11-757F18.5 | GLT1D1    | -0.306372459 | 6.80E-11    |
| RP11-757F18.5 | PHYHIP    | -0.38428785  | 0           |
| RP11-757F18.5 | BHLHE40   | -0.192944028 | 4.87E-05    |
| RP11-757F18.5 | BID       | -0.46588973  | 0           |
| RP11-757F18.5 | POSTN     | -0.206002831 | 1.42E-05    |
| RP11-757F18.5 | ITGA3     | -0.479975008 | 0           |
| RP11-757F18.5 | RSP04     | -0.459735559 | 0           |
| RP11-757F18.5 | ADAMTS9   | -0.262277848 | 2.75E-08    |
| RP11-757F18.5 | ABTB2     | -0.45847179  | 0           |
| RP11-757F18.5 | KCNQ3     | -0.404818917 | 0           |
| RP11-757F18.5 | ANXA1     | -0.33205973  | 1.25E-12    |
| RP11-757F18.5 | S100A11   | -0.362589889 | 5.29E-15    |
| RP11-757F18.5 | CEACAM6   | -0.198446026 | 2.82E-05    |
| RP11-757F18.5 | IER5L     | -0.391841954 | 0           |
| RP11-757F18.5 | KRT80     | -0.280599659 | 2.57E-09    |
| RP11-757F18.5 | CDH6      | -0.287982991 | 9.42E-10    |
| RP11-757F18.5 | UNC5B     | -0.422975771 | 0           |

|               |            |              |             |
|---------------|------------|--------------|-------------|
| RP11-757F18.5 | PLEKHN1    | -0.354461629 | 2.54E-14    |
| RP11-757F18.5 | SYTL1      | -0.252346695 | 9.27E-08    |
| RP11-757F18.5 | TMEM163    | -0.285150503 | 1.39E-09    |
| RP11-757F18.5 | C4orf48    | -0.207820474 | 1.19E-05    |
| RP11-757F18.5 | B3GNT7     | -0.3851827   | 0           |
| RP11-757F18.5 | BAIAP3     | -0.460111995 | 0           |
| RP11-757F18.5 | PHLDA2     | -0.319094824 | 9.87E-12    |
| RP11-757F18.5 | GAP43      | -0.443399379 | 1.44E-22    |
| RP11-757F18.5 | S100A1     | -0.350706916 | 5.07E-14    |
| RP11-757F18.5 | PTPRE      | -0.428899883 | 0           |
| RP11-757F18.5 | CCND1      | -0.360646721 | 7.80E-15    |
| RP11-757F18.5 | ST6GALNAC5 | -0.323380237 | 3.82E-12    |
| RP11-757F18.5 | KRT17      | -0.029244973 | 0.540965979 |
| RP11-757F18.5 | HPCAL4     | -0.452692778 | 0           |
| RP11-757F18.5 | GABBR2     | -0.361899142 | 6.08E-15    |
| RP11-757F18.5 | DIRAS3     | -0.42512276  | 0           |
| RP11-757F18.5 | SERINC2    | -0.362191894 | 5.74E-15    |
| RP11-757F18.5 | PTCHD4     | -0.219700894 | 3.56E-06    |
| RP11-757F18.5 | EPS8       | -0.459498123 | 0           |
| RP11-757F18.5 | LY6E       | -0.488371199 | 0           |
| RP11-757F18.5 | UPP1       | -0.300280838 | 1.66E-10    |
| RP11-757F18.5 | AHNAK2     | -0.348157536 | 8.00E-14    |
| RP11-757F18.5 | PLXNC1     | -0.494661392 | 0           |
| RP11-757F18.5 | TNC        | -0.310227308 | 3.83E-11    |
| RP11-757F18.5 | DUSP4      | -0.312126649 | 2.87E-11    |
| RP11-757F18.5 | NRCAM      | -0.488970887 | 0           |
| RP11-757F18.5 | NRP2       | -0.438484243 | 0           |
| RP11-757F18.5 | CTSC       | -0.386462497 | 0           |
| RP11-757F18.5 | AMIGO2     | -0.317379446 | 1.29E-11    |
| RP11-757F18.5 | NAB2       | -0.358779293 | 1.12E-14    |
| RP11-757F18.5 | TBC1D2     | -0.397431613 | 0           |
| RP11-757F18.5 | PHLDA3     | -0.362259551 | 5.66E-15    |
| RP11-757F18.5 | PTP4A3     | -0.302781001 | 1.15E-10    |
| RP11-757F18.5 | CRABP2     | -0.356363239 | 1.78E-14    |
| RP11-757F18.5 | GOS2       | -0.405363571 | 0           |
| RP11-757F18.5 | S100A6     | -0.371859513 | 7.00E-16    |
| RP11-757F18.5 | FOXQ1      | -0.217287535 | 4.57E-06    |
| RP11-757F18.5 | LRG1       | -0.440422164 | 0           |
| RP11-757F18.5 | LAMP5      | -0.30923998  | 4.44E-11    |
| RP11-757F18.5 | ALDH3B1    | -0.358150671 | 1.27E-14    |
| RP11-757F18.5 | CDH2       | -0.172178505 | 0.000295372 |
| RP11-757F18.5 | SCG5       | -0.365994122 | 2.62E-15    |
| RP11-757F18.5 | ZCCHC16    | -0.418737633 | 4.58E-20    |
| RP11-757F18.5 | GRB7       | -0.407037817 | 0           |
| RP11-757F18.5 | TIAM1      | -0.32637192  | 3.13E-12    |
| RP11-757F18.5 | FXYD5      | -0.344435729 | 1.54E-13    |
| RP11-757F18.5 | CLDN9      | -0.396254932 | 0           |
| RP11-757F18.5 | FAM43A     | -0.492763044 | 0           |
| RP11-757F18.5 | CHST2      | -0.371330035 | 7.95E-16    |
| RP11-757F18.5 | HMGA2      | -0.441895001 | 0           |
| RP11-757F18.5 | GALNT7     | -0.492721628 | 0           |

|               |         |              |             |
|---------------|---------|--------------|-------------|
| RP11-757F18.5 | CBLN1   | -0.220254768 | 3.36E-06    |
| RP11-757F18.5 | STRA6   | -0.381263599 | 3.04E-17    |
| RP11-757F18.5 | MUC21   | -0.345720603 | 9.05E-14    |
| RP11-757F18.5 | PRR36   | -0.424210038 | 0           |
| RP11-757F18.5 | NFE2L3  | -0.300653302 | 1.57E-10    |
| RP11-757F18.5 | NR1D1   | -0.221430881 | 2.98E-06    |
| RP11-757F18.5 | MUC1    | -0.29561936  | 3.23E-10    |
| RP11-757F18.5 | NAT8L   | -0.38730813  | 0           |
| RP11-757F18.5 | APOC1   | -0.218616549 | 3.99E-06    |
| RP11-757F18.5 | EVA1A   | -0.354202492 | 2.67E-14    |
| RP11-757F18.5 | ENTPD1  | -0.187314654 | 8.09E-05    |
| RP11-757F18.5 | COL1A1  | -0.263618492 | 2.33E-08    |
| RP11-757F18.5 | FNDC4   | -0.261991337 | 2.85E-08    |
| RP11-757F18.5 | FRMD3   | -0.329317026 | 1.95E-12    |
| RP11-757F18.5 | SHROOM4 | -0.428704431 | 0           |
| RP11-757F18.5 | NELL2   | -0.288330776 | 8.98E-10    |
| RP11-757F18.5 | EPHB3   | -0.483501079 | 0           |
| RP11-757F18.5 | TMC6    | -0.427977374 | 0           |
| RP11-757F18.5 | NOD1    | -0.430671854 | 0           |
| RP11-757F18.5 | GGCT    | -0.553981368 | 0           |
| RP11-757F18.5 | ICAM1   | -0.347915703 | 8.36E-14    |
| RP11-757F18.5 | PRSS23  | -0.234858035 | 6.98E-07    |
| RP11-757F18.5 | CFI     | -0.326481702 | 3.08E-12    |
| RP11-757F18.5 | CD55    | -0.256971153 | 5.30E-08    |
| RP11-757F18.5 | RASD2   | -0.428084461 | 0           |
| RP11-757F18.5 | KLK11   | -0.382666544 | 9.30E-17    |
| RP11-757F18.5 | ICAM5   | -0.261094217 | 3.19E-08    |
| RP11-757F18.5 | ADORA1  | -0.530680506 | 0           |
| RP11-757F18.5 | ITGA2   | -0.372595648 | 5.85E-16    |
| RP11-757F18.5 | ABCC3   | -0.310692818 | 3.57E-11    |
| RP11-757F18.5 | MFGE8   | -0.462166222 | 0           |
| RP11-757F18.5 | STK32A  | -0.277717954 | 3.78E-09    |
| RP11-757F18.5 | CYSLTR2 | -0.276481418 | 4.45E-09    |
| RP11-757F18.5 | LAD1    | -0.517926653 | 0           |
| RP11-757F18.5 | MGAT3   | -0.273118601 | 6.91E-09    |
| RP11-757F18.5 | IGFBP6  | -0.358284849 | 1.23E-14    |
| RP11-757F18.5 | CYP2S1  | -0.361114499 | 7.11E-15    |
| RP11-757F18.5 | KCNJ2   | -0.359677973 | 9.43E-15    |
| RP11-757F18.5 | FAM20A  | -0.29046585  | 6.68E-10    |
| RP11-757F18.5 | TGFA    | -0.483100389 | 0           |
| RP11-757F18.5 | MXRA8   | -0.426146257 | 0           |
| RP11-757F18.5 | C8orf4  | -0.05355685  | 0.262709041 |
| RP11-757F18.5 | CLDN10  | -0.378531531 | 2.10E-16    |
| RP11-757F18.5 | PDE5A   | -0.493260609 | 0           |
| RP11-757F18.5 | APOE    | -0.252120607 | 9.52E-08    |
| RP11-757F18.5 | SPOCK2  | -0.243731366 | 2.55E-07    |
| RP11-757F18.5 | TENM1   | -0.227731145 | 1.52E-06    |
| RP11-757F18.5 | SLIT1   | -0.277769157 | 3.75E-09    |
| RP11-757F18.5 | CXCL14  | -0.116131137 | 0.014952163 |
| RP11-757F18.5 | ECM1    | -0.206131052 | 1.40E-05    |
| RP11-757F18.5 | DUSP5   | -0.249729517 | 1.27E-07    |



|               |           |              |             |
|---------------|-----------|--------------|-------------|
| RP11-757F18.5 | SEZ6L2    | -0.430608878 | 0           |
| RP11-757F18.5 | THRSP     | -0.302809226 | 1.15E-10    |
| RP11-757F18.5 | C19orf33  | -0.249051393 | 1.37E-07    |
| RP11-757F18.5 | MPZL2     | -0.323281998 | 5.12E-12    |
| RP11-757F18.5 | CTSH      | -0.55738475  | 0           |
| RP11-757F18.5 | CYP1B1    | -0.537757895 | 0           |
| RP11-757F18.5 | ALOX5     | -0.272216375 | 7.77E-09    |
| RP11-757F18.5 | SYTL5     | -0.395745397 | 6.54E-18    |
| RP11-757F18.5 | TNFRSF12A | -0.296500027 | 2.85E-10    |
| RP11-757F18.5 | DUSP6     | -0.252753626 | 8.83E-08    |
| RP11-757F18.5 | ALOX15B   | -0.322573238 | 5.73E-12    |
| RP11-757F18.5 | SDC4      | -0.467799283 | 0           |
| RP11-757F18.5 | MDK       | -0.388674731 | 0           |
| RP11-757F18.5 | KRT19     | -0.326106968 | 3.27E-12    |
| RP11-757F18.5 | MET       | -0.450350763 | 0           |
| RP11-757F18.5 | TESC      | -0.304133843 | 9.46E-11    |
| RP11-757F18.5 | CXCL17    | -0.452133246 | 1.66E-23    |
| RP11-757F18.5 | NPC2      | -0.515867036 | 0           |
| RP11-757F18.5 | COMP      | -0.283805604 | 1.67E-09    |
| RP11-757F18.5 | TUSC3     | -0.394002275 | 0           |
| RP11-757F18.5 | TMPRSS4   | -0.344343677 | 1.57E-13    |
| RP11-757F18.5 | LGALS3    | -0.379080583 | 8.53E-17    |
| RP11-757F18.5 | CRLF1     | -0.203882933 | 1.74E-05    |
| RP11-757F18.5 | CTXN1     | -0.388042421 | 0           |
| RP11-757F18.5 | PCSK1N    | -0.164627663 | 0.000542417 |
| RP11-757F18.5 | NMU       | -0.285848383 | 1.06E-09    |
| RP11-757F18.5 | GALE      | -0.444353606 | 0           |
| RP11-757F18.5 | PCSK2     | -0.093700162 | 0.049794868 |
| RP11-757F18.5 | GJB3      | -0.559395717 | 0           |
| RP11-757F18.5 | SLPI      | -0.175686704 | 0.000220796 |
| RP11-757F18.5 | AGR2      | -0.119287439 | 0.012418164 |
| RP11-757F18.5 | MRC2      | -0.385369216 | 0           |
| RP11-757F18.5 | GOLT1A    | -0.499832349 | 0           |
| RP11-757F18.5 | SLC27A6   | -0.268583014 | 1.09E-08    |
| RP11-757F18.5 | KCNN4     | -0.386351722 | 0           |
| RP11-757F18.5 | ETV4      | -0.309810034 | 3.21E-11    |
| RP11-757F18.5 | SYT12     | -0.543725551 | 0           |
| RP11-757F18.5 | PVRL4     | -0.538332052 | 0           |
| RP11-757F18.5 | PLCD3     | -0.472168151 | 0           |
| RP11-757F18.5 | PLAU      | -0.37383573  | 4.27E-16    |
| RP11-757F18.5 | LRRK2     | -0.243920293 | 2.50E-07    |
| RP11-757F18.5 | SFN       | -0.297820105 | 2.36E-10    |
| RP11-757F18.5 | LPAR5     | -0.457815084 | 0           |
| RP11-757F18.5 | NGEF      | -0.455190813 | 0           |
| RP11-757F18.5 | DTX4      | -0.471388188 | 0           |
| RP11-757F18.5 | CST6      | -0.408366972 | 0           |
| RP11-757F18.5 | QPCT      | -0.498779208 | 0           |
| RP11-757F18.5 | TIMP1     | -0.50045629  | 0           |
| RP11-757F18.5 | CAMK2N1   | -0.50806798  | 0           |
| RP11-757F18.5 | KLHDC8A   | -0.221884051 | 2.84E-06    |
| RP11-757F18.5 | PDLIM4    | -0.477633986 | 0           |

|               |          |              |             |
|---------------|----------|--------------|-------------|
| RP11-757F18.5 | SCEL     | -0.248837219 | 1.41E-07    |
| RP11-757F18.5 | LCN2     | -0.396765404 | 0           |
| RP11-757F18.5 | PROS1    | -0.516552535 | 0           |
| RP11-757F18.5 | GABRB2   | -0.460404888 | 0           |
| RP11-757F18.5 | TMPRSS6  | -0.42865876  | 0           |
| RP11-757F18.5 | KLK7     | -0.439696689 | 3.52E-22    |
| RP11-757F18.5 | PDZK1IP1 | -0.342395402 | 2.20E-13    |
| RP11-757F18.5 | CDH3     | -0.474983192 | 0           |
| RP11-757F18.5 | LRP4     | -0.383033017 | 4.57E-18    |
| RP11-757F18.5 | IGSF1    | -0.157331278 | 0.000952906 |
| RP11-757F18.5 | B3GNT3   | -0.32406735  | 4.52E-12    |
| RP11-757F18.5 | CLDN1    | -0.314466962 | 2.01E-11    |
| RP11-757F18.5 | GDF15    | -0.338386659 | 4.35E-13    |
| RP11-757F18.5 | ARHGAP36 | -0.144745976 | 0.002364654 |
| RP11-757F18.5 | LAMB3    | -0.352097771 | 3.93E-14    |
| RP11-757F18.5 | KLK10    | -0.520120448 | 0           |
| RP11-757F18.5 | DPP4     | -0.36422981  | 3.79E-15    |
| RP11-757F18.5 | METTL7B  | -0.579865368 | 0           |
| RP11-757F18.5 | LIPH     | -0.434893069 | 0           |
| RP11-757F18.5 | CLDN16   | -0.326165972 | 3.24E-12    |
| RP11-757F18.5 | CHI3L1   | -0.463556226 | 0           |
| RP11-757F18.5 | SLC22A31 | -0.345003909 | 1.03E-13    |
| RP11-757F18.5 | TACSTD2  | -0.464135772 | 0           |
| RP11-757F18.5 | SFTPB    | -0.330825464 | 1.52E-12    |
| RP11-757F18.5 | RXRG     | -0.502693203 | 0           |
| RP11-757F18.5 | DCSTAMP  | -0.557883787 | 2.83E-37    |
| RP11-757F18.5 | CITED1   | -0.497624228 | 0           |
| RP11-757F18.5 | SERPINA1 | -0.52188008  | 0           |
| RP11-757F18.5 | PRR15    | -0.443900578 | 0           |
| RP11-757F18.5 | SLC34A2  | -0.437858883 | 0           |
| RP11-757F18.5 | FN1      | -0.476255188 | 0           |
| RP11-757F18.5 | ZCCHC12  | -0.316787134 | 1.41E-11    |
| RP13-20L14.1  | TFF3     | 0.596856608  | 1.02E-43    |
| RP13-20L14.1  | CCL21    | 0.384401954  | 6.58E-17    |
| RP13-20L14.1  | TPO      | 0.521255112  | 5.97E-32    |
| RP13-20L14.1  | MT1G     | 0.423173653  | 1.68E-20    |
| RP13-20L14.1  | DI01     | 0.49313218   | 2.79E-28    |
| RP13-20L14.1  | DPT      | 0.322886725  | 4.14E-12    |
| RP13-20L14.1  | CDH16    | 0.534815289  | 7.59E-34    |
| RP13-20L14.1  | CRABP1   | 0.430602219  | 3.04E-21    |
| RP13-20L14.1  | SLC26A7  | 0.473827186  | 5.95E-26    |
| RP13-20L14.1  | MT1H     | 0.371718452  | 7.84E-16    |
| RP13-20L14.1  | SLC26A4  | 0.491771155  | 4.12E-28    |
| RP13-20L14.1  | SLC5A8   | 0.420351789  | 3.19E-20    |
| RP13-20L14.1  | PKHD1L1  | 0.490269237  | 6.31E-28    |
| RP13-20L14.1  | TFCP2L1  | 0.436819506  | 7.01E-22    |
| RP13-20L14.1  | WSCD2    | 0.532587454  | 1.58E-33    |
| RP13-20L14.1  | IPCEF1   | 0.494935201  | 1.66E-28    |
| RP13-20L14.1  | SLC5A5   | 0.438206794  | 5.04E-22    |
| RP13-20L14.1  | MT1F     | 0.500043548  | 3.76E-29    |
| RP13-20L14.1  | FOSB     | 0.431253843  | 2.61E-21    |

|              |           |             |             |
|--------------|-----------|-------------|-------------|
| RP13-20L14.1 | SEMA3D    | 0.484580081 | 3.13E-27    |
| RP13-20L14.1 | BMP8A     | 0.514777371 | 4.48E-31    |
| RP13-20L14.1 | MATN2     | 0.480805081 | 8.91E-27    |
| RP13-20L14.1 | PLA2R1    | 0.458143129 | 3.64E-24    |
| RP13-20L14.1 | COL23A1   | 0.551708453 | 2.49E-36    |
| RP13-20L14.1 | HGD       | 0.496175089 | 1.16E-28    |
| RP13-20L14.1 | TCEAL2    | 0.416026818 | 8.39E-20    |
| RP13-20L14.1 | CHRD1     | 0.303547726 | 8.26E-11    |
| RP13-20L14.1 | TNFRSF11B | 0.393011383 | 1.15E-17    |
| RP13-20L14.1 | FAM167A   | 0.483058609 | 4.78E-27    |
| RP13-20L14.1 | KIT       | 0.504229179 | 1.09E-29    |
| RP13-20L14.1 | SLC4A4    | 0.44635349  | 6.98E-23    |
| RP13-20L14.1 | SMOC2     | 0.451259279 | 2.07E-23    |
| RP13-20L14.1 | FHL1      | 0.545573557 | 2.06E-35    |
| RP13-20L14.1 | OTOS      | 0.478495665 | 1.68E-26    |
| RP13-20L14.1 | IGFBPL1   | 0.404334402 | 1.07E-18    |
| RP13-20L14.1 | HBB       | 0.310142906 | 3.05E-11    |
| RP13-20L14.1 | BEX1      | 0.496445591 | 1.07E-28    |
| RP13-20L14.1 | FABP4     | 0.419626395 | 3.75E-20    |
| RP13-20L14.1 | LMOD1     | 0.538696657 | 2.10E-34    |
| RP13-20L14.1 | SOD3      | 0.483547132 | 4.17E-27    |
| RP13-20L14.1 | TMEM171   | 0.415271623 | 9.92E-20    |
| RP13-20L14.1 | PI16      | 0.366835447 | 1.98E-15    |
| RP13-20L14.1 | ZMAT4     | 0.527686234 | 7.72E-33    |
| RP13-20L14.1 | MFAP4     | 0.337478444 | 3.73E-13    |
| RP13-20L14.1 | CWH43     | 0.414148633 | 1.27E-19    |
| RP13-20L14.1 | SPX       | 0.524698881 | 2.01E-32    |
| RP13-20L14.1 | APOD      | 0.28424414  | 1.33E-09    |
| RP13-20L14.1 | DPP6      | 0.531770962 | 2.06E-33    |
| RP13-20L14.1 | MMRN1     | 0.360670621 | 6.22E-15    |
| RP13-20L14.1 | WDR72     | 0.409423684 | 3.58E-19    |
| RP13-20L14.1 | MPPED2    | 0.588581804 | 2.83E-42    |
| RP13-20L14.1 | PAPSS2    | 0.355548656 | 1.58E-14    |
| RP13-20L14.1 | DCN       | 0.182284576 | 0.000122723 |
| RP13-20L14.1 | SORBS2    | 0.470552216 | 1.43E-25    |
| RP13-20L14.1 | EGR2      | 0.41299469  | 1.64E-19    |
| RP13-20L14.1 | EDN3      | 0.482092038 | 6.24E-27    |
| RP13-20L14.1 | DIO2      | 0.429340607 | 4.07E-21    |
| RP13-20L14.1 | ITPR1     | 0.519277335 | 1.11E-31    |
| RP13-20L14.1 | CFD       | 0.395256967 | 7.24E-18    |
| RP13-20L14.1 | CPXM1     | 0.505638432 | 7.17E-30    |
| RP13-20L14.1 | ELMO1     | 0.544501617 | 2.97E-35    |
| RP13-20L14.1 | GPC3      | 0.47704196  | 2.49E-26    |
| RP13-20L14.1 | MYOC      | 0.396228526 | 5.92E-18    |
| RP13-20L14.1 | DEPTOR    | 0.500649236 | 3.15E-29    |
| RP13-20L14.1 | DGKI      | 0.48538448  | 2.50E-27    |
| RP13-20L14.1 | CARTPT    | 0.471092154 | 1.24E-25    |
| RP13-20L14.1 | IYD       | 0.223411502 | 2.27E-06    |
| RP13-20L14.1 | LYVE1     | 0.387555509 | 3.50E-17    |
| RP13-20L14.1 | CLCNKB    | 0.613760978 | 8.57E-47    |
| RP13-20L14.1 | NCAM1     | 0.241439586 | 3.05E-07    |

|              |            |             |             |
|--------------|------------|-------------|-------------|
| RP13-20L14.1 | HBA2       | 0.373147085 | 5.96E-16    |
| RP13-20L14.1 | GLT8D2     | 0.477407696 | 2.26E-26    |
| RP13-20L14.1 | OGDHL      | 0.327365581 | 2.00E-12    |
| RP13-20L14.1 | LIFR       | 0.415763975 | 8.89E-20    |
| RP13-20L14.1 | CSGALNACT1 | 0.384747642 | 6.14E-17    |
| RP13-20L14.1 | RAP1GAP    | 0.370045877 | 1.08E-15    |
| RP13-20L14.1 | COL9A3     | 0.55135965  | 2.81E-36    |
| RP13-20L14.1 | FBLN1      | 0.248222157 | 1.37E-07    |
| RP13-20L14.1 | EFEMP1     | 0.372237134 | 7.10E-16    |
| RP13-20L14.1 | AOX1       | 0.382136885 | 1.03E-16    |
| RP13-20L14.1 | GRIN2C     | 0.489662737 | 7.50E-28    |
| RP13-20L14.1 | C11orf74   | 0.559988364 | 1.33E-37    |
| RP13-20L14.1 | PPARGC1A   | 0.354471042 | 1.92E-14    |
| RP13-20L14.1 | ANGPTL1    | 0.530824699 | 2.80E-33    |
| RP13-20L14.1 | SCARA5     | 0.315091648 | 1.42E-11    |
| RP13-20L14.1 | LTF        | 0.429673948 | 3.77E-21    |
| RP13-20L14.1 | CA4        | 0.55410133  | 1.08E-36    |
| RP13-20L14.1 | TG         | 0.459448408 | 2.60E-24    |
| RP13-20L14.1 | FCGBP      | 0.544176786 | 3.32E-35    |
| RP13-20L14.1 | PBX4       | 0.755412966 | 2.97E-82    |
| RP13-20L14.1 | CYR61      | 0.442753547 | 1.68E-22    |
| RP13-20L14.1 | FOS        | 0.42585017  | 9.12E-21    |
| RP13-20L14.1 | KHDRBS2    | 0.586624594 | 6.11E-42    |
| RP13-20L14.1 | MUM1L1     | 0.423000174 | 1.75E-20    |
| RP13-20L14.1 | RGS16      | 0.477824585 | 2.02E-26    |
| RP13-20L14.1 | MT1M       | 0.404116041 | 1.12E-18    |
| RP13-20L14.1 | LRP2       | 0.382676246 | 9.28E-17    |
| RP13-20L14.1 | MAFB       | 0.391657308 | 1.52E-17    |
| RP13-20L14.1 | KCNK2      | 0.43078674  | 2.91E-21    |
| RP13-20L14.1 | TBC1D4     | 0.494341712 | 1.97E-28    |
| RP13-20L14.1 | MIOX       | 0.610322266 | 3.75E-46    |
| RP13-20L14.1 | TPPP       | 0.424586736 | 1.22E-20    |
| RP13-20L14.1 | FMOD       | 0.383389738 | 8.05E-17    |
| RP13-20L14.1 | CITED2     | 0.357645869 | 1.08E-14    |
| RP13-20L14.1 | RGS8       | 0.534592763 | 8.17E-34    |
| RP13-20L14.1 | ABI3BP     | 0.277550366 | 3.31E-09    |
| RP13-20L14.1 | ADH1B      | 0.356738329 | 1.28E-14    |
| RP13-20L14.1 | OGN        | 0.249022842 | 1.25E-07    |
| RP13-20L14.1 | NR4A1      | 0.417618912 | 5.88E-20    |
| RP13-20L14.1 | FOXJ1      | 0.618338165 | 1.17E-47    |
| RP13-20L14.1 | ALDH1A1    | 0.447157338 | 5.73E-23    |
| RP13-20L14.1 | OCA2       | 0.544898639 | 2.59E-35    |
| RP13-20L14.1 | TMEM139    | 0.427443966 | 6.32E-21    |
| RP13-20L14.1 | ARHGAP24   | 0.40374965  | 1.21E-18    |
| RP13-20L14.1 | SLC25A15   | 0.335056543 | 5.61E-13    |
| RP13-20L14.1 | DES        | 0.287925585 | 7.94E-10    |
| RP13-20L14.1 | GDF10      | 0.441563245 | 2.25E-22    |
| RP13-20L14.1 | KIAA1324   | 0.445419    | 8.79E-23    |
| RP13-20L14.1 | JUN        | 0.442590139 | 1.75E-22    |
| RP13-20L14.1 | C7         | 0.153567304 | 0.001248405 |
| RP13-20L14.1 | LGI3       | 0.445444674 | 8.73E-23    |

|              |          |             |             |
|--------------|----------|-------------|-------------|
| RP13-20L14.1 | CDON     | 0.516844086 | 2.37E-31    |
| RP13-20L14.1 | BCL2     | 0.415830501 | 8.76E-20    |
| RP13-20L14.1 | HLF      | 0.49074106  | 5.52E-28    |
| RP13-20L14.1 | EGR1     | 0.440422286 | 2.96E-22    |
| RP13-20L14.1 | IP6K3    | 0.375508275 | 3.78E-16    |
| RP13-20L14.1 | SCUBE3   | 0.438126062 | 5.13E-22    |
| RP13-20L14.1 | PKNOX2   | 0.60235078  | 1.07E-44    |
| RP13-20L14.1 | SMAD9    | 0.38140728  | 1.19E-16    |
| RP13-20L14.1 | IQGAP2   | 0.339579202 | 2.61E-13    |
| RP13-20L14.1 | GNA14    | 0.502365589 | 1.90E-29    |
| RP13-20L14.1 | LAYN     | 0.579137893 | 1.11E-40    |
| RP13-20L14.1 | AVPR1A   | 0.457073459 | 4.78E-24    |
| RP13-20L14.1 | PDLIM3   | 0.405775655 | 7.87E-19    |
| RP13-20L14.1 | GPM6A    | 0.398559173 | 3.64E-18    |
| RP13-20L14.1 | SDPR     | 0.426382381 | 8.07E-21    |
| RP13-20L14.1 | CRYAB    | 0.233131164 | 7.86E-07    |
| RP13-20L14.1 | FOXA2    | 0.525788745 | 1.42E-32    |
| RP13-20L14.1 | C8orf88  | 0.409932774 | 3.20E-19    |
| RP13-20L14.1 | ISM1     | 0.399693384 | 2.87E-18    |
| RP13-20L14.1 | BMP2     | 0.326073778 | 2.47E-12    |
| RP13-20L14.1 | ID4      | 0.56383271  | 3.33E-38    |
| RP13-20L14.1 | NUPR1    | 0.218295779 | 3.90E-06    |
| RP13-20L14.1 | SERTM1   | 0.278709564 | 2.83E-09    |
| RP13-20L14.1 | IRS1     | 0.481573894 | 7.21E-27    |
| RP13-20L14.1 | FIBIN    | 0.145206398 | 0.002289042 |
| RP13-20L14.1 | PODN     | 0.260693799 | 2.98E-08    |
| RP13-20L14.1 | TDRD9    | 0.326557194 | 2.29E-12    |
| RP13-20L14.1 | EPHA3    | 0.297193523 | 2.11E-10    |
| RP13-20L14.1 | AIF1L    | 0.369794524 | 1.13E-15    |
| RP13-20L14.1 | EBF4     | 0.621176188 | 3.34E-48    |
| RP13-20L14.1 | ADM2     | 0.393659483 | 1.01E-17    |
| RP13-20L14.1 | GSTM3    | 0.521493273 | 5.54E-32    |
| RP13-20L14.1 | HSD17B6  | 0.42265591  | 1.89E-20    |
| RP13-20L14.1 | AGR3     | 0.454439143 | 9.32E-24    |
| RP13-20L14.1 | EPHB1    | 0.291030258 | 5.12E-10    |
| RP13-20L14.1 | TMOD1    | 0.313363266 | 1.86E-11    |
| RP13-20L14.1 | WASF3    | 0.384648207 | 6.27E-17    |
| RP13-20L14.1 | SELV     | 0.557302448 | 3.48E-37    |
| RP13-20L14.1 | ENPP1    | 0.121684    | 0.01071733  |
| RP13-20L14.1 | SYNE1    | 0.501358845 | 2.55E-29    |
| RP13-20L14.1 | PLCH1    | 0.504232441 | 1.09E-29    |
| RP13-20L14.1 | CCDC146  | 0.647686742 | 1.44E-53    |
| RP13-20L14.1 | SLC16A2  | 0.510334996 | 1.74E-30    |
| RP13-20L14.1 | IER2     | 0.593964767 | 3.30E-43    |
| RP13-20L14.1 | KCNAB1   | 0.552341376 | 1.99E-36    |
| RP13-20L14.1 | SYNDIG1  | 0.46316651  | 9.97E-25    |
| RP13-20L14.1 | C16orf89 | 0.484515381 | 3.19E-27    |
| RP13-20L14.1 | CTGF     | 0.331776891 | 9.70E-13    |
| RP13-20L14.1 | NR4A3    | 0.224659049 | 1.99E-06    |
| RP13-20L14.1 | KIAA1456 | 0.468215849 | 2.66E-25    |
| RP13-20L14.1 | AQP4     | 0.363936797 | 3.40E-15    |

|              |          |             |             |
|--------------|----------|-------------|-------------|
| RP13-20L14.1 | RNF150   | 0.525148962 | 1.74E-32    |
| RP13-20L14.1 | C1S      | 0.119234155 | 0.012418115 |
| RP13-20L14.1 | PFKFB2   | 0.211571223 | 7.79E-06    |
| RP13-20L14.1 | PROX1    | 0.448763901 | 3.85E-23    |
| RP13-20L14.1 | TCF7L1   | 0.652055781 | 1.68E-54    |
| RP13-20L14.1 | HSPB6    | 0.370497519 | 9.90E-16    |
| RP13-20L14.1 | FHDC1    | 0.358146306 | 9.87E-15    |
| RP13-20L14.1 | PRR15L   | 0.270404382 | 8.56E-09    |
| RP13-20L14.1 | SLC1A1   | 0.226419516 | 1.64E-06    |
| RP13-20L14.1 | BTBD11   | 0.584812211 | 1.24E-41    |
| RP13-20L14.1 | TRIM58   | 0.277131632 | 3.50E-09    |
| RP13-20L14.1 | LRIG1    | 0.387871545 | 3.28E-17    |
| RP13-20L14.1 | ROR2     | 0.431683641 | 2.36E-21    |
| RP13-20L14.1 | GPR125   | 0.483818344 | 3.87E-27    |
| RP13-20L14.1 | FLRT1    | 0.648689602 | 8.84E-54    |
| RP13-20L14.1 | PGF      | 0.560473482 | 1.12E-37    |
| RP13-20L14.1 | DUSP1    | 0.367577734 | 1.72E-15    |
| RP13-20L14.1 | PLA2G7   | 0.443123343 | 1.54E-22    |
| RP13-20L14.1 | PLSCR4   | 0.297778076 | 1.94E-10    |
| RP13-20L14.1 | FAM46B   | 0.270581975 | 8.36E-09    |
| RP13-20L14.1 | GLDC     | 0.428858042 | 4.56E-21    |
| RP13-20L14.1 | ZBTB16   | 0.298296244 | 1.79E-10    |
| RP13-20L14.1 | OMD      | 0.17356872  | 0.000258114 |
| RP13-20L14.1 | HSD11B2  | 0.603443146 | 6.81E-45    |
| RP13-20L14.1 | FGL2     | 0.186205945 | 8.68E-05    |
| RP13-20L14.1 | CLCNKA   | 0.626836131 | 2.64E-49    |
| RP13-20L14.1 | GATM     | 0.255232961 | 5.88E-08    |
| RP13-20L14.1 | TNS3     | 0.347508751 | 6.62E-14    |
| RP13-20L14.1 | TOB1     | 0.37292864  | 6.22E-16    |
| RP13-20L14.1 | MARC2    | 0.498773731 | 5.45E-29    |
| RP13-20L14.1 | LRRC2    | 0.314670814 | 1.52E-11    |
| RP13-20L14.1 | SORD     | 0.296604431 | 2.30E-10    |
| RP13-20L14.1 | RIMS4    | 0.441894094 | 2.07E-22    |
| RP13-20L14.1 | SLC29A4  | 0.597494921 | 7.90E-44    |
| RP13-20L14.1 | SLC39A14 | 0.287119811 | 8.89E-10    |
| RP13-20L14.1 | FAXDC2   | 0.493736166 | 2.34E-28    |
| RP13-20L14.1 | HSPB8    | 0.226287031 | 1.67E-06    |
| RP13-20L14.1 | CCL19    | 0.060761629 | 0.203856025 |
| RP13-20L14.1 | KCNIP3   | 0.591503716 | 8.86E-43    |
| RP13-20L14.1 | CGNL1    | 0.365965072 | 2.33E-15    |
| RP13-20L14.1 | ATF3     | 0.241564837 | 3.01E-07    |
| RP13-20L14.1 | SGCD     | 0.24366588  | 2.35E-07    |
| RP13-20L14.1 | STARD13  | 0.442664325 | 1.72E-22    |
| RP13-20L14.1 | LDHD     | 0.460555101 | 1.96E-24    |
| RP13-20L14.1 | RCAN1    | 0.350763579 | 3.73E-14    |
| RP13-20L14.1 | ID3      | 0.452432073 | 1.54E-23    |
| RP13-20L14.1 | SYTL3    | 0.418077505 | 5.31E-20    |
| RP13-20L14.1 | MT1E     | 0.312104796 | 2.26E-11    |
| RP13-20L14.1 | CAMK1D   | 0.444512879 | 1.10E-22    |
| RP13-20L14.1 | PRKCQ    | 0.456173012 | 6.01E-24    |
| RP13-20L14.1 | NUAK2    | 0.389430731 | 2.39E-17    |

|              |          |             |             |
|--------------|----------|-------------|-------------|
| RP13-20L14.1 | LIPG     | 0.470415617 | 1.48E-25    |
| RP13-20L14.1 | SLC25A25 | 0.245012011 | 2.01E-07    |
| RP13-20L14.1 | PRKX     | 0.285186432 | 1.16E-09    |
| RP13-20L14.1 | SRPX     | 0.295540009 | 2.68E-10    |
| RP13-20L14.1 | FAM189A1 | 0.564676418 | 2.45E-38    |
| RP13-20L14.1 | PLEKHH1  | 0.571570623 | 1.94E-39    |
| RP13-20L14.1 | WNT11    | 0.535269201 | 6.54E-34    |
| RP13-20L14.1 | SNAI1    | 0.442759079 | 1.68E-22    |
| RP13-20L14.1 | FDCSP    | 0.069040003 | 0.148697334 |
| RP13-20L14.1 | MT1X     | 0.318466648 | 8.36E-12    |
| RP13-20L14.1 | ACACB    | 0.535961416 | 5.20E-34    |
| RP13-20L14.1 | ARC      | 0.330293594 | 1.24E-12    |
| RP13-20L14.1 | KLK4     | 0.186909122 | 8.16E-05    |
| RP13-20L14.1 | ZFPM2    | 0.422928825 | 1.78E-20    |
| RP13-20L14.1 | AKAP12   | 0.308237188 | 4.08E-11    |
| RP13-20L14.1 | GJB6     | 0.355289552 | 1.66E-14    |
| RP13-20L14.1 | ERO1LB   | 0.484215091 | 3.46E-27    |
| RP13-20L14.1 | DNALI1   | 0.672083912 | 5.36E-59    |
| RP13-20L14.1 | HKDC1    | 0.284592801 | 1.26E-09    |
| RP13-20L14.1 | ZFP36L2  | 0.423466284 | 1.57E-20    |
| RP13-20L14.1 | CAPSL    | 0.565611823 | 1.74E-38    |
| RP13-20L14.1 | CYP7B1   | 0.289247521 | 6.59E-10    |
| RP13-20L14.1 | CPQ      | 0.487246226 | 1.48E-27    |
| RP13-20L14.1 | RPS6KA6  | 0.537491116 | 3.13E-34    |
| RP13-20L14.1 | TLE1     | 0.392100581 | 1.39E-17    |
| RP13-20L14.1 | TP53INP2 | 0.505613892 | 7.22E-30    |
| RP13-20L14.1 | KATNAL2  | 0.574802614 | 5.77E-40    |
| RP13-20L14.1 | SGPP2    | 0.089797434 | 0.060121673 |
| RP13-20L14.1 | CTH      | 0.36766341  | 1.69E-15    |
| RP13-20L14.1 | KIF12    | 0.612431443 | 1.52E-46    |
| RP13-20L14.1 | TMEM220  | 0.465881042 | 4.91E-25    |
| RP13-20L14.1 | CENPJ    | 0.499335588 | 4.62E-29    |
| RP13-20L14.1 | FAM155B  | 0.417660899 | 5.83E-20    |
| RP13-20L14.1 | WFS1     | 0.489040169 | 8.94E-28    |
| RP13-20L14.1 | SELENBP1 | 0.551906188 | 2.32E-36    |
| RP13-20L14.1 | SNTA1    | 0.342112312 | 1.69E-13    |
| RP13-20L14.1 | FRAS1    | 0.226365189 | 1.65E-06    |
| RP13-20L14.1 | FBLN7    | 0.421260842 | 2.60E-20    |
| RP13-20L14.1 | AGPAT9   | 0.404774213 | 9.76E-19    |
| RP13-20L14.1 | GPR83    | 0.466381763 | 4.31E-25    |
| RP13-20L14.1 | PRTG     | 0.393666008 | 1.01E-17    |
| RP13-20L14.1 | EGR3     | 0.325719301 | 2.62E-12    |
| RP13-20L14.1 | GRAMD2   | 0.461451434 | 1.56E-24    |
| RP13-20L14.1 | HYOU1    | 0.371282928 | 8.52E-16    |
| RP13-20L14.1 | FBLN5    | 0.377272289 | 2.69E-16    |
| RP13-20L14.1 | ITM2A    | 0.479331004 | 1.34E-26    |
| RP13-20L14.1 | SRF      | 0.544106714 | 3.40E-35    |
| RP13-20L14.1 | FGFR2    | 0.434908114 | 1.10E-21    |
| RP13-20L14.1 | MT1A     | 0.250781375 | 1.01E-07    |
| RP13-20L14.1 | MAMDC2   | 0.319504829 | 7.09E-12    |
| RP13-20L14.1 | FHL2     | 0.329389743 | 1.44E-12    |

|              |          |             |             |
|--------------|----------|-------------|-------------|
| RP13-20L14.1 | FTCDNL1  | 0.263593441 | 2.06E-08    |
| RP13-20L14.1 | PKIA     | 0.411298764 | 2.38E-19    |
| RP13-20L14.1 | DNAJB4   | 0.388845043 | 2.69E-17    |
| RP13-20L14.1 | SLC25A33 | 0.498499115 | 5.90E-29    |
| RP13-20L14.1 | EYA2     | 0.261290834 | 2.76E-08    |
| RP13-20L14.1 | LPAR1    | 0.159593545 | 0.000791198 |
| RP13-20L14.1 | STX11    | 0.080274231 | 0.092986821 |
| RP13-20L14.1 | ARHGEF28 | 0.280563912 | 2.20E-09    |
| RP13-20L14.1 | OR2W3    | 0.366656719 | 2.05E-15    |
| RP13-20L14.1 | ALDH1B1  | 0.198593478 | 2.78E-05    |
| RP13-20L14.1 | CXCL12   | 0.23358465  | 7.47E-07    |
| RP13-20L14.1 | OLFM2    | 0.579124701 | 1.12E-40    |
| RP13-20L14.1 | TUB      | 0.406743763 | 6.39E-19    |
| RP13-20L14.1 | HTRA3    | 0.345433383 | 9.51E-14    |
| RP13-20L14.1 | CKB      | 0.451526236 | 1.94E-23    |
| RP13-20L14.1 | RGS2     | 0.141750998 | 0.002914742 |
| RP13-20L14.1 | SHANK2   | 0.503354832 | 1.41E-29    |
| RP13-20L14.1 | CNTFR    | 0.439237998 | 3.93E-22    |
| RP13-20L14.1 | CYTH3    | 0.443178947 | 1.52E-22    |
| RP13-20L14.1 | PLAC9    | 0.498960402 | 5.16E-29    |
| RP13-20L14.1 | WWOX     | 0.503317101 | 1.43E-29    |
| RP13-20L14.1 | NPR3     | 0.412877666 | 1.68E-19    |
| RP13-20L14.1 | SDC2     | 0.447101451 | 5.81E-23    |
| RP13-20L14.1 | KLF15    | 0.421469925 | 2.48E-20    |
| RP13-20L14.1 | TMEM164  | 0.432773028 | 1.83E-21    |
| RP13-20L14.1 | LONRF3   | 0.207463893 | 1.17E-05    |
| RP13-20L14.1 | GBP1     | 0.168511628 | 0.000391075 |
| RP13-20L14.1 | ARHGAP6  | 0.322047158 | 4.73E-12    |
| RP13-20L14.1 | TMEM119  | 0.175318313 | 0.00022295  |
| RP13-20L14.1 | SH3RF1   | 0.267182178 | 1.30E-08    |
| RP13-20L14.1 | CRELD2   | 0.568579772 | 5.87E-39    |
| RP13-20L14.1 | PCP4     | 0.257340812 | 4.53E-08    |
| RP13-20L14.1 | GCSH     | 0.537474217 | 3.15E-34    |
| RP13-20L14.1 | IMPA2    | 0.473389587 | 6.69E-26    |
| RP13-20L14.1 | C1R      | 0.134207132 | 0.004852172 |
| RP13-20L14.1 | SUCNR1   | 0.272175204 | 6.78E-09    |
| RP13-20L14.1 | SFRP1    | 0.317445915 | 9.82E-12    |
| RP13-20L14.1 | UGT8     | 0.272877915 | 6.18E-09    |
| RP13-20L14.1 | TLE4     | 0.34464996  | 1.09E-13    |
| RP13-20L14.1 | ANTXR1   | 0.279933684 | 2.40E-09    |
| RP13-20L14.1 | GPX3     | 0.347996138 | 6.08E-14    |
| RP13-20L14.1 | DPY19L2  | 0.633497755 | 1.25E-50    |
| RP13-20L14.1 | FAM46C   | 0.309061462 | 3.60E-11    |
| RP13-20L14.1 | IL33     | 0.248667638 | 1.30E-07    |
| RP13-20L14.1 | PEG3     | 0.423219612 | 1.66E-20    |
| RP13-20L14.1 | FAHD2A   | 0.645772654 | 3.67E-53    |
| RP13-20L14.1 | PTGDS    | 0.178061214 | 0.000176714 |
| RP13-20L14.1 | CHCHD10  | 0.319805403 | 6.76E-12    |
| RP13-20L14.1 | CD36     | 0.40546047  | 8.42E-19    |
| RP13-20L14.1 | ANKRD37  | 0.642275976 | 1.98E-52    |
| RP13-20L14.1 | TSPAN33  | 0.420086488 | 3.38E-20    |



|              |          |             |             |
|--------------|----------|-------------|-------------|
| RP13-20L14.1 | PRDM16   | 0.547581973 | 1.04E-35    |
| RP13-20L14.1 | UST      | 0.42538023  | 1.02E-20    |
| RP13-20L14.1 | NEXN     | 0.409060839 | 3.87E-19    |
| RP13-20L14.1 | NUPR1L   | 0.262184707 | 2.47E-08    |
| RP13-20L14.1 | SLC24A3  | 0.306048058 | 5.68E-11    |
| RP13-20L14.1 | MARC1    | 0.54436445  | 3.11E-35    |
| RP13-20L14.1 | MYH11    | 0.343118435 | 1.42E-13    |
| RP13-20L14.1 | APOA1    | 0.593459103 | 4.05E-43    |
| RP13-20L14.1 | TMEM178B | 0.335030443 | 5.63E-13    |
| RP13-20L14.1 | CAPN6    | 0.352577205 | 2.70E-14    |
| RP13-20L14.1 | PPM1L    | 0.351755517 | 3.12E-14    |
| RP13-20L14.1 | FZD8     | 0.515186884 | 3.95E-31    |
| RP13-20L14.1 | RCAN2    | 0.445695886 | 8.21E-23    |
| RP13-20L14.1 | COPZ2    | 0.412275524 | 1.92E-19    |
| RP13-20L14.1 | GAS1     | 0.221772598 | 2.71E-06    |
| RP13-20L14.1 | DACT1    | 0.40189457  | 1.80E-18    |
| RP13-20L14.1 | WBSCR17  | 0.519779616 | 9.48E-32    |
| RP13-20L14.1 | NCS1     | 0.418559076 | 4.77E-20    |
| RP13-20L14.1 | SPIRE2   | 0.560920585 | 9.55E-38    |
| RP13-20L14.1 | C15orf52 | 0.281573723 | 1.92E-09    |
| RP13-20L14.1 | SPAG5    | 0.495305706 | 1.49E-28    |
| RP13-20L14.1 | ARL4D    | 0.321145009 | 5.46E-12    |
| RP13-20L14.1 | FAM189A2 | 0.608219571 | 9.16E-46    |
| RP13-20L14.1 | MAP1LC3A | 0.61769639  | 1.55E-47    |
| RP13-20L14.1 | KLF6     | 0.118972447 | 0.012613189 |
| RP13-20L14.1 | ADD3     | 0.313924839 | 1.70E-11    |
| RP13-20L14.1 | TSPAN7   | 0.439360843 | 3.82E-22    |
| RP13-20L14.1 | KLF9     | 0.30505002  | 6.60E-11    |
| RP13-20L14.1 | KCNQ1    | 0.423604869 | 1.52E-20    |
| RP13-20L14.1 | MAN1A1   | 0.134237629 | 0.004842424 |
| RP13-20L14.1 | MLF1     | 0.358096234 | 9.96E-15    |
| RP13-20L14.1 | RARB     | 0.500255185 | 3.53E-29    |
| RP13-20L14.1 | CDC42EP2 | 0.461203769 | 1.66E-24    |
| RP13-20L14.1 | FAM3B    | 0.245497696 | 1.90E-07    |
| RP13-20L14.1 | GADD45B  | 0.278497338 | 2.91E-09    |
| RP13-20L14.1 | TMEM47   | 0.400585036 | 2.38E-18    |
| RP13-20L14.1 | SDF2L1   | 0.498540818 | 5.83E-29    |
| RP13-20L14.1 | CCDC85A  | 0.265258161 | 1.67E-08    |
| RP13-20L14.1 | CRYBG3   | 0.004379678 | 0.927092729 |
| RP13-20L14.1 | FBLN2    | 0.107510475 | 0.024277756 |
| RP13-20L14.1 | PEBP4    | 0.136450731 | 0.004180417 |
| RP13-20L14.1 | CDADC1   | 0.57112508  | 2.29E-39    |
| RP13-20L14.1 | FAM63A   | 0.385110062 | 5.71E-17    |
| RP13-20L14.1 | GLUL     | 0.277400291 | 3.38E-09    |
| RP13-20L14.1 | FREM2    | 0.166839957 | 0.000447512 |
| RP13-20L14.1 | ACKR3    | 0.523198704 | 3.23E-32    |
| RP13-20L14.1 | DENND6A  | 0.474538267 | 4.91E-26    |
| RP13-20L14.1 | CLDN8    | 0.036776185 | 0.442125005 |
| RP13-20L14.1 | UTS2R    | 0.445278977 | 9.09E-23    |
| RP13-20L14.1 | SCNN1B   | 0.48888669  | 9.34E-28    |
| RP13-20L14.1 | TTC30A   | 0.341023633 | 2.04E-13    |

|              |          |              |             |
|--------------|----------|--------------|-------------|
| RP13-20L14.1 | COR02B   | 0.530913495  | 2.72E-33    |
| RP13-20L14.1 | TC2N     | 0.160927478  | 0.000713665 |
| RP13-20L14.1 | ALDH2    | 0.386319594  | 4.48E-17    |
| RP13-20L14.1 | GPR183   | 0.049619183  | 0.299590351 |
| RP13-20L14.1 | C4orf47  | 0.703911328  | 6.45E-67    |
| RP13-20L14.1 | SLC25A42 | 0.610718779  | 3.16E-46    |
| RP13-20L14.1 | LGMN     | 0.338476907  | 3.15E-13    |
| RP13-20L14.1 | ACSF2    | 0.471356915  | 1.15E-25    |
| RP13-20L14.1 | KIAA1467 | 0.340210565  | 2.34E-13    |
| RP13-20L14.1 | PRKG1    | 0.489386134  | 8.11E-28    |
| RP13-20L14.1 | GNAI1    | 0.400372549  | 2.48E-18    |
| RP13-20L14.1 | ABCC4    | 0.225729571  | 1.77E-06    |
| RP13-20L14.1 | PRPS1    | 0.363239759  | 3.87E-15    |
| RP13-20L14.1 | TSPAN5   | 0.303551404  | 8.26E-11    |
| RP13-20L14.1 | CR2      | 0.11982525   | 0.01198729  |
| RP13-20L14.1 | CCDC170  | 0.344000583  | 1.22E-13    |
| RP13-20L14.1 | RRAD     | 0.14490937   | 0.002337564 |
| RP13-20L14.1 | SCGB2A1  | 0.343879304  | 1.25E-13    |
| RP13-20L14.1 | SESN3    | 0.270652898  | 8.29E-09    |
| RP13-20L14.1 | SGK223   | 0.289505683  | 6.35E-10    |
| RP13-20L14.1 | NDRG2    | 0.510582662  | 1.62E-30    |
| RP13-20L14.1 | C3orf52  | 0.229691366  | 1.15E-06    |
| RP13-20L14.1 | FLRT3    | -0.2536081   | 7.17E-08    |
| RP13-20L14.1 | MST1R    | -0.327985029 | 1.81E-12    |
| RP13-20L14.1 | SDC1     | -0.491205468 | 4.84E-28    |
| RP13-20L14.1 | ST8SIA4  | -0.454493681 | 9.19E-24    |
| RP13-20L14.1 | UBTD1    | -0.176832107 | 0.000196194 |
| RP13-20L14.1 | EPHA2    | -0.193525266 | 4.47E-05    |
| RP13-20L14.1 | TMEM130  | -0.032882193 | 0.49196931  |
| RP13-20L14.1 | SPINK2   | -0.428795913 | 4.62E-21    |
| RP13-20L14.1 | MMP16    | -0.434396187 | 1.25E-21    |
| RP13-20L14.1 | SIGLEC15 | -0.330427214 | 1.21E-12    |
| RP13-20L14.1 | RIN1     | -0.23617464  | 5.58E-07    |
| RP13-20L14.1 | IL1RN    | -0.543099881 | 4.78E-35    |
| RP13-20L14.1 | FCER1G   | -0.250886617 | 9.98E-08    |
| RP13-20L14.1 | CD276    | -0.384335434 | 6.67E-17    |
| RP13-20L14.1 | CTSB     | -0.513700749 | 6.24E-31    |
| RP13-20L14.1 | FAM171A2 | -0.013257192 | 0.781788374 |
| RP13-20L14.1 | ASPHD1   | -0.407204057 | 5.79E-19    |
| RP13-20L14.1 | C15orf48 | -0.404749389 | 9.81E-19    |
| RP13-20L14.1 | DYSF     | -0.106595844 | 0.025520603 |
| RP13-20L14.1 | PDZRN4   | 0.039717105  | 0.406470514 |
| RP13-20L14.1 | EFHD2    | -0.053801125 | 0.260648514 |
| RP13-20L14.1 | ASF1B    | -0.3541499   | 2.04E-14    |
| RP13-20L14.1 | AQP1     | -0.090131059 | 0.059172005 |
| RP13-20L14.1 | ARRDC2   | -0.110485013 | 0.020590467 |
| RP13-20L14.1 | PRSS1    | -0.251188297 | 9.62E-08    |
| RP13-20L14.1 | MAPK13   | -0.530473201 | 3.14E-33    |
| RP13-20L14.1 | CST5     | -0.389591208 | 2.31E-17    |
| RP13-20L14.1 | AHR      | -0.457298286 | 4.51E-24    |
| RP13-20L14.1 | BAX      | -0.229983288 | 1.11E-06    |

|              |          |              |             |
|--------------|----------|--------------|-------------|
| RP13-20L14.1 | C1orf115 | -0.169439451 | 0.000362686 |
| RP13-20L14.1 | PLK3     | -0.190219657 | 6.05E-05    |
| RP13-20L14.1 | JAG2     | -0.079571661 | 0.095892981 |
| RP13-20L14.1 | RAD23B   | -0.509944633 | 1.96E-30    |
| RP13-20L14.1 | CA12     | 0.047633746  | 0.319367933 |
| RP13-20L14.1 | ADTRP    | -0.157002704 | 0.000964489 |
| RP13-20L14.1 | UCP2     | -0.177881068 | 0.000179451 |
| RP13-20L14.1 | IGFBP2   | -0.10199148  | 0.032643561 |
| RP13-20L14.1 | LOXL2    | -0.179666926 | 0.000153989 |
| RP13-20L14.1 | GPX1     | -0.264299841 | 1.89E-08    |
| RP13-20L14.1 | P3H3     | -0.174147505 | 0.000245945 |
| RP13-20L14.1 | C2orf81  | -0.088404919 | 0.064222441 |
| RP13-20L14.1 | CDT1     | -0.381653385 | 1.14E-16    |
| RP13-20L14.1 | SNX25    | -0.223215185 | 2.32E-06    |
| RP13-20L14.1 | MTHFD1L  | -0.458799598 | 3.08E-24    |
| RP13-20L14.1 | CDC42BPG | -0.486447288 | 1.86E-27    |
| RP13-20L14.1 | MSN      | -0.58881727  | 2.58E-42    |
| RP13-20L14.1 | SIGLEC6  | -0.306829505 | 5.05E-11    |
| RP13-20L14.1 | F2R      | -0.212663306 | 6.97E-06    |
| RP13-20L14.1 | TMEM184A | -0.35140558  | 3.32E-14    |
| RP13-20L14.1 | CKS2     | -0.22773898  | 1.42E-06    |
| RP13-20L14.1 | TAX1BP3  | -0.33493427  | 5.73E-13    |
| RP13-20L14.1 | PMEP1    | -0.317243499 | 1.01E-11    |
| RP13-20L14.1 | CXCL16   | -0.498338402 | 6.19E-29    |
| RP13-20L14.1 | FAXC     | -0.420934026 | 2.79E-20    |
| RP13-20L14.1 | VTCN1    | -0.465368892 | 5.62E-25    |
| RP13-20L14.1 | SH2D4A   | -0.469044946 | 2.13E-25    |
| RP13-20L14.1 | RNF24    | -0.393701044 | 9.98E-18    |
| RP13-20L14.1 | LY6G6C   | -0.324645491 | 3.12E-12    |
| RP13-20L14.1 | NID1     | -0.32865625  | 1.62E-12    |
| RP13-20L14.1 | STAC     | -0.528330314 | 6.27E-33    |
| RP13-20L14.1 | RAB34    | -0.190114406 | 6.11E-05    |
| RP13-20L14.1 | HES4     | -0.02892678  | 0.545523333 |
| RP13-20L14.1 | EPHA10   | -0.422045541 | 2.17E-20    |
| RP13-20L14.1 | ENTPD2   | -0.181726123 | 0.000128845 |
| RP13-20L14.1 | DDB2     | -0.350797623 | 3.70E-14    |
| RP13-20L14.1 | NKAIN4   | -0.08271599  | 0.083430585 |
| RP13-20L14.1 | TRIM29   | -0.283434476 | 1.48E-09    |
| RP13-20L14.1 | ADCY8    | -0.415989225 | 8.46E-20    |
| RP13-20L14.1 | SFTA2    | -0.366001385 | 2.31E-15    |
| RP13-20L14.1 | NRIP1    | -0.415911922 | 8.61E-20    |
| RP13-20L14.1 | VWA1     | 0.084994909  | 0.075242378 |
| RP13-20L14.1 | APLNR    | -0.144385386 | 0.002425456 |
| RP13-20L14.1 | REN      | -0.319693996 | 6.88E-12    |
| RP13-20L14.1 | EDIL3    | -0.243674958 | 2.35E-07    |
| RP13-20L14.1 | AGRN     | -0.280325041 | 2.27E-09    |
| RP13-20L14.1 | TREM1    | -0.363732253 | 3.53E-15    |
| RP13-20L14.1 | SRL      | -0.323724645 | 3.61E-12    |
| RP13-20L14.1 | RASGRF1  | -0.253875056 | 6.94E-08    |
| RP13-20L14.1 | RMI2     | -0.320677764 | 5.89E-12    |
| RP13-20L14.1 | SAMD1    | -0.200330108 | 2.35E-05    |

|              |          |              |             |
|--------------|----------|--------------|-------------|
| RP13-20L14.1 | MGAT4B   | -0.469009201 | 2.15E-25    |
| RP13-20L14.1 | NXN      | -0.330403951 | 1.22E-12    |
| RP13-20L14.1 | SH3BGRL3 | -0.316828879 | 1.08E-11    |
| RP13-20L14.1 | CA11     | -0.085111224 | 0.074842649 |
| RP13-20L14.1 | PLD3     | -0.096025098 | 0.044340056 |
| RP13-20L14.1 | LURAP1L  | -0.533245039 | 1.27E-33    |
| RP13-20L14.1 | CARNS1   | -0.081971859 | 0.086254993 |
| RP13-20L14.1 | PDLIM7   | -0.1026549   | 0.031522757 |
| RP13-20L14.1 | BCL2L1   | -0.481222963 | 7.94E-27    |
| RP13-20L14.1 | GGT6     | -0.268762641 | 1.06E-08    |
| RP13-20L14.1 | DPYSL3   | -0.250716684 | 1.02E-07    |
| RP13-20L14.1 | FYN      | -0.339612395 | 2.60E-13    |
| RP13-20L14.1 | TK1      | -0.327170825 | 2.07E-12    |
| RP13-20L14.1 | AK1      | -0.171839933 | 0.000297896 |
| RP13-20L14.1 | HIGD1B   | 0.050530552  | 0.29079052  |
| RP13-20L14.1 | TMEM59L  | -0.136365339 | 0.00420436  |
| RP13-20L14.1 | MEGF9    | -0.483136342 | 4.68E-27    |
| RP13-20L14.1 | ZFP36L1  | -0.330369198 | 1.22E-12    |
| RP13-20L14.1 | ADRA1B   | -0.219903618 | 3.30E-06    |
| RP13-20L14.1 | EPHA4    | -0.410070933 | 3.11E-19    |
| RP13-20L14.1 | TCERG1L  | -0.003448166 | 0.942569011 |
| RP13-20L14.1 | NGFR     | -0.06696569  | 0.161315978 |
| RP13-20L14.1 | EBI3     | -0.391600569 | 1.54E-17    |
| RP13-20L14.1 | S100A10  | -0.319482843 | 7.12E-12    |
| RP13-20L14.1 | S100B    | -0.301869662 | 1.06E-10    |
| RP13-20L14.1 | CD44     | -0.210656308 | 8.54E-06    |
| RP13-20L14.1 | BHLHE41  | -0.3355462   | 5.17E-13    |
| RP13-20L14.1 | FBXO2    | -0.156233466 | 0.001022318 |
| RP13-20L14.1 | SLC30A2  | -0.424799933 | 1.16E-20    |
| RP13-20L14.1 | FRMD5    | -0.573198463 | 1.05E-39    |
| RP13-20L14.1 | SAMD11   | -0.109420024 | 0.021850522 |
| RP13-20L14.1 | SIPA1L2  | -0.261338211 | 2.75E-08    |
| RP13-20L14.1 | S100A16  | -0.388708444 | 2.77E-17    |
| RP13-20L14.1 | PPL      | -0.497403912 | 8.12E-29    |
| RP13-20L14.1 | ARHGD1B  | -0.092243874 | 0.053441909 |
| RP13-20L14.1 | CDC42EP3 | -0.491114544 | 4.96E-28    |
| RP13-20L14.1 | RUNX2    | -0.255170122 | 5.92E-08    |
| RP13-20L14.1 | LAMC2    | -0.529988509 | 3.67E-33    |
| RP13-20L14.1 | BRINP1   | -0.354364089 | 1.96E-14    |
| RP13-20L14.1 | GPRC5B   | -0.467493988 | 3.21E-25    |
| RP13-20L14.1 | AQP5     | 0.036119007  | 0.450329444 |
| RP13-20L14.1 | PLAG1    | -0.176546852 | 0.000200994 |
| RP13-20L14.1 | PTPRU    | -0.38108869  | 1.27E-16    |
| RP13-20L14.1 | ANGPTL4  | -0.317102928 | 1.04E-11    |
| RP13-20L14.1 | PALM3    | -0.142264201 | 0.002812908 |
| RP13-20L14.1 | ACP5     | -0.291059194 | 5.10E-10    |
| RP13-20L14.1 | DLG4     | -0.092647288 | 0.052402102 |
| RP13-20L14.1 | ETNK2    | -0.236892813 | 5.14E-07    |
| RP13-20L14.1 | CD109    | -0.350754926 | 3.73E-14    |
| RP13-20L14.1 | SNX22    | -0.085146544 | 0.074721611 |
| RP13-20L14.1 | TMEM98   | -0.288679848 | 7.14E-10    |

|              |          |              |             |
|--------------|----------|--------------|-------------|
| RP13-20L14.1 | CTHRC1   | -0.228454032 | 1.32E-06    |
| RP13-20L14.1 | S100A2   | -0.301496178 | 1.12E-10    |
| RP13-20L14.1 | C11orf80 | -0.424037078 | 1.38E-20    |
| RP13-20L14.1 | SREBF1   | -0.266496063 | 1.42E-08    |
| RP13-20L14.1 | PRSS22   | -0.305047467 | 6.60E-11    |
| RP13-20L14.1 | CMTM3    | -0.296681738 | 2.27E-10    |
| RP13-20L14.1 | RDH5     | -0.218233792 | 3.93E-06    |
| RP13-20L14.1 | MYH10    | -0.433061687 | 1.71E-21    |
| RP13-20L14.1 | EVPL     | -0.344991954 | 1.03E-13    |
| RP13-20L14.1 | SCD      | -0.46569664  | 5.15E-25    |
| RP13-20L14.1 | CD151    | -0.21755562  | 4.21E-06    |
| RP13-20L14.1 | S100A4   | -0.291938648 | 4.50E-10    |
| RP13-20L14.1 | BNIP1    | -0.169761303 | 0.000353295 |
| RP13-20L14.1 | MAP3K6   | -0.362044554 | 4.83E-15    |
| RP13-20L14.1 | MANEAL   | -0.464038729 | 7.95E-25    |
| RP13-20L14.1 | CD207    | -0.306623183 | 5.21E-11    |
| RP13-20L14.1 | CD1A     | -0.348758466 | 5.31E-14    |
| RP13-20L14.1 | C3       | -0.248221164 | 1.37E-07    |
| RP13-20L14.1 | NT5E     | -0.354599414 | 1.88E-14    |
| RP13-20L14.1 | CACNG4   | -0.37787867  | 2.39E-16    |
| RP13-20L14.1 | FHOD1    | -0.189084736 | 6.71E-05    |
| RP13-20L14.1 | LEMD1    | -0.375517921 | 3.78E-16    |
| RP13-20L14.1 | ATP11A   | -0.212477344 | 7.10E-06    |
| RP13-20L14.1 | PPAP2C   | -0.170412382 | 0.000334987 |
| RP13-20L14.1 | DRAM1    | -0.404751517 | 9.80E-19    |
| RP13-20L14.1 | CDA      | -0.086325721 | 0.07077129  |
| RP13-20L14.1 | CCND2    | -0.227355283 | 1.49E-06    |
| RP13-20L14.1 | LCN6     | 0.040255701  | 0.400131206 |
| RP13-20L14.1 | CDH4     | -0.381844311 | 1.09E-16    |
| RP13-20L14.1 | MMP11    | -0.336379694 | 4.49E-13    |
| RP13-20L14.1 | B3GAT1   | -0.249733824 | 1.15E-07    |
| RP13-20L14.1 | SPP1     | -0.315971838 | 1.24E-11    |
| RP13-20L14.1 | HLA-DQB1 | -0.327505727 | 1.96E-12    |
| RP13-20L14.1 | SDC3     | -0.2869869   | 9.06E-10    |
| RP13-20L14.1 | CX3CL1   | -0.316264611 | 1.18E-11    |
| RP13-20L14.1 | SDK1     | -0.184707612 | 9.92E-05    |
| RP13-20L14.1 | DOCK9    | -0.486823379 | 1.67E-27    |
| RP13-20L14.1 | CSF2     | -0.363613788 | 3.61E-15    |
| RP13-20L14.1 | GRHL3    | -0.495766994 | 1.31E-28    |
| RP13-20L14.1 | TMEM92   | -0.428738104 | 4.68E-21    |
| RP13-20L14.1 | BASP1    | -0.333355084 | 7.46E-13    |
| RP13-20L14.1 | HRH1     | -0.385373047 | 5.42E-17    |
| RP13-20L14.1 | ESM1     | 0.027736398  | 0.562186628 |
| RP13-20L14.1 | B4GALNT3 | -0.381837502 | 1.10E-16    |
| RP13-20L14.1 | LMO3     | -0.233825223 | 7.27E-07    |
| RP13-20L14.1 | C9orf16  | -0.323040799 | 4.03E-12    |
| RP13-20L14.1 | SEMA3F   | -0.053016568 | 0.267674841 |
| RP13-20L14.1 | PLA2G12B | -0.262497116 | 2.37E-08    |
| RP13-20L14.1 | KLK6     | -0.210665842 | 8.53E-06    |
| RP13-20L14.1 | ST3GAL5  | -0.217661012 | 4.17E-06    |
| RP13-20L14.1 | FAM132B  | -0.17127992  | 0.000311964 |

|              |          |              |             |
|--------------|----------|--------------|-------------|
| RP13-20L14.1 | CDKN1A   | -0.263330598 | 2.13E-08    |
| RP13-20L14.1 | E2F1     | -0.413627329 | 1.43E-19    |
| RP13-20L14.1 | B3GNT8   | -0.216959294 | 4.48E-06    |
| RP13-20L14.1 | MTMR11   | -0.337727953 | 3.58E-13    |
| RP13-20L14.1 | MYO1G    | -0.292234399 | 4.31E-10    |
| RP13-20L14.1 | TMSB10   | -0.2338143   | 7.28E-07    |
| RP13-20L14.1 | UNC5CL   | -0.405558203 | 8.25E-19    |
| RP13-20L14.1 | ABR      | -0.50922958  | 2.44E-30    |
| RP13-20L14.1 | PLP2     | -0.357913535 | 1.03E-14    |
| RP13-20L14.1 | SRCIN1   | -0.390197983 | 2.05E-17    |
| RP13-20L14.1 | PDE9A    | -0.385118431 | 5.70E-17    |
| RP13-20L14.1 | TREM2    | -0.243716661 | 2.34E-07    |
| RP13-20L14.1 | KDEL3    | -0.371548466 | 8.10E-16    |
| RP13-20L14.1 | PC       | -0.384885376 | 5.98E-17    |
| RP13-20L14.1 | C2CD4A   | -0.551866187 | 2.35E-36    |
| RP13-20L14.1 | PELI1    | -0.379523122 | 1.73E-16    |
| RP13-20L14.1 | SSX1     | -0.175310369 | 0.000223099 |
| RP13-20L14.1 | MROH6    | -0.309223026 | 3.51E-11    |
| RP13-20L14.1 | ESPN     | -0.23305102  | 7.93E-07    |
| RP13-20L14.1 | BMP1     | -0.136596976 | 0.004139698 |
| RP13-20L14.1 | TM4SF4   | -0.318328431 | 8.54E-12    |
| RP13-20L14.1 | CORO2A   | -0.481004235 | 8.43E-27    |
| RP13-20L14.1 | CD164L2  | -0.361333983 | 5.51E-15    |
| RP13-20L14.1 | CTSS     | -0.454709715 | 8.71E-24    |
| RP13-20L14.1 | CLU      | -0.178818395 | 0.000165632 |
| RP13-20L14.1 | TMSB4X   | -0.297724316 | 1.95E-10    |
| RP13-20L14.1 | WNT10A   | -0.232069941 | 8.84E-07    |
| RP13-20L14.1 | NAPSA    | -0.215148471 | 5.41E-06    |
| RP13-20L14.1 | PLEKHA4  | -0.232841511 | 8.11E-07    |
| RP13-20L14.1 | SFTPA1   | -0.032991203 | 0.490534248 |
| RP13-20L14.1 | C1orf116 | -0.3998758   | 2.76E-18    |
| RP13-20L14.1 | TM4SF1   | -0.318973327 | 7.71E-12    |
| RP13-20L14.1 | SEL1L3   | -0.367038998 | 1.90E-15    |
| RP13-20L14.1 | VASN     | -0.285334804 | 1.14E-09    |
| RP13-20L14.1 | NPTXR    | -0.539899948 | 1.40E-34    |
| RP13-20L14.1 | PDE4C    | -0.349728661 | 4.48E-14    |
| RP13-20L14.1 | CDC42EP1 | -0.284399179 | 1.30E-09    |
| RP13-20L14.1 | ENDOD1   | -0.571013872 | 2.38E-39    |
| RP13-20L14.1 | RYR1     | -0.315162032 | 1.40E-11    |
| RP13-20L14.1 | IL1RAP   | -0.445372332 | 8.89E-23    |
| RP13-20L14.1 | SLC35F2  | -0.475417879 | 3.87E-26    |
| RP13-20L14.1 | ISYNA1   | -0.039294542 | 0.411485678 |
| RP13-20L14.1 | HLA-G    | -0.417648133 | 5.85E-20    |
| RP13-20L14.1 | CDKN2B   | -0.485774276 | 2.24E-27    |
| RP13-20L14.1 | ALDH1A3  | -0.445922558 | 7.76E-23    |
| RP13-20L14.1 | CLIP3    | -0.198592478 | 2.78E-05    |
| RP13-20L14.1 | ULBP2    | -0.422329945 | 2.04E-20    |
| RP13-20L14.1 | ETHE1    | -0.43998029  | 3.29E-22    |
| RP13-20L14.1 | XPR1     | -0.44925143  | 3.41E-23    |
| RP13-20L14.1 | SPTBN2   | -0.615249382 | 4.50E-47    |
| RP13-20L14.1 | IVL      | -0.470041162 | 1.64E-25    |

|              |          |              |             |
|--------------|----------|--------------|-------------|
| RP13-20L14.1 | MARCO    | -0.387244155 | 3.72E-17    |
| RP13-20L14.1 | PLXND1   | -0.148661089 | 0.001788431 |
| RP13-20L14.1 | EMILIN2  | -0.39298358  | 1.16E-17    |
| RP13-20L14.1 | PLAUR    | -0.344656201 | 1.09E-13    |
| RP13-20L14.1 | CDC42EP5 | -0.213481339 | 6.41E-06    |
| RP13-20L14.1 | TRPC5    | -0.210263382 | 8.88E-06    |
| RP13-20L14.1 | TMEM100  | -0.268361781 | 1.12E-08    |
| RP13-20L14.1 | QSOX1    | -0.407373281 | 5.58E-19    |
| RP13-20L14.1 | ARHGAP23 | -0.288128487 | 7.72E-10    |
| RP13-20L14.1 | MDF1     | -0.133314487 | 0.005145461 |
| RP13-20L14.1 | FSTL3    | -0.266647556 | 1.39E-08    |
| RP13-20L14.1 | INF2     | -0.30049814  | 1.30E-10    |
| RP13-20L14.1 | TGFBR1   | -0.49098986  | 5.14E-28    |
| RP13-20L14.1 | TGFBI    | -0.215446066 | 5.24E-06    |
| RP13-20L14.1 | ERBB3    | -0.518657746 | 1.35E-31    |
| RP13-20L14.1 | CCL18    | -0.272426983 | 6.56E-09    |
| RP13-20L14.1 | CCL17    | -0.313721158 | 1.76E-11    |
| RP13-20L14.1 | C16orf45 | -0.229349514 | 1.19E-06    |
| RP13-20L14.1 | PRDM1    | -0.228044377 | 1.38E-06    |
| RP13-20L14.1 | TRIM47   | -0.402811188 | 1.48E-18    |
| RP13-20L14.1 | CNFN     | -0.276189908 | 3.98E-09    |
| RP13-20L14.1 | ARMCX3   | -0.263761956 | 2.02E-08    |
| RP13-20L14.1 | RAMP1    | -0.109863296 | 0.021318156 |
| RP13-20L14.1 | GABRD    | 0.050603745  | 0.290091389 |
| RP13-20L14.1 | COL13A1  | -0.058813584 | 0.218759711 |
| RP13-20L14.1 | S100A5   | -0.296791812 | 2.24E-10    |
| RP13-20L14.1 | MISP     | -0.310565895 | 2.86E-11    |
| RP13-20L14.1 | HES6     | -0.190699526 | 5.79E-05    |
| RP13-20L14.1 | PSD3     | -0.55756235  | 3.17E-37    |
| RP13-20L14.1 | DOK7     | -0.27219946  | 6.76E-09    |
| RP13-20L14.1 | ZMAT3    | -0.568459628 | 6.13E-39    |
| RP13-20L14.1 | MFAP2    | -0.085374635 | 0.073943799 |
| RP13-20L14.1 | TMEM79   | -0.372373308 | 6.92E-16    |
| RP13-20L14.1 | SLC1A5   | -0.230871678 | 1.01E-06    |
| RP13-20L14.1 | BBC3     | -0.281726918 | 1.88E-09    |
| RP13-20L14.1 | HLA-DQB2 | -0.300912618 | 1.22E-10    |
| RP13-20L14.1 | C1QL1    | -0.167001379 | 0.000441749 |
| RP13-20L14.1 | TMEM215  | -0.145757512 | 0.002201441 |
| RP13-20L14.1 | PNP      | -0.337573481 | 3.67E-13    |
| RP13-20L14.1 | ARNTL    | -0.289792356 | 6.10E-10    |
| RP13-20L14.1 | CLDN2    | -0.239390894 | 3.87E-07    |
| RP13-20L14.1 | MVP      | -0.431476686 | 2.48E-21    |
| RP13-20L14.1 | LGALS1   | -0.22669626  | 1.60E-06    |
| RP13-20L14.1 | BIRC7    | -0.295400783 | 2.73E-10    |
| RP13-20L14.1 | COL8A1   | -0.496262608 | 1.13E-28    |
| RP13-20L14.1 | PERP     | -0.555775925 | 5.97E-37    |
| RP13-20L14.1 | GJA4     | -0.064225484 | 0.179199529 |
| RP13-20L14.1 | IGFL2    | -0.329637017 | 1.38E-12    |
| RP13-20L14.1 | DAPK2    | -0.267425305 | 1.26E-08    |
| RP13-20L14.1 | MAMLD1   | -0.402983249 | 1.43E-18    |
| RP13-20L14.1 | ETV5     | -0.271064256 | 7.85E-09    |

|              |           |              |             |
|--------------|-----------|--------------|-------------|
| RP13-20L14.1 | RUNX1     | -0.53254559  | 1.60E-33    |
| RP13-20L14.1 | LONRF2    | -0.235689947 | 5.89E-07    |
| RP13-20L14.1 | SPOCK1    | -0.07969521  | 0.095376739 |
| RP13-20L14.1 | XKRX      | -0.301558449 | 1.11E-10    |
| RP13-20L14.1 | TGFB1     | -0.104996231 | 0.027826308 |
| RP13-20L14.1 | ERP27     | -0.189749291 | 6.31E-05    |
| RP13-20L14.1 | TNFRSF10C | -0.455015254 | 8.06E-24    |
| RP13-20L14.1 | PALM      | -0.247565262 | 1.49E-07    |
| RP13-20L14.1 | TSC22D1   | -0.128527991 | 0.007007769 |
| RP13-20L14.1 | TGM2      | -0.476765837 | 2.69E-26    |
| RP13-20L14.1 | UBE2QL1   | -0.18891069  | 6.81E-05    |
| RP13-20L14.1 | ECE1      | -0.366687358 | 2.03E-15    |
| RP13-20L14.1 | COL8A2    | -0.352861217 | 2.56E-14    |
| RP13-20L14.1 | HIST3H2A  | -0.324470478 | 3.20E-12    |
| RP13-20L14.1 | TNFRSF21  | -0.448674679 | 3.94E-23    |
| RP13-20L14.1 | SOX4      | -0.375458061 | 3.82E-16    |
| RP13-20L14.1 | ELF3      | -0.437767472 | 5.59E-22    |
| RP13-20L14.1 | TPD52L1   | -0.40736321  | 5.59E-19    |
| RP13-20L14.1 | INHBB     | -0.171606311 | 0.000303692 |
| RP13-20L14.1 | HPN       | -0.221684795 | 2.73E-06    |
| RP13-20L14.1 | MMP7      | -0.397679516 | 4.37E-18    |
| RP13-20L14.1 | RAB27A    | -0.468434293 | 2.51E-25    |
| RP13-20L14.1 | IGF2BP2   | -0.306883255 | 5.00E-11    |
| RP13-20L14.1 | ITGB4     | -0.324453456 | 3.21E-12    |
| RP13-20L14.1 | PPP1R1B   | -0.255881345 | 5.42E-08    |
| RP13-20L14.1 | NPDC1     | -0.044715805 | 0.349944712 |
| RP13-20L14.1 | CCL13     | -0.381538907 | 1.16E-16    |
| RP13-20L14.1 | SPINT1    | -0.538162886 | 2.51E-34    |
| RP13-20L14.1 | HEY2      | -0.183765604 | 0.000107784 |
| RP13-20L14.1 | CST2      | -0.408248204 | 4.62E-19    |
| RP13-20L14.1 | ADM       | -0.338547972 | 3.11E-13    |
| RP13-20L14.1 | VSTM2L    | -0.426848066 | 7.25E-21    |
| RP13-20L14.1 | FAM84A    | -0.384380825 | 6.61E-17    |
| RP13-20L14.1 | P4HA2     | -0.458122987 | 3.66E-24    |
| RP13-20L14.1 | LPL       | -0.254963309 | 6.07E-08    |
| RP13-20L14.1 | TMEM173   | -0.235001988 | 6.37E-07    |
| RP13-20L14.1 | DHRS3     | -0.254051373 | 6.79E-08    |
| RP13-20L14.1 | SCN1B     | -0.366786652 | 2.00E-15    |
| RP13-20L14.1 | GLT1D1    | -0.242240031 | 2.78E-07    |
| RP13-20L14.1 | PHYHIP    | -0.340475677 | 2.24E-13    |
| RP13-20L14.1 | BHLHE40   | -0.466515667 | 4.16E-25    |
| RP13-20L14.1 | BID       | -0.350466693 | 3.93E-14    |
| RP13-20L14.1 | POSTN     | -0.362346831 | 4.57E-15    |
| RP13-20L14.1 | ITGA3     | -0.591351798 | 9.41E-43    |
| RP13-20L14.1 | RSP04     | -0.295897323 | 2.54E-10    |
| RP13-20L14.1 | ADAMTS9   | -0.077197137 | 0.106254569 |
| RP13-20L14.1 | ABTB2     | -0.502368142 | 1.90E-29    |
| RP13-20L14.1 | KCNQ3     | -0.539798385 | 1.45E-34    |
| RP13-20L14.1 | ANXA1     | -0.310657528 | 2.82E-11    |
| RP13-20L14.1 | S100A11   | -0.411243443 | 2.41E-19    |
| RP13-20L14.1 | CEACAM6   | -0.460613942 | 1.93E-24    |



|              |            |              |             |
|--------------|------------|--------------|-------------|
| RP13-20L14.1 | IER5L      | -0.290336482 | 5.65E-10    |
| RP13-20L14.1 | KRT80      | -0.483881608 | 3.80E-27    |
| RP13-20L14.1 | CDH6       | -0.441162871 | 2.47E-22    |
| RP13-20L14.1 | UNC5B      | -0.368395342 | 1.47E-15    |
| RP13-20L14.1 | PLEKHN1    | -0.345576223 | 9.28E-14    |
| RP13-20L14.1 | SYTL1      | -0.17903301  | 0.000162612 |
| RP13-20L14.1 | TMEM163    | -0.295843988 | 2.56E-10    |
| RP13-20L14.1 | C4orf48    | -0.048090778 | 0.314741521 |
| RP13-20L14.1 | B3GNT7     | -0.287073143 | 8.95E-10    |
| RP13-20L14.1 | BAIAP3     | -0.19455905  | 4.06E-05    |
| RP13-20L14.1 | PHLDA2     | -0.353870886 | 2.14E-14    |
| RP13-20L14.1 | GAP43      | -0.29475908  | 3.00E-10    |
| RP13-20L14.1 | S100A1     | -0.428641441 | 4.79E-21    |
| RP13-20L14.1 | PTPRE      | -0.51396572  | 5.75E-31    |
| RP13-20L14.1 | CCND1      | -0.440488245 | 2.91E-22    |
| RP13-20L14.1 | ST6GALNAC5 | -0.493894108 | 2.24E-28    |
| RP13-20L14.1 | KRT17      | -0.130767051 | 0.006072262 |
| RP13-20L14.1 | HPCAL4     | -0.213174382 | 6.62E-06    |
| RP13-20L14.1 | GABBR2     | -0.290486699 | 5.53E-10    |
| RP13-20L14.1 | DIRAS3     | -0.182450538 | 0.000120957 |
| RP13-20L14.1 | SERINC2    | -0.448233392 | 4.39E-23    |
| RP13-20L14.1 | PTCHD4     | -0.301175745 | 1.17E-10    |
| RP13-20L14.1 | EPS8       | -0.427211337 | 6.67E-21    |
| RP13-20L14.1 | LY6E       | -0.277023403 | 3.56E-09    |
| RP13-20L14.1 | UPP1       | -0.378686932 | 2.04E-16    |
| RP13-20L14.1 | AHNAK2     | -0.535977586 | 5.17E-34    |
| RP13-20L14.1 | PLXNC1     | -0.360799418 | 6.07E-15    |
| RP13-20L14.1 | TNC        | -0.442665743 | 1.72E-22    |
| RP13-20L14.1 | DUSP4      | -0.331444968 | 1.02E-12    |
| RP13-20L14.1 | NRCAM      | -0.425839106 | 9.14E-21    |
| RP13-20L14.1 | NRP2       | -0.30864358  | 3.83E-11    |
| RP13-20L14.1 | CTSC       | -0.490312681 | 6.24E-28    |
| RP13-20L14.1 | AMIGO2     | -0.2284285   | 1.32E-06    |
| RP13-20L14.1 | NAB2       | -0.207002747 | 1.23E-05    |
| RP13-20L14.1 | TBC1D2     | -0.549950823 | 4.58E-36    |
| RP13-20L14.1 | PHLDA3     | -0.329061082 | 1.52E-12    |
| RP13-20L14.1 | PTP4A3     | -0.223644699 | 2.22E-06    |
| RP13-20L14.1 | CRABP2     | -0.24464264  | 2.10E-07    |
| RP13-20L14.1 | GOS2       | -0.195697233 | 3.65E-05    |
| RP13-20L14.1 | S100A6     | -0.422955492 | 1.77E-20    |
| RP13-20L14.1 | FOXQ1      | -0.368159024 | 1.54E-15    |
| RP13-20L14.1 | LRG1       | -0.343739017 | 1.28E-13    |
| RP13-20L14.1 | LAMP5      | -0.177481626 | 0.000185663 |
| RP13-20L14.1 | ALDH3B1    | -0.44425032  | 1.17E-22    |
| RP13-20L14.1 | CDH2       | -0.007206836 | 0.880313802 |
| RP13-20L14.1 | SCG5       | -0.098303875 | 0.039512305 |
| RP13-20L14.1 | ZCCHC16    | -0.18627519  | 8.63E-05    |
| RP13-20L14.1 | GRB7       | -0.316982926 | 1.06E-11    |
| RP13-20L14.1 | TIAM1      | -0.270384523 | 8.58E-09    |
| RP13-20L14.1 | FXYD5      | -0.179633876 | 0.000154427 |
| RP13-20L14.1 | CLDN9      | -0.266125841 | 1.49E-08    |

|              |         |              |             |
|--------------|---------|--------------|-------------|
| RP13-20L14.1 | FAM43A  | -0.354622961 | 1.87E-14    |
| RP13-20L14.1 | CHST2   | -0.309529559 | 3.35E-11    |
| RP13-20L14.1 | HMG2    | -0.278448827 | 2.93E-09    |
| RP13-20L14.1 | GALNT7  | -0.488513064 | 1.04E-27    |
| RP13-20L14.1 | CBLN1   | -0.336853323 | 4.15E-13    |
| RP13-20L14.1 | STRA6   | -0.307455751 | 4.59E-11    |
| RP13-20L14.1 | MUC21   | -0.521097324 | 6.27E-32    |
| RP13-20L14.1 | PRR36   | -0.209688342 | 9.41E-06    |
| RP13-20L14.1 | NFE2L3  | -0.401470589 | 1.97E-18    |
| RP13-20L14.1 | NR1D1   | -0.327061177 | 2.11E-12    |
| RP13-20L14.1 | MUC1    | -0.465034639 | 6.13E-25    |
| RP13-20L14.1 | NAT8L   | -0.089219548 | 0.061796419 |
| RP13-20L14.1 | APOC1   | 0.014692403  | 0.758859428 |
| RP13-20L14.1 | EVA1A   | -0.388244745 | 3.04E-17    |
| RP13-20L14.1 | ENTPD1  | -0.231101187 | 9.84E-07    |
| RP13-20L14.1 | COL1A1  | -0.30119688  | 1.17E-10    |
| RP13-20L14.1 | FNDC4   | -0.345371112 | 9.62E-14    |
| RP13-20L14.1 | FRMD3   | -0.229501433 | 1.17E-06    |
| RP13-20L14.1 | SHROOM4 | -0.389250017 | 2.48E-17    |
| RP13-20L14.1 | NELL2   | -0.138987812 | 0.003522952 |
| RP13-20L14.1 | EPHB3   | -0.439540705 | 3.66E-22    |
| RP13-20L14.1 | TMC6    | -0.360000109 | 7.04E-15    |
| RP13-20L14.1 | NOD1    | -0.236850258 | 5.17E-07    |
| RP13-20L14.1 | GGCT    | -0.380369099 | 1.46E-16    |
| RP13-20L14.1 | ICAM1   | -0.488525263 | 1.03E-27    |
| RP13-20L14.1 | PRSS23  | -0.355382979 | 1.63E-14    |
| RP13-20L14.1 | CFI     | -0.357624308 | 1.09E-14    |
| RP13-20L14.1 | CD55    | -0.458126249 | 3.65E-24    |
| RP13-20L14.1 | RASD2   | -0.261195371 | 2.80E-08    |
| RP13-20L14.1 | KLK11   | -0.22189647  | 2.67E-06    |
| RP13-20L14.1 | ICAM5   | -0.165483188 | 0.000498792 |
| RP13-20L14.1 | ADORA1  | -0.458662858 | 3.19E-24    |
| RP13-20L14.1 | ITGA2   | -0.539931438 | 1.39E-34    |
| RP13-20L14.1 | ABCC3   | -0.235684273 | 5.90E-07    |
| RP13-20L14.1 | MFGE8   | -0.3673156   | 1.81E-15    |
| RP13-20L14.1 | STK32A  | -0.353158813 | 2.43E-14    |
| RP13-20L14.1 | CYSLTR2 | -0.196853572 | 3.27E-05    |
| RP13-20L14.1 | LAD1    | -0.491378947 | 4.60E-28    |
| RP13-20L14.1 | MGAT3   | -0.353853865 | 2.15E-14    |
| RP13-20L14.1 | IGFBP6  | -0.190957688 | 5.66E-05    |
| RP13-20L14.1 | CYP2S1  | -0.455731867 | 6.72E-24    |
| RP13-20L14.1 | KCNJ2   | -0.264886521 | 1.75E-08    |
| RP13-20L14.1 | FAM20A  | -0.276518427 | 3.80E-09    |
| RP13-20L14.1 | TGFA    | -0.445481412 | 8.65E-23    |
| RP13-20L14.1 | MXRA8   | -0.242209392 | 2.79E-07    |
| RP13-20L14.1 | C8orf4  | -0.273235371 | 5.90E-09    |
| RP13-20L14.1 | CLDN10  | -0.308620914 | 3.85E-11    |
| RP13-20L14.1 | PDE5A   | -0.46765924  | 3.08E-25    |
| RP13-20L14.1 | APOE    | 0.02318778   | 0.628018353 |
| RP13-20L14.1 | SPOCK2  | -0.347941669 | 6.13E-14    |
| RP13-20L14.1 | TENM1   | -0.072234751 | 0.130751359 |

|              |           |              |             |
|--------------|-----------|--------------|-------------|
| RP13-20L14.1 | SLIT1     | -0.158244861 | 0.000877448 |
| RP13-20L14.1 | CXCL14    | -0.04781219  | 0.317556343 |
| RP13-20L14.1 | ECM1      | -0.158490683 | 0.000861107 |
| RP13-20L14.1 | DUSP5     | -0.429768844 | 3.69E-21    |
| RP13-20L14.1 | SEZ6L2    | -0.396489053 | 5.60E-18    |
| RP13-20L14.1 | THRSP     | -0.317673438 | 9.47E-12    |
| RP13-20L14.1 | C19orf33  | -0.33732156  | 3.83E-13    |
| RP13-20L14.1 | MPZL2     | -0.497865199 | 7.10E-29    |
| RP13-20L14.1 | CTSH      | -0.358823769 | 8.73E-15    |
| RP13-20L14.1 | CYP1B1    | -0.473155965 | 7.13E-26    |
| RP13-20L14.1 | ALOX5     | -0.480931609 | 8.60E-27    |
| RP13-20L14.1 | SYTL5     | -0.397943995 | 4.14E-18    |
| RP13-20L14.1 | TNFRSF12A | -0.24072964  | 3.31E-07    |
| RP13-20L14.1 | DUSP6     | -0.317003635 | 1.05E-11    |
| RP13-20L14.1 | ALOX15B   | -0.522574434 | 3.94E-32    |
| RP13-20L14.1 | SDC4      | -0.351329266 | 3.37E-14    |
| RP13-20L14.1 | MDK       | -0.201943479 | 2.02E-05    |
| RP13-20L14.1 | KRT19     | -0.427863693 | 5.74E-21    |
| RP13-20L14.1 | MET       | -0.610427566 | 3.58E-46    |
| RP13-20L14.1 | TESC      | -0.074074652 | 0.121203698 |
| RP13-20L14.1 | CXCL17    | -0.527604074 | 7.92E-33    |
| RP13-20L14.1 | NPC2      | -0.312849495 | 2.01E-11    |
| RP13-20L14.1 | COMP      | -0.271088086 | 7.83E-09    |
| RP13-20L14.1 | TUSC3     | -0.257835008 | 4.26E-08    |
| RP13-20L14.1 | TMPRSS4   | -0.455648319 | 6.87E-24    |
| RP13-20L14.1 | LGALS3    | -0.426138687 | 8.54E-21    |
| RP13-20L14.1 | CRLF1     | -0.213290413 | 6.54E-06    |
| RP13-20L14.1 | CTXN1     | -0.238447317 | 4.31E-07    |
| RP13-20L14.1 | PCSK1N    | -0.085332222 | 0.074087928 |
| RP13-20L14.1 | NMU       | -0.371989947 | 7.44E-16    |
| RP13-20L14.1 | GALE      | -0.305173711 | 6.47E-11    |
| RP13-20L14.1 | PCSK2     | -0.171562338 | 0.000304794 |
| RP13-20L14.1 | GJB3      | -0.315619489 | 1.31E-11    |
| RP13-20L14.1 | SLPI      | -0.376838945 | 2.92E-16    |
| RP13-20L14.1 | AGR2      | -0.208574557 | 1.05E-05    |
| RP13-20L14.1 | MRC2      | -0.259077165 | 3.65E-08    |
| RP13-20L14.1 | GOLT1A    | -0.23178787  | 9.12E-07    |
| RP13-20L14.1 | SLC27A6   | -0.335869056 | 4.89E-13    |
| RP13-20L14.1 | KCNN4     | -0.374327396 | 4.75E-16    |
| RP13-20L14.1 | ETV4      | -0.140529697 | 0.003170703 |
| RP13-20L14.1 | SYT12     | -0.374334914 | 4.75E-16    |
| RP13-20L14.1 | PVRL4     | -0.506644271 | 5.31E-30    |
| RP13-20L14.1 | PLCD3     | -0.392889252 | 1.18E-17    |
| RP13-20L14.1 | PLAU      | -0.435346706 | 9.95E-22    |
| RP13-20L14.1 | LRRK2     | -0.221115136 | 2.90E-06    |
| RP13-20L14.1 | SFN       | -0.397609363 | 4.44E-18    |
| RP13-20L14.1 | LPAR5     | -0.397421699 | 4.61E-18    |
| RP13-20L14.1 | NGEF      | -0.446320865 | 7.04E-23    |
| RP13-20L14.1 | DTX4      | -0.454757092 | 8.60E-24    |
| RP13-20L14.1 | CST6      | -0.285115508 | 1.18E-09    |
| RP13-20L14.1 | QPCT      | -0.317593862 | 9.59E-12    |

|              |          |              |             |
|--------------|----------|--------------|-------------|
| RP13-20L14.1 | TIMP1    | -0.268094257 | 1.16E-08    |
| RP13-20L14.1 | CAMK2N1  | -0.292185462 | 4.34E-10    |
| RP13-20L14.1 | KLHDC8A  | -0.15493457  | 0.001127272 |
| RP13-20L14.1 | PDLIM4   | -0.394671989 | 8.17E-18    |
| RP13-20L14.1 | SCEL     | -0.475186367 | 4.12E-26    |
| RP13-20L14.1 | LCN2     | -0.568263311 | 6.60E-39    |
| RP13-20L14.1 | PROS1    | -0.598324161 | 5.63E-44    |
| RP13-20L14.1 | GABRB2   | -0.49409816  | 2.11E-28    |
| RP13-20L14.1 | TMPRSS6  | -0.42709871  | 6.84E-21    |
| RP13-20L14.1 | KLK7     | -0.309847628 | 3.19E-11    |
| RP13-20L14.1 | PDZK1IP1 | -0.433521131 | 1.53E-21    |
| RP13-20L14.1 | CDH3     | -0.281228467 | 2.01E-09    |
| RP13-20L14.1 | LRP4     | -0.203434862 | 1.74E-05    |
| RP13-20L14.1 | IGSF1    | -0.206322022 | 1.32E-05    |
| RP13-20L14.1 | B3GNT3   | -0.522754296 | 3.72E-32    |
| RP13-20L14.1 | CLDN1    | -0.472183743 | 9.25E-26    |
| RP13-20L14.1 | GDF15    | -0.516761389 | 2.43E-31    |
| RP13-20L14.1 | ARHGAP36 | -0.23986057  | 3.66E-07    |
| RP13-20L14.1 | LAMB3    | -0.386927693 | 3.97E-17    |
| RP13-20L14.1 | KLK10    | -0.344923867 | 1.04E-13    |
| RP13-20L14.1 | DPP4     | -0.559812757 | 1.42E-37    |
| RP13-20L14.1 | METTL7B  | -0.28867389  | 7.15E-10    |
| RP13-20L14.1 | LIPH     | -0.53003234  | 3.62E-33    |
| RP13-20L14.1 | CLDN16   | -0.469897874 | 1.70E-25    |
| RP13-20L14.1 | CHI3L1   | -0.485339656 | 2.53E-27    |
| RP13-20L14.1 | SLC22A31 | -0.224829842 | 1.95E-06    |
| RP13-20L14.1 | TACSTD2  | -0.439619147 | 3.59E-22    |
| RP13-20L14.1 | SFTPB    | -0.428155614 | 5.36E-21    |
| RP13-20L14.1 | RXRG     | -0.220254974 | 3.18E-06    |
| RP13-20L14.1 | DCSTAMP  | -0.493322726 | 2.64E-28    |
| RP13-20L14.1 | CITED1   | -0.364424185 | 3.11E-15    |
| RP13-20L14.1 | SERPINA1 | -0.471259183 | 1.18E-25    |
| RP13-20L14.1 | PRR15    | -0.17279797  | 0.000275194 |
| RP13-20L14.1 | SLC34A2  | -0.594862661 | 2.30E-43    |
| RP13-20L14.1 | FN1      | -0.615289667 | 4.42E-47    |
| RP13-20L14.1 | ZCCHC12  | -0.174275735 | 0.000243322 |
| LINC01508    | TFF3     | 0.706256578  | 0           |
| LINC01508    | CCL21    | 0.361065055  | 5.79E-15    |
| LINC01508    | TPO      | 0.714522846  | 0           |
| LINC01508    | MT1G     | 0.648830411  | 0           |
| LINC01508    | DIO1     | 0.636138825  | 0           |
| LINC01508    | DPT      | 0.291225633  | 4.98E-10    |
| LINC01508    | CDH16    | 0.619098086  | 0           |
| LINC01508    | CRABP1   | 0.667912801  | 4.94E-58    |
| LINC01508    | SLC26A7  | 0.742699076  | 0           |
| LINC01508    | MT1H     | 0.610580144  | 3.36E-46    |
| LINC01508    | SLC26A4  | 0.718855545  | 0           |
| LINC01508    | SLC5A8   | 0.692844395  | 4.79E-64    |
| LINC01508    | PKHD1L1  | 0.654088262  | 6.07E-55    |
| LINC01508    | TFCP2L1  | 0.64798648   | 0           |
| LINC01508    | WSCD2    | 0.730466642  | 2.21E-74    |

|           |           |             |             |
|-----------|-----------|-------------|-------------|
| LINC01508 | IPCEF1    | 0.626622971 | 0           |
| LINC01508 | SLC5A5    | 0.533881773 | 1.03E-33    |
| LINC01508 | MT1F      | 0.689008899 | 0           |
| LINC01508 | FOSB      | 0.406579257 | 0           |
| LINC01508 | SEMA3D    | 0.638050599 | 1.48E-51    |
| LINC01508 | BMP8A     | 0.561171802 | 0           |
| LINC01508 | MATN2     | 0.66065282  | 0           |
| LINC01508 | PLA2R1    | 0.607309435 | 0           |
| LINC01508 | COL23A1   | 0.655715753 | 0           |
| LINC01508 | HGD       | 0.717558444 | 0           |
| LINC01508 | TCEAL2    | 0.471056999 | 0           |
| LINC01508 | CHRD1     | 0.318318915 | 8.55E-12    |
| LINC01508 | TNFRSF11B | 0.513763733 | 0           |
| LINC01508 | FAM167A   | 0.667235055 | 0           |
| LINC01508 | KIT       | 0.688007671 | 0           |
| LINC01508 | SLC4A4    | 0.728015386 | 0           |
| LINC01508 | SMOC2     | 0.462390041 | 0           |
| LINC01508 | FHL1      | 0.701854804 | 0           |
| LINC01508 | OTOS      | 0.638216029 | 0           |
| LINC01508 | IGFBPL1   | 0.679947305 | 7.34E-61    |
| LINC01508 | HBB       | 0.352342157 | 3.76E-14    |
| LINC01508 | BEX1      | 0.437551806 | 0           |
| LINC01508 | FABP4     | 0.55117066  | 3.00E-36    |
| LINC01508 | LMOD1     | 0.640023318 | 0           |
| LINC01508 | SOD3      | 0.566903866 | 0           |
| LINC01508 | TMEM171   | 0.663272551 | 0           |
| LINC01508 | PI16      | 0.373969057 | 4.12E-16    |
| LINC01508 | ZMAT4     | 0.651291381 | 2.45E-54    |
| LINC01508 | MFAP4     | 0.215417271 | 5.54E-06    |
| LINC01508 | CWH43     | 0.632454486 | 2.02E-50    |
| LINC01508 | SPX       | 0.695430717 | 0           |
| LINC01508 | APOD      | 0.216298221 | 5.06E-06    |
| LINC01508 | DPP6      | 0.588503391 | 0           |
| LINC01508 | MMRN1     | 0.40579972  | 0           |
| LINC01508 | WDR72     | 0.603606776 | 0           |
| LINC01508 | MPPED2    | 0.731744427 | 0           |
| LINC01508 | PAPSS2    | 0.463886564 | 0           |
| LINC01508 | DCN       | 0.136245628 | 0.004265489 |
| LINC01508 | SORBS2    | 0.736706882 | 0           |
| LINC01508 | EGR2      | 0.410945997 | 0           |
| LINC01508 | EDN3      | 0.515336724 | 3.77E-31    |
| LINC01508 | DIO2      | 0.647619406 | 0           |
| LINC01508 | ITPR1     | 0.643932775 | 0           |
| LINC01508 | CFD       | 0.233866736 | 7.79E-07    |
| LINC01508 | CPXM1     | 0.404875226 | 0           |
| LINC01508 | ELMO1     | 0.662685771 | 0           |
| LINC01508 | GPC3      | 0.452014174 | 1.71E-23    |
| LINC01508 | MYOC      | 0.303366765 | 8.49E-11    |
| LINC01508 | DEPTOR    | 0.657536516 | 0           |
| LINC01508 | DGKI      | 0.651791261 | 0           |
| LINC01508 | CARTPT    | 0.576981141 | 2.53E-40    |

|           |            |             |             |
|-----------|------------|-------------|-------------|
| LINC01508 | IYD        | 0.636096415 | 0           |
| LINC01508 | LYVE1      | 0.381196652 | 3.16E-17    |
| LINC01508 | CLCNKB     | 0.68156174  | 0           |
| LINC01508 | NCAM1      | 0.433130884 | 0           |
| LINC01508 | HBA2       | 0.29138155  | 5.88E-10    |
| LINC01508 | GLT8D2     | 0.533884323 | 0           |
| LINC01508 | OGDHL      | 0.577874684 | 0           |
| LINC01508 | LIFR       | 0.57830516  | 0           |
| LINC01508 | CSGALNACT1 | 0.539213286 | 0           |
| LINC01508 | RAP1GAP    | 0.650009645 | 0           |
| LINC01508 | COL9A3     | 0.568926747 | 0           |
| LINC01508 | FBLN1      | 0.173162429 | 0.000272373 |
| LINC01508 | EFEMP1     | 0.41107748  | 0           |
| LINC01508 | AOX1       | 0.497722397 | 7.40E-29    |
| LINC01508 | GRIN2C     | 0.718151465 | 0           |
| LINC01508 | C11orf74   | 0.689139815 | 0           |
| LINC01508 | PPARGC1A   | 0.669575652 | 0           |
| LINC01508 | ANGPTL1    | 0.63979028  | 0           |
| LINC01508 | SCARA5     | 0.277912647 | 3.15E-09    |
| LINC01508 | LTF        | 0.537926823 | 0           |
| LINC01508 | CA4        | 0.592150801 | 6.84E-43    |
| LINC01508 | TG         | 0.691894433 | 0           |
| LINC01508 | FCGBP      | 0.627197412 | 0           |
| LINC01508 | PBX4       | 0.667508801 | 0           |
| LINC01508 | CYR61      | 0.422116806 | 0           |
| LINC01508 | FOS        | 0.444824789 | 0           |
| LINC01508 | KHDRBS2    | 0.632755867 | 0           |
| LINC01508 | MUM1L1     | 0.455690364 | 0           |
| LINC01508 | RGS16      | 0.623708644 | 0           |
| LINC01508 | MT1M       | 0.540915615 | 0           |
| LINC01508 | LRP2       | 0.682271351 | 0           |
| LINC01508 | MAFB       | 0.573308379 | 0           |
| LINC01508 | KCNK2      | 0.575879177 | 0           |
| LINC01508 | TBC1D4     | 0.589243072 | 0           |
| LINC01508 | MIOX       | 0.692073244 | 7.51E-64    |
| LINC01508 | TPPP       | 0.667019463 | 0           |
| LINC01508 | FMOD       | 0.553279842 | 0           |
| LINC01508 | CITED2     | 0.485864511 | 0           |
| LINC01508 | RGS8       | 0.63295675  | 1.60E-50    |
| LINC01508 | ABI3BP     | 0.379922103 | 6.03E-17    |
| LINC01508 | ADH1B      | 0.357939335 | 1.03E-14    |
| LINC01508 | OGN        | 0.229612136 | 1.16E-06    |
| LINC01508 | NR4A1      | 0.368216852 | 1.62E-15    |
| LINC01508 | FOXJ1      | 0.597391435 | 8.24E-44    |
| LINC01508 | ALDH1A1    | 0.663313259 | 0           |
| LINC01508 | OCA2       | 0.535184224 | 6.72E-34    |
| LINC01508 | TMEM139    | 0.453668901 | 0           |
| LINC01508 | ARHGAP24   | 0.666109861 | 0           |
| LINC01508 | SLC25A15   | 0.615270044 | 0           |
| LINC01508 | DES        | 0.237827759 | 4.62E-07    |
| LINC01508 | GDF10      | 0.457561084 | 4.22E-24    |

|           |          |             |             |
|-----------|----------|-------------|-------------|
| LINC01508 | KIAA1324 | 0.55739326  | 0           |
| LINC01508 | JUN      | 0.491859542 | 0           |
| LINC01508 | C7       | 0.104286318 | 0.028945212 |
| LINC01508 | LGI3     | 0.645976081 | 0           |
| LINC01508 | CDON     | 0.665051189 | 0           |
| LINC01508 | BCL2     | 0.657441343 | 0           |
| LINC01508 | HLF      | 0.672162477 | 0           |
| LINC01508 | EGR1     | 0.425871802 | 0           |
| LINC01508 | IP6K3    | 0.583928435 | 0           |
| LINC01508 | SCUBE3   | 0.586746029 | 0           |
| LINC01508 | PKNOX2   | 0.581779886 | 0           |
| LINC01508 | SMAD9    | 0.545212146 | 0           |
| LINC01508 | IQGAP2   | 0.675375088 | 0           |
| LINC01508 | GNA14    | 0.731411677 | 0           |
| LINC01508 | LAYN     | 0.529044557 | 0           |
| LINC01508 | AVPR1A   | 0.638370632 | 0           |
| LINC01508 | PDLIM3   | 0.437400749 | 0           |
| LINC01508 | GPM6A    | 0.604468295 | 0           |
| LINC01508 | SDPR     | 0.514149956 | 0           |
| LINC01508 | CRYAB    | 0.352410238 | 3.71E-14    |
| LINC01508 | FOXA2    | 0.557702154 | 3.02E-37    |
| LINC01508 | C8orf88  | 0.539073718 | 0           |
| LINC01508 | ISM1     | 0.43281402  | 0           |
| LINC01508 | BMP2     | 0.417084282 | 0           |
| LINC01508 | ID4      | 0.641280279 | 0           |
| LINC01508 | NUPR1    | 0.419896062 | 0           |
| LINC01508 | SERTM1   | 0.511562071 | 1.20E-30    |
| LINC01508 | IRS1     | 0.574052173 | 0           |
| LINC01508 | FIBIN    | 0.253320549 | 8.24E-08    |
| LINC01508 | PODN     | 0.172348    | 0.000291285 |
| LINC01508 | TDRD9    | 0.502159187 | 0           |
| LINC01508 | EPHA3    | 0.388276452 | 0           |
| LINC01508 | AIF1L    | 0.545314978 | 0           |
| LINC01508 | EBF4     | 0.643510809 | 0           |
| LINC01508 | ADM2     | 0.596207701 | 0           |
| LINC01508 | GSTM3    | 0.628415225 | 0           |
| LINC01508 | HSD17B6  | 0.564601423 | 0           |
| LINC01508 | AGR3     | 0.494946313 | 1.66E-28    |
| LINC01508 | EPHB1    | 0.522257083 | 0           |
| LINC01508 | TMOD1    | 0.452587251 | 0           |
| LINC01508 | WASF3    | 0.6575507   | 0           |
| LINC01508 | SELV     | 0.644729773 | 6.09E-53    |
| LINC01508 | ENPP1    | 0.491637425 | 0           |
| LINC01508 | SYNE1    | 0.680670814 | 4.91E-61    |
| LINC01508 | PLCH1    | 0.635398718 | 0           |
| LINC01508 | CCDC146  | 0.676060303 | 0           |
| LINC01508 | SLC16A2  | 0.63499817  | 0           |
| LINC01508 | IER2     | 0.505897021 | 0           |
| LINC01508 | KCNAB1   | 0.593915329 | 0           |
| LINC01508 | SYNDIG1  | 0.520060735 | 0           |
| LINC01508 | C16orf89 | 0.680867589 | 0           |

|           |          |              |             |
|-----------|----------|--------------|-------------|
| LINC01508 | CTGF     | 0.298962461  | 2.00E-10    |
| LINC01508 | NR4A3    | 0.21269726   | 7.30E-06    |
| LINC01508 | KIAA1456 | 0.648827574  | 0           |
| LINC01508 | AQP4     | 0.545154134  | 0           |
| LINC01508 | RNF150   | 0.560505025  | 0           |
| LINC01508 | C1S      | 0.042212716  | 0.377455887 |
| LINC01508 | PFKFB2   | 0.546169121  | 0           |
| LINC01508 | PROX1    | 0.631132541  | 0           |
| LINC01508 | TCF7L1   | 0.646518749  | 0           |
| LINC01508 | HSPB6    | 0.289748863  | 7.38E-10    |
| LINC01508 | FHDC1    | 0.565138277  | 0           |
| LINC01508 | PRR15L   | 0.581544152  | 0           |
| LINC01508 | SLC1A1   | 0.54297041   | 0           |
| LINC01508 | BTBD11   | 0.65019304   | 0           |
| LINC01508 | TRIM58   | 0.542110451  | 0           |
| LINC01508 | LRIG1    | 0.607929972  | 0           |
| LINC01508 | ROR2     | 0.421459107  | 0           |
| LINC01508 | GPR125   | 0.682867635  | 0           |
| LINC01508 | FLRT1    | 0.669332968  | 0           |
| LINC01508 | PGF      | 0.617761271  | 0           |
| LINC01508 | DUSP1    | 0.38663951   | 0           |
| LINC01508 | PLA2G7   | 0.446024731  | 0           |
| LINC01508 | PLSCR4   | 0.513269998  | 0           |
| LINC01508 | FAM46B   | 0.459631025  | 0           |
| LINC01508 | GLDC     | 0.483269743  | 0           |
| LINC01508 | ZBTB16   | 0.390889234  | 0           |
| LINC01508 | OMD      | 0.144635006  | 0.002383216 |
| LINC01508 | HSD11B2  | 0.625837903  | 0           |
| LINC01508 | FGL2     | 0.162058993  | 0.000663194 |
| LINC01508 | CLCNKA   | 0.659827705  | 3.32E-56    |
| LINC01508 | GATM     | 0.593491094  | 0           |
| LINC01508 | TNS3     | 0.458479591  | 0           |
| LINC01508 | TOB1     | 0.473725806  | 0           |
| LINC01508 | MARC2    | 0.688555304  | 0           |
| LINC01508 | LRRC2    | 0.620564966  | 0           |
| LINC01508 | SORD     | 0.50982676   | 0           |
| LINC01508 | RIMS4    | 0.575999314  | 0           |
| LINC01508 | SLC29A4  | 0.639472706  | 0           |
| LINC01508 | SLC39A14 | 0.577793695  | 0           |
| LINC01508 | FAXDC2   | 0.660057813  | 0           |
| LINC01508 | HSPB8    | 0.370634466  | 9.37E-16    |
| LINC01508 | CCL19    | -0.025513125 | 0.593949112 |
| LINC01508 | KCNIP3   | 0.627767739  | 0           |
| LINC01508 | CGNL1    | 0.669739474  | 0           |
| LINC01508 | ATF3     | 0.204404752  | 1.65E-05    |
| LINC01508 | SGCD     | 0.453293316  | 0           |
| LINC01508 | STARD13  | 0.603183109  | 0           |
| LINC01508 | LDHD     | 0.689539653  | 0           |
| LINC01508 | RCAN1    | 0.465195721  | 0           |
| LINC01508 | ID3      | 0.50144603   | 0           |
| LINC01508 | SYTL3    | 0.682317165  | 0           |



|           |          |             |             |
|-----------|----------|-------------|-------------|
| LINC01508 | MT1E     | 0.518823206 | 0           |
| LINC01508 | CAMK1D   | 0.559007793 | 0           |
| LINC01508 | PRKCQ    | 0.648811547 | 0           |
| LINC01508 | NUAK2    | 0.45545151  | 0           |
| LINC01508 | LIPG     | 0.645740489 | 0           |
| LINC01508 | SLC25A25 | 0.406636559 | 0           |
| LINC01508 | PRKX     | 0.338529206 | 4.25E-13    |
| LINC01508 | SRPX     | 0.177474845 | 0.000189958 |
| LINC01508 | FAM189A1 | 0.554028458 | 0           |
| LINC01508 | PLEKHH1  | 0.652506688 | 0           |
| LINC01508 | WNT11    | 0.473548793 | 0           |
| LINC01508 | SNAI1    | 0.401690415 | 0           |
| LINC01508 | FDCSP    | 0.024241075 | 0.612482349 |
| LINC01508 | MT1X     | 0.455885815 | 0           |
| LINC01508 | ACACB    | 0.636229884 | 0           |
| LINC01508 | ARC      | 0.223428516 | 2.41E-06    |
| LINC01508 | KLK4     | 0.295904492 | 2.54E-10    |
| LINC01508 | ZFPM2    | 0.370436461 | 9.81E-16    |
| LINC01508 | AKAP12   | 0.410816641 | 0           |
| LINC01508 | GJB6     | 0.513480983 | 6.68E-31    |
| LINC01508 | ERO1LB   | 0.664658584 | 0           |
| LINC01508 | DNALI1   | 0.590470389 | 0           |
| LINC01508 | HKDC1    | 0.452126848 | 0           |
| LINC01508 | ZFP36L2  | 0.58811263  | 0           |
| LINC01508 | CAPSL    | 0.579412208 | 1.00E-40    |
| LINC01508 | CYP7B1   | 0.533186626 | 0           |
| LINC01508 | CPQ      | 0.656426357 | 0           |
| LINC01508 | RPS6KA6  | 0.643099505 | 1.34E-52    |
| LINC01508 | TLE1     | 0.516234678 | 0           |
| LINC01508 | TP53INP2 | 0.631187858 | 0           |
| LINC01508 | KATNAL2  | 0.696946956 | 0           |
| LINC01508 | SGPP2    | 0.238756996 | 4.51E-07    |
| LINC01508 | CTH      | 0.626635453 | 0           |
| LINC01508 | KIF12    | 0.490446276 | 0           |
| LINC01508 | TMEM220  | 0.663155394 | 0           |
| LINC01508 | CENPJ    | 0.661747235 | 0           |
| LINC01508 | FAM155B  | 0.424292587 | 0           |
| LINC01508 | WFS1     | 0.605229961 | 0           |
| LINC01508 | SELENBP1 | 0.595636239 | 0           |
| LINC01508 | SNTA1    | 0.565129058 | 0           |
| LINC01508 | FRAS1    | 0.324387051 | 4.30E-12    |
| LINC01508 | FBLN7    | 0.600708193 | 0           |
| LINC01508 | AGPAT9   | 0.67150336  | 0           |
| LINC01508 | GPR83    | 0.548585458 | 0           |
| LINC01508 | PRTG     | 0.61817345  | 0           |
| LINC01508 | EGR3     | 0.202684693 | 1.95E-05    |
| LINC01508 | GRAMD2   | 0.485593461 | 0           |
| LINC01508 | HYOU1    | 0.590170545 | 0           |
| LINC01508 | FBLN5    | 0.318264509 | 1.12E-11    |
| LINC01508 | ITM2A    | 0.582544672 | 0           |
| LINC01508 | SRF      | 0.433636108 | 0           |

|           |          |              |             |
|-----------|----------|--------------|-------------|
| LINC01508 | FGFR2    | 0.522062482  | 0           |
| LINC01508 | MT1A     | 0.2742226    | 5.17E-09    |
| LINC01508 | MAMDC2   | 0.402341589  | 0           |
| LINC01508 | FHL2     | 0.310033559  | 3.94E-11    |
| LINC01508 | FTCDNL1  | 0.54857326   | 0           |
| LINC01508 | PKIA     | 0.481362743  | 0           |
| LINC01508 | DNAJB4   | 0.516361197  | 0           |
| LINC01508 | SLC25A33 | 0.603037017  | 0           |
| LINC01508 | EYA2     | 0.460185466  | 0           |
| LINC01508 | LPAR1    | 0.267350794  | 1.45E-08    |
| LINC01508 | STX11    | 0.361396613  | 6.72E-15    |
| LINC01508 | ARHGEF28 | 0.57189398   | 0           |
| LINC01508 | OR2W3    | 0.56280378   | 0           |
| LINC01508 | ALDH1B1  | 0.479455689  | 1.29E-26    |
| LINC01508 | CXCL12   | 0.233852694  | 7.80E-07    |
| LINC01508 | OLFM2    | 0.469517498  | 0           |
| LINC01508 | TUB      | 0.510396662  | 0           |
| LINC01508 | HTRA3    | 0.305507252  | 7.73E-11    |
| LINC01508 | CKB      | 0.504597934  | 0           |
| LINC01508 | RGS2     | 0.070206827  | 0.141892143 |
| LINC01508 | SHANK2   | 0.668903911  | 0           |
| LINC01508 | CNTFR    | 0.466642547  | 4.02E-25    |
| LINC01508 | CYTH3    | 0.621231458  | 0           |
| LINC01508 | PLAC9    | 0.356849173  | 1.62E-14    |
| LINC01508 | WWOX     | 0.670383272  | 0           |
| LINC01508 | NPR3     | 0.462536275  | 0           |
| LINC01508 | SDC2     | 0.554148311  | 0           |
| LINC01508 | KLF15    | 0.548700488  | 0           |
| LINC01508 | TMEM164  | 0.603526638  | 0           |
| LINC01508 | LONRF3   | 0.35740404   | 1.46E-14    |
| LINC01508 | GBP1     | 0.184305012  | 0.000105529 |
| LINC01508 | ARHGAP6  | 0.617988352  | 0           |
| LINC01508 | TMEM119  | 0.072394806  | 0.129862195 |
| LINC01508 | SH3RF1   | 0.581538621  | 0           |
| LINC01508 | CRELD2   | 0.584787968  | 0           |
| LINC01508 | PCP4     | 0.057948837  | 0.225523183 |
| LINC01508 | GCSH     | 0.72036923   | 0           |
| LINC01508 | IMPA2    | 0.61396883   | 0           |
| LINC01508 | C1R      | -0.001400074 | 0.976655816 |
| LINC01508 | SUCNR1   | 0.418214441  | 0           |
| LINC01508 | SFRP1    | 0.425859888  | 0           |
| LINC01508 | UGT8     | 0.536159958  | 0           |
| LINC01508 | TLE4     | 0.279772465  | 2.87E-09    |
| LINC01508 | ANTXR1   | 0.382373191  | 1.27E-17    |
| LINC01508 | GPX3     | 0.518781789  | 0           |
| LINC01508 | DPY19L2  | 0.650436007  | 0           |
| LINC01508 | FAM46C   | 0.455158616  | 0           |
| LINC01508 | IL33     | 0.275941808  | 4.11E-09    |
| LINC01508 | PEG3     | 0.619885424  | 0           |
| LINC01508 | FAHD2A   | 0.656617411  | 0           |
| LINC01508 | PTGDS    | 0.051019951  | 0.286015128 |

|           |          |             |             |
|-----------|----------|-------------|-------------|
| LINC01508 | CHCHD10  | 0.463192272 | 0           |
| LINC01508 | CD36     | 0.538084546 | 0           |
| LINC01508 | ANKRD37  | 0.530038268 | 0           |
| LINC01508 | TSPAN33  | 0.489358244 | 0           |
| LINC01508 | PRDM16   | 0.573174485 | 0           |
| LINC01508 | UST      | 0.632921533 | 0           |
| LINC01508 | NEXN     | 0.523842964 | 0           |
| LINC01508 | NUPR1L   | 0.267188698 | 1.30E-08    |
| LINC01508 | SLC24A3  | 0.530122803 | 0           |
| LINC01508 | MARC1    | 0.646875328 | 0           |
| LINC01508 | MYH11    | 0.33601032  | 6.48E-13    |
| LINC01508 | APOA1    | 0.562761745 | 4.91E-38    |
| LINC01508 | TMEM178B | 0.478368135 | 0           |
| LINC01508 | CAPN6    | 0.242446352 | 2.71E-07    |
| LINC01508 | PPM1L    | 0.6137148   | 0           |
| LINC01508 | FZD8     | 0.627596683 | 0           |
| LINC01508 | RCAN2    | 0.628581742 | 0           |
| LINC01508 | COPZ2    | 0.57235651  | 0           |
| LINC01508 | GAS1     | 0.239411858 | 4.19E-07    |
| LINC01508 | DACT1    | 0.415700094 | 0           |
| LINC01508 | WBSCR17  | 0.642482774 | 0           |
| LINC01508 | NCS1     | 0.462461527 | 0           |
| LINC01508 | SPIRE2   | 0.558473208 | 0           |
| LINC01508 | C15orf52 | 0.468093595 | 0           |
| LINC01508 | SPAG5    | 0.47768292  | 0           |
| LINC01508 | ARL4D    | 0.543165862 | 0           |
| LINC01508 | FAM189A2 | 0.576344971 | 0           |
| LINC01508 | MAP1LC3A | 0.582822672 | 0           |
| LINC01508 | KLF6     | 0.137293662 | 0.003977098 |
| LINC01508 | ADD3     | 0.432482263 | 0           |
| LINC01508 | TSPAN7   | 0.505373074 | 0           |
| LINC01508 | KLF9     | 0.395722334 | 0           |
| LINC01508 | KCNQ1    | 0.648707864 | 0           |
| LINC01508 | MAN1A1   | 0.147886769 | 0.001909263 |
| LINC01508 | MLF1     | 0.376778567 | 1.87E-16    |
| LINC01508 | RARB     | 0.583001103 | 0           |
| LINC01508 | CDC42EP2 | 0.578795065 | 0           |
| LINC01508 | FAM3B    | 0.290932636 | 6.26E-10    |
| LINC01508 | GADD45B  | 0.202113515 | 2.06E-05    |
| LINC01508 | TMEM47   | 0.557951815 | 0           |
| LINC01508 | SDF2L1   | 0.51746781  | 0           |
| LINC01508 | CCDC85A  | 0.356316717 | 1.80E-14    |
| LINC01508 | CRYBG3   | 0.244231058 | 2.41E-07    |
| LINC01508 | FBLN2    | 0.05422703  | 0.256776988 |
| LINC01508 | PEBP4    | 0.344471047 | 1.53E-13    |
| LINC01508 | CDADC1   | 0.657678353 | 0           |
| LINC01508 | FAM63A   | 0.616134399 | 0           |
| LINC01508 | GLUL     | 0.458764684 | 0           |
| LINC01508 | FREM2    | 0.547005676 | 0           |
| LINC01508 | ACKR3    | 0.509728325 | 0           |
| LINC01508 | DENND6A  | 0.62329604  | 0           |

|           |          |              |             |
|-----------|----------|--------------|-------------|
| LINC01508 | CLDN8    | 0.352173512  | 3.88E-14    |
| LINC01508 | UTS2R    | 0.244745373  | 2.07E-07    |
| LINC01508 | SCNN1B   | 0.508774754  | 0           |
| LINC01508 | TTC30A   | 0.633445054  | 0           |
| LINC01508 | CORO2B   | 0.576130087  | 0           |
| LINC01508 | TC2N     | 0.425745567  | 0           |
| LINC01508 | ALDH2    | 0.572004754  | 0           |
| LINC01508 | GPR183   | 0.018510171  | 0.6988239   |
| LINC01508 | C4orf47  | 0.576150654  | 0           |
| LINC01508 | SLC25A42 | 0.640205295  | 0           |
| LINC01508 | LGMN     | 0.575478771  | 0           |
| LINC01508 | ACSF2    | 0.621025653  | 0           |
| LINC01508 | KIAA1467 | 0.612268912  | 0           |
| LINC01508 | PRKG1    | 0.601599639  | 0           |
| LINC01508 | GNAI1    | 0.581319624  | 0           |
| LINC01508 | ABCC4    | 0.344376441  | 1.56E-13    |
| LINC01508 | PRPS1    | 0.607615236  | 0           |
| LINC01508 | TSPAN5   | 0.488961383  | 0           |
| LINC01508 | CR2      | 0.144291218  | 0.002441567 |
| LINC01508 | CCDC170  | 0.603394304  | 0           |
| LINC01508 | RRAD     | 0.069865709  | 0.143842235 |
| LINC01508 | SCGB2A1  | 0.471216565  | 0           |
| LINC01508 | SESN3    | 0.277331022  | 3.98E-09    |
| LINC01508 | SGK223   | 0.320913318  | 7.43E-12    |
| LINC01508 | NDRG2    | 0.62039774   | 0           |
| LINC01508 | C3orf52  | 0.369875779  | 1.12E-15    |
| LINC01508 | FLRT3    | -0.278608691 | 3.36E-09    |
| LINC01508 | MST1R    | -0.566772666 | 0           |
| LINC01508 | SDC1     | -0.287198632 | 1.05E-09    |
| LINC01508 | ST8SIA4  | -0.516056247 | 0           |
| LINC01508 | UBTD1    | -0.365020836 | 3.22E-15    |
| LINC01508 | EPHA2    | -0.347188788 | 9.51E-14    |
| LINC01508 | TMEM130  | -0.286785034 | 1.11E-09    |
| LINC01508 | SPINK2   | -0.425489835 | 0           |
| LINC01508 | MMP16    | -0.465822358 | 0           |
| LINC01508 | SIGLEC15 | -0.518685624 | 0           |
| LINC01508 | RIN1     | -0.564574616 | 0           |
| LINC01508 | IL1RN    | -0.407444038 | 0           |
| LINC01508 | FCER1G   | -0.359095022 | 1.06E-14    |
| LINC01508 | CD276    | -0.610974932 | 0           |
| LINC01508 | CTSB     | -0.375966265 | 2.38E-16    |
| LINC01508 | FAM171A2 | -0.185578852 | 9.44E-05    |
| LINC01508 | ASPHD1   | -0.590794487 | 0           |
| LINC01508 | C15orf48 | -0.348649001 | 7.33E-14    |
| LINC01508 | DYSF     | -0.188943654 | 6.99E-05    |
| LINC01508 | PDZRN4   | -0.202637178 | 1.96E-05    |
| LINC01508 | EFHD2    | -0.243122885 | 2.74E-07    |
| LINC01508 | ASF1B    | -0.378325301 | 1.13E-16    |
| LINC01508 | AQP1     | -0.134935336 | 0.004652595 |
| LINC01508 | ARRDC2   | -0.463256382 | 0           |
| LINC01508 | PRSS1    | -0.336884183 | 4.12E-13    |

|           |          |              |             |
|-----------|----------|--------------|-------------|
| LINC01508 | MAPK13   | -0.4648034   | 0           |
| LINC01508 | CST5     | -0.502532136 | 1.81E-29    |
| LINC01508 | AHR      | -0.430297546 | 0           |
| LINC01508 | BAX      | -0.434317636 | 0           |
| LINC01508 | C1orf115 | -0.261505828 | 3.03E-08    |
| LINC01508 | PLK3     | -0.417310371 | 0           |
| LINC01508 | JAG2     | -0.219881736 | 3.50E-06    |
| LINC01508 | RAD23B   | -0.429000162 | 0           |
| LINC01508 | CA12     | 0.091896277  | 0.054375607 |
| LINC01508 | ADTRP    | -0.293874905 | 4.14E-10    |
| LINC01508 | UCP2     | -0.267802688 | 1.37E-08    |
| LINC01508 | IGFBP2   | -0.302230673 | 1.25E-10    |
| LINC01508 | LOXL2    | -0.318252737 | 1.12E-11    |
| LINC01508 | GPX1     | -0.40461538  | 0           |
| LINC01508 | P3H3     | -0.50195948  | 0           |
| LINC01508 | C2orf81  | -0.386623198 | 0           |
| LINC01508 | CDT1     | -0.403769747 | 0           |
| LINC01508 | SNX25    | -0.201704173 | 2.15E-05    |
| LINC01508 | MTHFD1L  | -0.488741394 | 0           |
| LINC01508 | CDC42BPG | -0.483152177 | 4.66E-27    |
| LINC01508 | MSN      | -0.508953753 | 0           |
| LINC01508 | SIGLEC6  | -0.470599802 | 1.41E-25    |
| LINC01508 | F2R      | -0.157134833 | 0.000967161 |
| LINC01508 | TMEM184A | -0.501391139 | 0           |
| LINC01508 | CKS2     | -0.263416374 | 2.39E-08    |
| LINC01508 | TAX1BP3  | -0.510366876 | 0           |
| LINC01508 | PMEPA1   | -0.491372473 | 0           |
| LINC01508 | CXCL16   | -0.587393941 | 0           |
| LINC01508 | FAXC     | -0.542581351 | 0           |
| LINC01508 | VTCN1    | -0.484423532 | 3.27E-27    |
| LINC01508 | SH2D4A   | -0.425220344 | 0           |
| LINC01508 | RNF24    | -0.385051643 | 0           |
| LINC01508 | LY6G6C   | -0.460225202 | 2.13E-24    |
| LINC01508 | NID1     | -0.339001381 | 3.92E-13    |
| LINC01508 | STAC     | -0.63662334  | 0           |
| LINC01508 | RAB34    | -0.514884389 | 0           |
| LINC01508 | HES4     | -0.285317871 | 1.36E-09    |
| LINC01508 | EPHA10   | -0.619689263 | 0           |
| LINC01508 | ENTPD2   | -0.511900844 | 0           |
| LINC01508 | DDB2     | -0.468148628 | 0           |
| LINC01508 | NKAIN4   | -0.372575507 | 5.88E-16    |
| LINC01508 | TRIM29   | -0.442947716 | 0           |
| LINC01508 | ADCY8    | -0.577258437 | 2.28E-40    |
| LINC01508 | SFTA2    | -0.287407416 | 1.02E-09    |
| LINC01508 | NRIP1    | -0.49058244  | 0           |
| LINC01508 | VWA1     | -0.133275984 | 0.005188238 |
| LINC01508 | APLNR    | -0.090574213 | 0.057951098 |
| LINC01508 | REN      | -0.472868311 | 7.70E-26    |
| LINC01508 | EDIL3    | -0.213019088 | 7.06E-06    |
| LINC01508 | AGRN     | -0.408960135 | 0           |
| LINC01508 | TREM1    | -0.421278406 | 0           |

|           |          |              |             |
|-----------|----------|--------------|-------------|
| LINC01508 | SRL      | -0.271133733 | 8.94E-09    |
| LINC01508 | RASGRF1  | -0.506849599 | 0           |
| LINC01508 | RMI2     | -0.403032478 | 0           |
| LINC01508 | SAMD1    | -0.46029383  | 0           |
| LINC01508 | MGAT4B   | -0.600826627 | 0           |
| LINC01508 | NXN      | -0.50843165  | 0           |
| LINC01508 | SH3BGRL3 | -0.517325264 | 0           |
| LINC01508 | CA11     | -0.317874599 | 1.19E-11    |
| LINC01508 | PLD3     | -0.340186431 | 3.20E-13    |
| LINC01508 | LURAP1L  | -0.462966467 | 0           |
| LINC01508 | CARNS1   | -0.258964674 | 4.15E-08    |
| LINC01508 | PDLIM7   | -0.505266271 | 0           |
| LINC01508 | BCL2L1   | -0.56700613  | 0           |
| LINC01508 | GGT6     | -0.243924265 | 2.50E-07    |
| LINC01508 | DPYSL3   | -0.312189625 | 2.85E-11    |
| LINC01508 | FYN      | -0.527549735 | 0           |
| LINC01508 | TK1      | -0.367909491 | 1.74E-15    |
| LINC01508 | AK1      | -0.258405694 | 4.44E-08    |
| LINC01508 | HIGD1B   | -0.020001589 | 0.675883093 |
| LINC01508 | TMEM59L  | -0.437163172 | 0           |
| LINC01508 | MEGF9    | -0.328728827 | 2.14E-12    |
| LINC01508 | ZFP36L1  | -0.430953685 | 0           |
| LINC01508 | ADRA1B   | -0.242818928 | 2.84E-07    |
| LINC01508 | EPHA4    | -0.438543815 | 0           |
| LINC01508 | TCERG1L  | -0.093827248 | 0.049484699 |
| LINC01508 | NGFR     | -0.317337887 | 1.30E-11    |
| LINC01508 | EBI3     | -0.5156635   | 0           |
| LINC01508 | S100A10  | -0.50677556  | 0           |
| LINC01508 | S100B    | -0.444524236 | 0           |
| LINC01508 | CD44     | -0.270734036 | 9.41E-09    |
| LINC01508 | BHLHE41  | -0.369626004 | 1.18E-15    |
| LINC01508 | FBXO2    | -0.42988792  | 0           |
| LINC01508 | SLC30A2  | -0.352051532 | 3.97E-14    |
| LINC01508 | FRMD5    | -0.540320325 | 0           |
| LINC01508 | SAMD11   | -0.335212203 | 7.40E-13    |
| LINC01508 | SIPA1L2  | -0.451900759 | 0           |
| LINC01508 | S100A16  | -0.517120876 | 0           |
| LINC01508 | PPL      | -0.504732112 | 0           |
| LINC01508 | ARHGD1B  | -0.18966135  | 6.56E-05    |
| LINC01508 | CDC42EP3 | -0.549630372 | 0           |
| LINC01508 | RUNX2    | -0.543829659 | 0           |
| LINC01508 | LAMC2    | -0.556867045 | 0           |
| LINC01508 | BRINP1   | -0.543406417 | 0           |
| LINC01508 | GPRC5B   | -0.418286068 | 0           |
| LINC01508 | AQP5     | -0.135847775 | 0.004379831 |
| LINC01508 | PLAG1    | -0.366250847 | 2.48E-15    |
| LINC01508 | PTPRU    | -0.53579643  | 0           |
| LINC01508 | ANGPTL4  | -0.385382974 | 0           |
| LINC01508 | PALM3    | -0.31477333  | 1.92E-11    |
| LINC01508 | ACP5     | -0.420871901 | 0           |
| LINC01508 | DLG4     | -0.345185055 | 1.35E-13    |

|           |          |              |             |
|-----------|----------|--------------|-------------|
| LINC01508 | ETNK2    | -0.462029207 | 0           |
| LINC01508 | CD109    | -0.482059021 | 0           |
| LINC01508 | SNX22    | -0.317244275 | 1.31E-11    |
| LINC01508 | TMEM98   | -0.446479886 | 0           |
| LINC01508 | CTHRC1   | -0.466952658 | 0           |
| LINC01508 | S100A2   | -0.428209703 | 0           |
| LINC01508 | C11orf80 | -0.533470584 | 0           |
| LINC01508 | SREBF1   | -0.495106193 | 0           |
| LINC01508 | PRSS22   | -0.548237674 | 0           |
| LINC01508 | CMTM3    | -0.5290047   | 0           |
| LINC01508 | RDH5     | -0.363473251 | 4.43E-15    |
| LINC01508 | MYH10    | -0.462819665 | 0           |
| LINC01508 | EVPL     | -0.435730334 | 0           |
| LINC01508 | SCD      | -0.532786929 | 0           |
| LINC01508 | CD151    | -0.478670532 | 0           |
| LINC01508 | S100A4   | -0.494713588 | 0           |
| LINC01508 | BNIP1    | -0.284561454 | 1.51E-09    |
| LINC01508 | MAP3K6   | -0.561288959 | 0           |
| LINC01508 | MANEAL   | -0.425487849 | 0           |
| LINC01508 | CD207    | -0.414675047 | 1.13E-19    |
| LINC01508 | CD1A     | -0.452881065 | 1.38E-23    |
| LINC01508 | C3       | -0.507798773 | 0           |
| LINC01508 | NT5E     | -0.462549182 | 0           |
| LINC01508 | CACNG4   | -0.522619989 | 3.88E-32    |
| LINC01508 | FHOD1    | -0.454078243 | 0           |
| LINC01508 | LEMD1    | -0.614841696 | 0           |
| LINC01508 | ATP11A   | -0.288184683 | 9.16E-10    |
| LINC01508 | PPAP2C   | -0.357460917 | 1.45E-14    |
| LINC01508 | DRAM1    | -0.528916478 | 0           |
| LINC01508 | CDA      | -0.218288338 | 4.13E-06    |
| LINC01508 | CCND2    | -0.252545409 | 9.05E-08    |
| LINC01508 | LCN6     | -0.19866383  | 2.76E-05    |
| LINC01508 | CDH4     | -0.43927229  | 0           |
| LINC01508 | MMP11    | -0.534305154 | 0           |
| LINC01508 | B3GAT1   | -0.339173855 | 3.81E-13    |
| LINC01508 | SPP1     | -0.280820641 | 2.50E-09    |
| LINC01508 | HLA-DQB1 | -0.362469328 | 5.42E-15    |
| LINC01508 | SDC3     | -0.597426507 | 0           |
| LINC01508 | CX3CL1   | -0.343139763 | 1.93E-13    |
| LINC01508 | SDK1     | -0.445074706 | 0           |
| LINC01508 | DOCK9    | -0.465490175 | 0           |
| LINC01508 | CSF2     | -0.553704116 | 1.24E-36    |
| LINC01508 | GRHL3    | -0.490575348 | 0           |
| LINC01508 | TMEM92   | -0.633546077 | 1.22E-50    |
| LINC01508 | BASP1    | -0.53664419  | 0           |
| LINC01508 | HRH1     | -0.536220097 | 0           |
| LINC01508 | ESM1     | -0.040524287 | 0.396845213 |
| LINC01508 | B4GALNT3 | -0.52885336  | 0           |
| LINC01508 | LMO3     | -0.156163391 | 0.001040596 |
| LINC01508 | C9orf16  | -0.499370101 | 0           |
| LINC01508 | SEMA3F   | -0.342592839 | 2.12E-13    |

|           |          |              |             |
|-----------|----------|--------------|-------------|
| LINC01508 | PLA2G12B | -0.287505234 | 8.42E-10    |
| LINC01508 | KLK6     | -0.478202116 | 1.82E-26    |
| LINC01508 | ST3GAL5  | -0.399794052 | 0           |
| LINC01508 | FAM132B  | -0.105309673 | 0.027401066 |
| LINC01508 | CDKN1A   | -0.231911652 | 9.67E-07    |
| LINC01508 | E2F1     | -0.39884502  | 0           |
| LINC01508 | B3GNT8   | -0.457941177 | 0           |
| LINC01508 | MTMR11   | -0.600609474 | 0           |
| LINC01508 | MYO1G    | -0.451155973 | 0           |
| LINC01508 | TMSB10   | -0.505765396 | 0           |
| LINC01508 | UNC5CL   | -0.606814565 | 0           |
| LINC01508 | ABR      | -0.557299506 | 0           |
| LINC01508 | PLP2     | -0.569145034 | 0           |
| LINC01508 | SRCIN1   | -0.472941447 | 0           |
| LINC01508 | PDE9A    | -0.47411217  | 0           |
| LINC01508 | TREM2    | -0.331958601 | 1.27E-12    |
| LINC01508 | KDELR3   | -0.313892947 | 2.20E-11    |
| LINC01508 | PC       | -0.421559669 | 0           |
| LINC01508 | C2CD4A   | -0.551067041 | 0           |
| LINC01508 | PELI1    | -0.505876738 | 0           |
| LINC01508 | SSX1     | -0.235578568 | 6.44E-07    |
| LINC01508 | MROH6    | -0.514812193 | 0           |
| LINC01508 | ESPN     | -0.520595177 | 0           |
| LINC01508 | BMP1     | -0.484372952 | 0           |
| LINC01508 | TM4SF4   | -0.452065611 | 1.69E-23    |
| LINC01508 | CORO2A   | -0.507770122 | 0           |
| LINC01508 | CD164L2  | -0.434798763 | 1.13E-21    |
| LINC01508 | CTSS     | -0.409980512 | 0           |
| LINC01508 | CLU      | -0.472385303 | 0           |
| LINC01508 | TMSB4X   | -0.486008334 | 0           |
| LINC01508 | WNT10A   | -0.521445296 | 5.62E-32    |
| LINC01508 | NAPSA    | -0.391745221 | 0           |
| LINC01508 | PLEKHA4  | -0.457412834 | 0           |
| LINC01508 | SFTPA1   | -0.117072893 | 0.014111936 |
| LINC01508 | C1orf116 | -0.397684793 | 0           |
| LINC01508 | TM4SF1   | -0.381737902 | 2.21E-17    |
| LINC01508 | SEL1L3   | -0.432147669 | 0           |
| LINC01508 | VASN     | -0.573981964 | 0           |
| LINC01508 | NPTXR    | -0.564270943 | 0           |
| LINC01508 | PDE4C    | -0.456286505 | 0           |
| LINC01508 | CDC42EP1 | -0.521116003 | 0           |
| LINC01508 | ENDOD1   | -0.58464528  | 0           |
| LINC01508 | RYR1     | -0.455440305 | 0           |
| LINC01508 | IL1RAP   | -0.531600745 | 0           |
| LINC01508 | SLC35F2  | -0.519555033 | 1.02E-31    |
| LINC01508 | ISYNA1   | -0.396567116 | 0           |
| LINC01508 | HLA-G    | -0.450612453 | 0           |
| LINC01508 | CDKN2B   | -0.548515533 | 0           |
| LINC01508 | ALDH1A3  | -0.422016101 | 0           |
| LINC01508 | CLIP3    | -0.559446495 | 0           |
| LINC01508 | ULBP2    | -0.393291955 | 0           |



|           |          |              |             |
|-----------|----------|--------------|-------------|
| LINC01508 | ETHE1    | -0.617852189 | 0           |
| LINC01508 | XPR1     | -0.545330722 | 0           |
| LINC01508 | SPTBN2   | -0.62238275  | 0           |
| LINC01508 | IVL      | -0.563032036 | 4.46E-38    |
| LINC01508 | MARCO    | -0.441993719 | 0           |
| LINC01508 | PLXND1   | -0.369039224 | 1.35E-15    |
| LINC01508 | EMILIN2  | -0.461428669 | 0           |
| LINC01508 | PLAUR    | -0.552551792 | 0           |
| LINC01508 | CDC42EP5 | -0.558840141 | 0           |
| LINC01508 | TRPC5    | -0.297016733 | 2.16E-10    |
| LINC01508 | TMEM100  | -0.49573978  | 0           |
| LINC01508 | QSOX1    | -0.609643932 | 0           |
| LINC01508 | ARHGAP23 | -0.518851999 | 0           |
| LINC01508 | MDFI     | -0.350012482 | 5.74E-14    |
| LINC01508 | FSTL3    | -0.57737868  | 0           |
| LINC01508 | INF2     | -0.458930066 | 0           |
| LINC01508 | TGFBR1   | -0.521867314 | 0           |
| LINC01508 | TGFBI    | -0.394046812 | 0           |
| LINC01508 | ERBB3    | -0.550286369 | 0           |
| LINC01508 | CCL18    | -0.390759736 | 0           |
| LINC01508 | CCL17    | -0.439795401 | 3.44E-22    |
| LINC01508 | C16orf45 | -0.392760207 | 0           |
| LINC01508 | PRDM1    | -0.321708031 | 6.56E-12    |
| LINC01508 | TRIM47   | -0.60131327  | 0           |
| LINC01508 | CNFN     | -0.377385204 | 1.54E-16    |
| LINC01508 | ARMCX3   | -0.336254989 | 6.22E-13    |
| LINC01508 | RAMP1    | -0.377678098 | 1.40E-16    |
| LINC01508 | GABRD    | -0.037390254 | 0.434386644 |
| LINC01508 | COL13A1  | -0.193625981 | 4.57E-05    |
| LINC01508 | S100A5   | -0.417200873 | 0           |
| LINC01508 | MISP     | -0.505462715 | 0           |
| LINC01508 | HES6     | -0.196367977 | 3.55E-05    |
| LINC01508 | PSD3     | -0.49892913  | 0           |
| LINC01508 | DOK7     | -0.525650962 | 0           |
| LINC01508 | ZMAT3    | -0.474561936 | 0           |
| LINC01508 | MFAP2    | -0.483615684 | 0           |
| LINC01508 | TMEM79   | -0.587794631 | 0           |
| LINC01508 | SLC1A5   | -0.515243095 | 0           |
| LINC01508 | BBC3     | -0.462311889 | 0           |
| LINC01508 | HLA-DQB2 | -0.449399603 | 0           |
| LINC01508 | C1QL1    | -0.464140736 | 0           |
| LINC01508 | TMEM215  | -0.186132717 | 8.74E-05    |
| LINC01508 | PNP      | -0.422281904 | 0           |
| LINC01508 | ARNTL    | -0.47485256  | 0           |
| LINC01508 | CLDN2    | -0.323749575 | 3.60E-12    |
| LINC01508 | MVP      | -0.638669341 | 0           |
| LINC01508 | LGALS1   | -0.524259965 | 0           |
| LINC01508 | BIRC7    | -0.529244922 | 4.67E-33    |
| LINC01508 | COL8A1   | -0.573574608 | 0           |
| LINC01508 | PERP     | -0.515554143 | 0           |
| LINC01508 | GJA4     | -0.208737167 | 1.08E-05    |

|           |           |              |             |
|-----------|-----------|--------------|-------------|
| LINC01508 | IGFL2     | -0.508935147 | 2.66E-30    |
| LINC01508 | DAPK2     | -0.3186869   | 1.05E-11    |
| LINC01508 | MAMLD1    | -0.532370921 | 0           |
| LINC01508 | ETV5      | -0.279312062 | 3.05E-09    |
| LINC01508 | RUNX1     | -0.644745218 | 0           |
| LINC01508 | LONRF2    | -0.280056565 | 2.77E-09    |
| LINC01508 | SPOCK1    | -0.211619581 | 8.13E-06    |
| LINC01508 | XKRX      | -0.418156429 | 0           |
| LINC01508 | TGFB1     | -0.396280463 | 0           |
| LINC01508 | ERP27     | -0.153159564 | 0.001301468 |
| LINC01508 | TNFRSF10C | -0.413612961 | 0           |
| LINC01508 | PALM      | -0.539303353 | 0           |
| LINC01508 | TSC22D1   | -0.379845085 | 6.24E-17    |
| LINC01508 | TGM2      | -0.546430669 | 0           |
| LINC01508 | UBE2QL1   | -0.234818746 | 7.01E-07    |
| LINC01508 | ECE1      | -0.561755887 | 0           |
| LINC01508 | COL8A2    | -0.529239299 | 0           |
| LINC01508 | HIST3H2A  | -0.377122238 | 1.68E-16    |
| LINC01508 | TNFRSF21  | -0.479081576 | 0           |
| LINC01508 | SOX4      | -0.547653872 | 0           |
| LINC01508 | ELF3      | -0.599878871 | 0           |
| LINC01508 | TPD52L1   | -0.42823566  | 0           |
| LINC01508 | INHBB     | -0.407448293 | 0           |
| LINC01508 | HPN       | -0.458502994 | 0           |
| LINC01508 | MMP7      | -0.434730536 | 1.15E-21    |
| LINC01508 | RAB27A    | -0.478632094 | 0           |
| LINC01508 | IGF2BP2   | -0.531247571 | 0           |
| LINC01508 | ITGB4     | -0.550671173 | 0           |
| LINC01508 | PPP1R1B   | -0.513061356 | 0           |
| LINC01508 | NPDC1     | -0.382612328 | 9.56E-18    |
| LINC01508 | CCL13     | -0.545732314 | 1.95E-35    |
| LINC01508 | SPINT1    | -0.629749771 | 0           |
| LINC01508 | HEY2      | -0.290095655 | 7.03E-10    |
| LINC01508 | CST2      | -0.475787776 | 3.51E-26    |
| LINC01508 | ADM       | -0.359599821 | 9.57E-15    |
| LINC01508 | VSTM2L    | -0.413887983 | 0           |
| LINC01508 | FAM84A    | -0.522417075 | 0           |
| LINC01508 | P4HA2     | -0.475812798 | 0           |
| LINC01508 | LPL       | -0.373839134 | 4.26E-16    |
| LINC01508 | TMEM173   | -0.511893753 | 0           |
| LINC01508 | DHRS3     | -0.438094759 | 0           |
| LINC01508 | SCN1B     | -0.620408945 | 0           |
| LINC01508 | GLT1D1    | -0.299838164 | 1.77E-10    |
| LINC01508 | PHYHIP    | -0.578826128 | 0           |
| LINC01508 | BHLHE40   | -0.549293226 | 0           |
| LINC01508 | BID       | -0.482139585 | 0           |
| LINC01508 | POSTN     | -0.388686219 | 0           |
| LINC01508 | ITGA3     | -0.628292678 | 0           |
| LINC01508 | RSP04     | -0.474734126 | 0           |
| LINC01508 | ADAMTS9   | -0.212982211 | 7.09E-06    |
| LINC01508 | ABTB2     | -0.606486496 | 0           |

|           |            |              |             |
|-----------|------------|--------------|-------------|
| LINC01508 | KCNQ3      | -0.631683437 | 0           |
| LINC01508 | ANXA1      | -0.360631686 | 7.82E-15    |
| LINC01508 | S100A11    | -0.565501238 | 0           |
| LINC01508 | CEACAM6    | -0.462325061 | 1.24E-24    |
| LINC01508 | IER5L      | -0.568338123 | 0           |
| LINC01508 | KRT80      | -0.538392617 | 0           |
| LINC01508 | CDH6       | -0.484509683 | 0           |
| LINC01508 | UNC5B      | -0.519658768 | 0           |
| LINC01508 | PLEKHN1    | -0.578080064 | 0           |
| LINC01508 | SYTL1      | -0.407740194 | 0           |
| LINC01508 | TMEM163    | -0.440374365 | 0           |
| LINC01508 | C4orf48    | -0.310475098 | 3.69E-11    |
| LINC01508 | B3GNT7     | -0.378071128 | 1.23E-16    |
| LINC01508 | BAIAP3     | -0.539484621 | 0           |
| LINC01508 | PHLDA2     | -0.46200552  | 0           |
| LINC01508 | GAP43      | -0.55197059  | 2.27E-36    |
| LINC01508 | S100A1     | -0.426563967 | 0           |
| LINC01508 | PTPRE      | -0.611443136 | 0           |
| LINC01508 | CCND1      | -0.446323582 | 0           |
| LINC01508 | ST6GALNAC5 | -0.563272809 | 4.08E-38    |
| LINC01508 | KRT17      | -0.30434589  | 9.17E-11    |
| LINC01508 | HPCAL4     | -0.388787491 | 0           |
| LINC01508 | GABBR2     | -0.248589572 | 1.45E-07    |
| LINC01508 | DIRAS3     | -0.384576063 | 0           |
| LINC01508 | SERINC2    | -0.420930338 | 0           |
| LINC01508 | PTCHD4     | -0.343326421 | 1.87E-13    |
| LINC01508 | EPS8       | -0.408460301 | 0           |
| LINC01508 | LY6E       | -0.561463844 | 0           |
| LINC01508 | UPP1       | -0.615726192 | 0           |
| LINC01508 | AHNAK2     | -0.60551477  | 0           |
| LINC01508 | PLXNC1     | -0.488848481 | 0           |
| LINC01508 | TNC        | -0.560469992 | 0           |
| LINC01508 | DUSP4      | -0.54410227  | 0           |
| LINC01508 | NRCAM      | -0.46835798  | 0           |
| LINC01508 | NRP2       | -0.462846614 | 0           |
| LINC01508 | CTSC       | -0.476104415 | 0           |
| LINC01508 | AMIGO2     | -0.416708981 | 0           |
| LINC01508 | NAB2       | -0.428214809 | 0           |
| LINC01508 | TBC1D2     | -0.572908966 | 0           |
| LINC01508 | PHLDA3     | -0.482839551 | 0           |
| LINC01508 | PTP4A3     | -0.453539262 | 0           |
| LINC01508 | CRABP2     | -0.344933294 | 1.41E-13    |
| LINC01508 | GOS2       | -0.455277192 | 0           |
| LINC01508 | S100A6     | -0.56928829  | 0           |
| LINC01508 | FOXQ1      | -0.460697782 | 0           |
| LINC01508 | LRG1       | -0.482251069 | 0           |
| LINC01508 | LAMP5      | -0.460797777 | 0           |
| LINC01508 | ALDH3B1    | -0.577404352 | 0           |
| LINC01508 | CDH2       | -0.135733738 | 0.004413112 |
| LINC01508 | SCG5       | -0.311285555 | 3.26E-11    |
| LINC01508 | ZCCHC16    | -0.262430622 | 2.39E-08    |

|           |         |              |             |
|-----------|---------|--------------|-------------|
| LINC01508 | GRB7    | -0.597272188 | 0           |
| LINC01508 | TIAM1   | -0.403674858 | 0           |
| LINC01508 | FXVD5   | -0.441158724 | 0           |
| LINC01508 | CLDN9   | -0.466393536 | 0           |
| LINC01508 | FAM43A  | -0.523075057 | 0           |
| LINC01508 | CHST2   | -0.444144963 | 0           |
| LINC01508 | HMGA2   | -0.552228403 | 0           |
| LINC01508 | GALNT7  | -0.522798759 | 0           |
| LINC01508 | CBLN1   | -0.303859814 | 9.84E-11    |
| LINC01508 | STRA6   | -0.550760956 | 0           |
| LINC01508 | MUC21   | -0.486591115 | 1.78E-27    |
| LINC01508 | PRR36   | -0.575050281 | 0           |
| LINC01508 | NFE2L3  | -0.530278256 | 0           |
| LINC01508 | NR1D1   | -0.389844745 | 0           |
| LINC01508 | MUC1    | -0.581723435 | 0           |
| LINC01508 | NAT8L   | -0.27781341  | 3.73E-09    |
| LINC01508 | APOC1   | -0.30563831  | 7.58E-11    |
| LINC01508 | EVA1A   | -0.600051487 | 0           |
| LINC01508 | ENTPD1  | -0.253837262 | 7.75E-08    |
| LINC01508 | COL1A1  | -0.500385513 | 0           |
| LINC01508 | FNDC4   | -0.399861709 | 0           |
| LINC01508 | FRMD3   | -0.124806747 | 0.008886615 |
| LINC01508 | SHROOM4 | -0.530136561 | 0           |
| LINC01508 | NELL2   | -0.357531552 | 1.43E-14    |
| LINC01508 | EPHB3   | -0.679635876 | 0           |
| LINC01508 | TMC6    | -0.646949083 | 0           |
| LINC01508 | NOD1    | -0.501920191 | 0           |
| LINC01508 | GGCT    | -0.51885285  | 0           |
| LINC01508 | ICAM1   | -0.578276792 | 0           |
| LINC01508 | PRSS23  | -0.434587694 | 0           |
| LINC01508 | CFI     | -0.53485066  | 0           |
| LINC01508 | CD55    | -0.543374504 | 0           |
| LINC01508 | RASD2   | -0.466817912 | 0           |
| LINC01508 | KLK11   | -0.372452583 | 6.81E-16    |
| LINC01508 | ICAM5   | -0.46038418  | 0           |
| LINC01508 | ADORA1  | -0.496280747 | 0           |
| LINC01508 | ITGA2   | -0.548718927 | 0           |
| LINC01508 | ABCC3   | -0.418036719 | 0           |
| LINC01508 | MFGE8   | -0.531729108 | 0           |
| LINC01508 | STK32A  | -0.283116133 | 1.83E-09    |
| LINC01508 | CYSLTR2 | -0.32504248  | 3.87E-12    |
| LINC01508 | LAD1    | -0.576790056 | 0           |
| LINC01508 | MGAT3   | -0.530865036 | 0           |
| LINC01508 | IGFBP6  | -0.452308825 | 0           |
| LINC01508 | CYP2S1  | -0.581719747 | 0           |
| LINC01508 | KCNJ2   | -0.454013565 | 0           |
| LINC01508 | FAM20A  | -0.535312481 | 0           |
| LINC01508 | TGFA    | -0.421976671 | 0           |
| LINC01508 | MXRA8   | -0.530326623 | 0           |
| LINC01508 | C8orf4  | -0.426974444 | 0           |
| LINC01508 | CLDN10  | -0.547633826 | 1.02E-35    |

|           |           |              |             |
|-----------|-----------|--------------|-------------|
| LINC01508 | PDE5A     | -0.513184754 | 0           |
| LINC01508 | APOE      | -0.296542578 | 2.84E-10    |
| LINC01508 | SPOCK2    | -0.554215116 | 0           |
| LINC01508 | TENM1     | -0.240440745 | 3.72E-07    |
| LINC01508 | SLIT1     | -0.289520931 | 7.61E-10    |
| LINC01508 | CXCL14    | -0.321444781 | 6.84E-12    |
| LINC01508 | ECM1      | -0.19899863  | 2.77E-05    |
| LINC01508 | DUSP5     | -0.550865774 | 0           |
| LINC01508 | SEZ6L2    | -0.522786844 | 0           |
| LINC01508 | THRSP     | -0.122318073 | 0.010350018 |
| LINC01508 | C19orf33  | -0.518521944 | 0           |
| LINC01508 | MPZL2     | -0.483735252 | 0           |
| LINC01508 | CTSH      | -0.559426212 | 0           |
| LINC01508 | CYP1B1    | -0.566528139 | 0           |
| LINC01508 | ALOX5     | -0.548071157 | 0           |
| LINC01508 | SYTL5     | -0.468863291 | 2.24E-25    |
| LINC01508 | TNFRSF12A | -0.45868639  | 0           |
| LINC01508 | DUSP6     | -0.376796864 | 1.86E-16    |
| LINC01508 | ALOX15B   | -0.456966473 | 0           |
| LINC01508 | SDC4      | -0.513600763 | 0           |
| LINC01508 | MDK       | -0.479705234 | 0           |
| LINC01508 | KRT19     | -0.609845766 | 0           |
| LINC01508 | MET       | -0.559447488 | 0           |
| LINC01508 | TESC      | -0.275194246 | 5.27E-09    |
| LINC01508 | CXCL17    | -0.526845533 | 1.01E-32    |
| LINC01508 | NPC2      | -0.384105164 | 0           |
| LINC01508 | COMP      | -0.504276815 | 0           |
| LINC01508 | TUSC3     | -0.473586806 | 0           |
| LINC01508 | TMPRSS4   | -0.586158965 | 0           |
| LINC01508 | LGALS3    | -0.522096807 | 0           |
| LINC01508 | CRLF1     | -0.460153411 | 0           |
| LINC01508 | CTXN1     | -0.522196944 | 0           |
| LINC01508 | PCSK1N    | -0.367799851 | 1.78E-15    |
| LINC01508 | NMU       | -0.453411105 | 1.21E-23    |
| LINC01508 | GALE      | -0.551601341 | 0           |
| LINC01508 | PCSK2     | -0.162694707 | 0.000631176 |
| LINC01508 | GJB3      | -0.542376254 | 0           |
| LINC01508 | SLPI      | -0.487318058 | 0           |
| LINC01508 | AGR2      | -0.197536715 | 3.18E-05    |
| LINC01508 | MRC2      | -0.554099377 | 0           |
| LINC01508 | GOLT1A    | -0.469799613 | 0           |
| LINC01508 | SLC27A6   | -0.478768913 | 1.56E-26    |
| LINC01508 | KCNN4     | -0.651527586 | 0           |
| LINC01508 | ETV4      | -0.412799114 | 1.71E-19    |
| LINC01508 | SYT12     | -0.592559508 | 0           |
| LINC01508 | PVRL4     | -0.600373315 | 0           |
| LINC01508 | PLCD3     | -0.554809697 | 0           |
| LINC01508 | PLAU      | -0.54155601  | 0           |
| LINC01508 | LRRK2     | -0.28111396  | 2.40E-09    |
| LINC01508 | SFN       | -0.548061512 | 0           |
| LINC01508 | LPAR5     | -0.540790373 | 0           |

|           |          |              |             |
|-----------|----------|--------------|-------------|
| LINC01508 | NGEF     | -0.582478292 | 0           |
| LINC01508 | DTX4     | -0.425535932 | 0           |
| LINC01508 | CST6     | -0.519635223 | 0           |
| LINC01508 | QPCT     | -0.531444441 | 0           |
| LINC01508 | TIMP1    | -0.562083247 | 0           |
| LINC01508 | CAMK2N1  | -0.624909153 | 0           |
| LINC01508 | KLHDC8A  | -0.270884667 | 9.23E-09    |
| LINC01508 | PDLIM4   | -0.637195937 | 0           |
| LINC01508 | SCEL     | -0.424503215 | 0           |
| LINC01508 | LCN2     | -0.549858021 | 0           |
| LINC01508 | PROS1    | -0.629257171 | 0           |
| LINC01508 | GABRB2   | -0.501689706 | 0           |
| LINC01508 | TMPRSS6  | -0.618688886 | 0           |
| LINC01508 | KLK7     | -0.453418041 | 1.21E-23    |
| LINC01508 | PDZK1IP1 | -0.523393056 | 0           |
| LINC01508 | CDH3     | -0.542058114 | 0           |
| LINC01508 | LRP4     | -0.35833435  | 1.22E-14    |
| LINC01508 | IGSF1    | -0.237971928 | 4.93E-07    |
| LINC01508 | B3GNT3   | -0.600964776 | 0           |
| LINC01508 | CLDN1    | -0.578307004 | 0           |
| LINC01508 | GDF15    | -0.517953177 | 0           |
| LINC01508 | ARHGAP36 | -0.181139553 | 0.000135584 |
| LINC01508 | LAMB3    | -0.614584545 | 0           |
| LINC01508 | KLK10    | -0.49382895  | 0           |
| LINC01508 | DPP4     | -0.432239864 | 0           |
| LINC01508 | METTL7B  | -0.431718328 | 0           |
| LINC01508 | LIPH     | -0.510520486 | 0           |
| LINC01508 | CLDN16   | -0.519972086 | 0           |
| LINC01508 | CHI3L1   | -0.50786189  | 0           |
| LINC01508 | SLC22A31 | -0.51343847  | 6.76E-31    |
| LINC01508 | TACSTD2  | -0.537802149 | 0           |
| LINC01508 | SFTPB    | -0.504233129 | 0           |
| LINC01508 | RXRG     | -0.37693246  | 1.78E-16    |
| LINC01508 | DCSTAMP  | -0.557347217 | 3.42E-37    |
| LINC01508 | CITED1   | -0.3631883   | 4.69E-15    |
| LINC01508 | SERPINA1 | -0.660730263 | 0           |
| LINC01508 | PRR15    | -0.391462114 | 0           |
| LINC01508 | SLC34A2  | -0.589593835 | 0           |
| LINC01508 | FN1      | -0.700484232 | 0           |
| LINC01508 | ZCCHC12  | -0.290723001 | 6.44E-10    |
| LINC01135 | TFF3     | 0.565082535  | 0           |
| LINC01135 | CCL21    | 0.278059667  | 3.09E-09    |
| LINC01135 | TPO      | 0.609447204  | 0           |
| LINC01135 | MT1G     | 0.578127012  | 0           |
| LINC01135 | DIO1     | 0.590569958  | 0           |
| LINC01135 | DPT      | 0.232428377  | 8.50E-07    |
| LINC01135 | CDH16    | 0.589845312  | 0           |
| LINC01135 | CRABP1   | 0.606625075  | 1.80E-45    |
| LINC01135 | SLC26A7  | 0.767310371  | 0           |
| LINC01135 | MT1H     | 0.546876682  | 1.32E-35    |
| LINC01135 | SLC26A4  | 0.701767716  | 0           |

|           |           |             |             |
|-----------|-----------|-------------|-------------|
| LINC01135 | SLC5A8    | 0.671798255 | 6.24E-59    |
| LINC01135 | PKHD1L1   | 0.615826831 | 3.50E-47    |
| LINC01135 | TFCP2L1   | 0.63008167  | 0           |
| LINC01135 | WSCD2     | 0.651278756 | 2.46E-54    |
| LINC01135 | IPCEF1    | 0.583587316 | 0           |
| LINC01135 | SLC5A5    | 0.40424648  | 1.09E-18    |
| LINC01135 | MT1F      | 0.539887296 | 0           |
| LINC01135 | FOSB      | 0.376094486 | 2.29E-16    |
| LINC01135 | SEMA3D    | 0.591336467 | 9.47E-43    |
| LINC01135 | BMP8A     | 0.549996029 | 0           |
| LINC01135 | MATN2     | 0.742442776 | 0           |
| LINC01135 | PLA2R1    | 0.61191673  | 0           |
| LINC01135 | COL23A1   | 0.592659077 | 0           |
| LINC01135 | HGD       | 0.62398551  | 0           |
| LINC01135 | TCEAL2    | 0.444567496 | 0           |
| LINC01135 | CHRD1     | 0.296486705 | 2.34E-10    |
| LINC01135 | TNFRSF11B | 0.540148418 | 0           |
| LINC01135 | FAM167A   | 0.647277436 | 0           |
| LINC01135 | KIT       | 0.666078657 | 0           |
| LINC01135 | SLC4A4    | 0.739168182 | 0           |
| LINC01135 | SMOC2     | 0.38849786  | 0           |
| LINC01135 | FHL1      | 0.653328634 | 0           |
| LINC01135 | OTOS      | 0.465248484 | 0           |
| LINC01135 | IGFBPL1   | 0.688017697 | 7.80E-63    |
| LINC01135 | HBB       | 0.359111901 | 1.05E-14    |
| LINC01135 | BEX1      | 0.41113691  | 0           |
| LINC01135 | FABP4     | 0.515951644 | 3.12E-31    |
| LINC01135 | LMOD1     | 0.624411447 | 0           |
| LINC01135 | SOD3      | 0.416677352 | 0           |
| LINC01135 | TMEM171   | 0.552197766 | 0           |
| LINC01135 | PI16      | 0.302902555 | 1.13E-10    |
| LINC01135 | ZMAT4     | 0.550073635 | 4.39E-36    |
| LINC01135 | MFAP4     | 0.182283975 | 0.000125852 |
| LINC01135 | CWH43     | 0.570316204 | 3.09E-39    |
| LINC01135 | SPX       | 0.711824962 | 0           |
| LINC01135 | APOD      | 0.116189432 | 0.014901523 |
| LINC01135 | DPP6      | 0.549502577 | 0           |
| LINC01135 | MMRN1     | 0.471705336 | 0           |
| LINC01135 | WDR72     | 0.722984849 | 0           |
| LINC01135 | MPPED2    | 0.66611823  | 0           |
| LINC01135 | PAPSS2    | 0.478323315 | 0           |
| LINC01135 | DCN       | 0.100356579 | 0.035588214 |
| LINC01135 | SORBS2    | 0.702827523 | 0           |
| LINC01135 | EGR2      | 0.449234789 | 0           |
| LINC01135 | EDN3      | 0.522621597 | 3.88E-32    |
| LINC01135 | DIO2      | 0.65264356  | 0           |
| LINC01135 | ITPR1     | 0.669322189 | 0           |
| LINC01135 | CFD       | 0.132022144 | 0.005629178 |
| LINC01135 | CPXM1     | 0.277136422 | 4.08E-09    |
| LINC01135 | ELMO1     | 0.552324427 | 0           |
| LINC01135 | GPC3      | 0.404834746 | 9.63E-19    |

|           |            |             |            |
|-----------|------------|-------------|------------|
| LINC01135 | MYOC       | 0.332147025 | 9.12E-13   |
| LINC01135 | DEPTOR     | 0.61690883  | 0          |
| LINC01135 | DGKI       | 0.610132986 | 0          |
| LINC01135 | CARTPT     | 0.543580104 | 4.06E-35   |
| LINC01135 | IYD        | 0.69161317  | 0          |
| LINC01135 | LYVE1      | 0.37204305  | 6.70E-16   |
| LINC01135 | CLCNKB     | 0.608639867 | 0          |
| LINC01135 | NCAM1      | 0.454022217 | 0          |
| LINC01135 | HBA2       | 0.242874812 | 2.82E-07   |
| LINC01135 | GLT8D2     | 0.468054307 | 0          |
| LINC01135 | OGDHL      | 0.577102948 | 0          |
| LINC01135 | LIFR       | 0.674761643 | 0          |
| LINC01135 | CSGALNACT1 | 0.615384223 | 0          |
| LINC01135 | RAP1GAP    | 0.631603157 | 0          |
| LINC01135 | COL9A3     | 0.496584278 | 0          |
| LINC01135 | FBLN1      | 0.069945988 | 0.14338146 |
| LINC01135 | EFEMP1     | 0.435618424 | 0          |
| LINC01135 | AOX1       | 0.457973107 | 3.80E-24   |
| LINC01135 | GRIN2C     | 0.578208143 | 0          |
| LINC01135 | C11orf74   | 0.527251735 | 0          |
| LINC01135 | PPARGC1A   | 0.630072167 | 0          |
| LINC01135 | ANGPTL1    | 0.611592774 | 0          |
| LINC01135 | SCARA5     | 0.246560063 | 1.67E-07   |
| LINC01135 | LTF        | 0.423203562 | 0          |
| LINC01135 | CA4        | 0.585775575 | 8.52E-42   |
| LINC01135 | TG         | 0.702773341 | 0          |
| LINC01135 | FCGBP      | 0.556175021 | 0          |
| LINC01135 | PBX4       | 0.51266946  | 0          |
| LINC01135 | CYR61      | 0.399417191 | 0          |
| LINC01135 | FOS        | 0.405095641 | 0          |
| LINC01135 | KHDRBS2    | 0.580190317 | 0          |
| LINC01135 | MUM1L1     | 0.425092265 | 0          |
| LINC01135 | RGS16      | 0.597938255 | 0          |
| LINC01135 | MT1M       | 0.434982568 | 0          |
| LINC01135 | LRP2       | 0.720909063 | 0          |
| LINC01135 | MAFB       | 0.495783749 | 0          |
| LINC01135 | KCNK2      | 0.549482153 | 0          |
| LINC01135 | TBC1D4     | 0.623685099 | 0          |
| LINC01135 | MIOX       | 0.545928939 | 1.83E-35   |
| LINC01135 | TPPP       | 0.663954504 | 0          |
| LINC01135 | FMOD       | 0.554868418 | 0          |
| LINC01135 | CITED2     | 0.540997739 | 0          |
| LINC01135 | RGS8       | 0.602927967 | 8.44E-45   |
| LINC01135 | ABI3BP     | 0.500861661 | 0          |
| LINC01135 | ADH1B      | 0.282949469 | 1.59E-09   |
| LINC01135 | OGN        | 0.19458646  | 4.05E-05   |
| LINC01135 | NR4A1      | 0.348850552 | 7.07E-14   |
| LINC01135 | FOXJ1      | 0.532801207 | 1.47E-33   |
| LINC01135 | ALDH1A1    | 0.594980242 | 0          |
| LINC01135 | OCA2       | 0.490243846 | 6.36E-28   |
| LINC01135 | TMEM139    | 0.381580888 | 2.47E-17   |



|           |          |             |             |
|-----------|----------|-------------|-------------|
| LINC01135 | ARHGAP24 | 0.596557755 | 0           |
| LINC01135 | SLC25A15 | 0.701361778 | 0           |
| LINC01135 | DES      | 0.192797375 | 4.78E-05    |
| LINC01135 | GDF10    | 0.411530355 | 2.26E-19    |
| LINC01135 | KIAA1324 | 0.514835029 | 0           |
| LINC01135 | JUN      | 0.454108313 | 0           |
| LINC01135 | C7       | 0.0655384   | 0.170391008 |
| LINC01135 | LGI3     | 0.60094889  | 0           |
| LINC01135 | CDON     | 0.683785321 | 0           |
| LINC01135 | BCL2     | 0.705330665 | 0           |
| LINC01135 | HLF      | 0.637254941 | 0           |
| LINC01135 | EGR1     | 0.478057796 | 0           |
| LINC01135 | IP6K3    | 0.586042375 | 0           |
| LINC01135 | SCUBE3   | 0.562553012 | 0           |
| LINC01135 | PKNOX2   | 0.525453666 | 0           |
| LINC01135 | SMAD9    | 0.630307758 | 0           |
| LINC01135 | IQGAP2   | 0.682500986 | 0           |
| LINC01135 | GNA14    | 0.647967899 | 0           |
| LINC01135 | LAYN     | 0.469258646 | 0           |
| LINC01135 | AVPR1A   | 0.618174584 | 0           |
| LINC01135 | PDLIM3   | 0.356065239 | 1.88E-14    |
| LINC01135 | GPM6A    | 0.697428067 | 0           |
| LINC01135 | SDPR     | 0.635931317 | 0           |
| LINC01135 | CRYAB    | 0.337097076 | 5.40E-13    |
| LINC01135 | FOXA2    | 0.409954802 | 3.19E-19    |
| LINC01135 | C8orf88  | 0.610667287 | 0           |
| LINC01135 | ISM1     | 0.453679681 | 0           |
| LINC01135 | BMP2     | 0.37958141  | 6.98E-17    |
| LINC01135 | ID4      | 0.595537804 | 0           |
| LINC01135 | NUPR1    | 0.315139554 | 1.82E-11    |
| LINC01135 | SERTM1   | 0.482696972 | 5.28E-27    |
| LINC01135 | IRS1     | 0.67662751  | 0           |
| LINC01135 | FIBIN    | 0.23037428  | 1.14E-06    |
| LINC01135 | PODN     | 0.132879549 | 0.005324166 |
| LINC01135 | TDRD9    | 0.466291271 | 0           |
| LINC01135 | EPHA3    | 0.390179623 | 0           |
| LINC01135 | AIF1L    | 0.535280426 | 0           |
| LINC01135 | EBF4     | 0.478490683 | 0           |
| LINC01135 | ADM2     | 0.460992378 | 0           |
| LINC01135 | GSTM3    | 0.579793031 | 0           |
| LINC01135 | HSD17B6  | 0.543016649 | 0           |
| LINC01135 | AGR3     | 0.400095905 | 2.63E-18    |
| LINC01135 | EPHB1    | 0.549589098 | 0           |
| LINC01135 | TMOD1    | 0.375995626 | 2.36E-16    |
| LINC01135 | WASF3    | 0.772477639 | 0           |
| LINC01135 | SELV     | 0.541360776 | 8.59E-35    |
| LINC01135 | ENPP1    | 0.5713767   | 0           |
| LINC01135 | SYNE1    | 0.673168694 | 2.99E-59    |
| LINC01135 | PLCH1    | 0.542134706 | 0           |
| LINC01135 | CCDC146  | 0.654925294 | 0           |
| LINC01135 | SLC16A2  | 0.60528471  | 0           |

|           |          |              |             |
|-----------|----------|--------------|-------------|
| LINC01135 | IER2     | 0.390410533  | 0           |
| LINC01135 | KCNAB1   | 0.518316847  | 0           |
| LINC01135 | SYNDIG1  | 0.420700562  | 0           |
| LINC01135 | C16orf89 | 0.60282497   | 0           |
| LINC01135 | CTGF     | 0.320941543  | 7.40E-12    |
| LINC01135 | NR4A3    | 0.215089627  | 5.73E-06    |
| LINC01135 | KIAA1456 | 0.68759847   | 0           |
| LINC01135 | AQP4     | 0.604197812  | 0           |
| LINC01135 | RNF150   | 0.581753646  | 0           |
| LINC01135 | C1S      | -0.010798628 | 0.82142864  |
| LINC01135 | PFKFB2   | 0.702320881  | 0           |
| LINC01135 | PROX1    | 0.668336421  | 0           |
| LINC01135 | TCF7L1   | 0.539272858  | 0           |
| LINC01135 | HSPB6    | 0.240757893  | 3.59E-07    |
| LINC01135 | FHDC1    | 0.650314169  | 0           |
| LINC01135 | PRR15L   | 0.557774802  | 0           |
| LINC01135 | SLC1A1   | 0.523103708  | 0           |
| LINC01135 | BTBD11   | 0.635443113  | 0           |
| LINC01135 | TRIM58   | 0.700650891  | 0           |
| LINC01135 | LRIG1    | 0.609397277  | 0           |
| LINC01135 | ROR2     | 0.308267261  | 5.13E-11    |
| LINC01135 | GPR125   | 0.671574988  | 0           |
| LINC01135 | FLRT1    | 0.578626846  | 0           |
| LINC01135 | PGF      | 0.451570137  | 0           |
| LINC01135 | DUSP1    | 0.386602348  | 0           |
| LINC01135 | PLA2G7   | 0.370831761  | 8.95E-16    |
| LINC01135 | PLSCR4   | 0.677932979  | 0           |
| LINC01135 | FAM46B   | 0.387301463  | 0           |
| LINC01135 | GLDC     | 0.421965891  | 0           |
| LINC01135 | ZBTB16   | 0.561740143  | 0           |
| LINC01135 | OMD      | 0.124010348  | 0.00929676  |
| LINC01135 | HSD11B2  | 0.511571641  | 0           |
| LINC01135 | FGL2     | 0.167995444  | 0.00041491  |
| LINC01135 | CLCNKA   | 0.558720521  | 2.10E-37    |
| LINC01135 | GATM     | 0.66126357   | 0           |
| LINC01135 | TNS3     | 0.589613976  | 0           |
| LINC01135 | TOB1     | 0.442555111  | 0           |
| LINC01135 | MARC2    | 0.697776561  | 0           |
| LINC01135 | LRRC2    | 0.737606839  | 0           |
| LINC01135 | SORD     | 0.538019159  | 0           |
| LINC01135 | RIMS4    | 0.546230962  | 0           |
| LINC01135 | SLC29A4  | 0.468174301  | 0           |
| LINC01135 | SLC39A14 | 0.690300893  | 0           |
| LINC01135 | FAXDC2   | 0.720891049  | 0           |
| LINC01135 | HSPB8    | 0.312708749  | 2.63E-11    |
| LINC01135 | CCL19    | -0.111793872 | 0.019128748 |
| LINC01135 | KCNIP3   | 0.54826902   | 0           |
| LINC01135 | CGNL1    | 0.666791814  | 0           |
| LINC01135 | ATF3     | 0.161347254  | 0.000700825 |
| LINC01135 | SGCD     | 0.396158767  | 0           |
| LINC01135 | STARD13  | 0.691637283  | 0           |

|           |          |              |             |
|-----------|----------|--------------|-------------|
| LINC01135 | LDHD     | 0.641674302  | 0           |
| LINC01135 | RCAN1    | 0.39650258   | 0           |
| LINC01135 | ID3      | 0.356038432  | 1.89E-14    |
| LINC01135 | SYTL3    | 0.661114925  | 0           |
| LINC01135 | MT1E     | 0.351172568  | 4.66E-14    |
| LINC01135 | CAMK1D   | 0.559894275  | 0           |
| LINC01135 | PRKCQ    | 0.694209925  | 0           |
| LINC01135 | NUAK2    | 0.404015693  | 0           |
| LINC01135 | LIPG     | 0.680898226  | 0           |
| LINC01135 | SLC25A25 | 0.47838317   | 0           |
| LINC01135 | PRKX     | 0.378839744  | 9.34E-17    |
| LINC01135 | SRPX     | 0.124866886  | 0.008853657 |
| LINC01135 | FAM189A1 | 0.534433375  | 0           |
| LINC01135 | PLEKHH1  | 0.725640182  | 0           |
| LINC01135 | WNT11    | 0.359303381  | 1.01E-14    |
| LINC01135 | SNAI1    | 0.334623295  | 8.16E-13    |
| LINC01135 | FDCSP    | -0.025377209 | 0.595917109 |
| LINC01135 | MT1X     | 0.327808588  | 2.49E-12    |
| LINC01135 | ACACB    | 0.732811609  | 0           |
| LINC01135 | ARC      | 0.232459995  | 9.10E-07    |
| LINC01135 | KLK4     | 0.296336957  | 2.39E-10    |
| LINC01135 | ZFPM2    | 0.38220795   | 1.50E-17    |
| LINC01135 | AKAP12   | 0.511995875  | 0           |
| LINC01135 | GJB6     | 0.449360946  | 3.32E-23    |
| LINC01135 | ERO1LB   | 0.691708343  | 0           |
| LINC01135 | DNALI1   | 0.494983221  | 0           |
| LINC01135 | HKDC1    | 0.383585756  | 0           |
| LINC01135 | ZFP36L2  | 0.560666578  | 0           |
| LINC01135 | CAPSL    | 0.475804807  | 3.49E-26    |
| LINC01135 | CYP7B1   | 0.623673752  | 0           |
| LINC01135 | CPQ      | 0.630171736  | 0           |
| LINC01135 | RPS6KA6  | 0.681191924  | 3.68E-61    |
| LINC01135 | TLE1     | 0.45645827   | 0           |
| LINC01135 | TP53INP2 | 0.600650323  | 0           |
| LINC01135 | KATNAL2  | 0.64096001   | 0           |
| LINC01135 | SGPP2    | 0.327250033  | 2.72E-12    |
| LINC01135 | CTH      | 0.677420947  | 0           |
| LINC01135 | KIF12    | 0.434246859  | 0           |
| LINC01135 | TMEM220  | 0.690437199  | 0           |
| LINC01135 | CENPJ    | 0.558108687  | 0           |
| LINC01135 | FAM155B  | 0.425999172  | 0           |
| LINC01135 | WFS1     | 0.517950907  | 0           |
| LINC01135 | SELENBP1 | 0.585621261  | 0           |
| LINC01135 | SNTA1    | 0.499165714  | 0           |
| LINC01135 | FRAS1    | 0.412681658  | 0           |
| LINC01135 | FBLN7    | 0.573395893  | 0           |
| LINC01135 | AGPAT9   | 0.695428589  | 0           |
| LINC01135 | GPR83    | 0.540831932  | 0           |
| LINC01135 | PRTG     | 0.728885132  | 0           |
| LINC01135 | EGR3     | 0.218502654  | 4.04E-06    |
| LINC01135 | GRAMD2   | 0.50562441   | 0           |

|           |          |              |             |
|-----------|----------|--------------|-------------|
| LINC01135 | HYOU1    | 0.576951892  | 0           |
| LINC01135 | FBLN5    | 0.273925371  | 6.22E-09    |
| LINC01135 | ITM2A    | 0.562344227  | 0           |
| LINC01135 | SRF      | 0.380169609  | 5.40E-17    |
| LINC01135 | FGFR2    | 0.631691663  | 0           |
| LINC01135 | MT1A     | 0.18840624   | 7.13E-05    |
| LINC01135 | MAMDC2   | 0.435138447  | 0           |
| LINC01135 | FHL2     | 0.182396026  | 0.000124635 |
| LINC01135 | FTCDNL1  | 0.598152855  | 0           |
| LINC01135 | PKIA     | 0.486968288  | 0           |
| LINC01135 | DNAJB4   | 0.66224948   | 0           |
| LINC01135 | SLC25A33 | 0.444387079  | 0           |
| LINC01135 | EYA2     | 0.33080972   | 1.53E-12    |
| LINC01135 | LPAR1    | 0.22793071   | 1.49E-06    |
| LINC01135 | STX11    | 0.45654933   | 0           |
| LINC01135 | ARHGEF28 | 0.571940928  | 0           |
| LINC01135 | OR2W3    | 0.597792872  | 0           |
| LINC01135 | ALDH1B1  | 0.459099861  | 2.85E-24    |
| LINC01135 | CXCL12   | 0.168441522  | 0.000400291 |
| LINC01135 | OLFM2    | 0.359494578  | 9.77E-15    |
| LINC01135 | TUB      | 0.6861045    | 0           |
| LINC01135 | HTRA3    | 0.185821535  | 9.24E-05    |
| LINC01135 | CKB      | 0.309322245  | 4.38E-11    |
| LINC01135 | RGS2     | 0.02604456   | 0.586144731 |
| LINC01135 | SHANK2   | 0.721793984  | 0           |
| LINC01135 | CNTFR    | 0.500668858  | 3.13E-29    |
| LINC01135 | CYTH3    | 0.649760579  | 0           |
| LINC01135 | PLAC9    | 0.179915011  | 0.000154347 |
| LINC01135 | WWOX     | 0.641594732  | 0           |
| LINC01135 | NPR3     | 0.503753152  | 0           |
| LINC01135 | SDC2     | 0.580154149  | 0           |
| LINC01135 | KLF15    | 0.601405464  | 0           |
| LINC01135 | TMEM164  | 0.616156526  | 0           |
| LINC01135 | LONRF3   | 0.567408664  | 0           |
| LINC01135 | GBP1     | 0.191980387  | 5.32E-05    |
| LINC01135 | ARHGAP6  | 0.618407481  | 0           |
| LINC01135 | TMEM119  | 0.039280942  | 0.41149932  |
| LINC01135 | SH3RF1   | 0.716247018  | 0           |
| LINC01135 | CRELD2   | 0.337244019  | 5.27E-13    |
| LINC01135 | PCP4     | 0.023445961  | 0.624064205 |
| LINC01135 | GCSH     | 0.641437576  | 0           |
| LINC01135 | IMPA2    | 0.56119251   | 0           |
| LINC01135 | C1R      | -0.101320787 | 0.033848472 |
| LINC01135 | SUCNR1   | 0.396697181  | 0           |
| LINC01135 | SFRP1    | 0.41601327   | 0           |
| LINC01135 | UGT8     | 0.551743746  | 0           |
| LINC01135 | TLE4     | 0.270704108  | 9.45E-09    |
| LINC01135 | ANTXR1   | 0.410096251  | 0           |
| LINC01135 | GPX3     | 0.445308595  | 0           |
| LINC01135 | DPY19L2  | 0.614000318  | 0           |
| LINC01135 | FAM46C   | 0.464260163  | 0           |

|           |          |              |             |
|-----------|----------|--------------|-------------|
| LINC01135 | IL33     | 0.285541913  | 1.11E-09    |
| LINC01135 | PEG3     | 0.697285095  | 0           |
| LINC01135 | FAHD2A   | 0.545894666  | 0           |
| LINC01135 | PTGDS    | -0.010532258 | 0.825762086 |
| LINC01135 | CHCHD10  | 0.247516148  | 1.64E-07    |
| LINC01135 | CD36     | 0.559938953  | 0           |
| LINC01135 | ANKRD37  | 0.376201431  | 2.22E-16    |
| LINC01135 | TSPAN33  | 0.372121628  | 6.57E-16    |
| LINC01135 | PRDM16   | 0.61717208   | 0           |
| LINC01135 | UST      | 0.682592613  | 0           |
| LINC01135 | NEXN     | 0.54498393   | 0           |
| LINC01135 | NUPR1L   | 0.175561595  | 0.000218431 |
| LINC01135 | SLC24A3  | 0.507020512  | 0           |
| LINC01135 | MARC1    | 0.589797513  | 0           |
| LINC01135 | MYH11    | 0.304325323  | 9.19E-11    |
| LINC01135 | APOA1    | 0.398375057  | 3.78E-18    |
| LINC01135 | TMEM178B | 0.478140912  | 0           |
| LINC01135 | CAPN6    | 0.216853667  | 4.53E-06    |
| LINC01135 | PPM1L    | 0.654638783  | 0           |
| LINC01135 | FZD8     | 0.537994338  | 0           |
| LINC01135 | RCAN2    | 0.562805482  | 0           |
| LINC01135 | COPZ2    | 0.400887617  | 0           |
| LINC01135 | GAS1     | 0.218678106  | 3.96E-06    |
| LINC01135 | DACT1    | 0.439519796  | 0           |
| LINC01135 | WBSCR17  | 0.543074802  | 0           |
| LINC01135 | NCS1     | 0.422054397  | 0           |
| LINC01135 | SPIRE2   | 0.440543435  | 0           |
| LINC01135 | C15orf52 | 0.445804599  | 0           |
| LINC01135 | SPAG5    | 0.414127404  | 0           |
| LINC01135 | ARL4D    | 0.348098815  | 8.09E-14    |
| LINC01135 | FAM189A2 | 0.546737179  | 0           |
| LINC01135 | MAP1LC3A | 0.382260997  | 1.42E-17    |
| LINC01135 | KLF6     | 0.197497142  | 3.19E-05    |
| LINC01135 | ADD3     | 0.61364998   | 0           |
| LINC01135 | TSPAN7   | 0.46478184   | 0           |
| LINC01135 | KLF9     | 0.485972024  | 0           |
| LINC01135 | KCNQ1    | 0.640189267  | 0           |
| LINC01135 | MAN1A1   | 0.203116729  | 1.87E-05    |
| LINC01135 | MLF1     | 0.365243236  | 3.07E-15    |
| LINC01135 | RARB     | 0.636995804  | 0           |
| LINC01135 | CDC42EP2 | 0.388256737  | 0           |
| LINC01135 | FAM3B    | 0.285588922  | 1.31E-09    |
| LINC01135 | GADD45B  | 0.180498671  | 0.000146812 |
| LINC01135 | TMEM47   | 0.516152554  | 0           |
| LINC01135 | SDF2L1   | 0.256997535  | 5.28E-08    |
| LINC01135 | CCDC85A  | 0.563022918  | 0           |
| LINC01135 | CRYBG3   | 0.482405246  | 0           |
| LINC01135 | FBLN2    | 0.057601903  | 0.228316573 |
| LINC01135 | PEBP4    | 0.314972753  | 1.86E-11    |
| LINC01135 | CDADC1   | 0.655920707  | 0           |
| LINC01135 | FAM63A   | 0.748541489  | 0           |

|           |          |              |             |
|-----------|----------|--------------|-------------|
| LINC01135 | GLUL     | 0.526379012  | 0           |
| LINC01135 | FREM2    | 0.666806849  | 0           |
| LINC01135 | ACKR3    | 0.511532352  | 0           |
| LINC01135 | DENND6A  | 0.684507981  | 0           |
| LINC01135 | CLDN8    | 0.370027261  | 1.08E-15    |
| LINC01135 | UTS2R    | 0.296982805  | 2.17E-10    |
| LINC01135 | SCNN1B   | 0.426778425  | 0           |
| LINC01135 | TTC30A   | 0.663476797  | 0           |
| LINC01135 | CORO2B   | 0.537524857  | 0           |
| LINC01135 | TC2N     | 0.368109339  | 1.66E-15    |
| LINC01135 | ALDH2    | 0.462618257  | 0           |
| LINC01135 | GPR183   | 0.039803896  | 0.405297133 |
| LINC01135 | C4orf47  | 0.432602683  | 0           |
| LINC01135 | SLC25A42 | 0.629993022  | 0           |
| LINC01135 | LGMN     | 0.546461731  | 0           |
| LINC01135 | ACSF2    | 0.502239466  | 0           |
| LINC01135 | KIAA1467 | 0.706243671  | 0           |
| LINC01135 | PRKG1    | 0.59980625   | 0           |
| LINC01135 | GNAI1    | 0.596413364  | 0           |
| LINC01135 | ABCC4    | 0.35966308   | 9.46E-15    |
| LINC01135 | PRPS1    | 0.650531606  | 0           |
| LINC01135 | TSPAN5   | 0.426883952  | 0           |
| LINC01135 | CR2      | 0.163693122  | 0.000574818 |
| LINC01135 | CCDC170  | 0.619688696  | 0           |
| LINC01135 | RRAD     | -0.026572619 | 0.578571375 |
| LINC01135 | SCGB2A1  | 0.375935629  | 2.40E-16    |
| LINC01135 | SESN3    | 0.284143602  | 1.59E-09    |
| LINC01135 | SGK223   | 0.361677593  | 6.36E-15    |
| LINC01135 | NDRG2    | 0.582693601  | 0           |
| LINC01135 | C3orf52  | 0.319587282  | 9.14E-12    |
| LINC01135 | FLRT3    | -0.209878389 | 9.67E-06    |
| LINC01135 | MST1R    | -0.504845866 | 0           |
| LINC01135 | SDC1     | -0.356374444 | 1.78E-14    |
| LINC01135 | ST8SIA4  | -0.463544453 | 0           |
| LINC01135 | UBTD1    | -0.507591691 | 0           |
| LINC01135 | EPHA2    | -0.331908958 | 1.28E-12    |
| LINC01135 | TMEM130  | -0.274834689 | 5.52E-09    |
| LINC01135 | SPINK2   | -0.459237852 | 0           |
| LINC01135 | MMP16    | -0.409387916 | 0           |
| LINC01135 | SIGLEC15 | -0.427051603 | 0           |
| LINC01135 | RIN1     | -0.645702051 | 0           |
| LINC01135 | IL1RN    | -0.463837489 | 0           |
| LINC01135 | FCER1G   | -0.437565422 | 0           |
| LINC01135 | CD276    | -0.641499133 | 0           |
| LINC01135 | CTSB     | -0.321376558 | 6.91E-12    |
| LINC01135 | FAM171A2 | -0.198456103 | 2.92E-05    |
| LINC01135 | ASPHD1   | -0.590574213 | 0           |
| LINC01135 | C15orf48 | -0.422202334 | 0           |
| LINC01135 | DYSF     | -0.191740824 | 5.43E-05    |
| LINC01135 | PDZRN4   | -0.163144189 | 0.000609409 |
| LINC01135 | EFHD2    | -0.389938783 | 0           |

|           |          |              |             |
|-----------|----------|--------------|-------------|
| LINC01135 | ASF1B    | -0.466044616 | 0           |
| LINC01135 | AQP1     | -0.202141599 | 2.06E-05    |
| LINC01135 | ARRDC2   | -0.487636341 | 0           |
| LINC01135 | PRSS1    | -0.404130956 | 1.12E-18    |
| LINC01135 | MAPK13   | -0.332716011 | 1.12E-12    |
| LINC01135 | CST5     | -0.535813459 | 5.46E-34    |
| LINC01135 | AHR      | -0.388482683 | 0           |
| LINC01135 | BAX      | -0.652701572 | 0           |
| LINC01135 | C1orf115 | -0.088600692 | 0.063649242 |
| LINC01135 | PLK3     | -0.466708698 | 0           |
| LINC01135 | JAG2     | -0.357883024 | 1.33E-14    |
| LINC01135 | RAD23B   | -0.298698502 | 2.08E-10    |
| LINC01135 | CA12     | 0.101910121  | 0.032821254 |
| LINC01135 | ADTRP    | -0.272926838 | 7.09E-09    |
| LINC01135 | UCP2     | -0.378421466 | 1.09E-16    |
| LINC01135 | IGFBP2   | -0.419379916 | 0           |
| LINC01135 | LOXL2    | -0.355846243 | 1.96E-14    |
| LINC01135 | GPX1     | -0.589314274 | 0           |
| LINC01135 | P3H3     | -0.588574452 | 0           |
| LINC01135 | C2orf81  | -0.409454721 | 0           |
| LINC01135 | CDT1     | -0.52041008  | 0           |
| LINC01135 | SNX25    | -0.134277354 | 0.004858713 |
| LINC01135 | MTHFD1L  | -0.481448554 | 0           |
| LINC01135 | CDC42BPG | -0.371170765 | 8.71E-16    |
| LINC01135 | MSN      | -0.32149329  | 6.79E-12    |
| LINC01135 | SIGLEC6  | -0.32206192  | 4.72E-12    |
| LINC01135 | F2R      | -0.149249965 | 0.001731159 |
| LINC01135 | TMEM184A | -0.519957761 | 0           |
| LINC01135 | CKS2     | -0.446986812 | 0           |
| LINC01135 | TAX1BP3  | -0.710729979 | 0           |
| LINC01135 | PMEPA1   | -0.551581484 | 0           |
| LINC01135 | CXCL16   | -0.550820528 | 0           |
| LINC01135 | FAXC     | -0.557028172 | 0           |
| LINC01135 | VTCN1    | -0.504071057 | 1.14E-29    |
| LINC01135 | SH2D4A   | -0.325440333 | 3.63E-12    |
| LINC01135 | RNF24    | -0.313957341 | 2.18E-11    |
| LINC01135 | LY6G6C   | -0.418588472 | 4.74E-20    |
| LINC01135 | NID1     | -0.281998457 | 2.13E-09    |
| LINC01135 | STAC     | -0.56063892  | 0           |
| LINC01135 | RAB34    | -0.61624872  | 0           |
| LINC01135 | HES4     | -0.491842096 | 0           |
| LINC01135 | EPHA10   | -0.541037454 | 0           |
| LINC01135 | ENTPD2   | -0.478850665 | 0           |
| LINC01135 | DDB2     | -0.520959131 | 0           |
| LINC01135 | NKAIN4   | -0.446062601 | 0           |
| LINC01135 | TRIM29   | -0.44118312  | 0           |
| LINC01135 | ADCY8    | -0.530216398 | 3.41E-33    |
| LINC01135 | SFTA2    | -0.363327301 | 4.56E-15    |
| LINC01135 | NRIP1    | -0.314966938 | 1.87E-11    |
| LINC01135 | VWA1     | -0.295619502 | 3.23E-10    |
| LINC01135 | APLNR    | -0.175497068 | 0.000224328 |

|           |          |              |             |
|-----------|----------|--------------|-------------|
| LINC01135 | REN      | -0.437386592 | 6.13E-22    |
| LINC01135 | EDIL3    | -0.230712278 | 1.10E-06    |
| LINC01135 | AGRN     | -0.312023534 | 2.92E-11    |
| LINC01135 | TREM1    | -0.469433956 | 0           |
| LINC01135 | SRL      | -0.18752202  | 7.94E-05    |
| LINC01135 | RASGRF1  | -0.427709302 | 0           |
| LINC01135 | RMI2     | -0.544411475 | 0           |
| LINC01135 | SAMD1    | -0.622094112 | 0           |
| LINC01135 | MGAT4B   | -0.536683195 | 0           |
| LINC01135 | NXN      | -0.593460599 | 0           |
| LINC01135 | SH3BGRL3 | -0.713980602 | 0           |
| LINC01135 | CA11     | -0.354581198 | 2.49E-14    |
| LINC01135 | PLD3     | -0.371961778 | 6.83E-16    |
| LINC01135 | LURAP1L  | -0.414216903 | 0           |
| LINC01135 | CARNS1   | -0.136736243 | 0.004128209 |
| LINC01135 | PDLIM7   | -0.67544317  | 0           |
| LINC01135 | BCL2L1   | -0.622194674 | 0           |
| LINC01135 | GGT6     | -0.278357072 | 3.47E-09    |
| LINC01135 | DPYSL3   | -0.343718884 | 1.75E-13    |
| LINC01135 | FYN      | -0.500125242 | 0           |
| LINC01135 | TK1      | -0.522114394 | 0           |
| LINC01135 | AK1      | -0.372428564 | 6.09E-16    |
| LINC01135 | HIGD1B   | -0.155875603 | 0.00106332  |
| LINC01135 | TMEM59L  | -0.501202637 | 0           |
| LINC01135 | MEGF9    | -0.122030852 | 0.010531979 |
| LINC01135 | ZFP36L1  | -0.287218347 | 1.05E-09    |
| LINC01135 | ADRA1B   | -0.237185583 | 5.38E-07    |
| LINC01135 | EPHA4    | -0.33144203  | 1.38E-12    |
| LINC01135 | TCERG1L  | -0.095494969 | 0.045562044 |
| LINC01135 | NGFR     | -0.291652601 | 5.66E-10    |
| LINC01135 | EBI3     | -0.574469742 | 0           |
| LINC01135 | S100A10  | -0.64130737  | 0           |
| LINC01135 | S100B    | -0.473931754 | 0           |
| LINC01135 | CD44     | -0.155525407 | 0.001091588 |
| LINC01135 | BHLHE41  | -0.238537574 | 4.62E-07    |
| LINC01135 | FBXO2    | -0.473960121 | 0           |
| LINC01135 | SLC30A2  | -0.318753847 | 1.04E-11    |
| LINC01135 | FRMD5    | -0.491718414 | 0           |
| LINC01135 | SAMD11   | -0.316377508 | 1.50E-11    |
| LINC01135 | SIPA1L2  | -0.295285334 | 3.39E-10    |
| LINC01135 | S100A16  | -0.661830635 | 0           |
| LINC01135 | PPL      | -0.379594317 | 6.94E-17    |
| LINC01135 | ARHGD1B  | -0.336948856 | 5.54E-13    |
| LINC01135 | CDC42EP3 | -0.520696307 | 0           |
| LINC01135 | RUNX2    | -0.438385667 | 0           |
| LINC01135 | LAMC2    | -0.438133622 | 0           |
| LINC01135 | BRINP1   | -0.521327766 | 0           |
| LINC01135 | GPRC5B   | -0.237396636 | 5.26E-07    |
| LINC01135 | AQP5     | -0.167724535 | 0.00042403  |
| LINC01135 | PLAG1    | -0.25684123  | 5.38E-08    |
| LINC01135 | PTPRU    | -0.491767347 | 0           |



|           |          |              |             |
|-----------|----------|--------------|-------------|
| LINC01135 | ANGPTL4  | -0.479891183 | 0           |
| LINC01135 | PALM3    | -0.286961054 | 1.08E-09    |
| LINC01135 | ACP5     | -0.478975057 | 0           |
| LINC01135 | DLG4     | -0.242435826 | 2.96E-07    |
| LINC01135 | ETNK2    | -0.373586948 | 4.55E-16    |
| LINC01135 | CD109    | -0.402713486 | 0           |
| LINC01135 | SNX22    | -0.362141968 | 5.79E-15    |
| LINC01135 | TMEM98   | -0.375928253 | 2.41E-16    |
| LINC01135 | CTHRC1   | -0.499571085 | 0           |
| LINC01135 | S100A2   | -0.545420646 | 0           |
| LINC01135 | C11orf80 | -0.634640599 | 0           |
| LINC01135 | SREBF1   | -0.446153377 | 0           |
| LINC01135 | PRSS22   | -0.546398188 | 0           |
| LINC01135 | CMTM3    | -0.715073599 | 0           |
| LINC01135 | RDH5     | -0.312259409 | 2.82E-11    |
| LINC01135 | MYH10    | -0.314194351 | 2.10E-11    |
| LINC01135 | EVPL     | -0.444137588 | 0           |
| LINC01135 | SCD      | -0.40749439  | 0           |
| LINC01135 | CD151    | -0.555548243 | 0           |
| LINC01135 | S100A4   | -0.527571862 | 0           |
| LINC01135 | BNIP1    | -0.274487188 | 5.78E-09    |
| LINC01135 | MAP3K6   | -0.533269459 | 0           |
| LINC01135 | MANEAL   | -0.395235265 | 0           |
| LINC01135 | CD207    | -0.411918299 | 2.08E-19    |
| LINC01135 | CD1A     | -0.452518237 | 1.51E-23    |
| LINC01135 | C3       | -0.447631604 | 0           |
| LINC01135 | NT5E     | -0.400047657 | 0           |
| LINC01135 | CACNG4   | -0.579231483 | 1.07E-40    |
| LINC01135 | FHOD1    | -0.466906844 | 0           |
| LINC01135 | LEMD1    | -0.56900575  | 0           |
| LINC01135 | ATP11A   | -0.160123483 | 0.000770188 |
| LINC01135 | PPAP2C   | -0.492179668 | 0           |
| LINC01135 | DRAM1    | -0.510928551 | 0           |
| LINC01135 | CDA      | -0.353345229 | 3.13E-14    |
| LINC01135 | CCND2    | -0.301780907 | 1.33E-10    |
| LINC01135 | LCN6     | -0.250863513 | 1.00E-07    |
| LINC01135 | CDH4     | -0.410181353 | 0           |
| LINC01135 | MMP11    | -0.604697788 | 0           |
| LINC01135 | B3GAT1   | -0.243492512 | 2.62E-07    |
| LINC01135 | SPP1     | -0.261690216 | 2.96E-08    |
| LINC01135 | HLA-DQB1 | -0.436436399 | 0           |
| LINC01135 | SDC3     | -0.586120811 | 0           |
| LINC01135 | CX3CL1   | -0.380355983 | 4.95E-17    |
| LINC01135 | SDK1     | -0.47913207  | 0           |
| LINC01135 | DOCK9    | -0.197889747 | 3.08E-05    |
| LINC01135 | CSF2     | -0.616742218 | 2.35E-47    |
| LINC01135 | GRHL3    | -0.526793176 | 0           |
| LINC01135 | TMEM92   | -0.652889675 | 1.11E-54    |
| LINC01135 | BASP1    | -0.638833588 | 0           |
| LINC01135 | HRH1     | -0.529061861 | 0           |
| LINC01135 | ESM1     | -0.038926633 | 0.415733138 |

|           |          |              |             |
|-----------|----------|--------------|-------------|
| LINC01135 | B4GALNT3 | -0.452205284 | 0           |
| LINC01135 | LMO3     | -0.133551715 | 0.00509555  |
| LINC01135 | C9orf16  | -0.694431616 | 0           |
| LINC01135 | SEMA3F   | -0.352306555 | 3.79E-14    |
| LINC01135 | PLA2G12B | -0.176742372 | 0.000197692 |
| LINC01135 | KLK6     | -0.413172533 | 1.58E-19    |
| LINC01135 | ST3GAL5  | -0.349224576 | 6.62E-14    |
| LINC01135 | FAM132B  | -0.124942201 | 0.008812535 |
| LINC01135 | CDKN1A   | -0.303226937 | 1.08E-10    |
| LINC01135 | E2F1     | -0.499640868 | 0           |
| LINC01135 | B3GNT8   | -0.568886465 | 0           |
| LINC01135 | MTMR11   | -0.515318694 | 0           |
| LINC01135 | MYO1G    | -0.488867487 | 0           |
| LINC01135 | TMSB10   | -0.744017735 | 0           |
| LINC01135 | UNC5CL   | -0.575358777 | 0           |
| LINC01135 | ABR      | -0.512747896 | 0           |
| LINC01135 | PLP2     | -0.698775804 | 0           |
| LINC01135 | SRCIN1   | -0.354096824 | 2.72E-14    |
| LINC01135 | PDE9A    | -0.578837475 | 0           |
| LINC01135 | TREM2    | -0.433111453 | 0           |
| LINC01135 | KDEL3    | -0.401890831 | 0           |
| LINC01135 | PC       | -0.374747459 | 3.35E-16    |
| LINC01135 | C2CD4A   | -0.49985561  | 0           |
| LINC01135 | PELI1    | -0.470926225 | 0           |
| LINC01135 | SSX1     | -0.347857408 | 8.44E-14    |
| LINC01135 | MROH6    | -0.53189293  | 0           |
| LINC01135 | ESPN     | -0.44917933  | 0           |
| LINC01135 | BMP1     | -0.475691669 | 0           |
| LINC01135 | TM4SF4   | -0.378684843 | 2.04E-16    |
| LINC01135 | CORO2A   | -0.392490149 | 0           |
| LINC01135 | CD164L2  | -0.484087522 | 3.59E-27    |
| LINC01135 | CTSS     | -0.35683811  | 1.63E-14    |
| LINC01135 | CLU      | -0.512910299 | 0           |
| LINC01135 | TMSB4X   | -0.650951869 | 0           |
| LINC01135 | WNT10A   | -0.523905532 | 2.58E-32    |
| LINC01135 | NAPSA    | -0.43160415  | 0           |
| LINC01135 | PLEKHA4  | -0.380648025 | 4.28E-17    |
| LINC01135 | SFTPA1   | -0.173397458 | 0.000261821 |
| LINC01135 | C1orf116 | -0.321048772 | 7.28E-12    |
| LINC01135 | TM4SF1   | -0.43736061  | 0           |
| LINC01135 | SEL1L3   | -0.379976852 | 5.89E-17    |
| LINC01135 | VASN     | -0.578557914 | 0           |
| LINC01135 | NPTXR    | -0.485712462 | 0           |
| LINC01135 | PDE4C    | -0.473036336 | 0           |
| LINC01135 | CDC42EP1 | -0.6062475   | 0           |
| LINC01135 | ENDOD1   | -0.42356553  | 0           |
| LINC01135 | RYR1     | -0.478210838 | 0           |
| LINC01135 | IL1RAP   | -0.396043453 | 0           |
| LINC01135 | SLC35F2  | -0.436636901 | 7.33E-22    |
| LINC01135 | ISYNA1   | -0.541007526 | 0           |
| LINC01135 | HLA-G    | -0.475350976 | 0           |

|           |          |              |             |
|-----------|----------|--------------|-------------|
| LINC01135 | CDKN2B   | -0.518967029 | 0           |
| LINC01135 | ALDH1A3  | -0.463072419 | 0           |
| LINC01135 | CLIP3    | -0.554857922 | 0           |
| LINC01135 | ULBP2    | -0.411337609 | 0           |
| LINC01135 | ETHE1    | -0.628887827 | 0           |
| LINC01135 | XPR1     | -0.450148929 | 0           |
| LINC01135 | SPTBN2   | -0.480447893 | 0           |
| LINC01135 | IVL      | -0.566578455 | 1.22E-38    |
| LINC01135 | MARCO    | -0.463574097 | 0           |
| LINC01135 | PLXND1   | -0.329005835 | 2.05E-12    |
| LINC01135 | EMILIN2  | -0.456578973 | 0           |
| LINC01135 | PLAUR    | -0.606105096 | 0           |
| LINC01135 | CDC42EP5 | -0.658399311 | 0           |
| LINC01135 | TRPC5    | -0.13849808  | 0.003642043 |
| LINC01135 | TMEM100  | -0.436343779 | 0           |
| LINC01135 | QSOX1    | -0.530765041 | 0           |
| LINC01135 | ARHGAP23 | -0.451710839 | 0           |
| LINC01135 | MDF1     | -0.489175699 | 0           |
| LINC01135 | FSTL3    | -0.608661852 | 0           |
| LINC01135 | INF2     | -0.466628843 | 0           |
| LINC01135 | TGFBR1   | -0.403372461 | 0           |
| LINC01135 | TGFBI    | -0.436628588 | 0           |
| LINC01135 | ERBB3    | -0.428466145 | 0           |
| LINC01135 | CCL18    | -0.37326129  | 4.95E-16    |
| LINC01135 | CCL17    | -0.499486355 | 4.42E-29    |
| LINC01135 | C16orf45 | -0.378532099 | 1.05E-16    |
| LINC01135 | PRDM1    | -0.216767844 | 4.83E-06    |
| LINC01135 | TRIM47   | -0.698770839 | 0           |
| LINC01135 | CNFN     | -0.542181086 | 0           |
| LINC01135 | ARMCX3   | -0.207907278 | 1.18E-05    |
| LINC01135 | RAMP1    | -0.427109473 | 0           |
| LINC01135 | GABRD    | -0.172473384 | 0.000288295 |
| LINC01135 | COL13A1  | -0.197283819 | 3.26E-05    |
| LINC01135 | S100A5   | -0.423047966 | 0           |
| LINC01135 | MISP     | -0.574484351 | 0           |
| LINC01135 | HES6     | -0.319149006 | 9.79E-12    |
| LINC01135 | PSD3     | -0.272535934 | 7.46E-09    |
| LINC01135 | DOK7     | -0.5350993   | 0           |
| LINC01135 | ZMAT3    | -0.364404128 | 3.66E-15    |
| LINC01135 | MFAP2    | -0.51351793  | 0           |
| LINC01135 | TMEM79   | -0.510400775 | 0           |
| LINC01135 | SLC1A5   | -0.549554348 | 0           |
| LINC01135 | BBC3     | -0.626811331 | 0           |
| LINC01135 | HLA-DQB2 | -0.528027301 | 0           |
| LINC01135 | C1QL1    | -0.389846447 | 0           |
| LINC01135 | TMEM215  | -0.132681555 | 0.005362992 |
| LINC01135 | PNP      | -0.442328597 | 0           |
| LINC01135 | ARNTL    | -0.380925884 | 3.69E-17    |
| LINC01135 | CLDN2    | -0.308876604 | 3.70E-11    |
| LINC01135 | MVP      | -0.696304859 | 0           |
| LINC01135 | LGALS1   | -0.687066865 | 0           |

|           |           |              |             |
|-----------|-----------|--------------|-------------|
| LINC01135 | BIRC7     | -0.503068861 | 1.54E-29    |
| LINC01135 | COL8A1    | -0.351796651 | 4.16E-14    |
| LINC01135 | PERP      | -0.505914183 | 0           |
| LINC01135 | GJA4      | -0.231673933 | 9.92E-07    |
| LINC01135 | IGFL2     | -0.57021978  | 3.20E-39    |
| LINC01135 | DAPK2     | -0.253955838 | 7.64E-08    |
| LINC01135 | MAMLD1    | -0.412581663 | 0           |
| LINC01135 | ETV5      | -0.251233132 | 1.06E-07    |
| LINC01135 | RUNX1     | -0.596860435 | 0           |
| LINC01135 | LONRF2    | -0.132026541 | 0.005627575 |
| LINC01135 | SPOCK1    | -0.197919249 | 3.07E-05    |
| LINC01135 | XKRX      | -0.322118082 | 6.15E-12    |
| LINC01135 | TGFB1     | -0.463582466 | 0           |
| LINC01135 | ERP27     | -0.137806262 | 0.003842577 |
| LINC01135 | TNFRSF10C | -0.274490734 | 5.78E-09    |
| LINC01135 | PALM      | -0.595710987 | 0           |
| LINC01135 | TSC22D1   | -0.326960402 | 2.85E-12    |
| LINC01135 | TGM2      | -0.494091065 | 0           |
| LINC01135 | UBE2QL1   | -0.209924911 | 9.63E-06    |
| LINC01135 | ECE1      | -0.519724155 | 0           |
| LINC01135 | COL8A2    | -0.505030112 | 0           |
| LINC01135 | HIST3H2A  | -0.465763637 | 0           |
| LINC01135 | TNFRSF21  | -0.506704074 | 0           |
| LINC01135 | SOX4      | -0.560928835 | 0           |
| LINC01135 | ELF3      | -0.54896927  | 0           |
| LINC01135 | TPD52L1   | -0.359209343 | 1.03E-14    |
| LINC01135 | INHBB     | -0.36471234  | 3.43E-15    |
| LINC01135 | HPN       | -0.408396191 | 0           |
| LINC01135 | MMP7      | -0.484737018 | 3.00E-27    |
| LINC01135 | RAB27A    | -0.323607798 | 4.86E-12    |
| LINC01135 | IGF2BP2   | -0.412341958 | 0           |
| LINC01135 | ITGB4     | -0.554693958 | 0           |
| LINC01135 | PPP1R1B   | -0.498201789 | 0           |
| LINC01135 | NPDC1     | -0.530684052 | 0           |
| LINC01135 | CCL13     | -0.563350903 | 3.97E-38    |
| LINC01135 | SPINT1    | -0.601050304 | 0           |
| LINC01135 | HEY2      | -0.235971315 | 6.17E-07    |
| LINC01135 | CST2      | -0.506078214 | 6.29E-30    |
| LINC01135 | ADM       | -0.316026319 | 1.59E-11    |
| LINC01135 | VSTM2L    | -0.509426212 | 0           |
| LINC01135 | FAM84A    | -0.550046664 | 0           |
| LINC01135 | P4HA2     | -0.418191605 | 0           |
| LINC01135 | LPL       | -0.338198583 | 4.49E-13    |
| LINC01135 | TMEM173   | -0.529708354 | 0           |
| LINC01135 | DHRS3     | -0.449442296 | 0           |
| LINC01135 | SCN1B     | -0.607009733 | 0           |
| LINC01135 | GLT1D1    | -0.216108017 | 5.16E-06    |
| LINC01135 | PHYHIP    | -0.500790458 | 0           |
| LINC01135 | BHLHE40   | -0.430950422 | 0           |
| LINC01135 | BID       | -0.555970776 | 0           |
| LINC01135 | POSTN     | -0.390477764 | 0           |

|           |            |              |             |
|-----------|------------|--------------|-------------|
| LINC01135 | ITGA3      | -0.572567422 | 0           |
| LINC01135 | RSP04      | -0.476792609 | 0           |
| LINC01135 | ADAMTS9    | -0.156010916 | 0.001052579 |
| LINC01135 | ABTB2      | -0.468542368 | 0           |
| LINC01135 | KCNQ3      | -0.477850146 | 0           |
| LINC01135 | ANXA1      | -0.390214089 | 0           |
| LINC01135 | S100A11    | -0.739160523 | 0           |
| LINC01135 | CEACAM6    | -0.491056989 | 5.05E-28    |
| LINC01135 | IER5L      | -0.628493094 | 0           |
| LINC01135 | KRT80      | -0.401129024 | 0           |
| LINC01135 | CDH6       | -0.570092223 | 0           |
| LINC01135 | UNC5B      | -0.49220605  | 0           |
| LINC01135 | PLEKHN1    | -0.592172292 | 0           |
| LINC01135 | SYTL1      | -0.557050298 | 0           |
| LINC01135 | TMEM163    | -0.499903125 | 0           |
| LINC01135 | C4orf48    | -0.503428345 | 0           |
| LINC01135 | B3GNT7     | -0.319812236 | 8.83E-12    |
| LINC01135 | BAIAP3     | -0.456769886 | 0           |
| LINC01135 | PHLDA2     | -0.590922565 | 0           |
| LINC01135 | GAP43      | -0.557100845 | 3.73E-37    |
| LINC01135 | S100A1     | -0.417950907 | 0           |
| LINC01135 | PTPRE      | -0.443497619 | 0           |
| LINC01135 | CCND1      | -0.399370243 | 0           |
| LINC01135 | ST6GALNAC5 | -0.519068527 | 1.18E-31    |
| LINC01135 | KRT17      | -0.389150594 | 0           |
| LINC01135 | HPCAL4     | -0.31770638  | 1.22E-11    |
| LINC01135 | GABBR2     | -0.225558058 | 1.92E-06    |
| LINC01135 | DIRAS3     | -0.305379031 | 7.87E-11    |
| LINC01135 | SERINC2    | -0.488643952 | 0           |
| LINC01135 | PTCHD4     | -0.38181109  | 2.09E-17    |
| LINC01135 | EPS8       | -0.207921746 | 1.17E-05    |
| LINC01135 | LY6E       | -0.609747899 | 0           |
| LINC01135 | UPP1       | -0.637058213 | 0           |
| LINC01135 | AHNAK2     | -0.525773792 | 0           |
| LINC01135 | PLXNC1     | -0.347198291 | 9.49E-14    |
| LINC01135 | TNC        | -0.546201743 | 0           |
| LINC01135 | DUSP4      | -0.456619397 | 0           |
| LINC01135 | NRCAM      | -0.328272963 | 2.31E-12    |
| LINC01135 | NRP2       | -0.355324991 | 2.17E-14    |
| LINC01135 | CTSC       | -0.517909349 | 0           |
| LINC01135 | AMIGO2     | -0.382493468 | 1.11E-17    |
| LINC01135 | NAB2       | -0.406817969 | 0           |
| LINC01135 | TBC1D2     | -0.531787261 | 0           |
| LINC01135 | PHLDA3     | -0.62860089  | 0           |
| LINC01135 | PTP4A3     | -0.570547662 | 0           |
| LINC01135 | CRABP2     | -0.40697782  | 0           |
| LINC01135 | GOS2       | -0.492283209 | 0           |
| LINC01135 | S100A6     | -0.664435332 | 0           |
| LINC01135 | FOXQ1      | -0.412043958 | 0           |
| LINC01135 | LRG1       | -0.450745496 | 0           |
| LINC01135 | LAMP5      | -0.512483653 | 0           |

|           |         |              |             |
|-----------|---------|--------------|-------------|
| LINC01135 | ALDH3B1 | -0.53028393  | 0           |
| LINC01135 | CDH2    | -0.076785659 | 0.108117617 |
| LINC01135 | SCG5    | -0.295993243 | 3.07E-10    |
| LINC01135 | ZCCHC16 | -0.157621235 | 0.000920197 |
| LINC01135 | GRB7    | -0.558563417 | 0           |
| LINC01135 | TIAM1   | -0.400753581 | 0           |
| LINC01135 | FXD5    | -0.599672498 | 0           |
| LINC01135 | CLDN9   | -0.482824516 | 0           |
| LINC01135 | FAM43A  | -0.431017511 | 0           |
| LINC01135 | CHST2   | -0.499726822 | 0           |
| LINC01135 | HMGA2   | -0.5001251   | 0           |
| LINC01135 | GALNT7  | -0.321257556 | 7.04E-12    |
| LINC01135 | CBLN1   | -0.362127217 | 5.81E-15    |
| LINC01135 | STRA6   | -0.574319536 | 0           |
| LINC01135 | MUC21   | -0.447090011 | 5.83E-23    |
| LINC01135 | PRR36   | -0.57755938  | 0           |
| LINC01135 | NFE2L3  | -0.553281828 | 0           |
| LINC01135 | NR1D1   | -0.361599866 | 6.46E-15    |
| LINC01135 | MUC1    | -0.583143792 | 0           |
| LINC01135 | NAT8L   | -0.290811365 | 6.36E-10    |
| LINC01135 | APOC1   | -0.359090484 | 1.06E-14    |
| LINC01135 | EVA1A   | -0.61859499  | 0           |
| LINC01135 | ENTPD1  | -0.208068831 | 1.16E-05    |
| LINC01135 | COL1A1  | -0.532132351 | 0           |
| LINC01135 | FNDC4   | -0.443613216 | 0           |
| LINC01135 | FRMD3   | 0.016646431  | 0.727879764 |
| LINC01135 | SHROOM4 | -0.345141511 | 1.36E-13    |
| LINC01135 | NELL2   | -0.269460196 | 1.11E-08    |
| LINC01135 | EPHB3   | -0.586479092 | 0           |
| LINC01135 | TMC6    | -0.624108625 | 0           |
| LINC01135 | NOD1    | -0.387062893 | 0           |
| LINC01135 | GGCT    | -0.555876596 | 0           |
| LINC01135 | ICAM1   | -0.428529688 | 0           |
| LINC01135 | PRSS23  | -0.426971323 | 0           |
| LINC01135 | CFI     | -0.503233887 | 0           |
| LINC01135 | CD55    | -0.50929175  | 0           |
| LINC01135 | RASD2   | -0.416965423 | 0           |
| LINC01135 | KLK11   | -0.311144067 | 2.61E-11    |
| LINC01135 | ICAM5   | -0.383179676 | 2.98E-18    |
| LINC01135 | ADORA1  | -0.457233126 | 0           |
| LINC01135 | ITGA2   | -0.48655001  | 0           |
| LINC01135 | ABCC3   | -0.31355963  | 2.31E-11    |
| LINC01135 | MFGE8   | -0.522173541 | 0           |
| LINC01135 | STK32A  | -0.259333876 | 3.96E-08    |
| LINC01135 | CYSLTR2 | -0.298695808 | 2.08E-10    |
| LINC01135 | LAD1    | -0.545780345 | 0           |
| LINC01135 | MGAT3   | -0.492887293 | 0           |
| LINC01135 | IGFBP6  | -0.503058434 | 0           |
| LINC01135 | CYP2S1  | -0.614810066 | 0           |
| LINC01135 | KCNJ2   | -0.436537387 | 0           |
| LINC01135 | FAM20A  | -0.54946726  | 0           |

|           |           |              |             |
|-----------|-----------|--------------|-------------|
| LINC01135 | TGFA      | -0.302270529 | 1.24E-10    |
| LINC01135 | MXRA8     | -0.617940979 | 0           |
| LINC01135 | C8orf4    | -0.472011988 | 0           |
| LINC01135 | CLDN10    | -0.561843352 | 6.85E-38    |
| LINC01135 | PDE5A     | -0.282353475 | 2.03E-09    |
| LINC01135 | APOE      | -0.34782436  | 8.49E-14    |
| LINC01135 | SPOCK2    | -0.5183889   | 0           |
| LINC01135 | TENM1     | -0.153405651 | 0.001278022 |
| LINC01135 | SLIT1     | -0.284440892 | 1.53E-09    |
| LINC01135 | CXCL14    | -0.390654635 | 0           |
| LINC01135 | ECM1      | -0.257840898 | 4.76E-08    |
| LINC01135 | DUSP5     | -0.521300249 | 0           |
| LINC01135 | SEZ6L2    | -0.488393184 | 0           |
| LINC01135 | THRSP     | -0.098820199 | 0.038517362 |
| LINC01135 | C19orf33  | -0.643314223 | 0           |
| LINC01135 | MPZL2     | -0.384673221 | 0           |
| LINC01135 | CTSH      | -0.543163025 | 0           |
| LINC01135 | CYP1B1    | -0.437613647 | 0           |
| LINC01135 | ALOX5     | -0.517937007 | 0           |
| LINC01135 | SYTL5     | -0.424349054 | 1.29E-20    |
| LINC01135 | TNFRSF12A | -0.52112508  | 0           |
| LINC01135 | DUSP6     | -0.432462122 | 0           |
| LINC01135 | ALOX15B   | -0.495048891 | 0           |
| LINC01135 | SDC4      | -0.478261758 | 0           |
| LINC01135 | MDK       | -0.574305353 | 0           |
| LINC01135 | KRT19     | -0.669728836 | 0           |
| LINC01135 | MET       | -0.399822704 | 0           |
| LINC01135 | TESC      | -0.313196101 | 2.44E-11    |
| LINC01135 | CXCL17    | -0.498939218 | 5.19E-29    |
| LINC01135 | NPC2      | -0.470592908 | 0           |
| LINC01135 | COMP      | -0.544515158 | 0           |
| LINC01135 | TUSC3     | -0.453794852 | 0           |
| LINC01135 | TMPRSS4   | -0.572264174 | 0           |
| LINC01135 | LGALS3    | -0.575027162 | 0           |
| LINC01135 | CRLF1     | -0.527676112 | 0           |
| LINC01135 | CTXN1     | -0.626881115 | 0           |
| LINC01135 | PCSK1N    | -0.462642653 | 0           |
| LINC01135 | NMU       | -0.418365415 | 4.98E-20    |
| LINC01135 | GALE      | -0.608416899 | 0           |
| LINC01135 | PCSK2     | -0.224481089 | 2.16E-06    |
| LINC01135 | GJB3      | -0.541448498 | 0           |
| LINC01135 | SLPI      | -0.601517799 | 0           |
| LINC01135 | AGR2      | -0.308150954 | 5.22E-11    |
| LINC01135 | MRC2      | -0.562222673 | 0           |
| LINC01135 | GOLT1A    | -0.481947254 | 0           |
| LINC01135 | SLC27A6   | -0.436643993 | 7.31E-22    |
| LINC01135 | KCNN4     | -0.702717599 | 0           |
| LINC01135 | ETV4      | -0.456771108 | 5.16E-24    |
| LINC01135 | SYT12     | -0.555582    | 0           |
| LINC01135 | PVRL4     | -0.569499627 | 0           |
| LINC01135 | PLCD3     | -0.494778408 | 0           |

|               |          |              |             |
|---------------|----------|--------------|-------------|
| LINC01135     | PLAU     | -0.593091539 | 0           |
| LINC01135     | LRRK2    | -0.174402511 | 0.00024577  |
| LINC01135     | SFN      | -0.631635921 | 0           |
| LINC01135     | LPAR5    | -0.371005228 | 8.59E-16    |
| LINC01135     | NGEF     | -0.519938471 | 0           |
| LINC01135     | DTX4     | -0.356278988 | 1.81E-14    |
| LINC01135     | CST6     | -0.493890649 | 0           |
| LINC01135     | QPCT     | -0.413237234 | 0           |
| LINC01135     | TIMP1    | -0.637009704 | 0           |
| LINC01135     | CAMK2N1  | -0.572393388 | 0           |
| LINC01135     | KLHDC8A  | -0.272520332 | 7.47E-09    |
| LINC01135     | PDLIM4   | -0.670942111 | 0           |
| LINC01135     | SCEL     | -0.352325278 | 3.77E-14    |
| LINC01135     | LCN2     | -0.595819492 | 0           |
| LINC01135     | PROS1    | -0.412487908 | 0           |
| LINC01135     | GABRB2   | -0.402013945 | 0           |
| LINC01135     | TMPRSS6  | -0.550335161 | 0           |
| LINC01135     | KLK7     | -0.385895064 | 4.88E-17    |
| LINC01135     | PDZK1IP1 | -0.52957602  | 0           |
| LINC01135     | CDH3     | -0.520260583 | 0           |
| LINC01135     | LRP4     | -0.262034881 | 2.84E-08    |
| LINC01135     | IGSF1    | -0.267950482 | 1.35E-08    |
| LINC01135     | B3GNT3   | -0.567102438 | 0           |
| LINC01135     | CLDN1    | -0.514842547 | 0           |
| LINC01135     | GDF15    | -0.53222029  | 0           |
| LINC01135     | ARHGAP36 | -0.233767593 | 7.32E-07    |
| LINC01135     | LAMB3    | -0.551117251 | 0           |
| LINC01135     | KLK10    | -0.443503576 | 0           |
| LINC01135     | DPP4     | -0.331298632 | 1.41E-12    |
| LINC01135     | METTL7B  | -0.442771554 | 0           |
| LINC01135     | LIPH     | -0.496555343 | 0           |
| LINC01135     | CLDN16   | -0.419811101 | 0           |
| LINC01135     | CHI3L1   | -0.457380637 | 0           |
| LINC01135     | SLC22A31 | -0.557065743 | 3.78E-37    |
| LINC01135     | TACSTD2  | -0.511143718 | 0           |
| LINC01135     | SFTPB    | -0.535524812 | 0           |
| LINC01135     | RXRG     | -0.292466463 | 5.05E-10    |
| LINC01135     | DCSTAMP  | -0.457279578 | 4.54E-24    |
| LINC01135     | CITED1   | -0.349422865 | 6.38E-14    |
| LINC01135     | SERPINA1 | -0.625425015 | 0           |
| LINC01135     | PRR15    | -0.402200603 | 0           |
| LINC01135     | SLC34A2  | -0.433170173 | 0           |
| LINC01135     | FN1      | -0.587195227 | 0           |
| LINC01135     | ZCCHC12  | -0.258594621 | 4.34E-08    |
| RP11-701H24.7 | TFF3     | 0.354531838  | 2.51E-14    |
| RP11-701H24.7 | CCL21    | 0.169432456  | 0.000362892 |
| RP11-701H24.7 | TPO      | 0.336556109  | 5.92E-13    |
| RP11-701H24.7 | MT1G     | 0.224606189  | 2.13E-06    |
| RP11-701H24.7 | DIO1     | 0.345556952  | 1.27E-13    |
| RP11-701H24.7 | DPT      | 0.131445551  | 0.005811798 |
| RP11-701H24.7 | CDH16    | 0.314611068  | 1.97E-11    |



|               |           |             |             |
|---------------|-----------|-------------|-------------|
| RP11-701H24.7 | CRABP1    | 0.326388037 | 2.35E-12    |
| RP11-701H24.7 | SLC26A7   | 0.541726924 | 0           |
| RP11-701H24.7 | MT1H      | 0.172276255 | 0.000287349 |
| RP11-701H24.7 | SLC26A4   | 0.400785636 | 0           |
| RP11-701H24.7 | SLC5A8    | 0.353441241 | 2.31E-14    |
| RP11-701H24.7 | PKHD1L1   | 0.442235354 | 1.91E-22    |
| RP11-701H24.7 | TFCP2L1   | 0.402050965 | 0           |
| RP11-701H24.7 | WSCD2     | 0.424047366 | 1.38E-20    |
| RP11-701H24.7 | IPCEF1    | 0.39277198  | 0           |
| RP11-701H24.7 | SLC5A5    | 0.257628955 | 4.37E-08    |
| RP11-701H24.7 | MT1F      | 0.20941444  | 1.01E-05    |
| RP11-701H24.7 | FOSB      | 0.460093272 | 0           |
| RP11-701H24.7 | SEMA3D    | 0.468355514 | 2.56E-25    |
| RP11-701H24.7 | BMP8A     | 0.424088342 | 0           |
| RP11-701H24.7 | MATN2     | 0.45238485  | 0           |
| RP11-701H24.7 | PLA2R1    | 0.451612405 | 0           |
| RP11-701H24.7 | COL23A1   | 0.298649994 | 2.10E-10    |
| RP11-701H24.7 | HGD       | 0.283215703 | 1.81E-09    |
| RP11-701H24.7 | TCEAL2    | 0.285943515 | 1.25E-09    |
| RP11-701H24.7 | CHRD1     | 0.286337619 | 9.92E-10    |
| RP11-701H24.7 | TNFRSF11B | 0.399644131 | 0           |
| RP11-701H24.7 | FAM167A   | 0.419846277 | 0           |
| RP11-701H24.7 | KIT       | 0.452999572 | 0           |
| RP11-701H24.7 | SLC4A4    | 0.480316552 | 0           |
| RP11-701H24.7 | SMOC2     | 0.278214384 | 3.54E-09    |
| RP11-701H24.7 | FHL1      | 0.486758085 | 0           |
| RP11-701H24.7 | OTOS      | 0.104673959 | 0.028351726 |
| RP11-701H24.7 | IGFBPL1   | 0.399912685 | 2.74E-18    |
| RP11-701H24.7 | HBB       | 0.282071928 | 2.11E-09    |
| RP11-701H24.7 | BEX1      | 0.317113643 | 1.34E-11    |
| RP11-701H24.7 | FABP4     | 0.341408973 | 1.91E-13    |
| RP11-701H24.7 | LMOD1     | 0.408601004 | 0           |
| RP11-701H24.7 | SOD3      | 0.166236947 | 0.000477521 |
| RP11-701H24.7 | TMEM171   | 0.268741082 | 1.22E-08    |
| RP11-701H24.7 | PI16      | 0.221486482 | 2.96E-06    |
| RP11-701H24.7 | ZMAT4     | 0.33152942  | 1.01E-12    |
| RP11-701H24.7 | MFAP4     | 0.231769674 | 9.82E-07    |
| RP11-701H24.7 | CWH43     | 0.336699519 | 4.25E-13    |
| RP11-701H24.7 | SPX       | 0.446543287 | 0           |
| RP11-701H24.7 | APOD      | 0.152029831 | 0.001414268 |
| RP11-701H24.7 | DPP6      | 0.377150606 | 1.66E-16    |
| RP11-701H24.7 | MMRN1     | 0.354921465 | 2.33E-14    |
| RP11-701H24.7 | WDR72     | 0.486566322 | 0           |
| RP11-701H24.7 | MPPED2    | 0.426576732 | 0           |
| RP11-701H24.7 | PAPSS2    | 0.290667826 | 6.49E-10    |
| RP11-701H24.7 | DCN       | 0.084754352 | 0.076081416 |
| RP11-701H24.7 | SORBS2    | 0.460634664 | 0           |
| RP11-701H24.7 | EGR2      | 0.507408012 | 0           |
| RP11-701H24.7 | EDN3      | 0.383523153 | 7.84E-17    |
| RP11-701H24.7 | DIO2      | 0.372912087 | 5.40E-16    |
| RP11-701H24.7 | ITPR1     | 0.48088617  | 0           |

|               |            |             |             |
|---------------|------------|-------------|-------------|
| RP11-701H24.7 | CFD        | 0.04318657  | 0.3665421   |
| RP11-701H24.7 | CPXM1      | 0.223735877 | 2.33E-06    |
| RP11-701H24.7 | ELMO1      | 0.332161995 | 1.23E-12    |
| RP11-701H24.7 | GPC3       | 0.300122629 | 1.37E-10    |
| RP11-701H24.7 | MYOC       | 0.377983904 | 2.34E-16    |
| RP11-701H24.7 | DEPTOR     | 0.455561434 | 0           |
| RP11-701H24.7 | DGKI       | 0.516959466 | 0           |
| RP11-701H24.7 | CARTPT     | 0.300132537 | 1.37E-10    |
| RP11-701H24.7 | IYD        | 0.369326728 | 1.27E-15    |
| RP11-701H24.7 | LYVE1      | 0.298731834 | 2.07E-10    |
| RP11-701H24.7 | CLCNKB     | 0.356278421 | 1.81E-14    |
| RP11-701H24.7 | NCAM1      | 0.151596944 | 0.001459824 |
| RP11-701H24.7 | HBA2       | 0.197751598 | 3.12E-05    |
| RP11-701H24.7 | GLT8D2     | 0.283588593 | 1.72E-09    |
| RP11-701H24.7 | OGDHL      | 0.203356434 | 1.83E-05    |
| RP11-701H24.7 | LIFR       | 0.548620208 | 0           |
| RP11-701H24.7 | CSGALNACT1 | 0.502751924 | 0           |
| RP11-701H24.7 | RAP1GAP    | 0.349038912 | 6.84E-14    |
| RP11-701H24.7 | COL9A3     | 0.264754608 | 2.02E-08    |
| RP11-701H24.7 | FBLN1      | 0.056917964 | 0.233895204 |
| RP11-701H24.7 | EFEMP1     | 0.373160585 | 5.07E-16    |
| RP11-701H24.7 | AOX1       | 0.284427002 | 1.29E-09    |
| RP11-701H24.7 | GRIN2C     | 0.324104228 | 4.50E-12    |
| RP11-701H24.7 | C11orf74   | 0.244469487 | 2.34E-07    |
| RP11-701H24.7 | PPARGC1A   | 0.348175123 | 7.98E-14    |
| RP11-701H24.7 | ANGPTL1    | 0.501635524 | 0           |
| RP11-701H24.7 | SCARA5     | 0.213968275 | 6.10E-06    |
| RP11-701H24.7 | LTF        | 0.214229952 | 6.25E-06    |
| RP11-701H24.7 | CA4        | 0.43765458  | 5.75E-22    |
| RP11-701H24.7 | TG         | 0.522853224 | 0           |
| RP11-701H24.7 | FCGBP      | 0.393552084 | 0           |
| RP11-701H24.7 | PBX4       | 0.347210915 | 9.47E-14    |
| RP11-701H24.7 | CYR61      | 0.415908453 | 0           |
| RP11-701H24.7 | FOS        | 0.421694415 | 0           |
| RP11-701H24.7 | KHDRBS2    | 0.415287206 | 0           |
| RP11-701H24.7 | MUM1L1     | 0.322247721 | 6.03E-12    |
| RP11-701H24.7 | RGS16      | 0.273847644 | 6.28E-09    |
| RP11-701H24.7 | MT1M       | 0.206473163 | 1.35E-05    |
| RP11-701H24.7 | LRP2       | 0.537795057 | 0           |
| RP11-701H24.7 | MAFB       | 0.2654489   | 1.85E-08    |
| RP11-701H24.7 | KCNK2      | 0.44901097  | 0           |
| RP11-701H24.7 | TBC1D4     | 0.488808199 | 0           |
| RP11-701H24.7 | MIOX       | 0.306505938 | 5.30E-11    |
| RP11-701H24.7 | TPPP       | 0.464969916 | 0           |
| RP11-701H24.7 | FMOD       | 0.268629456 | 1.23E-08    |
| RP11-701H24.7 | CITED2     | 0.471468043 | 0           |
| RP11-701H24.7 | RGS8       | 0.394632285 | 8.24E-18    |
| RP11-701H24.7 | ABI3BP     | 0.359305934 | 1.01E-14    |
| RP11-701H24.7 | ADH1B      | 0.268751686 | 1.06E-08    |
| RP11-701H24.7 | OGN        | 0.197169334 | 3.18E-05    |
| RP11-701H24.7 | NR4A1      | 0.433679652 | 0           |

|               |          |              |             |
|---------------|----------|--------------|-------------|
| RP11-701H24.7 | FOXJ1    | 0.394226512  | 8.96E-18    |
| RP11-701H24.7 | ALDH1A1  | 0.36484439   | 3.34E-15    |
| RP11-701H24.7 | OCA2     | 0.414272673  | 1.24E-19    |
| RP11-701H24.7 | TMEM139  | 0.253143395  | 8.42E-08    |
| RP11-701H24.7 | ARHGAP24 | 0.277078127  | 4.11E-09    |
| RP11-701H24.7 | SLC25A15 | 0.438633456  | 0           |
| RP11-701H24.7 | DES      | 0.204445467  | 1.58E-05    |
| RP11-701H24.7 | GDF10    | 0.265166284  | 1.69E-08    |
| RP11-701H24.7 | KIAA1324 | 0.27379247   | 6.33E-09    |
| RP11-701H24.7 | JUN      | 0.433358817  | 0           |
| RP11-701H24.7 | C7       | 0.0956456    | 0.045220984 |
| RP11-701H24.7 | LGI3     | 0.23447238   | 7.29E-07    |
| RP11-701H24.7 | CDON     | 0.500976265  | 0           |
| RP11-701H24.7 | BCL2     | 0.499140609  | 0           |
| RP11-701H24.7 | HLF      | 0.446449107  | 0           |
| RP11-701H24.7 | EGR1     | 0.494158863  | 0           |
| RP11-701H24.7 | IP6K3    | 0.278249134  | 3.52E-09    |
| RP11-701H24.7 | SCUBE3   | 0.370623261  | 9.40E-16    |
| RP11-701H24.7 | PKNOX2   | 0.415068635  | 0           |
| RP11-701H24.7 | SMAD9    | 0.551747008  | 0           |
| RP11-701H24.7 | IQGAP2   | 0.413446727  | 0           |
| RP11-701H24.7 | GNA14    | 0.408158614  | 0           |
| RP11-701H24.7 | LAYN     | 0.354858631  | 2.36E-14    |
| RP11-701H24.7 | AVPR1A   | 0.45255704   | 0           |
| RP11-701H24.7 | PDLIM3   | 0.206809317  | 1.31E-05    |
| RP11-701H24.7 | GPM6A    | 0.457086467  | 0           |
| RP11-701H24.7 | SDPR     | 0.530217692  | 0           |
| RP11-701H24.7 | CRYAB    | 0.154021934  | 0.001221002 |
| RP11-701H24.7 | FOXA2    | 0.352381152  | 2.79E-14    |
| RP11-701H24.7 | C8orf88  | 0.475309134  | 0           |
| RP11-701H24.7 | ISM1     | 0.311023582  | 3.39E-11    |
| RP11-701H24.7 | BMP2     | 0.393192385  | 0           |
| RP11-701H24.7 | ID4      | 0.508662419  | 0           |
| RP11-701H24.7 | NUPR1    | -0.035593319 | 0.456803487 |
| RP11-701H24.7 | SERTM1   | 0.264392904  | 1.86E-08    |
| RP11-701H24.7 | IRS1     | 0.513390844  | 0           |
| RP11-701H24.7 | FIBIN    | 0.123762542  | 0.009476563 |
| RP11-701H24.7 | PODN     | 0.120258314  | 0.011719034 |
| RP11-701H24.7 | TDRD9    | 0.265494997  | 1.84E-08    |
| RP11-701H24.7 | EPHA3    | 0.329312771  | 1.95E-12    |
| RP11-701H24.7 | AIF1L    | 0.484957179  | 0           |
| RP11-701H24.7 | EBF4     | 0.309165232  | 4.49E-11    |
| RP11-701H24.7 | ADM2     | 0.225835208  | 1.87E-06    |
| RP11-701H24.7 | GSTM3    | 0.331129421  | 1.45E-12    |
| RP11-701H24.7 | HSD17B6  | 0.379281992  | 7.88E-17    |
| RP11-701H24.7 | AGR3     | 0.367699854  | 1.68E-15    |
| RP11-701H24.7 | EPHB1    | 0.38853956   | 0           |
| RP11-701H24.7 | TMOD1    | 0.233477534  | 8.14E-07    |
| RP11-701H24.7 | WASF3    | 0.57581989   | 0           |
| RP11-701H24.7 | SELV     | 0.26146249   | 2.70E-08    |
| RP11-701H24.7 | ENPP1    | 0.245104066  | 2.18E-07    |

|               |          |              |             |
|---------------|----------|--------------|-------------|
| RP11-701H24.7 | SYNE1    | 0.510160379  | 1.84E-30    |
| RP11-701H24.7 | PLCH1    | 0.39566106   | 0           |
| RP11-701H24.7 | CCDC146  | 0.489458664  | 0           |
| RP11-701H24.7 | SLC16A2  | 0.414164849  | 0           |
| RP11-701H24.7 | IER2     | 0.321409606  | 6.88E-12    |
| RP11-701H24.7 | KCNAB1   | 0.425478204  | 0           |
| RP11-701H24.7 | SYNDIG1  | 0.274719233  | 5.61E-09    |
| RP11-701H24.7 | C16orf89 | 0.231888817  | 9.69E-07    |
| RP11-701H24.7 | CTGF     | 0.415940792  | 0           |
| RP11-701H24.7 | NR4A3    | 0.321424215  | 6.86E-12    |
| RP11-701H24.7 | KIAA1456 | 0.471082813  | 0           |
| RP11-701H24.7 | AQP4     | 0.356062261  | 1.89E-14    |
| RP11-701H24.7 | RNF150   | 0.48938732   | 0           |
| RP11-701H24.7 | C1S      | -0.06924432  | 0.147447154 |
| RP11-701H24.7 | PFKFB2   | 0.429473047  | 0           |
| RP11-701H24.7 | PROX1    | 0.51258067   | 0           |
| RP11-701H24.7 | TCF7L1   | 0.370096194  | 1.06E-15    |
| RP11-701H24.7 | HSPB6    | 0.220560427  | 3.26E-06    |
| RP11-701H24.7 | FHDC1    | 0.41487063   | 0           |
| RP11-701H24.7 | PRR15L   | 0.140920863  | 0.003110149 |
| RP11-701H24.7 | SLC1A1   | 0.224313721  | 2.20E-06    |
| RP11-701H24.7 | BTBD11   | 0.448243631  | 0           |
| RP11-701H24.7 | TRIM58   | 0.463108588  | 0           |
| RP11-701H24.7 | LRIG1    | 0.39676583   | 0           |
| RP11-701H24.7 | ROR2     | 0.263319074  | 2.42E-08    |
| RP11-701H24.7 | GPR125   | 0.531789247  | 0           |
| RP11-701H24.7 | FLRT1    | 0.388080007  | 0           |
| RP11-701H24.7 | PGF      | 0.301742611  | 1.34E-10    |
| RP11-701H24.7 | DUSP1    | 0.433120672  | 0           |
| RP11-701H24.7 | PLA2G7   | 0.360004198  | 8.85E-15    |
| RP11-701H24.7 | PLSCR4   | 0.485113626  | 0           |
| RP11-701H24.7 | FAM46B   | 0.172126451  | 0.000296638 |
| RP11-701H24.7 | GLDC     | 0.264936017  | 1.97E-08    |
| RP11-701H24.7 | ZBTB16   | 0.519031706  | 0           |
| RP11-701H24.7 | OMD      | 0.14287118   | 0.002696652 |
| RP11-701H24.7 | HSD11B2  | 0.316095394  | 1.57E-11    |
| RP11-701H24.7 | FGL2     | 0.110919615  | 0.020136233 |
| RP11-701H24.7 | CLCNKA   | 0.289189255  | 6.64E-10    |
| RP11-701H24.7 | GATM     | 0.36350871   | 4.39E-15    |
| RP11-701H24.7 | TNS3     | 0.470219309  | 0           |
| RP11-701H24.7 | TOB1     | 0.417674041  | 0           |
| RP11-701H24.7 | MARC2    | 0.404266603  | 0           |
| RP11-701H24.7 | LRRC2    | 0.447614441  | 0           |
| RP11-701H24.7 | SORD     | 0.430870142  | 0           |
| RP11-701H24.7 | RIMS4    | 0.439859212  | 0           |
| RP11-701H24.7 | SLC29A4  | 0.331126017  | 1.45E-12    |
| RP11-701H24.7 | SLC39A14 | 0.442250303  | 0           |
| RP11-701H24.7 | FAXDC2   | 0.397366652  | 0           |
| RP11-701H24.7 | HSPB8    | 0.104984582  | 0.02788373  |
| RP11-701H24.7 | CCL19    | -0.129521473 | 0.006577826 |
| RP11-701H24.7 | KCNIP3   | 0.346569953  | 1.06E-13    |

|               |          |              |             |
|---------------|----------|--------------|-------------|
| RP11-701H24.7 | CGNL1    | 0.454296956  | 0           |
| RP11-701H24.7 | ATF3     | 0.320456035  | 7.98E-12    |
| RP11-701H24.7 | SGCD     | 0.261017625  | 3.22E-08    |
| RP11-701H24.7 | STARD13  | 0.603466925  | 0           |
| RP11-701H24.7 | LDHD     | 0.186757944  | 8.50E-05    |
| RP11-701H24.7 | RCAN1    | 0.39905962   | 0           |
| RP11-701H24.7 | ID3      | 0.197708621  | 3.13E-05    |
| RP11-701H24.7 | SYTL3    | 0.36517246   | 3.12E-15    |
| RP11-701H24.7 | MT1E     | 0.04703064   | 0.325406479 |
| RP11-701H24.7 | CAMK1D   | 0.419901877  | 0           |
| RP11-701H24.7 | PRKCQ    | 0.401414258  | 0           |
| RP11-701H24.7 | NUAK2    | 0.209890303  | 9.66E-06    |
| RP11-701H24.7 | LIPG     | 0.525796203  | 0           |
| RP11-701H24.7 | SLC25A25 | 0.442334696  | 0           |
| RP11-701H24.7 | PRKX     | 0.494164962  | 0           |
| RP11-701H24.7 | SRPX     | 0.171922631  | 0.000301643 |
| RP11-701H24.7 | FAM189A1 | 0.418934548  | 0           |
| RP11-701H24.7 | PLEKHH1  | 0.578463308  | 0           |
| RP11-701H24.7 | WNT11    | 0.280628877  | 2.56E-09    |
| RP11-701H24.7 | SNAI1    | 0.310700477  | 3.56E-11    |
| RP11-701H24.7 | FDCSP    | -0.049345668 | 0.302265488 |
| RP11-701H24.7 | MT1X     | 0.078375369  | 0.10099414  |
| RP11-701H24.7 | ACACB    | 0.52222985   | 0           |
| RP11-701H24.7 | ARC      | 0.339712837  | 3.47E-13    |
| RP11-701H24.7 | KLK4     | 0.096096966  | 0.044180549 |
| RP11-701H24.7 | ZFPM2    | 0.479818136  | 0           |
| RP11-701H24.7 | AKAP12   | 0.554213839  | 0           |
| RP11-701H24.7 | GJB6     | 0.362725253  | 4.26E-15    |
| RP11-701H24.7 | ERO1LB   | 0.544815427  | 0           |
| RP11-701H24.7 | DNALI1   | 0.353292465  | 3.16E-14    |
| RP11-701H24.7 | HKDC1    | 0.178286012  | 0.000177343 |
| RP11-701H24.7 | ZFP36L2  | 0.454611125  | 0           |
| RP11-701H24.7 | CAPSL    | 0.258288431  | 4.03E-08    |
| RP11-701H24.7 | CYP7B1   | 0.587940582  | 0           |
| RP11-701H24.7 | CPQ      | 0.467710068  | 0           |
| RP11-701H24.7 | RPS6KA6  | 0.595563639  | 1.73E-43    |
| RP11-701H24.7 | TLE1     | 0.289698511  | 7.43E-10    |
| RP11-701H24.7 | TP53INP2 | 0.479985788  | 0           |
| RP11-701H24.7 | KATNAL2  | 0.431181617  | 0           |
| RP11-701H24.7 | SGPP2    | 0.235543676  | 6.47E-07    |
| RP11-701H24.7 | CTH      | 0.361263145  | 6.90E-15    |
| RP11-701H24.7 | KIF12    | 0.301591838  | 1.37E-10    |
| RP11-701H24.7 | TMEM220  | 0.392859919  | 0           |
| RP11-701H24.7 | CENPJ    | 0.458195208  | 0           |
| RP11-701H24.7 | FAM155B  | 0.28077653   | 2.51E-09    |
| RP11-701H24.7 | WFS1     | 0.27950184   | 2.98E-09    |
| RP11-701H24.7 | SELENBP1 | 0.223559857  | 2.38E-06    |
| RP11-701H24.7 | SNTA1    | 0.124151885  | 0.00925264  |
| RP11-701H24.7 | FRAS1    | 0.457833381  | 0           |
| RP11-701H24.7 | FBLN7    | 0.232530346  | 9.03E-07    |
| RP11-701H24.7 | AGPAT9   | 0.508754755  | 0           |

|               |          |              |             |
|---------------|----------|--------------|-------------|
| RP11-701H24.7 | GPR83    | 0.399442722  | 0           |
| RP11-701H24.7 | PRTG     | 0.596704698  | 0           |
| RP11-701H24.7 | EGR3     | 0.390658181  | 0           |
| RP11-701H24.7 | GRAMD2   | 0.38172542   | 2.23E-17    |
| RP11-701H24.7 | HYOU1    | 0.407162208  | 0           |
| RP11-701H24.7 | FBLN5    | 0.262351603  | 2.73E-08    |
| RP11-701H24.7 | ITM2A    | 0.466875782  | 0           |
| RP11-701H24.7 | SRF      | 0.400063118  | 0           |
| RP11-701H24.7 | FGFR2    | 0.623111084  | 0           |
| RP11-701H24.7 | MT1A     | 0.072608416  | 0.128766702 |
| RP11-701H24.7 | MAMDC2   | 0.393055938  | 0           |
| RP11-701H24.7 | FHL2     | 0.126539997  | 0.007979331 |
| RP11-701H24.7 | FTCDNL1  | 0.286832692  | 1.10E-09    |
| RP11-701H24.7 | PKIA     | 0.49338117   | 0           |
| RP11-701H24.7 | DNAJB4   | 0.677594414  | 0           |
| RP11-701H24.7 | SLC25A33 | 0.278807831  | 3.27E-09    |
| RP11-701H24.7 | EYA2     | 0.185684095  | 9.35E-05    |
| RP11-701H24.7 | LPAR1    | 0.226443689  | 1.75E-06    |
| RP11-701H24.7 | STX11    | 0.149961988  | 0.001644315 |
| RP11-701H24.7 | ARHGEF28 | 0.346115648  | 1.15E-13    |
| RP11-701H24.7 | OR2W3    | 0.292535537  | 5.00E-10    |
| RP11-701H24.7 | ALDH1B1  | 0.169728913  | 0.000354229 |
| RP11-701H24.7 | CXCL12   | 0.115094166  | 0.01587857  |
| RP11-701H24.7 | OLFM2    | 0.263080646  | 2.49E-08    |
| RP11-701H24.7 | TUB      | 0.603360973  | 0           |
| RP11-701H24.7 | HTRA3    | 0.166802027  | 0.000456503 |
| RP11-701H24.7 | CKB      | 0.008703694  | 0.855646426 |
| RP11-701H24.7 | RGS2     | 0.069270276  | 0.147295206 |
| RP11-701H24.7 | SHANK2   | 0.626546237  | 0           |
| RP11-701H24.7 | CNTFR    | 0.281020479  | 2.07E-09    |
| RP11-701H24.7 | CYTH3    | 0.438054051  | 0           |
| RP11-701H24.7 | PLAC9    | 0.143943129  | 0.00252317  |
| RP11-701H24.7 | WWOX     | 0.405466403  | 0           |
| RP11-701H24.7 | NPR3     | 0.475421469  | 0           |
| RP11-701H24.7 | SDC2     | 0.596114797  | 0           |
| RP11-701H24.7 | KLF15    | 0.357342057  | 1.48E-14    |
| RP11-701H24.7 | TMEM164  | 0.408954036  | 0           |
| RP11-701H24.7 | LONRF3   | 0.623414332  | 0           |
| RP11-701H24.7 | GBP1     | 0.058290097  | 0.222799303 |
| RP11-701H24.7 | ARHGAP6  | 0.47365432   | 0           |
| RP11-701H24.7 | TMEM119  | 0.055629232  | 0.244667241 |
| RP11-701H24.7 | SH3RF1   | 0.62055291   | 0           |
| RP11-701H24.7 | CRELD2   | 0.126500566  | 0.007999015 |
| RP11-701H24.7 | PCP4     | 0.04023196   | 0.400262041 |
| RP11-701H24.7 | GCSH     | 0.32843948   | 2.25E-12    |
| RP11-701H24.7 | IMPA2    | 0.392734677  | 0           |
| RP11-701H24.7 | C1R      | -0.173443125 | 0.000266126 |
| RP11-701H24.7 | SUCNR1   | 0.312450747  | 2.74E-11    |
| RP11-701H24.7 | SFRP1    | 0.306866477  | 6.32E-11    |
| RP11-701H24.7 | UGT8     | 0.276956714  | 4.18E-09    |
| RP11-701H24.7 | TLE4     | 0.369192975  | 1.30E-15    |

|               |          |              |             |
|---------------|----------|--------------|-------------|
| RP11-701H24.7 | ANTXR1   | 0.426151221  | 0           |
| RP11-701H24.7 | GPX3     | 0.230834683  | 1.09E-06    |
| RP11-701H24.7 | DPY19L2  | 0.434400327  | 0           |
| RP11-701H24.7 | FAM46C   | 0.26578321   | 1.77E-08    |
| RP11-701H24.7 | IL33     | 0.261278898  | 2.77E-08    |
| RP11-701H24.7 | PEG3     | 0.649999858  | 0           |
| RP11-701H24.7 | FAHD2A   | 0.219198223  | 3.76E-06    |
| RP11-701H24.7 | PTGDS    | -0.04568886  | 0.339411228 |
| RP11-701H24.7 | CHCHD10  | -0.077967587 | 0.102784838 |
| RP11-701H24.7 | CD36     | 0.361405975  | 6.71E-15    |
| RP11-701H24.7 | ANKRD37  | 0.316530834  | 1.47E-11    |
| RP11-701H24.7 | TSPAN33  | 0.094492464  | 0.047887418 |
| RP11-701H24.7 | PRDM16   | 0.600146234  | 0           |
| RP11-701H24.7 | UST      | 0.437728819  | 0           |
| RP11-701H24.7 | NEXN     | 0.404338656  | 0           |
| RP11-701H24.7 | NUPR1L   | 0.110972489  | 0.020035092 |
| RP11-701H24.7 | SLC24A3  | 0.214822406  | 5.89E-06    |
| RP11-701H24.7 | MARC1    | 0.45029644   | 0           |
| RP11-701H24.7 | MYH11    | 0.345494969  | 1.28E-13    |
| RP11-701H24.7 | APOA1    | 0.219608708  | 3.40E-06    |
| RP11-701H24.7 | TMEM178B | 0.440464148  | 0           |
| RP11-701H24.7 | CAPN6    | 0.283216329  | 1.53E-09    |
| RP11-701H24.7 | PPM1L    | 0.5448967    | 0           |
| RP11-701H24.7 | FZD8     | 0.364778436  | 3.38E-15    |
| RP11-701H24.7 | RCAN2    | 0.358519589  | 1.18E-14    |
| RP11-701H24.7 | COPZ2    | 0.115295149  | 0.01569518  |
| RP11-701H24.7 | GAS1     | 0.174063237  | 0.000252796 |
| RP11-701H24.7 | DACT1    | 0.333575969  | 9.71E-13    |
| RP11-701H24.7 | WBSCR17  | 0.421032177  | 0           |
| RP11-701H24.7 | NCS1     | 0.364116482  | 3.88E-15    |
| RP11-701H24.7 | SPIRE2   | 0.234452665  | 7.30E-07    |
| RP11-701H24.7 | C15orf52 | 0.190143738  | 6.28E-05    |
| RP11-701H24.7 | SPAG5    | 0.180017843  | 0.000152994 |
| RP11-701H24.7 | ARL4D    | 0.027334143  | 0.567731208 |
| RP11-701H24.7 | FAM189A2 | 0.503084958  | 0           |
| RP11-701H24.7 | MAP1LC3A | 0.153079568  | 0.001309174 |
| RP11-701H24.7 | KLF6     | 0.365892992  | 2.68E-15    |
| RP11-701H24.7 | ADD3     | 0.607544459  | 0           |
| RP11-701H24.7 | TSPAN7   | 0.350938678  | 4.86E-14    |
| RP11-701H24.7 | KLF9     | 0.495445893  | 0           |
| RP11-701H24.7 | KCNQ1    | 0.259066513  | 4.10E-08    |
| RP11-701H24.7 | MAN1A1   | 0.269607991  | 1.09E-08    |
| RP11-701H24.7 | MLF1     | 0.414957435  | 0           |
| RP11-701H24.7 | RARB     | 0.480637813  | 0           |
| RP11-701H24.7 | CDC42EP2 | 0.084563156  | 0.076747643 |
| RP11-701H24.7 | FAM3B    | 0.153948178  | 0.0012277   |
| RP11-701H24.7 | GADD45B  | 0.132481838  | 0.005463746 |
| RP11-701H24.7 | TMEM47   | 0.49761047   | 0           |
| RP11-701H24.7 | SDF2L1   | 0.064519158  | 0.177146354 |
| RP11-701H24.7 | CCDC85A  | 0.5732837    | 0           |
| RP11-701H24.7 | CRYBG3   | 0.600996973  | 0           |

|               |          |              |             |
|---------------|----------|--------------|-------------|
| RP11-701H24.7 | FBLN2    | 0.082218588  | 0.085309367 |
| RP11-701H24.7 | PEBP4    | -0.047449627 | 0.321111254 |
| RP11-701H24.7 | CDADC1   | 0.452996735  | 0           |
| RP11-701H24.7 | FAM63A   | 0.393320606  | 0           |
| RP11-701H24.7 | GLUL     | 0.351759773  | 4.18E-14    |
| RP11-701H24.7 | FREM2    | 0.398830411  | 0           |
| RP11-701H24.7 | ACKR3    | 0.398767435  | 0           |
| RP11-701H24.7 | DENND6A  | 0.606083111  | 0           |
| RP11-701H24.7 | CLDN8    | 0.229213485  | 1.30E-06    |
| RP11-701H24.7 | UTS2R    | 0.384628666  | 6.29E-17    |
| RP11-701H24.7 | SCNN1B   | 0.271166355  | 8.90E-09    |
| RP11-701H24.7 | TTC30A   | 0.475734645  | 0           |
| RP11-701H24.7 | CORO2B   | 0.424132453  | 0           |
| RP11-701H24.7 | TC2N     | 0.327120962  | 2.78E-12    |
| RP11-701H24.7 | ALDH2    | 0.077902626  | 0.103072416 |
| RP11-701H24.7 | GPR183   | 0.064110525  | 0.179909875 |
| RP11-701H24.7 | C4orf47  | 0.338600975  | 4.19E-13    |
| RP11-701H24.7 | SLC25A42 | 0.360620055  | 7.84E-15    |
| RP11-701H24.7 | LGMN     | 0.230592567  | 1.12E-06    |
| RP11-701H24.7 | ACSF2    | 0.126809487  | 0.007845953 |
| RP11-701H24.7 | KIAA1467 | 0.463825149  | 0           |
| RP11-701H24.7 | PRKG1    | 0.491994712  | 0           |
| RP11-701H24.7 | GNAI1    | 0.395402633  | 0           |
| RP11-701H24.7 | ABCC4    | 0.312026512  | 2.92E-11    |
| RP11-701H24.7 | PRPS1    | 0.312767186  | 2.61E-11    |
| RP11-701H24.7 | TSPAN5   | 0.258774612  | 4.25E-08    |
| RP11-701H24.7 | CR2      | 0.061321449  | 0.199712559 |
| RP11-701H24.7 | CCDC170  | 0.443690659  | 0           |
| RP11-701H24.7 | RRAD     | -0.072641887 | 0.12855488  |
| RP11-701H24.7 | SCGB2A1  | 0.045003645  | 0.346709663 |
| RP11-701H24.7 | SESN3    | 0.430266767  | 0           |
| RP11-701H24.7 | SGK223   | 0.284593367  | 1.50E-09    |
| RP11-701H24.7 | NDRG2    | 0.272456222  | 7.53E-09    |
| RP11-701H24.7 | C3orf52  | 0.275735355  | 4.91E-09    |
| RP11-701H24.7 | FLRT3    | 0.040743992  | 0.394288795 |
| RP11-701H24.7 | MST1R    | -0.237403586 | 5.25E-07    |
| RP11-701H24.7 | SDC1     | -0.437465995 | 0           |
| RP11-701H24.7 | ST8SIA4  | -0.295906864 | 3.10E-10    |
| RP11-701H24.7 | UBTD1    | -0.474982767 | 0           |
| RP11-701H24.7 | EPHA2    | -0.000826769 | 0.986214053 |
| RP11-701H24.7 | TMEM130  | 0.0343087    | 0.473218689 |
| RP11-701H24.7 | SPINK2   | -0.476116471 | 0           |
| RP11-701H24.7 | MMP16    | -0.142192008 | 0.002849595 |
| RP11-701H24.7 | SIGLEC15 | -0.177845891 | 0.000184087 |
| RP11-701H24.7 | RIN1     | -0.40118434  | 0           |
| RP11-701H24.7 | IL1RN    | -0.387573223 | 0           |
| RP11-701H24.7 | FCER1G   | -0.477087772 | 0           |
| RP11-701H24.7 | CD276    | -0.336861343 | 5.62E-13    |
| RP11-701H24.7 | CTSB     | -0.379631479 | 6.84E-17    |
| RP11-701H24.7 | FAM171A2 | -0.034137219 | 0.475434147 |
| RP11-701H24.7 | ASPHD1   | -0.473417452 | 0           |



|               |          |              |             |
|---------------|----------|--------------|-------------|
| RP11-701H24.7 | C15orf48 | -0.500896411 | 0           |
| RP11-701H24.7 | DYSF     | -0.082818134 | 0.083049901 |
| RP11-701H24.7 | PDZRN4   | 0.147817552  | 0.001918739 |
| RP11-701H24.7 | EFHD2    | -0.215251605 | 5.63E-06    |
| RP11-701H24.7 | ASF1B    | -0.469591254 | 0           |
| RP11-701H24.7 | AQP1     | -0.126978415 | 0.007763365 |
| RP11-701H24.7 | ARRDC2   | -0.21888377  | 3.88E-06    |
| RP11-701H24.7 | PRSS1    | -0.195487094 | 3.72E-05    |
| RP11-701H24.7 | MAPK13   | -0.279404539 | 3.02E-09    |
| RP11-701H24.7 | CST5     | -0.345450244 | 9.49E-14    |
| RP11-701H24.7 | AHR      | -0.00254782  | 0.957531839 |
| RP11-701H24.7 | BAX      | -0.628488697 | 0           |
| RP11-701H24.7 | C1orf115 | 0.031115946  | 0.515383    |
| RP11-701H24.7 | PLK3     | -0.170003291 | 0.000352805 |
| RP11-701H24.7 | JAG2     | -0.192221794 | 5.20E-05    |
| RP11-701H24.7 | RAD23B   | -0.043210824 | 0.366272818 |
| RP11-701H24.7 | CA12     | 0.041715861  | 0.383100205 |
| RP11-701H24.7 | ADTRP    | -0.06144498  | 0.198724472 |
| RP11-701H24.7 | UCP2     | -0.229686653 | 1.23E-06    |
| RP11-701H24.7 | IGFBP2   | -0.169394242 | 0.000370661 |
| RP11-701H24.7 | LOXL2    | -0.240067855 | 3.89E-07    |
| RP11-701H24.7 | GPX1     | -0.630325204 | 0           |
| RP11-701H24.7 | P3H3     | -0.46876718  | 0           |
| RP11-701H24.7 | C2orf81  | -0.219135673 | 3.78E-06    |
| RP11-701H24.7 | CDT1     | -0.49573822  | 0           |
| RP11-701H24.7 | SNX25    | 0.032241282  | 0.500302983 |
| RP11-701H24.7 | MTHFD1L  | -0.267762548 | 1.38E-08    |
| RP11-701H24.7 | CDC42BPG | -0.153188079 | 0.001284063 |
| RP11-701H24.7 | MSN      | -0.092644752 | 0.052434071 |
| RP11-701H24.7 | SIGLEC6  | -0.163302867 | 0.000592761 |
| RP11-701H24.7 | F2R      | 0.005844966  | 0.902767428 |
| RP11-701H24.7 | TMEM184A | -0.351769418 | 4.18E-14    |
| RP11-701H24.7 | CKS2     | -0.443387269 | 0           |
| RP11-701H24.7 | TAX1BP3  | -0.550526216 | 0           |
| RP11-701H24.7 | PMEPA1   | -0.296802707 | 2.73E-10    |
| RP11-701H24.7 | CXCL16   | -0.486340375 | 0           |
| RP11-701H24.7 | FAXC     | -0.249499882 | 1.30E-07    |
| RP11-701H24.7 | VTCN1    | -0.357154567 | 1.18E-14    |
| RP11-701H24.7 | SH2D4A   | -0.157566444 | 0.000936096 |
| RP11-701H24.7 | RNF24    | 0.013006607  | 0.78572889  |
| RP11-701H24.7 | LY6G6C   | -0.281296817 | 1.99E-09    |
| RP11-701H24.7 | NID1     | -0.060287163 | 0.207329335 |
| RP11-701H24.7 | STAC     | -0.350751595 | 5.02E-14    |
| RP11-701H24.7 | RAB34    | -0.382810616 | 7.13E-18    |
| RP11-701H24.7 | HES4     | -0.317441996 | 1.28E-11    |
| RP11-701H24.7 | EPHA10   | -0.292915944 | 4.74E-10    |
| RP11-701H24.7 | ENTPD2   | -0.169734651 | 0.000360579 |
| RP11-701H24.7 | DDB2     | -0.483507888 | 0           |
| RP11-701H24.7 | NKAIN4   | -0.263812667 | 2.27E-08    |
| RP11-701H24.7 | TRIM29   | -0.147720252 | 0.001932133 |
| RP11-701H24.7 | ADCY8    | -0.309748836 | 3.24E-11    |

|               |          |              |             |
|---------------|----------|--------------|-------------|
| RP11-701H24.7 | SFTA2    | -0.412164094 | 0           |
| RP11-701H24.7 | NRIP1    | 0.059906047  | 0.210219928 |
| RP11-701H24.7 | VWA1     | -0.232303265 | 9.26E-07    |
| RP11-701H24.7 | APLNR    | -0.158663696 | 0.000861225 |
| RP11-701H24.7 | REN      | -0.344980203 | 1.03E-13    |
| RP11-701H24.7 | EDIL3    | -0.100417001 | 0.035477    |
| RP11-701H24.7 | AGRN     | -0.049624557 | 0.299411325 |
| RP11-701H24.7 | TREM1    | -0.379603679 | 6.92E-17    |
| RP11-701H24.7 | SRL      | -0.164816449 | 0.000534401 |
| RP11-701H24.7 | RASGRF1  | -0.129025692 | 0.006822473 |
| RP11-701H24.7 | RMI2     | -0.430014865 | 0           |
| RP11-701H24.7 | SAMD1    | -0.523599429 | 0           |
| RP11-701H24.7 | MGAT4B   | -0.333216412 | 1.03E-12    |
| RP11-701H24.7 | NXN      | -0.303967468 | 9.69E-11    |
| RP11-701H24.7 | SH3BGRL3 | -0.664343989 | 0           |
| RP11-701H24.7 | CA11     | -0.320955869 | 7.38E-12    |
| RP11-701H24.7 | PLD3     | -0.324154012 | 4.46E-12    |
| RP11-701H24.7 | LURAP1L  | -0.341526224 | 2.55E-13    |
| RP11-701H24.7 | CARNS1   | -0.038533886 | 0.420456124 |
| RP11-701H24.7 | PDLIM7   | -0.37715869  | 1.66E-16    |
| RP11-701H24.7 | BCL2L1   | -0.476461561 | 0           |
| RP11-701H24.7 | GGT6     | -0.222124039 | 2.77E-06    |
| RP11-701H24.7 | DPYSL3   | -0.159187642 | 0.000827462 |
| RP11-701H24.7 | FYN      | -0.275560469 | 5.02E-09    |
| RP11-701H24.7 | TK1      | -0.55238102  | 0           |
| RP11-701H24.7 | AK1      | -0.467501425 | 0           |
| RP11-701H24.7 | HIGD1B   | -0.1533353   | 0.001284684 |
| RP11-701H24.7 | TMEM59L  | -0.149549242 | 0.001694156 |
| RP11-701H24.7 | MEGF9    | 0.043817178  | 0.359580808 |
| RP11-701H24.7 | ZFP36L1  | -0.048675099 | 0.308761385 |
| RP11-701H24.7 | ADRA1B   | -0.100070777 | 0.036118287 |
| RP11-701H24.7 | EPHA4    | -0.021042531 | 0.660045938 |
| RP11-701H24.7 | TCERG1L  | 0.070633473  | 0.139481694 |
| RP11-701H24.7 | NGFR     | -0.00401158  | 0.933179171 |
| RP11-701H24.7 | EBI3     | -0.513791533 | 0           |
| RP11-701H24.7 | S100A10  | -0.429511626 | 0           |
| RP11-701H24.7 | S100B    | -0.397017165 | 0           |
| RP11-701H24.7 | CD44     | -0.031225019 | 0.513911143 |
| RP11-701H24.7 | BHLHE41  | 0.046268549  | 0.333314119 |
| RP11-701H24.7 | FBX02    | -0.328092688 | 2.38E-12    |
| RP11-701H24.7 | SLC30A2  | -0.315318836 | 1.77E-11    |
| RP11-701H24.7 | FRMD5    | -0.454311423 | 0           |
| RP11-701H24.7 | SAMD11   | -0.059913848 | 0.210160471 |
| RP11-701H24.7 | SIPA1L2  | 0.079263411  | 0.097180255 |
| RP11-701H24.7 | S100A16  | -0.537834346 | 0           |
| RP11-701H24.7 | PPL      | -0.120365543 | 0.011643995 |
| RP11-701H24.7 | ARHGD1B  | -0.277062808 | 4.12E-09    |
| RP11-701H24.7 | CDC42EP3 | -0.367545679 | 1.88E-15    |
| RP11-701H24.7 | RUNX2    | -0.119121631 | 0.012541177 |
| RP11-701H24.7 | LAMC2    | -0.274753132 | 5.58E-09    |
| RP11-701H24.7 | BRINP1   | -0.208522426 | 1.11E-05    |

|               |          |              |             |
|---------------|----------|--------------|-------------|
| RP11-701H24.7 | GPRC5B   | -0.098457947 | 0.039237032 |
| RP11-701H24.7 | AQP5     | -0.00691995  | 0.884998956 |
| RP11-701H24.7 | PLAG1    | 0.055782558  | 0.243367744 |
| RP11-701H24.7 | PTPRU    | -0.157963729 | 0.000908319 |
| RP11-701H24.7 | ANGPTL4  | -0.291138158 | 6.08E-10    |
| RP11-701H24.7 | PALM3    | -0.108442997 | 0.023106031 |
| RP11-701H24.7 | ACP5     | -0.454184195 | 0           |
| RP11-701H24.7 | DLG4     | -0.12455144  | 0.009027752 |
| RP11-701H24.7 | ETNK2    | -0.189807442 | 6.47E-05    |
| RP11-701H24.7 | CD109    | -0.00255704  | 0.957378307 |
| RP11-701H24.7 | SNX22    | -0.079430354 | 0.096476278 |
| RP11-701H24.7 | TMEM98   | -0.134746268 | 0.004710999 |
| RP11-701H24.7 | CTHRC1   | -0.326253627 | 3.19E-12    |
| RP11-701H24.7 | S100A2   | -0.37830984  | 1.13E-16    |
| RP11-701H24.7 | C11orf80 | -0.449849085 | 0           |
| RP11-701H24.7 | SREBF1   | -0.311947934 | 2.95E-11    |
| RP11-701H24.7 | PRSS22   | -0.365031899 | 3.21E-15    |
| RP11-701H24.7 | CMTM3    | -0.517130947 | 0           |
| RP11-701H24.7 | RDH5     | -0.132522545 | 0.00544931  |
| RP11-701H24.7 | MYH10    | -0.051474113 | 0.281743532 |
| RP11-701H24.7 | EVPL     | -0.171920361 | 0.000301699 |
| RP11-701H24.7 | SCD      | -0.261526678 | 3.02E-08    |
| RP11-701H24.7 | CD151    | -0.346176496 | 1.14E-13    |
| RP11-701H24.7 | S100A4   | -0.368552722 | 1.51E-15    |
| RP11-701H24.7 | BNIP1    | -0.150325942 | 0.001601485 |
| RP11-701H24.7 | MAP3K6   | -0.350982506 | 4.82E-14    |
| RP11-701H24.7 | MANEAL   | -0.398652264 | 0           |
| RP11-701H24.7 | CD207    | -0.29781748  | 1.92E-10    |
| RP11-701H24.7 | CD1A     | -0.336803581 | 4.18E-13    |
| RP11-701H24.7 | C3       | -0.233133721 | 8.45E-07    |
| RP11-701H24.7 | NT5E     | -0.129216321 | 0.006740291 |
| RP11-701H24.7 | CACNG4   | -0.291383459 | 4.87E-10    |
| RP11-701H24.7 | FHOD1    | -0.280680506 | 2.54E-09    |
| RP11-701H24.7 | LEMD1    | -0.377438393 | 1.52E-16    |
| RP11-701H24.7 | ATP11A   | 0.024658102  | 0.606244172 |
| RP11-701H24.7 | PPAP2C   | -0.263957767 | 2.23E-08    |
| RP11-701H24.7 | DRAM1    | -0.252926242 | 8.64E-08    |
| RP11-701H24.7 | CDA      | -0.255102874 | 6.65E-08    |
| RP11-701H24.7 | CCND2    | -0.092522488 | 0.052747214 |
| RP11-701H24.7 | LCN6     | 0.014713404  | 0.758525414 |
| RP11-701H24.7 | CDH4     | -0.199919862 | 2.54E-05    |
| RP11-701H24.7 | MMP11    | -0.463315528 | 0           |
| RP11-701H24.7 | B3GAT1   | -0.038180712 | 0.424729946 |
| RP11-701H24.7 | SPP1     | -0.280904467 | 2.47E-09    |
| RP11-701H24.7 | HLA-DQB1 | -0.442132294 | 0           |
| RP11-701H24.7 | SDC3     | -0.200911729 | 2.31E-05    |
| RP11-701H24.7 | CX3CL1   | -0.315229195 | 1.79E-11    |
| RP11-701H24.7 | SDK1     | -0.066673664 | 0.163095423 |
| RP11-701H24.7 | DOCK9    | 0.107982026  | 0.023698814 |
| RP11-701H24.7 | CSF2     | -0.449978832 | 2.85E-23    |
| RP11-701H24.7 | GRHL3    | -0.340848101 | 2.86E-13    |

|               |          |              |             |
|---------------|----------|--------------|-------------|
| RP11-701H24.7 | TMEM92   | -0.419760981 | 3.64E-20    |
| RP11-701H24.7 | BASP1    | -0.350536144 | 5.22E-14    |
| RP11-701H24.7 | HRH1     | -0.239309735 | 4.23E-07    |
| RP11-701H24.7 | ESM1     | 0.000403527  | 0.993271749 |
| RP11-701H24.7 | B4GALNT3 | -0.124408752 | 0.009107498 |
| RP11-701H24.7 | LMO3     | -0.096076501 | 0.044257169 |
| RP11-701H24.7 | C9orf16  | -0.643586834 | 0           |
| RP11-701H24.7 | SEMA3F   | -0.071478397 | 0.134801005 |
| RP11-701H24.7 | PLA2G12B | -0.183776814 | 0.000107678 |
| RP11-701H24.7 | KLK6     | -0.144823756 | 0.002351723 |
| RP11-701H24.7 | ST3GAL5  | -0.095738645 | 0.045011385 |
| RP11-701H24.7 | FAM132B  | -0.072538771 | 0.129099225 |
| RP11-701H24.7 | CDKN1A   | -0.217514758 | 4.47E-06    |
| RP11-701H24.7 | E2F1     | -0.468250184 | 0           |
| RP11-701H24.7 | B3GNT8   | -0.38850098  | 0           |
| RP11-701H24.7 | MTMR11   | -0.330594553 | 1.58E-12    |
| RP11-701H24.7 | MYO1G    | -0.338741252 | 4.10E-13    |
| RP11-701H24.7 | TMSB10   | -0.593345427 | 0           |
| RP11-701H24.7 | UNC5CL   | -0.422007875 | 0           |
| RP11-701H24.7 | ABR      | -0.322982296 | 5.37E-12    |
| RP11-701H24.7 | PLP2     | -0.548320365 | 0           |
| RP11-701H24.7 | SRCIN1   | -0.311003725 | 3.41E-11    |
| RP11-701H24.7 | PDE9A    | -0.421746185 | 0           |
| RP11-701H24.7 | TREM2    | -0.462730875 | 0           |
| RP11-701H24.7 | KDELR3   | -0.344119574 | 1.63E-13    |
| RP11-701H24.7 | PC       | -0.139363066 | 0.003458919 |
| RP11-701H24.7 | C2CD4A   | -0.364715886 | 3.43E-15    |
| RP11-701H24.7 | PELI1    | -0.175880454 | 0.000217241 |
| RP11-701H24.7 | SSX1     | -0.188552183 | 7.24E-05    |
| RP11-701H24.7 | MROH6    | -0.335443681 | 7.12E-13    |
| RP11-701H24.7 | ESPN     | -0.192688012 | 4.98E-05    |
| RP11-701H24.7 | BMP1     | -0.234340613 | 7.39E-07    |
| RP11-701H24.7 | TM4SF4   | -0.186558086 | 8.42E-05    |
| RP11-701H24.7 | CORO2A   | -0.138593458 | 0.003644008 |
| RP11-701H24.7 | CD164L2  | -0.423468174 | 1.57E-20    |
| RP11-701H24.7 | CTSS     | -0.370606666 | 9.43E-16    |
| RP11-701H24.7 | CLU      | -0.214512917 | 6.07E-06    |
| RP11-701H24.7 | TMSB4X   | -0.44879793  | 0           |
| RP11-701H24.7 | WNT10A   | -0.219571688 | 3.41E-06    |
| RP11-701H24.7 | NAPSA    | -0.301197815 | 1.45E-10    |
| RP11-701H24.7 | PLEKHA4  | -0.104821611 | 0.028128432 |
| RP11-701H24.7 | SFTPA1   | -0.170295164 | 0.000338216 |
| RP11-701H24.7 | C1orf116 | -0.172097374 | 0.000297347 |
| RP11-701H24.7 | TM4SF1   | -0.239860347 | 3.98E-07    |
| RP11-701H24.7 | SEL1L3   | -0.090203877 | 0.058986906 |
| RP11-701H24.7 | VASN     | -0.344894998 | 1.42E-13    |
| RP11-701H24.7 | NPTXR    | -0.254873808 | 6.84E-08    |
| RP11-701H24.7 | PDE4C    | -0.339477954 | 3.62E-13    |
| RP11-701H24.7 | CDC42EP1 | -0.319485301 | 9.29E-12    |
| RP11-701H24.7 | ENDOD1   | -0.14046897  | 0.003207876 |
| RP11-701H24.7 | RYR1     | -0.223003855 | 2.52E-06    |

|               |          |              |             |
|---------------|----------|--------------|-------------|
| RP11-701H24.7 | IL1RAP   | 0.004785868  | 0.920321002 |
| RP11-701H24.7 | SLC35F2  | -0.13661526  | 0.004134632 |
| RP11-701H24.7 | ISYNA1   | -0.31284165  | 2.58E-11    |
| RP11-701H24.7 | HLA-G    | -0.355455623 | 2.11E-14    |
| RP11-701H24.7 | CDKN2B   | -0.318460954 | 1.09E-11    |
| RP11-701H24.7 | ALDH1A3  | -0.235565803 | 6.45E-07    |
| RP11-701H24.7 | CLIP3    | -0.237550246 | 5.17E-07    |
| RP11-701H24.7 | ULBP2    | -0.295178105 | 3.44E-10    |
| RP11-701H24.7 | ETHE1    | -0.5206695   | 0           |
| RP11-701H24.7 | XPR1     | -0.148780059 | 0.001790755 |
| RP11-701H24.7 | SPTBN2   | -0.275841023 | 4.84E-09    |
| RP11-701H24.7 | IVL      | -0.401970102 | 1.77E-18    |
| RP11-701H24.7 | MARCO    | -0.424625195 | 0           |
| RP11-701H24.7 | PLXND1   | -0.114471359 | 0.016458849 |
| RP11-701H24.7 | EMILIN2  | -0.358307401 | 1.23E-14    |
| RP11-701H24.7 | PLAUR    | -0.43363157  | 0           |
| RP11-701H24.7 | CDC42EP5 | -0.390767963 | 0           |
| RP11-701H24.7 | TRPC5    | 0.094074086  | 0.048858824 |
| RP11-701H24.7 | TMEM100  | -0.178690531 | 0.00017135  |
| RP11-701H24.7 | QSOX1    | -0.261563556 | 3.01E-08    |
| RP11-701H24.7 | ARHGAP23 | -0.058834893 | 0.218499647 |
| RP11-701H24.7 | MDFI     | -0.20854824  | 1.10E-05    |
| RP11-701H24.7 | FSTL3    | -0.221686046 | 2.90E-06    |
| RP11-701H24.7 | INF2     | -0.2327553   | 8.81E-07    |
| RP11-701H24.7 | TGFBR1   | -0.084090413 | 0.078415302 |
| RP11-701H24.7 | TGFBI    | -0.354340925 | 2.60E-14    |
| RP11-701H24.7 | ERBB3    | -0.215315432 | 5.60E-06    |
| RP11-701H24.7 | CCL18    | -0.219244604 | 3.74E-06    |
| RP11-701H24.7 | CCL17    | -0.368268777 | 1.51E-15    |
| RP11-701H24.7 | C16orf45 | -0.14638599  | 0.002124641 |
| RP11-701H24.7 | PRDM1    | 0.000216585  | 0.996389256 |
| RP11-701H24.7 | TRIM47   | -0.573775733 | 0           |
| RP11-701H24.7 | CNFN     | -0.511669224 | 0           |
| RP11-701H24.7 | ARMCX3   | 0.044261837  | 0.354722347 |
| RP11-701H24.7 | RAMP1    | -0.161671636 | 0.000683435 |
| RP11-701H24.7 | GABRD    | -0.104831115 | 0.028114113 |
| RP11-701H24.7 | COL13A1  | -0.208832624 | 1.07E-05    |
| RP11-701H24.7 | S100A5   | -0.406456143 | 0           |
| RP11-701H24.7 | MISP     | -0.349236916 | 6.60E-14    |
| RP11-701H24.7 | HES6     | -0.221075579 | 3.09E-06    |
| RP11-701H24.7 | PSD3     | 0.012063532  | 0.800926791 |
| RP11-701H24.7 | DOK7     | -0.192580783 | 5.03E-05    |
| RP11-701H24.7 | ZMAT3    | -0.111118471 | 0.019912874 |
| RP11-701H24.7 | MFAP2    | -0.226502835 | 1.74E-06    |
| RP11-701H24.7 | TMEM79   | -0.371355708 | 7.90E-16    |
| RP11-701H24.7 | SLC1A5   | -0.379807782 | 6.34E-17    |
| RP11-701H24.7 | BBC3     | -0.493968092 | 0           |
| RP11-701H24.7 | HLA-DQB2 | -0.479748069 | 0           |
| RP11-701H24.7 | C1QL1    | -0.091575158 | 0.055226736 |
| RP11-701H24.7 | TMEM215  | 0.002048296  | 0.965865539 |
| RP11-701H24.7 | PNP      | -0.285890751 | 1.26E-09    |

|               |           |              |             |
|---------------|-----------|--------------|-------------|
| RP11-701H24.7 | ARNTL     | -0.077432578 | 0.10517233  |
| RP11-701H24.7 | CLDN2     | -0.194342549 | 4.14E-05    |
| RP11-701H24.7 | MVP       | -0.545996789 | 0           |
| RP11-701H24.7 | LGALS1    | -0.504290715 | 0           |
| RP11-701H24.7 | BIRC7     | -0.332736813 | 8.27E-13    |
| RP11-701H24.7 | COL8A1    | -0.139108043 | 0.003519284 |
| RP11-701H24.7 | PERP      | -0.318474286 | 1.09E-11    |
| RP11-701H24.7 | GJA4      | -0.106887327 | 0.025159515 |
| RP11-701H24.7 | IGFL2     | -0.375284392 | 3.95E-16    |
| RP11-701H24.7 | DAPK2     | -0.090457765 | 0.058275159 |
| RP11-701H24.7 | MAMLD1    | -0.193458613 | 4.64E-05    |
| RP11-701H24.7 | ETV5      | -0.044861241 | 0.348238873 |
| RP11-701H24.7 | RUNX1     | -0.292630994 | 4.93E-10    |
| RP11-701H24.7 | LONRF2    | 0.126139165  | 0.008181461 |
| RP11-701H24.7 | SPOCK1    | 0.079468508  | 0.096315958 |
| RP11-701H24.7 | XKRX      | -0.024545199 | 0.60789437  |
| RP11-701H24.7 | TGFB1     | -0.302480731 | 1.20E-10    |
| RP11-701H24.7 | ERP27     | -0.126802963 | 0.007849158 |
| RP11-701H24.7 | TNFRSF10C | -0.184023749 | 0.000108159 |
| RP11-701H24.7 | PALM      | -0.217055915 | 4.68E-06    |
| RP11-701H24.7 | TSC22D1   | 0.018385071  | 0.700761065 |
| RP11-701H24.7 | TGM2      | -0.37573266  | 2.55E-16    |
| RP11-701H24.7 | UBE2QL1   | -0.10166999  | 0.033236546 |
| RP11-701H24.7 | ECE1      | -0.123011514 | 0.009922159 |
| RP11-701H24.7 | COL8A2    | -0.179242703 | 0.000163476 |
| RP11-701H24.7 | HIST3H2A  | -0.350117157 | 5.63E-14    |
| RP11-701H24.7 | TNFRSF21  | -0.171934119 | 0.000301359 |
| RP11-701H24.7 | SOX4      | -0.191832025 | 5.39E-05    |
| RP11-701H24.7 | ELF3      | -0.326832039 | 2.91E-12    |
| RP11-701H24.7 | TPD52L1   | -0.21537472  | 5.56E-06    |
| RP11-701H24.7 | INHBB     | 0.003076731  | 0.948726557 |
| RP11-701H24.7 | HPN       | -0.297757271 | 2.38E-10    |
| RP11-701H24.7 | MMP7      | -0.344363651 | 1.15E-13    |
| RP11-701H24.7 | RAB27A    | -0.07119529  | 0.136355673 |
| RP11-701H24.7 | IGF2BP2   | -0.116438924 | 0.014686493 |
| RP11-701H24.7 | ITGB4     | -0.283769152 | 1.68E-09    |
| RP11-701H24.7 | PPP1R1B   | -0.265002113 | 1.96E-08    |
| RP11-701H24.7 | NPDC1     | -0.39757572  | 0           |
| RP11-701H24.7 | CCL13     | -0.430383794 | 3.20E-21    |
| RP11-701H24.7 | SPINT1    | -0.514729786 | 0           |
| RP11-701H24.7 | HEY2      | -0.085207947 | 0.074519669 |
| RP11-701H24.7 | CST2      | -0.35602467  | 1.45E-14    |
| RP11-701H24.7 | ADM       | -0.261341013 | 3.09E-08    |
| RP11-701H24.7 | VSTM2L    | -0.409137715 | 0           |
| RP11-701H24.7 | FAM84A    | -0.373362419 | 4.82E-16    |
| RP11-701H24.7 | P4HA2     | -0.319744722 | 8.92E-12    |
| RP11-701H24.7 | LPL       | -0.076482269 | 0.109521132 |
| RP11-701H24.7 | TMEM173   | -0.373700559 | 4.42E-16    |
| RP11-701H24.7 | DHRS3     | -0.239844745 | 3.99E-07    |
| RP11-701H24.7 | SCN1B     | -0.470841974 | 0           |
| RP11-701H24.7 | GLT1D1    | -0.046532933 | 0.330556903 |

|               |            |              |             |
|---------------|------------|--------------|-------------|
| RP11-701H24.7 | PHYHIP     | -0.36625723  | 2.48E-15    |
| RP11-701H24.7 | BHLHE40    | -0.211319738 | 8.38E-06    |
| RP11-701H24.7 | BID        | -0.352021321 | 3.99E-14    |
| RP11-701H24.7 | POSTN      | -0.279466664 | 2.99E-09    |
| RP11-701H24.7 | ITGA3      | -0.375121058 | 3.02E-16    |
| RP11-701H24.7 | RSP04      | -0.171830862 | 0.000303922 |
| RP11-701H24.7 | ADAMTS9    | 0.094233328  | 0.048504428 |
| RP11-701H24.7 | ABTB2      | -0.191070218 | 5.77E-05    |
| RP11-701H24.7 | KCNQ3      | -0.179084697 | 0.000165694 |
| RP11-701H24.7 | ANXA1      | -0.106585782 | 0.025575287 |
| RP11-701H24.7 | S100A11    | -0.610788132 | 0           |
| RP11-701H24.7 | CEACAM6    | -0.325906379 | 2.54E-12    |
| RP11-701H24.7 | IER5L      | -0.355504557 | 2.09E-14    |
| RP11-701H24.7 | KRT80      | -0.257912384 | 4.72E-08    |
| RP11-701H24.7 | CDH6       | -0.305131526 | 8.17E-11    |
| RP11-701H24.7 | UNC5B      | -0.219964853 | 3.47E-06    |
| RP11-701H24.7 | PLEKHN1    | -0.327641078 | 2.55E-12    |
| RP11-701H24.7 | SYTL1      | -0.455914892 | 0           |
| RP11-701H24.7 | TMEM163    | -0.24029834  | 3.78E-07    |
| RP11-701H24.7 | C4orf48    | -0.388807065 | 0           |
| RP11-701H24.7 | B3GNT7     | -0.186282931 | 8.87E-05    |
| RP11-701H24.7 | BAIAP3     | -0.118729593 | 0.012836321 |
| RP11-701H24.7 | PHLDA2     | -0.441083267 | 0           |
| RP11-701H24.7 | GAP43      | -0.227531295 | 1.46E-06    |
| RP11-701H24.7 | S100A1     | -0.474224647 | 0           |
| RP11-701H24.7 | PTPRE      | -0.167795454 | 0.000421624 |
| RP11-701H24.7 | CCND1      | -0.153653299 | 0.00125482  |
| RP11-701H24.7 | ST6GALNAC5 | -0.328269508 | 1.73E-12    |
| RP11-701H24.7 | KRT17      | -0.175801167 | 0.000218689 |
| RP11-701H24.7 | HPCAL4     | -0.068399255 | 0.15245972  |
| RP11-701H24.7 | GABBR2     | -0.168210044 | 0.000407816 |
| RP11-701H24.7 | DIRAS3     | -0.150121838 | 0.001625376 |
| RP11-701H24.7 | SERINC2    | -0.460157524 | 0           |
| RP11-701H24.7 | PTCHD4     | -0.149953903 | 0.001645278 |
| RP11-701H24.7 | EPS8       | 0.08976716   | 0.060228023 |
| RP11-701H24.7 | LY6E       | -0.405672776 | 0           |
| RP11-701H24.7 | UPP1       | -0.380031459 | 5.75E-17    |
| RP11-701H24.7 | AHNAK2     | -0.311509516 | 3.15E-11    |
| RP11-701H24.7 | PLXNC1     | -0.146796041 | 0.002063689 |
| RP11-701H24.7 | TNC        | -0.27865493  | 3.33E-09    |
| RP11-701H24.7 | DUSP4      | -0.219604161 | 3.60E-06    |
| RP11-701H24.7 | NRCAM      | 0.042361787  | 0.375772451 |
| RP11-701H24.7 | NRP2       | -0.159372172 | 0.000815866 |
| RP11-701H24.7 | CTSC       | -0.408798583 | 0           |
| RP11-701H24.7 | AMIGO2     | -0.031382884 | 0.511784745 |
| RP11-701H24.7 | NAB2       | -0.131038219 | 0.005998503 |
| RP11-701H24.7 | TBC1D2     | -0.310978761 | 3.42E-11    |
| RP11-701H24.7 | PHLDA3     | -0.564809215 | 0           |
| RP11-701H24.7 | PTP4A3     | -0.487147003 | 0           |
| RP11-701H24.7 | CRABP2     | -0.467874173 | 0           |
| RP11-701H24.7 | GOS2       | -0.302438038 | 1.21E-10    |

|               |         |              |             |
|---------------|---------|--------------|-------------|
| RP11-701H24.7 | S100A6  | -0.549011537 | 0           |
| RP11-701H24.7 | FOXQ1   | -0.229121291 | 1.31E-06    |
| RP11-701H24.7 | LRG1    | -0.295244768 | 3.41E-10    |
| RP11-701H24.7 | LAMP5   | -0.262967318 | 2.53E-08    |
| RP11-701H24.7 | ALDH3B1 | -0.360171708 | 8.56E-15    |
| RP11-701H24.7 | CDH2    | 0.121425775  | 0.010924624 |
| RP11-701H24.7 | SCG5    | -0.20671925  | 1.32E-05    |
| RP11-701H24.7 | ZCCHC16 | 0.008171292  | 0.864442124 |
| RP11-701H24.7 | GRB7    | -0.287197922 | 1.05E-09    |
| RP11-701H24.7 | TIAM1   | -0.023803533 | 0.618783953 |
| RP11-701H24.7 | FXYD5   | -0.480004369 | 0           |
| RP11-701H24.7 | CLDN9   | -0.271498254 | 8.53E-09    |
| RP11-701H24.7 | FAM43A  | -0.214493485 | 6.09E-06    |
| RP11-701H24.7 | CHST2   | -0.19762749  | 3.16E-05    |
| RP11-701H24.7 | HMGA2   | -0.237072964 | 5.45E-07    |
| RP11-701H24.7 | GALNT7  | -0.067249381 | 0.15948666  |
| RP11-701H24.7 | CBLN1   | -0.270645104 | 9.52E-09    |
| RP11-701H24.7 | STRA6   | -0.285674166 | 1.29E-09    |
| RP11-701H24.7 | MUC21   | -0.354718775 | 1.84E-14    |
| RP11-701H24.7 | PRR36   | -0.28093014  | 2.46E-09    |
| RP11-701H24.7 | NFE2L3  | -0.397718692 | 0           |
| RP11-701H24.7 | NR1D1   | -0.303569757 | 1.03E-10    |
| RP11-701H24.7 | MUC1    | -0.464502563 | 0           |
| RP11-701H24.7 | NAT8L   | -0.051271854 | 0.283640512 |
| RP11-701H24.7 | APOC1   | -0.139806307 | 0.003356235 |
| RP11-701H24.7 | EVA1A   | -0.24997064  | 1.23E-07    |
| RP11-701H24.7 | ENTPD1  | 0.010592539  | 0.824780939 |
| RP11-701H24.7 | COL1A1  | -0.345683612 | 1.24E-13    |
| RP11-701H24.7 | FNDC4   | -0.353031911 | 3.31E-14    |
| RP11-701H24.7 | FRMD3   | 0.061862407  | 0.195686929 |
| RP11-701H24.7 | SHROOM4 | -0.033838652 | 0.479305005 |
| RP11-701H24.7 | NELL2   | 0.073570353  | 0.123733345 |
| RP11-701H24.7 | EPHB3   | -0.351957211 | 4.04E-14    |
| RP11-701H24.7 | TMC6    | -0.337294088 | 5.23E-13    |
| RP11-701H24.7 | NOD1    | -0.042079247 | 0.378967058 |
| RP11-701H24.7 | GGCT    | -0.358405552 | 1.21E-14    |
| RP11-701H24.7 | ICAM1   | -0.304130439 | 9.46E-11    |
| RP11-701H24.7 | PRSS23  | -0.250206657 | 1.20E-07    |
| RP11-701H24.7 | CFI     | -0.309686909 | 4.15E-11    |
| RP11-701H24.7 | CD55    | -0.232243551 | 9.32E-07    |
| RP11-701H24.7 | RASD2   | -0.067019179 | 0.160922336 |
| RP11-701H24.7 | KLK11   | -0.116482004 | 0.014609047 |
| RP11-701H24.7 | ICAM5   | -0.126476028 | 0.008011287 |
| RP11-701H24.7 | ADORA1  | -0.426086543 | 0           |
| RP11-701H24.7 | ITGA2   | -0.206030773 | 1.41E-05    |
| RP11-701H24.7 | ABCC3   | -0.036109748 | 0.450295459 |
| RP11-701H24.7 | MFGE8   | -0.342983317 | 1.98E-13    |
| RP11-701H24.7 | STK32A  | -0.106020419 | 0.026370803 |
| RP11-701H24.7 | CYSLTR2 | 0.036792268  | 0.441775282 |
| RP11-701H24.7 | LAD1    | -0.357945149 | 1.32E-14    |
| RP11-701H24.7 | MGAT3   | -0.154653109 | 0.001165041 |



|               |           |              |             |
|---------------|-----------|--------------|-------------|
| RP11-701H24.7 | IGFBP6    | -0.286292292 | 1.19E-09    |
| RP11-701H24.7 | CYP2S1    | -0.378917754 | 9.07E-17    |
| RP11-701H24.7 | KCNJ2     | -0.24387448  | 2.51E-07    |
| RP11-701H24.7 | FAM20A    | -0.374609877 | 3.48E-16    |
| RP11-701H24.7 | TGFA      | -0.101108174 | 0.034225732 |
| RP11-701H24.7 | MXRA8     | -0.32202915  | 6.24E-12    |
| RP11-701H24.7 | C8orf4    | -0.208116914 | 1.15E-05    |
| RP11-701H24.7 | CLDN10    | -0.274086834 | 5.27E-09    |
| RP11-701H24.7 | PDE5A     | 0.011266974  | 0.813822585 |
| RP11-701H24.7 | APOE      | -0.084684285 | 0.076325019 |
| RP11-701H24.7 | SPOCK2    | -0.148479931 | 0.001829798 |
| RP11-701H24.7 | TENM1     | -0.038427225 | 0.42174419  |
| RP11-701H24.7 | SLIT1     | -0.147306087 | 0.001990107 |
| RP11-701H24.7 | CXCL14    | -0.112955829 | 0.017949117 |
| RP11-701H24.7 | ECM1      | -0.309938102 | 4.00E-11    |
| RP11-701H24.7 | DUSP5     | -0.198803604 | 2.83E-05    |
| RP11-701H24.7 | SEZ6L2    | -0.454256107 | 0           |
| RP11-701H24.7 | THRSP     | -0.241493744 | 3.30E-07    |
| RP11-701H24.7 | C19orf33  | -0.414553057 | 0           |
| RP11-701H24.7 | MPZL2     | -0.19730013  | 3.25E-05    |
| RP11-701H24.7 | CTSH      | -0.328578905 | 2.20E-12    |
| RP11-701H24.7 | CYP1B1    | -0.158579728 | 0.000866752 |
| RP11-701H24.7 | ALOX5     | -0.442490433 | 0           |
| RP11-701H24.7 | SYTL5     | -0.105089546 | 0.027687048 |
| RP11-701H24.7 | TNFRSF12A | -0.196607965 | 3.47E-05    |
| RP11-701H24.7 | DUSP6     | -0.096841429 | 0.04258881  |
| RP11-701H24.7 | ALOX15B   | -0.382081148 | 1.68E-17    |
| RP11-701H24.7 | SDC4      | -0.106570463 | 0.025596565 |
| RP11-701H24.7 | MDK       | -0.347164108 | 9.55E-14    |
| RP11-701H24.7 | KRT19     | -0.425291972 | 0           |
| RP11-701H24.7 | MET       | -0.146052531 | 0.002175417 |
| RP11-701H24.7 | TESC      | -0.099596048 | 0.037013598 |
| RP11-701H24.7 | CXCL17    | -0.448921203 | 3.71E-23    |
| RP11-701H24.7 | NPC2      | -0.399672924 | 0           |
| RP11-701H24.7 | COMP      | -0.254869552 | 6.84E-08    |
| RP11-701H24.7 | TUSC3     | -0.147955276 | 0.001899927 |
| RP11-701H24.7 | TMPRSS4   | -0.328595642 | 2.19E-12    |
| RP11-701H24.7 | LGALS3    | -0.418395992 | 0           |
| RP11-701H24.7 | CRLF1     | -0.149682001 | 0.001677975 |
| RP11-701H24.7 | CTXN1     | -0.327996664 | 2.41E-12    |
| RP11-701H24.7 | PCSK1N    | -0.232971601 | 8.60E-07    |
| RP11-701H24.7 | NMU       | -0.320045036 | 6.51E-12    |
| RP11-701H24.7 | GALE      | -0.439327181 | 0           |
| RP11-701H24.7 | PCSK2     | -0.199199188 | 2.72E-05    |
| RP11-701H24.7 | GJB3      | -0.242924455 | 2.80E-07    |
| RP11-701H24.7 | SLPI      | -0.381547273 | 2.53E-17    |
| RP11-701H24.7 | AGR2      | -0.135447085 | 0.004497781 |
| RP11-701H24.7 | MRC2      | -0.213002352 | 7.08E-06    |
| RP11-701H24.7 | GOLT1A    | -0.362710025 | 5.17E-15    |
| RP11-701H24.7 | SLC27A6   | -0.088755652 | 0.063168495 |
| RP11-701H24.7 | KCNN4     | -0.46192212  | 0           |

|               |          |              |             |
|---------------|----------|--------------|-------------|
| RP11-701H24.7 | ETV4     | -0.184493733 | 0.000101083 |
| RP11-701H24.7 | SYT12    | -0.208883827 | 1.07E-05    |
| RP11-701H24.7 | PVRL4    | -0.395228599 | 0           |
| RP11-701H24.7 | PLCD3    | -0.187451669 | 7.99E-05    |
| RP11-701H24.7 | PLAU     | -0.46134541  | 0           |
| RP11-701H24.7 | LRRK2    | -0.0199206   | 0.677121413 |
| RP11-701H24.7 | SFN      | -0.457339079 | 0           |
| RP11-701H24.7 | LPAR5    | -0.154867141 | 0.001146608 |
| RP11-701H24.7 | NGEF     | -0.367980268 | 1.71E-15    |
| RP11-701H24.7 | DTX4     | -0.151730271 | 0.001445651 |
| RP11-701H24.7 | CST6     | -0.290052678 | 7.07E-10    |
| RP11-701H24.7 | QPCT     | -0.221712854 | 2.89E-06    |
| RP11-701H24.7 | TIMP1    | -0.387098353 | 0           |
| RP11-701H24.7 | CAMK2N1  | -0.226606944 | 1.72E-06    |
| RP11-701H24.7 | KLHDC8A  | -0.166231274 | 0.000477737 |
| RP11-701H24.7 | PDLIM4   | -0.388059157 | 0           |
| RP11-701H24.7 | SCEL     | -0.137625987 | 0.003889409 |
| RP11-701H24.7 | LCN2     | -0.486100103 | 0           |
| RP11-701H24.7 | PROS1    | -0.208677454 | 1.09E-05    |
| RP11-701H24.7 | GABRB2   | -0.114305693 | 0.016616297 |
| RP11-701H24.7 | TMPRSS6  | -0.318728175 | 1.04E-11    |
| RP11-701H24.7 | KLK7     | -0.166093738 | 0.000475075 |
| RP11-701H24.7 | PDZK1IP1 | -0.509804775 | 0           |
| RP11-701H24.7 | CDH3     | -0.21388004  | 6.48E-06    |
| RP11-701H24.7 | LRP4     | -0.008244141 | 0.863191275 |
| RP11-701H24.7 | IGSF1    | -0.147982792 | 0.001896188 |
| RP11-701H24.7 | B3GNT3   | -0.357935078 | 1.32E-14    |
| RP11-701H24.7 | CLDN1    | -0.189636812 | 6.57E-05    |
| RP11-701H24.7 | GDF15    | -0.370064848 | 1.07E-15    |
| RP11-701H24.7 | ARHGAP36 | -0.159715814 | 0.000783779 |
| RP11-701H24.7 | LAMB3    | -0.300113895 | 1.70E-10    |
| RP11-701H24.7 | KLK10    | -0.253780243 | 7.80E-08    |
| RP11-701H24.7 | DPP4     | -0.209763643 | 9.79E-06    |
| RP11-701H24.7 | METTL7B  | -0.221172596 | 3.06E-06    |
| RP11-701H24.7 | LIPH     | -0.314004147 | 2.16E-11    |
| RP11-701H24.7 | CLDN16   | -0.149688809 | 0.00167715  |
| RP11-701H24.7 | CHI3L1   | -0.41866293  | 0           |
| RP11-701H24.7 | SLC22A31 | -0.376669698 | 3.02E-16    |
| RP11-701H24.7 | TACSTD2  | -0.244884218 | 2.23E-07    |
| RP11-701H24.7 | SFTPB    | -0.433049612 | 0           |
| RP11-701H24.7 | RXRG     | -0.193142742 | 4.78E-05    |
| RP11-701H24.7 | DCSTAMP  | -0.268594543 | 1.08E-08    |
| RP11-701H24.7 | CITED1   | -0.350994136 | 4.81E-14    |
| RP11-701H24.7 | SERPINA1 | -0.440575064 | 0           |
| RP11-701H24.7 | PRR15    | -0.137138634 | 0.004018613 |
| RP11-701H24.7 | SLC34A2  | -0.286141094 | 1.21E-09    |
| RP11-701H24.7 | FN1      | -0.362416139 | 5.48E-15    |
| RP11-701H24.7 | ZCCHC12  | -0.036961054 | 0.439682542 |
| RP11-449J21.5 | TFF3     | 0.684970512  | 0           |
| RP11-449J21.5 | CCL21    | 0.428757772  | 4.66E-21    |
| RP11-449J21.5 | TPO      | 0.698103638  | 0           |

|               |           |             |             |
|---------------|-----------|-------------|-------------|
| RP11-449J21.5 | MT1G      | 0.579133347 | 0           |
| RP11-449J21.5 | DI01      | 0.590655061 | 0           |
| RP11-449J21.5 | DPT       | 0.318981893 | 7.70E-12    |
| RP11-449J21.5 | CDH16     | 0.639029891 | 0           |
| RP11-449J21.5 | CRABP1    | 0.634914937 | 6.44E-51    |
| RP11-449J21.5 | SLC26A7   | 0.666049581 | 0           |
| RP11-449J21.5 | MT1H      | 0.529881613 | 3.80E-33    |
| RP11-449J21.5 | SLC26A4   | 0.692738364 | 0           |
| RP11-449J21.5 | SLC5A8    | 0.555896194 | 5.72E-37    |
| RP11-449J21.5 | PKHD1L1   | 0.618469896 | 1.10E-47    |
| RP11-449J21.5 | TFCP2L1   | 0.581524153 | 0           |
| RP11-449J21.5 | WSCD2     | 0.689009491 | 4.42E-63    |
| RP11-449J21.5 | IPCEF1    | 0.608493207 | 0           |
| RP11-449J21.5 | SLC5A5    | 0.5131207   | 7.45E-31    |
| RP11-449J21.5 | MT1F      | 0.61653821  | 0           |
| RP11-449J21.5 | FOSB      | 0.440995612 | 0           |
| RP11-449J21.5 | SEMA3D    | 0.634484175 | 7.88E-51    |
| RP11-449J21.5 | BMP8A     | 0.631354091 | 0           |
| RP11-449J21.5 | MATN2     | 0.690814911 | 0           |
| RP11-449J21.5 | PLA2R1    | 0.570113498 | 0           |
| RP11-449J21.5 | COL23A1   | 0.681243032 | 0           |
| RP11-449J21.5 | HGD       | 0.668980503 | 0           |
| RP11-449J21.5 | TCEAL2    | 0.553914705 | 0           |
| RP11-449J21.5 | CHRD1     | 0.309894073 | 3.17E-11    |
| RP11-449J21.5 | TNFRSF11B | 0.47466108  | 0           |
| RP11-449J21.5 | FAM167A   | 0.701140796 | 0           |
| RP11-449J21.5 | KIT       | 0.624897523 | 0           |
| RP11-449J21.5 | SLC4A4    | 0.683602493 | 0           |
| RP11-449J21.5 | SMOC2     | 0.472450974 | 0           |
| RP11-449J21.5 | FHL1      | 0.702262019 | 0           |
| RP11-449J21.5 | OTOS      | 0.554192706 | 0           |
| RP11-449J21.5 | IGFBPL1   | 0.590285659 | 1.44E-42    |
| RP11-449J21.5 | HBB       | 0.389757799 | 0           |
| RP11-449J21.5 | BEX1      | 0.70372592  | 0           |
| RP11-449J21.5 | FABP4     | 0.60045907  | 2.34E-44    |
| RP11-449J21.5 | LMOD1     | 0.697598697 | 0           |
| RP11-449J21.5 | SOD3      | 0.569182905 | 0           |
| RP11-449J21.5 | TMEM171   | 0.492245339 | 0           |
| RP11-449J21.5 | PI16      | 0.373472911 | 4.69E-16    |
| RP11-449J21.5 | ZMAT4     | 0.67846407  | 1.67E-60    |
| RP11-449J21.5 | MFAP4     | 0.353488342 | 3.05E-14    |
| RP11-449J21.5 | CWH43     | 0.572891824 | 1.18E-39    |
| RP11-449J21.5 | SPX       | 0.748399084 | 0           |
| RP11-449J21.5 | APOD      | 0.187657475 | 7.85E-05    |
| RP11-449J21.5 | DPP6      | 0.650277292 | 0           |
| RP11-449J21.5 | MMRN1     | 0.436840351 | 0           |
| RP11-449J21.5 | WDR72     | 0.589653549 | 0           |
| RP11-449J21.5 | MPPED2    | 0.757224758 | 0           |
| RP11-449J21.5 | PAPSS2    | 0.469934358 | 0           |
| RP11-449J21.5 | DCN       | 0.117959134 | 0.013434269 |
| RP11-449J21.5 | SORBS2    | 0.700182119 | 0           |

|               |            |             |             |
|---------------|------------|-------------|-------------|
| RP11-449J21.5 | EGR2       | 0.414933181 | 0           |
| RP11-449J21.5 | EDN3       | 0.652610971 | 1.27E-54    |
| RP11-449J21.5 | DIO2       | 0.64756877  | 0           |
| RP11-449J21.5 | ITPR1      | 0.700864923 | 0           |
| RP11-449J21.5 | CFD        | 0.307061078 | 6.14E-11    |
| RP11-449J21.5 | CPXM1      | 0.496745263 | 0           |
| RP11-449J21.5 | ELMO1      | 0.71919879  | 0           |
| RP11-449J21.5 | GPC3       | 0.509533317 | 2.22E-30    |
| RP11-449J21.5 | MYOC       | 0.385959249 | 4.82E-17    |
| RP11-449J21.5 | DEPTOR     | 0.604911678 | 0           |
| RP11-449J21.5 | DGKI       | 0.578923711 | 0           |
| RP11-449J21.5 | CARTPT     | 0.623789928 | 1.04E-48    |
| RP11-449J21.5 | IYD        | 0.498080234 | 0           |
| RP11-449J21.5 | LYVE1      | 0.418109623 | 0           |
| RP11-449J21.5 | CLCNKB     | 0.736694259 | 0           |
| RP11-449J21.5 | NCAM1      | 0.369778904 | 1.14E-15    |
| RP11-449J21.5 | HBA2       | 0.375734645 | 2.54E-16    |
| RP11-449J21.5 | GLT8D2     | 0.547757839 | 0           |
| RP11-449J21.5 | OGDHL      | 0.55159198  | 0           |
| RP11-449J21.5 | LIFR       | 0.568785335 | 0           |
| RP11-449J21.5 | CSGALNACT1 | 0.452597463 | 0           |
| RP11-449J21.5 | RAP1GAP    | 0.546077069 | 0           |
| RP11-449J21.5 | COL9A3     | 0.730647884 | 0           |
| RP11-449J21.5 | FBLN1      | 0.164823966 | 0.000534084 |
| RP11-449J21.5 | EFEMP1     | 0.428184456 | 0           |
| RP11-449J21.5 | AOX1       | 0.488886369 | 9.34E-28    |
| RP11-449J21.5 | GRIN2C     | 0.584367704 | 0           |
| RP11-449J21.5 | C11orf74   | 0.651451136 | 0           |
| RP11-449J21.5 | PPARGC1A   | 0.562246218 | 0           |
| RP11-449J21.5 | ANGPTL1    | 0.629563822 | 0           |
| RP11-449J21.5 | SCARA5     | 0.296653329 | 2.28E-10    |
| RP11-449J21.5 | LTF        | 0.563005047 | 0           |
| RP11-449J21.5 | CA4        | 0.688835464 | 4.88E-63    |
| RP11-449J21.5 | TG         | 0.686945169 | 0           |
| RP11-449J21.5 | FCGBP      | 0.703531319 | 0           |
| RP11-449J21.5 | PBX4       | 0.757473966 | 0           |
| RP11-449J21.5 | CYR61      | 0.486135846 | 0           |
| RP11-449J21.5 | FOS        | 0.456201687 | 0           |
| RP11-449J21.5 | KHDRBS2    | 0.777079261 | 0           |
| RP11-449J21.5 | MUM1L1     | 0.498166897 | 0           |
| RP11-449J21.5 | RGS16      | 0.611046843 | 0           |
| RP11-449J21.5 | MT1M       | 0.504330429 | 0           |
| RP11-449J21.5 | LRP2       | 0.584855624 | 0           |
| RP11-449J21.5 | MAFB       | 0.518077284 | 0           |
| RP11-449J21.5 | KCNK2      | 0.552247268 | 0           |
| RP11-449J21.5 | TBC1D4     | 0.601239515 | 0           |
| RP11-449J21.5 | MIOX       | 0.70327164  | 9.53E-67    |
| RP11-449J21.5 | TPPP       | 0.578487562 | 0           |
| RP11-449J21.5 | FMOD       | 0.517342001 | 0           |
| RP11-449J21.5 | CITED2     | 0.440482728 | 0           |
| RP11-449J21.5 | RGS8       | 0.67936004  | 1.02E-60    |

|               |          |             |             |
|---------------|----------|-------------|-------------|
| RP11-449J21.5 | ABI3BP   | 0.343149834 | 1.93E-13    |
| RP11-449J21.5 | ADH1B    | 0.375213997 | 4.00E-16    |
| RP11-449J21.5 | OGN      | 0.219046464 | 3.61E-06    |
| RP11-449J21.5 | NR4A1    | 0.414624685 | 0           |
| RP11-449J21.5 | FOXJ1    | 0.859529118 | 1.82E-129   |
| RP11-449J21.5 | ALDH1A1  | 0.654319934 | 0           |
| RP11-449J21.5 | OCA2     | 0.578106253 | 1.65E-40    |
| RP11-449J21.5 | TMEM139  | 0.429186252 | 0           |
| RP11-449J21.5 | ARHGAP24 | 0.627809864 | 0           |
| RP11-449J21.5 | SLC25A15 | 0.538578281 | 0           |
| RP11-449J21.5 | DES      | 0.282173778 | 1.77E-09    |
| RP11-449J21.5 | GDF10    | 0.489268955 | 8.38E-28    |
| RP11-449J21.5 | KIAA1324 | 0.57851054  | 0           |
| RP11-449J21.5 | JUN      | 0.471691862 | 0           |
| RP11-449J21.5 | C7       | 0.089110454 | 0.062134918 |
| RP11-449J21.5 | LGI3     | 0.68168528  | 0           |
| RP11-449J21.5 | CDON     | 0.716697493 | 0           |
| RP11-449J21.5 | BCL2     | 0.600082975 | 0           |
| RP11-449J21.5 | HLF      | 0.710452687 | 0           |
| RP11-449J21.5 | EGR1     | 0.481427279 | 0           |
| RP11-449J21.5 | IP6K3    | 0.660728419 | 0           |
| RP11-449J21.5 | SCUBE3   | 0.597670609 | 0           |
| RP11-449J21.5 | PKNOX2   | 0.671566761 | 0           |
| RP11-449J21.5 | SMAD9    | 0.459073889 | 0           |
| RP11-449J21.5 | IQGAP2   | 0.599115078 | 0           |
| RP11-449J21.5 | GNA14    | 0.737411671 | 0           |
| RP11-449J21.5 | LAYN     | 0.638384106 | 0           |
| RP11-449J21.5 | AVPR1A   | 0.664549653 | 0           |
| RP11-449J21.5 | PDLIM3   | 0.454717361 | 0           |
| RP11-449J21.5 | GPM6A    | 0.566426726 | 0           |
| RP11-449J21.5 | SDPR     | 0.593625697 | 0           |
| RP11-449J21.5 | CRYAB    | 0.235184544 | 6.73E-07    |
| RP11-449J21.5 | FOXA2    | 0.576928499 | 2.58E-40    |
| RP11-449J21.5 | C8orf88  | 0.547148506 | 0           |
| RP11-449J21.5 | ISM1     | 0.552477185 | 0           |
| RP11-449J21.5 | BMP2     | 0.328835489 | 2.11E-12    |
| RP11-449J21.5 | ID4      | 0.585778558 | 0           |
| RP11-449J21.5 | NUPR1    | 0.281634219 | 2.24E-09    |
| RP11-449J21.5 | SERTM1   | 0.456936123 | 4.95E-24    |
| RP11-449J21.5 | IRS1     | 0.689466182 | 0           |
| RP11-449J21.5 | FIBIN    | 0.157609846 | 0.000933024 |
| RP11-449J21.5 | PODN     | 0.197139429 | 3.30E-05    |
| RP11-449J21.5 | TDRD9    | 0.406997535 | 0           |
| RP11-449J21.5 | EPHA3    | 0.374026359 | 4.06E-16    |
| RP11-449J21.5 | AIF1L    | 0.53458202  | 0           |
| RP11-449J21.5 | EBF4     | 0.739538377 | 0           |
| RP11-449J21.5 | ADM2     | 0.520252924 | 0           |
| RP11-449J21.5 | GSTM3    | 0.681666983 | 0           |
| RP11-449J21.5 | HSD17B6  | 0.481738044 | 0           |
| RP11-449J21.5 | AGR3     | 0.417866259 | 5.57E-20    |
| RP11-449J21.5 | EPHB1    | 0.42461626  | 0           |

|               |          |             |             |
|---------------|----------|-------------|-------------|
| RP11-449J21.5 | TMOD1    | 0.339097263 | 3.86E-13    |
| RP11-449J21.5 | WASF3    | 0.639432708 | 0           |
| RP11-449J21.5 | SELV     | 0.706476653 | 1.33E-67    |
| RP11-449J21.5 | ENPP1    | 0.2647278   | 2.02E-08    |
| RP11-449J21.5 | SYNE1    | 0.680849742 | 4.45E-61    |
| RP11-449J21.5 | PLCH1    | 0.545669287 | 0           |
| RP11-449J21.5 | CCDC146  | 0.733085355 | 0           |
| RP11-449J21.5 | SLC16A2  | 0.69259752  | 0           |
| RP11-449J21.5 | IER2     | 0.590968663 | 0           |
| RP11-449J21.5 | KCNAB1   | 0.727384637 | 0           |
| RP11-449J21.5 | SYNDIG1  | 0.538290068 | 0           |
| RP11-449J21.5 | C16orf89 | 0.751616234 | 0           |
| RP11-449J21.5 | CTGF     | 0.365885475 | 2.68E-15    |
| RP11-449J21.5 | NR4A3    | 0.21394571  | 6.43E-06    |
| RP11-449J21.5 | KIAA1456 | 0.614276616 | 0           |
| RP11-449J21.5 | AQP4     | 0.501909553 | 0           |
| RP11-449J21.5 | RNF150   | 0.688964788 | 0           |
| RP11-449J21.5 | C1S      | 0.050199707 | 0.293839966 |
| RP11-449J21.5 | PFKFB2   | 0.480614836 | 0           |
| RP11-449J21.5 | PROX1    | 0.55223507  | 0           |
| RP11-449J21.5 | TCF7L1   | 0.743508256 | 0           |
| RP11-449J21.5 | HSPB6    | 0.444514307 | 0           |
| RP11-449J21.5 | FHDC1    | 0.529605664 | 0           |
| RP11-449J21.5 | PRR15L   | 0.48729962  | 0           |
| RP11-449J21.5 | SLC1A1   | 0.34608416  | 1.16E-13    |
| RP11-449J21.5 | BTBD11   | 0.810013701 | 0           |
| RP11-449J21.5 | TRIM58   | 0.510197522 | 0           |
| RP11-449J21.5 | LRIG1    | 0.488767208 | 0           |
| RP11-449J21.5 | ROR2     | 0.400285234 | 0           |
| RP11-449J21.5 | GPR125   | 0.632942241 | 0           |
| RP11-449J21.5 | FLRT1    | 0.781789531 | 0           |
| RP11-449J21.5 | PGF      | 0.67424805  | 0           |
| RP11-449J21.5 | DUSP1    | 0.395615247 | 0           |
| RP11-449J21.5 | PLA2G7   | 0.444576857 | 0           |
| RP11-449J21.5 | PLSCR4   | 0.453407921 | 0           |
| RP11-449J21.5 | FAM46B   | 0.413150713 | 0           |
| RP11-449J21.5 | GLDC     | 0.506579683 | 0           |
| RP11-449J21.5 | ZBTB16   | 0.410935359 | 0           |
| RP11-449J21.5 | OMD      | 0.117263187 | 0.013955042 |
| RP11-449J21.5 | HSD11B2  | 0.689642485 | 0           |
| RP11-449J21.5 | FGL2     | 0.187403728 | 8.03E-05    |
| RP11-449J21.5 | CLCNKA   | 0.746690328 | 2.14E-79    |
| RP11-449J21.5 | GATM     | 0.576741122 | 0           |
| RP11-449J21.5 | TNS3     | 0.446006859 | 0           |
| RP11-449J21.5 | TOB1     | 0.440623005 | 0           |
| RP11-449J21.5 | MARC2    | 0.675844853 | 0           |
| RP11-449J21.5 | LRRC2    | 0.504468579 | 0           |
| RP11-449J21.5 | SORD     | 0.383505334 | 0           |
| RP11-449J21.5 | RIMS4    | 0.568836113 | 0           |
| RP11-449J21.5 | SLC29A4  | 0.66925666  | 0           |
| RP11-449J21.5 | SLC39A14 | 0.573118034 | 0           |

|               |          |              |             |
|---------------|----------|--------------|-------------|
| RP11-449J21.5 | FAXDC2   | 0.729080583  | 0           |
| RP11-449J21.5 | HSPB8    | 0.304473118  | 9.00E-11    |
| RP11-449J21.5 | CCL19    | -0.016923361 | 0.72364005  |
| RP11-449J21.5 | KCNIP3   | 0.715341104  | 0           |
| RP11-449J21.5 | CGNL1    | 0.538307514  | 0           |
| RP11-449J21.5 | ATF3     | 0.160928835  | 0.000723861 |
| RP11-449J21.5 | SGCD     | 0.280660223  | 2.55E-09    |
| RP11-449J21.5 | STARD13  | 0.581970799  | 0           |
| RP11-449J21.5 | LDHD     | 0.644124681  | 0           |
| RP11-449J21.5 | RCAN1    | 0.393281175  | 0           |
| RP11-449J21.5 | ID3      | 0.399942414  | 0           |
| RP11-449J21.5 | SYTL3    | 0.619689689  | 0           |
| RP11-449J21.5 | MT1E     | 0.427071886  | 0           |
| RP11-449J21.5 | CAMK1D   | 0.633751706  | 0           |
| RP11-449J21.5 | PRKCQ    | 0.682111075  | 0           |
| RP11-449J21.5 | NUAK2    | 0.422925277  | 0           |
| RP11-449J21.5 | LIPG     | 0.629563113  | 0           |
| RP11-449J21.5 | SLC25A25 | 0.308742132  | 4.78E-11    |
| RP11-449J21.5 | PRKX     | 0.25439298   | 7.24E-08    |
| RP11-449J21.5 | SRPX     | 0.274874971  | 5.49E-09    |
| RP11-449J21.5 | FAM189A1 | 0.711036631  | 0           |
| RP11-449J21.5 | PLEKHH1  | 0.595178389  | 0           |
| RP11-449J21.5 | WNT11    | 0.564866233  | 0           |
| RP11-449J21.5 | SNAI1    | 0.425607559  | 0           |
| RP11-449J21.5 | FDCSP    | 0.071595427  | 0.13420175  |
| RP11-449J21.5 | MT1X     | 0.389348031  | 0           |
| RP11-449J21.5 | ACACB    | 0.702961701  | 0           |
| RP11-449J21.5 | ARC      | 0.271498821  | 8.53E-09    |
| RP11-449J21.5 | KLK4     | 0.171369101  | 0.000309683 |
| RP11-449J21.5 | ZFPM2    | 0.390240613  | 0           |
| RP11-449J21.5 | AKAP12   | 0.379608927  | 6.90E-17    |
| RP11-449J21.5 | GJB6     | 0.412709658  | 1.75E-19    |
| RP11-449J21.5 | ERO1LB   | 0.673819277  | 0           |
| RP11-449J21.5 | DNALI1   | 0.66279995   | 0           |
| RP11-449J21.5 | HKDC1    | 0.351196396  | 4.64E-14    |
| RP11-449J21.5 | ZFP36L2  | 0.486477957  | 0           |
| RP11-449J21.5 | CAPSL    | 0.728834053  | 6.74E-74    |
| RP11-449J21.5 | CYP7B1   | 0.513970532  | 0           |
| RP11-449J21.5 | CPQ      | 0.575446716  | 0           |
| RP11-449J21.5 | RPS6KA6  | 0.724663659  | 1.12E-72    |
| RP11-449J21.5 | TLE1     | 0.459852007  | 0           |
| RP11-449J21.5 | TP53INP2 | 0.684859454  | 0           |
| RP11-449J21.5 | KATNAL2  | 0.746769943  | 0           |
| RP11-449J21.5 | SGPP2    | 0.186421931  | 8.76E-05    |
| RP11-449J21.5 | CTH      | 0.483429735  | 0           |
| RP11-449J21.5 | KIF12    | 0.522346298  | 0           |
| RP11-449J21.5 | TMEM220  | 0.627356128  | 0           |
| RP11-449J21.5 | CENPJ    | 0.565128774  | 0           |
| RP11-449J21.5 | FAM155B  | 0.597227935  | 0           |
| RP11-449J21.5 | WFS1     | 0.631495644  | 0           |
| RP11-449J21.5 | SELENBP1 | 0.671875683  | 0           |

|               |          |             |             |
|---------------|----------|-------------|-------------|
| RP11-449J21.5 | SNTA1    | 0.473272069 | 0           |
| RP11-449J21.5 | FRAS1    | 0.210956209 | 8.69E-06    |
| RP11-449J21.5 | FBLN7    | 0.590591659 | 0           |
| RP11-449J21.5 | AGPAT9   | 0.597661389 | 0           |
| RP11-449J21.5 | GPR83    | 0.647475299 | 0           |
| RP11-449J21.5 | PRTG     | 0.5941617   | 0           |
| RP11-449J21.5 | EGR3     | 0.272716635 | 7.28E-09    |
| RP11-449J21.5 | GRAMD2   | 0.447556855 | 0           |
| RP11-449J21.5 | HYOU1    | 0.566046886 | 0           |
| RP11-449J21.5 | FBLN5    | 0.37709926  | 1.69E-16    |
| RP11-449J21.5 | ITM2A    | 0.633433565 | 0           |
| RP11-449J21.5 | SRF      | 0.563602465 | 0           |
| RP11-449J21.5 | FGFR2    | 0.536876661 | 0           |
| RP11-449J21.5 | MT1A     | 0.231619405 | 9.30E-07    |
| RP11-449J21.5 | MAMDC2   | 0.26542266  | 1.85E-08    |
| RP11-449J21.5 | FHL2     | 0.355750361 | 2.00E-14    |
| RP11-449J21.5 | FTCDNL1  | 0.504695235 | 0           |
| RP11-449J21.5 | PKIA     | 0.532467512 | 0           |
| RP11-449J21.5 | DNAJB4   | 0.491638559 | 0           |
| RP11-449J21.5 | SLC25A33 | 0.566098798 | 0           |
| RP11-449J21.5 | EYA2     | 0.327879365 | 2.46E-12    |
| RP11-449J21.5 | LPAR1    | 0.239174706 | 4.30E-07    |
| RP11-449J21.5 | STX11    | 0.207350142 | 1.24E-05    |
| RP11-449J21.5 | ARHGEF28 | 0.423993311 | 0           |
| RP11-449J21.5 | OR2W3    | 0.589851695 | 0           |
| RP11-449J21.5 | ALDH1B1  | 0.437887266 | 5.44E-22    |
| RP11-449J21.5 | CXCL12   | 0.22736251  | 1.59E-06    |
| RP11-449J21.5 | OLFM2    | 0.634766408 | 0           |
| RP11-449J21.5 | TUB      | 0.514478734 | 0           |
| RP11-449J21.5 | HTRA3    | 0.305173226 | 8.12E-11    |
| RP11-449J21.5 | CKB      | 0.527675545 | 0           |
| RP11-449J21.5 | RGS2     | 0.091879115 | 0.054420818 |
| RP11-449J21.5 | SHANK2   | 0.709496847 | 0           |
| RP11-449J21.5 | CNTFR    | 0.663362648 | 5.36E-57    |
| RP11-449J21.5 | CYTH3    | 0.607909689 | 0           |
| RP11-449J21.5 | PLAC9    | 0.435447794 | 0           |
| RP11-449J21.5 | WWOX     | 0.709649606 | 0           |
| RP11-449J21.5 | NPR3     | 0.494135318 | 0           |
| RP11-449J21.5 | SDC2     | 0.479469075 | 0           |
| RP11-449J21.5 | KLF15    | 0.611101167 | 0           |
| RP11-449J21.5 | TMEM164  | 0.566028872 | 0           |
| RP11-449J21.5 | LONRF3   | 0.240467268 | 3.71E-07    |
| RP11-449J21.5 | GBP1     | 0.20298014  | 1.90E-05    |
| RP11-449J21.5 | ARHGAP6  | 0.430668876 | 0           |
| RP11-449J21.5 | TMEM119  | 0.147896414 | 0.001907946 |
| RP11-449J21.5 | SH3RF1   | 0.457889265 | 0           |
| RP11-449J21.5 | CRELD2   | 0.555364848 | 0           |
| RP11-449J21.5 | PCP4     | 0.092816233 | 0.051997486 |
| RP11-449J21.5 | GCSH     | 0.681523586 | 0           |
| RP11-449J21.5 | IMPA2    | 0.588949753 | 0           |
| RP11-449J21.5 | C1R      | 0.039955378 | 0.40351103  |



|               |          |             |             |
|---------------|----------|-------------|-------------|
| RP11-449J21.5 | SUCNR1   | 0.398668575 | 0           |
| RP11-449J21.5 | SFRP1    | 0.474655549 | 0           |
| RP11-449J21.5 | UGT8     | 0.477742634 | 0           |
| RP11-449J21.5 | TLE4     | 0.304885722 | 8.47E-11    |
| RP11-449J21.5 | ANTXR1   | 0.40429029  | 0           |
| RP11-449J21.5 | GPX3     | 0.344945776 | 1.41E-13    |
| RP11-449J21.5 | DPY19L2  | 0.649084299 | 0           |
| RP11-449J21.5 | FAM46C   | 0.464419446 | 0           |
| RP11-449J21.5 | IL33     | 0.254880057 | 6.14E-08    |
| RP11-449J21.5 | PEG3     | 0.638350916 | 0           |
| RP11-449J21.5 | FAHD2A   | 0.646487262 | 0           |
| RP11-449J21.5 | PTGDS    | 0.138895855 | 0.003570237 |
| RP11-449J21.5 | CHCHD10  | 0.388408786 | 0           |
| RP11-449J21.5 | CD36     | 0.614582843 | 0           |
| RP11-449J21.5 | ANKRD37  | 0.588548637 | 0           |
| RP11-449J21.5 | TSPAN33  | 0.534851653 | 0           |
| RP11-449J21.5 | PRDM16   | 0.679603679 | 0           |
| RP11-449J21.5 | UST      | 0.673318308 | 0           |
| RP11-449J21.5 | NEXN     | 0.548290012 | 0           |
| RP11-449J21.5 | NUPR1L   | 0.291635897 | 4.70E-10    |
| RP11-449J21.5 | SLC24A3  | 0.549829512 | 0           |
| RP11-449J21.5 | MARC1    | 0.691895284 | 0           |
| RP11-449J21.5 | MYH11    | 0.375974492 | 2.37E-16    |
| RP11-449J21.5 | APOA1    | 0.593321336 | 4.28E-43    |
| RP11-449J21.5 | TMEM178B | 0.440284724 | 0           |
| RP11-449J21.5 | CAPN6    | 0.3583034   | 9.60E-15    |
| RP11-449J21.5 | PPM1L    | 0.594980526 | 0           |
| RP11-449J21.5 | FZD8     | 0.627006783 | 0           |
| RP11-449J21.5 | RCAN2    | 0.623687794 | 0           |
| RP11-449J21.5 | COPZ2    | 0.554874659 | 0           |
| RP11-449J21.5 | GAS1     | 0.224471869 | 2.16E-06    |
| RP11-449J21.5 | DACT1    | 0.470348664 | 0           |
| RP11-449J21.5 | WBSCR17  | 0.623092645 | 0           |
| RP11-449J21.5 | NCS1     | 0.500982364 | 0           |
| RP11-449J21.5 | SPIRE2   | 0.562026229 | 0           |
| RP11-449J21.5 | C15orf52 | 0.311497176 | 3.16E-11    |
| RP11-449J21.5 | SPAG5    | 0.501484609 | 0           |
| RP11-449J21.5 | ARL4D    | 0.452992622 | 0           |
| RP11-449J21.5 | FAM189A2 | 0.607137103 | 0           |
| RP11-449J21.5 | MAP1LC3A | 0.683273431 | 0           |
| RP11-449J21.5 | KLF6     | 0.041509771 | 0.38545645  |
| RP11-449J21.5 | ADD3     | 0.384726269 | 0           |
| RP11-449J21.5 | TSPAN7   | 0.59864347  | 0           |
| RP11-449J21.5 | KLF9     | 0.441996273 | 0           |
| RP11-449J21.5 | KCNQ1    | 0.662016584 | 0           |
| RP11-449J21.5 | MAN1A1   | 0.147113331 | 0.002017628 |
| RP11-449J21.5 | MLF1     | 0.37693941  | 1.78E-16    |
| RP11-449J21.5 | RARB     | 0.686096273 | 0           |
| RP11-449J21.5 | CDC42EP2 | 0.488057455 | 0           |
| RP11-449J21.5 | FAM3B    | 0.281221047 | 2.37E-09    |
| RP11-449J21.5 | GADD45B  | 0.276241713 | 4.59E-09    |

|               |          |              |             |
|---------------|----------|--------------|-------------|
| RP11-449J21.5 | TMEM47   | 0.552168406  | 0           |
| RP11-449J21.5 | SDF2L1   | 0.495124065  | 0           |
| RP11-449J21.5 | CCDC85A  | 0.312441244  | 2.74E-11    |
| RP11-449J21.5 | CRYBG3   | 0.132210787  | 0.005560753 |
| RP11-449J21.5 | FBLN2    | 0.070972747  | 0.137587415 |
| RP11-449J21.5 | PEBP4    | 0.281641878  | 2.24E-09    |
| RP11-449J21.5 | CDADC1   | 0.720847222  | 0           |
| RP11-449J21.5 | FAM63A   | 0.570707228  | 0           |
| RP11-449J21.5 | GLUL     | 0.381440611  | 2.72E-17    |
| RP11-449J21.5 | FREM2    | 0.417304414  | 0           |
| RP11-449J21.5 | ACKR3    | 0.613398219  | 0           |
| RP11-449J21.5 | DENND6A  | 0.673138317  | 0           |
| RP11-449J21.5 | CLDN8    | 0.099736608  | 0.036746565 |
| RP11-449J21.5 | UTS2R    | 0.242110591  | 2.82E-07    |
| RP11-449J21.5 | SCNN1B   | 0.5176122    | 0           |
| RP11-449J21.5 | TTC30A   | 0.581887257  | 0           |
| RP11-449J21.5 | CORO2B   | 0.68095099   | 0           |
| RP11-449J21.5 | TC2N     | 0.183558665  | 0.000112645 |
| RP11-449J21.5 | ALDH2    | 0.601714669  | 0           |
| RP11-449J21.5 | GPR183   | 0.024027777  | 0.6154825   |
| RP11-449J21.5 | C4orf47  | 0.596046574  | 0           |
| RP11-449J21.5 | SLC25A42 | 0.805044012  | 0           |
| RP11-449J21.5 | LGMN     | 0.493943129  | 0           |
| RP11-449J21.5 | ACSF2    | 0.661071665  | 0           |
| RP11-449J21.5 | KIAA1467 | 0.626932318  | 0           |
| RP11-449J21.5 | PRKG1    | 0.651624744  | 0           |
| RP11-449J21.5 | GNAI1    | 0.623908209  | 0           |
| RP11-449J21.5 | ABCC4    | 0.32818318   | 2.34E-12    |
| RP11-449J21.5 | PRPS1    | 0.616666572  | 0           |
| RP11-449J21.5 | TSPAN5   | 0.305248967  | 8.03E-11    |
| RP11-449J21.5 | CR2      | 0.230573594  | 1.04E-06    |
| RP11-449J21.5 | CCDC170  | 0.469245455  | 0           |
| RP11-449J21.5 | RRAD     | 0.016145888  | 0.735752268 |
| RP11-449J21.5 | SCGB2A1  | 0.564419446  | 0           |
| RP11-449J21.5 | SESN3    | 0.259741091  | 3.77E-08    |
| RP11-449J21.5 | SGK223   | 0.365954975  | 2.64E-15    |
| RP11-449J21.5 | NDRG2    | 0.754710269  | 0           |
| RP11-449J21.5 | C3orf52  | 0.219957194  | 3.47E-06    |
| RP11-449J21.5 | FLRT3    | -0.318184797 | 1.14E-11    |
| RP11-449J21.5 | MST1R    | -0.657499071 | 0           |
| RP11-449J21.5 | SDC1     | -0.375729823 | 2.55E-16    |
| RP11-449J21.5 | ST8SIA4  | -0.583839503 | 0           |
| RP11-449J21.5 | UBTD1    | -0.244280701 | 2.40E-07    |
| RP11-449J21.5 | EPHA2    | -0.373069526 | 5.19E-16    |
| RP11-449J21.5 | TMEM130  | -0.127234006 | 0.007639885 |
| RP11-449J21.5 | SPINK2   | -0.449793627 | 0           |
| RP11-449J21.5 | MMP16    | -0.611358459 | 0           |
| RP11-449J21.5 | SIGLEC15 | -0.507248728 | 0           |
| RP11-449J21.5 | RIN1     | -0.449348542 | 0           |
| RP11-449J21.5 | IL1RN    | -0.609186933 | 0           |
| RP11-449J21.5 | FCER1G   | -0.309592871 | 4.21E-11    |

|               |          |              |             |
|---------------|----------|--------------|-------------|
| RP11-449J21.5 | CD276    | -0.604437516 | 0           |
| RP11-449J21.5 | CTSB     | -0.47539764  | 0           |
| RP11-449J21.5 | FAM171A2 | -0.001774383 | 0.970417013 |
| RP11-449J21.5 | ASPHD1   | -0.492535395 | 0           |
| RP11-449J21.5 | C15orf48 | -0.498848566 | 0           |
| RP11-449J21.5 | DYSF     | -0.074490592 | 0.119094615 |
| RP11-449J21.5 | PDZRN4   | -0.047587492 | 0.319706044 |
| RP11-449J21.5 | EFHD2    | -0.178345016 | 0.000176457 |
| RP11-449J21.5 | ASF1B    | -0.342052866 | 2.33E-13    |
| RP11-449J21.5 | AQP1     | -0.051590562 | 0.280655274 |
| RP11-449J21.5 | ARRDC2   | -0.384302601 | 0           |
| RP11-449J21.5 | PRSS1    | -0.407967755 | 4.91E-19    |
| RP11-449J21.5 | MAPK13   | -0.570620991 | 0           |
| RP11-449J21.5 | CST5     | -0.570397872 | 2.99E-39    |
| RP11-449J21.5 | AHR      | -0.528635498 | 0           |
| RP11-449J21.5 | BAX      | -0.411273215 | 0           |
| RP11-449J21.5 | C1orf115 | -0.18352817  | 0.000112945 |
| RP11-449J21.5 | PLK3     | -0.435014482 | 0           |
| RP11-449J21.5 | JAG2     | -0.125958039 | 0.008274288 |
| RP11-449J21.5 | RAD23B   | -0.523713183 | 0           |
| RP11-449J21.5 | CA12     | 0.211571357  | 8.17E-06    |
| RP11-449J21.5 | ADTRP    | -0.274205925 | 6.00E-09    |
| RP11-449J21.5 | UCP2     | -0.283883047 | 1.65E-09    |
| RP11-449J21.5 | IGFBP2   | -0.182977559 | 0.000118495 |
| RP11-449J21.5 | LOXL2    | -0.212181398 | 7.69E-06    |
| RP11-449J21.5 | GPX1     | -0.383632988 | 0           |
| RP11-449J21.5 | P3H3     | -0.349176494 | 6.67E-14    |
| RP11-449J21.5 | C2orf81  | -0.229894445 | 1.21E-06    |
| RP11-449J21.5 | CDT1     | -0.408851488 | 0           |
| RP11-449J21.5 | SNX25    | -0.257175682 | 5.17E-08    |
| RP11-449J21.5 | MTHFD1L  | -0.544752735 | 0           |
| RP11-449J21.5 | CDC42BPG | -0.571540613 | 1.96E-39    |
| RP11-449J21.5 | MSN      | -0.565661231 | 0           |
| RP11-449J21.5 | SIGLEC6  | -0.377570425 | 2.53E-16    |
| RP11-449J21.5 | F2R      | -0.165144376 | 0.000520737 |
| RP11-449J21.5 | TMEM184A | -0.562125089 | 0           |
| RP11-449J21.5 | CKS2     | -0.281754781 | 2.20E-09    |
| RP11-449J21.5 | TAX1BP3  | -0.534326004 | 0           |
| RP11-449J21.5 | PMEPA1   | -0.433636108 | 0           |
| RP11-449J21.5 | CXCL16   | -0.566130002 | 0           |
| RP11-449J21.5 | FAXC     | -0.669830817 | 0           |
| RP11-449J21.5 | VTCN1    | -0.612930684 | 1.23E-46    |
| RP11-449J21.5 | SH2D4A   | -0.471262804 | 0           |
| RP11-449J21.5 | RNF24    | -0.417496036 | 0           |
| RP11-449J21.5 | LY6G6C   | -0.528256271 | 6.42E-33    |
| RP11-449J21.5 | NID1     | -0.325577915 | 3.56E-12    |
| RP11-449J21.5 | STAC     | -0.721001682 | 0           |
| RP11-449J21.5 | RAB34    | -0.444732027 | 0           |
| RP11-449J21.5 | HES4     | -0.253205094 | 8.36E-08    |
| RP11-449J21.5 | EPHA10   | -0.588365809 | 0           |
| RP11-449J21.5 | ENTPD2   | -0.368179265 | 1.64E-15    |

|               |          |              |             |
|---------------|----------|--------------|-------------|
| RP11-449J21.5 | DDB2     | -0.500403243 | 0           |
| RP11-449J21.5 | NKAIN4   | -0.246475347 | 1.86E-07    |
| RP11-449J21.5 | TRIM29   | -0.439663052 | 0           |
| RP11-449J21.5 | ADCY8    | -0.652737183 | 1.19E-54    |
| RP11-449J21.5 | SFTA2    | -0.440842144 | 0           |
| RP11-449J21.5 | NRIP1    | -0.484234945 | 0           |
| RP11-449J21.5 | VWA1     | 0.017033079  | 0.72181809  |
| RP11-449J21.5 | APLNR    | -0.052034512 | 0.276532517 |
| RP11-449J21.5 | REN      | -0.388029505 | 3.18E-17    |
| RP11-449J21.5 | EDIL3    | -0.159832859 | 0.000787569 |
| RP11-449J21.5 | AGRN     | -0.36033865  | 8.29E-15    |
| RP11-449J21.5 | TREM1    | -0.520551917 | 0           |
| RP11-449J21.5 | SRL      | -0.318518965 | 1.08E-11    |
| RP11-449J21.5 | RASGRF1  | -0.440092393 | 0           |
| RP11-449J21.5 | RMI2     | -0.42688225  | 0           |
| RP11-449J21.5 | SAMD1    | -0.375747553 | 2.53E-16    |
| RP11-449J21.5 | MGAT4B   | -0.651125052 | 0           |
| RP11-449J21.5 | NXN      | -0.557839338 | 0           |
| RP11-449J21.5 | SH3BGRL3 | -0.491674586 | 0           |
| RP11-449J21.5 | CA11     | -0.195770842 | 3.75E-05    |
| RP11-449J21.5 | PLD3     | -0.142320229 | 0.002824448 |
| RP11-449J21.5 | LURAP1L  | -0.568948164 | 0           |
| RP11-449J21.5 | CARNS1   | -0.142923887 | 0.002708752 |
| RP11-449J21.5 | PDLIM7   | -0.358664972 | 1.15E-14    |
| RP11-449J21.5 | BCL2L1   | -0.666868406 | 0           |
| RP11-449J21.5 | GGT6     | -0.127553281 | 0.007488105 |
| RP11-449J21.5 | DPYSL3   | -0.361098897 | 7.13E-15    |
| RP11-449J21.5 | FYN      | -0.422540048 | 0           |
| RP11-449J21.5 | TK1      | -0.350398562 | 5.36E-14    |
| RP11-449J21.5 | AK1      | -0.167967219 | 0.000415852 |
| RP11-449J21.5 | HIGD1B   | 0.084221328  | 0.077950563 |
| RP11-449J21.5 | TMEM59L  | -0.332782391 | 1.11E-12    |
| RP11-449J21.5 | MEGF9    | -0.427792419 | 0           |
| RP11-449J21.5 | ZFP36L1  | -0.503667199 | 0           |
| RP11-449J21.5 | ADRA1B   | -0.339175416 | 3.81E-13    |
| RP11-449J21.5 | EPHA4    | -0.56336432  | 0           |
| RP11-449J21.5 | TCERG1L  | -0.103453592 | 0.030256289 |
| RP11-449J21.5 | NGFR     | -0.184116227 | 0.000107288 |
| RP11-449J21.5 | EBI3     | -0.514328387 | 0           |
| RP11-449J21.5 | S100A10  | -0.582273621 | 0           |
| RP11-449J21.5 | S100B    | -0.441775007 | 0           |
| RP11-449J21.5 | CD44     | -0.131895909 | 0.005675389 |
| RP11-449J21.5 | BHLHE41  | -0.43237163  | 0           |
| RP11-449J21.5 | FBX02    | -0.329435885 | 1.91E-12    |
| RP11-449J21.5 | SLC30A2  | -0.524437403 | 0           |
| RP11-449J21.5 | FRMD5    | -0.658165847 | 0           |
| RP11-449J21.5 | SAMD11   | -0.206817685 | 1.31E-05    |
| RP11-449J21.5 | SIPA1L2  | -0.431895909 | 0           |
| RP11-449J21.5 | S100A16  | -0.620944947 | 0           |
| RP11-449J21.5 | PPL      | -0.684239767 | 0           |
| RP11-449J21.5 | ARHGD1B  | -0.114125134 | 0.016789399 |

|               |          |              |             |
|---------------|----------|--------------|-------------|
| RP11-449J21.5 | CDC42EP3 | -0.589966725 | 0           |
| RP11-449J21.5 | RUNX2    | -0.390830939 | 0           |
| RP11-449J21.5 | LAMC2    | -0.602095785 | 0           |
| RP11-449J21.5 | BRINP1   | -0.425183608 | 0           |
| RP11-449J21.5 | GPRC5B   | -0.44129815  | 0           |
| RP11-449J21.5 | AQP5     | -0.061137477 | 0.200984009 |
| RP11-449J21.5 | PLAG1    | -0.237631518 | 5.12E-07    |
| RP11-449J21.5 | PTPRU    | -0.527444634 | 0           |
| RP11-449J21.5 | ANGPTL4  | -0.512831863 | 0           |
| RP11-449J21.5 | PALM3    | -0.309761657 | 4.10E-11    |
| RP11-449J21.5 | ACP5     | -0.378497775 | 1.06E-16    |
| RP11-449J21.5 | DLG4     | -0.155382435 | 0.001103327 |
| RP11-449J21.5 | ETNK2    | -0.353341115 | 3.13E-14    |
| RP11-449J21.5 | CD109    | -0.516443462 | 0           |
| RP11-449J21.5 | SNX22    | -0.298822326 | 2.05E-10    |
| RP11-449J21.5 | TMEM98   | -0.513536794 | 0           |
| RP11-449J21.5 | CTHRC1   | -0.372587563 | 5.86E-16    |
| RP11-449J21.5 | S100A2   | -0.515411455 | 0           |
| RP11-449J21.5 | C11orf80 | -0.606320546 | 0           |
| RP11-449J21.5 | SREBF1   | -0.490437482 | 0           |
| RP11-449J21.5 | PRSS22   | -0.49810463  | 0           |
| RP11-449J21.5 | CMTM3    | -0.507242346 | 0           |
| RP11-449J21.5 | RDH5     | -0.398174982 | 0           |
| RP11-449J21.5 | MYH10    | -0.585606226 | 0           |
| RP11-449J21.5 | EVPL     | -0.514357747 | 0           |
| RP11-449J21.5 | SCD      | -0.448967568 | 0           |
| RP11-449J21.5 | CD151    | -0.447927476 | 0           |
| RP11-449J21.5 | S100A4   | -0.496724839 | 0           |
| RP11-449J21.5 | BNIP1    | -0.23157408  | 1.00E-06    |
| RP11-449J21.5 | MAP3K6   | -0.581262606 | 0           |
| RP11-449J21.5 | MANEAL   | -0.405421015 | 0           |
| RP11-449J21.5 | CD207    | -0.411588953 | 2.23E-19    |
| RP11-449J21.5 | CD1A     | -0.446543771 | 6.67E-23    |
| RP11-449J21.5 | C3       | -0.389851553 | 0           |
| RP11-449J21.5 | NT5E     | -0.53045456  | 0           |
| RP11-449J21.5 | CACNG4   | -0.513588929 | 6.46E-31    |
| RP11-449J21.5 | FHOD1    | -0.345039956 | 1.39E-13    |
| RP11-449J21.5 | LEMD1    | -0.572474944 | 0           |
| RP11-449J21.5 | ATP11A   | -0.237175654 | 5.39E-07    |
| RP11-449J21.5 | PPAP2C   | -0.306668898 | 6.51E-11    |
| RP11-449J21.5 | DRAM1    | -0.536318107 | 0           |
| RP11-449J21.5 | CDA      | -0.124040543 | 0.00931619  |
| RP11-449J21.5 | CCND2    | -0.212068921 | 7.77E-06    |
| RP11-449J21.5 | LCN6     | -0.154038534 | 0.001205365 |
| RP11-449J21.5 | CDH4     | -0.442476391 | 0           |
| RP11-449J21.5 | MMP11    | -0.465917247 | 0           |
| RP11-449J21.5 | B3GAT1   | -0.360454673 | 8.10E-15    |
| RP11-449J21.5 | SPP1     | -0.251861896 | 9.82E-08    |
| RP11-449J21.5 | HLA-DQB1 | -0.426822536 | 0           |
| RP11-449J21.5 | SDC3     | -0.482439003 | 0           |
| RP11-449J21.5 | CX3CL1   | -0.40134958  | 0           |

|               |          |              |             |
|---------------|----------|--------------|-------------|
| RP11-449J21.5 | SDK1     | -0.288944788 | 8.25E-10    |
| RP11-449J21.5 | DOCK9    | -0.533009897 | 0           |
| RP11-449J21.5 | CSF2     | -0.563401899 | 3.90E-38    |
| RP11-449J21.5 | GRHL3    | -0.628873076 | 0           |
| RP11-449J21.5 | TMEM92   | -0.64751914  | 1.57E-53    |
| RP11-449J21.5 | BASP1    | -0.563750543 | 0           |
| RP11-449J21.5 | HRH1     | -0.598056548 | 0           |
| RP11-449J21.5 | ESM1     | 0.054997064  | 0.250076379 |
| RP11-449J21.5 | B4GALNT3 | -0.588026393 | 0           |
| RP11-449J21.5 | LMO3     | -0.240812074 | 3.57E-07    |
| RP11-449J21.5 | C9orf16  | -0.532860968 | 0           |
| RP11-449J21.5 | SEMA3F   | -0.102572926 | 0.031697895 |
| RP11-449J21.5 | PLA2G12B | -0.180078425 | 0.000148623 |
| RP11-449J21.5 | KLK6     | -0.383390148 | 8.05E-17    |
| RP11-449J21.5 | ST3GAL5  | -0.29795329  | 2.32E-10    |
| RP11-449J21.5 | FAM132B  | -0.109143389 | 0.022229953 |
| RP11-449J21.5 | CDKN1A   | -0.318622648 | 1.06E-11    |
| RP11-449J21.5 | E2F1     | -0.42823339  | 0           |
| RP11-449J21.5 | B3GNT8   | -0.336764184 | 5.71E-13    |
| RP11-449J21.5 | MTMR11   | -0.546484992 | 0           |
| RP11-449J21.5 | MYO1G    | -0.502235211 | 0           |
| RP11-449J21.5 | TMSB10   | -0.474928159 | 0           |
| RP11-449J21.5 | UNC5CL   | -0.649891495 | 0           |
| RP11-449J21.5 | ABR      | -0.563906138 | 0           |
| RP11-449J21.5 | PLP2     | -0.558656462 | 0           |
| RP11-449J21.5 | SRCIN1   | -0.398577657 | 0           |
| RP11-449J21.5 | PDE9A    | -0.63162812  | 0           |
| RP11-449J21.5 | TREM2    | -0.247036597 | 1.74E-07    |
| RP11-449J21.5 | KDEL3    | -0.468111183 | 0           |
| RP11-449J21.5 | PC       | -0.510385031 | 0           |
| RP11-449J21.5 | C2CD4A   | -0.679790904 | 0           |
| RP11-449J21.5 | PELI1    | -0.537666836 | 0           |
| RP11-449J21.5 | SSX1     | -0.274372442 | 5.87E-09    |
| RP11-449J21.5 | MROH6    | -0.486659792 | 0           |
| RP11-449J21.5 | ESPN     | -0.352493213 | 3.66E-14    |
| RP11-449J21.5 | BMP1     | -0.306049921 | 7.13E-11    |
| RP11-449J21.5 | TM4SF4   | -0.473335806 | 6.79E-26    |
| RP11-449J21.5 | CORO2A   | -0.531317639 | 0           |
| RP11-449J21.5 | CD164L2  | -0.460778929 | 1.85E-24    |
| RP11-449J21.5 | CTSS     | -0.482706224 | 0           |
| RP11-449J21.5 | CLU      | -0.477397969 | 0           |
| RP11-449J21.5 | TMSB4X   | -0.49492606  | 0           |
| RP11-449J21.5 | WNT10A   | -0.401821274 | 1.83E-18    |
| RP11-449J21.5 | NAPSA    | -0.399010686 | 0           |
| RP11-449J21.5 | PLEKHA4  | -0.405759722 | 0           |
| RP11-449J21.5 | SFTPA1   | -0.040090079 | 0.402074254 |
| RP11-449J21.5 | C1orf116 | -0.550184814 | 0           |
| RP11-449J21.5 | TM4SF1   | -0.533769152 | 0           |
| RP11-449J21.5 | SEL1L3   | -0.504690838 | 0           |
| RP11-449J21.5 | VASN     | -0.568499533 | 0           |
| RP11-449J21.5 | NPTXR    | -0.652605406 | 0           |

|               |          |              |             |
|---------------|----------|--------------|-------------|
| RP11-449J21.5 | PDE4C    | -0.525996619 | 0           |
| RP11-449J21.5 | CDC42EP1 | -0.598958206 | 0           |
| RP11-449J21.5 | ENDOD1   | -0.637024456 | 0           |
| RP11-449J21.5 | RYR1     | -0.450213607 | 0           |
| RP11-449J21.5 | IL1RAP   | -0.562023534 | 0           |
| RP11-449J21.5 | SLC35F2  | -0.597993522 | 6.44E-44    |
| RP11-449J21.5 | ISYNA1   | -0.245878497 | 1.99E-07    |
| RP11-449J21.5 | HLA-G    | -0.54701291  | 0           |
| RP11-449J21.5 | CDKN2B   | -0.594241129 | 0           |
| RP11-449J21.5 | ALDH1A3  | -0.50725582  | 0           |
| RP11-449J21.5 | CLIP3    | -0.32497681  | 3.91E-12    |
| RP11-449J21.5 | ULBP2    | -0.452024441 | 0           |
| RP11-449J21.5 | ETHE1    | -0.695093712 | 0           |
| RP11-449J21.5 | XPR1     | -0.49214818  | 0           |
| RP11-449J21.5 | SPTBN2   | -0.641736711 | 0           |
| RP11-449J21.5 | IVL      | -0.571564587 | 1.94E-39    |
| RP11-449J21.5 | MARCO    | -0.465441808 | 0           |
| RP11-449J21.5 | PLXND1   | -0.135200005 | 0.004571937 |
| RP11-449J21.5 | EMILIN2  | -0.46570208  | 0           |
| RP11-449J21.5 | PLAUR    | -0.566606717 | 0           |
| RP11-449J21.5 | CDC42EP5 | -0.459856262 | 0           |
| RP11-449J21.5 | TRPC5    | -0.208719943 | 1.04E-05    |
| RP11-449J21.5 | TMEM100  | -0.37469427  | 3.40E-16    |
| RP11-449J21.5 | QSOX1    | -0.619585155 | 0           |
| RP11-449J21.5 | ARHGAP23 | -0.383286196 | 1.87E-18    |
| RP11-449J21.5 | MDF1     | -0.291985918 | 5.40E-10    |
| RP11-449J21.5 | FSTL3    | -0.55442617  | 0           |
| RP11-449J21.5 | INF2     | -0.455275348 | 0           |
| RP11-449J21.5 | TGFBR1   | -0.545073713 | 0           |
| RP11-449J21.5 | TGFBI    | -0.30250456  | 1.20E-10    |
| RP11-449J21.5 | ERBB3    | -0.637976466 | 0           |
| RP11-449J21.5 | CCL18    | -0.339800066 | 3.42E-13    |
| RP11-449J21.5 | CCL17    | -0.541978278 | 6.98E-35    |
| RP11-449J21.5 | C16orf45 | -0.312309335 | 2.80E-11    |
| RP11-449J21.5 | PRDM1    | -0.199023026 | 2.77E-05    |
| RP11-449J21.5 | TRIM47   | -0.592220375 | 0           |
| RP11-449J21.5 | CNFN     | -0.494974569 | 0           |
| RP11-449J21.5 | ARMCX3   | -0.326125549 | 3.26E-12    |
| RP11-449J21.5 | RAMP1    | -0.264743261 | 2.02E-08    |
| RP11-449J21.5 | GABRD    | 0.049702     | 0.298657082 |
| RP11-449J21.5 | COL13A1  | -0.148753961 | 0.00179412  |
| RP11-449J21.5 | S100A5   | -0.445228457 | 0           |
| RP11-449J21.5 | MISP     | -0.526644247 | 0           |
| RP11-449J21.5 | HES6     | -0.207867564 | 1.18E-05    |
| RP11-449J21.5 | PSD3     | -0.584028714 | 0           |
| RP11-449J21.5 | DOK7     | -0.484126723 | 0           |
| RP11-449J21.5 | ZMAT3    | -0.559362102 | 0           |
| RP11-449J21.5 | MFAP2    | -0.222189143 | 2.75E-06    |
| RP11-449J21.5 | TMEM79   | -0.483991694 | 0           |
| RP11-449J21.5 | SLC1A5   | -0.419000786 | 0           |
| RP11-449J21.5 | BBC3     | -0.467205553 | 0           |

|               |           |              |             |
|---------------|-----------|--------------|-------------|
| RP11-449J21.5 | HLA-DQB2  | -0.416895072 | 0           |
| RP11-449J21.5 | C1QL1     | -0.317704394 | 1.22E-11    |
| RP11-449J21.5 | TMEM215   | -0.120266674 | 0.011674221 |
| RP11-449J21.5 | PNP       | -0.449438892 | 0           |
| RP11-449J21.5 | ARNTL     | -0.516855925 | 0           |
| RP11-449J21.5 | CLDN2     | -0.193176081 | 4.61E-05    |
| RP11-449J21.5 | MVP       | -0.660857207 | 0           |
| RP11-449J21.5 | LGALS1    | -0.522570826 | 0           |
| RP11-449J21.5 | BIRC7     | -0.391469483 | 1.58E-17    |
| RP11-449J21.5 | COL8A1    | -0.591711322 | 0           |
| RP11-449J21.5 | PERP      | -0.657163768 | 0           |
| RP11-449J21.5 | GJA4      | -0.13226426  | 0.005541493 |
| RP11-449J21.5 | IGFL2     | -0.456348218 | 5.75E-24    |
| RP11-449J21.5 | DAPK2     | -0.426653041 | 0           |
| RP11-449J21.5 | MAMLD1    | -0.531137222 | 0           |
| RP11-449J21.5 | ETV5      | -0.25788657  | 4.74E-08    |
| RP11-449J21.5 | RUNX1     | -0.695246612 | 0           |
| RP11-449J21.5 | LONRF2    | -0.282036895 | 2.12E-09    |
| RP11-449J21.5 | SPOCK1    | -0.122810389 | 0.010044607 |
| RP11-449J21.5 | XKRX      | -0.411810352 | 0           |
| RP11-449J21.5 | TGFB1     | -0.193823277 | 4.49E-05    |
| RP11-449J21.5 | ERP27     | -0.242356255 | 2.99E-07    |
| RP11-449J21.5 | TNFRSF10C | -0.431570392 | 0           |
| RP11-449J21.5 | PALM      | -0.505288965 | 0           |
| RP11-449J21.5 | TSC22D1   | -0.290717469 | 6.45E-10    |
| RP11-449J21.5 | TGM2      | -0.558807377 | 0           |
| RP11-449J21.5 | UBE2QL1   | -0.229748778 | 1.22E-06    |
| RP11-449J21.5 | ECE1      | -0.523061867 | 0           |
| RP11-449J21.5 | COL8A2    | -0.603155734 | 0           |
| RP11-449J21.5 | HIST3H2A  | -0.476437448 | 0           |
| RP11-449J21.5 | TNFRSF21  | -0.577285351 | 0           |
| RP11-449J21.5 | SOX4      | -0.540703143 | 0           |
| RP11-449J21.5 | ELF3      | -0.651632971 | 0           |
| RP11-449J21.5 | TPD52L1   | -0.535316169 | 0           |
| RP11-449J21.5 | INHBB     | -0.292772405 | 4.83E-10    |
| RP11-449J21.5 | HPN       | -0.379446949 | 7.38E-17    |
| RP11-449J21.5 | MMP7      | -0.477112548 | 2.45E-26    |
| RP11-449J21.5 | RAB27A    | -0.523773322 | 0           |
| RP11-449J21.5 | IGF2BP2   | -0.438265814 | 0           |
| RP11-449J21.5 | ITGB4     | -0.548500072 | 0           |
| RP11-449J21.5 | PPP1R1B   | -0.411213785 | 0           |
| RP11-449J21.5 | NPDC1     | -0.237577762 | 5.15E-07    |
| RP11-449J21.5 | CCL13     | -0.587245079 | 4.79E-42    |
| RP11-449J21.5 | SPINT1    | -0.68778527  | 0           |
| RP11-449J21.5 | HEY2      | -0.231108571 | 1.06E-06    |
| RP11-449J21.5 | CST2      | -0.583839148 | 1.81E-41    |
| RP11-449J21.5 | ADM       | -0.368752571 | 1.44E-15    |
| RP11-449J21.5 | VSTM2L    | -0.502289109 | 0           |
| RP11-449J21.5 | FAM84A    | -0.527730578 | 0           |
| RP11-449J21.5 | P4HA2     | -0.457210149 | 0           |
| RP11-449J21.5 | LPL       | -0.320846229 | 7.51E-12    |



|               |            |              |             |
|---------------|------------|--------------|-------------|
| RP11-449J21.5 | TMEM173    | -0.463913372 | 0           |
| RP11-449J21.5 | DHRS3      | -0.429785656 | 0           |
| RP11-449J21.5 | SCN1B      | -0.569555369 | 0           |
| RP11-449J21.5 | GLT1D1     | -0.213753947 | 6.56E-06    |
| RP11-449J21.5 | PHYHIP     | -0.416842876 | 0           |
| RP11-449J21.5 | BHLHE40    | -0.579813739 | 0           |
| RP11-449J21.5 | BID        | -0.512703643 | 0           |
| RP11-449J21.5 | POSTN      | -0.440167425 | 0           |
| RP11-449J21.5 | ITGA3      | -0.73730118  | 0           |
| RP11-449J21.5 | RSP04      | -0.497675289 | 0           |
| RP11-449J21.5 | ADAMTS9    | -0.113211845 | 0.017689382 |
| RP11-449J21.5 | ABTB2      | -0.695136121 | 0           |
| RP11-449J21.5 | KCNQ3      | -0.707231141 | 0           |
| RP11-449J21.5 | ANXA1      | -0.477875677 | 0           |
| RP11-449J21.5 | S100A11    | -0.587829239 | 0           |
| RP11-449J21.5 | CEACAM6    | -0.605223316 | 3.24E-45    |
| RP11-449J21.5 | IER5L      | -0.493096787 | 0           |
| RP11-449J21.5 | KRT80      | -0.616307724 | 0           |
| RP11-449J21.5 | CDH6       | -0.595282072 | 0           |
| RP11-449J21.5 | UNC5B      | -0.410329289 | 0           |
| RP11-449J21.5 | PLEKHN1    | -0.570424972 | 0           |
| RP11-449J21.5 | SYTL1      | -0.383224213 | 2.51E-18    |
| RP11-449J21.5 | TMEM163    | -0.533633839 | 0           |
| RP11-449J21.5 | C4orf48    | -0.202960141 | 1.90E-05    |
| RP11-449J21.5 | B3GNT7     | -0.347243963 | 9.41E-14    |
| RP11-449J21.5 | BAIAP3     | -0.361088969 | 7.15E-15    |
| RP11-449J21.5 | PHLDA2     | -0.534050415 | 0           |
| RP11-449J21.5 | GAP43      | -0.497385141 | 8.17E-29    |
| RP11-449J21.5 | S100A1     | -0.47245991  | 0           |
| RP11-449J21.5 | PTPRE      | -0.669678767 | 0           |
| RP11-449J21.5 | CCND1      | -0.483067909 | 0           |
| RP11-449J21.5 | ST6GALNAC5 | -0.72464812  | 1.14E-72    |
| RP11-449J21.5 | KRT17      | -0.257990537 | 4.68E-08    |
| RP11-449J21.5 | HPCAL4     | -0.256712868 | 5.47E-08    |
| RP11-449J21.5 | GABBR2     | -0.313184896 | 2.45E-11    |
| RP11-449J21.5 | DIRAS3     | -0.270811904 | 9.32E-09    |
| RP11-449J21.5 | SERINC2    | -0.487993345 | 0           |
| RP11-449J21.5 | PTCHD4     | -0.382688494 | 8.61E-18    |
| RP11-449J21.5 | EPS8       | -0.401864024 | 0           |
| RP11-449J21.5 | LY6E       | -0.472012555 | 0           |
| RP11-449J21.5 | UPP1       | -0.656134598 | 0           |
| RP11-449J21.5 | AHNAK2     | -0.689439516 | 0           |
| RP11-449J21.5 | PLXNC1     | -0.326525529 | 3.06E-12    |
| RP11-449J21.5 | TNC        | -0.606730456 | 0           |
| RP11-449J21.5 | DUSP4      | -0.394261553 | 0           |
| RP11-449J21.5 | NRCAM      | -0.422997614 | 0           |
| RP11-449J21.5 | NRP2       | -0.375925842 | 2.41E-16    |
| RP11-449J21.5 | CTSC       | -0.615792572 | 0           |
| RP11-449J21.5 | AMIGO2     | -0.313348576 | 2.39E-11    |
| RP11-449J21.5 | NAB2       | -0.371686756 | 7.30E-16    |
| RP11-449J21.5 | TBC1D2     | -0.689498095 | 0           |

|               |         |              |             |
|---------------|---------|--------------|-------------|
| RP11-449J21.5 | PHLDA3  | -0.503863218 | 0           |
| RP11-449J21.5 | PTP4A3  | -0.355346267 | 2.16E-14    |
| RP11-449J21.5 | CRABP2  | -0.240587404 | 3.66E-07    |
| RP11-449J21.5 | GOS2    | -0.384477912 | 0           |
| RP11-449J21.5 | S100A6  | -0.680924041 | 0           |
| RP11-449J21.5 | FOXQ1   | -0.541301271 | 0           |
| RP11-449J21.5 | LRG1    | -0.506436853 | 0           |
| RP11-449J21.5 | LAMP5   | -0.396283442 | 0           |
| RP11-449J21.5 | ALDH3B1 | -0.608823546 | 0           |
| RP11-449J21.5 | CDH2    | 0.075668691  | 0.113355797 |
| RP11-449J21.5 | SCG5    | -0.121672997 | 0.010762656 |
| RP11-449J21.5 | ZCCHC16 | -0.188994024 | 6.76E-05    |
| RP11-449J21.5 | GRB7    | -0.575963854 | 0           |
| RP11-449J21.5 | TIAM1   | -0.437064312 | 0           |
| RP11-449J21.5 | FXYD5   | -0.328504583 | 2.22E-12    |
| RP11-449J21.5 | CLDN9   | -0.315088067 | 1.83E-11    |
| RP11-449J21.5 | FAM43A  | -0.525893787 | 0           |
| RP11-449J21.5 | CHST2   | -0.481237784 | 0           |
| RP11-449J21.5 | HMGA2   | -0.376941963 | 1.78E-16    |
| RP11-449J21.5 | GALNT7  | -0.545062508 | 0           |
| RP11-449J21.5 | CBLN1   | -0.534095377 | 0           |
| RP11-449J21.5 | STRA6   | -0.502368255 | 0           |
| RP11-449J21.5 | MUC21   | -0.629247076 | 8.82E-50    |
| RP11-449J21.5 | PRR36   | -0.435300425 | 0           |
| RP11-449J21.5 | NFE2L3  | -0.590017077 | 0           |
| RP11-449J21.5 | NR1D1   | -0.40061302  | 0           |
| RP11-449J21.5 | MUC1    | -0.692166761 | 0           |
| RP11-449J21.5 | NAT8L   | -0.095518656 | 0.045508269 |
| RP11-449J21.5 | APOC1   | -0.090656337 | 0.057723457 |
| RP11-449J21.5 | EVA1A   | -0.652150535 | 0           |
| RP11-449J21.5 | ENTPD1  | -0.260675797 | 3.36E-08    |
| RP11-449J21.5 | COL1A1  | -0.44945492  | 0           |
| RP11-449J21.5 | FNDC4   | -0.471007923 | 0           |
| RP11-449J21.5 | FRMD3   | -0.100311333 | 0.035671687 |
| RP11-449J21.5 | SHROOM4 | -0.429239157 | 0           |
| RP11-449J21.5 | NELL2   | -0.251998769 | 9.66E-08    |
| RP11-449J21.5 | EPHB3   | -0.636291867 | 0           |
| RP11-449J21.5 | TMC6    | -0.579225825 | 0           |
| RP11-449J21.5 | NOD1    | -0.42286755  | 0           |
| RP11-449J21.5 | GGCT    | -0.568605911 | 0           |
| RP11-449J21.5 | ICAM1   | -0.554969122 | 0           |
| RP11-449J21.5 | PRSS23  | -0.530941203 | 0           |
| RP11-449J21.5 | CFI     | -0.494595722 | 0           |
| RP11-449J21.5 | CD55    | -0.678415084 | 0           |
| RP11-449J21.5 | RASD2   | -0.477257551 | 0           |
| RP11-449J21.5 | KLK11   | -0.334642623 | 6.01E-13    |
| RP11-449J21.5 | ICAM5   | -0.366018235 | 2.61E-15    |
| RP11-449J21.5 | ADORA1  | -0.496552932 | 0           |
| RP11-449J21.5 | ITGA2   | -0.601667721 | 0           |
| RP11-449J21.5 | ABCC3   | -0.362616696 | 5.27E-15    |
| RP11-449J21.5 | MFGE8   | -0.623694744 | 0           |

|               |           |              |             |
|---------------|-----------|--------------|-------------|
| RP11-449J21.5 | STK32A    | -0.376241288 | 2.20E-16    |
| RP11-449J21.5 | CYSLTR2   | -0.34966186  | 6.12E-14    |
| RP11-449J21.5 | LAD1      | -0.606722938 | 0           |
| RP11-449J21.5 | MGAT3     | -0.58229135  | 0           |
| RP11-449J21.5 | IGFBP6    | -0.435865504 | 0           |
| RP11-449J21.5 | CYP2S1    | -0.581824281 | 0           |
| RP11-449J21.5 | KCNJ2     | -0.444761104 | 0           |
| RP11-449J21.5 | FAM20A    | -0.528042761 | 0           |
| RP11-449J21.5 | TGFA      | -0.434846688 | 0           |
| RP11-449J21.5 | MXRA8     | -0.548924449 | 0           |
| RP11-449J21.5 | C8orf4    | -0.459660669 | 0           |
| RP11-449J21.5 | CLDN10    | -0.547982894 | 9.03E-36    |
| RP11-449J21.5 | PDE5A     | -0.525045033 | 0           |
| RP11-449J21.5 | APOE      | -0.069243611 | 0.147451307 |
| RP11-449J21.5 | SPOCK2    | -0.508876026 | 0           |
| RP11-449J21.5 | TENM1     | -0.138050647 | 0.003779906 |
| RP11-449J21.5 | SLIT1     | -0.15595177  | 0.001057261 |
| RP11-449J21.5 | CXCL14    | -0.235727922 | 6.34E-07    |
| RP11-449J21.5 | ECM1      | -0.145621488 | 0.002242696 |
| RP11-449J21.5 | DUSP5     | -0.659711447 | 0           |
| RP11-449J21.5 | SEZ6L2    | -0.367955304 | 1.72E-15    |
| RP11-449J21.5 | THRSP     | -0.209895409 | 9.66E-06    |
| RP11-449J21.5 | C19orf33  | -0.627638525 | 0           |
| RP11-449J21.5 | MPZL2     | -0.54113291  | 0           |
| RP11-449J21.5 | CTSH      | -0.526457731 | 0           |
| RP11-449J21.5 | CYP1B1    | -0.579631053 | 0           |
| RP11-449J21.5 | ALOX5     | -0.656449334 | 0           |
| RP11-449J21.5 | SYTL5     | -0.524711138 | 2.00E-32    |
| RP11-449J21.5 | TNFRSF12A | -0.468081256 | 0           |
| RP11-449J21.5 | DUSP6     | -0.547220134 | 0           |
| RP11-449J21.5 | ALOX15B   | -0.648934945 | 0           |
| RP11-449J21.5 | SDC4      | -0.558704119 | 0           |
| RP11-449J21.5 | MDK       | -0.388053058 | 0           |
| RP11-449J21.5 | KRT19     | -0.683335697 | 0           |
| RP11-449J21.5 | MET       | -0.697988324 | 0           |
| RP11-449J21.5 | TESC      | -0.176790197 | 0.000201255 |
| RP11-449J21.5 | CXCL17    | -0.699689047 | 8.33E-66    |
| RP11-449J21.5 | NPC2      | -0.401316107 | 0           |
| RP11-449J21.5 | COMP      | -0.435711753 | 0           |
| RP11-449J21.5 | TUSC3     | -0.404515101 | 0           |
| RP11-449J21.5 | TMPRSS4   | -0.713889968 | 0           |
| RP11-449J21.5 | LGALS3    | -0.664895168 | 0           |
| RP11-449J21.5 | CRLF1     | -0.433997084 | 0           |
| RP11-449J21.5 | CTXN1     | -0.532137457 | 0           |
| RP11-449J21.5 | PCSK1N    | -0.21169206  | 8.07E-06    |
| RP11-449J21.5 | NMU       | -0.479383474 | 1.32E-26    |
| RP11-449J21.5 | GALE      | -0.487825835 | 0           |
| RP11-449J21.5 | PCSK2     | -0.18784782  | 7.72E-05    |
| RP11-449J21.5 | GJB3      | -0.482736435 | 0           |
| RP11-449J21.5 | SLPI      | -0.656515289 | 0           |
| RP11-449J21.5 | AGR2      | -0.291587214 | 5.71E-10    |

|               |          |              |             |
|---------------|----------|--------------|-------------|
| RP11-449J21.5 | MRC2     | -0.531151264 | 0           |
| RP11-449J21.5 | GOLT1A   | -0.375520046 | 2.70E-16    |
| RP11-449J21.5 | SLC27A6  | -0.564279048 | 2.84E-38    |
| RP11-449J21.5 | KCNN4    | -0.667961261 | 0           |
| RP11-449J21.5 | ETV4     | -0.33095632  | 1.11E-12    |
| RP11-449J21.5 | SYT12    | -0.603824355 | 0           |
| RP11-449J21.5 | PVRL4    | -0.64939776  | 0           |
| RP11-449J21.5 | PLCD3    | -0.575092549 | 0           |
| RP11-449J21.5 | PLAU     | -0.618631726 | 0           |
| RP11-449J21.5 | LRRK2    | -0.181405294 | 0.000135789 |
| RP11-449J21.5 | SFN      | -0.622904853 | 0           |
| RP11-449J21.5 | LPAR5    | -0.553272608 | 0           |
| RP11-449J21.5 | NGEF     | -0.590731369 | 0           |
| RP11-449J21.5 | DTX4     | -0.580566469 | 0           |
| RP11-449J21.5 | CST6     | -0.512692012 | 0           |
| RP11-449J21.5 | QPCT     | -0.388082135 | 0           |
| RP11-449J21.5 | TIMP1    | -0.499824689 | 0           |
| RP11-449J21.5 | CAMK2N1  | -0.517442138 | 0           |
| RP11-449J21.5 | KLHDC8A  | -0.188208937 | 7.47E-05    |
| RP11-449J21.5 | PDLIM4   | -0.657091147 | 0           |
| RP11-449J21.5 | SCEL     | -0.565662649 | 0           |
| RP11-449J21.5 | LCN2     | -0.718721934 | 0           |
| RP11-449J21.5 | PROS1    | -0.713940888 | 0           |
| RP11-449J21.5 | GABRB2   | -0.641719832 | 0           |
| RP11-449J21.5 | TMPRSS6  | -0.630328608 | 0           |
| RP11-449J21.5 | KLK7     | -0.474817618 | 4.56E-26    |
| RP11-449J21.5 | PDZK1IP1 | -0.600346508 | 0           |
| RP11-449J21.5 | CDH3     | -0.417076056 | 0           |
| RP11-449J21.5 | LRP4     | -0.249377193 | 1.32E-07    |
| RP11-449J21.5 | IGSF1    | -0.348498938 | 7.53E-14    |
| RP11-449J21.5 | B3GNT3   | -0.71147817  | 0           |
| RP11-449J21.5 | CLDN1    | -0.607983587 | 0           |
| RP11-449J21.5 | GDF15    | -0.647151059 | 0           |
| RP11-449J21.5 | ARHGAP36 | -0.327684456 | 1.90E-12    |
| RP11-449J21.5 | LAMB3    | -0.660065472 | 0           |
| RP11-449J21.5 | KLK10    | -0.501443051 | 0           |
| RP11-449J21.5 | DPP4     | -0.664199173 | 0           |
| RP11-449J21.5 | METTL7B  | -0.42920384  | 0           |
| RP11-449J21.5 | LIPH     | -0.686500793 | 0           |
| RP11-449J21.5 | CLDN16   | -0.591406088 | 0           |
| RP11-449J21.5 | CHI3L1   | -0.608687666 | 0           |
| RP11-449J21.5 | SLC22A31 | -0.494479945 | 1.89E-28    |
| RP11-449J21.5 | TACSTD2  | -0.633610719 | 0           |
| RP11-449J21.5 | SFTPB    | -0.622753513 | 0           |
| RP11-449J21.5 | RXRG     | -0.290855902 | 6.32E-10    |
| RP11-449J21.5 | DCSTAMP  | -0.641012293 | 3.63E-52    |
| RP11-449J21.5 | CITED1   | -0.425492955 | 0           |
| RP11-449J21.5 | SERPINA1 | -0.627203227 | 0           |
| RP11-449J21.5 | PRR15    | -0.316956913 | 1.37E-11    |
| RP11-449J21.5 | SLC34A2  | -0.708048974 | 0           |
| RP11-449J21.5 | FN1      | -0.765885759 | 0           |

|               |           |              |             |
|---------------|-----------|--------------|-------------|
| RP11-449J21.5 | ZCCHC12   | -0.254342911 | 7.29E-08    |
| RP11-114N19.3 | TFF3      | 0.577223226  | 0           |
| RP11-114N19.3 | CCL21     | 0.327519215  | 1.95E-12    |
| RP11-114N19.3 | TPO       | 0.65742021   | 0           |
| RP11-114N19.3 | MT1G      | 0.499662995  | 0           |
| RP11-114N19.3 | DI01      | 0.539725035  | 0           |
| RP11-114N19.3 | DPT       | 0.268334459  | 1.12E-08    |
| RP11-114N19.3 | CDH16     | 0.544867765  | 0           |
| RP11-114N19.3 | CRABP1    | 0.542130835  | 6.63E-35    |
| RP11-114N19.3 | SLC26A7   | 0.690455496  | 0           |
| RP11-114N19.3 | MT1H      | 0.461221226  | 1.65E-24    |
| RP11-114N19.3 | SLC26A4   | 0.690331956  | 0           |
| RP11-114N19.3 | SLC5A8    | 0.550532607  | 3.74E-36    |
| RP11-114N19.3 | PKHD1L1   | 0.576022141  | 3.64E-40    |
| RP11-114N19.3 | TFCP2L1   | 0.581963707  | 0           |
| RP11-114N19.3 | WSCD2     | 0.608861225  | 6.98E-46    |
| RP11-114N19.3 | IPCEF1    | 0.576995719  | 0           |
| RP11-114N19.3 | SLC5A5    | 0.438813896  | 4.35E-22    |
| RP11-114N19.3 | MT1F      | 0.512978949  | 0           |
| RP11-114N19.3 | FOSB      | 0.364595041  | 3.51E-15    |
| RP11-114N19.3 | SEMA3D    | 0.584870112  | 1.21E-41    |
| RP11-114N19.3 | BMP8A     | 0.634091973  | 0           |
| RP11-114N19.3 | MATN2     | 0.632282273  | 0           |
| RP11-114N19.3 | PLA2R1    | 0.547141273  | 0           |
| RP11-114N19.3 | COL23A1   | 0.635938692  | 0           |
| RP11-114N19.3 | HGD       | 0.655981697  | 0           |
| RP11-114N19.3 | TCEAL2    | 0.455301305  | 0           |
| RP11-114N19.3 | CHRD1     | 0.318526352  | 8.28E-12    |
| RP11-114N19.3 | TNFRSF11B | 0.508656604  | 0           |
| RP11-114N19.3 | FAM167A   | 0.67441244   | 0           |
| RP11-114N19.3 | KIT       | 0.607613534  | 0           |
| RP11-114N19.3 | SLC4A4    | 0.666126882  | 0           |
| RP11-114N19.3 | SMOC2     | 0.395016978  | 0           |
| RP11-114N19.3 | FHL1      | 0.692648865  | 0           |
| RP11-114N19.3 | OTOS      | 0.517791482  | 0           |
| RP11-114N19.3 | IGFBPL1   | 0.58856333   | 2.85E-42    |
| RP11-114N19.3 | HBB       | 0.313225036  | 2.43E-11    |
| RP11-114N19.3 | BEX1      | 0.523725239  | 0           |
| RP11-114N19.3 | FABP4     | 0.494669831  | 1.79E-28    |
| RP11-114N19.3 | LMOD1     | 0.59019565   | 0           |
| RP11-114N19.3 | SOD3      | 0.485277164  | 0           |
| RP11-114N19.3 | TMEM171   | 0.474394994  | 0           |
| RP11-114N19.3 | PI16      | 0.318609883  | 1.06E-11    |
| RP11-114N19.3 | ZMAT4     | 0.600804225  | 2.03E-44    |
| RP11-114N19.3 | MFAP4     | 0.234557057  | 7.22E-07    |
| RP11-114N19.3 | CWH43     | 0.504295981  | 1.07E-29    |
| RP11-114N19.3 | SPX       | 0.698776513  | 0           |
| RP11-114N19.3 | APOD      | 0.169470267  | 0.000368387 |
| RP11-114N19.3 | DPP6      | 0.555580298  | 0           |
| RP11-114N19.3 | MMRN1     | 0.461005001  | 0           |
| RP11-114N19.3 | WDR72     | 0.612640383  | 0           |

|               |            |             |             |
|---------------|------------|-------------|-------------|
| RP11-114N19.3 | MPPED2     | 0.69147417  | 0           |
| RP11-114N19.3 | PAPSS2     | 0.465835407 | 0           |
| RP11-114N19.3 | DCN        | 0.13789803  | 0.003818934 |
| RP11-114N19.3 | SORBS2     | 0.667482277 | 0           |
| RP11-114N19.3 | EGR2       | 0.426108103 | 0           |
| RP11-114N19.3 | EDN3       | 0.568167156 | 6.83E-39    |
| RP11-114N19.3 | DIO2       | 0.675298213 | 0           |
| RP11-114N19.3 | ITPR1      | 0.709344656 | 0           |
| RP11-114N19.3 | CFD        | 0.190942139 | 5.84E-05    |
| RP11-114N19.3 | CPXM1      | 0.40678251  | 0           |
| RP11-114N19.3 | ELMO1      | 0.675327573 | 0           |
| RP11-114N19.3 | GPC3       | 0.483113668 | 4.71E-27    |
| RP11-114N19.3 | MYOC       | 0.294106846 | 3.30E-10    |
| RP11-114N19.3 | DEPTOR     | 0.6320064   | 0           |
| RP11-114N19.3 | DGKI       | 0.604475529 | 0           |
| RP11-114N19.3 | CARTPT     | 0.546255112 | 1.63E-35    |
| RP11-114N19.3 | IYD        | 0.589643053 | 0           |
| RP11-114N19.3 | LYVE1      | 0.438654164 | 0           |
| RP11-114N19.3 | CLCNKB     | 0.620555463 | 0           |
| RP11-114N19.3 | NCAM1      | 0.346437902 | 1.09E-13    |
| RP11-114N19.3 | HBA2       | 0.274177557 | 6.02E-09    |
| RP11-114N19.3 | GLT8D2     | 0.489185344 | 0           |
| RP11-114N19.3 | OGDHL      | 0.496392656 | 0           |
| RP11-114N19.3 | LIFR       | 0.580975386 | 0           |
| RP11-114N19.3 | CSGALNACT1 | 0.457825296 | 0           |
| RP11-114N19.3 | RAP1GAP    | 0.512230616 | 0           |
| RP11-114N19.3 | COL9A3     | 0.591839117 | 0           |
| RP11-114N19.3 | FBLN1      | 0.125151978 | 0.008698893 |
| RP11-114N19.3 | EFEMP1     | 0.40583291  | 0           |
| RP11-114N19.3 | AOX1       | 0.428773592 | 4.65E-21    |
| RP11-114N19.3 | GRIN2C     | 0.537202319 | 0           |
| RP11-114N19.3 | C11orf74   | 0.572305024 | 0           |
| RP11-114N19.3 | PPARGC1A   | 0.582823523 | 0           |
| RP11-114N19.3 | ANGPTL1    | 0.600315871 | 0           |
| RP11-114N19.3 | SCARA5     | 0.251010187 | 9.83E-08    |
| RP11-114N19.3 | LTF        | 0.469568843 | 0           |
| RP11-114N19.3 | CA4        | 0.593195858 | 4.50E-43    |
| RP11-114N19.3 | TG         | 0.672833509 | 0           |
| RP11-114N19.3 | FCGBP      | 0.531203176 | 0           |
| RP11-114N19.3 | PBX4       | 0.687047717 | 0           |
| RP11-114N19.3 | CYR61      | 0.408031669 | 0           |
| RP11-114N19.3 | FOS        | 0.401610986 | 0           |
| RP11-114N19.3 | KHDRBS2    | 0.693711083 | 0           |
| RP11-114N19.3 | MUM1L1     | 0.527368325 | 0           |
| RP11-114N19.3 | RGS16      | 0.635051359 | 0           |
| RP11-114N19.3 | MT1M       | 0.403441111 | 0           |
| RP11-114N19.3 | LRP2       | 0.593900294 | 0           |
| RP11-114N19.3 | MAFB       | 0.494573311 | 0           |
| RP11-114N19.3 | KCNK2      | 0.54101093  | 0           |
| RP11-114N19.3 | TBC1D4     | 0.646663991 | 0           |
| RP11-114N19.3 | MIOX       | 0.625540776 | 4.74E-49    |

|               |          |             |             |
|---------------|----------|-------------|-------------|
| RP11-114N19.3 | TPPP     | 0.544578417 | 0           |
| RP11-114N19.3 | FMOD     | 0.483823759 | 0           |
| RP11-114N19.3 | CITED2   | 0.443253091 | 0           |
| RP11-114N19.3 | RGS8     | 0.601046563 | 1.84E-44    |
| RP11-114N19.3 | ABI3BP   | 0.37856458  | 1.03E-16    |
| RP11-114N19.3 | ADH1B    | 0.310913566 | 2.71E-11    |
| RP11-114N19.3 | OGN      | 0.192404421 | 4.95E-05    |
| RP11-114N19.3 | NR4A1    | 0.391540124 | 0           |
| RP11-114N19.3 | FOXJ1    | 0.609806738 | 4.67E-46    |
| RP11-114N19.3 | ALDH1A1  | 0.601179234 | 0           |
| RP11-114N19.3 | OCA2     | 0.466029126 | 4.72E-25    |
| RP11-114N19.3 | TMEM139  | 0.375681598 | 2.58E-16    |
| RP11-114N19.3 | ARHGAP24 | 0.622453385 | 0           |
| RP11-114N19.3 | SLC25A15 | 0.623335045 | 0           |
| RP11-114N19.3 | DES      | 0.175103051 | 0.000227021 |
| RP11-114N19.3 | GDF10    | 0.436571884 | 7.44E-22    |
| RP11-114N19.3 | KIAA1324 | 0.562422805 | 0           |
| RP11-114N19.3 | JUN      | 0.438723097 | 0           |
| RP11-114N19.3 | C7       | 0.080127909 | 0.093578682 |
| RP11-114N19.3 | LGI3     | 0.593173946 | 0           |
| RP11-114N19.3 | CDON     | 0.681935765 | 0           |
| RP11-114N19.3 | BCL2     | 0.59375945  | 0           |
| RP11-114N19.3 | HLF      | 0.652163867 | 0           |
| RP11-114N19.3 | EGR1     | 0.456015455 | 0           |
| RP11-114N19.3 | IP6K3    | 0.541487645 | 0           |
| RP11-114N19.3 | SCUBE3   | 0.576309795 | 0           |
| RP11-114N19.3 | PKNOX2   | 0.615836399 | 0           |
| RP11-114N19.3 | SMAD9    | 0.503605216 | 0           |
| RP11-114N19.3 | IQGAP2   | 0.603785633 | 0           |
| RP11-114N19.3 | GNA14    | 0.653053753 | 0           |
| RP11-114N19.3 | LAYN     | 0.533744472 | 0           |
| RP11-114N19.3 | AVPR1A   | 0.61305398  | 0           |
| RP11-114N19.3 | PDLIM3   | 0.456447916 | 0           |
| RP11-114N19.3 | GPM6A    | 0.506918106 | 0           |
| RP11-114N19.3 | SDPR     | 0.535998831 | 0           |
| RP11-114N19.3 | CRYAB    | 0.169138935 | 0.000378394 |
| RP11-114N19.3 | FOXA2    | 0.501836085 | 2.22E-29    |
| RP11-114N19.3 | C8orf88  | 0.561460015 | 0           |
| RP11-114N19.3 | ISM1     | 0.527003237 | 0           |
| RP11-114N19.3 | BMP2     | 0.312942638 | 2.54E-11    |
| RP11-114N19.3 | ID4      | 0.567668935 | 0           |
| RP11-114N19.3 | NUPR1    | 0.270967358 | 9.14E-09    |
| RP11-114N19.3 | SERTM1   | 0.421359239 | 2.54E-20    |
| RP11-114N19.3 | IRS1     | 0.65603361  | 0           |
| RP11-114N19.3 | FIBIN    | 0.222261338 | 2.73E-06    |
| RP11-114N19.3 | PODN     | 0.189382498 | 6.72E-05    |
| RP11-114N19.3 | TDRD9    | 0.403479265 | 0           |
| RP11-114N19.3 | EPHA3    | 0.399549383 | 0           |
| RP11-114N19.3 | AIF1L    | 0.463967412 | 0           |
| RP11-114N19.3 | EBF4     | 0.607587719 | 0           |
| RP11-114N19.3 | ADM2     | 0.502095644 | 0           |

|               |          |             |             |
|---------------|----------|-------------|-------------|
| RP11-114N19.3 | GSTM3    | 0.541874576 | 0           |
| RP11-114N19.3 | HSD17B6  | 0.501205616 | 0           |
| RP11-114N19.3 | AGR3     | 0.359963121 | 7.08E-15    |
| RP11-114N19.3 | EPHB1    | 0.43867161  | 0           |
| RP11-114N19.3 | TMOD1    | 0.321415847 | 6.87E-12    |
| RP11-114N19.3 | WASF3    | 0.675088435 | 0           |
| RP11-114N19.3 | SELV     | 0.595781237 | 1.58E-43    |
| RP11-114N19.3 | ENPP1    | 0.322720323 | 5.60E-12    |
| RP11-114N19.3 | SYNE1    | 0.685054575 | 4.21E-62    |
| RP11-114N19.3 | PLCH1    | 0.573795448 | 0           |
| RP11-114N19.3 | CCDC146  | 0.717606669 | 0           |
| RP11-114N19.3 | SLC16A2  | 0.616130711 | 0           |
| RP11-114N19.3 | IER2     | 0.465796259 | 0           |
| RP11-114N19.3 | KCNAB1   | 0.615793848 | 0           |
| RP11-114N19.3 | SYNDIG1  | 0.456515856 | 0           |
| RP11-114N19.3 | C16orf89 | 0.664313352 | 0           |
| RP11-114N19.3 | CTGF     | 0.317059177 | 1.35E-11    |
| RP11-114N19.3 | NR4A3    | 0.210883872 | 8.75E-06    |
| RP11-114N19.3 | KIAA1456 | 0.71780751  | 0           |
| RP11-114N19.3 | AQP4     | 0.531533089 | 0           |
| RP11-114N19.3 | RNF150   | 0.610542896 | 0           |
| RP11-114N19.3 | C1S      | 0.045079812 | 0.345893503 |
| RP11-114N19.3 | PFKFB2   | 0.541934999 | 0           |
| RP11-114N19.3 | PROX1    | 0.595890553 | 0           |
| RP11-114N19.3 | TCF7L1   | 0.667374481 | 0           |
| RP11-114N19.3 | HSPB6    | 0.320101584 | 8.44E-12    |
| RP11-114N19.3 | FHDC1    | 0.556845769 | 0           |
| RP11-114N19.3 | PRR15L   | 0.454419078 | 0           |
| RP11-114N19.3 | SLC1A1   | 0.426295611 | 0           |
| RP11-114N19.3 | BTBD11   | 0.691110783 | 0           |
| RP11-114N19.3 | TRIM58   | 0.578589118 | 0           |
| RP11-114N19.3 | LRIG1    | 0.521225359 | 0           |
| RP11-114N19.3 | ROR2     | 0.357423755 | 1.46E-14    |
| RP11-114N19.3 | GPR125   | 0.650360692 | 0           |
| RP11-114N19.3 | FLRT1    | 0.684178494 | 0           |
| RP11-114N19.3 | PGF      | 0.543834624 | 0           |
| RP11-114N19.3 | DUSP1    | 0.361813756 | 6.19E-15    |
| RP11-114N19.3 | PLA2G7   | 0.426256181 | 0           |
| RP11-114N19.3 | PLSCR4   | 0.509242533 | 0           |
| RP11-114N19.3 | FAM46B   | 0.281538763 | 2.27E-09    |
| RP11-114N19.3 | GLDC     | 0.518911003 | 0           |
| RP11-114N19.3 | ZBTB16   | 0.499355634 | 0           |
| RP11-114N19.3 | OMD      | 0.14585694  | 0.002185967 |
| RP11-114N19.3 | HSD11B2  | 0.608695325 | 0           |
| RP11-114N19.3 | FGL2     | 0.156330475 | 0.00102761  |
| RP11-114N19.3 | CLCNKA   | 0.667646832 | 5.69E-58    |
| RP11-114N19.3 | GATM     | 0.56622092  | 0           |
| RP11-114N19.3 | TNS3     | 0.469761458 | 0           |
| RP11-114N19.3 | TOB1     | 0.388537432 | 0           |
| RP11-114N19.3 | MARC2    | 0.651091153 | 0           |
| RP11-114N19.3 | LRRC2    | 0.596488822 | 0           |



|               |          |              |             |
|---------------|----------|--------------|-------------|
| RP11-114N19.3 | SORD     | 0.464631777  | 0           |
| RP11-114N19.3 | RIMS4    | 0.501098245  | 0           |
| RP11-114N19.3 | SLC29A4  | 0.571127066  | 0           |
| RP11-114N19.3 | SLC39A14 | 0.663285742  | 0           |
| RP11-114N19.3 | FAXDC2   | 0.703159989  | 0           |
| RP11-114N19.3 | HSPB8    | 0.244550617  | 2.32E-07    |
| RP11-114N19.3 | CCL19    | -0.068009043 | 0.154871747 |
| RP11-114N19.3 | KCNIP3   | 0.634352528  | 0           |
| RP11-114N19.3 | CGNL1    | 0.552570089  | 0           |
| RP11-114N19.3 | ATF3     | 0.144116879  | 0.002492716 |
| RP11-114N19.3 | SGCD     | 0.290142603  | 6.98E-10    |
| RP11-114N19.3 | STARD13  | 0.610275958  | 0           |
| RP11-114N19.3 | LDHD     | 0.635915289  | 0           |
| RP11-114N19.3 | RCAN1    | 0.387530389  | 0           |
| RP11-114N19.3 | ID3      | 0.380236556  | 5.23E-17    |
| RP11-114N19.3 | SYTL3    | 0.634880729  | 0           |
| RP11-114N19.3 | MT1E     | 0.361238323  | 6.94E-15    |
| RP11-114N19.3 | CAMK1D   | 0.593191392  | 0           |
| RP11-114N19.3 | PRKCQ    | 0.626453334  | 0           |
| RP11-114N19.3 | NUAK2    | 0.447143684  | 0           |
| RP11-114N19.3 | LIPG     | 0.682338582  | 0           |
| RP11-114N19.3 | SLC25A25 | 0.350726206  | 5.05E-14    |
| RP11-114N19.3 | PRKX     | 0.333282934  | 1.02E-12    |
| RP11-114N19.3 | SRPX     | 0.200349203  | 2.44E-05    |
| RP11-114N19.3 | FAM189A1 | 0.552935178  | 0           |
| RP11-114N19.3 | PLEKHH1  | 0.763816639  | 0           |
| RP11-114N19.3 | WNT11    | 0.436409166  | 0           |
| RP11-114N19.3 | SNAI1    | 0.374708028  | 3.38E-16    |
| RP11-114N19.3 | FDCSP    | 0.027009807  | 0.572476638 |
| RP11-114N19.3 | MT1X     | 0.343683142  | 1.76E-13    |
| RP11-114N19.3 | ACACB    | 0.720536882  | 0           |
| RP11-114N19.3 | ARC      | 0.230390307  | 1.14E-06    |
| RP11-114N19.3 | KLK4     | 0.156170708  | 0.001027174 |
| RP11-114N19.3 | ZFPM2    | 0.383611996  | 0           |
| RP11-114N19.3 | AKAP12   | 0.410449425  | 0           |
| RP11-114N19.3 | GJB6     | 0.426020082  | 8.77E-21    |
| RP11-114N19.3 | ERO1LB   | 0.696867385  | 0           |
| RP11-114N19.3 | DNALI1   | 0.623220582  | 0           |
| RP11-114N19.3 | HKDC1    | 0.328047016  | 2.39E-12    |
| RP11-114N19.3 | ZFP36L2  | 0.521480099  | 0           |
| RP11-114N19.3 | CAPSL    | 0.613073535  | 1.15E-46    |
| RP11-114N19.3 | CYP7B1   | 0.540718745  | 0           |
| RP11-114N19.3 | CPQ      | 0.58629754   | 0           |
| RP11-114N19.3 | RPS6KA6  | 0.69218182   | 7.05E-64    |
| RP11-114N19.3 | TLE1     | 0.45800472   | 0           |
| RP11-114N19.3 | TP53INP2 | 0.660945571  | 0           |
| RP11-114N19.3 | KATNAL2  | 0.70812826   | 0           |
| RP11-114N19.3 | SGPP2    | 0.266777347  | 1.56E-08    |
| RP11-114N19.3 | CTH      | 0.570037757  | 0           |
| RP11-114N19.3 | KIF12    | 0.483547886  | 0           |
| RP11-114N19.3 | TMEM220  | 0.636356119  | 0           |

|               |          |             |             |
|---------------|----------|-------------|-------------|
| RP11-114N19.3 | CENPJ    | 0.610847136 | 0           |
| RP11-114N19.3 | FAM155B  | 0.512451031 | 0           |
| RP11-114N19.3 | WFS1     | 0.50373599  | 0           |
| RP11-114N19.3 | SELENBP1 | 0.595134703 | 0           |
| RP11-114N19.3 | SNTA1    | 0.421919227 | 0           |
| RP11-114N19.3 | FRAS1    | 0.286607029 | 1.14E-09    |
| RP11-114N19.3 | FBLN7    | 0.56049609  | 0           |
| RP11-114N19.3 | AGPAT9   | 0.61655679  | 0           |
| RP11-114N19.3 | GPR83    | 0.546392656 | 0           |
| RP11-114N19.3 | PRTG     | 0.63640789  | 0           |
| RP11-114N19.3 | EGR3     | 0.25154106  | 1.02E-07    |
| RP11-114N19.3 | GRAMD2   | 0.415333729 | 0           |
| RP11-114N19.3 | HYOU1    | 0.584923989 | 0           |
| RP11-114N19.3 | FBLN5    | 0.303226227 | 1.08E-10    |
| RP11-114N19.3 | ITM2A    | 0.550666067 | 0           |
| RP11-114N19.3 | SRF      | 0.458329669 | 0           |
| RP11-114N19.3 | FGFR2    | 0.533550155 | 0           |
| RP11-114N19.3 | MT1A     | 0.155715616 | 0.001063031 |
| RP11-114N19.3 | MAMDC2   | 0.331114811 | 1.45E-12    |
| RP11-114N19.3 | FHL2     | 0.277739088 | 3.77E-09    |
| RP11-114N19.3 | FTCDNL1  | 0.468861218 | 0           |
| RP11-114N19.3 | PKIA     | 0.462591024 | 0           |
| RP11-114N19.3 | DNAJB4   | 0.58724175  | 0           |
| RP11-114N19.3 | SLC25A33 | 0.482950468 | 0           |
| RP11-114N19.3 | EYA2     | 0.298442061 | 2.16E-10    |
| RP11-114N19.3 | LPAR1    | 0.204849553 | 1.58E-05    |
| RP11-114N19.3 | STX11    | 0.244583524 | 2.31E-07    |
| RP11-114N19.3 | ARHGEF28 | 0.469437219 | 0           |
| RP11-114N19.3 | OR2W3    | 0.554640911 | 0           |
| RP11-114N19.3 | ALDH1B1  | 0.399796478 | 2.81E-18    |
| RP11-114N19.3 | CXCL12   | 0.177427613 | 0.000190718 |
| RP11-114N19.3 | OLFM2    | 0.499106993 | 0           |
| RP11-114N19.3 | TUB      | 0.588728203 | 0           |
| RP11-114N19.3 | HTRA3    | 0.263841318 | 2.26E-08    |
| RP11-114N19.3 | CKB      | 0.39288162  | 0           |
| RP11-114N19.3 | RGS2     | 0.083627314 | 0.080077341 |
| RP11-114N19.3 | SHANK2   | 0.706800239 | 0           |
| RP11-114N19.3 | CNTFR    | 0.523526425 | 2.91E-32    |
| RP11-114N19.3 | CYTH3    | 0.608234922 | 0           |
| RP11-114N19.3 | PLAC9    | 0.326078459 | 3.28E-12    |
| RP11-114N19.3 | WWOX     | 0.6234088   | 0           |
| RP11-114N19.3 | NPR3     | 0.479458721 | 0           |
| RP11-114N19.3 | SDC2     | 0.483056278 | 0           |
| RP11-114N19.3 | KLF15    | 0.624608317 | 0           |
| RP11-114N19.3 | TMEM164  | 0.572736208 | 0           |
| RP11-114N19.3 | LONRF3   | 0.427998082 | 0           |
| RP11-114N19.3 | GBP1     | 0.202370524 | 2.01E-05    |
| RP11-114N19.3 | ARHGAP6  | 0.535663528 | 0           |
| RP11-114N19.3 | TMEM119  | 0.091373891 | 0.055765821 |
| RP11-114N19.3 | SH3RF1   | 0.527385488 | 0           |
| RP11-114N19.3 | CRELD2   | 0.506134314 | 0           |

|               |          |             |             |
|---------------|----------|-------------|-------------|
| RP11-114N19.3 | PCP4     | 0.103378986 | 0.030376199 |
| RP11-114N19.3 | GCSH     | 0.642954241 | 0           |
| RP11-114N19.3 | IMPA2    | 0.549475912 | 0           |
| RP11-114N19.3 | C1R      | 0.002388963 | 0.960177552 |
| RP11-114N19.3 | SUCNR1   | 0.401313979 | 0           |
| RP11-114N19.3 | SFRP1    | 0.399900572 | 0           |
| RP11-114N19.3 | UGT8     | 0.51845684  | 0           |
| RP11-114N19.3 | TLE4     | 0.28438359  | 1.54E-09    |
| RP11-114N19.3 | ANTXR1   | 0.429053634 | 0           |
| RP11-114N19.3 | GPX3     | 0.415638962 | 0           |
| RP11-114N19.3 | DPY19L2  | 0.690025729 | 0           |
| RP11-114N19.3 | FAM46C   | 0.425518911 | 0           |
| RP11-114N19.3 | IL33     | 0.276786236 | 3.67E-09    |
| RP11-114N19.3 | PEG3     | 0.625611956 | 0           |
| RP11-114N19.3 | FAHD2A   | 0.638872168 | 0           |
| RP11-114N19.3 | PTGDS    | 0.011182014 | 0.815201086 |
| RP11-114N19.3 | CHCHD10  | 0.295810415 | 3.15E-10    |
| RP11-114N19.3 | CD36     | 0.57778632  | 0           |
| RP11-114N19.3 | ANKRD37  | 0.500907758 | 0           |
| RP11-114N19.3 | TSPAN33  | 0.397068085 | 0           |
| RP11-114N19.3 | PRDM16   | 0.647772022 | 0           |
| RP11-114N19.3 | UST      | 0.657112423 | 0           |
| RP11-114N19.3 | NEXN     | 0.573404545 | 0           |
| RP11-114N19.3 | NUPR1L   | 0.23695738  | 5.10E-07    |
| RP11-114N19.3 | SLC24A3  | 0.480473708 | 0           |
| RP11-114N19.3 | MARC1    | 0.660704732 | 0           |
| RP11-114N19.3 | MYH11    | 0.328775917 | 2.13E-12    |
| RP11-114N19.3 | APOA1    | 0.480739527 | 9.07E-27    |
| RP11-114N19.3 | TMEM178B | 0.444931025 | 0           |
| RP11-114N19.3 | CAPN6    | 0.285909535 | 1.05E-09    |
| RP11-114N19.3 | PPM1L    | 0.616805856 | 0           |
| RP11-114N19.3 | FZD8     | 0.607886996 | 0           |
| RP11-114N19.3 | RCAN2    | 0.579027962 | 0           |
| RP11-114N19.3 | COPZ2    | 0.450551321 | 0           |
| RP11-114N19.3 | GAS1     | 0.245761197 | 2.02E-07    |
| RP11-114N19.3 | DACT1    | 0.474683774 | 0           |
| RP11-114N19.3 | WBSCR17  | 0.582139443 | 0           |
| RP11-114N19.3 | NCS1     | 0.345951826 | 1.18E-13    |
| RP11-114N19.3 | SPIRE2   | 0.549495769 | 0           |
| RP11-114N19.3 | C15orf52 | 0.437757328 | 0           |
| RP11-114N19.3 | SPAG5    | 0.510005759 | 0           |
| RP11-114N19.3 | ARL4D    | 0.432106962 | 0           |
| RP11-114N19.3 | FAM189A2 | 0.53346406  | 0           |
| RP11-114N19.3 | MAP1LC3A | 0.525473523 | 0           |
| RP11-114N19.3 | KLF6     | 0.113979751 | 0.016929925 |
| RP11-114N19.3 | ADD3     | 0.504696369 | 0           |
| RP11-114N19.3 | TSPAN7   | 0.478723012 | 0           |
| RP11-114N19.3 | KLF9     | 0.454580772 | 0           |
| RP11-114N19.3 | KCNQ1    | 0.578855062 | 0           |
| RP11-114N19.3 | MAN1A1   | 0.184993206 | 9.93E-05    |
| RP11-114N19.3 | MLF1     | 0.391654729 | 0           |

|               |          |              |             |
|---------------|----------|--------------|-------------|
| RP11-114N19.3 | RARB     | 0.627803482  | 0           |
| RP11-114N19.3 | CDC42EP2 | 0.38411722   | 0           |
| RP11-114N19.3 | FAM3B    | 0.226078317  | 1.82E-06    |
| RP11-114N19.3 | GADD45B  | 0.188785505  | 7.09E-05    |
| RP11-114N19.3 | TMEM47   | 0.542210305  | 0           |
| RP11-114N19.3 | SDF2L1   | 0.414328954  | 0           |
| RP11-114N19.3 | CCDC85A  | 0.461368388  | 0           |
| RP11-114N19.3 | CRYBG3   | 0.292418805  | 5.08E-10    |
| RP11-114N19.3 | FBLN2    | 0.060358933  | 0.206788229 |
| RP11-114N19.3 | PEBP4    | 0.265095159  | 1.93E-08    |
| RP11-114N19.3 | CDADC1   | 0.706838819  | 0           |
| RP11-114N19.3 | FAM63A   | 0.650237152  | 0           |
| RP11-114N19.3 | GLUL     | 0.439436396  | 0           |
| RP11-114N19.3 | FREM2    | 0.527796957  | 0           |
| RP11-114N19.3 | ACKR3    | 0.600599262  | 0           |
| RP11-114N19.3 | DENND6A  | 0.66625723   | 0           |
| RP11-114N19.3 | CLDN8    | 0.16981408   | 0.000358264 |
| RP11-114N19.3 | UTS2R    | 0.211916339  | 7.52E-06    |
| RP11-114N19.3 | SCNN1B   | 0.417145131  | 0           |
| RP11-114N19.3 | TTC30A   | 0.597111487  | 0           |
| RP11-114N19.3 | CORO2B   | 0.603720955  | 0           |
| RP11-114N19.3 | TC2N     | 0.270696591  | 9.46E-09    |
| RP11-114N19.3 | ALDH2    | 0.501237387  | 0           |
| RP11-114N19.3 | GPR183   | 0.005981981  | 0.900499811 |
| RP11-114N19.3 | C4orf47  | 0.598771123  | 0           |
| RP11-114N19.3 | SLC25A42 | 0.701676089  | 0           |
| RP11-114N19.3 | LGMN     | 0.448989978  | 0           |
| RP11-114N19.3 | ACSF2    | 0.532244119  | 0           |
| RP11-114N19.3 | KIAA1467 | 0.590862285  | 0           |
| RP11-114N19.3 | PRKG1    | 0.622464165  | 0           |
| RP11-114N19.3 | GNAI1    | 0.652681005  | 0           |
| RP11-114N19.3 | ABCC4    | 0.339148183  | 3.82E-13    |
| RP11-114N19.3 | PRPS1    | 0.559616557  | 0           |
| RP11-114N19.3 | TSPAN5   | 0.347530899  | 8.95E-14    |
| RP11-114N19.3 | CR2      | 0.214766836  | 5.62E-06    |
| RP11-114N19.3 | CCDC170  | 0.51072544   | 0           |
| RP11-114N19.3 | RRAD     | -0.044843937 | 0.348424984 |
| RP11-114N19.3 | SCGB2A1  | 0.41747093   | 0           |
| RP11-114N19.3 | SESN3    | 0.324940783  | 3.94E-12    |
| RP11-114N19.3 | SGK223   | 0.268116431  | 1.32E-08    |
| RP11-114N19.3 | NDRG2    | 0.651925865  | 0           |
| RP11-114N19.3 | C3orf52  | 0.363607713  | 4.31E-15    |
| RP11-114N19.3 | FLRT3    | -0.218487194 | 4.04E-06    |
| RP11-114N19.3 | MST1R    | -0.50658408  | 0           |
| RP11-114N19.3 | SDC1     | -0.44061407  | 0           |
| RP11-114N19.3 | ST8SIA4  | -0.50876596  | 0           |
| RP11-114N19.3 | UBTD1    | -0.401268024 | 0           |
| RP11-114N19.3 | EPHA2    | -0.350218713 | 5.53E-14    |
| RP11-114N19.3 | TMEM130  | -0.200243676 | 2.47E-05    |
| RP11-114N19.3 | SPINK2   | -0.506761092 | 0           |
| RP11-114N19.3 | MMP16    | -0.453811447 | 0           |

|               |          |              |             |
|---------------|----------|--------------|-------------|
| RP11-114N19.3 | SIGLEC15 | -0.508310947 | 0           |
| RP11-114N19.3 | RIN1     | -0.540804415 | 0           |
| RP11-114N19.3 | IL1RN    | -0.561528948 | 0           |
| RP11-114N19.3 | FCER1G   | -0.361982543 | 5.98E-15    |
| RP11-114N19.3 | CD276    | -0.594137446 | 0           |
| RP11-114N19.3 | CTSB     | -0.444220137 | 0           |
| RP11-114N19.3 | FAM171A2 | -0.056031198 | 0.241270718 |
| RP11-114N19.3 | ASPHD1   | -0.514449941 | 0           |
| RP11-114N19.3 | C15orf48 | -0.473663256 | 0           |
| RP11-114N19.3 | DYSF     | -0.083593415 | 0.080200116 |
| RP11-114N19.3 | PDZRN4   | -0.098545886 | 0.039061289 |
| RP11-114N19.3 | EFHD2    | -0.219169005 | 3.77E-06    |
| RP11-114N19.3 | ASF1B    | -0.419768125 | 0           |
| RP11-114N19.3 | AQP1     | -0.142414408 | 0.002806107 |
| RP11-114N19.3 | ARRDC2   | -0.36408542  | 3.90E-15    |
| RP11-114N19.3 | PRSS1    | -0.343876677 | 1.25E-13    |
| RP11-114N19.3 | MAPK13   | -0.452297194 | 0           |
| RP11-114N19.3 | CST5     | -0.572781368 | 1.23E-39    |
| RP11-114N19.3 | AHR      | -0.456121549 | 0           |
| RP11-114N19.3 | BAX      | -0.525943997 | 0           |
| RP11-114N19.3 | C1orf115 | -0.146515062 | 0.00210528  |
| RP11-114N19.3 | PLK3     | -0.427613704 | 0           |
| RP11-114N19.3 | JAG2     | -0.220087684 | 3.42E-06    |
| RP11-114N19.3 | RAD23B   | -0.417527382 | 0           |
| RP11-114N19.3 | CA12     | 0.208720856  | 1.08E-05    |
| RP11-114N19.3 | ADTRP    | -0.222129429 | 2.77E-06    |
| RP11-114N19.3 | UCP2     | -0.33272211  | 1.12E-12    |
| RP11-114N19.3 | IGFBP2   | -0.299361591 | 1.89E-10    |
| RP11-114N19.3 | LOXL2    | -0.179832462 | 0.000155442 |
| RP11-114N19.3 | GPX1     | -0.515741794 | 0           |
| RP11-114N19.3 | P3H3     | -0.453171053 | 0           |
| RP11-114N19.3 | C2orf81  | -0.305386549 | 7.87E-11    |
| RP11-114N19.3 | CDT1     | -0.514092512 | 0           |
| RP11-114N19.3 | SNX25    | -0.165151893 | 0.000520428 |
| RP11-114N19.3 | MTHFD1L  | -0.5605046   | 0           |
| RP11-114N19.3 | CDC42BPG | -0.480096367 | 1.08E-26    |
| RP11-114N19.3 | MSN      | -0.444813583 | 0           |
| RP11-114N19.3 | SIGLEC6  | -0.391211302 | 1.66E-17    |
| RP11-114N19.3 | F2R      | -0.117900271 | 0.013480945 |
| RP11-114N19.3 | TMEM184A | -0.446516764 | 0           |
| RP11-114N19.3 | CKS2     | -0.318493009 | 1.08E-11    |
| RP11-114N19.3 | TAX1BP3  | -0.62558827  | 0           |
| RP11-114N19.3 | PMEPA1   | -0.472219354 | 0           |
| RP11-114N19.3 | CXCL16   | -0.569534661 | 0           |
| RP11-114N19.3 | FAXC     | -0.548476244 | 0           |
| RP11-114N19.3 | VTCN1    | -0.557713449 | 3.00E-37    |
| RP11-114N19.3 | SH2D4A   | -0.412678112 | 0           |
| RP11-114N19.3 | RNF24    | -0.330437965 | 1.62E-12    |
| RP11-114N19.3 | LY6G6C   | -0.502437862 | 1.86E-29    |
| RP11-114N19.3 | NID1     | -0.215663216 | 5.40E-06    |
| RP11-114N19.3 | STAC     | -0.605311517 | 0           |

|               |          |              |             |
|---------------|----------|--------------|-------------|
| RP11-114N19.3 | RAB34    | -0.500159709 | 0           |
| RP11-114N19.3 | HES4     | -0.296368544 | 2.91E-10    |
| RP11-114N19.3 | EPHA10   | -0.521548039 | 0           |
| RP11-114N19.3 | ENTPD2   | -0.381958601 | 1.86E-17    |
| RP11-114N19.3 | DDB2     | -0.545827861 | 0           |
| RP11-114N19.3 | NKAIN4   | -0.244474593 | 2.34E-07    |
| RP11-114N19.3 | TRIM29   | -0.457865294 | 0           |
| RP11-114N19.3 | ADCY8    | -0.547903471 | 9.28E-36    |
| RP11-114N19.3 | SFTA2    | -0.439298956 | 0           |
| RP11-114N19.3 | NRIP1    | -0.357464037 | 1.45E-14    |
| RP11-114N19.3 | VWA1     | -0.116977195 | 0.014231841 |
| RP11-114N19.3 | APLNR    | -0.14024813  | 0.003256643 |
| RP11-114N19.3 | REN      | -0.386943599 | 3.95E-17    |
| RP11-114N19.3 | EDIL3    | -0.111373352 | 0.019629742 |
| RP11-114N19.3 | AGRN     | -0.374504208 | 3.58E-16    |
| RP11-114N19.3 | TREM1    | -0.470728646 | 0           |
| RP11-114N19.3 | SRL      | -0.23201491  | 9.56E-07    |
| RP11-114N19.3 | RASGRF1  | -0.421208906 | 0           |
| RP11-114N19.3 | RMI2     | -0.480072876 | 0           |
| RP11-114N19.3 | SAMD1    | -0.499901991 | 0           |
| RP11-114N19.3 | MGAT4B   | -0.567496745 | 0           |
| RP11-114N19.3 | NXN      | -0.586930276 | 0           |
| RP11-114N19.3 | SH3BGRL3 | -0.577077276 | 0           |
| RP11-114N19.3 | CA11     | -0.243016507 | 2.77E-07    |
| RP11-114N19.3 | PLD3     | -0.204389008 | 1.66E-05    |
| RP11-114N19.3 | LURAP1L  | -0.460747992 | 0           |
| RP11-114N19.3 | CARNS1   | -0.139474976 | 0.003432728 |
| RP11-114N19.3 | PDLIM7   | -0.407716365 | 0           |
| RP11-114N19.3 | BCL2L1   | -0.686091876 | 0           |
| RP11-114N19.3 | GGT6     | -0.228350264 | 1.42E-06    |
| RP11-114N19.3 | DPYSL3   | -0.288816    | 8.39E-10    |
| RP11-114N19.3 | FYN      | -0.445813535 | 0           |
| RP11-114N19.3 | TK1      | -0.434346996 | 0           |
| RP11-114N19.3 | AK1      | -0.249119759 | 1.36E-07    |
| RP11-114N19.3 | HIGD1B   | -0.011819146 | 0.804877671 |
| RP11-114N19.3 | TMEM59L  | -0.414404128 | 0           |
| RP11-114N19.3 | MEGF9    | -0.315807039 | 1.64E-11    |
| RP11-114N19.3 | ZFP36L1  | -0.362968453 | 4.90E-15    |
| RP11-114N19.3 | ADRA1B   | -0.293367696 | 4.45E-10    |
| RP11-114N19.3 | EPHA4    | -0.459866475 | 0           |
| RP11-114N19.3 | TCERG1L  | -0.047310484 | 0.322533549 |
| RP11-114N19.3 | NGFR     | -0.269492251 | 1.10E-08    |
| RP11-114N19.3 | EBI3     | -0.568125509 | 0           |
| RP11-114N19.3 | S100A10  | -0.605485551 | 0           |
| RP11-114N19.3 | S100B    | -0.445850555 | 0           |
| RP11-114N19.3 | CD44     | -0.10691683  | 0.025119153 |
| RP11-114N19.3 | BHLHE41  | -0.342805879 | 2.04E-13    |
| RP11-114N19.3 | FBX02    | -0.420006553 | 0           |
| RP11-114N19.3 | SLC30A2  | -0.443717608 | 0           |
| RP11-114N19.3 | FRMD5    | -0.575790955 | 0           |
| RP11-114N19.3 | SAMD11   | -0.303546212 | 1.03E-10    |

|               |          |              |             |
|---------------|----------|--------------|-------------|
| RP11-114N19.3 | SIPA1L2  | -0.267892896 | 1.36E-08    |
| RP11-114N19.3 | S100A16  | -0.627222801 | 0           |
| RP11-114N19.3 | PPL      | -0.568614705 | 0           |
| RP11-114N19.3 | ARHGDIB  | -0.221056715 | 3.09E-06    |
| RP11-114N19.3 | CDC42EP3 | -0.552399884 | 0           |
| RP11-114N19.3 | RUNX2    | -0.363085326 | 4.79E-15    |
| RP11-114N19.3 | LAMC2    | -0.549057067 | 0           |
| RP11-114N19.3 | BRINP1   | -0.436975522 | 0           |
| RP11-114N19.3 | GPRC5B   | -0.35675471  | 1.65E-14    |
| RP11-114N19.3 | AQP5     | -0.104590275 | 0.028478955 |
| RP11-114N19.3 | PLAG1    | -0.150013333 | 0.001638209 |
| RP11-114N19.3 | PTPRU    | -0.565744063 | 0           |
| RP11-114N19.3 | ANGPTL4  | -0.483865884 | 0           |
| RP11-114N19.3 | PALM3    | -0.279565666 | 2.95E-09    |
| RP11-114N19.3 | ACP5     | -0.447686353 | 0           |
| RP11-114N19.3 | DLG4     | -0.117014782 | 0.014200561 |
| RP11-114N19.3 | ETNK2    | -0.365416987 | 2.96E-15    |
| RP11-114N19.3 | CD109    | -0.453125381 | 0           |
| RP11-114N19.3 | SNX22    | -0.176543259 | 0.000205481 |
| RP11-114N19.3 | TMEM98   | -0.481488269 | 0           |
| RP11-114N19.3 | CTHRC1   | -0.377532573 | 1.47E-16    |
| RP11-114N19.3 | S100A2   | -0.531206013 | 0           |
| RP11-114N19.3 | C11orf80 | -0.59484266  | 0           |
| RP11-114N19.3 | SREBF1   | -0.410728561 | 0           |
| RP11-114N19.3 | PRSS22   | -0.460467864 | 0           |
| RP11-114N19.3 | CMTM3    | -0.540008141 | 0           |
| RP11-114N19.3 | RDH5     | -0.335863802 | 6.64E-13    |
| RP11-114N19.3 | MYH10    | -0.422218503 | 0           |
| RP11-114N19.3 | EVPL     | -0.464350372 | 0           |
| RP11-114N19.3 | SCD      | -0.429542689 | 0           |
| RP11-114N19.3 | CD151    | -0.445694676 | 0           |
| RP11-114N19.3 | S100A4   | -0.519879467 | 0           |
| RP11-114N19.3 | BNIP1    | -0.269550972 | 1.10E-08    |
| RP11-114N19.3 | MAP3K6   | -0.505958578 | 0           |
| RP11-114N19.3 | MANEAL   | -0.387349688 | 0           |
| RP11-114N19.3 | CD207    | -0.41167831  | 2.19E-19    |
| RP11-114N19.3 | CD1A     | -0.422482791 | 1.97E-20    |
| RP11-114N19.3 | C3       | -0.404930401 | 0           |
| RP11-114N19.3 | NT5E     | -0.448367738 | 0           |
| RP11-114N19.3 | CACNG4   | -0.539228278 | 1.76E-34    |
| RP11-114N19.3 | FHOD1    | -0.30146461  | 1.40E-10    |
| RP11-114N19.3 | LEMD1    | -0.56030234  | 0           |
| RP11-114N19.3 | ATP11A   | -0.099793911 | 0.036638175 |
| RP11-114N19.3 | PPAP2C   | -0.375146731 | 3.00E-16    |
| RP11-114N19.3 | DRAM1    | -0.525215663 | 0           |
| RP11-114N19.3 | CDA      | -0.220286539 | 3.35E-06    |
| RP11-114N19.3 | CCND2    | -0.300291475 | 1.66E-10    |
| RP11-114N19.3 | LCN6     | -0.175483316 | 0.000219876 |
| RP11-114N19.3 | CDH4     | -0.402230956 | 0           |
| RP11-114N19.3 | MMP11    | -0.487162179 | 0           |
| RP11-114N19.3 | B3GAT1   | -0.288102843 | 9.26E-10    |

|               |          |              |             |
|---------------|----------|--------------|-------------|
| RP11-114N19.3 | SPP1     | -0.250416717 | 1.17E-07    |
| RP11-114N19.3 | HLA-DQB1 | -0.417648794 | 0           |
| RP11-114N19.3 | SDC3     | -0.502436336 | 0           |
| RP11-114N19.3 | CX3CL1   | -0.444431616 | 0           |
| RP11-114N19.3 | SDK1     | -0.360178658 | 8.55E-15    |
| RP11-114N19.3 | DOCK9    | -0.356322532 | 1.79E-14    |
| RP11-114N19.3 | CSF2     | -0.53242477  | 1.66E-33    |
| RP11-114N19.3 | GRHL3    | -0.602921561 | 0           |
| RP11-114N19.3 | TMEM92   | -0.601850943 | 1.32E-44    |
| RP11-114N19.3 | BASP1    | -0.559709177 | 0           |
| RP11-114N19.3 | HRH1     | -0.550839108 | 0           |
| RP11-114N19.3 | ESM1     | 0.055447397  | 0.246214651 |
| RP11-114N19.3 | B4GALNT3 | -0.552911916 | 0           |
| RP11-114N19.3 | LMO3     | -0.114860702 | 0.016093955 |
| RP11-114N19.3 | C9orf16  | -0.623811901 | 0           |
| RP11-114N19.3 | SEMA3F   | -0.216180638 | 5.12E-06    |
| RP11-114N19.3 | PLA2G12B | -0.145004302 | 0.002321955 |
| RP11-114N19.3 | KLK6     | -0.413577545 | 1.44E-19    |
| RP11-114N19.3 | ST3GAL5  | -0.282047674 | 2.12E-09    |
| RP11-114N19.3 | FAM132B  | -0.118200399 | 0.013244437 |
| RP11-114N19.3 | CDKN1A   | -0.37669701  | 1.91E-16    |
| RP11-114N19.3 | E2F1     | -0.512250048 | 0           |
| RP11-114N19.3 | B3GNT8   | -0.378436785 | 1.08E-16    |
| RP11-114N19.3 | MTMR11   | -0.420341856 | 0           |
| RP11-114N19.3 | MYO1G    | -0.481436924 | 0           |
| RP11-114N19.3 | TMSB10   | -0.563370135 | 0           |
| RP11-114N19.3 | UNC5CL   | -0.502615619 | 0           |
| RP11-114N19.3 | ABR      | -0.520854881 | 0           |
| RP11-114N19.3 | PLP2     | -0.584135942 | 0           |
| RP11-114N19.3 | SRCIN1   | -0.334810945 | 7.91E-13    |
| RP11-114N19.3 | PDE9A    | -0.607134408 | 0           |
| RP11-114N19.3 | TREM2    | -0.357992381 | 1.31E-14    |
| RP11-114N19.3 | KDELR3   | -0.373037187 | 5.24E-16    |
| RP11-114N19.3 | PC       | -0.451414967 | 0           |
| RP11-114N19.3 | C2CD4A   | -0.544007098 | 0           |
| RP11-114N19.3 | PELI1    | -0.454323763 | 0           |
| RP11-114N19.3 | SSX1     | -0.256501105 | 5.61E-08    |
| RP11-114N19.3 | MROH6    | -0.536419804 | 0           |
| RP11-114N19.3 | ESPN     | -0.421023667 | 0           |
| RP11-114N19.3 | BMP1     | -0.248057824 | 1.54E-07    |
| RP11-114N19.3 | TM4SF4   | -0.499289608 | 4.69E-29    |
| RP11-114N19.3 | CORO2A   | -0.432690055 | 0           |
| RP11-114N19.3 | CD164L2  | -0.475010655 | 4.33E-26    |
| RP11-114N19.3 | CTSS     | -0.413859615 | 0           |
| RP11-114N19.3 | CLU      | -0.462534998 | 0           |
| RP11-114N19.3 | TMSB4X   | -0.585709909 | 0           |
| RP11-114N19.3 | WNT10A   | -0.492109405 | 3.74E-28    |
| RP11-114N19.3 | NAPSA    | -0.397282259 | 0           |
| RP11-114N19.3 | PLEKHA4  | -0.424819796 | 0           |
| RP11-114N19.3 | SFTPA1   | -0.042069799 | 0.379218911 |
| RP11-114N19.3 | C1orf116 | -0.483069895 | 0           |



|               |          |              |             |
|---------------|----------|--------------|-------------|
| RP11-114N19.3 | TM4SF1   | -0.518725622 | 0           |
| RP11-114N19.3 | SEL1L3   | -0.440128703 | 0           |
| RP11-114N19.3 | VASN     | -0.558754755 | 0           |
| RP11-114N19.3 | NPTXR    | -0.577126068 | 0           |
| RP11-114N19.3 | PDE4C    | -0.451580207 | 0           |
| RP11-114N19.3 | CDC42EP1 | -0.588422402 | 0           |
| RP11-114N19.3 | ENDOD1   | -0.577326484 | 0           |
| RP11-114N19.3 | RYR1     | -0.498768854 | 0           |
| RP11-114N19.3 | IL1RAP   | -0.460093981 | 0           |
| RP11-114N19.3 | SLC35F2  | -0.527062827 | 9.43E-33    |
| RP11-114N19.3 | ISYNA1   | -0.323403836 | 5.02E-12    |
| RP11-114N19.3 | HLA-G    | -0.575537634 | 0           |
| RP11-114N19.3 | CDKN2B   | -0.515098704 | 0           |
| RP11-114N19.3 | ALDH1A3  | -0.52047575  | 0           |
| RP11-114N19.3 | CLIP3    | -0.364332784 | 3.71E-15    |
| RP11-114N19.3 | ULBP2    | -0.43388021  | 0           |
| RP11-114N19.3 | ETHE1    | -0.649059762 | 0           |
| RP11-114N19.3 | XPR1     | -0.411602703 | 0           |
| RP11-114N19.3 | SPTBN2   | -0.590292667 | 0           |
| RP11-114N19.3 | IVL      | -0.577198697 | 2.33E-40    |
| RP11-114N19.3 | MARCO    | -0.483055853 | 0           |
| RP11-114N19.3 | PLXND1   | -0.221307341 | 3.01E-06    |
| RP11-114N19.3 | EMILIN2  | -0.416806282 | 0           |
| RP11-114N19.3 | PLAUR    | -0.553987609 | 0           |
| RP11-114N19.3 | CDC42EP5 | -0.574924897 | 0           |
| RP11-114N19.3 | TRPC5    | -0.175957206 | 0.000211266 |
| RP11-114N19.3 | TMEM100  | -0.349550093 | 6.24E-14    |
| RP11-114N19.3 | QSOX1    | -0.605142163 | 0           |
| RP11-114N19.3 | ARHGAP23 | -0.390156645 | 0           |
| RP11-114N19.3 | MDF1     | -0.331408982 | 1.39E-12    |
| RP11-114N19.3 | FSTL3    | -0.58606975  | 0           |
| RP11-114N19.3 | INF2     | -0.428981865 | 0           |
| RP11-114N19.3 | TGFBR1   | -0.486302788 | 0           |
| RP11-114N19.3 | TGFBI    | -0.302456761 | 1.21E-10    |
| RP11-114N19.3 | ERBB3    | -0.541941949 | 0           |
| RP11-114N19.3 | CCL18    | -0.357409855 | 1.46E-14    |
| RP11-114N19.3 | CCL17    | -0.505420182 | 7.65E-30    |
| RP11-114N19.3 | C16orf45 | -0.318304791 | 1.12E-11    |
| RP11-114N19.3 | PRDM1    | -0.201711407 | 2.14E-05    |
| RP11-114N19.3 | TRIM47   | -0.598518227 | 0           |
| RP11-114N19.3 | CNFN     | -0.479822533 | 0           |
| RP11-114N19.3 | ARMCX3   | -0.257609704 | 4.90E-08    |
| RP11-114N19.3 | RAMP1    | -0.36590902  | 2.67E-15    |
| RP11-114N19.3 | GABRD    | -0.016677352 | 0.727394377 |
| RP11-114N19.3 | COL13A1  | -0.118394007 | 0.013093818 |
| RP11-114N19.3 | S100A5   | -0.460033842 | 0           |
| RP11-114N19.3 | MISP     | -0.516963012 | 0           |
| RP11-114N19.3 | HES6     | -0.261787091 | 2.93E-08    |
| RP11-114N19.3 | PSD3     | -0.398443763 | 0           |
| RP11-114N19.3 | DOK7     | -0.56079182  | 0           |
| RP11-114N19.3 | ZMAT3    | -0.529572333 | 0           |

|               |           |              |             |
|---------------|-----------|--------------|-------------|
| RP11-114N19.3 | MFAP2     | -0.290017077 | 7.11E-10    |
| RP11-114N19.3 | TMEM79    | -0.481295654 | 0           |
| RP11-114N19.3 | SLC1A5    | -0.419558064 | 0           |
| RP11-114N19.3 | BBC3      | -0.525656919 | 0           |
| RP11-114N19.3 | HLA-DQB2  | -0.452505837 | 0           |
| RP11-114N19.3 | C1QL1     | -0.353872437 | 2.84E-14    |
| RP11-114N19.3 | TMEM215   | -0.108618008 | 0.022843072 |
| RP11-114N19.3 | PNP       | -0.443467407 | 0           |
| RP11-114N19.3 | ARNTL     | -0.370225549 | 1.03E-15    |
| RP11-114N19.3 | CLDN2     | -0.269917063 | 9.12E-09    |
| RP11-114N19.3 | MVP       | -0.675851519 | 0           |
| RP11-114N19.3 | LGALS1    | -0.568390602 | 0           |
| RP11-114N19.3 | BIRC7     | -0.406175735 | 7.22E-19    |
| RP11-114N19.3 | COL8A1    | -0.445883177 | 0           |
| RP11-114N19.3 | PERP      | -0.601767858 | 0           |
| RP11-114N19.3 | GJA4      | -0.207293265 | 1.25E-05    |
| RP11-114N19.3 | IGFL2     | -0.535237051 | 6.61E-34    |
| RP11-114N19.3 | DAPK2     | -0.335923799 | 6.58E-13    |
| RP11-114N19.3 | MAMLD1    | -0.502524134 | 0           |
| RP11-114N19.3 | ETV5      | -0.212253735 | 7.63E-06    |
| RP11-114N19.3 | RUNX1     | -0.626250933 | 0           |
| RP11-114N19.3 | LONRF2    | -0.157297946 | 0.000955311 |
| RP11-114N19.3 | SPOCK1    | -0.101267031 | 0.03394352  |
| RP11-114N19.3 | XKRX      | -0.343517618 | 1.81E-13    |
| RP11-114N19.3 | TGFB1     | -0.284815768 | 1.45E-09    |
| RP11-114N19.3 | ERP27     | -0.229809626 | 1.22E-06    |
| RP11-114N19.3 | TNFRSF10C | -0.414964668 | 0           |
| RP11-114N19.3 | PALM      | -0.535343118 | 0           |
| RP11-114N19.3 | TSC22D1   | -0.302178051 | 1.26E-10    |
| RP11-114N19.3 | TGM2      | -0.544928897 | 0           |
| RP11-114N19.3 | UBE2QL1   | -0.20068252  | 2.36E-05    |
| RP11-114N19.3 | ECE1      | -0.501112145 | 0           |
| RP11-114N19.3 | COL8A2    | -0.549185713 | 0           |
| RP11-114N19.3 | HIST3H2A  | -0.44689944  | 0           |
| RP11-114N19.3 | TNFRSF21  | -0.5160171   | 0           |
| RP11-114N19.3 | SOX4      | -0.493972347 | 0           |
| RP11-114N19.3 | ELF3      | -0.594037734 | 0           |
| RP11-114N19.3 | TPD52L1   | -0.450770885 | 0           |
| RP11-114N19.3 | INHBB     | -0.311045425 | 3.38E-11    |
| RP11-114N19.3 | HPN       | -0.332815013 | 1.10E-12    |
| RP11-114N19.3 | MMP7      | -0.454177438 | 9.96E-24    |
| RP11-114N19.3 | RAB27A    | -0.408749649 | 0           |
| RP11-114N19.3 | IGF2BP2   | -0.294561397 | 3.76E-10    |
| RP11-114N19.3 | ITGB4     | -0.524579382 | 0           |
| RP11-114N19.3 | PPP1R1B   | -0.463939895 | 0           |
| RP11-114N19.3 | NPDC1     | -0.33589685  | 6.60E-13    |
| RP11-114N19.3 | CCL13     | -0.559634982 | 1.51E-37    |
| RP11-114N19.3 | SPINT1    | -0.693354505 | 0           |
| RP11-114N19.3 | HEY2      | -0.221826749 | 2.85E-06    |
| RP11-114N19.3 | CST2      | -0.54193161  | 7.09E-35    |
| RP11-114N19.3 | ADM       | -0.308129395 | 5.24E-11    |

|               |            |              |           |
|---------------|------------|--------------|-----------|
| RP11-114N19.3 | VSTM2L     | -0.49819725  | 0         |
| RP11-114N19.3 | FAM84A     | -0.460087315 | 0         |
| RP11-114N19.3 | P4HA2      | -0.433965738 | 0         |
| RP11-114N19.3 | LPL        | -0.278450685 | 3.43E-09  |
| RP11-114N19.3 | TMEM173    | -0.437582585 | 0         |
| RP11-114N19.3 | DHRS3      | -0.437988381 | 0         |
| RP11-114N19.3 | SCN1B      | -0.552191384 | 0         |
| RP11-114N19.3 | GLT1D1     | -0.216421194 | 5.00E-06  |
| RP11-114N19.3 | PHYHIP     | -0.451323624 | 0         |
| RP11-114N19.3 | BHLHE40    | -0.477061106 | 0         |
| RP11-114N19.3 | BID        | -0.565437695 | 0         |
| RP11-114N19.3 | POSTN      | -0.310826712 | 3.50E-11  |
| RP11-114N19.3 | ITGA3      | -0.669023196 | 0         |
| RP11-114N19.3 | RSPO4      | -0.460715228 | 0         |
| RP11-114N19.3 | ADAMTS9    | -0.091609908 | 0.0551341 |
| RP11-114N19.3 | ABTB2      | -0.591132626 | 0         |
| RP11-114N19.3 | KCNQ3      | -0.570609219 | 0         |
| RP11-114N19.3 | ANXA1      | -0.412901364 | 0         |
| RP11-114N19.3 | S100A11    | -0.640217351 | 0         |
| RP11-114N19.3 | CEACAM6    | -0.557809657 | 2.90E-37  |
| RP11-114N19.3 | IER5L      | -0.506621383 | 0         |
| RP11-114N19.3 | KRT80      | -0.56083735  | 0         |
| RP11-114N19.3 | CDH6       | -0.581106443 | 0         |
| RP11-114N19.3 | UNC5B      | -0.364545114 | 3.55E-15  |
| RP11-114N19.3 | PLEKHN1    | -0.545432986 | 0         |
| RP11-114N19.3 | SYTL1      | -0.458179038 | 0         |
| RP11-114N19.3 | TMEM163    | -0.512163101 | 0         |
| RP11-114N19.3 | C4orf48    | -0.307167598 | 6.04E-11  |
| RP11-114N19.3 | B3GNT7     | -0.312724067 | 2.63E-11  |
| RP11-114N19.3 | BAIAP3     | -0.388897415 | 0         |
| RP11-114N19.3 | PHLDA2     | -0.571671153 | 0         |
| RP11-114N19.3 | GAP43      | -0.513867699 | 5.93E-31  |
| RP11-114N19.3 | S100A1     | -0.488359994 | 0         |
| RP11-114N19.3 | PTPRE      | -0.533155422 | 0         |
| RP11-114N19.3 | CCND1      | -0.518006791 | 0         |
| RP11-114N19.3 | ST6GALNAC5 | -0.629793903 | 6.87E-50  |
| RP11-114N19.3 | KRT17      | -0.282893733 | 1.89E-09  |
| RP11-114N19.3 | HPCAL4     | -0.232087672 | 9.48E-07  |
| RP11-114N19.3 | GABBR2     | -0.250838683 | 1.11E-07  |
| RP11-114N19.3 | DIRAS3     | -0.295540499 | 3.27E-10  |
| RP11-114N19.3 | SERINC2    | -0.490386421 | 0         |
| RP11-114N19.3 | PTCHD4     | -0.394757841 | 0         |
| RP11-114N19.3 | EPS8       | -0.287526275 | 1.00E-09  |
| RP11-114N19.3 | LY6E       | -0.569489982 | 0         |
| RP11-114N19.3 | UPP1       | -0.62614498  | 0         |
| RP11-114N19.3 | AHNAK2     | -0.59668399  | 0         |
| RP11-114N19.3 | PLXNC1     | -0.315084521 | 1.83E-11  |
| RP11-114N19.3 | TNC        | -0.536307753 | 0         |
| RP11-114N19.3 | DUSP4      | -0.410024056 | 0         |
| RP11-114N19.3 | NRCAM      | -0.354233697 | 2.65E-14  |
| RP11-114N19.3 | NRP2       | -0.355808656 | 1.98E-14  |

|               |         |              |             |
|---------------|---------|--------------|-------------|
| RP11-114N19.3 | CTSC    | -0.548371001 | 0           |
| RP11-114N19.3 | AMIG02  | -0.3050338   | 8.28E-11    |
| RP11-114N19.3 | NAB2    | -0.341093621 | 2.74E-13    |
| RP11-114N19.3 | TBC1D2  | -0.618245787 | 0           |
| RP11-114N19.3 | PHLDA3  | -0.592204489 | 0           |
| RP11-114N19.3 | PTP4A3  | -0.426222281 | 0           |
| RP11-114N19.3 | CRABP2  | -0.292443627 | 5.06E-10    |
| RP11-114N19.3 | GOS2    | -0.393974333 | 0           |
| RP11-114N19.3 | S100A6  | -0.671390741 | 0           |
| RP11-114N19.3 | FOXQ1   | -0.439272432 | 0           |
| RP11-114N19.3 | LRG1    | -0.490365004 | 0           |
| RP11-114N19.3 | LAMP5   | -0.402125146 | 0           |
| RP11-114N19.3 | ALDH3B1 | -0.590838456 | 0           |
| RP11-114N19.3 | CDH2    | -0.007127032 | 0.881582415 |
| RP11-114N19.3 | SCG5    | -0.15776303  | 0.000922255 |
| RP11-114N19.3 | ZCCHC16 | -0.185983459 | 8.86E-05    |
| RP11-114N19.3 | GRB7    | -0.529583821 | 0           |
| RP11-114N19.3 | TIAM1   | -0.383817518 | 0           |
| RP11-114N19.3 | FXYD5   | -0.420903531 | 0           |
| RP11-114N19.3 | CLDN9   | -0.457871819 | 0           |
| RP11-114N19.3 | FAM43A  | -0.468115438 | 0           |
| RP11-114N19.3 | CHST2   | -0.430991413 | 0           |
| RP11-114N19.3 | HMGA2   | -0.344257582 | 1.59E-13    |
| RP11-114N19.3 | GALNT7  | -0.380873547 | 3.80E-17    |
| RP11-114N19.3 | CBLN1   | -0.441373324 | 0           |
| RP11-114N19.3 | STRA6   | -0.511956161 | 0           |
| RP11-114N19.3 | MUC21   | -0.523555326 | 2.89E-32    |
| RP11-114N19.3 | PRR36   | -0.403155451 | 0           |
| RP11-114N19.3 | NFE2L3  | -0.510643458 | 0           |
| RP11-114N19.3 | NR1D1   | -0.346558748 | 1.06E-13    |
| RP11-114N19.3 | MUC1    | -0.630247619 | 0           |
| RP11-114N19.3 | NAT8L   | -0.170064281 | 0.000351061 |
| RP11-114N19.3 | APOC1   | -0.212341107 | 7.56E-06    |
| RP11-114N19.3 | EVA1A   | -0.621650587 | 0           |
| RP11-114N19.3 | ENTPD1  | -0.121111118 | 0.011133852 |
| RP11-114N19.3 | COL1A1  | -0.412734138 | 0           |
| RP11-114N19.3 | FNDC4   | -0.434340188 | 0           |
| RP11-114N19.3 | FRMD3   | -0.036028333 | 0.451317951 |
| RP11-114N19.3 | SHROOM4 | -0.341229075 | 2.68E-13    |
| RP11-114N19.3 | NELL2   | -0.240219904 | 3.82E-07    |
| RP11-114N19.3 | EPHB3   | -0.607159655 | 0           |
| RP11-114N19.3 | TMC6    | -0.574844476 | 0           |
| RP11-114N19.3 | NOD1    | -0.329939265 | 1.76E-12    |
| RP11-114N19.3 | GGCT    | -0.502525268 | 0           |
| RP11-114N19.3 | ICAM1   | -0.483140104 | 0           |
| RP11-114N19.3 | PRSS23  | -0.467361432 | 0           |
| RP11-114N19.3 | CFI     | -0.428235092 | 0           |
| RP11-114N19.3 | CD55    | -0.593014238 | 0           |
| RP11-114N19.3 | RASD2   | -0.45868951  | 0           |
| RP11-114N19.3 | KLK11   | -0.328265325 | 1.73E-12    |
| RP11-114N19.3 | ICAM5   | -0.311065424 | 3.37E-11    |

|               |           |              |             |
|---------------|-----------|--------------|-------------|
| RP11-114N19.3 | ADORA1    | -0.510981882 | 0           |
| RP11-114N19.3 | ITGA2     | -0.512249338 | 0           |
| RP11-114N19.3 | ABCC3     | -0.288052349 | 9.33E-10    |
| RP11-114N19.3 | MFGE8     | -0.52773157  | 0           |
| RP11-114N19.3 | STK32A    | -0.233639512 | 7.99E-07    |
| RP11-114N19.3 | CYSLTR2   | -0.295062649 | 3.50E-10    |
| RP11-114N19.3 | LAD1      | -0.594209783 | 0           |
| RP11-114N19.3 | MGAT3     | -0.558335626 | 0           |
| RP11-114N19.3 | IGFBP6    | -0.463929541 | 0           |
| RP11-114N19.3 | CYP2S1    | -0.615206926 | 0           |
| RP11-114N19.3 | KCNJ2     | -0.371405776 | 7.81E-16    |
| RP11-114N19.3 | FAM20A    | -0.424718524 | 0           |
| RP11-114N19.3 | TGFA      | -0.386601781 | 0           |
| RP11-114N19.3 | MXRA8     | -0.51169745  | 0           |
| RP11-114N19.3 | C8orf4    | -0.388381695 | 0           |
| RP11-114N19.3 | CLDN10    | -0.471968739 | 9.80E-26    |
| RP11-114N19.3 | PDE5A     | -0.415607191 | 0           |
| RP11-114N19.3 | APOE      | -0.195366465 | 3.89E-05    |
| RP11-114N19.3 | SPOCK2    | -0.564051095 | 0           |
| RP11-114N19.3 | TENM1     | -0.016358218 | 0.732409319 |
| RP11-114N19.3 | SLIT1     | -0.182778277 | 0.000120566 |
| RP11-114N19.3 | CXCL14    | -0.294034898 | 4.05E-10    |
| RP11-114N19.3 | ECM1      | -0.177866741 | 0.000183762 |
| RP11-114N19.3 | DUSP5     | -0.60471878  | 0           |
| RP11-114N19.3 | SEZ6L2    | -0.412737967 | 0           |
| RP11-114N19.3 | THRSP     | -0.147977828 | 0.001896862 |
| RP11-114N19.3 | C19orf33  | -0.6237068   | 0           |
| RP11-114N19.3 | MPZL2     | -0.425904283 | 0           |
| RP11-114N19.3 | CTSH      | -0.528470826 | 0           |
| RP11-114N19.3 | CYP1B1    | -0.492069177 | 0           |
| RP11-114N19.3 | ALOX5     | -0.572961446 | 0           |
| RP11-114N19.3 | SYTL5     | -0.43663371  | 7.33E-22    |
| RP11-114N19.3 | TNFRSF12A | -0.490531662 | 0           |
| RP11-114N19.3 | DUSP6     | -0.43553857  | 0           |
| RP11-114N19.3 | ALOX15B   | -0.588100858 | 0           |
| RP11-114N19.3 | SDC4      | -0.549394639 | 0           |
| RP11-114N19.3 | MDK       | -0.449213939 | 0           |
| RP11-114N19.3 | KRT19     | -0.690891503 | 0           |
| RP11-114N19.3 | MET       | -0.565222528 | 0           |
| RP11-114N19.3 | TESC      | -0.18308578  | 0.000117384 |
| RP11-114N19.3 | CXCL17    | -0.609916565 | 4.46E-46    |
| RP11-114N19.3 | NPC2      | -0.429119305 | 0           |
| RP11-114N19.3 | COMP      | -0.441846351 | 0           |
| RP11-114N19.3 | TUSC3     | -0.37680665  | 1.85E-16    |
| RP11-114N19.3 | TMPRSS4   | -0.636329595 | 0           |
| RP11-114N19.3 | LGALS3    | -0.621509459 | 0           |
| RP11-114N19.3 | CRLF1     | -0.484056372 | 0           |
| RP11-114N19.3 | CTXN1     | -0.578154103 | 0           |
| RP11-114N19.3 | PCSK1N    | -0.255005291 | 6.73E-08    |
| RP11-114N19.3 | NMU       | -0.441167439 | 2.47E-22    |
| RP11-114N19.3 | GALE      | -0.487328696 | 0           |

|               |          |              |             |
|---------------|----------|--------------|-------------|
| RP11-114N19.3 | PCSK2    | -0.147900385 | 0.001907404 |
| RP11-114N19.3 | GJB3     | -0.516349992 | 0           |
| RP11-114N19.3 | SLPI     | -0.606809175 | 0           |
| RP11-114N19.3 | AGR2     | -0.272730109 | 7.27E-09    |
| RP11-114N19.3 | MRC2     | -0.524835682 | 0           |
| RP11-114N19.3 | GOLT1A   | -0.416866562 | 0           |
| RP11-114N19.3 | SLC27A6  | -0.468150276 | 2.70E-25    |
| RP11-114N19.3 | KCNN4    | -0.657902598 | 0           |
| RP11-114N19.3 | ETV4     | -0.362412038 | 4.51E-15    |
| RP11-114N19.3 | SYT12    | -0.581060913 | 0           |
| RP11-114N19.3 | PVRL4    | -0.638252056 | 0           |
| RP11-114N19.3 | PLCD3    | -0.543292097 | 0           |
| RP11-114N19.3 | PLAU     | -0.589943038 | 0           |
| RP11-114N19.3 | LRRK2    | -0.056890732 | 0.234119309 |
| RP11-114N19.3 | SFN      | -0.631601313 | 0           |
| RP11-114N19.3 | LPAR5    | -0.437374651 | 0           |
| RP11-114N19.3 | NGEF     | -0.563152841 | 0           |
| RP11-114N19.3 | DTX4     | -0.452131812 | 0           |
| RP11-114N19.3 | CST6     | -0.555297333 | 0           |
| RP11-114N19.3 | QPCT     | -0.37583308  | 2.47E-16    |
| RP11-114N19.3 | TIMP1    | -0.530820783 | 0           |
| RP11-114N19.3 | CAMK2N1  | -0.480309886 | 0           |
| RP11-114N19.3 | KLHDC8A  | -0.164931195 | 0.000529582 |
| RP11-114N19.3 | PDLIM4   | -0.621011611 | 0           |
| RP11-114N19.3 | SCEL     | -0.444194039 | 0           |
| RP11-114N19.3 | LCN2     | -0.671223941 | 0           |
| RP11-114N19.3 | PROS1    | -0.593531234 | 0           |
| RP11-114N19.3 | GABRB2   | -0.475823294 | 0           |
| RP11-114N19.3 | TMPRSS6  | -0.580583631 | 0           |
| RP11-114N19.3 | KLK7     | -0.481644111 | 7.07E-27    |
| RP11-114N19.3 | PDZK1IP1 | -0.514193784 | 0           |
| RP11-114N19.3 | CDH3     | -0.444677278 | 0           |
| RP11-114N19.3 | LRP4     | -0.214820987 | 5.89E-06    |
| RP11-114N19.3 | IGSF1    | -0.266135392 | 1.69E-08    |
| RP11-114N19.3 | B3GNT3   | -0.654713532 | 0           |
| RP11-114N19.3 | CLDN1    | -0.578648831 | 0           |
| RP11-114N19.3 | GDF15    | -0.616448852 | 0           |
| RP11-114N19.3 | ARHGAP36 | -0.284621527 | 1.26E-09    |
| RP11-114N19.3 | LAMB3    | -0.554926996 | 0           |
| RP11-114N19.3 | KLK10    | -0.496797459 | 0           |
| RP11-114N19.3 | DPP4     | -0.520167964 | 0           |
| RP11-114N19.3 | METTL7B  | -0.429713177 | 0           |
| RP11-114N19.3 | LIPH     | -0.625648834 | 0           |
| RP11-114N19.3 | CLDN16   | -0.488560552 | 0           |
| RP11-114N19.3 | CHI3L1   | -0.502654198 | 0           |
| RP11-114N19.3 | SLC22A31 | -0.459040436 | 2.89E-24    |
| RP11-114N19.3 | TACSTD2  | -0.607450846 | 0           |
| RP11-114N19.3 | SFTPB    | -0.530400378 | 0           |
| RP11-114N19.3 | RXRG     | -0.284159346 | 1.59E-09    |
| RP11-114N19.3 | DCSTAMP  | -0.56040147  | 1.15E-37    |
| RP11-114N19.3 | CITED1   | -0.381303455 | 2.96E-17    |

|               |           |              |          |
|---------------|-----------|--------------|----------|
| RP11-114N19.3 | SERPINA1  | -0.619787273 | 0        |
| RP11-114N19.3 | PRR15     | -0.347273323 | 9.36E-14 |
| RP11-114N19.3 | SLC34A2   | -0.591881952 | 0        |
| RP11-114N19.3 | FN1       | -0.65486473  | 0        |
| RP11-114N19.3 | ZCCHC12   | -0.233463634 | 8.15E-07 |
| AP001258.4    | TFF3      | -0.557880046 | 0        |
| AP001258.4    | CCL21     | -0.281913951 | 1.83E-09 |
| AP001258.4    | TPO       | -0.626450781 | 0        |
| AP001258.4    | MT1G      | -0.614183288 | 0        |
| AP001258.4    | DIO1      | -0.640758885 | 0        |
| AP001258.4    | DPT       | -0.231783939 | 9.13E-07 |
| AP001258.4    | CDH16     | -0.520048537 | 0        |
| AP001258.4    | CRABP1    | -0.423193082 | 1.67E-20 |
| AP001258.4    | SLC26A7   | -0.530853547 | 0        |
| AP001258.4    | MT1H      | -0.569591476 | 4.04E-39 |
| AP001258.4    | SLC26A4   | -0.523552197 | 0        |
| AP001258.4    | SLC5A8    | -0.580896056 | 5.66E-41 |
| AP001258.4    | PKHD1L1   | -0.502738486 | 1.70E-29 |
| AP001258.4    | TFCP2L1   | -0.55748049  | 0        |
| AP001258.4    | WSCD2     | -0.564308833 | 2.80E-38 |
| AP001258.4    | IPCEF1    | -0.473395751 | 0        |
| AP001258.4    | SLC5A5    | -0.447884277 | 4.79E-23 |
| AP001258.4    | MT1F      | -0.605025857 | 0        |
| AP001258.4    | FOSB      | -0.364041734 | 3.94E-15 |
| AP001258.4    | SEMA3D    | -0.526695256 | 1.06E-32 |
| AP001258.4    | BMP8A     | -0.488481974 | 0        |
| AP001258.4    | MATN2     | -0.514993319 | 0        |
| AP001258.4    | PLA2R1    | -0.419083619 | 0        |
| AP001258.4    | COL23A1   | -0.500690179 | 0        |
| AP001258.4    | HGD       | -0.6496464   | 0        |
| AP001258.4    | TCEAL2    | -0.418518114 | 0        |
| AP001258.4    | CHRD1     | -0.266906286 | 1.35E-08 |
| AP001258.4    | TNFRSF11B | -0.480197834 | 0        |
| AP001258.4    | FAM167A   | -0.614484833 | 0        |
| AP001258.4    | KIT       | -0.443803703 | 0        |
| AP001258.4    | SLC4A4    | -0.600527634 | 0        |
| AP001258.4    | SMOC2     | -0.288315315 | 9.00E-10 |
| AP001258.4    | FHL1      | -0.639725035 | 0        |
| AP001258.4    | OTOS      | -0.596394642 | 0        |
| AP001258.4    | IGFBPL1   | -0.507905506 | 3.63E-30 |
| AP001258.4    | HBB       | -0.358267403 | 1.24E-14 |
| AP001258.4    | BEX1      | -0.399920571 | 0        |
| AP001258.4    | FABP4     | -0.516933725 | 2.30E-31 |
| AP001258.4    | LMOD1     | -0.536940772 | 0        |
| AP001258.4    | SOD3      | -0.644080427 | 0        |
| AP001258.4    | TMEM171   | -0.473111935 | 0        |
| AP001258.4    | PI16      | -0.240178062 | 3.84E-07 |
| AP001258.4    | ZMAT4     | -0.615385662 | 4.24E-47 |
| AP001258.4    | MFAP4     | -0.187015378 | 8.31E-05 |
| AP001258.4    | CWH43     | -0.501093369 | 2.76E-29 |
| AP001258.4    | SPX       | -0.588386376 | 0        |

|            |            |              |             |
|------------|------------|--------------|-------------|
| AP001258.4 | APOD       | -0.118571445 | 0.012957107 |
| AP001258.4 | DPP6       | -0.490903701 | 0           |
| AP001258.4 | MMRN1      | -0.330102662 | 1.72E-12    |
| AP001258.4 | WDR72      | -0.396731789 | 0           |
| AP001258.4 | MPPED2     | -0.60659415  | 0           |
| AP001258.4 | PAPSS2     | -0.425080918 | 0           |
| AP001258.4 | DCN        | -0.058458457 | 0.221464163 |
| AP001258.4 | SORBS2     | -0.566456937 | 0           |
| AP001258.4 | EGR2       | -0.201570988 | 2.17E-05    |
| AP001258.4 | EDN3       | -0.484744373 | 2.99E-27    |
| AP001258.4 | DIO2       | -0.44378569  | 0           |
| AP001258.4 | ITPR1      | -0.628707552 | 0           |
| AP001258.4 | CFD        | -0.299226846 | 1.93E-10    |
| AP001258.4 | CPXM1      | -0.421299824 | 0           |
| AP001258.4 | ELMO1      | -0.620191225 | 0           |
| AP001258.4 | GPC3       | -0.425922666 | 8.97E-21    |
| AP001258.4 | MYOC       | -0.103409033 | 0.030288803 |
| AP001258.4 | DEPTOR     | -0.568992701 | 0           |
| AP001258.4 | DGKI       | -0.488541687 | 0           |
| AP001258.4 | CARTPT     | -0.502257716 | 1.96E-29    |
| AP001258.4 | IYD        | -0.352681431 | 3.53E-14    |
| AP001258.4 | LYVE1      | -0.254036259 | 7.56E-08    |
| AP001258.4 | CLCNKB     | -0.518150614 | 0           |
| AP001258.4 | NCAM1      | -0.495622339 | 0           |
| AP001258.4 | HBA2       | -0.37181682  | 7.08E-16    |
| AP001258.4 | GLT8D2     | -0.42228857  | 0           |
| AP001258.4 | OGDHL      | -0.509230051 | 0           |
| AP001258.4 | LIFR       | -0.517161867 | 0           |
| AP001258.4 | CSGALNACT1 | -0.363105609 | 4.77E-15    |
| AP001258.4 | RAP1GAP    | -0.44225087  | 0           |
| AP001258.4 | COL9A3     | -0.536744185 | 0           |
| AP001258.4 | FBLN1      | -0.142898215 | 0.002713583 |
| AP001258.4 | EFEMP1     | -0.430559945 | 0           |
| AP001258.4 | AOX1       | -0.445865251 | 7.87E-23    |
| AP001258.4 | GRIN2C     | -0.567749924 | 0           |
| AP001258.4 | C11orf74   | -0.537473654 | 0           |
| AP001258.4 | PPARGC1A   | -0.589698653 | 0           |
| AP001258.4 | ANGPTL1    | -0.423123282 | 0           |
| AP001258.4 | SCARA5     | -0.207162585 | 1.21E-05    |
| AP001258.4 | LTF        | -0.458777875 | 0           |
| AP001258.4 | CA4        | -0.551806279 | 2.40E-36    |
| AP001258.4 | TG         | -0.474537682 | 0           |
| AP001258.4 | FCGBP      | -0.611866236 | 0           |
| AP001258.4 | PBX4       | -0.532852316 | 0           |
| AP001258.4 | CYR61      | -0.387062752 | 0           |
| AP001258.4 | FOS        | -0.397657985 | 0           |
| AP001258.4 | KHDRBS2    | -0.490466701 | 0           |
| AP001258.4 | MUM1L1     | -0.453036307 | 0           |
| AP001258.4 | RGS16      | -0.481479333 | 0           |
| AP001258.4 | MT1M       | -0.533114431 | 0           |
| AP001258.4 | LRP2       | -0.496664416 | 0           |



|            |          |              |             |
|------------|----------|--------------|-------------|
| AP001258.4 | MAFB     | -0.454134978 | 0           |
| AP001258.4 | KCNK2    | -0.465602226 | 0           |
| AP001258.4 | TBC1D4   | -0.485480275 | 0           |
| AP001258.4 | MIOX     | -0.603297309 | 7.23E-45    |
| AP001258.4 | TPPP     | -0.517819566 | 0           |
| AP001258.4 | FMOD     | -0.515141965 | 0           |
| AP001258.4 | CITED2   | -0.482965219 | 0           |
| AP001258.4 | RGS8     | -0.513346346 | 6.96E-31    |
| AP001258.4 | ABI3BP   | -0.29798109  | 2.31E-10    |
| AP001258.4 | ADH1B    | -0.282708913 | 1.64E-09    |
| AP001258.4 | OGN      | -0.160173383 | 0.000756585 |
| AP001258.4 | NR4A1    | -0.363025471 | 4.85E-15    |
| AP001258.4 | FOXJ1    | -0.544263151 | 3.22E-35    |
| AP001258.4 | ALDH1A1  | -0.476308518 | 0           |
| AP001258.4 | OCA2     | -0.430142097 | 3.38E-21    |
| AP001258.4 | TMEM139  | -0.310805294 | 3.51E-11    |
| AP001258.4 | ARHGAP24 | -0.607514106 | 0           |
| AP001258.4 | SLC25A15 | -0.489255837 | 0           |
| AP001258.4 | DES      | -0.244771112 | 2.07E-07    |
| AP001258.4 | GDF10    | -0.401622009 | 1.91E-18    |
| AP001258.4 | KIAA1324 | -0.522711529 | 0           |
| AP001258.4 | JUN      | -0.381266861 | 3.03E-17    |
| AP001258.4 | C7       | -0.000795706 | 0.986731997 |
| AP001258.4 | LGI3     | -0.735618566 | 0           |
| AP001258.4 | CDON     | -0.651211289 | 0           |
| AP001258.4 | BCL2     | -0.507894938 | 0           |
| AP001258.4 | HLF      | -0.62993033  | 0           |
| AP001258.4 | EGR1     | -0.330162517 | 1.70E-12    |
| AP001258.4 | IP6K3    | -0.431451675 | 0           |
| AP001258.4 | SCUBE3   | -0.399532647 | 0           |
| AP001258.4 | PKNOX2   | -0.484013111 | 0           |
| AP001258.4 | SMAD9    | -0.384522165 | 0           |
| AP001258.4 | IQGAP2   | -0.594106667 | 0           |
| AP001258.4 | GNA14    | -0.645657514 | 0           |
| AP001258.4 | LAYN     | -0.462300116 | 0           |
| AP001258.4 | AVPR1A   | -0.494174891 | 0           |
| AP001258.4 | PDLIM3   | -0.451123776 | 0           |
| AP001258.4 | GPM6A    | -0.456343808 | 0           |
| AP001258.4 | SDPR     | -0.40784104  | 0           |
| AP001258.4 | CRYAB    | -0.275823577 | 4.85E-09    |
| AP001258.4 | FOXA2    | -0.493288963 | 2.67E-28    |
| AP001258.4 | C8orf88  | -0.361117904 | 7.11E-15    |
| AP001258.4 | ISM1     | -0.482860968 | 0           |
| AP001258.4 | BMP2     | -0.326719704 | 2.96E-12    |
| AP001258.4 | ID4      | -0.524457828 | 0           |
| AP001258.4 | NUPR1    | -0.386978784 | 0           |
| AP001258.4 | SERTM1   | -0.460703664 | 1.89E-24    |
| AP001258.4 | IRS1     | -0.494035039 | 0           |
| AP001258.4 | FIBIN    | -0.220384974 | 3.32E-06    |
| AP001258.4 | PODN     | -0.121139548 | 0.011114841 |
| AP001258.4 | TDRD9    | -0.373754457 | 4.36E-16    |

|            |          |              |             |
|------------|----------|--------------|-------------|
| AP001258.4 | EPHA3    | -0.26315511  | 2.47E-08    |
| AP001258.4 | AIF1L    | -0.388505235 | 0           |
| AP001258.4 | EBF4     | -0.653419268 | 0           |
| AP001258.4 | ADM2     | -0.578971227 | 0           |
| AP001258.4 | GSTM3    | -0.623963667 | 0           |
| AP001258.4 | HSD17B6  | -0.329706369 | 1.83E-12    |
| AP001258.4 | AGR3     | -0.389199478 | 2.51E-17    |
| AP001258.4 | EPHB1    | -0.383277402 | 1.96E-18    |
| AP001258.4 | TMOD1    | -0.420689499 | 0           |
| AP001258.4 | WASF3    | -0.518853133 | 0           |
| AP001258.4 | SELV     | -0.605984749 | 2.35E-45    |
| AP001258.4 | ENPP1    | -0.259197571 | 4.03E-08    |
| AP001258.4 | SYNE1    | -0.546737765 | 1.38E-35    |
| AP001258.4 | PLCH1    | -0.510761609 | 0           |
| AP001258.4 | CCDC146  | -0.539956513 | 0           |
| AP001258.4 | SLC16A2  | -0.542729854 | 0           |
| AP001258.4 | IER2     | -0.507025619 | 0           |
| AP001258.4 | KCNAB1   | -0.520631204 | 0           |
| AP001258.4 | SYNDIG1  | -0.518713991 | 0           |
| AP001258.4 | C16orf89 | -0.59307154  | 0           |
| AP001258.4 | CTGF     | -0.289473699 | 7.66E-10    |
| AP001258.4 | NR4A3    | -0.226967777 | 1.65E-06    |
| AP001258.4 | KIAA1456 | -0.426331496 | 0           |
| AP001258.4 | AQP4     | -0.507345887 | 0           |
| AP001258.4 | RNF150   | -0.581652091 | 0           |
| AP001258.4 | C1S      | -0.0241994   | 0.612961001 |
| AP001258.4 | PFKFB2   | -0.442829708 | 0           |
| AP001258.4 | PROX1    | -0.418356136 | 0           |
| AP001258.4 | TCF7L1   | -0.640862994 | 0           |
| AP001258.4 | HSPB6    | -0.322119926 | 6.15E-12    |
| AP001258.4 | FHDC1    | -0.295575674 | 3.25E-10    |
| AP001258.4 | PRR15L   | -0.475055246 | 0           |
| AP001258.4 | SLC1A1   | -0.338399992 | 4.34E-13    |
| AP001258.4 | BTBD11   | -0.599738594 | 0           |
| AP001258.4 | TRIM58   | -0.434623578 | 0           |
| AP001258.4 | LRIG1    | -0.411711492 | 0           |
| AP001258.4 | ROR2     | -0.312547905 | 2.70E-11    |
| AP001258.4 | GPR125   | -0.524406341 | 0           |
| AP001258.4 | FLRT1    | -0.616839046 | 0           |
| AP001258.4 | PGF      | -0.631383451 | 0           |
| AP001258.4 | DUSP1    | -0.377897804 | 1.30E-16    |
| AP001258.4 | PLA2G7   | -0.320441142 | 8.00E-12    |
| AP001258.4 | PLSCR4   | -0.251194978 | 1.06E-07    |
| AP001258.4 | FAM46B   | -0.509552873 | 0           |
| AP001258.4 | GLDC     | -0.552473214 | 0           |
| AP001258.4 | ZBTB16   | -0.389600218 | 0           |
| AP001258.4 | OMD      | -0.087566928 | 0.066799254 |
| AP001258.4 | HSD11B2  | -0.490612509 | 0           |
| AP001258.4 | FGL2     | -0.093165152 | 0.051118509 |
| AP001258.4 | CLCNKA   | -0.606976139 | 1.55E-45    |
| AP001258.4 | GATM     | -0.347176306 | 9.53E-14    |

|            |          |              |             |
|------------|----------|--------------|-------------|
| AP001258.4 | TNS3     | -0.355360876 | 2.15E-14    |
| AP001258.4 | TOB1     | -0.415627331 | 0           |
| AP001258.4 | MARC2    | -0.573524256 | 0           |
| AP001258.4 | LRRC2    | -0.476840833 | 0           |
| AP001258.4 | SORD     | -0.144233611 | 0.002472445 |
| AP001258.4 | RIMS4    | -0.466504736 | 0           |
| AP001258.4 | SLC29A4  | -0.619558348 | 0           |
| AP001258.4 | SLC39A14 | -0.495143922 | 0           |
| AP001258.4 | FAXDC2   | -0.505069968 | 0           |
| AP001258.4 | HSPB8    | -0.425420618 | 0           |
| AP001258.4 | CCL19    | 0.068584634  | 0.151401036 |
| AP001258.4 | KCNIP3   | -0.662383942 | 0           |
| AP001258.4 | CGNL1    | -0.48346023  | 0           |
| AP001258.4 | ATF3     | -0.168125934 | 0.000410583 |
| AP001258.4 | SGCD     | -0.333717097 | 9.49E-13    |
| AP001258.4 | STARD13  | -0.483609585 | 0           |
| AP001258.4 | LDHD     | -0.564478734 | 0           |
| AP001258.4 | RCAN1    | -0.43460287  | 0           |
| AP001258.4 | ID3      | -0.510430135 | 0           |
| AP001258.4 | SYTL3    | -0.518813703 | 0           |
| AP001258.4 | MT1E     | -0.448684319 | 0           |
| AP001258.4 | CAMK1D   | -0.49374711  | 0           |
| AP001258.4 | PRKCQ    | -0.428913925 | 0           |
| AP001258.4 | NUAK2    | -0.312507482 | 2.71E-11    |
| AP001258.4 | LIPG     | -0.420158886 | 0           |
| AP001258.4 | SLC25A25 | -0.286422924 | 1.17E-09    |
| AP001258.4 | PRKX     | -0.09889367  | 0.038372773 |
| AP001258.4 | SRPX     | -0.238545091 | 4.62E-07    |
| AP001258.4 | FAM189A1 | -0.526631482 | 0           |
| AP001258.4 | PLEKHH1  | -0.37128947  | 8.03E-16    |
| AP001258.4 | WNT11    | -0.455830641 | 0           |
| AP001258.4 | SNAI1    | -0.398883742 | 0           |
| AP001258.4 | FDCSP    | -0.001776026 | 0.970400636 |
| AP001258.4 | MT1X     | -0.363315812 | 4.57E-15    |
| AP001258.4 | ACACB    | -0.578933924 | 0           |
| AP001258.4 | ARC      | -0.186351722 | 8.81E-05    |
| AP001258.4 | KLK4     | -0.199676467 | 2.51E-05    |
| AP001258.4 | ZFPM2    | -0.291093479 | 6.12E-10    |
| AP001258.4 | AKAP12   | -0.229604388 | 1.24E-06    |
| AP001258.4 | GJB6     | -0.293150159 | 3.78E-10    |
| AP001258.4 | ERO1LB   | -0.521990854 | 0           |
| AP001258.4 | DNALI1   | -0.550039005 | 0           |
| AP001258.4 | HKDC1    | -0.385436163 | 0           |
| AP001258.4 | ZFP36L2  | -0.329598289 | 1.86E-12    |
| AP001258.4 | CAPSL    | -0.591347463 | 9.43E-43    |
| AP001258.4 | CYP7B1   | -0.385024836 | 0           |
| AP001258.4 | CPQ      | -0.455938153 | 0           |
| AP001258.4 | RPS6KA6  | -0.465125741 | 5.98E-25    |
| AP001258.4 | TLE1     | -0.515819237 | 0           |
| AP001258.4 | TP53INP2 | -0.594647067 | 0           |
| AP001258.4 | KATNAL2  | -0.63557488  | 0           |

|            |          |              |             |
|------------|----------|--------------|-------------|
| AP001258.4 | SGPP2    | -0.124593424 | 0.009004406 |
| AP001258.4 | CTH      | -0.464054216 | 0           |
| AP001258.4 | KIF12    | -0.347305378 | 9.31E-14    |
| AP001258.4 | TMEM220  | -0.480395697 | 0           |
| AP001258.4 | CENPJ    | -0.403688191 | 0           |
| AP001258.4 | FAM155B  | -0.539961761 | 0           |
| AP001258.4 | WFS1     | -0.639068329 | 0           |
| AP001258.4 | SELENBP1 | -0.48922747  | 0           |
| AP001258.4 | SNTA1    | -0.570660706 | 0           |
| AP001258.4 | FRAS1    | -0.148185052 | 0.001868916 |
| AP001258.4 | FBLN7    | -0.560908977 | 0           |
| AP001258.4 | AGPAT9   | -0.449423574 | 0           |
| AP001258.4 | GPR83    | -0.359327493 | 1.01E-14    |
| AP001258.4 | PRTG     | -0.359961222 | 8.92E-15    |
| AP001258.4 | EGR3     | -0.161111946 | 0.000713695 |
| AP001258.4 | GRAMD2   | -0.443368547 | 0           |
| AP001258.4 | HYOU1    | -0.562963346 | 0           |
| AP001258.4 | FBLN5    | -0.28731508  | 1.03E-09    |
| AP001258.4 | ITM2A    | -0.436576959 | 0           |
| AP001258.4 | SRF      | -0.446674061 | 0           |
| AP001258.4 | FGFR2    | -0.263943725 | 2.23E-08    |
| AP001258.4 | MT1A     | -0.326191231 | 2.43E-12    |
| AP001258.4 | MAMDC2   | -0.257865153 | 4.75E-08    |
| AP001258.4 | FHL2     | -0.458012805 | 0           |
| AP001258.4 | FTCDNL1  | -0.38284877  | 6.68E-18    |
| AP001258.4 | PKIA     | -0.216228295 | 5.10E-06    |
| AP001258.4 | DNAJB4   | -0.28377908  | 1.67E-09    |
| AP001258.4 | SLC25A33 | -0.643358902 | 0           |
| AP001258.4 | EYA2     | -0.270089244 | 1.02E-08    |
| AP001258.4 | LPAR1    | -0.257622895 | 4.89E-08    |
| AP001258.4 | STX11    | -0.246733775 | 1.80E-07    |
| AP001258.4 | ARHGEF28 | -0.415776402 | 0           |
| AP001258.4 | OR2W3    | -0.527507893 | 0           |
| AP001258.4 | ALDH1B1  | -0.48183295  | 6.71E-27    |
| AP001258.4 | CXCL12   | -0.149285708 | 0.001726701 |
| AP001258.4 | OLFM2    | -0.488460698 | 0           |
| AP001258.4 | TUB      | -0.307169867 | 6.04E-11    |
| AP001258.4 | HTRA3    | -0.24077931  | 3.58E-07    |
| AP001258.4 | CKB      | -0.593367696 | 0           |
| AP001258.4 | RGS2     | -0.152456052 | 0.001370695 |
| AP001258.4 | SHANK2   | -0.530476261 | 0           |
| AP001258.4 | CNTFR    | -0.538025786 | 2.62E-34    |
| AP001258.4 | CYTH3    | -0.378019216 | 1.25E-16    |
| AP001258.4 | PLAC9    | -0.351892391 | 4.08E-14    |
| AP001258.4 | WVOX     | -0.524259397 | 0           |
| AP001258.4 | NPR3     | -0.497016172 | 0           |
| AP001258.4 | SDC2     | -0.299103164 | 1.96E-10    |
| AP001258.4 | KLF15    | -0.434303168 | 0           |
| AP001258.4 | TMEM164  | -0.563184612 | 0           |
| AP001258.4 | LONRF3   | -0.127355276 | 0.007581913 |
| AP001258.4 | GBP1     | -0.085304255 | 0.074191464 |

|            |          |              |             |
|------------|----------|--------------|-------------|
| AP001258.4 | ARHGAP6  | -0.286111166 | 1.22E-09    |
| AP001258.4 | TMEM119  | -0.144471472 | 0.002431604 |
| AP001258.4 | SH3RF1   | -0.319711673 | 8.97E-12    |
| AP001258.4 | CRELD2   | -0.59582701  | 0           |
| AP001258.4 | PCP4     | 0.017862543  | 0.70887323  |
| AP001258.4 | GCSH     | -0.543825546 | 0           |
| AP001258.4 | IMPA2    | -0.481644431 | 0           |
| AP001258.4 | C1R      | -0.028984701 | 0.544574325 |
| AP001258.4 | SUCNR1   | -0.273627087 | 6.47E-09    |
| AP001258.4 | SFRP1    | -0.355691215 | 2.02E-14    |
| AP001258.4 | UGT8     | -0.476880831 | 0           |
| AP001258.4 | TLE4     | -0.221881498 | 2.84E-06    |
| AP001258.4 | ANTXR1   | -0.321522224 | 6.76E-12    |
| AP001258.4 | GPX3     | -0.453228071 | 0           |
| AP001258.4 | DPY19L2  | -0.544763089 | 0           |
| AP001258.4 | FAM46C   | -0.34767614  | 8.72E-14    |
| AP001258.4 | IL33     | -0.19458268  | 4.05E-05    |
| AP001258.4 | PEG3     | -0.463941739 | 0           |
| AP001258.4 | FAHD2A   | -0.56883512  | 0           |
| AP001258.4 | PTGDS    | -0.061008263 | 0.201939032 |
| AP001258.4 | CHCHD10  | -0.533095567 | 0           |
| AP001258.4 | CD36     | -0.551594108 | 0           |
| AP001258.4 | ANKRD37  | -0.482667361 | 0           |
| AP001258.4 | TSPAN33  | -0.549559312 | 0           |
| AP001258.4 | PRDM16   | -0.413836212 | 0           |
| AP001258.4 | UST      | -0.488216029 | 0           |
| AP001258.4 | NEXN     | -0.481780879 | 0           |
| AP001258.4 | NUPR1L   | -0.234074894 | 7.07E-07    |
| AP001258.4 | SLC24A3  | -0.592648865 | 0           |
| AP001258.4 | MARC1    | -0.563323329 | 0           |
| AP001258.4 | MYH11    | -0.244132907 | 2.44E-07    |
| AP001258.4 | APOA1    | -0.572620277 | 1.31E-39    |
| AP001258.4 | TMEM178B | -0.564904529 | 0           |
| AP001258.4 | CAPN6    | -0.283272922 | 1.52E-09    |
| AP001258.4 | PPM1L    | -0.636460086 | 0           |
| AP001258.4 | FZD8     | -0.618578962 | 0           |
| AP001258.4 | RCAN2    | -0.58242723  | 0           |
| AP001258.4 | COPZ2    | -0.567802829 | 0           |
| AP001258.4 | GAS1     | -0.230890851 | 1.08E-06    |
| AP001258.4 | DACT1    | -0.389712978 | 0           |
| AP001258.4 | WBSCR17  | -0.533308323 | 0           |
| AP001258.4 | NCS1     | -0.409338131 | 0           |
| AP001258.4 | SPIRE2   | -0.42922937  | 0           |
| AP001258.4 | C15orf52 | -0.46158242  | 0           |
| AP001258.4 | SPAG5    | -0.455413214 | 0           |
| AP001258.4 | ARL4D    | -0.517509085 | 0           |
| AP001258.4 | FAM189A2 | -0.282350497 | 2.03E-09    |
| AP001258.4 | MAP1LC3A | -0.601177532 | 0           |
| AP001258.4 | KLF6     | -0.055871206 | 0.242618628 |
| AP001258.4 | ADD3     | -0.235972024 | 6.17E-07    |
| AP001258.4 | TSPAN7   | -0.419229427 | 0           |

|            |          |              |             |
|------------|----------|--------------|-------------|
| AP001258.4 | KLF9     | -0.339171586 | 3.81E-13    |
| AP001258.4 | KCNQ1    | -0.622316938 | 0           |
| AP001258.4 | MAN1A1   | -0.116166454 | 0.014921465 |
| AP001258.4 | MLF1     | -0.22646539  | 1.75E-06    |
| AP001258.4 | RARB     | -0.54262688  | 0           |
| AP001258.4 | CDC42EP2 | -0.398361639 | 0           |
| AP001258.4 | FAM3B    | -0.160724731 | 0.000735351 |
| AP001258.4 | GADD45B  | -0.354938343 | 2.33E-14    |
| AP001258.4 | TMEM47   | -0.477181668 | 0           |
| AP001258.4 | SDF2L1   | -0.555804685 | 0           |
| AP001258.4 | CCDC85A  | -0.249670654 | 1.27E-07    |
| AP001258.4 | CRYBG3   | -0.091257159 | 0.056080481 |
| AP001258.4 | FBLN2    | -0.027512432 | 0.565207368 |
| AP001258.4 | PEBP4    | -0.328144316 | 2.36E-12    |
| AP001258.4 | CDADC1   | -0.55454205  | 0           |
| AP001258.4 | FAM63A   | -0.43972929  | 0           |
| AP001258.4 | GLUL     | -0.332841679 | 1.10E-12    |
| AP001258.4 | FREM2    | -0.405492501 | 0           |
| AP001258.4 | ACKR3    | -0.451958487 | 0           |
| AP001258.4 | DENND6A  | -0.541139718 | 0           |
| AP001258.4 | CLDN8    | -0.037119628 | 0.437721603 |
| AP001258.4 | UTS2R    | -0.161295718 | 0.000693536 |
| AP001258.4 | SCNN1B   | -0.275790671 | 4.87E-09    |
| AP001258.4 | TTC30A   | -0.478014394 | 0           |
| AP001258.4 | CORO2B   | -0.536549159 | 0           |
| AP001258.4 | TC2N     | -0.286880065 | 1.10E-09    |
| AP001258.4 | ALDH2    | -0.597969885 | 0           |
| AP001258.4 | GPR183   | -0.062308059 | 0.192481608 |
| AP001258.4 | C4orf47  | -0.439395547 | 0           |
| AP001258.4 | SLC25A42 | -0.606472028 | 0           |
| AP001258.4 | LGMN     | -0.607330143 | 0           |
| AP001258.4 | ACSF2    | -0.591344815 | 0           |
| AP001258.4 | KIAA1467 | -0.525855632 | 0           |
| AP001258.4 | PRKG1    | -0.534199202 | 0           |
| AP001258.4 | GNAI1    | -0.570946649 | 0           |
| AP001258.4 | ABCC4    | -0.331676345 | 1.33E-12    |
| AP001258.4 | PRPS1    | -0.506097862 | 0           |
| AP001258.4 | TSPAN5   | -0.302355915 | 1.23E-10    |
| AP001258.4 | CR2      | -0.155156795 | 0.001108639 |
| AP001258.4 | CCDC170  | -0.373990616 | 4.10E-16    |
| AP001258.4 | RRAD     | -0.217899846 | 4.30E-06    |
| AP001258.4 | SCGB2A1  | -0.460391272 | 0           |
| AP001258.4 | SESN3    | -0.238455025 | 4.66E-07    |
| AP001258.4 | SGK223   | -0.165722646 | 0.000497431 |
| AP001258.4 | NDRG2    | -0.614110525 | 0           |
| AP001258.4 | C3orf52  | -0.397040426 | 0           |
| AP001258.4 | FLRT3    | 0.304549993  | 8.90E-11    |
| AP001258.4 | MST1R    | 0.614579722  | 0           |
| AP001258.4 | SDC1     | 0.116002065  | 0.015064823 |
| AP001258.4 | ST8SIA4  | 0.494036174  | 0           |
| AP001258.4 | UBTD1    | 0.31121719   | 3.30E-11    |

|            |          |              |             |
|------------|----------|--------------|-------------|
| AP001258.4 | EPHA2    | 0.323961398  | 4.60E-12    |
| AP001258.4 | TMEM130  | 0.34324061   | 1.90E-13    |
| AP001258.4 | SPINK2   | 0.391523246  | 0           |
| AP001258.4 | MMP16    | 0.57777171   | 0           |
| AP001258.4 | SIGLEC15 | 0.468398545  | 0           |
| AP001258.4 | RIN1     | 0.512645064  | 0           |
| AP001258.4 | IL1RN    | 0.467755881  | 0           |
| AP001258.4 | FCER1G   | 0.275541889  | 5.03E-09    |
| AP001258.4 | CD276    | 0.565641941  | 0           |
| AP001258.4 | CTSB     | 0.57260047   | 0           |
| AP001258.4 | FAM171A2 | 0.231264591  | 1.04E-06    |
| AP001258.4 | ASPHD1   | 0.584255511  | 0           |
| AP001258.4 | C15orf48 | 0.480669443  | 0           |
| AP001258.4 | DYSF     | 0.187546842  | 7.93E-05    |
| AP001258.4 | PDZRN4   | 0.207673105  | 1.20E-05    |
| AP001258.4 | EFHD2    | 0.195570426  | 3.82E-05    |
| AP001258.4 | ASF1B    | 0.35071727   | 5.06E-14    |
| AP001258.4 | AQP1     | 0.170150234  | 0.000348618 |
| AP001258.4 | ARRDC2   | 0.491178014  | 0           |
| AP001258.4 | PRSS1    | 0.527407059  | 8.44E-33    |
| AP001258.4 | MAPK13   | 0.478108006  | 0           |
| AP001258.4 | CST5     | 0.55321683   | 1.47E-36    |
| AP001258.4 | AHR      | 0.512761229  | 0           |
| AP001258.4 | BAX      | 0.302462434  | 1.21E-10    |
| AP001258.4 | C1orf115 | 0.387028711  | 0           |
| AP001258.4 | PLK3     | 0.320660848  | 7.73E-12    |
| AP001258.4 | JAG2     | 0.239531852  | 4.13E-07    |
| AP001258.4 | RAD23B   | 0.719367293  | 0           |
| AP001258.4 | CA12     | -0.186926588 | 8.37E-05    |
| AP001258.4 | ADTRP    | 0.514704965  | 0           |
| AP001258.4 | UCP2     | 0.435363117  | 0           |
| AP001258.4 | IGFBP2   | 0.136726456  | 0.004130908 |
| AP001258.4 | LOXL2    | 0.234862432  | 6.98E-07    |
| AP001258.4 | GPX1     | 0.187846544  | 7.72E-05    |
| AP001258.4 | P3H3     | 0.343958306  | 1.67E-13    |
| AP001258.4 | C2orf81  | 0.438447933  | 0           |
| AP001258.4 | CDT1     | 0.421740512  | 0           |
| AP001258.4 | SNX25    | 0.347909888  | 8.36E-14    |
| AP001258.4 | MTHFD1L  | 0.508108545  | 0           |
| AP001258.4 | CDC42BPG | 0.587693238  | 4.01E-42    |
| AP001258.4 | MSN      | 0.627228758  | 0           |
| AP001258.4 | SIGLEC6  | 0.503835843  | 1.23E-29    |
| AP001258.4 | F2R      | 0.149920004  | 0.001649322 |
| AP001258.4 | TMEM184A | 0.484555213  | 0           |
| AP001258.4 | CKS2     | 0.238305103  | 4.74E-07    |
| AP001258.4 | TAX1BP3  | 0.450548059  | 0           |
| AP001258.4 | PMEPA1   | 0.504936925  | 0           |
| AP001258.4 | CXCL16   | 0.510473679  | 0           |
| AP001258.4 | FAXC     | 0.551536096  | 0           |
| AP001258.4 | VTCN1    | 0.507998945  | 3.53E-30    |
| AP001258.4 | SH2D4A   | 0.50451808   | 0           |

|            |          |             |             |
|------------|----------|-------------|-------------|
| AP001258.4 | RNF24    | 0.483402928 | 0           |
| AP001258.4 | LY6G6C   | 0.549354978 | 5.63E-36    |
| AP001258.4 | NID1     | 0.354446594 | 2.55E-14    |
| AP001258.4 | STAC     | 0.669357648 | 0           |
| AP001258.4 | RAB34    | 0.513839191 | 0           |
| AP001258.4 | HES4     | 0.254326458 | 7.30E-08    |
| AP001258.4 | EPHA10   | 0.714728935 | 0           |
| AP001258.4 | ENTPD2   | 0.561346971 | 0           |
| AP001258.4 | DDB2     | 0.487726975 | 0           |
| AP001258.4 | NKAIN4   | 0.18484995  | 0.000100603 |
| AP001258.4 | TRIM29   | 0.397787199 | 0           |
| AP001258.4 | ADCY8    | 0.659964157 | 3.09E-56    |
| AP001258.4 | SFTA2    | 0.353136303 | 3.25E-14    |
| AP001258.4 | NRIP1    | 0.618093595 | 0           |
| AP001258.4 | VWA1     | 0.040075798 | 0.402094538 |
| AP001258.4 | APLNR    | 0.239841483 | 3.99E-07    |
| AP001258.4 | REN      | 0.535202937 | 6.68E-34    |
| AP001258.4 | EDIL3    | 0.201141505 | 2.26E-05    |
| AP001258.4 | AGRN     | 0.360279221 | 8.38E-15    |
| AP001258.4 | TREM1    | 0.312982069 | 2.52E-11    |
| AP001258.4 | SRL      | 0.280207479 | 2.71E-09    |
| AP001258.4 | RASGRF1  | 0.55171708  | 0           |
| AP001258.4 | RMI2     | 0.551588292 | 0           |
| AP001258.4 | SAMD1    | 0.370679003 | 9.27E-16    |
| AP001258.4 | MGAT4B   | 0.593607542 | 0           |
| AP001258.4 | NXN      | 0.532332625 | 0           |
| AP001258.4 | SH3BGRL3 | 0.420561703 | 0           |
| AP001258.4 | CA11     | 0.353702942 | 2.93E-14    |
| AP001258.4 | PLD3     | 0.163645158 | 0.000585972 |
| AP001258.4 | LURAP1L  | 0.495859916 | 0           |
| AP001258.4 | CARNS1   | 0.302584556 | 1.19E-10    |
| AP001258.4 | PDLIM7   | 0.369728694 | 1.16E-15    |
| AP001258.4 | BCL2L1   | 0.495157255 | 0           |
| AP001258.4 | GGT6     | 0.308231943 | 5.16E-11    |
| AP001258.4 | DPYSL3   | 0.368377412 | 1.57E-15    |
| AP001258.4 | FYN      | 0.504742183 | 0           |
| AP001258.4 | TK1      | 0.287584003 | 9.95E-10    |
| AP001258.4 | AK1      | 0.141596859 | 0.002969006 |
| AP001258.4 | HIGD1B   | 0.097039717 | 0.042165091 |
| AP001258.4 | TMEM59L  | 0.363980744 | 3.99E-15    |
| AP001258.4 | MEGF9    | 0.558357327 | 0           |
| AP001258.4 | ZFP36L1  | 0.464944386 | 0           |
| AP001258.4 | ADRA1B   | 0.333479236 | 9.87E-13    |
| AP001258.4 | EPHA4    | 0.564825101 | 0           |
| AP001258.4 | TCERG1L  | 0.36844677  | 1.54E-15    |
| AP001258.4 | NGFR     | 0.426990471 | 0           |
| AP001258.4 | EBI3     | 0.57847579  | 0           |
| AP001258.4 | S100A10  | 0.368025372 | 1.69E-15    |
| AP001258.4 | S100B    | 0.452427259 | 0           |
| AP001258.4 | CD44     | 0.260234542 | 3.55E-08    |
| AP001258.4 | BHLHE41  | 0.651670274 | 0           |



|            |          |             |             |
|------------|----------|-------------|-------------|
| AP001258.4 | FBX02    | 0.373809774 | 4.30E-16    |
| AP001258.4 | SLC30A2  | 0.312729032 | 2.62E-11    |
| AP001258.4 | FRMD5    | 0.572638483 | 0           |
| AP001258.4 | SAMD11   | 0.364517598 | 3.57E-15    |
| AP001258.4 | SIPA1L2  | 0.454215967 | 0           |
| AP001258.4 | S100A16  | 0.464481287 | 0           |
| AP001258.4 | PPL      | 0.638598422 | 0           |
| AP001258.4 | ARHGDIB  | 0.092232431 | 0.05349635  |
| AP001258.4 | CDC42EP3 | 0.525368989 | 0           |
| AP001258.4 | RUNX2    | 0.594588204 | 0           |
| AP001258.4 | LAMC2    | 0.523763677 | 0           |
| AP001258.4 | BRINP1   | 0.569005041 | 0           |
| AP001258.4 | GPRC5B   | 0.697342398 | 0           |
| AP001258.4 | AQP5     | 0.140758176 | 0.003145016 |
| AP001258.4 | PLAG1    | 0.514321862 | 0           |
| AP001258.4 | PTPRU    | 0.50752602  | 0           |
| AP001258.4 | ANGPTL4  | 0.326874449 | 2.89E-12    |
| AP001258.4 | PALM3    | 0.481468411 | 0           |
| AP001258.4 | ACP5     | 0.328446571 | 2.24E-12    |
| AP001258.4 | DLG4     | 0.383913258 | 0           |
| AP001258.4 | ETNK2    | 0.57181682  | 0           |
| AP001258.4 | CD109    | 0.557485171 | 0           |
| AP001258.4 | SNX22    | 0.475015106 | 0           |
| AP001258.4 | TMEM98   | 0.619521186 | 0           |
| AP001258.4 | CTHRC1   | 0.385888198 | 0           |
| AP001258.4 | S100A2   | 0.414833044 | 0           |
| AP001258.4 | C11orf80 | 0.66038106  | 0           |
| AP001258.4 | SREBF1   | 0.332818275 | 1.10E-12    |
| AP001258.4 | PRSS22   | 0.617351787 | 0           |
| AP001258.4 | CMTM3    | 0.433480797 | 0           |
| AP001258.4 | RDH5     | 0.624924614 | 0           |
| AP001258.4 | MYH10    | 0.4797258   | 0           |
| AP001258.4 | EVPL     | 0.450515011 | 0           |
| AP001258.4 | SCD      | 0.366975777 | 2.13E-15    |
| AP001258.4 | CD151    | 0.412574855 | 0           |
| AP001258.4 | S100A4   | 0.277909009 | 3.68E-09    |
| AP001258.4 | BNIP1    | 0.521582931 | 0           |
| AP001258.4 | MAP3K6   | 0.497290627 | 0           |
| AP001258.4 | MANEAL   | 0.433549588 | 0           |
| AP001258.4 | CD207    | 0.463389754 | 9.41E-25    |
| AP001258.4 | CD1A     | 0.491750341 | 4.14E-28    |
| AP001258.4 | C3       | 0.432712749 | 0           |
| AP001258.4 | NT5E     | 0.438198158 | 0           |
| AP001258.4 | CACNG4   | 0.590231386 | 1.47E-42    |
| AP001258.4 | FHOD1    | 0.498351711 | 0           |
| AP001258.4 | LEMD1    | 0.536432711 | 0           |
| AP001258.4 | ATP11A   | 0.335963939 | 6.53E-13    |
| AP001258.4 | PPAP2C   | 0.365563363 | 2.87E-15    |
| AP001258.4 | DRAM1    | 0.597180987 | 0           |
| AP001258.4 | CDA      | 0.134100341 | 0.004915553 |
| AP001258.4 | CCND2    | 0.34527427  | 1.33E-13    |

|            |          |              |             |
|------------|----------|--------------|-------------|
| AP001258.4 | LCN6     | 0.383460315  | 7.94E-17    |
| AP001258.4 | CDH4     | 0.621667749  | 0           |
| AP001258.4 | MMP11    | 0.495775665  | 0           |
| AP001258.4 | B3GAT1   | 0.457710834  | 0           |
| AP001258.4 | SPP1     | 0.313246028  | 2.43E-11    |
| AP001258.4 | HLA-DQB1 | 0.312102395  | 2.88E-11    |
| AP001258.4 | SDC3     | 0.500483948  | 0           |
| AP001258.4 | CX3CL1   | 0.327924894  | 2.44E-12    |
| AP001258.4 | SDK1     | 0.503746486  | 0           |
| AP001258.4 | DOCK9    | 0.667734748  | 0           |
| AP001258.4 | CSF2     | 0.570069128  | 3.38E-39    |
| AP001258.4 | GRHL3    | 0.585519564  | 0           |
| AP001258.4 | TMEM92   | 0.657444764  | 1.12E-55    |
| AP001258.4 | BASP1    | 0.5723341    | 0           |
| AP001258.4 | HRH1     | 0.605144716  | 0           |
| AP001258.4 | ESM1     | -0.061844961 | 0.195813197 |
| AP001258.4 | B4GALNT3 | 0.576360573  | 0           |
| AP001258.4 | LMO3     | 0.365068068  | 3.19E-15    |
| AP001258.4 | C9orf16  | 0.38953781   | 0           |
| AP001258.4 | SEMA3F   | 0.211059467  | 8.60E-06    |
| AP001258.4 | PLA2G12B | 0.321542918  | 5.13E-12    |
| AP001258.4 | KLK6     | 0.556525922  | 4.58E-37    |
| AP001258.4 | ST3GAL5  | 0.321540521  | 6.74E-12    |
| AP001258.4 | FAM132B  | 0.28566594   | 1.29E-09    |
| AP001258.4 | CDKN1A   | 0.162190192  | 0.000656465 |
| AP001258.4 | E2F1     | 0.399482578  | 0           |
| AP001258.4 | B3GNT8   | 0.313744869  | 2.25E-11    |
| AP001258.4 | MTMR11   | 0.665200827  | 0           |
| AP001258.4 | MYO1G    | 0.398877075  | 0           |
| AP001258.4 | TMSB10   | 0.452370382  | 0           |
| AP001258.4 | UNC5CL   | 0.619260773  | 0           |
| AP001258.4 | ABR      | 0.497951304  | 0           |
| AP001258.4 | PLP2     | 0.450114179  | 0           |
| AP001258.4 | SRCIN1   | 0.481225728  | 0           |
| AP001258.4 | PDE9A    | 0.537987955  | 0           |
| AP001258.4 | TREM2    | 0.311337184  | 3.24E-11    |
| AP001258.4 | KDEL3    | 0.338456301  | 4.30E-13    |
| AP001258.4 | PC       | 0.601326745  | 0           |
| AP001258.4 | C2CD4A   | 0.683449309  | 0           |
| AP001258.4 | PELI1    | 0.47547792   | 0           |
| AP001258.4 | SSX1     | 0.262096863  | 2.82E-08    |
| AP001258.4 | MROH6    | 0.456611596  | 0           |
| AP001258.4 | ESPN     | 0.496794481  | 0           |
| AP001258.4 | BMP1     | 0.400921941  | 0           |
| AP001258.4 | TM4SF4   | 0.452700049  | 1.44E-23    |
| AP001258.4 | CORO2A   | 0.613662462  | 0           |
| AP001258.4 | CD164L2  | 0.467997588  | 2.81E-25    |
| AP001258.4 | CTSS     | 0.451995081  | 0           |
| AP001258.4 | CLU      | 0.556264379  | 0           |
| AP001258.4 | TMSB4X   | 0.399177345  | 0           |
| AP001258.4 | WNT10A   | 0.58754587   | 4.25E-42    |

|            |          |             |             |
|------------|----------|-------------|-------------|
| AP001258.4 | NAPSA    | 0.344377151 | 1.56E-13    |
| AP001258.4 | PLEKHA4  | 0.634435928 | 0           |
| AP001258.4 | SFTPA1   | 0.067708914 | 0.156705189 |
| AP001258.4 | C1orf116 | 0.499794478 | 0           |
| AP001258.4 | TM4SF1   | 0.394664796 | 0           |
| AP001258.4 | SEL1L3   | 0.605346125 | 0           |
| AP001258.4 | VASN     | 0.605071812 | 0           |
| AP001258.4 | NPTXR    | 0.655196912 | 0           |
| AP001258.4 | PDE4C    | 0.455814046 | 0           |
| AP001258.4 | CDC42EP1 | 0.545229166 | 0           |
| AP001258.4 | ENDOD1   | 0.700696704 | 0           |
| AP001258.4 | RYR1     | 0.474326628 | 0           |
| AP001258.4 | IL1RAP   | 0.608138756 | 0           |
| AP001258.4 | SLC35F2  | 0.648988724 | 7.63E-54    |
| AP001258.4 | ISYNA1   | 0.382326101 | 1.33E-17    |
| AP001258.4 | HLA-G    | 0.502352511 | 0           |
| AP001258.4 | CDKN2B   | 0.483267757 | 0           |
| AP001258.4 | ALDH1A3  | 0.430041246 | 0           |
| AP001258.4 | CLIP3    | 0.529772323 | 0           |
| AP001258.4 | ULBP2    | 0.504073279 | 0           |
| AP001258.4 | ETHE1    | 0.649763274 | 0           |
| AP001258.4 | XPR1     | 0.501004349 | 0           |
| AP001258.4 | SPTBN2   | 0.649244434 | 0           |
| AP001258.4 | IVL      | 0.501116719 | 2.74E-29    |
| AP001258.4 | MARCO    | 0.414688228 | 0           |
| AP001258.4 | PLXND1   | 0.318080405 | 1.16E-11    |
| AP001258.4 | EMILIN2  | 0.379785514 | 6.40E-17    |
| AP001258.4 | PLAUR    | 0.405919431 | 0           |
| AP001258.4 | CDC42EP5 | 0.556613724 | 0           |
| AP001258.4 | TRPC5    | 0.453000953 | 1.34E-23    |
| AP001258.4 | TMEM100  | 0.437616909 | 0           |
| AP001258.4 | QSOX1    | 0.580839222 | 0           |
| AP001258.4 | ARHGAP23 | 0.479769061 | 0           |
| AP001258.4 | MDFI     | 0.293836609 | 4.16E-10    |
| AP001258.4 | FSTL3    | 0.605974038 | 0           |
| AP001258.4 | INF2     | 0.513655228 | 0           |
| AP001258.4 | TGFBR1   | 0.754417659 | 0           |
| AP001258.4 | TGFBI    | 0.341737562 | 2.46E-13    |
| AP001258.4 | ERBB3    | 0.710511975 | 0           |
| AP001258.4 | CCL18    | 0.294819966 | 3.62E-10    |
| AP001258.4 | CCL17    | 0.439301454 | 3.87E-22    |
| AP001258.4 | C16orf45 | 0.541250777 | 0           |
| AP001258.4 | PRDM1    | 0.372423883 | 6.10E-16    |
| AP001258.4 | TRIM47   | 0.49592119  | 0           |
| AP001258.4 | CNFN     | 0.404651549 | 0           |
| AP001258.4 | ARMCX3   | 0.63055186  | 0           |
| AP001258.4 | RAMP1    | 0.44217442  | 0           |
| AP001258.4 | GABRD    | 0.123697155 | 0.009514638 |
| AP001258.4 | COL13A1  | 0.307971247 | 5.36E-11    |
| AP001258.4 | S100A5   | 0.437783568 | 0           |
| AP001258.4 | MISP     | 0.469019508 | 0           |

|            |           |             |             |
|------------|-----------|-------------|-------------|
| AP001258.4 | HES6      | 0.274330458 | 5.90E-09    |
| AP001258.4 | PSD3      | 0.587403019 | 0           |
| AP001258.4 | DOK7      | 0.554087321 | 0           |
| AP001258.4 | ZMAT3     | 0.467732762 | 0           |
| AP001258.4 | MFAP2     | 0.480609446 | 0           |
| AP001258.4 | TMEM79    | 0.615953982 | 0           |
| AP001258.4 | SLC1A5    | 0.463232837 | 0           |
| AP001258.4 | BBC3      | 0.454364612 | 0           |
| AP001258.4 | HLA-DQB2  | 0.403903783 | 0           |
| AP001258.4 | C1QL1     | 0.530800926 | 0           |
| AP001258.4 | TMEM215   | 0.348384007 | 5.68E-14    |
| AP001258.4 | PNP       | 0.519580616 | 0           |
| AP001258.4 | ARNTL     | 0.732054341 | 0           |
| AP001258.4 | CLDN2     | 0.498906808 | 5.24E-29    |
| AP001258.4 | MVP       | 0.533309883 | 0           |
| AP001258.4 | LGALS1    | 0.391984926 | 0           |
| AP001258.4 | BIRC7     | 0.397863506 | 4.21E-18    |
| AP001258.4 | COL8A1    | 0.682067531 | 0           |
| AP001258.4 | PERP      | 0.626884803 | 0           |
| AP001258.4 | GJA4      | 0.277550444 | 3.86E-09    |
| AP001258.4 | IGFL2     | 0.508053604 | 3.47E-30    |
| AP001258.4 | DAPK2     | 0.646455774 | 0           |
| AP001258.4 | MAMLD1    | 0.71435335  | 0           |
| AP001258.4 | ETV5      | 0.299211811 | 1.93E-10    |
| AP001258.4 | RUNX1     | 0.598517093 | 0           |
| AP001258.4 | LONRF2    | 0.49020487  | 0           |
| AP001258.4 | SPOCK1    | 0.176303129 | 0.000209671 |
| AP001258.4 | XKRX      | 0.476262989 | 0           |
| AP001258.4 | TGFB1     | 0.287069702 | 1.07E-09    |
| AP001258.4 | ERP27     | 0.409570319 | 0           |
| AP001258.4 | TNFRSF10C | 0.367059319 | 2.09E-15    |
| AP001258.4 | PALM      | 0.647908611 | 0           |
| AP001258.4 | TSC22D1   | 0.505599163 | 0           |
| AP001258.4 | TGM2      | 0.458001458 | 0           |
| AP001258.4 | UBE2QL1   | 0.431467844 | 0           |
| AP001258.4 | ECE1      | 0.577243225 | 0           |
| AP001258.4 | COL8A2    | 0.57409359  | 0           |
| AP001258.4 | HIST3H2A  | 0.456458696 | 0           |
| AP001258.4 | TNFRSF21  | 0.49548348  | 0           |
| AP001258.4 | SOX4      | 0.595858356 | 0           |
| AP001258.4 | ELF3      | 0.562232034 | 0           |
| AP001258.4 | TPD52L1   | 0.635334041 | 0           |
| AP001258.4 | INHBB     | 0.571067495 | 0           |
| AP001258.4 | HPN       | 0.393327981 | 0           |
| AP001258.4 | MMP7      | 0.492965857 | 2.93E-28    |
| AP001258.4 | RAB27A    | 0.600581816 | 0           |
| AP001258.4 | IGF2BP2   | 0.608231092 | 0           |
| AP001258.4 | ITGB4     | 0.475241336 | 0           |
| AP001258.4 | PPP1R1B   | 0.527471725 | 0           |
| AP001258.4 | NPDC1     | 0.285092918 | 1.40E-09    |
| AP001258.4 | CCL13     | 0.526057582 | 1.30E-32    |

|            |            |             |             |
|------------|------------|-------------|-------------|
| AP001258.4 | SPINT1     | 0.596863981 | 0           |
| AP001258.4 | HEY2       | 0.405621715 | 0           |
| AP001258.4 | CST2       | 0.518112724 | 1.60E-31    |
| AP001258.4 | ADM        | 0.293281033 | 4.50E-10    |
| AP001258.4 | VSTM2L     | 0.297633873 | 2.43E-10    |
| AP001258.4 | FAM84A     | 0.514837724 | 0           |
| AP001258.4 | P4HA2      | 0.430760928 | 0           |
| AP001258.4 | LPL        | 0.327878797 | 2.46E-12    |
| AP001258.4 | TMEM173    | 0.311112797 | 3.35E-11    |
| AP001258.4 | DHRS3      | 0.581224735 | 0           |
| AP001258.4 | SCN1B      | 0.433676532 | 0           |
| AP001258.4 | GLT1D1     | 0.310723029 | 3.55E-11    |
| AP001258.4 | PHYHIP     | 0.46668416  | 0           |
| AP001258.4 | BHLHE40    | 0.488709197 | 0           |
| AP001258.4 | BID        | 0.608401013 | 0           |
| AP001258.4 | POSTN      | 0.373775591 | 4.33E-16    |
| AP001258.4 | ITGA3      | 0.69442495  | 0           |
| AP001258.4 | RSP04      | 0.677327051 | 0           |
| AP001258.4 | ADAMTS9    | 0.332121571 | 1.23E-12    |
| AP001258.4 | ABTB2      | 0.735569774 | 0           |
| AP001258.4 | KCNQ3      | 0.71759291  | 0           |
| AP001258.4 | ANXA1      | 0.585112633 | 0           |
| AP001258.4 | S100A11    | 0.494582105 | 0           |
| AP001258.4 | CEACAM6    | 0.463901445 | 8.24E-25    |
| AP001258.4 | IER5L      | 0.542838785 | 0           |
| AP001258.4 | KRT80      | 0.478900025 | 0           |
| AP001258.4 | CDH6       | 0.500344948 | 0           |
| AP001258.4 | UNC5B      | 0.399253228 | 0           |
| AP001258.4 | PLEKHN1    | 0.615432305 | 0           |
| AP001258.4 | SYTL1      | 0.299590516 | 1.83E-10    |
| AP001258.4 | TMEM163    | 0.565154021 | 0           |
| AP001258.4 | C4orf48    | 0.162976537 | 0.000617445 |
| AP001258.4 | B3GNT7     | 0.37667304  | 1.93E-16    |
| AP001258.4 | BAIAP3     | 0.565778955 | 0           |
| AP001258.4 | PHLDA2     | 0.408146416 | 0           |
| AP001258.4 | GAP43      | 0.662142506 | 1.01E-56    |
| AP001258.4 | S100A1     | 0.389632699 | 0           |
| AP001258.4 | PTPRE      | 0.740171112 | 0           |
| AP001258.4 | CCND1      | 0.44057932  | 0           |
| AP001258.4 | ST6GALNAC5 | 0.630219415 | 5.65E-50    |
| AP001258.4 | KRT17      | 0.216130853 | 5.15E-06    |
| AP001258.4 | HPCAL4     | 0.532043561 | 0           |
| AP001258.4 | GABBR2     | 0.468989297 | 0           |
| AP001258.4 | DIRAS3     | 0.476689777 | 0           |
| AP001258.4 | SERINC2    | 0.299409958 | 1.88E-10    |
| AP001258.4 | PTCHD4     | 0.366298788 | 2.46E-15    |
| AP001258.4 | EPS8       | 0.586327184 | 0           |
| AP001258.4 | LY6E       | 0.506575569 | 0           |
| AP001258.4 | UPP1       | 0.531331255 | 0           |
| AP001258.4 | AHNAK2     | 0.605538598 | 0           |
| AP001258.4 | PLXNC1     | 0.689002942 | 0           |

|            |         |             |            |
|------------|---------|-------------|------------|
| AP001258.4 | TNC     | 0.432358581 | 0          |
| AP001258.4 | DUSP4   | 0.338955001 | 3.95E-13   |
| AP001258.4 | NRCAM   | 0.62119997  | 0          |
| AP001258.4 | NRP2    | 0.559561525 | 0          |
| AP001258.4 | CTSC    | 0.571412868 | 0          |
| AP001258.4 | AMIGO2  | 0.481332106 | 0          |
| AP001258.4 | NAB2    | 0.510285745 | 0          |
| AP001258.4 | TBC1D2  | 0.668394148 | 0          |
| AP001258.4 | PHLDA3  | 0.394732027 | 0          |
| AP001258.4 | PTP4A3  | 0.416662459 | 0          |
| AP001258.4 | CRABP2  | 0.339918075 | 3.35E-13   |
| AP001258.4 | GOS2    | 0.408508526 | 0          |
| AP001258.4 | S100A6  | 0.551147604 | 0          |
| AP001258.4 | FOXQ1   | 0.575772232 | 0          |
| AP001258.4 | LRG1    | 0.584717616 | 0          |
| AP001258.4 | LAMP5   | 0.495841052 | 0          |
| AP001258.4 | ALDH3B1 | 0.503717551 | 0          |
| AP001258.4 | CDH2    | 0.084699887 | 0.07627072 |
| AP001258.4 | SCG5    | 0.348643612 | 7.34E-14   |
| AP001258.4 | ZCCHC16 | 0.462454381 | 1.20E-24   |
| AP001258.4 | GRB7    | 0.687622866 | 0          |
| AP001258.4 | TIAM1   | 0.560108307 | 0          |
| AP001258.4 | FXD5    | 0.280684903 | 2.54E-09   |
| AP001258.4 | CLDN9   | 0.508811064 | 0          |
| AP001258.4 | FAM43A  | 0.608904819 | 0          |
| AP001258.4 | CHST2   | 0.504166466 | 0          |
| AP001258.4 | HMGA2   | 0.46131761  | 0          |
| AP001258.4 | GALNT7  | 0.612210617 | 0          |
| AP001258.4 | CBLN1   | 0.460820471 | 0          |
| AP001258.4 | STRA6   | 0.48489009  | 0          |
| AP001258.4 | MUC21   | 0.504614411 | 9.73E-30   |
| AP001258.4 | PRR36   | 0.543566268 | 0          |
| AP001258.4 | NFE2L3  | 0.471361523 | 0          |
| AP001258.4 | NR1D1   | 0.316159079 | 1.55E-11   |
| AP001258.4 | MUC1    | 0.548691978 | 0          |
| AP001258.4 | NAT8L   | 0.314301154 | 2.07E-11   |
| AP001258.4 | APOC1   | 0.227833409 | 1.51E-06   |
| AP001258.4 | EVA1A   | 0.620149808 | 0          |
| AP001258.4 | ENTPD1  | 0.379271922 | 7.91E-17   |
| AP001258.4 | COL1A1  | 0.465181679 | 0          |
| AP001258.4 | FNDC4   | 0.331509686 | 1.36E-12   |
| AP001258.4 | FRMD3   | 0.365784203 | 2.74E-15   |
| AP001258.4 | SHROOM4 | 0.686974813 | 0          |
| AP001258.4 | NELL2   | 0.3989392   | 0          |
| AP001258.4 | EPHB3   | 0.568300678 | 0          |
| AP001258.4 | TMC6    | 0.497143826 | 0          |
| AP001258.4 | NOD1    | 0.716616362 | 0          |
| AP001258.4 | GGCT    | 0.75354295  | 0          |
| AP001258.4 | ICAM1   | 0.604518931 | 0          |
| AP001258.4 | PRSS23  | 0.444150779 | 0          |
| AP001258.4 | CFI     | 0.568596975 | 0          |

|            |           |             |             |
|------------|-----------|-------------|-------------|
| AP001258.4 | CD55      | 0.575528272 | 0           |
| AP001258.4 | RASD2     | 0.563976915 | 0           |
| AP001258.4 | KLK11     | 0.50611159  | 6.22E-30    |
| AP001258.4 | ICAM5     | 0.566873371 | 0           |
| AP001258.4 | ADORA1    | 0.462010626 | 0           |
| AP001258.4 | ITGA2     | 0.65940054  | 0           |
| AP001258.4 | ABCC3     | 0.460528712 | 0           |
| AP001258.4 | MFGE8     | 0.560355954 | 0           |
| AP001258.4 | STK32A    | 0.462493156 | 0           |
| AP001258.4 | CYSLTR2   | 0.500961514 | 0           |
| AP001258.4 | LAD1      | 0.576572761 | 0           |
| AP001258.4 | MGAT3     | 0.590576341 | 0           |
| AP001258.4 | IGFBP6    | 0.483725182 | 0           |
| AP001258.4 | CYP2S1    | 0.599509953 | 0           |
| AP001258.4 | KCNJ2     | 0.477432578 | 0           |
| AP001258.4 | FAM20A    | 0.469153828 | 0           |
| AP001258.4 | TGFA      | 0.506909454 | 0           |
| AP001258.4 | MXRA8     | 0.610331984 | 0           |
| AP001258.4 | C8orf4    | 0.349122737 | 6.74E-14    |
| AP001258.4 | CLDN10    | 0.650475164 | 3.67E-54    |
| AP001258.4 | PDE5A     | 0.687926682 | 0           |
| AP001258.4 | APOE      | 0.264331507 | 2.13E-08    |
| AP001258.4 | SPOCK2    | 0.490288837 | 0           |
| AP001258.4 | TENM1     | 0.357495525 | 1.44E-14    |
| AP001258.4 | SLIT1     | 0.191338574 | 5.64E-05    |
| AP001258.4 | CXCL14    | 0.370463836 | 9.75E-16    |
| AP001258.4 | ECM1      | 0.113159649 | 0.017742068 |
| AP001258.4 | DUSP5     | 0.554049025 | 0           |
| AP001258.4 | SEZ6L2    | 0.481687124 | 0           |
| AP001258.4 | THRSP     | 0.185868199 | 9.20E-05    |
| AP001258.4 | C19orf33  | 0.457834516 | 0           |
| AP001258.4 | MPZL2     | 0.568907315 | 0           |
| AP001258.4 | CTSH      | 0.604185472 | 0           |
| AP001258.4 | CYP1B1    | 0.66118329  | 0           |
| AP001258.4 | ALOX5     | 0.526005271 | 0           |
| AP001258.4 | SYTL5     | 0.597713465 | 7.22E-44    |
| AP001258.4 | TNFRSF12A | 0.48882139  | 0           |
| AP001258.4 | DUSP6     | 0.51783219  | 0           |
| AP001258.4 | ALOX15B   | 0.568628605 | 0           |
| AP001258.4 | SDC4      | 0.635066536 | 0           |
| AP001258.4 | MDK       | 0.551747717 | 0           |
| AP001258.4 | KRT19     | 0.535042991 | 0           |
| AP001258.4 | MET       | 0.688475875 | 0           |
| AP001258.4 | TESC      | 0.288541971 | 8.72E-10    |
| AP001258.4 | CXCL17    | 0.690876138 | 1.50E-63    |
| AP001258.4 | NPC2      | 0.529810052 | 0           |
| AP001258.4 | COMP      | 0.481372671 | 0           |
| AP001258.4 | TUSC3     | 0.529948343 | 0           |
| AP001258.4 | TMPRSS4   | 0.602971488 | 0           |
| AP001258.4 | LGALS3    | 0.573330932 | 0           |
| AP001258.4 | CRLF1     | 0.426955721 | 0           |

|            |          |             |          |
|------------|----------|-------------|----------|
| AP001258.4 | CTXN1    | 0.565433724 | 0        |
| AP001258.4 | PCSK1N   | 0.20722107  | 1.26E-05 |
| AP001258.4 | NMU      | 0.452530155 | 1.51E-23 |
| AP001258.4 | GALE     | 0.490737893 | 0        |
| AP001258.4 | PCSK2    | 0.236778226 | 5.63E-07 |
| AP001258.4 | GJB3     | 0.626833741 | 0        |
| AP001258.4 | SLPI     | 0.416887413 | 0        |
| AP001258.4 | AGR2     | 0.23518114  | 6.73E-07 |
| AP001258.4 | MRC2     | 0.490528116 | 0        |
| AP001258.4 | GOLT1A   | 0.469589268 | 0        |
| AP001258.4 | SLC27A6  | 0.662328862 | 9.16E-57 |
| AP001258.4 | KCNN4    | 0.559109348 | 0        |
| AP001258.4 | ETV4     | 0.410778644 | 2.67E-19 |
| AP001258.4 | SYT12    | 0.652855891 | 0        |
| AP001258.4 | PVRL4    | 0.715896255 | 0        |
| AP001258.4 | PLCD3    | 0.631987677 | 0        |
| AP001258.4 | PLAU     | 0.510823875 | 0        |
| AP001258.4 | LRRK2    | 0.255355345 | 6.45E-08 |
| AP001258.4 | SFN      | 0.517725812 | 0        |
| AP001258.4 | LPAR5    | 0.608805675 | 0        |
| AP001258.4 | NGEF     | 0.614285269 | 0        |
| AP001258.4 | DTX4     | 0.825664578 | 0        |
| AP001258.4 | CST6     | 0.598239659 | 0        |
| AP001258.4 | QPCT     | 0.564098611 | 0        |
| AP001258.4 | TIMP1    | 0.567119033 | 0        |
| AP001258.4 | CAMK2N1  | 0.643906393 | 0        |
| AP001258.4 | KLHDC8A  | 0.273533191 | 6.55E-09 |
| AP001258.4 | PDLIM4   | 0.712819665 | 0        |
| AP001258.4 | SCEL     | 0.51370558  | 0        |
| AP001258.4 | LCN2     | 0.609822647 | 0        |
| AP001258.4 | PROS1    | 0.711373069 | 0        |
| AP001258.4 | GABRB2   | 0.746874619 | 0        |
| AP001258.4 | TMPRSS6  | 0.705875461 | 0        |
| AP001258.4 | KLK7     | 0.633240789 | 1.40E-50 |
| AP001258.4 | PDZK1IP1 | 0.434909664 | 0        |
| AP001258.4 | CDH3     | 0.533796242 | 0        |
| AP001258.4 | LRP4     | 0.370397456 | 9.90E-16 |
| AP001258.4 | IGSF1    | 0.341625085 | 2.51E-13 |
| AP001258.4 | B3GNT3   | 0.574177132 | 0        |
| AP001258.4 | CLDN1    | 0.535053629 | 0        |
| AP001258.4 | GDF15    | 0.549815895 | 0        |
| AP001258.4 | ARHGAP36 | 0.387849329 | 3.29E-17 |
| AP001258.4 | LAMB3    | 0.488316024 | 0        |
| AP001258.4 | KLK10    | 0.742248743 | 0        |
| AP001258.4 | DPP4     | 0.537225864 | 0        |
| AP001258.4 | METTL7B  | 0.498075837 | 0        |
| AP001258.4 | LIPH     | 0.599953477 | 0        |
| AP001258.4 | CLDN16   | 0.54992511  | 0        |
| AP001258.4 | CHI3L1   | 0.592647305 | 0        |
| AP001258.4 | SLC22A31 | 0.492273526 | 3.57E-28 |
| AP001258.4 | TACSTD2  | 0.683435692 | 0        |



|               |           |              |             |
|---------------|-----------|--------------|-------------|
| AP001258.4    | SFTPB     | 0.660870965  | 0           |
| AP001258.4    | RXRG      | 0.485516585  | 0           |
| AP001258.4    | DCSTAMP   | 0.765075754  | 1.45E-85    |
| AP001258.4    | CITED1    | 0.568926889  | 0           |
| AP001258.4    | SERPINA1  | 0.706424229  | 0           |
| AP001258.4    | PRR15     | 0.4784287    | 0           |
| AP001258.4    | SLC34A2   | 0.717676452  | 0           |
| AP001258.4    | FN1       | 0.679136467  | 0           |
| AP001258.4    | ZCCHC12   | 0.386298675  | 0           |
| RP11-366L20.2 | TFF3      | -0.380326623 | 5.02E-17    |
| RP11-366L20.2 | CCL21     | -0.367875793 | 1.63E-15    |
| RP11-366L20.2 | TPO       | -0.415067358 | 0           |
| RP11-366L20.2 | MT1G      | -0.351523047 | 4.37E-14    |
| RP11-366L20.2 | DIO1      | -0.442776235 | 0           |
| RP11-366L20.2 | DPT       | -0.437591817 | 5.83E-22    |
| RP11-366L20.2 | CDH16     | -0.420264696 | 0           |
| RP11-366L20.2 | CRABP1    | -0.234338368 | 6.86E-07    |
| RP11-366L20.2 | SLC26A7   | -0.177788731 | 0.00018498  |
| RP11-366L20.2 | MT1H      | -0.346417669 | 8.01E-14    |
| RP11-366L20.2 | SLC26A4   | -0.284594785 | 1.50E-09    |
| RP11-366L20.2 | SLC5A8    | -0.372254646 | 7.08E-16    |
| RP11-366L20.2 | PKHD1L1   | -0.347636407 | 6.47E-14    |
| RP11-366L20.2 | TFCP2L1   | -0.372726705 | 5.66E-16    |
| RP11-366L20.2 | WSCD2     | -0.360905161 | 5.96E-15    |
| RP11-366L20.2 | IPCEF1    | -0.40663046  | 0           |
| RP11-366L20.2 | SLC5A5    | -0.454605258 | 8.94E-24    |
| RP11-366L20.2 | MT1F      | -0.401227459 | 0           |
| RP11-366L20.2 | FOSB      | -0.226664955 | 1.71E-06    |
| RP11-366L20.2 | SEMA3D    | -0.410102364 | 3.09E-19    |
| RP11-366L20.2 | BMP8A     | -0.356199134 | 1.84E-14    |
| RP11-366L20.2 | MATN2     | -0.207841749 | 1.18E-05    |
| RP11-366L20.2 | PLA2R1    | -0.390708533 | 0           |
| RP11-366L20.2 | COL23A1   | -0.278406999 | 3.45E-09    |
| RP11-366L20.2 | HGD       | -0.44253185  | 0           |
| RP11-366L20.2 | TCEAL2    | -0.382062709 | 1.71E-17    |
| RP11-366L20.2 | CHRD1     | -0.413460146 | 1.48E-19    |
| RP11-366L20.2 | TNFRSF11B | -0.436184496 | 0           |
| RP11-366L20.2 | FAM167A   | -0.35636565  | 1.78E-14    |
| RP11-366L20.2 | KIT       | -0.306004533 | 7.18E-11    |
| RP11-366L20.2 | SLC4A4    | -0.314955165 | 1.87E-11    |
| RP11-366L20.2 | SMOC2     | -0.385675868 | 0           |
| RP11-366L20.2 | FHL1      | -0.374427049 | 3.65E-16    |
| RP11-366L20.2 | OTOS      | -0.458764684 | 0           |
| RP11-366L20.2 | IGFBPL1   | -0.316764485 | 1.09E-11    |
| RP11-366L20.2 | HBB       | -0.273410786 | 6.65E-09    |
| RP11-366L20.2 | BEX1      | -0.167576457 | 0.000429093 |
| RP11-366L20.2 | FABP4     | -0.283712457 | 1.43E-09    |
| RP11-366L20.2 | LMOD1     | -0.344439559 | 1.54E-13    |
| RP11-366L20.2 | SOD3      | -0.466183333 | 0           |
| RP11-366L20.2 | TMEM171   | -0.417795738 | 0           |
| RP11-366L20.2 | PI16      | -0.337115515 | 5.39E-13    |

|               |            |              |             |
|---------------|------------|--------------|-------------|
| RP11-366L20.2 | ZMAT4      | -0.43696813  | 6.77E-22    |
| RP11-366L20.2 | MFAP4      | -0.268600663 | 1.24E-08    |
| RP11-366L20.2 | CWH43      | -0.381849612 | 1.09E-16    |
| RP11-366L20.2 | SPX        | -0.181479191 | 0.000134926 |
| RP11-366L20.2 | APOD       | -0.327520375 | 2.60E-12    |
| RP11-366L20.2 | DPP6       | -0.343935612 | 1.68E-13    |
| RP11-366L20.2 | MMRN1      | -0.293256495 | 4.52E-10    |
| RP11-366L20.2 | WDR72      | -0.179067109 | 0.000165943 |
| RP11-366L20.2 | MPPED2     | -0.286968855 | 1.08E-09    |
| RP11-366L20.2 | PAPSS2     | -0.466961877 | 0           |
| RP11-366L20.2 | DCN        | -0.399112951 | 0           |
| RP11-366L20.2 | SORBS2     | -0.351062502 | 4.75E-14    |
| RP11-366L20.2 | EGR2       | -0.075136802 | 0.115919271 |
| RP11-366L20.2 | EDN3       | -0.089133664 | 0.062048568 |
| RP11-366L20.2 | DIO2       | -0.174215002 | 0.00024963  |
| RP11-366L20.2 | ITPR1      | -0.390419044 | 0           |
| RP11-366L20.2 | CFD        | -0.40198189  | 0           |
| RP11-366L20.2 | CPXM1      | -0.412817396 | 0           |
| RP11-366L20.2 | ELMO1      | -0.423572055 | 0           |
| RP11-366L20.2 | GPC3       | -0.378934079 | 1.94E-16    |
| RP11-366L20.2 | MYOC       | -0.048390419 | 0.311732279 |
| RP11-366L20.2 | DEPTOR     | -0.341928191 | 2.38E-13    |
| RP11-366L20.2 | DGKI       | -0.389895523 | 0           |
| RP11-366L20.2 | CARTPT     | -0.332922045 | 8.02E-13    |
| RP11-366L20.2 | IYD        | -0.142448591 | 0.002799476 |
| RP11-366L20.2 | LYVE1      | -0.315295574 | 1.77E-11    |
| RP11-366L20.2 | CLCNKB     | -0.250911587 | 1.10E-07    |
| RP11-366L20.2 | NCAM1      | -0.495289447 | 0           |
| RP11-366L20.2 | HBA2       | -0.279121291 | 3.13E-09    |
| RP11-366L20.2 | GLT8D2     | -0.411561712 | 0           |
| RP11-366L20.2 | OGDHL      | -0.3062753   | 6.90E-11    |
| RP11-366L20.2 | LIFR       | -0.272108579 | 7.88E-09    |
| RP11-366L20.2 | CSGALNACT1 | -0.335997838 | 6.49E-13    |
| RP11-366L20.2 | RAP1GAP    | -0.263410984 | 2.39E-08    |
| RP11-366L20.2 | COL9A3     | -0.289622486 | 7.51E-10    |
| RP11-366L20.2 | FBLN1      | -0.440514926 | 0           |
| RP11-366L20.2 | EFEMP1     | -0.426984089 | 0           |
| RP11-366L20.2 | AOX1       | -0.500493256 | 3.29E-29    |
| RP11-366L20.2 | GRIN2C     | -0.376464397 | 2.05E-16    |
| RP11-366L20.2 | C11orf74   | -0.33223107  | 1.21E-12    |
| RP11-366L20.2 | PPARGC1A   | -0.381179347 | 3.20E-17    |
| RP11-366L20.2 | ANGPTL1    | -0.233367327 | 8.24E-07    |
| RP11-366L20.2 | SCARA5     | -0.389741111 | 2.24E-17    |
| RP11-366L20.2 | LTF        | -0.394208932 | 0           |
| RP11-366L20.2 | CA4        | -0.159943407 | 0.000770142 |
| RP11-366L20.2 | TG         | -0.150070493 | 0.001631437 |
| RP11-366L20.2 | FCGBP      | -0.306286222 | 6.89E-11    |
| RP11-366L20.2 | PBX4       | -0.284562305 | 1.51E-09    |
| RP11-366L20.2 | CYR61      | -0.226922248 | 1.66E-06    |
| RP11-366L20.2 | FOS        | -0.241073622 | 3.46E-07    |
| RP11-366L20.2 | KHDRBS2    | -0.248890975 | 1.40E-07    |

|               |          |              |             |
|---------------|----------|--------------|-------------|
| RP11-366L20.2 | MUM1L1   | -0.41032858  | 0           |
| RP11-366L20.2 | RGS16    | -0.327859933 | 2.47E-12    |
| RP11-366L20.2 | MT1M     | -0.404228023 | 0           |
| RP11-366L20.2 | LRP2     | -0.284662442 | 1.48E-09    |
| RP11-366L20.2 | MAFB     | -0.457846288 | 0           |
| RP11-366L20.2 | KCNK2    | -0.376377877 | 2.11E-16    |
| RP11-366L20.2 | TBC1D4   | -0.294336727 | 3.88E-10    |
| RP11-366L20.2 | MIOX     | -0.343851869 | 1.25E-13    |
| RP11-366L20.2 | TPPP     | -0.281658615 | 2.23E-09    |
| RP11-366L20.2 | FMOD     | -0.490790941 | 0           |
| RP11-366L20.2 | CITED2   | -0.336957508 | 5.53E-13    |
| RP11-366L20.2 | RGS8     | -0.355778724 | 1.52E-14    |
| RP11-366L20.2 | ABI3BP   | -0.178540468 | 0.000173551 |
| RP11-366L20.2 | ADH1B    | -0.356003112 | 1.46E-14    |
| RP11-366L20.2 | OGN      | -0.379139141 | 1.86E-16    |
| RP11-366L20.2 | NR4A1    | -0.224157133 | 2.23E-06    |
| RP11-366L20.2 | FOXJ1    | -0.254715195 | 6.26E-08    |
| RP11-366L20.2 | ALDH1A1  | -0.27264912  | 7.35E-09    |
| RP11-366L20.2 | OCA2     | -0.339308902 | 2.73E-13    |
| RP11-366L20.2 | TMEM139  | -0.325193395 | 3.78E-12    |
| RP11-366L20.2 | ARHGAP24 | -0.434558333 | 0           |
| RP11-366L20.2 | SLC25A15 | -0.310882738 | 3.47E-11    |
| RP11-366L20.2 | DES      | -0.287764075 | 8.12E-10    |
| RP11-366L20.2 | GDF10    | -0.431264001 | 2.60E-21    |
| RP11-366L20.2 | KIAA1324 | -0.395714533 | 0           |
| RP11-366L20.2 | JUN      | -0.224403362 | 2.17E-06    |
| RP11-366L20.2 | C7       | -0.288279289 | 9.04E-10    |
| RP11-366L20.2 | LGI3     | -0.324792847 | 4.03E-12    |
| RP11-366L20.2 | CDON     | -0.313484172 | 2.34E-11    |
| RP11-366L20.2 | BCL2     | -0.257149442 | 5.18E-08    |
| RP11-366L20.2 | HLF      | -0.252989218 | 8.58E-08    |
| RP11-366L20.2 | EGR1     | -0.110325318 | 0.020816807 |
| RP11-366L20.2 | IP6K3    | -0.28543361  | 1.34E-09    |
| RP11-366L20.2 | SCUBE3   | -0.310651259 | 3.59E-11    |
| RP11-366L20.2 | PKNOX2   | -0.25275164  | 8.83E-08    |
| RP11-366L20.2 | SMAD9    | -0.273649214 | 6.45E-09    |
| RP11-366L20.2 | IQGAP2   | -0.334728396 | 8.02E-13    |
| RP11-366L20.2 | GNA14    | -0.354086753 | 2.73E-14    |
| RP11-366L20.2 | LAYN     | -0.355117767 | 2.25E-14    |
| RP11-366L20.2 | AVPR1A   | -0.313785434 | 2.23E-11    |
| RP11-366L20.2 | PDLIM3   | -0.501134413 | 0           |
| RP11-366L20.2 | GPM6A    | -0.208597883 | 1.10E-05    |
| RP11-366L20.2 | SDPR     | -0.057118806 | 0.232247116 |
| RP11-366L20.2 | CRYAB    | -0.306089352 | 7.09E-11    |
| RP11-366L20.2 | FOXA2    | -0.424714971 | 1.18E-20    |
| RP11-366L20.2 | C8orf88  | -0.223169805 | 2.48E-06    |
| RP11-366L20.2 | ISM1     | -0.415034452 | 0           |
| RP11-366L20.2 | BMP2     | -0.304631408 | 8.79E-11    |
| RP11-366L20.2 | ID4      | -0.297353035 | 2.53E-10    |
| RP11-366L20.2 | NUPR1    | -0.338160571 | 4.52E-13    |
| RP11-366L20.2 | SERTM1   | -0.399547216 | 2.96E-18    |

|               |          |              |             |
|---------------|----------|--------------|-------------|
| RP11-366L20.2 | IRS1     | -0.233462074 | 8.15E-07    |
| RP11-366L20.2 | FIBIN    | -0.468097425 | 0           |
| RP11-366L20.2 | PODN     | -0.395428873 | 0           |
| RP11-366L20.2 | TDRD9    | -0.339793116 | 3.43E-13    |
| RP11-366L20.2 | EPHA3    | -0.354196393 | 2.67E-14    |
| RP11-366L20.2 | AIF1L    | -0.213710828 | 6.59E-06    |
| RP11-366L20.2 | EBF4     | -0.327779086 | 2.50E-12    |
| RP11-366L20.2 | ADM2     | -0.431923567 | 0           |
| RP11-366L20.2 | GSTM3    | -0.331506424 | 1.36E-12    |
| RP11-366L20.2 | HSD17B6  | -0.118472159 | 0.013033448 |
| RP11-366L20.2 | AGR3     | -0.247459821 | 1.50E-07    |
| RP11-366L20.2 | EPHB1    | -0.238508781 | 4.64E-07    |
| RP11-366L20.2 | TMOD1    | -0.466138229 | 0           |
| RP11-366L20.2 | WASF3    | -0.228224596 | 1.44E-06    |
| RP11-366L20.2 | SELV     | -0.373442981 | 5.63E-16    |
| RP11-366L20.2 | ENPP1    | -0.140051544 | 0.003300619 |
| RP11-366L20.2 | SYNE1    | -0.345573985 | 9.28E-14    |
| RP11-366L20.2 | PLCH1    | -0.439213002 | 0           |
| RP11-366L20.2 | CCDC146  | -0.231960161 | 9.62E-07    |
| RP11-366L20.2 | SLC16A2  | -0.354597367 | 2.48E-14    |
| RP11-366L20.2 | IER2     | -0.237903988 | 4.96E-07    |
| RP11-366L20.2 | KCNAB1   | -0.187084878 | 8.26E-05    |
| RP11-366L20.2 | SYNDIG1  | -0.468742642 | 0           |
| RP11-366L20.2 | C16orf89 | -0.189350726 | 6.74E-05    |
| RP11-366L20.2 | CTGF     | -0.193622152 | 4.57E-05    |
| RP11-366L20.2 | NR4A3    | -0.295826159 | 3.14E-10    |
| RP11-366L20.2 | KIAA1456 | -0.108739437 | 0.022731648 |
| RP11-366L20.2 | AQP4     | -0.282051788 | 2.12E-09    |
| RP11-366L20.2 | RNF150   | -0.41242011  | 0           |
| RP11-366L20.2 | C1S      | -0.39796563  | 0           |
| RP11-366L20.2 | PFKFB2   | -0.229935719 | 1.20E-06    |
| RP11-366L20.2 | PROX1    | -0.278001628 | 3.64E-09    |
| RP11-366L20.2 | TCF7L1   | -0.363643314 | 4.28E-15    |
| RP11-366L20.2 | HSPB6    | -0.294165671 | 3.97E-10    |
| RP11-366L20.2 | FHDC1    | -0.096753064 | 0.042778788 |
| RP11-366L20.2 | PRR15L   | -0.312535991 | 2.70E-11    |
| RP11-366L20.2 | SLC1A1   | -0.357879762 | 1.33E-14    |
| RP11-366L20.2 | BTBD11   | -0.233111736 | 8.47E-07    |
| RP11-366L20.2 | TRIM58   | -0.226851755 | 1.67E-06    |
| RP11-366L20.2 | LRIG1    | -0.312988593 | 2.52E-11    |
| RP11-366L20.2 | ROR2     | -0.488496725 | 0           |
| RP11-366L20.2 | GPR125   | -0.292203355 | 5.24E-10    |
| RP11-366L20.2 | FLRT1    | -0.304128879 | 9.46E-11    |
| RP11-366L20.2 | PGF      | -0.356054743 | 1.89E-14    |
| RP11-366L20.2 | DUSP1    | -0.253601103 | 7.97E-08    |
| RP11-366L20.2 | PLA2G7   | -0.365402378 | 2.97E-15    |
| RP11-366L20.2 | PLSCR4   | -0.212562798 | 7.40E-06    |
| RP11-366L20.2 | FAM46B   | -0.399097774 | 0           |
| RP11-366L20.2 | GLDC     | -0.384915905 | 0           |
| RP11-366L20.2 | ZBTB16   | -0.229806789 | 1.22E-06    |
| RP11-366L20.2 | OMD      | -0.398625874 | 3.59E-18    |

|               |          |              |             |
|---------------|----------|--------------|-------------|
| RP11-366L20.2 | HSD11B2  | -0.190155085 | 6.27E-05    |
| RP11-366L20.2 | FGL2     | -0.357629136 | 1.40E-14    |
| RP11-366L20.2 | CLCNKA   | -0.317387045 | 9.91E-12    |
| RP11-366L20.2 | GATM     | -0.044014757 | 0.357416883 |
| RP11-366L20.2 | TNS3     | -0.364036061 | 3.94E-15    |
| RP11-366L20.2 | TOB1     | -0.407955219 | 0           |
| RP11-366L20.2 | MARC2    | -0.236492141 | 5.82E-07    |
| RP11-366L20.2 | LRRC2    | -0.225285305 | 1.98E-06    |
| RP11-366L20.2 | SORD     | -0.104442481 | 0.028704853 |
| RP11-366L20.2 | RIMS4    | -0.227637674 | 1.54E-06    |
| RP11-366L20.2 | SLC29A4  | -0.383161096 | 3.18E-18    |
| RP11-366L20.2 | SLC39A14 | -0.287719599 | 9.77E-10    |
| RP11-366L20.2 | FAXDC2   | -0.136828011 | 0.00410298  |
| RP11-366L20.2 | HSPB8    | -0.458513916 | 0           |
| RP11-366L20.2 | CCL19    | -0.266447626 | 1.43E-08    |
| RP11-366L20.2 | KCNIP3   | -0.31566662  | 1.68E-11    |
| RP11-366L20.2 | CGNL1    | -0.237262884 | 5.34E-07    |
| RP11-366L20.2 | ATF3     | -0.184611948 | 0.000102727 |
| RP11-366L20.2 | SGCD     | -0.383817518 | 0           |
| RP11-366L20.2 | STARD13  | -0.268104517 | 1.32E-08    |
| RP11-366L20.2 | LDHD     | -0.204571127 | 1.63E-05    |
| RP11-366L20.2 | RCAN1    | -0.312899945 | 2.56E-11    |
| RP11-366L20.2 | ID3      | -0.459375009 | 0           |
| RP11-366L20.2 | SYTL3    | -0.204052712 | 1.71E-05    |
| RP11-366L20.2 | MT1E     | -0.351450852 | 4.43E-14    |
| RP11-366L20.2 | CAMK1D   | -0.247318569 | 1.68E-07    |
| RP11-366L20.2 | PRKCQ    | -0.128726842 | 0.00695312  |
| RP11-366L20.2 | NUAK2    | -0.370217465 | 1.03E-15    |
| RP11-366L20.2 | LIPG     | -0.004210577 | 0.929872738 |
| RP11-366L20.2 | SLC25A25 | -0.332356028 | 1.19E-12    |
| RP11-366L20.2 | PRKX     | -0.237219482 | 5.36E-07    |
| RP11-366L20.2 | SRPX     | -0.393485988 | 0           |
| RP11-366L20.2 | FAM189A1 | -0.223336321 | 2.44E-06    |
| RP11-366L20.2 | PLEKHH1  | -0.002249253 | 0.962504724 |
| RP11-366L20.2 | WNT11    | -0.406864208 | 0           |
| RP11-366L20.2 | SNAI1    | -0.463796214 | 0           |
| RP11-366L20.2 | FDCSP    | -0.225687607 | 1.78E-06    |
| RP11-366L20.2 | MT1X     | -0.242272146 | 3.02E-07    |
| RP11-366L20.2 | ACACB    | -0.247382821 | 1.67E-07    |
| RP11-366L20.2 | ARC      | -0.017444691 | 0.715384153 |
| RP11-366L20.2 | KLK4     | -0.376126781 | 3.36E-16    |
| RP11-366L20.2 | ZFPM2    | -0.355343856 | 2.16E-14    |
| RP11-366L20.2 | AKAP12   | -0.14888899  | 0.001776775 |
| RP11-366L20.2 | GJB6     | -0.307344796 | 4.67E-11    |
| RP11-366L20.2 | ERO1LB   | -0.273343697 | 6.71E-09    |
| RP11-366L20.2 | DNALI1   | -0.305526116 | 7.70E-11    |
| RP11-366L20.2 | HKDC1    | -0.489769004 | 0           |
| RP11-366L20.2 | ZFP36L2  | -0.234431815 | 7.32E-07    |
| RP11-366L20.2 | CAPSL    | -0.328821713 | 1.58E-12    |
| RP11-366L20.2 | CYP7B1   | -0.358969355 | 1.08E-14    |
| RP11-366L20.2 | CPQ      | -0.281445292 | 2.30E-09    |

|               |          |              |             |
|---------------|----------|--------------|-------------|
| RP11-366L20.2 | RPS6KA6  | -0.189071385 | 6.71E-05    |
| RP11-366L20.2 | TLE1     | -0.47958368  | 0           |
| RP11-366L20.2 | TP53INP2 | -0.302301307 | 1.24E-10    |
| RP11-366L20.2 | KATNAL2  | -0.264776876 | 2.01E-08    |
| RP11-366L20.2 | SGPP2    | -0.461054219 | 0           |
| RP11-366L20.2 | CTH      | -0.341268932 | 2.66E-13    |
| RP11-366L20.2 | KIF12    | -0.177700934 | 0.00018636  |
| RP11-366L20.2 | TMEM220  | -0.174240675 | 0.000249098 |
| RP11-366L20.2 | CENPJ    | -0.286662062 | 1.13E-09    |
| RP11-366L20.2 | FAM155B  | -0.181447703 | 0.000135293 |
| RP11-366L20.2 | WFS1     | -0.492221368 | 0           |
| RP11-366L20.2 | SELENBP1 | -0.22529878  | 1.98E-06    |
| RP11-366L20.2 | SNTA1    | -0.356934559 | 1.60E-14    |
| RP11-366L20.2 | FRAS1    | -0.223564963 | 2.38E-06    |
| RP11-366L20.2 | FBLN7    | -0.386795956 | 0           |
| RP11-366L20.2 | AGPAT9   | -0.103429196 | 0.030295455 |
| RP11-366L20.2 | GPR83    | -0.107770973 | 0.023974581 |
| RP11-366L20.2 | PRTG     | -0.086295555 | 0.07088124  |
| RP11-366L20.2 | EGR3     | -0.139444339 | 0.00343988  |
| RP11-366L20.2 | GRAMD2   | -0.358887089 | 1.10E-14    |
| RP11-366L20.2 | HYOU1    | -0.394886346 | 0           |
| RP11-366L20.2 | FBLN5    | -0.34405745  | 1.65E-13    |
| RP11-366L20.2 | ITM2A    | -0.214390512 | 6.15E-06    |
| RP11-366L20.2 | SRF      | -0.290520032 | 6.63E-10    |
| RP11-366L20.2 | FGFR2    | 0.005735043  | 0.904587259 |
| RP11-366L20.2 | MT1A     | -0.379064073 | 1.89E-16    |
| RP11-366L20.2 | MAMDC2   | -0.265550456 | 1.83E-08    |
| RP11-366L20.2 | FHL2     | -0.530910141 | 0           |
| RP11-366L20.2 | FTCDNL1  | -0.237921575 | 4.95E-07    |
| RP11-366L20.2 | PKIA     | -0.055714193 | 0.243946569 |
| RP11-366L20.2 | DNAJB4   | -0.064325976 | 0.178448859 |
| RP11-366L20.2 | SLC25A33 | -0.473378021 | 0           |
| RP11-366L20.2 | EYA2     | -0.347409487 | 9.14E-14    |
| RP11-366L20.2 | LPAR1    | -0.541862378 | 0           |
| RP11-366L20.2 | STX11    | -0.273541276 | 6.54E-09    |
| RP11-366L20.2 | ARHGEF28 | -0.274774692 | 5.57E-09    |
| RP11-366L20.2 | OR2W3    | -0.262874273 | 2.55E-08    |
| RP11-366L20.2 | ALDH1B1  | -0.405556484 | 8.25E-19    |
| RP11-366L20.2 | CXCL12   | -0.310907275 | 3.45E-11    |
| RP11-366L20.2 | OLFM2    | -0.33059356  | 1.58E-12    |
| RP11-366L20.2 | TUB      | -0.031214948 | 0.514046945 |
| RP11-366L20.2 | HTRA3    | -0.377947021 | 1.28E-16    |
| RP11-366L20.2 | CKB      | -0.477836955 | 0           |
| RP11-366L20.2 | RGS2     | -0.410661755 | 0           |
| RP11-366L20.2 | SHANK2   | -0.213152841 | 6.97E-06    |
| RP11-366L20.2 | CNTFR    | -0.26642211  | 1.44E-08    |
| RP11-366L20.2 | CYTH3    | -0.241957551 | 3.13E-07    |
| RP11-366L20.2 | PLAC9    | -0.287095232 | 1.06E-09    |
| RP11-366L20.2 | WWOX     | -0.213023202 | 7.06E-06    |
| RP11-366L20.2 | NPR3     | -0.310788416 | 3.52E-11    |
| RP11-366L20.2 | SDC2     | -0.141019582 | 0.003089164 |

|               |          |              |             |
|---------------|----------|--------------|-------------|
| RP11-366L20.2 | KLF15    | -0.068596408 | 0.151278875 |
| RP11-366L20.2 | TMEM164  | -0.448133565 | 0           |
| RP11-366L20.2 | LONRF3   | -0.057319221 | 0.230610731 |
| RP11-366L20.2 | GBP1     | -0.217498447 | 4.48E-06    |
| RP11-366L20.2 | ARHGAP6  | -0.206224381 | 1.39E-05    |
| RP11-366L20.2 | TMEM119  | -0.430476544 | 0           |
| RP11-366L20.2 | SH3RF1   | -0.218589033 | 4.00E-06    |
| RP11-366L20.2 | CRELD2   | -0.43617783  | 0           |
| RP11-366L20.2 | PCP4     | -0.230072592 | 1.18E-06    |
| RP11-366L20.2 | GCSH     | -0.204794804 | 1.59E-05    |
| RP11-366L20.2 | IMPA2    | -0.210682464 | 8.93E-06    |
| RP11-366L20.2 | C1R      | -0.403710743 | 0           |
| RP11-366L20.2 | SUCNR1   | -0.234263596 | 7.46E-07    |
| RP11-366L20.2 | SFRP1    | -0.298960192 | 2.01E-10    |
| RP11-366L20.2 | UGT8     | -0.30713923  | 6.07E-11    |
| RP11-366L20.2 | TLE4     | -0.347599832 | 8.84E-14    |
| RP11-366L20.2 | ANTXR1   | -0.430285773 | 0           |
| RP11-366L20.2 | GPX3     | -0.396385281 | 0           |
| RP11-366L20.2 | DPY19L2  | -0.185755297 | 9.29E-05    |
| RP11-366L20.2 | FAM46C   | -0.323815731 | 4.71E-12    |
| RP11-366L20.2 | IL33     | -0.29014084  | 5.81E-10    |
| RP11-366L20.2 | PEG3     | -0.188080149 | 7.56E-05    |
| RP11-366L20.2 | FAHD2A   | -0.271259258 | 8.80E-09    |
| RP11-366L20.2 | PTGDS    | -0.161447391 | 0.000695413 |
| RP11-366L20.2 | CHCHD10  | -0.385862809 | 0           |
| RP11-366L20.2 | CD36     | -0.192731982 | 4.96E-05    |
| RP11-366L20.2 | ANKRD37  | -0.337873493 | 4.74E-13    |
| RP11-366L20.2 | TSPAN33  | -0.412109487 | 0           |
| RP11-366L20.2 | PRDM16   | -0.191914291 | 5.35E-05    |
| RP11-366L20.2 | UST      | -0.116426726 | 0.014696942 |
| RP11-366L20.2 | NEXN     | -0.285606226 | 1.31E-09    |
| RP11-366L20.2 | NUPR1L   | -0.146729075 | 0.002054432 |
| RP11-366L20.2 | SLC24A3  | -0.453629612 | 0           |
| RP11-366L20.2 | MARC1    | -0.234601594 | 7.18E-07    |
| RP11-366L20.2 | MYH11    | -0.154960044 | 0.001138691 |
| RP11-366L20.2 | APOA1    | -0.383383936 | 8.06E-17    |
| RP11-366L20.2 | TMEM178B | -0.466011001 | 0           |
| RP11-366L20.2 | CAPN6    | -0.372569389 | 6.66E-16    |
| RP11-366L20.2 | PPM1L    | -0.382499426 | 1.10E-17    |
| RP11-366L20.2 | FZD8     | -0.381735491 | 2.22E-17    |
| RP11-366L20.2 | RCAN2    | -0.343428118 | 1.84E-13    |
| RP11-366L20.2 | COPZ2    | -0.446867527 | 0           |
| RP11-366L20.2 | GAS1     | -0.419512392 | 0           |
| RP11-366L20.2 | DACT1    | -0.325331402 | 3.70E-12    |
| RP11-366L20.2 | WBSCR17  | -0.265831719 | 1.76E-08    |
| RP11-366L20.2 | NCS1     | -0.348641342 | 7.34E-14    |
| RP11-366L20.2 | SPIRE2   | -0.279889481 | 2.83E-09    |
| RP11-366L20.2 | C15orf52 | -0.415420249 | 0           |
| RP11-366L20.2 | SPAG5    | -0.411659012 | 0           |
| RP11-366L20.2 | ARL4D    | -0.440598468 | 0           |
| RP11-366L20.2 | FAM189A2 | -0.010362621 | 0.828524602 |

|               |          |              |             |
|---------------|----------|--------------|-------------|
| RP11-366L20.2 | MAP1LC3A | -0.33674532  | 5.73E-13    |
| RP11-366L20.2 | KLF6     | -0.162618824 | 0.000634921 |
| RP11-366L20.2 | ADD3     | -0.213228866 | 6.92E-06    |
| RP11-366L20.2 | TSPAN7   | -0.138194186 | 0.00374353  |
| RP11-366L20.2 | KLF9     | -0.185420278 | 9.57E-05    |
| RP11-366L20.2 | KCNQ1    | -0.249201031 | 1.35E-07    |
| RP11-366L20.2 | MAN1A1   | -0.36521416  | 3.09E-15    |
| RP11-366L20.2 | MLF1     | -0.154320075 | 0.001194267 |
| RP11-366L20.2 | RARB     | -0.266496509 | 1.62E-08    |
| RP11-366L20.2 | CDC42EP2 | -0.313626719 | 2.29E-11    |
| RP11-366L20.2 | FAM3B    | -0.226137179 | 1.81E-06    |
| RP11-366L20.2 | GADD45B  | -0.330622211 | 1.58E-12    |
| RP11-366L20.2 | TMEM47   | -0.236587881 | 5.76E-07    |
| RP11-366L20.2 | SDF2L1   | -0.360224471 | 8.47E-15    |
| RP11-366L20.2 | CCDC85A  | -0.234654073 | 7.14E-07    |
| RP11-366L20.2 | CRYBG3   | -0.185347515 | 9.63E-05    |
| RP11-366L20.2 | FBLN2    | -0.316422612 | 1.49E-11    |
| RP11-366L20.2 | PEBP4    | -0.121886179 | 0.010624704 |
| RP11-366L20.2 | CDADC1   | -0.193866395 | 4.47E-05    |
| RP11-366L20.2 | FAM63A   | -0.217820559 | 4.33E-06    |
| RP11-366L20.2 | GLUL     | -0.295094137 | 3.48E-10    |
| RP11-366L20.2 | FREM2    | -0.162772859 | 0.00062734  |
| RP11-366L20.2 | ACKR3    | -0.225288    | 1.98E-06    |
| RP11-366L20.2 | DENND6A  | -0.272952226 | 7.06E-09    |
| RP11-366L20.2 | CLDN8    | -0.210550555 | 9.05E-06    |
| RP11-366L20.2 | UTS2R    | -0.127763026 | 0.007355776 |
| RP11-366L20.2 | SCNN1B   | -0.053721948 | 0.261238997 |
| RP11-366L20.2 | TTC30A   | -0.323958845 | 4.60E-12    |
| RP11-366L20.2 | CORO2B   | -0.310129015 | 3.88E-11    |
| RP11-366L20.2 | TC2N     | -0.472471966 | 0           |
| RP11-366L20.2 | ALDH2    | -0.438265956 | 0           |
| RP11-366L20.2 | GPR183   | -0.25185296  | 9.83E-08    |
| RP11-366L20.2 | C4orf47  | -0.25180275  | 9.89E-08    |
| RP11-366L20.2 | SLC25A42 | -0.162264231 | 0.000652696 |
| RP11-366L20.2 | LGMN     | -0.404379647 | 0           |
| RP11-366L20.2 | ACSF2    | -0.396973621 | 0           |
| RP11-366L20.2 | KIAA1467 | -0.281523444 | 2.27E-09    |
| RP11-366L20.2 | PRKG1    | -0.238850325 | 4.46E-07    |
| RP11-366L20.2 | GNAI1    | -0.318535985 | 1.08E-11    |
| RP11-366L20.2 | ABCC4    | -0.463567856 | 0           |
| RP11-366L20.2 | PRPS1    | -0.369956201 | 1.10E-15    |
| RP11-366L20.2 | TSPAN5   | -0.404847709 | 0           |
| RP11-366L20.2 | CR2      | -0.157254141 | 0.000946252 |
| RP11-366L20.2 | CCDC170  | -0.271429179 | 8.61E-09    |
| RP11-366L20.2 | RRAD     | -0.32912356  | 2.01E-12    |
| RP11-366L20.2 | SCGB2A1  | -0.331995195 | 1.26E-12    |
| RP11-366L20.2 | SESN3    | -0.386377253 | 0           |
| RP11-366L20.2 | SGK223   | -0.255719157 | 6.17E-08    |
| RP11-366L20.2 | NDRG2    | -0.292459654 | 5.05E-10    |
| RP11-366L20.2 | C3orf52  | -0.415784345 | 0           |
| RP11-366L20.2 | FLRT3    | 0.202370524  | 2.01E-05    |



|               |          |              |             |
|---------------|----------|--------------|-------------|
| RP11-366L20.2 | MST1R    | 0.255029261  | 6.71E-08    |
| RP11-366L20.2 | SDC1     | -0.031569116 | 0.509282145 |
| RP11-366L20.2 | ST8SIA4  | 0.183209604  | 0.000116126 |
| RP11-366L20.2 | UBTD1    | 0.353091624  | 3.28E-14    |
| RP11-366L20.2 | EPHA2    | 0.300779253  | 1.54E-10    |
| RP11-366L20.2 | TMEM130  | 0.420710349  | 0           |
| RP11-366L20.2 | SPINK2   | 0.23822922   | 4.79E-07    |
| RP11-366L20.2 | MMP16    | 0.2686591    | 1.23E-08    |
| RP11-366L20.2 | SIGLEC15 | 0.331610816  | 1.34E-12    |
| RP11-366L20.2 | RIN1     | 0.316213544  | 1.54E-11    |
| RP11-366L20.2 | IL1RN    | 0.12233566   | 0.010338967 |
| RP11-366L20.2 | FCER1G   | 0.025050849  | 0.600519356 |
| RP11-366L20.2 | CD276    | 0.197486221  | 3.20E-05    |
| RP11-366L20.2 | CTSB     | 0.421240678  | 0           |
| RP11-366L20.2 | FAM171A2 | 0.503681241  | 0           |
| RP11-366L20.2 | ASPHD1   | 0.341737562  | 2.46E-13    |
| RP11-366L20.2 | C15orf48 | 0.071200396  | 0.136327511 |
| RP11-366L20.2 | DYSF     | 0.306542238  | 6.63E-11    |
| RP11-366L20.2 | PDZRN4   | 0.257628568  | 4.89E-08    |
| RP11-366L20.2 | EFHD2    | 0.115208203  | 0.015774286 |
| RP11-366L20.2 | ASF1B    | 0.221409038  | 2.98E-06    |
| RP11-366L20.2 | AQP1     | 0.322370978  | 5.91E-12    |
| RP11-366L20.2 | ARRDC2   | 0.421588746  | 0           |
| RP11-366L20.2 | PRSS1    | 0.390236195  | 2.03E-17    |
| RP11-366L20.2 | MAPK13   | 0.304551837  | 8.89E-11    |
| RP11-366L20.2 | CST5     | 0.209034385  | 1.00E-05    |
| RP11-366L20.2 | AHR      | 0.259817683  | 3.74E-08    |
| RP11-366L20.2 | BAX      | 0.104454253  | 0.028686803 |
| RP11-366L20.2 | C1orf115 | 0.646792779  | 0           |
| RP11-366L20.2 | PLK3     | 0.192812971  | 4.93E-05    |
| RP11-366L20.2 | JAG2     | 0.374288332  | 3.79E-16    |
| RP11-366L20.2 | RAD23B   | 0.590597333  | 0           |
| RP11-366L20.2 | CA12     | 0.113888266  | 0.01701888  |
| RP11-366L20.2 | ADTRP    | 0.542513411  | 0           |
| RP11-366L20.2 | UCP2     | 0.390896751  | 0           |
| RP11-366L20.2 | IGFBP2   | 0.234411532  | 7.34E-07    |
| RP11-366L20.2 | LOXL2    | 0.187741726  | 7.79E-05    |
| RP11-366L20.2 | GPX1     | 0.113374249  | 0.017526327 |
| RP11-366L20.2 | P3H3     | 0.295303773  | 3.38E-10    |
| RP11-366L20.2 | C2orf81  | 0.476020447  | 0           |
| RP11-366L20.2 | CDT1     | 0.319361761  | 9.47E-12    |
| RP11-366L20.2 | SNX25    | 0.397575011  | 0           |
| RP11-366L20.2 | MTHFD1L  | 0.283420374  | 1.76E-09    |
| RP11-366L20.2 | CDC42BPG | 0.375143907  | 4.06E-16    |
| RP11-366L20.2 | MSN      | 0.487048852  | 0           |
| RP11-366L20.2 | SIGLEC6  | 0.356632745  | 1.30E-14    |
| RP11-366L20.2 | F2R      | 0.124544206  | 0.00903178  |
| RP11-366L20.2 | TMEM184A | 0.35232698   | 3.77E-14    |
| RP11-366L20.2 | CKS2     | 0.143408545  | 0.002619008 |
| RP11-366L20.2 | TAX1BP3  | 0.177819368  | 0.000184501 |
| RP11-366L20.2 | PMEPA1   | 0.228305869  | 1.43E-06    |

|               |          |             |             |
|---------------|----------|-------------|-------------|
| RP11-366L20.2 | CXCL16   | 0.152668382 | 0.001349453 |
| RP11-366L20.2 | FAXC     | 0.298058959 | 2.28E-10    |
| RP11-366L20.2 | VTCN1    | 0.203462974 | 1.74E-05    |
| RP11-366L20.2 | SH2D4A   | 0.388181421 | 0           |
| RP11-366L20.2 | RNF24    | 0.462007648 | 0           |
| RP11-366L20.2 | LY6G6C   | 0.398106474 | 4.00E-18    |
| RP11-366L20.2 | NID1     | 0.19098852  | 5.82E-05    |
| RP11-366L20.2 | STAC     | 0.206668898 | 1.33E-05    |
| RP11-366L20.2 | RAB34    | 0.416704868 | 0           |
| RP11-366L20.2 | HES4     | 0.235660266 | 6.38E-07    |
| RP11-366L20.2 | EPHA10   | 0.419604586 | 0           |
| RP11-366L20.2 | ENTPD2   | 0.500386648 | 0           |
| RP11-366L20.2 | DDB2     | 0.336035    | 6.45E-13    |
| RP11-366L20.2 | NKAIN4   | 0.182450634 | 0.000124046 |
| RP11-366L20.2 | TRIM29   | 0.243291387 | 2.69E-07    |
| RP11-366L20.2 | ADCY8    | 0.324059505 | 3.42E-12    |
| RP11-366L20.2 | SFTA2    | 0.189416681 | 6.70E-05    |
| RP11-366L20.2 | NRIP1    | 0.393581161 | 0           |
| RP11-366L20.2 | VWA1     | 0.204759629 | 1.60E-05    |
| RP11-366L20.2 | APLNR    | 0.246032815 | 1.95E-07    |
| RP11-366L20.2 | REN      | 0.47831642  | 1.76E-26    |
| RP11-366L20.2 | EDIL3    | 0.246554209 | 1.84E-07    |
| RP11-366L20.2 | AGRN     | 0.377019548 | 1.73E-16    |
| RP11-366L20.2 | TREM1    | 0.050538272 | 0.290592987 |
| RP11-366L20.2 | SRL      | 0.237884698 | 4.97E-07    |
| RP11-366L20.2 | RASGRF1  | 0.441529487 | 0           |
| RP11-366L20.2 | RMI2     | 0.341396018 | 2.61E-13    |
| RP11-366L20.2 | SAMD1    | 0.33522128  | 7.39E-13    |
| RP11-366L20.2 | MGAT4B   | 0.408291231 | 0           |
| RP11-366L20.2 | NXN      | 0.204962881 | 1.57E-05    |
| RP11-366L20.2 | SH3BGRL3 | 0.119727276 | 0.012096996 |
| RP11-366L20.2 | CA11     | 0.499124723 | 0           |
| RP11-366L20.2 | PLD3     | 0.369900317 | 1.11E-15    |
| RP11-366L20.2 | LURAP1L  | 0.273972603 | 6.18E-09    |
| RP11-366L20.2 | CARNS1   | 0.516023341 | 0           |
| RP11-366L20.2 | PDLIM7   | 0.221892845 | 2.83E-06    |
| RP11-366L20.2 | BCL2L1   | 0.137038214 | 0.004045715 |
| RP11-366L20.2 | GGT6     | 0.456004817 | 0           |
| RP11-366L20.2 | DPYSL3   | 0.096065438 | 0.044281696 |
| RP11-366L20.2 | FYN      | 0.400332466 | 0           |
| RP11-366L20.2 | TK1      | 0.096848663 | 0.042573289 |
| RP11-366L20.2 | AK1      | 0.231799034 | 9.79E-07    |
| RP11-366L20.2 | HIGD1B   | 0.40240882  | 0           |
| RP11-366L20.2 | TMEM59L  | 0.090658039 | 0.057718747 |
| RP11-366L20.2 | MEGF9    | 0.446625978 | 0           |
| RP11-366L20.2 | ZFP36L1  | 0.291610192 | 5.69E-10    |
| RP11-366L20.2 | ADRA1B   | 0.349318614 | 6.50E-14    |
| RP11-366L20.2 | EPHA4    | 0.224883906 | 2.07E-06    |
| RP11-366L20.2 | TCERG1L  | 0.422106452 | 0           |
| RP11-366L20.2 | NGFR     | 0.404401774 | 0           |
| RP11-366L20.2 | EBI3     | 0.149183727 | 0.001739448 |

|               |          |              |             |
|---------------|----------|--------------|-------------|
| RP11-366L20.2 | S100A10  | -0.105377613 | 0.027301109 |
| RP11-366L20.2 | S100B    | 0.052407685  | 0.273099038 |
| RP11-366L20.2 | CD44     | 0.446493644  | 0           |
| RP11-366L20.2 | BHLHE41  | 0.565406349  | 0           |
| RP11-366L20.2 | FBX02    | 0.302684551  | 1.17E-10    |
| RP11-366L20.2 | SLC30A2  | 0.112375148  | 0.018550616 |
| RP11-366L20.2 | FRMD5    | 0.201058814  | 2.28E-05    |
| RP11-366L20.2 | SAMD11   | 0.336108188  | 6.38E-13    |
| RP11-366L20.2 | SIPA1L2  | 0.464108256  | 0           |
| RP11-366L20.2 | S100A16  | 0.14529895   | 0.002294277 |
| RP11-366L20.2 | PPL      | 0.305914325  | 7.28E-11    |
| RP11-366L20.2 | ARHGDIB  | 0.147001421  | 0.002033765 |
| RP11-366L20.2 | CDC42EP3 | 0.150210628  | 0.001614943 |
| RP11-366L20.2 | RUNX2    | 0.418888025  | 0           |
| RP11-366L20.2 | LAMC2    | 0.196179191  | 3.61E-05    |
| RP11-366L20.2 | BRINP1   | 0.390154234  | 0           |
| RP11-366L20.2 | GPRC5B   | 0.614267681  | 0           |
| RP11-366L20.2 | AQP5     | 0.184463019  | 0.000104078 |
| RP11-366L20.2 | PLAG1    | 0.671993124  | 0           |
| RP11-366L20.2 | PTPRU    | 0.244913153  | 2.23E-07    |
| RP11-366L20.2 | ANGPTL4  | 0.013635938  | 0.775631788 |
| RP11-366L20.2 | PALM3    | 0.484723715  | 0           |
| RP11-366L20.2 | ACP5     | 0.080963188  | 0.090201059 |
| RP11-366L20.2 | DLG4     | 0.596813203  | 0           |
| RP11-366L20.2 | ETNK2    | 0.546707109  | 0           |
| RP11-366L20.2 | CD109    | 0.340485282  | 3.05E-13    |
| RP11-366L20.2 | SNX22    | 0.354659492  | 2.45E-14    |
| RP11-366L20.2 | TMEM98   | 0.455810925  | 0           |
| RP11-366L20.2 | CTHRC1   | -0.010539066 | 0.82565126  |
| RP11-366L20.2 | S100A2   | 0.069774224  | 0.144368703 |
| RP11-366L20.2 | C11orf80 | 0.38260169   | 9.69E-18    |
| RP11-366L20.2 | SREBF1   | 0.213125892  | 6.99E-06    |
| RP11-366L20.2 | PRSS22   | 0.416648417  | 0           |
| RP11-366L20.2 | CMTM3    | 0.076266251  | 0.110529182 |
| RP11-366L20.2 | RDH5     | 0.638032634  | 0           |
| RP11-366L20.2 | MYH10    | 0.243539886  | 2.61E-07    |
| RP11-366L20.2 | EVPL     | 0.327684764  | 2.54E-12    |
| RP11-366L20.2 | SCD      | 0.200247506  | 2.46E-05    |
| RP11-366L20.2 | CD151    | 0.315716831  | 1.66E-11    |
| RP11-366L20.2 | S100A4   | 0.130954819  | 0.006030787 |
| RP11-366L20.2 | BNIP1    | 0.554590701  | 0           |
| RP11-366L20.2 | MAP3K6   | 0.323231078  | 5.16E-12    |
| RP11-366L20.2 | MANEAL   | 0.381065878  | 3.41E-17    |
| RP11-366L20.2 | CD207    | 0.219690128  | 3.37E-06    |
| RP11-366L20.2 | CD1A     | 0.19315364   | 4.62E-05    |
| RP11-366L20.2 | C3       | 0.087152534  | 0.068117811 |
| RP11-366L20.2 | NT5E     | 0.098066618  | 0.04002723  |
| RP11-366L20.2 | CACNG4   | 0.226702419  | 1.59E-06    |
| RP11-366L20.2 | FHOD1    | 0.500198714  | 0           |
| RP11-366L20.2 | LEMD1    | 0.230647742  | 1.11E-06    |
| RP11-366L20.2 | ATP11A   | 0.32172647   | 6.54E-12    |

|               |          |             |             |
|---------------|----------|-------------|-------------|
| RP11-366L20.2 | PPAP2C   | 0.282100438 | 2.10E-09    |
| RP11-366L20.2 | DRAM1    | 0.259024813 | 4.12E-08    |
| RP11-366L20.2 | CDA      | 0.264583694 | 2.06E-08    |
| RP11-366L20.2 | CCND2    | 0.44498393  | 0           |
| RP11-366L20.2 | LCN6     | 0.412603378 | 1.79E-19    |
| RP11-366L20.2 | CDH4     | 0.42285138  | 0           |
| RP11-366L20.2 | MMP11    | 0.163996346 | 0.000570044 |
| RP11-366L20.2 | B3GAT1   | 0.511320731 | 0           |
| RP11-366L20.2 | SPP1     | 0.17484788  | 0.000236823 |
| RP11-366L20.2 | HLA-DQB1 | 0.00545307  | 0.909257683 |
| RP11-366L20.2 | SDC3     | 0.277691714 | 3.79E-09    |
| RP11-366L20.2 | CX3CL1   | 0.10465396  | 0.028382087 |
| RP11-366L20.2 | SDK1     | 0.293018209 | 4.67E-10    |
| RP11-366L20.2 | DOCK9    | 0.525386861 | 0           |
| RP11-366L20.2 | CSF2     | 0.228850942 | 1.26E-06    |
| RP11-366L20.2 | GRHL3    | 0.270732333 | 9.42E-09    |
| RP11-366L20.2 | TMEM92   | 0.231781628 | 9.13E-07    |
| RP11-366L20.2 | BASP1    | 0.246848095 | 1.78E-07    |
| RP11-366L20.2 | HRH1     | 0.224542362 | 2.14E-06    |
| RP11-366L20.2 | ESM1     | 0.218703211 | 3.95E-06    |
| RP11-366L20.2 | B4GALNT3 | 0.33035655  | 1.65E-12    |
| RP11-366L20.2 | LMO3     | 0.430206486 | 0           |
| RP11-366L20.2 | C9orf16  | 0.200271193 | 2.46E-05    |
| RP11-366L20.2 | SEMA3F   | 0.369093264 | 1.33E-15    |
| RP11-366L20.2 | PLA2G12B | 0.596316768 | 1.28E-43    |
| RP11-366L20.2 | KLK6     | 0.432725687 | 1.85E-21    |
| RP11-366L20.2 | ST3GAL5  | 0.427183654 | 0           |
| RP11-366L20.2 | FAM132B  | 0.457963304 | 0           |
| RP11-366L20.2 | CDKN1A   | 0.036059396 | 0.450927682 |
| RP11-366L20.2 | E2F1     | 0.293210966 | 4.55E-10    |
| RP11-366L20.2 | B3GNT8   | 0.31029695  | 3.79E-11    |
| RP11-366L20.2 | MTMR11   | 0.362040412 | 5.91E-15    |
| RP11-366L20.2 | MYO1G    | 0.039673406 | 0.406839495 |
| RP11-366L20.2 | TMSB10   | 0.142409444 | 0.002807071 |
| RP11-366L20.2 | UNC5CL   | 0.262793142 | 2.58E-08    |
| RP11-366L20.2 | ABR      | 0.18904762  | 6.93E-05    |
| RP11-366L20.2 | PLP2     | 0.158657738 | 0.000861616 |
| RP11-366L20.2 | SRCIN1   | 0.5425249   | 0           |
| RP11-366L20.2 | PDE9A    | 0.331259344 | 1.42E-12    |
| RP11-366L20.2 | TREM2    | 0.135462261 | 0.004493262 |
| RP11-366L20.2 | KDELR3   | 0.138618563 | 0.003637831 |
| RP11-366L20.2 | PC       | 0.460443042 | 0           |
| RP11-366L20.2 | C2CD4A   | 0.277939645 | 3.67E-09    |
| RP11-366L20.2 | PELI1    | 0.171284647 | 0.000317825 |
| RP11-366L20.2 | SSX1     | 0.307246743 | 5.97E-11    |
| RP11-366L20.2 | MROH6    | 0.345243208 | 1.34E-13    |
| RP11-366L20.2 | ESPN     | 0.457396239 | 0           |
| RP11-366L20.2 | BMP1     | 0.433806171 | 0           |
| RP11-366L20.2 | TM4SF4   | 0.286510357 | 9.68E-10    |
| RP11-366L20.2 | CORO2A   | 0.439852262 | 0           |
| RP11-366L20.2 | CD164L2  | 0.381701889 | 1.13E-16    |

|               |          |             |             |
|---------------|----------|-------------|-------------|
| RP11-366L20.2 | CTSS     | 0.13404233  | 0.004934311 |
| RP11-366L20.2 | CLU      | 0.296658743 | 2.79E-10    |
| RP11-366L20.2 | TMSB4X   | 0.092113146 | 0.053806991 |
| RP11-366L20.2 | WNT10A   | 0.339409601 | 2.69E-13    |
| RP11-366L20.2 | NAPSA    | 0.110994931 | 0.020051382 |
| RP11-366L20.2 | PLEKHA4  | 0.566982727 | 0           |
| RP11-366L20.2 | SFTPA1   | 0.103850051 | 0.029586534 |
| RP11-366L20.2 | C1orf116 | 0.34905111  | 6.82E-14    |
| RP11-366L20.2 | TM4SF1   | 0.107325179 | 0.024566199 |
| RP11-366L20.2 | SEL1L3   | 0.276240862 | 4.59E-09    |
| RP11-366L20.2 | VASN     | 0.370640707 | 9.36E-16    |
| RP11-366L20.2 | NPTXR    | 0.381028575 | 3.49E-17    |
| RP11-366L20.2 | PDE4C    | 0.371056573 | 8.49E-16    |
| RP11-366L20.2 | CDC42EP1 | 0.267367815 | 1.45E-08    |
| RP11-366L20.2 | ENDOD1   | 0.439404624 | 0           |
| RP11-366L20.2 | RYR1     | 0.392653546 | 0           |
| RP11-366L20.2 | IL1RAP   | 0.345387882 | 1.31E-13    |
| RP11-366L20.2 | SLC35F2  | 0.469983663 | 1.66E-25    |
| RP11-366L20.2 | ISYNA1   | 0.400450475 | 0           |
| RP11-366L20.2 | HLA-G    | 0.12543622  | 0.008546998 |
| RP11-366L20.2 | CDKN2B   | 0.174958087 | 0.000234657 |
| RP11-366L20.2 | ALDH1A3  | 0.10067245  | 0.035010085 |
| RP11-366L20.2 | CLIP3    | 0.357000372 | 1.58E-14    |
| RP11-366L20.2 | ULBP2    | 0.31695748  | 1.37E-11    |
| RP11-366L20.2 | ETHE1    | 0.265125228 | 1.93E-08    |
| RP11-366L20.2 | XPR1     | 0.180786884 | 0.00014322  |
| RP11-366L20.2 | SPTBN2   | 0.396292661 | 0           |
| RP11-366L20.2 | IVL      | 0.149780801 | 0.0016491   |
| RP11-366L20.2 | MARCO    | 0.09023196  | 0.058907824 |
| RP11-366L20.2 | PLXND1   | 0.357147457 | 1.53E-14    |
| RP11-366L20.2 | EMILIN2  | 0.245869703 | 1.99E-07    |
| RP11-366L20.2 | PLAUR    | 0.037864699 | 0.428575447 |
| RP11-366L20.2 | CDC42EP5 | 0.309295296 | 4.40E-11    |
| RP11-366L20.2 | TRPC5    | 0.578379073 | 1.49E-40    |
| RP11-366L20.2 | TMEM100  | 0.131817331 | 0.005704326 |
| RP11-366L20.2 | QSOX1    | 0.295604042 | 3.24E-10    |
| RP11-366L20.2 | ARHGAP23 | 0.386069182 | 0           |
| RP11-366L20.2 | MDF1     | 0.157748279 | 0.000923287 |
| RP11-366L20.2 | FSTL3    | 0.290581163 | 6.57E-10    |
| RP11-366L20.2 | INF2     | 0.494254461 | 0           |
| RP11-366L20.2 | TGFBR1   | 0.556747192 | 0           |
| RP11-366L20.2 | TGFBI    | 0.148322918 | 0.001850532 |
| RP11-366L20.2 | ERBB3    | 0.434477628 | 0           |
| RP11-366L20.2 | CCL18    | 0.082509638 | 0.084206392 |
| RP11-366L20.2 | CCL17    | 0.049161886 | 0.304071847 |
| RP11-366L20.2 | C16orf45 | 0.445574256 | 0           |
| RP11-366L20.2 | PRDM1    | 0.420096903 | 0           |
| RP11-366L20.2 | TRIM47   | 0.20810273  | 1.15E-05    |
| RP11-366L20.2 | CNFN     | 0.281313525 | 2.34E-09    |
| RP11-366L20.2 | ARMCX3   | 0.645035842 | 0           |
| RP11-366L20.2 | RAMP1    | 0.36245869  | 5.44E-15    |

|               |           |             |             |
|---------------|-----------|-------------|-------------|
| RP11-366L20.2 | GABRD     | 0.386434555 | 0           |
| RP11-366L20.2 | COL13A1   | 0.477762916 | 0           |
| RP11-366L20.2 | S100A5    | 0.384953066 | 0           |
| RP11-366L20.2 | MISP      | 0.140622722 | 0.003174316 |
| RP11-366L20.2 | HES6      | 0.452616753 | 0           |
| RP11-366L20.2 | PSD3      | 0.430361656 | 0           |
| RP11-366L20.2 | DOK7      | 0.410111853 | 0           |
| RP11-366L20.2 | ZMAT3     | 0.289786734 | 7.34E-10    |
| RP11-366L20.2 | MFAP2     | 0.344998255 | 1.40E-13    |
| RP11-366L20.2 | TMEM79    | 0.42306754  | 0           |
| RP11-366L20.2 | SLC1A5    | 0.249127418 | 1.36E-07    |
| RP11-366L20.2 | BBC3      | 0.298589572 | 2.12E-10    |
| RP11-366L20.2 | HLA-DQB2  | 0.030370167 | 0.525504917 |
| RP11-366L20.2 | C1QL1     | 0.542776235 | 0           |
| RP11-366L20.2 | TMEM215   | 0.436752234 | 7.13E-22    |
| RP11-366L20.2 | PNP       | 0.29910983  | 1.96E-10    |
| RP11-366L20.2 | ARNTL     | 0.415482799 | 0           |
| RP11-366L20.2 | CLDN2     | 0.442752422 | 1.68E-22    |
| RP11-366L20.2 | MVP       | 0.143861714 | 0.002537556 |
| RP11-366L20.2 | LGALS1    | 0.046049552 | 0.335609168 |
| RP11-366L20.2 | BIRC7     | 0.388575578 | 2.84E-17    |
| RP11-366L20.2 | COL8A1    | 0.367331646 | 1.97E-15    |
| RP11-366L20.2 | PERP      | 0.325971939 | 3.34E-12    |
| RP11-366L20.2 | GJA4      | 0.446322872 | 0           |
| RP11-366L20.2 | IGFL2     | 0.211183444 | 8.10E-06    |
| RP11-366L20.2 | DAPK2     | 0.605832343 | 0           |
| RP11-366L20.2 | MAMLD1    | 0.430662493 | 0           |
| RP11-366L20.2 | ETV5      | 0.447456151 | 0           |
| RP11-366L20.2 | RUNX1     | 0.191017454 | 5.80E-05    |
| RP11-366L20.2 | LONRF2    | 0.555620296 | 0           |
| RP11-366L20.2 | SPOCK1    | 0.312273025 | 2.81E-11    |
| RP11-366L20.2 | XKRX      | 0.419018941 | 0           |
| RP11-366L20.2 | TGFB1     | 0.178711665 | 0.000171043 |
| RP11-366L20.2 | ERP27     | 0.393827674 | 0           |
| RP11-366L20.2 | TNFRSF10C | 0.251688146 | 1.00E-07    |
| RP11-366L20.2 | PALM      | 0.450154461 | 0           |
| RP11-366L20.2 | TSC22D1   | 0.475820315 | 0           |
| RP11-366L20.2 | TGM2      | 0.059444225 | 0.213761477 |
| RP11-366L20.2 | UBE2QL1   | 0.617003577 | 0           |
| RP11-366L20.2 | ECE1      | 0.349244008 | 6.59E-14    |
| RP11-366L20.2 | COL8A2    | 0.197091204 | 3.32E-05    |
| RP11-366L20.2 | HIST3H2A  | 0.326224551 | 3.21E-12    |
| RP11-366L20.2 | TNFRSF21  | 0.17833069  | 0.000176672 |
| RP11-366L20.2 | SOX4      | 0.290047572 | 7.08E-10    |
| RP11-366L20.2 | ELF3      | 0.238828482 | 4.47E-07    |
| RP11-366L20.2 | TPD52L1   | 0.615539251 | 0           |
| RP11-366L20.2 | INHBB     | 0.496876321 | 0           |
| RP11-366L20.2 | HPN       | 0.434806974 | 0           |
| RP11-366L20.2 | MMP7      | 0.132082261 | 0.005576554 |
| RP11-366L20.2 | RAB27A    | 0.464880559 | 0           |
| RP11-366L20.2 | IGF2BP2   | 0.581272109 | 0           |

|               |            |             |             |
|---------------|------------|-------------|-------------|
| RP11-366L20.2 | ITGB4      | 0.151908844 | 0.001426867 |
| RP11-366L20.2 | PPP1R1B    | 0.43913868  | 0           |
| RP11-366L20.2 | NPDC1      | 0.370897006 | 8.81E-16    |
| RP11-366L20.2 | CCL13      | 0.10082184  | 0.034702493 |
| RP11-366L20.2 | SPINT1     | 0.295036268 | 3.51E-10    |
| RP11-366L20.2 | HEY2       | 0.570659713 | 0           |
| RP11-366L20.2 | CST2       | 0.158247091 | 0.000877298 |
| RP11-366L20.2 | ADM        | 0.38591302  | 0           |
| RP11-366L20.2 | VSTM2L     | 0.08169606  | 0.087318772 |
| RP11-366L20.2 | FAM84A     | 0.23569998  | 6.36E-07    |
| RP11-366L20.2 | P4HA2      | 0.370558867 | 9.54E-16    |
| RP11-366L20.2 | LPL        | 0.299599594 | 1.83E-10    |
| RP11-366L20.2 | TMEM173    | 0.142451144 | 0.002798982 |
| RP11-366L20.2 | DHRS3      | 0.566510977 | 0           |
| RP11-366L20.2 | SCN1B      | 0.236273002 | 5.96E-07    |
| RP11-366L20.2 | GLT1D1     | 0.467635745 | 0           |
| RP11-366L20.2 | PHYHIP     | 0.307067035 | 6.13E-11    |
| RP11-366L20.2 | BHLHE40    | 0.217761129 | 4.36E-06    |
| RP11-366L20.2 | BID        | 0.469447998 | 0           |
| RP11-366L20.2 | POSTN      | 0.029857709 | 0.532518445 |
| RP11-366L20.2 | ITGA3      | 0.290040197 | 7.08E-10    |
| RP11-366L20.2 | RSPO4      | 0.421039553 | 0           |
| RP11-366L20.2 | ADAMTS9    | 0.523225405 | 0           |
| RP11-366L20.2 | ABTB2      | 0.352277904 | 3.81E-14    |
| RP11-366L20.2 | KCNQ3      | 0.35129242  | 4.55E-14    |
| RP11-366L20.2 | ANXA1      | 0.482928625 | 0           |
| RP11-366L20.2 | S100A11    | 0.14584091  | 0.002208214 |
| RP11-366L20.2 | CEACAM6    | 0.164258309 | 0.000549725 |
| RP11-366L20.2 | IER5L      | 0.373033783 | 5.24E-16    |
| RP11-366L20.2 | KRT80      | 0.309510321 | 4.26E-11    |
| RP11-366L20.2 | CDH6       | 0.10958507  | 0.021692418 |
| RP11-366L20.2 | UNC5B      | 0.272695501 | 7.30E-09    |
| RP11-366L20.2 | PLEKHN1    | 0.374379959 | 3.70E-16    |
| RP11-366L20.2 | SYTL1      | 0.22158747  | 2.93E-06    |
| RP11-366L20.2 | TMEM163    | 0.245632267 | 2.05E-07    |
| RP11-366L20.2 | C4orf48    | 0.141675011 | 0.00295307  |
| RP11-366L20.2 | B3GNT7     | 0.428916336 | 0           |
| RP11-366L20.2 | BAIAP3     | 0.5431287   | 0           |
| RP11-366L20.2 | PHLDA2     | 0.167933603 | 0.000416976 |
| RP11-366L20.2 | GAP43      | 0.30536161  | 6.29E-11    |
| RP11-366L20.2 | S100A1     | 0.305203011 | 8.08E-11    |
| RP11-366L20.2 | PTPRE      | 0.412295152 | 0           |
| RP11-366L20.2 | CCND1      | 0.336792126 | 5.69E-13    |
| RP11-366L20.2 | ST6GALNAC5 | 0.230222961 | 1.08E-06    |
| RP11-366L20.2 | KRT17      | 0.109017579 | 0.022385164 |
| RP11-366L20.2 | HPCAL4     | 0.561353495 | 0           |
| RP11-366L20.2 | GABBR2     | 0.38512242  | 0           |
| RP11-366L20.2 | DIRAS3     | 0.490167708 | 0           |
| RP11-366L20.2 | SERINC2    | 0.318631584 | 1.06E-11    |
| RP11-366L20.2 | PTCHD4     | 0.245947997 | 1.97E-07    |
| RP11-366L20.2 | EPS8       | 0.548767861 | 0           |

|               |         |             |             |
|---------------|---------|-------------|-------------|
| RP11-366L20.2 | LY6E    | 0.313887699 | 2.20E-11    |
| RP11-366L20.2 | UPP1    | 0.252147272 | 9.49E-08    |
| RP11-366L20.2 | AHNAK2  | 0.266051283 | 1.71E-08    |
| RP11-366L20.2 | PLXNC1  | 0.511778155 | 0           |
| RP11-366L20.2 | TNC     | 0.046776042 | 0.328034597 |
| RP11-366L20.2 | DUSP4   | 0.250062834 | 1.22E-07    |
| RP11-366L20.2 | NRCAM   | 0.563999325 | 0           |
| RP11-366L20.2 | NRP2    | 0.37177356  | 7.15E-16    |
| RP11-366L20.2 | CTSC    | 0.227337263 | 1.59E-06    |
| RP11-366L20.2 | AMIGO2  | 0.379967916 | 5.91E-17    |
| RP11-366L20.2 | NAB2    | 0.558551928 | 0           |
| RP11-366L20.2 | TBC1D2  | 0.310105045 | 3.90E-11    |
| RP11-366L20.2 | PHLDA3  | 0.231636488 | 9.96E-07    |
| RP11-366L20.2 | PTP4A3  | 0.295851264 | 3.13E-10    |
| RP11-366L20.2 | CRABP2  | 0.315816542 | 1.64E-11    |
| RP11-366L20.2 | GOS2    | 0.219144325 | 3.78E-06    |
| RP11-366L20.2 | S100A6  | 0.216541897 | 4.94E-06    |
| RP11-366L20.2 | FOXQ1   | 0.312263664 | 2.82E-11    |
| RP11-366L20.2 | LRG1    | 0.364714184 | 3.43E-15    |
| RP11-366L20.2 | LAMP5   | 0.166648842 | 0.000462114 |
| RP11-366L20.2 | ALDH3B1 | 0.318101397 | 1.15E-11    |
| RP11-366L20.2 | CDH2    | 0.297864926 | 2.35E-10    |
| RP11-366L20.2 | SCG5    | 0.411037198 | 0           |
| RP11-366L20.2 | ZCCHC16 | 0.61757908  | 1.63E-47    |
| RP11-366L20.2 | GRB7    | 0.474619096 | 0           |
| RP11-366L20.2 | TIAM1   | 0.334517342 | 8.31E-13    |
| RP11-366L20.2 | FXYD5   | 0.136013582 | 0.004331846 |
| RP11-366L20.2 | CLDN9   | 0.427473143 | 0           |
| RP11-366L20.2 | FAM43A  | 0.567353206 | 0           |
| RP11-366L20.2 | CHST2   | 0.402959148 | 0           |
| RP11-366L20.2 | HMGA2   | 0.320382563 | 8.08E-12    |
| RP11-366L20.2 | GALNT7  | 0.53243489  | 0           |
| RP11-366L20.2 | CBLN1   | 0.241783091 | 3.19E-07    |
| RP11-366L20.2 | STRA6   | 0.318810157 | 1.03E-11    |
| RP11-366L20.2 | MUC21   | 0.318873042 | 7.84E-12    |
| RP11-366L20.2 | PRR36   | 0.451381777 | 0           |
| RP11-366L20.2 | NFE2L3  | 0.090642437 | 0.057761935 |
| RP11-366L20.2 | NR1D1   | 0.323817149 | 4.70E-12    |
| RP11-366L20.2 | MUC1    | 0.135164545 | 0.00458267  |
| RP11-366L20.2 | NAT8L   | 0.465568895 | 0           |
| RP11-366L20.2 | APOC1   | 0.262465924 | 2.69E-08    |
| RP11-366L20.2 | EVA1A   | 0.238838552 | 4.47E-07    |
| RP11-366L20.2 | ENTPD1  | 0.522446861 | 0           |
| RP11-366L20.2 | COL1A1  | 0.024751289 | 0.604883644 |
| RP11-366L20.2 | FNDC4   | 0.156866194 | 0.000986975 |
| RP11-366L20.2 | FRMD3   | 0.607854231 | 0           |
| RP11-366L20.2 | SHROOM4 | 0.507225325 | 0           |
| RP11-366L20.2 | NELL2   | 0.474133446 | 0           |
| RP11-366L20.2 | EPHB3   | 0.319048159 | 9.94E-12    |
| RP11-366L20.2 | TMC6    | 0.305536329 | 7.69E-11    |
| RP11-366L20.2 | NOD1    | 0.614433914 | 0           |



|               |           |             |             |
|---------------|-----------|-------------|-------------|
| RP11-366L20.2 | GGCT      | 0.560168162 | 0           |
| RP11-366L20.2 | ICAM1     | 0.297186235 | 2.59E-10    |
| RP11-366L20.2 | PRSS23    | 0.223680702 | 2.35E-06    |
| RP11-366L20.2 | CFI       | 0.279709915 | 2.90E-09    |
| RP11-366L20.2 | CD55      | 0.266386018 | 1.64E-08    |
| RP11-366L20.2 | RASD2     | 0.444386086 | 0           |
| RP11-366L20.2 | KLK11     | 0.478241265 | 1.80E-26    |
| RP11-366L20.2 | ICAM5     | 0.543813915 | 0           |
| RP11-366L20.2 | ADORA1    | 0.317691771 | 1.23E-11    |
| RP11-366L20.2 | ITGA2     | 0.27545012  | 5.09E-09    |
| RP11-366L20.2 | ABCC3     | 0.502503851 | 0           |
| RP11-366L20.2 | MFGE8     | 0.319527569 | 9.23E-12    |
| RP11-366L20.2 | STK32A    | 0.384715205 | 0           |
| RP11-366L20.2 | CYSLTR2   | 0.439291438 | 0           |
| RP11-366L20.2 | LAD1      | 0.419820037 | 0           |
| RP11-366L20.2 | MGAT3     | 0.298819631 | 2.05E-10    |
| RP11-366L20.2 | IGFBP6    | 0.283929853 | 1.64E-09    |
| RP11-366L20.2 | CYP2S1    | 0.25110789  | 1.07E-07    |
| RP11-366L20.2 | KCNJ2     | 0.380340948 | 4.98E-17    |
| RP11-366L20.2 | FAM20A    | 0.166244607 | 0.000477231 |
| RP11-366L20.2 | TGFA      | 0.49931592  | 0           |
| RP11-366L20.2 | MXRA8     | 0.352871918 | 3.41E-14    |
| RP11-366L20.2 | C8orf4    | 0.051416953 | 0.282278763 |
| RP11-366L20.2 | CLDN10    | 0.238259482 | 4.40E-07    |
| RP11-366L20.2 | PDE5A     | 0.57689232  | 0           |
| RP11-366L20.2 | APOE      | 0.346212807 | 1.13E-13    |
| RP11-366L20.2 | SPOCK2    | 0.215851718 | 5.30E-06    |
| RP11-366L20.2 | TENM1     | 0.574578956 | 0           |
| RP11-366L20.2 | SLIT1     | 0.288389071 | 8.91E-10    |
| RP11-366L20.2 | CXCL14    | 0.114918855 | 0.016040067 |
| RP11-366L20.2 | ECM1      | 0.162637121 | 0.000634016 |
| RP11-366L20.2 | DUSP5     | 0.267070241 | 1.51E-08    |
| RP11-366L20.2 | SEZ6L2    | 0.318938519 | 1.01E-11    |
| RP11-366L20.2 | THRSP     | 0.482042001 | 0           |
| RP11-366L20.2 | C19orf33  | 0.197728195 | 3.13E-05    |
| RP11-366L20.2 | MPZL2     | 0.35895744  | 1.08E-14    |
| RP11-366L20.2 | CTSH      | 0.491488354 | 0           |
| RP11-366L20.2 | CYP1B1    | 0.421413719 | 0           |
| RP11-366L20.2 | ALOX5     | 0.094277297 | 0.048399269 |
| RP11-366L20.2 | SYTL5     | 0.410770701 | 2.67E-19    |
| RP11-366L20.2 | TNFRSF12A | 0.382777001 | 7.53E-18    |
| RP11-366L20.2 | DUSP6     | 0.3927195   | 0           |
| RP11-366L20.2 | ALOX15B   | 0.237668963 | 5.10E-07    |
| RP11-366L20.2 | SDC4      | 0.461840422 | 0           |
| RP11-366L20.2 | MDK       | 0.35071727  | 5.06E-14    |
| RP11-366L20.2 | KRT19     | 0.193800725 | 4.50E-05    |
| RP11-366L20.2 | MET       | 0.402453357 | 0           |
| RP11-366L20.2 | TESC      | 0.466727562 | 0           |
| RP11-366L20.2 | CXCL17    | 0.346528832 | 7.86E-14    |
| RP11-366L20.2 | NPC2      | 0.499812775 | 0           |
| RP11-366L20.2 | COMP      | 0.169589268 | 0.000364853 |

|               |          |             |             |
|---------------|----------|-------------|-------------|
| RP11-366L20.2 | TUSC3    | 0.381492807 | 2.63E-17    |
| RP11-366L20.2 | TMPRSS4  | 0.242457527 | 2.96E-07    |
| RP11-366L20.2 | LGALS3   | 0.371238976 | 8.13E-16    |
| RP11-366L20.2 | CRLF1    | 0.132107671 | 0.005598062 |
| RP11-366L20.2 | CTXN1    | 0.332857422 | 1.09E-12    |
| RP11-366L20.2 | PCSK1N   | 0.107446591 | 0.024403834 |
| RP11-366L20.2 | NMU      | 0.363263384 | 3.85E-15    |
| RP11-366L20.2 | GALE     | 0.433596819 | 0           |
| RP11-366L20.2 | PCSK2    | 0.158924818 | 0.000844242 |
| RP11-366L20.2 | GJB3     | 0.515206359 | 0           |
| RP11-366L20.2 | SLPI     | 0.026022149 | 0.586467148 |
| RP11-366L20.2 | AGR2     | 0.261386543 | 3.08E-08    |
| RP11-366L20.2 | MRC2     | 0.20709441  | 1.27E-05    |
| RP11-366L20.2 | GOLT1A   | 0.472480192 | 0           |
| RP11-366L20.2 | SLC27A6  | 0.345594622 | 9.25E-14    |
| RP11-366L20.2 | KCNN4    | 0.120130802 | 0.011808823 |
| RP11-366L20.2 | ETV4     | 0.47540943  | 3.88E-26    |
| RP11-366L20.2 | SYT12    | 0.414443842 | 0           |
| RP11-366L20.2 | PVRL4    | 0.415124093 | 0           |
| RP11-366L20.2 | PLCD3    | 0.51990599  | 0           |
| RP11-366L20.2 | PLAU     | 0.127737528 | 0.00740175  |
| RP11-366L20.2 | LRRK2    | 0.440377485 | 0           |
| RP11-366L20.2 | SFN      | 0.175767835 | 0.0002193   |
| RP11-366L20.2 | LPAR5    | 0.527311307 | 0           |
| RP11-366L20.2 | NGEF     | 0.395705881 | 0           |
| RP11-366L20.2 | DTX4     | 0.579308941 | 0           |
| RP11-366L20.2 | CST6     | 0.378028152 | 1.25E-16    |
| RP11-366L20.2 | QPCT     | 0.463441479 | 0           |
| RP11-366L20.2 | TIMP1    | 0.360732816 | 7.67E-15    |
| RP11-366L20.2 | CAMK2N1  | 0.383750855 | 0           |
| RP11-366L20.2 | KLHDC8A  | 0.263892096 | 2.25E-08    |
| RP11-366L20.2 | PDLIM4   | 0.372588556 | 5.86E-16    |
| RP11-366L20.2 | SCEL     | 0.306711308 | 6.47E-11    |
| RP11-366L20.2 | LCN2     | 0.233879217 | 7.78E-07    |
| RP11-366L20.2 | PROS1    | 0.464443133 | 0           |
| RP11-366L20.2 | GABRB2   | 0.511040035 | 0           |
| RP11-366L20.2 | TMPRSS6  | 0.371983053 | 6.80E-16    |
| RP11-366L20.2 | KLK7     | 0.479173303 | 1.39E-26    |
| RP11-366L20.2 | PDZK1IP1 | 0.154627153 | 0.001167295 |
| RP11-366L20.2 | CDH3     | 0.407163201 | 0           |
| RP11-366L20.2 | LRP4     | 0.495862753 | 0           |
| RP11-366L20.2 | IGSF1    | 0.325319488 | 3.71E-12    |
| RP11-366L20.2 | B3GNT3   | 0.20569703  | 1.46E-05    |
| RP11-366L20.2 | CLDN1    | 0.23350732  | 8.11E-07    |
| RP11-366L20.2 | GDF15    | 0.344872588 | 1.43E-13    |
| RP11-366L20.2 | ARHGAP36 | 0.318679604 | 8.08E-12    |
| RP11-366L20.2 | LAMB3    | 0.176363409 | 0.000208612 |
| RP11-366L20.2 | KLK10    | 0.511826096 | 0           |
| RP11-366L20.2 | DPP4     | 0.341903086 | 2.39E-13    |
| RP11-366L20.2 | METTL7B  | 0.54772862  | 0           |
| RP11-366L20.2 | LIPH     | 0.360499919 | 8.03E-15    |

|                 |           |              |             |
|-----------------|-----------|--------------|-------------|
| RP11-366L20.2   | CLDN16    | 0.3546663    | 2.45E-14    |
| RP11-366L20.2   | CHI3L1    | 0.337709245  | 4.87E-13    |
| RP11-366L20.2   | SLC22A31  | 0.321820693  | 4.91E-12    |
| RP11-366L20.2   | TACSTD2   | 0.42485639   | 0           |
| RP11-366L20.2   | SFTPB     | 0.193339045  | 4.70E-05    |
| RP11-366L20.2   | RXRG      | 0.554840334  | 0           |
| RP11-366L20.2   | DCSTAMP   | 0.497945256  | 6.94E-29    |
| RP11-366L20.2   | CITED1    | 0.546517615  | 0           |
| RP11-366L20.2   | SERPINA1  | 0.345125909  | 1.37E-13    |
| RP11-366L20.2   | PRR15     | 0.475281618  | 0           |
| RP11-366L20.2   | SLC34A2   | 0.40169155   | 0           |
| RP11-366L20.2   | FN1       | 0.256765915  | 5.43E-08    |
| RP11-366L20.2   | ZCCHC12   | 0.471395706  | 0           |
| XXbac-B33L19.12 | TFF3      | -0.226952056 | 1.55E-06    |
| XXbac-B33L19.12 | CCL21     | -0.195126452 | 3.85E-05    |
| XXbac-B33L19.12 | TPO       | -0.260371957 | 3.10E-08    |
| XXbac-B33L19.12 | MT1G      | -0.306291583 | 5.47E-11    |
| XXbac-B33L19.12 | DIO1      | -0.338475911 | 3.15E-13    |
| XXbac-B33L19.12 | DPT       | -0.250684954 | 1.02E-07    |
| XXbac-B33L19.12 | CDH16     | -0.306912561 | 4.98E-11    |
| XXbac-B33L19.12 | CRABP1    | -0.157864672 | 0.000903286 |
| XXbac-B33L19.12 | SLC26A7   | -0.216879637 | 4.52E-06    |
| XXbac-B33L19.12 | MT1H      | -0.312620443 | 2.08E-11    |
| XXbac-B33L19.12 | SLC26A4   | -0.209586227 | 9.51E-06    |
| XXbac-B33L19.12 | SLC5A8    | -0.350779052 | 3.72E-14    |
| XXbac-B33L19.12 | PKHD1L1   | -0.301691243 | 1.09E-10    |
| XXbac-B33L19.12 | TFCP2L1   | -0.356528264 | 1.32E-14    |
| XXbac-B33L19.12 | WSCD2     | -0.219757398 | 3.35E-06    |
| XXbac-B33L19.12 | IPCEF1    | -0.294094473 | 3.30E-10    |
| XXbac-B33L19.12 | SLC5A5    | -0.233986125 | 7.14E-07    |
| XXbac-B33L19.12 | MT1F      | -0.3029238   | 9.06E-11    |
| XXbac-B33L19.12 | FOSB      | -0.030827171 | 0.519437624 |
| XXbac-B33L19.12 | SEMA3D    | -0.243481766 | 2.41E-07    |
| XXbac-B33L19.12 | BMP8A     | -0.229603522 | 1.16E-06    |
| XXbac-B33L19.12 | MATN2     | -0.301970414 | 1.04E-10    |
| XXbac-B33L19.12 | PLA2R1    | -0.280809764 | 2.13E-09    |
| XXbac-B33L19.12 | COL23A1   | -0.250542282 | 1.04E-07    |
| XXbac-B33L19.12 | HGD       | -0.297506662 | 2.01E-10    |
| XXbac-B33L19.12 | TCEAL2    | -0.248955432 | 1.26E-07    |
| XXbac-B33L19.12 | CHRD1     | -0.140819511 | 0.003108181 |
| XXbac-B33L19.12 | TNFRSF11B | -0.27454621  | 4.95E-09    |
| XXbac-B33L19.12 | FAM167A   | -0.229073058 | 1.23E-06    |
| XXbac-B33L19.12 | KIT       | -0.235511116 | 6.01E-07    |
| XXbac-B33L19.12 | SLC4A4    | -0.304957125 | 6.69E-11    |
| XXbac-B33L19.12 | SMOC2     | -0.158431201 | 0.000865035 |
| XXbac-B33L19.12 | FHL1      | -0.251404303 | 9.37E-08    |
| XXbac-B33L19.12 | OTOS      | -0.322202362 | 4.61E-12    |
| XXbac-B33L19.12 | IGFBPL1   | -0.340510419 | 2.23E-13    |
| XXbac-B33L19.12 | HBB       | -0.080321146 | 0.092795293 |
| XXbac-B33L19.12 | BEX1      | -0.120620471 | 0.01142854  |
| XXbac-B33L19.12 | FABP4     | -0.170425457 | 0.000334628 |

|                 |            |              |             |
|-----------------|------------|--------------|-------------|
| XXbac-B33L19.12 | LMOD1      | -0.157493278 | 0.000929203 |
| XXbac-B33L19.12 | SOD3       | -0.327521325 | 1.95E-12    |
| XXbac-B33L19.12 | TMEM171    | -0.32952585  | 1.41E-12    |
| XXbac-B33L19.12 | PI16       | -0.103129936 | 0.03074057  |
| XXbac-B33L19.12 | ZMAT4      | -0.324065407 | 3.42E-12    |
| XXbac-B33L19.12 | MFAP4      | -0.049546753 | 0.300297222 |
| XXbac-B33L19.12 | CWH43      | -0.339914871 | 2.46E-13    |
| XXbac-B33L19.12 | SPX        | -0.244360164 | 2.17E-07    |
| XXbac-B33L19.12 | APOD       | -0.073587    | 0.123679644 |
| XXbac-B33L19.12 | DPP6       | -0.276104969 | 4.02E-09    |
| XXbac-B33L19.12 | MMRN1      | -0.257507682 | 4.44E-08    |
| XXbac-B33L19.12 | WDR72      | -0.272341361 | 6.64E-09    |
| XXbac-B33L19.12 | MPPED2     | -0.227871961 | 1.40E-06    |
| XXbac-B33L19.12 | PAPSS2     | -0.272176788 | 6.78E-09    |
| XXbac-B33L19.12 | DCN        | -0.172066904 | 0.000292365 |
| XXbac-B33L19.12 | SORBS2     | -0.299798053 | 1.44E-10    |
| XXbac-B33L19.12 | EGR2       | 0.012487666  | 0.794162023 |
| XXbac-B33L19.12 | EDN3       | -0.080213269 | 0.093236163 |
| XXbac-B33L19.12 | DIO2       | -0.249116742 | 1.23E-07    |
| XXbac-B33L19.12 | ITPR1      | -0.258614292 | 3.87E-08    |
| XXbac-B33L19.12 | CFD        | -0.193155625 | 4.62E-05    |
| XXbac-B33L19.12 | CPXM1      | -0.153997101 | 0.001209094 |
| XXbac-B33L19.12 | ELMO1      | -0.271400601 | 7.51E-09    |
| XXbac-B33L19.12 | GPC3       | -0.206584768 | 1.28E-05    |
| XXbac-B33L19.12 | MYOC       | 0.03053046   | 0.523467757 |
| XXbac-B33L19.12 | DEPTOR     | -0.311405255 | 2.51E-11    |
| XXbac-B33L19.12 | DGKI       | -0.223911433 | 2.15E-06    |
| XXbac-B33L19.12 | CARTPT     | -0.198645641 | 2.76E-05    |
| XXbac-B33L19.12 | IYD        | -0.277957264 | 3.13E-09    |
| XXbac-B33L19.12 | LYVE1      | -0.187864895 | 7.49E-05    |
| XXbac-B33L19.12 | CLCNKB     | -0.198648666 | 2.76E-05    |
| XXbac-B33L19.12 | NCAM1      | -0.41345043  | 1.48E-19    |
| XXbac-B33L19.12 | HBA2       | -0.039165759 | 0.413021377 |
| XXbac-B33L19.12 | GLT8D2     | -0.194255992 | 4.17E-05    |
| XXbac-B33L19.12 | OGDHL      | -0.402321907 | 1.65E-18    |
| XXbac-B33L19.12 | LIFR       | -0.266319275 | 1.46E-08    |
| XXbac-B33L19.12 | CSGALNACT1 | -0.298229221 | 1.81E-10    |
| XXbac-B33L19.12 | RAP1GAP    | -0.338521736 | 3.12E-13    |
| XXbac-B33L19.12 | COL9A3     | -0.146522519 | 0.002084913 |
| XXbac-B33L19.12 | FBLN1      | -0.167460428 | 0.000425735 |
| XXbac-B33L19.12 | EFEMP1     | -0.248828172 | 1.28E-07    |
| XXbac-B33L19.12 | AOX1       | -0.324650323 | 3.11E-12    |
| XXbac-B33L19.12 | GRIN2C     | -0.277328908 | 3.41E-09    |
| XXbac-B33L19.12 | C11orf74   | -0.276127669 | 4.01E-09    |
| XXbac-B33L19.12 | PPARGC1A   | -0.40828696  | 4.58E-19    |
| XXbac-B33L19.12 | ANGPTL1    | -0.173889689 | 0.000251298 |
| XXbac-B33L19.12 | SCARA5     | -0.181575804 | 0.000130542 |
| XXbac-B33L19.12 | LTF        | -0.298186659 | 1.82E-10    |
| XXbac-B33L19.12 | CA4        | -0.093979086 | 0.049088348 |
| XXbac-B33L19.12 | TG         | -0.128340494 | 0.007091676 |
| XXbac-B33L19.12 | FCGBP      | -0.238798456 | 4.14E-07    |

|                 |          |              |             |
|-----------------|----------|--------------|-------------|
| XXbac-B33L19.12 | PBX4     | -0.205072677 | 1.49E-05    |
| XXbac-B33L19.12 | CYR61    | -0.054995245 | 0.25020012  |
| XXbac-B33L19.12 | FOS      | -0.095032531 | 0.046592989 |
| XXbac-B33L19.12 | KHDRBS2  | -0.153024135 | 0.001299767 |
| XXbac-B33L19.12 | MUM1L1   | -0.321601104 | 5.08E-12    |
| XXbac-B33L19.12 | RGS16    | -0.268201363 | 1.14E-08    |
| XXbac-B33L19.12 | MT1M     | -0.249629045 | 1.16E-07    |
| XXbac-B33L19.12 | LRP2     | -0.227909558 | 1.40E-06    |
| XXbac-B33L19.12 | MAFB     | -0.301345321 | 1.15E-10    |
| XXbac-B33L19.12 | KCNK2    | -0.233902701 | 7.21E-07    |
| XXbac-B33L19.12 | TBC1D4   | -0.248030136 | 1.41E-07    |
| XXbac-B33L19.12 | MIOX     | -0.198846444 | 2.71E-05    |
| XXbac-B33L19.12 | TPPP     | -0.244418616 | 2.16E-07    |
| XXbac-B33L19.12 | FMOD     | -0.347077675 | 7.14E-14    |
| XXbac-B33L19.12 | CITED2   | -0.224476513 | 2.03E-06    |
| XXbac-B33L19.12 | RGS8     | -0.235097405 | 6.30E-07    |
| XXbac-B33L19.12 | ABI3BP   | -0.259496033 | 3.46E-08    |
| XXbac-B33L19.12 | ADH1B    | -0.216908017 | 4.51E-06    |
| XXbac-B33L19.12 | OGN      | -0.18485423  | 9.79E-05    |
| XXbac-B33L19.12 | NR4A1    | -0.001734966 | 0.971084652 |
| XXbac-B33L19.12 | FOXJ1    | -0.122994231 | 0.009895248 |
| XXbac-B33L19.12 | ALDH1A1  | -0.286974432 | 9.07E-10    |
| XXbac-B33L19.12 | OCA2     | -0.21790539  | 4.06E-06    |
| XXbac-B33L19.12 | TMEM139  | -0.232563845 | 8.37E-07    |
| XXbac-B33L19.12 | ARHGAP24 | -0.337907    | 3.47E-13    |
| XXbac-B33L19.12 | SLC25A15 | -0.323581652 | 3.70E-12    |
| XXbac-B33L19.12 | DES      | -0.133113108 | 0.005213795 |
| XXbac-B33L19.12 | GDF10    | -0.198496392 | 2.80E-05    |
| XXbac-B33L19.12 | KIAA1324 | -0.286480146 | 9.72E-10    |
| XXbac-B33L19.12 | JUN      | -0.079337115 | 0.09687915  |
| XXbac-B33L19.12 | C7       | -0.158943505 | 0.000831739 |
| XXbac-B33L19.12 | LGI3     | -0.271500054 | 7.41E-09    |
| XXbac-B33L19.12 | CDON     | -0.276676292 | 3.72E-09    |
| XXbac-B33L19.12 | BCL2     | -0.339566489 | 2.62E-13    |
| XXbac-B33L19.12 | HLF      | -0.20864802  | 1.04E-05    |
| XXbac-B33L19.12 | EGR1     | -0.055711421 | 0.24407539  |
| XXbac-B33L19.12 | IP6K3    | -0.272490328 | 6.51E-09    |
| XXbac-B33L19.12 | SCUBE3   | -0.231199594 | 9.74E-07    |
| XXbac-B33L19.12 | PKNOX2   | -0.149406514 | 0.001694526 |
| XXbac-B33L19.12 | SMAD9    | -0.31920572  | 7.44E-12    |
| XXbac-B33L19.12 | IQGAP2   | -0.3208706   | 5.71E-12    |
| XXbac-B33L19.12 | GNA14    | -0.226692996 | 1.60E-06    |
| XXbac-B33L19.12 | LAYN     | -0.160722451 | 0.000725105 |
| XXbac-B33L19.12 | AVPR1A   | -0.187236823 | 7.92E-05    |
| XXbac-B33L19.12 | PDLIM3   | -0.333849289 | 6.87E-13    |
| XXbac-B33L19.12 | GPM6A    | -0.22610096  | 1.70E-06    |
| XXbac-B33L19.12 | SDPR     | -0.025671078 | 0.591665755 |
| XXbac-B33L19.12 | CRYAB    | -0.333843756 | 6.87E-13    |
| XXbac-B33L19.12 | FOXA2    | -0.148965301 | 0.001749547 |
| XXbac-B33L19.12 | C8orf88  | -0.190556794 | 5.87E-05    |
| XXbac-B33L19.12 | ISM1     | -0.228858263 | 1.26E-06    |

|                 |          |              |             |
|-----------------|----------|--------------|-------------|
| XXbac-B33L19.12 | BMP2     | -0.154369092 | 0.001175993 |
| XXbac-B33L19.12 | ID4      | -0.257908189 | 4.22E-08    |
| XXbac-B33L19.12 | NUPR1    | -0.431612309 | 2.40E-21    |
| XXbac-B33L19.12 | SERTM1   | -0.412110413 | 1.99E-19    |
| XXbac-B33L19.12 | IRS1     | -0.215385997 | 5.28E-06    |
| XXbac-B33L19.12 | FIBIN    | -0.315460271 | 1.34E-11    |
| XXbac-B33L19.12 | PODN     | -0.168150215 | 0.000402684 |
| XXbac-B33L19.12 | TDRD9    | -0.331436596 | 1.03E-12    |
| XXbac-B33L19.12 | EPHA3    | -0.214719052 | 5.65E-06    |
| XXbac-B33L19.12 | AIF1L    | -0.164893803 | 0.000522726 |
| XXbac-B33L19.12 | EBF4     | -0.211179319 | 8.10E-06    |
| XXbac-B33L19.12 | ADM2     | -0.329196278 | 1.48E-12    |
| XXbac-B33L19.12 | GSTM3    | -0.210229196 | 8.91E-06    |
| XXbac-B33L19.12 | HSD17B6  | -0.105256471 | 0.027439427 |
| XXbac-B33L19.12 | AGR3     | -0.13358648  | 0.005054447 |
| XXbac-B33L19.12 | EPHB1    | -0.296494965 | 2.33E-10    |
| XXbac-B33L19.12 | TMOD1    | -0.28458004  | 1.27E-09    |
| XXbac-B33L19.12 | WASF3    | -0.258963016 | 3.70E-08    |
| XXbac-B33L19.12 | SELV     | -0.287840981 | 8.03E-10    |
| XXbac-B33L19.12 | ENPP1    | -0.246700502 | 1.65E-07    |
| XXbac-B33L19.12 | SYNE1    | -0.262844601 | 2.27E-08    |
| XXbac-B33L19.12 | PLCH1    | -0.279121332 | 2.68E-09    |
| XXbac-B33L19.12 | CCDC146  | -0.213095457 | 6.67E-06    |
| XXbac-B33L19.12 | SLC16A2  | -0.180302493 | 0.000145775 |
| XXbac-B33L19.12 | IER2     | -0.140554061 | 0.003165403 |
| XXbac-B33L19.12 | KCNAB1   | -0.060471971 | 0.206024221 |
| XXbac-B33L19.12 | SYNDIG1  | -0.292012628 | 4.45E-10    |
| XXbac-B33L19.12 | C16orf89 | -0.159819145 | 0.00077756  |
| XXbac-B33L19.12 | CTGF     | 0.036804282  | 0.441776141 |
| XXbac-B33L19.12 | NR4A3    | -0.032508224 | 0.496909437 |
| XXbac-B33L19.12 | KIAA1456 | -0.285310828 | 1.14E-09    |
| XXbac-B33L19.12 | AQP4     | -0.165720639 | 0.00048944  |
| XXbac-B33L19.12 | RNF150   | -0.289376484 | 6.47E-10    |
| XXbac-B33L19.12 | C1S      | -0.206379612 | 1.31E-05    |
| XXbac-B33L19.12 | PFKFB2   | -0.365456619 | 2.56E-15    |
| XXbac-B33L19.12 | PROX1    | -0.180943192 | 0.000137913 |
| XXbac-B33L19.12 | TCF7L1   | -0.195034591 | 3.88E-05    |
| XXbac-B33L19.12 | HSPB6    | -0.093703464 | 0.049759374 |
| XXbac-B33L19.12 | FHDC1    | -0.199537075 | 2.54E-05    |
| XXbac-B33L19.12 | PRR15L   | -0.339136472 | 2.81E-13    |
| XXbac-B33L19.12 | SLC1A1   | -0.319201747 | 7.44E-12    |
| XXbac-B33L19.12 | BTBD11   | -0.195190368 | 3.83E-05    |
| XXbac-B33L19.12 | TRIM58   | -0.313144193 | 1.92E-11    |
| XXbac-B33L19.12 | LRIG1    | -0.285527326 | 1.11E-09    |
| XXbac-B33L19.12 | ROR2     | -0.2246618   | 1.99E-06    |
| XXbac-B33L19.12 | GPR125   | -0.272356825 | 6.62E-09    |
| XXbac-B33L19.12 | FLRT1    | -0.238394402 | 4.33E-07    |
| XXbac-B33L19.12 | PGF      | -0.133455727 | 0.005098017 |
| XXbac-B33L19.12 | DUSP1    | -0.052778621 | 0.269831247 |
| XXbac-B33L19.12 | PLA2G7   | -0.237535077 | 4.78E-07    |
| XXbac-B33L19.12 | PLSCR4   | -0.264019088 | 1.95E-08    |

|                 |          |              |             |
|-----------------|----------|--------------|-------------|
| XXbac-B33L19.12 | FAM46B   | -0.300432793 | 1.31E-10    |
| XXbac-B33L19.12 | GLDC     | -0.269724229 | 9.36E-09    |
| XXbac-B33L19.12 | ZBTB16   | -0.256323326 | 5.14E-08    |
| XXbac-B33L19.12 | OMD      | -0.176739605 | 0.000197739 |
| XXbac-B33L19.12 | HSD11B2  | -0.12207538  | 0.010465647 |
| XXbac-B33L19.12 | FGL2     | -0.217145649 | 4.40E-06    |
| XXbac-B33L19.12 | CLCNKA   | -0.308888793 | 3.69E-11    |
| XXbac-B33L19.12 | GATM     | -0.2424087   | 2.73E-07    |
| XXbac-B33L19.12 | TNS3     | -0.349066877 | 5.03E-14    |
| XXbac-B33L19.12 | TOB1     | -0.193216488 | 4.60E-05    |
| XXbac-B33L19.12 | MARC2    | -0.292395543 | 4.21E-10    |
| XXbac-B33L19.12 | LRRC2    | -0.327819968 | 1.86E-12    |
| XXbac-B33L19.12 | SORD     | -0.206844246 | 1.25E-05    |
| XXbac-B33L19.12 | RIMS4    | -0.199416483 | 2.57E-05    |
| XXbac-B33L19.12 | SLC29A4  | -0.233127507 | 7.86E-07    |
| XXbac-B33L19.12 | SLC39A14 | -0.287046503 | 8.98E-10    |
| XXbac-B33L19.12 | FAXDC2   | -0.261160771 | 2.81E-08    |
| XXbac-B33L19.12 | HSPB8    | -0.340152993 | 2.37E-13    |
| XXbac-B33L19.12 | CCL19    | -0.091225737 | 0.056142745 |
| XXbac-B33L19.12 | KCNIP3   | -0.206483179 | 1.29E-05    |
| XXbac-B33L19.12 | CGNL1    | -0.170270366 | 0.000338903 |
| XXbac-B33L19.12 | ATF3     | 0.025407478  | 0.595478573 |
| XXbac-B33L19.12 | SGCD     | -0.302975017 | 9.00E-11    |
| XXbac-B33L19.12 | STARD13  | -0.204295923 | 1.60E-05    |
| XXbac-B33L19.12 | LDHD     | -0.320948772 | 5.64E-12    |
| XXbac-B33L19.12 | RCAN1    | -0.101880743 | 0.032833918 |
| XXbac-B33L19.12 | ID3      | -0.283814777 | 1.41E-09    |
| XXbac-B33L19.12 | SYTL3    | -0.269714439 | 9.37E-09    |
| XXbac-B33L19.12 | MT1E     | -0.235944822 | 5.73E-07    |
| XXbac-B33L19.12 | CAMK1D   | -0.20810791  | 1.10E-05    |
| XXbac-B33L19.12 | PRKCQ    | -0.31108292  | 2.64E-11    |
| XXbac-B33L19.12 | NUAK2    | -0.323891361 | 3.52E-12    |
| XXbac-B33L19.12 | LIPG     | -0.089848064 | 0.059976748 |
| XXbac-B33L19.12 | SLC25A25 | -0.191355114 | 5.45E-05    |
| XXbac-B33L19.12 | PRKX     | -0.20691646  | 1.24E-05    |
| XXbac-B33L19.12 | SRPX     | -0.107331222 | 0.024517129 |
| XXbac-B33L19.12 | FAM189A1 | -0.158613366 | 0.000853057 |
| XXbac-B33L19.12 | PLEKHH1  | -0.132888802 | 0.00529087  |
| XXbac-B33L19.12 | WNT11    | -0.205662018 | 1.40E-05    |
| XXbac-B33L19.12 | SNAI1    | -0.188317186 | 7.19E-05    |
| XXbac-B33L19.12 | FDCSP    | -0.078759094 | 0.099344007 |
| XXbac-B33L19.12 | MT1X     | -0.207909429 | 1.12E-05    |
| XXbac-B33L19.12 | ACACB    | -0.342476873 | 1.59E-13    |
| XXbac-B33L19.12 | ARC      | 0.097912554  | 0.040308238 |
| XXbac-B33L19.12 | KLK4     | -0.395455357 | 6.95E-18    |
| XXbac-B33L19.12 | ZFPM2    | -0.141851916 | 0.002894456 |
| XXbac-B33L19.12 | AKAP12   | -0.067473832 | 0.158152688 |
| XXbac-B33L19.12 | GJB6     | -0.170134334 | 0.000342694 |
| XXbac-B33L19.12 | ERO1LB   | -0.215357481 | 5.29E-06    |
| XXbac-B33L19.12 | DNALI1   | -0.156015671 | 0.001039263 |
| XXbac-B33L19.12 | HKDC1    | -0.33499917  | 5.66E-13    |

|                 |          |              |             |
|-----------------|----------|--------------|-------------|
| XXbac-B33L19.12 | ZFP36L2  | -0.265106545 | 1.70E-08    |
| XXbac-B33L19.12 | CAPSL    | -0.205805565 | 1.38E-05    |
| XXbac-B33L19.12 | CYP7B1   | -0.24227917  | 2.77E-07    |
| XXbac-B33L19.12 | CPQ      | -0.105528441 | 0.027040057 |
| XXbac-B33L19.12 | RPS6KA6  | -0.251488939 | 9.28E-08    |
| XXbac-B33L19.12 | TLE1     | -0.31611232  | 1.21E-11    |
| XXbac-B33L19.12 | TP53INP2 | -0.173095342 | 0.000268483 |
| XXbac-B33L19.12 | KATNAL2  | -0.262450539 | 2.39E-08    |
| XXbac-B33L19.12 | SGPP2    | -0.355816487 | 1.51E-14    |
| XXbac-B33L19.12 | CTH      | -0.362916666 | 4.11E-15    |
| XXbac-B33L19.12 | KIF12    | -0.161170344 | 0.000700329 |
| XXbac-B33L19.12 | TMEM220  | -0.243576457 | 2.38E-07    |
| XXbac-B33L19.12 | CENPJ    | -0.222789075 | 2.43E-06    |
| XXbac-B33L19.12 | FAM155B  | -0.068682732 | 0.15081546  |
| XXbac-B33L19.12 | WFS1     | -0.33764411  | 3.63E-13    |
| XXbac-B33L19.12 | SELENBP1 | -0.19410206  | 4.23E-05    |
| XXbac-B33L19.12 | SNTA1    | -0.394765748 | 8.01E-18    |
| XXbac-B33L19.12 | FRAS1    | -0.279981934 | 2.38E-09    |
| XXbac-B33L19.12 | FBLN7    | -0.284737945 | 1.24E-09    |
| XXbac-B33L19.12 | AGPAT9   | -0.191587927 | 5.34E-05    |
| XXbac-B33L19.12 | GPR83    | -0.156825908 | 0.000977507 |
| XXbac-B33L19.12 | PRTG     | -0.186566756 | 8.41E-05    |
| XXbac-B33L19.12 | EGR3     | 0.095617757  | 0.045253305 |
| XXbac-B33L19.12 | GRAMD2   | -0.297509783 | 2.01E-10    |
| XXbac-B33L19.12 | HYOU1    | -0.282487554 | 1.69E-09    |
| XXbac-B33L19.12 | FBLN5    | -0.090253537 | 0.058826496 |
| XXbac-B33L19.12 | ITM2A    | -0.113530082 | 0.017329761 |
| XXbac-B33L19.12 | SRF      | -0.083679991 | 0.07988315  |
| XXbac-B33L19.12 | FGFR2    | -0.119875496 | 0.011951284 |
| XXbac-B33L19.12 | MT1A     | -0.175542233 | 0.000218788 |
| XXbac-B33L19.12 | MAMDC2   | -0.084295862 | 0.077681462 |
| XXbac-B33L19.12 | FHL2     | -0.346489894 | 7.91E-14    |
| XXbac-B33L19.12 | FTCDNL1  | -0.379632008 | 1.69E-16    |
| XXbac-B33L19.12 | PKIA     | -0.086978114 | 0.068660125 |
| XXbac-B33L19.12 | DNAJB4   | -0.063494151 | 0.184212002 |
| XXbac-B33L19.12 | SLC25A33 | -0.337745832 | 3.56E-13    |
| XXbac-B33L19.12 | EYA2     | -0.353091531 | 2.46E-14    |
| XXbac-B33L19.12 | LPAR1    | -0.336326534 | 4.53E-13    |
| XXbac-B33L19.12 | STX11    | -0.253483736 | 7.28E-08    |
| XXbac-B33L19.12 | ARHGEF28 | -0.320040643 | 6.51E-12    |
| XXbac-B33L19.12 | OR2W3    | -0.275248482 | 4.51E-09    |
| XXbac-B33L19.12 | ALDH1B1  | -0.386931461 | 3.96E-17    |
| XXbac-B33L19.12 | CXCL12   | -0.148456391 | 0.00181504  |
| XXbac-B33L19.12 | OLFM2    | -0.117801454 | 0.013519527 |
| XXbac-B33L19.12 | TUB      | -0.17215444  | 0.000290258 |
| XXbac-B33L19.12 | HTRA3    | -0.07215919  | 0.131155548 |
| XXbac-B33L19.12 | CKB      | -0.289451535 | 6.40E-10    |
| XXbac-B33L19.12 | RGS2     | -0.134601352 | 0.004727513 |
| XXbac-B33L19.12 | SHANK2   | -0.183995307 | 0.000105626 |
| XXbac-B33L19.12 | CNTFR    | -0.142932743 | 0.002685108 |
| XXbac-B33L19.12 | CYTH3    | -0.196945621 | 3.25E-05    |



|                 |          |              |             |
|-----------------|----------|--------------|-------------|
| XXbac-B33L19.12 | PLAC9    | -0.050846452 | 0.287781161 |
| XXbac-B33L19.12 | WVOX     | -0.224826089 | 1.95E-06    |
| XXbac-B33L19.12 | NPR3     | -0.085932651 | 0.072068687 |
| XXbac-B33L19.12 | SDC2     | -0.033012583 | 0.490253048 |
| XXbac-B33L19.12 | KLF15    | -0.207440113 | 1.18E-05    |
| XXbac-B33L19.12 | TMEM164  | -0.375252812 | 3.97E-16    |
| XXbac-B33L19.12 | LONRF3   | -0.089509413 | 0.060951625 |
| XXbac-B33L19.12 | GBP1     | -0.159746364 | 0.000781936 |
| XXbac-B33L19.12 | ARHGAP6  | -0.249524769 | 1.18E-07    |
| XXbac-B33L19.12 | TMEM119  | -0.154201824 | 0.001190773 |
| XXbac-B33L19.12 | SH3RF1   | -0.262524597 | 2.36E-08    |
| XXbac-B33L19.12 | CRELD2   | -0.232070836 | 8.84E-07    |
| XXbac-B33L19.12 | PCP4     | -0.152056277 | 0.001396132 |
| XXbac-B33L19.12 | GCSH     | -0.236449606 | 5.41E-07    |
| XXbac-B33L19.12 | IMPA2    | -0.177787652 | 0.000180886 |
| XXbac-B33L19.12 | C1R      | -0.20041612  | 2.33E-05    |
| XXbac-B33L19.12 | SUCNR1   | -0.141822548 | 0.002900346 |
| XXbac-B33L19.12 | SFRP1    | -0.162431312 | 0.000634725 |
| XXbac-B33L19.12 | UGT8     | -0.385257416 | 5.55E-17    |
| XXbac-B33L19.12 | TLE4     | -0.143285685 | 0.002619793 |
| XXbac-B33L19.12 | ANTXR1   | -0.215833181 | 5.04E-06    |
| XXbac-B33L19.12 | GPX3     | -0.29127886  | 4.94E-10    |
| XXbac-B33L19.12 | DPY19L2  | -0.216037478 | 4.93E-06    |
| XXbac-B33L19.12 | FAM46C   | -0.332057574 | 9.25E-13    |
| XXbac-B33L19.12 | IL33     | -0.135541833 | 0.004441705 |
| XXbac-B33L19.12 | PEG3     | -0.201232316 | 2.16E-05    |
| XXbac-B33L19.12 | FAHD2A   | -0.295052683 | 2.88E-10    |
| XXbac-B33L19.12 | PTGDS    | -0.054904589 | 0.250982978 |
| XXbac-B33L19.12 | CHCHD10  | -0.383750441 | 7.50E-17    |
| XXbac-B33L19.12 | CD36     | -0.138706449 | 0.003590934 |
| XXbac-B33L19.12 | ANKRD37  | -0.109083355 | 0.022262524 |
| XXbac-B33L19.12 | TSPAN33  | -0.333051679 | 7.84E-13    |
| XXbac-B33L19.12 | PRDM16   | -0.22545487  | 1.82E-06    |
| XXbac-B33L19.12 | UST      | -0.143833315 | 0.00252131  |
| XXbac-B33L19.12 | NEXN     | -0.132447151 | 0.005445631 |
| XXbac-B33L19.12 | NUPR1L   | -0.117734035 | 0.013573412 |
| XXbac-B33L19.12 | SLC24A3  | -0.431417943 | 2.51E-21    |
| XXbac-B33L19.12 | MARC1    | -0.142096789 | 0.002845766 |
| XXbac-B33L19.12 | MYH11    | -0.03590353  | 0.453038117 |
| XXbac-B33L19.12 | APOA1    | -0.279904127 | 2.41E-09    |
| XXbac-B33L19.12 | TMEM178B | -0.206921142 | 1.24E-05    |
| XXbac-B33L19.12 | CAPN6    | -0.076500276 | 0.109457755 |
| XXbac-B33L19.12 | PPM1L    | -0.277413181 | 3.37E-09    |
| XXbac-B33L19.12 | FZD8     | -0.266686301 | 1.39E-08    |
| XXbac-B33L19.12 | RCAN2    | -0.217692002 | 4.16E-06    |
| XXbac-B33L19.12 | COPZ2    | -0.319386324 | 7.23E-12    |
| XXbac-B33L19.12 | GAS1     | -0.189332288 | 6.56E-05    |
| XXbac-B33L19.12 | DACT1    | -0.23769894  | 4.69E-07    |
| XXbac-B33L19.12 | WBSCR17  | -0.094082691 | 0.048838078 |
| XXbac-B33L19.12 | NCS1     | -0.194215842 | 4.19E-05    |
| XXbac-B33L19.12 | SPIRE2   | -0.28441192  | 1.30E-09    |

|                 |          |              |             |
|-----------------|----------|--------------|-------------|
| XXbac-B33L19.12 | C15orf52 | -0.363619931 | 3.61E-15    |
| XXbac-B33L19.12 | SPAG5    | -0.366831511 | 1.98E-15    |
| XXbac-B33L19.12 | ARL4D    | -0.283521525 | 1.47E-09    |
| XXbac-B33L19.12 | FAM189A2 | 0.007598437  | 0.87386323  |
| XXbac-B33L19.12 | MAP1LC3A | -0.201860388 | 2.03E-05    |
| XXbac-B33L19.12 | KLF6     | 0.015758408  | 0.741963418 |
| XXbac-B33L19.12 | ADD3     | -0.117760169 | 0.013552502 |
| XXbac-B33L19.12 | TSPAN7   | -0.02312701  | 0.62891982  |
| XXbac-B33L19.12 | KLF9     | -0.081943465 | 0.086364273 |
| XXbac-B33L19.12 | KCNQ1    | -0.254119895 | 6.74E-08    |
| XXbac-B33L19.12 | MAN1A1   | -0.190881541 | 5.70E-05    |
| XXbac-B33L19.12 | MLF1     | -0.116525589 | 0.01457186  |
| XXbac-B33L19.12 | RARB     | -0.203653663 | 1.71E-05    |
| XXbac-B33L19.12 | CDC42EP2 | -0.250388918 | 1.06E-07    |
| XXbac-B33L19.12 | FAM3B    | -0.152923406 | 0.001309503 |
| XXbac-B33L19.12 | GADD45B  | -0.111673531 | 0.019259262 |
| XXbac-B33L19.12 | TMEM47   | -0.117428186 | 0.013820246 |
| XXbac-B33L19.12 | SDF2L1   | -0.16956171  | 0.000359091 |
| XXbac-B33L19.12 | CCDC85A  | -0.191532455 | 5.37E-05    |
| XXbac-B33L19.12 | CRYBG3   | -0.21443715  | 5.82E-06    |
| XXbac-B33L19.12 | FBLN2    | -0.081776338 | 0.087009739 |
| XXbac-B33L19.12 | PEBP4    | -0.132524188 | 0.005418346 |
| XXbac-B33L19.12 | CDADC1   | -0.216365347 | 4.77E-06    |
| XXbac-B33L19.12 | FAM63A   | -0.300693982 | 1.26E-10    |
| XXbac-B33L19.12 | GLUL     | -0.250021041 | 1.11E-07    |
| XXbac-B33L19.12 | FREM2    | -0.29259828  | 4.09E-10    |
| XXbac-B33L19.12 | ACKR3    | -0.129345806 | 0.006652083 |
| XXbac-B33L19.12 | DENND6A  | -0.259213989 | 3.59E-08    |
| XXbac-B33L19.12 | CLDN8    | -0.268527671 | 1.09E-08    |
| XXbac-B33L19.12 | UTS2R    | -0.060700032 | 0.204315705 |
| XXbac-B33L19.12 | SCNN1B   | -0.155968711 | 0.00104295  |
| XXbac-B33L19.12 | TTC30A   | -0.352220289 | 2.88E-14    |
| XXbac-B33L19.12 | CORO2B   | -0.098722507 | 0.038675583 |
| XXbac-B33L19.12 | TC2N     | -0.401406826 | 2.00E-18    |
| XXbac-B33L19.12 | ALDH2    | -0.348205565 | 5.86E-14    |
| XXbac-B33L19.12 | GPR183   | -0.041501983 | 0.385691294 |
| XXbac-B33L19.12 | C4orf47  | -0.17453961  | 0.000238008 |
| XXbac-B33L19.12 | SLC25A42 | -0.141110487 | 0.003046538 |
| XXbac-B33L19.12 | LGMN     | -0.363827917 | 3.47E-15    |
| XXbac-B33L19.12 | ACSF2    | -0.357398939 | 1.13E-14    |
| XXbac-B33L19.12 | KIAA1467 | -0.259609247 | 3.41E-08    |
| XXbac-B33L19.12 | PRKG1    | -0.138780364 | 0.003572961 |
| XXbac-B33L19.12 | GNAI1    | -0.199850898 | 2.46E-05    |
| XXbac-B33L19.12 | ABCC4    | -0.361854604 | 5.00E-15    |
| XXbac-B33L19.12 | PRPS1    | -0.331898251 | 9.50E-13    |
| XXbac-B33L19.12 | TSPAN5   | -0.34112837  | 2.00E-13    |
| XXbac-B33L19.12 | CR2      | -0.119371296 | 0.012316959 |
| XXbac-B33L19.12 | CCDC170  | -0.379964558 | 1.59E-16    |
| XXbac-B33L19.12 | RRAD     | -0.087282573 | 0.067692686 |
| XXbac-B33L19.12 | SCGB2A1  | -0.30673068  | 5.12E-11    |
| XXbac-B33L19.12 | SESN3    | -0.264448537 | 1.85E-08    |

|                 |          |              |             |
|-----------------|----------|--------------|-------------|
| XXbac-B33L19.12 | SGK223   | -0.205522131 | 1.42E-05    |
| XXbac-B33L19.12 | NDRG2    | -0.234227023 | 6.95E-07    |
| XXbac-B33L19.12 | C3orf52  | -0.196382669 | 3.42E-05    |
| XXbac-B33L19.12 | FLRT3    | 0.2670468    | 1.32E-08    |
| XXbac-B33L19.12 | MST1R    | 0.291372922  | 4.88E-10    |
| XXbac-B33L19.12 | SDC1     | 0.069410541  | 0.146524548 |
| XXbac-B33L19.12 | ST8SIA4  | 0.129746456  | 0.006483807 |
| XXbac-B33L19.12 | UBTD1    | 0.39043181   | 1.95E-17    |
| XXbac-B33L19.12 | EPHA2    | 0.36972487   | 1.15E-15    |
| XXbac-B33L19.12 | TMEM130  | 0.476870523  | 2.61E-26    |
| XXbac-B33L19.12 | SPINK2   | 0.219702911  | 3.37E-06    |
| XXbac-B33L19.12 | MMP16    | 0.240716155  | 3.32E-07    |
| XXbac-B33L19.12 | SIGLEC15 | 0.452090549  | 1.68E-23    |
| XXbac-B33L19.12 | RIN1     | 0.433982582  | 1.37E-21    |
| XXbac-B33L19.12 | IL1RN    | 0.106069545  | 0.026260335 |
| XXbac-B33L19.12 | FCER1G   | 0.114572849  | 0.0163219   |
| XXbac-B33L19.12 | CD276    | 0.342020042  | 1.72E-13    |
| XXbac-B33L19.12 | CTSB     | 0.199302275  | 2.60E-05    |
| XXbac-B33L19.12 | FAM171A2 | 0.459502282  | 2.57E-24    |
| XXbac-B33L19.12 | ASPHD1   | 0.284476189  | 1.28E-09    |
| XXbac-B33L19.12 | C15orf48 | 0.030782906  | 0.520037839 |
| XXbac-B33L19.12 | DYSF     | 0.30682006   | 5.05E-11    |
| XXbac-B33L19.12 | PDZRN4   | 0.375793632  | 3.58E-16    |
| XXbac-B33L19.12 | EFHD2    | 0.353341654  | 2.35E-14    |
| XXbac-B33L19.12 | ASF1B    | 0.113596478  | 0.017264003 |
| XXbac-B33L19.12 | AQP1     | 0.363299723  | 3.83E-15    |
| XXbac-B33L19.12 | ARRDC2   | 0.385238973  | 5.57E-17    |
| XXbac-B33L19.12 | PRSS1    | 0.372996168  | 6.14E-16    |
| XXbac-B33L19.12 | MAPK13   | 0.292050933  | 4.43E-10    |
| XXbac-B33L19.12 | CST5     | 0.228117015  | 1.37E-06    |
| XXbac-B33L19.12 | AHR      | 0.267842141  | 1.20E-08    |
| XXbac-B33L19.12 | BAX      | 0.174284522  | 0.000243144 |
| XXbac-B33L19.12 | C1orf115 | 0.459197538  | 2.78E-24    |
| XXbac-B33L19.12 | PLK3     | 0.380539995  | 1.42E-16    |
| XXbac-B33L19.12 | JAG2     | 0.435990228  | 8.54E-22    |
| XXbac-B33L19.12 | RAD23B   | 0.39812516   | 3.98E-18    |
| XXbac-B33L19.12 | CA12     | 0.173065407  | 0.000269151 |
| XXbac-B33L19.12 | ADTRP    | 0.469828796  | 1.73E-25    |
| XXbac-B33L19.12 | UCP2     | 0.386395664  | 4.41E-17    |
| XXbac-B33L19.12 | IGFBP2   | 0.301658718  | 1.09E-10    |
| XXbac-B33L19.12 | LOXL2    | 0.266478315  | 1.43E-08    |
| XXbac-B33L19.12 | GPX1     | 0.215049474  | 5.46E-06    |
| XXbac-B33L19.12 | P3H3     | 0.32106525   | 5.53E-12    |
| XXbac-B33L19.12 | C2orf81  | 0.446715263  | 6.39E-23    |
| XXbac-B33L19.12 | CDT1     | 0.165719929  | 0.000489468 |
| XXbac-B33L19.12 | SNX25    | 0.452654353  | 1.46E-23    |
| XXbac-B33L19.12 | MTHFD1L  | 0.271851757  | 7.08E-09    |
| XXbac-B33L19.12 | CDC42BPG | 0.330510106  | 1.20E-12    |
| XXbac-B33L19.12 | MSN      | 0.369865325  | 1.12E-15    |
| XXbac-B33L19.12 | SIGLEC6  | 0.374046175  | 5.02E-16    |
| XXbac-B33L19.12 | F2R      | 0.269610305  | 9.50E-09    |

|                 |          |             |             |
|-----------------|----------|-------------|-------------|
| XXbac-B33L19.12 | TMEM184A | 0.286176538 | 1.01E-09    |
| XXbac-B33L19.12 | CKS2     | 0.052187294 | 0.275241503 |
| XXbac-B33L19.12 | TAX1BP3  | 0.248015523 | 1.41E-07    |
| XXbac-B33L19.12 | PMEPA1   | 0.371084014 | 8.85E-16    |
| XXbac-B33L19.12 | CXCL16   | 0.184319487 | 0.00010265  |
| XXbac-B33L19.12 | FAXC     | 0.314796021 | 1.49E-11    |
| XXbac-B33L19.12 | VTCN1    | 0.180057901 | 0.000148886 |
| XXbac-B33L19.12 | SH2D4A   | 0.269137158 | 1.01E-08    |
| XXbac-B33L19.12 | RNF24    | 0.346017883 | 8.59E-14    |
| XXbac-B33L19.12 | LY6G6C   | 0.300601232 | 1.28E-10    |
| XXbac-B33L19.12 | NID1     | 0.236514726 | 5.37E-07    |
| XXbac-B33L19.12 | STAC     | 0.221021195 | 2.93E-06    |
| XXbac-B33L19.12 | RAB34    | 0.446095136 | 7.44E-23    |
| XXbac-B33L19.12 | HES4     | 0.308107842 | 4.16E-11    |
| XXbac-B33L19.12 | EPHA10   | 0.298468561 | 1.75E-10    |
| XXbac-B33L19.12 | ENTPD2   | 0.450826177 | 2.31E-23    |
| XXbac-B33L19.12 | DDB2     | 0.263138482 | 2.19E-08    |
| XXbac-B33L19.12 | NKAIN4   | 0.34746669  | 6.67E-14    |
| XXbac-B33L19.12 | TRIM29   | 0.324072249 | 3.42E-12    |
| XXbac-B33L19.12 | ADCY8    | 0.299574048 | 1.49E-10    |
| XXbac-B33L19.12 | SFTA2    | 0.152782526 | 0.001323232 |
| XXbac-B33L19.12 | NRIP1    | 0.328214233 | 1.74E-12    |
| XXbac-B33L19.12 | VWA1     | 0.366831795 | 1.98E-15    |
| XXbac-B33L19.12 | APLNR    | 0.282977442 | 1.58E-09    |
| XXbac-B33L19.12 | REN      | 0.430681501 | 2.98E-21    |
| XXbac-B33L19.12 | EDIL3    | 0.247528615 | 1.49E-07    |
| XXbac-B33L19.12 | AGRN     | 0.394015949 | 9.35E-18    |
| XXbac-B33L19.12 | TREM1    | 0.255869757 | 5.43E-08    |
| XXbac-B33L19.12 | SRL      | 0.30283669  | 9.18E-11    |
| XXbac-B33L19.12 | RASGRF1  | 0.523346433 | 3.08E-32    |
| XXbac-B33L19.12 | RMI2     | 0.258464048 | 3.94E-08    |
| XXbac-B33L19.12 | SAMD1    | 0.272677316 | 6.35E-09    |
| XXbac-B33L19.12 | MGAT4B   | 0.344184315 | 1.18E-13    |
| XXbac-B33L19.12 | NXN      | 0.311761357 | 2.38E-11    |
| XXbac-B33L19.12 | SH3BGRL3 | 0.213122271 | 6.65E-06    |
| XXbac-B33L19.12 | CA11     | 0.356851026 | 1.25E-14    |
| XXbac-B33L19.12 | PLD3     | 0.409784714 | 3.31E-19    |
| XXbac-B33L19.12 | LURAP1L  | 0.149629539 | 0.001667322 |
| XXbac-B33L19.12 | CARNS1   | 0.426629727 | 7.62E-21    |
| XXbac-B33L19.12 | PDLIM7   | 0.390870765 | 1.78E-17    |
| XXbac-B33L19.12 | BCL2L1   | 0.226300575 | 1.67E-06    |
| XXbac-B33L19.12 | GGT6     | 0.371812958 | 7.70E-16    |
| XXbac-B33L19.12 | DPYSL3   | 0.24030302  | 3.48E-07    |
| XXbac-B33L19.12 | FYN      | 0.383858973 | 7.34E-17    |
| XXbac-B33L19.12 | TK1      | 0.073579623 | 0.123717401 |
| XXbac-B33L19.12 | AK1      | 0.303393117 | 8.45E-11    |
| XXbac-B33L19.12 | HIGD1B   | 0.422357929 | 2.02E-20    |
| XXbac-B33L19.12 | TMEM59L  | 0.286814541 | 9.28E-10    |
| XXbac-B33L19.12 | MEGF9    | 0.332369553 | 8.79E-13    |
| XXbac-B33L19.12 | ZFP36L1  | 0.29509184  | 2.86E-10    |
| XXbac-B33L19.12 | ADRA1B   | 0.42373651  | 1.48E-20    |

|                 |          |              |             |
|-----------------|----------|--------------|-------------|
| XXbac-B33L19.12 | EPHA4    | 0.322066306  | 4.72E-12    |
| XXbac-B33L19.12 | TCERG1L  | 0.460623504  | 1.93E-24    |
| XXbac-B33L19.12 | NGFR     | 0.432978121  | 1.74E-21    |
| XXbac-B33L19.12 | EBI3     | 0.194250033  | 4.18E-05    |
| XXbac-B33L19.12 | S100A10  | 0.138414474  | 0.003662735 |
| XXbac-B33L19.12 | S100B    | 0.211171233  | 8.11E-06    |
| XXbac-B33L19.12 | CD44     | 0.386641955  | 4.20E-17    |
| XXbac-B33L19.12 | BHLHE41  | 0.419578211  | 3.79E-20    |
| XXbac-B33L19.12 | FBX02    | 0.386880444  | 4.00E-17    |
| XXbac-B33L19.12 | SLC30A2  | -0.015843957 | 0.740612708 |
| XXbac-B33L19.12 | FRMD5    | 0.14867374   | 0.001786799 |
| XXbac-B33L19.12 | SAMD11   | 0.339617847  | 2.59E-13    |
| XXbac-B33L19.12 | SIPA1L2  | 0.404397936  | 1.06E-18    |
| XXbac-B33L19.12 | S100A16  | 0.239626144  | 3.76E-07    |
| XXbac-B33L19.12 | PPL      | 0.228365679  | 1.33E-06    |
| XXbac-B33L19.12 | ARHGDIB  | 0.314973788  | 1.45E-11    |
| XXbac-B33L19.12 | CDC42EP3 | 0.195037996  | 3.88E-05    |
| XXbac-B33L19.12 | RUNX2    | 0.445762585  | 8.08E-23    |
| XXbac-B33L19.12 | LAMC2    | 0.192900253  | 4.73E-05    |
| XXbac-B33L19.12 | BRINP1   | 0.377623369  | 2.51E-16    |
| XXbac-B33L19.12 | GPRC5B   | 0.389199217  | 2.51E-17    |
| XXbac-B33L19.12 | AQP5     | 0.382897784  | 8.88E-17    |
| XXbac-B33L19.12 | PLAG1    | 0.485309132  | 2.55E-27    |
| XXbac-B33L19.12 | PTPRU    | 0.260014579  | 3.24E-08    |
| XXbac-B33L19.12 | ANGPTL4  | 0.188230927  | 7.24E-05    |
| XXbac-B33L19.12 | PALM3    | 0.356950337  | 1.23E-14    |
| XXbac-B33L19.12 | ACP5     | 0.126020727  | 0.008206694 |
| XXbac-B33L19.12 | DLG4     | 0.498821548  | 5.37E-29    |
| XXbac-B33L19.12 | ETNK2    | 0.470846593  | 1.32E-25    |
| XXbac-B33L19.12 | CD109    | 0.41543268   | 9.57E-20    |
| XXbac-B33L19.12 | SNX22    | 0.431716727  | 2.34E-21    |
| XXbac-B33L19.12 | TMEM98   | 0.391657877  | 1.52E-17    |
| XXbac-B33L19.12 | CTHRC1   | 0.185866329  | 8.95E-05    |
| XXbac-B33L19.12 | S100A2   | 0.190095707  | 6.12E-05    |
| XXbac-B33L19.12 | C11orf80 | 0.298729465  | 1.68E-10    |
| XXbac-B33L19.12 | SREBF1   | 0.287472264  | 8.46E-10    |
| XXbac-B33L19.12 | PRSS22   | 0.340776241  | 2.13E-13    |
| XXbac-B33L19.12 | CMTM3    | 0.223696212  | 2.20E-06    |
| XXbac-B33L19.12 | RDH5     | 0.500136994  | 3.66E-29    |
| XXbac-B33L19.12 | MYH10    | 0.306060188  | 5.67E-11    |
| XXbac-B33L19.12 | EVPL     | 0.345489548  | 9.42E-14    |
| XXbac-B33L19.12 | SCD      | 0.202108524  | 1.98E-05    |
| XXbac-B33L19.12 | CD151    | 0.398590646  | 3.61E-18    |
| XXbac-B33L19.12 | S100A4   | 0.300893739  | 1.23E-10    |
| XXbac-B33L19.12 | BNIP1    | 0.414372321  | 1.21E-19    |
| XXbac-B33L19.12 | MAP3K6   | 0.306953988  | 4.95E-11    |
| XXbac-B33L19.12 | MANEAL   | 0.230916983  | 1.00E-06    |
| XXbac-B33L19.12 | CD207    | 0.306655847  | 5.18E-11    |
| XXbac-B33L19.12 | CD1A     | 0.274804661  | 4.79E-09    |
| XXbac-B33L19.12 | C3       | 0.172139969  | 0.000290605 |
| XXbac-B33L19.12 | NT5E     | 0.262414503  | 2.40E-08    |

|                 |          |              |             |
|-----------------|----------|--------------|-------------|
| XXbac-B33L19.12 | CACNG4   | 0.24312448   | 2.51E-07    |
| XXbac-B33L19.12 | FHOD1    | 0.375436821  | 3.84E-16    |
| XXbac-B33L19.12 | LEMD1    | 0.28083218   | 2.12E-09    |
| XXbac-B33L19.12 | ATP11A   | 0.331297135  | 1.05E-12    |
| XXbac-B33L19.12 | PPAP2C   | 0.272343915  | 6.63E-09    |
| XXbac-B33L19.12 | DRAM1    | 0.330765253  | 1.15E-12    |
| XXbac-B33L19.12 | CDA      | 0.373897924  | 5.16E-16    |
| XXbac-B33L19.12 | CCND2    | 0.476657997  | 2.77E-26    |
| XXbac-B33L19.12 | LCN6     | 0.4666239    | 4.04E-25    |
| XXbac-B33L19.12 | CDH4     | 0.248185203  | 1.38E-07    |
| XXbac-B33L19.12 | MMP11    | 0.241447226  | 3.05E-07    |
| XXbac-B33L19.12 | B3GAT1   | 0.373636027  | 5.43E-16    |
| XXbac-B33L19.12 | SPP1     | 0.127517914  | 0.00747051  |
| XXbac-B33L19.12 | HLA-DQB1 | -0.001674386 | 0.972093871 |
| XXbac-B33L19.12 | SDC3     | 0.385177116  | 5.64E-17    |
| XXbac-B33L19.12 | CX3CL1   | 0.29731868   | 2.07E-10    |
| XXbac-B33L19.12 | SDK1     | 0.395870939  | 6.37E-18    |
| XXbac-B33L19.12 | DOCK9    | 0.393422494  | 1.06E-17    |
| XXbac-B33L19.12 | CSF2     | 0.335461375  | 5.24E-13    |
| XXbac-B33L19.12 | GRHL3    | 0.340246345  | 2.33E-13    |
| XXbac-B33L19.12 | TMEM92   | 0.294694327  | 3.03E-10    |
| XXbac-B33L19.12 | BASP1    | 0.309735268  | 3.24E-11    |
| XXbac-B33L19.12 | HRH1     | 0.312680552  | 2.06E-11    |
| XXbac-B33L19.12 | ESM1     | 0.255008872  | 6.04E-08    |
| XXbac-B33L19.12 | B4GALNT3 | 0.350239316  | 4.09E-14    |
| XXbac-B33L19.12 | LMO3     | 0.377489441  | 2.57E-16    |
| XXbac-B33L19.12 | C9orf16  | 0.233920151  | 7.19E-07    |
| XXbac-B33L19.12 | SEMA3F   | 0.496824826  | 9.61E-29    |
| XXbac-B33L19.12 | PLA2G12B | 0.441284416  | 2.40E-22    |
| XXbac-B33L19.12 | KLK6     | 0.411172633  | 2.45E-19    |
| XXbac-B33L19.12 | ST3GAL5  | 0.500629578  | 3.16E-29    |
| XXbac-B33L19.12 | FAM132B  | 0.37616988   | 3.33E-16    |
| XXbac-B33L19.12 | CDKN1A   | 0.148272239  | 0.001839287 |
| XXbac-B33L19.12 | E2F1     | 0.211337508  | 7.97E-06    |
| XXbac-B33L19.12 | B3GNT8   | 0.368069637  | 1.57E-15    |
| XXbac-B33L19.12 | MTMR11   | 0.328573881  | 1.64E-12    |
| XXbac-B33L19.12 | MYO1G    | 0.20987352   | 9.24E-06    |
| XXbac-B33L19.12 | TMSB10   | 0.274610195  | 4.91E-09    |
| XXbac-B33L19.12 | UNC5CL   | 0.279672935  | 2.48E-09    |
| XXbac-B33L19.12 | ABR      | 0.232257967  | 8.66E-07    |
| XXbac-B33L19.12 | PLP2     | 0.246181246  | 1.75E-07    |
| XXbac-B33L19.12 | SRCIN1   | 0.256445478  | 5.06E-08    |
| XXbac-B33L19.12 | PDE9A    | 0.352247954  | 2.86E-14    |
| XXbac-B33L19.12 | TREM2    | 0.133946324  | 0.004936265 |
| XXbac-B33L19.12 | KDEL3    | 0.282496209  | 1.69E-09    |
| XXbac-B33L19.12 | PC       | 0.413974225  | 1.32E-19    |
| XXbac-B33L19.12 | C2CD4A   | 0.19582071   | 3.61E-05    |
| XXbac-B33L19.12 | PELI1    | 0.315556177  | 1.32E-11    |
| XXbac-B33L19.12 | SSX1     | 0.298766494  | 1.68E-10    |
| XXbac-B33L19.12 | MROH6    | 0.420457256  | 3.11E-20    |
| XXbac-B33L19.12 | ESPN     | 0.463103871  | 1.01E-24    |

|                 |          |             |             |
|-----------------|----------|-------------|-------------|
| XXbac-B33L19.12 | BMP1     | 0.520371497 | 7.88E-32    |
| XXbac-B33L19.12 | TM4SF4   | 0.367948739 | 1.60E-15    |
| XXbac-B33L19.12 | CORO2A   | 0.382050092 | 1.05E-16    |
| XXbac-B33L19.12 | CD164L2  | 0.299740463 | 1.45E-10    |
| XXbac-B33L19.12 | CTSS     | 0.104692384 | 0.028283941 |
| XXbac-B33L19.12 | CLU      | 0.41023814  | 3.00E-19    |
| XXbac-B33L19.12 | TMSB4X   | 0.287449281 | 8.49E-10    |
| XXbac-B33L19.12 | WNT10A   | 0.343019337 | 1.45E-13    |
| XXbac-B33L19.12 | NAPSA    | 0.282052997 | 1.79E-09    |
| XXbac-B33L19.12 | PLEKHA4  | 0.470834817 | 1.33E-25    |
| XXbac-B33L19.12 | SFTPA1   | 0.286118682 | 1.02E-09    |
| XXbac-B33L19.12 | C1orf116 | 0.315361527 | 1.36E-11    |
| XXbac-B33L19.12 | TM4SF1   | 0.219419306 | 3.47E-06    |
| XXbac-B33L19.12 | SEL1L3   | 0.293874853 | 3.41E-10    |
| XXbac-B33L19.12 | VASN     | 0.387221649 | 3.74E-17    |
| XXbac-B33L19.12 | NPTXR    | 0.311941394 | 2.31E-11    |
| XXbac-B33L19.12 | PDE4C    | 0.281682425 | 1.89E-09    |
| XXbac-B33L19.12 | CDC42EP1 | 0.399228082 | 3.16E-18    |
| XXbac-B33L19.12 | ENDOD1   | 0.360982227 | 5.87E-15    |
| XXbac-B33L19.12 | RYR1     | 0.35769134  | 1.07E-14    |
| XXbac-B33L19.12 | IL1RAP   | 0.416357692 | 7.79E-20    |
| XXbac-B33L19.12 | SLC35F2  | 0.402191327 | 1.69E-18    |
| XXbac-B33L19.12 | ISYNA1   | 0.487598538 | 1.34E-27    |
| XXbac-B33L19.12 | HLA-G    | 0.195292233 | 3.79E-05    |
| XXbac-B33L19.12 | CDKN2B   | 0.2306653   | 1.03E-06    |
| XXbac-B33L19.12 | ALDH1A3  | 0.237995597 | 4.53E-07    |
| XXbac-B33L19.12 | CLIP3    | 0.353786142 | 2.17E-14    |
| XXbac-B33L19.12 | ULBP2    | 0.331811424 | 9.64E-13    |
| XXbac-B33L19.12 | ETHE1    | 0.25653727  | 5.00E-08    |
| XXbac-B33L19.12 | XPR1     | 0.27732905  | 3.41E-09    |
| XXbac-B33L19.12 | SPTBN2   | 0.296688763 | 2.27E-10    |
| XXbac-B33L19.12 | IVL      | 0.286726032 | 9.39E-10    |
| XXbac-B33L19.12 | MARCO    | 0.130285148 | 0.00626357  |
| XXbac-B33L19.12 | PLXND1   | 0.489679532 | 7.46E-28    |
| XXbac-B33L19.12 | EMILIN2  | 0.332777154 | 8.21E-13    |
| XXbac-B33L19.12 | PLAUR    | 0.209810244 | 9.30E-06    |
| XXbac-B33L19.12 | CDC42EP5 | 0.364647659 | 2.98E-15    |
| XXbac-B33L19.12 | TRPC5    | 0.531143867 | 2.52E-33    |
| XXbac-B33L19.12 | TMEM100  | 0.327132167 | 2.08E-12    |
| XXbac-B33L19.12 | QSOX1    | 0.33917265  | 2.80E-13    |
| XXbac-B33L19.12 | ARHGAP23 | 0.492372566 | 3.47E-28    |
| XXbac-B33L19.12 | MDFI     | 0.384987574 | 5.86E-17    |
| XXbac-B33L19.12 | FSTL3    | 0.338970481 | 2.90E-13    |
| XXbac-B33L19.12 | INF2     | 0.433322305 | 1.61E-21    |
| XXbac-B33L19.12 | TGFBR1   | 0.456319785 | 5.79E-24    |
| XXbac-B33L19.12 | TGFBI    | 0.252316405 | 8.39E-08    |
| XXbac-B33L19.12 | ERBB3    | 0.263372146 | 2.12E-08    |
| XXbac-B33L19.12 | CCL18    | 0.185129866 | 9.56E-05    |
| XXbac-B33L19.12 | CCL17    | 0.214176253 | 5.97E-06    |
| XXbac-B33L19.12 | C16orf45 | 0.440069645 | 3.22E-22    |
| XXbac-B33L19.12 | PRDM1    | 0.434647257 | 1.17E-21    |

|                 |           |             |             |
|-----------------|-----------|-------------|-------------|
| XXbac-B33L19.12 | TRIM47    | 0.257515201 | 4.43E-08    |
| XXbac-B33L19.12 | CNFN      | 0.212317993 | 7.22E-06    |
| XXbac-B33L19.12 | ARMCX3    | 0.494215923 | 2.04E-28    |
| XXbac-B33L19.12 | RAMP1     | 0.500583753 | 3.21E-29    |
| XXbac-B33L19.12 | GABRD     | 0.394944367 | 7.72E-18    |
| XXbac-B33L19.12 | COL13A1   | 0.445443087 | 8.73E-23    |
| XXbac-B33L19.12 | S100A5    | 0.313192005 | 1.91E-11    |
| XXbac-B33L19.12 | MISP      | 0.17495317  | 0.000229896 |
| XXbac-B33L19.12 | HES6      | 0.394170449 | 9.06E-18    |
| XXbac-B33L19.12 | PSD3      | 0.363281989 | 3.84E-15    |
| XXbac-B33L19.12 | DOK7      | 0.365060226 | 2.76E-15    |
| XXbac-B33L19.12 | ZMAT3     | 0.248895136 | 1.27E-07    |
| XXbac-B33L19.12 | MFAP2     | 0.382301917 | 1.00E-16    |
| XXbac-B33L19.12 | TMEM79    | 0.358243651 | 9.70E-15    |
| XXbac-B33L19.12 | SLC1A5    | 0.261279519 | 2.77E-08    |
| XXbac-B33L19.12 | BBC3      | 0.244583046 | 2.11E-07    |
| XXbac-B33L19.12 | HLA-DQB2  | 0.114006633 | 0.016862604 |
| XXbac-B33L19.12 | C1QL1     | 0.530873792 | 2.75E-33    |
| XXbac-B33L19.12 | TMEM215   | 0.412027654 | 2.03E-19    |
| XXbac-B33L19.12 | PNP       | 0.297122044 | 2.13E-10    |
| XXbac-B33L19.12 | ARNTL     | 0.418253826 | 5.10E-20    |
| XXbac-B33L19.12 | CLDN2     | 0.432855274 | 1.79E-21    |
| XXbac-B33L19.12 | MVP       | 0.241712813 | 2.96E-07    |
| XXbac-B33L19.12 | LGALS1    | 0.249979188 | 1.11E-07    |
| XXbac-B33L19.12 | BIRC7     | 0.409249149 | 3.72E-19    |
| XXbac-B33L19.12 | COL8A1    | 0.35044645  | 3.94E-14    |
| XXbac-B33L19.12 | PERP      | 0.262953479 | 2.24E-08    |
| XXbac-B33L19.12 | GJA4      | 0.441526682 | 2.27E-22    |
| XXbac-B33L19.12 | IGFL2     | 0.301394192 | 1.14E-10    |
| XXbac-B33L19.12 | DAPK2     | 0.43095799  | 2.79E-21    |
| XXbac-B33L19.12 | MAMLD1    | 0.46292355  | 1.06E-24    |
| XXbac-B33L19.12 | ETV5      | 0.426656967 | 7.58E-21    |
| XXbac-B33L19.12 | RUNX1     | 0.253360874 | 7.39E-08    |
| XXbac-B33L19.12 | LONRF2    | 0.467079154 | 3.58E-25    |
| XXbac-B33L19.12 | SPOCK1    | 0.402091505 | 1.73E-18    |
| XXbac-B33L19.12 | XKRX      | 0.379110766 | 1.87E-16    |
| XXbac-B33L19.12 | TGFB1     | 0.40557761  | 8.21E-19    |
| XXbac-B33L19.12 | ERP27     | 0.328624956 | 1.63E-12    |
| XXbac-B33L19.12 | TNFRSF10C | 0.19596159  | 3.56E-05    |
| XXbac-B33L19.12 | PALM      | 0.422041836 | 2.17E-20    |
| XXbac-B33L19.12 | TSC22D1   | 0.538865501 | 1.98E-34    |
| XXbac-B33L19.12 | TGM2      | 0.204631736 | 1.55E-05    |
| XXbac-B33L19.12 | UBE2QL1   | 0.484096401 | 3.58E-27    |
| XXbac-B33L19.12 | ECE1      | 0.47678696  | 2.67E-26    |
| XXbac-B33L19.12 | COL8A2    | 0.353478561 | 2.30E-14    |
| XXbac-B33L19.12 | HIST3H2A  | 0.176005726 | 0.000210403 |
| XXbac-B33L19.12 | TNFRSF21  | 0.292605231 | 4.09E-10    |
| XXbac-B33L19.12 | SOX4      | 0.275638775 | 4.28E-09    |
| XXbac-B33L19.12 | ELF3      | 0.207939223 | 1.12E-05    |
| XXbac-B33L19.12 | TPD52L1   | 0.388361173 | 2.97E-17    |
| XXbac-B33L19.12 | INHBB     | 0.527428121 | 8.38E-33    |



|                 |            |             |             |
|-----------------|------------|-------------|-------------|
| XXbac-B33L19.12 | HPN        | 0.328239628 | 1.74E-12    |
| XXbac-B33L19.12 | MMP7       | 0.178156308 | 0.000175285 |
| XXbac-B33L19.12 | RAB27A     | 0.453214042 | 1.27E-23    |
| XXbac-B33L19.12 | IGF2BP2    | 0.453837858 | 1.08E-23    |
| XXbac-B33L19.12 | ITGB4      | 0.300260134 | 1.35E-10    |
| XXbac-B33L19.12 | PPP1R1B    | 0.437253182 | 6.32E-22    |
| XXbac-B33L19.12 | NPDC1      | 0.404871934 | 9.56E-19    |
| XXbac-B33L19.12 | CCL13      | 0.207223617 | 1.20E-05    |
| XXbac-B33L19.12 | SPINT1     | 0.26956604  | 9.55E-09    |
| XXbac-B33L19.12 | HEY2       | 0.523395947 | 3.03E-32    |
| XXbac-B33L19.12 | CST2       | 0.207043806 | 1.22E-05    |
| XXbac-B33L19.12 | ADM        | 0.266760784 | 1.37E-08    |
| XXbac-B33L19.12 | VSTM2L     | 0.142194256 | 0.002826594 |
| XXbac-B33L19.12 | FAM84A     | 0.295757367 | 2.60E-10    |
| XXbac-B33L19.12 | P4HA2      | 0.304449078 | 7.22E-11    |
| XXbac-B33L19.12 | LPL        | 0.397986409 | 4.10E-18    |
| XXbac-B33L19.12 | TMEM173    | 0.345122238 | 1.00E-13    |
| XXbac-B33L19.12 | DHRS3      | 0.415180997 | 1.01E-19    |
| XXbac-B33L19.12 | SCN1B      | 0.301837337 | 1.07E-10    |
| XXbac-B33L19.12 | GLT1D1     | 0.440682821 | 2.78E-22    |
| XXbac-B33L19.12 | PHYHIP     | 0.406939166 | 6.13E-19    |
| XXbac-B33L19.12 | BHLHE40    | 0.311821227 | 2.36E-11    |
| XXbac-B33L19.12 | BID        | 0.471389399 | 1.14E-25    |
| XXbac-B33L19.12 | POSTN      | 0.053404423 | 0.26418524  |
| XXbac-B33L19.12 | ITGA3      | 0.296581933 | 2.30E-10    |
| XXbac-B33L19.12 | RSPO4      | 0.362399965 | 4.52E-15    |
| XXbac-B33L19.12 | ADAMTS9    | 0.530535708 | 3.07E-33    |
| XXbac-B33L19.12 | ABTB2      | 0.347644032 | 6.46E-14    |
| XXbac-B33L19.12 | KCNQ3      | 0.329877411 | 1.33E-12    |
| XXbac-B33L19.12 | ANXA1      | 0.476470583 | 2.91E-26    |
| XXbac-B33L19.12 | S100A11    | 0.255546854 | 5.65E-08    |
| XXbac-B33L19.12 | CEACAM6    | 0.199354339 | 2.58E-05    |
| XXbac-B33L19.12 | IER5L      | 0.341588748 | 1.85E-13    |
| XXbac-B33L19.12 | KRT80      | 0.237675957 | 4.70E-07    |
| XXbac-B33L19.12 | CDH6       | 0.295208744 | 2.81E-10    |
| XXbac-B33L19.12 | UNC5B      | 0.261598591 | 2.66E-08    |
| XXbac-B33L19.12 | PLEKHN1    | 0.360403243 | 6.53E-15    |
| XXbac-B33L19.12 | SYTL1      | 0.302410078 | 9.78E-11    |
| XXbac-B33L19.12 | TMEM163    | 0.321750922 | 4.96E-12    |
| XXbac-B33L19.12 | C4orf48    | 0.272387612 | 6.59E-09    |
| XXbac-B33L19.12 | B3GNT7     | 0.451972511 | 1.73E-23    |
| XXbac-B33L19.12 | BAIAP3     | 0.478957334 | 1.48E-26    |
| XXbac-B33L19.12 | PHLDA2     | 0.313694093 | 1.76E-11    |
| XXbac-B33L19.12 | GAP43      | 0.330190225 | 1.26E-12    |
| XXbac-B33L19.12 | S100A1     | 0.200699724 | 2.27E-05    |
| XXbac-B33L19.12 | PTPRE      | 0.383891321 | 7.29E-17    |
| XXbac-B33L19.12 | CCND1      | 0.363423295 | 3.74E-15    |
| XXbac-B33L19.12 | ST6GALNAC5 | 0.218988451 | 3.63E-06    |
| XXbac-B33L19.12 | KRT17      | 0.316328676 | 1.17E-11    |
| XXbac-B33L19.12 | HPCAL4     | 0.467884    | 2.90E-25    |
| XXbac-B33L19.12 | GABBR2     | 0.378581721 | 2.08E-16    |

|                 |         |             |             |
|-----------------|---------|-------------|-------------|
| XXbac-B33L19.12 | DIRAS3  | 0.443048696 | 1.57E-22    |
| XXbac-B33L19.12 | SERINC2 | 0.246820243 | 1.62E-07    |
| XXbac-B33L19.12 | PTCHD4  | 0.324400118 | 3.24E-12    |
| XXbac-B33L19.12 | EPS8    | 0.461084308 | 1.71E-24    |
| XXbac-B33L19.12 | LY6E    | 0.365001916 | 2.79E-15    |
| XXbac-B33L19.12 | UPP1    | 0.287276054 | 8.70E-10    |
| XXbac-B33L19.12 | AHNAK2  | 0.256621543 | 4.95E-08    |
| XXbac-B33L19.12 | PLXNC1  | 0.442762822 | 1.68E-22    |
| XXbac-B33L19.12 | TNC     | 0.185479157 | 9.26E-05    |
| XXbac-B33L19.12 | DUSP4   | 0.403750569 | 1.21E-18    |
| XXbac-B33L19.12 | NRCAM   | 0.385065604 | 5.76E-17    |
| XXbac-B33L19.12 | NRP2    | 0.501850679 | 2.21E-29    |
| XXbac-B33L19.12 | CTSC    | 0.312060283 | 2.27E-11    |
| XXbac-B33L19.12 | AMIGO2  | 0.486796813 | 1.68E-27    |
| XXbac-B33L19.12 | NAB2    | 0.464619643 | 6.83E-25    |
| XXbac-B33L19.12 | TBC1D2  | 0.299745702 | 1.45E-10    |
| XXbac-B33L19.12 | PHLDA3  | 0.219151734 | 3.57E-06    |
| XXbac-B33L19.12 | PTP4A3  | 0.315166452 | 1.40E-11    |
| XXbac-B33L19.12 | CRABP2  | 0.291455776 | 4.82E-10    |
| XXbac-B33L19.12 | GOS2    | 0.320867621 | 5.71E-12    |
| XXbac-B33L19.12 | S100A6  | 0.234944191 | 6.41E-07    |
| XXbac-B33L19.12 | FOXQ1   | 0.351693089 | 3.16E-14    |
| XXbac-B33L19.12 | LRG1    | 0.3926988   | 1.23E-17    |
| XXbac-B33L19.12 | LAMP5   | 0.318783931 | 7.95E-12    |
| XXbac-B33L19.12 | ALDH3B1 | 0.27673446  | 3.70E-09    |
| XXbac-B33L19.12 | CDH2    | 0.39295786  | 1.16E-17    |
| XXbac-B33L19.12 | SCG5    | 0.376804903 | 2.94E-16    |
| XXbac-B33L19.12 | ZCCHC16 | 0.528564926 | 5.82E-33    |
| XXbac-B33L19.12 | GRB7    | 0.383153013 | 8.44E-17    |
| XXbac-B33L19.12 | TIAM1   | 0.377543494 | 2.55E-16    |
| XXbac-B33L19.12 | FXYD5   | 0.321441214 | 5.21E-12    |
| XXbac-B33L19.12 | CLDN9   | 0.3763729   | 3.20E-16    |
| XXbac-B33L19.12 | FAM43A  | 0.426949651 | 7.08E-21    |
| XXbac-B33L19.12 | CHST2   | 0.421198968 | 2.63E-20    |
| XXbac-B33L19.12 | HMGA2   | 0.449792915 | 2.99E-23    |
| XXbac-B33L19.12 | GALNT7  | 0.386307702 | 4.49E-17    |
| XXbac-B33L19.12 | CBLN1   | 0.28721519  | 8.77E-10    |
| XXbac-B33L19.12 | STRA6   | 0.3888434   | 2.69E-17    |
| XXbac-B33L19.12 | MUC21   | 0.249442326 | 1.19E-07    |
| XXbac-B33L19.12 | PRR36   | 0.390649444 | 1.87E-17    |
| XXbac-B33L19.12 | NFE2L3  | 0.172110317 | 0.000291318 |
| XXbac-B33L19.12 | NR1D1   | 0.171532185 | 0.000305552 |
| XXbac-B33L19.12 | MUC1    | 0.089456069 | 0.061106374 |
| XXbac-B33L19.12 | NAT8L   | 0.503168822 | 1.50E-29    |
| XXbac-B33L19.12 | APOC1   | 0.405249316 | 8.81E-19    |
| XXbac-B33L19.12 | EVA1A   | 0.314611587 | 1.53E-11    |
| XXbac-B33L19.12 | ENTPD1  | 0.447300064 | 5.53E-23    |
| XXbac-B33L19.12 | COL1A1  | 0.193223866 | 4.59E-05    |
| XXbac-B33L19.12 | FNDC4   | 0.264134005 | 1.93E-08    |
| XXbac-B33L19.12 | FRMD3   | 0.479731393 | 1.20E-26    |
| XXbac-B33L19.12 | SHROOM4 | 0.458575567 | 3.26E-24    |

|                 |           |             |             |
|-----------------|-----------|-------------|-------------|
| XXbac-B33L19.12 | NELL2     | 0.470516738 | 1.44E-25    |
| XXbac-B33L19.12 | EPHB3     | 0.310215366 | 3.01E-11    |
| XXbac-B33L19.12 | TMC6      | 0.345859694 | 8.83E-14    |
| XXbac-B33L19.12 | NOD1      | 0.521192658 | 6.08E-32    |
| XXbac-B33L19.12 | GGCT      | 0.43477778  | 1.14E-21    |
| XXbac-B33L19.12 | ICAM1     | 0.304478587 | 7.19E-11    |
| XXbac-B33L19.12 | PRSS23    | 0.404416947 | 1.05E-18    |
| XXbac-B33L19.12 | CFI       | 0.329516486 | 1.41E-12    |
| XXbac-B33L19.12 | CD55      | 0.284339849 | 1.31E-09    |
| XXbac-B33L19.12 | RASD2     | 0.513223791 | 7.22E-31    |
| XXbac-B33L19.12 | KLK11     | 0.448005872 | 4.65E-23    |
| XXbac-B33L19.12 | ICAM5     | 0.531524422 | 2.23E-33    |
| XXbac-B33L19.12 | ADORA1    | 0.289201129 | 6.63E-10    |
| XXbac-B33L19.12 | ITGA2     | 0.282326103 | 1.73E-09    |
| XXbac-B33L19.12 | ABCC3     | 0.39344335  | 1.05E-17    |
| XXbac-B33L19.12 | MFGE8     | 0.386486462 | 4.34E-17    |
| XXbac-B33L19.12 | STK32A    | 0.345064212 | 1.01E-13    |
| XXbac-B33L19.12 | CYSLTR2   | 0.483194372 | 4.60E-27    |
| XXbac-B33L19.12 | LAD1      | 0.369585835 | 1.18E-15    |
| XXbac-B33L19.12 | MGAT3     | 0.296724232 | 2.26E-10    |
| XXbac-B33L19.12 | IGFBP6    | 0.423644434 | 1.51E-20    |
| XXbac-B33L19.12 | CYP2S1    | 0.240908534 | 3.24E-07    |
| XXbac-B33L19.12 | KCNJ2     | 0.371448912 | 8.26E-16    |
| XXbac-B33L19.12 | FAM20A    | 0.283002128 | 1.58E-09    |
| XXbac-B33L19.12 | TGFA      | 0.485970828 | 2.12E-27    |
| XXbac-B33L19.12 | MXRA8     | 0.429333828 | 4.08E-21    |
| XXbac-B33L19.12 | C8orf4    | 0.305652871 | 6.02E-11    |
| XXbac-B33L19.12 | CLDN10    | 0.354250433 | 2.00E-14    |
| XXbac-B33L19.12 | PDE5A     | 0.453362441 | 1.22E-23    |
| XXbac-B33L19.12 | APOE      | 0.489891916 | 7.03E-28    |
| XXbac-B33L19.12 | SPOCK2    | 0.302185067 | 1.01E-10    |
| XXbac-B33L19.12 | TENM1     | 0.491941839 | 3.92E-28    |
| XXbac-B33L19.12 | SLIT1     | 0.346227855 | 8.28E-14    |
| XXbac-B33L19.12 | CXCL14    | 0.366978492 | 1.93E-15    |
| XXbac-B33L19.12 | ECM1      | 0.349704454 | 4.50E-14    |
| XXbac-B33L19.12 | DUSP5     | 0.369988754 | 1.09E-15    |
| XXbac-B33L19.12 | SEZ6L2    | 0.262983556 | 2.23E-08    |
| XXbac-B33L19.12 | THRSP     | 0.322069427 | 4.71E-12    |
| XXbac-B33L19.12 | C19orf33  | 0.223099635 | 2.35E-06    |
| XXbac-B33L19.12 | MPZL2     | 0.427146996 | 6.77E-21    |
| XXbac-B33L19.12 | CTSH      | 0.4156584   | 9.10E-20    |
| XXbac-B33L19.12 | CYP1B1    | 0.350560374 | 3.86E-14    |
| XXbac-B33L19.12 | ALOX5     | 0.130979333 | 0.005989666 |
| XXbac-B33L19.12 | SYTL5     | 0.377143568 | 2.75E-16    |
| XXbac-B33L19.12 | TNFRSF12A | 0.452800198 | 1.41E-23    |
| XXbac-B33L19.12 | DUSP6     | 0.499869422 | 3.95E-29    |
| XXbac-B33L19.12 | ALOX15B   | 0.240697285 | 3.33E-07    |
| XXbac-B33L19.12 | SDC4      | 0.491274752 | 4.74E-28    |
| XXbac-B33L19.12 | MDK       | 0.45222391  | 1.63E-23    |
| XXbac-B33L19.12 | KRT19     | 0.241665711 | 2.97E-07    |
| XXbac-B33L19.12 | MET       | 0.340181935 | 2.35E-13    |

|                 |          |             |             |
|-----------------|----------|-------------|-------------|
| XXbac-B33L19.12 | TESC     | 0.552784383 | 1.71E-36    |
| XXbac-B33L19.12 | CXCL17   | 0.241161999 | 3.15E-07    |
| XXbac-B33L19.12 | NPC2     | 0.433603355 | 1.50E-21    |
| XXbac-B33L19.12 | COMP     | 0.339826543 | 2.50E-13    |
| XXbac-B33L19.12 | TUSC3    | 0.461760333 | 1.44E-24    |
| XXbac-B33L19.12 | TMPRSS4  | 0.297608668 | 1.98E-10    |
| XXbac-B33L19.12 | LGALS3   | 0.339580393 | 2.61E-13    |
| XXbac-B33L19.12 | CRLF1    | 0.294505337 | 3.11E-10    |
| XXbac-B33L19.12 | CTXN1    | 0.389772952 | 2.23E-17    |
| XXbac-B33L19.12 | PCSK1N   | 0.274637718 | 4.89E-09    |
| XXbac-B33L19.12 | NMU      | 0.22107982  | 2.91E-06    |
| XXbac-B33L19.12 | GALE     | 0.450956558 | 2.23E-23    |
| XXbac-B33L19.12 | PCSK2    | 0.248772416 | 1.29E-07    |
| XXbac-B33L19.12 | GJB3     | 0.480222132 | 1.05E-26    |
| XXbac-B33L19.12 | SLPI     | 0.181429107 | 0.000132217 |
| XXbac-B33L19.12 | AGR2     | 0.323026503 | 4.04E-12    |
| XXbac-B33L19.12 | MRC2     | 0.382838622 | 8.99E-17    |
| XXbac-B33L19.12 | GOLT1A   | 0.444452388 | 1.11E-22    |
| XXbac-B33L19.12 | SLC27A6  | 0.360492139 | 6.43E-15    |
| XXbac-B33L19.12 | KCNN4    | 0.245673483 | 1.86E-07    |
| XXbac-B33L19.12 | ETV4     | 0.427143819 | 6.77E-21    |
| XXbac-B33L19.12 | SYT12    | 0.434860492 | 1.12E-21    |
| XXbac-B33L19.12 | PVRL4    | 0.315779344 | 1.27E-11    |
| XXbac-B33L19.12 | PLCD3    | 0.405655215 | 8.08E-19    |
| XXbac-B33L19.12 | PLAU     | 0.284442849 | 1.29E-09    |
| XXbac-B33L19.12 | LRRK2    | 0.452736923 | 1.43E-23    |
| XXbac-B33L19.12 | SFN      | 0.213490715 | 6.41E-06    |
| XXbac-B33L19.12 | LPAR5    | 0.420966864 | 2.77E-20    |
| XXbac-B33L19.12 | NGEF     | 0.298605894 | 1.72E-10    |
| XXbac-B33L19.12 | DTX4     | 0.388530995 | 2.87E-17    |
| XXbac-B33L19.12 | CST6     | 0.400149973 | 2.60E-18    |
| XXbac-B33L19.12 | QPCT     | 0.457436042 | 4.36E-24    |
| XXbac-B33L19.12 | TIMP1    | 0.404852923 | 9.59E-19    |
| XXbac-B33L19.12 | CAMK2N1  | 0.424371534 | 1.28E-20    |
| XXbac-B33L19.12 | KLHDC8A  | 0.385716517 | 5.06E-17    |
| XXbac-B33L19.12 | PDLIM4   | 0.358481147 | 9.29E-15    |
| XXbac-B33L19.12 | SCEL     | 0.369903347 | 1.11E-15    |
| XXbac-B33L19.12 | LCN2     | 0.152878857 | 0.00131383  |
| XXbac-B33L19.12 | PROS1    | 0.326482389 | 2.31E-12    |
| XXbac-B33L19.12 | GABRB2   | 0.389288881 | 2.46E-17    |
| XXbac-B33L19.12 | TMPRSS6  | 0.327516643 | 1.95E-12    |
| XXbac-B33L19.12 | KLK7     | 0.349709263 | 4.49E-14    |
| XXbac-B33L19.12 | PDZK1IP1 | 0.205626408 | 1.41E-05    |
| XXbac-B33L19.12 | CDH3     | 0.440325301 | 3.03E-22    |
| XXbac-B33L19.12 | LRP4     | 0.490007258 | 6.80E-28    |
| XXbac-B33L19.12 | IGSF1    | 0.368906121 | 1.34E-15    |
| XXbac-B33L19.12 | B3GNT3   | 0.185647703 | 9.13E-05    |
| XXbac-B33L19.12 | CLDN1    | 0.349015802 | 5.08E-14    |
| XXbac-B33L19.12 | GDF15    | 0.260058843 | 3.23E-08    |
| XXbac-B33L19.12 | ARHGAP36 | 0.379091382 | 1.88E-16    |
| XXbac-B33L19.12 | LAMB3    | 0.302213158 | 1.01E-10    |

|                 |           |              |             |
|-----------------|-----------|--------------|-------------|
| XXbac-B33L19.12 | KLK10     | 0.381742511  | 1.12E-16    |
| XXbac-B33L19.12 | DPP4      | 0.29333077   | 3.69E-10    |
| XXbac-B33L19.12 | METTL7B   | 0.460755021  | 1.86E-24    |
| XXbac-B33L19.12 | LIPH      | 0.35641434   | 1.35E-14    |
| XXbac-B33L19.12 | CLDN16    | 0.35662715   | 1.30E-14    |
| XXbac-B33L19.12 | CHI3L1    | 0.273400301  | 5.77E-09    |
| XXbac-B33L19.12 | SLC22A31  | 0.366058362  | 2.29E-15    |
| XXbac-B33L19.12 | TACSTD2   | 0.411260052  | 2.40E-19    |
| XXbac-B33L19.12 | SFTPB     | 0.253261279  | 7.48E-08    |
| XXbac-B33L19.12 | RXRG      | 0.490201341  | 6.44E-28    |
| XXbac-B33L19.12 | DCSTAMP   | 0.359246147  | 8.08E-15    |
| XXbac-B33L19.12 | CITED1    | 0.392567283  | 1.26E-17    |
| XXbac-B33L19.12 | SERPINA1  | 0.32790949   | 1.83E-12    |
| XXbac-B33L19.12 | PRR15     | 0.531048438  | 2.60E-33    |
| XXbac-B33L19.12 | SLC34A2   | 0.262378042  | 2.41E-08    |
| XXbac-B33L19.12 | FN1       | 0.19885807   | 2.71E-05    |
| XXbac-B33L19.12 | ZCCHC12   | 0.454918505  | 8.26E-24    |
| RP11-861E21.1   | TFF3      | -0.271807551 | 7.12E-09    |
| RP11-861E21.1   | CCL21     | -0.302290477 | 9.96E-11    |
| RP11-861E21.1   | TPO       | -0.291536613 | 4.76E-10    |
| RP11-861E21.1   | MT1G      | -0.268388806 | 1.11E-08    |
| RP11-861E21.1   | DIO1      | -0.222441278 | 2.52E-06    |
| RP11-861E21.1   | DPT       | -0.329151012 | 1.50E-12    |
| RP11-861E21.1   | CDH16     | -0.314882861 | 1.47E-11    |
| RP11-861E21.1   | CRABP1    | -0.255884936 | 5.42E-08    |
| RP11-861E21.1   | SLC26A7   | -0.230038915 | 1.11E-06    |
| RP11-861E21.1   | MT1H      | -0.290437073 | 5.57E-10    |
| RP11-861E21.1   | SLC26A4   | -0.212804621 | 6.87E-06    |
| RP11-861E21.1   | SLC5A8    | -0.330822814 | 1.14E-12    |
| RP11-861E21.1   | PKHD1L1   | -0.324193603 | 3.35E-12    |
| RP11-861E21.1   | TFCP2L1   | -0.37237259  | 6.92E-16    |
| RP11-861E21.1   | WSCD2     | -0.300829804 | 1.24E-10    |
| RP11-861E21.1   | IPCEF1    | -0.363169127 | 3.92E-15    |
| RP11-861E21.1   | SLC5A5    | -0.305328639 | 6.33E-11    |
| RP11-861E21.1   | MT1F      | -0.263795018 | 2.01E-08    |
| RP11-861E21.1   | FOSB      | -0.188696524 | 6.95E-05    |
| RP11-861E21.1   | SEMA3D    | -0.364573546 | 3.02E-15    |
| RP11-861E21.1   | BMP8A     | -0.179108519 | 0.000161561 |
| RP11-861E21.1   | MATN2     | -0.316625993 | 1.12E-11    |
| RP11-861E21.1   | PLA2R1    | -0.357918597 | 1.03E-14    |
| RP11-861E21.1   | COL23A1   | -0.228381884 | 1.33E-06    |
| RP11-861E21.1   | HGD       | -0.301779941 | 1.07E-10    |
| RP11-861E21.1   | TCEAL2    | -0.231864743 | 9.05E-07    |
| RP11-861E21.1   | CHRD1     | -0.312358814 | 2.17E-11    |
| RP11-861E21.1   | TNFRSF11B | -0.354526661 | 1.90E-14    |
| RP11-861E21.1   | FAM167A   | -0.276809285 | 3.66E-09    |
| RP11-861E21.1   | KIT       | -0.311354186 | 2.53E-11    |
| RP11-861E21.1   | SLC4A4    | -0.340591536 | 2.20E-13    |
| RP11-861E21.1   | SMOC2     | -0.282027333 | 1.80E-09    |
| RP11-861E21.1   | FHL1      | -0.259576835 | 3.43E-08    |
| RP11-861E21.1   | OTOS      | -0.247209663 | 1.55E-07    |

|               |            |              |             |
|---------------|------------|--------------|-------------|
| RP11-861E21.1 | IGFBPL1    | -0.369783974 | 1.13E-15    |
| RP11-861E21.1 | HBB        | -0.303403781 | 8.44E-11    |
| RP11-861E21.1 | BEX1       | -0.147225337 | 0.001982856 |
| RP11-861E21.1 | FABP4      | -0.311331819 | 2.54E-11    |
| RP11-861E21.1 | LMOD1      | -0.215453858 | 5.24E-06    |
| RP11-861E21.1 | SOD3       | -0.291785976 | 4.60E-10    |
| RP11-861E21.1 | TMEM171    | -0.337124847 | 3.96E-13    |
| RP11-861E21.1 | PI16       | -0.272203866 | 6.76E-09    |
| RP11-861E21.1 | ZMAT4      | -0.320016062 | 6.54E-12    |
| RP11-861E21.1 | MFAP4      | -0.232008432 | 8.90E-07    |
| RP11-861E21.1 | CWH43      | -0.390975489 | 1.75E-17    |
| RP11-861E21.1 | SPX        | -0.285337283 | 1.14E-09    |
| RP11-861E21.1 | APOD       | -0.214524348 | 5.76E-06    |
| RP11-861E21.1 | DPP6       | -0.32166177  | 5.03E-12    |
| RP11-861E21.1 | MMRN1      | -0.302393704 | 9.81E-11    |
| RP11-861E21.1 | WDR72      | -0.295736356 | 2.61E-10    |
| RP11-861E21.1 | MPPED2     | -0.269038455 | 1.02E-08    |
| RP11-861E21.1 | PAPSS2     | -0.37389799  | 5.16E-16    |
| RP11-861E21.1 | DCN        | -0.281330307 | 1.98E-09    |
| RP11-861E21.1 | SORBS2     | -0.321575528 | 5.10E-12    |
| RP11-861E21.1 | EGR2       | -0.153378426 | 0.001266049 |
| RP11-861E21.1 | EDN3       | -0.092853722 | 0.051876569 |
| RP11-861E21.1 | DIO2       | -0.295802456 | 2.58E-10    |
| RP11-861E21.1 | ITPR1      | -0.258438246 | 3.95E-08    |
| RP11-861E21.1 | CFD        | -0.178795468 | 0.000165958 |
| RP11-861E21.1 | CPXM1      | -0.26248508  | 2.38E-08    |
| RP11-861E21.1 | ELMO1      | -0.28298592  | 1.58E-09    |
| RP11-861E21.1 | GPC3       | -0.288832422 | 6.99E-10    |
| RP11-861E21.1 | MYOC       | -0.149929093 | 0.001631413 |
| RP11-861E21.1 | DEPTOR     | -0.340456074 | 2.25E-13    |
| RP11-861E21.1 | DGKI       | -0.324823634 | 3.03E-12    |
| RP11-861E21.1 | CARTPT     | -0.224347008 | 2.06E-06    |
| RP11-861E21.1 | IYD        | -0.269586402 | 9.53E-09    |
| RP11-861E21.1 | LYVE1      | -0.238009463 | 4.53E-07    |
| RP11-861E21.1 | CLCNKB     | -0.190139512 | 6.09E-05    |
| RP11-861E21.1 | NCAM1      | -0.430456223 | 3.14E-21    |
| RP11-861E21.1 | HBA2       | -0.204989678 | 1.50E-05    |
| RP11-861E21.1 | GLT8D2     | -0.294062303 | 3.32E-10    |
| RP11-861E21.1 | OGDHL      | -0.296526148 | 2.32E-10    |
| RP11-861E21.1 | LIFR       | -0.329854305 | 1.33E-12    |
| RP11-861E21.1 | CSGALNACT1 | -0.283516987 | 1.47E-09    |
| RP11-861E21.1 | RAP1GAP    | -0.301300931 | 1.15E-10    |
| RP11-861E21.1 | COL9A3     | -0.17785844  | 0.000179798 |
| RP11-861E21.1 | FBLN1      | -0.295863733 | 2.56E-10    |
| RP11-861E21.1 | EFEMP1     | -0.349034711 | 5.06E-14    |
| RP11-861E21.1 | AOX1       | -0.405093665 | 9.11E-19    |
| RP11-861E21.1 | GRIN2C     | -0.197224805 | 3.16E-05    |
| RP11-861E21.1 | C11orf74   | -0.285396148 | 1.13E-09    |
| RP11-861E21.1 | PPARGC1A   | -0.3596918   | 7.44E-15    |
| RP11-861E21.1 | ANGPTL1    | -0.298556942 | 1.73E-10    |
| RP11-861E21.1 | SCARA5     | -0.304612583 | 7.04E-11    |

|               |          |              |             |
|---------------|----------|--------------|-------------|
| RP11-861E21.1 | LTF      | -0.326587901 | 2.27E-12    |
| RP11-861E21.1 | CA4      | -0.134675872 | 0.004704276 |
| RP11-861E21.1 | TG       | -0.203396476 | 1.75E-05    |
| RP11-861E21.1 | FCGBP    | -0.285404659 | 1.13E-09    |
| RP11-861E21.1 | PBX4     | -0.044976741 | 0.347137336 |
| RP11-861E21.1 | CYR61    | -0.209923184 | 9.19E-06    |
| RP11-861E21.1 | FOS      | -0.195450751 | 3.73E-05    |
| RP11-861E21.1 | KHDRBS2  | -0.222043262 | 2.63E-06    |
| RP11-861E21.1 | MUM1L1   | -0.301523344 | 1.12E-10    |
| RP11-861E21.1 | RGS16    | -0.238298543 | 4.38E-07    |
| RP11-861E21.1 | MT1M     | -0.304306482 | 7.37E-11    |
| RP11-861E21.1 | LRP2     | -0.313469945 | 1.83E-11    |
| RP11-861E21.1 | MAFB     | -0.366463191 | 2.12E-15    |
| RP11-861E21.1 | KCNK2    | -0.318742602 | 8.00E-12    |
| RP11-861E21.1 | TBC1D4   | -0.27126698  | 7.64E-09    |
| RP11-861E21.1 | MIOX     | -0.160906849 | 0.000714808 |
| RP11-861E21.1 | TPPP     | -0.304234141 | 7.45E-11    |
| RP11-861E21.1 | FMOD     | -0.372544081 | 6.70E-16    |
| RP11-861E21.1 | CITED2   | -0.369255975 | 1.25E-15    |
| RP11-861E21.1 | RGS8     | -0.329848408 | 1.33E-12    |
| RP11-861E21.1 | ABI3BP   | -0.278666744 | 2.85E-09    |
| RP11-861E21.1 | ADH1B    | -0.271138014 | 7.77E-09    |
| RP11-861E21.1 | OGN      | -0.285696961 | 1.08E-09    |
| RP11-861E21.1 | NR4A1    | -0.10064504  | 0.035023137 |
| RP11-861E21.1 | FOXJ1    | -0.201887852 | 2.03E-05    |
| RP11-861E21.1 | ALDH1A1  | -0.251902885 | 8.82E-08    |
| RP11-861E21.1 | OCA2     | -0.249390917 | 1.19E-07    |
| RP11-861E21.1 | TMEM139  | -0.251276356 | 9.52E-08    |
| RP11-861E21.1 | ARHGAP24 | -0.304669747 | 6.98E-11    |
| RP11-861E21.1 | SLC25A15 | -0.339433089 | 2.68E-13    |
| RP11-861E21.1 | DES      | -0.262483033 | 2.38E-08    |
| RP11-861E21.1 | GDF10    | -0.28506925  | 1.18E-09    |
| RP11-861E21.1 | KIAA1324 | -0.262341675 | 2.42E-08    |
| RP11-861E21.1 | JUN      | -0.200359861 | 2.35E-05    |
| RP11-861E21.1 | C7       | -0.222245674 | 2.57E-06    |
| RP11-861E21.1 | LGI3     | -0.224123275 | 2.11E-06    |
| RP11-861E21.1 | CDON     | -0.279838808 | 2.43E-09    |
| RP11-861E21.1 | BCL2     | -0.314612931 | 1.53E-11    |
| RP11-861E21.1 | HLF      | -0.228458196 | 1.32E-06    |
| RP11-861E21.1 | EGR1     | -0.160622444 | 0.000730747 |
| RP11-861E21.1 | IP6K3    | -0.382664287 | 9.30E-17    |
| RP11-861E21.1 | SCUBE3   | -0.219264379 | 3.53E-06    |
| RP11-861E21.1 | PKNOX2   | -0.198084527 | 2.92E-05    |
| RP11-861E21.1 | SMAD9    | -0.261591032 | 2.66E-08    |
| RP11-861E21.1 | IQGAP2   | -0.364141048 | 3.27E-15    |
| RP11-861E21.1 | GNA14    | -0.2712301   | 7.68E-09    |
| RP11-861E21.1 | LAYN     | -0.252241752 | 8.47E-08    |
| RP11-861E21.1 | AVPR1A   | -0.319963178 | 6.59E-12    |
| RP11-861E21.1 | PDLIM3   | -0.320637083 | 5.92E-12    |
| RP11-861E21.1 | GPM6A    | -0.322491988 | 4.41E-12    |
| RP11-861E21.1 | SDPR     | -0.18732687  | 7.86E-05    |

|               |          |              |             |
|---------------|----------|--------------|-------------|
| RP11-861E21.1 | CRYAB    | -0.336620447 | 4.31E-13    |
| RP11-861E21.1 | FOXA2    | -0.186705251 | 8.31E-05    |
| RP11-861E21.1 | C8orf88  | -0.348792156 | 5.28E-14    |
| RP11-861E21.1 | ISM1     | -0.208857504 | 1.02E-05    |
| RP11-861E21.1 | BMP2     | -0.290536749 | 5.49E-10    |
| RP11-861E21.1 | ID4      | -0.210234108 | 8.91E-06    |
| RP11-861E21.1 | NUPR1    | -0.327605212 | 1.93E-12    |
| RP11-861E21.1 | SERTM1   | -0.471605215 | 1.08E-25    |
| RP11-861E21.1 | IRS1     | -0.282634429 | 1.66E-09    |
| RP11-861E21.1 | FIBIN    | -0.41329739  | 1.53E-19    |
| RP11-861E21.1 | PODN     | -0.258884773 | 3.74E-08    |
| RP11-861E21.1 | TDRD9    | -0.291364413 | 4.88E-10    |
| RP11-861E21.1 | EPHA3    | -0.296383736 | 2.37E-10    |
| RP11-861E21.1 | AIF1L    | -0.341898353 | 1.75E-13    |
| RP11-861E21.1 | EBF4     | -0.177797447 | 0.000180735 |
| RP11-861E21.1 | ADM2     | -0.332228788 | 8.99E-13    |
| RP11-861E21.1 | GSTM3    | -0.241563812 | 3.01E-07    |
| RP11-861E21.1 | HSD17B6  | -0.089660147 | 0.060516102 |
| RP11-861E21.1 | AGR3     | -0.203531    | 1.73E-05    |
| RP11-861E21.1 | EPHB1    | -0.392898395 | 1.18E-17    |
| RP11-861E21.1 | TMOD1    | -0.342343179 | 1.63E-13    |
| RP11-861E21.1 | WASF3    | -0.282798401 | 1.62E-09    |
| RP11-861E21.1 | SELV     | -0.196778696 | 3.30E-05    |
| RP11-861E21.1 | ENPP1    | -0.236677681 | 5.27E-07    |
| RP11-861E21.1 | SYNE1    | -0.275297725 | 4.48E-09    |
| RP11-861E21.1 | PLCH1    | -0.309048923 | 3.60E-11    |
| RP11-861E21.1 | CCDC146  | -0.148197542 | 0.001849206 |
| RP11-861E21.1 | SLC16A2  | -0.255087302 | 5.98E-08    |
| RP11-861E21.1 | IER2     | -0.116533226 | 0.014565353 |
| RP11-861E21.1 | KCNAB1   | -0.096264161 | 0.043811337 |
| RP11-861E21.1 | SYNDIG1  | -0.32238759  | 4.48E-12    |
| RP11-861E21.1 | C16orf89 | -0.12972097  | 0.006494397 |
| RP11-861E21.1 | CTGF     | -0.19488862  | 3.94E-05    |
| RP11-861E21.1 | NR4A3    | -0.22271972  | 2.45E-06    |
| RP11-861E21.1 | KIAA1456 | -0.143238787 | 0.002628388 |
| RP11-861E21.1 | AQP4     | -0.199149782 | 2.63E-05    |
| RP11-861E21.1 | RNF150   | -0.3836294   | 7.68E-17    |
| RP11-861E21.1 | C1S      | -0.278072414 | 3.09E-09    |
| RP11-861E21.1 | PFKFB2   | -0.336903853 | 4.11E-13    |
| RP11-861E21.1 | PROX1    | -0.313160723 | 1.92E-11    |
| RP11-861E21.1 | TCF7L1   | -0.175776583 | 0.00021451  |
| RP11-861E21.1 | HSPB6    | -0.202532782 | 1.90E-05    |
| RP11-861E21.1 | FHDC1    | -0.235227885 | 6.21E-07    |
| RP11-861E21.1 | PRR15L   | -0.290223839 | 5.74E-10    |
| RP11-861E21.1 | SLC1A1   | -0.328010321 | 1.80E-12    |
| RP11-861E21.1 | BTBD11   | -0.211328441 | 7.98E-06    |
| RP11-861E21.1 | TRIM58   | -0.310157157 | 3.04E-11    |
| RP11-861E21.1 | LRIG1    | -0.383486704 | 7.90E-17    |
| RP11-861E21.1 | ROR2     | -0.33167843  | 9.85E-13    |
| RP11-861E21.1 | GPR125   | -0.296487283 | 2.34E-10    |
| RP11-861E21.1 | FLRT1    | -0.169651438 | 0.000356475 |



|               |          |              |             |
|---------------|----------|--------------|-------------|
| RP11-861E21.1 | PGF      | -0.194842946 | 3.95E-05    |
| RP11-861E21.1 | DUSP1    | -0.220296016 | 3.16E-06    |
| RP11-861E21.1 | PLA2G7   | -0.334423695 | 6.24E-13    |
| RP11-861E21.1 | PLSCR4   | -0.296472815 | 2.34E-10    |
| RP11-861E21.1 | FAM46B   | -0.330200264 | 1.26E-12    |
| RP11-861E21.1 | GLDC     | -0.244690215 | 2.09E-07    |
| RP11-861E21.1 | ZBTB16   | -0.279037242 | 2.71E-09    |
| RP11-861E21.1 | OMD      | -0.281722241 | 1.88E-09    |
| RP11-861E21.1 | HSD11B2  | -0.096778916 | 0.04269088  |
| RP11-861E21.1 | FGL2     | -0.280570586 | 2.20E-09    |
| RP11-861E21.1 | CLCNKA   | -0.113326401 | 0.017532852 |
| RP11-861E21.1 | GATM     | -0.238522799 | 4.27E-07    |
| RP11-861E21.1 | TNS3     | -0.408234238 | 4.63E-19    |
| RP11-861E21.1 | TOB1     | -0.316161877 | 1.20E-11    |
| RP11-861E21.1 | MARC2    | -0.247451083 | 1.51E-07    |
| RP11-861E21.1 | LRRC2    | -0.270596196 | 8.35E-09    |
| RP11-861E21.1 | SORD     | -0.319177073 | 7.47E-12    |
| RP11-861E21.1 | RIMS4    | -0.226739462 | 1.59E-06    |
| RP11-861E21.1 | SLC29A4  | -0.219102534 | 3.59E-06    |
| RP11-861E21.1 | SLC39A14 | -0.393774713 | 9.83E-18    |
| RP11-861E21.1 | FAXDC2   | -0.194090175 | 4.24E-05    |
| RP11-861E21.1 | HSPB8    | -0.321616096 | 5.07E-12    |
| RP11-861E21.1 | CCL19    | -0.181191932 | 0.000134969 |
| RP11-861E21.1 | KCNIP3   | -0.126208182 | 0.008111108 |
| RP11-861E21.1 | CGNL1    | -0.217652453 | 4.17E-06    |
| RP11-861E21.1 | ATF3     | -0.132949359 | 0.005269961 |
| RP11-861E21.1 | SGCD     | -0.384902457 | 5.96E-17    |
| RP11-861E21.1 | STARD13  | -0.314569101 | 1.54E-11    |
| RP11-861E21.1 | LDHD     | -0.153409916 | 0.001263092 |
| RP11-861E21.1 | RCAN1    | -0.285598419 | 1.10E-09    |
| RP11-861E21.1 | ID3      | -0.167556531 | 0.000422451 |
| RP11-861E21.1 | SYTL3    | -0.311788941 | 2.37E-11    |
| RP11-861E21.1 | MT1E     | -0.22851465  | 1.31E-06    |
| RP11-861E21.1 | CAMK1D   | -0.279462493 | 2.56E-09    |
| RP11-861E21.1 | PRKCQ    | -0.301741359 | 1.08E-10    |
| RP11-861E21.1 | NUAK2    | -0.33193375  | 9.45E-13    |
| RP11-861E21.1 | LIPG     | -0.082993296 | 0.082397336 |
| RP11-861E21.1 | SLC25A25 | -0.376894321 | 2.89E-16    |
| RP11-861E21.1 | PRKX     | -0.369793708 | 1.13E-15    |
| RP11-861E21.1 | SRPX     | -0.23015537  | 1.09E-06    |
| RP11-861E21.1 | FAM189A1 | -0.20679437  | 1.26E-05    |
| RP11-861E21.1 | PLEKHH1  | 0.019688778  | 0.680786998 |
| RP11-861E21.1 | WNT11    | -0.28164577  | 1.90E-09    |
| RP11-861E21.1 | SNAI1    | -0.262332881 | 2.42E-08    |
| RP11-861E21.1 | FDCSP    | -0.175791994 | 0.000214231 |
| RP11-861E21.1 | MT1X     | -0.206402027 | 1.30E-05    |
| RP11-861E21.1 | ACACB    | -0.237153996 | 4.99E-07    |
| RP11-861E21.1 | ARC      | 0.038671311  | 0.418948879 |
| RP11-861E21.1 | KLK4     | -0.393435936 | 1.05E-17    |
| RP11-861E21.1 | ZFPM2    | -0.305150317 | 6.50E-11    |
| RP11-861E21.1 | AKAP12   | -0.290722849 | 5.35E-10    |

|               |          |              |             |
|---------------|----------|--------------|-------------|
| RP11-861E21.1 | GJB6     | -0.329788535 | 1.35E-12    |
| RP11-861E21.1 | ERO1LB   | -0.239487486 | 3.82E-07    |
| RP11-861E21.1 | DNALI1   | -0.118425153 | 0.013029894 |
| RP11-861E21.1 | HKDC1    | -0.346588454 | 7.78E-14    |
| RP11-861E21.1 | ZFP36L2  | -0.316869399 | 1.07E-11    |
| RP11-861E21.1 | CAPSL    | -0.163757419 | 0.000571911 |
| RP11-861E21.1 | CYP7B1   | -0.406997776 | 6.05E-19    |
| RP11-861E21.1 | CPQ      | -0.199501841 | 2.55E-05    |
| RP11-861E21.1 | RPS6KA6  | -0.266733485 | 1.38E-08    |
| RP11-861E21.1 | TLE1     | -0.429997072 | 3.50E-21    |
| RP11-861E21.1 | TP53INP2 | -0.219681403 | 3.37E-06    |
| RP11-861E21.1 | KATNAL2  | -0.172382945 | 0.000284823 |
| RP11-861E21.1 | SGPP2    | -0.43973685  | 3.49E-22    |
| RP11-861E21.1 | CTH      | -0.330829488 | 1.13E-12    |
| RP11-861E21.1 | KIF12    | -0.050375499 | 0.292275289 |
| RP11-861E21.1 | TMEM220  | -0.213231574 | 6.58E-06    |
| RP11-861E21.1 | CENPJ    | -0.136503992 | 0.004165546 |
| RP11-861E21.1 | FAM155B  | 0.001463555  | 0.975606503 |
| RP11-861E21.1 | WFS1     | -0.302264483 | 1.00E-10    |
| RP11-861E21.1 | SELENBP1 | -0.100171703 | 0.035894008 |
| RP11-861E21.1 | SNTA1    | -0.296566574 | 2.31E-10    |
| RP11-861E21.1 | FRAS1    | -0.345442064 | 9.50E-14    |
| RP11-861E21.1 | FBLN7    | -0.24256169  | 2.68E-07    |
| RP11-861E21.1 | AGPAT9   | -0.218378983 | 3.87E-06    |
| RP11-861E21.1 | GPR83    | -0.194197552 | 4.20E-05    |
| RP11-861E21.1 | PRTG     | -0.223272915 | 2.31E-06    |
| RP11-861E21.1 | EGR3     | -0.07572332  | 0.113118273 |
| RP11-861E21.1 | GRAMD2   | -0.190408592 | 5.95E-05    |
| RP11-861E21.1 | HYOU1    | -0.366724327 | 2.02E-15    |
| RP11-861E21.1 | FBLN5    | -0.224222992 | 2.08E-06    |
| RP11-861E21.1 | ITM2A    | -0.223519583 | 2.25E-06    |
| RP11-861E21.1 | SRF      | -0.203348249 | 1.76E-05    |
| RP11-861E21.1 | FGFR2    | -0.274829698 | 4.77E-09    |
| RP11-861E21.1 | MT1A     | -0.27126621  | 7.64E-09    |
| RP11-861E21.1 | MAMDC2   | -0.170636976 | 0.000328879 |
| RP11-861E21.1 | FHL2     | -0.369484487 | 1.20E-15    |
| RP11-861E21.1 | FTCDNL1  | -0.448917334 | 3.71E-23    |
| RP11-861E21.1 | PKIA     | -0.222098865 | 2.61E-06    |
| RP11-861E21.1 | DNAJB4   | -0.211142199 | 8.13E-06    |
| RP11-861E21.1 | SLC25A33 | -0.37505516  | 4.13E-16    |
| RP11-861E21.1 | EYA2     | -0.442455023 | 1.81E-22    |
| RP11-861E21.1 | LPAR1    | -0.512133624 | 1.01E-30    |
| RP11-861E21.1 | STX11    | -0.282760103 | 1.63E-09    |
| RP11-861E21.1 | ARHGEF28 | -0.392120092 | 1.38E-17    |
| RP11-861E21.1 | OR2W3    | -0.215051869 | 5.46E-06    |
| RP11-861E21.1 | ALDH1B1  | -0.512308254 | 9.56E-31    |
| RP11-861E21.1 | CXCL12   | -0.275583462 | 4.31E-09    |
| RP11-861E21.1 | OLFM2    | -0.069173917 | 0.14790927  |
| RP11-861E21.1 | TUB      | -0.187949001 | 7.43E-05    |
| RP11-861E21.1 | HTRA3    | -0.170328605 | 0.000337292 |
| RP11-861E21.1 | CKB      | -0.200770218 | 2.26E-05    |

|               |          |              |             |
|---------------|----------|--------------|-------------|
| RP11-861E21.1 | RGS2     | -0.27491594  | 4.71E-09    |
| RP11-861E21.1 | SHANK2   | -0.261368052 | 2.74E-08    |
| RP11-861E21.1 | CNTFR    | -0.141411344 | 0.002983971 |
| RP11-861E21.1 | CYTH3    | -0.277209288 | 3.47E-09    |
| RP11-861E21.1 | PLAC9    | -0.083273581 | 0.081363515 |
| RP11-861E21.1 | WVOX     | -0.26600184  | 1.52E-08    |
| RP11-861E21.1 | NPR3     | -0.197692893 | 3.03E-05    |
| RP11-861E21.1 | SDC2     | -0.209483181 | 9.61E-06    |
| RP11-861E21.1 | KLF15    | -0.136980165 | 0.004034701 |
| RP11-861E21.1 | TMEM164  | -0.412124333 | 1.99E-19    |
| RP11-861E21.1 | LONRF3   | -0.107861823 | 0.023814418 |
| RP11-861E21.1 | GBP1     | -0.183684577 | 0.000108555 |
| RP11-861E21.1 | ARHGAP6  | -0.289235747 | 6.60E-10    |
| RP11-861E21.1 | TMEM119  | -0.255423617 | 5.74E-08    |
| RP11-861E21.1 | SH3RF1   | -0.408833107 | 4.07E-19    |
| RP11-861E21.1 | CRELD2   | -0.178901993 | 0.000164449 |
| RP11-861E21.1 | PCP4     | -0.197545942 | 3.07E-05    |
| RP11-861E21.1 | GCSH     | -0.184105714 | 0.000104604 |
| RP11-861E21.1 | IMPA2    | -0.273538058 | 5.66E-09    |
| RP11-861E21.1 | C1R      | -0.247048528 | 1.58E-07    |
| RP11-861E21.1 | SUCNR1   | -0.211098511 | 8.17E-06    |
| RP11-861E21.1 | SFRP1    | -0.269612927 | 9.49E-09    |
| RP11-861E21.1 | UGT8     | -0.366947875 | 1.94E-15    |
| RP11-861E21.1 | TLE4     | -0.328749758 | 1.60E-12    |
| RP11-861E21.1 | ANTXR1   | -0.345237381 | 9.84E-14    |
| RP11-861E21.1 | GPX3     | -0.296838349 | 2.22E-10    |
| RP11-861E21.1 | DPY19L2  | 0.025969386  | 0.587364445 |
| RP11-861E21.1 | FAM46C   | -0.359741162 | 7.38E-15    |
| RP11-861E21.1 | IL33     | -0.192541662 | 4.89E-05    |
| RP11-861E21.1 | PEG3     | -0.307458842 | 4.59E-11    |
| RP11-861E21.1 | FAHD2A   | -0.114886691 | 0.016028787 |
| RP11-861E21.1 | PTGDS    | -0.155123118 | 0.001111444 |
| RP11-861E21.1 | CHCHD10  | -0.240294442 | 3.48E-07    |
| RP11-861E21.1 | CD36     | -0.246218735 | 1.74E-07    |
| RP11-861E21.1 | ANKRD37  | -0.068013768 | 0.154843014 |
| RP11-861E21.1 | TSPAN33  | -0.309936305 | 3.15E-11    |
| RP11-861E21.1 | PRDM16   | -0.204167545 | 1.62E-05    |
| RP11-861E21.1 | UST      | -0.126708469 | 0.007860847 |
| RP11-861E21.1 | NEXN     | -0.245534192 | 1.89E-07    |
| RP11-861E21.1 | NUPR1L   | -0.071912187 | 0.132483546 |
| RP11-861E21.1 | SLC24A3  | -0.457540226 | 4.24E-24    |
| RP11-861E21.1 | MARC1    | -0.19079214  | 5.74E-05    |
| RP11-861E21.1 | MYH11    | -0.117217344 | 0.013992697 |
| RP11-861E21.1 | APOA1    | -0.10704856  | 0.024898736 |
| RP11-861E21.1 | TMEM178B | -0.221997446 | 2.64E-06    |
| RP11-861E21.1 | CAPN6    | -0.243772793 | 2.33E-07    |
| RP11-861E21.1 | PPM1L    | -0.349698261 | 4.50E-14    |
| RP11-861E21.1 | FZD8     | -0.264575306 | 1.82E-08    |
| RP11-861E21.1 | RCAN2    | -0.221111624 | 2.90E-06    |
| RP11-861E21.1 | COPZ2    | -0.302452286 | 9.72E-11    |
| RP11-861E21.1 | GAS1     | -0.324993564 | 2.94E-12    |

|               |          |              |             |
|---------------|----------|--------------|-------------|
| RP11-861E21.1 | DACT1    | -0.216968619 | 4.48E-06    |
| RP11-861E21.1 | WBSCR17  | -0.164735945 | 0.000529315 |
| RP11-861E21.1 | NCS1     | -0.330642537 | 1.17E-12    |
| RP11-861E21.1 | SPIRE2   | -0.135092068 | 0.00457638  |
| RP11-861E21.1 | C15orf52 | -0.202623705 | 1.89E-05    |
| RP11-861E21.1 | SPAG5    | -0.178786106 | 0.000166091 |
| RP11-861E21.1 | ARL4D    | -0.285848066 | 1.06E-09    |
| RP11-861E21.1 | FAM189A2 | -0.056602489 | 0.2366025   |
| RP11-861E21.1 | MAP1LC3A | -0.113343986 | 0.017515237 |
| RP11-861E21.1 | KLF6     | -0.159090094 | 0.000822433 |
| RP11-861E21.1 | ADD3     | -0.256916392 | 4.77E-08    |
| RP11-861E21.1 | TSPAN7   | -0.180700444 | 0.000140844 |
| RP11-861E21.1 | KLF9     | -0.236337537 | 5.48E-07    |
| RP11-861E21.1 | KCNQ1    | -0.217764085 | 4.12E-06    |
| RP11-861E21.1 | MAN1A1   | -0.31295519  | 1.98E-11    |
| RP11-861E21.1 | MLF1     | -0.237493715 | 4.80E-07    |
| RP11-861E21.1 | RARB     | -0.249666275 | 1.16E-07    |
| RP11-861E21.1 | CDC42EP2 | -0.178590502 | 0.000168897 |
| RP11-861E21.1 | FAM3B    | -0.20095334  | 2.22E-05    |
| RP11-861E21.1 | GADD45B  | -0.154730917 | 0.0011446   |
| RP11-861E21.1 | TMEM47   | -0.221862551 | 2.68E-06    |
| RP11-861E21.1 | SDF2L1   | -0.131199845 | 0.005904938 |
| RP11-861E21.1 | CCDC85A  | -0.292936622 | 3.90E-10    |
| RP11-861E21.1 | CRYBG3   | -0.357473346 | 1.12E-14    |
| RP11-861E21.1 | FBLN2    | -0.193880812 | 4.32E-05    |
| RP11-861E21.1 | PEBP4    | -0.080477251 | 0.092160282 |
| RP11-861E21.1 | CDADC1   | -0.20789381  | 1.13E-05    |
| RP11-861E21.1 | FAM63A   | -0.26302792  | 2.22E-08    |
| RP11-861E21.1 | GLUL     | -0.289812063 | 6.08E-10    |
| RP11-861E21.1 | FREM2    | -0.245619866 | 1.87E-07    |
| RP11-861E21.1 | ACKR3    | -0.16033535  | 0.00074717  |
| RP11-861E21.1 | DENND6A  | -0.335533206 | 5.18E-13    |
| RP11-861E21.1 | CLDN8    | -0.327383792 | 2.00E-12    |
| RP11-861E21.1 | UTS2R    | -0.170065343 | 0.000344632 |
| RP11-861E21.1 | SCNN1B   | -0.198135875 | 2.90E-05    |
| RP11-861E21.1 | TTC30A   | -0.379268804 | 1.82E-16    |
| RP11-861E21.1 | CORO2B   | -0.169262357 | 0.000367952 |
| RP11-861E21.1 | TC2N     | -0.477688724 | 2.09E-26    |
| RP11-861E21.1 | ALDH2    | -0.316787838 | 1.09E-11    |
| RP11-861E21.1 | GPR183   | -0.238651878 | 4.21E-07    |
| RP11-861E21.1 | C4orf47  | -0.017399118 | 0.716201425 |
| RP11-861E21.1 | SLC25A42 | -0.115203714 | 0.015737396 |
| RP11-861E21.1 | LGMN     | -0.356215749 | 1.40E-14    |
| RP11-861E21.1 | ACSF2    | -0.281641514 | 1.90E-09    |
| RP11-861E21.1 | KIAA1467 | -0.40746019  | 5.48E-19    |
| RP11-861E21.1 | PRKG1    | -0.216678546 | 4.62E-06    |
| RP11-861E21.1 | GNAI1    | -0.272913374 | 6.15E-09    |
| RP11-861E21.1 | ABCC4    | -0.445766534 | 8.07E-23    |
| RP11-861E21.1 | PRPS1    | -0.403690237 | 1.23E-18    |
| RP11-861E21.1 | TSPAN5   | -0.332811203 | 8.16E-13    |
| RP11-861E21.1 | CR2      | -0.150647934 | 0.001548117 |

|               |          |              |             |
|---------------|----------|--------------|-------------|
| RP11-861E21.1 | CCDC170  | -0.311723976 | 2.39E-11    |
| RP11-861E21.1 | RRAD     | -0.120815239 | 0.011295252 |
| RP11-861E21.1 | SCGB2A1  | -0.200242271 | 2.37E-05    |
| RP11-861E21.1 | SESN3    | -0.383782025 | 7.45E-17    |
| RP11-861E21.1 | SGK223   | -0.206443446 | 1.30E-05    |
| RP11-861E21.1 | NDRG2    | -0.263274589 | 2.15E-08    |
| RP11-861E21.1 | C3orf52  | -0.240825084 | 3.28E-07    |
| RP11-861E21.1 | FLRT3    | 0.158893497  | 0.000834937 |
| RP11-861E21.1 | MST1R    | 0.415262368  | 9.94E-20    |
| RP11-861E21.1 | SDC1     | -0.000981708 | 0.983636188 |
| RP11-861E21.1 | ST8SIA4  | 0.107579694  | 0.024185863 |
| RP11-861E21.1 | UBTD1    | 0.418138131  | 5.24E-20    |
| RP11-861E21.1 | EPHA2    | 0.249731523  | 1.15E-07    |
| RP11-861E21.1 | TMEM130  | 0.365745598  | 2.43E-15    |
| RP11-861E21.1 | SPINK2   | 0.227118471  | 1.52E-06    |
| RP11-861E21.1 | MMP16    | 0.230538777  | 1.05E-06    |
| RP11-861E21.1 | SIGLEC15 | 0.311314612  | 2.55E-11    |
| RP11-861E21.1 | RIN1     | 0.386781902  | 4.08E-17    |
| RP11-861E21.1 | IL1RN    | 0.040559833  | 0.396577865 |
| RP11-861E21.1 | FCER1G   | 0.096972676  | 0.042275427 |
| RP11-861E21.1 | CD276    | 0.243240844  | 2.47E-07    |
| RP11-861E21.1 | CTSB     | 0.219920553  | 3.29E-06    |
| RP11-861E21.1 | FAM171A2 | 0.393040949  | 1.14E-17    |
| RP11-861E21.1 | ASPHD1   | 0.33632314   | 4.53E-13    |
| RP11-861E21.1 | C15orf48 | 0.043384674  | 0.364488655 |
| RP11-861E21.1 | DYSF     | 0.274229127  | 5.17E-09    |
| RP11-861E21.1 | PDZRN4   | 0.282698684  | 1.64E-09    |
| RP11-861E21.1 | EFHD2    | 0.318798915  | 7.93E-12    |
| RP11-861E21.1 | ASF1B    | 0.209979497  | 9.14E-06    |
| RP11-861E21.1 | AQP1     | 0.256710859  | 4.90E-08    |
| RP11-861E21.1 | ARRDC2   | 0.500496529  | 3.29E-29    |
| RP11-861E21.1 | PRSS1    | 0.323945564  | 3.49E-12    |
| RP11-861E21.1 | MAPK13   | 0.298598928  | 1.72E-10    |
| RP11-861E21.1 | CST5     | 0.191659516  | 5.30E-05    |
| RP11-861E21.1 | AHR      | 0.089873198  | 0.059904911 |
| RP11-861E21.1 | BAX      | 0.33601633   | 4.77E-13    |
| RP11-861E21.1 | C1orf115 | 0.399032051  | 3.29E-18    |
| RP11-861E21.1 | PLK3     | 0.338769113  | 3.00E-13    |
| RP11-861E21.1 | JAG2     | 0.492170376  | 3.67E-28    |
| RP11-861E21.1 | RAD23B   | 0.217149897  | 4.40E-06    |
| RP11-861E21.1 | CA12     | 0.230837502  | 1.01E-06    |
| RP11-861E21.1 | ADTRP    | 0.338780177  | 2.99E-13    |
| RP11-861E21.1 | UCP2     | 0.372628762  | 6.59E-16    |
| RP11-861E21.1 | IGFBP2   | 0.205775356  | 1.39E-05    |
| RP11-861E21.1 | LOXL2    | 0.270825984  | 8.10E-09    |
| RP11-861E21.1 | GPX1     | 0.309432614  | 3.40E-11    |
| RP11-861E21.1 | P3H3     | 0.421218859  | 2.62E-20    |
| RP11-861E21.1 | C2orf81  | 0.463796153  | 8.47E-25    |
| RP11-861E21.1 | CDT1     | 0.261410747  | 2.72E-08    |
| RP11-861E21.1 | SNX25    | 0.385113664  | 5.71E-17    |
| RP11-861E21.1 | MTHFD1L  | 0.195817704  | 3.61E-05    |

|               |          |             |             |
|---------------|----------|-------------|-------------|
| RP11-861E21.1 | CDC42BPG | 0.322572851 | 4.35E-12    |
| RP11-861E21.1 | MSN      | 0.188857092 | 6.85E-05    |
| RP11-861E21.1 | SIGLEC6  | 0.283166398 | 1.54E-09    |
| RP11-861E21.1 | F2R      | 0.17112705  | 0.000315911 |
| RP11-861E21.1 | TMEM184A | 0.435792002 | 8.95E-22    |
| RP11-861E21.1 | CKS2     | 0.202877182 | 1.84E-05    |
| RP11-861E21.1 | TAX1BP3  | 0.295315928 | 2.77E-10    |
| RP11-861E21.1 | PMEPA1   | 0.199127796 | 2.64E-05    |
| RP11-861E21.1 | CXCL16   | 0.169123349 | 0.000372135 |
| RP11-861E21.1 | FAXC     | 0.312281426 | 2.19E-11    |
| RP11-861E21.1 | VTCN1    | 0.12143394  | 0.010880929 |
| RP11-861E21.1 | SH2D4A   | 0.24001132  | 3.60E-07    |
| RP11-861E21.1 | RNF24    | 0.250643444 | 1.03E-07    |
| RP11-861E21.1 | LY6G6C   | 0.287500945 | 8.43E-10    |
| RP11-861E21.1 | NID1     | 0.199676452 | 2.51E-05    |
| RP11-861E21.1 | STAC     | 0.132564676 | 0.005404056 |
| RP11-861E21.1 | RAB34    | 0.439384366 | 3.80E-22    |
| RP11-861E21.1 | HES4     | 0.444977876 | 9.79E-23    |
| RP11-861E21.1 | EPHA10   | 0.325370021 | 2.77E-12    |
| RP11-861E21.1 | ENTPD2   | 0.370559103 | 9.78E-16    |
| RP11-861E21.1 | DDB2     | 0.35719377  | 1.17E-14    |
| RP11-861E21.1 | NKAIN4   | 0.382971949 | 8.75E-17    |
| RP11-861E21.1 | TRIM29   | 0.179429231 | 0.00015717  |
| RP11-861E21.1 | ADCY8    | 0.287905887 | 7.96E-10    |
| RP11-861E21.1 | SFTA2    | 0.205222729 | 1.47E-05    |
| RP11-861E21.1 | NRIP1    | 0.137020166 | 0.004023881 |
| RP11-861E21.1 | VWA1     | 0.337663858 | 3.61E-13    |
| RP11-861E21.1 | APLNR    | 0.172762521 | 0.000276005 |
| RP11-861E21.1 | REN      | 0.459997731 | 2.26E-24    |
| RP11-861E21.1 | EDIL3    | 0.238087619 | 4.49E-07    |
| RP11-861E21.1 | AGRN     | 0.313921011 | 1.70E-11    |
| RP11-861E21.1 | TREM1    | 0.223265681 | 2.31E-06    |
| RP11-861E21.1 | SRL      | 0.269404415 | 9.76E-09    |
| RP11-861E21.1 | RASGRF1  | 0.404931947 | 9.43E-19    |
| RP11-861E21.1 | RMI2     | 0.244201134 | 2.21E-07    |
| RP11-861E21.1 | SAMD1    | 0.41885544  | 4.46E-20    |
| RP11-861E21.1 | MGAT4B   | 0.334695896 | 5.96E-13    |
| RP11-861E21.1 | NXN      | 0.264326368 | 1.88E-08    |
| RP11-861E21.1 | SH3BGRL3 | 0.261787061 | 2.59E-08    |
| RP11-861E21.1 | CA11     | 0.471189675 | 1.21E-25    |
| RP11-861E21.1 | PLD3     | 0.466435744 | 4.25E-25    |
| RP11-861E21.1 | LURAP1L  | 0.072644152 | 0.128578125 |
| RP11-861E21.1 | CARNS1   | 0.555306382 | 7.04E-37    |
| RP11-861E21.1 | PDLIM7   | 0.453701904 | 1.12E-23    |
| RP11-861E21.1 | BCL2L1   | 0.190317953 | 6.00E-05    |
| RP11-861E21.1 | GGT6     | 0.270082575 | 8.93E-09    |
| RP11-861E21.1 | DPYSL3   | 0.269153633 | 1.01E-08    |
| RP11-861E21.1 | FYN      | 0.269579735 | 9.53E-09    |
| RP11-861E21.1 | TK1      | 0.156135323 | 0.001029922 |
| RP11-861E21.1 | AK1      | 0.374038558 | 5.02E-16    |
| RP11-861E21.1 | HIGD1B   | 0.388022903 | 3.18E-17    |

|               |          |             |             |
|---------------|----------|-------------|-------------|
| RP11-861E21.1 | TMEM59L  | 0.231645734 | 9.27E-07    |
| RP11-861E21.1 | MEGF9    | 0.169930021 | 0.000348463 |
| RP11-861E21.1 | ZFP36L1  | 0.176973896 | 0.000193848 |
| RP11-861E21.1 | ADRA1B   | 0.364439632 | 3.10E-15    |
| RP11-861E21.1 | EPHA4    | 0.180520301 | 0.000143056 |
| RP11-861E21.1 | TCERG1L  | 0.371722799 | 7.83E-16    |
| RP11-861E21.1 | NGFR     | 0.23199907  | 8.91E-07    |
| RP11-861E21.1 | EBI3     | 0.131278143 | 0.005875113 |
| RP11-861E21.1 | S100A10  | 0.089702417 | 0.060394433 |
| RP11-861E21.1 | S100B    | 0.103682506 | 0.029851668 |
| RP11-861E21.1 | CD44     | 0.323311284 | 3.86E-12    |
| RP11-861E21.1 | BHLHE41  | 0.261573443 | 2.67E-08    |
| RP11-861E21.1 | FBX02    | 0.355505532 | 1.59E-14    |
| RP11-861E21.1 | SLC30A2  | 0.066395034 | 0.164924942 |
| RP11-861E21.1 | FRMD5    | 0.139307131 | 0.003447216 |
| RP11-861E21.1 | SAMD11   | 0.30125781  | 1.16E-10    |
| RP11-861E21.1 | SIPA1L2  | 0.33482001  | 5.84E-13    |
| RP11-861E21.1 | S100A16  | 0.266966527 | 1.34E-08    |
| RP11-861E21.1 | PPL      | 0.126700525 | 0.007864766 |
| RP11-861E21.1 | ARHGDIB  | 0.303833997 | 7.91E-11    |
| RP11-861E21.1 | CDC42EP3 | 0.129177137 | 0.006724089 |
| RP11-861E21.1 | RUNX2    | 0.328603091 | 1.64E-12    |
| RP11-861E21.1 | LAMC2    | 0.097177784 | 0.041839363 |
| RP11-861E21.1 | BRINP1   | 0.238913015 | 4.08E-07    |
| RP11-861E21.1 | GPRC5B   | 0.255161771 | 5.93E-08    |
| RP11-861E21.1 | AQP5     | 0.313464696 | 1.83E-11    |
| RP11-861E21.1 | PLAG1    | 0.485988635 | 2.11E-27    |
| RP11-861E21.1 | PTPRU    | 0.128304365 | 0.007107947 |
| RP11-861E21.1 | ANGPTL4  | 0.165926449 | 0.000481467 |
| RP11-861E21.1 | PALM3    | 0.365102898 | 2.74E-15    |
| RP11-861E21.1 | ACP5     | 0.163054942 | 0.000604428 |
| RP11-861E21.1 | DLG4     | 0.587536375 | 4.27E-42    |
| RP11-861E21.1 | ETNK2    | 0.441599841 | 2.23E-22    |
| RP11-861E21.1 | CD109    | 0.272102163 | 6.85E-09    |
| RP11-861E21.1 | SNX22    | 0.401098589 | 2.13E-18    |
| RP11-861E21.1 | TMEM98   | 0.328084364 | 1.78E-12    |
| RP11-861E21.1 | CTHRC1   | 0.129419833 | 0.0066207   |
| RP11-861E21.1 | S100A2   | 0.13513065  | 0.004564685 |
| RP11-861E21.1 | C11orf80 | 0.356340715 | 1.37E-14    |
| RP11-861E21.1 | SREBF1   | 0.444902131 | 9.97E-23    |
| RP11-861E21.1 | PRSS22   | 0.42550527  | 9.87E-21    |
| RP11-861E21.1 | CMTM3    | 0.281550876 | 1.92E-09    |
| RP11-861E21.1 | RDH5     | 0.433236241 | 1.64E-21    |
| RP11-861E21.1 | MYH10    | 0.225204842 | 1.87E-06    |
| RP11-861E21.1 | EVPL     | 0.336237608 | 4.60E-13    |
| RP11-861E21.1 | SCD      | 0.135386254 | 0.00448788  |
| RP11-861E21.1 | CD151    | 0.415248467 | 9.97E-20    |
| RP11-861E21.1 | S100A4   | 0.232737372 | 8.21E-07    |
| RP11-861E21.1 | BNIP1    | 0.469488104 | 1.90E-25    |
| RP11-861E21.1 | MAP3K6   | 0.433390427 | 1.58E-21    |
| RP11-861E21.1 | MANEAL   | 0.28232237  | 1.73E-09    |

|               |          |             |             |
|---------------|----------|-------------|-------------|
| RP11-861E21.1 | CD207    | 0.192974844 | 4.70E-05    |
| RP11-861E21.1 | CD1A     | 0.192454805 | 4.93E-05    |
| RP11-861E21.1 | C3       | 0.049302017 | 0.302693878 |
| RP11-861E21.1 | NT5E     | 0.140525294 | 0.003171661 |
| RP11-861E21.1 | CACNG4   | 0.187487004 | 7.74E-05    |
| RP11-861E21.1 | FHOD1    | 0.579630793 | 9.21E-41    |
| RP11-861E21.1 | LEMD1    | 0.258865908 | 3.75E-08    |
| RP11-861E21.1 | ATP11A   | 0.410895673 | 2.60E-19    |
| RP11-861E21.1 | PPAP2C   | 0.315066551 | 1.42E-11    |
| RP11-861E21.1 | DRAM1    | 0.233859791 | 7.24E-07    |
| RP11-861E21.1 | CDA      | 0.362585861 | 4.37E-15    |
| RP11-861E21.1 | CCND2    | 0.316461879 | 1.15E-11    |
| RP11-861E21.1 | LCN6     | 0.389953    | 2.15E-17    |
| RP11-861E21.1 | CDH4     | 0.251044298 | 9.79E-08    |
| RP11-861E21.1 | MMP11    | 0.244946954 | 2.03E-07    |
| RP11-861E21.1 | B3GAT1   | 0.417905221 | 5.52E-20    |
| RP11-861E21.1 | SPP1     | 0.075121756 | 0.116017942 |
| RP11-861E21.1 | HLA-DQB1 | 0.021470492 | 0.653701559 |
| RP11-861E21.1 | SDC3     | 0.309442969 | 3.39E-11    |
| RP11-861E21.1 | CX3CL1   | 0.146575829 | 0.002077007 |
| RP11-861E21.1 | SDK1     | 0.240387918 | 3.45E-07    |
| RP11-861E21.1 | DOCK9    | 0.235599235 | 5.95E-07    |
| RP11-861E21.1 | CSF2     | 0.3073149   | 4.69E-11    |
| RP11-861E21.1 | GRHL3    | 0.270481018 | 8.47E-09    |
| RP11-861E21.1 | TMEM92   | 0.246889713 | 1.61E-07    |
| RP11-861E21.1 | BASP1    | 0.255208722 | 5.89E-08    |
| RP11-861E21.1 | HRH1     | 0.216040954 | 4.93E-06    |
| RP11-861E21.1 | ESM1     | 0.285854024 | 1.06E-09    |
| RP11-861E21.1 | B4GALNT3 | 0.176162685 | 0.000207632 |
| RP11-861E21.1 | LMO3     | 0.392628748 | 1.24E-17    |
| RP11-861E21.1 | C9orf16  | 0.3253008   | 2.80E-12    |
| RP11-861E21.1 | SEMA3F   | 0.409135945 | 3.81E-19    |
| RP11-861E21.1 | PLA2G12B | 0.490184512 | 6.47E-28    |
| RP11-861E21.1 | KLK6     | 0.330829461 | 1.13E-12    |
| RP11-861E21.1 | ST3GAL5  | 0.489093052 | 8.81E-28    |
| RP11-861E21.1 | FAM132B  | 0.313352497 | 1.86E-11    |
| RP11-861E21.1 | CDKN1A   | 0.091601152 | 0.055133978 |
| RP11-861E21.1 | E2F1     | 0.25359935  | 7.18E-08    |
| RP11-861E21.1 | B3GNT8   | 0.381053497 | 1.28E-16    |
| RP11-861E21.1 | MTMR11   | 0.449307975 | 3.37E-23    |
| RP11-861E21.1 | MYO1G    | 0.199830779 | 2.47E-05    |
| RP11-861E21.1 | TMSB10   | 0.29554444  | 2.68E-10    |
| RP11-861E21.1 | UNC5CL   | 0.354523398 | 1.90E-14    |
| RP11-861E21.1 | ABR      | 0.236101366 | 5.62E-07    |
| RP11-861E21.1 | PLP2     | 0.27928845  | 2.62E-09    |
| RP11-861E21.1 | SRCIN1   | 0.449736063 | 3.03E-23    |
| RP11-861E21.1 | PDE9A    | 0.326777264 | 2.20E-12    |
| RP11-861E21.1 | TREM2    | 0.140259619 | 0.003229993 |
| RP11-861E21.1 | KDELR3   | 0.248722297 | 1.29E-07    |
| RP11-861E21.1 | PC       | 0.294922025 | 2.93E-10    |
| RP11-861E21.1 | C2CD4A   | 0.104977833 | 0.027853835 |



|               |          |             |             |
|---------------|----------|-------------|-------------|
| RP11-861E21.1 | PELI1    | 0.212174262 | 7.32E-06    |
| RP11-861E21.1 | SSX1     | 0.238137123 | 4.46E-07    |
| RP11-861E21.1 | MROH6    | 0.363305724 | 3.82E-15    |
| RP11-861E21.1 | ESPN     | 0.373574584 | 5.49E-16    |
| RP11-861E21.1 | BMP1     | 0.551642955 | 2.54E-36    |
| RP11-861E21.1 | TM4SF4   | 0.315616991 | 1.31E-11    |
| RP11-861E21.1 | CORO2A   | 0.25299197  | 7.73E-08    |
| RP11-861E21.1 | CD164L2  | 0.373525306 | 5.55E-16    |
| RP11-861E21.1 | CTSS     | 0.117444863 | 0.013806686 |
| RP11-861E21.1 | CLU      | 0.244208084 | 2.21E-07    |
| RP11-861E21.1 | TMSB4X   | 0.220187647 | 3.20E-06    |
| RP11-861E21.1 | WNT10A   | 0.274481478 | 5.00E-09    |
| RP11-861E21.1 | NAPSA    | 0.293284142 | 3.71E-10    |
| RP11-861E21.1 | PLEKHA4  | 0.377237302 | 2.70E-16    |
| RP11-861E21.1 | SFTPA1   | 0.271940664 | 7.00E-09    |
| RP11-861E21.1 | C1orf116 | 0.25974946  | 3.35E-08    |
| RP11-861E21.1 | TM4SF1   | 0.163287142 | 0.000593495 |
| RP11-861E21.1 | SEL1L3   | 0.175728072 | 0.000215389 |
| RP11-861E21.1 | VASN     | 0.361879615 | 4.98E-15    |
| RP11-861E21.1 | NPTXR    | 0.190694125 | 5.79E-05    |
| RP11-861E21.1 | PDE4C    | 0.383300603 | 8.20E-17    |
| RP11-861E21.1 | CDC42EP1 | 0.286118139 | 1.02E-09    |
| RP11-861E21.1 | ENDOD1   | 0.163863316 | 0.000567152 |
| RP11-861E21.1 | RYR1     | 0.382312795 | 9.97E-17    |
| RP11-861E21.1 | IL1RAP   | 0.253067006 | 7.66E-08    |
| RP11-861E21.1 | SLC35F2  | 0.329610272 | 1.39E-12    |
| RP11-861E21.1 | ISYNA1   | 0.537569531 | 3.05E-34    |
| RP11-861E21.1 | HLA-G    | 0.094553511 | 0.047714161 |
| RP11-861E21.1 | CDKN2B   | 0.144936812 | 0.002333042 |
| RP11-861E21.1 | ALDH1A3  | 0.165528433 | 0.000496997 |
| RP11-861E21.1 | CLIP3    | 0.357554907 | 1.10E-14    |
| RP11-861E21.1 | ULBP2    | 0.295371247 | 2.75E-10    |
| RP11-861E21.1 | ETHE1    | 0.237151018 | 4.99E-07    |
| RP11-861E21.1 | XPR1     | 0.219686934 | 3.37E-06    |
| RP11-861E21.1 | SPTBN2   | 0.194613157 | 4.04E-05    |
| RP11-861E21.1 | IVL      | 0.209765911 | 9.34E-06    |
| RP11-861E21.1 | MARCO    | 0.117986711 | 0.013372428 |
| RP11-861E21.1 | PLXND1   | 0.360629678 | 6.27E-15    |
| RP11-861E21.1 | EMILIN2  | 0.28518792  | 1.16E-09    |
| RP11-861E21.1 | PLAUR    | 0.171896558 | 0.000296507 |
| RP11-861E21.1 | CDC42EP5 | 0.350129753 | 4.17E-14    |
| RP11-861E21.1 | TRPC5    | 0.402568743 | 1.56E-18    |
| RP11-861E21.1 | TMEM100  | 0.155294608 | 0.001097227 |
| RP11-861E21.1 | QSOX1    | 0.307359977 | 4.66E-11    |
| RP11-861E21.1 | ARHGAP23 | 0.328824227 | 1.58E-12    |
| RP11-861E21.1 | MDF1     | 0.267743837 | 1.21E-08    |
| RP11-861E21.1 | FSTL3    | 0.278493835 | 2.92E-09    |
| RP11-861E21.1 | INF2     | 0.418857426 | 4.46E-20    |
| RP11-861E21.1 | TGFBR1   | 0.224175332 | 2.09E-06    |
| RP11-861E21.1 | TGFBI    | 0.174289623 | 0.00024304  |
| RP11-861E21.1 | ERBB3    | 0.224144126 | 2.10E-06    |

|               |           |             |             |
|---------------|-----------|-------------|-------------|
| RP11-861E21.1 | CCL18     | 0.128326209 | 0.007098105 |
| RP11-861E21.1 | CCL17     | 0.175335806 | 0.000222622 |
| RP11-861E21.1 | C16orf45  | 0.39088434  | 1.78E-17    |
| RP11-861E21.1 | PRDM1     | 0.305039536 | 6.61E-11    |
| RP11-861E21.1 | TRIM47    | 0.31360952  | 1.79E-11    |
| RP11-861E21.1 | CNFN      | 0.378493906 | 2.12E-16    |
| RP11-861E21.1 | ARMCX3    | 0.367967881 | 1.60E-15    |
| RP11-861E21.1 | RAMP1     | 0.331150057 | 1.08E-12    |
| RP11-861E21.1 | GABRD     | 0.423623698 | 1.52E-20    |
| RP11-861E21.1 | COL13A1   | 0.614144347 | 7.26E-47    |
| RP11-861E21.1 | S100A5    | 0.40238498  | 1.62E-18    |
| RP11-861E21.1 | MISP      | 0.123760223 | 0.009441017 |
| RP11-861E21.1 | HES6      | 0.379057739 | 1.89E-16    |
| RP11-861E21.1 | PSD3      | 0.243272333 | 2.47E-07    |
| RP11-861E21.1 | DOK7      | 0.328986639 | 1.54E-12    |
| RP11-861E21.1 | ZMAT3     | 0.134120714 | 0.004879892 |
| RP11-861E21.1 | MFAP2     | 0.313553775 | 1.80E-11    |
| RP11-861E21.1 | TMEM79    | 0.375752186 | 3.61E-16    |
| RP11-861E21.1 | SLC1A5    | 0.212790153 | 6.88E-06    |
| RP11-861E21.1 | BBC3      | 0.390196959 | 2.05E-17    |
| RP11-861E21.1 | HLA-DQB2  | 0.074274233 | 0.120201583 |
| RP11-861E21.1 | C1QL1     | 0.397407927 | 4.63E-18    |
| RP11-861E21.1 | TMEM215   | 0.415134959 | 1.02E-19    |
| RP11-861E21.1 | PNP       | 0.229209123 | 1.21E-06    |
| RP11-861E21.1 | ARNTL     | 0.316833228 | 1.08E-11    |
| RP11-861E21.1 | CLDN2     | 0.292653226 | 4.06E-10    |
| RP11-861E21.1 | MVP       | 0.245785966 | 1.83E-07    |
| RP11-861E21.1 | LGALS1    | 0.252179199 | 8.53E-08    |
| RP11-861E21.1 | BIRC7     | 0.429010561 | 4.40E-21    |
| RP11-861E21.1 | COL8A1    | 0.22938572  | 1.19E-06    |
| RP11-861E21.1 | PERP      | 0.158426402 | 0.000865352 |
| RP11-861E21.1 | GJA4      | 0.438113294 | 5.15E-22    |
| RP11-861E21.1 | IGFL2     | 0.26268942  | 2.31E-08    |
| RP11-861E21.1 | DAPK2     | 0.418861256 | 4.46E-20    |
| RP11-861E21.1 | MAMLD1    | 0.334065679 | 6.62E-13    |
| RP11-861E21.1 | ETV5      | 0.346464481 | 7.95E-14    |
| RP11-861E21.1 | RUNX1     | 0.140211392 | 0.003240686 |
| RP11-861E21.1 | LONRF2    | 0.424247673 | 1.32E-20    |
| RP11-861E21.1 | SPOCK1    | 0.312559017 | 2.10E-11    |
| RP11-861E21.1 | XKRX      | 0.330174448 | 1.26E-12    |
| RP11-861E21.1 | TGFB1     | 0.382009815 | 1.06E-16    |
| RP11-861E21.1 | ERP27     | 0.247691652 | 1.46E-07    |
| RP11-861E21.1 | TNFRSF10C | 0.246566397 | 1.67E-07    |
| RP11-861E21.1 | PALM      | 0.323046318 | 4.03E-12    |
| RP11-861E21.1 | TSC22D1   | 0.359692084 | 7.44E-15    |
| RP11-861E21.1 | TGM2      | 0.076265735 | 0.11055279  |
| RP11-861E21.1 | UBE2QL1   | 0.455152977 | 7.78E-24    |
| RP11-861E21.1 | ECE1      | 0.333632201 | 7.12E-13    |
| RP11-861E21.1 | COL8A2    | 0.245763271 | 1.84E-07    |
| RP11-861E21.1 | HIST3H2A  | 0.250097909 | 1.10E-07    |
| RP11-861E21.1 | TNFRSF21  | 0.148821092 | 0.001767882 |

|               |         |             |             |
|---------------|---------|-------------|-------------|
| RP11-861E21.1 | SOX4    | 0.177887093 | 0.000179359 |
| RP11-861E21.1 | ELF3    | 0.179944128 | 0.000150354 |
| RP11-861E21.1 | TPD52L1 | 0.345174828 | 9.95E-14    |
| RP11-861E21.1 | INHBB   | 0.354317865 | 1.97E-14    |
| RP11-861E21.1 | HPN     | 0.426120167 | 8.57E-21    |
| RP11-861E21.1 | MMP7    | 0.104510378 | 0.028561147 |
| RP11-861E21.1 | RAB27A  | 0.29070753  | 5.36E-10    |
| RP11-861E21.1 | IGF2BP2 | 0.444940713 | 9.88E-23    |
| RP11-861E21.1 | ITGB4   | 0.25831399  | 4.01E-08    |
| RP11-861E21.1 | PPP1R1B | 0.393974572 | 9.43E-18    |
| RP11-861E21.1 | NPDC1   | 0.531566372 | 2.20E-33    |
| RP11-861E21.1 | CCL13   | 0.143654018 | 0.002553176 |
| RP11-861E21.1 | SPINT1  | 0.242179702 | 2.80E-07    |
| RP11-861E21.1 | HEY2    | 0.500660218 | 3.14E-29    |
| RP11-861E21.1 | CST2    | 0.148794686 | 0.001771259 |
| RP11-861E21.1 | ADM     | 0.326245203 | 2.40E-12    |
| RP11-861E21.1 | VSTM2L  | 0.130949205 | 0.006001327 |
| RP11-861E21.1 | FAM84A  | 0.27952221  | 2.54E-09    |
| RP11-861E21.1 | P4HA2   | 0.300787169 | 1.24E-10    |
| RP11-861E21.1 | LPL     | 0.415858683 | 8.71E-20    |
| RP11-861E21.1 | TMEM173 | 0.388721205 | 2.76E-17    |
| RP11-861E21.1 | DHRS3   | 0.444319858 | 1.15E-22    |
| RP11-861E21.1 | SCN1B   | 0.382826274 | 9.01E-17    |
| RP11-861E21.1 | GLT1D1  | 0.410806594 | 2.65E-19    |
| RP11-861E21.1 | PHYHIP  | 0.331880984 | 9.53E-13    |
| RP11-861E21.1 | BHLHE40 | 0.219322251 | 3.50E-06    |
| RP11-861E21.1 | BID     | 0.337576907 | 3.67E-13    |
| RP11-861E21.1 | POSTN   | 0.053769989 | 0.260924919 |
| RP11-861E21.1 | ITGA3   | 0.210053398 | 9.07E-06    |
| RP11-861E21.1 | RSPO4   | 0.346589305 | 7.78E-14    |
| RP11-861E21.1 | ADAMTS9 | 0.4615194   | 1.53E-24    |
| RP11-861E21.1 | ABTB2   | 0.240830474 | 3.27E-07    |
| RP11-861E21.1 | KCNQ3   | 0.249155208 | 1.23E-07    |
| RP11-861E21.1 | ANXA1   | 0.308335869 | 4.02E-11    |
| RP11-861E21.1 | S100A11 | 0.292583854 | 4.10E-10    |
| RP11-861E21.1 | CEACAM6 | 0.138374947 | 0.003672554 |
| RP11-861E21.1 | IER5L   | 0.356120713 | 1.43E-14    |
| RP11-861E21.1 | KRT80   | 0.196000117 | 3.55E-05    |
| RP11-861E21.1 | CDH6    | 0.176735171 | 0.000197813 |
| RP11-861E21.1 | UNC5B   | 0.243162971 | 2.50E-07    |
| RP11-861E21.1 | PLEKHN1 | 0.479623204 | 1.23E-26    |
| RP11-861E21.1 | SYTL1   | 0.509738715 | 2.09E-30    |
| RP11-861E21.1 | TMEM163 | 0.278513693 | 2.91E-09    |
| RP11-861E21.1 | C4orf48 | 0.360833368 | 6.04E-15    |
| RP11-861E21.1 | B3GNT7  | 0.400107945 | 2.63E-18    |
| RP11-861E21.1 | BAIAP3  | 0.409190414 | 3.77E-19    |
| RP11-861E21.1 | PHLDA2  | 0.307791894 | 4.36E-11    |
| RP11-861E21.1 | GAP43   | 0.280116391 | 2.34E-09    |
| RP11-861E21.1 | S100A1  | 0.328098974 | 1.78E-12    |
| RP11-861E21.1 | PTPRE   | 0.293635775 | 3.53E-10    |
| RP11-861E21.1 | CCND1   | 0.236114415 | 5.62E-07    |

|               |            |             |             |
|---------------|------------|-------------|-------------|
| RP11-861E21.1 | ST6GALNAC5 | 0.189265031 | 6.60E-05    |
| RP11-861E21.1 | KRT17      | 0.20825906  | 1.09E-05    |
| RP11-861E21.1 | HPCAL4     | 0.446867108 | 6.16E-23    |
| RP11-861E21.1 | GABBR2     | 0.29387138  | 3.41E-10    |
| RP11-861E21.1 | DIRAS3     | 0.419877432 | 3.55E-20    |
| RP11-861E21.1 | SERINC2    | 0.323099793 | 4.00E-12    |
| RP11-861E21.1 | PTCHD4     | 0.268229088 | 1.14E-08    |
| RP11-861E21.1 | EPS8       | 0.306732313 | 5.12E-11    |
| RP11-861E21.1 | LY6E       | 0.304743648 | 6.91E-11    |
| RP11-861E21.1 | UPP1       | 0.338115918 | 3.35E-13    |
| RP11-861E21.1 | AHNAK2     | 0.217369189 | 4.30E-06    |
| RP11-861E21.1 | PLXNC1     | 0.289263407 | 6.58E-10    |
| RP11-861E21.1 | TNC        | 0.042351334 | 0.376034613 |
| RP11-861E21.1 | DUSP4      | 0.297459204 | 2.03E-10    |
| RP11-861E21.1 | NRCAM      | 0.262385647 | 2.41E-08    |
| RP11-861E21.1 | NRP2       | 0.368478948 | 1.45E-15    |
| RP11-861E21.1 | CTSC       | 0.243563966 | 2.38E-07    |
| RP11-861E21.1 | AMIGO2     | 0.398735879 | 3.51E-18    |
| RP11-861E21.1 | NAB2       | 0.474762889 | 4.62E-26    |
| RP11-861E21.1 | TBC1D2     | 0.210909999 | 8.32E-06    |
| RP11-861E21.1 | PHLDA3     | 0.355168651 | 1.69E-14    |
| RP11-861E21.1 | PTP4A3     | 0.442342682 | 1.86E-22    |
| RP11-861E21.1 | CRABP2     | 0.310919857 | 2.71E-11    |
| RP11-861E21.1 | GOS2       | 0.296679908 | 2.27E-10    |
| RP11-861E21.1 | S100A6     | 0.318404728 | 8.44E-12    |
| RP11-861E21.1 | FOXQ1      | 0.288364678 | 7.46E-10    |
| RP11-861E21.1 | LRG1       | 0.337043712 | 4.01E-13    |
| RP11-861E21.1 | LAMP5      | 0.246565404 | 1.67E-07    |
| RP11-861E21.1 | ALDH3B1    | 0.311510925 | 2.47E-11    |
| RP11-861E21.1 | CDH2       | 0.225422858 | 1.83E-06    |
| RP11-861E21.1 | SCG5       | 0.446459162 | 6.81E-23    |
| RP11-861E21.1 | ZCCHC16    | 0.44726286  | 5.58E-23    |
| RP11-861E21.1 | GRB7       | 0.360520741 | 6.39E-15    |
| RP11-861E21.1 | TIAM1      | 0.315035912 | 1.43E-11    |
| RP11-861E21.1 | FXYD5      | 0.357811504 | 1.05E-14    |
| RP11-861E21.1 | CLDN9      | 0.29220527  | 4.33E-10    |
| RP11-861E21.1 | FAM43A     | 0.335810796 | 4.94E-13    |
| RP11-861E21.1 | CHST2      | 0.349522799 | 4.64E-14    |
| RP11-861E21.1 | HMGA2      | 0.391337392 | 1.62E-17    |
| RP11-861E21.1 | GALNT7     | 0.358551651 | 9.17E-15    |
| RP11-861E21.1 | CBLN1      | 0.236242076 | 5.54E-07    |
| RP11-861E21.1 | STRA6      | 0.378249933 | 2.22E-16    |
| RP11-861E21.1 | MUC21      | 0.276180175 | 3.98E-09    |
| RP11-861E21.1 | PRR36      | 0.457935406 | 3.84E-24    |
| RP11-861E21.1 | NFE2L3     | 0.220511621 | 3.09E-06    |
| RP11-861E21.1 | NR1D1      | 0.319869418 | 6.69E-12    |
| RP11-861E21.1 | MUC1       | 0.156106103 | 0.001032196 |
| RP11-861E21.1 | NAT8L      | 0.408603743 | 4.28E-19    |
| RP11-861E21.1 | APOC1      | 0.319157215 | 7.49E-12    |
| RP11-861E21.1 | EVA1A      | 0.232724465 | 8.22E-07    |
| RP11-861E21.1 | ENTPD1     | 0.380141576 | 1.53E-16    |

|               |           |             |             |
|---------------|-----------|-------------|-------------|
| RP11-861E21.1 | COL1A1    | 0.17507516  | 0.000227553 |
| RP11-861E21.1 | FNDC4     | 0.319033952 | 7.64E-12    |
| RP11-861E21.1 | FRMD3     | 0.408685304 | 4.20E-19    |
| RP11-861E21.1 | SHROOM4   | 0.35233459  | 2.82E-14    |
| RP11-861E21.1 | NELL2     | 0.35403531  | 2.08E-14    |
| RP11-861E21.1 | EPHB3     | 0.297517219 | 2.01E-10    |
| RP11-861E21.1 | TMC6      | 0.38891993  | 2.65E-17    |
| RP11-861E21.1 | NOD1      | 0.442914317 | 1.62E-22    |
| RP11-861E21.1 | GGCT      | 0.355734044 | 1.53E-14    |
| RP11-861E21.1 | ICAM1     | 0.25108827  | 9.74E-08    |
| RP11-861E21.1 | PRSS23    | 0.296497921 | 2.33E-10    |
| RP11-861E21.1 | CFI       | 0.320825878 | 5.75E-12    |
| RP11-861E21.1 | CD55      | 0.228864014 | 1.26E-06    |
| RP11-861E21.1 | RASD2     | 0.356079295 | 1.44E-14    |
| RP11-861E21.1 | KLK11     | 0.345951078 | 8.69E-14    |
| RP11-861E21.1 | ICAM5     | 0.616646065 | 2.45E-47    |
| RP11-861E21.1 | ADORA1    | 0.294188545 | 3.26E-10    |
| RP11-861E21.1 | ITGA2     | 0.1607928   | 0.000721161 |
| RP11-861E21.1 | ABCC3     | 0.436509879 | 7.55E-22    |
| RP11-861E21.1 | MFGE8     | 0.35831633  | 9.57E-15    |
| RP11-861E21.1 | STK32A    | 0.399821276 | 2.79E-18    |
| RP11-861E21.1 | CYSLTR2   | 0.398967086 | 3.34E-18    |
| RP11-861E21.1 | LAD1      | 0.309239279 | 3.50E-11    |
| RP11-861E21.1 | MGAT3     | 0.196310615 | 3.45E-05    |
| RP11-861E21.1 | IGFBP6    | 0.426739746 | 7.43E-21    |
| RP11-861E21.1 | CYP2S1    | 0.206053089 | 1.35E-05    |
| RP11-861E21.1 | KCNJ2     | 0.39091895  | 1.77E-17    |
| RP11-861E21.1 | FAM20A    | 0.386559206 | 4.27E-17    |
| RP11-861E21.1 | TGFA      | 0.366268721 | 2.20E-15    |
| RP11-861E21.1 | MXRA8     | 0.384414937 | 6.57E-17    |
| RP11-861E21.1 | C8orf4    | 0.187266586 | 7.90E-05    |
| RP11-861E21.1 | CLDN10    | 0.216388657 | 4.76E-06    |
| RP11-861E21.1 | PDE5A     | 0.29225066  | 4.30E-10    |
| RP11-861E21.1 | APOE      | 0.36189763  | 4.96E-15    |
| RP11-861E21.1 | SPOCK2    | 0.154089353 | 0.001200806 |
| RP11-861E21.1 | TENM1     | 0.672661883 | 3.93E-59    |
| RP11-861E21.1 | SLIT1     | 0.478392416 | 1.73E-26    |
| RP11-861E21.1 | CXCL14    | 0.243910635 | 2.29E-07    |
| RP11-861E21.1 | ECM1      | 0.429529125 | 3.90E-21    |
| RP11-861E21.1 | DUSP5     | 0.214867897 | 5.56E-06    |
| RP11-861E21.1 | SEZ6L2    | 0.318672957 | 8.09E-12    |
| RP11-861E21.1 | THRSP     | 0.36012003  | 6.88E-15    |
| RP11-861E21.1 | C19orf33  | 0.24536568  | 1.93E-07    |
| RP11-861E21.1 | MPZL2     | 0.291249377 | 4.96E-10    |
| RP11-861E21.1 | CTSH      | 0.343620066 | 1.30E-13    |
| RP11-861E21.1 | CYP1B1    | 0.210251697 | 8.89E-06    |
| RP11-861E21.1 | ALOX5     | 0.173016566 | 0.000270246 |
| RP11-861E21.1 | SYTL5     | 0.273463458 | 5.72E-09    |
| RP11-861E21.1 | TNFRSF12A | 0.373767776 | 5.29E-16    |
| RP11-861E21.1 | DUSP6     | 0.353935309 | 2.12E-14    |
| RP11-861E21.1 | ALOX15B   | 0.265731909 | 1.57E-08    |

|               |          |             |             |
|---------------|----------|-------------|-------------|
| RP11-861E21.1 | SDC4     | 0.348791163 | 5.28E-14    |
| RP11-861E21.1 | MDK      | 0.361775359 | 5.08E-15    |
| RP11-861E21.1 | KRT19    | 0.210504323 | 8.67E-06    |
| RP11-861E21.1 | MET      | 0.212307597 | 7.23E-06    |
| RP11-861E21.1 | TESC     | 0.471824856 | 1.02E-25    |
| RP11-861E21.1 | CXCL17   | 0.206431467 | 1.30E-05    |
| RP11-861E21.1 | NPC2     | 0.452494662 | 1.52E-23    |
| RP11-861E21.1 | COMP     | 0.252514804 | 8.19E-08    |
| RP11-861E21.1 | TUSC3    | 0.377570638 | 2.53E-16    |
| RP11-861E21.1 | TMPRSS4  | 0.28923901  | 6.60E-10    |
| RP11-861E21.1 | LGALS3   | 0.35702157  | 1.21E-14    |
| RP11-861E21.1 | CRLF1    | 0.220467791 | 3.11E-06    |
| RP11-861E21.1 | CTXN1    | 0.358331649 | 9.55E-15    |
| RP11-861E21.1 | PCSK1N   | 0.344458086 | 1.13E-13    |
| RP11-861E21.1 | NMU      | 0.284488523 | 1.28E-09    |
| RP11-861E21.1 | GALE     | 0.517547276 | 1.90E-31    |
| RP11-861E21.1 | PCSK2    | 0.29227449  | 4.29E-10    |
| RP11-861E21.1 | GJB3     | 0.380892645 | 1.32E-16    |
| RP11-861E21.1 | SLPI     | 0.124290297 | 0.00913763  |
| RP11-861E21.1 | AGR2     | 0.280333847 | 2.27E-09    |
| RP11-861E21.1 | MRC2     | 0.359521728 | 7.68E-15    |
| RP11-861E21.1 | GOLT1A   | 0.491862715 | 4.01E-28    |
| RP11-861E21.1 | SLC27A6  | 0.229197642 | 1.21E-06    |
| RP11-861E21.1 | KCNN4    | 0.252382746 | 8.32E-08    |
| RP11-861E21.1 | ETV4     | 0.468638682 | 2.38E-25    |
| RP11-861E21.1 | SYT12    | 0.330091185 | 1.28E-12    |
| RP11-861E21.1 | PVRL4    | 0.281643075 | 1.90E-09    |
| RP11-861E21.1 | PLCD3    | 0.34618604  | 8.34E-14    |
| RP11-861E21.1 | PLAU     | 0.210486734 | 8.69E-06    |
| RP11-861E21.1 | LRRK2    | 0.461508053 | 1.53E-24    |
| RP11-861E21.1 | SFN      | 0.218059974 | 4.00E-06    |
| RP11-861E21.1 | LPAR5    | 0.421387087 | 2.52E-20    |
| RP11-861E21.1 | NGEF     | 0.318083733 | 8.88E-12    |
| RP11-861E21.1 | DTX4     | 0.292275909 | 4.29E-10    |
| RP11-861E21.1 | CST6     | 0.39546905  | 6.93E-18    |
| RP11-861E21.1 | QPCT     | 0.396257849 | 5.88E-18    |
| RP11-861E21.1 | TIMP1    | 0.421040135 | 2.73E-20    |
| RP11-861E21.1 | CAMK2N1  | 0.341144589 | 2.00E-13    |
| RP11-861E21.1 | KLHDC8A  | 0.466512624 | 4.16E-25    |
| RP11-861E21.1 | PDLIM4   | 0.337487687 | 3.72E-13    |
| RP11-861E21.1 | SCEL     | 0.219083385 | 3.59E-06    |
| RP11-861E21.1 | LCN2     | 0.127119251 | 0.007660537 |
| RP11-861E21.1 | PROS1    | 0.251785437 | 8.95E-08    |
| RP11-861E21.1 | GABRB2   | 0.307175578 | 4.79E-11    |
| RP11-861E21.1 | TMPRSS6  | 0.278376671 | 2.96E-09    |
| RP11-861E21.1 | KLK7     | 0.308139459 | 4.14E-11    |
| RP11-861E21.1 | PDZK1IP1 | 0.213947891 | 6.11E-06    |
| RP11-861E21.1 | CDH3     | 0.348152294 | 5.91E-14    |
| RP11-861E21.1 | LRP4     | 0.450322875 | 2.62E-23    |
| RP11-861E21.1 | IGSF1    | 0.398074598 | 4.03E-18    |
| RP11-861E21.1 | B3GNT3   | 0.180092781 | 0.000148439 |

|               |           |              |             |
|---------------|-----------|--------------|-------------|
| RP11-861E21.1 | CLDN1     | 0.216599823  | 4.65E-06    |
| RP11-861E21.1 | GDF15     | 0.225806832  | 1.76E-06    |
| RP11-861E21.1 | ARHGAP36  | 0.359549641  | 7.64E-15    |
| RP11-861E21.1 | LAMB3     | 0.237744638  | 4.67E-07    |
| RP11-861E21.1 | KLK10     | 0.365721626  | 2.44E-15    |
| RP11-861E21.1 | DPP4      | 0.251973382  | 8.75E-08    |
| RP11-861E21.1 | METTL7B   | 0.412910579  | 1.67E-19    |
| RP11-861E21.1 | LIPH      | 0.320146725  | 6.40E-12    |
| RP11-861E21.1 | CLDN16    | 0.225099309  | 1.90E-06    |
| RP11-861E21.1 | CHI3L1    | 0.262645932  | 2.33E-08    |
| RP11-861E21.1 | SLC22A31  | 0.494758228  | 1.75E-28    |
| RP11-861E21.1 | TACSTD2   | 0.264943252  | 1.74E-08    |
| RP11-861E21.1 | SFTPB     | 0.175879279  | 0.00021266  |
| RP11-861E21.1 | RXRG      | 0.497905165  | 7.02E-29    |
| RP11-861E21.1 | DCSTAMP   | 0.29044952   | 5.56E-10    |
| RP11-861E21.1 | CITED1    | 0.438750744  | 4.42E-22    |
| RP11-861E21.1 | SERPINA1  | 0.289064824  | 6.76E-10    |
| RP11-861E21.1 | PRR15     | 0.489733623  | 7.35E-28    |
| RP11-861E21.1 | SLC34A2   | 0.178933908  | 0.000164    |
| RP11-861E21.1 | FN1       | 0.172169468  | 0.000289897 |
| RP11-861E21.1 | ZCCHC12   | 0.469534345  | 1.87E-25    |
| RP3-449M8.6   | TFF3      | -0.532524932 | 1.61E-33    |
| RP3-449M8.6   | CCL21     | -0.374882825 | 4.27E-16    |
| RP3-449M8.6   | TPO       | -0.489279981 | 8.36E-28    |
| RP3-449M8.6   | MT1G      | -0.501980012 | 2.13E-29    |
| RP3-449M8.6   | DIO1      | -0.494759577 | 1.75E-28    |
| RP3-449M8.6   | DPT       | -0.314312299 | 1.60E-11    |
| RP3-449M8.6   | CDH16     | -0.472636665 | 8.19E-26    |
| RP3-449M8.6   | CRABP1    | -0.360344636 | 6.60E-15    |
| RP3-449M8.6   | SLC26A7   | -0.340302432 | 2.31E-13    |
| RP3-449M8.6   | MT1H      | -0.484919053 | 2.85E-27    |
| RP3-449M8.6   | SLC26A4   | -0.382700261 | 9.24E-17    |
| RP3-449M8.6   | SLC5A8    | -0.455416789 | 7.28E-24    |
| RP3-449M8.6   | PKHD1L1   | -0.398642263 | 3.57E-18    |
| RP3-449M8.6   | TFCP2L1   | -0.388080571 | 3.14E-17    |
| RP3-449M8.6   | WSCD2     | -0.472205993 | 9.20E-26    |
| RP3-449M8.6   | IPCEF1    | -0.390184016 | 2.05E-17    |
| RP3-449M8.6   | SLC5A5    | -0.420331879 | 3.20E-20    |
| RP3-449M8.6   | MT1F      | -0.569104741 | 4.83E-39    |
| RP3-449M8.6   | FOSB      | -0.231919323 | 8.99E-07    |
| RP3-449M8.6   | SEMA3D    | -0.409038341 | 3.89E-19    |
| RP3-449M8.6   | BMP8A     | -0.348691747 | 5.38E-14    |
| RP3-449M8.6   | MATN2     | -0.394066951 | 9.26E-18    |
| RP3-449M8.6   | PLA2R1    | -0.358914236 | 8.58E-15    |
| RP3-449M8.6   | COL23A1   | -0.409080062 | 3.86E-19    |
| RP3-449M8.6   | HGD       | -0.500128965 | 3.66E-29    |
| RP3-449M8.6   | TCEAL2    | -0.431368853 | 2.54E-21    |
| RP3-449M8.6   | CHRD1     | -0.226454486 | 1.64E-06    |
| RP3-449M8.6   | TNFRSF11B | -0.343920841 | 1.24E-13    |
| RP3-449M8.6   | FAM167A   | -0.420418597 | 3.14E-20    |
| RP3-449M8.6   | KIT       | -0.380538378 | 1.42E-16    |

|             |            |              |             |
|-------------|------------|--------------|-------------|
| RP3-449M8.6 | SLC4A4     | -0.403572595 | 1.26E-18    |
| RP3-449M8.6 | SMOC2      | -0.331718021 | 9.79E-13    |
| RP3-449M8.6 | FHL1       | -0.473499602 | 6.50E-26    |
| RP3-449M8.6 | OTOS       | -0.58756946  | 4.21E-42    |
| RP3-449M8.6 | IGFBPL1    | -0.365634605 | 2.48E-15    |
| RP3-449M8.6 | HBB        | -0.284404541 | 1.30E-09    |
| RP3-449M8.6 | BEX1       | -0.42554126  | 9.79E-21    |
| RP3-449M8.6 | FABP4      | -0.395734232 | 6.56E-18    |
| RP3-449M8.6 | LMOD1      | -0.388024403 | 3.18E-17    |
| RP3-449M8.6 | SOD3       | -0.59559553  | 1.71E-43    |
| RP3-449M8.6 | TMEM171    | -0.451126772 | 2.14E-23    |
| RP3-449M8.6 | PI16       | -0.298872004 | 1.65E-10    |
| RP3-449M8.6 | ZMAT4      | -0.52648847  | 1.13E-32    |
| RP3-449M8.6 | MFAP4      | -0.220622488 | 3.06E-06    |
| RP3-449M8.6 | CWH43      | -0.42667888  | 7.54E-21    |
| RP3-449M8.6 | SPX        | -0.420892404 | 2.82E-20    |
| RP3-449M8.6 | APOD       | -0.249767618 | 1.14E-07    |
| RP3-449M8.6 | DPP6       | -0.436086428 | 8.35E-22    |
| RP3-449M8.6 | MMRN1      | -0.228457787 | 1.32E-06    |
| RP3-449M8.6 | WDR72      | -0.267175366 | 1.30E-08    |
| RP3-449M8.6 | MPPED2     | -0.462230638 | 1.27E-24    |
| RP3-449M8.6 | PAPSS2     | -0.298365575 | 1.78E-10    |
| RP3-449M8.6 | DCN        | -0.171770075 | 0.000299618 |
| RP3-449M8.6 | SORBS2     | -0.426041803 | 8.73E-21    |
| RP3-449M8.6 | EGR2       | -0.123466997 | 0.009612662 |
| RP3-449M8.6 | EDN3       | -0.306507045 | 5.30E-11    |
| RP3-449M8.6 | DIO2       | -0.348666571 | 5.40E-14    |
| RP3-449M8.6 | ITPR1      | -0.42158691  | 2.41E-20    |
| RP3-449M8.6 | CFD        | -0.382162485 | 1.03E-16    |
| RP3-449M8.6 | CPXM1      | -0.376351274 | 3.21E-16    |
| RP3-449M8.6 | ELMO1      | -0.495375009 | 1.46E-28    |
| RP3-449M8.6 | GPC3       | -0.350746448 | 3.74E-14    |
| RP3-449M8.6 | MYOC       | -0.123244282 | 0.00974488  |
| RP3-449M8.6 | DEPTOR     | -0.44446624  | 1.11E-22    |
| RP3-449M8.6 | DGKI       | -0.381599037 | 1.15E-16    |
| RP3-449M8.6 | CARTPT     | -0.373768015 | 5.29E-16    |
| RP3-449M8.6 | IYD        | -0.220020035 | 3.26E-06    |
| RP3-449M8.6 | LYVE1      | -0.232250016 | 8.67E-07    |
| RP3-449M8.6 | CLCNKB     | -0.453379218 | 1.22E-23    |
| RP3-449M8.6 | NCAM1      | -0.461804275 | 1.42E-24    |
| RP3-449M8.6 | HBA2       | -0.3479176   | 6.16E-14    |
| RP3-449M8.6 | GLT8D2     | -0.391056315 | 1.72E-17    |
| RP3-449M8.6 | OGDHL      | -0.43623167  | 8.07E-22    |
| RP3-449M8.6 | LIFR       | -0.322898726 | 4.13E-12    |
| RP3-449M8.6 | CSGALNACT1 | -0.298074596 | 1.85E-10    |
| RP3-449M8.6 | RAP1GAP    | -0.357874641 | 1.04E-14    |
| RP3-449M8.6 | COL9A3     | -0.449144243 | 3.51E-23    |
| RP3-449M8.6 | FBLN1      | -0.240893858 | 3.25E-07    |
| RP3-449M8.6 | EFEMP1     | -0.327148878 | 2.08E-12    |
| RP3-449M8.6 | AOX1       | -0.444793049 | 1.02E-22    |
| RP3-449M8.6 | GRIN2C     | -0.493708918 | 2.36E-28    |



|             |          |              |             |
|-------------|----------|--------------|-------------|
| RP3-449M8.6 | C11orf74 | -0.591420056 | 9.16E-43    |
| RP3-449M8.6 | PPARGC1A | -0.432312425 | 2.04E-21    |
| RP3-449M8.6 | ANGPTL1  | -0.321891612 | 4.85E-12    |
| RP3-449M8.6 | SCARA5   | -0.26494671  | 1.74E-08    |
| RP3-449M8.6 | LTF      | -0.46932271  | 1.98E-25    |
| RP3-449M8.6 | CA4      | -0.367360097 | 1.79E-15    |
| RP3-449M8.6 | TG       | -0.30249637  | 9.66E-11    |
| RP3-449M8.6 | FCGBP    | -0.543568304 | 4.08E-35    |
| RP3-449M8.6 | PBX4     | -0.489028149 | 8.98E-28    |
| RP3-449M8.6 | CYR61    | -0.269290229 | 9.90E-09    |
| RP3-449M8.6 | FOS      | -0.286550821 | 9.63E-10    |
| RP3-449M8.6 | KHDRBS2  | -0.405975317 | 7.54E-19    |
| RP3-449M8.6 | MUM1L1   | -0.438723182 | 4.45E-22    |
| RP3-449M8.6 | RGS16    | -0.393419251 | 1.06E-17    |
| RP3-449M8.6 | MT1M     | -0.463485897 | 9.18E-25    |
| RP3-449M8.6 | LRP2     | -0.321605668 | 5.08E-12    |
| RP3-449M8.6 | MAFB     | -0.380934672 | 1.31E-16    |
| RP3-449M8.6 | KCNK2    | -0.405083303 | 9.13E-19    |
| RP3-449M8.6 | TBC1D4   | -0.355607161 | 1.57E-14    |
| RP3-449M8.6 | MIOX     | -0.522426321 | 4.12E-32    |
| RP3-449M8.6 | TPPP     | -0.330456875 | 1.21E-12    |
| RP3-449M8.6 | FMOD     | -0.429701911 | 3.74E-21    |
| RP3-449M8.6 | CITED2   | -0.284108385 | 1.35E-09    |
| RP3-449M8.6 | RGS8     | -0.458658523 | 3.19E-24    |
| RP3-449M8.6 | ABI3BP   | -0.203471465 | 1.74E-05    |
| RP3-449M8.6 | ADH1B    | -0.319052168 | 7.62E-12    |
| RP3-449M8.6 | OGN      | -0.215931418 | 4.99E-06    |
| RP3-449M8.6 | NR4A1    | -0.181237636 | 0.000134435 |
| RP3-449M8.6 | FOXJ1    | -0.428795147 | 4.62E-21    |
| RP3-449M8.6 | ALDH1A1  | -0.452538478 | 1.50E-23    |
| RP3-449M8.6 | OCA2     | -0.421720713 | 2.34E-20    |
| RP3-449M8.6 | TMEM139  | -0.364469361 | 3.08E-15    |
| RP3-449M8.6 | ARHGAP24 | -0.437852869 | 5.48E-22    |
| RP3-449M8.6 | SLC25A15 | -0.264859874 | 1.76E-08    |
| RP3-449M8.6 | DES      | -0.242773777 | 2.61E-07    |
| RP3-449M8.6 | GDF10    | -0.391828585 | 1.47E-17    |
| RP3-449M8.6 | KIAA1324 | -0.418777541 | 4.54E-20    |
| RP3-449M8.6 | JUN      | -0.237555011 | 4.77E-07    |
| RP3-449M8.6 | C7       | -0.143931408 | 0.00250403  |
| RP3-449M8.6 | LGI3     | -0.502509348 | 1.82E-29    |
| RP3-449M8.6 | CDON     | -0.406830099 | 6.28E-19    |
| RP3-449M8.6 | BCL2     | -0.386057405 | 4.73E-17    |
| RP3-449M8.6 | HLF      | -0.37670303  | 3.00E-16    |
| RP3-449M8.6 | EGR1     | -0.193812424 | 4.35E-05    |
| RP3-449M8.6 | IP6K3    | -0.406948887 | 6.12E-19    |
| RP3-449M8.6 | SCUBE3   | -0.345299924 | 9.74E-14    |
| RP3-449M8.6 | PKNOX2   | -0.448275349 | 4.35E-23    |
| RP3-449M8.6 | SMAD9    | -0.282208263 | 1.76E-09    |
| RP3-449M8.6 | IQGAP2   | -0.388367011 | 2.97E-17    |
| RP3-449M8.6 | GNA14    | -0.482129402 | 6.18E-27    |
| RP3-449M8.6 | LAYN     | -0.412934133 | 1.66E-19    |

|             |          |              |             |
|-------------|----------|--------------|-------------|
| RP3-449M8.6 | AVPR1A   | -0.332954912 | 7.97E-13    |
| RP3-449M8.6 | PDLIM3   | -0.412366429 | 1.88E-19    |
| RP3-449M8.6 | GPM6A    | -0.298112963 | 1.84E-10    |
| RP3-449M8.6 | SDPR     | -0.168293149 | 0.000398055 |
| RP3-449M8.6 | CRYAB    | -0.317865847 | 9.19E-12    |
| RP3-449M8.6 | FOXA2    | -0.418130175 | 5.25E-20    |
| RP3-449M8.6 | C8orf88  | -0.26430529  | 1.88E-08    |
| RP3-449M8.6 | ISM1     | -0.356176282 | 1.41E-14    |
| RP3-449M8.6 | BMP2     | -0.242903904 | 2.57E-07    |
| RP3-449M8.6 | ID4      | -0.466462421 | 4.22E-25    |
| RP3-449M8.6 | NUPR1    | -0.444357096 | 1.14E-22    |
| RP3-449M8.6 | SERTM1   | -0.440576836 | 2.85E-22    |
| RP3-449M8.6 | IRS1     | -0.330310074 | 1.24E-12    |
| RP3-449M8.6 | FIBIN    | -0.224126434 | 2.11E-06    |
| RP3-449M8.6 | PODN     | -0.212070415 | 7.40E-06    |
| RP3-449M8.6 | TDRD9    | -0.319032387 | 7.64E-12    |
| RP3-449M8.6 | EPHA3    | -0.254884678 | 6.13E-08    |
| RP3-449M8.6 | AIF1L    | -0.30442181  | 7.25E-11    |
| RP3-449M8.6 | EBF4     | -0.533488503 | 1.17E-33    |
| RP3-449M8.6 | ADM2     | -0.475051159 | 4.28E-26    |
| RP3-449M8.6 | GSTM3    | -0.485962126 | 2.13E-27    |
| RP3-449M8.6 | HSD17B6  | -0.244464183 | 2.14E-07    |
| RP3-449M8.6 | AGR3     | -0.252821659 | 7.89E-08    |
| RP3-449M8.6 | EPHB1    | -0.282053022 | 1.79E-09    |
| RP3-449M8.6 | TMOD1    | -0.33145087  | 1.02E-12    |
| RP3-449M8.6 | WASF3    | -0.326263814 | 2.40E-12    |
| RP3-449M8.6 | SELV     | -0.486980203 | 1.60E-27    |
| RP3-449M8.6 | ENPP1    | -0.202512504 | 1.91E-05    |
| RP3-449M8.6 | SYNE1    | -0.368716688 | 1.39E-15    |
| RP3-449M8.6 | PLCH1    | -0.404384826 | 1.06E-18    |
| RP3-449M8.6 | CCDC146  | -0.394812163 | 7.94E-18    |
| RP3-449M8.6 | SLC16A2  | -0.386370156 | 4.44E-17    |
| RP3-449M8.6 | IER2     | -0.469459015 | 1.91E-25    |
| RP3-449M8.6 | KCNAB1   | -0.393530239 | 1.03E-17    |
| RP3-449M8.6 | SYNDIG1  | -0.486496781 | 1.83E-27    |
| RP3-449M8.6 | C16orf89 | -0.481379083 | 7.60E-27    |
| RP3-449M8.6 | CTGF     | -0.115284481 | 0.015663905 |
| RP3-449M8.6 | NR4A3    | -0.101935546 | 0.032739594 |
| RP3-449M8.6 | KIAA1456 | -0.298977602 | 1.62E-10    |
| RP3-449M8.6 | AQP4     | -0.274268785 | 5.14E-09    |
| RP3-449M8.6 | RNF150   | -0.426156053 | 8.50E-21    |
| RP3-449M8.6 | C1S      | -0.148571327 | 0.001800055 |
| RP3-449M8.6 | PFKFB2   | -0.2595024   | 3.46E-08    |
| RP3-449M8.6 | PROX1    | -0.278536595 | 2.90E-09    |
| RP3-449M8.6 | TCF7L1   | -0.485738661 | 2.26E-27    |
| RP3-449M8.6 | HSPB6    | -0.29850337  | 1.74E-10    |
| RP3-449M8.6 | FHDC1    | -0.210875791 | 8.35E-06    |
| RP3-449M8.6 | PRR15L   | -0.389445824 | 2.38E-17    |
| RP3-449M8.6 | SLC1A1   | -0.270847814 | 8.08E-09    |
| RP3-449M8.6 | BTBD11   | -0.481955367 | 6.49E-27    |
| RP3-449M8.6 | TRIM58   | -0.25615795  | 5.24E-08    |

|             |          |              |             |
|-------------|----------|--------------|-------------|
| RP3-449M8.6 | LRIG1    | -0.336342055 | 4.52E-13    |
| RP3-449M8.6 | ROR2     | -0.396654061 | 5.41E-18    |
| RP3-449M8.6 | GPR125   | -0.364501132 | 3.06E-15    |
| RP3-449M8.6 | FLRT1    | -0.513373083 | 6.90E-31    |
| RP3-449M8.6 | PGF      | -0.52598638  | 1.33E-32    |
| RP3-449M8.6 | DUSP1    | -0.220289312 | 3.17E-06    |
| RP3-449M8.6 | PLA2G7   | -0.332998456 | 7.91E-13    |
| RP3-449M8.6 | PLSCR4   | -0.202342512 | 1.94E-05    |
| RP3-449M8.6 | FAM46B   | -0.368993612 | 1.32E-15    |
| RP3-449M8.6 | GLDC     | -0.463071449 | 1.02E-24    |
| RP3-449M8.6 | ZBTB16   | -0.13169639  | 0.005718077 |
| RP3-449M8.6 | OMD      | -0.17106267  | 0.000317587 |
| RP3-449M8.6 | HSD11B2  | -0.419892807 | 3.53E-20    |
| RP3-449M8.6 | FGL2     | -0.184704207 | 9.92E-05    |
| RP3-449M8.6 | CLCNKA   | -0.53515213  | 6.79E-34    |
| RP3-449M8.6 | GATM     | -0.292410612 | 4.20E-10    |
| RP3-449M8.6 | TNS3     | -0.228154184 | 1.36E-06    |
| RP3-449M8.6 | TOB1     | -0.339818129 | 2.51E-13    |
| RP3-449M8.6 | MARC2    | -0.416836924 | 7.01E-20    |
| RP3-449M8.6 | LRRC2    | -0.318157819 | 8.77E-12    |
| RP3-449M8.6 | SORD     | -0.157104252 | 0.000957085 |
| RP3-449M8.6 | RIMS4    | -0.337168185 | 3.93E-13    |
| RP3-449M8.6 | SLC29A4  | -0.514876203 | 4.35E-31    |
| RP3-449M8.6 | SLC39A14 | -0.259035826 | 3.67E-08    |
| RP3-449M8.6 | FAXDC2   | -0.399203301 | 3.18E-18    |
| RP3-449M8.6 | HSPB8    | -0.376728135 | 2.99E-16    |
| RP3-449M8.6 | CCL19    | -0.113290621 | 0.017568743 |
| RP3-449M8.6 | KCNIP3   | -0.494675255 | 1.79E-28    |
| RP3-449M8.6 | CGNL1    | -0.288825464 | 6.99E-10    |
| RP3-449M8.6 | ATF3     | -0.068825712 | 0.149965051 |
| RP3-449M8.6 | SGCD     | -0.288243293 | 7.59E-10    |
| RP3-449M8.6 | STARD13  | -0.295887608 | 2.55E-10    |
| RP3-449M8.6 | LDHD     | -0.488733412 | 9.76E-28    |
| RP3-449M8.6 | RCAN1    | -0.249422102 | 1.19E-07    |
| RP3-449M8.6 | ID3      | -0.499282907 | 4.70E-29    |
| RP3-449M8.6 | SYTL3    | -0.401833387 | 1.82E-18    |
| RP3-449M8.6 | MT1E     | -0.459444034 | 2.61E-24    |
| RP3-449M8.6 | CAMK1D   | -0.312490076 | 2.12E-11    |
| RP3-449M8.6 | PRKCQ    | -0.372222961 | 7.12E-16    |
| RP3-449M8.6 | NUAK2    | -0.349366679 | 4.77E-14    |
| RP3-449M8.6 | LIPG     | -0.223610501 | 2.22E-06    |
| RP3-449M8.6 | SLC25A25 | -0.109631915 | 0.021594621 |
| RP3-449M8.6 | PRKX     | -0.100493345 | 0.035300255 |
| RP3-449M8.6 | SRPX     | -0.201234905 | 2.16E-05    |
| RP3-449M8.6 | FAM189A1 | -0.400586213 | 2.38E-18    |
| RP3-449M8.6 | PLEKHH1  | -0.198900975 | 2.70E-05    |
| RP3-449M8.6 | WNT11    | -0.451317047 | 2.04E-23    |
| RP3-449M8.6 | SNAI1    | -0.352385826 | 2.79E-14    |
| RP3-449M8.6 | FDCSP    | -0.109395451 | 0.021880368 |
| RP3-449M8.6 | MT1X     | -0.411550014 | 2.25E-19    |
| RP3-449M8.6 | ACACB    | -0.3860979   | 4.69E-17    |

|             |          |              |             |
|-------------|----------|--------------|-------------|
| RP3-449M8.6 | ARC      | -0.035812612 | 0.454183764 |
| RP3-449M8.6 | KLK4     | -0.282274646 | 1.74E-09    |
| RP3-449M8.6 | ZFPM2    | -0.265617001 | 1.59E-08    |
| RP3-449M8.6 | AKAP12   | -0.110016223 | 0.021137124 |
| RP3-449M8.6 | GJB6     | -0.295246475 | 2.80E-10    |
| RP3-449M8.6 | ERO1LB   | -0.33474745  | 5.91E-13    |
| RP3-449M8.6 | DNALI1   | -0.447270929 | 5.57E-23    |
| RP3-449M8.6 | HKDC1    | -0.365866244 | 2.37E-15    |
| RP3-449M8.6 | ZFP36L2  | -0.280924991 | 2.09E-09    |
| RP3-449M8.6 | CAPSL    | -0.531874418 | 1.99E-33    |
| RP3-449M8.6 | CYP7B1   | -0.214489023 | 5.78E-06    |
| RP3-449M8.6 | CPQ      | -0.335671236 | 5.06E-13    |
| RP3-449M8.6 | RPS6KA6  | -0.349081244 | 5.02E-14    |
| RP3-449M8.6 | TLE1     | -0.423656527 | 1.51E-20    |
| RP3-449M8.6 | TP53INP2 | -0.342717849 | 1.52E-13    |
| RP3-449M8.6 | KATNAL2  | -0.47824824  | 1.80E-26    |
| RP3-449M8.6 | SGPP2    | -0.139380136 | 0.003430109 |
| RP3-449M8.6 | CTH      | -0.393608249 | 1.02E-17    |
| RP3-449M8.6 | KIF12    | -0.405108621 | 9.08E-19    |
| RP3-449M8.6 | TMEM220  | -0.398745237 | 3.50E-18    |
| RP3-449M8.6 | CENPJ    | -0.302588422 | 9.53E-11    |
| RP3-449M8.6 | FAM155B  | -0.345345595 | 9.66E-14    |
| RP3-449M8.6 | WFS1     | -0.528367259 | 6.20E-33    |
| RP3-449M8.6 | SELENBP1 | -0.399051393 | 3.28E-18    |
| RP3-449M8.6 | SNTA1    | -0.545056956 | 2.46E-35    |
| RP3-449M8.6 | FRAS1    | -0.090174761 | 0.059048529 |
| RP3-449M8.6 | FBLN7    | -0.454076915 | 1.02E-23    |
| RP3-449M8.6 | AGPAT9   | -0.296006113 | 2.51E-10    |
| RP3-449M8.6 | GPR83    | -0.340618446 | 2.19E-13    |
| RP3-449M8.6 | PRTG     | -0.222567572 | 2.49E-06    |
| RP3-449M8.6 | EGR3     | -0.053223268 | 0.265811215 |
| RP3-449M8.6 | GRAMD2   | -0.325106919 | 2.89E-12    |
| RP3-449M8.6 | HYOU1    | -0.343893466 | 1.24E-13    |
| RP3-449M8.6 | FBLN5    | -0.271899182 | 7.03E-09    |
| RP3-449M8.6 | ITM2A    | -0.323242469 | 3.91E-12    |
| RP3-449M8.6 | SRF      | -0.325405699 | 2.75E-12    |
| RP3-449M8.6 | FGFR2    | -0.192705101 | 4.82E-05    |
| RP3-449M8.6 | MT1A     | -0.2818668   | 1.84E-09    |
| RP3-449M8.6 | MAMDC2   | -0.10793228  | 0.02372243  |
| RP3-449M8.6 | FHL2     | -0.464487126 | 7.07E-25    |
| RP3-449M8.6 | FTCDNL1  | -0.374061171 | 5.00E-16    |
| RP3-449M8.6 | PKIA     | -0.216089939 | 4.91E-06    |
| RP3-449M8.6 | DNAJB4   | -0.102344108 | 0.032043657 |
| RP3-449M8.6 | SLC25A33 | -0.557177582 | 3.63E-37    |
| RP3-449M8.6 | EYA2     | -0.299176245 | 1.58E-10    |
| RP3-449M8.6 | LPAR1    | -0.269270088 | 9.93E-09    |
| RP3-449M8.6 | STX11    | -0.163470756 | 0.000584979 |
| RP3-449M8.6 | ARHGEF28 | -0.346075631 | 8.51E-14    |
| RP3-449M8.6 | OR2W3    | -0.391083902 | 1.71E-17    |
| RP3-449M8.6 | ALDH1B1  | -0.410043647 | 3.13E-19    |
| RP3-449M8.6 | CXCL12   | -0.223888076 | 2.16E-06    |

|             |          |              |             |
|-------------|----------|--------------|-------------|
| RP3-449M8.6 | OLFM2    | -0.423224987 | 1.66E-20    |
| RP3-449M8.6 | TUB      | -0.136786572 | 0.004087442 |
| RP3-449M8.6 | HTRA3    | -0.284076117 | 1.36E-09    |
| RP3-449M8.6 | CKB      | -0.588567498 | 2.84E-42    |
| RP3-449M8.6 | RGS2     | -0.152441426 | 0.001357024 |
| RP3-449M8.6 | SHANK2   | -0.313070119 | 1.94E-11    |
| RP3-449M8.6 | CNTFR    | -0.366050111 | 2.29E-15    |
| RP3-449M8.6 | CYTH3    | -0.301968239 | 1.04E-10    |
| RP3-449M8.6 | PLAC9    | -0.455481528 | 7.16E-24    |
| RP3-449M8.6 | WVOX     | -0.429528232 | 3.90E-21    |
| RP3-449M8.6 | NPR3     | -0.304418547 | 7.25E-11    |
| RP3-449M8.6 | SDC2     | -0.213886711 | 6.15E-06    |
| RP3-449M8.6 | KLF15    | -0.313490099 | 1.82E-11    |
| RP3-449M8.6 | TMEM164  | -0.417400656 | 6.18E-20    |
| RP3-449M8.6 | LONRF3   | 0.040193253  | 0.400863173 |
| RP3-449M8.6 | GBP1     | -0.088018978 | 0.065398862 |
| RP3-449M8.6 | ARHGAP6  | -0.209666842 | 9.43E-06    |
| RP3-449M8.6 | TMEM119  | -0.213926426 | 6.13E-06    |
| RP3-449M8.6 | SH3RF1   | -0.133571478 | 0.005059429 |
| RP3-449M8.6 | CRELD2   | -0.57277875  | 1.23E-39    |
| RP3-449M8.6 | PCP4     | -0.198283841 | 2.86E-05    |
| RP3-449M8.6 | GCSH     | -0.465252266 | 5.79E-25    |
| RP3-449M8.6 | IMPA2    | -0.346600925 | 7.76E-14    |
| RP3-449M8.6 | C1R      | -0.188114682 | 7.32E-05    |
| RP3-449M8.6 | SUCNR1   | -0.240625289 | 3.35E-07    |
| RP3-449M8.6 | SFRP1    | -0.318362277 | 8.50E-12    |
| RP3-449M8.6 | UGT8     | -0.33644517  | 4.44E-13    |
| RP3-449M8.6 | TLE4     | -0.188772594 | 6.90E-05    |
| RP3-449M8.6 | ANTXR1   | -0.238373908 | 4.34E-07    |
| RP3-449M8.6 | GPX3     | -0.404089024 | 1.13E-18    |
| RP3-449M8.6 | DPY19L2  | -0.391647918 | 1.52E-17    |
| RP3-449M8.6 | FAM46C   | -0.372836761 | 6.33E-16    |
| RP3-449M8.6 | IL33     | -0.216897709 | 4.51E-06    |
| RP3-449M8.6 | PEG3     | -0.274189711 | 5.19E-09    |
| RP3-449M8.6 | FAHD2A   | -0.502070929 | 2.07E-29    |
| RP3-449M8.6 | PTGDS    | -0.155218881 | 0.001103484 |
| RP3-449M8.6 | CHCHD10  | -0.601885371 | 1.30E-44    |
| RP3-449M8.6 | CD36     | -0.32971379  | 1.36E-12    |
| RP3-449M8.6 | ANKRD37  | -0.426600287 | 7.68E-21    |
| RP3-449M8.6 | TSPAN33  | -0.55972519  | 1.47E-37    |
| RP3-449M8.6 | PRDM16   | -0.295041904 | 2.88E-10    |
| RP3-449M8.6 | UST      | -0.260986229 | 2.87E-08    |
| RP3-449M8.6 | NEXN     | -0.300366543 | 1.32E-10    |
| RP3-449M8.6 | NUPR1L   | -0.311200106 | 2.59E-11    |
| RP3-449M8.6 | SLC24A3  | -0.452356146 | 1.57E-23    |
| RP3-449M8.6 | MARC1    | -0.380613765 | 1.40E-16    |
| RP3-449M8.6 | MYH11    | -0.219145254 | 3.57E-06    |
| RP3-449M8.6 | APOA1    | -0.528751869 | 5.47E-33    |
| RP3-449M8.6 | TMEM178B | -0.328808373 | 1.58E-12    |
| RP3-449M8.6 | CAPN6    | -0.197655926 | 3.04E-05    |
| RP3-449M8.6 | PPM1L    | -0.385896845 | 4.88E-17    |

|             |          |              |             |
|-------------|----------|--------------|-------------|
| RP3-449M8.6 | FZD8     | -0.513897739 | 5.87E-31    |
| RP3-449M8.6 | RCAN2    | -0.454914818 | 8.27E-24    |
| RP3-449M8.6 | COPZ2    | -0.56683329  | 1.12E-38    |
| RP3-449M8.6 | GAS1     | -0.211747452 | 7.65E-06    |
| RP3-449M8.6 | DACT1    | -0.314467002 | 1.56E-11    |
| RP3-449M8.6 | WBSCR17  | -0.387322451 | 3.66E-17    |
| RP3-449M8.6 | NCS1     | -0.373496021 | 5.58E-16    |
| RP3-449M8.6 | SPIRE2   | -0.421070693 | 2.71E-20    |
| RP3-449M8.6 | C15orf52 | -0.335218491 | 5.46E-13    |
| RP3-449M8.6 | SPAG5    | -0.415348414 | 9.75E-20    |
| RP3-449M8.6 | ARL4D    | -0.514001351 | 5.69E-31    |
| RP3-449M8.6 | FAM189A2 | -0.260242152 | 3.15E-08    |
| RP3-449M8.6 | MAP1LC3A | -0.602207412 | 1.14E-44    |
| RP3-449M8.6 | KLF6     | 0.093540841  | 0.050158879 |
| RP3-449M8.6 | ADD3     | -0.067941499 | 0.155282937 |
| RP3-449M8.6 | TSPAN7   | -0.359980285 | 7.06E-15    |
| RP3-449M8.6 | KLF9     | -0.127385958 | 0.007532936 |
| RP3-449M8.6 | KCNQ1    | -0.442756109 | 1.68E-22    |
| RP3-449M8.6 | MAN1A1   | -0.126490115 | 0.007969215 |
| RP3-449M8.6 | MLF1     | -0.241421918 | 3.06E-07    |
| RP3-449M8.6 | RARB     | -0.345412542 | 9.55E-14    |
| RP3-449M8.6 | CDC42EP2 | -0.461112819 | 1.70E-24    |
| RP3-449M8.6 | FAM3B    | -0.197451611 | 3.09E-05    |
| RP3-449M8.6 | GADD45B  | -0.205925887 | 1.37E-05    |
| RP3-449M8.6 | TMEM47   | -0.273795191 | 5.47E-09    |
| RP3-449M8.6 | SDF2L1   | -0.557999954 | 2.71E-37    |
| RP3-449M8.6 | CCDC85A  | -0.047424113 | 0.321504753 |
| RP3-449M8.6 | CRYBG3   | 0.052193317  | 0.275186026 |
| RP3-449M8.6 | FBLN2    | -0.094036137 | 0.048950403 |
| RP3-449M8.6 | PEBP4    | -0.302554736 | 9.58E-11    |
| RP3-449M8.6 | CDADC1   | -0.442878657 | 1.63E-22    |
| RP3-449M8.6 | FAM63A   | -0.282477186 | 1.69E-09    |
| RP3-449M8.6 | GLUL     | -0.217532069 | 4.22E-06    |
| RP3-449M8.6 | FREM2    | -0.218188278 | 3.95E-06    |
| RP3-449M8.6 | ACKR3    | -0.329280549 | 1.46E-12    |
| RP3-449M8.6 | DENND6A  | -0.358559927 | 9.16E-15    |
| RP3-449M8.6 | CLDN8    | -0.152851548 | 0.001316489 |
| RP3-449M8.6 | UTS2R    | -0.093217856 | 0.050960281 |
| RP3-449M8.6 | SCNN1B   | -0.317226658 | 1.02E-11    |
| RP3-449M8.6 | TTC30A   | -0.366102899 | 2.27E-15    |
| RP3-449M8.6 | CORO2B   | -0.408993045 | 3.93E-19    |
| RP3-449M8.6 | TC2N     | -0.28393279  | 1.39E-09    |
| RP3-449M8.6 | ALDH2    | -0.566416998 | 1.30E-38    |
| RP3-449M8.6 | GPR183   | -0.017300377 | 0.717743093 |
| RP3-449M8.6 | C4orf47  | -0.453773454 | 1.10E-23    |
| RP3-449M8.6 | SLC25A42 | -0.45884314  | 3.04E-24    |
| RP3-449M8.6 | LGMN     | -0.438078603 | 5.19E-22    |
| RP3-449M8.6 | ACSF2    | -0.561586307 | 7.51E-38    |
| RP3-449M8.6 | KIAA1467 | -0.343110099 | 1.42E-13    |
| RP3-449M8.6 | PRKG1    | -0.3696211   | 1.17E-15    |
| RP3-449M8.6 | GNAI1    | -0.368925956 | 1.33E-15    |

|             |          |              |             |
|-------------|----------|--------------|-------------|
| RP3-449M8.6 | ABCC4    | -0.243050067 | 2.53E-07    |
| RP3-449M8.6 | PRPS1    | -0.392083996 | 1.39E-17    |
| RP3-449M8.6 | TSPAN5   | -0.402941845 | 1.44E-18    |
| RP3-449M8.6 | CR2      | -0.161274785 | 0.000694666 |
| RP3-449M8.6 | CCDC170  | -0.305978756 | 5.74E-11    |
| RP3-449M8.6 | RRAD     | -0.169419124 | 0.000363286 |
| RP3-449M8.6 | SCGB2A1  | -0.523937968 | 2.56E-32    |
| RP3-449M8.6 | SESN3    | -0.184267703 | 0.00010312  |
| RP3-449M8.6 | SGK223   | -0.188642246 | 6.98E-05    |
| RP3-449M8.6 | NDRG2    | -0.470386205 | 1.49E-25    |
| RP3-449M8.6 | C3orf52  | -0.202631292 | 1.89E-05    |
| RP3-449M8.6 | FLRT3    | 0.408029899  | 4.84E-19    |
| RP3-449M8.6 | MST1R    | 0.502602464  | 1.77E-29    |
| RP3-449M8.6 | SDC1     | 0.163517137  | 0.000582846 |
| RP3-449M8.6 | ST8SIA4  | 0.374454202  | 4.64E-16    |
| RP3-449M8.6 | UBTD1    | 0.189486957  | 6.47E-05    |
| RP3-449M8.6 | EPHA2    | 0.435562269  | 9.46E-22    |
| RP3-449M8.6 | TMEM130  | 0.349327745  | 4.80E-14    |
| RP3-449M8.6 | SPINK2   | 0.243331826  | 2.45E-07    |
| RP3-449M8.6 | MMP16    | 0.498548545  | 5.82E-29    |
| RP3-449M8.6 | SIGLEC15 | 0.469703613  | 1.79E-25    |
| RP3-449M8.6 | RIN1     | 0.346118608  | 8.44E-14    |
| RP3-449M8.6 | IL1RN    | 0.372604645  | 6.62E-16    |
| RP3-449M8.6 | FCER1G   | 0.146270445  | 0.002122672 |
| RP3-449M8.6 | CD276    | 0.458245935  | 3.54E-24    |
| RP3-449M8.6 | CTSB     | 0.414643625  | 1.14E-19    |
| RP3-449M8.6 | FAM171A2 | 0.276098485  | 4.03E-09    |
| RP3-449M8.6 | ASPHD1   | 0.3667723    | 2.00E-15    |
| RP3-449M8.6 | C15orf48 | 0.198666447  | 2.76E-05    |
| RP3-449M8.6 | DYSF     | 0.311759543  | 2.38E-11    |
| RP3-449M8.6 | PDZRN4   | 0.272450291  | 6.54E-09    |
| RP3-449M8.6 | EFHD2    | 0.203934989  | 1.66E-05    |
| RP3-449M8.6 | ASF1B    | 0.245073516  | 2.00E-07    |
| RP3-449M8.6 | AQP1     | 0.187650662  | 7.63E-05    |
| RP3-449M8.6 | ARRDC2   | 0.382547431  | 9.52E-17    |
| RP3-449M8.6 | PRSS1    | 0.431734998  | 2.33E-21    |
| RP3-449M8.6 | MAPK13   | 0.527897565  | 7.21E-33    |
| RP3-449M8.6 | CST5     | 0.341318018  | 1.94E-13    |
| RP3-449M8.6 | AHR      | 0.527130935  | 9.22E-33    |
| RP3-449M8.6 | BAX      | 0.105836565  | 0.02659365  |
| RP3-449M8.6 | C1orf115 | 0.470505277  | 1.45E-25    |
| RP3-449M8.6 | PLK3     | 0.371907302  | 7.56E-16    |
| RP3-449M8.6 | JAG2     | 0.250577082  | 1.04E-07    |
| RP3-449M8.6 | RAD23B   | 0.684017964  | 7.56E-62    |
| RP3-449M8.6 | CA12     | -0.016650976 | 0.727910687 |
| RP3-449M8.6 | ADTRP    | 0.467696546  | 3.05E-25    |
| RP3-449M8.6 | UCP2     | 0.311854433  | 2.34E-11    |
| RP3-449M8.6 | IGFBP2   | 0.141948807  | 0.002875101 |
| RP3-449M8.6 | LOXL2    | 0.269057971  | 1.02E-08    |
| RP3-449M8.6 | GPX1     | 0.034630044  | 0.4692325   |
| RP3-449M8.6 | P3H3     | 0.215193102  | 5.38E-06    |

|             |          |             |             |
|-------------|----------|-------------|-------------|
| RP3-449M8.6 | C2orf81  | 0.292368202 | 4.23E-10    |
| RP3-449M8.6 | CDT1     | 0.244821826 | 2.06E-07    |
| RP3-449M8.6 | SNX25    | 0.48382081  | 3.87E-27    |
| RP3-449M8.6 | MTHFD1L  | 0.45996103  | 2.28E-24    |
| RP3-449M8.6 | CDC42BPG | 0.63099329  | 3.96E-50    |
| RP3-449M8.6 | MSN      | 0.686053753 | 2.39E-62    |
| RP3-449M8.6 | SIGLEC6  | 0.461313896 | 1.61E-24    |
| RP3-449M8.6 | F2R      | 0.251340521 | 9.45E-08    |
| RP3-449M8.6 | TMEM184A | 0.40099435  | 2.18E-18    |
| RP3-449M8.6 | CKS2     | 0.080530187 | 0.091945738 |
| RP3-449M8.6 | TAX1BP3  | 0.183035067 | 0.000114925 |
| RP3-449M8.6 | PMEPA1   | 0.3209874   | 5.60E-12    |
| RP3-449M8.6 | CXCL16   | 0.432846158 | 1.80E-21    |
| RP3-449M8.6 | FAXC     | 0.457754611 | 4.02E-24    |
| RP3-449M8.6 | VTCN1    | 0.385543367 | 5.24E-17    |
| RP3-449M8.6 | SH2D4A   | 0.529962644 | 3.70E-33    |
| RP3-449M8.6 | RNF24    | 0.526930732 | 9.83E-33    |
| RP3-449M8.6 | LY6G6C   | 0.417198828 | 6.46E-20    |
| RP3-449M8.6 | NID1     | 0.417447321 | 6.11E-20    |
| RP3-449M8.6 | STAC     | 0.490766506 | 5.48E-28    |
| RP3-449M8.6 | RAB34    | 0.317703301 | 9.43E-12    |
| RP3-449M8.6 | HES4     | 0.147084377 | 0.002002951 |
| RP3-449M8.6 | EPHA10   | 0.539092916 | 1.84E-34    |
| RP3-449M8.6 | ENTPD2   | 0.460460297 | 2.01E-24    |
| RP3-449M8.6 | DDB2     | 0.292310758 | 4.26E-10    |
| RP3-449M8.6 | NKAIN4   | 0.192244839 | 5.03E-05    |
| RP3-449M8.6 | TRIM29   | 0.352307602 | 2.83E-14    |
| RP3-449M8.6 | ADCY8    | 0.471330479 | 1.16E-25    |
| RP3-449M8.6 | SFTA2    | 0.234644654 | 6.63E-07    |
| RP3-449M8.6 | NRIP1    | 0.604560775 | 4.27E-45    |
| RP3-449M8.6 | VWA1     | 0.027894055 | 0.559965697 |
| RP3-449M8.6 | APLNR    | 0.144405995 | 0.002421943 |
| RP3-449M8.6 | REN      | 0.438540806 | 4.65E-22    |
| RP3-449M8.6 | EDIL3    | 0.247151005 | 1.56E-07    |
| RP3-449M8.6 | AGRN     | 0.474926413 | 4.43E-26    |
| RP3-449M8.6 | TREM1    | 0.336283121 | 4.56E-13    |
| RP3-449M8.6 | SRL      | 0.354588202 | 1.88E-14    |
| RP3-449M8.6 | RASGRF1  | 0.521813317 | 5.00E-32    |
| RP3-449M8.6 | RMI2     | 0.271456366 | 7.46E-09    |
| RP3-449M8.6 | SAMD1    | 0.147008494 | 0.002013846 |
| RP3-449M8.6 | MGAT4B   | 0.514779966 | 4.48E-31    |
| RP3-449M8.6 | NXN      | 0.407551766 | 5.37E-19    |
| RP3-449M8.6 | SH3BGRL3 | 0.159987306 | 0.000767537 |
| RP3-449M8.6 | CA11     | 0.222393325 | 2.53E-06    |
| RP3-449M8.6 | PLD3     | 0.224164659 | 2.10E-06    |
| RP3-449M8.6 | LURAP1L  | 0.435378094 | 9.88E-22    |
| RP3-449M8.6 | CARNS1   | 0.341410535 | 1.91E-13    |
| RP3-449M8.6 | PDLIM7   | 0.276874405 | 3.63E-09    |
| RP3-449M8.6 | BCL2L1   | 0.350862352 | 3.66E-14    |
| RP3-449M8.6 | GGT6     | 0.322685829 | 4.27E-12    |
| RP3-449M8.6 | DPYSL3   | 0.324324758 | 3.28E-12    |



|             |          |             |             |
|-------------|----------|-------------|-------------|
| RP3-449M8.6 | FYN      | 0.439877027 | 3.37E-22    |
| RP3-449M8.6 | TK1      | 0.127285112 | 0.007580959 |
| RP3-449M8.6 | AK1      | 0.12711583  | 0.007662187 |
| RP3-449M8.6 | HIGD1B   | 0.108469985 | 0.023030466 |
| RP3-449M8.6 | TMEM59L  | 0.213722605 | 6.26E-06    |
| RP3-449M8.6 | MEGF9    | 0.636968939 | 2.46E-51    |
| RP3-449M8.6 | ZFP36L1  | 0.546786803 | 1.36E-35    |
| RP3-449M8.6 | ADRA1B   | 0.425018802 | 1.10E-20    |
| RP3-449M8.6 | EPHA4    | 0.570408651 | 2.98E-39    |
| RP3-449M8.6 | TCERG1L  | 0.328323148 | 1.71E-12    |
| RP3-449M8.6 | NGFR     | 0.364070798 | 3.32E-15    |
| RP3-449M8.6 | EBI3     | 0.294171449 | 3.27E-10    |
| RP3-449M8.6 | S100A10  | 0.170256459 | 0.000339289 |
| RP3-449M8.6 | S100B    | 0.304409328 | 7.26E-11    |
| RP3-449M8.6 | CD44     | 0.418232319 | 5.13E-20    |
| RP3-449M8.6 | BHLHE41  | 0.574647384 | 6.11E-40    |
| RP3-449M8.6 | FBX02    | 0.224717469 | 1.98E-06    |
| RP3-449M8.6 | SLC30A2  | 0.179291488 | 0.000159042 |
| RP3-449M8.6 | FRMD5    | 0.438660986 | 4.52E-22    |
| RP3-449M8.6 | SAMD11   | 0.242470733 | 2.71E-07    |
| RP3-449M8.6 | SIPA1L2  | 0.575521526 | 4.40E-40    |
| RP3-449M8.6 | S100A16  | 0.305361268 | 6.30E-11    |
| RP3-449M8.6 | PPL      | 0.564390074 | 2.72E-38    |
| RP3-449M8.6 | ARHGDIB  | 0.083893643 | 0.079113704 |
| RP3-449M8.6 | CDC42EP3 | 0.394245311 | 8.92E-18    |
| RP3-449M8.6 | RUNX2    | 0.554081985 | 1.08E-36    |
| RP3-449M8.6 | LAMC2    | 0.480283178 | 1.03E-26    |
| RP3-449M8.6 | BRINP1   | 0.452998243 | 1.34E-23    |
| RP3-449M8.6 | GPRC5B   | 0.655191117 | 3.49E-55    |
| RP3-449M8.6 | AQP5     | 0.192052579 | 5.12E-05    |
| RP3-449M8.6 | PLAG1    | 0.513668459 | 6.30E-31    |
| RP3-449M8.6 | PTPRU    | 0.425486865 | 9.91E-21    |
| RP3-449M8.6 | ANGPTL4  | 0.271806704 | 7.12E-09    |
| RP3-449M8.6 | PALM3    | 0.335332103 | 5.36E-13    |
| RP3-449M8.6 | ACP5     | 0.194748833 | 3.99E-05    |
| RP3-449M8.6 | DLG4     | 0.46175442  | 1.44E-24    |
| RP3-449M8.6 | ETNK2    | 0.472818145 | 7.80E-26    |
| RP3-449M8.6 | CD109    | 0.537080672 | 3.59E-34    |
| RP3-449M8.6 | SNX22    | 0.452922147 | 1.37E-23    |
| RP3-449M8.6 | TMEM98   | 0.484684386 | 3.04E-27    |
| RP3-449M8.6 | CTHRC1   | 0.220107832 | 3.23E-06    |
| RP3-449M8.6 | S100A2   | 0.281479149 | 1.94E-09    |
| RP3-449M8.6 | C11orf80 | 0.405330312 | 8.66E-19    |
| RP3-449M8.6 | SREBF1   | 0.418561168 | 4.77E-20    |
| RP3-449M8.6 | PRSS22   | 0.458836687 | 3.05E-24    |
| RP3-449M8.6 | CMTM3    | 0.213908838 | 6.14E-06    |
| RP3-449M8.6 | RDH5     | 0.57227076  | 1.49E-39    |
| RP3-449M8.6 | MYH10    | 0.615683434 | 3.72E-47    |
| RP3-449M8.6 | EVPL     | 0.415112397 | 1.03E-19    |
| RP3-449M8.6 | SCD      | 0.448666535 | 3.95E-23    |
| RP3-449M8.6 | CD151    | 0.293769695 | 3.46E-10    |

|             |          |             |             |
|-------------|----------|-------------|-------------|
| RP3-449M8.6 | S100A4   | 0.246291756 | 1.73E-07    |
| RP3-449M8.6 | BNIP1    | 0.441069736 | 2.53E-22    |
| RP3-449M8.6 | MAP3K6   | 0.452239556 | 1.62E-23    |
| RP3-449M8.6 | MANEAL   | 0.362355703 | 4.56E-15    |
| RP3-449M8.6 | CD207    | 0.412204673 | 1.95E-19    |
| RP3-449M8.6 | CD1A     | 0.402303137 | 1.65E-18    |
| RP3-449M8.6 | C3       | 0.308540265 | 3.89E-11    |
| RP3-449M8.6 | NT5E     | 0.419294254 | 4.04E-20    |
| RP3-449M8.6 | CACNG4   | 0.355154455 | 1.70E-14    |
| RP3-449M8.6 | FHOD1    | 0.469147044 | 2.08E-25    |
| RP3-449M8.6 | LEMD1    | 0.47551752  | 3.77E-26    |
| RP3-449M8.6 | ATP11A   | 0.511921167 | 1.08E-30    |
| RP3-449M8.6 | PPAP2C   | 0.250155826 | 1.09E-07    |
| RP3-449M8.6 | DRAM1    | 0.458626201 | 3.22E-24    |
| RP3-449M8.6 | CDA      | 0.163382604 | 0.000589053 |
| RP3-449M8.6 | CCND2    | 0.327616515 | 1.92E-12    |
| RP3-449M8.6 | LCN6     | 0.293329408 | 3.69E-10    |
| RP3-449M8.6 | CDH4     | 0.373705301 | 5.36E-16    |
| RP3-449M8.6 | MMP11    | 0.304982917 | 6.66E-11    |
| RP3-449M8.6 | B3GAT1   | 0.435936152 | 8.65E-22    |
| RP3-449M8.6 | SPP1     | 0.264575348 | 1.82E-08    |
| RP3-449M8.6 | HLA-DQB1 | 0.197229707 | 3.16E-05    |
| RP3-449M8.6 | SDC3     | 0.453994933 | 1.04E-23    |
| RP3-449M8.6 | CX3CL1   | 0.315941755 | 1.24E-11    |
| RP3-449M8.6 | SDK1     | 0.412237712 | 1.94E-19    |
| RP3-449M8.6 | DOCK9    | 0.733108734 | 3.57E-75    |
| RP3-449M8.6 | CSF2     | 0.408998202 | 3.93E-19    |
| RP3-449M8.6 | GRHL3    | 0.523836554 | 2.64E-32    |
| RP3-449M8.6 | TMEM92   | 0.443909112 | 1.27E-22    |
| RP3-449M8.6 | BASP1    | 0.366563374 | 2.08E-15    |
| RP3-449M8.6 | HRH1     | 0.452620389 | 1.47E-23    |
| RP3-449M8.6 | ESM1     | 0.114766988 | 0.016140035 |
| RP3-449M8.6 | B4GALNT3 | 0.470848169 | 1.32E-25    |
| RP3-449M8.6 | LMO3     | 0.390934618 | 1.76E-17    |
| RP3-449M8.6 | C9orf16  | 0.16822606  | 0.000400221 |
| RP3-449M8.6 | SEMA3F   | 0.269485397 | 9.65E-09    |
| RP3-449M8.6 | PLA2G12B | 0.423847323 | 1.44E-20    |
| RP3-449M8.6 | KLK6     | 0.460182474 | 2.16E-24    |
| RP3-449M8.6 | ST3GAL5  | 0.478066688 | 1.89E-26    |
| RP3-449M8.6 | FAM132B  | 0.268761815 | 1.06E-08    |
| RP3-449M8.6 | CDKN1A   | 0.192929984 | 4.72E-05    |
| RP3-449M8.6 | E2F1     | 0.258591521 | 3.88E-08    |
| RP3-449M8.6 | B3GNT8   | 0.238852963 | 4.11E-07    |
| RP3-449M8.6 | MTMR11   | 0.539453253 | 1.63E-34    |
| RP3-449M8.6 | MYO1G    | 0.318511064 | 8.30E-12    |
| RP3-449M8.6 | TMSB10   | 0.176976776 | 0.000193801 |
| RP3-449M8.6 | UNC5CL   | 0.485978437 | 2.12E-27    |
| RP3-449M8.6 | ABR      | 0.456135894 | 6.07E-24    |
| RP3-449M8.6 | PLP2     | 0.261394011 | 2.73E-08    |
| RP3-449M8.6 | SRCIN1   | 0.461887392 | 1.39E-24    |
| RP3-449M8.6 | PDE9A    | 0.410381631 | 2.91E-19    |

|             |          |             |             |
|-------------|----------|-------------|-------------|
| RP3-449M8.6 | TREM2    | 0.13576655  | 0.004375766 |
| RP3-449M8.6 | KDELR3   | 0.273367977 | 5.79E-09    |
| RP3-449M8.6 | PC       | 0.509964027 | 1.95E-30    |
| RP3-449M8.6 | C2CD4A   | 0.496426448 | 1.08E-28    |
| RP3-449M8.6 | PELI1    | 0.50115303  | 2.71E-29    |
| RP3-449M8.6 | SSX1     | 0.280711881 | 2.16E-09    |
| RP3-449M8.6 | MROH6    | 0.405591789 | 8.19E-19    |
| RP3-449M8.6 | ESPN     | 0.429198389 | 4.21E-21    |
| RP3-449M8.6 | BMP1     | 0.492971436 | 2.92E-28    |
| RP3-449M8.6 | TM4SF4   | 0.455503978 | 7.12E-24    |
| RP3-449M8.6 | CORO2A   | 0.630474215 | 5.03E-50    |
| RP3-449M8.6 | CD164L2  | 0.333732723 | 7.00E-13    |
| RP3-449M8.6 | CTSS     | 0.3341823   | 6.50E-13    |
| RP3-449M8.6 | CLU      | 0.409240551 | 3.73E-19    |
| RP3-449M8.6 | TMSB4X   | 0.216731256 | 4.59E-06    |
| RP3-449M8.6 | WNT10A   | 0.394998551 | 7.63E-18    |
| RP3-449M8.6 | NAPSA    | 0.278732259 | 2.82E-09    |
| RP3-449M8.6 | PLEKHA4  | 0.499115468 | 4.93E-29    |
| RP3-449M8.6 | SFPA1    | 0.137250731 | 0.003962022 |
| RP3-449M8.6 | C1orf116 | 0.512103924 | 1.02E-30    |
| RP3-449M8.6 | TM4SF1   | 0.328694052 | 1.61E-12    |
| RP3-449M8.6 | SEL1L3   | 0.494989921 | 1.63E-28    |
| RP3-449M8.6 | VASN     | 0.425263613 | 1.04E-20    |
| RP3-449M8.6 | NPTXR    | 0.557090919 | 3.75E-37    |
| RP3-449M8.6 | PDE4C    | 0.414365128 | 1.21E-19    |
| RP3-449M8.6 | CDC42EP1 | 0.419889615 | 3.54E-20    |
| RP3-449M8.6 | ENDOD1   | 0.632579079 | 1.91E-50    |
| RP3-449M8.6 | RYR1     | 0.380458524 | 1.44E-16    |
| RP3-449M8.6 | IL1RAP   | 0.638041441 | 1.49E-51    |
| RP3-449M8.6 | SLC35F2  | 0.597840763 | 6.86E-44    |
| RP3-449M8.6 | ISYNA1   | 0.28394123  | 1.38E-09    |
| RP3-449M8.6 | HLA-G    | 0.30340427  | 8.44E-11    |
| RP3-449M8.6 | CDKN2B   | 0.409783149 | 3.31E-19    |
| RP3-449M8.6 | ALDH1A3  | 0.351982228 | 3.00E-14    |
| RP3-449M8.6 | CLIP3    | 0.368372152 | 1.48E-15    |
| RP3-449M8.6 | ULBP2    | 0.380554193 | 1.41E-16    |
| RP3-449M8.6 | ETHE1    | 0.414427607 | 1.20E-19    |
| RP3-449M8.6 | XPR1     | 0.501990933 | 2.12E-29    |
| RP3-449M8.6 | SPTBN2   | 0.603463097 | 6.75E-45    |
| RP3-449M8.6 | IVL      | 0.422627683 | 1.90E-20    |
| RP3-449M8.6 | MARCO    | 0.264222599 | 1.90E-08    |
| RP3-449M8.6 | PLXND1   | 0.357940737 | 1.03E-14    |
| RP3-449M8.6 | EMILIN2  | 0.403388278 | 1.31E-18    |
| RP3-449M8.6 | PLAUR    | 0.336860895 | 4.14E-13    |
| RP3-449M8.6 | CDC42EP5 | 0.318174485 | 8.75E-12    |
| RP3-449M8.6 | TRPC5    | 0.563799369 | 3.37E-38    |
| RP3-449M8.6 | TMEM100  | 0.326121338 | 2.45E-12    |
| RP3-449M8.6 | QSOX1    | 0.498248417 | 6.35E-29    |
| RP3-449M8.6 | ARHGAP23 | 0.545268365 | 2.29E-35    |
| RP3-449M8.6 | MDFI     | 0.248661784 | 1.30E-07    |
| RP3-449M8.6 | FSTL3    | 0.41014767  | 3.06E-19    |

|             |           |             |             |
|-------------|-----------|-------------|-------------|
| RP3-449M8.6 | INF2      | 0.494545828 | 1.86E-28    |
| RP3-449M8.6 | TGFBR1    | 0.652445503 | 1.38E-54    |
| RP3-449M8.6 | TGFBI     | 0.263645747 | 2.05E-08    |
| RP3-449M8.6 | ERBB3     | 0.574634902 | 6.14E-40    |
| RP3-449M8.6 | CCL18     | 0.278537233 | 2.90E-09    |
| RP3-449M8.6 | CCL17     | 0.303512219 | 8.30E-11    |
| RP3-449M8.6 | C16orf45  | 0.40960798  | 3.44E-19    |
| RP3-449M8.6 | PRDM1     | 0.474365589 | 5.15E-26    |
| RP3-449M8.6 | TRIM47    | 0.303213215 | 8.68E-11    |
| RP3-449M8.6 | CNFN      | 0.182697991 | 0.000118368 |
| RP3-449M8.6 | ARMCX3    | 0.590476839 | 1.33E-42    |
| RP3-449M8.6 | RAMP1     | 0.306718083 | 5.13E-11    |
| RP3-449M8.6 | GABRD     | 0.132246577 | 0.005517251 |
| RP3-449M8.6 | COL13A1   | 0.331321018 | 1.05E-12    |
| RP3-449M8.6 | S100A5    | 0.262064972 | 2.51E-08    |
| RP3-449M8.6 | MISP      | 0.270264083 | 8.72E-09    |
| RP3-449M8.6 | HES6      | 0.217867655 | 4.08E-06    |
| RP3-449M8.6 | PSD3      | 0.722805681 | 3.87E-72    |
| RP3-449M8.6 | DOK7      | 0.422423324 | 1.99E-20    |
| RP3-449M8.6 | ZMAT3     | 0.484572689 | 3.14E-27    |
| RP3-449M8.6 | MFAP2     | 0.34032931  | 2.30E-13    |
| RP3-449M8.6 | TMEM79    | 0.470696828 | 1.38E-25    |
| RP3-449M8.6 | SLC1A5    | 0.340666883 | 2.17E-13    |
| RP3-449M8.6 | BBC3      | 0.226803469 | 1.58E-06    |
| RP3-449M8.6 | HLA-DQB2  | 0.225858691 | 1.75E-06    |
| RP3-449M8.6 | C1QL1     | 0.424925048 | 1.13E-20    |
| RP3-449M8.6 | TMEM215   | 0.368620941 | 1.41E-15    |
| RP3-449M8.6 | PNP       | 0.417543061 | 5.98E-20    |
| RP3-449M8.6 | ARNTL     | 0.596408683 | 1.23E-43    |
| RP3-449M8.6 | CLDN2     | 0.376317317 | 3.23E-16    |
| RP3-449M8.6 | MVP       | 0.366615357 | 2.06E-15    |
| RP3-449M8.6 | LGALS1    | 0.180229244 | 0.0001467   |
| RP3-449M8.6 | BIRC7     | 0.367325158 | 1.80E-15    |
| RP3-449M8.6 | COL8A1    | 0.661732577 | 1.25E-56    |
| RP3-449M8.6 | PERP      | 0.483892083 | 3.79E-27    |
| RP3-449M8.6 | GJA4      | 0.255291608 | 5.83E-08    |
| RP3-449M8.6 | IGFL2     | 0.372015225 | 7.41E-16    |
| RP3-449M8.6 | DAPK2     | 0.508049437 | 3.48E-30    |
| RP3-449M8.6 | MAMLD1    | 0.627365782 | 2.08E-49    |
| RP3-449M8.6 | ETV5      | 0.455253809 | 7.59E-24    |
| RP3-449M8.6 | RUNX1     | 0.533782886 | 1.07E-33    |
| RP3-449M8.6 | LONRF2    | 0.575067647 | 5.22E-40    |
| RP3-449M8.6 | SPOCK1    | 0.305965636 | 5.75E-11    |
| RP3-449M8.6 | XKRX      | 0.544359827 | 3.12E-35    |
| RP3-449M8.6 | TGFB1     | 0.252353593 | 8.35E-08    |
| RP3-449M8.6 | ERP27     | 0.321660346 | 5.03E-12    |
| RP3-449M8.6 | TNFRSF10C | 0.412722582 | 1.74E-19    |
| RP3-449M8.6 | PALM      | 0.459365881 | 2.66E-24    |
| RP3-449M8.6 | TSC22D1   | 0.499611756 | 4.26E-29    |
| RP3-449M8.6 | TGM2      | 0.355696447 | 1.54E-14    |
| RP3-449M8.6 | UBE2QL1   | 0.423816094 | 1.45E-20    |

|             |          |             |             |
|-------------|----------|-------------|-------------|
| RP3-449M8.6 | ECE1     | 0.557733938 | 2.98E-37    |
| RP3-449M8.6 | COL8A2   | 0.516499104 | 2.63E-31    |
| RP3-449M8.6 | HIST3H2A | 0.295046017 | 2.88E-10    |
| RP3-449M8.6 | TNFRSF21 | 0.491920564 | 3.94E-28    |
| RP3-449M8.6 | SOX4     | 0.474116452 | 5.51E-26    |
| RP3-449M8.6 | ELF3     | 0.470927881 | 1.29E-25    |
| RP3-449M8.6 | TPD52L1  | 0.520253038 | 8.17E-32    |
| RP3-449M8.6 | INHBB    | 0.495511598 | 1.41E-28    |
| RP3-449M8.6 | HPN      | 0.319924684 | 6.63E-12    |
| RP3-449M8.6 | MMP7     | 0.340363602 | 2.28E-13    |
| RP3-449M8.6 | RAB27A   | 0.652633721 | 1.26E-54    |
| RP3-449M8.6 | IGF2BP2  | 0.587639599 | 4.10E-42    |
| RP3-449M8.6 | ITGB4    | 0.411913969 | 2.08E-19    |
| RP3-449M8.6 | PPP1R1B  | 0.41397465  | 1.32E-19    |
| RP3-449M8.6 | NPDC1    | 0.18758258  | 7.68E-05    |
| RP3-449M8.6 | CCL13    | 0.385529695 | 5.25E-17    |
| RP3-449M8.6 | SPINT1   | 0.471563737 | 1.09E-25    |
| RP3-449M8.6 | HEY2     | 0.456958479 | 4.92E-24    |
| RP3-449M8.6 | CST2     | 0.327627375 | 1.92E-12    |
| RP3-449M8.6 | ADM      | 0.389807226 | 2.21E-17    |
| RP3-449M8.6 | VSTM2L   | 0.223152863 | 2.34E-06    |
| RP3-449M8.6 | FAM84A   | 0.389984026 | 2.14E-17    |
| RP3-449M8.6 | P4HA2    | 0.418141968 | 5.23E-20    |
| RP3-449M8.6 | LPL      | 0.380948288 | 1.31E-16    |
| RP3-449M8.6 | TMEM173  | 0.307127354 | 4.82E-11    |
| RP3-449M8.6 | DHRS3    | 0.400156943 | 2.60E-18    |
| RP3-449M8.6 | SCN1B    | 0.316705051 | 1.10E-11    |
| RP3-449M8.6 | GLT1D1   | 0.419973654 | 3.47E-20    |
| RP3-449M8.6 | PHYHIP   | 0.40568299  | 8.03E-19    |
| RP3-449M8.6 | BHLHE40  | 0.564391988 | 2.72E-38    |
| RP3-449M8.6 | BID      | 0.39840497  | 3.76E-18    |
| RP3-449M8.6 | POSTN    | 0.270065724 | 8.95E-09    |
| RP3-449M8.6 | ITGA3    | 0.547298693 | 1.14E-35    |
| RP3-449M8.6 | RSPO4    | 0.446146302 | 7.35E-23    |
| RP3-449M8.6 | ADAMTS9  | 0.504937104 | 8.84E-30    |
| RP3-449M8.6 | ABTB2    | 0.653097174 | 9.97E-55    |
| RP3-449M8.6 | KCNQ3    | 0.630282593 | 5.49E-50    |
| RP3-449M8.6 | ANXA1    | 0.557934354 | 2.78E-37    |
| RP3-449M8.6 | S100A11  | 0.260192083 | 3.17E-08    |
| RP3-449M8.6 | CEACAM6  | 0.373286981 | 5.81E-16    |
| RP3-449M8.6 | IER5L    | 0.375562517 | 3.74E-16    |
| RP3-449M8.6 | KRT80    | 0.490354114 | 6.16E-28    |
| RP3-449M8.6 | CDH6     | 0.38033314  | 1.47E-16    |
| RP3-449M8.6 | UNC5B    | 0.415648896 | 9.12E-20    |
| RP3-449M8.6 | PLEKHN1  | 0.491042096 | 5.07E-28    |
| RP3-449M8.6 | SYTL1    | 0.210791611 | 8.42E-06    |
| RP3-449M8.6 | TMEM163  | 0.381104947 | 1.27E-16    |
| RP3-449M8.6 | C4orf48  | 0.055354726 | 0.247112601 |
| RP3-449M8.6 | B3GNT7   | 0.481898916 | 6.59E-27    |
| RP3-449M8.6 | BAIAP3   | 0.477022128 | 2.51E-26    |
| RP3-449M8.6 | PHLDA2   | 0.294753478 | 3.00E-10    |

|             |            |             |             |
|-------------|------------|-------------|-------------|
| RP3-449M8.6 | GAP43      | 0.426443093 | 7.96E-21    |
| RP3-449M8.6 | S100A1     | 0.24111328  | 3.17E-07    |
| RP3-449M8.6 | PTPRE      | 0.654926023 | 3.99E-55    |
| RP3-449M8.6 | CCND1      | 0.436625764 | 7.34E-22    |
| RP3-449M8.6 | ST6GALNAC5 | 0.456273729 | 5.86E-24    |
| RP3-449M8.6 | KRT17      | 0.256811323 | 4.84E-08    |
| RP3-449M8.6 | HPCAL4     | 0.494145564 | 2.08E-28    |
| RP3-449M8.6 | GABBR2     | 0.44430639  | 1.15E-22    |
| RP3-449M8.6 | DIRAS3     | 0.407228165 | 5.76E-19    |
| RP3-449M8.6 | SERINC2    | 0.296356593 | 2.38E-10    |
| RP3-449M8.6 | PTCHD4     | 0.356523287 | 1.33E-14    |
| RP3-449M8.6 | EPS8       | 0.697891129 | 2.44E-65    |
| RP3-449M8.6 | LY6E       | 0.37096373  | 9.06E-16    |
| RP3-449M8.6 | UPP1       | 0.404047749 | 1.14E-18    |
| RP3-449M8.6 | AHNAK2     | 0.498119487 | 6.60E-29    |
| RP3-449M8.6 | PLXNC1     | 0.580473346 | 6.66E-41    |
| RP3-449M8.6 | TNC        | 0.413440137 | 1.49E-19    |
| RP3-449M8.6 | DUSP4      | 0.45604526  | 6.21E-24    |
| RP3-449M8.6 | NRCAM      | 0.638836439 | 1.02E-51    |
| RP3-449M8.6 | NRP2       | 0.586237113 | 7.11E-42    |
| RP3-449M8.6 | CTSC       | 0.469323844 | 1.98E-25    |
| RP3-449M8.6 | AMIGO2     | 0.508550406 | 2.99E-30    |
| RP3-449M8.6 | NAB2       | 0.463057478 | 1.03E-24    |
| RP3-449M8.6 | TBC1D2     | 0.551339989 | 2.83E-36    |
| RP3-449M8.6 | PHLDA3     | 0.179092632 | 0.000161782 |
| RP3-449M8.6 | PTP4A3     | 0.248904751 | 1.27E-07    |
| RP3-449M8.6 | CRABP2     | 0.218486562 | 3.82E-06    |
| RP3-449M8.6 | GOS2       | 0.314599691 | 1.53E-11    |
| RP3-449M8.6 | S100A6     | 0.30211809  | 1.02E-10    |
| RP3-449M8.6 | FOXQ1      | 0.50128118  | 2.61E-29    |
| RP3-449M8.6 | LRG1       | 0.480674507 | 9.23E-27    |
| RP3-449M8.6 | LAMP5      | 0.258679744 | 3.83E-08    |
| RP3-449M8.6 | ALDH3B1    | 0.411057981 | 2.51E-19    |
| RP3-449M8.6 | CDH2       | 0.186799143 | 8.24E-05    |
| RP3-449M8.6 | SCG5       | 0.294221092 | 3.24E-10    |
| RP3-449M8.6 | ZCCHC16    | 0.539466403 | 1.62E-34    |
| RP3-449M8.6 | GRB7       | 0.547267844 | 1.15E-35    |
| RP3-449M8.6 | TIAM1      | 0.476508323 | 2.88E-26    |
| RP3-449M8.6 | FXYD5      | 0.166039002 | 0.000477158 |
| RP3-449M8.6 | CLDN9      | 0.315071654 | 1.42E-11    |
| RP3-449M8.6 | FAM43A     | 0.531446048 | 2.29E-33    |
| RP3-449M8.6 | CHST2      | 0.436428327 | 7.70E-22    |
| RP3-449M8.6 | HMGA2      | 0.442803696 | 1.66E-22    |
| RP3-449M8.6 | GALNT7     | 0.665010434 | 2.27E-57    |
| RP3-449M8.6 | CBLN1      | 0.348964925 | 5.12E-14    |
| RP3-449M8.6 | STRA6      | 0.423522916 | 1.55E-20    |
| RP3-449M8.6 | MUC21      | 0.499239657 | 4.76E-29    |
| RP3-449M8.6 | PRR36      | 0.468677918 | 2.35E-25    |
| RP3-449M8.6 | NFE2L3     | 0.339842383 | 2.50E-13    |
| RP3-449M8.6 | NR1D1      | 0.382312336 | 9.97E-17    |
| RP3-449M8.6 | MUC1       | 0.369386217 | 1.22E-15    |

|             |          |             |          |
|-------------|----------|-------------|----------|
| RP3-449M8.6 | NAT8L    | 0.36945359  | 1.21E-15 |
| RP3-449M8.6 | APOC1    | 0.184899943 | 9.75E-05 |
| RP3-449M8.6 | EVA1A    | 0.464338622 | 7.35E-25 |
| RP3-449M8.6 | ENTPD1   | 0.479551865 | 1.26E-26 |
| RP3-449M8.6 | COL1A1   | 0.313673069 | 1.77E-11 |
| RP3-449M8.6 | FNDC4    | 0.317880314 | 9.17E-12 |
| RP3-449M8.6 | FRMD3    | 0.453880754 | 1.07E-23 |
| RP3-449M8.6 | SHROOM4  | 0.694879642 | 1.45E-64 |
| RP3-449M8.6 | NELL2    | 0.44014595  | 3.16E-22 |
| RP3-449M8.6 | EPHB3    | 0.482049476 | 6.32E-27 |
| RP3-449M8.6 | TMC6     | 0.441077112 | 2.53E-22 |
| RP3-449M8.6 | NOD1     | 0.632346608 | 2.12E-50 |
| RP3-449M8.6 | GGCT     | 0.505195461 | 8.18E-30 |
| RP3-449M8.6 | ICAM1    | 0.613412833 | 9.95E-47 |
| RP3-449M8.6 | PRSS23   | 0.464033105 | 7.96E-25 |
| RP3-449M8.6 | CFI      | 0.464434149 | 7.17E-25 |
| RP3-449M8.6 | CD55     | 0.504524287 | 1.00E-29 |
| RP3-449M8.6 | RASD2    | 0.501108564 | 2.75E-29 |
| RP3-449M8.6 | KLK11    | 0.436664407 | 7.28E-22 |
| RP3-449M8.6 | ICAM5    | 0.583914884 | 1.76E-41 |
| RP3-449M8.6 | ADORA1   | 0.399653846 | 2.89E-18 |
| RP3-449M8.6 | ITGA2    | 0.553136782 | 1.51E-36 |
| RP3-449M8.6 | ABCC3    | 0.547240824 | 1.17E-35 |
| RP3-449M8.6 | MFGE8    | 0.491345556 | 4.65E-28 |
| RP3-449M8.6 | STK32A   | 0.503997858 | 1.17E-29 |
| RP3-449M8.6 | CYSLTR2  | 0.507024876 | 4.73E-30 |
| RP3-449M8.6 | LAD1     | 0.514431472 | 4.99E-31 |
| RP3-449M8.6 | MGAT3    | 0.458621449 | 3.22E-24 |
| RP3-449M8.6 | IGFBP6   | 0.310414289 | 2.92E-11 |
| RP3-449M8.6 | CYP2S1   | 0.402024158 | 1.75E-18 |
| RP3-449M8.6 | KCNJ2    | 0.439095575 | 4.07E-22 |
| RP3-449M8.6 | FAM20A   | 0.375833781 | 3.55E-16 |
| RP3-449M8.6 | TGFA     | 0.605387047 | 3.02E-45 |
| RP3-449M8.6 | MXRA8    | 0.391186379 | 1.67E-17 |
| RP3-449M8.6 | C8orf4   | 0.340803543 | 2.12E-13 |
| RP3-449M8.6 | CLDN10   | 0.443216804 | 1.50E-22 |
| RP3-449M8.6 | PDE5A    | 0.70414934  | 5.58E-67 |
| RP3-449M8.6 | APOE     | 0.246156656 | 1.76E-07 |
| RP3-449M8.6 | SPOCK2   | 0.427804697 | 5.81E-21 |
| RP3-449M8.6 | TENM1    | 0.487450211 | 1.40E-27 |
| RP3-449M8.6 | SLIT1    | 0.307300041 | 4.70E-11 |
| RP3-449M8.6 | CXCL14   | 0.257961481 | 4.19E-08 |
| RP3-449M8.6 | ECM1     | 0.199044301 | 2.66E-05 |
| RP3-449M8.6 | DUSP5    | 0.509018611 | 2.60E-30 |
| RP3-449M8.6 | SEZ6L2   | 0.350424217 | 3.96E-14 |
| RP3-449M8.6 | THRSP    | 0.282964823 | 1.58E-09 |
| RP3-449M8.6 | C19orf33 | 0.249242891 | 1.22E-07 |
| RP3-449M8.6 | MPZL2    | 0.615619678 | 3.83E-47 |
| RP3-449M8.6 | CTSH     | 0.476790792 | 2.67E-26 |
| RP3-449M8.6 | CYP1B1   | 0.61772135  | 1.53E-47 |
| RP3-449M8.6 | ALOX5    | 0.392968351 | 1.16E-17 |

|             |           |             |             |
|-------------|-----------|-------------|-------------|
| RP3-449M8.6 | SYTL5     | 0.541524272 | 8.13E-35    |
| RP3-449M8.6 | TNFRSF12A | 0.400553165 | 2.39E-18    |
| RP3-449M8.6 | DUSP6     | 0.492014531 | 3.84E-28    |
| RP3-449M8.6 | ALOX15B   | 0.467441098 | 3.26E-25    |
| RP3-449M8.6 | SDC4      | 0.589234629 | 2.18E-42    |
| RP3-449M8.6 | MDK       | 0.413712251 | 1.40E-19    |
| RP3-449M8.6 | KRT19     | 0.356220677 | 1.40E-14    |
| RP3-449M8.6 | MET       | 0.656330849 | 1.97E-55    |
| RP3-449M8.6 | TESC      | 0.345062843 | 1.01E-13    |
| RP3-449M8.6 | CXCL17    | 0.49401963  | 2.16E-28    |
| RP3-449M8.6 | NPC2      | 0.374805745 | 4.33E-16    |
| RP3-449M8.6 | COMP      | 0.316350104 | 1.17E-11    |
| RP3-449M8.6 | TUSC3     | 0.455054811 | 7.98E-24    |
| RP3-449M8.6 | TMPRSS4   | 0.466183995 | 4.54E-25    |
| RP3-449M8.6 | LGALS3    | 0.389623901 | 2.30E-17    |
| RP3-449M8.6 | CRLF1     | 0.248244854 | 1.37E-07    |
| RP3-449M8.6 | CTXN1     | 0.352055912 | 2.96E-14    |
| RP3-449M8.6 | PCSK1N    | 0.110507688 | 0.020564339 |
| RP3-449M8.6 | NMU       | 0.36564971  | 2.47E-15    |
| RP3-449M8.6 | GALE      | 0.381367559 | 1.20E-16    |
| RP3-449M8.6 | PCSK2     | 0.253480348 | 7.28E-08    |
| RP3-449M8.6 | GJB3      | 0.494066632 | 2.13E-28    |
| RP3-449M8.6 | SLPI      | 0.280153822 | 2.33E-09    |
| RP3-449M8.6 | AGR2      | 0.254391297 | 6.52E-08    |
| RP3-449M8.6 | MRC2      | 0.398679921 | 3.55E-18    |
| RP3-449M8.6 | GOLT1A    | 0.348551896 | 5.51E-14    |
| RP3-449M8.6 | SLC27A6   | 0.542262854 | 6.34E-35    |
| RP3-449M8.6 | KCNN4     | 0.367460352 | 1.76E-15    |
| RP3-449M8.6 | ETV4      | 0.374657255 | 4.46E-16    |
| RP3-449M8.6 | SYT12     | 0.546481853 | 1.51E-35    |
| RP3-449M8.6 | PVRL4     | 0.552425114 | 1.94E-36    |
| RP3-449M8.6 | PLCD3     | 0.523210697 | 3.22E-32    |
| RP3-449M8.6 | PLAU      | 0.407419574 | 5.53E-19    |
| RP3-449M8.6 | LRRK2     | 0.494676957 | 1.79E-28    |
| RP3-449M8.6 | SFN       | 0.369687834 | 1.15E-15    |
| RP3-449M8.6 | LPAR5     | 0.611285701 | 2.48E-46    |
| RP3-449M8.6 | NGEF      | 0.473973693 | 5.72E-26    |
| RP3-449M8.6 | DTX4      | 0.620707094 | 4.11E-48    |
| RP3-449M8.6 | CST6      | 0.389210091 | 2.50E-17    |
| RP3-449M8.6 | QPCT      | 0.483684363 | 4.02E-27    |
| RP3-449M8.6 | TIMP1     | 0.329372459 | 1.44E-12    |
| RP3-449M8.6 | CAMK2N1   | 0.533809126 | 1.06E-33    |
| RP3-449M8.6 | KLHDC8A   | 0.314588344 | 1.53E-11    |
| RP3-449M8.6 | PDLIM4    | 0.470419537 | 1.48E-25    |
| RP3-449M8.6 | SCEL      | 0.568039899 | 7.16E-39    |
| RP3-449M8.6 | LCN2      | 0.408954678 | 3.96E-19    |
| RP3-449M8.6 | PROS1     | 0.633843273 | 1.06E-50    |
| RP3-449M8.6 | GABRB2    | 0.648523209 | 9.59E-54    |
| RP3-449M8.6 | TMPRSS6   | 0.477873151 | 1.99E-26    |
| RP3-449M8.6 | KLK7      | 0.503276055 | 1.45E-29    |
| RP3-449M8.6 | PDZK1IP1  | 0.330079659 | 1.28E-12    |



|              |          |              |            |
|--------------|----------|--------------|------------|
| RP3-449M8.6  | CDH3     | 0.508537144  | 3.00E-30   |
| RP3-449M8.6  | LRP4     | 0.521112216  | 6.24E-32   |
| RP3-449M8.6  | IGSF1    | 0.329939737  | 1.31E-12   |
| RP3-449M8.6  | B3GNT3   | 0.439975959  | 3.29E-22   |
| RP3-449M8.6  | CLDN1    | 0.536393754  | 4.51E-34   |
| RP3-449M8.6  | GDF15    | 0.433783844  | 1.44E-21   |
| RP3-449M8.6  | ARHGAP36 | 0.323854882  | 3.54E-12   |
| RP3-449M8.6  | LAMB3    | 0.451730219  | 1.84E-23   |
| RP3-449M8.6  | KLK10    | 0.501165299  | 2.70E-29   |
| RP3-449M8.6  | DPP4     | 0.59838107   | 5.50E-44   |
| RP3-449M8.6  | METTL7B  | 0.430203022  | 3.33E-21   |
| RP3-449M8.6  | LIPH     | 0.52082996   | 6.82E-32   |
| RP3-449M8.6  | CLDN16   | 0.559474564  | 1.60E-37   |
| RP3-449M8.6  | CHI3L1   | 0.47440658   | 5.09E-26   |
| RP3-449M8.6  | SLC22A31 | 0.407181786  | 5.82E-19   |
| RP3-449M8.6  | TACSTD2  | 0.55092391   | 3.27E-36   |
| RP3-449M8.6  | SFTPB    | 0.45127868   | 2.06E-23   |
| RP3-449M8.6  | RXRG     | 0.467430814  | 3.27E-25   |
| RP3-449M8.6  | DCSTAMP  | 0.569415291  | 4.31E-39   |
| RP3-449M8.6  | CITED1   | 0.427149764  | 6.76E-21   |
| RP3-449M8.6  | SERPINA1 | 0.469976792  | 1.67E-25   |
| RP3-449M8.6  | PRR15    | 0.430539176  | 3.08E-21   |
| RP3-449M8.6  | SLC34A2  | 0.629411074  | 8.18E-50   |
| RP3-449M8.6  | FN1      | 0.579241774  | 1.07E-40   |
| RP3-449M8.6  | ZCCHC12  | 0.439232377  | 3.94E-22   |
| RP11-44N11.3 | TFF3     | -0.349581103 | 4.59E-14   |
| RP11-44N11.3 | CCL21    | -0.258714457 | 3.82E-08   |
| RP11-44N11.3 | TPO      | -0.424216265 | 1.33E-20   |
| RP11-44N11.3 | MT1G     | -0.403631036 | 1.25E-18   |
| RP11-44N11.3 | DIO1     | -0.32260954  | 4.32E-12   |
| RP11-44N11.3 | DPT      | -0.241324373 | 3.09E-07   |
| RP11-44N11.3 | CDH16    | -0.406614417 | 6.57E-19   |
| RP11-44N11.3 | CRABP1   | -0.46015007  | 2.17E-24   |
| RP11-44N11.3 | SLC26A7  | -0.452503562 | 1.52E-23   |
| RP11-44N11.3 | MT1H     | -0.420063875 | 3.40E-20   |
| RP11-44N11.3 | SLC26A4  | -0.453055047 | 1.32E-23   |
| RP11-44N11.3 | SLC5A8   | -0.411908085 | 2.08E-19   |
| RP11-44N11.3 | PKHD1L1  | -0.336036718 | 4.76E-13   |
| RP11-44N11.3 | TFCP2L1  | -0.449892519 | 2.91E-23   |
| RP11-44N11.3 | WSCD2    | -0.348619492 | 5.44E-14   |
| RP11-44N11.3 | IPCEF1   | -0.367818549 | 1.64E-15   |
| RP11-44N11.3 | SLC5A5   | -0.307479761 | 4.57E-11   |
| RP11-44N11.3 | MT1F     | -0.377566275 | 2.54E-16   |
| RP11-44N11.3 | FOSB     | -0.158644578 | 0.00085102 |
| RP11-44N11.3 | SEMA3D   | -0.320164748 | 6.39E-12   |
| RP11-44N11.3 | BMP8A    | -0.318501487 | 8.31E-12   |
| RP11-44N11.3 | MATN2    | -0.458755429 | 3.11E-24   |
| RP11-44N11.3 | PLA2R1   | -0.279418246 | 2.57E-09   |
| RP11-44N11.3 | COL23A1  | -0.528590912 | 5.77E-33   |
| RP11-44N11.3 | HGD      | -0.45300058  | 1.34E-23   |
| RP11-44N11.3 | TCEAL2   | -0.353058381 | 2.48E-14   |

|              |            |              |             |
|--------------|------------|--------------|-------------|
| RP11-44N11.3 | CHRD1      | -0.162713417 | 0.00062085  |
| RP11-44N11.3 | TNFRSF11B  | -0.301576513 | 1.11E-10    |
| RP11-44N11.3 | FAM167A    | -0.39098461  | 1.74E-17    |
| RP11-44N11.3 | KIT        | -0.286058194 | 1.03E-09    |
| RP11-44N11.3 | SLC4A4     | -0.490107524 | 6.61E-28    |
| RP11-44N11.3 | SMOC2      | -0.190058092 | 6.14E-05    |
| RP11-44N11.3 | FHL1       | -0.376990109 | 2.84E-16    |
| RP11-44N11.3 | OTOS       | -0.41334557  | 1.52E-19    |
| RP11-44N11.3 | IGFBPL1    | -0.409951754 | 3.19E-19    |
| RP11-44N11.3 | HBB        | -0.26122548  | 2.79E-08    |
| RP11-44N11.3 | BEX1       | -0.374184173 | 4.89E-16    |
| RP11-44N11.3 | FABP4      | -0.381884026 | 1.09E-16    |
| RP11-44N11.3 | LMOD1      | -0.379006263 | 1.91E-16    |
| RP11-44N11.3 | SOD3       | -0.399013483 | 3.31E-18    |
| RP11-44N11.3 | TMEM171    | -0.354755247 | 1.83E-14    |
| RP11-44N11.3 | PI16       | -0.178509104 | 0.000170078 |
| RP11-44N11.3 | ZMAT4      | -0.381250895 | 1.23E-16    |
| RP11-44N11.3 | MFAP4      | -0.215503142 | 5.21E-06    |
| RP11-44N11.3 | CWH43      | -0.417285341 | 6.34E-20    |
| RP11-44N11.3 | SPX        | -0.473086239 | 7.26E-26    |
| RP11-44N11.3 | APOD       | -0.083701191 | 0.07980653  |
| RP11-44N11.3 | DPP6       | -0.375122038 | 4.08E-16    |
| RP11-44N11.3 | MMRN1      | -0.312801815 | 2.03E-11    |
| RP11-44N11.3 | WDR72      | -0.459951873 | 2.29E-24    |
| RP11-44N11.3 | MPPED2     | -0.457360546 | 4.44E-24    |
| RP11-44N11.3 | PAPSS2     | -0.351230168 | 3.43E-14    |
| RP11-44N11.3 | DCN        | -0.113061104 | 0.017800498 |
| RP11-44N11.3 | SORBS2     | -0.371106751 | 8.81E-16    |
| RP11-44N11.3 | EGR2       | -0.086741025 | 0.069421305 |
| RP11-44N11.3 | EDN3       | -0.360494565 | 6.43E-15    |
| RP11-44N11.3 | DIO2       | -0.472474329 | 8.56E-26    |
| RP11-44N11.3 | ITPR1      | -0.400806803 | 2.27E-18    |
| RP11-44N11.3 | CFD        | -0.194291534 | 4.16E-05    |
| RP11-44N11.3 | CPXM1      | -0.261356827 | 2.74E-08    |
| RP11-44N11.3 | ELMO1      | -0.442557115 | 1.77E-22    |
| RP11-44N11.3 | GPC3       | -0.301332837 | 1.15E-10    |
| RP11-44N11.3 | MYOC       | -0.156002868 | 0.001040267 |
| RP11-44N11.3 | DEPTOR     | -0.361251792 | 5.59E-15    |
| RP11-44N11.3 | DGKI       | -0.269332367 | 9.85E-09    |
| RP11-44N11.3 | CARTPT     | -0.337060323 | 4.00E-13    |
| RP11-44N11.3 | IYD        | -0.495090748 | 1.59E-28    |
| RP11-44N11.3 | LYVE1      | -0.259497834 | 3.46E-08    |
| RP11-44N11.3 | CLCNKB     | -0.406672998 | 6.49E-19    |
| RP11-44N11.3 | NCAM1      | -0.425345051 | 1.02E-20    |
| RP11-44N11.3 | HBA2       | -0.276293164 | 3.92E-09    |
| RP11-44N11.3 | GLT8D2     | -0.321844582 | 4.89E-12    |
| RP11-44N11.3 | OGDHL      | -0.569393998 | 4.34E-39    |
| RP11-44N11.3 | LIFR       | -0.41543293  | 9.57E-20    |
| RP11-44N11.3 | CSGALNACT1 | -0.185754579 | 9.04E-05    |
| RP11-44N11.3 | RAP1GAP    | -0.452748099 | 1.43E-23    |
| RP11-44N11.3 | COL9A3     | -0.416460014 | 7.62E-20    |

|              |          |              |             |
|--------------|----------|--------------|-------------|
| RP11-44N11.3 | FBLN1    | -0.137686586 | 0.003847431 |
| RP11-44N11.3 | EFEMP1   | -0.246879634 | 1.61E-07    |
| RP11-44N11.3 | AOX1     | -0.301163477 | 1.18E-10    |
| RP11-44N11.3 | GRIN2C   | -0.307310794 | 4.69E-11    |
| RP11-44N11.3 | C11orf74 | -0.445400639 | 8.82E-23    |
| RP11-44N11.3 | PPARGC1A | -0.573222621 | 1.04E-39    |
| RP11-44N11.3 | ANGPTL1  | -0.212248132 | 7.27E-06    |
| RP11-44N11.3 | SCARA5   | -0.175378348 | 0.000221827 |
| RP11-44N11.3 | LTF      | -0.328662401 | 1.62E-12    |
| RP11-44N11.3 | CA4      | -0.357157482 | 1.18E-14    |
| RP11-44N11.3 | TG       | -0.341724285 | 1.81E-13    |
| RP11-44N11.3 | FCGBP    | -0.385755289 | 5.02E-17    |
| RP11-44N11.3 | PBX4     | -0.447988704 | 4.67E-23    |
| RP11-44N11.3 | CYR61    | -0.210000773 | 9.12E-06    |
| RP11-44N11.3 | FOS      | -0.200542833 | 2.31E-05    |
| RP11-44N11.3 | KHDRBS2  | -0.45885174  | 3.04E-24    |
| RP11-44N11.3 | MUM1L1   | -0.340738902 | 2.14E-13    |
| RP11-44N11.3 | RGS16    | -0.444242208 | 1.17E-22    |
| RP11-44N11.3 | MT1M     | -0.347681118 | 6.42E-14    |
| RP11-44N11.3 | LRP2     | -0.313946062 | 1.70E-11    |
| RP11-44N11.3 | MAFB     | -0.366019556 | 2.31E-15    |
| RP11-44N11.3 | KCNK2    | -0.30596201  | 5.75E-11    |
| RP11-44N11.3 | TBC1D4   | -0.385882805 | 4.89E-17    |
| RP11-44N11.3 | MIOX     | -0.420048866 | 3.41E-20    |
| RP11-44N11.3 | TPPP     | -0.455625949 | 6.90E-24    |
| RP11-44N11.3 | FMOD     | -0.339539195 | 2.63E-13    |
| RP11-44N11.3 | CITED2   | -0.320073957 | 6.48E-12    |
| RP11-44N11.3 | RGS8     | -0.347096979 | 7.11E-14    |
| RP11-44N11.3 | ABI3BP   | -0.409684038 | 3.38E-19    |
| RP11-44N11.3 | ADH1B    | -0.211561749 | 7.79E-06    |
| RP11-44N11.3 | OGN      | -0.143941419 | 0.002502273 |
| RP11-44N11.3 | NR4A1    | -0.165762679 | 0.000487802 |
| RP11-44N11.3 | FOXJ1    | -0.376065831 | 3.40E-16    |
| RP11-44N11.3 | ALDH1A1  | -0.432156062 | 2.11E-21    |
| RP11-44N11.3 | OCA2     | -0.215048112 | 5.46E-06    |
| RP11-44N11.3 | TMEM139  | -0.27441942  | 5.04E-09    |
| RP11-44N11.3 | ARHGAP24 | -0.465909983 | 4.87E-25    |
| RP11-44N11.3 | SLC25A15 | -0.396810238 | 5.24E-18    |
| RP11-44N11.3 | DES      | -0.145353978 | 0.002265277 |
| RP11-44N11.3 | GDF10    | -0.209015525 | 1.01E-05    |
| RP11-44N11.3 | KIAA1324 | -0.33329896  | 7.53E-13    |
| RP11-44N11.3 | JUN      | -0.224919664 | 1.93E-06    |
| RP11-44N11.3 | C7       | -0.02540122  | 0.595569222 |
| RP11-44N11.3 | LGI3     | -0.579430374 | 9.94E-41    |
| RP11-44N11.3 | CDON     | -0.461358671 | 1.59E-24    |
| RP11-44N11.3 | BCL2     | -0.357913804 | 1.03E-14    |
| RP11-44N11.3 | HLF      | -0.500058936 | 3.74E-29    |
| RP11-44N11.3 | EGR1     | -0.174505305 | 0.000238692 |
| RP11-44N11.3 | IP6K3    | -0.51702618  | 2.24E-31    |
| RP11-44N11.3 | SCUBE3   | -0.276318979 | 3.91E-09    |
| RP11-44N11.3 | PKNOX2   | -0.222988473 | 2.38E-06    |

|              |          |              |             |
|--------------|----------|--------------|-------------|
| RP11-44N11.3 | SMAD9    | -0.223225351 | 2.32E-06    |
| RP11-44N11.3 | IQGAP2   | -0.485804012 | 2.22E-27    |
| RP11-44N11.3 | GNA14    | -0.400423543 | 2.46E-18    |
| RP11-44N11.3 | LAYN     | -0.275560545 | 4.33E-09    |
| RP11-44N11.3 | AVPR1A   | -0.396983144 | 5.06E-18    |
| RP11-44N11.3 | PDLIM3   | -0.351180381 | 3.46E-14    |
| RP11-44N11.3 | GPM6A    | -0.421900397 | 2.25E-20    |
| RP11-44N11.3 | SDPR     | -0.328555877 | 1.65E-12    |
| RP11-44N11.3 | CRYAB    | -0.360233786 | 6.74E-15    |
| RP11-44N11.3 | FOXA2    | -0.215127827 | 5.42E-06    |
| RP11-44N11.3 | C8orf88  | -0.312018275 | 2.29E-11    |
| RP11-44N11.3 | ISM1     | -0.349103376 | 5.00E-14    |
| RP11-44N11.3 | BMP2     | -0.170175694 | 0.000341537 |
| RP11-44N11.3 | ID4      | -0.277254149 | 3.45E-09    |
| RP11-44N11.3 | NUPR1    | -0.509822973 | 2.04E-30    |
| RP11-44N11.3 | SERTM1   | -0.378689549 | 2.04E-16    |
| RP11-44N11.3 | IRS1     | -0.388683635 | 2.78E-17    |
| RP11-44N11.3 | FIBIN    | -0.224837679 | 1.95E-06    |
| RP11-44N11.3 | PODN     | -0.121212813 | 0.011027439 |
| RP11-44N11.3 | TDRD9    | -0.35249569  | 2.74E-14    |
| RP11-44N11.3 | EPHA3    | -0.208060505 | 1.11E-05    |
| RP11-44N11.3 | AIF1L    | -0.334340371 | 6.33E-13    |
| RP11-44N11.3 | EBF4     | -0.419130206 | 4.19E-20    |
| RP11-44N11.3 | ADM2     | -0.406825479 | 6.28E-19    |
| RP11-44N11.3 | GSTM3    | -0.439945788 | 3.32E-22    |
| RP11-44N11.3 | HSD17B6  | -0.180285828 | 0.000145985 |
| RP11-44N11.3 | AGR3     | -0.24134908  | 3.08E-07    |
| RP11-44N11.3 | EPHB1    | -0.408643905 | 4.24E-19    |
| RP11-44N11.3 | TMOD1    | -0.289723981 | 6.16E-10    |
| RP11-44N11.3 | WASF3    | -0.404931309 | 9.43E-19    |
| RP11-44N11.3 | SELV     | -0.39590355  | 6.33E-18    |
| RP11-44N11.3 | ENPP1    | -0.36943726  | 1.21E-15    |
| RP11-44N11.3 | SYNE1    | -0.34491874  | 1.04E-13    |
| RP11-44N11.3 | PLCH1    | -0.264305172 | 1.88E-08    |
| RP11-44N11.3 | CCDC146  | -0.408907307 | 4.00E-19    |
| RP11-44N11.3 | SLC16A2  | -0.285220896 | 1.16E-09    |
| RP11-44N11.3 | IER2     | -0.291123261 | 5.05E-10    |
| RP11-44N11.3 | KCNAB1   | -0.285417064 | 1.13E-09    |
| RP11-44N11.3 | SYNDIG1  | -0.364672474 | 2.96E-15    |
| RP11-44N11.3 | C16orf89 | -0.501016659 | 2.82E-29    |
| RP11-44N11.3 | CTGF     | -0.099933689 | 0.036338831 |
| RP11-44N11.3 | NR4A3    | -0.109512621 | 0.02173837  |
| RP11-44N11.3 | KIAA1456 | -0.541686838 | 7.70E-35    |
| RP11-44N11.3 | AQP4     | -0.389764052 | 2.23E-17    |
| RP11-44N11.3 | RNF150   | -0.359549252 | 7.64E-15    |
| RP11-44N11.3 | C1S      | -0.084105301 | 0.078357375 |
| RP11-44N11.3 | PFKFB2   | -0.549789328 | 4.84E-36    |
| RP11-44N11.3 | PROX1    | -0.2838019   | 1.41E-09    |
| RP11-44N11.3 | TCF7L1   | -0.343928523 | 1.24E-13    |
| RP11-44N11.3 | HSPB6    | -0.239845647 | 3.67E-07    |
| RP11-44N11.3 | FHDC1    | -0.534470724 | 8.50E-34    |

|              |          |              |             |
|--------------|----------|--------------|-------------|
| RP11-44N11.3 | PRR15L   | -0.527108229 | 9.29E-33    |
| RP11-44N11.3 | SLC1A1   | -0.364214889 | 3.23E-15    |
| RP11-44N11.3 | BTBD11   | -0.455308931 | 7.48E-24    |
| RP11-44N11.3 | TRIM58   | -0.309307516 | 3.46E-11    |
| RP11-44N11.3 | LRIG1    | -0.396367688 | 5.75E-18    |
| RP11-44N11.3 | ROR2     | -0.144707524 | 0.002371071 |
| RP11-44N11.3 | GPR125   | -0.360355203 | 6.59E-15    |
| RP11-44N11.3 | FLRT1    | -0.405196272 | 8.91E-19    |
| RP11-44N11.3 | PGF      | -0.334181649 | 6.50E-13    |
| RP11-44N11.3 | DUSP1    | -0.159319892 | 0.000808037 |
| RP11-44N11.3 | PLA2G7   | -0.172651703 | 0.000278552 |
| RP11-44N11.3 | PLSCR4   | -0.322800177 | 4.19E-12    |
| RP11-44N11.3 | FAM46B   | -0.455846941 | 6.53E-24    |
| RP11-44N11.3 | GLDC     | -0.358920463 | 8.57E-15    |
| RP11-44N11.3 | ZBTB16   | -0.372471279 | 6.79E-16    |
| RP11-44N11.3 | OMD      | -0.118747073 | 0.012783341 |
| RP11-44N11.3 | HSD11B2  | -0.355593822 | 1.57E-14    |
| RP11-44N11.3 | FGL2     | -0.153743907 | 0.001232112 |
| RP11-44N11.3 | CLCNKA   | -0.472904129 | 7.63E-26    |
| RP11-44N11.3 | GATM     | -0.518697514 | 1.33E-31    |
| RP11-44N11.3 | TNS3     | -0.289295048 | 6.55E-10    |
| RP11-44N11.3 | TOB1     | -0.195664857 | 3.66E-05    |
| RP11-44N11.3 | MARC2    | -0.548102959 | 8.66E-36    |
| RP11-44N11.3 | LRRC2    | -0.454835743 | 8.43E-24    |
| RP11-44N11.3 | SORD     | -0.221692597 | 2.73E-06    |
| RP11-44N11.3 | RIMS4    | -0.264806871 | 1.77E-08    |
| RP11-44N11.3 | SLC29A4  | -0.358770818 | 8.81E-15    |
| RP11-44N11.3 | SLC39A14 | -0.517187313 | 2.13E-31    |
| RP11-44N11.3 | FAXDC2   | -0.464949848 | 6.27E-25    |
| RP11-44N11.3 | HSPB8    | -0.295941663 | 2.53E-10    |
| RP11-44N11.3 | CCL19    | -0.001262864 | 0.978950657 |
| RP11-44N11.3 | KCNIP3   | -0.419856725 | 3.56E-20    |
| RP11-44N11.3 | CGNL1    | -0.244889012 | 2.04E-07    |
| RP11-44N11.3 | ATF3     | -0.01609803  | 0.736605943 |
| RP11-44N11.3 | SGCD     | -0.153697241 | 0.001236398 |
| RP11-44N11.3 | STARD13  | -0.262045757 | 2.51E-08    |
| RP11-44N11.3 | LDHD     | -0.54764509  | 1.01E-35    |
| RP11-44N11.3 | RCAN1    | -0.163554753 | 0.000581122 |
| RP11-44N11.3 | ID3      | -0.25689828  | 4.78E-08    |
| RP11-44N11.3 | SYTL3    | -0.473374747 | 6.72E-26    |
| RP11-44N11.3 | MT1E     | -0.316533276 | 1.13E-11    |
| RP11-44N11.3 | CAMK1D   | -0.461034843 | 1.73E-24    |
| RP11-44N11.3 | PRKCQ    | -0.4939787   | 2.19E-28    |
| RP11-44N11.3 | NUAK2    | -0.310521266 | 2.88E-11    |
| RP11-44N11.3 | LIPG     | -0.294684084 | 3.03E-10    |
| RP11-44N11.3 | SLC25A25 | -0.172898368 | 0.000272911 |
| RP11-44N11.3 | PRKX     | -0.117990711 | 0.013369267 |
| RP11-44N11.3 | SRPX     | -0.118264893 | 0.01315419  |
| RP11-44N11.3 | FAM189A1 | -0.362656604 | 4.31E-15    |
| RP11-44N11.3 | PLEKHH1  | -0.355835806 | 1.50E-14    |
| RP11-44N11.3 | WNT11    | -0.330081255 | 1.28E-12    |

|              |          |              |             |
|--------------|----------|--------------|-------------|
| RP11-44N11.3 | SNAI1    | -0.182421414 | 0.000121265 |
| RP11-44N11.3 | FDCSP    | -0.073084674 | 0.126271047 |
| RP11-44N11.3 | MT1X     | -0.388408743 | 2.94E-17    |
| RP11-44N11.3 | ACACB    | -0.495478972 | 1.42E-28    |
| RP11-44N11.3 | ARC      | -0.022172451 | 0.643151585 |
| RP11-44N11.3 | KLK4     | -0.300520993 | 1.29E-10    |
| RP11-44N11.3 | ZFPM2    | -0.082317939 | 0.084931988 |
| RP11-44N11.3 | AKAP12   | -0.095840387 | 0.044752235 |
| RP11-44N11.3 | GJB6     | -0.222995172 | 2.38E-06    |
| RP11-44N11.3 | ERO1LB   | -0.33167486  | 9.86E-13    |
| RP11-44N11.3 | DNALI1   | -0.368022945 | 1.58E-15    |
| RP11-44N11.3 | HKDC1    | -0.242871013 | 2.58E-07    |
| RP11-44N11.3 | ZFP36L2  | -0.270342714 | 8.63E-09    |
| RP11-44N11.3 | CAPSL    | -0.355220861 | 1.68E-14    |
| RP11-44N11.3 | CYP7B1   | -0.252651079 | 8.06E-08    |
| RP11-44N11.3 | CPQ      | -0.136075392 | 0.004286586 |
| RP11-44N11.3 | RPS6KA6  | -0.405843373 | 7.76E-19    |
| RP11-44N11.3 | TLE1     | -0.366893734 | 1.96E-15    |
| RP11-44N11.3 | TP53INP2 | -0.35864628  | 9.01E-15    |
| RP11-44N11.3 | KATNAL2  | -0.489594337 | 7.65E-28    |
| RP11-44N11.3 | SGPP2    | -0.199005682 | 2.67E-05    |
| RP11-44N11.3 | CTH      | -0.359859321 | 7.22E-15    |
| RP11-44N11.3 | KIF12    | -0.268226135 | 1.14E-08    |
| RP11-44N11.3 | TMEM220  | -0.419505096 | 3.86E-20    |
| RP11-44N11.3 | CENPJ    | -0.296127477 | 2.46E-10    |
| RP11-44N11.3 | FAM155B  | -0.333085061 | 7.80E-13    |
| RP11-44N11.3 | WFS1     | -0.371423627 | 8.30E-16    |
| RP11-44N11.3 | SELENBP1 | -0.420715442 | 2.94E-20    |
| RP11-44N11.3 | SNTA1    | -0.545870352 | 1.86E-35    |
| RP11-44N11.3 | FRAS1    | -0.153003629 | 0.001301744 |
| RP11-44N11.3 | FBLN7    | -0.430793945 | 2.90E-21    |
| RP11-44N11.3 | AGPAT9   | -0.367431318 | 1.77E-15    |
| RP11-44N11.3 | GPR83    | -0.385195577 | 5.62E-17    |
| RP11-44N11.3 | PRTG     | -0.377812088 | 2.42E-16    |
| RP11-44N11.3 | EGR3     | 0.016366823  | 0.732374815 |
| RP11-44N11.3 | GRAMD2   | -0.279900795 | 2.41E-09    |
| RP11-44N11.3 | HYOU1    | -0.273080139 | 6.02E-09    |
| RP11-44N11.3 | FBLN5    | -0.210637506 | 8.56E-06    |
| RP11-44N11.3 | ITM2A    | -0.259139823 | 3.62E-08    |
| RP11-44N11.3 | SRF      | -0.267791954 | 1.20E-08    |
| RP11-44N11.3 | FGFR2    | -0.288491792 | 7.33E-10    |
| RP11-44N11.3 | MT1A     | -0.249763876 | 1.14E-07    |
| RP11-44N11.3 | MAMDC2   | -0.115139953 | 0.015795626 |
| RP11-44N11.3 | FHL2     | -0.261925333 | 2.55E-08    |
| RP11-44N11.3 | FTCDNL1  | -0.513614717 | 6.41E-31    |
| RP11-44N11.3 | PKIA     | -0.12821205  | 0.007149674 |
| RP11-44N11.3 | DNAJB4   | -0.227889854 | 1.40E-06    |
| RP11-44N11.3 | SLC25A33 | -0.390933121 | 1.76E-17    |
| RP11-44N11.3 | EYA2     | -0.340956489 | 2.06E-13    |
| RP11-44N11.3 | LPAR1    | -0.302140054 | 1.02E-10    |
| RP11-44N11.3 | STX11    | -0.350939106 | 3.61E-14    |

|              |          |              |             |
|--------------|----------|--------------|-------------|
| RP11-44N11.3 | ARHGEF28 | -0.428162618 | 5.35E-21    |
| RP11-44N11.3 | OR2W3    | -0.324952642 | 2.96E-12    |
| RP11-44N11.3 | ALDH1B1  | -0.456263407 | 5.87E-24    |
| RP11-44N11.3 | CXCL12   | -0.106096336 | 0.026222239 |
| RP11-44N11.3 | OLFM2    | -0.245724608 | 1.85E-07    |
| RP11-44N11.3 | TUB      | -0.352138955 | 2.92E-14    |
| RP11-44N11.3 | HTRA3    | -0.10874979  | 0.02267735  |
| RP11-44N11.3 | CKB      | -0.464478646 | 7.09E-25    |
| RP11-44N11.3 | RGS2     | -0.155857933 | 0.001051696 |
| RP11-44N11.3 | SHANK2   | -0.36177193  | 5.08E-15    |
| RP11-44N11.3 | CNTFR    | -0.398674835 | 3.55E-18    |
| RP11-44N11.3 | CYTH3    | -0.288944696 | 6.88E-10    |
| RP11-44N11.3 | PLAC9    | -0.192689986 | 4.83E-05    |
| RP11-44N11.3 | WVOX     | -0.427349007 | 6.46E-21    |
| RP11-44N11.3 | NPR3     | -0.131169331 | 0.005916598 |
| RP11-44N11.3 | SDC2     | -0.029034667 | 0.544025263 |
| RP11-44N11.3 | KLF15    | -0.493537143 | 2.48E-28    |
| RP11-44N11.3 | TMEM164  | -0.335794544 | 4.96E-13    |
| RP11-44N11.3 | LONRF3   | -0.059339253 | 0.21466328  |
| RP11-44N11.3 | GBP1     | -0.205229463 | 1.46E-05    |
| RP11-44N11.3 | ARHGAP6  | -0.373316237 | 5.77E-16    |
| RP11-44N11.3 | TMEM119  | -0.080423344 | 0.092379174 |
| RP11-44N11.3 | SH3RF1   | -0.276352312 | 3.89E-09    |
| RP11-44N11.3 | CRELD2   | -0.305523716 | 6.14E-11    |
| RP11-44N11.3 | PCP4     | -0.114717261 | 0.016186448 |
| RP11-44N11.3 | GCSH     | -0.405942649 | 7.60E-19    |
| RP11-44N11.3 | IMPA2    | -0.322328975 | 4.52E-12    |
| RP11-44N11.3 | C1R      | -0.066643452 | 0.163346513 |
| RP11-44N11.3 | SUCNR1   | -0.190017525 | 6.16E-05    |
| RP11-44N11.3 | SFRP1    | -0.26110463  | 2.83E-08    |
| RP11-44N11.3 | UGT8     | -0.477629891 | 2.13E-26    |
| RP11-44N11.3 | TLE4     | -0.110487791 | 0.020587265 |
| RP11-44N11.3 | ANTXR1   | -0.178126696 | 0.000175729 |
| RP11-44N11.3 | GPX3     | -0.278515416 | 2.91E-09    |
| RP11-44N11.3 | DPY19L2  | -0.44486887  | 1.01E-22    |
| RP11-44N11.3 | FAM46C   | -0.360869242 | 6.00E-15    |
| RP11-44N11.3 | IL33     | -0.144260298 | 0.002446878 |
| RP11-44N11.3 | PEG3     | -0.312492314 | 2.12E-11    |
| RP11-44N11.3 | FAHD2A   | -0.520289558 | 8.08E-32    |
| RP11-44N11.3 | PTGDS    | -0.113361243 | 0.017497964 |
| RP11-44N11.3 | CHCHD10  | -0.511170481 | 1.35E-30    |
| RP11-44N11.3 | CD36     | -0.379739024 | 1.66E-16    |
| RP11-44N11.3 | ANKRD37  | -0.234371363 | 6.84E-07    |
| RP11-44N11.3 | TSPAN33  | -0.388447041 | 2.92E-17    |
| RP11-44N11.3 | PRDM16   | -0.306319454 | 5.45E-11    |
| RP11-44N11.3 | UST      | -0.427783188 | 5.84E-21    |
| RP11-44N11.3 | NEXN     | -0.394526993 | 8.42E-18    |
| RP11-44N11.3 | NUPR1L   | -0.196633713 | 3.34E-05    |
| RP11-44N11.3 | SLC24A3  | -0.49220538  | 3.64E-28    |
| RP11-44N11.3 | MARC1    | -0.340844292 | 2.10E-13    |
| RP11-44N11.3 | MYH11    | -0.122697341 | 0.010076456 |

|              |          |              |             |
|--------------|----------|--------------|-------------|
| RP11-44N11.3 | APOA1    | -0.304713662 | 6.94E-11    |
| RP11-44N11.3 | TMEM178B | -0.127759429 | 0.007357448 |
| RP11-44N11.3 | CAPN6    | -0.112111545 | 0.018787916 |
| RP11-44N11.3 | PPM1L    | -0.375918912 | 3.49E-16    |
| RP11-44N11.3 | FZD8     | -0.338883881 | 2.94E-13    |
| RP11-44N11.3 | RCAN2    | -0.335688729 | 5.04E-13    |
| RP11-44N11.3 | COPZ2    | -0.445129861 | 9.43E-23    |
| RP11-44N11.3 | GAS1     | -0.212514512 | 7.08E-06    |
| RP11-44N11.3 | DACT1    | -0.232071381 | 8.84E-07    |
| RP11-44N11.3 | WBSCR17  | -0.179908951 | 0.000150811 |
| RP11-44N11.3 | NCS1     | -0.258775286 | 3.79E-08    |
| RP11-44N11.3 | SPIRE2   | -0.470791647 | 1.34E-25    |
| RP11-44N11.3 | C15orf52 | -0.361924269 | 4.94E-15    |
| RP11-44N11.3 | SPAG5    | -0.370277537 | 1.03E-15    |
| RP11-44N11.3 | ARL4D    | -0.401072616 | 2.14E-18    |
| RP11-44N11.3 | FAM189A2 | -0.151458393 | 0.001458896 |
| RP11-44N11.3 | MAP1LC3A | -0.446034677 | 7.55E-23    |
| RP11-44N11.3 | KLF6     | 0.034894763  | 0.465840144 |
| RP11-44N11.3 | ADD3     | -0.159753506 | 0.000781506 |
| RP11-44N11.3 | TSPAN7   | -0.242220947 | 2.79E-07    |
| RP11-44N11.3 | KLF9     | -0.260682931 | 2.98E-08    |
| RP11-44N11.3 | KCNQ1    | -0.542126126 | 6.64E-35    |
| RP11-44N11.3 | MAN1A1   | -0.090951347 | 0.0568897   |
| RP11-44N11.3 | MLF1     | -0.23004161  | 1.11E-06    |
| RP11-44N11.3 | RARB     | -0.388707464 | 2.77E-17    |
| RP11-44N11.3 | CDC42EP2 | -0.303834509 | 7.91E-11    |
| RP11-44N11.3 | FAM3B    | -0.264813963 | 1.77E-08    |
| RP11-44N11.3 | GADD45B  | -0.222627341 | 2.47E-06    |
| RP11-44N11.3 | TMEM47   | -0.267465857 | 1.25E-08    |
| RP11-44N11.3 | SDF2L1   | -0.251844277 | 8.89E-08    |
| RP11-44N11.3 | CCDC85A  | -0.145950918 | 0.002171432 |
| RP11-44N11.3 | CRYBG3   | -0.069697471 | 0.144858724 |
| RP11-44N11.3 | FBLN2    | -0.043219663 | 0.366317436 |
| RP11-44N11.3 | PEBP4    | -0.432704852 | 1.86E-21    |
| RP11-44N11.3 | CDADC1   | -0.487168824 | 1.52E-27    |
| RP11-44N11.3 | FAM63A   | -0.341778752 | 1.79E-13    |
| RP11-44N11.3 | GLUL     | -0.301303182 | 1.15E-10    |
| RP11-44N11.3 | FREM2    | -0.460708888 | 1.88E-24    |
| RP11-44N11.3 | ACKR3    | -0.276900393 | 3.61E-09    |
| RP11-44N11.3 | DENND6A  | -0.410240204 | 3.00E-19    |
| RP11-44N11.3 | CLDN8    | -0.163369931 | 0.000589641 |
| RP11-44N11.3 | UTS2R    | 0.002107655  | 0.96487696  |
| RP11-44N11.3 | SCNN1B   | -0.39024419  | 2.03E-17    |
| RP11-44N11.3 | TTC30A   | -0.354183762 | 2.02E-14    |
| RP11-44N11.3 | CORO2B   | -0.279410161 | 2.57E-09    |
| RP11-44N11.3 | TC2N     | -0.207617104 | 1.16E-05    |
| RP11-44N11.3 | ALDH2    | -0.578473218 | 1.43E-40    |
| RP11-44N11.3 | GPR183   | -0.062006041 | 0.194729344 |
| RP11-44N11.3 | C4orf47  | -0.304780318 | 6.87E-11    |
| RP11-44N11.3 | SLC25A42 | -0.480252708 | 1.04E-26    |
| RP11-44N11.3 | LGMN     | -0.384517568 | 6.43E-17    |



|              |          |              |             |
|--------------|----------|--------------|-------------|
| RP11-44N11.3 | ACSF2    | -0.532204359 | 1.79E-33    |
| RP11-44N11.3 | KIAA1467 | -0.441721519 | 2.16E-22    |
| RP11-44N11.3 | PRKG1    | -0.348024803 | 6.05E-14    |
| RP11-44N11.3 | GNAI1    | -0.42167515  | 2.36E-20    |
| RP11-44N11.3 | ABCC4    | -0.242250309 | 2.78E-07    |
| RP11-44N11.3 | PRPS1    | -0.418601983 | 4.72E-20    |
| RP11-44N11.3 | TSPAN5   | -0.171907879 | 0.00029623  |
| RP11-44N11.3 | CR2      | -0.184744684 | 9.89E-05    |
| RP11-44N11.3 | CCDC170  | -0.30160403  | 1.10E-10    |
| RP11-44N11.3 | RRAD     | -0.095438121 | 0.045661038 |
| RP11-44N11.3 | SCGB2A1  | -0.460907043 | 1.79E-24    |
| RP11-44N11.3 | SESN3    | -0.158844293 | 0.000838093 |
| RP11-44N11.3 | SGK223   | -0.080426607 | 0.092365915 |
| RP11-44N11.3 | NDRG2    | -0.551901936 | 2.32E-36    |
| RP11-44N11.3 | C3orf52  | -0.232991232 | 7.98E-07    |
| RP11-44N11.3 | FLRT3    | 0.362873765  | 4.14E-15    |
| RP11-44N11.3 | MST1R    | 0.583881403  | 1.78E-41    |
| RP11-44N11.3 | SDC1     | 0.084458348  | 0.077108873 |
| RP11-44N11.3 | ST8SIA4  | 0.384442391  | 6.53E-17    |
| RP11-44N11.3 | UBTD1    | 0.271773767  | 7.15E-09    |
| RP11-44N11.3 | EPHA2    | 0.465163038  | 5.93E-25    |
| RP11-44N11.3 | TMEM130  | 0.436054755  | 8.41E-22    |
| RP11-44N11.3 | SPINK2   | 0.243473987  | 2.41E-07    |
| RP11-44N11.3 | MMP16    | 0.592017368  | 7.21E-43    |
| RP11-44N11.3 | SIGLEC15 | 0.550036986  | 4.44E-36    |
| RP11-44N11.3 | RIN1     | 0.511988488  | 1.05E-30    |
| RP11-44N11.3 | IL1RN    | 0.288947959  | 6.87E-10    |
| RP11-44N11.3 | FCER1G   | 0.179318034  | 0.00015868  |
| RP11-44N11.3 | CD276    | 0.641631023  | 2.70E-52    |
| RP11-44N11.3 | CTSB     | 0.253477597  | 7.29E-08    |
| RP11-44N11.3 | FAM171A2 | 0.316193562  | 1.19E-11    |
| RP11-44N11.3 | ASPHD1   | 0.388849449  | 2.69E-17    |
| RP11-44N11.3 | C15orf48 | 0.205429461  | 1.44E-05    |
| RP11-44N11.3 | DYSF     | 0.32687589   | 2.17E-12    |
| RP11-44N11.3 | PDZRN4   | 0.317109725  | 1.03E-11    |
| RP11-44N11.3 | EFHD2    | 0.413621171  | 1.43E-19    |
| RP11-44N11.3 | ASF1B    | 0.206433709  | 1.30E-05    |
| RP11-44N11.3 | AQP1     | 0.224707609  | 1.98E-06    |
| RP11-44N11.3 | ARRDC2   | 0.342042296  | 1.71E-13    |
| RP11-44N11.3 | PRSS1    | 0.493128177  | 2.79E-28    |
| RP11-44N11.3 | MAPK13   | 0.475825366  | 3.47E-26    |
| RP11-44N11.3 | CST5     | 0.465748648  | 5.08E-25    |
| RP11-44N11.3 | AHR      | 0.429993383  | 3.50E-21    |
| RP11-44N11.3 | BAX      | 0.34298697   | 1.45E-13    |
| RP11-44N11.3 | C1orf115 | 0.238308354  | 4.38E-07    |
| RP11-44N11.3 | PLK3     | 0.422247486  | 2.08E-20    |
| RP11-44N11.3 | JAG2     | 0.329272183  | 1.47E-12    |
| RP11-44N11.3 | RAD23B   | 0.542832645  | 5.23E-35    |
| RP11-44N11.3 | CA12     | 0.055506517  | 0.245816907 |
| RP11-44N11.3 | ADTRP    | 0.387948038  | 3.23E-17    |
| RP11-44N11.3 | UCP2     | 0.402723383  | 1.51E-18    |

|              |          |             |             |
|--------------|----------|-------------|-------------|
| RP11-44N11.3 | IGFBP2   | 0.190788724 | 5.74E-05    |
| RP11-44N11.3 | LOXL2    | 0.274756722 | 4.82E-09    |
| RP11-44N11.3 | GPX1     | 0.271809653 | 7.12E-09    |
| RP11-44N11.3 | P3H3     | 0.366573311 | 2.08E-15    |
| RP11-44N11.3 | C2orf81  | 0.441666058 | 2.19E-22    |
| RP11-44N11.3 | CDT1     | 0.269082298 | 1.02E-08    |
| RP11-44N11.3 | SNX25    | 0.489763555 | 7.29E-28    |
| RP11-44N11.3 | MTHFD1L  | 0.485006713 | 2.78E-27    |
| RP11-44N11.3 | CDC42BPG | 0.50495459  | 8.79E-30    |
| RP11-44N11.3 | MSN      | 0.444562206 | 1.08E-22    |
| RP11-44N11.3 | SIGLEC6  | 0.40742983  | 5.51E-19    |
| RP11-44N11.3 | F2R      | 0.346915875 | 7.34E-14    |
| RP11-44N11.3 | TMEM184A | 0.392301621 | 1.33E-17    |
| RP11-44N11.3 | CKS2     | 0.157779904 | 0.000909141 |
| RP11-44N11.3 | TAX1BP3  | 0.431968971 | 2.21E-21    |
| RP11-44N11.3 | PMEPA1   | 0.460831866 | 1.82E-24    |
| RP11-44N11.3 | CXCL16   | 0.36171732  | 5.13E-15    |
| RP11-44N11.3 | FAXC     | 0.580198311 | 7.41E-41    |
| RP11-44N11.3 | VTCN1    | 0.38116112  | 1.25E-16    |
| RP11-44N11.3 | SH2D4A   | 0.490276459 | 6.30E-28    |
| RP11-44N11.3 | RNF24    | 0.455313044 | 7.47E-24    |
| RP11-44N11.3 | LY6G6C   | 0.3806683   | 1.38E-16    |
| RP11-44N11.3 | NID1     | 0.416413915 | 7.70E-20    |
| RP11-44N11.3 | STAC     | 0.533408605 | 1.20E-33    |
| RP11-44N11.3 | RAB34    | 0.548505509 | 7.54E-36    |
| RP11-44N11.3 | HES4     | 0.275743381 | 4.22E-09    |
| RP11-44N11.3 | EPHA10   | 0.523580455 | 2.86E-32    |
| RP11-44N11.3 | ENTPD2   | 0.438317432 | 4.90E-22    |
| RP11-44N11.3 | DDB2     | 0.360688534 | 6.20E-15    |
| RP11-44N11.3 | NKAIN4   | 0.229553528 | 1.17E-06    |
| RP11-44N11.3 | TRIM29   | 0.409298368 | 3.68E-19    |
| RP11-44N11.3 | ADCY8    | 0.531678902 | 2.12E-33    |
| RP11-44N11.3 | SFTA2    | 0.220537429 | 3.08E-06    |
| RP11-44N11.3 | NRIP1    | 0.606294419 | 2.06E-45    |
| RP11-44N11.3 | VWA1     | 0.28171454  | 1.88E-09    |
| RP11-44N11.3 | APLNR    | 0.322028268 | 4.74E-12    |
| RP11-44N11.3 | REN      | 0.440543259 | 2.87E-22    |
| RP11-44N11.3 | EDIL3    | 0.270781008 | 8.15E-09    |
| RP11-44N11.3 | AGRN     | 0.51414833  | 5.44E-31    |
| RP11-44N11.3 | TREM1    | 0.422791454 | 1.83E-20    |
| RP11-44N11.3 | SRL      | 0.387066201 | 3.86E-17    |
| RP11-44N11.3 | RASGRF1  | 0.58354098  | 2.04E-41    |
| RP11-44N11.3 | RMI2     | 0.38870789  | 2.77E-17    |
| RP11-44N11.3 | SAMD1    | 0.346406943 | 8.03E-14    |
| RP11-44N11.3 | MGAT4B   | 0.484151259 | 3.53E-27    |
| RP11-44N11.3 | NXN      | 0.528185383 | 6.57E-33    |
| RP11-44N11.3 | SH3BGRL3 | 0.299579649 | 1.49E-10    |
| RP11-44N11.3 | CA11     | 0.275575155 | 4.32E-09    |
| RP11-44N11.3 | PLD3     | 0.312674157 | 2.07E-11    |
| RP11-44N11.3 | LURAP1L  | 0.233867396 | 7.23E-07    |
| RP11-44N11.3 | CARNS1   | 0.342302294 | 1.64E-13    |

|              |          |             |             |
|--------------|----------|-------------|-------------|
| RP11-44N11.3 | PDLIM7   | 0.449874221 | 2.93E-23    |
| RP11-44N11.3 | BCL2L1   | 0.48667748  | 1.74E-27    |
| RP11-44N11.3 | GGT6     | 0.104100181 | 0.029194467 |
| RP11-44N11.3 | DPYSL3   | 0.493504945 | 2.51E-28    |
| RP11-44N11.3 | FYN      | 0.411065446 | 2.50E-19    |
| RP11-44N11.3 | TK1      | 0.181497308 | 0.000131436 |
| RP11-44N11.3 | AK1      | 0.15161598  | 0.001442106 |
| RP11-44N11.3 | HIGD1B   | 0.177016633 | 0.000193147 |
| RP11-44N11.3 | TMEM59L  | 0.515165627 | 3.98E-31    |
| RP11-44N11.3 | MEGF9    | 0.44372051  | 1.33E-22    |
| RP11-44N11.3 | ZFP36L1  | 0.469739598 | 1.77E-25    |
| RP11-44N11.3 | ADRA1B   | 0.472309933 | 8.94E-26    |
| RP11-44N11.3 | EPHA4    | 0.599765251 | 3.12E-44    |
| RP11-44N11.3 | TCERG1L  | 0.455696303 | 6.78E-24    |
| RP11-44N11.3 | NGFR     | 0.395524716 | 6.85E-18    |
| RP11-44N11.3 | EBI3     | 0.324191656 | 3.35E-12    |
| RP11-44N11.3 | S100A10  | 0.419490203 | 3.87E-20    |
| RP11-44N11.3 | S100B    | 0.336267873 | 4.58E-13    |
| RP11-44N11.3 | CD44     | 0.308687237 | 3.81E-11    |
| RP11-44N11.3 | BHLHE41  | 0.495658687 | 1.35E-28    |
| RP11-44N11.3 | FBX02    | 0.326596034 | 2.27E-12    |
| RP11-44N11.3 | SLC30A2  | 0.160024284 | 0.000765349 |
| RP11-44N11.3 | FRMD5    | 0.27359205  | 5.62E-09    |
| RP11-44N11.3 | SAMD11   | 0.316340086 | 1.17E-11    |
| RP11-44N11.3 | SIPA1L2  | 0.56413716  | 2.99E-38    |
| RP11-44N11.3 | S100A16  | 0.441324501 | 2.38E-22    |
| RP11-44N11.3 | PPL      | 0.54537532  | 2.21E-35    |
| RP11-44N11.3 | ARHGDIB  | 0.256242682 | 5.19E-08    |
| RP11-44N11.3 | CDC42EP3 | 0.377542871 | 2.55E-16    |
| RP11-44N11.3 | RUNX2    | 0.484763027 | 2.97E-27    |
| RP11-44N11.3 | LAMC2    | 0.413835779 | 1.36E-19    |
| RP11-44N11.3 | BRINP1   | 0.399536883 | 2.96E-18    |
| RP11-44N11.3 | GPRC5B   | 0.496260668 | 1.13E-28    |
| RP11-44N11.3 | AQP5     | 0.333209883 | 7.64E-13    |
| RP11-44N11.3 | PLAG1    | 0.358216355 | 9.75E-15    |
| RP11-44N11.3 | PTPRU    | 0.464994103 | 6.19E-25    |
| RP11-44N11.3 | ANGPTL4  | 0.423641802 | 1.51E-20    |
| RP11-44N11.3 | PALM3    | 0.334571716 | 6.09E-13    |
| RP11-44N11.3 | ACP5     | 0.29938348  | 1.53E-10    |
| RP11-44N11.3 | DLG4     | 0.371685469 | 7.89E-16    |
| RP11-44N11.3 | ETNK2    | 0.457665508 | 4.11E-24    |
| RP11-44N11.3 | CD109    | 0.645048443 | 5.22E-53    |
| RP11-44N11.3 | SNX22    | 0.385452312 | 5.34E-17    |
| RP11-44N11.3 | TMEM98   | 0.598797173 | 4.64E-44    |
| RP11-44N11.3 | CTHRC1   | 0.340866277 | 2.09E-13    |
| RP11-44N11.3 | S100A2   | 0.352687462 | 2.64E-14    |
| RP11-44N11.3 | C11orf80 | 0.453286819 | 1.25E-23    |
| RP11-44N11.3 | SREBF1   | 0.449750534 | 3.02E-23    |
| RP11-44N11.3 | PRSS22   | 0.346540843 | 7.84E-14    |
| RP11-44N11.3 | CMTM3    | 0.41399592  | 1.32E-19    |
| RP11-44N11.3 | RDH5     | 0.46095839  | 1.77E-24    |

|              |          |             |             |
|--------------|----------|-------------|-------------|
| RP11-44N11.3 | MYH10    | 0.577988541 | 1.72E-40    |
| RP11-44N11.3 | EVPL     | 0.533587894 | 1.14E-33    |
| RP11-44N11.3 | SCD      | 0.312348485 | 2.17E-11    |
| RP11-44N11.3 | CD151    | 0.494158131 | 2.08E-28    |
| RP11-44N11.3 | S100A4   | 0.321898056 | 4.84E-12    |
| RP11-44N11.3 | BNIP1    | 0.300827582 | 1.24E-10    |
| RP11-44N11.3 | MAP3K6   | 0.377236774 | 2.70E-16    |
| RP11-44N11.3 | MANEAL   | 0.245154116 | 1.98E-07    |
| RP11-44N11.3 | CD207    | 0.377058603 | 2.80E-16    |
| RP11-44N11.3 | CD1A     | 0.38159743  | 1.15E-16    |
| RP11-44N11.3 | C3       | 0.342544278 | 1.57E-13    |
| RP11-44N11.3 | NT5E     | 0.489764265 | 7.29E-28    |
| RP11-44N11.3 | CACNG4   | 0.460409075 | 2.03E-24    |
| RP11-44N11.3 | FHOD1    | 0.28004973  | 2.36E-09    |
| RP11-44N11.3 | LEMD1    | 0.536034826 | 5.08E-34    |
| RP11-44N11.3 | ATP11A   | 0.462799227 | 1.10E-24    |
| RP11-44N11.3 | PPAP2C   | 0.362908233 | 4.12E-15    |
| RP11-44N11.3 | DRAM1    | 0.517235823 | 2.10E-31    |
| RP11-44N11.3 | CDA      | 0.228836513 | 1.26E-06    |
| RP11-44N11.3 | CCND2    | 0.409891554 | 3.23E-19    |
| RP11-44N11.3 | LCN6     | 0.422928134 | 1.78E-20    |
| RP11-44N11.3 | CDH4     | 0.467873797 | 2.91E-25    |
| RP11-44N11.3 | MMP11    | 0.383186231 | 8.39E-17    |
| RP11-44N11.3 | B3GAT1   | 0.477161384 | 2.41E-26    |
| RP11-44N11.3 | SPP1     | 0.136752267 | 0.004096853 |
| RP11-44N11.3 | HLA-DQB1 | 0.159001455 | 0.000828049 |
| RP11-44N11.3 | SDC3     | 0.578976477 | 1.18E-40    |
| RP11-44N11.3 | CX3CL1   | 0.409481203 | 3.54E-19    |
| RP11-44N11.3 | SDK1     | 0.530372884 | 3.24E-33    |
| RP11-44N11.3 | DOCK9    | 0.574988423 | 5.38E-40    |
| RP11-44N11.3 | CSF2     | 0.475149447 | 4.17E-26    |
| RP11-44N11.3 | GRHL3    | 0.549180964 | 5.97E-36    |
| RP11-44N11.3 | TMEM92   | 0.52723242  | 8.93E-33    |
| RP11-44N11.3 | BASP1    | 0.519693393 | 9.74E-32    |
| RP11-44N11.3 | HRH1     | 0.630201751 | 5.70E-50    |
| RP11-44N11.3 | ESM1     | 0.172910992 | 0.000272625 |
| RP11-44N11.3 | B4GALNT3 | 0.546905237 | 1.31E-35    |
| RP11-44N11.3 | LMO3     | 0.34245974  | 1.59E-13    |
| RP11-44N11.3 | C9orf16  | 0.327369078 | 2.00E-12    |
| RP11-44N11.3 | SEMA3F   | 0.407816535 | 5.07E-19    |
| RP11-44N11.3 | PLA2G12B | 0.214037174 | 6.06E-06    |
| RP11-44N11.3 | KLK6     | 0.470803563 | 1.34E-25    |
| RP11-44N11.3 | ST3GAL5  | 0.440922802 | 2.62E-22    |
| RP11-44N11.3 | FAM132B  | 0.250499748 | 1.05E-07    |
| RP11-44N11.3 | CDKN1A   | 0.296281093 | 2.41E-10    |
| RP11-44N11.3 | E2F1     | 0.242512009 | 2.69E-07    |
| RP11-44N11.3 | B3GNT8   | 0.31461939  | 1.53E-11    |
| RP11-44N11.3 | MTMR11   | 0.486457624 | 1.85E-27    |
| RP11-44N11.3 | MYO1G    | 0.426586034 | 7.70E-21    |
| RP11-44N11.3 | TMSB10   | 0.376954506 | 2.86E-16    |
| RP11-44N11.3 | UNC5CL   | 0.469345275 | 1.97E-25    |

|              |          |             |             |
|--------------|----------|-------------|-------------|
| RP11-44N11.3 | ABR      | 0.485701601 | 2.29E-27    |
| RP11-44N11.3 | PLP2     | 0.388299241 | 3.01E-17    |
| RP11-44N11.3 | SRCIN1   | 0.196374213 | 3.43E-05    |
| RP11-44N11.3 | PDE9A    | 0.48875562  | 9.69E-28    |
| RP11-44N11.3 | TREM2    | 0.166553169 | 0.000457924 |
| RP11-44N11.3 | KDELR3   | 0.474185095 | 5.40E-26    |
| RP11-44N11.3 | PC       | 0.53547866  | 6.10E-34    |
| RP11-44N11.3 | C2CD4A   | 0.356606296 | 1.31E-14    |
| RP11-44N11.3 | PELI1    | 0.485588694 | 2.36E-27    |
| RP11-44N11.3 | SSX1     | 0.316670012 | 1.11E-11    |
| RP11-44N11.3 | MROH6    | 0.387670026 | 3.42E-17    |
| RP11-44N11.3 | ESPN     | 0.41009595  | 3.09E-19    |
| RP11-44N11.3 | BMP1     | 0.357473524 | 1.12E-14    |
| RP11-44N11.3 | TM4SF4   | 0.491557791 | 4.37E-28    |
| RP11-44N11.3 | CORO2A   | 0.610332402 | 3.73E-46    |
| RP11-44N11.3 | CD164L2  | 0.30993504  | 3.15E-11    |
| RP11-44N11.3 | CTSS     | 0.29937809  | 1.53E-10    |
| RP11-44N11.3 | CLU      | 0.558585288 | 2.20E-37    |
| RP11-44N11.3 | TMSB4X   | 0.446474957 | 6.78E-23    |
| RP11-44N11.3 | WNT10A   | 0.386484233 | 4.34E-17    |
| RP11-44N11.3 | NAPSA    | 0.432226557 | 2.08E-21    |
| RP11-44N11.3 | PLEKHA4  | 0.511610761 | 1.18E-30    |
| RP11-44N11.3 | SFPA1    | 0.241720771 | 2.95E-07    |
| RP11-44N11.3 | C1orf116 | 0.467808266 | 2.96E-25    |
| RP11-44N11.3 | TM4SF1   | 0.432461307 | 1.97E-21    |
| RP11-44N11.3 | SEL1L3   | 0.563636171 | 3.58E-38    |
| RP11-44N11.3 | VASN     | 0.515821508 | 3.25E-31    |
| RP11-44N11.3 | NPTXR    | 0.474937855 | 4.41E-26    |
| RP11-44N11.3 | PDE4C    | 0.318409998 | 8.43E-12    |
| RP11-44N11.3 | CDC42EP1 | 0.644455824 | 6.95E-53    |
| RP11-44N11.3 | ENDOD1   | 0.554505178 | 9.34E-37    |
| RP11-44N11.3 | RYR1     | 0.586328901 | 6.86E-42    |
| RP11-44N11.3 | IL1RAP   | 0.661618811 | 1.32E-56    |
| RP11-44N11.3 | SLC35F2  | 0.563108677 | 4.33E-38    |
| RP11-44N11.3 | ISYNA1   | 0.421830326 | 2.28E-20    |
| RP11-44N11.3 | HLA-G    | 0.342752362 | 1.51E-13    |
| RP11-44N11.3 | CDKN2B   | 0.454426526 | 9.35E-24    |
| RP11-44N11.3 | ALDH1A3  | 0.447654948 | 5.07E-23    |
| RP11-44N11.3 | CLIP3    | 0.43500994  | 1.08E-21    |
| RP11-44N11.3 | ULBP2    | 0.539867704 | 1.42E-34    |
| RP11-44N11.3 | ETHE1    | 0.496650168 | 1.01E-28    |
| RP11-44N11.3 | XPR1     | 0.574961898 | 5.43E-40    |
| RP11-44N11.3 | SPTBN2   | 0.428418502 | 5.04E-21    |
| RP11-44N11.3 | IVL      | 0.422071194 | 2.16E-20    |
| RP11-44N11.3 | MARCO    | 0.316456113 | 1.15E-11    |
| RP11-44N11.3 | PLXND1   | 0.404780814 | 9.74E-19    |
| RP11-44N11.3 | EMILIN2  | 0.366962102 | 1.93E-15    |
| RP11-44N11.3 | PLAUR    | 0.434655333 | 1.17E-21    |
| RP11-44N11.3 | CDC42EP5 | 0.477649324 | 2.11E-26    |
| RP11-44N11.3 | TRPC5    | 0.471800049 | 1.02E-25    |
| RP11-44N11.3 | TMEM100  | 0.428184887 | 5.32E-21    |

|              |           |             |          |
|--------------|-----------|-------------|----------|
| RP11-44N11.3 | QSOX1     | 0.671450365 | 7.52E-59 |
| RP11-44N11.3 | ARHGAP23  | 0.478630876 | 1.62E-26 |
| RP11-44N11.3 | MDFI      | 0.488202291 | 1.13E-27 |
| RP11-44N11.3 | FSTL3     | 0.492495307 | 3.35E-28 |
| RP11-44N11.3 | INF2      | 0.463926878 | 8.18E-25 |
| RP11-44N11.3 | TGFBR1    | 0.568892584 | 5.23E-39 |
| RP11-44N11.3 | TGFBI     | 0.326724544 | 2.22E-12 |
| RP11-44N11.3 | ERBB3     | 0.402723383 | 1.51E-18 |
| RP11-44N11.3 | CCL18     | 0.337779635 | 3.54E-13 |
| RP11-44N11.3 | CCL17     | 0.387517275 | 3.52E-17 |
| RP11-44N11.3 | C16orf45  | 0.551477258 | 2.69E-36 |
| RP11-44N11.3 | PRDM1     | 0.398313063 | 3.83E-18 |
| RP11-44N11.3 | TRIM47    | 0.344911494 | 1.04E-13 |
| RP11-44N11.3 | CNFN      | 0.346583821 | 7.78E-14 |
| RP11-44N11.3 | ARMCX3    | 0.470564982 | 1.42E-25 |
| RP11-44N11.3 | RAMP1     | 0.432619746 | 1.89E-21 |
| RP11-44N11.3 | GABRD     | 0.290336317 | 5.65E-10 |
| RP11-44N11.3 | COL13A1   | 0.384361115 | 6.64E-17 |
| RP11-44N11.3 | S100A5    | 0.385965642 | 4.81E-17 |
| RP11-44N11.3 | MISP      | 0.388437821 | 2.92E-17 |
| RP11-44N11.3 | HES6      | 0.335690289 | 5.04E-13 |
| RP11-44N11.3 | PSD3      | 0.530313168 | 3.30E-33 |
| RP11-44N11.3 | DOK7      | 0.511268636 | 1.31E-30 |
| RP11-44N11.3 | ZMAT3     | 0.498765897 | 5.46E-29 |
| RP11-44N11.3 | MFAP2     | 0.369014001 | 1.31E-15 |
| RP11-44N11.3 | TMEM79    | 0.433174635 | 1.66E-21 |
| RP11-44N11.3 | SLC1A5    | 0.338691826 | 3.04E-13 |
| RP11-44N11.3 | BBC3      | 0.438241404 | 4.99E-22 |
| RP11-44N11.3 | HLA-DQB2  | 0.226805607 | 1.58E-06 |
| RP11-44N11.3 | C1QL1     | 0.453697028 | 1.12E-23 |
| RP11-44N11.3 | TMEM215   | 0.49165939  | 4.25E-28 |
| RP11-44N11.3 | PNP       | 0.446798784 | 6.26E-23 |
| RP11-44N11.3 | ARNTL     | 0.67123987  | 8.42E-59 |
| RP11-44N11.3 | CLDN2     | 0.298101302 | 1.85E-10 |
| RP11-44N11.3 | MVP       | 0.459557408 | 2.53E-24 |
| RP11-44N11.3 | LGALS1    | 0.463179507 | 9.94E-25 |
| RP11-44N11.3 | BIRC7     | 0.242538989 | 2.69E-07 |
| RP11-44N11.3 | COL8A1    | 0.554891842 | 8.15E-37 |
| RP11-44N11.3 | PERP      | 0.459950029 | 2.29E-24 |
| RP11-44N11.3 | GJA4      | 0.464158507 | 7.70E-25 |
| RP11-44N11.3 | IGFL2     | 0.467689743 | 3.05E-25 |
| RP11-44N11.3 | DAPK2     | 0.48471551  | 3.01E-27 |
| RP11-44N11.3 | MAMLD1    | 0.617499013 | 1.69E-47 |
| RP11-44N11.3 | ETV5      | 0.534386328 | 8.74E-34 |
| RP11-44N11.3 | RUNX1     | 0.529930902 | 3.74E-33 |
| RP11-44N11.3 | LONRF2    | 0.491053758 | 5.05E-28 |
| RP11-44N11.3 | SPOCK1    | 0.4007373   | 2.30E-18 |
| RP11-44N11.3 | XKRX      | 0.490034617 | 6.75E-28 |
| RP11-44N11.3 | TGFBI     | 0.487787259 | 1.27E-27 |
| RP11-44N11.3 | ERP27     | 0.352983204 | 2.51E-14 |
| RP11-44N11.3 | TNFRSF10C | 0.40577414  | 7.87E-19 |

|              |          |             |          |
|--------------|----------|-------------|----------|
| RP11-44N11.3 | PALM     | 0.519719634 | 9.66E-32 |
| RP11-44N11.3 | TSC22D1  | 0.586361525 | 6.78E-42 |
| RP11-44N11.3 | TGM2     | 0.390719647 | 1.84E-17 |
| RP11-44N11.3 | UBE2QL1  | 0.410633818 | 2.75E-19 |
| RP11-44N11.3 | ECE1     | 0.662429584 | 8.69E-57 |
| RP11-44N11.3 | COL8A2   | 0.621788341 | 2.54E-48 |
| RP11-44N11.3 | HIST3H2A | 0.312915715 | 1.99E-11 |
| RP11-44N11.3 | TNFRSF21 | 0.536829288 | 3.90E-34 |
| RP11-44N11.3 | SOX4     | 0.543252216 | 4.54E-35 |
| RP11-44N11.3 | ELF3     | 0.420239417 | 3.27E-20 |
| RP11-44N11.3 | TPD52L1  | 0.42187061  | 2.26E-20 |
| RP11-44N11.3 | INHBB    | 0.504167982 | 1.11E-29 |
| RP11-44N11.3 | HPN      | 0.272958013 | 6.12E-09 |
| RP11-44N11.3 | MMP7     | 0.331425732 | 1.03E-12 |
| RP11-44N11.3 | RAB27A   | 0.564107373 | 3.02E-38 |
| RP11-44N11.3 | IGF2BP2  | 0.406396262 | 6.89E-19 |
| RP11-44N11.3 | ITGB4    | 0.577710813 | 1.92E-40 |
| RP11-44N11.3 | PPP1R1B  | 0.471460436 | 1.12E-25 |
| RP11-44N11.3 | NPDC1    | 0.352270869 | 2.85E-14 |
| RP11-44N11.3 | CCL13    | 0.458572898 | 3.26E-24 |
| RP11-44N11.3 | SPINT1   | 0.495437128 | 1.44E-28 |
| RP11-44N11.3 | HEY2     | 0.424559951 | 1.23E-20 |
| RP11-44N11.3 | CST2     | 0.458092487 | 3.69E-24 |
| RP11-44N11.3 | ADM      | 0.246578786 | 1.67E-07 |
| RP11-44N11.3 | VSTM2L   | 0.240036    | 3.59E-07 |
| RP11-44N11.3 | FAM84A   | 0.475905224 | 3.40E-26 |
| RP11-44N11.3 | P4HA2    | 0.413285145 | 1.54E-19 |
| RP11-44N11.3 | LPL      | 0.542039034 | 6.84E-35 |
| RP11-44N11.3 | TMEM173  | 0.467321745 | 3.36E-25 |
| RP11-44N11.3 | DHRS3    | 0.456849486 | 5.06E-24 |
| RP11-44N11.3 | SCN1B    | 0.380599726 | 1.40E-16 |
| RP11-44N11.3 | GLT1D1   | 0.415794629 | 8.83E-20 |
| RP11-44N11.3 | PHYHIP   | 0.297852428 | 1.91E-10 |
| RP11-44N11.3 | BHLHE40  | 0.420654024 | 2.98E-20 |
| RP11-44N11.3 | BID      | 0.459499394 | 2.57E-24 |
| RP11-44N11.3 | POSTN    | 0.310201268 | 3.02E-11 |
| RP11-44N11.3 | ITGA3    | 0.524341016 | 2.25E-32 |
| RP11-44N11.3 | RSPO4    | 0.573523186 | 9.33E-40 |
| RP11-44N11.3 | ADAMTS9  | 0.435306959 | 1.00E-21 |
| RP11-44N11.3 | ABTB2    | 0.629201333 | 9.00E-50 |
| RP11-44N11.3 | KCNQ3    | 0.62729227  | 2.15E-49 |
| RP11-44N11.3 | ANXA1    | 0.513546065 | 6.54E-31 |
| RP11-44N11.3 | S100A11  | 0.391754816 | 1.49E-17 |
| RP11-44N11.3 | CEACAM6  | 0.40563303  | 8.12E-19 |
| RP11-44N11.3 | IER5L    | 0.417887237 | 5.54E-20 |
| RP11-44N11.3 | KRT80    | 0.388924058 | 2.65E-17 |
| RP11-44N11.3 | CDH6     | 0.569256552 | 4.57E-39 |
| RP11-44N11.3 | UNC5B    | 0.412093665 | 2.00E-19 |
| RP11-44N11.3 | PLEKHN1  | 0.540219474 | 1.26E-34 |
| RP11-44N11.3 | SYTL1    | 0.415155201 | 1.02E-19 |
| RP11-44N11.3 | TMEM163  | 0.65416128  | 5.86E-55 |

|              |            |             |             |
|--------------|------------|-------------|-------------|
| RP11-44N11.3 | C4orf48    | 0.328267652 | 1.73E-12    |
| RP11-44N11.3 | B3GNT7     | 0.386878259 | 4.01E-17    |
| RP11-44N11.3 | BAIAP3     | 0.462299373 | 1.25E-24    |
| RP11-44N11.3 | PHLDA2     | 0.398500296 | 3.68E-18    |
| RP11-44N11.3 | GAP43      | 0.614391573 | 6.52E-47    |
| RP11-44N11.3 | S100A1     | 0.230065865 | 1.10E-06    |
| RP11-44N11.3 | PTPRE      | 0.601090772 | 1.81E-44    |
| RP11-44N11.3 | CCND1      | 0.564283116 | 2.83E-38    |
| RP11-44N11.3 | ST6GALNAC5 | 0.535885136 | 5.33E-34    |
| RP11-44N11.3 | KRT17      | 0.342448676 | 1.60E-13    |
| RP11-44N11.3 | HPCAL4     | 0.478587614 | 1.64E-26    |
| RP11-44N11.3 | GABBR2     | 0.409832122 | 3.28E-19    |
| RP11-44N11.3 | DIRAS3     | 0.432623008 | 1.89E-21    |
| RP11-44N11.3 | SERINC2    | 0.253160437 | 7.57E-08    |
| RP11-44N11.3 | PTCHD4     | 0.49105929  | 5.04E-28    |
| RP11-44N11.3 | EPS8       | 0.557690401 | 3.03E-37    |
| RP11-44N11.3 | LY6E       | 0.389047603 | 2.58E-17    |
| RP11-44N11.3 | UPP1       | 0.528517438 | 5.90E-33    |
| RP11-44N11.3 | AHNAK2     | 0.484169131 | 3.51E-27    |
| RP11-44N11.3 | PLXNC1     | 0.371360082 | 8.40E-16    |
| RP11-44N11.3 | TNC        | 0.436439007 | 7.68E-22    |
| RP11-44N11.3 | DUSP4      | 0.442734277 | 1.69E-22    |
| RP11-44N11.3 | NRCAM      | 0.517825181 | 1.74E-31    |
| RP11-44N11.3 | NRP2       | 0.536582765 | 4.23E-34    |
| RP11-44N11.3 | CTSC       | 0.458656139 | 3.19E-24    |
| RP11-44N11.3 | AMIGO2     | 0.597278603 | 8.62E-44    |
| RP11-44N11.3 | NAB2       | 0.391493542 | 1.57E-17    |
| RP11-44N11.3 | TBC1D2     | 0.560454777 | 1.13E-37    |
| RP11-44N11.3 | PHLDA3     | 0.352124487 | 2.92E-14    |
| RP11-44N11.3 | PTP4A3     | 0.308096036 | 4.16E-11    |
| RP11-44N11.3 | CRABP2     | 0.129807498 | 0.006458507 |
| RP11-44N11.3 | GOS2       | 0.405454426 | 8.43E-19    |
| RP11-44N11.3 | S100A6     | 0.429037788 | 4.37E-21    |
| RP11-44N11.3 | FOXQ1      | 0.494165365 | 2.07E-28    |
| RP11-44N11.3 | LRG1       | 0.517951421 | 1.68E-31    |
| RP11-44N11.3 | LAMP5      | 0.495877267 | 1.26E-28    |
| RP11-44N11.3 | ALDH3B1    | 0.411949269 | 2.06E-19    |
| RP11-44N11.3 | CDH2       | 0.342767681 | 1.51E-13    |
| RP11-44N11.3 | SCG5       | 0.360025277 | 7.00E-15    |
| RP11-44N11.3 | ZCCHC16    | 0.437124932 | 6.52E-22    |
| RP11-44N11.3 | GRB7       | 0.543166259 | 4.67E-35    |
| RP11-44N11.3 | TIAM1      | 0.741443152 | 9.83E-78    |
| RP11-44N11.3 | FXD5       | 0.332016275 | 9.32E-13    |
| RP11-44N11.3 | CLDN9      | 0.277988895 | 3.12E-09    |
| RP11-44N11.3 | FAM43A     | 0.438681968 | 4.49E-22    |
| RP11-44N11.3 | CHST2      | 0.613862304 | 8.20E-47    |
| RP11-44N11.3 | HMGA2      | 0.429197645 | 4.21E-21    |
| RP11-44N11.3 | GALNT7     | 0.47764138  | 2.12E-26    |
| RP11-44N11.3 | CBLN1      | 0.463561916 | 9.00E-25    |
| RP11-44N11.3 | STRA6      | 0.515055131 | 4.11E-31    |
| RP11-44N11.3 | MUC21      | 0.37035597  | 1.02E-15    |



|              |          |             |             |
|--------------|----------|-------------|-------------|
| RP11-44N11.3 | PRR36    | 0.445066599 | 9.58E-23    |
| RP11-44N11.3 | NFE2L3   | 0.470564131 | 1.43E-25    |
| RP11-44N11.3 | NR1D1    | 0.179810512 | 0.000152096 |
| RP11-44N11.3 | MUC1     | 0.359180177 | 8.18E-15    |
| RP11-44N11.3 | NAT8L    | 0.42751624  | 6.21E-21    |
| RP11-44N11.3 | APOC1    | 0.298595401 | 1.72E-10    |
| RP11-44N11.3 | EVA1A    | 0.632941587 | 1.61E-50    |
| RP11-44N11.3 | ENTPD1   | 0.442123076 | 1.96E-22    |
| RP11-44N11.3 | COL1A1   | 0.411610832 | 2.22E-19    |
| RP11-44N11.3 | FNDC4    | 0.396842153 | 5.21E-18    |
| RP11-44N11.3 | FRMD3    | 0.396647828 | 5.42E-18    |
| RP11-44N11.3 | SHROOM4  | 0.56372156  | 3.47E-38    |
| RP11-44N11.3 | NELL2    | 0.448481324 | 4.13E-23    |
| RP11-44N11.3 | EPHB3    | 0.51718476  | 2.13E-31    |
| RP11-44N11.3 | TMC6     | 0.472073197 | 9.53E-26    |
| RP11-44N11.3 | NOD1     | 0.562235331 | 5.94E-38    |
| RP11-44N11.3 | GGCT     | 0.486160037 | 2.01E-27    |
| RP11-44N11.3 | ICAM1    | 0.478446622 | 1.70E-26    |
| RP11-44N11.3 | PRSS23   | 0.565065947 | 2.13E-38    |
| RP11-44N11.3 | CFI      | 0.520667853 | 7.18E-32    |
| RP11-44N11.3 | CD55     | 0.54349264  | 4.18E-35    |
| RP11-44N11.3 | RASD2    | 0.643976679 | 8.76E-53    |
| RP11-44N11.3 | KLK11    | 0.433081657 | 1.70E-21    |
| RP11-44N11.3 | ICAM5    | 0.47822166  | 1.81E-26    |
| RP11-44N11.3 | ADORA1   | 0.365547645 | 2.52E-15    |
| RP11-44N11.3 | ITGA2    | 0.568711167 | 5.59E-39    |
| RP11-44N11.3 | ABCC3    | 0.435942273 | 8.64E-22    |
| RP11-44N11.3 | MFGE8    | 0.590743335 | 1.20E-42    |
| RP11-44N11.3 | STK32A   | 0.527080002 | 9.37E-33    |
| RP11-44N11.3 | CYSLTR2  | 0.64033614  | 5.01E-52    |
| RP11-44N11.3 | LAD1     | 0.447407432 | 5.39E-23    |
| RP11-44N11.3 | MGAT3    | 0.563221138 | 4.16E-38    |
| RP11-44N11.3 | IGFBP6   | 0.460184637 | 2.16E-24    |
| RP11-44N11.3 | CYP2S1   | 0.4305165   | 3.10E-21    |
| RP11-44N11.3 | KCNJ2    | 0.488127965 | 1.16E-27    |
| RP11-44N11.3 | FAM20A   | 0.501838355 | 2.22E-29    |
| RP11-44N11.3 | TGFA     | 0.527541417 | 8.08E-33    |
| RP11-44N11.3 | MXRA8    | 0.597549523 | 7.72E-44    |
| RP11-44N11.3 | C8orf4   | 0.449338339 | 3.34E-23    |
| RP11-44N11.3 | CLDN10   | 0.527639979 | 7.83E-33    |
| RP11-44N11.3 | PDE5A    | 0.519650982 | 9.87E-32    |
| RP11-44N11.3 | APOE     | 0.312029906 | 2.28E-11    |
| RP11-44N11.3 | SPOCK2   | 0.473768503 | 6.05E-26    |
| RP11-44N11.3 | TENM1    | 0.347497289 | 6.63E-14    |
| RP11-44N11.3 | SLIT1    | 0.412964155 | 1.65E-19    |
| RP11-44N11.3 | CXCL14   | 0.489931639 | 6.95E-28    |
| RP11-44N11.3 | ECM1     | 0.343435619 | 1.35E-13    |
| RP11-44N11.3 | DUSP5    | 0.525655049 | 1.48E-32    |
| RP11-44N11.3 | SEZ6L2   | 0.331079971 | 1.09E-12    |
| RP11-44N11.3 | THRSP    | 0.167182951 | 0.000435349 |
| RP11-44N11.3 | C19orf33 | 0.444661638 | 1.06E-22    |

|              |           |             |          |
|--------------|-----------|-------------|----------|
| RP11-44N11.3 | MPZL2     | 0.488406687 | 1.07E-27 |
| RP11-44N11.3 | CTSH      | 0.416136754 | 8.19E-20 |
| RP11-44N11.3 | CYP1B1    | 0.488695195 | 9.86E-28 |
| RP11-44N11.3 | ALOX5     | 0.396244143 | 5.90E-18 |
| RP11-44N11.3 | SYTL5     | 0.603449002 | 6.79E-45 |
| RP11-44N11.3 | TNFRSF12A | 0.470425408 | 1.48E-25 |
| RP11-44N11.3 | DUSP6     | 0.6303687   | 5.28E-50 |
| RP11-44N11.3 | ALOX15B   | 0.416780153 | 7.09E-20 |
| RP11-44N11.3 | SDC4      | 0.642343074 | 1.92E-52 |
| RP11-44N11.3 | MDK       | 0.551735696 | 2.46E-36 |
| RP11-44N11.3 | KRT19     | 0.463289436 | 9.66E-25 |
| RP11-44N11.3 | MET       | 0.556825302 | 4.12E-37 |
| RP11-44N11.3 | TESC      | 0.448783591 | 3.83E-23 |
| RP11-44N11.3 | CXCL17    | 0.365293405 | 2.64E-15 |
| RP11-44N11.3 | NPC2      | 0.407347603 | 5.61E-19 |
| RP11-44N11.3 | COMP      | 0.505490383 | 7.49E-30 |
| RP11-44N11.3 | TUSC3     | 0.62463456  | 7.12E-49 |
| RP11-44N11.3 | TMPRSS4   | 0.591995098 | 7.28E-43 |
| RP11-44N11.3 | LGALS3    | 0.407135548 | 5.88E-19 |
| RP11-44N11.3 | CRLF1     | 0.557435652 | 3.32E-37 |
| RP11-44N11.3 | CTXN1     | 0.618163405 | 1.26E-47 |
| RP11-44N11.3 | PCSK1N    | 0.459638968 | 2.48E-24 |
| RP11-44N11.3 | NMU       | 0.237146694 | 5.00E-07 |
| RP11-44N11.3 | GALE      | 0.370619804 | 9.67E-16 |
| RP11-44N11.3 | PCSK2     | 0.306795763 | 5.07E-11 |
| RP11-44N11.3 | GJB3      | 0.543347676 | 4.39E-35 |
| RP11-44N11.3 | SLPI      | 0.454131918 | 1.01E-23 |
| RP11-44N11.3 | AGR2      | 0.529970901 | 3.69E-33 |
| RP11-44N11.3 | MRC2      | 0.653204976 | 9.45E-55 |
| RP11-44N11.3 | GOLT1A    | 0.438570196 | 4.62E-22 |
| RP11-44N11.3 | SLC27A6   | 0.616644644 | 2.45E-47 |
| RP11-44N11.3 | KCNN4     | 0.524405129 | 2.20E-32 |
| RP11-44N11.3 | ETV4      | 0.524131675 | 2.40E-32 |
| RP11-44N11.3 | SYT12     | 0.578971654 | 1.18E-40 |
| RP11-44N11.3 | PVRL4     | 0.457121682 | 4.72E-24 |
| RP11-44N11.3 | PLCD3     | 0.485099904 | 2.71E-27 |
| RP11-44N11.3 | PLAU      | 0.494010047 | 2.17E-28 |
| RP11-44N11.3 | LRRK2     | 0.325945543 | 2.52E-12 |
| RP11-44N11.3 | SFN       | 0.419222687 | 4.11E-20 |
| RP11-44N11.3 | LPAR5     | 0.537522899 | 3.10E-34 |
| RP11-44N11.3 | NGEF      | 0.4684128   | 2.52E-25 |
| RP11-44N11.3 | DTX4      | 0.576705998 | 2.81E-40 |
| RP11-44N11.3 | CST6      | 0.581721987 | 4.12E-41 |
| RP11-44N11.3 | QPCT      | 0.514184358 | 5.38E-31 |
| RP11-44N11.3 | TIMP1     | 0.50229594  | 1.94E-29 |
| RP11-44N11.3 | CAMK2N1   | 0.542198607 | 6.48E-35 |
| RP11-44N11.3 | KLHDC8A   | 0.540803299 | 1.04E-34 |
| RP11-44N11.3 | PDLIM4    | 0.504742162 | 9.37E-30 |
| RP11-44N11.3 | SCEL      | 0.508601706 | 2.94E-30 |
| RP11-44N11.3 | LCN2      | 0.385880962 | 4.90E-17 |
| RP11-44N11.3 | PROS1     | 0.508483835 | 3.05E-30 |

|              |          |              |          |
|--------------|----------|--------------|----------|
| RP11-44N11.3 | GABRB2   | 0.624380094  | 7.99E-49 |
| RP11-44N11.3 | TMPRSS6  | 0.530630471  | 2.98E-33 |
| RP11-44N11.3 | KLK7     | 0.432929539  | 1.76E-21 |
| RP11-44N11.3 | PDZK1IP1 | 0.320805724  | 5.77E-12 |
| RP11-44N11.3 | CDH3     | 0.596849954  | 1.03E-43 |
| RP11-44N11.3 | LRP4     | 0.533631157  | 1.12E-33 |
| RP11-44N11.3 | IGSF1    | 0.584162252  | 1.60E-41 |
| RP11-44N11.3 | B3GNT3   | 0.458576139  | 3.26E-24 |
| RP11-44N11.3 | CLDN1    | 0.589707173  | 1.81E-42 |
| RP11-44N11.3 | GDF15    | 0.378748109  | 2.01E-16 |
| RP11-44N11.3 | ARHGAP36 | 0.547780753  | 9.68E-36 |
| RP11-44N11.3 | LAMB3    | 0.57021385   | 3.21E-39 |
| RP11-44N11.3 | KLK10    | 0.510248786  | 1.79E-30 |
| RP11-44N11.3 | DPP4     | 0.517978371  | 1.66E-31 |
| RP11-44N11.3 | METTL7B  | 0.452121154  | 1.67E-23 |
| RP11-44N11.3 | LIPH     | 0.588015129  | 3.54E-42 |
| RP11-44N11.3 | CLDN16   | 0.499112277  | 4.94E-29 |
| RP11-44N11.3 | CHI3L1   | 0.339976071  | 2.44E-13 |
| RP11-44N11.3 | SLC22A31 | 0.497724237  | 7.40E-29 |
| RP11-44N11.3 | TACSTD2  | 0.567531318  | 8.63E-39 |
| RP11-44N11.3 | SFTPB    | 0.465101195  | 6.02E-25 |
| RP11-44N11.3 | RXRG     | 0.485761175  | 2.25E-27 |
| RP11-44N11.3 | DCSTAMP  | 0.499971543  | 3.84E-29 |
| RP11-44N11.3 | CITED1   | 0.358071675  | 1.00E-14 |
| RP11-44N11.3 | SERPINA1 | 0.46093995   | 1.77E-24 |
| RP11-44N11.3 | PRR15    | 0.655869777  | 2.48E-55 |
| RP11-44N11.3 | SLC34A2  | 0.407317957  | 5.65E-19 |
| RP11-44N11.3 | FN1      | 0.508103129  | 3.42E-30 |
| RP11-44N11.3 | ZCCHC12  | 0.53671326   | 4.06E-34 |
| RP11-60L3.1  | TFF3     | -0.485942513 | 2.14E-27 |
| RP11-60L3.1  | CCL21    | -0.282430485 | 1.70E-09 |
| RP11-60L3.1  | TPO      | -0.569557066 | 4.09E-39 |
| RP11-60L3.1  | MT1G     | -0.598207491 | 5.90E-44 |
| RP11-60L3.1  | DIO1     | -0.527805483 | 7.43E-33 |
| RP11-60L3.1  | DPT      | -0.293119006 | 3.80E-10 |
| RP11-60L3.1  | CDH16    | -0.508433707 | 3.10E-30 |
| RP11-60L3.1  | CRABP1   | -0.497214288 | 8.58E-29 |
| RP11-60L3.1  | SLC26A7  | -0.588548705 | 2.86E-42 |
| RP11-60L3.1  | MT1H     | -0.57993676  | 8.19E-41 |
| RP11-60L3.1  | SLC26A4  | -0.581706249 | 4.14E-41 |
| RP11-60L3.1  | SLC5A8   | -0.660918991 | 1.89E-56 |
| RP11-60L3.1  | PKHD1L1  | -0.506594503 | 5.39E-30 |
| RP11-60L3.1  | TFCP2L1  | -0.610958026 | 2.86E-46 |
| RP11-60L3.1  | WSCD2    | -0.569618313 | 4.00E-39 |
| RP11-60L3.1  | IPCEF1   | -0.53378536  | 1.06E-33 |
| RP11-60L3.1  | SLC5A5   | -0.397149636 | 4.88E-18 |
| RP11-60L3.1  | MT1F     | -0.579434654 | 9.93E-41 |
| RP11-60L3.1  | FOSB     | -0.269026779 | 1.02E-08 |
| RP11-60L3.1  | SEMA3D   | -0.528765492 | 5.45E-33 |
| RP11-60L3.1  | BMP8A    | -0.508091315 | 3.43E-30 |
| RP11-60L3.1  | MATN2    | -0.573597665 | 9.07E-40 |

|             |           |              |             |
|-------------|-----------|--------------|-------------|
| RP11-60L3.1 | PLA2R1    | -0.529423653 | 4.41E-33    |
| RP11-60L3.1 | COL23A1   | -0.588244199 | 3.23E-42    |
| RP11-60L3.1 | HGD       | -0.601225738 | 1.71E-44    |
| RP11-60L3.1 | TCEAL2    | -0.451477518 | 1.96E-23    |
| RP11-60L3.1 | CHRD1     | -0.265190518 | 1.68E-08    |
| RP11-60L3.1 | TNFRSF11B | -0.544454864 | 3.02E-35    |
| RP11-60L3.1 | FAM167A   | -0.57582882  | 3.91E-40    |
| RP11-60L3.1 | KIT       | -0.507080172 | 4.66E-30    |
| RP11-60L3.1 | SLC4A4    | -0.659543409 | 3.84E-56    |
| RP11-60L3.1 | SMOC2     | -0.381305805 | 1.22E-16    |
| RP11-60L3.1 | FHL1      | -0.577888851 | 1.79E-40    |
| RP11-60L3.1 | OTOS      | -0.548402522 | 7.81E-36    |
| RP11-60L3.1 | IGFBPL1   | -0.607623298 | 1.18E-45    |
| RP11-60L3.1 | HBB       | -0.307103709 | 4.84E-11    |
| RP11-60L3.1 | BEX1      | -0.298014489 | 1.87E-10    |
| RP11-60L3.1 | FABP4     | -0.438491926 | 4.70E-22    |
| RP11-60L3.1 | LMOD1     | -0.520792469 | 6.90E-32    |
| RP11-60L3.1 | SOD3      | -0.517695187 | 1.82E-31    |
| RP11-60L3.1 | TMEM171   | -0.564680563 | 2.45E-38    |
| RP11-60L3.1 | PI16      | -0.259916843 | 3.28E-08    |
| RP11-60L3.1 | ZMAT4     | -0.567473827 | 8.82E-39    |
| RP11-60L3.1 | MFAP4     | -0.178655901 | 0.000167954 |
| RP11-60L3.1 | CWH43     | -0.552272654 | 2.04E-36    |
| RP11-60L3.1 | SPX       | -0.570444618 | 2.94E-39    |
| RP11-60L3.1 | APOD      | -0.076653898 | 0.108745158 |
| RP11-60L3.1 | DPP6      | -0.538605104 | 2.16E-34    |
| RP11-60L3.1 | MMRN1     | -0.384481413 | 6.48E-17    |
| RP11-60L3.1 | WDR72     | -0.558162479 | 2.56E-37    |
| RP11-60L3.1 | MPPED2    | -0.604961405 | 3.61E-45    |
| RP11-60L3.1 | PAPSS2    | -0.475193549 | 4.12E-26    |
| RP11-60L3.1 | DCN       | -0.177376861 | 0.000187325 |
| RP11-60L3.1 | SORBS2    | -0.602601693 | 9.66E-45    |
| RP11-60L3.1 | EGR2      | -0.274229498 | 5.17E-09    |
| RP11-60L3.1 | EDN3      | -0.357965044 | 1.02E-14    |
| RP11-60L3.1 | DIO2      | -0.557121396 | 3.71E-37    |
| RP11-60L3.1 | ITPR1     | -0.563028055 | 4.46E-38    |
| RP11-60L3.1 | CFD       | -0.229867759 | 1.13E-06    |
| RP11-60L3.1 | CPXM1     | -0.339005941 | 2.88E-13    |
| RP11-60L3.1 | ELMO1     | -0.567681357 | 8.17E-39    |
| RP11-60L3.1 | GPC3      | -0.346018541 | 8.59E-14    |
| RP11-60L3.1 | MYOC      | -0.142262158 | 0.002813307 |
| RP11-60L3.1 | DEPTOR    | -0.560179515 | 1.25E-37    |
| RP11-60L3.1 | DGKI      | -0.503208285 | 1.48E-29    |
| RP11-60L3.1 | CARTPT    | -0.481084147 | 8.25E-27    |
| RP11-60L3.1 | IYD       | -0.566254462 | 1.38E-38    |
| RP11-60L3.1 | LYVE1     | -0.322903423 | 4.12E-12    |
| RP11-60L3.1 | CLCNKB    | -0.46448701  | 7.07E-25    |
| RP11-60L3.1 | NCAM1     | -0.603415602 | 6.89E-45    |
| RP11-60L3.1 | HBA2      | -0.231591924 | 9.32E-07    |
| RP11-60L3.1 | GLT8D2    | -0.469639924 | 1.82E-25    |
| RP11-60L3.1 | OGDHL     | -0.568681716 | 5.65E-39    |

|             |            |              |             |
|-------------|------------|--------------|-------------|
| RP11-60L3.1 | LIFR       | -0.539022275 | 1.88E-34    |
| RP11-60L3.1 | CSGALNACT1 | -0.446080687 | 7.47E-23    |
| RP11-60L3.1 | RAP1GAP    | -0.571235398 | 2.19E-39    |
| RP11-60L3.1 | COL9A3     | -0.41566069  | 9.10E-20    |
| RP11-60L3.1 | FBLN1      | -0.180942963 | 0.000137916 |
| RP11-60L3.1 | EFEMP1     | -0.371170962 | 8.71E-16    |
| RP11-60L3.1 | AOX1       | -0.507205766 | 4.48E-30    |
| RP11-60L3.1 | GRIN2C     | -0.562666933 | 5.09E-38    |
| RP11-60L3.1 | C11orf74   | -0.476855847 | 2.62E-26    |
| RP11-60L3.1 | PPARGC1A   | -0.637832069 | 1.64E-51    |
| RP11-60L3.1 | ANGPTL1    | -0.443881884 | 1.28E-22    |
| RP11-60L3.1 | SCARA5     | -0.244247914 | 2.20E-07    |
| RP11-60L3.1 | LTF        | -0.469023107 | 2.15E-25    |
| RP11-60L3.1 | CA4        | -0.379292096 | 1.81E-16    |
| RP11-60L3.1 | TG         | -0.546457285 | 1.52E-35    |
| RP11-60L3.1 | FCGBP      | -0.4743033   | 5.24E-26    |
| RP11-60L3.1 | PBX4       | -0.381908859 | 1.08E-16    |
| RP11-60L3.1 | CYR61      | -0.29739597  | 2.05E-10    |
| RP11-60L3.1 | FOS        | -0.316742063 | 1.10E-11    |
| RP11-60L3.1 | KHDRBS2    | -0.43284771  | 1.79E-21    |
| RP11-60L3.1 | MUM1L1     | -0.3991559   | 3.21E-18    |
| RP11-60L3.1 | RGS16      | -0.529300488 | 4.59E-33    |
| RP11-60L3.1 | MT1M       | -0.496017335 | 1.21E-28    |
| RP11-60L3.1 | LRP2       | -0.575305938 | 4.77E-40    |
| RP11-60L3.1 | MAFB       | -0.551085187 | 3.09E-36    |
| RP11-60L3.1 | KCNK2      | -0.449432812 | 3.26E-23    |
| RP11-60L3.1 | TBC1D4     | -0.541000716 | 9.70E-35    |
| RP11-60L3.1 | MIOX       | -0.483203249 | 4.59E-27    |
| RP11-60L3.1 | TPPP       | -0.510834285 | 1.50E-30    |
| RP11-60L3.1 | FMOD       | -0.558865852 | 1.99E-37    |
| RP11-60L3.1 | CITED2     | -0.432917097 | 1.77E-21    |
| RP11-60L3.1 | RGS8       | -0.542892657 | 5.13E-35    |
| RP11-60L3.1 | ABI3BP     | -0.39471161  | 8.10E-18    |
| RP11-60L3.1 | ADH1B      | -0.323556073 | 3.71E-12    |
| RP11-60L3.1 | OGN        | -0.249831483 | 1.13E-07    |
| RP11-60L3.1 | NR4A1      | -0.204591736 | 1.56E-05    |
| RP11-60L3.1 | FOXJ1      | -0.424747103 | 1.17E-20    |
| RP11-60L3.1 | ALDH1A1    | -0.495427478 | 1.44E-28    |
| RP11-60L3.1 | OCA2       | -0.334668217 | 5.99E-13    |
| RP11-60L3.1 | TMEM139    | -0.299005909 | 1.62E-10    |
| RP11-60L3.1 | ARHGAP24   | -0.625662595 | 4.48E-49    |
| RP11-60L3.1 | SLC25A15   | -0.616559327 | 2.54E-47    |
| RP11-60L3.1 | DES        | -0.238839853 | 4.12E-07    |
| RP11-60L3.1 | GDF10      | -0.390398984 | 1.96E-17    |
| RP11-60L3.1 | KIAA1324   | -0.497161292 | 8.72E-29    |
| RP11-60L3.1 | JUN        | -0.352545695 | 2.71E-14    |
| RP11-60L3.1 | C7         | -0.130272435 | 0.006268689 |
| RP11-60L3.1 | LGI3       | -0.580469635 | 6.67E-41    |
| RP11-60L3.1 | CDON       | -0.587318193 | 4.65E-42    |
| RP11-60L3.1 | BCL2       | -0.560468271 | 1.12E-37    |
| RP11-60L3.1 | HLF        | -0.535128395 | 6.85E-34    |

|             |          |              |             |
|-------------|----------|--------------|-------------|
| RP11-60L3.1 | EGR1     | -0.333538588 | 7.23E-13    |
| RP11-60L3.1 | IP6K3    | -0.514812451 | 4.43E-31    |
| RP11-60L3.1 | SCUBE3   | -0.461541272 | 1.52E-24    |
| RP11-60L3.1 | PKNOX2   | -0.396319989 | 5.80E-18    |
| RP11-60L3.1 | SMAD9    | -0.437080577 | 6.59E-22    |
| RP11-60L3.1 | IQGAP2   | -0.644120426 | 8.17E-53    |
| RP11-60L3.1 | GNA14    | -0.578771295 | 1.28E-40    |
| RP11-60L3.1 | LAYN     | -0.401856728 | 1.82E-18    |
| RP11-60L3.1 | AVPR1A   | -0.5181799   | 1.56E-31    |
| RP11-60L3.1 | PDLIM3   | -0.441128271 | 2.50E-22    |
| RP11-60L3.1 | GPM6A    | -0.506929337 | 4.87E-30    |
| RP11-60L3.1 | SDPR     | -0.375372044 | 3.88E-16    |
| RP11-60L3.1 | CRYAB    | -0.380540424 | 1.42E-16    |
| RP11-60L3.1 | FOXA2    | -0.332952798 | 7.97E-13    |
| RP11-60L3.1 | C8orf88  | -0.507347785 | 4.30E-30    |
| RP11-60L3.1 | ISM1     | -0.456369203 | 5.72E-24    |
| RP11-60L3.1 | BMP2     | -0.298753336 | 1.68E-10    |
| RP11-60L3.1 | ID4      | -0.44872348  | 3.89E-23    |
| RP11-60L3.1 | NUPR1    | -0.480035428 | 1.10E-26    |
| RP11-60L3.1 | SERTM1   | -0.578651534 | 1.34E-40    |
| RP11-60L3.1 | IRS1     | -0.551215163 | 2.95E-36    |
| RP11-60L3.1 | FIBIN    | -0.391870023 | 1.45E-17    |
| RP11-60L3.1 | PODN     | -0.186357815 | 8.57E-05    |
| RP11-60L3.1 | TDRD9    | -0.465340224 | 5.66E-25    |
| RP11-60L3.1 | EPHA3    | -0.38401316  | 7.11E-17    |
| RP11-60L3.1 | AIF1L    | -0.359032704 | 8.40E-15    |
| RP11-60L3.1 | EBF4     | -0.513535822 | 6.56E-31    |
| RP11-60L3.1 | ADM2     | -0.538810568 | 2.02E-34    |
| RP11-60L3.1 | GSTM3    | -0.537287184 | 3.35E-34    |
| RP11-60L3.1 | HSD17B6  | -0.229630227 | 1.16E-06    |
| RP11-60L3.1 | AGR3     | -0.246970372 | 1.59E-07    |
| RP11-60L3.1 | EPHB1    | -0.51946859  | 1.04E-31    |
| RP11-60L3.1 | TMOD1    | -0.493723462 | 2.35E-28    |
| RP11-60L3.1 | WASF3    | -0.593745464 | 3.61E-43    |
| RP11-60L3.1 | SELV     | -0.502552291 | 1.79E-29    |
| RP11-60L3.1 | ENPP1    | -0.469776143 | 1.76E-25    |
| RP11-60L3.1 | SYNE1    | -0.560208056 | 1.23E-37    |
| RP11-60L3.1 | PLCH1    | -0.508607103 | 2.94E-30    |
| RP11-60L3.1 | CCDC146  | -0.486582885 | 1.79E-27    |
| RP11-60L3.1 | SLC16A2  | -0.523986666 | 2.52E-32    |
| RP11-60L3.1 | IER2     | -0.348678349 | 5.39E-14    |
| RP11-60L3.1 | KCNAB1   | -0.400704683 | 2.32E-18    |
| RP11-60L3.1 | SYNDIG1  | -0.450473044 | 2.52E-23    |
| RP11-60L3.1 | C16orf89 | -0.502962949 | 1.59E-29    |
| RP11-60L3.1 | CTGF     | -0.199574758 | 2.53E-05    |
| RP11-60L3.1 | NR4A3    | -0.1580976   | 0.000887373 |
| RP11-60L3.1 | KIAA1456 | -0.52974845  | 3.97E-33    |
| RP11-60L3.1 | AQP4     | -0.508446619 | 3.09E-30    |
| RP11-60L3.1 | RNF150   | -0.514177045 | 5.39E-31    |
| RP11-60L3.1 | C1S      | -0.143995375 | 0.00249282  |
| RP11-60L3.1 | PFKFB2   | -0.611826848 | 1.97E-46    |

|             |          |              |             |
|-------------|----------|--------------|-------------|
| RP11-60L3.1 | PROX1    | -0.512543267 | 8.90E-31    |
| RP11-60L3.1 | TCF7L1   | -0.499107523 | 4.94E-29    |
| RP11-60L3.1 | HSPB6    | -0.23554994  | 5.99E-07    |
| RP11-60L3.1 | FHDC1    | -0.472212762 | 9.18E-26    |
| RP11-60L3.1 | PRR15L   | -0.563890634 | 3.26E-38    |
| RP11-60L3.1 | SLC1A1   | -0.605903162 | 2.43E-45    |
| RP11-60L3.1 | BTBD11   | -0.48880879  | 9.55E-28    |
| RP11-60L3.1 | TRIM58   | -0.520923864 | 6.62E-32    |
| RP11-60L3.1 | LRIG1    | -0.549728104 | 4.94E-36    |
| RP11-60L3.1 | ROR2     | -0.339632691 | 2.59E-13    |
| RP11-60L3.1 | GPR125   | -0.500129592 | 3.66E-29    |
| RP11-60L3.1 | FLRT1    | -0.492850383 | 3.02E-28    |
| RP11-60L3.1 | PGF      | -0.451739598 | 1.84E-23    |
| RP11-60L3.1 | DUSP1    | -0.282301899 | 1.73E-09    |
| RP11-60L3.1 | PLA2G7   | -0.336067581 | 4.73E-13    |
| RP11-60L3.1 | PLSCR4   | -0.482891063 | 5.01E-27    |
| RP11-60L3.1 | FAM46B   | -0.42916795  | 4.24E-21    |
| RP11-60L3.1 | GLDC     | -0.393591208 | 1.02E-17    |
| RP11-60L3.1 | ZBTB16   | -0.490208442 | 6.42E-28    |
| RP11-60L3.1 | OMD      | -0.181645271 | 0.000129755 |
| RP11-60L3.1 | HSD11B2  | -0.373383387 | 5.70E-16    |
| RP11-60L3.1 | FGL2     | -0.26983331  | 9.22E-09    |
| RP11-60L3.1 | CLCNKA   | -0.522575752 | 3.93E-32    |
| RP11-60L3.1 | GATM     | -0.542271527 | 6.32E-35    |
| RP11-60L3.1 | TNS3     | -0.498549734 | 5.82E-29    |
| RP11-60L3.1 | TOB1     | -0.312225264 | 2.21E-11    |
| RP11-60L3.1 | MARC2    | -0.586459303 | 6.52E-42    |
| RP11-60L3.1 | LRRC2    | -0.53325595  | 1.27E-33    |
| RP11-60L3.1 | SORD     | -0.351163213 | 3.47E-14    |
| RP11-60L3.1 | RIMS4    | -0.437139747 | 6.50E-22    |
| RP11-60L3.1 | SLC29A4  | -0.435831051 | 8.87E-22    |
| RP11-60L3.1 | SLC39A14 | -0.65066547  | 3.34E-54    |
| RP11-60L3.1 | FAXDC2   | -0.467891495 | 2.89E-25    |
| RP11-60L3.1 | HSPB8    | -0.375890102 | 3.51E-16    |
| RP11-60L3.1 | CCL19    | -0.015498778 | 0.746067466 |
| RP11-60L3.1 | KCNIP3   | -0.470269937 | 1.54E-25    |
| RP11-60L3.1 | CGNL1    | -0.574468332 | 6.54E-40    |
| RP11-60L3.1 | ATF3     | -0.070003567 | 0.143097602 |
| RP11-60L3.1 | SGCD     | -0.391374384 | 1.61E-17    |
| RP11-60L3.1 | STARD13  | -0.493434706 | 2.56E-28    |
| RP11-60L3.1 | LDHD     | -0.549874114 | 4.70E-36    |
| RP11-60L3.1 | RCAN1    | -0.279337573 | 2.60E-09    |
| RP11-60L3.1 | ID3      | -0.386502848 | 4.32E-17    |
| RP11-60L3.1 | SYTL3    | -0.600608069 | 2.20E-44    |
| RP11-60L3.1 | MT1E     | -0.493690259 | 2.38E-28    |
| RP11-60L3.1 | CAMK1D   | -0.493224134 | 2.72E-28    |
| RP11-60L3.1 | PRKCQ    | -0.556617102 | 4.43E-37    |
| RP11-60L3.1 | NUAK2    | -0.448378391 | 4.24E-23    |
| RP11-60L3.1 | LIPG     | -0.454798994 | 8.51E-24    |
| RP11-60L3.1 | SLC25A25 | -0.43666894  | 7.27E-22    |
| RP11-60L3.1 | PRKX     | -0.312450593 | 2.14E-11    |

|             |          |              |             |
|-------------|----------|--------------|-------------|
| RP11-60L3.1 | SRPX     | -0.205786349 | 1.39E-05    |
| RP11-60L3.1 | FAM189A1 | -0.462621518 | 1.15E-24    |
| RP11-60L3.1 | PLEKHH1  | -0.42076763  | 2.90E-20    |
| RP11-60L3.1 | WNT11    | -0.374344299 | 4.74E-16    |
| RP11-60L3.1 | SNAI1    | -0.313055349 | 1.95E-11    |
| RP11-60L3.1 | FDCSP    | -0.06763635  | 0.157150922 |
| RP11-60L3.1 | MT1X     | -0.436654467 | 7.29E-22    |
| RP11-60L3.1 | ACACB    | -0.600810695 | 2.03E-44    |
| RP11-60L3.1 | ARC      | -0.086772849 | 0.069318735 |
| RP11-60L3.1 | KLK4     | -0.369214983 | 1.26E-15    |
| RP11-60L3.1 | ZFPM2    | -0.297126795 | 2.13E-10    |
| RP11-60L3.1 | AKAP12   | -0.389172033 | 2.52E-17    |
| RP11-60L3.1 | GJB6     | -0.389970247 | 2.14E-17    |
| RP11-60L3.1 | ERO1LB   | -0.508546513 | 2.99E-30    |
| RP11-60L3.1 | DNALI1   | -0.342252354 | 1.65E-13    |
| RP11-60L3.1 | HKDC1    | -0.452827932 | 1.40E-23    |
| RP11-60L3.1 | ZFP36L2  | -0.456397724 | 5.68E-24    |
| RP11-60L3.1 | CAPSL    | -0.435405906 | 9.81E-22    |
| RP11-60L3.1 | CYP7B1   | -0.524664923 | 2.03E-32    |
| RP11-60L3.1 | CPQ      | -0.410367584 | 2.92E-19    |
| RP11-60L3.1 | RPS6KA6  | -0.475477142 | 3.81E-26    |
| RP11-60L3.1 | TLE1     | -0.565260346 | 1.98E-38    |
| RP11-60L3.1 | TP53INP2 | -0.470961107 | 1.28E-25    |
| RP11-60L3.1 | KATNAL2  | -0.517527893 | 1.91E-31    |
| RP11-60L3.1 | SGPP2    | -0.434141224 | 1.32E-21    |
| RP11-60L3.1 | CTH      | -0.534102637 | 9.59E-34    |
| RP11-60L3.1 | KIF12    | -0.228146006 | 1.36E-06    |
| RP11-60L3.1 | TMEM220  | -0.559465784 | 1.61E-37    |
| RP11-60L3.1 | CENPJ    | -0.449158388 | 3.49E-23    |
| RP11-60L3.1 | FAM155B  | -0.317003149 | 1.05E-11    |
| RP11-60L3.1 | WFS1     | -0.494412362 | 1.93E-28    |
| RP11-60L3.1 | SELENBP1 | -0.388867101 | 2.68E-17    |
| RP11-60L3.1 | SNTA1    | -0.60655829  | 1.85E-45    |
| RP11-60L3.1 | FRAS1    | -0.286074743 | 1.03E-09    |
| RP11-60L3.1 | FBLN7    | -0.550781532 | 3.43E-36    |
| RP11-60L3.1 | AGPAT9   | -0.487824323 | 1.26E-27    |
| RP11-60L3.1 | GPR83    | -0.326925434 | 2.15E-12    |
| RP11-60L3.1 | PRTG     | -0.522531108 | 3.99E-32    |
| RP11-60L3.1 | EGR3     | -0.09144034  | 0.055564233 |
| RP11-60L3.1 | GRAMD2   | -0.336599971 | 4.33E-13    |
| RP11-60L3.1 | HYOU1    | -0.569720103 | 3.85E-39    |
| RP11-60L3.1 | FBLN5    | -0.277963321 | 3.13E-09    |
| RP11-60L3.1 | ITM2A    | -0.406197719 | 7.19E-19    |
| RP11-60L3.1 | SRF      | -0.308917978 | 3.68E-11    |
| RP11-60L3.1 | FGFR2    | -0.3147395   | 1.50E-11    |
| RP11-60L3.1 | MT1A     | -0.300309154 | 1.34E-10    |
| RP11-60L3.1 | MAMDC2   | -0.252084812 | 8.63E-08    |
| RP11-60L3.1 | FHL2     | -0.344966094 | 1.03E-13    |
| RP11-60L3.1 | FTCDNL1  | -0.581809265 | 3.98E-41    |
| RP11-60L3.1 | PKIA     | -0.285505744 | 1.11E-09    |
| RP11-60L3.1 | DNAJB4   | -0.366386407 | 2.15E-15    |



|             |          |              |             |
|-------------|----------|--------------|-------------|
| RP11-60L3.1 | SLC25A33 | -0.532189894 | 1.79E-33    |
| RP11-60L3.1 | EYA2     | -0.478186396 | 1.83E-26    |
| RP11-60L3.1 | LPAR1    | -0.397623152 | 4.42E-18    |
| RP11-60L3.1 | STX11    | -0.4580254   | 3.75E-24    |
| RP11-60L3.1 | ARHGEF28 | -0.571775309 | 1.79E-39    |
| RP11-60L3.1 | OR2W3    | -0.448996911 | 3.64E-23    |
| RP11-60L3.1 | ALDH1B1  | -0.593883052 | 3.41E-43    |
| RP11-60L3.1 | CXCL12   | -0.24603569  | 1.78E-07    |
| RP11-60L3.1 | OLFM2    | -0.309380413 | 3.42E-11    |
| RP11-60L3.1 | TUB      | -0.400523483 | 2.41E-18    |
| RP11-60L3.1 | HTRA3    | -0.171658496 | 0.000302388 |
| RP11-60L3.1 | CKB      | -0.423626386 | 1.52E-20    |
| RP11-60L3.1 | RGS2     | -0.123360166 | 0.009675883 |
| RP11-60L3.1 | SHANK2   | -0.503042694 | 1.55E-29    |
| RP11-60L3.1 | CNTFR    | -0.436885381 | 6.90E-22    |
| RP11-60L3.1 | CYTH3    | -0.520198214 | 8.32E-32    |
| RP11-60L3.1 | PLAC9    | -0.236379174 | 5.45E-07    |
| RP11-60L3.1 | WWOX     | -0.504315775 | 1.06E-29    |
| RP11-60L3.1 | NPR3     | -0.366176119 | 2.24E-15    |
| RP11-60L3.1 | SDC2     | -0.273225308 | 5.90E-09    |
| RP11-60L3.1 | KLF15    | -0.462571571 | 1.16E-24    |
| RP11-60L3.1 | TMEM164  | -0.57762223  | 1.98E-40    |
| RP11-60L3.1 | LONRF3   | -0.291403748 | 4.85E-10    |
| RP11-60L3.1 | GBP1     | -0.252838983 | 7.88E-08    |
| RP11-60L3.1 | ARHGAP6  | -0.496799176 | 9.68E-29    |
| RP11-60L3.1 | TMEM119  | -0.149275142 | 0.001710741 |
| RP11-60L3.1 | SH3RF1   | -0.512791158 | 8.25E-31    |
| RP11-60L3.1 | CRELD2   | -0.442682872 | 1.71E-22    |
| RP11-60L3.1 | PCP4     | -0.091903201 | 0.054333322 |
| RP11-60L3.1 | GCSH     | -0.525974613 | 1.34E-32    |
| RP11-60L3.1 | IMPA2    | -0.43019314  | 3.34E-21    |
| RP11-60L3.1 | C1R      | -0.105749448 | 0.026719216 |
| RP11-60L3.1 | SUCNR1   | -0.33102492  | 1.10E-12    |
| RP11-60L3.1 | SFRP1    | -0.435218065 | 1.03E-21    |
| RP11-60L3.1 | UGT8     | -0.603427947 | 6.85E-45    |
| RP11-60L3.1 | TLE4     | -0.229061086 | 1.23E-06    |
| RP11-60L3.1 | ANTXR1   | -0.429183984 | 4.22E-21    |
| RP11-60L3.1 | GPX3     | -0.406334505 | 6.98E-19    |
| RP11-60L3.1 | DPY19L2  | -0.441389216 | 2.34E-22    |
| RP11-60L3.1 | FAM46C   | -0.525041087 | 1.80E-32    |
| RP11-60L3.1 | IL33     | -0.265508363 | 1.62E-08    |
| RP11-60L3.1 | PEG3     | -0.520783388 | 6.92E-32    |
| RP11-60L3.1 | FAHD2A   | -0.474679038 | 4.73E-26    |
| RP11-60L3.1 | PTGDS    | -0.073986557 | 0.121648097 |
| RP11-60L3.1 | CHCHD10  | -0.466772654 | 3.89E-25    |
| RP11-60L3.1 | CD36     | -0.463116873 | 1.01E-24    |
| RP11-60L3.1 | ANKRD37  | -0.293608795 | 3.54E-10    |
| RP11-60L3.1 | TSPAN33  | -0.495322334 | 1.48E-28    |
| RP11-60L3.1 | PRDM16   | -0.393606391 | 1.02E-17    |
| RP11-60L3.1 | UST      | -0.469852482 | 1.72E-25    |
| RP11-60L3.1 | NEXN     | -0.505588714 | 7.28E-30    |

|             |          |              |             |
|-------------|----------|--------------|-------------|
| RP11-60L3.1 | NUPR1L   | -0.237592531 | 4.75E-07    |
| RP11-60L3.1 | SLC24A3  | -0.59572575  | 1.62E-43    |
| RP11-60L3.1 | MARC1    | -0.473533236 | 6.44E-26    |
| RP11-60L3.1 | MYH11    | -0.25656344  | 4.99E-08    |
| RP11-60L3.1 | APOA1    | -0.367145629 | 1.87E-15    |
| RP11-60L3.1 | TMEM178B | -0.419007707 | 4.31E-20    |
| RP11-60L3.1 | CAPN6    | -0.158320487 | 0.00087239  |
| RP11-60L3.1 | PPM1L    | -0.602973316 | 8.28E-45    |
| RP11-60L3.1 | FZD8     | -0.515855662 | 3.21E-31    |
| RP11-60L3.1 | RCAN2    | -0.55129732  | 2.87E-36    |
| RP11-60L3.1 | COPZ2    | -0.539341539 | 1.69E-34    |
| RP11-60L3.1 | GAS1     | -0.325788714 | 2.59E-12    |
| RP11-60L3.1 | DACT1    | -0.330707075 | 1.16E-12    |
| RP11-60L3.1 | WBSR17   | -0.397832021 | 4.24E-18    |
| RP11-60L3.1 | NCS1     | -0.372583384 | 6.65E-16    |
| RP11-60L3.1 | SPIRE2   | -0.268341143 | 1.12E-08    |
| RP11-60L3.1 | C15orf52 | -0.522718551 | 3.76E-32    |
| RP11-60L3.1 | SPAG5    | -0.368236717 | 1.52E-15    |
| RP11-60L3.1 | ARL4D    | -0.425757931 | 9.32E-21    |
| RP11-60L3.1 | FAM189A2 | -0.290878311 | 5.23E-10    |
| RP11-60L3.1 | MAP1LC3A | -0.457765023 | 4.01E-24    |
| RP11-60L3.1 | KLF6     | -0.093459221 | 0.050360397 |
| RP11-60L3.1 | ADD3     | -0.387247938 | 3.72E-17    |
| RP11-60L3.1 | TSPAN7   | -0.320883833 | 5.70E-12    |
| RP11-60L3.1 | KLF9     | -0.340521378 | 2.22E-13    |
| RP11-60L3.1 | KCNQ1    | -0.554742244 | 8.59E-37    |
| RP11-60L3.1 | MAN1A1   | -0.246982413 | 1.59E-07    |
| RP11-60L3.1 | MLF1     | -0.201066073 | 2.19E-05    |
| RP11-60L3.1 | RARB     | -0.470903072 | 1.30E-25    |
| RP11-60L3.1 | CDC42EP2 | -0.400627067 | 2.35E-18    |
| RP11-60L3.1 | FAM3B    | -0.219895101 | 3.30E-06    |
| RP11-60L3.1 | GADD45B  | -0.219357603 | 3.49E-06    |
| RP11-60L3.1 | TMEM47   | -0.452017854 | 1.71E-23    |
| RP11-60L3.1 | SDF2L1   | -0.395806613 | 6.46E-18    |
| RP11-60L3.1 | CCDC85A  | -0.352879999 | 2.56E-14    |
| RP11-60L3.1 | CRYBG3   | -0.400739731 | 2.30E-18    |
| RP11-60L3.1 | FBLN2    | -0.119762989 | 0.012032039 |
| RP11-60L3.1 | PEBP4    | -0.360070665 | 6.95E-15    |
| RP11-60L3.1 | CDADC1   | -0.531350302 | 2.36E-33    |
| RP11-60L3.1 | FAM63A   | -0.542224843 | 6.42E-35    |
| RP11-60L3.1 | GLUL     | -0.391519259 | 1.56E-17    |
| RP11-60L3.1 | FREM2    | -0.561923545 | 6.65E-38    |
| RP11-60L3.1 | ACKR3    | -0.350082257 | 4.20E-14    |
| RP11-60L3.1 | DENND6A  | -0.547473536 | 1.08E-35    |
| RP11-60L3.1 | CLDN8    | -0.339556351 | 2.62E-13    |
| RP11-60L3.1 | UTS2R    | -0.171712569 | 0.000301043 |
| RP11-60L3.1 | SCNN1B   | -0.245911248 | 1.81E-07    |
| RP11-60L3.1 | TTC30A   | -0.576176605 | 3.43E-40    |
| RP11-60L3.1 | CORO2B   | -0.432419471 | 1.98E-21    |
| RP11-60L3.1 | TC2N     | -0.472215884 | 9.17E-26    |
| RP11-60L3.1 | ALDH2    | -0.590769219 | 1.19E-42    |

|             |          |              |             |
|-------------|----------|--------------|-------------|
| RP11-60L3.1 | GPR183   | -0.111436596 | 0.019518495 |
| RP11-60L3.1 | C4orf47  | -0.322489374 | 4.41E-12    |
| RP11-60L3.1 | SLC25A42 | -0.476961559 | 2.55E-26    |
| RP11-60L3.1 | LGMN     | -0.567333431 | 9.29E-39    |
| RP11-60L3.1 | ACSF2    | -0.568527618 | 5.98E-39    |
| RP11-60L3.1 | KIAA1467 | -0.573775459 | 8.49E-40    |
| RP11-60L3.1 | PRKG1    | -0.524471946 | 2.16E-32    |
| RP11-60L3.1 | GNAI1    | -0.541552262 | 8.06E-35    |
| RP11-60L3.1 | ABCC4    | -0.45106503  | 2.17E-23    |
| RP11-60L3.1 | PRPS1    | -0.615784155 | 3.56E-47    |
| RP11-60L3.1 | TSPAN5   | -0.425992626 | 8.83E-21    |
| RP11-60L3.1 | CR2      | -0.208825909 | 1.03E-05    |
| RP11-60L3.1 | CCDC170  | -0.496609747 | 1.02E-28    |
| RP11-60L3.1 | RRAD     | 0.016973894  | 0.722848703 |
| RP11-60L3.1 | SCGB2A1  | -0.401475882 | 1.97E-18    |
| RP11-60L3.1 | SESN3    | -0.267703184 | 1.22E-08    |
| RP11-60L3.1 | SGK223   | -0.285336747 | 1.14E-09    |
| RP11-60L3.1 | NDRG2    | -0.554533659 | 9.25E-37    |
| RP11-60L3.1 | C3orf52  | -0.33932038  | 2.73E-13    |
| RP11-60L3.1 | FLRT3    | 0.262558642  | 2.35E-08    |
| RP11-60L3.1 | MST1R    | 0.553929612  | 1.14E-36    |
| RP11-60L3.1 | SDC1     | 0.167172063  | 0.00043573  |
| RP11-60L3.1 | ST8SIA4  | 0.338600121  | 3.08E-13    |
| RP11-60L3.1 | UBTD1    | 0.496119925  | 1.18E-28    |
| RP11-60L3.1 | EPHA2    | 0.44459221   | 1.08E-22    |
| RP11-60L3.1 | TMEM130  | 0.476045911  | 3.27E-26    |
| RP11-60L3.1 | SPINK2   | 0.324925142  | 2.98E-12    |
| RP11-60L3.1 | MMP16    | 0.469356844  | 1.96E-25    |
| RP11-60L3.1 | SIGLEC15 | 0.557392132  | 3.37E-37    |
| RP11-60L3.1 | RIN1     | 0.692375619  | 6.30E-64    |
| RP11-60L3.1 | IL1RN    | 0.339060996  | 2.85E-13    |
| RP11-60L3.1 | FCER1G   | 0.240967346  | 3.22E-07    |
| RP11-60L3.1 | CD276    | 0.622157223  | 2.16E-48    |
| RP11-60L3.1 | CTSB     | 0.322195652  | 4.62E-12    |
| RP11-60L3.1 | FAM171A2 | 0.364987465  | 2.80E-15    |
| RP11-60L3.1 | ASPHD1   | 0.548706177  | 7.04E-36    |
| RP11-60L3.1 | C15orf48 | 0.215808954  | 5.05E-06    |
| RP11-60L3.1 | DYSF     | 0.239272979  | 3.92E-07    |
| RP11-60L3.1 | PDZRN4   | 0.341123297  | 2.00E-13    |
| RP11-60L3.1 | EFHD2    | 0.313076775  | 1.94E-11    |
| RP11-60L3.1 | ASF1B    | 0.302896526  | 9.10E-11    |
| RP11-60L3.1 | AQP1     | 0.202023012  | 2.00E-05    |
| RP11-60L3.1 | ARRDC2   | 0.628874102  | 1.05E-49    |
| RP11-60L3.1 | PRSS1    | 0.466902668  | 3.76E-25    |
| RP11-60L3.1 | MAPK13   | 0.39217013   | 1.37E-17    |
| RP11-60L3.1 | CST5     | 0.562486321  | 5.43E-38    |
| RP11-60L3.1 | AHR      | 0.392998513  | 1.15E-17    |
| RP11-60L3.1 | BAX      | 0.448987972  | 3.65E-23    |
| RP11-60L3.1 | C1orf115 | 0.440105777  | 3.19E-22    |
| RP11-60L3.1 | PLK3     | 0.448583997  | 4.03E-23    |
| RP11-60L3.1 | JAG2     | 0.358077609  | 1.00E-14    |

|             |          |              |             |
|-------------|----------|--------------|-------------|
| RP11-60L3.1 | RAD23B   | 0.43289184   | 1.78E-21    |
| RP11-60L3.1 | CA12     | -0.026679222 | 0.577187725 |
| RP11-60L3.1 | ADTRP    | 0.479719145  | 1.20E-26    |
| RP11-60L3.1 | UCP2     | 0.510718357  | 1.55E-30    |
| RP11-60L3.1 | IGFBP2   | 0.365476719  | 2.55E-15    |
| RP11-60L3.1 | LOXL2    | 0.303652825  | 8.13E-11    |
| RP11-60L3.1 | GPX1     | 0.386034169  | 4.75E-17    |
| RP11-60L3.1 | P3H3     | 0.575153117  | 5.05E-40    |
| RP11-60L3.1 | C2orf81  | 0.604576728  | 4.24E-45    |
| RP11-60L3.1 | CDT1     | 0.379570998  | 1.71E-16    |
| RP11-60L3.1 | SNX25    | 0.420493347  | 3.09E-20    |
| RP11-60L3.1 | MTHFD1L  | 0.442469462  | 1.80E-22    |
| RP11-60L3.1 | CDC42BPG | 0.50090173   | 2.92E-29    |
| RP11-60L3.1 | MSN      | 0.418765351  | 4.55E-20    |
| RP11-60L3.1 | SIGLEC6  | 0.563735777  | 3.45E-38    |
| RP11-60L3.1 | F2R      | 0.183746381  | 0.000107966 |
| RP11-60L3.1 | TMEM184A | 0.590127144  | 1.53E-42    |
| RP11-60L3.1 | CKS2     | 0.273336128  | 5.82E-09    |
| RP11-60L3.1 | TAX1BP3  | 0.56747944   | 8.80E-39    |
| RP11-60L3.1 | PMEPA1   | 0.455077676  | 7.93E-24    |
| RP11-60L3.1 | CXCL16   | 0.43548057   | 9.64E-22    |
| RP11-60L3.1 | FAXC     | 0.607804695  | 1.09E-45    |
| RP11-60L3.1 | VTCN1    | 0.468008518  | 2.81E-25    |
| RP11-60L3.1 | SH2D4A   | 0.4575641    | 4.22E-24    |
| RP11-60L3.1 | RNF24    | 0.412446061  | 1.85E-19    |
| RP11-60L3.1 | LY6G6C   | 0.579278278  | 1.05E-40    |
| RP11-60L3.1 | NID1     | 0.3023105    | 9.93E-11    |
| RP11-60L3.1 | STAC     | 0.5094606    | 2.27E-30    |
| RP11-60L3.1 | RAB34    | 0.683799917  | 8.54E-62    |
| RP11-60L3.1 | HES4     | 0.393218308  | 1.10E-17    |
| RP11-60L3.1 | EPHA10   | 0.557613913  | 3.11E-37    |
| RP11-60L3.1 | ENTPD2   | 0.567517326  | 8.68E-39    |
| RP11-60L3.1 | DDB2     | 0.490206739  | 6.43E-28    |
| RP11-60L3.1 | NKAIN4   | 0.490600781  | 5.75E-28    |
| RP11-60L3.1 | TRIM29   | 0.586543872  | 6.31E-42    |
| RP11-60L3.1 | ADCY8    | 0.527095034  | 9.33E-33    |
| RP11-60L3.1 | SFTA2    | 0.354542865  | 1.90E-14    |
| RP11-60L3.1 | NRIP1    | 0.457924939  | 3.85E-24    |
| RP11-60L3.1 | VWA1     | 0.289226512  | 6.61E-10    |
| RP11-60L3.1 | APLNR    | 0.168786685  | 0.00038245  |
| RP11-60L3.1 | REN      | 0.59473915   | 2.42E-43    |
| RP11-60L3.1 | EDIL3    | 0.189913134  | 6.22E-05    |
| RP11-60L3.1 | AGRN     | 0.437408496  | 6.09E-22    |
| RP11-60L3.1 | TREM1    | 0.388442835  | 2.92E-17    |
| RP11-60L3.1 | SRL      | 0.312219163  | 2.22E-11    |
| RP11-60L3.1 | RASGRF1  | 0.706248258  | 1.54E-67    |
| RP11-60L3.1 | RMI2     | 0.447995559  | 4.66E-23    |
| RP11-60L3.1 | SAMD1    | 0.553978566  | 1.12E-36    |
| RP11-60L3.1 | MGAT4B   | 0.575964898  | 3.72E-40    |
| RP11-60L3.1 | NXN      | 0.60350755   | 6.63E-45    |
| RP11-60L3.1 | SH3BGRL3 | 0.464961365  | 6.25E-25    |

|             |          |             |          |
|-------------|----------|-------------|----------|
| RP11-60L3.1 | CA11     | 0.479678846 | 1.21E-26 |
| RP11-60L3.1 | PLD3     | 0.448812306 | 3.81E-23 |
| RP11-60L3.1 | LURAP1L  | 0.283319569 | 1.51E-09 |
| RP11-60L3.1 | CARNS1   | 0.430836634 | 2.87E-21 |
| RP11-60L3.1 | PDLIM7   | 0.546673107 | 1.42E-35 |
| RP11-60L3.1 | BCL2L1   | 0.508527216 | 3.01E-30 |
| RP11-60L3.1 | GGT6     | 0.447383141 | 5.42E-23 |
| RP11-60L3.1 | DPYSL3   | 0.384647572 | 6.27E-17 |
| RP11-60L3.1 | FYN      | 0.561381649 | 8.09E-38 |
| RP11-60L3.1 | TK1      | 0.274787854 | 4.80E-09 |
| RP11-60L3.1 | AK1      | 0.308717764 | 3.79E-11 |
| RP11-60L3.1 | HIGD1B   | 0.201037126 | 2.20E-05 |
| RP11-60L3.1 | TMEM59L  | 0.468638004 | 2.38E-25 |
| RP11-60L3.1 | MEGF9    | 0.315169016 | 1.40E-11 |
| RP11-60L3.1 | ZFP36L1  | 0.446191223 | 7.27E-23 |
| RP11-60L3.1 | ADRA1B   | 0.366453098 | 2.13E-15 |
| RP11-60L3.1 | EPHA4    | 0.447385127 | 5.42E-23 |
| RP11-60L3.1 | TCERG1L  | 0.363387459 | 3.77E-15 |
| RP11-60L3.1 | NGFR     | 0.454304065 | 9.64E-24 |
| RP11-60L3.1 | EBI3     | 0.398429257 | 3.74E-18 |
| RP11-60L3.1 | S100A10  | 0.459332962 | 2.68E-24 |
| RP11-60L3.1 | S100B    | 0.357968492 | 1.02E-14 |
| RP11-60L3.1 | CD44     | 0.325006731 | 2.94E-12 |
| RP11-60L3.1 | BHLHE41  | 0.451713205 | 1.85E-23 |
| RP11-60L3.1 | FBXO2    | 0.491115292 | 4.96E-28 |
| RP11-60L3.1 | SLC30A2  | 0.240469153 | 3.41E-07 |
| RP11-60L3.1 | FRMD5    | 0.318594785 | 8.19E-12 |
| RP11-60L3.1 | SAMD11   | 0.395320907 | 7.14E-18 |
| RP11-60L3.1 | SIPA1L2  | 0.51521302  | 3.92E-31 |
| RP11-60L3.1 | S100A16  | 0.595913618 | 1.50E-43 |
| RP11-60L3.1 | PPL      | 0.442211639 | 1.92E-22 |
| RP11-60L3.1 | ARHGD1B  | 0.301160441 | 1.18E-10 |
| RP11-60L3.1 | CDC42EP3 | 0.439683214 | 3.53E-22 |
| RP11-60L3.1 | RUNX2    | 0.581742432 | 4.09E-41 |
| RP11-60L3.1 | LAMC2    | 0.405621484 | 8.14E-19 |
| RP11-60L3.1 | BRINP1   | 0.474402059 | 5.10E-26 |
| RP11-60L3.1 | GPRC5B   | 0.371818144 | 7.69E-16 |
| RP11-60L3.1 | AQP5     | 0.465906385 | 4.88E-25 |
| RP11-60L3.1 | PLAG1    | 0.526224916 | 1.23E-32 |
| RP11-60L3.1 | PTPRU    | 0.572886771 | 1.18E-39 |
| RP11-60L3.1 | ANGPTL4  | 0.322790901 | 4.20E-12 |
| RP11-60L3.1 | PALM3    | 0.504542523 | 9.94E-30 |
| RP11-60L3.1 | ACP5     | 0.3398146   | 2.51E-13 |
| RP11-60L3.1 | DLG4     | 0.494672597 | 1.79E-28 |
| RP11-60L3.1 | ETNK2    | 0.681168334 | 3.73E-61 |
| RP11-60L3.1 | CD109    | 0.594698147 | 2.46E-43 |
| RP11-60L3.1 | SNX22    | 0.423028867 | 1.74E-20 |
| RP11-60L3.1 | TMEM98   | 0.631329877 | 3.39E-50 |
| RP11-60L3.1 | CTHRC1   | 0.377212705 | 2.72E-16 |
| RP11-60L3.1 | S100A2   | 0.480768174 | 9.00E-27 |
| RP11-60L3.1 | C11orf80 | 0.587819082 | 3.82E-42 |

|             |          |             |             |
|-------------|----------|-------------|-------------|
| RP11-60L3.1 | SREBF1   | 0.546077858 | 1.74E-35    |
| RP11-60L3.1 | PRSS22   | 0.588885564 | 2.51E-42    |
| RP11-60L3.1 | CMTM3    | 0.455312228 | 7.48E-24    |
| RP11-60L3.1 | RDH5     | 0.568159259 | 6.85E-39    |
| RP11-60L3.1 | MYH10    | 0.384032032 | 7.09E-17    |
| RP11-60L3.1 | EVPL     | 0.488404532 | 1.07E-27    |
| RP11-60L3.1 | SCD      | 0.379469401 | 1.75E-16    |
| RP11-60L3.1 | CD151    | 0.645937958 | 3.39E-53    |
| RP11-60L3.1 | S100A4   | 0.5253446   | 1.63E-32    |
| RP11-60L3.1 | BNIP1    | 0.473287474 | 6.88E-26    |
| RP11-60L3.1 | MAP3K6   | 0.516569535 | 2.58E-31    |
| RP11-60L3.1 | MANEAL   | 0.37857149  | 2.08E-16    |
| RP11-60L3.1 | CD207    | 0.421523235 | 2.45E-20    |
| RP11-60L3.1 | CD1A     | 0.410538463 | 2.81E-19    |
| RP11-60L3.1 | C3       | 0.373333582 | 5.75E-16    |
| RP11-60L3.1 | NT5E     | 0.434581524 | 1.19E-21    |
| RP11-60L3.1 | CACNG4   | 0.52204492  | 4.65E-32    |
| RP11-60L3.1 | FHOD1    | 0.565013591 | 2.17E-38    |
| RP11-60L3.1 | LEMD1    | 0.564030543 | 3.10E-38    |
| RP11-60L3.1 | ATP11A   | 0.396884731 | 5.16E-18    |
| RP11-60L3.1 | PPAP2C   | 0.479972569 | 1.12E-26    |
| RP11-60L3.1 | DRAM1    | 0.535445672 | 6.17E-34    |
| RP11-60L3.1 | CDA      | 0.291099383 | 5.07E-10    |
| RP11-60L3.1 | CCND2    | 0.362346943 | 4.57E-15    |
| RP11-60L3.1 | LCN6     | 0.501632773 | 2.35E-29    |
| RP11-60L3.1 | CDH4     | 0.403871778 | 1.18E-18    |
| RP11-60L3.1 | MMP11    | 0.469595936 | 1.84E-25    |
| RP11-60L3.1 | B3GAT1   | 0.468333498 | 2.58E-25    |
| RP11-60L3.1 | SPP1     | 0.232889127 | 8.07E-07    |
| RP11-60L3.1 | HLA-DQB1 | 0.181234557 | 0.000134471 |
| RP11-60L3.1 | SDC3     | 0.588509117 | 2.91E-42    |
| RP11-60L3.1 | CX3CL1   | 0.33065727  | 1.17E-12    |
| RP11-60L3.1 | SDK1     | 0.54619634  | 1.67E-35    |
| RP11-60L3.1 | DOCK9    | 0.455920957 | 6.41E-24    |
| RP11-60L3.1 | CSF2     | 0.586387351 | 6.71E-42    |
| RP11-60L3.1 | GRHL3    | 0.500181525 | 3.61E-29    |
| RP11-60L3.1 | TMEM92   | 0.587744566 | 3.93E-42    |
| RP11-60L3.1 | BASP1    | 0.605904722 | 2.43E-45    |
| RP11-60L3.1 | HRH1     | 0.511210165 | 1.34E-30    |
| RP11-60L3.1 | ESM1     | 0.153996695 | 0.00120913  |
| RP11-60L3.1 | B4GALNT3 | 0.487750822 | 1.29E-27    |
| RP11-60L3.1 | LMO3     | 0.292299105 | 4.27E-10    |
| RP11-60L3.1 | C9orf16  | 0.458512667 | 3.31E-24    |
| RP11-60L3.1 | SEMA3F   | 0.460377734 | 2.05E-24    |
| RP11-60L3.1 | PLA2G12B | 0.393338954 | 1.08E-17    |
| RP11-60L3.1 | KLK6     | 0.672666248 | 3.92E-59    |
| RP11-60L3.1 | ST3GAL5  | 0.509614131 | 2.17E-30    |
| RP11-60L3.1 | FAM132B  | 0.292782399 | 3.99E-10    |
| RP11-60L3.1 | CDKN1A   | 0.216496009 | 4.70E-06    |
| RP11-60L3.1 | E2F1     | 0.365784347 | 2.41E-15    |
| RP11-60L3.1 | B3GNT8   | 0.539952822 | 1.38E-34    |

|             |          |             |          |
|-------------|----------|-------------|----------|
| RP11-60L3.1 | MTMR11   | 0.585265115 | 1.04E-41 |
| RP11-60L3.1 | MYO1G    | 0.522236392 | 4.38E-32 |
| RP11-60L3.1 | TMSB10   | 0.555054129 | 7.70E-37 |
| RP11-60L3.1 | UNC5CL   | 0.553116554 | 1.52E-36 |
| RP11-60L3.1 | ABR      | 0.431552352 | 2.43E-21 |
| RP11-60L3.1 | PLP2     | 0.536623684 | 4.18E-34 |
| RP11-60L3.1 | SRCIN1   | 0.44252551  | 1.78E-22 |
| RP11-60L3.1 | PDE9A    | 0.624014911 | 9.41E-49 |
| RP11-60L3.1 | TREM2    | 0.26081972  | 2.93E-08 |
| RP11-60L3.1 | KDELR3   | 0.331380651 | 1.04E-12 |
| RP11-60L3.1 | PC       | 0.517024308 | 2.24E-31 |
| RP11-60L3.1 | C2CD4A   | 0.419625376 | 3.75E-20 |
| RP11-60L3.1 | PELI1    | 0.506838241 | 5.01E-30 |
| RP11-60L3.1 | SSX1     | 0.461992924 | 1.35E-24 |
| RP11-60L3.1 | MROH6    | 0.597696102 | 7.27E-44 |
| RP11-60L3.1 | ESPN     | 0.619540539 | 6.88E-48 |
| RP11-60L3.1 | BMP1     | 0.574370425 | 6.79E-40 |
| RP11-60L3.1 | TM4SF4   | 0.557244956 | 3.55E-37 |
| RP11-60L3.1 | CORO2A   | 0.500240979 | 3.55E-29 |
| RP11-60L3.1 | CD164L2  | 0.471863008 | 1.01E-25 |
| RP11-60L3.1 | CTSS     | 0.277045119 | 3.54E-09 |
| RP11-60L3.1 | CLU      | 0.560584909 | 1.08E-37 |
| RP11-60L3.1 | TMSB4X   | 0.451217708 | 2.09E-23 |
| RP11-60L3.1 | WNT10A   | 0.639177823 | 8.69E-52 |
| RP11-60L3.1 | NAPSA    | 0.449787692 | 2.99E-23 |
| RP11-60L3.1 | PLEKHA4  | 0.608768162 | 7.26E-46 |
| RP11-60L3.1 | SFTPA1   | 0.259242132 | 3.57E-08 |
| RP11-60L3.1 | C1orf116 | 0.563364062 | 3.95E-38 |
| RP11-60L3.1 | TM4SF1   | 0.491294363 | 4.72E-28 |
| RP11-60L3.1 | SEL1L3   | 0.474721322 | 4.68E-26 |
| RP11-60L3.1 | VASN     | 0.583863052 | 1.80E-41 |
| RP11-60L3.1 | NPTXR    | 0.475462581 | 3.83E-26 |
| RP11-60L3.1 | PDE4C    | 0.527456847 | 8.31E-33 |
| RP11-60L3.1 | CDC42EP1 | 0.647937399 | 1.28E-53 |
| RP11-60L3.1 | ENDOD1   | 0.487488033 | 1.39E-27 |
| RP11-60L3.1 | RYR1     | 0.596422028 | 1.22E-43 |
| RP11-60L3.1 | IL1RAP   | 0.527982568 | 7.01E-33 |
| RP11-60L3.1 | SLC35F2  | 0.604537232 | 4.31E-45 |
| RP11-60L3.1 | ISYNA1   | 0.615813527 | 3.52E-47 |
| RP11-60L3.1 | HLA-G    | 0.407593681 | 5.32E-19 |
| RP11-60L3.1 | CDKN2B   | 0.431766187 | 2.31E-21 |
| RP11-60L3.1 | ALDH1A3  | 0.374631211 | 4.48E-16 |
| RP11-60L3.1 | CLIP3    | 0.560772068 | 1.01E-37 |
| RP11-60L3.1 | ULBP2    | 0.391000207 | 1.74E-17 |
| RP11-60L3.1 | ETHE1    | 0.526127718 | 1.27E-32 |
| RP11-60L3.1 | XPR1     | 0.471132375 | 1.22E-25 |
| RP11-60L3.1 | SPTBN2   | 0.495419674 | 1.44E-28 |
| RP11-60L3.1 | IVL      | 0.486135154 | 2.03E-27 |
| RP11-60L3.1 | MARCO    | 0.350744055 | 3.74E-14 |
| RP11-60L3.1 | PLXND1   | 0.44362179  | 1.36E-22 |
| RP11-60L3.1 | EMILIN2  | 0.43432285  | 1.27E-21 |

|             |          |             |          |
|-------------|----------|-------------|----------|
| RP11-60L3.1 | PLAUR    | 0.468343572 | 2.57E-25 |
| RP11-60L3.1 | CDC42EP5 | 0.631809624 | 2.72E-50 |
| RP11-60L3.1 | TRPC5    | 0.458037237 | 3.74E-24 |
| RP11-60L3.1 | TMEM100  | 0.3990211   | 3.30E-18 |
| RP11-60L3.1 | QSOX1    | 0.636333091 | 3.32E-51 |
| RP11-60L3.1 | ARHGAP23 | 0.613918095 | 8.00E-47 |
| RP11-60L3.1 | MDFI     | 0.524867123 | 1.90E-32 |
| RP11-60L3.1 | FSTL3    | 0.625144111 | 5.66E-49 |
| RP11-60L3.1 | INF2     | 0.619891445 | 5.89E-48 |
| RP11-60L3.1 | TGFBR1   | 0.51180513  | 1.11E-30 |
| RP11-60L3.1 | TGFBI    | 0.336292627 | 4.56E-13 |
| RP11-60L3.1 | ERBB3    | 0.567508103 | 8.71E-39 |
| RP11-60L3.1 | CCL18    | 0.365457563 | 2.56E-15 |
| RP11-60L3.1 | CCL17    | 0.421864563 | 2.26E-20 |
| RP11-60L3.1 | C16orf45 | 0.513215991 | 7.24E-31 |
| RP11-60L3.1 | PRDM1    | 0.375353598 | 3.90E-16 |
| RP11-60L3.1 | TRIM47   | 0.524052221 | 2.46E-32 |
| RP11-60L3.1 | CNFN     | 0.50346171  | 1.37E-29 |
| RP11-60L3.1 | ARMCX3   | 0.50815914  | 3.37E-30 |
| RP11-60L3.1 | RAMP1    | 0.578195202 | 1.59E-40 |
| RP11-60L3.1 | GABRD    | 0.274294344 | 5.12E-09 |
| RP11-60L3.1 | COL13A1  | 0.404462486 | 1.04E-18 |
| RP11-60L3.1 | S100A5   | 0.564456795 | 2.66E-38 |
| RP11-60L3.1 | MISP     | 0.514205424 | 5.34E-31 |
| RP11-60L3.1 | HES6     | 0.363023782 | 4.03E-15 |
| RP11-60L3.1 | PSD3     | 0.366498504 | 2.11E-15 |
| RP11-60L3.1 | DOK7     | 0.655980286 | 2.35E-55 |
| RP11-60L3.1 | ZMAT3    | 0.388162451 | 3.09E-17 |
| RP11-60L3.1 | MFAP2    | 0.579352638 | 1.02E-40 |
| RP11-60L3.1 | TMEM79   | 0.606657049 | 1.77E-45 |
| RP11-60L3.1 | SLC1A5   | 0.505992547 | 6.45E-30 |
| RP11-60L3.1 | BBC3     | 0.537318543 | 3.32E-34 |
| RP11-60L3.1 | HLA-DQB2 | 0.312823067 | 2.02E-11 |
| RP11-60L3.1 | C1QL1    | 0.59203109  | 7.17E-43 |
| RP11-60L3.1 | TMEM215  | 0.320437878 | 6.12E-12 |
| RP11-60L3.1 | PNP      | 0.449281552 | 3.39E-23 |
| RP11-60L3.1 | ARNTL    | 0.545796338 | 1.91E-35 |
| RP11-60L3.1 | CLDN2    | 0.38279607  | 9.06E-17 |
| RP11-60L3.1 | MVP      | 0.506510038 | 5.52E-30 |
| RP11-60L3.1 | LGALS1   | 0.4909077   | 5.27E-28 |
| RP11-60L3.1 | BIRC7    | 0.605372478 | 3.04E-45 |
| RP11-60L3.1 | COL8A1   | 0.424381693 | 1.28E-20 |
| RP11-60L3.1 | PERP     | 0.534734779 | 7.79E-34 |
| RP11-60L3.1 | GJA4     | 0.405195373 | 8.92E-19 |
| RP11-60L3.1 | IGFL2    | 0.568491708 | 6.06E-39 |
| RP11-60L3.1 | DAPK2    | 0.576207538 | 3.39E-40 |
| RP11-60L3.1 | MAMLD1   | 0.509040875 | 2.58E-30 |
| RP11-60L3.1 | ETV5     | 0.377409797 | 2.61E-16 |
| RP11-60L3.1 | RUNX1    | 0.521249371 | 5.98E-32 |
| RP11-60L3.1 | LONRF2   | 0.434681986 | 1.16E-21 |
| RP11-60L3.1 | SPOCK1   | 0.358283641 | 9.63E-15 |



|             |           |             |          |
|-------------|-----------|-------------|----------|
| RP11-60L3.1 | XKRX      | 0.51445374  | 4.95E-31 |
| RP11-60L3.1 | TGFB1     | 0.421203673 | 2.63E-20 |
| RP11-60L3.1 | ERP27     | 0.334957963 | 5.70E-13 |
| RP11-60L3.1 | TNFRSF10C | 0.305318813 | 6.34E-11 |
| RP11-60L3.1 | PALM      | 0.69552072  | 9.96E-65 |
| RP11-60L3.1 | TSC22D1   | 0.541980784 | 6.97E-35 |
| RP11-60L3.1 | TGM2      | 0.359538134 | 7.66E-15 |
| RP11-60L3.1 | UBE2QL1   | 0.417240264 | 6.40E-20 |
| RP11-60L3.1 | ECE1      | 0.596403156 | 1.23E-43 |
| RP11-60L3.1 | COL8A2    | 0.602118115 | 1.18E-44 |
| RP11-60L3.1 | HIST3H2A  | 0.450328027 | 2.61E-23 |
| RP11-60L3.1 | TNFRSF21  | 0.493746024 | 2.34E-28 |
| RP11-60L3.1 | SOX4      | 0.59996415  | 2.87E-44 |
| RP11-60L3.1 | ELF3      | 0.596677722 | 1.10E-43 |
| RP11-60L3.1 | TPD52L1   | 0.483301282 | 4.47E-27 |
| RP11-60L3.1 | INHBB     | 0.532554564 | 1.59E-33 |
| RP11-60L3.1 | HPN       | 0.49304336  | 2.86E-28 |
| RP11-60L3.1 | MMP7      | 0.393509548 | 1.04E-17 |
| RP11-60L3.1 | RAB27A    | 0.513647635 | 6.34E-31 |
| RP11-60L3.1 | IGF2BP2   | 0.591164112 | 1.01E-42 |
| RP11-60L3.1 | ITGB4     | 0.632620979 | 1.87E-50 |
| RP11-60L3.1 | PPP1R1B   | 0.676349157 | 5.32E-60 |
| RP11-60L3.1 | NPDC1     | 0.515474674 | 3.61E-31 |
| RP11-60L3.1 | CCL13     | 0.459548663 | 2.54E-24 |
| RP11-60L3.1 | SPINT1    | 0.571763248 | 1.80E-39 |
| RP11-60L3.1 | HEY2      | 0.474790567 | 4.59E-26 |
| RP11-60L3.1 | CST2      | 0.483499713 | 4.23E-27 |
| RP11-60L3.1 | ADM       | 0.312942401 | 1.98E-11 |
| RP11-60L3.1 | VSTM2L    | 0.314640457 | 1.52E-11 |
| RP11-60L3.1 | FAM84A    | 0.479239256 | 1.37E-26 |
| RP11-60L3.1 | P4HA2     | 0.386866808 | 4.02E-17 |
| RP11-60L3.1 | LPL       | 0.516266731 | 2.83E-31 |
| RP11-60L3.1 | TMEM173   | 0.545326098 | 2.24E-35 |
| RP11-60L3.1 | DHRS3     | 0.636130891 | 3.65E-51 |
| RP11-60L3.1 | SCN1B     | 0.501505688 | 2.44E-29 |
| RP11-60L3.1 | GLT1D1    | 0.401964001 | 1.78E-18 |
| RP11-60L3.1 | PHYHIP    | 0.506030859 | 6.38E-30 |
| RP11-60L3.1 | BHLHE40   | 0.48565319  | 2.32E-27 |
| RP11-60L3.1 | BID       | 0.630609051 | 4.72E-50 |
| RP11-60L3.1 | POSTN     | 0.252634938 | 8.07E-08 |
| RP11-60L3.1 | ITGA3     | 0.510661457 | 1.58E-30 |
| RP11-60L3.1 | RSPO4     | 0.566325125 | 1.34E-38 |
| RP11-60L3.1 | ADAMTS9   | 0.346153187 | 8.39E-14 |
| RP11-60L3.1 | ABTB2     | 0.535061279 | 7.00E-34 |
| RP11-60L3.1 | KCNQ3     | 0.527819673 | 7.39E-33 |
| RP11-60L3.1 | ANXA1     | 0.537807939 | 2.82E-34 |
| RP11-60L3.1 | S100A11   | 0.547091271 | 1.23E-35 |
| RP11-60L3.1 | CEACAM6   | 0.470604683 | 1.41E-25 |
| RP11-60L3.1 | IER5L     | 0.481148594 | 8.10E-27 |
| RP11-60L3.1 | KRT80     | 0.503333295 | 1.42E-29 |
| RP11-60L3.1 | CDH6      | 0.439729471 | 3.50E-22 |

|             |            |             |          |
|-------------|------------|-------------|----------|
| RP11-60L3.1 | UNC5B      | 0.427352972 | 6.45E-21 |
| RP11-60L3.1 | PLEKHN1    | 0.622276698 | 2.04E-48 |
| RP11-60L3.1 | SYTL1      | 0.542088482 | 6.72E-35 |
| RP11-60L3.1 | TMEM163    | 0.553051283 | 1.56E-36 |
| RP11-60L3.1 | C4orf48    | 0.347187459 | 7.00E-14 |
| RP11-60L3.1 | B3GNT7     | 0.452260494 | 1.61E-23 |
| RP11-60L3.1 | BAIAP3     | 0.660883038 | 1.93E-56 |
| RP11-60L3.1 | PHLDA2     | 0.411317996 | 2.37E-19 |
| RP11-60L3.1 | GAP43      | 0.591893477 | 7.58E-43 |
| RP11-60L3.1 | S100A1     | 0.371931235 | 7.53E-16 |
| RP11-60L3.1 | PTPRE      | 0.560660539 | 1.05E-37 |
| RP11-60L3.1 | CCND1      | 0.42640781  | 8.02E-21 |
| RP11-60L3.1 | ST6GALNAC5 | 0.502828789 | 1.65E-29 |
| RP11-60L3.1 | KRT17      | 0.477547443 | 2.17E-26 |
| RP11-60L3.1 | HPCAL4     | 0.561100839 | 8.95E-38 |
| RP11-60L3.1 | GABBR2     | 0.3071599   | 4.80E-11 |
| RP11-60L3.1 | DIRAS3     | 0.522043699 | 4.65E-32 |
| RP11-60L3.1 | SERINC2    | 0.388150106 | 3.10E-17 |
| RP11-60L3.1 | PTCHD4     | 0.411701822 | 2.18E-19 |
| RP11-60L3.1 | EPS8       | 0.423061077 | 1.73E-20 |
| RP11-60L3.1 | LY6E       | 0.63330023  | 1.37E-50 |
| RP11-60L3.1 | UPP1       | 0.597754705 | 7.10E-44 |
| RP11-60L3.1 | AHNAK2     | 0.534396643 | 8.71E-34 |
| RP11-60L3.1 | PLXNC1     | 0.447433655 | 5.35E-23 |
| RP11-60L3.1 | TNC        | 0.324661359 | 3.11E-12 |
| RP11-60L3.1 | DUSP4      | 0.472117835 | 9.41E-26 |
| RP11-60L3.1 | NRCAM      | 0.420023107 | 3.43E-20 |
| RP11-60L3.1 | NRP2       | 0.533836442 | 1.05E-33 |
| RP11-60L3.1 | CTSC       | 0.486637656 | 1.76E-27 |
| RP11-60L3.1 | AMIGO2     | 0.556337143 | 4.89E-37 |
| RP11-60L3.1 | NAB2       | 0.561398392 | 8.04E-38 |
| RP11-60L3.1 | TBC1D2     | 0.535494626 | 6.07E-34 |
| RP11-60L3.1 | PHLDA3     | 0.502408991 | 1.87E-29 |
| RP11-60L3.1 | PTP4A3     | 0.457707414 | 4.07E-24 |
| RP11-60L3.1 | CRABP2     | 0.425857825 | 9.10E-21 |
| RP11-60L3.1 | GOS2       | 0.41981367  | 3.60E-20 |
| RP11-60L3.1 | S100A6     | 0.569088387 | 4.86E-39 |
| RP11-60L3.1 | FOXQ1      | 0.555699751 | 6.13E-37 |
| RP11-60L3.1 | LRG1       | 0.541473794 | 8.27E-35 |
| RP11-60L3.1 | LAMP5      | 0.499091772 | 4.97E-29 |
| RP11-60L3.1 | ALDH3B1    | 0.591910763 | 7.53E-43 |
| RP11-60L3.1 | CDH2       | 0.2269609   | 1.55E-06 |
| RP11-60L3.1 | SCG5       | 0.44154303  | 2.26E-22 |
| RP11-60L3.1 | ZCCHC16    | 0.465594162 | 5.29E-25 |
| RP11-60L3.1 | GRB7       | 0.668481085 | 3.66E-58 |
| RP11-60L3.1 | TIAM1      | 0.490358566 | 6.16E-28 |
| RP11-60L3.1 | FXYD5      | 0.499803659 | 4.03E-29 |
| RP11-60L3.1 | CLDN9      | 0.477593985 | 2.15E-26 |
| RP11-60L3.1 | FAM43A     | 0.548774996 | 6.87E-36 |
| RP11-60L3.1 | CHST2      | 0.591171633 | 1.01E-42 |
| RP11-60L3.1 | HMGA2      | 0.515921643 | 3.15E-31 |

|             |         |             |           |
|-------------|---------|-------------|-----------|
| RP11-60L3.1 | GALNT7  | 0.45990565  | 2.32E-24  |
| RP11-60L3.1 | CBLN1   | 0.461841806 | 1.41E-24  |
| RP11-60L3.1 | STRA6   | 0.931497054 | 4.81E-194 |
| RP11-60L3.1 | MUC21   | 0.482545813 | 5.51E-27  |
| RP11-60L3.1 | PRR36   | 0.651800913 | 1.90E-54  |
| RP11-60L3.1 | NFE2L3  | 0.48552293  | 2.41E-27  |
| RP11-60L3.1 | NR1D1   | 0.411537934 | 2.26E-19  |
| RP11-60L3.1 | MUC1    | 0.491199294 | 4.85E-28  |
| RP11-60L3.1 | NAT8L   | 0.448444231 | 4.17E-23  |
| RP11-60L3.1 | APOC1   | 0.430113112 | 3.40E-21  |
| RP11-60L3.1 | EVA1A   | 0.603267748 | 7.32E-45  |
| RP11-60L3.1 | ENTPD1  | 0.384892341 | 5.97E-17  |
| RP11-60L3.1 | COL1A1  | 0.402827005 | 1.48E-18  |
| RP11-60L3.1 | FNDC4   | 0.453074829 | 1.31E-23  |
| RP11-60L3.1 | FRMD3   | 0.285769669 | 1.07E-09  |
| RP11-60L3.1 | SHROOM4 | 0.549263682 | 5.81E-36  |
| RP11-60L3.1 | NELL2   | 0.52719193  | 9.04E-33  |
| RP11-60L3.1 | EPHB3   | 0.608174899 | 9.34E-46  |
| RP11-60L3.1 | TMC6    | 0.614624164 | 5.90E-47  |
| RP11-60L3.1 | NOD1    | 0.63767116  | 1.77E-51  |
| RP11-60L3.1 | GGCT    | 0.607941624 | 1.03E-45  |
| RP11-60L3.1 | ICAM1   | 0.497469913 | 7.97E-29  |
| RP11-60L3.1 | PRSS23  | 0.526482029 | 1.14E-32  |
| RP11-60L3.1 | CFI     | 0.540339486 | 1.21E-34  |
| RP11-60L3.1 | CD55    | 0.57629154  | 3.29E-40  |
| RP11-60L3.1 | RASD2   | 0.620089672 | 5.40E-48  |
| RP11-60L3.1 | KLK11   | 0.635596409 | 4.69E-51  |
| RP11-60L3.1 | ICAM5   | 0.644445223 | 6.99E-53  |
| RP11-60L3.1 | ADORA1  | 0.411456344 | 2.30E-19  |
| RP11-60L3.1 | ITGA2   | 0.46125209  | 1.64E-24  |
| RP11-60L3.1 | ABCC3   | 0.537157776 | 3.50E-34  |
| RP11-60L3.1 | MFGE8   | 0.553061215 | 1.55E-36  |
| RP11-60L3.1 | STK32A  | 0.336912423 | 4.10E-13  |
| RP11-60L3.1 | CYSLTR2 | 0.563072327 | 4.39E-38  |
| RP11-60L3.1 | LAD1    | 0.591835985 | 7.76E-43  |
| RP11-60L3.1 | MGAT3   | 0.554627026 | 8.95E-37  |
| RP11-60L3.1 | IGFBP6  | 0.586792898 | 5.72E-42  |
| RP11-60L3.1 | CYP2S1  | 0.588447109 | 2.98E-42  |
| RP11-60L3.1 | KCNJ2   | 0.4943478   | 1.97E-28  |
| RP11-60L3.1 | FAM20A  | 0.567178907 | 9.83E-39  |
| RP11-60L3.1 | TGFA    | 0.488831919 | 9.49E-28  |
| RP11-60L3.1 | MXRA8   | 0.734419221 | 1.43E-75  |
| RP11-60L3.1 | C8orf4  | 0.380871465 | 1.33E-16  |
| RP11-60L3.1 | CLDN10  | 0.57677451  | 2.74E-40  |
| RP11-60L3.1 | PDE5A   | 0.517267232 | 2.08E-31  |
| RP11-60L3.1 | APOE    | 0.45527647  | 7.54E-24  |
| RP11-60L3.1 | SPOCK2  | 0.522349198 | 4.23E-32  |
| RP11-60L3.1 | TENM1   | 0.419861631 | 3.56E-20  |
| RP11-60L3.1 | SLIT1   | 0.383242529 | 8.29E-17  |
| RP11-60L3.1 | CXCL14  | 0.546920004 | 1.30E-35  |
| RP11-60L3.1 | ECM1    | 0.312263576 | 2.20E-11  |

|             |           |             |             |
|-------------|-----------|-------------|-------------|
| RP11-60L3.1 | DUSP5     | 0.557806039 | 2.91E-37    |
| RP11-60L3.1 | SEZ6L2    | 0.465841539 | 4.96E-25    |
| RP11-60L3.1 | THRSP     | 0.160934363 | 0.000713284 |
| RP11-60L3.1 | C19orf33  | 0.611587897 | 2.18E-46    |
| RP11-60L3.1 | MPZL2     | 0.513484882 | 6.67E-31    |
| RP11-60L3.1 | CTSH      | 0.566360031 | 1.33E-38    |
| RP11-60L3.1 | CYP1B1    | 0.472365441 | 8.81E-26    |
| RP11-60L3.1 | ALOX5     | 0.425750695 | 9.33E-21    |
| RP11-60L3.1 | SYTL5     | 0.53816681  | 2.50E-34    |
| RP11-60L3.1 | TNFRSF12A | 0.568580403 | 5.87E-39    |
| RP11-60L3.1 | DUSP6     | 0.533581883 | 1.14E-33    |
| RP11-60L3.1 | ALOX15B   | 0.48562552  | 2.34E-27    |
| RP11-60L3.1 | SDC4      | 0.656191567 | 2.11E-55    |
| RP11-60L3.1 | MDK       | 0.65310961  | 9.91E-55    |
| RP11-60L3.1 | KRT19     | 0.598709232 | 4.81E-44    |
| RP11-60L3.1 | MET       | 0.514572932 | 4.77E-31    |
| RP11-60L3.1 | TESC      | 0.50647428  | 5.58E-30    |
| RP11-60L3.1 | CXCL17    | 0.452399    | 1.56E-23    |
| RP11-60L3.1 | NPC2      | 0.505058737 | 8.52E-30    |
| RP11-60L3.1 | COMP      | 0.55462589  | 8.95E-37    |
| RP11-60L3.1 | TUSC3     | 0.639389933 | 7.85E-52    |
| RP11-60L3.1 | TMPRSS4   | 0.612449341 | 1.51E-46    |
| RP11-60L3.1 | LGALS3    | 0.626276716 | 3.40E-49    |
| RP11-60L3.1 | CRLF1     | 0.486181748 | 2.00E-27    |
| RP11-60L3.1 | CTXN1     | 0.649106187 | 7.20E-54    |
| RP11-60L3.1 | PCSK1N    | 0.449213159 | 3.45E-23    |
| RP11-60L3.1 | NMU       | 0.512735891 | 8.39E-31    |
| RP11-60L3.1 | GALE      | 0.668191052 | 4.27E-58    |
| RP11-60L3.1 | PCSK2     | 0.207589975 | 1.16E-05    |
| RP11-60L3.1 | GJB3      | 0.600311935 | 2.49E-44    |
| RP11-60L3.1 | SLPI      | 0.45850316  | 3.32E-24    |
| RP11-60L3.1 | AGR2      | 0.381949866 | 1.07E-16    |
| RP11-60L3.1 | MRC2      | 0.558508277 | 2.26E-37    |
| RP11-60L3.1 | GOLT1A    | 0.628937529 | 1.02E-49    |
| RP11-60L3.1 | SLC27A6   | 0.589632519 | 1.86E-42    |
| RP11-60L3.1 | KCNN4     | 0.588136642 | 3.37E-42    |
| RP11-60L3.1 | ETV4      | 0.665138987 | 2.12E-57    |
| RP11-60L3.1 | SYT12     | 0.654450233 | 5.07E-55    |
| RP11-60L3.1 | PVRL4     | 0.597570525 | 7.66E-44    |
| RP11-60L3.1 | PLCD3     | 0.600293347 | 2.51E-44    |
| RP11-60L3.1 | PLAU      | 0.418719518 | 4.60E-20    |
| RP11-60L3.1 | LRRK2     | 0.318343205 | 8.52E-12    |
| RP11-60L3.1 | SFN       | 0.545265935 | 2.29E-35    |
| RP11-60L3.1 | LPAR5     | 0.595965126 | 1.47E-43    |
| RP11-60L3.1 | NGEF      | 0.655064922 | 3.72E-55    |
| RP11-60L3.1 | DTX4      | 0.537332733 | 3.30E-34    |
| RP11-60L3.1 | CST6      | 0.619008433 | 8.69E-48    |
| RP11-60L3.1 | QPCT      | 0.552598212 | 1.82E-36    |
| RP11-60L3.1 | TIMP1     | 0.655414267 | 3.12E-55    |
| RP11-60L3.1 | CAMK2N1   | 0.634209776 | 8.95E-51    |
| RP11-60L3.1 | KLHDC8A   | 0.394270743 | 8.87E-18    |

|               |          |              |             |
|---------------|----------|--------------|-------------|
| RP11-60L3.1   | PDLIM4   | 0.634659725  | 7.26E-51    |
| RP11-60L3.1   | SCEL     | 0.440604395  | 2.83E-22    |
| RP11-60L3.1   | LCN2     | 0.438268096  | 4.96E-22    |
| RP11-60L3.1   | PROS1    | 0.491371412  | 4.61E-28    |
| RP11-60L3.1   | GABRB2   | 0.535756848  | 5.56E-34    |
| RP11-60L3.1   | TMPRSS6  | 0.652077892  | 1.66E-54    |
| RP11-60L3.1   | KLK7     | 0.583540123  | 2.04E-41    |
| RP11-60L3.1   | PDZK1IP1 | 0.408533735  | 4.34E-19    |
| RP11-60L3.1   | CDH3     | 0.638462224  | 1.22E-51    |
| RP11-60L3.1   | LRP4     | 0.495473452  | 1.42E-28    |
| RP11-60L3.1   | IGSF1    | 0.49037006   | 6.14E-28    |
| RP11-60L3.1   | B3GNT3   | 0.53148496   | 2.26E-33    |
| RP11-60L3.1   | CLDN1    | 0.484407352  | 3.28E-27    |
| RP11-60L3.1   | GDF15    | 0.468149744  | 2.70E-25    |
| RP11-60L3.1   | ARHGAP36 | 0.419656392  | 3.73E-20    |
| RP11-60L3.1   | LAMB3    | 0.605334163  | 3.09E-45    |
| RP11-60L3.1   | KLK10    | 0.618350324  | 1.16E-47    |
| RP11-60L3.1   | DPP4     | 0.44531786   | 9.01E-23    |
| RP11-60L3.1   | METTL7B  | 0.542308278  | 6.24E-35    |
| RP11-60L3.1   | LIPH     | 0.542099976  | 6.70E-35    |
| RP11-60L3.1   | CLDN16   | 0.412634923  | 1.77E-19    |
| RP11-60L3.1   | CHI3L1   | 0.428069116  | 5.47E-21    |
| RP11-60L3.1   | SLC22A31 | 0.642302696  | 1.96E-52    |
| RP11-60L3.1   | TACSTD2  | 0.598221397  | 5.87E-44    |
| RP11-60L3.1   | SFTPB    | 0.508001211  | 3.53E-30    |
| RP11-60L3.1   | RXRG     | 0.518797143  | 1.29E-31    |
| RP11-60L3.1   | DCSTAMP  | 0.550394416  | 3.93E-36    |
| RP11-60L3.1   | CITED1   | 0.431071612  | 2.72E-21    |
| RP11-60L3.1   | SERPINA1 | 0.598570033  | 5.09E-44    |
| RP11-60L3.1   | PRR15    | 0.597278364  | 8.62E-44    |
| RP11-60L3.1   | SLC34A2  | 0.466071693  | 4.67E-25    |
| RP11-60L3.1   | FN1      | 0.510148507  | 1.84E-30    |
| RP11-60L3.1   | ZCCHC12  | 0.493916439  | 2.23E-28    |
| RP11-519G16.5 | TFF3     | -0.399713773 | 0           |
| RP11-519G16.5 | CCL21    | -0.14408757  | 0.002476743 |
| RP11-519G16.5 | TPO      | -0.387986962 | 0           |
| RP11-519G16.5 | MT1G     | -0.298564608 | 2.12E-10    |
| RP11-519G16.5 | DIO1     | -0.420364975 | 0           |
| RP11-519G16.5 | DPT      | -0.087435531 | 0.06721089  |
| RP11-519G16.5 | CDH16    | -0.3350854   | 7.56E-13    |
| RP11-519G16.5 | CRABP1   | -0.389261929 | 2.47E-17    |
| RP11-519G16.5 | SLC26A7  | -0.470674748 | 0           |
| RP11-519G16.5 | MT1H     | -0.238160037 | 4.45E-07    |
| RP11-519G16.5 | SLC26A4  | -0.415635132 | 0           |
| RP11-519G16.5 | SLC5A8   | -0.384904853 | 5.95E-17    |
| RP11-519G16.5 | PKHD1L1  | -0.361755093 | 5.09E-15    |
| RP11-519G16.5 | TFCP2L1  | -0.426354474 | 0           |
| RP11-519G16.5 | WSCD2    | -0.419817783 | 3.59E-20    |
| RP11-519G16.5 | IPCEF1   | -0.36780368  | 1.78E-15    |
| RP11-519G16.5 | SLC5A5   | -0.261197593 | 2.80E-08    |
| RP11-519G16.5 | MT1F     | -0.292786873 | 4.82E-10    |

|               |           |              |             |
|---------------|-----------|--------------|-------------|
| RP11-519G16.5 | FOSB      | -0.31765461  | 1.23E-11    |
| RP11-519G16.5 | SEMA3D    | -0.368031129 | 1.58E-15    |
| RP11-519G16.5 | BMP8A     | -0.363647852 | 4.27E-15    |
| RP11-519G16.5 | MATN2     | -0.477831424 | 0           |
| RP11-519G16.5 | PLA2R1    | -0.395233705 | 0           |
| RP11-519G16.5 | COL23A1   | -0.326822962 | 2.91E-12    |
| RP11-519G16.5 | HGD       | -0.399037068 | 0           |
| RP11-519G16.5 | TCEAL2    | -0.304656655 | 8.76E-11    |
| RP11-519G16.5 | CHRD1     | -0.184985695 | 9.68E-05    |
| RP11-519G16.5 | TNFRSF11B | -0.375278214 | 2.89E-16    |
| RP11-519G16.5 | FAM167A   | -0.549741147 | 0           |
| RP11-519G16.5 | KIT       | -0.38057654  | 4.44E-17    |
| RP11-519G16.5 | SLC4A4    | -0.468723352 | 0           |
| RP11-519G16.5 | SMOC2     | -0.25224897  | 9.38E-08    |
| RP11-519G16.5 | FHL1      | -0.530411867 | 0           |
| RP11-519G16.5 | OTOS      | -0.240630806 | 3.64E-07    |
| RP11-519G16.5 | IGFBPL1   | -0.428897958 | 4.51E-21    |
| RP11-519G16.5 | HBB       | -0.326310362 | 3.16E-12    |
| RP11-519G16.5 | BEX1      | -0.433069753 | 0           |
| RP11-519G16.5 | FABP4     | -0.506382175 | 5.74E-30    |
| RP11-519G16.5 | LMOD1     | -0.476795162 | 0           |
| RP11-519G16.5 | SOD3      | -0.415164942 | 0           |
| RP11-519G16.5 | TMEM171   | -0.29910827  | 1.96E-10    |
| RP11-519G16.5 | PI16      | -0.167505113 | 0.000431552 |
| RP11-519G16.5 | ZMAT4     | -0.391540203 | 1.56E-17    |
| RP11-519G16.5 | MFAP4     | -0.197775568 | 3.11E-05    |
| RP11-519G16.5 | CWH43     | -0.240066941 | 3.58E-07    |
| RP11-519G16.5 | SPX       | -0.54920089  | 0           |
| RP11-519G16.5 | APOD      | -0.08425083  | 0.077846142 |
| RP11-519G16.5 | DPP6      | -0.319893934 | 8.72E-12    |
| RP11-519G16.5 | MMRN1     | -0.325805989 | 3.43E-12    |
| RP11-519G16.5 | WDR72     | -0.39872687  | 0           |
| RP11-519G16.5 | MPPED2    | -0.541835429 | 0           |
| RP11-519G16.5 | PAPSS2    | -0.262225226 | 2.77E-08    |
| RP11-519G16.5 | DCN       | 0.041718414  | 0.383071071 |
| RP11-519G16.5 | SORBS2    | -0.455644692 | 0           |
| RP11-519G16.5 | EGR2      | -0.327035434 | 2.82E-12    |
| RP11-519G16.5 | EDN3      | -0.513817411 | 6.02E-31    |
| RP11-519G16.5 | DIO2      | -0.414469515 | 0           |
| RP11-519G16.5 | ITPR1     | -0.498700063 | 0           |
| RP11-519G16.5 | CFD       | -0.147691743 | 0.001936074 |
| RP11-519G16.5 | CPXM1     | -0.239690001 | 4.06E-07    |
| RP11-519G16.5 | ELMO1     | -0.446971777 | 0           |
| RP11-519G16.5 | GPC3      | -0.367654906 | 1.70E-15    |
| RP11-519G16.5 | MYOC      | -0.293740757 | 3.47E-10    |
| RP11-519G16.5 | DEPTOR    | -0.472560472 | 0           |
| RP11-519G16.5 | DGKI      | -0.416017384 | 0           |
| RP11-519G16.5 | CARTPT    | -0.304966413 | 6.68E-11    |
| RP11-519G16.5 | IYD       | -0.225446858 | 1.95E-06    |
| RP11-519G16.5 | LYVE1     | -0.214661137 | 5.98E-06    |
| RP11-519G16.5 | CLCNKB    | -0.497836842 | 0           |

|               |            |              |             |
|---------------|------------|--------------|-------------|
| RP11-519G16.5 | NCAM1      | -0.236406329 | 5.87E-07    |
| RP11-519G16.5 | HBA2       | -0.284537767 | 1.51E-09    |
| RP11-519G16.5 | GLT8D2     | -0.294587495 | 3.74E-10    |
| RP11-519G16.5 | OGDHL      | -0.328501746 | 2.22E-12    |
| RP11-519G16.5 | LIFR       | -0.562023108 | 0           |
| RP11-519G16.5 | CSGALNACT1 | -0.327334001 | 2.68E-12    |
| RP11-519G16.5 | RAP1GAP    | -0.403938108 | 0           |
| RP11-519G16.5 | COL9A3     | -0.360891957 | 7.43E-15    |
| RP11-519G16.5 | FBLN1      | 0.005837874  | 0.902884821 |
| RP11-519G16.5 | EFEMP1     | -0.291572605 | 5.72E-10    |
| RP11-519G16.5 | AOX1       | -0.294942524 | 2.92E-10    |
| RP11-519G16.5 | GRIN2C     | -0.347833154 | 8.48E-14    |
| RP11-519G16.5 | C11orf74   | -0.432421699 | 0           |
| RP11-519G16.5 | PPARGC1A   | -0.386111166 | 0           |
| RP11-519G16.5 | ANGPTL1    | -0.548756088 | 0           |
| RP11-519G16.5 | SCARA5     | -0.116300292 | 0.014764982 |
| RP11-519G16.5 | LTF        | -0.289860347 | 7.26E-10    |
| RP11-519G16.5 | CA4        | -0.647223697 | 1.81E-53    |
| RP11-519G16.5 | TG         | -0.582052355 | 0           |
| RP11-519G16.5 | FCGBP      | -0.462238559 | 0           |
| RP11-519G16.5 | PBX4       | -0.452544558 | 0           |
| RP11-519G16.5 | CYR61      | -0.347153187 | 9.57E-14    |
| RP11-519G16.5 | FOS        | -0.342540785 | 2.14E-13    |
| RP11-519G16.5 | KHDRBS2    | -0.401193559 | 0           |
| RP11-519G16.5 | MUM1L1     | -0.290201891 | 6.93E-10    |
| RP11-519G16.5 | RGS16      | -0.274123659 | 6.06E-09    |
| RP11-519G16.5 | MT1M       | -0.250940664 | 1.10E-07    |
| RP11-519G16.5 | LRP2       | -0.449584559 | 0           |
| RP11-519G16.5 | MAFB       | -0.249980568 | 1.23E-07    |
| RP11-519G16.5 | KCNK2      | -0.398048747 | 0           |
| RP11-519G16.5 | TBC1D4     | -0.442343773 | 0           |
| RP11-519G16.5 | MIOX       | -0.412149074 | 1.97E-19    |
| RP11-519G16.5 | TPPP       | -0.407704593 | 0           |
| RP11-519G16.5 | FMOD       | -0.295879206 | 3.12E-10    |
| RP11-519G16.5 | CITED2     | -0.418942065 | 0           |
| RP11-519G16.5 | RGS8       | -0.405943759 | 7.59E-19    |
| RP11-519G16.5 | ABI3BP     | -0.198314124 | 2.96E-05    |
| RP11-519G16.5 | ADH1B      | -0.214238604 | 5.94E-06    |
| RP11-519G16.5 | OGN        | -0.076175218 | 0.110977699 |
| RP11-519G16.5 | NR4A1      | -0.319096242 | 9.87E-12    |
| RP11-519G16.5 | FOXJ1      | -0.490140162 | 6.55E-28    |
| RP11-519G16.5 | ALDH1A1    | -0.454723035 | 0           |
| RP11-519G16.5 | OCA2       | -0.372519243 | 6.73E-16    |
| RP11-519G16.5 | TMEM139    | -0.285945784 | 1.25E-09    |
| RP11-519G16.5 | ARHGAP24   | -0.366293682 | 2.46E-15    |
| RP11-519G16.5 | SLC25A15   | -0.411623978 | 0           |
| RP11-519G16.5 | DES        | -0.160117887 | 0.000759836 |
| RP11-519G16.5 | GDF10      | -0.306326986 | 5.44E-11    |
| RP11-519G16.5 | KIAA1324   | -0.325251832 | 3.75E-12    |
| RP11-519G16.5 | JUN        | -0.342874386 | 2.02E-13    |
| RP11-519G16.5 | C7         | 0.055325701  | 0.247254095 |

|               |          |              |             |
|---------------|----------|--------------|-------------|
| RP11-519G16.5 | LGI3     | -0.460391556 | 0           |
| RP11-519G16.5 | CDON     | -0.571785332 | 0           |
| RP11-519G16.5 | BCL2     | -0.457575379 | 0           |
| RP11-519G16.5 | HLF      | -0.564224704 | 0           |
| RP11-519G16.5 | EGR1     | -0.410015829 | 0           |
| RP11-519G16.5 | IP6K3    | -0.264525682 | 2.08E-08    |
| RP11-519G16.5 | SCUBE3   | -0.316782737 | 1.41E-11    |
| RP11-519G16.5 | PKNOX2   | -0.44512449  | 0           |
| RP11-519G16.5 | SMAD9    | -0.371746611 | 7.20E-16    |
| RP11-519G16.5 | IQGAP2   | -0.416370842 | 0           |
| RP11-519G16.5 | GNA14    | -0.489694965 | 0           |
| RP11-519G16.5 | LAYN     | -0.434084881 | 0           |
| RP11-519G16.5 | AVPR1A   | -0.497590754 | 0           |
| RP11-519G16.5 | PDLIM3   | -0.199046287 | 2.76E-05    |
| RP11-519G16.5 | GPM6A    | -0.429112355 | 0           |
| RP11-519G16.5 | SDPR     | -0.548211859 | 0           |
| RP11-519G16.5 | CRYAB    | -0.16886292  | 0.000386923 |
| RP11-519G16.5 | FOXA2    | -0.375247613 | 3.98E-16    |
| RP11-519G16.5 | C8orf88  | -0.394387505 | 0           |
| RP11-519G16.5 | ISM1     | -0.318083525 | 1.15E-11    |
| RP11-519G16.5 | BMP2     | -0.218758386 | 3.93E-06    |
| RP11-519G16.5 | ID4      | -0.494597849 | 0           |
| RP11-519G16.5 | NUPR1    | -0.154568148 | 0.001172433 |
| RP11-519G16.5 | SERTM1   | -0.2873176   | 8.65E-10    |
| RP11-519G16.5 | IRS1     | -0.492518659 | 0           |
| RP11-519G16.5 | FIBIN    | -0.068971142 | 0.149053597 |
| RP11-519G16.5 | PODN     | -0.034055237 | 0.476495317 |
| RP11-519G16.5 | TDRD9    | -0.242099388 | 3.08E-07    |
| RP11-519G16.5 | EPHA3    | -0.232612186 | 8.95E-07    |
| RP11-519G16.5 | AIF1L    | -0.415108775 | 0           |
| RP11-519G16.5 | EBF4     | -0.437550955 | 0           |
| RP11-519G16.5 | ADM2     | -0.312773285 | 2.61E-11    |
| RP11-519G16.5 | GSTM3    | -0.509125943 | 0           |
| RP11-519G16.5 | HSD17B6  | -0.271666473 | 8.35E-09    |
| RP11-519G16.5 | AGR3     | -0.335674205 | 5.06E-13    |
| RP11-519G16.5 | EPHB1    | -0.395090733 | 0           |
| RP11-519G16.5 | TMOD1    | -0.301896221 | 1.31E-10    |
| RP11-519G16.5 | WASF3    | -0.50107853  | 0           |
| RP11-519G16.5 | SELV     | -0.350534526 | 3.88E-14    |
| RP11-519G16.5 | ENPP1    | -0.119407291 | 0.01232991  |
| RP11-519G16.5 | SYNE1    | -0.512233329 | 9.78E-31    |
| RP11-519G16.5 | PLCH1    | -0.450217578 | 0           |
| RP11-519G16.5 | CCDC146  | -0.517470079 | 0           |
| RP11-519G16.5 | SLC16A2  | -0.455422717 | 0           |
| RP11-519G16.5 | IER2     | -0.421969011 | 0           |
| RP11-519G16.5 | KCNAB1   | -0.487087999 | 0           |
| RP11-519G16.5 | SYNDIG1  | -0.368851006 | 1.41E-15    |
| RP11-519G16.5 | C16orf89 | -0.440224301 | 0           |
| RP11-519G16.5 | CTGF     | -0.286516111 | 1.15E-09    |
| RP11-519G16.5 | NR4A3    | -0.137424436 | 0.00394238  |
| RP11-519G16.5 | KIAA1456 | -0.355360025 | 2.15E-14    |



|               |          |              |             |
|---------------|----------|--------------|-------------|
| RP11-519G16.5 | AQP4     | -0.362759243 | 5.12E-15    |
| RP11-519G16.5 | RNF150   | -0.49949974  | 0           |
| RP11-519G16.5 | C1S      | 0.13461365   | 0.004752358 |
| RP11-519G16.5 | PFKFB2   | -0.33336449  | 1.01E-12    |
| RP11-519G16.5 | PROX1    | -0.394238008 | 0           |
| RP11-519G16.5 | TCF7L1   | -0.549111958 | 0           |
| RP11-519G16.5 | HSPB6    | -0.267910058 | 1.35E-08    |
| RP11-519G16.5 | FHDC1    | -0.240747113 | 3.60E-07    |
| RP11-519G16.5 | PRR15L   | -0.304932954 | 8.41E-11    |
| RP11-519G16.5 | SLC1A1   | -0.19223002  | 5.20E-05    |
| RP11-519G16.5 | BTBD11   | -0.625841591 | 0           |
| RP11-519G16.5 | TRIM58   | -0.372278216 | 6.32E-16    |
| RP11-519G16.5 | LRIG1    | -0.355734192 | 2.01E-14    |
| RP11-519G16.5 | ROR2     | -0.201845868 | 2.12E-05    |
| RP11-519G16.5 | GPR125   | -0.487712224 | 0           |
| RP11-519G16.5 | FLRT1    | -0.540733922 | 0           |
| RP11-519G16.5 | PGF      | -0.453376291 | 0           |
| RP11-519G16.5 | DUSP1    | -0.301662899 | 1.36E-10    |
| RP11-519G16.5 | PLA2G7   | -0.292782901 | 4.83E-10    |
| RP11-519G16.5 | PLSCR4   | -0.289736523 | 7.39E-10    |
| RP11-519G16.5 | FAM46B   | -0.150943217 | 0.00153118  |
| RP11-519G16.5 | GLDC     | -0.363662036 | 4.26E-15    |
| RP11-519G16.5 | ZBTB16   | -0.394486082 | 0           |
| RP11-519G16.5 | OMD      | 0.006402849  | 0.893581706 |
| RP11-519G16.5 | HSD11B2  | -0.535655302 | 0           |
| RP11-519G16.5 | FGL2     | -0.023177322 | 0.628043932 |
| RP11-519G16.5 | CLCNKA   | -0.450029447 | 2.81E-23    |
| RP11-519G16.5 | GATM     | -0.346062459 | 1.16E-13    |
| RP11-519G16.5 | TNS3     | -0.397980239 | 0           |
| RP11-519G16.5 | TOB1     | -0.398632406 | 0           |
| RP11-519G16.5 | MARC2    | -0.526065977 | 0           |
| RP11-519G16.5 | LRRC2    | -0.363363895 | 4.53E-15    |
| RP11-519G16.5 | SORD     | -0.305019332 | 8.30E-11    |
| RP11-519G16.5 | RIMS4    | -0.526676586 | 0           |
| RP11-519G16.5 | SLC29A4  | -0.430842484 | 0           |
| RP11-519G16.5 | SLC39A14 | -0.42875762  | 0           |
| RP11-519G16.5 | FAXDC2   | -0.478757762 | 0           |
| RP11-519G16.5 | HSPB8    | -0.101332844 | 0.033827187 |
| RP11-519G16.5 | CCL19    | 0.230128043  | 1.10E-06    |
| RP11-519G16.5 | KCNIP3   | -0.59103022  | 0           |
| RP11-519G16.5 | CGNL1    | -0.41532692  | 0           |
| RP11-519G16.5 | ATF3     | -0.121461234 | 0.010901261 |
| RP11-519G16.5 | SGCD     | -0.209665917 | 9.88E-06    |
| RP11-519G16.5 | STARD13  | -0.512138989 | 0           |
| RP11-519G16.5 | LDHD     | -0.379939407 | 5.99E-17    |
| RP11-519G16.5 | RCAN1    | -0.351289158 | 4.56E-14    |
| RP11-519G16.5 | ID3      | -0.296604845 | 2.81E-10    |
| RP11-519G16.5 | SYTL3    | -0.475988108 | 0           |
| RP11-519G16.5 | MT1E     | -0.098303202 | 0.039547909 |
| RP11-519G16.5 | CAMK1D   | -0.455042736 | 0           |
| RP11-519G16.5 | PRKCQ    | -0.463275955 | 0           |

|               |          |              |             |
|---------------|----------|--------------|-------------|
| RP11-519G16.5 | NUAK2    | -0.183003373 | 0.000118229 |
| RP11-519G16.5 | LIPG     | -0.516703308 | 0           |
| RP11-519G16.5 | SLC25A25 | -0.238856282 | 4.46E-07    |
| RP11-519G16.5 | PRKX     | -0.244606501 | 2.31E-07    |
| RP11-519G16.5 | SRPX     | -0.178979737 | 0.000167183 |
| RP11-519G16.5 | FAM189A1 | -0.59036855  | 0           |
| RP11-519G16.5 | PLEKHH1  | -0.388774726 | 0           |
| RP11-519G16.5 | WNT11    | -0.330978364 | 1.49E-12    |
| RP11-519G16.5 | SNAI1    | -0.285639416 | 1.30E-09    |
| RP11-519G16.5 | FDCSP    | 0.107449508  | 0.024358943 |
| RP11-519G16.5 | MT1X     | -0.123922676 | 0.009383888 |
| RP11-519G16.5 | ACACB    | -0.570063146 | 0           |
| RP11-519G16.5 | ARC      | -0.276627085 | 4.36E-09    |
| RP11-519G16.5 | KLK4     | -0.049229357 | 0.303407855 |
| RP11-519G16.5 | ZFPM2    | -0.365909304 | 2.67E-15    |
| RP11-519G16.5 | AKAP12   | -0.335662677 | 6.87E-13    |
| RP11-519G16.5 | GJB6     | -0.268083705 | 1.16E-08    |
| RP11-519G16.5 | ERO1LB   | -0.485117739 | 0           |
| RP11-519G16.5 | DNALI1   | -0.440460035 | 0           |
| RP11-519G16.5 | HKDC1    | -0.206447632 | 1.36E-05    |
| RP11-519G16.5 | ZFP36L2  | -0.31917638  | 9.75E-12    |
| RP11-519G16.5 | CAPSL    | -0.476702424 | 2.74E-26    |
| RP11-519G16.5 | CYP7B1   | -0.36541798  | 2.96E-15    |
| RP11-519G16.5 | CPQ      | -0.460859476 | 0           |
| RP11-519G16.5 | RPS6KA6  | -0.583361816 | 2.18E-41    |
| RP11-519G16.5 | TLE1     | -0.284313948 | 1.56E-09    |
| RP11-519G16.5 | TP53INP2 | -0.543220611 | 0           |
| RP11-519G16.5 | KATNAL2  | -0.596494779 | 0           |
| RP11-519G16.5 | SGPP2    | -0.006317284 | 0.894953939 |
| RP11-519G16.5 | CTH      | -0.299239186 | 1.93E-10    |
| RP11-519G16.5 | KIF12    | -0.310092988 | 3.90E-11    |
| RP11-519G16.5 | TMEM220  | -0.408913329 | 0           |
| RP11-519G16.5 | CENPJ    | -0.276578718 | 4.39E-09    |
| RP11-519G16.5 | FAM155B  | -0.512288769 | 0           |
| RP11-519G16.5 | WFS1     | -0.476833883 | 0           |
| RP11-519G16.5 | SELENBP1 | -0.464002445 | 0           |
| RP11-519G16.5 | SNTA1    | -0.284027721 | 1.62E-09    |
| RP11-519G16.5 | FRAS1    | -0.120704817 | 0.011409364 |
| RP11-519G16.5 | FBLN7    | -0.272514375 | 7.48E-09    |
| RP11-519G16.5 | AGPAT9   | -0.514141729 | 0           |
| RP11-519G16.5 | GPR83    | -0.377144223 | 1.67E-16    |
| RP11-519G16.5 | PRTG     | -0.43502824  | 0           |
| RP11-519G16.5 | EGR3     | -0.229884658 | 1.21E-06    |
| RP11-519G16.5 | GRAMD2   | -0.347363106 | 9.22E-14    |
| RP11-519G16.5 | HYOU1    | -0.520216046 | 0           |
| RP11-519G16.5 | FBLN5    | -0.273802682 | 6.32E-09    |
| RP11-519G16.5 | ITM2A    | -0.540460744 | 0           |
| RP11-519G16.5 | SRF      | -0.362309194 | 5.60E-15    |
| RP11-519G16.5 | FGFR2    | -0.454862886 | 0           |
| RP11-519G16.5 | MT1A     | -0.119812595 | 0.011996374 |
| RP11-519G16.5 | MAMDC2   | -0.258906095 | 4.18E-08    |

|               |          |              |             |
|---------------|----------|--------------|-------------|
| RP11-519G16.5 | FHL2     | -0.248576948 | 1.45E-07    |
| RP11-519G16.5 | FTCDNL1  | -0.318993694 | 1.00E-11    |
| RP11-519G16.5 | PKIA     | -0.517381573 | 0           |
| RP11-519G16.5 | DNAJB4   | -0.44510208  | 0           |
| RP11-519G16.5 | SLC25A33 | -0.478770102 | 0           |
| RP11-519G16.5 | EYA2     | -0.181781162 | 0.000131451 |
| RP11-519G16.5 | LPAR1    | -0.113421622 | 0.017479012 |
| RP11-519G16.5 | STX11    | -0.044152622 | 0.355911806 |
| RP11-519G16.5 | ARHGEF28 | -0.267006272 | 1.52E-08    |
| RP11-519G16.5 | OR2W3    | -0.393553786 | 0           |
| RP11-519G16.5 | ALDH1B1  | -0.328170993 | 1.76E-12    |
| RP11-519G16.5 | CXCL12   | -0.135216174 | 0.004567051 |
| RP11-519G16.5 | OLFM2    | -0.336621638 | 5.85E-13    |
| RP11-519G16.5 | TUB      | -0.487689814 | 0           |
| RP11-519G16.5 | HTRA3    | -0.090367982 | 0.058526037 |
| RP11-519G16.5 | CKB      | -0.205099896 | 1.55E-05    |
| RP11-519G16.5 | RGS2     | 0.024569737  | 0.607535551 |
| RP11-519G16.5 | SHANK2   | -0.520709498 | 0           |
| RP11-519G16.5 | CNTFR    | -0.398669854 | 3.55E-18    |
| RP11-519G16.5 | CYTH3    | -0.423539432 | 0           |
| RP11-519G16.5 | PLAC9    | -0.280567036 | 2.58E-09    |
| RP11-519G16.5 | WVOX     | -0.584732084 | 0           |
| RP11-519G16.5 | NPR3     | -0.460103343 | 0           |
| RP11-519G16.5 | SDC2     | -0.430618382 | 0           |
| RP11-519G16.5 | KLF15    | -0.419841738 | 0           |
| RP11-519G16.5 | TMEM164  | -0.439156977 | 0           |
| RP11-519G16.5 | LONRF3   | -0.2397795   | 4.01E-07    |
| RP11-519G16.5 | GBP1     | 0.059938953  | 0.209969208 |
| RP11-519G16.5 | ARHGAP6  | -0.236535968 | 5.79E-07    |
| RP11-519G16.5 | TMEM119  | -0.037306711 | 0.435414581 |
| RP11-519G16.5 | SH3RF1   | -0.389242363 | 0           |
| RP11-519G16.5 | CRELD2   | -0.411401294 | 0           |
| RP11-519G16.5 | PCP4     | -0.004113135 | 0.931491635 |
| RP11-519G16.5 | GCSH     | -0.541619837 | 0           |
| RP11-519G16.5 | IMPA2    | -0.4612674   | 0           |
| RP11-519G16.5 | C1R      | 0.17949106   | 0.000160046 |
| RP11-519G16.5 | SUCNR1   | -0.260363472 | 3.49E-08    |
| RP11-519G16.5 | SFRP1    | -0.262058142 | 2.83E-08    |
| RP11-519G16.5 | UGT8     | -0.319337649 | 9.51E-12    |
| RP11-519G16.5 | TLE4     | -0.2642908   | 2.14E-08    |
| RP11-519G16.5 | ANTXR1   | -0.29211882  | 5.30E-10    |
| RP11-519G16.5 | GPX3     | -0.288771747 | 8.45E-10    |
| RP11-519G16.5 | DPY19L2  | -0.434633507 | 0           |
| RP11-519G16.5 | FAM46C   | -0.321515842 | 6.76E-12    |
| RP11-519G16.5 | IL33     | -0.164351867 | 0.00054567  |
| RP11-519G16.5 | PEG3     | -0.566138654 | 0           |
| RP11-519G16.5 | FAHD2A   | -0.435782246 | 0           |
| RP11-519G16.5 | PTGDS    | -0.049629947 | 0.299358791 |
| RP11-519G16.5 | CHCHD10  | -0.193427977 | 4.66E-05    |
| RP11-519G16.5 | CD36     | -0.575696491 | 0           |
| RP11-519G16.5 | ANKRD37  | -0.360428717 | 8.14E-15    |

|               |          |              |             |
|---------------|----------|--------------|-------------|
| RP11-519G16.5 | TSPAN33  | -0.355850924 | 1.96E-14    |
| RP11-519G16.5 | PRDM16   | -0.512583223 | 0           |
| RP11-519G16.5 | UST      | -0.56323383  | 0           |
| RP11-519G16.5 | NEXN     | -0.381350828 | 2.88E-17    |
| RP11-519G16.5 | NUPR1L   | -0.169976969 | 0.000347129 |
| RP11-519G16.5 | SLC24A3  | -0.287208986 | 1.05E-09    |
| RP11-519G16.5 | MARC1    | -0.603531319 | 0           |
| RP11-519G16.5 | MYH11    | -0.262358553 | 2.72E-08    |
| RP11-519G16.5 | APOA1    | -0.424007722 | 1.39E-20    |
| RP11-519G16.5 | TMEM178B | -0.437337916 | 0           |
| RP11-519G16.5 | CAPN6    | -0.260081684 | 3.22E-08    |
| RP11-519G16.5 | PPM1L    | -0.539092583 | 0           |
| RP11-519G16.5 | FZD8     | -0.440006723 | 0           |
| RP11-519G16.5 | RCAN2    | -0.511366686 | 0           |
| RP11-519G16.5 | COPZ2    | -0.282300286 | 2.05E-09    |
| RP11-519G16.5 | GAS1     | -0.069483599 | 0.146050931 |
| RP11-519G16.5 | DACT1    | -0.227805751 | 1.51E-06    |
| RP11-519G16.5 | WBCSR17  | -0.484105589 | 0           |
| RP11-519G16.5 | NCS1     | -0.429374328 | 0           |
| RP11-519G16.5 | SPIRE2   | -0.251719633 | 9.99E-08    |
| RP11-519G16.5 | C15orf52 | -0.183573416 | 0.0001125   |
| RP11-519G16.5 | SPAG5    | -0.20423554  | 1.68E-05    |
| RP11-519G16.5 | ARL4D    | -0.297946624 | 2.32E-10    |
| RP11-519G16.5 | FAM189A2 | -0.384076796 | 0           |
| RP11-519G16.5 | MAP1LC3A | -0.415833563 | 0           |
| RP11-519G16.5 | KLF6     | -0.025470119 | 0.594434969 |
| RP11-519G16.5 | ADD3     | -0.435862951 | 0           |
| RP11-519G16.5 | TSPAN7   | -0.553953426 | 0           |
| RP11-519G16.5 | KLF9     | -0.385390917 | 0           |
| RP11-519G16.5 | KCNQ1    | -0.531808962 | 0           |
| RP11-519G16.5 | MAN1A1   | -0.047709188 | 0.318468982 |
| RP11-519G16.5 | MLF1     | -0.308563984 | 4.91E-11    |
| RP11-519G16.5 | RARB     | -0.533365199 | 0           |
| RP11-519G16.5 | CDC42EP2 | -0.134840589 | 0.00468178  |
| RP11-519G16.5 | FAM3B    | -0.110768842 | 0.020307035 |
| RP11-519G16.5 | GADD45B  | -0.064763685 | 0.175507808 |
| RP11-519G16.5 | TMEM47   | -0.542102367 | 0           |
| RP11-519G16.5 | SDF2L1   | -0.359918954 | 9.00E-15    |
| RP11-519G16.5 | CCDC85A  | -0.339000389 | 3.92E-13    |
| RP11-519G16.5 | CRYBG3   | -0.163975213 | 0.000570991 |
| RP11-519G16.5 | FBLN2    | 0.021821217  | 0.648296879 |
| RP11-519G16.5 | PEBP4    | -0.106235869 | 0.026065164 |
| RP11-519G16.5 | CDADC1   | -0.618075298 | 0           |
| RP11-519G16.5 | FAM63A   | -0.429076612 | 0           |
| RP11-519G16.5 | GLUL     | -0.245205338 | 2.15E-07    |
| RP11-519G16.5 | FREM2    | -0.206615142 | 1.33E-05    |
| RP11-519G16.5 | ACKR3    | -0.432596584 | 0           |
| RP11-519G16.5 | DENND6A  | -0.561325979 | 0           |
| RP11-519G16.5 | CLDN8    | 0.008000749  | 0.867192343 |
| RP11-519G16.5 | UTS2R    | -0.223938879 | 2.15E-06    |
| RP11-519G16.5 | SCNN1B   | -0.253002976 | 8.57E-08    |

|               |          |              |             |
|---------------|----------|--------------|-------------|
| RP11-519G16.5 | TTC30A   | -0.439876233 | 0           |
| RP11-519G16.5 | CORO2B   | -0.505165425 | 0           |
| RP11-519G16.5 | TC2N     | -0.148969128 | 0.001766554 |
| RP11-519G16.5 | ALDH2    | -0.290239052 | 6.89E-10    |
| RP11-519G16.5 | GPR183   | 0.113889117  | 0.01701805  |
| RP11-519G16.5 | C4orf47  | -0.41018958  | 0           |
| RP11-519G16.5 | SLC25A42 | -0.604830689 | 0           |
| RP11-519G16.5 | LGMN     | -0.369339351 | 1.26E-15    |
| RP11-519G16.5 | ACSF2    | -0.350414448 | 5.34E-14    |
| RP11-519G16.5 | KIAA1467 | -0.548830127 | 0           |
| RP11-519G16.5 | PRKG1    | -0.536493559 | 0           |
| RP11-519G16.5 | GNAI1    | -0.434001623 | 0           |
| RP11-519G16.5 | ABCC4    | -0.305369954 | 7.88E-11    |
| RP11-519G16.5 | PRPS1    | -0.488731607 | 0           |
| RP11-519G16.5 | TSPAN5   | -0.161210523 | 0.000708277 |
| RP11-519G16.5 | CR2      | -0.006571883 | 0.890789619 |
| RP11-519G16.5 | CCDC170  | -0.38022067  | 5.27E-17    |
| RP11-519G16.5 | RRAD     | 0.031506424  | 0.51012389  |
| RP11-519G16.5 | SCGB2A1  | -0.15323105  | 0.001294616 |
| RP11-519G16.5 | SESN3    | -0.348153422 | 8.01E-14    |
| RP11-519G16.5 | SGK223   | -0.19844972  | 2.92E-05    |
| RP11-519G16.5 | NDRG2    | -0.525053544 | 0           |
| RP11-519G16.5 | C3orf52  | -0.167595322 | 0.000428445 |
| RP11-519G16.5 | FLRT3    | 0.187771086  | 7.77E-05    |
| RP11-519G16.5 | MST1R    | 0.470502699  | 0           |
| RP11-519G16.5 | SDC1     | 0.370440858  | 9.80E-16    |
| RP11-519G16.5 | ST8SIA4  | 0.496439604  | 0           |
| RP11-519G16.5 | UBTD1    | 0.297347078  | 2.53E-10    |
| RP11-519G16.5 | EPHA2    | 0.168536553  | 0.00039724  |
| RP11-519G16.5 | TMEM130  | 0.07739953   | 0.105321235 |
| RP11-519G16.5 | SPINK2   | 0.481078501  | 0           |
| RP11-519G16.5 | MMP16    | 0.480407186  | 0           |
| RP11-519G16.5 | SIGLEC15 | 0.275154815  | 5.30E-09    |
| RP11-519G16.5 | RIN1     | 0.398756656  | 0           |
| RP11-519G16.5 | IL1RN    | 0.590516486  | 0           |
| RP11-519G16.5 | FCER1G   | 0.420776019  | 0           |
| RP11-519G16.5 | CD276    | 0.517203709  | 0           |
| RP11-519G16.5 | CTSB     | 0.507183342  | 0           |
| RP11-519G16.5 | FAM171A2 | -0.051946998 | 0.277341938 |
| RP11-519G16.5 | ASPHD1   | 0.547406083  | 0           |
| RP11-519G16.5 | C15orf48 | 0.842166619  | 0           |
| RP11-519G16.5 | DYSF     | 0.008662845  | 0.856316557 |
| RP11-519G16.5 | PDZRN4   | -0.112751442 | 0.01815886  |
| RP11-519G16.5 | EFHD2    | 0.242617519  | 2.90E-07    |
| RP11-519G16.5 | ASF1B    | 0.439674115  | 0           |
| RP11-519G16.5 | AQP1     | 0.066790821  | 0.162356112 |
| RP11-519G16.5 | ARRDC2   | 0.357507156  | 1.43E-14    |
| RP11-519G16.5 | PRSS1    | 0.341895076  | 1.76E-13    |
| RP11-519G16.5 | MAPK13   | 0.468099269  | 0           |
| RP11-519G16.5 | CST5     | 0.541758566  | 7.52E-35    |
| RP11-519G16.5 | AHR      | 0.393205009  | 0           |

|               |          |              |             |
|---------------|----------|--------------|-------------|
| RP11-519G16.5 | BAX      | 0.468125509  | 0           |
| RP11-519G16.5 | C1orf115 | 0.045172431  | 0.344902685 |
| RP11-519G16.5 | PLK3     | 0.279357875  | 3.04E-09    |
| RP11-519G16.5 | JAG2     | 0.167035632  | 0.000448067 |
| RP11-519G16.5 | RAD23B   | 0.37221595   | 6.42E-16    |
| RP11-519G16.5 | CA12     | -0.122403459 | 0.010296465 |
| RP11-519G16.5 | ADTRP    | 0.18179024   | 0.000131348 |
| RP11-519G16.5 | UCP2     | 0.222959035  | 2.53E-06    |
| RP11-519G16.5 | IGFBP2   | 0.105359458  | 0.027327789 |
| RP11-519G16.5 | LOXL2    | 0.290637189  | 6.52E-10    |
| RP11-519G16.5 | GPX1     | 0.366711251  | 2.25E-15    |
| RP11-519G16.5 | P3H3     | 0.369041209  | 1.35E-15    |
| RP11-519G16.5 | C2orf81  | 0.14636514   | 0.002127784 |
| RP11-519G16.5 | CDT1     | 0.445330722  | 0           |
| RP11-519G16.5 | SNX25    | 0.160286029  | 0.000760622 |
| RP11-519G16.5 | MTHFD1L  | 0.456145236  | 0           |
| RP11-519G16.5 | CDC42BPG | 0.418391185  | 4.95E-20    |
| RP11-519G16.5 | MSN      | 0.328343456  | 2.28E-12    |
| RP11-519G16.5 | SIGLEC6  | 0.299938277  | 1.41E-10    |
| RP11-519G16.5 | F2R      | 0.216441193  | 4.99E-06    |
| RP11-519G16.5 | TMEM184A | 0.478298919  | 0           |
| RP11-519G16.5 | CKS2     | 0.399265142  | 0           |
| RP11-519G16.5 | TAX1BP3  | 0.511010249  | 0           |
| RP11-519G16.5 | PMEPA1   | 0.473042435  | 0           |
| RP11-519G16.5 | CXCL16   | 0.598835375  | 0           |
| RP11-519G16.5 | FAXC     | 0.443022748  | 0           |
| RP11-519G16.5 | VTCN1    | 0.564303522  | 2.81E-38    |
| RP11-519G16.5 | SH2D4A   | 0.353478556  | 3.05E-14    |
| RP11-519G16.5 | RNF24    | 0.20710065   | 1.27E-05    |
| RP11-519G16.5 | LY6G6C   | 0.374367681  | 4.72E-16    |
| RP11-519G16.5 | NID1     | 0.322740889  | 5.58E-12    |
| RP11-519G16.5 | STAC     | 0.64039791   | 0           |
| RP11-519G16.5 | RAB34    | 0.309049776  | 4.57E-11    |
| RP11-519G16.5 | HES4     | 0.338215887  | 4.48E-13    |
| RP11-519G16.5 | EPHA10   | 0.495023502  | 0           |
| RP11-519G16.5 | ENTPD2   | 0.234462735  | 7.29E-07    |
| RP11-519G16.5 | DDB2     | 0.475725     | 0           |
| RP11-519G16.5 | NKAIN4   | 0.242777795  | 2.85E-07    |
| RP11-519G16.5 | TRIM29   | 0.301402486  | 1.41E-10    |
| RP11-519G16.5 | ADCY8    | 0.48659864   | 1.78E-27    |
| RP11-519G16.5 | SFTA2    | 0.536334276  | 0           |
| RP11-519G16.5 | NRIP1    | 0.273105269  | 6.92E-09    |
| RP11-519G16.5 | VWA1     | 0.037158775  | 0.437238281 |
| RP11-519G16.5 | APLNR    | 0.17986551   | 0.000155003 |
| RP11-519G16.5 | REN      | 0.362893111  | 4.13E-15    |
| RP11-519G16.5 | EDIL3    | 0.229974725  | 1.19E-06    |
| RP11-519G16.5 | AGRN     | 0.204103065  | 1.70E-05    |
| RP11-519G16.5 | TREM1    | 0.492372425  | 0           |
| RP11-519G16.5 | SRL      | 0.223058746  | 2.51E-06    |
| RP11-519G16.5 | RASGRF1  | 0.290290256  | 6.84E-10    |
| RP11-519G16.5 | RMI2     | 0.433378958  | 0           |

|               |          |              |             |
|---------------|----------|--------------|-------------|
| RP11-519G16.5 | SAMD1    | 0.384472238  | 0           |
| RP11-519G16.5 | MGAT4B   | 0.439339805  | 0           |
| RP11-519G16.5 | NXN      | 0.50055742   | 0           |
| RP11-519G16.5 | SH3BGRL3 | 0.567968779  | 0           |
| RP11-519G16.5 | CA11     | 0.154123915  | 0.001211796 |
| RP11-519G16.5 | PLD3     | 0.1446126    | 0.002407664 |
| RP11-519G16.5 | LURAP1L  | 0.553656987  | 0           |
| RP11-519G16.5 | CARNS1   | 0.089984029  | 0.059609024 |
| RP11-519G16.5 | PDLIM7   | 0.354798917  | 2.39E-14    |
| RP11-519G16.5 | BCL2L1   | 0.576844379  | 0           |
| RP11-519G16.5 | GGT6     | 0.21987124   | 3.50E-06    |
| RP11-519G16.5 | DPYSL3   | 0.483410304  | 0           |
| RP11-519G16.5 | FYN      | 0.266412967  | 1.64E-08    |
| RP11-519G16.5 | TK1      | 0.464577879  | 0           |
| RP11-519G16.5 | AK1      | 0.305058479  | 8.25E-11    |
| RP11-519G16.5 | HIGD1B   | -0.036527884 | 0.445064727 |
| RP11-519G16.5 | TMEM59L  | 0.269477784  | 1.11E-08    |
| RP11-519G16.5 | MEGF9    | 0.269743729  | 1.07E-08    |
| RP11-519G16.5 | ZFP36L1  | 0.387648397  | 0           |
| RP11-519G16.5 | ADRA1B   | 0.154971675  | 0.001137703 |
| RP11-519G16.5 | EPHA4    | 0.419970668  | 0           |
| RP11-519G16.5 | TCERG1L  | 0.103782229  | 0.029732914 |
| RP11-519G16.5 | NGFR     | 0.058195066  | 0.223555453 |
| RP11-519G16.5 | EBI3     | 0.635833449  | 0           |
| RP11-519G16.5 | S100A10  | 0.525485863  | 0           |
| RP11-519G16.5 | S100B    | 0.563993651  | 0           |
| RP11-519G16.5 | CD44     | 0.119978327  | 0.01191699  |
| RP11-519G16.5 | BHLHE41  | 0.252267267  | 9.36E-08    |
| RP11-519G16.5 | FBX02    | 0.258708091  | 4.28E-08    |
| RP11-519G16.5 | SLC30A2  | 0.469079789  | 0           |
| RP11-519G16.5 | FRMD5    | 0.648540921  | 0           |
| RP11-519G16.5 | SAMD11   | 0.187322597  | 8.08E-05    |
| RP11-519G16.5 | SIPA1L2  | 0.111554195  | 0.019430988 |
| RP11-519G16.5 | S100A16  | 0.539315125  | 0           |
| RP11-519G16.5 | PPL      | 0.454989972  | 0           |
| RP11-519G16.5 | ARHGDIB  | 0.182655021  | 0.000121864 |
| RP11-519G16.5 | CDC42EP3 | 0.634853922  | 0           |
| RP11-519G16.5 | RUNX2    | 0.289579368  | 7.55E-10    |
| RP11-519G16.5 | LAMC2    | 0.572859181  | 0           |
| RP11-519G16.5 | BRINP1   | 0.275563022  | 5.02E-09    |
| RP11-519G16.5 | GPRC5B   | 0.386249599  | 0           |
| RP11-519G16.5 | AQP5     | 0.005719582  | 0.90484325  |
| RP11-519G16.5 | PLAG1    | 0.176228097  | 0.000210996 |
| RP11-519G16.5 | PTPRU    | 0.404284758  | 0           |
| RP11-519G16.5 | ANGPTL4  | 0.36248266   | 5.41E-15    |
| RP11-519G16.5 | PALM3    | 0.161399876  | 0.000697976 |
| RP11-519G16.5 | ACP5     | 0.440466417  | 0           |
| RP11-519G16.5 | DLG4     | 0.100344381  | 0.035610701 |
| RP11-519G16.5 | ETNK2    | 0.214014643  | 6.39E-06    |
| RP11-519G16.5 | CD109    | 0.326911752  | 2.87E-12    |
| RP11-519G16.5 | SNX22    | 0.232376736  | 9.19E-07    |

|               |          |              |             |
|---------------|----------|--------------|-------------|
| RP11-519G16.5 | TMEM98   | 0.311334063  | 3.24E-11    |
| RP11-519G16.5 | CTHRC1   | 0.466845712  | 0           |
| RP11-519G16.5 | S100A2   | 0.531888817  | 0           |
| RP11-519G16.5 | C11orf80 | 0.595541492  | 0           |
| RP11-519G16.5 | SREBF1   | 0.392678084  | 0           |
| RP11-519G16.5 | PRSS22   | 0.539971689  | 0           |
| RP11-519G16.5 | CMTM3    | 0.555208118  | 0           |
| RP11-519G16.5 | RDH5     | 0.234495783  | 7.27E-07    |
| RP11-519G16.5 | MYH10    | 0.244986199  | 2.21E-07    |
| RP11-519G16.5 | EVPL     | 0.334971363  | 7.71E-13    |
| RP11-519G16.5 | SCD      | 0.356040985  | 1.89E-14    |
| RP11-519G16.5 | CD151    | 0.272807127  | 7.20E-09    |
| RP11-519G16.5 | S100A4   | 0.315256995  | 1.78E-11    |
| RP11-519G16.5 | BNIP1    | 0.271268903  | 8.79E-09    |
| RP11-519G16.5 | MAP3K6   | 0.474973831  | 0           |
| RP11-519G16.5 | MANEAL   | 0.351278945  | 4.57E-14    |
| RP11-519G16.5 | CD207    | 0.482548418  | 5.50E-27    |
| RP11-519G16.5 | CD1A     | 0.540945609  | 9.88E-35    |
| RP11-519G16.5 | C3       | 0.414927365  | 0           |
| RP11-519G16.5 | NT5E     | 0.425013404  | 0           |
| RP11-519G16.5 | CACNG4   | 0.549270779  | 5.79E-36    |
| RP11-519G16.5 | FHOD1    | 0.447318853  | 0           |
| RP11-519G16.5 | LEMD1    | 0.376098883  | 2.29E-16    |
| RP11-519G16.5 | ATP11A   | 0.200552881  | 2.39E-05    |
| RP11-519G16.5 | PPAP2C   | 0.257905576  | 4.73E-08    |
| RP11-519G16.5 | DRAM1    | 0.539761912  | 0           |
| RP11-519G16.5 | CDA      | 0.170217748  | 0.00034671  |
| RP11-519G16.5 | CCND2    | 0.147646496  | 0.001942343 |
| RP11-519G16.5 | LCN6     | 0.0657174    | 0.169288731 |
| RP11-519G16.5 | CDH4     | 0.513079653  | 0           |
| RP11-519G16.5 | MMP11    | 0.605205423  | 0           |
| RP11-519G16.5 | B3GAT1   | 0.224865326  | 2.07E-06    |
| RP11-519G16.5 | SPP1     | 0.393177918  | 0           |
| RP11-519G16.5 | HLA-DQB1 | 0.454163771  | 0           |
| RP11-519G16.5 | SDC3     | 0.298804171  | 2.05E-10    |
| RP11-519G16.5 | CX3CL1   | 0.400208501  | 0           |
| RP11-519G16.5 | SDK1     | 0.305369954  | 7.88E-11    |
| RP11-519G16.5 | DOCK9    | 0.291597001  | 5.70E-10    |
| RP11-519G16.5 | CSF2     | 0.621433087  | 2.98E-48    |
| RP11-519G16.5 | GRHL3    | 0.560891248  | 0           |
| RP11-519G16.5 | TMEM92   | 0.598987594  | 4.29E-44    |
| RP11-519G16.5 | BASP1    | 0.499853766  | 0           |
| RP11-519G16.5 | HRH1     | 0.522264174  | 0           |
| RP11-519G16.5 | ESM1     | -0.009385788 | 0.844472335 |
| RP11-519G16.5 | B4GALNT3 | 0.346373083  | 1.10E-13    |
| RP11-519G16.5 | LMO3     | 0.342764037  | 2.06E-13    |
| RP11-519G16.5 | C9orf16  | 0.46406145   | 0           |
| RP11-519G16.5 | SEMA3F   | 0.01120797   | 0.81477988  |
| RP11-519G16.5 | PLA2G12B | 0.173878582  | 0.000251531 |
| RP11-519G16.5 | KLK6     | 0.335603791  | 5.12E-13    |
| RP11-519G16.5 | ST3GAL5  | 0.119818902  | 0.012031022 |



|               |          |             |             |
|---------------|----------|-------------|-------------|
| RP11-519G16.5 | FAM132B  | 0.166603738 | 0.000463778 |
| RP11-519G16.5 | CDKN1A   | 0.30484005  | 8.52E-11    |
| RP11-519G16.5 | E2F1     | 0.448097255 | 0           |
| RP11-519G16.5 | B3GNT8   | 0.402983828 | 0           |
| RP11-519G16.5 | MTMR11   | 0.534671661 | 0           |
| RP11-519G16.5 | MYO1G    | 0.485699839 | 0           |
| RP11-519G16.5 | TMSB10   | 0.543013528 | 0           |
| RP11-519G16.5 | UNC5CL   | 0.640228698 | 0           |
| RP11-519G16.5 | ABR      | 0.504908841 | 0           |
| RP11-519G16.5 | PLP2     | 0.527481653 | 0           |
| RP11-519G16.5 | SRCIN1   | 0.324789017 | 4.03E-12    |
| RP11-519G16.5 | PDE9A    | 0.498602762 | 0           |
| RP11-519G16.5 | TREM2    | 0.402161598 | 0           |
| RP11-519G16.5 | KDELR3   | 0.457149301 | 0           |
| RP11-519G16.5 | PC       | 0.220008539 | 3.45E-06    |
| RP11-519G16.5 | C2CD4A   | 0.706128215 | 0           |
| RP11-519G16.5 | PELI1    | 0.465467339 | 0           |
| RP11-519G16.5 | SSX1     | 0.120833322 | 0.011321593 |
| RP11-519G16.5 | MROH6    | 0.389630713 | 0           |
| RP11-519G16.5 | ESPN     | 0.312737258 | 2.62E-11    |
| RP11-519G16.5 | BMP1     | 0.313178797 | 2.45E-11    |
| RP11-519G16.5 | TM4SF4   | 0.259723829 | 3.36E-08    |
| RP11-519G16.5 | CORO2A   | 0.382976424 | 5.21E-18    |
| RP11-519G16.5 | CD164L2  | 0.447014061 | 5.94E-23    |
| RP11-519G16.5 | CTSS     | 0.51860662  | 0           |
| RP11-519G16.5 | CLU      | 0.316863017 | 1.39E-11    |
| RP11-519G16.5 | TMSB4X   | 0.491889895 | 0           |
| RP11-519G16.5 | WNT10A   | 0.378107807 | 2.28E-16    |
| RP11-519G16.5 | NAPSA    | 0.471573995 | 0           |
| RP11-519G16.5 | PLEKHA4  | 0.250745921 | 1.12E-07    |
| RP11-519G16.5 | SFTPA1   | 0.177894282 | 0.000179249 |
| RP11-519G16.5 | C1orf116 | 0.383159394 | 3.20E-18    |
| RP11-519G16.5 | TM4SF1   | 0.416218792 | 0           |
| RP11-519G16.5 | SEL1L3   | 0.400197721 | 0           |
| RP11-519G16.5 | VASN     | 0.471843202 | 0           |
| RP11-519G16.5 | NPTXR    | 0.503677695 | 0           |
| RP11-519G16.5 | PDE4C    | 0.450239421 | 0           |
| RP11-519G16.5 | CDC42EP1 | 0.432647787 | 0           |
| RP11-519G16.5 | ENDOD1   | 0.4459158   | 0           |
| RP11-519G16.5 | RYR1     | 0.332133202 | 1.23E-12    |
| RP11-519G16.5 | IL1RAP   | 0.350360834 | 5.39E-14    |
| RP11-519G16.5 | SLC35F2  | 0.344558785 | 1.11E-13    |
| RP11-519G16.5 | ISYNA1   | 0.224254433 | 2.21E-06    |
| RP11-519G16.5 | HLA-G    | 0.544085392 | 0           |
| RP11-519G16.5 | CDKN2B   | 0.565309333 | 0           |
| RP11-519G16.5 | ALDH1A3  | 0.523996715 | 0           |
| RP11-519G16.5 | CLIP3    | 0.286845315 | 1.10E-09    |
| RP11-519G16.5 | ULBP2    | 0.425480757 | 0           |
| RP11-519G16.5 | ETHE1    | 0.622468562 | 0           |
| RP11-519G16.5 | XPR1     | 0.419707277 | 0           |
| RP11-519G16.5 | SPTBN2   | 0.498882891 | 0           |

|               |          |             |             |
|---------------|----------|-------------|-------------|
| RP11-519G16.5 | IVL      | 0.540925596 | 9.95E-35    |
| RP11-519G16.5 | MARCO    | 0.512278273 | 0           |
| RP11-519G16.5 | PLXND1   | 0.144381264 | 0.00244702  |
| RP11-519G16.5 | EMILIN2  | 0.484769387 | 0           |
| RP11-519G16.5 | PLAUR    | 0.578633371 | 0           |
| RP11-519G16.5 | CDC42EP5 | 0.443476343 | 0           |
| RP11-519G16.5 | TRPC5    | 0.036250845 | 0.448676672 |
| RP11-519G16.5 | TMEM100  | 0.405764545 | 0           |
| RP11-519G16.5 | QSOX1    | 0.392739925 | 0           |
| RP11-519G16.5 | ARHGAP23 | 0.204503613 | 1.64E-05    |
| RP11-519G16.5 | MDFI     | 0.326788921 | 2.93E-12    |
| RP11-519G16.5 | FSTL3    | 0.488816568 | 0           |
| RP11-519G16.5 | INF2     | 0.246157916 | 1.93E-07    |
| RP11-519G16.5 | TGFBR1   | 0.424041394 | 0           |
| RP11-519G16.5 | TGFBI    | 0.434335224 | 0           |
| RP11-519G16.5 | ERBB3    | 0.539938641 | 0           |
| RP11-519G16.5 | CCL18    | 0.300334594 | 1.64E-10    |
| RP11-519G16.5 | CCL17    | 0.602651879 | 9.46E-45    |
| RP11-519G16.5 | C16orf45 | 0.212570174 | 7.39E-06    |
| RP11-519G16.5 | PRDM1    | 0.207608002 | 1.21E-05    |
| RP11-519G16.5 | TRIM47   | 0.599129829 | 0           |
| RP11-519G16.5 | CNFN     | 0.472118224 | 0           |
| RP11-519G16.5 | ARMCX3   | 0.171063381 | 0.000323625 |
| RP11-519G16.5 | RAMP1    | 0.20816528  | 1.15E-05    |
| RP11-519G16.5 | GABRD    | 0.040215791 | 0.400451549 |
| RP11-519G16.5 | COL13A1  | 0.294275595 | 3.91E-10    |
| RP11-519G16.5 | S100A5   | 0.368661937 | 1.47E-15    |
| RP11-519G16.5 | MISP     | 0.498091865 | 0           |
| RP11-519G16.5 | HES6     | 0.226609071 | 1.72E-06    |
| RP11-519G16.5 | PSD3     | 0.345320509 | 1.32E-13    |
| RP11-519G16.5 | DOK7     | 0.293820298 | 4.17E-10    |
| RP11-519G16.5 | ZMAT3    | 0.354212988 | 2.66E-14    |
| RP11-519G16.5 | MFAP2    | 0.376375324 | 2.11E-16    |
| RP11-519G16.5 | TMEM79   | 0.448641626 | 0           |
| RP11-519G16.5 | SLC1A5   | 0.453496427 | 0           |
| RP11-519G16.5 | BBC3     | 0.473122147 | 0           |
| RP11-519G16.5 | HLA-DQB2 | 0.529364967 | 0           |
| RP11-519G16.5 | C1QL1    | 0.175012978 | 0.000233585 |
| RP11-519G16.5 | TMEM215  | 0.129376707 | 0.006638967 |
| RP11-519G16.5 | PNP      | 0.436768156 | 0           |
| RP11-519G16.5 | ARNTL    | 0.408931342 | 0           |
| RP11-519G16.5 | CLDN2    | 0.297458005 | 2.03E-10    |
| RP11-519G16.5 | MVP      | 0.582627363 | 0           |
| RP11-519G16.5 | LGALS1   | 0.465018566 | 0           |
| RP11-519G16.5 | BIRC7    | 0.402731785 | 1.51E-18    |
| RP11-519G16.5 | COL8A1   | 0.444939535 | 0           |
| RP11-519G16.5 | PERP     | 0.586325057 | 0           |
| RP11-519G16.5 | GJA4     | 0.098105481 | 0.039948156 |
| RP11-519G16.5 | IGFL2    | 0.455389088 | 7.33E-24    |
| RP11-519G16.5 | DAPK2    | 0.351753532 | 4.19E-14    |
| RP11-519G16.5 | MAMLD1   | 0.482470774 | 0           |

|               |           |             |             |
|---------------|-----------|-------------|-------------|
| RP11-519G16.5 | ETV5      | 0.045782757 | 0.338418824 |
| RP11-519G16.5 | RUNX1     | 0.579351492 | 0           |
| RP11-519G16.5 | LONRF2    | 0.130900212 | 0.00605201  |
| RP11-519G16.5 | SPOCK1    | 0.038207377 | 0.424406383 |
| RP11-519G16.5 | XKRX      | 0.262463796 | 2.69E-08    |
| RP11-519G16.5 | TGFB1     | 0.254565595 | 7.10E-08    |
| RP11-519G16.5 | ERP27     | 0.351363906 | 4.50E-14    |
| RP11-519G16.5 | TNFRSF10C | 0.334468692 | 8.38E-13    |
| RP11-519G16.5 | PALM      | 0.364547809 | 3.55E-15    |
| RP11-519G16.5 | TSC22D1   | 0.074251738 | 0.120285357 |
| RP11-519G16.5 | TGM2      | 0.578273246 | 0           |
| RP11-519G16.5 | UBE2QL1   | 0.191716144 | 5.45E-05    |
| RP11-519G16.5 | ECE1      | 0.353354164 | 3.12E-14    |
| RP11-519G16.5 | COL8A2    | 0.457876216 | 0           |
| RP11-519G16.5 | HIST3H2A  | 0.425488416 | 0           |
| RP11-519G16.5 | TNFRSF21  | 0.413046179 | 0           |
| RP11-519G16.5 | SOX4      | 0.505382435 | 0           |
| RP11-519G16.5 | ELF3      | 0.55864781  | 0           |
| RP11-519G16.5 | TPD52L1   | 0.323324407 | 5.09E-12    |
| RP11-519G16.5 | INHBB     | 0.219507712 | 3.64E-06    |
| RP11-519G16.5 | HPN       | 0.314246689 | 2.08E-11    |
| RP11-519G16.5 | MMP7      | 0.584725444 | 1.28E-41    |
| RP11-519G16.5 | RAB27A    | 0.308169961 | 5.21E-11    |
| RP11-519G16.5 | IGF2BP2   | 0.340694633 | 2.94E-13    |
| RP11-519G16.5 | ITGB4     | 0.407789412 | 0           |
| RP11-519G16.5 | PPP1R1B   | 0.35583135  | 1.97E-14    |
| RP11-519G16.5 | NPDC1     | 0.200597702 | 2.38E-05    |
| RP11-519G16.5 | CCL13     | 0.5655764   | 1.77E-38    |
| RP11-519G16.5 | SPINT1    | 0.579456877 | 0           |
| RP11-519G16.5 | HEY2      | 0.195540924 | 3.83E-05    |
| RP11-519G16.5 | CST2      | 0.579565026 | 9.44E-41    |
| RP11-519G16.5 | ADM       | 0.220488374 | 3.28E-06    |
| RP11-519G16.5 | VSTM2L    | 0.53462216  | 0           |
| RP11-519G16.5 | FAM84A    | 0.503692588 | 0           |
| RP11-519G16.5 | P4HA2     | 0.408032379 | 0           |
| RP11-519G16.5 | LPL       | 0.204137531 | 1.70E-05    |
| RP11-519G16.5 | TMEM173   | 0.351919056 | 4.06E-14    |
| RP11-519G16.5 | DHRS3     | 0.334065449 | 8.95E-13    |
| RP11-519G16.5 | SCN1B     | 0.454072995 | 0           |
| RP11-519G16.5 | GLT1D1    | 0.055252087 | 0.247884335 |
| RP11-519G16.5 | PHYHIP    | 0.41490382  | 0           |
| RP11-519G16.5 | BHLHE40   | 0.464859142 | 0           |
| RP11-519G16.5 | BID       | 0.410529421 | 0           |
| RP11-519G16.5 | POSTN     | 0.529559567 | 0           |
| RP11-519G16.5 | ITGA3     | 0.630239393 | 0           |
| RP11-519G16.5 | RSPO4     | 0.390393087 | 0           |
| RP11-519G16.5 | ADAMTS9   | 0.038555304 | 0.420197761 |
| RP11-519G16.5 | ABTB2     | 0.514791911 | 0           |
| RP11-519G16.5 | KCNQ3     | 0.551702755 | 0           |
| RP11-519G16.5 | ANXA1     | 0.342557948 | 2.13E-13    |
| RP11-519G16.5 | S100A11   | 0.619447289 | 0           |

|               |            |              |             |
|---------------|------------|--------------|-------------|
| RP11-519G16.5 | CEACAM6    | 0.560154093  | 1.26E-37    |
| RP11-519G16.5 | IER5L      | 0.425886553  | 0           |
| RP11-519G16.5 | KRT80      | 0.479635167  | 0           |
| RP11-519G16.5 | CDH6       | 0.569774224  | 0           |
| RP11-519G16.5 | UNC5B      | 0.248653398  | 1.44E-07    |
| RP11-519G16.5 | PLEKHN1    | 0.528433522  | 0           |
| RP11-519G16.5 | SYTL1      | 0.373891472  | 4.21E-16    |
| RP11-519G16.5 | TMEM163    | 0.459389193  | 0           |
| RP11-519G16.5 | C4orf48    | 0.211553485  | 8.19E-06    |
| RP11-519G16.5 | B3GNT7     | 0.312733145  | 2.62E-11    |
| RP11-519G16.5 | BAIAP3     | 0.271018277  | 9.08E-09    |
| RP11-519G16.5 | PHLDA2     | 0.452387119  | 0           |
| RP11-519G16.5 | GAP43      | 0.455783833  | 6.63E-24    |
| RP11-519G16.5 | S100A1     | 0.432252203  | 0           |
| RP11-519G16.5 | PTPRE      | 0.523890763  | 0           |
| RP11-519G16.5 | CCND1      | 0.333890139  | 9.22E-13    |
| RP11-519G16.5 | ST6GALNAC5 | 0.613082499  | 1.15E-46    |
| RP11-519G16.5 | KRT17      | 0.293212668  | 4.54E-10    |
| RP11-519G16.5 | HPCAL4     | 0.216119506  | 5.16E-06    |
| RP11-519G16.5 | GABBR2     | 0.375935203  | 2.40E-16    |
| RP11-519G16.5 | DIRAS3     | 0.165647189  | 0.000500416 |
| RP11-519G16.5 | SERINC2    | 0.438762811  | 0           |
| RP11-519G16.5 | PTCHD4     | 0.278172542  | 3.56E-09    |
| RP11-519G16.5 | EPS8       | 0.155141596  | 0.001123364 |
| RP11-519G16.5 | LY6E       | 0.328505576  | 2.22E-12    |
| RP11-519G16.5 | UPP1       | 0.514514619  | 0           |
| RP11-519G16.5 | AHNAK2     | 0.601293271  | 0           |
| RP11-519G16.5 | PLXNC1     | 0.391243685  | 0           |
| RP11-519G16.5 | TNC        | 0.432771327  | 0           |
| RP11-519G16.5 | DUSP4      | 0.271148767  | 8.92E-09    |
| RP11-519G16.5 | NRCAM      | 0.274108483  | 6.07E-09    |
| RP11-519G16.5 | NRP2       | 0.297713869  | 2.40E-10    |
| RP11-519G16.5 | CTSC       | 0.610684875  | 0           |
| RP11-519G16.5 | AMIGO2     | 0.28413963   | 1.59E-09    |
| RP11-519G16.5 | NAB2       | 0.247224531  | 1.70E-07    |
| RP11-519G16.5 | TBC1D2     | 0.562590882  | 0           |
| RP11-519G16.5 | PHLDA3     | 0.471510452  | 0           |
| RP11-519G16.5 | PTP4A3     | 0.519897196  | 0           |
| RP11-519G16.5 | CRABP2     | 0.432623817  | 0           |
| RP11-519G16.5 | GOS2       | 0.266619624  | 1.59E-08    |
| RP11-519G16.5 | S100A6     | 0.578861445  | 0           |
| RP11-519G16.5 | FOXQ1      | 0.538838552  | 0           |
| RP11-519G16.5 | LRG1       | 0.468994119  | 0           |
| RP11-519G16.5 | LAMP5      | 0.455988647  | 0           |
| RP11-519G16.5 | ALDH3B1    | 0.474235994  | 0           |
| RP11-519G16.5 | CDH2       | -0.162652014 | 0.00063328  |
| RP11-519G16.5 | SCG5       | 0.114935024  | 0.016025111 |
| RP11-519G16.5 | ZCCHC16    | 0.071429838  | 0.135106764 |
| RP11-519G16.5 | GRB7       | 0.472712522  | 0           |
| RP11-519G16.5 | TIAM1      | 0.324724623  | 4.07E-12    |
| RP11-519G16.5 | FXYD5      | 0.359682086  | 9.42E-15    |

|               |         |             |             |
|---------------|---------|-------------|-------------|
| RP11-519G16.5 | CLDN9   | 0.394381973 | 0           |
| RP11-519G16.5 | FAM43A  | 0.305271661 | 8.00E-11    |
| RP11-519G16.5 | CHST2   | 0.357192419 | 1.52E-14    |
| RP11-519G16.5 | HMGA2   | 0.311635751 | 3.10E-11    |
| RP11-519G16.5 | GALNT7  | 0.337200901 | 5.31E-13    |
| RP11-519G16.5 | CBLN1   | 0.478398347 | 0           |
| RP11-519G16.5 | STRA6   | 0.408878012 | 0           |
| RP11-519G16.5 | MUC21   | 0.541206411 | 9.05E-35    |
| RP11-519G16.5 | PRR36   | 0.377108764 | 1.69E-16    |
| RP11-519G16.5 | NFE2L3  | 0.537117501 | 0           |
| RP11-519G16.5 | NR1D1   | 0.383370447 | 1.01E-18    |
| RP11-519G16.5 | MUC1    | 0.618032038 | 0           |
| RP11-519G16.5 | NAT8L   | -0.01708329 | 0.721032184 |
| RP11-519G16.5 | APOC1   | 0.087847962 | 0.065940823 |
| RP11-519G16.5 | EVA1A   | 0.472217085 | 0           |
| RP11-519G16.5 | ENTPD1  | 0.095650139 | 0.045210741 |
| RP11-519G16.5 | COL1A1  | 0.577700934 | 0           |
| RP11-519G16.5 | FNDC4   | 0.443374362 | 0           |
| RP11-519G16.5 | FRMD3   | 0.154393121 | 0.001187799 |
| RP11-519G16.5 | SHROOM4 | 0.352760151 | 3.48E-14    |
| RP11-519G16.5 | NELL2   | 0.091675011 | 0.054960896 |
| RP11-519G16.5 | EPHB3   | 0.510870681 | 0           |
| RP11-519G16.5 | TMC6    | 0.391851031 | 0           |
| RP11-519G16.5 | NOD1    | 0.345962039 | 1.18E-13    |
| RP11-519G16.5 | GGCT    | 0.49943251  | 0           |
| RP11-519G16.5 | ICAM1   | 0.589815952 | 0           |
| RP11-519G16.5 | PRSS23  | 0.363049867 | 4.82E-15    |
| RP11-519G16.5 | CFI     | 0.493997878 | 0           |
| RP11-519G16.5 | CD55    | 0.514849355 | 0           |
| RP11-519G16.5 | RASD2   | 0.248524043 | 1.46E-07    |
| RP11-519G16.5 | KLK11   | 0.311204776 | 2.59E-11    |
| RP11-519G16.5 | ICAM5   | 0.368514852 | 1.52E-15    |
| RP11-519G16.5 | ADORA1  | 0.435395314 | 0           |
| RP11-519G16.5 | ITGA2   | 0.640602439 | 0           |
| RP11-519G16.5 | ABCC3   | 0.155942408 | 0.001058004 |
| RP11-519G16.5 | MFGE8   | 0.414846376 | 0           |
| RP11-519G16.5 | STK32A  | 0.32826502  | 2.31E-12    |
| RP11-519G16.5 | CYSLTR2 | 0.222352823 | 2.70E-06    |
| RP11-519G16.5 | LAD1    | 0.408700431 | 0           |
| RP11-519G16.5 | MGAT3   | 0.396935325 | 0           |
| RP11-519G16.5 | IGFBP6  | 0.414526959 | 0           |
| RP11-519G16.5 | CYP2S1  | 0.571960359 | 0           |
| RP11-519G16.5 | KCNJ2   | 0.376515743 | 2.02E-16    |
| RP11-519G16.5 | FAM20A  | 0.476417166 | 0           |
| RP11-519G16.5 | TGFA    | 0.197485937 | 3.20E-05    |
| RP11-519G16.5 | MXRA8   | 0.426065977 | 0           |
| RP11-519G16.5 | C8orf4  | 0.414838717 | 0           |
| RP11-519G16.5 | CLDN10  | 0.540908769 | 1.00E-34    |
| RP11-519G16.5 | PDE5A   | 0.264871056 | 1.99E-08    |
| RP11-519G16.5 | APOE    | 0.054839341 | 0.25143882  |
| RP11-519G16.5 | SPOCK2  | 0.327111884 | 2.78E-12    |

|               |           |             |             |
|---------------|-----------|-------------|-------------|
| RP11-519G16.5 | TENM1     | 0.180603772 | 0.000145492 |
| RP11-519G16.5 | SLIT1     | 0.121047921 | 0.01117635  |
| RP11-519G16.5 | CXCL14    | 0.291094047 | 6.12E-10    |
| RP11-519G16.5 | ECM1      | 0.262319548 | 2.74E-08    |
| RP11-519G16.5 | DUSP5     | 0.474593282 | 0           |
| RP11-519G16.5 | SEZ6L2    | 0.473602266 | 0           |
| RP11-519G16.5 | THRSP     | 0.187416777 | 8.02E-05    |
| RP11-519G16.5 | C19orf33  | 0.456250479 | 0           |
| RP11-519G16.5 | MPZL2     | 0.429011083 | 0           |
| RP11-519G16.5 | CTSH      | 0.389958498 | 0           |
| RP11-519G16.5 | CYP1B1    | 0.34859411  | 7.40E-14    |
| RP11-519G16.5 | ALOX5     | 0.653896124 | 0           |
| RP11-519G16.5 | SYTL5     | 0.342360026 | 1.62E-13    |
| RP11-519G16.5 | TNFRSF12A | 0.306809601 | 6.37E-11    |
| RP11-519G16.5 | DUSP6     | 0.322493525 | 5.80E-12    |
| RP11-519G16.5 | ALOX15B   | 0.619482181 | 0           |
| RP11-519G16.5 | SDC4      | 0.304057251 | 9.56E-11    |
| RP11-519G16.5 | MDK       | 0.430208047 | 0           |
| RP11-519G16.5 | KRT19     | 0.573874451 | 0           |
| RP11-519G16.5 | MET       | 0.478493945 | 0           |
| RP11-519G16.5 | TESC      | 0.082862387 | 0.082885062 |
| RP11-519G16.5 | CXCL17    | 0.663957294 | 3.93E-57    |
| RP11-519G16.5 | NPC2      | 0.371128768 | 8.34E-16    |
| RP11-519G16.5 | COMP      | 0.474311877 | 0           |
| RP11-519G16.5 | TUSC3     | 0.269252263 | 1.14E-08    |
| RP11-519G16.5 | TMPRSS4   | 0.576189943 | 0           |
| RP11-519G16.5 | LGALS3    | 0.529696582 | 0           |
| RP11-519G16.5 | CRLF1     | 0.327690154 | 2.53E-12    |
| RP11-519G16.5 | CTXN1     | 0.418637115 | 0           |
| RP11-519G16.5 | PCSK1N    | 0.241545089 | 3.28E-07    |
| RP11-519G16.5 | NMU       | 0.51225012  | 9.73E-31    |
| RP11-519G16.5 | GALE      | 0.396234082 | 0           |
| RP11-519G16.5 | PCSK2     | 0.365926182 | 2.66E-15    |
| RP11-519G16.5 | GJB3      | 0.335126391 | 7.51E-13    |
| RP11-519G16.5 | SLPI      | 0.501934375 | 0           |
| RP11-519G16.5 | AGR2      | 0.164925805 | 0.000529808 |
| RP11-519G16.5 | MRC2      | 0.339195982 | 3.79E-13    |
| RP11-519G16.5 | GOLT1A    | 0.299106852 | 1.96E-10    |
| RP11-519G16.5 | SLC27A6   | 0.420211735 | 3.29E-20    |
| RP11-519G16.5 | KCNN4     | 0.579063705 | 0           |
| RP11-519G16.5 | ETV4      | 0.158686182 | 0.000848312 |
| RP11-519G16.5 | SYT12     | 0.340774629 | 2.90E-13    |
| RP11-519G16.5 | PVRL4     | 0.610838201 | 0           |
| RP11-519G16.5 | PLCD3     | 0.315793706 | 1.64E-11    |
| RP11-519G16.5 | PLAU      | 0.573963241 | 0           |
| RP11-519G16.5 | LRRK2     | 0.082834303 | 0.08298964  |
| RP11-519G16.5 | SFN       | 0.615143809 | 0           |
| RP11-519G16.5 | LPAR5     | 0.327223935 | 2.73E-12    |
| RP11-519G16.5 | NGEF      | 0.564420014 | 0           |
| RP11-519G16.5 | DTX4      | 0.540499891 | 0           |
| RP11-519G16.5 | CST6      | 0.439037266 | 0           |

|               |          |              |             |
|---------------|----------|--------------|-------------|
| RP11-519G16.5 | QPCT     | 0.317330228  | 1.30E-11    |
| RP11-519G16.5 | TIMP1    | 0.394328926  | 0           |
| RP11-519G16.5 | CAMK2N1  | 0.320411923  | 8.04E-12    |
| RP11-519G16.5 | KLHDC8A  | 0.252769086  | 8.81E-08    |
| RP11-519G16.5 | PDLIM4   | 0.533109325  | 0           |
| RP11-519G16.5 | SCEL     | 0.397152478  | 0           |
| RP11-519G16.5 | LCN2     | 0.667465683  | 0           |
| RP11-519G16.5 | PROS1    | 0.513556793  | 0           |
| RP11-519G16.5 | GABRB2   | 0.474520803  | 0           |
| RP11-519G16.5 | TMPRSS6  | 0.61657069   | 0           |
| RP11-519G16.5 | KLK7     | 0.395292643  | 7.18E-18    |
| RP11-519G16.5 | PDZK1IP1 | 0.56505516   | 0           |
| RP11-519G16.5 | CDH3     | 0.257964155  | 4.69E-08    |
| RP11-519G16.5 | LRP4     | 0.071904192  | 0.13248855  |
| RP11-519G16.5 | IGSF1    | 0.299320033  | 1.90E-10    |
| RP11-519G16.5 | B3GNT3   | 0.571998939  | 0           |
| RP11-519G16.5 | CLDN1    | 0.417406678  | 0           |
| RP11-519G16.5 | GDF15    | 0.504304331  | 0           |
| RP11-519G16.5 | ARHGAP36 | 0.410453441  | 2.86E-19    |
| RP11-519G16.5 | LAMB3    | 0.411587384  | 0           |
| RP11-519G16.5 | KLK10    | 0.554658073  | 0           |
| RP11-519G16.5 | DPP4     | 0.486010178  | 0           |
| RP11-519G16.5 | METTL7B  | 0.1926917    | 4.98E-05    |
| RP11-519G16.5 | LIPH     | 0.510131426  | 0           |
| RP11-519G16.5 | CLDN16   | 0.387601023  | 0           |
| RP11-519G16.5 | CHI3L1   | 0.558217618  | 0           |
| RP11-519G16.5 | SLC22A31 | 0.393486908  | 1.04E-17    |
| RP11-519G16.5 | TACSTD2  | 0.50168233   | 0           |
| RP11-519G16.5 | SFTPB    | 0.696392798  | 0           |
| RP11-519G16.5 | RXRG     | 0.216869116  | 4.78E-06    |
| RP11-519G16.5 | DCSTAMP  | 0.506985044  | 4.79E-30    |
| RP11-519G16.5 | CITED1   | 0.419968541  | 0           |
| RP11-519G16.5 | SERPINA1 | 0.601429576  | 0           |
| RP11-519G16.5 | PRR15    | 0.200023829  | 2.52E-05    |
| RP11-519G16.5 | SLC34A2  | 0.56690344   | 0           |
| RP11-519G16.5 | FN1      | 0.626999974  | 0           |
| RP11-519G16.5 | ZCCHC12  | 0.173274764  | 0.000269857 |
| RP11-547C5.1  | TFF3     | -0.388528761 | 2.87E-17    |
| RP11-547C5.1  | CCL21    | -0.295501347 | 2.70E-10    |
| RP11-547C5.1  | TPO      | -0.490468804 | 5.97E-28    |
| RP11-547C5.1  | MT1G     | -0.401645262 | 1.90E-18    |
| RP11-547C5.1  | DIO1     | -0.484104692 | 3.57E-27    |
| RP11-547C5.1  | DPT      | -0.293533219 | 3.58E-10    |
| RP11-547C5.1  | CDH16    | -0.500823242 | 2.99E-29    |
| RP11-547C5.1  | CRABP1   | -0.302548954 | 9.58E-11    |
| RP11-547C5.1  | SLC26A7  | -0.347778856 | 6.31E-14    |
| RP11-547C5.1  | MT1H     | -0.388370724 | 2.96E-17    |
| RP11-547C5.1  | SLC26A4  | -0.34890125  | 5.18E-14    |
| RP11-547C5.1  | SLC5A8   | -0.403990664 | 1.15E-18    |
| RP11-547C5.1  | PKHD1L1  | -0.489712153 | 7.39E-28    |
| RP11-547C5.1  | TFCP2L1  | -0.487425469 | 1.41E-27    |

|              |           |              |             |
|--------------|-----------|--------------|-------------|
| RP11-547C5.1 | WSCD2     | -0.395434075 | 6.98E-18    |
| RP11-547C5.1 | IPCEF1    | -0.44769578  | 5.02E-23    |
| RP11-547C5.1 | SLC5A5    | -0.383734284 | 7.52E-17    |
| RP11-547C5.1 | MT1F      | -0.444886743 | 1.00E-22    |
| RP11-547C5.1 | FOSB      | -0.215156253 | 5.40E-06    |
| RP11-547C5.1 | SEMA3D    | -0.481946133 | 6.50E-27    |
| RP11-547C5.1 | BMP8A     | -0.39587378  | 6.37E-18    |
| RP11-547C5.1 | MATN2     | -0.442132485 | 1.96E-22    |
| RP11-547C5.1 | PLA2R1    | -0.481950302 | 6.49E-27    |
| RP11-547C5.1 | COL23A1   | -0.321820882 | 4.90E-12    |
| RP11-547C5.1 | HGD       | -0.404069996 | 1.13E-18    |
| RP11-547C5.1 | TCEAL2    | -0.327619044 | 1.92E-12    |
| RP11-547C5.1 | CHRD1     | -0.267037227 | 1.33E-08    |
| RP11-547C5.1 | TNFRSF11B | -0.406389857 | 6.90E-19    |
| RP11-547C5.1 | FAM167A   | -0.381184309 | 1.25E-16    |
| RP11-547C5.1 | KIT       | -0.506707261 | 5.21E-30    |
| RP11-547C5.1 | SLC4A4    | -0.512091887 | 1.02E-30    |
| RP11-547C5.1 | SMOC2     | -0.298817265 | 1.66E-10    |
| RP11-547C5.1 | FHL1      | -0.383032875 | 8.65E-17    |
| RP11-547C5.1 | OTOS      | -0.397613356 | 4.43E-18    |
| RP11-547C5.1 | IGFBPL1   | -0.458111447 | 3.67E-24    |
| RP11-547C5.1 | HBB       | -0.234263066 | 6.92E-07    |
| RP11-547C5.1 | BEX1      | -0.254338723 | 6.56E-08    |
| RP11-547C5.1 | FABP4     | -0.293459787 | 3.62E-10    |
| RP11-547C5.1 | LMOD1     | -0.360583998 | 6.32E-15    |
| RP11-547C5.1 | SOD3      | -0.372188978 | 7.17E-16    |
| RP11-547C5.1 | TMEM171   | -0.41753603  | 5.99E-20    |
| RP11-547C5.1 | PI16      | -0.230572321 | 1.04E-06    |
| RP11-547C5.1 | ZMAT4     | -0.459824268 | 2.37E-24    |
| RP11-547C5.1 | MFAP4     | -0.132993281 | 0.005254843 |
| RP11-547C5.1 | CWH43     | -0.468101473 | 2.74E-25    |
| RP11-547C5.1 | SPX       | -0.342473418 | 1.59E-13    |
| RP11-547C5.1 | APOD      | -0.233842435 | 7.25E-07    |
| RP11-547C5.1 | DPP6      | -0.441346142 | 2.37E-22    |
| RP11-547C5.1 | MMRN1     | -0.325917359 | 2.54E-12    |
| RP11-547C5.1 | WDR72     | -0.447207455 | 5.66E-23    |
| RP11-547C5.1 | MPPED2    | -0.379181484 | 1.85E-16    |
| RP11-547C5.1 | PAPSS2    | -0.44934595  | 3.34E-23    |
| RP11-547C5.1 | DCN       | -0.224561715 | 2.01E-06    |
| RP11-547C5.1 | SORBS2    | -0.448818032 | 3.80E-23    |
| RP11-547C5.1 | EGR2      | -0.183744259 | 0.000107987 |
| RP11-547C5.1 | EDN3      | -0.212153309 | 7.34E-06    |
| RP11-547C5.1 | DIO2      | -0.404629136 | 1.01E-18    |
| RP11-547C5.1 | ITPR1     | -0.488579084 | 1.02E-27    |
| RP11-547C5.1 | CFD       | -0.195127711 | 3.85E-05    |
| RP11-547C5.1 | CPXM1     | -0.311709117 | 2.40E-11    |
| RP11-547C5.1 | ELMO1     | -0.461229932 | 1.65E-24    |
| RP11-547C5.1 | GPC3      | -0.333059098 | 7.83E-13    |
| RP11-547C5.1 | MYOC      | -0.074083345 | 0.121159916 |
| RP11-547C5.1 | DEPTOR    | -0.50337797  | 1.41E-29    |
| RP11-547C5.1 | DGKI      | -0.493073344 | 2.84E-28    |



|              |            |              |             |
|--------------|------------|--------------|-------------|
| RP11-547C5.1 | CARTPT     | -0.286054522 | 1.03E-09    |
| RP11-547C5.1 | IYD        | -0.425522073 | 9.83E-21    |
| RP11-547C5.1 | LYVE1      | -0.302193246 | 1.01E-10    |
| RP11-547C5.1 | CLCNKB     | -0.370512127 | 9.87E-16    |
| RP11-547C5.1 | NCAM1      | -0.522325272 | 4.26E-32    |
| RP11-547C5.1 | HBA2       | -0.184765469 | 9.87E-05    |
| RP11-547C5.1 | GLT8D2     | -0.32253045  | 4.38E-12    |
| RP11-547C5.1 | OGDHL      | -0.491564519 | 4.37E-28    |
| RP11-547C5.1 | LIFR       | -0.3930541   | 1.14E-17    |
| RP11-547C5.1 | CSGALNACT1 | -0.546104872 | 1.72E-35    |
| RP11-547C5.1 | RAP1GAP    | -0.389835217 | 2.20E-17    |
| RP11-547C5.1 | COL9A3     | -0.300525053 | 1.29E-10    |
| RP11-547C5.1 | FBLN1      | -0.256707686 | 4.90E-08    |
| RP11-547C5.1 | EFEMP1     | -0.416861515 | 6.97E-20    |
| RP11-547C5.1 | AOX1       | -0.42023964  | 3.27E-20    |
| RP11-547C5.1 | GRIN2C     | -0.426329277 | 8.17E-21    |
| RP11-547C5.1 | C11orf74   | -0.337741027 | 3.57E-13    |
| RP11-547C5.1 | PPARGC1A   | -0.531239287 | 2.45E-33    |
| RP11-547C5.1 | ANGPTL1    | -0.266498301 | 1.42E-08    |
| RP11-547C5.1 | SCARA5     | -0.283636813 | 1.44E-09    |
| RP11-547C5.1 | LTF        | -0.346344535 | 8.12E-14    |
| RP11-547C5.1 | CA4        | -0.179444981 | 0.000156958 |
| RP11-547C5.1 | TG         | -0.254640857 | 6.32E-08    |
| RP11-547C5.1 | FCGBP      | -0.365715734 | 2.44E-15    |
| RP11-547C5.1 | PBX4       | -0.367266707 | 1.82E-15    |
| RP11-547C5.1 | CYR61      | -0.23905648  | 4.02E-07    |
| RP11-547C5.1 | FOS        | -0.242567137 | 2.68E-07    |
| RP11-547C5.1 | KHDRBS2    | -0.403370363 | 1.32E-18    |
| RP11-547C5.1 | MUM1L1     | -0.49283947  | 3.03E-28    |
| RP11-547C5.1 | RGS16      | -0.406669852 | 6.50E-19    |
| RP11-547C5.1 | MT1M       | -0.389142395 | 2.54E-17    |
| RP11-547C5.1 | LRP2       | -0.39314904  | 1.12E-17    |
| RP11-547C5.1 | MAFB       | -0.449705985 | 3.05E-23    |
| RP11-547C5.1 | KCNK2      | -0.42556039  | 9.75E-21    |
| RP11-547C5.1 | TBC1D4     | -0.344148423 | 1.19E-13    |
| RP11-547C5.1 | MIOX       | -0.364794373 | 2.90E-15    |
| RP11-547C5.1 | TPPP       | -0.412527618 | 1.82E-19    |
| RP11-547C5.1 | FMOD       | -0.512068187 | 1.03E-30    |
| RP11-547C5.1 | CITED2     | -0.438803335 | 4.37E-22    |
| RP11-547C5.1 | RGS8       | -0.438209313 | 5.03E-22    |
| RP11-547C5.1 | ABI3BP     | -0.345935966 | 8.72E-14    |
| RP11-547C5.1 | ADH1B      | -0.261973341 | 2.53E-08    |
| RP11-547C5.1 | OGN        | -0.254173674 | 6.69E-08    |
| RP11-547C5.1 | NR4A1      | -0.223007478 | 2.37E-06    |
| RP11-547C5.1 | FOXJ1      | -0.301092087 | 1.19E-10    |
| RP11-547C5.1 | ALDH1A1    | -0.404962491 | 9.37E-19    |
| RP11-547C5.1 | OCA2       | -0.430443994 | 3.15E-21    |
| RP11-547C5.1 | TMEM139    | -0.376066481 | 3.39E-16    |
| RP11-547C5.1 | ARHGAP24   | -0.397671115 | 4.38E-18    |
| RP11-547C5.1 | SLC25A15   | -0.537050079 | 3.63E-34    |
| RP11-547C5.1 | DES        | -0.23338392  | 7.64E-07    |

|              |          |              |             |
|--------------|----------|--------------|-------------|
| RP11-547C5.1 | GDF10    | -0.33085448  | 1.13E-12    |
| RP11-547C5.1 | KIAA1324 | -0.390625108 | 1.88E-17    |
| RP11-547C5.1 | JUN      | -0.218545432 | 3.80E-06    |
| RP11-547C5.1 | C7       | -0.130675549 | 0.006108178 |
| RP11-547C5.1 | LGI3     | -0.340705175 | 2.15E-13    |
| RP11-547C5.1 | CDON     | -0.403353901 | 1.32E-18    |
| RP11-547C5.1 | BCL2     | -0.56686952  | 1.10E-38    |
| RP11-547C5.1 | HLF      | -0.297100111 | 2.14E-10    |
| RP11-547C5.1 | EGR1     | -0.203604491 | 1.72E-05    |
| RP11-547C5.1 | IP6K3    | -0.479556079 | 1.26E-26    |
| RP11-547C5.1 | SCUBE3   | -0.513781793 | 6.09E-31    |
| RP11-547C5.1 | PKNOX2   | -0.373234739 | 5.86E-16    |
| RP11-547C5.1 | SMAD9    | -0.570286514 | 3.12E-39    |
| RP11-547C5.1 | IQGAP2   | -0.489793012 | 7.23E-28    |
| RP11-547C5.1 | GNA14    | -0.383769974 | 7.47E-17    |
| RP11-547C5.1 | LAYN     | -0.347937231 | 6.14E-14    |
| RP11-547C5.1 | AVPR1A   | -0.354839338 | 1.80E-14    |
| RP11-547C5.1 | PDLIM3   | -0.469270186 | 2.01E-25    |
| RP11-547C5.1 | GPM6A    | -0.336577052 | 4.34E-13    |
| RP11-547C5.1 | SDPR     | -0.180149589 | 0.000147713 |
| RP11-547C5.1 | CRYAB    | -0.296951954 | 2.18E-10    |
| RP11-547C5.1 | FOXA2    | -0.343047146 | 1.44E-13    |
| RP11-547C5.1 | C8orf88  | -0.375126446 | 4.07E-16    |
| RP11-547C5.1 | ISM1     | -0.338250922 | 3.27E-13    |
| RP11-547C5.1 | BMP2     | -0.386160508 | 4.63E-17    |
| RP11-547C5.1 | ID4      | -0.460427695 | 2.03E-24    |
| RP11-547C5.1 | NUPR1    | -0.319312702 | 7.31E-12    |
| RP11-547C5.1 | SERTM1   | -0.524011551 | 2.50E-32    |
| RP11-547C5.1 | IRS1     | -0.366538406 | 2.09E-15    |
| RP11-547C5.1 | FIBIN    | -0.341784428 | 1.79E-13    |
| RP11-547C5.1 | PODN     | -0.236829999 | 5.18E-07    |
| RP11-547C5.1 | TDRD9    | -0.433284602 | 1.62E-21    |
| RP11-547C5.1 | EPHA3    | -0.286874815 | 9.20E-10    |
| RP11-547C5.1 | AIF1L    | -0.380884304 | 1.32E-16    |
| RP11-547C5.1 | EBF4     | -0.382860876 | 8.95E-17    |
| RP11-547C5.1 | ADM2     | -0.495410092 | 1.45E-28    |
| RP11-547C5.1 | GSTM3    | -0.335035587 | 5.63E-13    |
| RP11-547C5.1 | HSD17B6  | -0.349166912 | 4.94E-14    |
| RP11-547C5.1 | AGR3     | -0.240703151 | 3.32E-07    |
| RP11-547C5.1 | EPHB1    | -0.320035326 | 6.52E-12    |
| RP11-547C5.1 | TMOD1    | -0.218170355 | 3.95E-06    |
| RP11-547C5.1 | WASF3    | -0.40244239  | 1.60E-18    |
| RP11-547C5.1 | SELV     | -0.466456715 | 4.22E-25    |
| RP11-547C5.1 | ENPP1    | -0.237188188 | 4.97E-07    |
| RP11-547C5.1 | SYNE1    | -0.457610443 | 4.17E-24    |
| RP11-547C5.1 | PLCH1    | -0.386060175 | 4.72E-17    |
| RP11-547C5.1 | CCDC146  | -0.401630077 | 1.91E-18    |
| RP11-547C5.1 | SLC16A2  | -0.370900403 | 9.17E-16    |
| RP11-547C5.1 | IER2     | -0.203311581 | 1.77E-05    |
| RP11-547C5.1 | KCNAB1   | -0.254877143 | 6.14E-08    |
| RP11-547C5.1 | SYNDIG1  | -0.409814515 | 3.29E-19    |

|              |          |              |             |
|--------------|----------|--------------|-------------|
| RP11-547C5.1 | C16orf89 | -0.257715414 | 4.32E-08    |
| RP11-547C5.1 | CTGF     | -0.194258633 | 4.17E-05    |
| RP11-547C5.1 | NR4A3    | -0.247673328 | 1.47E-07    |
| RP11-547C5.1 | KIAA1456 | -0.396548437 | 5.53E-18    |
| RP11-547C5.1 | AQP4     | -0.222183102 | 2.59E-06    |
| RP11-547C5.1 | RNF150   | -0.502446307 | 1.85E-29    |
| RP11-547C5.1 | C1S      | -0.212704697 | 6.94E-06    |
| RP11-547C5.1 | PFKFB2   | -0.456325968 | 5.78E-24    |
| RP11-547C5.1 | PROX1    | -0.349204803 | 4.91E-14    |
| RP11-547C5.1 | TCF7L1   | -0.406155984 | 7.25E-19    |
| RP11-547C5.1 | HSPB6    | -0.168732503 | 0.000384135 |
| RP11-547C5.1 | FHDC1    | -0.360094396 | 6.92E-15    |
| RP11-547C5.1 | PRR15L   | -0.280535821 | 2.21E-09    |
| RP11-547C5.1 | SLC1A1   | -0.416240218 | 8.00E-20    |
| RP11-547C5.1 | BTBD11   | -0.356787669 | 1.26E-14    |
| RP11-547C5.1 | TRIM58   | -0.499926065 | 3.89E-29    |
| RP11-547C5.1 | LRIG1    | -0.488646067 | 1.00E-27    |
| RP11-547C5.1 | ROR2     | -0.504968111 | 8.76E-30    |
| RP11-547C5.1 | GPR125   | -0.475599104 | 3.69E-26    |
| RP11-547C5.1 | FLRT1    | -0.417110857 | 6.59E-20    |
| RP11-547C5.1 | PGF      | -0.325324869 | 2.79E-12    |
| RP11-547C5.1 | DUSP1    | -0.246593224 | 1.67E-07    |
| RP11-547C5.1 | PLA2G7   | -0.44430433  | 1.15E-22    |
| RP11-547C5.1 | PLSCR4   | -0.409251402 | 3.72E-19    |
| RP11-547C5.1 | FAM46B   | -0.395639481 | 6.69E-18    |
| RP11-547C5.1 | GLDC     | -0.40718656  | 5.81E-19    |
| RP11-547C5.1 | ZBTB16   | -0.352267439 | 2.85E-14    |
| RP11-547C5.1 | OMD      | -0.249290969 | 1.21E-07    |
| RP11-547C5.1 | HSD11B2  | -0.226785784 | 1.58E-06    |
| RP11-547C5.1 | FGL2     | -0.313545904 | 1.80E-11    |
| RP11-547C5.1 | CLCNKA   | -0.391643351 | 1.52E-17    |
| RP11-547C5.1 | GATM     | -0.321717143 | 4.99E-12    |
| RP11-547C5.1 | TNS3     | -0.551631128 | 2.55E-36    |
| RP11-547C5.1 | TOB1     | -0.434896739 | 1.11E-21    |
| RP11-547C5.1 | MARC2    | -0.385537791 | 5.24E-17    |
| RP11-547C5.1 | LRRC2    | -0.458607512 | 3.23E-24    |
| RP11-547C5.1 | SORD     | -0.340227636 | 2.34E-13    |
| RP11-547C5.1 | RIMS4    | -0.29223049  | 4.31E-10    |
| RP11-547C5.1 | SLC29A4  | -0.457185822 | 4.65E-24    |
| RP11-547C5.1 | SLC39A14 | -0.460736073 | 1.87E-24    |
| RP11-547C5.1 | FAXDC2   | -0.479595815 | 1.24E-26    |
| RP11-547C5.1 | HSPB8    | -0.470453319 | 1.47E-25    |
| RP11-547C5.1 | CCL19    | -0.060989109 | 0.202164892 |
| RP11-547C5.1 | KCNIP3   | -0.263111393 | 2.19E-08    |
| RP11-547C5.1 | CGNL1    | -0.277358661 | 3.40E-09    |
| RP11-547C5.1 | ATF3     | -0.127648391 | 0.007409238 |
| RP11-547C5.1 | SGCD     | -0.452493876 | 1.52E-23    |
| RP11-547C5.1 | STARD13  | -0.446153321 | 7.34E-23    |
| RP11-547C5.1 | LDHD     | -0.34621582  | 8.30E-14    |
| RP11-547C5.1 | RCAN1    | -0.359627501 | 7.53E-15    |
| RP11-547C5.1 | ID3      | -0.473871874 | 5.88E-26    |

|              |          |              |             |
|--------------|----------|--------------|-------------|
| RP11-547C5.1 | SYTL3    | -0.349323301 | 4.81E-14    |
| RP11-547C5.1 | MT1E     | -0.303949001 | 7.78E-11    |
| RP11-547C5.1 | CAMK1D   | -0.339449524 | 2.67E-13    |
| RP11-547C5.1 | PRKCQ    | -0.485672411 | 2.31E-27    |
| RP11-547C5.1 | NUAK2    | -0.625230611 | 5.45E-49    |
| RP11-547C5.1 | LIPG     | -0.204946284 | 1.51E-05    |
| RP11-547C5.1 | SLC25A25 | -0.439980366 | 3.29E-22    |
| RP11-547C5.1 | PRKX     | -0.385676866 | 5.10E-17    |
| RP11-547C5.1 | SRPX     | -0.150637391 | 0.00154931  |
| RP11-547C5.1 | FAM189A1 | -0.238710779 | 4.18E-07    |
| RP11-547C5.1 | PLEKHH1  | -0.362610098 | 4.35E-15    |
| RP11-547C5.1 | WNT11    | -0.396349474 | 5.77E-18    |
| RP11-547C5.1 | SNAI1    | -0.448805118 | 3.81E-23    |
| RP11-547C5.1 | FDCSP    | -0.10577913  | 0.026676377 |
| RP11-547C5.1 | MT1X     | -0.187353404 | 7.84E-05    |
| RP11-547C5.1 | ACACB    | -0.470142812 | 1.59E-25    |
| RP11-547C5.1 | ARC      | -0.06517649  | 0.172833552 |
| RP11-547C5.1 | KLK4     | -0.406995739 | 6.06E-19    |
| RP11-547C5.1 | ZFPM2    | -0.292927144 | 3.90E-10    |
| RP11-547C5.1 | AKAP12   | -0.311797387 | 2.36E-11    |
| RP11-547C5.1 | GJB6     | -0.396677351 | 5.39E-18    |
| RP11-547C5.1 | ERO1LB   | -0.471934612 | 9.89E-26    |
| RP11-547C5.1 | DNALI1   | -0.27441211  | 5.04E-09    |
| RP11-547C5.1 | HKDC1    | -0.424636532 | 1.20E-20    |
| RP11-547C5.1 | ZFP36L2  | -0.462043664 | 1.33E-24    |
| RP11-547C5.1 | CAPSL    | -0.271442764 | 7.47E-09    |
| RP11-547C5.1 | CYP7B1   | -0.459908717 | 2.31E-24    |
| RP11-547C5.1 | CPQ      | -0.290715563 | 5.35E-10    |
| RP11-547C5.1 | RPS6KA6  | -0.430159823 | 3.37E-21    |
| RP11-547C5.1 | TLE1     | -0.506472678 | 5.59E-30    |
| RP11-547C5.1 | TP53INP2 | -0.414178924 | 1.26E-19    |
| RP11-547C5.1 | KATNAL2  | -0.368994646 | 1.32E-15    |
| RP11-547C5.1 | SGPP2    | -0.516004301 | 3.07E-31    |
| RP11-547C5.1 | CTH      | -0.55208298  | 2.18E-36    |
| RP11-547C5.1 | KIF12    | -0.295132338 | 2.84E-10    |
| RP11-547C5.1 | TMEM220  | -0.372482029 | 6.78E-16    |
| RP11-547C5.1 | CENPJ    | -0.483780135 | 3.91E-27    |
| RP11-547C5.1 | FAM155B  | -0.082488522 | 0.084285924 |
| RP11-547C5.1 | WFS1     | -0.528177219 | 6.59E-33    |
| RP11-547C5.1 | SELENBP1 | -0.236027761 | 5.67E-07    |
| RP11-547C5.1 | SNTA1    | -0.351630531 | 3.19E-14    |
| RP11-547C5.1 | FRAS1    | -0.500563682 | 3.23E-29    |
| RP11-547C5.1 | FBLN7    | -0.467358468 | 3.33E-25    |
| RP11-547C5.1 | AGPAT9   | -0.345717561 | 9.05E-14    |
| RP11-547C5.1 | GPR83    | -0.350959989 | 3.60E-14    |
| RP11-547C5.1 | PRTG     | -0.405516663 | 8.32E-19    |
| RP11-547C5.1 | EGR3     | -0.094613615 | 0.047572256 |
| RP11-547C5.1 | GRAMD2   | -0.496607984 | 1.02E-28    |
| RP11-547C5.1 | HYOU1    | -0.48592005  | 2.15E-27    |
| RP11-547C5.1 | FBLN5    | -0.243585367 | 2.38E-07    |
| RP11-547C5.1 | ITM2A    | -0.257383904 | 4.50E-08    |

|              |          |              |             |
|--------------|----------|--------------|-------------|
| RP11-547C5.1 | SRF      | -0.370678024 | 9.56E-16    |
| RP11-547C5.1 | FGFR2    | -0.336873935 | 4.13E-13    |
| RP11-547C5.1 | MT1A     | -0.189393063 | 6.52E-05    |
| RP11-547C5.1 | MAMDC2   | -0.202786501 | 1.86E-05    |
| RP11-547C5.1 | FHL2     | -0.41393242  | 1.33E-19    |
| RP11-547C5.1 | FTCDNL1  | -0.468175323 | 2.69E-25    |
| RP11-547C5.1 | PKIA     | -0.146704967 | 0.002057968 |
| RP11-547C5.1 | DNAJB4   | -0.302997187 | 8.97E-11    |
| RP11-547C5.1 | SLC25A33 | -0.409112326 | 3.83E-19    |
| RP11-547C5.1 | EYA2     | -0.416103555 | 8.25E-20    |
| RP11-547C5.1 | LPAR1    | -0.459353693 | 2.67E-24    |
| RP11-547C5.1 | STX11    | -0.342236138 | 1.66E-13    |
| RP11-547C5.1 | ARHGEF28 | -0.425604099 | 9.65E-21    |
| RP11-547C5.1 | OR2W3    | -0.454440788 | 9.32E-24    |
| RP11-547C5.1 | ALDH1B1  | -0.453966175 | 1.05E-23    |
| RP11-547C5.1 | CXCL12   | -0.176971577 | 0.000193887 |
| RP11-547C5.1 | OLFM2    | -0.317853973 | 9.21E-12    |
| RP11-547C5.1 | TUB      | -0.379983011 | 1.58E-16    |
| RP11-547C5.1 | HTRA3    | -0.283233172 | 1.53E-09    |
| RP11-547C5.1 | CKB      | -0.341698002 | 1.82E-13    |
| RP11-547C5.1 | RGS2     | -0.24407582  | 2.24E-07    |
| RP11-547C5.1 | SHANK2   | -0.415112005 | 1.03E-19    |
| RP11-547C5.1 | CNTFR    | -0.244685307 | 2.09E-07    |
| RP11-547C5.1 | CYTH3    | -0.428171315 | 5.34E-21    |
| RP11-547C5.1 | PLAC9    | -0.079694245 | 0.095380764 |
| RP11-547C5.1 | WWOX     | -0.328428944 | 1.68E-12    |
| RP11-547C5.1 | NPR3     | -0.281561572 | 1.92E-09    |
| RP11-547C5.1 | SDC2     | -0.268817878 | 1.05E-08    |
| RP11-547C5.1 | KLF15    | -0.317786848 | 9.30E-12    |
| RP11-547C5.1 | TMEM164  | -0.540122081 | 1.30E-34    |
| RP11-547C5.1 | LONRF3   | -0.220424935 | 3.12E-06    |
| RP11-547C5.1 | GBP1     | -0.233516601 | 7.52E-07    |
| RP11-547C5.1 | ARHGAP6  | -0.44663824  | 6.51E-23    |
| RP11-547C5.1 | TMEM119  | -0.209476306 | 9.61E-06    |
| RP11-547C5.1 | SH3RF1   | -0.450633532 | 2.42E-23    |
| RP11-547C5.1 | CRELD2   | -0.305254605 | 6.40E-11    |
| RP11-547C5.1 | PCP4     | -0.179479331 | 0.000156495 |
| RP11-547C5.1 | GCSH     | -0.285877305 | 1.06E-09    |
| RP11-547C5.1 | IMPA2    | -0.409458454 | 3.55E-19    |
| RP11-547C5.1 | C1R      | -0.205006313 | 1.50E-05    |
| RP11-547C5.1 | SUCNR1   | -0.227524018 | 1.46E-06    |
| RP11-547C5.1 | SFRP1    | -0.267062408 | 1.32E-08    |
| RP11-547C5.1 | UGT8     | -0.44879788  | 3.82E-23    |
| RP11-547C5.1 | TLE4     | -0.298738077 | 1.68E-10    |
| RP11-547C5.1 | ANTXR1   | -0.362763222 | 4.23E-15    |
| RP11-547C5.1 | GPX3     | -0.391212488 | 1.66E-17    |
| RP11-547C5.1 | DPY19L2  | -0.36451699  | 3.05E-15    |
| RP11-547C5.1 | FAM46C   | -0.443117223 | 1.54E-22    |
| RP11-547C5.1 | IL33     | -0.211063332 | 8.20E-06    |
| RP11-547C5.1 | PEG3     | -0.395437822 | 6.97E-18    |
| RP11-547C5.1 | FAHD2A   | -0.365988917 | 2.32E-15    |

|              |          |              |             |
|--------------|----------|--------------|-------------|
| RP11-547C5.1 | PTGDS    | -0.019800912 | 0.679069733 |
| RP11-547C5.1 | CHCHD10  | -0.290192044 | 5.77E-10    |
| RP11-547C5.1 | CD36     | -0.272334921 | 6.64E-09    |
| RP11-547C5.1 | ANKRD37  | -0.304133488 | 7.57E-11    |
| RP11-547C5.1 | TSPAN33  | -0.401853165 | 1.82E-18    |
| RP11-547C5.1 | PRDM16   | -0.456058745 | 6.19E-24    |
| RP11-547C5.1 | UST      | -0.196849974 | 3.28E-05    |
| RP11-547C5.1 | NEXN     | -0.353504357 | 2.29E-14    |
| RP11-547C5.1 | NUPR1L   | -0.105776856 | 0.026679657 |
| RP11-547C5.1 | SLC24A3  | -0.513150562 | 7.39E-31    |
| RP11-547C5.1 | MARC1    | -0.216151919 | 4.87E-06    |
| RP11-547C5.1 | MYH11    | -0.215466618 | 5.23E-06    |
| RP11-547C5.1 | APOA1    | -0.350571655 | 3.86E-14    |
| RP11-547C5.1 | TMEM178B | -0.362094384 | 4.78E-15    |
| RP11-547C5.1 | CAPN6    | -0.227226161 | 1.51E-06    |
| RP11-547C5.1 | PPM1L    | -0.376574958 | 3.08E-16    |
| RP11-547C5.1 | FZD8     | -0.444319657 | 1.15E-22    |
| RP11-547C5.1 | RCAN2    | -0.322101729 | 4.69E-12    |
| RP11-547C5.1 | COPZ2    | -0.384485076 | 6.47E-17    |
| RP11-547C5.1 | GAS1     | -0.305548366 | 6.12E-11    |
| RP11-547C5.1 | DACT1    | -0.467867938 | 2.91E-25    |
| RP11-547C5.1 | WBSCR17  | -0.276434945 | 3.85E-09    |
| RP11-547C5.1 | NCS1     | -0.401001116 | 2.18E-18    |
| RP11-547C5.1 | SPIRE2   | -0.527155725 | 9.15E-33    |
| RP11-547C5.1 | C15orf52 | -0.422173055 | 2.11E-20    |
| RP11-547C5.1 | SPAG5    | -0.541032031 | 9.60E-35    |
| RP11-547C5.1 | ARL4D    | -0.347973703 | 6.10E-14    |
| RP11-547C5.1 | FAM189A2 | -0.195363288 | 3.77E-05    |
| RP11-547C5.1 | MAP1LC3A | -0.249473643 | 1.18E-07    |
| RP11-547C5.1 | KLF6     | -0.12731163  | 0.007568305 |
| RP11-547C5.1 | ADD3     | -0.262619946 | 2.34E-08    |
| RP11-547C5.1 | TSPAN7   | -0.176447916 | 0.000202684 |
| RP11-547C5.1 | KLF9     | -0.226645006 | 1.60E-06    |
| RP11-547C5.1 | KCNQ1    | -0.267194387 | 1.30E-08    |
| RP11-547C5.1 | MAN1A1   | -0.328938414 | 1.55E-12    |
| RP11-547C5.1 | MLF1     | -0.250222095 | 1.08E-07    |
| RP11-547C5.1 | RARB     | -0.39523971  | 7.26E-18    |
| RP11-547C5.1 | CDC42EP2 | -0.257693276 | 4.33E-08    |
| RP11-547C5.1 | FAM3B    | -0.296096499 | 2.47E-10    |
| RP11-547C5.1 | GADD45B  | -0.209932416 | 9.18E-06    |
| RP11-547C5.1 | TMEM47   | -0.215170445 | 5.39E-06    |
| RP11-547C5.1 | SDF2L1   | -0.180240839 | 0.000146554 |
| RP11-547C5.1 | CCDC85A  | -0.41582356  | 8.78E-20    |
| RP11-547C5.1 | CRYBG3   | -0.420323922 | 3.21E-20    |
| RP11-547C5.1 | FBLN2    | -0.17099503  | 0.000319357 |
| RP11-547C5.1 | PEBP4    | -0.037754962 | 0.430065087 |
| RP11-547C5.1 | CDADC1   | -0.286361656 | 9.88E-10    |
| RP11-547C5.1 | FAM63A   | -0.433958691 | 1.38E-21    |
| RP11-547C5.1 | GLUL     | -0.400869846 | 2.24E-18    |
| RP11-547C5.1 | FREM2    | -0.426741252 | 7.43E-21    |
| RP11-547C5.1 | ACKR3    | -0.362965875 | 4.07E-15    |

|              |          |              |             |
|--------------|----------|--------------|-------------|
| RP11-547C5.1 | DENND6A  | -0.490875529 | 5.31E-28    |
| RP11-547C5.1 | CLDN8    | -0.348226735 | 5.83E-14    |
| RP11-547C5.1 | UTS2R    | -0.297455642 | 2.03E-10    |
| RP11-547C5.1 | SCNN1B   | -0.298679893 | 1.70E-10    |
| RP11-547C5.1 | TTC30A   | -0.523169658 | 3.26E-32    |
| RP11-547C5.1 | CORO2B   | -0.23865004  | 4.21E-07    |
| RP11-547C5.1 | TC2N     | -0.541495946 | 8.21E-35    |
| RP11-547C5.1 | ALDH2    | -0.355191709 | 1.69E-14    |
| RP11-547C5.1 | GPR183   | -0.172683517 | 0.000277819 |
| RP11-547C5.1 | C4orf47  | -0.233379655 | 7.64E-07    |
| RP11-547C5.1 | SLC25A42 | -0.268151736 | 1.15E-08    |
| RP11-547C5.1 | LGMN     | -0.436608642 | 7.37E-22    |
| RP11-547C5.1 | ACSF2    | -0.39996458  | 2.71E-18    |
| RP11-547C5.1 | KIAA1467 | -0.452500688 | 1.52E-23    |
| RP11-547C5.1 | PRKG1    | -0.281848805 | 1.85E-09    |
| RP11-547C5.1 | GNAI1    | -0.415995417 | 8.45E-20    |
| RP11-547C5.1 | ABCC4    | -0.420072309 | 3.39E-20    |
| RP11-547C5.1 | PRPS1    | -0.500956499 | 2.87E-29    |
| RP11-547C5.1 | TSPAN5   | -0.563260516 | 4.10E-38    |
| RP11-547C5.1 | CR2      | -0.175514292 | 0.000219303 |
| RP11-547C5.1 | CCDC170  | -0.517745296 | 1.79E-31    |
| RP11-547C5.1 | RRAD     | -0.098220632 | 0.039680497 |
| RP11-547C5.1 | SCGB2A1  | -0.373125891 | 5.99E-16    |
| RP11-547C5.1 | SESN3    | -0.341085361 | 2.02E-13    |
| RP11-547C5.1 | SGK223   | -0.403262934 | 1.35E-18    |
| RP11-547C5.1 | NDRG2    | -0.34800095  | 6.07E-14    |
| RP11-547C5.1 | C3orf52  | -0.369957529 | 1.10E-15    |
| RP11-547C5.1 | FLRT3    | 0.301610975  | 1.10E-10    |
| RP11-547C5.1 | MST1R    | 0.376230959  | 3.29E-16    |
| RP11-547C5.1 | SDC1     | 0.15903924   | 0.00082565  |
| RP11-547C5.1 | ST8SIA4  | 0.165722233  | 0.000489378 |
| RP11-547C5.1 | UBTD1    | 0.502704164  | 1.72E-29    |
| RP11-547C5.1 | EPHA2    | 0.340816293  | 2.11E-13    |
| RP11-547C5.1 | TMEM130  | 0.514632281  | 4.69E-31    |
| RP11-547C5.1 | SPINK2   | 0.462985403  | 1.05E-24    |
| RP11-547C5.1 | MMP16    | 0.208442891  | 1.07E-05    |
| RP11-547C5.1 | SIGLEC15 | 0.572529174  | 1.35E-39    |
| RP11-547C5.1 | RIN1     | 0.554586193  | 9.08E-37    |
| RP11-547C5.1 | IL1RN    | 0.215959484  | 4.97E-06    |
| RP11-547C5.1 | FCER1G   | 0.230768304  | 1.02E-06    |
| RP11-547C5.1 | CD276    | 0.385170945  | 5.64E-17    |
| RP11-547C5.1 | CTSB     | 0.370529725  | 9.84E-16    |
| RP11-547C5.1 | FAM171A2 | 0.489971823  | 6.87E-28    |
| RP11-547C5.1 | ASPHD1   | 0.317009162  | 1.05E-11    |
| RP11-547C5.1 | C15orf48 | 0.116406852  | 0.014673362 |
| RP11-547C5.1 | DYSF     | 0.345413866  | 9.55E-14    |
| RP11-547C5.1 | PDZRN4   | 0.474985895  | 4.35E-26    |
| RP11-547C5.1 | EFHD2    | 0.465506922  | 5.42E-25    |
| RP11-547C5.1 | ASF1B    | 0.23966018   | 3.75E-07    |
| RP11-547C5.1 | AQP1     | 0.420121269  | 3.36E-20    |
| RP11-547C5.1 | ARRDC2   | 0.471341697  | 1.16E-25    |

|              |          |             |             |
|--------------|----------|-------------|-------------|
| RP11-547C5.1 | PRSS1    | 0.57286787  | 1.19E-39    |
| RP11-547C5.1 | MAPK13   | 0.387324766 | 3.66E-17    |
| RP11-547C5.1 | CST5     | 0.263098332 | 2.20E-08    |
| RP11-547C5.1 | AHR      | 0.26094636  | 2.89E-08    |
| RP11-547C5.1 | BAX      | 0.328592996 | 1.64E-12    |
| RP11-547C5.1 | C1orf115 | 0.53042073  | 3.19E-33    |
| RP11-547C5.1 | PLK3     | 0.492011688 | 3.84E-28    |
| RP11-547C5.1 | JAG2     | 0.406849231 | 6.25E-19    |
| RP11-547C5.1 | RAD23B   | 0.482151819 | 6.14E-27    |
| RP11-547C5.1 | CA12     | 0.175944549 | 0.000211492 |
| RP11-547C5.1 | ADTRP    | 0.429383682 | 4.03E-21    |
| RP11-547C5.1 | UCP2     | 0.351773296 | 3.11E-14    |
| RP11-547C5.1 | IGFBP2   | 0.365910155 | 2.35E-15    |
| RP11-547C5.1 | LOXL2    | 0.197790009 | 3.00E-05    |
| RP11-547C5.1 | GPX1     | 0.459100945 | 2.85E-24    |
| RP11-547C5.1 | P3H3     | 0.456781084 | 5.15E-24    |
| RP11-547C5.1 | C2orf81  | 0.537696211 | 2.93E-34    |
| RP11-547C5.1 | CDT1     | 0.30970842  | 3.26E-11    |
| RP11-547C5.1 | SNX25    | 0.399266081 | 3.14E-18    |
| RP11-547C5.1 | MTHFD1L  | 0.282590445 | 1.67E-09    |
| RP11-547C5.1 | CDC42BPG | 0.319182508 | 7.46E-12    |
| RP11-547C5.1 | MSN      | 0.423148143 | 1.69E-20    |
| RP11-547C5.1 | SIGLEC6  | 0.30291359  | 9.08E-11    |
| RP11-547C5.1 | F2R      | 0.060400389 | 0.2065626   |
| RP11-547C5.1 | TMEM184A | 0.361121425 | 5.73E-15    |
| RP11-547C5.1 | CKS2     | 0.133968794 | 0.004928969 |
| RP11-547C5.1 | TAX1BP3  | 0.452563556 | 1.49E-23    |
| RP11-547C5.1 | PMEPA1   | 0.393541715 | 1.03E-17    |
| RP11-547C5.1 | CXCL16   | 0.225805871 | 1.76E-06    |
| RP11-547C5.1 | FAXC     | 0.372167833 | 7.20E-16    |
| RP11-547C5.1 | VTCN1    | 0.182441101 | 0.000121057 |
| RP11-547C5.1 | SH2D4A   | 0.34419937  | 1.18E-13    |
| RP11-547C5.1 | RNF24    | 0.353325262 | 2.36E-14    |
| RP11-547C5.1 | LY6G6C   | 0.302372448 | 9.84E-11    |
| RP11-547C5.1 | NID1     | 0.12838847  | 0.007070121 |
| RP11-547C5.1 | STAC     | 0.281910537 | 1.83E-09    |
| RP11-547C5.1 | RAB34    | 0.599191464 | 3.95E-44    |
| RP11-547C5.1 | HES4     | 0.374976585 | 4.19E-16    |
| RP11-547C5.1 | EPHA10   | 0.354430769 | 1.93E-14    |
| RP11-547C5.1 | ENTPD2   | 0.591353437 | 9.40E-43    |
| RP11-547C5.1 | DDB2     | 0.372147681 | 7.22E-16    |
| RP11-547C5.1 | NKAIN4   | 0.388845654 | 2.69E-17    |
| RP11-547C5.1 | TRIM29   | 0.268852363 | 1.05E-08    |
| RP11-547C5.1 | ADCY8    | 0.460544106 | 1.97E-24    |
| RP11-547C5.1 | SFTA2    | 0.184001264 | 0.000105571 |
| RP11-547C5.1 | NRIP1    | 0.249425677 | 1.19E-07    |
| RP11-547C5.1 | VWA1     | 0.381908352 | 1.08E-16    |
| RP11-547C5.1 | APLNR    | 0.270373392 | 8.59E-09    |
| RP11-547C5.1 | REN      | 0.519955827 | 8.97E-32    |
| RP11-547C5.1 | EDIL3    | 0.260436606 | 3.08E-08    |
| RP11-547C5.1 | AGRN     | 0.355009634 | 1.74E-14    |



|              |          |             |             |
|--------------|----------|-------------|-------------|
| RP11-547C5.1 | TREM1    | 0.385044216 | 5.79E-17    |
| RP11-547C5.1 | SRL      | 0.329663308 | 1.37E-12    |
| RP11-547C5.1 | RASGRF1  | 0.510873701 | 1.48E-30    |
| RP11-547C5.1 | RMI2     | 0.3351819   | 5.49E-13    |
| RP11-547C5.1 | SAMD1    | 0.448859754 | 3.76E-23    |
| RP11-547C5.1 | MGAT4B   | 0.476914358 | 2.58E-26    |
| RP11-547C5.1 | NXN      | 0.295955011 | 2.52E-10    |
| RP11-547C5.1 | SH3BGRL3 | 0.400699692 | 2.32E-18    |
| RP11-547C5.1 | CA11     | 0.586858751 | 5.57E-42    |
| RP11-547C5.1 | PLD3     | 0.531979934 | 1.92E-33    |
| RP11-547C5.1 | LURAP1L  | 0.275360944 | 4.44E-09    |
| RP11-547C5.1 | CARNS1   | 0.429446266 | 3.97E-21    |
| RP11-547C5.1 | PDLIM7   | 0.537745455 | 2.88E-34    |
| RP11-547C5.1 | BCL2L1   | 0.29950143  | 1.50E-10    |
| RP11-547C5.1 | GGT6     | 0.370558959 | 9.78E-16    |
| RP11-547C5.1 | DPYSL3   | 0.198735012 | 2.74E-05    |
| RP11-547C5.1 | FYN      | 0.398935139 | 3.36E-18    |
| RP11-547C5.1 | TK1      | 0.220776739 | 3.01E-06    |
| RP11-547C5.1 | AK1      | 0.54461549  | 2.86E-35    |
| RP11-547C5.1 | HIGD1B   | 0.487736117 | 1.29E-27    |
| RP11-547C5.1 | TMEM59L  | 0.296130274 | 2.46E-10    |
| RP11-547C5.1 | MEGF9    | 0.311255845 | 2.57E-11    |
| RP11-547C5.1 | ZFP36L1  | 0.272134539 | 6.82E-09    |
| RP11-547C5.1 | ADRA1B   | 0.472729044 | 7.99E-26    |
| RP11-547C5.1 | EPHA4    | 0.311875298 | 2.34E-11    |
| RP11-547C5.1 | TCERG1L  | 0.259866682 | 3.30E-08    |
| RP11-547C5.1 | NGFR     | 0.497316558 | 8.33E-29    |
| RP11-547C5.1 | EBI3     | 0.250634638 | 1.03E-07    |
| RP11-547C5.1 | S100A10  | 0.231533785 | 9.38E-07    |
| RP11-547C5.1 | S100B    | 0.299948316 | 1.41E-10    |
| RP11-547C5.1 | CD44     | 0.477257363 | 2.35E-26    |
| RP11-547C5.1 | BHLHE41  | 0.431610306 | 2.40E-21    |
| RP11-547C5.1 | FBX02    | 0.58020031  | 7.40E-41    |
| RP11-547C5.1 | SLC30A2  | 0.000253741 | 0.995770182 |
| RP11-547C5.1 | FRMD5    | 0.336525254 | 4.38E-13    |
| RP11-547C5.1 | SAMD11   | 0.259603858 | 3.42E-08    |
| RP11-547C5.1 | SIPA1L2  | 0.425475525 | 9.94E-21    |
| RP11-547C5.1 | S100A16  | 0.343046465 | 1.44E-13    |
| RP11-547C5.1 | PPL      | 0.240460431 | 3.42E-07    |
| RP11-547C5.1 | ARHGDIB  | 0.363947065 | 3.39E-15    |
| RP11-547C5.1 | CDC42EP3 | 0.223497789 | 2.25E-06    |
| RP11-547C5.1 | RUNX2    | 0.494988325 | 1.64E-28    |
| RP11-547C5.1 | LAMC2    | 0.208092365 | 1.10E-05    |
| RP11-547C5.1 | BRINP1   | 0.513072651 | 7.57E-31    |
| RP11-547C5.1 | GPRC5B   | 0.403123291 | 1.39E-18    |
| RP11-547C5.1 | AQP5     | 0.394889468 | 7.81E-18    |
| RP11-547C5.1 | PLAG1    | 0.512352156 | 9.43E-31    |
| RP11-547C5.1 | PTPRU    | 0.220947177 | 2.95E-06    |
| RP11-547C5.1 | ANGPTL4  | 0.352979987 | 2.51E-14    |
| RP11-547C5.1 | PALM3    | 0.457566008 | 4.22E-24    |
| RP11-547C5.1 | ACP5     | 0.203464422 | 1.74E-05    |

|              |          |             |             |
|--------------|----------|-------------|-------------|
| RP11-547C5.1 | DLG4     | 0.534865178 | 7.47E-34    |
| RP11-547C5.1 | ETNK2    | 0.511471724 | 1.23E-30    |
| RP11-547C5.1 | CD109    | 0.328920391 | 1.55E-12    |
| RP11-547C5.1 | SNX22    | 0.483329986 | 4.43E-27    |
| RP11-547C5.1 | TMEM98   | 0.404610545 | 1.01E-18    |
| RP11-547C5.1 | CTHRC1   | 0.158015618 | 0.000892944 |
| RP11-547C5.1 | S100A2   | 0.268410444 | 1.11E-08    |
| RP11-547C5.1 | C11orf80 | 0.444878654 | 1.00E-22    |
| RP11-547C5.1 | SREBF1   | 0.353501803 | 2.29E-14    |
| RP11-547C5.1 | PRSS22   | 0.333178649 | 7.68E-13    |
| RP11-547C5.1 | CMTM3    | 0.352715886 | 2.63E-14    |
| RP11-547C5.1 | RDH5     | 0.593705796 | 3.66E-43    |
| RP11-547C5.1 | MYH10    | 0.428840863 | 4.57E-21    |
| RP11-547C5.1 | EVPL     | 0.323024593 | 4.04E-12    |
| RP11-547C5.1 | SCD      | 0.229130905 | 1.22E-06    |
| RP11-547C5.1 | CD151    | 0.565315566 | 1.94E-38    |
| RP11-547C5.1 | S100A4   | 0.433207259 | 1.65E-21    |
| RP11-547C5.1 | BNIP1    | 0.514952722 | 4.25E-31    |
| RP11-547C5.1 | MAP3K6   | 0.427748838 | 5.89E-21    |
| RP11-547C5.1 | MANEAL   | 0.353242953 | 2.39E-14    |
| RP11-547C5.1 | CD207    | 0.392097029 | 1.39E-17    |
| RP11-547C5.1 | CD1A     | 0.366707398 | 2.03E-15    |
| RP11-547C5.1 | C3       | 0.21152355  | 7.82E-06    |
| RP11-547C5.1 | NT5E     | 0.293458752 | 3.62E-10    |
| RP11-547C5.1 | CACNG4   | 0.209763262 | 9.34E-06    |
| RP11-547C5.1 | FHOD1    | 0.388513576 | 2.88E-17    |
| RP11-547C5.1 | LEMD1    | 0.493301824 | 2.66E-28    |
| RP11-547C5.1 | ATP11A   | 0.246334658 | 1.72E-07    |
| RP11-547C5.1 | PPAP2C   | 0.374122975 | 4.94E-16    |
| RP11-547C5.1 | DRAM1    | 0.230939167 | 1.00E-06    |
| RP11-547C5.1 | CDA      | 0.367948885 | 1.60E-15    |
| RP11-547C5.1 | CCND2    | 0.536135446 | 4.91E-34    |
| RP11-547C5.1 | LCN6     | 0.451977682 | 1.73E-23    |
| RP11-547C5.1 | CDH4     | 0.262317812 | 2.43E-08    |
| RP11-547C5.1 | MMP11    | 0.29921661  | 1.57E-10    |
| RP11-547C5.1 | B3GAT1   | 0.307665149 | 4.45E-11    |
| RP11-547C5.1 | SPP1     | 0.104724529 | 0.028235222 |
| RP11-547C5.1 | HLA-DQB1 | 0.229435452 | 1.18E-06    |
| RP11-547C5.1 | SDC3     | 0.452377365 | 1.57E-23    |
| RP11-547C5.1 | CX3CL1   | 0.280272571 | 2.29E-09    |
| RP11-547C5.1 | SDK1     | 0.319192218 | 7.45E-12    |
| RP11-547C5.1 | DOCK9    | 0.352654153 | 2.66E-14    |
| RP11-547C5.1 | CSF2     | 0.467008239 | 3.65E-25    |
| RP11-547C5.1 | GRHL3    | 0.388163759 | 3.09E-17    |
| RP11-547C5.1 | TMEM92   | 0.431529839 | 2.44E-21    |
| RP11-547C5.1 | BASP1    | 0.377720626 | 2.46E-16    |
| RP11-547C5.1 | HRH1     | 0.29697764  | 2.18E-10    |
| RP11-547C5.1 | ESM1     | 0.095928444 | 0.044555338 |
| RP11-547C5.1 | B4GALNT3 | 0.376047323 | 3.41E-16    |
| RP11-547C5.1 | LMO3     | 0.413966621 | 1.32E-19    |
| RP11-547C5.1 | C9orf16  | 0.441860437 | 2.09E-22    |

|              |          |             |             |
|--------------|----------|-------------|-------------|
| RP11-547C5.1 | SEMA3F   | 0.531691282 | 2.11E-33    |
| RP11-547C5.1 | PLA2G12B | 0.525253257 | 1.68E-32    |
| RP11-547C5.1 | KLK6     | 0.389651538 | 2.29E-17    |
| RP11-547C5.1 | ST3GAL5  | 0.652684353 | 1.23E-54    |
| RP11-547C5.1 | FAM132B  | 0.377827061 | 2.41E-16    |
| RP11-547C5.1 | CDKN1A   | 0.142470551 | 0.002772884 |
| RP11-547C5.1 | E2F1     | 0.33118746  | 1.07E-12    |
| RP11-547C5.1 | B3GNT8   | 0.474280585 | 5.27E-26    |
| RP11-547C5.1 | MTMR11   | 0.370911046 | 9.15E-16    |
| RP11-547C5.1 | MYO1G    | 0.177456637 | 0.000186058 |
| RP11-547C5.1 | TMSB10   | 0.444440851 | 1.12E-22    |
| RP11-547C5.1 | UNC5CL   | 0.410556297 | 2.80E-19    |
| RP11-547C5.1 | ABR      | 0.302013016 | 1.04E-10    |
| RP11-547C5.1 | PLP2     | 0.451174932 | 2.12E-23    |
| RP11-547C5.1 | SRCIN1   | 0.427205309 | 6.68E-21    |
| RP11-547C5.1 | PDE9A    | 0.421097776 | 2.69E-20    |
| RP11-547C5.1 | TREM2    | 0.247839651 | 1.44E-07    |
| RP11-547C5.1 | KDELR3   | 0.335839386 | 4.92E-13    |
| RP11-547C5.1 | PC       | 0.48310335  | 4.72E-27    |
| RP11-547C5.1 | C2CD4A   | 0.299450199 | 1.52E-10    |
| RP11-547C5.1 | PELI1    | 0.244478429 | 2.14E-07    |
| RP11-547C5.1 | SSX1     | 0.334138836 | 6.54E-13    |
| RP11-547C5.1 | MROH6    | 0.519595849 | 1.00E-31    |
| RP11-547C5.1 | ESPN     | 0.580561196 | 6.44E-41    |
| RP11-547C5.1 | BMP1     | 0.53214725  | 1.82E-33    |
| RP11-547C5.1 | TM4SF4   | 0.49923232  | 4.77E-29    |
| RP11-547C5.1 | CORO2A   | 0.390137493 | 2.07E-17    |
| RP11-547C5.1 | CD164L2  | 0.514000784 | 5.69E-31    |
| RP11-547C5.1 | CTSS     | 0.143757564 | 0.002534729 |
| RP11-547C5.1 | CLU      | 0.562578338 | 5.25E-38    |
| RP11-547C5.1 | TMSB4X   | 0.441096658 | 2.51E-22    |
| RP11-547C5.1 | WNT10A   | 0.358877855 | 8.64E-15    |
| RP11-547C5.1 | NAPSA    | 0.31436219  | 1.59E-11    |
| RP11-547C5.1 | PLEKHA4  | 0.548164322 | 8.48E-36    |
| RP11-547C5.1 | SFTPA1   | 0.238578555 | 4.24E-07    |
| RP11-547C5.1 | C1orf116 | 0.373243112 | 5.85E-16    |
| RP11-547C5.1 | TM4SF1   | 0.331779665 | 9.69E-13    |
| RP11-547C5.1 | SEL1L3   | 0.15192256  | 0.00140995  |
| RP11-547C5.1 | VASN     | 0.505480702 | 7.52E-30    |
| RP11-547C5.1 | NPTXR    | 0.430456549 | 3.14E-21    |
| RP11-547C5.1 | PDE4C    | 0.357092925 | 1.20E-14    |
| RP11-547C5.1 | CDC42EP1 | 0.448176583 | 4.46E-23    |
| RP11-547C5.1 | ENDOD1   | 0.422112174 | 2.14E-20    |
| RP11-547C5.1 | RYR1     | 0.498227501 | 6.39E-29    |
| RP11-547C5.1 | IL1RAP   | 0.430667006 | 2.99E-21    |
| RP11-547C5.1 | SLC35F2  | 0.434426524 | 1.24E-21    |
| RP11-547C5.1 | ISYNA1   | 0.607805616 | 1.09E-45    |
| RP11-547C5.1 | HLA-G    | 0.177486581 | 0.000185584 |
| RP11-547C5.1 | CDKN2B   | 0.286131898 | 1.02E-09    |
| RP11-547C5.1 | ALDH1A3  | 0.225682974 | 1.78E-06    |
| RP11-547C5.1 | CLIP3    | 0.380420389 | 1.45E-16    |

|              |          |             |             |
|--------------|----------|-------------|-------------|
| RP11-547C5.1 | ULBP2    | 0.424348306 | 1.29E-20    |
| RP11-547C5.1 | ETHE1    | 0.360500269 | 6.42E-15    |
| RP11-547C5.1 | XPR1     | 0.268077657 | 1.16E-08    |
| RP11-547C5.1 | SPTBN2   | 0.353402747 | 2.33E-14    |
| RP11-547C5.1 | IVL      | 0.398391253 | 3.77E-18    |
| RP11-547C5.1 | MARCO    | 0.21627368  | 4.81E-06    |
| RP11-547C5.1 | PLXND1   | 0.411916822 | 2.08E-19    |
| RP11-547C5.1 | EMILIN2  | 0.450830792 | 2.31E-23    |
| RP11-547C5.1 | PLAUR    | 0.232046803 | 8.86E-07    |
| RP11-547C5.1 | CDC42EP5 | 0.478626403 | 1.62E-26    |
| RP11-547C5.1 | TRPC5    | 0.57185444  | 1.74E-39    |
| RP11-547C5.1 | TMEM100  | 0.451161166 | 2.12E-23    |
| RP11-547C5.1 | QSOX1    | 0.368612615 | 1.41E-15    |
| RP11-547C5.1 | ARHGAP23 | 0.417893369 | 5.53E-20    |
| RP11-547C5.1 | MDFI     | 0.30649124  | 5.31E-11    |
| RP11-547C5.1 | FSTL3    | 0.339607048 | 2.60E-13    |
| RP11-547C5.1 | INF2     | 0.556049889 | 5.42E-37    |
| RP11-547C5.1 | TGFBR1   | 0.460997478 | 1.75E-24    |
| RP11-547C5.1 | TGFBI    | 0.272267087 | 6.70E-09    |
| RP11-547C5.1 | ERBB3    | 0.288137278 | 7.71E-10    |
| RP11-547C5.1 | CCL18    | 0.220472476 | 3.10E-06    |
| RP11-547C5.1 | CCL17    | 0.308317181 | 4.03E-11    |
| RP11-547C5.1 | C16orf45 | 0.438796949 | 4.37E-22    |
| RP11-547C5.1 | PRDM1    | 0.378979683 | 1.92E-16    |
| RP11-547C5.1 | TRIM47   | 0.367586864 | 1.72E-15    |
| RP11-547C5.1 | CNFN     | 0.35165565  | 3.18E-14    |
| RP11-547C5.1 | ARMCX3   | 0.520199975 | 8.31E-32    |
| RP11-547C5.1 | RAMP1    | 0.516646034 | 2.52E-31    |
| RP11-547C5.1 | GABRD    | 0.358924177 | 8.57E-15    |
| RP11-547C5.1 | COL13A1  | 0.430189893 | 3.34E-21    |
| RP11-547C5.1 | S100A5   | 0.499254104 | 4.74E-29    |
| RP11-547C5.1 | MISP     | 0.174265712 | 0.000243526 |
| RP11-547C5.1 | HES6     | 0.497841922 | 7.15E-29    |
| RP11-547C5.1 | PSD3     | 0.446147077 | 7.35E-23    |
| RP11-547C5.1 | DOK7     | 0.391942917 | 1.43E-17    |
| RP11-547C5.1 | ZMAT3    | 0.294011079 | 3.34E-10    |
| RP11-547C5.1 | MFAP2    | 0.379444449 | 1.76E-16    |
| RP11-547C5.1 | TMEM79   | 0.478131693 | 1.85E-26    |
| RP11-547C5.1 | SLC1A5   | 0.272495709 | 6.50E-09    |
| RP11-547C5.1 | BBC3     | 0.342832175 | 1.49E-13    |
| RP11-547C5.1 | HLA-DQB2 | 0.24431168  | 2.18E-07    |
| RP11-547C5.1 | C1QL1    | 0.546895615 | 1.31E-35    |
| RP11-547C5.1 | TMEM215  | 0.482290166 | 5.91E-27    |
| RP11-547C5.1 | PNP      | 0.26113028  | 2.82E-08    |
| RP11-547C5.1 | ARNTL    | 0.39523744  | 7.27E-18    |
| RP11-547C5.1 | CLDN2    | 0.536859295 | 3.86E-34    |
| RP11-547C5.1 | MVP      | 0.437346167 | 6.19E-22    |
| RP11-547C5.1 | LGALS1   | 0.465820835 | 4.99E-25    |
| RP11-547C5.1 | BIRC7    | 0.497951549 | 6.93E-29    |
| RP11-547C5.1 | COL8A1   | 0.432166465 | 2.11E-21    |
| RP11-547C5.1 | PERP     | 0.28121658  | 2.01E-09    |

|              |           |             |             |
|--------------|-----------|-------------|-------------|
| RP11-547C5.1 | GJA4      | 0.394906071 | 7.78E-18    |
| RP11-547C5.1 | IGFL2     | 0.380048645 | 1.56E-16    |
| RP11-547C5.1 | DAPK2     | 0.431822892 | 2.28E-21    |
| RP11-547C5.1 | MAMLD1    | 0.447629222 | 5.10E-23    |
| RP11-547C5.1 | ETV5      | 0.498521404 | 5.87E-29    |
| RP11-547C5.1 | RUNX1     | 0.263312768 | 2.14E-08    |
| RP11-547C5.1 | LONRF2    | 0.372695325 | 6.50E-16    |
| RP11-547C5.1 | SPOCK1    | 0.376291414 | 3.25E-16    |
| RP11-547C5.1 | XKRX      | 0.391159838 | 1.68E-17    |
| RP11-547C5.1 | TGFB1     | 0.343097695 | 1.43E-13    |
| RP11-547C5.1 | ERP27     | 0.232454378 | 8.47E-07    |
| RP11-547C5.1 | TNFRSF10C | 0.297862187 | 1.91E-10    |
| RP11-547C5.1 | PALM      | 0.474822837 | 4.55E-26    |
| RP11-547C5.1 | TSC22D1   | 0.628989475 | 9.92E-50    |
| RP11-547C5.1 | TGM2      | 0.21978604  | 3.34E-06    |
| RP11-547C5.1 | UBE2QL1   | 0.522866388 | 3.59E-32    |
| RP11-547C5.1 | ECE1      | 0.459008701 | 2.92E-24    |
| RP11-547C5.1 | COL8A2    | 0.388119056 | 3.12E-17    |
| RP11-547C5.1 | HIST3H2A  | 0.319985656 | 6.57E-12    |
| RP11-547C5.1 | TNFRSF21  | 0.265214126 | 1.68E-08    |
| RP11-547C5.1 | SOX4      | 0.245143152 | 1.98E-07    |
| RP11-547C5.1 | ELF3      | 0.257578042 | 4.40E-08    |
| RP11-547C5.1 | TPD52L1   | 0.538709048 | 2.09E-34    |
| RP11-547C5.1 | INHBB     | 0.512314975 | 9.54E-31    |
| RP11-547C5.1 | HPN       | 0.474317057 | 5.22E-26    |
| RP11-547C5.1 | MMP7      | 0.228068709 | 1.37E-06    |
| RP11-547C5.1 | RAB27A    | 0.516246831 | 2.85E-31    |
| RP11-547C5.1 | IGF2BP2   | 0.45456624  | 9.03E-24    |
| RP11-547C5.1 | ITGB4     | 0.342048529 | 1.71E-13    |
| RP11-547C5.1 | PPP1R1B   | 0.485657652 | 2.32E-27    |
| RP11-547C5.1 | NPDC1     | 0.597167351 | 9.02E-44    |
| RP11-547C5.1 | CCL13     | 0.346721368 | 7.60E-14    |
| RP11-547C5.1 | SPINT1    | 0.410678626 | 2.72E-19    |
| RP11-547C5.1 | HEY2      | 0.616196395 | 2.98E-47    |
| RP11-547C5.1 | CST2      | 0.225265876 | 1.86E-06    |
| RP11-547C5.1 | ADM       | 0.494376961 | 1.95E-28    |
| RP11-547C5.1 | VSTM2L    | 0.275879638 | 4.15E-09    |
| RP11-547C5.1 | FAM84A    | 0.250123324 | 1.09E-07    |
| RP11-547C5.1 | P4HA2     | 0.47641312  | 2.96E-26    |
| RP11-547C5.1 | LPL       | 0.405077299 | 9.14E-19    |
| RP11-547C5.1 | TMEM173   | 0.439895076 | 3.36E-22    |
| RP11-547C5.1 | DHRS3     | 0.517372489 | 2.01E-31    |
| RP11-547C5.1 | SCN1B     | 0.546620444 | 1.44E-35    |
| RP11-547C5.1 | GLT1D1    | 0.541075031 | 9.46E-35    |
| RP11-547C5.1 | PHYHIP    | 0.534826861 | 7.56E-34    |
| RP11-547C5.1 | BHLHE40   | 0.275819466 | 4.18E-09    |
| RP11-547C5.1 | BID       | 0.514387196 | 5.05E-31    |
| RP11-547C5.1 | POSTN     | 0.087428249 | 0.067233763 |
| RP11-547C5.1 | ITGA3     | 0.342093373 | 1.70E-13    |
| RP11-547C5.1 | RSPO4     | 0.383219633 | 8.33E-17    |
| RP11-547C5.1 | ADAMTS9   | 0.626302342 | 3.36E-49    |

|              |            |             |          |
|--------------|------------|-------------|----------|
| RP11-547C5.1 | ABTB2      | 0.381493397 | 1.17E-16 |
| RP11-547C5.1 | KCNQ3      | 0.30973368  | 3.25E-11 |
| RP11-547C5.1 | ANXA1      | 0.56587797  | 1.58E-38 |
| RP11-547C5.1 | S100A11    | 0.462372762 | 1.23E-24 |
| RP11-547C5.1 | CEACAM6    | 0.230560104 | 1.05E-06 |
| RP11-547C5.1 | IER5L      | 0.541923532 | 7.11E-35 |
| RP11-547C5.1 | KRT80      | 0.261361457 | 2.74E-08 |
| RP11-547C5.1 | CDH6       | 0.325423925 | 2.75E-12 |
| RP11-547C5.1 | UNC5B      | 0.358249236 | 9.69E-15 |
| RP11-547C5.1 | PLEKHN1    | 0.459009269 | 2.92E-24 |
| RP11-547C5.1 | SYTL1      | 0.457739994 | 4.03E-24 |
| RP11-547C5.1 | TMEM163    | 0.287028791 | 9.00E-10 |
| RP11-547C5.1 | C4orf48    | 0.476865682 | 2.62E-26 |
| RP11-547C5.1 | B3GNT7     | 0.500101328 | 3.69E-29 |
| RP11-547C5.1 | BAIAP3     | 0.488978286 | 9.10E-28 |
| RP11-547C5.1 | PHLDA2     | 0.539232142 | 1.75E-34 |
| RP11-547C5.1 | GAP43      | 0.380094176 | 1.55E-16 |
| RP11-547C5.1 | S100A1     | 0.401231158 | 2.07E-18 |
| RP11-547C5.1 | PTPRE      | 0.348290596 | 5.77E-14 |
| RP11-547C5.1 | CCND1      | 0.368017571 | 1.58E-15 |
| RP11-547C5.1 | ST6GALNAC5 | 0.27359403  | 5.62E-09 |
| RP11-547C5.1 | KRT17      | 0.273428365 | 5.75E-09 |
| RP11-547C5.1 | HPCAL4     | 0.512058537 | 1.03E-30 |
| RP11-547C5.1 | GABBR2     | 0.460618001 | 1.93E-24 |
| RP11-547C5.1 | DIRAS3     | 0.537038016 | 3.64E-34 |
| RP11-547C5.1 | SERINC2    | 0.451897698 | 1.77E-23 |
| RP11-547C5.1 | PTCHD4     | 0.38109093  | 1.27E-16 |
| RP11-547C5.1 | EPS8       | 0.503885736 | 1.21E-29 |
| RP11-547C5.1 | LY6E       | 0.498192449 | 6.46E-29 |
| RP11-547C5.1 | UPP1       | 0.387985658 | 3.20E-17 |
| RP11-547C5.1 | AHNAK2     | 0.313726844 | 1.75E-11 |
| RP11-547C5.1 | PLXNC1     | 0.486528575 | 1.81E-27 |
| RP11-547C5.1 | TNC        | 0.322024812 | 4.75E-12 |
| RP11-547C5.1 | DUSP4      | 0.457726087 | 4.05E-24 |
| RP11-547C5.1 | NRCAM      | 0.421197825 | 2.63E-20 |
| RP11-547C5.1 | NRP2       | 0.500423046 | 3.36E-29 |
| RP11-547C5.1 | CTSC       | 0.384899606 | 5.96E-17 |
| RP11-547C5.1 | AMIGO2     | 0.524701188 | 2.00E-32 |
| RP11-547C5.1 | NAB2       | 0.535958196 | 5.21E-34 |
| RP11-547C5.1 | TBC1D2     | 0.320902276 | 5.68E-12 |
| RP11-547C5.1 | PHLDA3     | 0.394252985 | 8.91E-18 |
| RP11-547C5.1 | PTP4A3     | 0.397051237 | 4.98E-18 |
| RP11-547C5.1 | CRABP2     | 0.421477963 | 2.47E-20 |
| RP11-547C5.1 | GOS2       | 0.578226435 | 1.57E-40 |
| RP11-547C5.1 | S100A6     | 0.422695439 | 1.87E-20 |
| RP11-547C5.1 | FOXQ1      | 0.24195549  | 2.87E-07 |
| RP11-547C5.1 | LRG1       | 0.491864098 | 4.01E-28 |
| RP11-547C5.1 | LAMP5      | 0.339213238 | 2.78E-13 |
| RP11-547C5.1 | ALDH3B1    | 0.300078309 | 1.38E-10 |
| RP11-547C5.1 | CDH2       | 0.368096049 | 1.56E-15 |
| RP11-547C5.1 | SCG5       | 0.489548495 | 7.75E-28 |

|              |         |             |          |
|--------------|---------|-------------|----------|
| RP11-547C5.1 | ZCCHC16 | 0.625822864 | 4.17E-49 |
| RP11-547C5.1 | GRB7    | 0.477145961 | 2.42E-26 |
| RP11-547C5.1 | TIAM1   | 0.359810427 | 7.28E-15 |
| RP11-547C5.1 | FXD5    | 0.511848931 | 1.10E-30 |
| RP11-547C5.1 | CLDN9   | 0.47440774  | 5.09E-26 |
| RP11-547C5.1 | FAM43A  | 0.55200436  | 2.24E-36 |
| RP11-547C5.1 | CHST2   | 0.477330023 | 2.31E-26 |
| RP11-547C5.1 | HMGA2   | 0.552844204 | 1.67E-36 |
| RP11-547C5.1 | GALNT7  | 0.527796607 | 7.45E-33 |
| RP11-547C5.1 | CBLN1   | 0.359669791 | 7.47E-15 |
| RP11-547C5.1 | STRA6   | 0.405620686 | 8.14E-19 |
| RP11-547C5.1 | MUC21   | 0.437129497 | 6.51E-22 |
| RP11-547C5.1 | PRR36   | 0.513892911 | 5.88E-31 |
| RP11-547C5.1 | NFE2L3  | 0.231421248 | 9.50E-07 |
| RP11-547C5.1 | NR1D1   | 0.244785104 | 2.06E-07 |
| RP11-547C5.1 | MUC1    | 0.203632448 | 1.71E-05 |
| RP11-547C5.1 | NAT8L   | 0.584346598 | 1.49E-41 |
| RP11-547C5.1 | APOC1   | 0.457419979 | 4.38E-24 |
| RP11-547C5.1 | EVA1A   | 0.389636538 | 2.29E-17 |
| RP11-547C5.1 | ENTPD1  | 0.46570035  | 5.15E-25 |
| RP11-547C5.1 | COL1A1  | 0.243899847 | 2.29E-07 |
| RP11-547C5.1 | FNDC4   | 0.405897985 | 7.67E-19 |
| RP11-547C5.1 | FRMD3   | 0.462687526 | 1.13E-24 |
| RP11-547C5.1 | SHROOM4 | 0.43281132  | 1.81E-21 |
| RP11-547C5.1 | NELL2   | 0.560586156 | 1.08E-37 |
| RP11-547C5.1 | EPHB3   | 0.38504975  | 5.78E-17 |
| RP11-547C5.1 | TMC6    | 0.486003353 | 2.10E-27 |
| RP11-547C5.1 | NOD1    | 0.486655588 | 1.75E-27 |
| RP11-547C5.1 | GGCT    | 0.569829127 | 3.70E-39 |
| RP11-547C5.1 | ICAM1   | 0.267683279 | 1.22E-08 |
| RP11-547C5.1 | PRSS23  | 0.483395266 | 4.35E-27 |
| RP11-547C5.1 | CFI     | 0.342872479 | 1.48E-13 |
| RP11-547C5.1 | CD55    | 0.274671244 | 4.87E-09 |
| RP11-547C5.1 | RASD2   | 0.497364241 | 8.22E-29 |
| RP11-547C5.1 | KLK11   | 0.372189643 | 7.17E-16 |
| RP11-547C5.1 | ICAM5   | 0.479475188 | 1.28E-26 |
| RP11-547C5.1 | ADORA1  | 0.533556735 | 1.15E-33 |
| RP11-547C5.1 | ITGA2   | 0.23674925  | 5.23E-07 |
| RP11-547C5.1 | ABCC3   | 0.489954368 | 6.90E-28 |
| RP11-547C5.1 | MFGE8   | 0.549090875 | 6.16E-36 |
| RP11-547C5.1 | STK32A  | 0.45225163  | 1.62E-23 |
| RP11-547C5.1 | CYSLTR2 | 0.43437322  | 1.25E-21 |
| RP11-547C5.1 | LAD1    | 0.48051215  | 9.65E-27 |
| RP11-547C5.1 | MGAT3   | 0.213581864 | 6.35E-06 |
| RP11-547C5.1 | IGFBP6  | 0.60998782  | 4.32E-46 |
| RP11-547C5.1 | CYP2S1  | 0.233804118 | 7.29E-07 |
| RP11-547C5.1 | KCNJ2   | 0.48834521  | 1.09E-27 |
| RP11-547C5.1 | FAM20A  | 0.368776099 | 1.37E-15 |
| RP11-547C5.1 | TGFA    | 0.575074535 | 5.20E-40 |
| RP11-547C5.1 | MXRA8   | 0.467439359 | 3.26E-25 |
| RP11-547C5.1 | C8orf4  | 0.342607952 | 1.55E-13 |

|              |           |             |          |
|--------------|-----------|-------------|----------|
| RP11-547C5.1 | CLDN10    | 0.452577936 | 1.49E-23 |
| RP11-547C5.1 | PDE5A     | 0.518952129 | 1.23E-31 |
| RP11-547C5.1 | APOE      | 0.535249196 | 6.58E-34 |
| RP11-547C5.1 | SPOCK2    | 0.309772139 | 3.23E-11 |
| RP11-547C5.1 | TENM1     | 0.524189164 | 2.36E-32 |
| RP11-547C5.1 | SLIT1     | 0.475622519 | 3.67E-26 |
| RP11-547C5.1 | CXCL14    | 0.265855575 | 1.54E-08 |
| RP11-547C5.1 | ECM1      | 0.424567562 | 1.22E-20 |
| RP11-547C5.1 | DUSP5     | 0.395671269 | 6.64E-18 |
| RP11-547C5.1 | SEZ6L2    | 0.239636481 | 3.76E-07 |
| RP11-547C5.1 | THRSP     | 0.54270803  | 5.46E-35 |
| RP11-547C5.1 | C19orf33  | 0.365611143 | 2.49E-15 |
| RP11-547C5.1 | MPZL2     | 0.506855561 | 4.98E-30 |
| RP11-547C5.1 | CTSH      | 0.574267331 | 7.05E-40 |
| RP11-547C5.1 | CYP1B1    | 0.517918715 | 1.69E-31 |
| RP11-547C5.1 | ALOX5     | 0.206725312 | 1.26E-05 |
| RP11-547C5.1 | SYTL5     | 0.423159298 | 1.69E-20 |
| RP11-547C5.1 | TNFRSF12A | 0.591265309 | 9.74E-43 |
| RP11-547C5.1 | DUSP6     | 0.530773953 | 2.85E-33 |
| RP11-547C5.1 | ALOX15B   | 0.354139278 | 2.04E-14 |
| RP11-547C5.1 | SDC4      | 0.622539647 | 1.82E-48 |
| RP11-547C5.1 | MDK       | 0.441327977 | 2.38E-22 |
| RP11-547C5.1 | KRT19     | 0.336862582 | 4.14E-13 |
| RP11-547C5.1 | MET       | 0.404524545 | 1.03E-18 |
| RP11-547C5.1 | TESC      | 0.669709011 | 1.91E-58 |
| RP11-547C5.1 | CXCL17    | 0.397980288 | 4.11E-18 |
| RP11-547C5.1 | NPC2      | 0.687745229 | 9.11E-63 |
| RP11-547C5.1 | COMP      | 0.331756249 | 9.73E-13 |
| RP11-547C5.1 | TUSC3     | 0.506980729 | 4.80E-30 |
| RP11-547C5.1 | TMPRSS4   | 0.318491449 | 8.32E-12 |
| RP11-547C5.1 | LGALS3    | 0.494338645 | 1.97E-28 |
| RP11-547C5.1 | CRLF1     | 0.344292891 | 1.16E-13 |
| RP11-547C5.1 | CTXN1     | 0.497484584 | 7.93E-29 |
| RP11-547C5.1 | PCSK1N    | 0.349913235 | 4.33E-14 |
| RP11-547C5.1 | NMU       | 0.293793284 | 3.45E-10 |
| RP11-547C5.1 | GALE      | 0.618799941 | 9.53E-48 |
| RP11-547C5.1 | PCSK2     | 0.236842629 | 5.17E-07 |
| RP11-547C5.1 | GJB3      | 0.563315863 | 4.02E-38 |
| RP11-547C5.1 | SLPI      | 0.35371737  | 2.20E-14 |
| RP11-547C5.1 | AGR2      | 0.415343466 | 9.76E-20 |
| RP11-547C5.1 | MRC2      | 0.459262727 | 2.73E-24 |
| RP11-547C5.1 | GOLT1A    | 0.622988378 | 1.49E-48 |
| RP11-547C5.1 | SLC27A6   | 0.301814774 | 1.07E-10 |
| RP11-547C5.1 | KCNN4     | 0.401193693 | 2.09E-18 |
| RP11-547C5.1 | ETV4      | 0.457725606 | 4.05E-24 |
| RP11-547C5.1 | SYT12     | 0.558994312 | 1.90E-37 |
| RP11-547C5.1 | PVRL4     | 0.409870145 | 3.25E-19 |
| RP11-547C5.1 | PLCD3     | 0.531473445 | 2.27E-33 |
| RP11-547C5.1 | PLAU      | 0.478685156 | 1.59E-26 |
| RP11-547C5.1 | LRRK2     | 0.545538637 | 2.09E-35 |
| RP11-547C5.1 | SFN       | 0.333683293 | 7.06E-13 |



|               |          |              |          |
|---------------|----------|--------------|----------|
| RP11-547C5.1  | LPAR5    | 0.50709057   | 4.64E-30 |
| RP11-547C5.1  | NGEF     | 0.391652846  | 1.52E-17 |
| RP11-547C5.1  | DTX4     | 0.378589988  | 2.08E-16 |
| RP11-547C5.1  | CST6     | 0.492710613  | 3.15E-28 |
| RP11-547C5.1  | QPCT     | 0.589284905  | 2.14E-42 |
| RP11-547C5.1  | TIMP1    | 0.619106049  | 8.33E-48 |
| RP11-547C5.1  | CAMK2N1  | 0.557505639  | 3.23E-37 |
| RP11-547C5.1  | KLHDC8A  | 0.393284284  | 1.09E-17 |
| RP11-547C5.1  | PDLIM4   | 0.511650252  | 1.17E-30 |
| RP11-547C5.1  | SCEL     | 0.486062247  | 2.07E-27 |
| RP11-547C5.1  | LCN2     | 0.303383191  | 8.47E-11 |
| RP11-547C5.1  | PROS1    | 0.432191867  | 2.09E-21 |
| RP11-547C5.1  | GABRB2   | 0.442820624  | 1.66E-22 |
| RP11-547C5.1  | TMPRSS6  | 0.321912558  | 4.83E-12 |
| RP11-547C5.1  | KLK7     | 0.408467289  | 4.41E-19 |
| RP11-547C5.1  | PDZK1IP1 | 0.459863163  | 2.34E-24 |
| RP11-547C5.1  | CDH3     | 0.463900887  | 8.24E-25 |
| RP11-547C5.1  | LRP4     | 0.580827284  | 5.82E-41 |
| RP11-547C5.1  | IGSF1    | 0.29102536   | 5.12E-10 |
| RP11-547C5.1  | B3GNT3   | 0.303965463  | 7.76E-11 |
| RP11-547C5.1  | CLDN1    | 0.475137601  | 4.18E-26 |
| RP11-547C5.1  | GDF15    | 0.374592     | 4.52E-16 |
| RP11-547C5.1  | ARHGAP36 | 0.329578995  | 1.39E-12 |
| RP11-547C5.1  | LAMB3    | 0.447279547  | 5.56E-23 |
| RP11-547C5.1  | KLK10    | 0.399450853  | 3.02E-18 |
| RP11-547C5.1  | DPP4     | 0.396326768  | 5.80E-18 |
| RP11-547C5.1  | METTL7B  | 0.670763571  | 1.09E-58 |
| RP11-547C5.1  | LIPH     | 0.477382531  | 2.27E-26 |
| RP11-547C5.1  | CLDN16   | 0.535749867  | 5.58E-34 |
| RP11-547C5.1  | CHI3L1   | 0.466280919  | 4.42E-25 |
| RP11-547C5.1  | SLC22A31 | 0.5391298    | 1.82E-34 |
| RP11-547C5.1  | TACSTD2  | 0.473841646  | 5.93E-26 |
| RP11-547C5.1  | SFTPB    | 0.290822566  | 5.27E-10 |
| RP11-547C5.1  | RXRG     | 0.596102715  | 1.39E-43 |
| RP11-547C5.1  | DCSTAMP  | 0.446302743  | 7.07E-23 |
| RP11-547C5.1  | CITED1   | 0.624577667  | 7.31E-49 |
| RP11-547C5.1  | SERPINA1 | 0.4616859    | 1.46E-24 |
| RP11-547C5.1  | PRR15    | 0.657158603  | 1.29E-55 |
| RP11-547C5.1  | SLC34A2  | 0.337374748  | 3.80E-13 |
| RP11-547C5.1  | FN1      | 0.322535701  | 4.37E-12 |
| RP11-547C5.1  | ZCCHC12  | 0.469360017  | 1.96E-25 |
| RP11-259K15.2 | TFF3     | -0.368620888 | 1.41E-15 |
| RP11-259K15.2 | CCL21    | -0.251055083 | 9.78E-08 |
| RP11-259K15.2 | TPO      | -0.463584751 | 8.94E-25 |
| RP11-259K15.2 | MT1G     | -0.414029905 | 1.31E-19 |
| RP11-259K15.2 | DIO1     | -0.443533874 | 1.39E-22 |
| RP11-259K15.2 | DPT      | -0.229384133 | 1.19E-06 |
| RP11-259K15.2 | CDH16    | -0.397614455 | 4.43E-18 |
| RP11-259K15.2 | CRABP1   | -0.357339558 | 1.14E-14 |
| RP11-259K15.2 | SLC26A7  | -0.499563585 | 4.33E-29 |
| RP11-259K15.2 | MT1H     | -0.389623974 | 2.30E-17 |

|               |           |              |             |
|---------------|-----------|--------------|-------------|
| RP11-259K15.2 | SLC26A4   | -0.38831618  | 3.00E-17    |
| RP11-259K15.2 | SLC5A8    | -0.55623861  | 5.07E-37    |
| RP11-259K15.2 | PKHD1L1   | -0.464104536 | 7.81E-25    |
| RP11-259K15.2 | TFCP2L1   | -0.626480518 | 3.10E-49    |
| RP11-259K15.2 | WSCD2     | -0.399855567 | 2.77E-18    |
| RP11-259K15.2 | IPCEF1    | -0.444276675 | 1.16E-22    |
| RP11-259K15.2 | SLC5A5    | -0.322725111 | 4.24E-12    |
| RP11-259K15.2 | MT1F      | -0.364455912 | 3.09E-15    |
| RP11-259K15.2 | FOSB      | -0.226258813 | 1.67E-06    |
| RP11-259K15.2 | SEMA3D    | -0.483160634 | 4.64E-27    |
| RP11-259K15.2 | BMP8A     | -0.389374001 | 2.42E-17    |
| RP11-259K15.2 | MATN2     | -0.54210579  | 6.69E-35    |
| RP11-259K15.2 | PLA2R1    | -0.518797835 | 1.29E-31    |
| RP11-259K15.2 | COL23A1   | -0.421017016 | 2.74E-20    |
| RP11-259K15.2 | HGD       | -0.482227754 | 6.01E-27    |
| RP11-259K15.2 | TCEAL2    | -0.340518625 | 2.22E-13    |
| RP11-259K15.2 | CHRD1     | -0.294025344 | 3.33E-10    |
| RP11-259K15.2 | TNFRSF11B | -0.585190877 | 1.07E-41    |
| RP11-259K15.2 | FAM167A   | -0.459821458 | 2.37E-24    |
| RP11-259K15.2 | KIT       | -0.403119722 | 1.39E-18    |
| RP11-259K15.2 | SLC4A4    | -0.603880898 | 5.67E-45    |
| RP11-259K15.2 | SMOC2     | -0.271243524 | 7.67E-09    |
| RP11-259K15.2 | FHL1      | -0.492797953 | 3.07E-28    |
| RP11-259K15.2 | OTOS      | -0.328352758 | 1.70E-12    |
| RP11-259K15.2 | IGFBPL1   | -0.560604623 | 1.07E-37    |
| RP11-259K15.2 | HBB       | -0.285316747 | 1.14E-09    |
| RP11-259K15.2 | BEX1      | -0.287186657 | 8.81E-10    |
| RP11-259K15.2 | FABP4     | -0.40675542  | 6.38E-19    |
| RP11-259K15.2 | LMOD1     | -0.342278824 | 1.64E-13    |
| RP11-259K15.2 | SOD3      | -0.442483215 | 1.80E-22    |
| RP11-259K15.2 | TMEM171   | -0.466414757 | 4.27E-25    |
| RP11-259K15.2 | PI16      | -0.209113823 | 9.97E-06    |
| RP11-259K15.2 | ZMAT4     | -0.450048256 | 2.80E-23    |
| RP11-259K15.2 | MFAP4     | -0.140307281 | 0.003219457 |
| RP11-259K15.2 | CWH43     | -0.522631144 | 3.87E-32    |
| RP11-259K15.2 | SPX       | -0.486336279 | 1.92E-27    |
| RP11-259K15.2 | APOD      | -0.074969862 | 0.116759232 |
| RP11-259K15.2 | DPP6      | -0.40955466  | 3.48E-19    |
| RP11-259K15.2 | MMRN1     | -0.396717336 | 5.34E-18    |
| RP11-259K15.2 | WDR72     | -0.584984433 | 1.16E-41    |
| RP11-259K15.2 | MPPED2    | -0.459661111 | 2.47E-24    |
| RP11-259K15.2 | PAPSS2    | -0.408305926 | 4.56E-19    |
| RP11-259K15.2 | DCN       | -0.149387056 | 0.001696919 |
| RP11-259K15.2 | SORBS2    | -0.502294021 | 1.94E-29    |
| RP11-259K15.2 | EGR2      | -0.220669933 | 3.04E-06    |
| RP11-259K15.2 | EDN3      | -0.215251362 | 5.35E-06    |
| RP11-259K15.2 | DIO2      | -0.526736176 | 1.05E-32    |
| RP11-259K15.2 | ITPR1     | -0.468699895 | 2.34E-25    |
| RP11-259K15.2 | CFD       | -0.156083684 | 0.001033944 |
| RP11-259K15.2 | CPXM1     | -0.223074782 | 2.36E-06    |
| RP11-259K15.2 | ELMO1     | -0.413103993 | 1.60E-19    |

|               |            |              |             |
|---------------|------------|--------------|-------------|
| RP11-259K15.2 | GPC3       | -0.34936963  | 4.77E-14    |
| RP11-259K15.2 | MYOC       | -0.101450603 | 0.033582339 |
| RP11-259K15.2 | DEPTOR     | -0.507992682 | 3.54E-30    |
| RP11-259K15.2 | DGKI       | -0.505418267 | 7.66E-30    |
| RP11-259K15.2 | CARTPT     | -0.322239495 | 4.59E-12    |
| RP11-259K15.2 | IYD        | -0.515717345 | 3.35E-31    |
| RP11-259K15.2 | LYVE1      | -0.245811984 | 1.83E-07    |
| RP11-259K15.2 | CLCNKB     | -0.370234427 | 1.04E-15    |
| RP11-259K15.2 | NCAM1      | -0.579618167 | 9.25E-41    |
| RP11-259K15.2 | HBA2       | -0.174212243 | 0.000244618 |
| RP11-259K15.2 | GLT8D2     | -0.318221189 | 8.69E-12    |
| RP11-259K15.2 | OGDHL      | -0.593651178 | 3.75E-43    |
| RP11-259K15.2 | LIFR       | -0.506086391 | 6.27E-30    |
| RP11-259K15.2 | CSGALNACT1 | -0.481333116 | 7.70E-27    |
| RP11-259K15.2 | RAP1GAP    | -0.543317505 | 4.44E-35    |
| RP11-259K15.2 | COL9A3     | -0.311844404 | 2.35E-11    |
| RP11-259K15.2 | FBLN1      | -0.180295921 | 0.000145858 |
| RP11-259K15.2 | EFEMP1     | -0.39955039  | 2.95E-18    |
| RP11-259K15.2 | AOX1       | -0.415554386 | 9.32E-20    |
| RP11-259K15.2 | GRIN2C     | -0.376387961 | 3.19E-16    |
| RP11-259K15.2 | C11orf74   | -0.317424916 | 9.85E-12    |
| RP11-259K15.2 | PPARGC1A   | -0.660989919 | 1.83E-56    |
| RP11-259K15.2 | ANGPTL1    | -0.355555702 | 1.58E-14    |
| RP11-259K15.2 | SCARA5     | -0.240168655 | 3.53E-07    |
| RP11-259K15.2 | LTF        | -0.350252341 | 4.08E-14    |
| RP11-259K15.2 | CA4        | -0.290536953 | 5.49E-10    |
| RP11-259K15.2 | TG         | -0.416925936 | 6.87E-20    |
| RP11-259K15.2 | FCGBP      | -0.396755348 | 5.30E-18    |
| RP11-259K15.2 | PBX4       | -0.219934578 | 3.29E-06    |
| RP11-259K15.2 | CYR61      | -0.257510994 | 4.43E-08    |
| RP11-259K15.2 | FOS        | -0.27965787  | 2.49E-09    |
| RP11-259K15.2 | KHDRBS2    | -0.397181781 | 4.85E-18    |
| RP11-259K15.2 | MUM1L1     | -0.413430289 | 1.49E-19    |
| RP11-259K15.2 | RGS16      | -0.406533316 | 6.69E-19    |
| RP11-259K15.2 | MT1M       | -0.355588963 | 1.57E-14    |
| RP11-259K15.2 | LRP2       | -0.542079337 | 6.75E-35    |
| RP11-259K15.2 | MAFB       | -0.408200328 | 4.67E-19    |
| RP11-259K15.2 | KCNK2      | -0.491173493 | 4.88E-28    |
| RP11-259K15.2 | TBC1D4     | -0.450709556 | 2.38E-23    |
| RP11-259K15.2 | MIOX       | -0.288404197 | 7.42E-10    |
| RP11-259K15.2 | TPPP       | -0.482592559 | 5.44E-27    |
| RP11-259K15.2 | FMOD       | -0.523686039 | 2.77E-32    |
| RP11-259K15.2 | CITED2     | -0.543482248 | 4.20E-35    |
| RP11-259K15.2 | RGS8       | -0.407650434 | 5.26E-19    |
| RP11-259K15.2 | ABI3BP     | -0.433446629 | 1.56E-21    |
| RP11-259K15.2 | ADH1B      | -0.240850857 | 3.27E-07    |
| RP11-259K15.2 | OGN        | -0.214662677 | 5.68E-06    |
| RP11-259K15.2 | NR4A1      | -0.172323823 | 0.00028622  |
| RP11-259K15.2 | FOXJ1      | -0.267505313 | 1.25E-08    |
| RP11-259K15.2 | ALDH1A1    | -0.363570919 | 3.64E-15    |
| RP11-259K15.2 | OCA2       | -0.302134354 | 1.02E-10    |

|               |          |              |             |
|---------------|----------|--------------|-------------|
| RP11-259K15.2 | TMEM139  | -0.283071678 | 1.56E-09    |
| RP11-259K15.2 | ARHGAP24 | -0.446139564 | 7.36E-23    |
| RP11-259K15.2 | SLC25A15 | -0.647739494 | 1.41E-53    |
| RP11-259K15.2 | DES      | -0.224057721 | 2.12E-06    |
| RP11-259K15.2 | GDF10    | -0.319528019 | 7.07E-12    |
| RP11-259K15.2 | KIAA1324 | -0.366900545 | 1.95E-15    |
| RP11-259K15.2 | JUN      | -0.272725793 | 6.31E-09    |
| RP11-259K15.2 | C7       | -0.072011565 | 0.131948001 |
| RP11-259K15.2 | LGI3     | -0.460068041 | 2.22E-24    |
| RP11-259K15.2 | CDON     | -0.53698086  | 3.71E-34    |
| RP11-259K15.2 | BCL2     | -0.58988058  | 1.69E-42    |
| RP11-259K15.2 | HLF      | -0.432066483 | 2.16E-21    |
| RP11-259K15.2 | EGR1     | -0.306987688 | 4.93E-11    |
| RP11-259K15.2 | IP6K3    | -0.473845533 | 5.92E-26    |
| RP11-259K15.2 | SCUBE3   | -0.326414908 | 2.34E-12    |
| RP11-259K15.2 | PKNOX2   | -0.252176642 | 8.54E-08    |
| RP11-259K15.2 | SMAD9    | -0.551456687 | 2.71E-36    |
| RP11-259K15.2 | IQGAP2   | -0.62319245  | 1.36E-48    |
| RP11-259K15.2 | GNA14    | -0.48085633  | 8.78E-27    |
| RP11-259K15.2 | LAYN     | -0.277275219 | 3.44E-09    |
| RP11-259K15.2 | AVPR1A   | -0.400274895 | 2.54E-18    |
| RP11-259K15.2 | PDLIM3   | -0.39095811  | 1.75E-17    |
| RP11-259K15.2 | GPM6A    | -0.536570525 | 4.25E-34    |
| RP11-259K15.2 | SDPR     | -0.286201881 | 1.01E-09    |
| RP11-259K15.2 | CRYAB    | -0.417768661 | 5.69E-20    |
| RP11-259K15.2 | FOXA2    | -0.172917117 | 0.000272487 |
| RP11-259K15.2 | C8orf88  | -0.489007214 | 9.03E-28    |
| RP11-259K15.2 | ISM1     | -0.333594136 | 7.17E-13    |
| RP11-259K15.2 | BMP2     | -0.310603755 | 2.84E-11    |
| RP11-259K15.2 | ID4      | -0.397322625 | 4.71E-18    |
| RP11-259K15.2 | NUPR1    | -0.50288073  | 1.63E-29    |
| RP11-259K15.2 | SERTM1   | -0.662543769 | 8.19E-57    |
| RP11-259K15.2 | IRS1     | -0.484810537 | 2.94E-27    |
| RP11-259K15.2 | FIBIN    | -0.447831184 | 4.85E-23    |
| RP11-259K15.2 | PODN     | -0.177692501 | 0.000182359 |
| RP11-259K15.2 | TDRD9    | -0.464860647 | 6.41E-25    |
| RP11-259K15.2 | EPHA3    | -0.278523102 | 2.90E-09    |
| RP11-259K15.2 | AIF1L    | -0.474279201 | 5.27E-26    |
| RP11-259K15.2 | EBF4     | -0.383429678 | 7.99E-17    |
| RP11-259K15.2 | ADM2     | -0.513181156 | 7.32E-31    |
| RP11-259K15.2 | GSTM3    | -0.423487109 | 1.57E-20    |
| RP11-259K15.2 | HSD17B6  | -0.174754202 | 0.000233766 |
| RP11-259K15.2 | AGR3     | -0.278747159 | 2.82E-09    |
| RP11-259K15.2 | EPHB1    | -0.635322362 | 5.33E-51    |
| RP11-259K15.2 | TMOD1    | -0.373879925 | 5.18E-16    |
| RP11-259K15.2 | WASF3    | -0.60434584  | 4.67E-45    |
| RP11-259K15.2 | SELV     | -0.434123306 | 1.33E-21    |
| RP11-259K15.2 | ENPP1    | -0.464143873 | 7.73E-25    |
| RP11-259K15.2 | SYNE1    | -0.477908759 | 1.97E-26    |
| RP11-259K15.2 | PLCH1    | -0.405790586 | 7.85E-19    |
| RP11-259K15.2 | CCDC146  | -0.362493737 | 4.44E-15    |

|               |          |              |             |
|---------------|----------|--------------|-------------|
| RP11-259K15.2 | SLC16A2  | -0.325053413 | 2.92E-12    |
| RP11-259K15.2 | IER2     | -0.212648901 | 6.98E-06    |
| RP11-259K15.2 | KCNAB1   | -0.219815719 | 3.33E-06    |
| RP11-259K15.2 | SYNDIG1  | -0.418639329 | 4.68E-20    |
| RP11-259K15.2 | C16orf89 | -0.257364973 | 4.52E-08    |
| RP11-259K15.2 | CTGF     | -0.216539919 | 4.68E-06    |
| RP11-259K15.2 | NR4A3    | -0.14329352  | 0.00261836  |
| RP11-259K15.2 | KIAA1456 | -0.55733229  | 3.44E-37    |
| RP11-259K15.2 | AQP4     | -0.401274634 | 2.05E-18    |
| RP11-259K15.2 | RNF150   | -0.455120549 | 7.85E-24    |
| RP11-259K15.2 | C1S      | -0.118936396 | 0.012640272 |
| RP11-259K15.2 | PFKFB2   | -0.659115045 | 4.78E-56    |
| RP11-259K15.2 | PROX1    | -0.445940921 | 7.73E-23    |
| RP11-259K15.2 | TCF7L1   | -0.333068984 | 7.82E-13    |
| RP11-259K15.2 | HSPB6    | -0.186127484 | 8.74E-05    |
| RP11-259K15.2 | FHDC1    | -0.380445496 | 1.44E-16    |
| RP11-259K15.2 | PRR15L   | -0.386454355 | 4.36E-17    |
| RP11-259K15.2 | SLC1A1   | -0.559642179 | 1.51E-37    |
| RP11-259K15.2 | BTBD11   | -0.351582348 | 3.22E-14    |
| RP11-259K15.2 | TRIM58   | -0.593766208 | 3.58E-43    |
| RP11-259K15.2 | LRIG1    | -0.576407825 | 3.14E-40    |
| RP11-259K15.2 | ROR2     | -0.352885405 | 2.55E-14    |
| RP11-259K15.2 | GPR125   | -0.493918821 | 2.23E-28    |
| RP11-259K15.2 | FLRT1    | -0.377533721 | 2.55E-16    |
| RP11-259K15.2 | PGF      | -0.28704872  | 8.98E-10    |
| RP11-259K15.2 | DUSP1    | -0.26798666  | 1.17E-08    |
| RP11-259K15.2 | PLA2G7   | -0.329719429 | 1.36E-12    |
| RP11-259K15.2 | PLSCR4   | -0.485788362 | 2.23E-27    |
| RP11-259K15.2 | FAM46B   | -0.420588029 | 3.02E-20    |
| RP11-259K15.2 | GLDC     | -0.427011337 | 6.98E-21    |
| RP11-259K15.2 | ZBTB16   | -0.488199381 | 1.13E-27    |
| RP11-259K15.2 | OMD      | -0.171013043 | 0.000318884 |
| RP11-259K15.2 | HSD11B2  | -0.186948508 | 8.13E-05    |
| RP11-259K15.2 | FGL2     | -0.193254446 | 4.58E-05    |
| RP11-259K15.2 | CLCNKA   | -0.35055936  | 3.86E-14    |
| RP11-259K15.2 | GATM     | -0.471883571 | 1.00E-25    |
| RP11-259K15.2 | TNS3     | -0.539908236 | 1.40E-34    |
| RP11-259K15.2 | TOB1     | -0.363673538 | 3.57E-15    |
| RP11-259K15.2 | MARC2    | -0.499421322 | 4.51E-29    |
| RP11-259K15.2 | LRRC2    | -0.617925469 | 1.40E-47    |
| RP11-259K15.2 | SORD     | -0.383030548 | 8.65E-17    |
| RP11-259K15.2 | RIMS4    | -0.368735138 | 1.38E-15    |
| RP11-259K15.2 | SLC29A4  | -0.299179908 | 1.58E-10    |
| RP11-259K15.2 | SLC39A14 | -0.646131131 | 3.09E-53    |
| RP11-259K15.2 | FAXDC2   | -0.474879952 | 4.48E-26    |
| RP11-259K15.2 | HSPB8    | -0.390102973 | 2.09E-17    |
| RP11-259K15.2 | CCL19    | 0.033217233  | 0.48756583  |
| RP11-259K15.2 | KCNIP3   | -0.377381742 | 2.63E-16    |
| RP11-259K15.2 | CGNL1    | -0.45579307  | 6.62E-24    |
| RP11-259K15.2 | ATF3     | -0.098925587 | 0.038275121 |
| RP11-259K15.2 | SGCD     | -0.464811926 | 6.50E-25    |

|               |          |              |             |
|---------------|----------|--------------|-------------|
| RP11-259K15.2 | STARD13  | -0.51873954  | 1.31E-31    |
| RP11-259K15.2 | LDHD     | -0.374141331 | 4.93E-16    |
| RP11-259K15.2 | RCAN1    | -0.378397864 | 2.16E-16    |
| RP11-259K15.2 | ID3      | -0.398042307 | 4.05E-18    |
| RP11-259K15.2 | SYTL3    | -0.441232353 | 2.43E-22    |
| RP11-259K15.2 | MT1E     | -0.246334441 | 1.72E-07    |
| RP11-259K15.2 | CAMK1D   | -0.431364247 | 2.54E-21    |
| RP11-259K15.2 | PRKCQ    | -0.470594059 | 1.41E-25    |
| RP11-259K15.2 | NUAK2    | -0.401798722 | 1.84E-18    |
| RP11-259K15.2 | LIPG     | -0.372800332 | 6.37E-16    |
| RP11-259K15.2 | SLC25A25 | -0.464758595 | 6.59E-25    |
| RP11-259K15.2 | PRKX     | -0.384883296 | 5.98E-17    |
| RP11-259K15.2 | SRPX     | -0.150366867 | 0.00158021  |
| RP11-259K15.2 | FAM189A1 | -0.324320683 | 3.28E-12    |
| RP11-259K15.2 | PLEKHH1  | -0.409974498 | 3.18E-19    |
| RP11-259K15.2 | WNT11    | -0.26062978  | 3.00E-08    |
| RP11-259K15.2 | SNAI1    | -0.316201003 | 1.19E-11    |
| RP11-259K15.2 | FDCSP    | -0.031526236 | 0.510005917 |
| RP11-259K15.2 | MT1X     | -0.213917492 | 6.13E-06    |
| RP11-259K15.2 | ACACB    | -0.5678971   | 7.55E-39    |
| RP11-259K15.2 | ARC      | 0.002470732  | 0.958831429 |
| RP11-259K15.2 | KLK4     | -0.4298798   | 3.59E-21    |
| RP11-259K15.2 | ZFPM2    | -0.351391151 | 3.33E-14    |
| RP11-259K15.2 | AKAP12   | -0.4516749   | 1.87E-23    |
| RP11-259K15.2 | GJB6     | -0.380070674 | 1.55E-16    |
| RP11-259K15.2 | ERO1LB   | -0.477026302 | 2.50E-26    |
| RP11-259K15.2 | DNALI1   | -0.160409078 | 0.00074292  |
| RP11-259K15.2 | HKDC1    | -0.472936074 | 7.56E-26    |
| RP11-259K15.2 | ZFP36L2  | -0.478105825 | 1.87E-26    |
| RP11-259K15.2 | CAPSL    | -0.233693851 | 7.38E-07    |
| RP11-259K15.2 | CYP7B1   | -0.518050779 | 1.63E-31    |
| RP11-259K15.2 | CPQ      | -0.334508135 | 6.15E-13    |
| RP11-259K15.2 | RPS6KA6  | -0.458618269 | 3.22E-24    |
| RP11-259K15.2 | TLE1     | -0.503739199 | 1.26E-29    |
| RP11-259K15.2 | TP53INP2 | -0.389641152 | 2.29E-17    |
| RP11-259K15.2 | KATNAL2  | -0.488630495 | 1.00E-27    |
| RP11-259K15.2 | SGPP2    | -0.407387531 | 5.56E-19    |
| RP11-259K15.2 | CTH      | -0.498796104 | 5.41E-29    |
| RP11-259K15.2 | KIF12    | -0.216396309 | 4.75E-06    |
| RP11-259K15.2 | TMEM220  | -0.417137132 | 6.55E-20    |
| RP11-259K15.2 | CENPJ    | -0.406980245 | 6.08E-19    |
| RP11-259K15.2 | FAM155B  | -0.128826203 | 0.006876145 |
| RP11-259K15.2 | WFS1     | -0.466774314 | 3.88E-25    |
| RP11-259K15.2 | SELENBP1 | -0.17695204  | 0.000194208 |
| RP11-259K15.2 | SNTA1    | -0.451649582 | 1.88E-23    |
| RP11-259K15.2 | FRAS1    | -0.511515704 | 1.22E-30    |
| RP11-259K15.2 | FBLN7    | -0.47665171  | 2.77E-26    |
| RP11-259K15.2 | AGPAT9   | -0.470986097 | 1.27E-25    |
| RP11-259K15.2 | GPR83    | -0.300380205 | 1.32E-10    |
| RP11-259K15.2 | PRTG     | -0.523737881 | 2.72E-32    |
| RP11-259K15.2 | EGR3     | -0.030117343 | 0.529105506 |

|               |          |              |             |
|---------------|----------|--------------|-------------|
| RP11-259K15.2 | GRAMD2   | -0.426936943 | 7.10E-21    |
| RP11-259K15.2 | HYOU1    | -0.552118712 | 2.15E-36    |
| RP11-259K15.2 | FBLN5    | -0.226664892 | 1.60E-06    |
| RP11-259K15.2 | ITM2A    | -0.356834718 | 1.25E-14    |
| RP11-259K15.2 | SRF      | -0.242647314 | 2.65E-07    |
| RP11-259K15.2 | FGFR2    | -0.403944221 | 1.17E-18    |
| RP11-259K15.2 | MT1A     | -0.196147859 | 3.50E-05    |
| RP11-259K15.2 | MAMDC2   | -0.212401963 | 7.16E-06    |
| RP11-259K15.2 | FHL2     | -0.317444135 | 9.82E-12    |
| RP11-259K15.2 | FTCDNL1  | -0.602164243 | 1.16E-44    |
| RP11-259K15.2 | PKIA     | -0.222073199 | 2.62E-06    |
| RP11-259K15.2 | DNAJB4   | -0.39388967  | 9.60E-18    |
| RP11-259K15.2 | SLC25A33 | -0.380985682 | 1.30E-16    |
| RP11-259K15.2 | EYA2     | -0.423213576 | 1.67E-20    |
| RP11-259K15.2 | LPAR1    | -0.4267205   | 7.47E-21    |
| RP11-259K15.2 | STX11    | -0.470852415 | 1.32E-25    |
| RP11-259K15.2 | ARHGEF28 | -0.635990485 | 3.90E-51    |
| RP11-259K15.2 | OR2W3    | -0.495739585 | 1.32E-28    |
| RP11-259K15.2 | ALDH1B1  | -0.637322111 | 2.09E-51    |
| RP11-259K15.2 | CXCL12   | -0.190405718 | 5.95E-05    |
| RP11-259K15.2 | OLFM2    | -0.128484021 | 0.007027366 |
| RP11-259K15.2 | TUB      | -0.500170506 | 3.62E-29    |
| RP11-259K15.2 | HTRA3    | -0.105030754 | 0.027774717 |
| RP11-259K15.2 | CKB      | -0.240010916 | 3.60E-07    |
| RP11-259K15.2 | RGS2     | -0.125296373 | 0.008585566 |
| RP11-259K15.2 | SHANK2   | -0.426858933 | 7.23E-21    |
| RP11-259K15.2 | CNTFR    | -0.339837448 | 2.50E-13    |
| RP11-259K15.2 | CYTH3    | -0.40263627  | 1.54E-18    |
| RP11-259K15.2 | PLAC9    | -0.029120582 | 0.542833737 |
| RP11-259K15.2 | WVOX     | -0.419279369 | 4.06E-20    |
| RP11-259K15.2 | NPR3     | -0.33312657  | 7.75E-13    |
| RP11-259K15.2 | SDC2     | -0.328818693 | 1.58E-12    |
| RP11-259K15.2 | KLF15    | -0.416249515 | 7.98E-20    |
| RP11-259K15.2 | TMEM164  | -0.570871567 | 2.51E-39    |
| RP11-259K15.2 | LONRF3   | -0.283693137 | 1.43E-09    |
| RP11-259K15.2 | GBP1     | -0.1465462   | 0.002081398 |
| RP11-259K15.2 | ARHGAP6  | -0.495258544 | 1.51E-28    |
| RP11-259K15.2 | TMEM119  | -0.116841958 | 0.014304421 |
| RP11-259K15.2 | SH3RF1   | -0.566590497 | 1.22E-38    |
| RP11-259K15.2 | CRELD2   | -0.222241205 | 2.57E-06    |
| RP11-259K15.2 | PCP4     | -0.085385105 | 0.073908252 |
| RP11-259K15.2 | GCSH     | -0.369472691 | 1.20E-15    |
| RP11-259K15.2 | IMPA2    | -0.450359289 | 2.59E-23    |
| RP11-259K15.2 | C1R      | -0.053924706 | 0.259553448 |
| RP11-259K15.2 | SUCNR1   | -0.227356703 | 1.48E-06    |
| RP11-259K15.2 | SFRP1    | -0.28821143  | 7.63E-10    |
| RP11-259K15.2 | UGT8     | -0.606576655 | 1.83E-45    |
| RP11-259K15.2 | TLE4     | -0.209443453 | 9.64E-06    |
| RP11-259K15.2 | ANTXR1   | -0.394986639 | 7.65E-18    |
| RP11-259K15.2 | GPX3     | -0.446706203 | 6.40E-23    |
| RP11-259K15.2 | DPY19L2  | -0.339337193 | 2.72E-13    |

|               |          |              |             |
|---------------|----------|--------------|-------------|
| RP11-259K15.2 | FAM46C   | -0.4017144   | 1.87E-18    |
| RP11-259K15.2 | IL33     | -0.237459912 | 4.82E-07    |
| RP11-259K15.2 | PEG3     | -0.520470166 | 7.64E-32    |
| RP11-259K15.2 | FAHD2A   | -0.409702242 | 3.37E-19    |
| RP11-259K15.2 | PTGDS    | -0.021864975 | 0.647764087 |
| RP11-259K15.2 | CHCHD10  | -0.318610107 | 8.17E-12    |
| RP11-259K15.2 | CD36     | -0.401310447 | 2.04E-18    |
| RP11-259K15.2 | ANKRD37  | -0.164137055 | 0.000555021 |
| RP11-259K15.2 | TSPAN33  | -0.320048548 | 6.51E-12    |
| RP11-259K15.2 | PRDM16   | -0.389193443 | 2.51E-17    |
| RP11-259K15.2 | UST      | -0.286626258 | 9.52E-10    |
| RP11-259K15.2 | NEXN     | -0.375448077 | 3.83E-16    |
| RP11-259K15.2 | NUPR1L   | -0.140001813 | 0.003287526 |
| RP11-259K15.2 | SLC24A3  | -0.570918657 | 2.47E-39    |
| RP11-259K15.2 | MARC1    | -0.341165828 | 1.99E-13    |
| RP11-259K15.2 | MYH11    | -0.197852238 | 2.98E-05    |
| RP11-259K15.2 | APOA1    | -0.199000417 | 2.67E-05    |
| RP11-259K15.2 | TMEM178B | -0.331121915 | 1.08E-12    |
| RP11-259K15.2 | CAPN6    | -0.184735696 | 9.89E-05    |
| RP11-259K15.2 | PPM1L    | -0.544459435 | 3.01E-35    |
| RP11-259K15.2 | FZD8     | -0.462337932 | 1.24E-24    |
| RP11-259K15.2 | RCAN2    | -0.361767814 | 5.08E-15    |
| RP11-259K15.2 | COPZ2    | -0.421648971 | 2.38E-20    |
| RP11-259K15.2 | GAS1     | -0.313396315 | 1.85E-11    |
| RP11-259K15.2 | DACT1    | -0.404153502 | 1.11E-18    |
| RP11-259K15.2 | WBSCR17  | -0.226163994 | 1.69E-06    |
| RP11-259K15.2 | NCS1     | -0.383193306 | 8.37E-17    |
| RP11-259K15.2 | SPIRE2   | -0.252290324 | 8.42E-08    |
| RP11-259K15.2 | C15orf52 | -0.52489513  | 1.88E-32    |
| RP11-259K15.2 | SPAG5    | -0.324459896 | 3.21E-12    |
| RP11-259K15.2 | ARL4D    | -0.351635607 | 3.19E-14    |
| RP11-259K15.2 | FAM189A2 | -0.112235088 | 0.018656803 |
| RP11-259K15.2 | MAP1LC3A | -0.231956268 | 8.95E-07    |
| RP11-259K15.2 | KLF6     | -0.148530927 | 0.001805309 |
| RP11-259K15.2 | ADD3     | -0.356896418 | 1.24E-14    |
| RP11-259K15.2 | TSPAN7   | -0.160343833 | 0.00074668  |
| RP11-259K15.2 | KLF9     | -0.316189301 | 1.20E-11    |
| RP11-259K15.2 | KCNQ1    | -0.418796271 | 4.52E-20    |
| RP11-259K15.2 | MAN1A1   | -0.290668262 | 5.39E-10    |
| RP11-259K15.2 | MLF1     | -0.264603631 | 1.81E-08    |
| RP11-259K15.2 | RARB     | -0.409000148 | 3.92E-19    |
| RP11-259K15.2 | CDC42EP2 | -0.139518666 | 0.003397859 |
| RP11-259K15.2 | FAM3B    | -0.209017658 | 1.01E-05    |
| RP11-259K15.2 | GADD45B  | -0.178880032 | 0.000164759 |
| RP11-259K15.2 | TMEM47   | -0.313813742 | 1.73E-11    |
| RP11-259K15.2 | SDF2L1   | -0.116777847 | 0.014358265 |
| RP11-259K15.2 | CCDC85A  | -0.533646198 | 1.11E-33    |
| RP11-259K15.2 | CRYBG3   | -0.549098148 | 6.15E-36    |
| RP11-259K15.2 | FBLN2    | -0.146695413 | 0.002059371 |
| RP11-259K15.2 | PEBP4    | -0.1531573   | 0.001286998 |
| RP11-259K15.2 | CDADC1   | -0.414988086 | 1.06E-19    |



|               |          |              |             |
|---------------|----------|--------------|-------------|
| RP11-259K15.2 | FAM63A   | -0.475065758 | 4.26E-26    |
| RP11-259K15.2 | GLUL     | -0.380655273 | 1.38E-16    |
| RP11-259K15.2 | FREM2    | -0.567199191 | 9.76E-39    |
| RP11-259K15.2 | ACKR3    | -0.293673365 | 3.51E-10    |
| RP11-259K15.2 | DENND6A  | -0.587743307 | 3.94E-42    |
| RP11-259K15.2 | CLDN8    | -0.356366727 | 1.36E-14    |
| RP11-259K15.2 | UTS2R    | -0.217799963 | 4.11E-06    |
| RP11-259K15.2 | SCNN1B   | -0.210256676 | 8.89E-06    |
| RP11-259K15.2 | TTC30A   | -0.566626949 | 1.20E-38    |
| RP11-259K15.2 | CORO2B   | -0.275113338 | 4.59E-09    |
| RP11-259K15.2 | TC2N     | -0.548825112 | 6.76E-36    |
| RP11-259K15.2 | ALDH2    | -0.352944339 | 2.53E-14    |
| RP11-259K15.2 | GPR183   | -0.074790438 | 0.117639647 |
| RP11-259K15.2 | C4orf47  | -0.157788212 | 0.000908566 |
| RP11-259K15.2 | SLC25A42 | -0.294026327 | 3.33E-10    |
| RP11-259K15.2 | LGMN     | -0.542810153 | 5.27E-35    |
| RP11-259K15.2 | ACSF2    | -0.426792978 | 7.34E-21    |
| RP11-259K15.2 | KIAA1467 | -0.611610738 | 2.16E-46    |
| RP11-259K15.2 | PRKG1    | -0.345187407 | 9.93E-14    |
| RP11-259K15.2 | GNAI1    | -0.422914087 | 1.78E-20    |
| RP11-259K15.2 | ABCC4    | -0.507034572 | 4.72E-30    |
| RP11-259K15.2 | PRPS1    | -0.541259235 | 8.89E-35    |
| RP11-259K15.2 | TSPAN5   | -0.437507356 | 5.95E-22    |
| RP11-259K15.2 | CR2      | -0.206639149 | 1.27E-05    |
| RP11-259K15.2 | CCDC170  | -0.477542802 | 2.18E-26    |
| RP11-259K15.2 | RRAD     | 0.002086921  | 0.965222276 |
| RP11-259K15.2 | SCGB2A1  | -0.275252764 | 4.51E-09    |
| RP11-259K15.2 | SESN3    | -0.337576285 | 3.67E-13    |
| RP11-259K15.2 | SGK223   | -0.281653873 | 1.90E-09    |
| RP11-259K15.2 | NDRG2    | -0.414932912 | 1.07E-19    |
| RP11-259K15.2 | C3orf52  | -0.396120201 | 6.05E-18    |
| RP11-259K15.2 | FLRT3    | 0.185330927  | 9.39E-05    |
| RP11-259K15.2 | MST1R    | 0.470573634  | 1.42E-25    |
| RP11-259K15.2 | SDC1     | 0.042894812  | 0.369934308 |
| RP11-259K15.2 | ST8SIA4  | 0.164620223  | 0.000534194 |
| RP11-259K15.2 | UBTD1    | 0.64501232   | 5.31E-53    |
| RP11-259K15.2 | EPHA2    | 0.269682252  | 9.41E-09    |
| RP11-259K15.2 | TMEM130  | 0.517810791  | 1.75E-31    |
| RP11-259K15.2 | SPINK2   | 0.368144315  | 1.55E-15    |
| RP11-259K15.2 | MMP16    | 0.301758082  | 1.08E-10    |
| RP11-259K15.2 | SIGLEC15 | 0.45857088   | 3.26E-24    |
| RP11-259K15.2 | RIN1     | 0.711558333  | 5.59E-69    |
| RP11-259K15.2 | IL1RN    | 0.141294964  | 0.003008034 |
| RP11-259K15.2 | FCER1G   | 0.322151567  | 4.65E-12    |
| RP11-259K15.2 | CD276    | 0.544957284  | 2.54E-35    |
| RP11-259K15.2 | CTSB     | 0.328733945  | 1.60E-12    |
| RP11-259K15.2 | FAM171A2 | 0.367603703  | 1.71E-15    |
| RP11-259K15.2 | ASPHD1   | 0.491775591  | 4.11E-28    |
| RP11-259K15.2 | C15orf48 | 0.264797735  | 1.77E-08    |
| RP11-259K15.2 | DYSF     | 0.357324057  | 1.15E-14    |
| RP11-259K15.2 | PDZRN4   | 0.400655373  | 2.34E-18    |

|               |          |             |             |
|---------------|----------|-------------|-------------|
| RP11-259K15.2 | EFHD2    | 0.502443801 | 1.85E-29    |
| RP11-259K15.2 | ASF1B    | 0.258616969 | 3.86E-08    |
| RP11-259K15.2 | AQP1     | 0.307743822 | 4.39E-11    |
| RP11-259K15.2 | ARRDC2   | 0.53758849  | 3.03E-34    |
| RP11-259K15.2 | PRSS1    | 0.492409422 | 3.43E-28    |
| RP11-259K15.2 | MAPK13   | 0.363085552 | 3.98E-15    |
| RP11-259K15.2 | CST5     | 0.448312937 | 4.31E-23    |
| RP11-259K15.2 | AHR      | 0.202882989 | 1.84E-05    |
| RP11-259K15.2 | BAX      | 0.453865149 | 1.08E-23    |
| RP11-259K15.2 | C1orf115 | 0.387178292 | 3.77E-17    |
| RP11-259K15.2 | PLK3     | 0.414714199 | 1.12E-19    |
| RP11-259K15.2 | JAG2     | 0.414534846 | 1.17E-19    |
| RP11-259K15.2 | RAD23B   | 0.375600268 | 3.72E-16    |
| RP11-259K15.2 | CA12     | 0.128390976 | 0.007068997 |
| RP11-259K15.2 | ADTRP    | 0.449997534 | 2.84E-23    |
| RP11-259K15.2 | UCP2     | 0.547952813 | 9.12E-36    |
| RP11-259K15.2 | IGFBP2   | 0.288247882 | 7.59E-10    |
| RP11-259K15.2 | LOXL2    | 0.343444371 | 1.34E-13    |
| RP11-259K15.2 | GPX1     | 0.422998835 | 1.75E-20    |
| RP11-259K15.2 | P3H3     | 0.596359346 | 1.25E-43    |
| RP11-259K15.2 | C2orf81  | 0.713939991 | 1.23E-69    |
| RP11-259K15.2 | CDT1     | 0.292715468 | 4.02E-10    |
| RP11-259K15.2 | SNX25    | 0.432251581 | 2.06E-21    |
| RP11-259K15.2 | MTHFD1L  | 0.242904322 | 2.57E-07    |
| RP11-259K15.2 | CDC42BPG | 0.343575795 | 1.31E-13    |
| RP11-259K15.2 | MSN      | 0.226629291 | 1.61E-06    |
| RP11-259K15.2 | SIGLEC6  | 0.426515859 | 7.83E-21    |
| RP11-259K15.2 | F2R      | 0.132591766 | 0.005394513 |
| RP11-259K15.2 | TMEM184A | 0.444366458 | 1.14E-22    |
| RP11-259K15.2 | CKS2     | 0.27489037  | 4.73E-09    |
| RP11-259K15.2 | TAX1BP3  | 0.571528769 | 1.97E-39    |
| RP11-259K15.2 | PMEPA1   | 0.479231799 | 1.37E-26    |
| RP11-259K15.2 | CXCL16   | 0.336674413 | 4.27E-13    |
| RP11-259K15.2 | FAXC     | 0.396700173 | 5.36E-18    |
| RP11-259K15.2 | VTCN1    | 0.264832113 | 1.76E-08    |
| RP11-259K15.2 | SH2D4A   | 0.413022578 | 1.63E-19    |
| RP11-259K15.2 | RNF24    | 0.239320027 | 3.90E-07    |
| RP11-259K15.2 | LY6G6C   | 0.415734616 | 8.95E-20    |
| RP11-259K15.2 | NID1     | 0.220354416 | 3.14E-06    |
| RP11-259K15.2 | STAC     | 0.347788417 | 6.30E-14    |
| RP11-259K15.2 | RAB34    | 0.737907702 | 1.23E-76    |
| RP11-259K15.2 | HES4     | 0.441506454 | 2.28E-22    |
| RP11-259K15.2 | EPHA10   | 0.478129582 | 1.85E-26    |
| RP11-259K15.2 | ENTPD2   | 0.570284007 | 3.12E-39    |
| RP11-259K15.2 | DDB2     | 0.428416872 | 5.05E-21    |
| RP11-259K15.2 | NKAIN4   | 0.362933006 | 4.10E-15    |
| RP11-259K15.2 | TRIM29   | 0.342515976 | 1.58E-13    |
| RP11-259K15.2 | ADCY8    | 0.475459511 | 3.83E-26    |
| RP11-259K15.2 | SFTA2    | 0.317419739 | 9.86E-12    |
| RP11-259K15.2 | NRIP1    | 0.29349075  | 3.60E-10    |
| RP11-259K15.2 | VWA1     | 0.524823219 | 1.93E-32    |

|               |          |              |             |
|---------------|----------|--------------|-------------|
| RP11-259K15.2 | APLNR    | 0.238623323  | 4.22E-07    |
| RP11-259K15.2 | REN      | 0.669928545  | 1.70E-58    |
| RP11-259K15.2 | EDIL3    | 0.270128401  | 8.88E-09    |
| RP11-259K15.2 | AGRN     | 0.293666983  | 3.51E-10    |
| RP11-259K15.2 | TREM1    | 0.442297976  | 1.88E-22    |
| RP11-259K15.2 | SRL      | 0.220522281  | 3.09E-06    |
| RP11-259K15.2 | RASGRF1  | 0.601944537  | 1.27E-44    |
| RP11-259K15.2 | RMI2     | 0.506663455  | 5.28E-30    |
| RP11-259K15.2 | SAMD1    | 0.636776476  | 2.70E-51    |
| RP11-259K15.2 | MGAT4B   | 0.364372015  | 3.14E-15    |
| RP11-259K15.2 | NXN      | 0.484982585  | 2.80E-27    |
| RP11-259K15.2 | SH3BGRL3 | 0.55683508   | 4.10E-37    |
| RP11-259K15.2 | CA11     | 0.61947036   | 7.09E-48    |
| RP11-259K15.2 | PLD3     | 0.52905266   | 4.97E-33    |
| RP11-259K15.2 | LURAP1L  | 0.138606228  | 0.003615435 |
| RP11-259K15.2 | CARNS1   | 0.368128359  | 1.55E-15    |
| RP11-259K15.2 | PDLIM7   | 0.637931598  | 1.57E-51    |
| RP11-259K15.2 | BCL2L1   | 0.489983408  | 6.85E-28    |
| RP11-259K15.2 | GGT6     | 0.360165196  | 6.83E-15    |
| RP11-259K15.2 | DPYSL3   | 0.305186144  | 6.46E-11    |
| RP11-259K15.2 | FYN      | 0.503155185  | 1.50E-29    |
| RP11-259K15.2 | TK1      | 0.284048794  | 1.36E-09    |
| RP11-259K15.2 | AK1      | 0.507665464  | 3.90E-30    |
| RP11-259K15.2 | HIGD1B   | 0.401257826  | 2.06E-18    |
| RP11-259K15.2 | TMEM59L  | 0.385944521  | 4.83E-17    |
| RP11-259K15.2 | MEGF9    | 0.132396882  | 0.005463502 |
| RP11-259K15.2 | ZFP36L1  | 0.278857271  | 2.78E-09    |
| RP11-259K15.2 | ADRA1B   | 0.452683362  | 1.45E-23    |
| RP11-259K15.2 | EPHA4    | 0.284298143  | 1.32E-09    |
| RP11-259K15.2 | TCERG1L  | 0.394565595  | 8.35E-18    |
| RP11-259K15.2 | NGFR     | 0.443360052  | 1.45E-22    |
| RP11-259K15.2 | EBI3     | 0.435699216  | 9.15E-22    |
| RP11-259K15.2 | S100A10  | 0.407673758  | 5.23E-19    |
| RP11-259K15.2 | S100B    | 0.398946803  | 3.35E-18    |
| RP11-259K15.2 | CD44     | 0.42428083   | 1.31E-20    |
| RP11-259K15.2 | BHLHE41  | 0.336210535  | 4.62E-13    |
| RP11-259K15.2 | FBX02    | 0.619625671  | 6.62E-48    |
| RP11-259K15.2 | SLC30A2  | -0.010446731 | 0.827222481 |
| RP11-259K15.2 | FRMD5    | 0.242128544  | 2.82E-07    |
| RP11-259K15.2 | SAMD11   | 0.342504062  | 1.58E-13    |
| RP11-259K15.2 | SIPA1L2  | 0.382708082  | 9.22E-17    |
| RP11-259K15.2 | S100A16  | 0.476560651  | 2.84E-26    |
| RP11-259K15.2 | PPL      | 0.206831167  | 1.25E-05    |
| RP11-259K15.2 | ARHGDIB  | 0.384221626  | 6.82E-17    |
| RP11-259K15.2 | CDC42EP3 | 0.281542886  | 1.92E-09    |
| RP11-259K15.2 | RUNX2    | 0.556213408  | 5.11E-37    |
| RP11-259K15.2 | LAMC2    | 0.178542672  | 0.00016959  |
| RP11-259K15.2 | BRINP1   | 0.435145484  | 1.04E-21    |
| RP11-259K15.2 | GPRC5B   | 0.300691538  | 1.26E-10    |
| RP11-259K15.2 | AQP5     | 0.489906674  | 7.00E-28    |
| RP11-259K15.2 | PLAG1    | 0.419730056  | 3.67E-20    |

|               |          |             |             |
|---------------|----------|-------------|-------------|
| RP11-259K15.2 | PTPRU    | 0.290013612 | 5.91E-10    |
| RP11-259K15.2 | ANGPTL4  | 0.390965911 | 1.75E-17    |
| RP11-259K15.2 | PALM3    | 0.442510519 | 1.79E-22    |
| RP11-259K15.2 | ACP5     | 0.361068841 | 5.78E-15    |
| RP11-259K15.2 | DLG4     | 0.519494397 | 1.04E-31    |
| RP11-259K15.2 | ETNK2    | 0.630218423 | 5.65E-50    |
| RP11-259K15.2 | CD109    | 0.456108161 | 6.11E-24    |
| RP11-259K15.2 | SNX22    | 0.538392565 | 2.32E-34    |
| RP11-259K15.2 | TMEM98   | 0.484283967 | 3.40E-27    |
| RP11-259K15.2 | CTHRC1   | 0.373257473 | 5.84E-16    |
| RP11-259K15.2 | S100A2   | 0.373735677 | 5.33E-16    |
| RP11-259K15.2 | C11orf80 | 0.588577522 | 2.83E-42    |
| RP11-259K15.2 | SREBF1   | 0.495197625 | 1.54E-28    |
| RP11-259K15.2 | PRSS22   | 0.45322674  | 1.27E-23    |
| RP11-259K15.2 | CMTM3    | 0.527085166 | 9.36E-33    |
| RP11-259K15.2 | RDH5     | 0.528585874 | 5.78E-33    |
| RP11-259K15.2 | MYH10    | 0.271261183 | 7.65E-09    |
| RP11-259K15.2 | EVPL     | 0.445271379 | 9.11E-23    |
| RP11-259K15.2 | SCD      | 0.157891682 | 0.000901427 |
| RP11-259K15.2 | CD151    | 0.680136159 | 6.61E-61    |
| RP11-259K15.2 | S100A4   | 0.449125094 | 3.52E-23    |
| RP11-259K15.2 | BNIP1    | 0.575593396 | 4.28E-40    |
| RP11-259K15.2 | MAP3K6   | 0.489732002 | 7.35E-28    |
| RP11-259K15.2 | MANEAL   | 0.331407008 | 1.03E-12    |
| RP11-259K15.2 | CD207    | 0.430425874 | 3.16E-21    |
| RP11-259K15.2 | CD1A     | 0.430540626 | 3.08E-21    |
| RP11-259K15.2 | C3       | 0.292990703 | 3.87E-10    |
| RP11-259K15.2 | NT5E     | 0.346451035 | 7.97E-14    |
| RP11-259K15.2 | CACNG4   | 0.378921086 | 1.95E-16    |
| RP11-259K15.2 | FHOD1    | 0.540291693 | 1.23E-34    |
| RP11-259K15.2 | LEMD1    | 0.513452561 | 6.73E-31    |
| RP11-259K15.2 | ATP11A   | 0.36517538  | 2.70E-15    |
| RP11-259K15.2 | PPAP2C   | 0.455700592 | 6.77E-24    |
| RP11-259K15.2 | DRAM1    | 0.40575456  | 7.91E-19    |
| RP11-259K15.2 | CDA      | 0.43796705  | 5.33E-22    |
| RP11-259K15.2 | CCND2    | 0.468499763 | 2.46E-25    |
| RP11-259K15.2 | LCN6     | 0.526482306 | 1.14E-32    |
| RP11-259K15.2 | CDH4     | 0.33007076  | 1.29E-12    |
| RP11-259K15.2 | MMP11    | 0.467845043 | 2.93E-25    |
| RP11-259K15.2 | B3GAT1   | 0.256216731 | 5.20E-08    |
| RP11-259K15.2 | SPP1     | 0.171603149 | 0.000303771 |
| RP11-259K15.2 | HLA-DQB1 | 0.206988323 | 1.23E-05    |
| RP11-259K15.2 | SDC3     | 0.570304644 | 3.10E-39    |
| RP11-259K15.2 | CX3CL1   | 0.340218356 | 2.34E-13    |
| RP11-259K15.2 | SDK1     | 0.524128075 | 2.41E-32    |
| RP11-259K15.2 | DOCK9    | 0.261117629 | 2.82E-08    |
| RP11-259K15.2 | CSF2     | 0.567952855 | 7.39E-39    |
| RP11-259K15.2 | GRHL3    | 0.457042159 | 4.82E-24    |
| RP11-259K15.2 | TMEM92   | 0.556565525 | 4.51E-37    |
| RP11-259K15.2 | BASP1    | 0.520625974 | 7.27E-32    |
| RP11-259K15.2 | HRH1     | 0.434792664 | 1.13E-21    |

|               |          |             |             |
|---------------|----------|-------------|-------------|
| RP11-259K15.2 | ESM1     | 0.216642042 | 4.63E-06    |
| RP11-259K15.2 | B4GALNT3 | 0.308813416 | 3.73E-11    |
| RP11-259K15.2 | LMO3     | 0.377460391 | 2.59E-16    |
| RP11-259K15.2 | C9orf16  | 0.514396842 | 5.04E-31    |
| RP11-259K15.2 | SEMA3F   | 0.45863194  | 3.21E-24    |
| RP11-259K15.2 | PLA2G12B | 0.492758434 | 3.10E-28    |
| RP11-259K15.2 | KLK6     | 0.533888767 | 1.03E-33    |
| RP11-259K15.2 | ST3GAL5  | 0.569566736 | 4.08E-39    |
| RP11-259K15.2 | FAM132B  | 0.187765703 | 7.55E-05    |
| RP11-259K15.2 | CDKN1A   | 0.120949136 | 0.011204421 |
| RP11-259K15.2 | E2F1     | 0.286644413 | 9.50E-10    |
| RP11-259K15.2 | B3GNT8   | 0.524317144 | 2.27E-32    |
| RP11-259K15.2 | MTMR11   | 0.52213654  | 4.52E-32    |
| RP11-259K15.2 | MYO1G    | 0.376912332 | 2.88E-16    |
| RP11-259K15.2 | TMSB10   | 0.628937917 | 1.02E-49    |
| RP11-259K15.2 | UNC5CL   | 0.462190067 | 1.28E-24    |
| RP11-259K15.2 | ABR      | 0.319613534 | 6.97E-12    |
| RP11-259K15.2 | PLP2     | 0.56662624  | 1.20E-38    |
| RP11-259K15.2 | SRCIN1   | 0.323508027 | 3.74E-12    |
| RP11-259K15.2 | PDE9A    | 0.52358342  | 2.86E-32    |
| RP11-259K15.2 | TREM2    | 0.345746529 | 9.01E-14    |
| RP11-259K15.2 | KDELR3   | 0.392519453 | 1.27E-17    |
| RP11-259K15.2 | PC       | 0.485588017 | 2.36E-27    |
| RP11-259K15.2 | C2CD4A   | 0.281038371 | 2.06E-09    |
| RP11-259K15.2 | PELI1    | 0.402779809 | 1.49E-18    |
| RP11-259K15.2 | SSX1     | 0.314081176 | 1.66E-11    |
| RP11-259K15.2 | MROH6    | 0.583936185 | 1.75E-41    |
| RP11-259K15.2 | ESPN     | 0.638581212 | 1.15E-51    |
| RP11-259K15.2 | BMP1     | 0.582718017 | 2.80E-41    |
| RP11-259K15.2 | TM4SF4   | 0.452180941 | 1.64E-23    |
| RP11-259K15.2 | CORO2A   | 0.390477211 | 1.93E-17    |
| RP11-259K15.2 | CD164L2  | 0.533178367 | 1.30E-33    |
| RP11-259K15.2 | CTSS     | 0.234150276 | 7.01E-07    |
| RP11-259K15.2 | CLU      | 0.564849942 | 2.30E-38    |
| RP11-259K15.2 | TMSB4X   | 0.527298348 | 8.74E-33    |
| RP11-259K15.2 | WNT10A   | 0.511881662 | 1.09E-30    |
| RP11-259K15.2 | NAPSA    | 0.503925999 | 1.19E-29    |
| RP11-259K15.2 | PLEKHA4  | 0.536392803 | 4.51E-34    |
| RP11-259K15.2 | SFTPA1   | 0.333874045 | 6.84E-13    |
| RP11-259K15.2 | C1orf116 | 0.43477614  | 1.14E-21    |
| RP11-259K15.2 | TM4SF1   | 0.329437599 | 1.43E-12    |
| RP11-259K15.2 | SEL1L3   | 0.300413324 | 1.32E-10    |
| RP11-259K15.2 | VASN     | 0.577069424 | 2.45E-40    |
| RP11-259K15.2 | NPTXR    | 0.346633508 | 7.72E-14    |
| RP11-259K15.2 | PDE4C    | 0.355538469 | 1.58E-14    |
| RP11-259K15.2 | CDC42EP1 | 0.603992666 | 5.41E-45    |
| RP11-259K15.2 | ENDOD1   | 0.373721848 | 5.34E-16    |
| RP11-259K15.2 | RYR1     | 0.547078742 | 1.23E-35    |
| RP11-259K15.2 | IL1RAP   | 0.372661048 | 6.55E-16    |
| RP11-259K15.2 | SLC35F2  | 0.434983734 | 1.08E-21    |
| RP11-259K15.2 | ISYNA1   | 0.762798062 | 9.06E-85    |

|               |          |             |             |
|---------------|----------|-------------|-------------|
| RP11-259K15.2 | HLA-G    | 0.292914962 | 3.91E-10    |
| RP11-259K15.2 | CDKN2B   | 0.298619297 | 1.71E-10    |
| RP11-259K15.2 | ALDH1A3  | 0.225312475 | 1.85E-06    |
| RP11-259K15.2 | CLIP3    | 0.485737868 | 2.27E-27    |
| RP11-259K15.2 | ULBP2    | 0.36437166  | 3.14E-15    |
| RP11-259K15.2 | ETHE1    | 0.477031905 | 2.50E-26    |
| RP11-259K15.2 | XPR1     | 0.389576403 | 2.32E-17    |
| RP11-259K15.2 | SPTBN2   | 0.295738727 | 2.60E-10    |
| RP11-259K15.2 | IVL      | 0.463513408 | 9.11E-25    |
| RP11-259K15.2 | MARCO    | 0.300197873 | 1.36E-10    |
| RP11-259K15.2 | PLXND1   | 0.483698321 | 4.00E-27    |
| RP11-259K15.2 | EMILIN2  | 0.401282789 | 2.05E-18    |
| RP11-259K15.2 | PLAUR    | 0.447952313 | 4.71E-23    |
| RP11-259K15.2 | CDC42EP5 | 0.606308866 | 2.05E-45    |
| RP11-259K15.2 | TRPC5    | 0.450199944 | 2.70E-23    |
| RP11-259K15.2 | TMEM100  | 0.471303245 | 1.17E-25    |
| RP11-259K15.2 | QSOX1    | 0.541448942 | 8.34E-35    |
| RP11-259K15.2 | ARHGAP23 | 0.417855111 | 5.58E-20    |
| RP11-259K15.2 | MDFI     | 0.489269258 | 8.38E-28    |
| RP11-259K15.2 | FSTL3    | 0.494910972 | 1.67E-28    |
| RP11-259K15.2 | INF2     | 0.56483739  | 2.31E-38    |
| RP11-259K15.2 | TGFBR1   | 0.455204942 | 7.68E-24    |
| RP11-259K15.2 | TGFBI    | 0.379545113 | 1.72E-16    |
| RP11-259K15.2 | ERBB3    | 0.395477821 | 6.91E-18    |
| RP11-259K15.2 | CCL18    | 0.202040973 | 2.00E-05    |
| RP11-259K15.2 | CCL17    | 0.426906109 | 7.15E-21    |
| RP11-259K15.2 | C16orf45 | 0.536951996 | 3.75E-34    |
| RP11-259K15.2 | PRDM1    | 0.350510626 | 3.90E-14    |
| RP11-259K15.2 | TRIM47   | 0.471413168 | 1.14E-25    |
| RP11-259K15.2 | CNFN     | 0.50643141  | 5.66E-30    |
| RP11-259K15.2 | ARMCX3   | 0.46496894  | 6.23E-25    |
| RP11-259K15.2 | RAMP1    | 0.583753216 | 1.88E-41    |
| RP11-259K15.2 | GABRD    | 0.447970397 | 4.69E-23    |
| RP11-259K15.2 | COL13A1  | 0.603575381 | 6.44E-45    |
| RP11-259K15.2 | S100A5   | 0.580676484 | 6.16E-41    |
| RP11-259K15.2 | MISP     | 0.335608011 | 5.11E-13    |
| RP11-259K15.2 | HES6     | 0.31818885  | 8.73E-12    |
| RP11-259K15.2 | PSD3     | 0.271358838 | 7.55E-09    |
| RP11-259K15.2 | DOK7     | 0.461242382 | 1.64E-24    |
| RP11-259K15.2 | ZMAT3    | 0.179935655 | 0.000150464 |
| RP11-259K15.2 | MFAP2    | 0.571689825 | 1.85E-39    |
| RP11-259K15.2 | TMEM79   | 0.598910641 | 4.43E-44    |
| RP11-259K15.2 | SLC1A5   | 0.429162013 | 4.25E-21    |
| RP11-259K15.2 | BBC3     | 0.498418392 | 6.04E-29    |
| RP11-259K15.2 | HLA-DQB2 | 0.346224521 | 8.29E-14    |
| RP11-259K15.2 | C1QL1    | 0.539386276 | 1.67E-34    |
| RP11-259K15.2 | TMEM215  | 0.344058782 | 1.21E-13    |
| RP11-259K15.2 | PNP      | 0.414059195 | 1.30E-19    |
| RP11-259K15.2 | ARNTL    | 0.50537756  | 7.75E-30    |
| RP11-259K15.2 | CLDN2    | 0.500828896 | 2.98E-29    |
| RP11-259K15.2 | MVP      | 0.538469228 | 2.26E-34    |

|               |           |             |          |
|---------------|-----------|-------------|----------|
| RP11-259K15.2 | LGALS1    | 0.577357708 | 2.19E-40 |
| RP11-259K15.2 | BIRC7     | 0.430813799 | 2.89E-21 |
| RP11-259K15.2 | COL8A1    | 0.386661437 | 4.19E-17 |
| RP11-259K15.2 | PERP      | 0.278702952 | 2.83E-09 |
| RP11-259K15.2 | GJA4      | 0.44908779  | 3.56E-23 |
| RP11-259K15.2 | IGFL2     | 0.566902205 | 1.09E-38 |
| RP11-259K15.2 | DAPK2     | 0.4171216   | 6.57E-20 |
| RP11-259K15.2 | MAMLD1    | 0.50386742  | 1.22E-29 |
| RP11-259K15.2 | ETV5      | 0.385211223 | 5.60E-17 |
| RP11-259K15.2 | RUNX1     | 0.363013357 | 4.04E-15 |
| RP11-259K15.2 | LONRF2    | 0.392748094 | 1.21E-17 |
| RP11-259K15.2 | SPOCK1    | 0.352861577 | 2.56E-14 |
| RP11-259K15.2 | XKRX      | 0.452288274 | 1.60E-23 |
| RP11-259K15.2 | TGFB1     | 0.526464487 | 1.14E-32 |
| RP11-259K15.2 | ERP27     | 0.3208617   | 5.72E-12 |
| RP11-259K15.2 | TNFRSF10C | 0.229675527 | 1.15E-06 |
| RP11-259K15.2 | PALM      | 0.577082119 | 2.43E-40 |
| RP11-259K15.2 | TSC22D1   | 0.606082707 | 2.26E-45 |
| RP11-259K15.2 | TGM2      | 0.212971368 | 6.75E-06 |
| RP11-259K15.2 | UBE2QL1   | 0.49968209  | 4.18E-29 |
| RP11-259K15.2 | ECE1      | 0.584849758 | 1.22E-41 |
| RP11-259K15.2 | COL8A2    | 0.498907304 | 5.24E-29 |
| RP11-259K15.2 | HIST3H2A  | 0.337016525 | 4.03E-13 |
| RP11-259K15.2 | TNFRSF21  | 0.323247968 | 3.90E-12 |
| RP11-259K15.2 | SOX4      | 0.430434221 | 3.16E-21 |
| RP11-259K15.2 | ELF3      | 0.385042366 | 5.79E-17 |
| RP11-259K15.2 | TPD52L1   | 0.431354673 | 2.55E-21 |
| RP11-259K15.2 | INHBB     | 0.505789313 | 6.85E-30 |
| RP11-259K15.2 | HPN       | 0.426353567 | 8.12E-21 |
| RP11-259K15.2 | MMP7      | 0.240029831 | 3.59E-07 |
| RP11-259K15.2 | RAB27A    | 0.375868766 | 3.53E-16 |
| RP11-259K15.2 | IGF2BP2   | 0.493005532 | 2.89E-28 |
| RP11-259K15.2 | ITGB4     | 0.476410587 | 2.96E-26 |
| RP11-259K15.2 | PPP1R1B   | 0.661949731 | 1.11E-56 |
| RP11-259K15.2 | NPDC1     | 0.579837234 | 8.51E-41 |
| RP11-259K15.2 | CCL13     | 0.424602915 | 1.21E-20 |
| RP11-259K15.2 | SPINT1    | 0.454435405 | 9.33E-24 |
| RP11-259K15.2 | HEY2      | 0.565841384 | 1.60E-38 |
| RP11-259K15.2 | CST2      | 0.357447096 | 1.12E-14 |
| RP11-259K15.2 | ADM       | 0.267116914 | 1.31E-08 |
| RP11-259K15.2 | VSTM2L    | 0.276696949 | 3.71E-09 |
| RP11-259K15.2 | FAM84A    | 0.439280462 | 3.89E-22 |
| RP11-259K15.2 | P4HA2     | 0.440223253 | 3.10E-22 |
| RP11-259K15.2 | LPL       | 0.450714095 | 2.37E-23 |
| RP11-259K15.2 | TMEM173   | 0.535292359 | 6.49E-34 |
| RP11-259K15.2 | DHRS3     | 0.609966208 | 4.36E-46 |
| RP11-259K15.2 | SCN1B     | 0.510520149 | 1.65E-30 |
| RP11-259K15.2 | GLT1D1    | 0.338304335 | 3.24E-13 |
| RP11-259K15.2 | PHYHIP    | 0.523944325 | 2.55E-32 |
| RP11-259K15.2 | BHLHE40   | 0.331039153 | 1.10E-12 |
| RP11-259K15.2 | BID       | 0.62161983  | 2.74E-48 |

|               |            |             |          |
|---------------|------------|-------------|----------|
| RP11-259K15.2 | POSTN      | 0.231730038 | 9.18E-07 |
| RP11-259K15.2 | ITGA3      | 0.411138768 | 2.46E-19 |
| RP11-259K15.2 | RSPO4      | 0.527862434 | 7.29E-33 |
| RP11-259K15.2 | ADAMTS9    | 0.49190984  | 3.96E-28 |
| RP11-259K15.2 | ABTB2      | 0.415916907 | 8.60E-20 |
| RP11-259K15.2 | KCNQ3      | 0.349086368 | 5.01E-14 |
| RP11-259K15.2 | ANXA1      | 0.494934375 | 1.66E-28 |
| RP11-259K15.2 | S100A11    | 0.590666925 | 1.24E-42 |
| RP11-259K15.2 | CEACAM6    | 0.2959804   | 2.51E-10 |
| RP11-259K15.2 | IER5L      | 0.477561879 | 2.17E-26 |
| RP11-259K15.2 | KRT80      | 0.263204053 | 2.17E-08 |
| RP11-259K15.2 | CDH6       | 0.426779646 | 7.36E-21 |
| RP11-259K15.2 | UNC5B      | 0.302284794 | 9.97E-11 |
| RP11-259K15.2 | PLEKHN1    | 0.574651527 | 6.10E-40 |
| RP11-259K15.2 | SYTL1      | 0.589647329 | 1.85E-42 |
| RP11-259K15.2 | TMEM163    | 0.50143541  | 2.50E-29 |
| RP11-259K15.2 | C4orf48    | 0.491723821 | 4.17E-28 |
| RP11-259K15.2 | B3GNT7     | 0.533157143 | 1.31E-33 |
| RP11-259K15.2 | BAIAP3     | 0.575950116 | 3.74E-40 |
| RP11-259K15.2 | PHLDA2     | 0.537715434 | 2.91E-34 |
| RP11-259K15.2 | GAP43      | 0.576660798 | 2.86E-40 |
| RP11-259K15.2 | S100A1     | 0.325283473 | 2.81E-12 |
| RP11-259K15.2 | PTPRE      | 0.432440649 | 1.97E-21 |
| RP11-259K15.2 | CCND1      | 0.325016181 | 2.93E-12 |
| RP11-259K15.2 | ST6GALNAC5 | 0.338569385 | 3.10E-13 |
| RP11-259K15.2 | KRT17      | 0.390697838 | 1.85E-17 |
| RP11-259K15.2 | HPCAL4     | 0.590242123 | 1.46E-42 |
| RP11-259K15.2 | GABBR2     | 0.526261376 | 1.22E-32 |
| RP11-259K15.2 | DIRAS3     | 0.552580037 | 1.83E-36 |
| RP11-259K15.2 | SERINC2    | 0.317861632 | 9.19E-12 |
| RP11-259K15.2 | PTCHD4     | 0.310855232 | 2.73E-11 |
| RP11-259K15.2 | EPS8       | 0.344246814 | 1.17E-13 |
| RP11-259K15.2 | LY6E       | 0.606446023 | 1.94E-45 |
| RP11-259K15.2 | UPP1       | 0.438856369 | 4.31E-22 |
| RP11-259K15.2 | AHNAK2     | 0.284819253 | 1.23E-09 |
| RP11-259K15.2 | PLXNC1     | 0.458661088 | 3.19E-24 |
| RP11-259K15.2 | TNC        | 0.222903655 | 2.40E-06 |
| RP11-259K15.2 | DUSP4      | 0.442691219 | 1.71E-22 |
| RP11-259K15.2 | NRCAM      | 0.331495585 | 1.02E-12 |
| RP11-259K15.2 | NRP2       | 0.59670713  | 1.09E-43 |
| RP11-259K15.2 | CTSC       | 0.544169449 | 3.33E-35 |
| RP11-259K15.2 | AMIGO2     | 0.568648057 | 5.72E-39 |
| RP11-259K15.2 | NAB2       | 0.544984233 | 2.52E-35 |
| RP11-259K15.2 | TBC1D2     | 0.377335504 | 2.65E-16 |
| RP11-259K15.2 | PHLDA3     | 0.471303457 | 1.17E-25 |
| RP11-259K15.2 | PTP4A3     | 0.584512541 | 1.40E-41 |
| RP11-259K15.2 | CRABP2     | 0.545329677 | 2.24E-35 |
| RP11-259K15.2 | GOS2       | 0.494994302 | 1.63E-28 |
| RP11-259K15.2 | S100A6     | 0.538303136 | 2.39E-34 |
| RP11-259K15.2 | FOXQ1      | 0.365112759 | 2.73E-15 |
| RP11-259K15.2 | LRG1       | 0.534676715 | 7.94E-34 |



|               |         |             |          |
|---------------|---------|-------------|----------|
| RP11-259K15.2 | LAMP5   | 0.524084531 | 2.44E-32 |
| RP11-259K15.2 | ALDH3B1 | 0.418218072 | 5.15E-20 |
| RP11-259K15.2 | CDH2    | 0.292325061 | 4.26E-10 |
| RP11-259K15.2 | SCG5    | 0.525270218 | 1.67E-32 |
| RP11-259K15.2 | ZCCHC16 | 0.520018188 | 8.80E-32 |
| RP11-259K15.2 | GRB7    | 0.541999767 | 6.93E-35 |
| RP11-259K15.2 | TIAM1   | 0.439126639 | 4.04E-22 |
| RP11-259K15.2 | FXYD5   | 0.628035833 | 1.53E-49 |
| RP11-259K15.2 | CLDN9   | 0.447108099 | 5.80E-23 |
| RP11-259K15.2 | FAM43A  | 0.445690295 | 8.22E-23 |
| RP11-259K15.2 | CHST2   | 0.54302837  | 4.90E-35 |
| RP11-259K15.2 | HMGA2   | 0.568128508 | 6.93E-39 |
| RP11-259K15.2 | GALNT7  | 0.391436455 | 1.59E-17 |
| RP11-259K15.2 | CBLN1   | 0.425691471 | 9.46E-21 |
| RP11-259K15.2 | STRA6   | 0.551472076 | 2.70E-36 |
| RP11-259K15.2 | MUC21   | 0.377541004 | 2.55E-16 |
| RP11-259K15.2 | PRR36   | 0.622935015 | 1.52E-48 |
| RP11-259K15.2 | NFE2L3  | 0.468387499 | 2.54E-25 |
| RP11-259K15.2 | NR1D1   | 0.259958962 | 3.27E-08 |
| RP11-259K15.2 | MUC1    | 0.270842338 | 8.08E-09 |
| RP11-259K15.2 | NAT8L   | 0.518745781 | 1.31E-31 |
| RP11-259K15.2 | APOC1   | 0.501710928 | 2.30E-29 |
| RP11-259K15.2 | EVA1A   | 0.492803556 | 3.06E-28 |
| RP11-259K15.2 | ENTPD1  | 0.285739421 | 1.08E-09 |
| RP11-259K15.2 | COL1A1  | 0.398435196 | 3.73E-18 |
| RP11-259K15.2 | FNDC4   | 0.502355223 | 1.90E-29 |
| RP11-259K15.2 | FRMD3   | 0.370970278 | 9.04E-16 |
| RP11-259K15.2 | SHROOM4 | 0.487353606 | 1.44E-27 |
| RP11-259K15.2 | NELL2   | 0.48272085  | 5.25E-27 |
| RP11-259K15.2 | EPHB3   | 0.500479427 | 3.31E-29 |
| RP11-259K15.2 | TMC6    | 0.504091381 | 1.14E-29 |
| RP11-259K15.2 | NOD1    | 0.583054668 | 2.46E-41 |
| RP11-259K15.2 | GGCT    | 0.618981589 | 8.80E-48 |
| RP11-259K15.2 | ICAM1   | 0.372700053 | 6.50E-16 |
| RP11-259K15.2 | PRSS23  | 0.492948443 | 2.94E-28 |
| RP11-259K15.2 | CFI     | 0.564236851 | 2.88E-38 |
| RP11-259K15.2 | CD55    | 0.335618081 | 5.11E-13 |
| RP11-259K15.2 | RASD2   | 0.537444313 | 3.18E-34 |
| RP11-259K15.2 | KLK11   | 0.500595869 | 3.20E-29 |
| RP11-259K15.2 | ICAM5   | 0.589058421 | 2.34E-42 |
| RP11-259K15.2 | ADORA1  | 0.494716513 | 1.77E-28 |
| RP11-259K15.2 | ITGA2   | 0.337032127 | 4.02E-13 |
| RP11-259K15.2 | ABCC3   | 0.428127524 | 5.40E-21 |
| RP11-259K15.2 | MFGE8   | 0.501250383 | 2.64E-29 |
| RP11-259K15.2 | STK32A  | 0.297144262 | 2.12E-10 |
| RP11-259K15.2 | CYSLTR2 | 0.529344632 | 4.52E-33 |
| RP11-259K15.2 | LAD1    | 0.459980315 | 2.27E-24 |
| RP11-259K15.2 | MGAT3   | 0.343705068 | 1.28E-13 |
| RP11-259K15.2 | IGFBP6  | 0.701145502 | 3.46E-66 |
| RP11-259K15.2 | CYP2S1  | 0.40260152  | 1.55E-18 |
| RP11-259K15.2 | KCNJ2   | 0.60231069  | 1.09E-44 |

|               |           |             |          |
|---------------|-----------|-------------|----------|
| RP11-259K15.2 | FAM20A    | 0.578276884 | 1.54E-40 |
| RP11-259K15.2 | TGFA      | 0.493163751 | 2.76E-28 |
| RP11-259K15.2 | MXRA8     | 0.690926632 | 1.46E-63 |
| RP11-259K15.2 | C8orf4    | 0.370251944 | 1.04E-15 |
| RP11-259K15.2 | CLDN10    | 0.581784296 | 4.02E-41 |
| RP11-259K15.2 | PDE5A     | 0.391653679 | 1.52E-17 |
| RP11-259K15.2 | APOE      | 0.524656844 | 2.03E-32 |
| RP11-259K15.2 | SPOCK2    | 0.289813338 | 6.08E-10 |
| RP11-259K15.2 | TENM1     | 0.534953794 | 7.25E-34 |
| RP11-259K15.2 | SLIT1     | 0.507360727 | 4.28E-30 |
| RP11-259K15.2 | CXCL14    | 0.508185226 | 3.34E-30 |
| RP11-259K15.2 | ECM1      | 0.47285012  | 7.74E-26 |
| RP11-259K15.2 | DUSP5     | 0.392429812 | 1.30E-17 |
| RP11-259K15.2 | SEZ6L2    | 0.406470766 | 6.78E-19 |
| RP11-259K15.2 | THRSP     | 0.214261235 | 5.92E-06 |
| RP11-259K15.2 | C19orf33  | 0.4612399   | 1.64E-24 |
| RP11-259K15.2 | MPZL2     | 0.486894763 | 1.64E-27 |
| RP11-259K15.2 | CTSH      | 0.587011427 | 5.25E-42 |
| RP11-259K15.2 | CYP1B1    | 0.389300884 | 2.45E-17 |
| RP11-259K15.2 | ALOX5     | 0.307327033 | 4.68E-11 |
| RP11-259K15.2 | SYTL5     | 0.493180648 | 2.75E-28 |
| RP11-259K15.2 | TNFRSF12A | 0.566320084 | 1.35E-38 |
| RP11-259K15.2 | DUSP6     | 0.506746785 | 5.15E-30 |
| RP11-259K15.2 | ALOX15B   | 0.385588085 | 5.19E-17 |
| RP11-259K15.2 | SDC4      | 0.661722933 | 1.25E-56 |
| RP11-259K15.2 | MDK       | 0.69824011  | 1.98E-65 |
| RP11-259K15.2 | KRT19     | 0.431693877 | 2.35E-21 |
| RP11-259K15.2 | MET       | 0.360538795 | 6.37E-15 |
| RP11-259K15.2 | TESC      | 0.630233174 | 5.61E-50 |
| RP11-259K15.2 | CXCL17    | 0.372431569 | 6.84E-16 |
| RP11-259K15.2 | NPC2      | 0.714966467 | 6.40E-70 |
| RP11-259K15.2 | COMP      | 0.470854897 | 1.32E-25 |
| RP11-259K15.2 | TUSC3     | 0.596770461 | 1.06E-43 |
| RP11-259K15.2 | TMPRSS4   | 0.453067173 | 1.32E-23 |
| RP11-259K15.2 | LGALS3    | 0.509732031 | 2.09E-30 |
| RP11-259K15.2 | CRLF1     | 0.380477409 | 1.43E-16 |
| RP11-259K15.2 | CTXN1     | 0.623775826 | 1.05E-48 |
| RP11-259K15.2 | PCSK1N    | 0.467340315 | 3.35E-25 |
| RP11-259K15.2 | NMU       | 0.346563135 | 7.81E-14 |
| RP11-259K15.2 | GALE      | 0.63980328  | 6.46E-52 |
| RP11-259K15.2 | PCSK2     | 0.277363016 | 3.40E-09 |
| RP11-259K15.2 | GJB3      | 0.595292305 | 1.93E-43 |
| RP11-259K15.2 | SLPI      | 0.298791842 | 1.67E-10 |
| RP11-259K15.2 | AGR2      | 0.28050634  | 2.22E-09 |
| RP11-259K15.2 | MRC2      | 0.524385438 | 2.22E-32 |
| RP11-259K15.2 | GOLT1A    | 0.676963901 | 3.80E-60 |
| RP11-259K15.2 | SLC27A6   | 0.402313711 | 1.65E-18 |
| RP11-259K15.2 | KCNN4     | 0.568805354 | 5.40E-39 |
| RP11-259K15.2 | ETV4      | 0.548228351 | 8.30E-36 |
| RP11-259K15.2 | SYT12     | 0.624687626 | 6.96E-49 |
| RP11-259K15.2 | PVRL4     | 0.528709485 | 5.55E-33 |

|               |          |              |          |
|---------------|----------|--------------|----------|
| RP11-259K15.2 | PLCD3    | 0.423303217  | 1.63E-20 |
| RP11-259K15.2 | PLAU     | 0.472931109  | 7.57E-26 |
| RP11-259K15.2 | LRRK2    | 0.396339694  | 5.78E-18 |
| RP11-259K15.2 | SFN      | 0.462012061  | 1.35E-24 |
| RP11-259K15.2 | LPAR5    | 0.464167631  | 7.69E-25 |
| RP11-259K15.2 | NGEF     | 0.467996383  | 2.82E-25 |
| RP11-259K15.2 | DTX4     | 0.440001845  | 3.27E-22 |
| RP11-259K15.2 | CST6     | 0.669821337  | 1.80E-58 |
| RP11-259K15.2 | QPCT     | 0.613416254  | 9.94E-47 |
| RP11-259K15.2 | TIMP1    | 0.735149608  | 8.61E-76 |
| RP11-259K15.2 | CAMK2N1  | 0.59913829   | 4.03E-44 |
| RP11-259K15.2 | KLHDC8A  | 0.490945277  | 5.21E-28 |
| RP11-259K15.2 | PDLIM4   | 0.578195611  | 1.59E-40 |
| RP11-259K15.2 | SCEL     | 0.347913163  | 6.17E-14 |
| RP11-259K15.2 | LCN2     | 0.303760113  | 8.00E-11 |
| RP11-259K15.2 | PROS1    | 0.316822179  | 1.08E-11 |
| RP11-259K15.2 | GABRB2   | 0.46865245   | 2.37E-25 |
| RP11-259K15.2 | TMPRSS6  | 0.521527349  | 5.48E-32 |
| RP11-259K15.2 | KLK7     | 0.437939268  | 5.37E-22 |
| RP11-259K15.2 | PDZK1IP1 | 0.401780567  | 1.85E-18 |
| RP11-259K15.2 | CDH3     | 0.567803771  | 7.81E-39 |
| RP11-259K15.2 | LRP4     | 0.512740255  | 8.38E-31 |
| RP11-259K15.2 | IGSF1    | 0.411403153  | 2.33E-19 |
| RP11-259K15.2 | B3GNT3   | 0.302189409  | 1.01E-10 |
| RP11-259K15.2 | CLDN1    | 0.327762857  | 1.88E-12 |
| RP11-259K15.2 | GDF15    | 0.273537882  | 5.66E-09 |
| RP11-259K15.2 | ARHGAP36 | 0.402766701  | 1.50E-18 |
| RP11-259K15.2 | LAMB3    | 0.452140126  | 1.66E-23 |
| RP11-259K15.2 | KLK10    | 0.586561378  | 6.26E-42 |
| RP11-259K15.2 | DPP4     | 0.307222925  | 4.75E-11 |
| RP11-259K15.2 | METTL7B  | 0.594210229  | 2.99E-43 |
| RP11-259K15.2 | LIPH     | 0.501022734  | 2.82E-29 |
| RP11-259K15.2 | CLDN16   | 0.299168987  | 1.58E-10 |
| RP11-259K15.2 | CHI3L1   | 0.426245487  | 8.33E-21 |
| RP11-259K15.2 | SLC22A31 | 0.720164947  | 2.20E-71 |
| RP11-259K15.2 | TACSTD2  | 0.523485624  | 2.95E-32 |
| RP11-259K15.2 | SFTPB    | 0.462847127  | 1.08E-24 |
| RP11-259K15.2 | RXRG     | 0.660899285  | 1.91E-56 |
| RP11-259K15.2 | DCSTAMP  | 0.447495196  | 5.27E-23 |
| RP11-259K15.2 | CITED1   | 0.559991027  | 1.33E-37 |
| RP11-259K15.2 | SERPINA1 | 0.600838279  | 2.00E-44 |
| RP11-259K15.2 | PRR15    | 0.663855951  | 4.15E-57 |
| RP11-259K15.2 | SLC34A2  | 0.250408996  | 1.06E-07 |
| RP11-259K15.2 | FN1      | 0.323020674  | 4.05E-12 |
| RP11-259K15.2 | ZCCHC12  | 0.533752292  | 1.08E-33 |
| RP11-20J15.3  | TFF3     | -0.405334951 | 8.65E-19 |
| RP11-20J15.3  | CCL21    | -0.200424308 | 2.33E-05 |
| RP11-20J15.3  | TPO      | -0.515720699 | 3.35E-31 |
| RP11-20J15.3  | MT1G     | -0.529111976 | 4.87E-33 |
| RP11-20J15.3  | DIO1     | -0.487777415 | 1.28E-27 |
| RP11-20J15.3  | DPT      | -0.203203447 | 1.78E-05 |

|              |           |              |             |
|--------------|-----------|--------------|-------------|
| RP11-20J15.3 | CDH16     | -0.463407951 | 9.37E-25    |
| RP11-20J15.3 | CRABP1    | -0.370946601 | 9.09E-16    |
| RP11-20J15.3 | SLC26A7   | -0.467047868 | 3.61E-25    |
| RP11-20J15.3 | MT1H      | -0.517322407 | 2.04E-31    |
| RP11-20J15.3 | SLC26A4   | -0.410992868 | 2.54E-19    |
| RP11-20J15.3 | SLC5A8    | -0.576685082 | 2.83E-40    |
| RP11-20J15.3 | PKHD1L1   | -0.442957911 | 1.60E-22    |
| RP11-20J15.3 | TFCP2L1   | -0.574338073 | 6.87E-40    |
| RP11-20J15.3 | WSCD2     | -0.43997201  | 3.30E-22    |
| RP11-20J15.3 | IPCEF1    | -0.415426297 | 9.58E-20    |
| RP11-20J15.3 | SLC5A5    | -0.346706571 | 7.62E-14    |
| RP11-20J15.3 | MT1F      | -0.512175956 | 9.95E-31    |
| RP11-20J15.3 | FOSB      | -0.161098989 | 0.000704223 |
| RP11-20J15.3 | SEMA3D    | -0.47461182  | 4.82E-26    |
| RP11-20J15.3 | BMP8A     | -0.428840338 | 4.57E-21    |
| RP11-20J15.3 | MATN2     | -0.512435235 | 9.19E-31    |
| RP11-20J15.3 | PLA2R1    | -0.430454596 | 3.14E-21    |
| RP11-20J15.3 | COL23A1   | -0.482848404 | 5.07E-27    |
| RP11-20J15.3 | HGD       | -0.569525866 | 4.14E-39    |
| RP11-20J15.3 | TCEAL2    | -0.368435451 | 1.46E-15    |
| RP11-20J15.3 | CHRD1     | -0.166411855 | 0.000463137 |
| RP11-20J15.3 | TNFRSF11B | -0.479377629 | 1.32E-26    |
| RP11-20J15.3 | FAM167A   | -0.480091287 | 1.08E-26    |
| RP11-20J15.3 | KIT       | -0.366441848 | 2.13E-15    |
| RP11-20J15.3 | SLC4A4    | -0.583871996 | 1.79E-41    |
| RP11-20J15.3 | SMOC2     | -0.22856308  | 1.30E-06    |
| RP11-20J15.3 | FHL1      | -0.48815591  | 1.15E-27    |
| RP11-20J15.3 | OTOS      | -0.549018792 | 6.32E-36    |
| RP11-20J15.3 | IGFBPL1   | -0.528983333 | 5.08E-33    |
| RP11-20J15.3 | HBB       | -0.246361688 | 1.71E-07    |
| RP11-20J15.3 | BEX1      | -0.279405465 | 2.58E-09    |
| RP11-20J15.3 | FABP4     | -0.386115324 | 4.67E-17    |
| RP11-20J15.3 | LMOD1     | -0.35727096  | 1.16E-14    |
| RP11-20J15.3 | SOD3      | -0.519829532 | 9.33E-32    |
| RP11-20J15.3 | TMEM171   | -0.475018949 | 4.32E-26    |
| RP11-20J15.3 | PI16      | -0.16027874  | 0.000750448 |
| RP11-20J15.3 | ZMAT4     | -0.521046736 | 6.37E-32    |
| RP11-20J15.3 | MFAP4     | -0.071164999 | 0.136563985 |
| RP11-20J15.3 | CWH43     | -0.528056649 | 6.85E-33    |
| RP11-20J15.3 | SPX       | -0.482800959 | 5.13E-27    |
| RP11-20J15.3 | APOD      | -0.015078368 | 0.752728198 |
| RP11-20J15.3 | DPP6      | -0.423397661 | 1.60E-20    |
| RP11-20J15.3 | MMRN1     | -0.286534525 | 9.65E-10    |
| RP11-20J15.3 | WDR72     | -0.465066321 | 6.08E-25    |
| RP11-20J15.3 | MPPED2    | -0.490077956 | 6.67E-28    |
| RP11-20J15.3 | PAPSS2    | -0.378377087 | 2.16E-16    |
| RP11-20J15.3 | DCN       | -0.087919111 | 0.065706141 |
| RP11-20J15.3 | SORBS2    | -0.538763127 | 2.05E-34    |
| RP11-20J15.3 | EGR2      | -0.069480956 | 0.146114392 |
| RP11-20J15.3 | EDN3      | -0.263662017 | 2.05E-08    |
| RP11-20J15.3 | DIO2      | -0.488046553 | 1.18E-27    |

|              |            |              |             |
|--------------|------------|--------------|-------------|
| RP11-20J15.3 | ITPR1      | -0.513973681 | 5.74E-31    |
| RP11-20J15.3 | CFD        | -0.197558011 | 3.06E-05    |
| RP11-20J15.3 | CPXM1      | -0.248401389 | 1.34E-07    |
| RP11-20J15.3 | ELMO1      | -0.499728894 | 4.12E-29    |
| RP11-20J15.3 | GPC3       | -0.292009906 | 4.45E-10    |
| RP11-20J15.3 | MYOC       | 0.070548147  | 0.140004914 |
| RP11-20J15.3 | DEPTOR     | -0.483274344 | 4.50E-27    |
| RP11-20J15.3 | DGKI       | -0.428191075 | 5.32E-21    |
| RP11-20J15.3 | CARTPT     | -0.420836769 | 2.86E-20    |
| RP11-20J15.3 | IYD        | -0.536465919 | 4.40E-34    |
| RP11-20J15.3 | LYVE1      | -0.213675697 | 6.29E-06    |
| RP11-20J15.3 | CLCNKB     | -0.371403694 | 8.33E-16    |
| RP11-20J15.3 | NCAM1      | -0.610624763 | 3.29E-46    |
| RP11-20J15.3 | HBA2       | -0.183993905 | 0.000105639 |
| RP11-20J15.3 | GLT8D2     | -0.357957172 | 1.02E-14    |
| RP11-20J15.3 | OGDHL      | -0.644510419 | 6.77E-53    |
| RP11-20J15.3 | LIFR       | -0.404228757 | 1.10E-18    |
| RP11-20J15.3 | CSGALNACT1 | -0.397595137 | 4.45E-18    |
| RP11-20J15.3 | RAP1GAP    | -0.522695935 | 3.79E-32    |
| RP11-20J15.3 | COL9A3     | -0.370003895 | 1.09E-15    |
| RP11-20J15.3 | FBLN1      | -0.141775482 | 0.002909809 |
| RP11-20J15.3 | EFEMP1     | -0.287053084 | 8.97E-10    |
| RP11-20J15.3 | AOX1       | -0.400126463 | 2.62E-18    |
| RP11-20J15.3 | GRIN2C     | -0.490961606 | 5.19E-28    |
| RP11-20J15.3 | C11orf74   | -0.414040753 | 1.30E-19    |
| RP11-20J15.3 | PPARGC1A   | -0.672208961 | 5.01E-59    |
| RP11-20J15.3 | ANGPTL1    | -0.279923599 | 2.40E-09    |
| RP11-20J15.3 | SCARA5     | -0.180713331 | 0.000140687 |
| RP11-20J15.3 | LTF        | -0.380190201 | 1.52E-16    |
| RP11-20J15.3 | CA4        | -0.278557231 | 2.89E-09    |
| RP11-20J15.3 | TG         | -0.374607388 | 4.50E-16    |
| RP11-20J15.3 | FCGBP      | -0.413430707 | 1.49E-19    |
| RP11-20J15.3 | PBX4       | -0.305653147 | 6.02E-11    |
| RP11-20J15.3 | CYR61      | -0.197612264 | 3.05E-05    |
| RP11-20J15.3 | FOS        | -0.224121141 | 2.11E-06    |
| RP11-20J15.3 | KHDRBS2    | -0.376173137 | 3.33E-16    |
| RP11-20J15.3 | MUM1L1     | -0.473110306 | 7.22E-26    |
| RP11-20J15.3 | RGS16      | -0.458185478 | 3.60E-24    |
| RP11-20J15.3 | MT1M       | -0.44178674  | 2.13E-22    |
| RP11-20J15.3 | LRP2       | -0.495503542 | 1.41E-28    |
| RP11-20J15.3 | MAFB       | -0.432858395 | 1.79E-21    |
| RP11-20J15.3 | KCNK2      | -0.401434265 | 1.99E-18    |
| RP11-20J15.3 | TBC1D4     | -0.402195864 | 1.69E-18    |
| RP11-20J15.3 | MIOX       | -0.401726608 | 1.87E-18    |
| RP11-20J15.3 | TPPP       | -0.426083079 | 8.64E-21    |
| RP11-20J15.3 | FMOD       | -0.536908312 | 3.80E-34    |
| RP11-20J15.3 | CITED2     | -0.408690128 | 4.20E-19    |
| RP11-20J15.3 | RGS8       | -0.433190451 | 1.66E-21    |
| RP11-20J15.3 | ABI3BP     | -0.349725393 | 4.48E-14    |
| RP11-20J15.3 | ADH1B      | -0.217333988 | 4.31E-06    |
| RP11-20J15.3 | OGN        | -0.184555747 | 0.000100531 |

|              |          |              |             |
|--------------|----------|--------------|-------------|
| RP11-20J15.3 | NR4A1    | -0.126981711 | 0.007727092 |
| RP11-20J15.3 | FOXJ1    | -0.309020764 | 3.62E-11    |
| RP11-20J15.3 | ALDH1A1  | -0.452900028 | 1.37E-23    |
| RP11-20J15.3 | OCA2     | -0.253651142 | 7.13E-08    |
| RP11-20J15.3 | TMEM139  | -0.226176657 | 1.69E-06    |
| RP11-20J15.3 | ARHGAP24 | -0.575352002 | 4.69E-40    |
| RP11-20J15.3 | SLC25A15 | -0.591777689 | 7.94E-43    |
| RP11-20J15.3 | DES      | -0.162680275 | 0.000622465 |
| RP11-20J15.3 | GDF10    | -0.273314169 | 5.83E-09    |
| RP11-20J15.3 | KIAA1324 | -0.477900032 | 1.97E-26    |
| RP11-20J15.3 | JUN      | -0.232212287 | 8.70E-07    |
| RP11-20J15.3 | C7       | 0.006681277  | 0.888983359 |
| RP11-20J15.3 | LGI3     | -0.58305976  | 2.46E-41    |
| RP11-20J15.3 | CDON     | -0.540198669 | 1.27E-34    |
| RP11-20J15.3 | BCL2     | -0.540341854 | 1.21E-34    |
| RP11-20J15.3 | HLF      | -0.449305357 | 3.37E-23    |
| RP11-20J15.3 | EGR1     | -0.206032688 | 1.35E-05    |
| RP11-20J15.3 | IP6K3    | -0.480678283 | 9.22E-27    |
| RP11-20J15.3 | SCUBE3   | -0.390446859 | 1.94E-17    |
| RP11-20J15.3 | PKNOX2   | -0.292161307 | 4.36E-10    |
| RP11-20J15.3 | SMAD9    | -0.439263939 | 3.91E-22    |
| RP11-20J15.3 | IQGAP2   | -0.597646589 | 7.42E-44    |
| RP11-20J15.3 | GNA14    | -0.509576562 | 2.19E-30    |
| RP11-20J15.3 | LAYN     | -0.236939463 | 5.11E-07    |
| RP11-20J15.3 | AVPR1A   | -0.391362919 | 1.61E-17    |
| RP11-20J15.3 | PDLIM3   | -0.46637428  | 4.31E-25    |
| RP11-20J15.3 | GPM6A    | -0.42833036  | 5.15E-21    |
| RP11-20J15.3 | SDPR     | -0.17572305  | 0.00021548  |
| RP11-20J15.3 | CRYAB    | -0.338418709 | 3.18E-13    |
| RP11-20J15.3 | FOXA2    | -0.236818662 | 5.19E-07    |
| RP11-20J15.3 | C8orf88  | -0.378148444 | 2.26E-16    |
| RP11-20J15.3 | ISM1     | -0.375664932 | 3.67E-16    |
| RP11-20J15.3 | BMP2     | -0.238023034 | 4.52E-07    |
| RP11-20J15.3 | ID4      | -0.384019188 | 7.10E-17    |
| RP11-20J15.3 | NUPR1    | -0.537010577 | 3.67E-34    |
| RP11-20J15.3 | SERTM1   | -0.621002644 | 3.60E-48    |
| RP11-20J15.3 | IRS1     | -0.460158444 | 2.17E-24    |
| RP11-20J15.3 | FIBIN    | -0.381352847 | 1.21E-16    |
| RP11-20J15.3 | PODN     | -0.112409705 | 0.018472848 |
| RP11-20J15.3 | TDRD9    | -0.453028533 | 1.33E-23    |
| RP11-20J15.3 | EPHA3    | -0.250541014 | 1.04E-07    |
| RP11-20J15.3 | AIF1L    | -0.318141412 | 8.80E-12    |
| RP11-20J15.3 | EBF4     | -0.480962952 | 8.53E-27    |
| RP11-20J15.3 | ADM2     | -0.60102524  | 1.86E-44    |
| RP11-20J15.3 | GSTM3    | -0.490403616 | 6.08E-28    |
| RP11-20J15.3 | HSD17B6  | -0.185384839 | 9.34E-05    |
| RP11-20J15.3 | AGR3     | -0.188950478 | 6.79E-05    |
| RP11-20J15.3 | EPHB1    | -0.456110956 | 6.11E-24    |
| RP11-20J15.3 | TMOD1    | -0.33481177  | 5.85E-13    |
| RP11-20J15.3 | WASF3    | -0.541639175 | 7.82E-35    |
| RP11-20J15.3 | SELV     | -0.521414662 | 5.67E-32    |

|              |          |              |             |
|--------------|----------|--------------|-------------|
| RP11-20J15.3 | ENPP1    | -0.403152916 | 1.38E-18    |
| RP11-20J15.3 | SYNE1    | -0.486190336 | 2.00E-27    |
| RP11-20J15.3 | PLCH1    | -0.398451413 | 3.72E-18    |
| RP11-20J15.3 | CCDC146  | -0.371901829 | 7.57E-16    |
| RP11-20J15.3 | SLC16A2  | -0.380060561 | 1.56E-16    |
| RP11-20J15.3 | IER2     | -0.285228977 | 1.16E-09    |
| RP11-20J15.3 | KCNAB1   | -0.304512486 | 7.15E-11    |
| RP11-20J15.3 | SYNDIG1  | -0.434150113 | 1.32E-21    |
| RP11-20J15.3 | C16orf89 | -0.409319534 | 3.66E-19    |
| RP11-20J15.3 | CTGF     | -0.087624443 | 0.066619725 |
| RP11-20J15.3 | NR4A3    | -0.089933636 | 0.059732461 |
| RP11-20J15.3 | KIAA1456 | -0.529768969 | 3.94E-33    |
| RP11-20J15.3 | AQP4     | -0.402035162 | 1.75E-18    |
| RP11-20J15.3 | RNF150   | -0.39927457  | 3.13E-18    |
| RP11-20J15.3 | C1S      | -0.07488789  | 0.117160818 |
| RP11-20J15.3 | PFKFB2   | -0.634603392 | 7.45E-51    |
| RP11-20J15.3 | PROX1    | -0.364591997 | 3.01E-15    |
| RP11-20J15.3 | TCF7L1   | -0.40536034  | 8.61E-19    |
| RP11-20J15.3 | HSPB6    | -0.128100033 | 0.0072006   |
| RP11-20J15.3 | FHDC1    | -0.323180773 | 3.94E-12    |
| RP11-20J15.3 | PRR15L   | -0.50490215  | 8.93E-30    |
| RP11-20J15.3 | SLC1A1   | -0.51322584  | 7.22E-31    |
| RP11-20J15.3 | BTBD11   | -0.401703119 | 1.88E-18    |
| RP11-20J15.3 | TRIM58   | -0.54887284  | 6.64E-36    |
| RP11-20J15.3 | LRIG1    | -0.448499931 | 4.11E-23    |
| RP11-20J15.3 | ROR2     | -0.30173381  | 1.08E-10    |
| RP11-20J15.3 | GPR125   | -0.474982638 | 4.36E-26    |
| RP11-20J15.3 | FLRT1    | -0.433613682 | 1.50E-21    |
| RP11-20J15.3 | PGF      | -0.367382659 | 1.78E-15    |
| RP11-20J15.3 | DUSP1    | -0.179364527 | 0.000158047 |
| RP11-20J15.3 | PLA2G7   | -0.228382521 | 1.33E-06    |
| RP11-20J15.3 | PLSCR4   | -0.336677577 | 4.27E-13    |
| RP11-20J15.3 | FAM46B   | -0.456527959 | 5.49E-24    |
| RP11-20J15.3 | GLDC     | -0.400979604 | 2.19E-18    |
| RP11-20J15.3 | ZBTB16   | -0.398634384 | 3.58E-18    |
| RP11-20J15.3 | OMD      | -0.128502541 | 0.007019106 |
| RP11-20J15.3 | HSD11B2  | -0.278159489 | 3.05E-09    |
| RP11-20J15.3 | FGL2     | -0.142586936 | 0.002750538 |
| RP11-20J15.3 | CLCNKA   | -0.488832352 | 9.49E-28    |
| RP11-20J15.3 | GATM     | -0.488043007 | 1.19E-27    |
| RP11-20J15.3 | TNS3     | -0.379400306 | 1.77E-16    |
| RP11-20J15.3 | TOB1     | -0.275122597 | 4.59E-09    |
| RP11-20J15.3 | MARC2    | -0.506121531 | 6.21E-30    |
| RP11-20J15.3 | LRRC2    | -0.591147999 | 1.02E-42    |
| RP11-20J15.3 | SORD     | -0.214554454 | 5.75E-06    |
| RP11-20J15.3 | RIMS4    | -0.315634213 | 1.30E-11    |
| RP11-20J15.3 | SLC29A4  | -0.385332466 | 5.46E-17    |
| RP11-20J15.3 | SLC39A14 | -0.588859231 | 2.53E-42    |
| RP11-20J15.3 | FAXDC2   | -0.475737713 | 3.55E-26    |
| RP11-20J15.3 | HSPB8    | -0.394324567 | 8.78E-18    |
| RP11-20J15.3 | CCL19    | 0.06507331   | 0.173515969 |

|              |          |              |             |
|--------------|----------|--------------|-------------|
| RP11-20J15.3 | KCNIP3   | -0.398029303 | 4.06E-18    |
| RP11-20J15.3 | CGNL1    | -0.459594354 | 2.51E-24    |
| RP11-20J15.3 | ATF3     | 0.004653987  | 0.922540275 |
| RP11-20J15.3 | SGCD     | -0.411483556 | 2.28E-19    |
| RP11-20J15.3 | STARD13  | -0.415467572 | 9.50E-20    |
| RP11-20J15.3 | LDHD     | -0.530746303 | 2.87E-33    |
| RP11-20J15.3 | RCAN1    | -0.277514339 | 3.33E-09    |
| RP11-20J15.3 | ID3      | -0.429873344 | 3.60E-21    |
| RP11-20J15.3 | SYTL3    | -0.456990918 | 4.88E-24    |
| RP11-20J15.3 | MT1E     | -0.435740613 | 9.06E-22    |
| RP11-20J15.3 | CAMK1D   | -0.366738218 | 2.01E-15    |
| RP11-20J15.3 | PRKCQ    | -0.434350814 | 1.26E-21    |
| RP11-20J15.3 | NUAK2    | -0.436167404 | 8.19E-22    |
| RP11-20J15.3 | LIPG     | -0.346323693 | 8.15E-14    |
| RP11-20J15.3 | SLC25A25 | -0.370652875 | 9.61E-16    |
| RP11-20J15.3 | PRKX     | -0.187618007 | 7.65E-05    |
| RP11-20J15.3 | SRPX     | -0.0924297   | 0.052960825 |
| RP11-20J15.3 | FAM189A1 | -0.319767442 | 6.80E-12    |
| RP11-20J15.3 | PLEKHH1  | -0.354652418 | 1.86E-14    |
| RP11-20J15.3 | WNT11    | -0.334037263 | 6.65E-13    |
| RP11-20J15.3 | SNAI1    | -0.282298747 | 1.74E-09    |
| RP11-20J15.3 | FDCSP    | -0.003184094 | 0.946960535 |
| RP11-20J15.3 | MT1X     | -0.365717978 | 2.44E-15    |
| RP11-20J15.3 | ACACB    | -0.54326861  | 4.51E-35    |
| RP11-20J15.3 | ARC      | 0.053009314  | 0.267740402 |
| RP11-20J15.3 | KLK4     | -0.372155147 | 7.21E-16    |
| RP11-20J15.3 | ZFPM2    | -0.192417023 | 4.95E-05    |
| RP11-20J15.3 | AKAP12   | -0.23203577  | 8.88E-07    |
| RP11-20J15.3 | GJB6     | -0.287647071 | 8.26E-10    |
| RP11-20J15.3 | ERO1LB   | -0.437515715 | 5.94E-22    |
| RP11-20J15.3 | DNALI1   | -0.246642172 | 1.66E-07    |
| RP11-20J15.3 | HKDC1    | -0.478780137 | 1.55E-26    |
| RP11-20J15.3 | ZFP36L2  | -0.365345227 | 2.62E-15    |
| RP11-20J15.3 | CAPSL    | -0.402853074 | 1.47E-18    |
| RP11-20J15.3 | CYP7B1   | -0.445443748 | 8.73E-23    |
| RP11-20J15.3 | CPQ      | -0.284917572 | 1.21E-09    |
| RP11-20J15.3 | RPS6KA6  | -0.365801178 | 2.40E-15    |
| RP11-20J15.3 | TLE1     | -0.506642502 | 5.31E-30    |
| RP11-20J15.3 | TP53INP2 | -0.389423356 | 2.39E-17    |
| RP11-20J15.3 | KATNAL2  | -0.508921271 | 2.67E-30    |
| RP11-20J15.3 | SGPP2    | -0.355995269 | 1.46E-14    |
| RP11-20J15.3 | CTH      | -0.508008118 | 3.52E-30    |
| RP11-20J15.3 | KIF12    | -0.19172372  | 5.27E-05    |
| RP11-20J15.3 | TMEM220  | -0.471372153 | 1.15E-25    |
| RP11-20J15.3 | CENPJ    | -0.430623738 | 3.02E-21    |
| RP11-20J15.3 | FAM155B  | -0.204401693 | 1.59E-05    |
| RP11-20J15.3 | WFS1     | -0.5019071   | 2.17E-29    |
| RP11-20J15.3 | SELENBP1 | -0.317207267 | 1.02E-11    |
| RP11-20J15.3 | SNTA1    | -0.575759006 | 4.02E-40    |
| RP11-20J15.3 | FRAS1    | -0.370245729 | 1.04E-15    |
| RP11-20J15.3 | FBLN7    | -0.555232571 | 7.23E-37    |



|              |          |              |             |
|--------------|----------|--------------|-------------|
| RP11-20J15.3 | AGPAT9   | -0.410090849 | 3.10E-19    |
| RP11-20J15.3 | GPR83    | -0.279252776 | 2.63E-09    |
| RP11-20J15.3 | PRTG     | -0.43603982  | 8.44E-22    |
| RP11-20J15.3 | EGR3     | 0.075569847  | 0.113852583 |
| RP11-20J15.3 | GRAMD2   | -0.335173173 | 5.50E-13    |
| RP11-20J15.3 | HYOU1    | -0.514606846 | 4.72E-31    |
| RP11-20J15.3 | FBLN5    | -0.133045568 | 0.005236896 |
| RP11-20J15.3 | ITM2A    | -0.260947736 | 2.88E-08    |
| RP11-20J15.3 | SRF      | -0.223272241 | 2.31E-06    |
| RP11-20J15.3 | FGFR2    | -0.192406173 | 4.95E-05    |
| RP11-20J15.3 | MT1A     | -0.216517996 | 4.69E-06    |
| RP11-20J15.3 | MAMDC2   | -0.109203103 | 0.022115216 |
| RP11-20J15.3 | FHL2     | -0.350196579 | 4.12E-14    |
| RP11-20J15.3 | FTCDNL1  | -0.5672666   | 9.52E-39    |
| RP11-20J15.3 | PKIA     | -0.073647021 | 0.123372794 |
| RP11-20J15.3 | DNAJB4   | -0.23633807  | 5.48E-07    |
| RP11-20J15.3 | SLC25A33 | -0.47255494  | 8.37E-26    |
| RP11-20J15.3 | EYA2     | -0.393143269 | 1.12E-17    |
| RP11-20J15.3 | LPAR1    | -0.353583314 | 2.25E-14    |
| RP11-20J15.3 | STX11    | -0.371931402 | 7.53E-16    |
| RP11-20J15.3 | ARHGEF28 | -0.599713452 | 3.18E-44    |
| RP11-20J15.3 | OR2W3    | -0.515062287 | 4.11E-31    |
| RP11-20J15.3 | ALDH1B1  | -0.592904045 | 5.06E-43    |
| RP11-20J15.3 | CXCL12   | -0.096119118 | 0.044131481 |
| RP11-20J15.3 | OLFM2    | -0.246460265 | 1.69E-07    |
| RP11-20J15.3 | TUB      | -0.302902342 | 9.09E-11    |
| RP11-20J15.3 | HTRA3    | -0.13047518  | 0.006187493 |
| RP11-20J15.3 | CKB      | -0.438877431 | 4.29E-22    |
| RP11-20J15.3 | RGS2     | -0.0920222   | 0.054020553 |
| RP11-20J15.3 | SHANK2   | -0.389410236 | 2.40E-17    |
| RP11-20J15.3 | CNTFR    | -0.406355747 | 6.95E-19    |
| RP11-20J15.3 | CYTH3    | -0.386827012 | 4.05E-17    |
| RP11-20J15.3 | PLAC9    | -0.114458838 | 0.016429537 |
| RP11-20J15.3 | WWOX     | -0.406968074 | 6.09E-19    |
| RP11-20J15.3 | NPR3     | -0.25241746  | 8.29E-08    |
| RP11-20J15.3 | SDC2     | -0.173004229 | 0.000270523 |
| RP11-20J15.3 | KLF15    | -0.420552037 | 3.05E-20    |
| RP11-20J15.3 | TMEM164  | -0.525849348 | 1.39E-32    |
| RP11-20J15.3 | LONRF3   | -0.18717994  | 7.96E-05    |
| RP11-20J15.3 | GBP1     | -0.134923006 | 0.004627949 |
| RP11-20J15.3 | ARHGAP6  | -0.365296719 | 2.64E-15    |
| RP11-20J15.3 | TMEM119  | -0.082714084 | 0.083437726 |
| RP11-20J15.3 | SH3RF1   | -0.41256968  | 1.80E-19    |
| RP11-20J15.3 | CRELD2   | -0.334434197 | 6.23E-13    |
| RP11-20J15.3 | PCP4     | -0.025668912 | 0.591697037 |
| RP11-20J15.3 | GCSH     | -0.441045778 | 2.55E-22    |
| RP11-20J15.3 | IMPA2    | -0.420047236 | 3.41E-20    |
| RP11-20J15.3 | C1R      | -0.048285897 | 0.312779821 |
| RP11-20J15.3 | SUCNR1   | -0.201471817 | 2.11E-05    |
| RP11-20J15.3 | SFRP1    | -0.321345248 | 5.29E-12    |
| RP11-20J15.3 | UGT8     | -0.591960731 | 7.38E-43    |

|              |          |              |             |
|--------------|----------|--------------|-------------|
| RP11-20J15.3 | TLE4     | -0.033271994 | 0.486848112 |
| RP11-20J15.3 | ANTXR1   | -0.356828425 | 1.25E-14    |
| RP11-20J15.3 | GPX3     | -0.469537479 | 1.87E-25    |
| RP11-20J15.3 | DPY19L2  | -0.418652117 | 4.67E-20    |
| RP11-20J15.3 | FAM46C   | -0.407148917 | 5.86E-19    |
| RP11-20J15.3 | IL33     | -0.109323244 | 0.021968275 |
| RP11-20J15.3 | PEG3     | -0.426588377 | 7.70E-21    |
| RP11-20J15.3 | FAHD2A   | -0.483357177 | 4.40E-27    |
| RP11-20J15.3 | PTGDS    | 0.097960388  | 0.040210225 |
| RP11-20J15.3 | CHCHD10  | -0.53085488  | 2.77E-33    |
| RP11-20J15.3 | CD36     | -0.377888171 | 2.38E-16    |
| RP11-20J15.3 | ANKRD37  | -0.22223271  | 2.58E-06    |
| RP11-20J15.3 | TSPAN33  | -0.403140718 | 1.38E-18    |
| RP11-20J15.3 | PRDM16   | -0.343719052 | 1.28E-13    |
| RP11-20J15.3 | UST      | -0.319466533 | 7.13E-12    |
| RP11-20J15.3 | NEXN     | -0.373792955 | 5.27E-16    |
| RP11-20J15.3 | NUPR1L   | -0.219802324 | 3.33E-06    |
| RP11-20J15.3 | SLC24A3  | -0.635190459 | 5.67E-51    |
| RP11-20J15.3 | MARC1    | -0.342455275 | 1.59E-13    |
| RP11-20J15.3 | MYH11    | -0.121374006 | 0.010920468 |
| RP11-20J15.3 | APOA1    | -0.351207683 | 3.44E-14    |
| RP11-20J15.3 | TMEM178B | -0.351341069 | 3.36E-14    |
| RP11-20J15.3 | CAPN6    | -0.075155947 | 0.115851592 |
| RP11-20J15.3 | PPM1L    | -0.51297266  | 7.80E-31    |
| RP11-20J15.3 | FZD8     | -0.475204544 | 4.10E-26    |
| RP11-20J15.3 | RCAN2    | -0.418052072 | 5.34E-20    |
| RP11-20J15.3 | COPZ2    | -0.588471588 | 2.95E-42    |
| RP11-20J15.3 | GAS1     | -0.267264206 | 1.29E-08    |
| RP11-20J15.3 | DACT1    | -0.347807531 | 6.28E-14    |
| RP11-20J15.3 | WBSCR17  | -0.285751224 | 1.08E-09    |
| RP11-20J15.3 | NCS1     | -0.327499526 | 1.96E-12    |
| RP11-20J15.3 | SPIRE2   | -0.348331126 | 5.73E-14    |
| RP11-20J15.3 | C15orf52 | -0.633147567 | 1.47E-50    |
| RP11-20J15.3 | SPAG5    | -0.421110098 | 2.69E-20    |
| RP11-20J15.3 | ARL4D    | -0.46057871  | 1.95E-24    |
| RP11-20J15.3 | FAM189A2 | -0.101211739 | 0.034004196 |
| RP11-20J15.3 | MAP1LC3A | -0.398312199 | 3.83E-18    |
| RP11-20J15.3 | KLF6     | 0.029082881  | 0.543356443 |
| RP11-20J15.3 | ADD3     | -0.148106703 | 0.001861335 |
| RP11-20J15.3 | TSPAN7   | -0.157355105 | 0.000939019 |
| RP11-20J15.3 | KLF9     | -0.217488798 | 4.24E-06    |
| RP11-20J15.3 | KCNQ1    | -0.491906105 | 3.96E-28    |
| RP11-20J15.3 | MAN1A1   | -0.130109451 | 0.006334652 |
| RP11-20J15.3 | MLF1     | -0.18695846  | 8.12E-05    |
| RP11-20J15.3 | RARB     | -0.384859578 | 6.01E-17    |
| RP11-20J15.3 | CDC42EP2 | -0.302214782 | 1.01E-10    |
| RP11-20J15.3 | FAM3B    | -0.128878014 | 0.006853504 |
| RP11-20J15.3 | GADD45B  | -0.171588119 | 0.000304147 |
| RP11-20J15.3 | TMEM47   | -0.281677213 | 1.89E-09    |
| RP11-20J15.3 | SDF2L1   | -0.283667837 | 1.44E-09    |
| RP11-20J15.3 | CCDC85A  | -0.267891201 | 1.19E-08    |

|              |          |              |             |
|--------------|----------|--------------|-------------|
| RP11-20J15.3 | CRYBG3   | -0.347106071 | 7.10E-14    |
| RP11-20J15.3 | FBLN2    | -0.040281697 | 0.399826736 |
| RP11-20J15.3 | PEBP4    | -0.314394904 | 1.58E-11    |
| RP11-20J15.3 | CDADC1   | -0.413076822 | 1.61E-19    |
| RP11-20J15.3 | FAM63A   | -0.488456323 | 1.05E-27    |
| RP11-20J15.3 | GLUL     | -0.329584402 | 1.39E-12    |
| RP11-20J15.3 | FREM2    | -0.579881952 | 8.36E-41    |
| RP11-20J15.3 | ACKR3    | -0.291660265 | 4.68E-10    |
| RP11-20J15.3 | DENND6A  | -0.489233453 | 8.47E-28    |
| RP11-20J15.3 | CLDN8    | -0.313958256 | 1.69E-11    |
| RP11-20J15.3 | UTS2R    | -0.04881148  | 0.307535699 |
| RP11-20J15.3 | SCNN1B   | -0.144783226 | 0.002358453 |
| RP11-20J15.3 | TTC30A   | -0.540949063 | 9.87E-35    |
| RP11-20J15.3 | CORO2B   | -0.298613658 | 1.71E-10    |
| RP11-20J15.3 | TC2N     | -0.468098249 | 2.74E-25    |
| RP11-20J15.3 | ALDH2    | -0.507277156 | 4.39E-30    |
| RP11-20J15.3 | GPR183   | -0.017775062 | 0.71034229  |
| RP11-20J15.3 | C4orf47  | -0.239038878 | 4.02E-07    |
| RP11-20J15.3 | SLC25A42 | -0.366119379 | 2.26E-15    |
| RP11-20J15.3 | LGMN     | -0.556037289 | 5.44E-37    |
| RP11-20J15.3 | ACSF2    | -0.598805831 | 4.62E-44    |
| RP11-20J15.3 | KIAA1467 | -0.504527556 | 9.99E-30    |
| RP11-20J15.3 | PRKG1    | -0.378089581 | 2.29E-16    |
| RP11-20J15.3 | GNAI1    | -0.491484847 | 4.47E-28    |
| RP11-20J15.3 | ABCC4    | -0.4002346   | 2.56E-18    |
| RP11-20J15.3 | PRPS1    | -0.532400205 | 1.68E-33    |
| RP11-20J15.3 | TSPAN5   | -0.418189371 | 5.18E-20    |
| RP11-20J15.3 | CR2      | -0.203147236 | 1.79E-05    |
| RP11-20J15.3 | CCDC170  | -0.428903669 | 4.51E-21    |
| RP11-20J15.3 | RRAD     | 0.027420327  | 0.56665188  |
| RP11-20J15.3 | SCGB2A1  | -0.494802862 | 1.73E-28    |
| RP11-20J15.3 | SESN3    | -0.179605864 | 0.0001548   |
| RP11-20J15.3 | SGK223   | -0.194025466 | 4.26E-05    |
| RP11-20J15.3 | NDRG2    | -0.45453003  | 9.11E-24    |
| RP11-20J15.3 | C3orf52  | -0.363102131 | 3.97E-15    |
| RP11-20J15.3 | FLRT3    | 0.335237212  | 5.44E-13    |
| RP11-20J15.3 | MST1R    | 0.534617558  | 8.10E-34    |
| RP11-20J15.3 | SDC1     | 0.052819322  | 0.269461551 |
| RP11-20J15.3 | ST8SIA4  | 0.292262296  | 4.29E-10    |
| RP11-20J15.3 | UBTD1    | 0.506280532  | 5.92E-30    |
| RP11-20J15.3 | EPHA2    | 0.445541687  | 8.53E-23    |
| RP11-20J15.3 | TMEM130  | 0.620008407  | 5.59E-48    |
| RP11-20J15.3 | SPINK2   | 0.24888385   | 1.27E-07    |
| RP11-20J15.3 | MMP16    | 0.402915621  | 1.45E-18    |
| RP11-20J15.3 | SIGLEC15 | 0.634558004  | 7.61E-51    |
| RP11-20J15.3 | RIN1     | 0.710496559  | 1.09E-68    |
| RP11-20J15.3 | IL1RN    | 0.222665032  | 2.46E-06    |
| RP11-20J15.3 | FCER1G   | 0.303953148  | 7.77E-11    |
| RP11-20J15.3 | CD276    | 0.58215526   | 3.48E-41    |
| RP11-20J15.3 | CTSB     | 0.264935582  | 1.74E-08    |
| RP11-20J15.3 | FAM171A2 | 0.391302071  | 1.63E-17    |

|              |          |              |             |
|--------------|----------|--------------|-------------|
| RP11-20J15.3 | ASPHD1   | 0.418914518  | 4.40E-20    |
| RP11-20J15.3 | C15orf48 | 0.177810905  | 0.000180528 |
| RP11-20J15.3 | DYSF     | 0.334542348  | 6.12E-13    |
| RP11-20J15.3 | PDZRN4   | 0.563588174  | 3.64E-38    |
| RP11-20J15.3 | EFHD2    | 0.396223919  | 5.92E-18    |
| RP11-20J15.3 | ASF1B    | 0.182843599  | 0.000116869 |
| RP11-20J15.3 | AQP1     | 0.320280045  | 6.27E-12    |
| RP11-20J15.3 | ARRDC2   | 0.593162169  | 4.56E-43    |
| RP11-20J15.3 | PRSS1    | 0.535800648  | 5.48E-34    |
| RP11-20J15.3 | MAPK13   | 0.33649567   | 4.40E-13    |
| RP11-20J15.3 | CST5     | 0.465757967  | 5.07E-25    |
| RP11-20J15.3 | AHR      | 0.425790538  | 9.25E-21    |
| RP11-20J15.3 | BAX      | 0.313923931  | 1.70E-11    |
| RP11-20J15.3 | C1orf115 | 0.509196578  | 2.46E-30    |
| RP11-20J15.3 | PLK3     | 0.484845695  | 2.91E-27    |
| RP11-20J15.3 | JAG2     | 0.367832072  | 1.64E-15    |
| RP11-20J15.3 | RAD23B   | 0.51534646   | 3.76E-31    |
| RP11-20J15.3 | CA12     | -0.060276949 | 0.207493405 |
| RP11-20J15.3 | ADTRP    | 0.638096081  | 1.45E-51    |
| RP11-20J15.3 | UCP2     | 0.602400714  | 1.05E-44    |
| RP11-20J15.3 | IGFBP2   | 0.346238094  | 8.27E-14    |
| RP11-20J15.3 | LOXL2    | 0.281193403  | 2.02E-09    |
| RP11-20J15.3 | GPX1     | 0.304187606  | 7.51E-11    |
| RP11-20J15.3 | P3H3     | 0.483567026  | 4.15E-27    |
| RP11-20J15.3 | C2orf81  | 0.683933004  | 7.93E-62    |
| RP11-20J15.3 | CDT1     | 0.236358211  | 5.46E-07    |
| RP11-20J15.3 | SNX25    | 0.473274413  | 6.90E-26    |
| RP11-20J15.3 | MTHFD1L  | 0.321362481  | 5.28E-12    |
| RP11-20J15.3 | CDC42BPG | 0.460801057  | 1.84E-24    |
| RP11-20J15.3 | MSN      | 0.437544012  | 5.90E-22    |
| RP11-20J15.3 | SIGLEC6  | 0.579108037  | 1.12E-40    |
| RP11-20J15.3 | F2R      | 0.158115711  | 0.000886147 |
| RP11-20J15.3 | TMEM184A | 0.409696185  | 3.37E-19    |
| RP11-20J15.3 | CKS2     | 0.094360399  | 0.0481725   |
| RP11-20J15.3 | TAX1BP3  | 0.486047488  | 2.08E-27    |
| RP11-20J15.3 | PMEPA1   | 0.476396975  | 2.97E-26    |
| RP11-20J15.3 | CXCL16   | 0.382493295  | 9.62E-17    |
| RP11-20J15.3 | FAXC     | 0.487423458  | 1.41E-27    |
| RP11-20J15.3 | VTCN1    | 0.357290553  | 1.15E-14    |
| RP11-20J15.3 | SH2D4A   | 0.431945455  | 2.22E-21    |
| RP11-20J15.3 | RNF24    | 0.372268338  | 7.06E-16    |
| RP11-20J15.3 | LY6G6C   | 0.476428774  | 2.95E-26    |
| RP11-20J15.3 | NID1     | 0.260227412  | 3.16E-08    |
| RP11-20J15.3 | STAC     | 0.466545478  | 4.13E-25    |
| RP11-20J15.3 | RAB34    | 0.697809011  | 2.56E-65    |
| RP11-20J15.3 | HES4     | 0.333248715  | 7.59E-13    |
| RP11-20J15.3 | EPHA10   | 0.515962533  | 3.11E-31    |
| RP11-20J15.3 | ENTPD2   | 0.683616634  | 9.47E-62    |
| RP11-20J15.3 | DDB2     | 0.416775743  | 7.10E-20    |
| RP11-20J15.3 | NKAIN4   | 0.392889025  | 1.18E-17    |
| RP11-20J15.3 | TRIM29   | 0.49972081   | 4.13E-29    |

|              |          |             |             |
|--------------|----------|-------------|-------------|
| RP11-20J15.3 | ADCY8    | 0.482737241 | 5.22E-27    |
| RP11-20J15.3 | SFTA2    | 0.221261759 | 2.86E-06    |
| RP11-20J15.3 | NRIP1    | 0.517190991 | 2.12E-31    |
| RP11-20J15.3 | VWA1     | 0.380845138 | 1.33E-16    |
| RP11-20J15.3 | APLNR    | 0.237068677 | 5.04E-07    |
| RP11-20J15.3 | REN      | 0.577007944 | 2.50E-40    |
| RP11-20J15.3 | EDIL3    | 0.195609016 | 3.68E-05    |
| RP11-20J15.3 | AGRN     | 0.413183413 | 1.57E-19    |
| RP11-20J15.3 | TREM1    | 0.329107756 | 1.51E-12    |
| RP11-20J15.3 | SRL      | 0.264724314 | 1.79E-08    |
| RP11-20J15.3 | RASGRF1  | 0.768054545 | 1.29E-86    |
| RP11-20J15.3 | RMI2     | 0.445479988 | 8.66E-23    |
| RP11-20J15.3 | SAMD1    | 0.462092546 | 1.32E-24    |
| RP11-20J15.3 | MGAT4B   | 0.48429891  | 3.39E-27    |
| RP11-20J15.3 | NXN      | 0.529087792 | 4.91E-33    |
| RP11-20J15.3 | SH3BGRL3 | 0.428599426 | 4.84E-21    |
| RP11-20J15.3 | CA11     | 0.471326268 | 1.16E-25    |
| RP11-20J15.3 | PLD3     | 0.429300744 | 4.11E-21    |
| RP11-20J15.3 | LURAP1L  | 0.173838662 | 0.00025237  |
| RP11-20J15.3 | CARNS1   | 0.42650143  | 7.85E-21    |
| RP11-20J15.3 | PDLIM7   | 0.539607276 | 1.55E-34    |
| RP11-20J15.3 | BCL2L1   | 0.442368063 | 1.85E-22    |
| RP11-20J15.3 | GGT6     | 0.367544496 | 1.73E-15    |
| RP11-20J15.3 | DPYSL3   | 0.310836332 | 2.74E-11    |
| RP11-20J15.3 | FYN      | 0.573736538 | 8.61E-40    |
| RP11-20J15.3 | TK1      | 0.142741753 | 0.002721068 |
| RP11-20J15.3 | AK1      | 0.272646744 | 6.37E-09    |
| RP11-20J15.3 | HIGD1B   | 0.317021672 | 1.05E-11    |
| RP11-20J15.3 | TMEM59L  | 0.442778896 | 1.67E-22    |
| RP11-20J15.3 | MEGF9    | 0.359578096 | 7.60E-15    |
| RP11-20J15.3 | ZFP36L1  | 0.413150861 | 1.58E-19    |
| RP11-20J15.3 | ADRA1B   | 0.44933564  | 3.34E-23    |
| RP11-20J15.3 | EPHA4    | 0.425761958 | 9.31E-21    |
| RP11-20J15.3 | TCERG1L  | 0.507128297 | 4.59E-30    |
| RP11-20J15.3 | NGFR     | 0.669519855 | 2.11E-58    |
| RP11-20J15.3 | EBI3     | 0.399947165 | 2.72E-18    |
| RP11-20J15.3 | S100A10  | 0.385672238 | 5.11E-17    |
| RP11-20J15.3 | S100B    | 0.427667622 | 6.00E-21    |
| RP11-20J15.3 | CD44     | 0.393049514 | 1.14E-17    |
| RP11-20J15.3 | BHLHE41  | 0.583422156 | 2.13E-41    |
| RP11-20J15.3 | FBX02    | 0.575717093 | 4.08E-40    |
| RP11-20J15.3 | SLC30A2  | 0.039937669 | 0.403867272 |
| RP11-20J15.3 | FRMD5    | 0.279627512 | 2.50E-09    |
| RP11-20J15.3 | SAMD11   | 0.426301864 | 8.22E-21    |
| RP11-20J15.3 | SIPA1L2  | 0.58527917  | 1.04E-41    |
| RP11-20J15.3 | S100A16  | 0.42727622  | 6.57E-21    |
| RP11-20J15.3 | PPL      | 0.39011361  | 2.08E-17    |
| RP11-20J15.3 | ARHGDIB  | 0.341968417 | 1.73E-13    |
| RP11-20J15.3 | CDC42EP3 | 0.346233626 | 8.27E-14    |
| RP11-20J15.3 | RUNX2    | 0.723161625 | 3.05E-72    |
| RP11-20J15.3 | LAMC2    | 0.273336573 | 5.82E-09    |

|              |          |             |          |
|--------------|----------|-------------|----------|
| RP11-20J15.3 | BRINP1   | 0.582047959 | 3.63E-41 |
| RP11-20J15.3 | GPRC5B   | 0.471212018 | 1.20E-25 |
| RP11-20J15.3 | AQP5     | 0.53123451  | 2.45E-33 |
| RP11-20J15.3 | PLAG1    | 0.523317044 | 3.11E-32 |
| RP11-20J15.3 | PTPRU    | 0.457252609 | 4.57E-24 |
| RP11-20J15.3 | ANGPTL4  | 0.324251862 | 3.32E-12 |
| RP11-20J15.3 | PALM3    | 0.605048474 | 3.48E-45 |
| RP11-20J15.3 | ACP5     | 0.36504751  | 2.76E-15 |
| RP11-20J15.3 | DLG4     | 0.471278327 | 1.18E-25 |
| RP11-20J15.3 | ETNK2    | 0.697304706 | 3.46E-65 |
| RP11-20J15.3 | CD109    | 0.636756776 | 2.72E-51 |
| RP11-20J15.3 | SNX22    | 0.584625297 | 1.34E-41 |
| RP11-20J15.3 | TMEM98   | 0.640189183 | 5.37E-52 |
| RP11-20J15.3 | CTHRC1   | 0.382742859 | 9.16E-17 |
| RP11-20J15.3 | S100A2   | 0.391506672 | 1.57E-17 |
| RP11-20J15.3 | C11orf80 | 0.555740847 | 6.04E-37 |
| RP11-20J15.3 | SREBF1   | 0.45465584  | 8.82E-24 |
| RP11-20J15.3 | PRSS22   | 0.477689403 | 2.09E-26 |
| RP11-20J15.3 | CMTM3    | 0.403683248 | 1.23E-18 |
| RP11-20J15.3 | RDH5     | 0.642512915 | 1.77E-52 |
| RP11-20J15.3 | MYH10    | 0.447969953 | 4.69E-23 |
| RP11-20J15.3 | EVPL     | 0.443708006 | 1.33E-22 |
| RP11-20J15.3 | SCD      | 0.34669389  | 7.63E-14 |
| RP11-20J15.3 | CD151    | 0.649191072 | 6.91E-54 |
| RP11-20J15.3 | S100A4   | 0.530704816 | 2.91E-33 |
| RP11-20J15.3 | BNIP1    | 0.573744127 | 8.59E-40 |
| RP11-20J15.3 | MAP3K6   | 0.495411489 | 1.45E-28 |
| RP11-20J15.3 | MANEAL   | 0.238852786 | 4.11E-07 |
| RP11-20J15.3 | CD207    | 0.497209496 | 8.60E-29 |
| RP11-20J15.3 | CD1A     | 0.470696262 | 1.38E-25 |
| RP11-20J15.3 | C3       | 0.461650721 | 1.48E-24 |
| RP11-20J15.3 | NT5E     | 0.467688621 | 3.05E-25 |
| RP11-20J15.3 | CACNG4   | 0.451147443 | 2.13E-23 |
| RP11-20J15.3 | FHOD1    | 0.486602217 | 1.78E-27 |
| RP11-20J15.3 | LEMD1    | 0.568582927 | 5.86E-39 |
| RP11-20J15.3 | ATP11A   | 0.409903765 | 3.23E-19 |
| RP11-20J15.3 | PPAP2C   | 0.389105639 | 2.55E-17 |
| RP11-20J15.3 | DRAM1    | 0.537460487 | 3.17E-34 |
| RP11-20J15.3 | CDA      | 0.339016556 | 2.87E-13 |
| RP11-20J15.3 | CCND2    | 0.457881377 | 3.89E-24 |
| RP11-20J15.3 | LCN6     | 0.657166289 | 1.29E-55 |
| RP11-20J15.3 | CDH4     | 0.312884472 | 2.00E-11 |
| RP11-20J15.3 | MMP11    | 0.431950277 | 2.22E-21 |
| RP11-20J15.3 | B3GAT1   | 0.394772136 | 8.00E-18 |
| RP11-20J15.3 | SPP1     | 0.24160423  | 2.99E-07 |
| RP11-20J15.3 | HLA-DQB1 | 0.196051338 | 3.53E-05 |
| RP11-20J15.3 | SDC3     | 0.679724884 | 8.30E-61 |
| RP11-20J15.3 | CX3CL1   | 0.373911389 | 5.15E-16 |
| RP11-20J15.3 | SDK1     | 0.649905013 | 4.86E-54 |
| RP11-20J15.3 | DOCK9    | 0.522851744 | 3.61E-32 |
| RP11-20J15.3 | CSF2     | 0.591587887 | 8.56E-43 |

|              |          |             |             |
|--------------|----------|-------------|-------------|
| RP11-20J15.3 | GRHL3    | 0.514153531 | 5.43E-31    |
| RP11-20J15.3 | TMEM92   | 0.578081805 | 1.66E-40    |
| RP11-20J15.3 | BASP1    | 0.587116752 | 5.04E-42    |
| RP11-20J15.3 | HRH1     | 0.550298666 | 4.06E-36    |
| RP11-20J15.3 | ESM1     | 0.128857022 | 0.006862669 |
| RP11-20J15.3 | B4GALNT3 | 0.4423331   | 1.86E-22    |
| RP11-20J15.3 | LMO3     | 0.289040305 | 6.79E-10    |
| RP11-20J15.3 | C9orf16  | 0.387061399 | 3.86E-17    |
| RP11-20J15.3 | SEMA3F   | 0.503497245 | 1.36E-29    |
| RP11-20J15.3 | PLA2G12B | 0.430255098 | 3.29E-21    |
| RP11-20J15.3 | KLK6     | 0.668902421 | 2.93E-58    |
| RP11-20J15.3 | ST3GAL5  | 0.54623359  | 1.65E-35    |
| RP11-20J15.3 | FAM132B  | 0.244785726 | 2.06E-07    |
| RP11-20J15.3 | CDKN1A   | 0.112767562 | 0.01810079  |
| RP11-20J15.3 | E2F1     | 0.231783795 | 9.13E-07    |
| RP11-20J15.3 | B3GNT8   | 0.413666229 | 1.41E-19    |
| RP11-20J15.3 | MTMR11   | 0.56685988  | 1.10E-38    |
| RP11-20J15.3 | MYO1G    | 0.477964427 | 1.94E-26    |
| RP11-20J15.3 | TMSB10   | 0.540816515 | 1.03E-34    |
| RP11-20J15.3 | UNC5CL   | 0.485752253 | 2.26E-27    |
| RP11-20J15.3 | ABR      | 0.341083064 | 2.02E-13    |
| RP11-20J15.3 | PLP2     | 0.451242864 | 2.08E-23    |
| RP11-20J15.3 | SRCIN1   | 0.283470257 | 1.48E-09    |
| RP11-20J15.3 | PDE9A    | 0.531079126 | 2.58E-33    |
| RP11-20J15.3 | TREM2    | 0.323092621 | 4.00E-12    |
| RP11-20J15.3 | KDELR3   | 0.321140079 | 5.47E-12    |
| RP11-20J15.3 | PC       | 0.619378434 | 7.38E-48    |
| RP11-20J15.3 | C2CD4A   | 0.384603418 | 6.32E-17    |
| RP11-20J15.3 | PELI1    | 0.55201448  | 2.23E-36    |
| RP11-20J15.3 | SSX1     | 0.381844812 | 1.09E-16    |
| RP11-20J15.3 | MROH6    | 0.593131178 | 4.62E-43    |
| RP11-20J15.3 | ESPN     | 0.671673878 | 6.67E-59    |
| RP11-20J15.3 | BMP1     | 0.601531105 | 1.51E-44    |
| RP11-20J15.3 | TM4SF4   | 0.547043235 | 1.25E-35    |
| RP11-20J15.3 | CORO2A   | 0.542390278 | 6.07E-35    |
| RP11-20J15.3 | CD164L2  | 0.460340828 | 2.07E-24    |
| RP11-20J15.3 | CTSS     | 0.272102157 | 6.85E-09    |
| RP11-20J15.3 | CLU      | 0.691901744 | 8.30E-64    |
| RP11-20J15.3 | TMSB4X   | 0.491568815 | 4.36E-28    |
| RP11-20J15.3 | WNT10A   | 0.656750313 | 1.59E-55    |
| RP11-20J15.3 | NAPSA    | 0.472111625 | 9.43E-26    |
| RP11-20J15.3 | PLEKHA4  | 0.728538844 | 8.24E-74    |
| RP11-20J15.3 | SFTPA1   | 0.242946465 | 2.56E-07    |
| RP11-20J15.3 | C1orf116 | 0.537497578 | 3.13E-34    |
| RP11-20J15.3 | TM4SF1   | 0.445834795 | 7.93E-23    |
| RP11-20J15.3 | SEL1L3   | 0.520692616 | 7.12E-32    |
| RP11-20J15.3 | VASN     | 0.633779313 | 1.09E-50    |
| RP11-20J15.3 | NPTXR    | 0.458903461 | 3.00E-24    |
| RP11-20J15.3 | PDE4C    | 0.338092552 | 3.36E-13    |
| RP11-20J15.3 | CDC42EP1 | 0.6733109   | 2.77E-59    |
| RP11-20J15.3 | ENDOD1   | 0.556753287 | 4.22E-37    |

|              |          |             |          |
|--------------|----------|-------------|----------|
| RP11-20J15.3 | RYR1     | 0.560094422 | 1.28E-37 |
| RP11-20J15.3 | IL1RAP   | 0.579681889 | 9.03E-41 |
| RP11-20J15.3 | SLC35F2  | 0.636088174 | 3.72E-51 |
| RP11-20J15.3 | ISYNA1   | 0.662173926 | 9.92E-57 |
| RP11-20J15.3 | HLA-G    | 0.370528128 | 9.84E-16 |
| RP11-20J15.3 | CDKN2B   | 0.314755244 | 1.50E-11 |
| RP11-20J15.3 | ALDH1A3  | 0.302483281 | 9.68E-11 |
| RP11-20J15.3 | CLIP3    | 0.543272298 | 4.51E-35 |
| RP11-20J15.3 | ULBP2    | 0.363619556 | 3.61E-15 |
| RP11-20J15.3 | ETHE1    | 0.517685368 | 1.82E-31 |
| RP11-20J15.3 | XPR1     | 0.404201169 | 1.10E-18 |
| RP11-20J15.3 | SPTBN2   | 0.427236364 | 6.63E-21 |
| RP11-20J15.3 | IVL      | 0.488256887 | 1.12E-27 |
| RP11-20J15.3 | MARCO    | 0.359222224 | 8.11E-15 |
| RP11-20J15.3 | PLXND1   | 0.521703424 | 5.18E-32 |
| RP11-20J15.3 | EMILIN2  | 0.388714308 | 2.77E-17 |
| RP11-20J15.3 | PLAUR    | 0.453253914 | 1.26E-23 |
| RP11-20J15.3 | CDC42EP5 | 0.620340521 | 4.83E-48 |
| RP11-20J15.3 | TRPC5    | 0.61824384  | 1.22E-47 |
| RP11-20J15.3 | TMEM100  | 0.47331817  | 6.82E-26 |
| RP11-20J15.3 | QSOX1    | 0.623104446 | 1.41E-48 |
| RP11-20J15.3 | ARHGAP23 | 0.605658023 | 2.70E-45 |
| RP11-20J15.3 | MDFI     | 0.528043014 | 6.88E-33 |
| RP11-20J15.3 | FSTL3    | 0.574820464 | 5.73E-40 |
| RP11-20J15.3 | INF2     | 0.650237056 | 4.13E-54 |
| RP11-20J15.3 | TGFBR1   | 0.635901351 | 4.06E-51 |
| RP11-20J15.3 | TGFBI    | 0.367812428 | 1.65E-15 |
| RP11-20J15.3 | ERBB3    | 0.513928151 | 5.82E-31 |
| RP11-20J15.3 | CCL18    | 0.376641983 | 3.04E-16 |
| RP11-20J15.3 | CCL17    | 0.42426459  | 1.31E-20 |
| RP11-20J15.3 | C16orf45 | 0.596597343 | 1.14E-43 |
| RP11-20J15.3 | PRDM1    | 0.487483952 | 1.39E-27 |
| RP11-20J15.3 | TRIM47   | 0.404947805 | 9.40E-19 |
| RP11-20J15.3 | CNFN     | 0.36738429  | 1.78E-15 |
| RP11-20J15.3 | ARMCX3   | 0.645037701 | 5.24E-53 |
| RP11-20J15.3 | RAMP1    | 0.690157846 | 2.28E-63 |
| RP11-20J15.3 | GABRD    | 0.34514502  | 1.00E-13 |
| RP11-20J15.3 | COL13A1  | 0.416188392 | 8.09E-20 |
| RP11-20J15.3 | S100A5   | 0.456064575 | 6.18E-24 |
| RP11-20J15.3 | MISP     | 0.371168881 | 8.71E-16 |
| RP11-20J15.3 | HES6     | 0.295014094 | 2.89E-10 |
| RP11-20J15.3 | PSD3     | 0.438631696 | 4.55E-22 |
| RP11-20J15.3 | DOK7     | 0.597226536 | 8.81E-44 |
| RP11-20J15.3 | ZMAT3    | 0.322680085 | 4.27E-12 |
| RP11-20J15.3 | MFAP2    | 0.569022625 | 4.98E-39 |
| RP11-20J15.3 | TMEM79   | 0.586753434 | 5.81E-42 |
| RP11-20J15.3 | SLC1A5   | 0.45984874  | 2.35E-24 |
| RP11-20J15.3 | BBC3     | 0.416218249 | 8.04E-20 |
| RP11-20J15.3 | HLA-DQB2 | 0.31465312  | 1.52E-11 |
| RP11-20J15.3 | C1QL1    | 0.696456444 | 5.73E-65 |
| RP11-20J15.3 | TMEM215  | 0.383299343 | 8.20E-17 |



|              |           |             |             |
|--------------|-----------|-------------|-------------|
| RP11-20J15.3 | PNP       | 0.453550639 | 1.17E-23    |
| RP11-20J15.3 | ARNTL     | 0.658124736 | 7.91E-56    |
| RP11-20J15.3 | CLDN2     | 0.508524781 | 3.01E-30    |
| RP11-20J15.3 | MVP       | 0.52186512  | 4.92E-32    |
| RP11-20J15.3 | LGALS1    | 0.476768662 | 2.69E-26    |
| RP11-20J15.3 | BIRC7     | 0.476491352 | 2.90E-26    |
| RP11-20J15.3 | COL8A1    | 0.519778045 | 9.49E-32    |
| RP11-20J15.3 | PERP      | 0.403424678 | 1.30E-18    |
| RP11-20J15.3 | GJA4      | 0.458425397 | 3.39E-24    |
| RP11-20J15.3 | IGFL2     | 0.546362515 | 1.57E-35    |
| RP11-20J15.3 | DAPK2     | 0.570280727 | 3.13E-39    |
| RP11-20J15.3 | MAMLD1    | 0.577516307 | 2.06E-40    |
| RP11-20J15.3 | ETV5      | 0.427725917 | 5.92E-21    |
| RP11-20J15.3 | RUNX1     | 0.483080309 | 4.75E-27    |
| RP11-20J15.3 | LONRF2    | 0.519634079 | 9.92E-32    |
| RP11-20J15.3 | SPOCK1    | 0.416085914 | 8.28E-20    |
| RP11-20J15.3 | XKRX      | 0.534500612 | 8.42E-34    |
| RP11-20J15.3 | TGFB1     | 0.443555247 | 1.39E-22    |
| RP11-20J15.3 | ERP27     | 0.380325656 | 1.48E-16    |
| RP11-20J15.3 | TNFRSF10C | 0.248474435 | 1.33E-07    |
| RP11-20J15.3 | PALM      | 0.70086647  | 4.10E-66    |
| RP11-20J15.3 | TSC22D1   | 0.740843429 | 1.51E-77    |
| RP11-20J15.3 | TGM2      | 0.305678891 | 6.00E-11    |
| RP11-20J15.3 | UBE2QL1   | 0.50731992  | 4.33E-30    |
| RP11-20J15.3 | ECE1      | 0.633057145 | 1.53E-50    |
| RP11-20J15.3 | COL8A2    | 0.690291741 | 2.11E-63    |
| RP11-20J15.3 | HIST3H2A  | 0.332204291 | 9.03E-13    |
| RP11-20J15.3 | TNFRSF21  | 0.44870517  | 3.91E-23    |
| RP11-20J15.3 | SOX4      | 0.548029046 | 8.89E-36    |
| RP11-20J15.3 | ELF3      | 0.496386412 | 1.09E-28    |
| RP11-20J15.3 | TPD52L1   | 0.533880284 | 1.03E-33    |
| RP11-20J15.3 | INHBB     | 0.690108983 | 2.34E-63    |
| RP11-20J15.3 | HPN       | 0.420430482 | 3.13E-20    |
| RP11-20J15.3 | MMP7      | 0.36899077  | 1.32E-15    |
| RP11-20J15.3 | RAB27A    | 0.548818445 | 6.77E-36    |
| RP11-20J15.3 | IGF2BP2   | 0.585639013 | 8.99E-42    |
| RP11-20J15.3 | ITGB4     | 0.571075304 | 2.33E-39    |
| RP11-20J15.3 | PPP1R1B   | 0.707370025 | 7.67E-68    |
| RP11-20J15.3 | NPDC1     | 0.460784587 | 1.85E-24    |
| RP11-20J15.3 | CCL13     | 0.495757856 | 1.31E-28    |
| RP11-20J15.3 | SPINT1    | 0.475287164 | 4.01E-26    |
| RP11-20J15.3 | HEY2      | 0.579396511 | 1.01E-40    |
| RP11-20J15.3 | CST2      | 0.357657171 | 1.08E-14    |
| RP11-20J15.3 | ADM       | 0.252448664 | 8.26E-08    |
| RP11-20J15.3 | VSTM2L    | 0.179148224 | 0.000161011 |
| RP11-20J15.3 | FAM84A    | 0.455224823 | 7.64E-24    |
| RP11-20J15.3 | P4HA2     | 0.361881473 | 4.98E-15    |
| RP11-20J15.3 | LPL       | 0.505189727 | 8.20E-30    |
| RP11-20J15.3 | TMEM173   | 0.556145369 | 5.24E-37    |
| RP11-20J15.3 | DHRS3     | 0.650935962 | 2.92E-54    |
| RP11-20J15.3 | SCN1B     | 0.476260527 | 3.08E-26    |

|              |            |             |             |
|--------------|------------|-------------|-------------|
| RP11-20J15.3 | GLT1D1     | 0.400349347 | 2.50E-18    |
| RP11-20J15.3 | PHYHIP     | 0.563655051 | 3.56E-38    |
| RP11-20J15.3 | BHLHE40    | 0.458390079 | 3.42E-24    |
| RP11-20J15.3 | BID        | 0.647311293 | 1.74E-53    |
| RP11-20J15.3 | POSTN      | 0.183531939 | 0.000110022 |
| RP11-20J15.3 | ITGA3      | 0.44850532  | 4.11E-23    |
| RP11-20J15.3 | RSPO4      | 0.61017237  | 4.00E-46    |
| RP11-20J15.3 | ADAMTS9    | 0.55146734  | 2.70E-36    |
| RP11-20J15.3 | ABTB2      | 0.570224843 | 3.19E-39    |
| RP11-20J15.3 | KCNQ3      | 0.518662773 | 1.34E-31    |
| RP11-20J15.3 | ANXA1      | 0.633041614 | 1.54E-50    |
| RP11-20J15.3 | S100A11    | 0.490384539 | 6.11E-28    |
| RP11-20J15.3 | CEACAM6    | 0.364114063 | 3.29E-15    |
| RP11-20J15.3 | IER5L      | 0.497578844 | 7.72E-29    |
| RP11-20J15.3 | KRT80      | 0.36901954  | 1.31E-15    |
| RP11-20J15.3 | CDH6       | 0.431576322 | 2.42E-21    |
| RP11-20J15.3 | UNC5B      | 0.38002035  | 1.57E-16    |
| RP11-20J15.3 | PLEKHN1    | 0.593136567 | 4.61E-43    |
| RP11-20J15.3 | SYTL1      | 0.464237562 | 7.55E-25    |
| RP11-20J15.3 | TMEM163    | 0.556218486 | 5.10E-37    |
| RP11-20J15.3 | C4orf48    | 0.333825854 | 6.89E-13    |
| RP11-20J15.3 | B3GNT7     | 0.54509527  | 2.43E-35    |
| RP11-20J15.3 | BAIAP3     | 0.694839066 | 1.49E-64    |
| RP11-20J15.3 | PHLDA2     | 0.422418624 | 2.00E-20    |
| RP11-20J15.3 | GAP43      | 0.629539991 | 7.71E-50    |
| RP11-20J15.3 | S100A1     | 0.23814232  | 4.46E-07    |
| RP11-20J15.3 | PTPRE      | 0.603793421 | 5.88E-45    |
| RP11-20J15.3 | CCND1      | 0.390554514 | 1.90E-17    |
| RP11-20J15.3 | ST6GALNAC5 | 0.448764777 | 3.85E-23    |
| RP11-20J15.3 | KRT17      | 0.452906978 | 1.37E-23    |
| RP11-20J15.3 | HPCAL4     | 0.63878364  | 1.05E-51    |
| RP11-20J15.3 | GABBR2     | 0.47196     | 9.82E-26    |
| RP11-20J15.3 | DIRAS3     | 0.597560068 | 7.69E-44    |
| RP11-20J15.3 | SERINC2    | 0.222996437 | 2.38E-06    |
| RP11-20J15.3 | PTCHD4     | 0.373947912 | 5.11E-16    |
| RP11-20J15.3 | EPS8       | 0.540741128 | 1.06E-34    |
| RP11-20J15.3 | LY6E       | 0.663387917 | 5.29E-57    |
| RP11-20J15.3 | UPP1       | 0.488473201 | 1.05E-27    |
| RP11-20J15.3 | AHNAK2     | 0.37553515  | 3.76E-16    |
| RP11-20J15.3 | PLXNC1     | 0.562969973 | 4.56E-38    |
| RP11-20J15.3 | TNC        | 0.359016205 | 8.42E-15    |
| RP11-20J15.3 | DUSP4      | 0.50047404  | 3.31E-29    |
| RP11-20J15.3 | NRCAM      | 0.505693323 | 7.05E-30    |
| RP11-20J15.3 | NRP2       | 0.666906278 | 8.40E-58    |
| RP11-20J15.3 | CTSC       | 0.51947281  | 1.04E-31    |
| RP11-20J15.3 | AMIGO2     | 0.633516346 | 1.23E-50    |
| RP11-20J15.3 | NAB2       | 0.594637    | 2.52E-43    |
| RP11-20J15.3 | TBC1D2     | 0.478476745 | 1.69E-26    |
| RP11-20J15.3 | PHLDA3     | 0.37761492  | 2.51E-16    |
| RP11-20J15.3 | PTP4A3     | 0.451332293 | 2.03E-23    |
| RP11-20J15.3 | CRABP2     | 0.335853711 | 4.91E-13    |

|              |         |             |          |
|--------------|---------|-------------|----------|
| RP11-20J15.3 | GOS2    | 0.547406732 | 1.10E-35 |
| RP11-20J15.3 | S100A6  | 0.478785172 | 1.55E-26 |
| RP11-20J15.3 | FOXQ1   | 0.495662967 | 1.35E-28 |
| RP11-20J15.3 | LRG1    | 0.583774411 | 1.86E-41 |
| RP11-20J15.3 | LAMP5   | 0.539745993 | 1.48E-34 |
| RP11-20J15.3 | ALDH3B1 | 0.477156376 | 2.42E-26 |
| RP11-20J15.3 | CDH2    | 0.348598703 | 5.46E-14 |
| RP11-20J15.3 | SCG5    | 0.486056282 | 2.07E-27 |
| RP11-20J15.3 | ZCCHC16 | 0.618143782 | 1.27E-47 |
| RP11-20J15.3 | GRB7    | 0.646766706 | 2.26E-53 |
| RP11-20J15.3 | TIAM1   | 0.54783409  | 9.50E-36 |
| RP11-20J15.3 | FXD5    | 0.484700666 | 3.03E-27 |
| RP11-20J15.3 | CLDN9   | 0.435467788 | 9.67E-22 |
| RP11-20J15.3 | FAM43A  | 0.617635246 | 1.59E-47 |
| RP11-20J15.3 | CHST2   | 0.605219743 | 3.24E-45 |
| RP11-20J15.3 | HMGA2   | 0.537205179 | 3.45E-34 |
| RP11-20J15.3 | GALNT7  | 0.490262487 | 6.33E-28 |
| RP11-20J15.3 | CBLN1   | 0.406379517 | 6.91E-19 |
| RP11-20J15.3 | STRA6   | 0.645629378 | 3.94E-53 |
| RP11-20J15.3 | MUC21   | 0.4121664   | 1.97E-19 |
| RP11-20J15.3 | PRR36   | 0.597150085 | 9.09E-44 |
| RP11-20J15.3 | NFE2L3  | 0.428549925 | 4.89E-21 |
| RP11-20J15.3 | NR1D1   | 0.191952433 | 5.16E-05 |
| RP11-20J15.3 | MUC1    | 0.338265382 | 3.26E-13 |
| RP11-20J15.3 | NAT8L   | 0.560604684 | 1.07E-37 |
| RP11-20J15.3 | APOC1   | 0.591719181 | 8.13E-43 |
| RP11-20J15.3 | EVA1A   | 0.599804866 | 3.07E-44 |
| RP11-20J15.3 | ENTPD1  | 0.409100749 | 3.84E-19 |
| RP11-20J15.3 | COL1A1  | 0.394687814 | 8.14E-18 |
| RP11-20J15.3 | FNDC4   | 0.420632246 | 2.99E-20 |
| RP11-20J15.3 | FRMD3   | 0.354315269 | 1.98E-14 |
| RP11-20J15.3 | SHROOM4 | 0.614740333 | 5.61E-47 |
| RP11-20J15.3 | NELL2   | 0.650864405 | 3.03E-54 |
| RP11-20J15.3 | EPHB3   | 0.551423796 | 2.75E-36 |
| RP11-20J15.3 | TMC6    | 0.540068674 | 1.33E-34 |
| RP11-20J15.3 | NOD1    | 0.770476641 | 1.75E-87 |
| RP11-20J15.3 | GGCT    | 0.66793205  | 4.89E-58 |
| RP11-20J15.3 | ICAM1   | 0.479830802 | 1.16E-26 |
| RP11-20J15.3 | PRSS23  | 0.567165328 | 9.88E-39 |
| RP11-20J15.3 | CFI     | 0.587337948 | 4.62E-42 |
| RP11-20J15.3 | CD55    | 0.48020107  | 1.05E-26 |
| RP11-20J15.3 | RASD2   | 0.697305699 | 3.46E-65 |
| RP11-20J15.3 | KLK11   | 0.611257182 | 2.51E-46 |
| RP11-20J15.3 | ICAM5   | 0.68958553  | 3.17E-63 |
| RP11-20J15.3 | ADORA1  | 0.377047994 | 2.81E-16 |
| RP11-20J15.3 | ITGA2   | 0.403875864 | 1.18E-18 |
| RP11-20J15.3 | ABCC3   | 0.534400759 | 8.70E-34 |
| RP11-20J15.3 | MFGE8   | 0.608892921 | 6.89E-46 |
| RP11-20J15.3 | STK32A  | 0.275423861 | 4.41E-09 |
| RP11-20J15.3 | CYSLTR2 | 0.647807442 | 1.36E-53 |
| RP11-20J15.3 | LAD1    | 0.525990618 | 1.33E-32 |

|              |           |             |             |
|--------------|-----------|-------------|-------------|
| RP11-20J15.3 | MGAT3     | 0.504462311 | 1.02E-29    |
| RP11-20J15.3 | IGFBP6    | 0.653193526 | 9.50E-55    |
| RP11-20J15.3 | CYP2S1    | 0.468234768 | 2.64E-25    |
| RP11-20J15.3 | KCNJ2     | 0.581754709 | 4.07E-41    |
| RP11-20J15.3 | FAM20A    | 0.574178576 | 7.29E-40    |
| RP11-20J15.3 | TGFA      | 0.547887563 | 9.33E-36    |
| RP11-20J15.3 | MXRA8     | 0.730552021 | 2.08E-74    |
| RP11-20J15.3 | C8orf4    | 0.419047774 | 4.27E-20    |
| RP11-20J15.3 | CLDN10    | 0.676530653 | 4.81E-60    |
| RP11-20J15.3 | PDE5A     | 0.644079941 | 8.33E-53    |
| RP11-20J15.3 | APOE      | 0.621138218 | 3.39E-48    |
| RP11-20J15.3 | SPOCK2    | 0.518099393 | 1.60E-31    |
| RP11-20J15.3 | TENM1     | 0.468665955 | 2.36E-25    |
| RP11-20J15.3 | SLIT1     | 0.359248606 | 8.07E-15    |
| RP11-20J15.3 | CXCL14    | 0.582273978 | 3.33E-41    |
| RP11-20J15.3 | ECM1      | 0.283550892 | 1.46E-09    |
| RP11-20J15.3 | DUSP5     | 0.53251091  | 1.62E-33    |
| RP11-20J15.3 | SEZ6L2    | 0.304123425 | 7.58E-11    |
| RP11-20J15.3 | THRSP     | 0.137777282 | 0.003823966 |
| RP11-20J15.3 | C19orf33  | 0.485288088 | 2.57E-27    |
| RP11-20J15.3 | MPZL2     | 0.570957224 | 2.43E-39    |
| RP11-20J15.3 | CTSH      | 0.64229725  | 1.96E-52    |
| RP11-20J15.3 | CYP1B1    | 0.588516905 | 2.90E-42    |
| RP11-20J15.3 | ALOX5     | 0.363801676 | 3.49E-15    |
| RP11-20J15.3 | SYTL5     | 0.594869565 | 2.29E-43    |
| RP11-20J15.3 | TNFRSF12A | 0.614812457 | 5.43E-47    |
| RP11-20J15.3 | DUSP6     | 0.598142809 | 6.06E-44    |
| RP11-20J15.3 | ALOX15B   | 0.428580846 | 4.86E-21    |
| RP11-20J15.3 | SDC4      | 0.768935146 | 6.25E-87    |
| RP11-20J15.3 | MDK       | 0.722761571 | 3.98E-72    |
| RP11-20J15.3 | KRT19     | 0.466902839 | 3.76E-25    |
| RP11-20J15.3 | MET       | 0.528514838 | 5.91E-33    |
| RP11-20J15.3 | TESC      | 0.621551321 | 2.82E-48    |
| RP11-20J15.3 | CXCL17    | 0.463784831 | 8.49E-25    |
| RP11-20J15.3 | NPC2      | 0.589982375 | 1.62E-42    |
| RP11-20J15.3 | COMP      | 0.522432897 | 4.12E-32    |
| RP11-20J15.3 | TUSC3     | 0.666140353 | 1.26E-57    |
| RP11-20J15.3 | TMPRSS4   | 0.545434263 | 2.16E-35    |
| RP11-20J15.3 | LGALS3    | 0.554634653 | 8.92E-37    |
| RP11-20J15.3 | CRLF1     | 0.456340804 | 5.76E-24    |
| RP11-20J15.3 | CTXN1     | 0.646343604 | 2.78E-53    |
| RP11-20J15.3 | PCSK1N    | 0.388594668 | 2.83E-17    |
| RP11-20J15.3 | NMU       | 0.395960369 | 6.25E-18    |
| RP11-20J15.3 | GALE      | 0.591270831 | 9.72E-43    |
| RP11-20J15.3 | PCSK2     | 0.165762621 | 0.000487804 |
| RP11-20J15.3 | GJB3      | 0.683507277 | 1.01E-61    |
| RP11-20J15.3 | SLPI      | 0.383110361 | 8.51E-17    |
| RP11-20J15.3 | AGR2      | 0.351323339 | 3.37E-14    |
| RP11-20J15.3 | MRC2      | 0.580172223 | 7.48E-41    |
| RP11-20J15.3 | GOLT1A    | 0.574716852 | 5.96E-40    |
| RP11-20J15.3 | SLC27A6   | 0.653910576 | 6.64E-55    |

|              |          |              |             |
|--------------|----------|--------------|-------------|
| RP11-20J15.3 | KCNN4    | 0.557283477  | 3.50E-37    |
| RP11-20J15.3 | ETV4     | 0.610050553  | 4.21E-46    |
| RP11-20J15.3 | SYT12    | 0.783923376  | 1.68E-92    |
| RP11-20J15.3 | PVRL4    | 0.532677427  | 1.53E-33    |
| RP11-20J15.3 | PLCD3    | 0.608424501  | 8.40E-46    |
| RP11-20J15.3 | PLAU     | 0.454034093  | 1.03E-23    |
| RP11-20J15.3 | LRRK2    | 0.405937124  | 7.60E-19    |
| RP11-20J15.3 | SFN      | 0.454592793  | 8.97E-24    |
| RP11-20J15.3 | LPAR5    | 0.587758427  | 3.91E-42    |
| RP11-20J15.3 | NGEF     | 0.533709582  | 1.09E-33    |
| RP11-20J15.3 | DTX4     | 0.618049625  | 1.32E-47    |
| RP11-20J15.3 | CST6     | 0.666602958  | 9.86E-58    |
| RP11-20J15.3 | QPCT     | 0.636694863  | 2.80E-51    |
| RP11-20J15.3 | TIMP1    | 0.694137607  | 2.25E-64    |
| RP11-20J15.3 | CAMK2N1  | 0.724264273  | 1.47E-72    |
| RP11-20J15.3 | KLHDC8A  | 0.350669324  | 3.79E-14    |
| RP11-20J15.3 | PDLIM4   | 0.624812459  | 6.58E-49    |
| RP11-20J15.3 | SCEL     | 0.441024503  | 2.56E-22    |
| RP11-20J15.3 | LCN2     | 0.344752838  | 1.07E-13    |
| RP11-20J15.3 | PROS1    | 0.478018822  | 1.91E-26    |
| RP11-20J15.3 | GABRB2   | 0.622488019  | 1.86E-48    |
| RP11-20J15.3 | TMPRSS6  | 0.583068413  | 2.45E-41    |
| RP11-20J15.3 | KLK7     | 0.547406543  | 1.10E-35    |
| RP11-20J15.3 | PDZK1IP1 | 0.40434088   | 1.07E-18    |
| RP11-20J15.3 | CDH3     | 0.688848611  | 4.84E-63    |
| RP11-20J15.3 | LRP4     | 0.572129514  | 1.57E-39    |
| RP11-20J15.3 | IGSF1    | 0.398730692  | 3.51E-18    |
| RP11-20J15.3 | B3GNT3   | 0.409769019  | 3.32E-19    |
| RP11-20J15.3 | CLDN1    | 0.484577409  | 3.13E-27    |
| RP11-20J15.3 | GDF15    | 0.337787388  | 3.54E-13    |
| RP11-20J15.3 | ARHGAP36 | 0.368988558  | 1.32E-15    |
| RP11-20J15.3 | LAMB3    | 0.552918484  | 1.63E-36    |
| RP11-20J15.3 | KLK10    | 0.597531984  | 7.78E-44    |
| RP11-20J15.3 | DPP4     | 0.428033564  | 5.51E-21    |
| RP11-20J15.3 | METTL7B  | 0.586533017  | 6.33E-42    |
| RP11-20J15.3 | LIPH     | 0.531664208  | 2.13E-33    |
| RP11-20J15.3 | CLDN16   | 0.431873756  | 2.26E-21    |
| RP11-20J15.3 | CHI3L1   | 0.423601624  | 1.53E-20    |
| RP11-20J15.3 | SLC22A31 | 0.685585233  | 3.12E-62    |
| RP11-20J15.3 | TACSTD2  | 0.654233198  | 5.65E-55    |
| RP11-20J15.3 | SFTPB    | 0.50827988   | 3.25E-30    |
| RP11-20J15.3 | RXRG     | 0.635632923  | 4.61E-51    |
| RP11-20J15.3 | DCSTAMP  | 0.549618101  | 5.14E-36    |
| RP11-20J15.3 | CITED1   | 0.458364477  | 3.44E-24    |
| RP11-20J15.3 | SERPINA1 | 0.610070956  | 4.17E-46    |
| RP11-20J15.3 | PRR15    | 0.70207727   | 1.97E-66    |
| RP11-20J15.3 | SLC34A2  | 0.406816661  | 6.29E-19    |
| RP11-20J15.3 | FN1      | 0.429400385  | 4.02E-21    |
| RP11-20J15.3 | ZCCHC12  | 0.522465945  | 4.07E-32    |
| RP4-647J21.1 | TFF3     | -0.366380628 | 2.41E-15    |
| RP4-647J21.1 | CCL21    | -0.003200982 | 0.946679653 |

|              |           |              |             |
|--------------|-----------|--------------|-------------|
| RP4-647J21.1 | TPO       | -0.354176536 | 2.68E-14    |
| RP4-647J21.1 | MT1G      | -0.383698659 | 0           |
| RP4-647J21.1 | DIO1      | -0.298380929 | 2.18E-10    |
| RP4-647J21.1 | DPT       | 0.014544694  | 0.761209876 |
| RP4-647J21.1 | CDH16     | -0.290915615 | 6.27E-10    |
| RP4-647J21.1 | CRABP1    | -0.53325225  | 1.27E-33    |
| RP4-647J21.1 | SLC26A7   | -0.509681944 | 0           |
| RP4-647J21.1 | MT1H      | -0.348010074 | 6.06E-14    |
| RP4-647J21.1 | SLC26A4   | -0.406838961 | 0           |
| RP4-647J21.1 | SLC5A8    | -0.48202904  | 6.35E-27    |
| RP4-647J21.1 | PKHD1L1   | -0.279732708 | 2.46E-09    |
| RP4-647J21.1 | TFCP2L1   | -0.441617    | 0           |
| RP4-647J21.1 | WSCD2     | -0.327059983 | 2.11E-12    |
| RP4-647J21.1 | IPCEF1    | -0.316411407 | 1.49E-11    |
| RP4-647J21.1 | SLC5A5    | -0.129407785 | 0.006625799 |
| RP4-647J21.1 | MT1F      | -0.337683715 | 4.90E-13    |
| RP4-647J21.1 | FOSB      | -0.162526488 | 0.000639506 |
| RP4-647J21.1 | SEMA3D    | -0.291066044 | 5.09E-10    |
| RP4-647J21.1 | BMP8A     | -0.299799868 | 1.78E-10    |
| RP4-647J21.1 | MATN2     | -0.551212991 | 0           |
| RP4-647J21.1 | PLA2R1    | -0.298667724 | 2.09E-10    |
| RP4-647J21.1 | COL23A1   | -0.531026305 | 0           |
| RP4-647J21.1 | HGD       | -0.439733687 | 0           |
| RP4-647J21.1 | TCEAL2    | -0.295368876 | 3.35E-10    |
| RP4-647J21.1 | CHRD1     | 0.043389966  | 0.364430104 |
| RP4-647J21.1 | TNFRSF11B | -0.362626483 | 5.26E-15    |
| RP4-647J21.1 | FAM167A   | -0.508828369 | 0           |
| RP4-647J21.1 | KIT       | -0.313812384 | 2.23E-11    |
| RP4-647J21.1 | SLC4A4    | -0.460757495 | 0           |
| RP4-647J21.1 | SMOC2     | -0.154031153 | 0.001220167 |
| RP4-647J21.1 | FHL1      | -0.470402704 | 0           |
| RP4-647J21.1 | OTOS      | -0.366976061 | 2.13E-15    |
| RP4-647J21.1 | IGFBPL1   | -0.451289222 | 2.06E-23    |
| RP4-647J21.1 | HBB       | -0.213528284 | 6.71E-06    |
| RP4-647J21.1 | BEX1      | -0.442898215 | 0           |
| RP4-647J21.1 | FABP4     | -0.415830501 | 8.76E-20    |
| RP4-647J21.1 | LMOD1     | -0.33501746  | 7.65E-13    |
| RP4-647J21.1 | SOD3      | -0.32743201  | 2.64E-12    |
| RP4-647J21.1 | TMEM171   | -0.31081806  | 3.50E-11    |
| RP4-647J21.1 | PI16      | -0.068627045 | 0.151096003 |
| RP4-647J21.1 | ZMAT4     | -0.375432472 | 3.84E-16    |
| RP4-647J21.1 | MFAP4     | -0.093421027 | 0.050481842 |
| RP4-647J21.1 | CWH43     | -0.348777447 | 5.29E-14    |
| RP4-647J21.1 | SPX       | -0.597133472 | 0           |
| RP4-647J21.1 | APOD      | 0.13686035   | 0.004094122 |
| RP4-647J21.1 | DPP6      | -0.369014544 | 1.36E-15    |
| RP4-647J21.1 | MMRN1     | -0.190658748 | 5.99E-05    |
| RP4-647J21.1 | WDR72     | -0.552559167 | 0           |
| RP4-647J21.1 | MPPED2    | -0.482184831 | 0           |
| RP4-647J21.1 | PAPSS2    | -0.154169019 | 0.001207744 |
| RP4-647J21.1 | DCN       | 0.129536022  | 0.006604455 |

|              |            |              |             |
|--------------|------------|--------------|-------------|
| RP4-647J21.1 | SORBS2     | -0.438972163 | 0           |
| RP4-647J21.1 | EGR2       | -0.26965352  | 1.08E-08    |
| RP4-647J21.1 | EDN3       | -0.427838327 | 5.77E-21    |
| RP4-647J21.1 | DIO2       | -0.582811467 | 0           |
| RP4-647J21.1 | ITPR1      | -0.333863048 | 9.26E-13    |
| RP4-647J21.1 | CFD        | -0.052759441 | 0.269889345 |
| RP4-647J21.1 | CPXM1      | -0.131006448 | 0.006010783 |
| RP4-647J21.1 | ELMO1      | -0.303269346 | 1.07E-10    |
| RP4-647J21.1 | GPC3       | -0.158940709 | 0.000831918 |
| RP4-647J21.1 | MYOC       | -0.175719386 | 0.000215547 |
| RP4-647J21.1 | DEPTOR     | -0.386715251 | 0           |
| RP4-647J21.1 | DGKI       | -0.299987802 | 1.73E-10    |
| RP4-647J21.1 | CARTPT     | -0.33846212  | 3.16E-13    |
| RP4-647J21.1 | IYD        | -0.427539807 | 0           |
| RP4-647J21.1 | LYVE1      | -0.082851607 | 0.082925191 |
| RP4-647J21.1 | CLCNKB     | -0.472217652 | 0           |
| RP4-647J21.1 | NCAM1      | -0.260173268 | 3.57E-08    |
| RP4-647J21.1 | HBA2       | -0.161609227 | 0.000686749 |
| RP4-647J21.1 | GLT8D2     | -0.284688398 | 1.48E-09    |
| RP4-647J21.1 | OGDHL      | -0.546470667 | 0           |
| RP4-647J21.1 | LIFR       | -0.430056281 | 0           |
| RP4-647J21.1 | CSGALNACT1 | -0.282154336 | 2.09E-09    |
| RP4-647J21.1 | RAP1GAP    | -0.626859272 | 0           |
| RP4-647J21.1 | COL9A3     | -0.343069129 | 1.95E-13    |
| RP4-647J21.1 | FBLN1      | 0.115280965  | 0.015708061 |
| RP4-647J21.1 | EFEMP1     | -0.045390719 | 0.342574663 |
| RP4-647J21.1 | AOX1       | -0.204598154 | 1.56E-05    |
| RP4-647J21.1 | GRIN2C     | -0.315967741 | 1.60E-11    |
| RP4-647J21.1 | C11orf74   | -0.483452287 | 0           |
| RP4-647J21.1 | PPARGC1A   | -0.502906101 | 0           |
| RP4-647J21.1 | ANGPTL1    | -0.396684415 | 0           |
| RP4-647J21.1 | SCARA5     | 0.008175253  | 0.86437705  |
| RP4-647J21.1 | LTF        | -0.215874837 | 5.29E-06    |
| RP4-647J21.1 | CA4        | -0.532969025 | 1.39E-33    |
| RP4-647J21.1 | TG         | -0.616802168 | 0           |
| RP4-647J21.1 | FCGBP      | -0.428818326 | 0           |
| RP4-647J21.1 | PBX4       | -0.317320158 | 1.30E-11    |
| RP4-647J21.1 | CYR61      | -0.230328892 | 1.15E-06    |
| RP4-647J21.1 | FOS        | -0.161610788 | 0.000686666 |
| RP4-647J21.1 | KHDRBS2    | -0.294590048 | 3.74E-10    |
| RP4-647J21.1 | MUM1L1     | -0.322052695 | 6.22E-12    |
| RP4-647J21.1 | RGS16      | -0.32530417  | 3.71E-12    |
| RP4-647J21.1 | MT1M       | -0.239647733 | 4.08E-07    |
| RP4-647J21.1 | LRP2       | -0.397109217 | 0           |
| RP4-647J21.1 | MAFB       | -0.169102341 | 0.000379515 |
| RP4-647J21.1 | KCNK2      | -0.244674725 | 2.29E-07    |
| RP4-647J21.1 | TBC1D4     | -0.327901917 | 2.45E-12    |
| RP4-647J21.1 | MIOX       | -0.388332491 | 2.99E-17    |
| RP4-647J21.1 | TPPP       | -0.394376158 | 0           |
| RP4-647J21.1 | FMOD       | -0.294729474 | 3.67E-10    |
| RP4-647J21.1 | CITED2     | -0.252291663 | 9.33E-08    |

|              |          |              |             |
|--------------|----------|--------------|-------------|
| RP4-647J21.1 | RGS8     | -0.383889651 | 7.29E-17    |
| RP4-647J21.1 | ABI3BP   | -0.232632611 | 8.93E-07    |
| RP4-647J21.1 | ADH1B    | -0.083827613 | 0.079350861 |
| RP4-647J21.1 | OGN      | 0.001398525  | 0.976690069 |
| RP4-647J21.1 | NR4A1    | -0.111779857 | 0.019185436 |
| RP4-647J21.1 | FOXJ1    | -0.384358182 | 6.64E-17    |
| RP4-647J21.1 | ALDH1A1  | -0.507218943 | 0           |
| RP4-647J21.1 | OCA2     | -0.216759128 | 4.58E-06    |
| RP4-647J21.1 | TMEM139  | -0.139096696 | 0.003521992 |
| RP4-647J21.1 | ARHGAP24 | -0.38685723  | 0           |
| RP4-647J21.1 | SLC25A15 | -0.422639617 | 0           |
| RP4-647J21.1 | DES      | -0.008892763 | 0.852604336 |
| RP4-647J21.1 | GDF10    | -0.207793788 | 1.14E-05    |
| RP4-647J21.1 | KIAA1324 | -0.29131049  | 5.93E-10    |
| RP4-647J21.1 | JUN      | -0.216772808 | 4.82E-06    |
| RP4-647J21.1 | C7       | 0.167809354  | 0.000421155 |
| RP4-647J21.1 | LGI3     | -0.492479937 | 0           |
| RP4-647J21.1 | CDON     | -0.502119472 | 0           |
| RP4-647J21.1 | BCL2     | -0.473240723 | 0           |
| RP4-647J21.1 | HLF      | -0.514366541 | 0           |
| RP4-647J21.1 | EGR1     | -0.323225121 | 5.17E-12    |
| RP4-647J21.1 | IP6K3    | -0.340119909 | 3.24E-13    |
| RP4-647J21.1 | SCUBE3   | -0.274612572 | 5.69E-09    |
| RP4-647J21.1 | PKNOX2   | -0.332516588 | 1.16E-12    |
| RP4-647J21.1 | SMAD9    | -0.319586006 | 9.14E-12    |
| RP4-647J21.1 | IQGAP2   | -0.356363665 | 1.78E-14    |
| RP4-647J21.1 | GNA14    | -0.384556206 | 0           |
| RP4-647J21.1 | LAYN     | -0.233167053 | 8.42E-07    |
| RP4-647J21.1 | AVPR1A   | -0.391607497 | 0           |
| RP4-647J21.1 | PDLIM3   | -0.180286057 | 0.000149516 |
| RP4-647J21.1 | GPM6A    | -0.48960731  | 0           |
| RP4-647J21.1 | SDPR     | -0.428233248 | 0           |
| RP4-647J21.1 | CRYAB    | -0.333377256 | 1.00E-12    |
| RP4-647J21.1 | FOXA2    | -0.117643496 | 0.013646073 |
| RP4-647J21.1 | C8orf88  | -0.413031286 | 0           |
| RP4-647J21.1 | ISM1     | -0.188834581 | 7.06E-05    |
| RP4-647J21.1 | BMP2     | -0.065074592 | 0.173440776 |
| RP4-647J21.1 | ID4      | -0.41489531  | 0           |
| RP4-647J21.1 | NUPR1    | -0.414540575 | 0           |
| RP4-647J21.1 | SERTM1   | -0.408716272 | 4.17E-19    |
| RP4-647J21.1 | IRS1     | -0.513738061 | 0           |
| RP4-647J21.1 | FIBIN    | -0.15494345  | 0.001140101 |
| RP4-647J21.1 | PODN     | 0.073091085  | 0.126204308 |
| RP4-647J21.1 | TDRD9    | -0.335972733 | 6.52E-13    |
| RP4-647J21.1 | EPHA3    | -0.132425387 | 0.005483823 |
| RP4-647J21.1 | AIF1L    | -0.335322835 | 7.27E-13    |
| RP4-647J21.1 | EBF4     | -0.360794373 | 7.57E-15    |
| RP4-647J21.1 | ADM2     | -0.359829739 | 9.15E-15    |
| RP4-647J21.1 | GSTM3    | -0.498875657 | 0           |
| RP4-647J21.1 | HSD17B6  | -0.083604337 | 0.080160544 |
| RP4-647J21.1 | AGR3     | -0.123683876 | 0.009485443 |



|              |          |              |             |
|--------------|----------|--------------|-------------|
| RP4-647J21.1 | EPHB1    | -0.493045442 | 0           |
| RP4-647J21.1 | TMOD1    | -0.267210518 | 1.48E-08    |
| RP4-647J21.1 | WASF3    | -0.534630954 | 0           |
| RP4-647J21.1 | SELV     | -0.333088777 | 7.80E-13    |
| RP4-647J21.1 | ENPP1    | -0.398874948 | 0           |
| RP4-647J21.1 | SYNE1    | -0.375777777 | 3.59E-16    |
| RP4-647J21.1 | PLCH1    | -0.318450883 | 1.09E-11    |
| RP4-647J21.1 | CCDC146  | -0.362501383 | 5.39E-15    |
| RP4-647J21.1 | SLC16A2  | -0.35428107  | 2.63E-14    |
| RP4-647J21.1 | IER2     | -0.332729627 | 1.12E-12    |
| RP4-647J21.1 | KCNAB1   | -0.41498722  | 0           |
| RP4-647J21.1 | SYNDIG1  | -0.281927964 | 2.15E-09    |
| RP4-647J21.1 | C16orf89 | -0.561296476 | 0           |
| RP4-647J21.1 | CTGF     | -0.065381244 | 0.171419863 |
| RP4-647J21.1 | NR4A3    | 0.033226057  | 0.487300589 |
| RP4-647J21.1 | KIAA1456 | -0.562505213 | 0           |
| RP4-647J21.1 | AQP4     | -0.4067401   | 0           |
| RP4-647J21.1 | RNF150   | -0.341954005 | 2.37E-13    |
| RP4-647J21.1 | C1S      | 0.277104225  | 4.10E-09    |
| RP4-647J21.1 | PFKFB2   | -0.584029848 | 0           |
| RP4-647J21.1 | PROX1    | -0.329172636 | 1.99E-12    |
| RP4-647J21.1 | TCF7L1   | -0.354652258 | 2.46E-14    |
| RP4-647J21.1 | HSPB6    | -0.119696781 | 0.012119024 |
| RP4-647J21.1 | FHDC1    | -0.381599185 | 2.44E-17    |
| RP4-647J21.1 | PRR15L   | -0.525721596 | 0           |
| RP4-647J21.1 | SLC1A1   | -0.385169935 | 0           |
| RP4-647J21.1 | BTBD11   | -0.577945744 | 0           |
| RP4-647J21.1 | TRIM58   | -0.413726147 | 0           |
| RP4-647J21.1 | LRIG1    | -0.352502007 | 3.65E-14    |
| RP4-647J21.1 | ROR2     | -0.035719128 | 0.455213198 |
| RP4-647J21.1 | GPR125   | -0.419780464 | 0           |
| RP4-647J21.1 | FLRT1    | -0.437304868 | 0           |
| RP4-647J21.1 | PGF      | -0.332689345 | 1.12E-12    |
| RP4-647J21.1 | DUSP1    | -0.099613919 | 0.036979555 |
| RP4-647J21.1 | PLA2G7   | -0.109815555 | 0.02141642  |
| RP4-647J21.1 | PLSCR4   | -0.336322504 | 6.15E-13    |
| RP4-647J21.1 | FAM46B   | -0.258988077 | 4.14E-08    |
| RP4-647J21.1 | GLDC     | -0.13231135  | 0.005524583 |
| RP4-647J21.1 | ZBTB16   | -0.404148452 | 0           |
| RP4-647J21.1 | OMD      | 0.088163356  | 0.064956713 |
| RP4-647J21.1 | HSD11B2  | -0.484159346 | 0           |
| RP4-647J21.1 | FGL2     | 0.151773673  | 0.001441065 |
| RP4-647J21.1 | CLCNKA   | -0.46823013  | 2.65E-25    |
| RP4-647J21.1 | GATM     | -0.676894306 | 0           |
| RP4-647J21.1 | TNS3     | -0.200103257 | 2.50E-05    |
| RP4-647J21.1 | TOB1     | -0.071962345 | 0.132175118 |
| RP4-647J21.1 | MARC2    | -0.560562186 | 0           |
| RP4-647J21.1 | LRRC2    | -0.451731264 | 0           |
| RP4-647J21.1 | SORD     | -0.391653452 | 0           |
| RP4-647J21.1 | RIMS4    | -0.544232051 | 0           |
| RP4-647J21.1 | SLC29A4  | -0.315785622 | 1.65E-11    |

|              |          |              |             |
|--------------|----------|--------------|-------------|
| RP4-647J21.1 | SLC39A14 | -0.564045564 | 0           |
| RP4-647J21.1 | FAXDC2   | -0.509021267 | 0           |
| RP4-647J21.1 | HSPB8    | -0.04654584  | 0.330422675 |
| RP4-647J21.1 | CCL19    | 0.358570104  | 9.14E-15    |
| RP4-647J21.1 | KCNIP3   | -0.468824766 | 0           |
| RP4-647J21.1 | CGNL1    | -0.470032225 | 0           |
| RP4-647J21.1 | ATF3     | 0.09219144   | 0.053602929 |
| RP4-647J21.1 | SGCD     | -0.092049745 | 0.05397271  |
| RP4-647J21.1 | STARD13  | -0.297033051 | 2.64E-10    |
| RP4-647J21.1 | LDHD     | -0.587880159 | 0           |
| RP4-647J21.1 | RCAN1    | -0.121781077 | 0.010692519 |
| RP4-647J21.1 | ID3      | -0.182111501 | 0.000127747 |
| RP4-647J21.1 | SYTL3    | -0.544563099 | 0           |
| RP4-647J21.1 | MT1E     | -0.23895727  | 4.41E-07    |
| RP4-647J21.1 | CAMK1D   | -0.395998349 | 0           |
| RP4-647J21.1 | PRKCQ    | -0.531324163 | 0           |
| RP4-647J21.1 | NUAK2    | -0.173049669 | 0.000274921 |
| RP4-647J21.1 | LIPG     | -0.555206274 | 0           |
| RP4-647J21.1 | SLC25A25 | -0.235195891 | 6.72E-07    |
| RP4-647J21.1 | PRKX     | -0.26806537  | 1.33E-08    |
| RP4-647J21.1 | SRPX     | 0.059449757  | 0.213718804 |
| RP4-647J21.1 | FAM189A1 | -0.510778913 | 0           |
| RP4-647J21.1 | PLEKHH1  | -0.36155774  | 6.51E-15    |
| RP4-647J21.1 | WNT11    | -0.189483202 | 6.66E-05    |
| RP4-647J21.1 | SNAI1    | -0.083894536 | 0.079114847 |
| RP4-647J21.1 | FDCSP    | 0.281645342  | 1.90E-09    |
| RP4-647J21.1 | MT1X     | -0.463861034 | 0           |
| RP4-647J21.1 | ACACB    | -0.519748551 | 0           |
| RP4-647J21.1 | ARC      | -0.199157062 | 2.73E-05    |
| RP4-647J21.1 | KLK4     | -0.131722618 | 0.005708356 |
| RP4-647J21.1 | ZFPM2    | -0.167711203 | 0.000424483 |
| RP4-647J21.1 | AKAP12   | -0.273353767 | 6.70E-09    |
| RP4-647J21.1 | GJB6     | -0.268916573 | 1.04E-08    |
| RP4-647J21.1 | ERO1LB   | -0.389572276 | 0           |
| RP4-647J21.1 | DNALI1   | -0.248110871 | 1.53E-07    |
| RP4-647J21.1 | HKDC1    | -0.217629079 | 4.42E-06    |
| RP4-647J21.1 | ZFP36L2  | -0.275135525 | 5.31E-09    |
| RP4-647J21.1 | CAPSL    | -0.420619811 | 3.00E-20    |
| RP4-647J21.1 | CYP7B1   | -0.349573496 | 6.21E-14    |
| RP4-647J21.1 | CPQ      | -0.299088838 | 1.97E-10    |
| RP4-647J21.1 | RPS6KA6  | -0.482005849 | 6.40E-27    |
| RP4-647J21.1 | TLE1     | -0.260804585 | 3.31E-08    |
| RP4-647J21.1 | TP53INP2 | -0.385635161 | 0           |
| RP4-647J21.1 | KATNAL2  | -0.560459921 | 0           |
| RP4-647J21.1 | SGPP2    | -0.036361083 | 0.447147188 |
| RP4-647J21.1 | CTH      | -0.311481999 | 3.17E-11    |
| RP4-647J21.1 | KIF12    | -0.194767345 | 4.12E-05    |
| RP4-647J21.1 | TMEM220  | -0.517741414 | 0           |
| RP4-647J21.1 | CENPJ    | -0.145886581 | 0.002201098 |
| RP4-647J21.1 | FAM155B  | -0.362823495 | 5.05E-15    |
| RP4-647J21.1 | WFS1     | -0.362499255 | 5.39E-15    |

|              |          |              |             |
|--------------|----------|--------------|-------------|
| RP4-647J21.1 | SELENBP1 | -0.448075979 | 0           |
| RP4-647J21.1 | SNTA1    | -0.556697833 | 0           |
| RP4-647J21.1 | FRAS1    | -0.088446798 | 0.064112336 |
| RP4-647J21.1 | FBLN7    | -0.299040046 | 1.98E-10    |
| RP4-647J21.1 | AGPAT9   | -0.550077443 | 0           |
| RP4-647J21.1 | GPR83    | -0.375096095 | 3.04E-16    |
| RP4-647J21.1 | PRTG     | -0.474199258 | 0           |
| RP4-647J21.1 | EGR3     | -0.031839599 | 0.505658788 |
| RP4-647J21.1 | GRAMD2   | -0.114736594 | 0.016209491 |
| RP4-647J21.1 | HYOU1    | -0.356204523 | 1.84E-14    |
| RP4-647J21.1 | FBLN5    | -0.003593018 | 0.940137441 |
| RP4-647J21.1 | ITM2A    | -0.293873061 | 4.14E-10    |
| RP4-647J21.1 | SRF      | -0.176286534 | 0.000209963 |
| RP4-647J21.1 | FGFR2    | -0.404203343 | 0           |
| RP4-647J21.1 | MT1A     | -0.051391708 | 0.282636303 |
| RP4-647J21.1 | MAMDC2   | 0.02062936   | 0.666314357 |
| RP4-647J21.1 | FHL2     | -0.133847587 | 0.004997753 |
| RP4-647J21.1 | FTCDNL1  | -0.596368686 | 0           |
| RP4-647J21.1 | PKIA     | -0.436745462 | 0           |
| RP4-647J21.1 | DNAJB4   | -0.361006561 | 7.26E-15    |
| RP4-647J21.1 | SLC25A33 | -0.421585767 | 0           |
| RP4-647J21.1 | EYA2     | -0.355803975 | 1.98E-14    |
| RP4-647J21.1 | LPAR1    | -0.038342123 | 0.422773556 |
| RP4-647J21.1 | STX11    | -0.099229824 | 0.037717089 |
| RP4-647J21.1 | ARHGEF28 | -0.433065639 | 0           |
| RP4-647J21.1 | OR2W3    | -0.406009923 | 0           |
| RP4-647J21.1 | ALDH1B1  | -0.441284691 | 2.40E-22    |
| RP4-647J21.1 | CXCL12   | 0.043659313  | 0.361315659 |
| RP4-647J21.1 | OLFM2    | -0.19510591  | 3.99E-05    |
| RP4-647J21.1 | TUB      | -0.513232837 | 0           |
| RP4-647J21.1 | HTRA3    | 0.067628937  | 0.157140654 |
| RP4-647J21.1 | CKB      | -0.283669298 | 1.70E-09    |
| RP4-647J21.1 | RGS2     | 0.21995535   | 3.47E-06    |
| RP4-647J21.1 | SHANK2   | -0.397036597 | 0           |
| RP4-647J21.1 | CNTFR    | -0.36960099  | 1.17E-15    |
| RP4-647J21.1 | CYTH3    | -0.404563752 | 0           |
| RP4-647J21.1 | PLAC9    | -0.181211686 | 0.000138076 |
| RP4-647J21.1 | WWOX     | -0.601405606 | 0           |
| RP4-647J21.1 | NPR3     | -0.19598842  | 3.68E-05    |
| RP4-647J21.1 | SDC2     | -0.243600167 | 2.59E-07    |
| RP4-647J21.1 | KLF15    | -0.554980469 | 0           |
| RP4-647J21.1 | TMEM164  | -0.338407509 | 4.33E-13    |
| RP4-647J21.1 | LONRF3   | -0.256250337 | 5.78E-08    |
| RP4-647J21.1 | GBP1     | 0.212175867  | 7.69E-06    |
| RP4-647J21.1 | ARHGAP6  | -0.306201829 | 6.97E-11    |
| RP4-647J21.1 | TMEM119  | 0.157339221  | 0.000952334 |
| RP4-647J21.1 | SH3RF1   | -0.445361217 | 0           |
| RP4-647J21.1 | CRELD2   | -0.289477812 | 7.66E-10    |
| RP4-647J21.1 | PCP4     | -0.05889645  | 0.218017588 |
| RP4-647J21.1 | GCSH     | -0.642355971 | 0           |
| RP4-647J21.1 | IMPA2    | -0.435809904 | 0           |

|              |          |              |             |
|--------------|----------|--------------|-------------|
| RP4-647J21.1 | C1R      | 0.328848963  | 2.10E-12    |
| RP4-647J21.1 | SUCNR1   | -0.151355254 | 0.001485841 |
| RP4-647J21.1 | SFRP1    | -0.245173282 | 2.16E-07    |
| RP4-647J21.1 | UGT8     | -0.456290335 | 0           |
| RP4-647J21.1 | TLE4     | 0.067935163  | 0.155266983 |
| RP4-647J21.1 | ANTXR1   | -0.159929876 | 0.000781727 |
| RP4-647J21.1 | GPX3     | -0.340725695 | 2.92E-13    |
| RP4-647J21.1 | DPY19L2  | -0.322909675 | 5.43E-12    |
| RP4-647J21.1 | FAM46C   | -0.299157629 | 1.95E-10    |
| RP4-647J21.1 | IL33     | 0.071846396  | 0.132839012 |
| RP4-647J21.1 | PEG3     | -0.519471685 | 0           |
| RP4-647J21.1 | FAHD2A   | -0.513937768 | 0           |
| RP4-647J21.1 | PTGDS    | 0.109206932  | 0.022151915 |
| RP4-647J21.1 | CHCHD10  | -0.443292806 | 0           |
| RP4-647J21.1 | CD36     | -0.42864798  | 0           |
| RP4-647J21.1 | ANKRD37  | -0.184020345 | 0.000108192 |
| RP4-647J21.1 | TSPAN33  | -0.238290636 | 4.75E-07    |
| RP4-647J21.1 | PRDM16   | -0.447242544 | 0           |
| RP4-647J21.1 | UST      | -0.550689754 | 0           |
| RP4-647J21.1 | NEXN     | -0.285451056 | 1.33E-09    |
| RP4-647J21.1 | NUPR1L   | -0.323067725 | 4.02E-12    |
| RP4-647J21.1 | SLC24A3  | -0.311377182 | 3.22E-11    |
| RP4-647J21.1 | MARC1    | -0.483735678 | 0           |
| RP4-647J21.1 | MYH11    | -0.075865419 | 0.112419017 |
| RP4-647J21.1 | APOA1    | -0.327904552 | 1.83E-12    |
| RP4-647J21.1 | TMEM178B | -0.106068927 | 0.026301721 |
| RP4-647J21.1 | CAPN6    | 0.14422804   | 0.002452431 |
| RP4-647J21.1 | PPM1L    | -0.445923317 | 0           |
| RP4-647J21.1 | FZD8     | -0.381937751 | 1.90E-17    |
| RP4-647J21.1 | RCAN2    | -0.335937416 | 6.56E-13    |
| RP4-647J21.1 | COPZ2    | -0.472793085 | 0           |
| RP4-647J21.1 | GAS1     | 0.010235393  | 0.83059788  |
| RP4-647J21.1 | DACT1    | -0.0943763   | 0.04816319  |
| RP4-647J21.1 | WBSCR17  | -0.300541534 | 1.60E-10    |
| RP4-647J21.1 | NCS1     | -0.307037958 | 6.16E-11    |
| RP4-647J21.1 | SPIRE2   | -0.170365259 | 0.000342576 |
| RP4-647J21.1 | C15orf52 | -0.238081993 | 4.87E-07    |
| RP4-647J21.1 | SPAG5    | -0.057184051 | 0.231713493 |
| RP4-647J21.1 | ARL4D    | -0.317652198 | 1.23E-11    |
| RP4-647J21.1 | FAM189A2 | -0.358541574 | 1.18E-14    |
| RP4-647J21.1 | MAP1LC3A | -0.488714019 | 0           |
| RP4-647J21.1 | KLF6     | 0.132227807  | 0.005554616 |
| RP4-647J21.1 | ADD3     | -0.321112457 | 7.20E-12    |
| RP4-647J21.1 | TSPAN7   | -0.425947685 | 0           |
| RP4-647J21.1 | KLF9     | -0.293060618 | 4.64E-10    |
| RP4-647J21.1 | KCNQ1    | -0.612459115 | 0           |
| RP4-647J21.1 | MAN1A1   | 0.211071806  | 8.59E-06    |
| RP4-647J21.1 | MLF1     | -0.35428107  | 2.63E-14    |
| RP4-647J21.1 | RARB     | -0.344089505 | 1.64E-13    |
| RP4-647J21.1 | CDC42EP2 | -0.231136796 | 1.05E-06    |
| RP4-647J21.1 | FAM3B    | -0.012390324 | 0.795651608 |

|              |          |              |             |
|--------------|----------|--------------|-------------|
| RP4-647J21.1 | GADD45B  | 0.026993592  | 0.572566903 |
| RP4-647J21.1 | TMEM47   | -0.34862035  | 7.37E-14    |
| RP4-647J21.1 | SDF2L1   | -0.29745913  | 2.49E-10    |
| RP4-647J21.1 | CCDC85A  | -0.125708973 | 0.008403469 |
| RP4-647J21.1 | CRYBG3   | -0.189617238 | 6.58E-05    |
| RP4-647J21.1 | FBLN2    | 0.178519334  | 0.000173863 |
| RP4-647J21.1 | PEBP4    | -0.449312941 | 0           |
| RP4-647J21.1 | CDADC1   | -0.557807709 | 0           |
| RP4-647J21.1 | FAM63A   | -0.441381409 | 0           |
| RP4-647J21.1 | GLUL     | -0.078134388 | 0.102049343 |
| RP4-647J21.1 | FREM2    | -0.399426411 | 0           |
| RP4-647J21.1 | ACKR3    | -0.296176496 | 2.99E-10    |
| RP4-647J21.1 | DENND6A  | -0.458688659 | 0           |
| RP4-647J21.1 | CLDN8    | -0.121685479 | 0.010754536 |
| RP4-647J21.1 | UTS2R    | 0.019283013  | 0.687014781 |
| RP4-647J21.1 | SCNN1B   | -0.237539041 | 5.17E-07    |
| RP4-647J21.1 | TTC30A   | -0.391732314 | 0           |
| RP4-647J21.1 | CORO2B   | -0.348210866 | 7.93E-14    |
| RP4-647J21.1 | TC2N     | -0.107714663 | 0.024048623 |
| RP4-647J21.1 | ALDH2    | -0.414129957 | 0           |
| RP4-647J21.1 | GPR183   | 0.227951843  | 1.49E-06    |
| RP4-647J21.1 | C4orf47  | -0.351832252 | 4.13E-14    |
| RP4-647J21.1 | SLC25A42 | -0.550595574 | 0           |
| RP4-647J21.1 | LGMN     | -0.360873093 | 7.46E-15    |
| RP4-647J21.1 | ACSF2    | -0.445308311 | 0           |
| RP4-647J21.1 | KIAA1467 | -0.50714306  | 0           |
| RP4-647J21.1 | PRKG1    | -0.435779126 | 0           |
| RP4-647J21.1 | GNAI1    | -0.405386265 | 0           |
| RP4-647J21.1 | ABCC4    | -0.177140535 | 0.000195398 |
| RP4-647J21.1 | PRPS1    | -0.477040398 | 0           |
| RP4-647J21.1 | TSPAN5   | -0.18628364  | 8.87E-05    |
| RP4-647J21.1 | CR2      | 0.101069324  | 0.034257856 |
| RP4-647J21.1 | CCDC170  | -0.288895997 | 8.30E-10    |
| RP4-647J21.1 | RRAD     | 0.360456801  | 8.10E-15    |
| RP4-647J21.1 | SCGB2A1  | -0.329487372 | 1.90E-12    |
| RP4-647J21.1 | SESN3    | -0.088498143 | 0.063957521 |
| RP4-647J21.1 | SGK223   | -0.084649818 | 0.076445081 |
| RP4-647J21.1 | NDRG2    | -0.506538124 | 0           |
| RP4-647J21.1 | C3orf52  | -0.034197925 | 0.474649201 |
| RP4-647J21.1 | FLRT3    | 0.401593966  | 0           |
| RP4-647J21.1 | MST1R    | 0.551733817  | 0           |
| RP4-647J21.1 | SDC1     | 0.360606439  | 7.86E-15    |
| RP4-647J21.1 | ST8SIA4  | 0.590562583  | 0           |
| RP4-647J21.1 | UBTD1    | 0.191678416  | 5.46E-05    |
| RP4-647J21.1 | EPHA2    | 0.430444489  | 0           |
| RP4-647J21.1 | TMEM130  | 0.299667817  | 1.81E-10    |
| RP4-647J21.1 | SPINK2   | 0.233883189  | 7.78E-07    |
| RP4-647J21.1 | MMP16    | 0.614852192  | 0           |
| RP4-647J21.1 | SIGLEC15 | 0.45698789   | 0           |
| RP4-647J21.1 | RIN1     | 0.514798435  | 0           |
| RP4-647J21.1 | IL1RN    | 0.476673891  | 0           |

|              |          |              |             |
|--------------|----------|--------------|-------------|
| RP4-647J21.1 | FCER1G   | 0.564560291  | 0           |
| RP4-647J21.1 | CD276    | 0.590423015  | 0           |
| RP4-647J21.1 | CTSB     | 0.063790682  | 0.182095118 |
| RP4-647J21.1 | FAM171A2 | -0.014508236 | 0.761699143 |
| RP4-647J21.1 | ASPHD1   | 0.437947957  | 0           |
| RP4-647J21.1 | C15orf48 | 0.4599503    | 0           |
| RP4-647J21.1 | DYSF     | 0.166938332  | 0.000451563 |
| RP4-647J21.1 | PDZRN4   | 0.142820488  | 0.002728258 |
| RP4-647J21.1 | EFHD2    | 0.32118139   | 7.13E-12    |
| RP4-647J21.1 | ASF1B    | 0.398165195  | 0           |
| RP4-647J21.1 | AQP1     | 0.115480246  | 0.015527931 |
| RP4-647J21.1 | ARRDC2   | 0.431321752  | 0           |
| RP4-647J21.1 | PRSS1    | 0.210261716  | 8.88E-06    |
| RP4-647J21.1 | MAPK13   | 0.486379948  | 0           |
| RP4-647J21.1 | CST5     | 0.590334356  | 1.41E-42    |
| RP4-647J21.1 | AHR      | 0.535112633  | 0           |
| RP4-647J21.1 | BAX      | 0.499086853  | 0           |
| RP4-647J21.1 | C1orf115 | 0.004575099  | 0.923819222 |
| RP4-647J21.1 | PLK3     | 0.481757192  | 0           |
| RP4-647J21.1 | JAG2     | 0.282421273  | 2.01E-09    |
| RP4-647J21.1 | RAD23B   | 0.151682188  | 0.001450748 |
| RP4-647J21.1 | CA12     | -0.111828224 | 0.01913316  |
| RP4-647J21.1 | ADTRP    | 0.180325062  | 0.000149016 |
| RP4-647J21.1 | UCP2     | 0.361588377  | 6.47E-15    |
| RP4-647J21.1 | IGFBP2   | 0.164838008  | 0.000533492 |
| RP4-647J21.1 | LOXL2    | 0.372072127  | 6.65E-16    |
| RP4-647J21.1 | GPX1     | 0.38385397   | 0           |
| RP4-647J21.1 | P3H3     | 0.383018124  | 4.74E-18    |
| RP4-647J21.1 | C2orf81  | 0.23672759   | 5.67E-07    |
| RP4-647J21.1 | CDT1     | 0.309925621  | 4.00E-11    |
| RP4-647J21.1 | SNX25    | 0.35145922   | 4.42E-14    |
| RP4-647J21.1 | MTHFD1L  | 0.439677945  | 0           |
| RP4-647J21.1 | CDC42BPG | 0.454213643  | 9.87E-24    |
| RP4-647J21.1 | MSN      | 0.296226139  | 2.97E-10    |
| RP4-647J21.1 | SIGLEC6  | 0.504113483  | 1.13E-29    |
| RP4-647J21.1 | F2R      | 0.437118777  | 0           |
| RP4-647J21.1 | TMEM184A | 0.504337238  | 0           |
| RP4-647J21.1 | CKS2     | 0.350730461  | 5.04E-14    |
| RP4-647J21.1 | TAX1BP3  | 0.501020234  | 0           |
| RP4-647J21.1 | PMEP1    | 0.423455039  | 0           |
| RP4-647J21.1 | CXCL16   | 0.666034262  | 0           |
| RP4-647J21.1 | FAXC     | 0.596831075  | 0           |
| RP4-647J21.1 | VTCN1    | 0.609814685  | 4.65E-46    |
| RP4-647J21.1 | SH2D4A   | 0.445034849  | 0           |
| RP4-647J21.1 | RNF24    | 0.223509363  | 2.39E-06    |
| RP4-647J21.1 | LY6G6C   | 0.405070608  | 9.16E-19    |
| RP4-647J21.1 | NID1     | 0.443504852  | 0           |
| RP4-647J21.1 | STAC     | 0.606415719  | 0           |
| RP4-647J21.1 | RAB34    | 0.336434271  | 6.04E-13    |
| RP4-647J21.1 | HES4     | 0.303206087  | 1.08E-10    |
| RP4-647J21.1 | EPHA10   | 0.316260776  | 1.53E-11    |

|              |          |              |             |
|--------------|----------|--------------|-------------|
| RP4-647J21.1 | ENTPD2   | 0.180720788  | 0.000144036 |
| RP4-647J21.1 | DDB2     | 0.468844481  | 0           |
| RP4-647J21.1 | NKAIN4   | 0.516830394  | 0           |
| RP4-647J21.1 | TRIM29   | 0.534058357  | 0           |
| RP4-647J21.1 | ADCY8    | 0.297937665  | 1.89E-10    |
| RP4-647J21.1 | SFTA2    | 0.436564336  | 0           |
| RP4-647J21.1 | NRIP1    | 0.392300229  | 0           |
| RP4-647J21.1 | VWA1     | 0.197515439  | 3.19E-05    |
| RP4-647J21.1 | APLNR    | 0.197119572  | 3.31E-05    |
| RP4-647J21.1 | REN      | 0.314803906  | 1.48E-11    |
| RP4-647J21.1 | EDIL3    | 0.194623664  | 4.17E-05    |
| RP4-647J21.1 | AGRN     | 0.296701861  | 2.77E-10    |
| RP4-647J21.1 | TREM1    | 0.550585078  | 0           |
| RP4-647J21.1 | SRL      | 0.374620089  | 3.47E-16    |
| RP4-647J21.1 | RASGRF1  | 0.546969224  | 0           |
| RP4-647J21.1 | RMI2     | 0.352462009  | 3.68E-14    |
| RP4-647J21.1 | SAMD1    | 0.343233092  | 1.90E-13    |
| RP4-647J21.1 | MGAT4B   | 0.319567851  | 9.17E-12    |
| RP4-647J21.1 | NXN      | 0.633503632  | 0           |
| RP4-647J21.1 | SH3BGRL3 | 0.528778754  | 0           |
| RP4-647J21.1 | CA11     | 0.053392319  | 0.264179691 |
| RP4-647J21.1 | PLD3     | 0.1928029    | 4.93E-05    |
| RP4-647J21.1 | LURAP1L  | 0.287573791  | 9.97E-10    |
| RP4-647J21.1 | CARNS1   | 0.047770178  | 0.317850186 |
| RP4-647J21.1 | PDLIM7   | 0.389911692  | 0           |
| RP4-647J21.1 | BCL2L1   | 0.66781063   | 0           |
| RP4-647J21.1 | GGT6     | 0.19509357   | 3.99E-05    |
| RP4-647J21.1 | DPYSL3   | 0.590442589  | 0           |
| RP4-647J21.1 | FYN      | 0.473398872  | 0           |
| RP4-647J21.1 | TK1      | 0.395494969  | 0           |
| RP4-647J21.1 | AK1      | 0.181907965  | 0.000130018 |
| RP4-647J21.1 | HIGD1B   | -0.040354933 | 0.398822541 |
| RP4-647J21.1 | TMEM59L  | 0.451888278  | 0           |
| RP4-647J21.1 | MEGF9    | 0.218997524  | 3.83E-06    |
| RP4-647J21.1 | ZFP36L1  | 0.509078569  | 0           |
| RP4-647J21.1 | ADRA1B   | 0.308378036  | 5.05E-11    |
| RP4-647J21.1 | EPHA4    | 0.527281238  | 0           |
| RP4-647J21.1 | TCERG1L  | 0.28340846   | 1.76E-09    |
| RP4-647J21.1 | NGFR     | 0.12538374   | 0.008574863 |
| RP4-647J21.1 | EBI3     | 0.61861896   | 0           |
| RP4-647J21.1 | S100A10  | 0.712811864  | 0           |
| RP4-647J21.1 | S100B    | 0.530864327  | 0           |
| RP4-647J21.1 | CD44     | 0.15754687   | 0.000937485 |
| RP4-647J21.1 | BHLHE41  | 0.12865493   | 0.006984889 |
| RP4-647J21.1 | FBX02    | 0.279436311  | 3.00E-09    |
| RP4-647J21.1 | SLC30A2  | 0.321246635  | 7.05E-12    |
| RP4-647J21.1 | FRMD5    | 0.434974767  | 0           |
| RP4-647J21.1 | SAMD11   | 0.184413518  | 0.00010453  |
| RP4-647J21.1 | SIPA1L2  | 0.373633754  | 4.50E-16    |
| RP4-647J21.1 | S100A16  | 0.486547315  | 0           |
| RP4-647J21.1 | PPL      | 0.45979045   | 0           |

|              |          |             |             |
|--------------|----------|-------------|-------------|
| RP4-647J21.1 | ARHGDIB  | 0.49533909  | 0           |
| RP4-647J21.1 | CDC42EP3 | 0.670526953 | 0           |
| RP4-647J21.1 | RUNX2    | 0.449583283 | 0           |
| RP4-647J21.1 | LAMC2    | 0.488875005 | 0           |
| RP4-647J21.1 | BRINP1   | 0.188385099 | 7.35E-05    |
| RP4-647J21.1 | GPRC5B   | 0.183969426 | 0.000108675 |
| RP4-647J21.1 | AQP5     | 0.38681326  | 0           |
| RP4-647J21.1 | PLAG1    | 0.208491647 | 1.11E-05    |
| RP4-647J21.1 | PTPRU    | 0.516496084 | 0           |
| RP4-647J21.1 | ANGPTL4  | 0.373161436 | 5.07E-16    |
| RP4-647J21.1 | PALM3    | 0.142624469 | 0.002765587 |
| RP4-647J21.1 | ACP5     | 0.566195673 | 0           |
| RP4-647J21.1 | DLG4     | 0.124469742 | 0.009073335 |
| RP4-647J21.1 | ETNK2    | 0.254910827 | 6.81E-08    |
| RP4-647J21.1 | CD109    | 0.602682424 | 0           |
| RP4-647J21.1 | SNX22    | 0.248577657 | 1.45E-07    |
| RP4-647J21.1 | TMEM98   | 0.292105203 | 5.31E-10    |
| RP4-647J21.1 | CTHRC1   | 0.540820017 | 0           |
| RP4-647J21.1 | S100A2   | 0.563015826 | 0           |
| RP4-647J21.1 | C11orf80 | 0.485127668 | 0           |
| RP4-647J21.1 | SREBF1   | 0.571405918 | 0           |
| RP4-647J21.1 | PRSS22   | 0.460738773 | 0           |
| RP4-647J21.1 | CMTM3    | 0.605382294 | 0           |
| RP4-647J21.1 | RDH5     | 0.139231583 | 0.003489924 |
| RP4-647J21.1 | MYH10    | 0.450602382 | 0           |
| RP4-647J21.1 | EVPL     | 0.449214364 | 0           |
| RP4-647J21.1 | SCD      | 0.490917459 | 0           |
| RP4-647J21.1 | CD151    | 0.395552697 | 0           |
| RP4-647J21.1 | S100A4   | 0.619343181 | 0           |
| RP4-647J21.1 | BNIP1    | 0.192827864 | 4.92E-05    |
| RP4-647J21.1 | MAP3K6   | 0.416747277 | 0           |
| RP4-647J21.1 | MANEAL   | 0.116436654 | 0.014688437 |
| RP4-647J21.1 | CD207    | 0.455920747 | 6.41E-24    |
| RP4-647J21.1 | CD1A     | 0.502538733 | 1.80E-29    |
| RP4-647J21.1 | C3       | 0.616466865 | 0           |
| RP4-647J21.1 | NT5E     | 0.583186059 | 0           |
| RP4-647J21.1 | CACNG4   | 0.560420888 | 1.14E-37    |
| RP4-647J21.1 | FHOD1    | 0.353062406 | 3.30E-14    |
| RP4-647J21.1 | LEMD1    | 0.412719387 | 0           |
| RP4-647J21.1 | ATP11A   | 0.471481943 | 0           |
| RP4-647J21.1 | PPAP2C   | 0.325280483 | 3.73E-12    |
| RP4-647J21.1 | DRAM1    | 0.751239231 | 0           |
| RP4-647J21.1 | CDA      | 0.229523115 | 1.25E-06    |
| RP4-647J21.1 | CCND2    | 0.13605046  | 0.004321238 |
| RP4-647J21.1 | LCN6     | 0.159256793 | 0.000811966 |
| RP4-647J21.1 | CDH4     | 0.192107757 | 5.25E-05    |
| RP4-647J21.1 | MMP11    | 0.586339099 | 0           |
| RP4-647J21.1 | B3GAT1   | 0.236038687 | 6.12E-07    |
| RP4-647J21.1 | SPP1     | 0.416507005 | 0           |
| RP4-647J21.1 | HLA-DQB1 | 0.440005588 | 0           |
| RP4-647J21.1 | SDC3     | 0.524628741 | 0           |



|              |          |             |             |
|--------------|----------|-------------|-------------|
| RP4-647J21.1 | CX3CL1   | 0.586934673 | 0           |
| RP4-647J21.1 | SDK1     | 0.528687978 | 0           |
| RP4-647J21.1 | DOCK9    | 0.345941614 | 1.18E-13    |
| RP4-647J21.1 | CSF2     | 0.645182476 | 4.89E-53    |
| RP4-647J21.1 | GRHL3    | 0.662444506 | 0           |
| RP4-647J21.1 | TMEM92   | 0.569135262 | 4.78E-39    |
| RP4-647J21.1 | BASP1    | 0.58064221  | 0           |
| RP4-647J21.1 | HRH1     | 0.634131687 | 0           |
| RP4-647J21.1 | ESM1     | 0.162893846 | 0.000621445 |
| RP4-647J21.1 | B4GALNT3 | 0.23050165  | 1.13E-06    |
| RP4-647J21.1 | LMO3     | 0.275056238 | 5.36E-09    |
| RP4-647J21.1 | C9orf16  | 0.351843599 | 4.12E-14    |
| RP4-647J21.1 | SEMA3F   | 0.213441905 | 6.77E-06    |
| RP4-647J21.1 | PLA2G12B | 0.09342062  | 0.050455938 |
| RP4-647J21.1 | KLK6     | 0.391383582 | 1.61E-17    |
| RP4-647J21.1 | ST3GAL5  | 0.235808486 | 6.28E-07    |
| RP4-647J21.1 | FAM132B  | 0.012443797 | 0.794789317 |
| RP4-647J21.1 | CDKN1A   | 0.38694375  | 0           |
| RP4-647J21.1 | E2F1     | 0.323001302 | 5.35E-12    |
| RP4-647J21.1 | B3GNT8   | 0.32963389  | 1.85E-12    |
| RP4-647J21.1 | MTMR11   | 0.593620875 | 0           |
| RP4-647J21.1 | MYO1G    | 0.964237611 | 0           |
| RP4-647J21.1 | TMSB10   | 0.604590275 | 0           |
| RP4-647J21.1 | UNC5CL   | 0.530192445 | 0           |
| RP4-647J21.1 | ABR      | 0.546838592 | 0           |
| RP4-647J21.1 | PLP2     | 0.524957094 | 0           |
| RP4-647J21.1 | SRCIN1   | 0.108883401 | 0.022551734 |
| RP4-647J21.1 | PDE9A    | 0.499527682 | 0           |
| RP4-647J21.1 | TREM2    | 0.471439959 | 0           |
| RP4-647J21.1 | KDELR3   | 0.555884113 | 0           |
| RP4-647J21.1 | PC       | 0.118179974 | 0.013260415 |
| RP4-647J21.1 | C2CD4A   | 0.429805513 | 0           |
| RP4-647J21.1 | PELI1    | 0.768042818 | 0           |
| RP4-647J21.1 | SSX1     | 0.436847017 | 0           |
| RP4-647J21.1 | MROH6    | 0.513848126 | 0           |
| RP4-647J21.1 | ESPN     | 0.334685703 | 8.08E-13    |
| RP4-647J21.1 | BMP1     | 0.397473313 | 0           |
| RP4-647J21.1 | TM4SF4   | 0.473575511 | 6.37E-26    |
| RP4-647J21.1 | CORO2A   | 0.41502268  | 0           |
| RP4-647J21.1 | CD164L2  | 0.247185535 | 1.55E-07    |
| RP4-647J21.1 | CTSS     | 0.62297024  | 0           |
| RP4-647J21.1 | CLU      | 0.368457833 | 1.54E-15    |
| RP4-647J21.1 | TMSB4X   | 0.69000417  | 0           |
| RP4-647J21.1 | WNT10A   | 0.527588263 | 7.96E-33    |
| RP4-647J21.1 | NAPSA    | 0.70969939  | 0           |
| RP4-647J21.1 | PLEKHA4  | 0.23475109  | 7.06E-07    |
| RP4-647J21.1 | SFTPA1   | 0.413031205 | 1.63E-19    |
| RP4-647J21.1 | C1orf116 | 0.573614606 | 0           |
| RP4-647J21.1 | TM4SF1   | 0.585749056 | 0           |
| RP4-647J21.1 | SEL1L3   | 0.583922194 | 0           |
| RP4-647J21.1 | VASN     | 0.387697047 | 0           |

|              |          |             |             |
|--------------|----------|-------------|-------------|
| RP4-647J21.1 | NPTXR    | 0.275243038 | 5.24E-09    |
| RP4-647J21.1 | PDE4C    | 0.492471143 | 0           |
| RP4-647J21.1 | CDC42EP1 | 0.53338066  | 0           |
| RP4-647J21.1 | ENDOD1   | 0.355364564 | 2.15E-14    |
| RP4-647J21.1 | RYR1     | 0.46632361  | 0           |
| RP4-647J21.1 | IL1RAP   | 0.495309588 | 0           |
| RP4-647J21.1 | SLC35F2  | 0.403841177 | 1.19E-18    |
| RP4-647J21.1 | ISYNA1   | 0.339899211 | 3.37E-13    |
| RP4-647J21.1 | HLA-G    | 0.63873799  | 0           |
| RP4-647J21.1 | CDKN2B   | 0.491531472 | 0           |
| RP4-647J21.1 | ALDH1A3  | 0.617126124 | 0           |
| RP4-647J21.1 | CLIP3    | 0.437975048 | 0           |
| RP4-647J21.1 | ULBP2    | 0.328482882 | 2.23E-12    |
| RP4-647J21.1 | ETHE1    | 0.512804347 | 0           |
| RP4-647J21.1 | XPR1     | 0.580173722 | 0           |
| RP4-647J21.1 | SPTBN2   | 0.364563837 | 3.54E-15    |
| RP4-647J21.1 | IVL      | 0.688664119 | 5.38E-63    |
| RP4-647J21.1 | MARCO    | 0.572367716 | 0           |
| RP4-647J21.1 | PLXND1   | 0.367778859 | 1.79E-15    |
| RP4-647J21.1 | EMILIN2  | 0.527680935 | 0           |
| RP4-647J21.1 | PLAUR    | 0.73455805  | 0           |
| RP4-647J21.1 | CDC42EP5 | 0.471385777 | 0           |
| RP4-647J21.1 | TRPC5    | 0.150771101 | 0.001534243 |
| RP4-647J21.1 | TMEM100  | 0.452506404 | 0           |
| RP4-647J21.1 | QSOX1    | 0.559258419 | 0           |
| RP4-647J21.1 | ARHGAP23 | 0.498319656 | 0           |
| RP4-647J21.1 | MDFI     | 0.654711404 | 0           |
| RP4-647J21.1 | FSTL3    | 0.445496104 | 0           |
| RP4-647J21.1 | INF2     | 0.265322382 | 1.88E-08    |
| RP4-647J21.1 | TGFBR1   | 0.320024566 | 8.54E-12    |
| RP4-647J21.1 | TGFBI    | 0.426197176 | 0           |
| RP4-647J21.1 | ERBB3    | 0.429949336 | 0           |
| RP4-647J21.1 | CCL18    | 0.551770127 | 0           |
| RP4-647J21.1 | CCL17    | 0.594117539 | 3.10E-43    |
| RP4-647J21.1 | C16orf45 | 0.226852748 | 1.67E-06    |
| RP4-647J21.1 | PRDM1    | 0.332150223 | 1.23E-12    |
| RP4-647J21.1 | TRIM47   | 0.497528772 | 0           |
| RP4-647J21.1 | CNFN     | 0.300310907 | 1.65E-10    |
| RP4-647J21.1 | ARMCX3   | 0.086285059 | 0.070915645 |
| RP4-647J21.1 | RAMP1    | 0.254629706 | 7.04E-08    |
| RP4-647J21.1 | GABRD    | 0.08802228  | 0.065404191 |
| RP4-647J21.1 | COL13A1  | 0.265055444 | 1.94E-08    |
| RP4-647J21.1 | S100A5   | 0.308565403 | 4.91E-11    |
| RP4-647J21.1 | MISP     | 0.597820672 | 0           |
| RP4-647J21.1 | HES6     | 0.100648763 | 0.035053159 |
| RP4-647J21.1 | PSD3     | 0.316740753 | 1.42E-11    |
| RP4-647J21.1 | DOK7     | 0.386823189 | 0           |
| RP4-647J21.1 | ZMAT3    | 0.472936908 | 0           |
| RP4-647J21.1 | MFAP2    | 0.401912816 | 0           |
| RP4-647J21.1 | TMEM79   | 0.418214441 | 0           |
| RP4-647J21.1 | SLC1A5   | 0.451793389 | 0           |

|              |           |             |             |
|--------------|-----------|-------------|-------------|
| RP4-647J21.1 | BBC3      | 0.491043411 | 0           |
| RP4-647J21.1 | HLA-DQB2  | 0.508186981 | 0           |
| RP4-647J21.1 | C1QL1     | 0.191137023 | 5.74E-05    |
| RP4-647J21.1 | TMEM215   | 0.036417437 | 0.446593128 |
| RP4-647J21.1 | PNP       | 0.484382739 | 0           |
| RP4-647J21.1 | ARNTL     | 0.42966325  | 0           |
| RP4-647J21.1 | CLDN2     | 0.113821394 | 0.017042866 |
| RP4-647J21.1 | MVP       | 0.602513779 | 0           |
| RP4-647J21.1 | LGALS1    | 0.545307035 | 0           |
| RP4-647J21.1 | BIRC7     | 0.410184906 | 3.03E-19    |
| RP4-647J21.1 | COL8A1    | 0.377848161 | 1.33E-16    |
| RP4-647J21.1 | PERP      | 0.527112026 | 0           |
| RP4-647J21.1 | GJA4      | 0.285638849 | 1.30E-09    |
| RP4-647J21.1 | IGFL2     | 0.592016523 | 7.22E-43    |
| RP4-647J21.1 | DAPK2     | 0.29835398  | 2.19E-10    |
| RP4-647J21.1 | MAMLD1    | 0.460242768 | 0           |
| RP4-647J21.1 | ETV5      | 0.156307355 | 0.001029398 |
| RP4-647J21.1 | RUNX1     | 0.683290309 | 0           |
| RP4-647J21.1 | LONRF2    | 0.077842913 | 0.103337324 |
| RP4-647J21.1 | SPOCK1    | 0.188158443 | 7.50E-05    |
| RP4-647J21.1 | XKRX      | 0.426644531 | 0           |
| RP4-647J21.1 | TGFB1     | 0.468987028 | 0           |
| RP4-647J21.1 | ERP27     | 0.315391598 | 1.75E-11    |
| RP4-647J21.1 | TNFRSF10C | 0.379501272 | 7.21E-17    |
| RP4-647J21.1 | PALM      | 0.383776811 | 0           |
| RP4-647J21.1 | TSC22D1   | 0.237064454 | 5.46E-07    |
| RP4-647J21.1 | TGM2      | 0.679641975 | 0           |
| RP4-647J21.1 | UBE2QL1   | 0.032828488 | 0.492527852 |
| RP4-647J21.1 | ECE1      | 0.465947316 | 0           |
| RP4-647J21.1 | COL8A2    | 0.668689311 | 0           |
| RP4-647J21.1 | HIST3H2A  | 0.377586471 | 1.45E-16    |
| RP4-647J21.1 | TNFRSF21  | 0.585029658 | 0           |
| RP4-647J21.1 | SOX4      | 0.602570656 | 0           |
| RP4-647J21.1 | ELF3      | 0.62708607  | 0           |
| RP4-647J21.1 | TPD52L1   | 0.113770258 | 0.017134229 |
| RP4-647J21.1 | INHBB     | 0.299513924 | 1.85E-10    |
| RP4-647J21.1 | HPN       | 0.237202745 | 5.37E-07    |
| RP4-647J21.1 | MMP7      | 0.569328425 | 4.45E-39    |
| RP4-647J21.1 | RAB27A    | 0.303696417 | 1.01E-10    |
| RP4-647J21.1 | IGF2BP2   | 0.335241279 | 7.37E-13    |
| RP4-647J21.1 | ITGB4     | 0.745901191 | 0           |
| RP4-647J21.1 | PPP1R1B   | 0.525264597 | 0           |
| RP4-647J21.1 | NPDC1     | 0.23386092  | 7.80E-07    |
| RP4-647J21.1 | CCL13     | 0.601664034 | 1.42E-44    |
| RP4-647J21.1 | SPINT1    | 0.429065265 | 0           |
| RP4-647J21.1 | HEY2      | 0.245718788 | 2.03E-07    |
| RP4-647J21.1 | CST2      | 0.613537524 | 9.43E-47    |
| RP4-647J21.1 | ADM       | 0.08080589  | 0.090829534 |
| RP4-647J21.1 | VSTM2L    | 0.480349742 | 0           |
| RP4-647J21.1 | FAM84A    | 0.635126249 | 0           |
| RP4-647J21.1 | P4HA2     | 0.228096092 | 1.46E-06    |

|              |            |             |             |
|--------------|------------|-------------|-------------|
| RP4-647J21.1 | LPL        | 0.498818355 | 0           |
| RP4-647J21.1 | TMEM173    | 0.734272248 | 0           |
| RP4-647J21.1 | DHRS3      | 0.324065081 | 4.52E-12    |
| RP4-647J21.1 | SCN1B      | 0.387671517 | 0           |
| RP4-647J21.1 | GLT1D1     | 0.142904172 | 0.002712462 |
| RP4-647J21.1 | PHYHIP     | 0.363538071 | 4.37E-15    |
| RP4-647J21.1 | BHLHE40    | 0.576616731 | 0           |
| RP4-647J21.1 | BID        | 0.430771849 | 0           |
| RP4-647J21.1 | POSTN      | 0.418027216 | 0           |
| RP4-647J21.1 | ITGA3      | 0.501801615 | 0           |
| RP4-647J21.1 | RSPO4      | 0.365481523 | 2.92E-15    |
| RP4-647J21.1 | ADAMTS9    | 0.175615786 | 0.00022211  |
| RP4-647J21.1 | ABTB2      | 0.458200456 | 0           |
| RP4-647J21.1 | KCNQ3      | 0.571396131 | 0           |
| RP4-647J21.1 | ANXA1      | 0.333619797 | 9.64E-13    |
| RP4-647J21.1 | S100A11    | 0.627000684 | 0           |
| RP4-647J21.1 | CEACAM6    | 0.689017362 | 4.40E-63    |
| RP4-647J21.1 | IER5L      | 0.257985714 | 4.68E-08    |
| RP4-647J21.1 | KRT80      | 0.475234528 | 0           |
| RP4-647J21.1 | CDH6       | 0.669374668 | 0           |
| RP4-647J21.1 | UNC5B      | 0.282102707 | 2.10E-09    |
| RP4-647J21.1 | PLEKHN1    | 0.545865306 | 0           |
| RP4-647J21.1 | SYTL1      | 0.546140186 | 0           |
| RP4-647J21.1 | TMEM163    | 0.648037825 | 0           |
| RP4-647J21.1 | C4orf48    | 0.245542343 | 2.07E-07    |
| RP4-647J21.1 | B3GNT7     | 0.330190459 | 1.69E-12    |
| RP4-647J21.1 | BAIAP3     | 0.350091769 | 5.66E-14    |
| RP4-647J21.1 | PHLDA2     | 0.371358828 | 7.90E-16    |
| RP4-647J21.1 | GAP43      | 0.463374398 | 9.45E-25    |
| RP4-647J21.1 | S100A1     | 0.221891001 | 2.84E-06    |
| RP4-647J21.1 | PTPRE      | 0.567097757 | 0           |
| RP4-647J21.1 | CCND1      | 0.473035343 | 0           |
| RP4-647J21.1 | ST6GALNAC5 | 0.660562654 | 2.28E-56    |
| RP4-647J21.1 | KRT17      | 0.567163286 | 0           |
| RP4-647J21.1 | HPCAL4     | 0.223436458 | 2.41E-06    |
| RP4-647J21.1 | GABBR2     | 0.258750784 | 4.26E-08    |
| RP4-647J21.1 | DIRAS3     | 0.149760012 | 0.001668534 |
| RP4-647J21.1 | SERINC2    | 0.221450171 | 2.97E-06    |
| RP4-647J21.1 | PTCHD4     | 0.467438166 | 0           |
| RP4-647J21.1 | EPS8       | 0.199425134 | 2.66E-05    |
| RP4-647J21.1 | LY6E       | 0.444167941 | 0           |
| RP4-647J21.1 | UPP1       | 0.538057455 | 0           |
| RP4-647J21.1 | AHNAK2     | 0.581430399 | 0           |
| RP4-647J21.1 | PLXNC1     | 0.294154324 | 3.98E-10    |
| RP4-647J21.1 | TNC        | 0.497959815 | 0           |
| RP4-647J21.1 | DUSP4      | 0.466944431 | 0           |
| RP4-647J21.1 | NRCAM      | 0.279023423 | 3.17E-09    |
| RP4-647J21.1 | NRP2       | 0.478338491 | 0           |
| RP4-647J21.1 | CTSC       | 0.687495639 | 0           |
| RP4-647J21.1 | AMIGO2     | 0.460265462 | 0           |
| RP4-647J21.1 | NAB2       | 0.182323406 | 0.000125422 |

|              |         |              |             |
|--------------|---------|--------------|-------------|
| RP4-647J21.1 | TBC1D2  | 0.509546632  | 0           |
| RP4-647J21.1 | PHLDA3  | 0.456963919  | 0           |
| RP4-647J21.1 | PTP4A3  | 0.4643881    | 0           |
| RP4-647J21.1 | CRABP2  | 0.329140297  | 2.01E-12    |
| RP4-647J21.1 | GOS2    | 0.270483835  | 9.72E-09    |
| RP4-647J21.1 | S100A6  | 0.502758874  | 0           |
| RP4-647J21.1 | FOXQ1   | 0.614013083  | 0           |
| RP4-647J21.1 | LRG1    | 0.52489426   | 0           |
| RP4-647J21.1 | LAMP5   | 0.510939756  | 0           |
| RP4-647J21.1 | ALDH3B1 | 0.575369131  | 0           |
| RP4-647J21.1 | CDH2    | -0.019883722 | 0.67768556  |
| RP4-647J21.1 | SCG5    | 0.116251415  | 0.014847845 |
| RP4-647J21.1 | ZCCHC16 | 0.107235145  | 0.024646268 |
| RP4-647J21.1 | GRB7    | 0.457941035  | 0           |
| RP4-647J21.1 | TIAM1   | 0.476338588  | 0           |
| RP4-647J21.1 | FXD5    | 0.551801899  | 0           |
| RP4-647J21.1 | CLDN9   | 0.203349484  | 1.83E-05    |
| RP4-647J21.1 | FAM43A  | 0.221327482  | 3.01E-06    |
| RP4-647J21.1 | CHST2   | 0.471746469  | 0           |
| RP4-647J21.1 | HMGA2   | 0.38856892   | 0           |
| RP4-647J21.1 | GALNT7  | 0.248033996  | 1.55E-07    |
| RP4-647J21.1 | CBLN1   | 0.588190215  | 0           |
| RP4-647J21.1 | STRA6   | 0.618425211  | 0           |
| RP4-647J21.1 | MUC21   | 0.545070937  | 2.45E-35    |
| RP4-647J21.1 | PRR36   | 0.389989986  | 0           |
| RP4-647J21.1 | NFE2L3  | 0.766676217  | 0           |
| RP4-647J21.1 | NR1D1   | 0.234218208  | 7.49E-07    |
| RP4-647J21.1 | MUC1    | 0.627738946  | 0           |
| RP4-647J21.1 | NAT8L   | 0.10794756   | 0.023743661 |
| RP4-647J21.1 | APOC1   | 0.410810117  | 0           |
| RP4-647J21.1 | EVA1A   | 0.561335624  | 0           |
| RP4-647J21.1 | ENTPD1  | 0.155692491  | 0.001078015 |
| RP4-647J21.1 | COL1A1  | 0.587532658  | 0           |
| RP4-647J21.1 | FNDC4   | 0.54635975   | 0           |
| RP4-647J21.1 | FRMD3   | 0.02450279   | 0.608514746 |
| RP4-647J21.1 | SHROOM4 | 0.450227649  | 0           |
| RP4-647J21.1 | NELL2   | 0.302862273  | 1.14E-10    |
| RP4-647J21.1 | EPHB3   | 0.591939963  | 0           |
| RP4-647J21.1 | TMC6    | 0.474828732  | 0           |
| RP4-647J21.1 | NOD1    | 0.410117952  | 0           |
| RP4-647J21.1 | GGCT    | 0.265118278  | 1.93E-08    |
| RP4-647J21.1 | ICAM1   | 0.691525231  | 0           |
| RP4-647J21.1 | PRSS23  | 0.664734325  | 0           |
| RP4-647J21.1 | CFI     | 0.693219192  | 0           |
| RP4-647J21.1 | CD55    | 0.63406162   | 0           |
| RP4-647J21.1 | RASD2   | 0.364897721  | 3.30E-15    |
| RP4-647J21.1 | KLK11   | 0.378233853  | 2.23E-16    |
| RP4-647J21.1 | ICAM5   | 0.457782462  | 0           |
| RP4-647J21.1 | ADORA1  | 0.255718873  | 6.17E-08    |
| RP4-647J21.1 | ITGA2   | 0.580171453  | 0           |
| RP4-647J21.1 | ABCC3   | 0.255692491  | 6.19E-08    |

|              |           |              |             |
|--------------|-----------|--------------|-------------|
| RP4-647J21.1 | MFGE8     | 0.390614779  | 0           |
| RP4-647J21.1 | STK32A    | 0.20632622   | 1.37E-05    |
| RP4-647J21.1 | CYSLTR2   | 0.532765938  | 0           |
| RP4-647J21.1 | LAD1      | 0.312265508  | 2.81E-11    |
| RP4-647J21.1 | MGAT3     | 0.585998122  | 0           |
| RP4-647J21.1 | IGFBP6    | 0.440479183  | 0           |
| RP4-647J21.1 | CYP2S1    | 0.674252589  | 0           |
| RP4-647J21.1 | KCNJ2     | 0.511453774  | 0           |
| RP4-647J21.1 | FAM20A    | 0.731097791  | 0           |
| RP4-647J21.1 | TGFA      | 0.303337286  | 1.06E-10    |
| RP4-647J21.1 | MXRA8     | 0.493306422  | 0           |
| RP4-647J21.1 | C8orf4    | 0.632151357  | 0           |
| RP4-647J21.1 | CLDN10    | 0.508371394  | 3.16E-30    |
| RP4-647J21.1 | PDE5A     | 0.315883489  | 1.62E-11    |
| RP4-647J21.1 | APOE      | 0.306156724  | 7.02E-11    |
| RP4-647J21.1 | SPOCK2    | 0.587143599  | 0           |
| RP4-647J21.1 | TENM1     | 0.215158276  | 5.69E-06    |
| RP4-647J21.1 | SLIT1     | 0.264475614  | 2.09E-08    |
| RP4-647J21.1 | CXCL14    | 0.646715194  | 0           |
| RP4-647J21.1 | ECM1      | 0.393592366  | 0           |
| RP4-647J21.1 | DUSP5     | 0.543642009  | 0           |
| RP4-647J21.1 | SEZ6L2    | 0.427106778  | 0           |
| RP4-647J21.1 | THRSP     | -0.065547335 | 0.170332647 |
| RP4-647J21.1 | C19orf33  | 0.597790177  | 0           |
| RP4-647J21.1 | MPZL2     | 0.528573799  | 0           |
| RP4-647J21.1 | CTSH      | 0.297705359  | 2.40E-10    |
| RP4-647J21.1 | CYP1B1    | 0.279157601  | 3.12E-09    |
| RP4-647J21.1 | ALOX5     | 0.735926211  | 0           |
| RP4-647J21.1 | SYTL5     | 0.541508017  | 8.18E-35    |
| RP4-647J21.1 | TNFRSF12A | 0.30564143   | 7.57E-11    |
| RP4-647J21.1 | DUSP6     | 0.462211184  | 0           |
| RP4-647J21.1 | ALOX15B   | 0.574702497  | 0           |
| RP4-647J21.1 | SDC4      | 0.410814656  | 0           |
| RP4-647J21.1 | MDK       | 0.567489227  | 0           |
| RP4-647J21.1 | KRT19     | 0.58564282   | 0           |
| RP4-647J21.1 | MET       | 0.496005441  | 0           |
| RP4-647J21.1 | TESC      | 0.140971641  | 0.003099339 |
| RP4-647J21.1 | CXCL17    | 0.397364609  | 4.67E-18    |
| RP4-647J21.1 | NPC2      | 0.160069869  | 0.000773367 |
| RP4-647J21.1 | COMP      | 0.542081233  | 0           |
| RP4-647J21.1 | TUSC3     | 0.454732112  | 0           |
| RP4-647J21.1 | TMPRSS4   | 0.704885013  | 0           |
| RP4-647J21.1 | LGALS3    | 0.507091998  | 0           |
| RP4-647J21.1 | CRLF1     | 0.430456971  | 0           |
| RP4-647J21.1 | CTXN1     | 0.438440983  | 0           |
| RP4-647J21.1 | PCSK1N    | 0.440054948  | 0           |
| RP4-647J21.1 | NMU       | 0.463091917  | 1.02E-24    |
| RP4-647J21.1 | GALE      | 0.354315395  | 2.61E-14    |
| RP4-647J21.1 | PCSK2     | 0.339505471  | 3.60E-13    |
| RP4-647J21.1 | GJB3      | 0.308530936  | 4.93E-11    |
| RP4-647J21.1 | SLPI      | 0.635299149  | 0           |

|              |          |             |             |
|--------------|----------|-------------|-------------|
| RP4-647J21.1 | AGR2     | 0.356988315 | 1.58E-14    |
| RP4-647J21.1 | MRC2     | 0.470981399 | 0           |
| RP4-647J21.1 | GOLT1A   | 0.253411892 | 8.15E-08    |
| RP4-647J21.1 | SLC27A6  | 0.609740261 | 4.80E-46    |
| RP4-647J21.1 | KCNN4    | 0.634996894 | 0           |
| RP4-647J21.1 | ETV4     | 0.367582569 | 1.72E-15    |
| RP4-647J21.1 | SYT12    | 0.354149445 | 2.70E-14    |
| RP4-647J21.1 | PVRL4    | 0.435141284 | 0           |
| RP4-647J21.1 | PLCD3    | 0.252976452 | 8.59E-08    |
| RP4-647J21.1 | PLAU     | 0.591276449 | 0           |
| RP4-647J21.1 | LRRK2    | 0.240800727 | 3.57E-07    |
| RP4-647J21.1 | SFN      | 0.624648315 | 0           |
| RP4-647J21.1 | LPAR5    | 0.33562197  | 6.91E-13    |
| RP4-647J21.1 | NGEF     | 0.551116967 | 0           |
| RP4-647J21.1 | DTX4     | 0.435912169 | 0           |
| RP4-647J21.1 | CST6     | 0.470911048 | 0           |
| RP4-647J21.1 | QPCT     | 0.306695422 | 6.48E-11    |
| RP4-647J21.1 | TIMP1    | 0.391903653 | 0           |
| RP4-647J21.1 | CAMK2N1  | 0.369320061 | 1.27E-15    |
| RP4-647J21.1 | KLHDC8A  | 0.27830289  | 3.49E-09    |
| RP4-647J21.1 | PDLIM4   | 0.365605063 | 2.85E-15    |
| RP4-647J21.1 | SCEL     | 0.468228199 | 0           |
| RP4-647J21.1 | LCN2     | 0.510135965 | 0           |
| RP4-647J21.1 | PROS1    | 0.357008173 | 1.58E-14    |
| RP4-647J21.1 | GABRB2   | 0.405787806 | 0           |
| RP4-647J21.1 | TMPRSS6  | 0.563993935 | 0           |
| RP4-647J21.1 | KLK7     | 0.277903461 | 3.16E-09    |
| RP4-647J21.1 | PDZK1IP1 | 0.579012643 | 0           |
| RP4-647J21.1 | CDH3     | 0.460779906 | 0           |
| RP4-647J21.1 | LRP4     | 0.293684418 | 4.25E-10    |
| RP4-647J21.1 | IGSF1    | 0.514502279 | 0           |
| RP4-647J21.1 | B3GNT3   | 0.596351949 | 0           |
| RP4-647J21.1 | CLDN1    | 0.523819419 | 0           |
| RP4-647J21.1 | GDF15    | 0.347710607 | 8.67E-14    |
| RP4-647J21.1 | ARHGAP36 | 0.495847133 | 1.28E-28    |
| RP4-647J21.1 | LAMB3    | 0.594695433 | 0           |
| RP4-647J21.1 | KLK10    | 0.354503045 | 2.52E-14    |
| RP4-647J21.1 | DPP4     | 0.529797286 | 0           |
| RP4-647J21.1 | METTL7B  | 0.089280942 | 0.061635141 |
| RP4-647J21.1 | LIPH     | 0.592876656 | 0           |
| RP4-647J21.1 | CLDN16   | 0.428649115 | 0           |
| RP4-647J21.1 | CHI3L1   | 0.36483049  | 3.35E-15    |
| RP4-647J21.1 | SLC22A31 | 0.604291071 | 4.78E-45    |
| RP4-647J21.1 | TACSTD2  | 0.440759169 | 0           |
| RP4-647J21.1 | SFTPB    | 0.662589038 | 0           |
| RP4-647J21.1 | RXRG     | 0.218581941 | 4.00E-06    |
| RP4-647J21.1 | DCSTAMP  | 0.313269678 | 1.88E-11    |
| RP4-647J21.1 | CITED1   | 0.063782881 | 0.182148661 |
| RP4-647J21.1 | SERPINA1 | 0.508105283 | 0           |
| RP4-647J21.1 | PRR15    | 0.328313954 | 2.29E-12    |
| RP4-647J21.1 | SLC34A2  | 0.40012893  | 0           |

|               |           |               |              |
|---------------|-----------|---------------|--------------|
| RP4-647J21. 1 | FN1       | 0. 567608512  | 0            |
| RP4-647J21. 1 | ZCCHC12   | 0. 323152642  | 5. 23E-12    |
| MIR222HG      | TFF3      | -0. 3643742   | 3. 68E-15    |
| MIR222HG      | CCL21     | -0. 234960241 | 6. 40E-07    |
| MIR222HG      | TPO       | -0. 410939614 | 0            |
| MIR222HG      | MT1G      | -0. 350876837 | 4. 91E-14    |
| MIR222HG      | DIO1      | -0. 393132104 | 0            |
| MIR222HG      | DPT       | -0. 23360598  | 7. 45E-07    |
| MIR222HG      | CDH16     | -0. 416431832 | 0            |
| MIR222HG      | CRABP1    | -0. 353790281 | 2. 17E-14    |
| MIR222HG      | SLC26A7   | -0. 326112783 | 3. 26E-12    |
| MIR222HG      | MT1H      | -0. 348742521 | 5. 33E-14    |
| MIR222HG      | SLC26A4   | -0. 311347254 | 3. 23E-11    |
| MIR222HG      | SLC5A8    | -0. 417578694 | 5. 94E-20    |
| MIR222HG      | PKHD1L1   | -0. 382641682 | 9. 34E-17    |
| MIR222HG      | TFCP2L1   | -0. 406291895 | 0            |
| MIR222HG      | WSCD2     | -0. 376457674 | 3. 15E-16    |
| MIR222HG      | IPCEF1    | -0. 42191951  | 0            |
| MIR222HG      | SLC5A5    | -0. 30503297  | 6. 61E-11    |
| MIR222HG      | MT1F      | -0. 364198606 | 3. 81E-15    |
| MIR222HG      | FOSB      | -0. 186143647 | 8. 98E-05    |
| MIR222HG      | SEMA3D    | -0. 40628503  | 7. 06E-19    |
| MIR222HG      | BMP8A     | -0. 313935073 | 2. 18E-11    |
| MIR222HG      | MATN2     | -0. 45930948  | 0            |
| MIR222HG      | PLA2R1    | -0. 42533509  | 0            |
| MIR222HG      | COL23A1   | -0. 312478122 | 2. 73E-11    |
| MIR222HG      | HGD       | -0. 394235739 | 0            |
| MIR222HG      | TCEAL2    | -0. 320013503 | 8. 56E-12    |
| MIR222HG      | CHRD1     | -0. 215134597 | 5. 41E-06    |
| MIR222HG      | TNFRSF11B | -0. 394609905 | 0            |
| MIR222HG      | FAM167A   | -0. 456123251 | 0            |
| MIR222HG      | KIT       | -0. 462304938 | 0            |
| MIR222HG      | SLC4A4    | -0. 481489545 | 0            |
| MIR222HG      | SMOC2     | -0. 252619732 | 8. 97E-08    |
| MIR222HG      | FHL1      | -0. 410508146 | 0            |
| MIR222HG      | OTOS      | -0. 371999365 | 6. 77E-16    |
| MIR222HG      | IGFBPL1   | -0. 495192926 | 1. 54E-28    |
| MIR222HG      | HBB       | -0. 272083899 | 7. 91E-09    |
| MIR222HG      | BEX1      | -0. 326075622 | 3. 28E-12    |
| MIR222HG      | FABP4     | -0. 415278471 | 9. 90E-20    |
| MIR222HG      | LMOD1     | -0. 334706269 | 8. 05E-13    |
| MIR222HG      | SOD3      | -0. 312015307 | 2. 92E-11    |
| MIR222HG      | TMEM171   | -0. 337658751 | 4. 92E-13    |
| MIR222HG      | PI16      | -0. 225925416 | 1. 85E-06    |
| MIR222HG      | ZMAT4     | -0. 400646188 | 2. 35E-18    |
| MIR222HG      | MFAP4     | -0. 130019829 | 0. 006403559 |
| MIR222HG      | CWH43     | -0. 390058153 | 2. 10E-17    |
| MIR222HG      | SPX       | -0. 379801541 | 6. 36E-17    |
| MIR222HG      | APOD      | -0. 105350806 | 0. 027340512 |
| MIR222HG      | DPP6      | -0. 392812829 | 0            |
| MIR222HG      | MMRN1     | -0. 280882908 | 2. 48E-09    |



|          |            |              |             |
|----------|------------|--------------|-------------|
| MIR222HG | WDR72      | -0.417095771 | 0           |
| MIR222HG | MPPED2     | -0.364536178 | 3.56E-15    |
| MIR222HG | PAPSS2     | -0.368772995 | 1.43E-15    |
| MIR222HG | DCN        | -0.122592669 | 0.010178669 |
| MIR222HG | SORBS2     | -0.472026881 | 0           |
| MIR222HG | EGR2       | -0.170822116 | 0.00033006  |
| MIR222HG | EDN3       | -0.219411327 | 3.47E-06    |
| MIR222HG | DIO2       | -0.468111041 | 0           |
| MIR222HG | ITPR1      | -0.396461447 | 0           |
| MIR222HG | CFD        | -0.131000916 | 0.006012924 |
| MIR222HG | CPXM1      | -0.262562515 | 2.66E-08    |
| MIR222HG | ELM01      | -0.396740015 | 0           |
| MIR222HG | GPC3       | -0.287758473 | 8.13E-10    |
| MIR222HG | MYOC       | -0.065529621 | 0.170513119 |
| MIR222HG | DEPTOR     | -0.429495173 | 0           |
| MIR222HG | DGKI       | -0.438130927 | 0           |
| MIR222HG | CARTPT     | -0.302062514 | 1.03E-10    |
| MIR222HG | IYD        | -0.356895412 | 1.61E-14    |
| MIR222HG | LYVE1      | -0.175128859 | 0.000231337 |
| MIR222HG | CLCNKB     | -0.371507757 | 7.62E-16    |
| MIR222HG | NCAM1      | -0.436858364 | 0           |
| MIR222HG | HBA2       | -0.177615264 | 0.000187716 |
| MIR222HG | GLT8D2     | -0.316432683 | 1.49E-11    |
| MIR222HG | OGDHL      | -0.426035907 | 0           |
| MIR222HG | LIFR       | -0.397879393 | 0           |
| MIR222HG | CSGALNACT1 | -0.481624858 | 0           |
| MIR222HG | RAP1GAP    | -0.433975383 | 0           |
| MIR222HG | COL9A3     | -0.287919022 | 9.50E-10    |
| MIR222HG | FBLN1      | -0.148406318 | 0.001839492 |
| MIR222HG | EFEMP1     | -0.32202447  | 6.24E-12    |
| MIR222HG | AOX1       | -0.409640684 | 3.42E-19    |
| MIR222HG | GRIN2C     | -0.340450531 | 3.06E-13    |
| MIR222HG | C11orf74   | -0.317686948 | 1.23E-11    |
| MIR222HG | PPARGC1A   | -0.449955889 | 0           |
| MIR222HG | ANGPTL1    | -0.339573978 | 3.56E-13    |
| MIR222HG | SCARA5     | -0.234100791 | 7.05E-07    |
| MIR222HG | LTF        | -0.320375897 | 8.08E-12    |
| MIR222HG | CA4        | -0.286604932 | 9.55E-10    |
| MIR222HG | TG         | -0.383047626 | 4.41E-18    |
| MIR222HG | FCGBP      | -0.43189988  | 0           |
| MIR222HG | PBX4       | -0.169689689 | 0.000361896 |
| MIR222HG | CYR61      | -0.219284176 | 3.72E-06    |
| MIR222HG | FOS        | -0.234880304 | 6.96E-07    |
| MIR222HG | KHDRBS2    | -0.284781585 | 1.46E-09    |
| MIR222HG | MUM1L1     | -0.349112525 | 6.75E-14    |
| MIR222HG | RGS16      | -0.362787185 | 5.09E-15    |
| MIR222HG | MT1M       | -0.35405867  | 2.74E-14    |
| MIR222HG | LRP2       | -0.456819104 | 0           |
| MIR222HG | MAFB       | -0.364655322 | 3.47E-15    |
| MIR222HG | KCNK2      | -0.338502398 | 4.26E-13    |
| MIR222HG | TBC1D4     | -0.296974898 | 2.67E-10    |

|          |          |              |             |
|----------|----------|--------------|-------------|
| MIR222HG | MIOX     | -0.279161866 | 2.66E-09    |
| MIR222HG | TPPP     | -0.384361463 | 0           |
| MIR222HG | FMOD     | -0.495526457 | 0           |
| MIR222HG | CITED2   | -0.356547769 | 1.72E-14    |
| MIR222HG | RGS8     | -0.448368365 | 4.25E-23    |
| MIR222HG | ABI3BP   | -0.259901934 | 3.70E-08    |
| MIR222HG | ADH1B    | -0.187424241 | 7.79E-05    |
| MIR222HG | OGN      | -0.174367419 | 0.000241463 |
| MIR222HG | NR4A1    | -0.132695019 | 0.005388524 |
| MIR222HG | FOXJ1    | -0.291874017 | 4.54E-10    |
| MIR222HG | ALDH1A1  | -0.38297458  | 5.23E-18    |
| MIR222HG | OCA2     | -0.349425537 | 4.72E-14    |
| MIR222HG | TMEM139  | -0.232855579 | 8.71E-07    |
| MIR222HG | ARHGAP24 | -0.373337456 | 4.85E-16    |
| MIR222HG | SLC25A15 | -0.493690517 | 0           |
| MIR222HG | DES      | -0.187446002 | 7.77E-05    |
| MIR222HG | GDF10    | -0.332910371 | 8.03E-13    |
| MIR222HG | KIAA1324 | -0.352969219 | 3.35E-14    |
| MIR222HG | JUN      | -0.215094308 | 5.73E-06    |
| MIR222HG | C7       | -0.038808199 | 0.417154067 |
| MIR222HG | LGI3     | -0.368910861 | 1.39E-15    |
| MIR222HG | CDON     | -0.42983459  | 0           |
| MIR222HG | BCL2     | -0.501704882 | 0           |
| MIR222HG | HLF      | -0.335195466 | 7.42E-13    |
| MIR222HG | EGR1     | -0.219141205 | 3.78E-06    |
| MIR222HG | IP6K3    | -0.432936851 | 0           |
| MIR222HG | SCUBE3   | -0.388454883 | 0           |
| MIR222HG | PKNOX2   | -0.302185143 | 1.26E-10    |
| MIR222HG | SMAD9    | -0.40311602  | 0           |
| MIR222HG | IQGAP2   | -0.433898649 | 0           |
| MIR222HG | GNA14    | -0.390079627 | 0           |
| MIR222HG | LAYN     | -0.295493125 | 3.29E-10    |
| MIR222HG | AVPR1A   | -0.398084915 | 0           |
| MIR222HG | PDLIM3   | -0.306650601 | 6.52E-11    |
| MIR222HG | GPM6A    | -0.37966864  | 6.73E-17    |
| MIR222HG | SDPR     | -0.228382745 | 1.42E-06    |
| MIR222HG | CRYAB    | -0.277265352 | 4.01E-09    |
| MIR222HG | FOXA2    | -0.248826508 | 1.28E-07    |
| MIR222HG | C8orf88  | -0.384826973 | 0           |
| MIR222HG | ISM1     | -0.264029252 | 2.21E-08    |
| MIR222HG | BMP2     | -0.245182076 | 2.16E-07    |
| MIR222HG | ID4      | -0.316770113 | 1.41E-11    |
| MIR222HG | NUPR1    | -0.281582449 | 2.25E-09    |
| MIR222HG | SERTM1   | -0.509396727 | 2.32E-30    |
| MIR222HG | IRS1     | -0.434814633 | 0           |
| MIR222HG | FIBIN    | -0.287076368 | 1.07E-09    |
| MIR222HG | PODN     | -0.146175362 | 0.002156586 |
| MIR222HG | TDRD9    | -0.341068941 | 2.76E-13    |
| MIR222HG | EPHA3    | -0.23435579  | 7.38E-07    |
| MIR222HG | AIF1L    | -0.345117824 | 1.37E-13    |
| MIR222HG | EBF4     | -0.310859193 | 3.48E-11    |

|          |          |              |             |
|----------|----------|--------------|-------------|
| MIR222HG | ADM2     | -0.419651535 | 0           |
| MIR222HG | GSTM3    | -0.393992346 | 0           |
| MIR222HG | HSD17B6  | -0.205225847 | 1.53E-05    |
| MIR222HG | AGR3     | -0.161618223 | 0.00067634  |
| MIR222HG | EPHB1    | -0.37048497  | 9.70E-16    |
| MIR222HG | TMOD1    | -0.186733406 | 8.52E-05    |
| MIR222HG | WASF3    | -0.416919751 | 0           |
| MIR222HG | SELV     | -0.377838123 | 2.40E-16    |
| MIR222HG | ENPP1    | -0.239637805 | 4.08E-07    |
| MIR222HG | SYNE1    | -0.436786681 | 7.07E-22    |
| MIR222HG | PLCH1    | -0.364233498 | 3.79E-15    |
| MIR222HG | CCDC146  | -0.241393181 | 3.34E-07    |
| MIR222HG | SLC16A2  | -0.420028538 | 0           |
| MIR222HG | IER2     | -0.211205984 | 8.48E-06    |
| MIR222HG | KCNAB1   | -0.280939501 | 2.46E-09    |
| MIR222HG | SYNDIG1  | -0.368324364 | 1.58E-15    |
| MIR222HG | C16orf89 | -0.303963497 | 9.70E-11    |
| MIR222HG | CTGF     | -0.126009242 | 0.008247951 |
| MIR222HG | NR4A3    | -0.168244652 | 0.000406683 |
| MIR222HG | KIAA1456 | -0.257470136 | 4.98E-08    |
| MIR222HG | AQP4     | -0.29681292  | 2.73E-10    |
| MIR222HG | RNF150   | -0.455000043 | 0           |
| MIR222HG | C1S      | -0.094472181 | 0.047935473 |
| MIR222HG | PFKFB2   | -0.415130192 | 0           |
| MIR222HG | PROX1    | -0.343882848 | 1.70E-13    |
| MIR222HG | TCF7L1   | -0.347135883 | 9.60E-14    |
| MIR222HG | HSPB6    | -0.183408034 | 0.000114135 |
| MIR222HG | FHDC1    | -0.226587228 | 1.72E-06    |
| MIR222HG | PRR15L   | -0.366939609 | 2.14E-15    |
| MIR222HG | SLC1A1   | -0.35590312  | 1.94E-14    |
| MIR222HG | BTBD11   | -0.417717443 | 0           |
| MIR222HG | TRIM58   | -0.495202643 | 0           |
| MIR222HG | LRIG1    | -0.385711186 | 0           |
| MIR222HG | ROR2     | -0.334968243 | 7.71E-13    |
| MIR222HG | GPR125   | -0.404752395 | 0           |
| MIR222HG | FLRT1    | -0.356495148 | 1.74E-14    |
| MIR222HG | PGF      | -0.322988253 | 5.36E-12    |
| MIR222HG | DUSP1    | -0.208464414 | 1.11E-05    |
| MIR222HG | PLA2G7   | -0.298865587 | 2.03E-10    |
| MIR222HG | PLSCR4   | -0.31986273  | 8.76E-12    |
| MIR222HG | FAM46B   | -0.312803638 | 2.59E-11    |
| MIR222HG | GLDC     | -0.270555888 | 9.63E-09    |
| MIR222HG | ZBTB16   | -0.347713302 | 8.66E-14    |
| MIR222HG | OMD      | -0.128642634 | 0.006956903 |
| MIR222HG | HSD11B2  | -0.238518568 | 4.63E-07    |
| MIR222HG | FGL2     | -0.157985572 | 0.000906814 |
| MIR222HG | CLCNKA   | -0.317034722 | 1.05E-11    |
| MIR222HG | GATM     | -0.374156424 | 3.92E-16    |
| MIR222HG | TNS3     | -0.454270149 | 0           |
| MIR222HG | TOB1     | -0.338832595 | 4.03E-13    |
| MIR222HG | MARC2    | -0.357310569 | 1.49E-14    |

|          |          |              |             |
|----------|----------|--------------|-------------|
| MIR222HG | LRRC2    | -0.375683442 | 2.58E-16    |
| MIR222HG | SORD     | -0.344700823 | 1.47E-13    |
| MIR222HG | RIMS4    | -0.365282667 | 3.05E-15    |
| MIR222HG | SLC29A4  | -0.361544455 | 6.53E-15    |
| MIR222HG | SLC39A14 | -0.496923411 | 0           |
| MIR222HG | FAXDC2   | -0.40951713  | 0           |
| MIR222HG | HSPB8    | -0.294249497 | 3.93E-10    |
| MIR222HG | CCL19    | 0.043372213  | 0.36462656  |
| MIR222HG | KCNIP3   | -0.281167859 | 2.38E-09    |
| MIR222HG | CGNL1    | -0.374485202 | 3.59E-16    |
| MIR222HG | ATF3     | -0.043530383 | 0.362736408 |
| MIR222HG | SGCD     | -0.3393981   | 3.66E-13    |
| MIR222HG | STARD13  | -0.399793343 | 0           |
| MIR222HG | LDHD     | -0.348453408 | 7.59E-14    |
| MIR222HG | RCAN1    | -0.320991186 | 7.34E-12    |
| MIR222HG | ID3      | -0.327475554 | 2.62E-12    |
| MIR222HG | SYTL3    | -0.363123906 | 4.75E-15    |
| MIR222HG | MT1E     | -0.263223192 | 2.45E-08    |
| MIR222HG | CAMK1D   | -0.344449771 | 1.54E-13    |
| MIR222HG | PRKCQ    | -0.461665395 | 0           |
| MIR222HG | NUAK2    | -0.396715761 | 0           |
| MIR222HG | LIPG     | -0.263197803 | 2.45E-08    |
| MIR222HG | SLC25A25 | -0.348799916 | 7.14E-14    |
| MIR222HG | PRKX     | -0.34670328  | 1.04E-13    |
| MIR222HG | SRPX     | -0.122083332 | 0.010498522 |
| MIR222HG | FAM189A1 | -0.349056499 | 6.82E-14    |
| MIR222HG | PLEKHH1  | -0.118738529 | 0.012829526 |
| MIR222HG | WNT11    | -0.310558214 | 3.64E-11    |
| MIR222HG | SNAI1    | -0.310015829 | 3.95E-11    |
| MIR222HG | FDCSP    | 8.65E-05     | 0.998558559 |
| MIR222HG | MT1X     | -0.18097496  | 0.000140921 |
| MIR222HG | ACACB    | -0.408908507 | 0           |
| MIR222HG | ARC      | 0.031865839  | 0.505308004 |
| MIR222HG | KLK4     | -0.311352945 | 2.53E-11    |
| MIR222HG | ZFPM2    | -0.313538354 | 2.32E-11    |
| MIR222HG | AKAP12   | -0.306568336 | 6.60E-11    |
| MIR222HG | GJB6     | -0.389438721 | 2.39E-17    |
| MIR222HG | ERO1LB   | -0.367565961 | 1.87E-15    |
| MIR222HG | DNALI1   | -0.186745462 | 8.51E-05    |
| MIR222HG | HKDC1    | -0.346295781 | 1.11E-13    |
| MIR222HG | ZFP36L2  | -0.328942859 | 2.07E-12    |
| MIR222HG | CAPSL    | -0.305793433 | 5.90E-11    |
| MIR222HG | CYP7B1   | -0.483418246 | 0           |
| MIR222HG | CPQ      | -0.306783219 | 6.40E-11    |
| MIR222HG | RPS6KA6  | -0.388003216 | 3.19E-17    |
| MIR222HG | TLE1     | -0.377203227 | 1.64E-16    |
| MIR222HG | TP53INP2 | -0.373617443 | 4.51E-16    |
| MIR222HG | KATNAL2  | -0.331795913 | 1.30E-12    |
| MIR222HG | SGPP2    | -0.382861961 | 6.52E-18    |
| MIR222HG | CTH      | -0.420027828 | 0           |
| MIR222HG | KIF12    | -0.117462137 | 0.013832888 |

|          |          |              |             |
|----------|----------|--------------|-------------|
| MIR222HG | TMEM220  | -0.332138025 | 1.23E-12    |
| MIR222HG | CENPJ    | -0.236266336 | 5.97E-07    |
| MIR222HG | FAM155B  | -0.143722572 | 0.002562316 |
| MIR222HG | WFS1     | -0.538889188 | 0           |
| MIR222HG | SELENBP1 | -0.268356136 | 1.28E-08    |
| MIR222HG | SNTA1    | -0.383948434 | 0           |
| MIR222HG | FRAS1    | -0.297081559 | 2.63E-10    |
| MIR222HG | FBLN7    | -0.376882817 | 1.81E-16    |
| MIR222HG | AGPAT9   | -0.356233316 | 1.83E-14    |
| MIR222HG | GPR83    | -0.332825225 | 1.10E-12    |
| MIR222HG | PRTG     | -0.345613829 | 1.25E-13    |
| MIR222HG | EGR3     | -0.036411435 | 0.446517972 |
| MIR222HG | GRAMD2   | -0.261273357 | 3.12E-08    |
| MIR222HG | HYOU1    | -0.548713395 | 0           |
| MIR222HG | FBLN5    | -0.162902498 | 0.000621025 |
| MIR222HG | ITM2A    | -0.289568588 | 7.56E-10    |
| MIR222HG | SRF      | -0.23380915  | 7.84E-07    |
| MIR222HG | FGFR2    | -0.283053441 | 1.85E-09    |
| MIR222HG | MT1A     | -0.179762472 | 0.000152727 |
| MIR222HG | MAMDC2   | -0.138684376 | 0.003621684 |
| MIR222HG | FHL2     | -0.302787383 | 1.15E-10    |
| MIR222HG | FTCDNL1  | -0.471268194 | 0           |
| MIR222HG | PKIA     | -0.263686148 | 2.31E-08    |
| MIR222HG | DNAJB4   | -0.234811087 | 7.02E-07    |
| MIR222HG | SLC25A33 | -0.337376921 | 5.15E-13    |
| MIR222HG | EYA2     | -0.357594244 | 1.41E-14    |
| MIR222HG | LPAR1    | -0.391372473 | 0           |
| MIR222HG | STX11    | -0.163323187 | 0.000600937 |
| MIR222HG | ARHGEF28 | -0.351867002 | 4.10E-14    |
| MIR222HG | OR2W3    | -0.444310629 | 0           |
| MIR222HG | ALDH1B1  | -0.518360197 | 1.48E-31    |
| MIR222HG | CXCL12   | -0.164870205 | 0.000532138 |
| MIR222HG | OLFM2    | -0.278193676 | 3.55E-09    |
| MIR222HG | TUB      | -0.332197312 | 1.22E-12    |
| MIR222HG | HTRA3    | -0.176182425 | 0.000211807 |
| MIR222HG | CKB      | -0.248590423 | 1.45E-07    |
| MIR222HG | RGS2     | -0.114389802 | 0.016536195 |
| MIR222HG | SHANK2   | -0.359881367 | 9.06E-15    |
| MIR222HG | CNTFR    | -0.280977784 | 2.08E-09    |
| MIR222HG | CYTH3    | -0.420604964 | 0           |
| MIR222HG | PLAC9    | -0.094948754 | 0.046816972 |
| MIR222HG | WVOX     | -0.400068082 | 0           |
| MIR222HG | NPR3     | -0.28084603  | 2.49E-09    |
| MIR222HG | SDC2     | -0.273813603 | 6.31E-09    |
| MIR222HG | KLF15    | -0.275723724 | 4.91E-09    |
| MIR222HG | TMEM164  | -0.496009129 | 0           |
| MIR222HG | LONRF3   | -0.166099365 | 0.000482774 |
| MIR222HG | GBP1     | -0.04164168  | 0.383947308 |
| MIR222HG | ARHGAP6  | -0.303120559 | 1.10E-10    |
| MIR222HG | TMEM119  | -0.139358953 | 0.003459886 |
| MIR222HG | SH3RF1   | -0.474216421 | 0           |

|          |          |              |             |
|----------|----------|--------------|-------------|
| MIR222HG | CRELD2   | -0.292763328 | 4.84E-10    |
| MIR222HG | PCP4     | -0.068061682 | 0.154497826 |
| MIR222HG | GCSH     | -0.325157936 | 3.80E-12    |
| MIR222HG | IMPA2    | -0.401363764 | 0           |
| MIR222HG | C1R      | -0.07565394  | 0.113426285 |
| MIR222HG | SUCNR1   | -0.244635862 | 2.30E-07    |
| MIR222HG | SFRP1    | -0.313420771 | 2.36E-11    |
| MIR222HG | UGT8     | -0.38063214  | 4.32E-17    |
| MIR222HG | TLE4     | -0.186828011 | 8.45E-05    |
| MIR222HG | ANTXR1   | -0.375680605 | 2.58E-16    |
| MIR222HG | GPX3     | -0.376313341 | 2.15E-16    |
| MIR222HG | DPY19L2  | -0.104788847 | 0.028177851 |
| MIR222HG | FAM46C   | -0.450220699 | 0           |
| MIR222HG | IL33     | -0.089999705 | 0.059544412 |
| MIR222HG | PEG3     | -0.427593563 | 0           |
| MIR222HG | FAHD2A   | -0.225241478 | 1.99E-06    |
| MIR222HG | PTGDS    | -0.023476173 | 0.623617324 |
| MIR222HG | CHCHD10  | -0.287150123 | 1.06E-09    |
| MIR222HG | CD36     | -0.340698605 | 2.94E-13    |
| MIR222HG | ANKRD37  | -0.154567439 | 0.001172495 |
| MIR222HG | TSPAN33  | -0.381143604 | 3.26E-17    |
| MIR222HG | PRDM16   | -0.3903755   | 0           |
| MIR222HG | UST      | -0.277281096 | 4.00E-09    |
| MIR222HG | NEXN     | -0.267125132 | 1.49E-08    |
| MIR222HG | NUPR1L   | -0.055644712 | 0.24464141  |
| MIR222HG | SLC24A3  | -0.481663438 | 0           |
| MIR222HG | MARC1    | -0.291294604 | 5.95E-10    |
| MIR222HG | MYH11    | -0.150021276 | 0.001637267 |
| MIR222HG | APOA1    | -0.286297125 | 9.97E-10    |
| MIR222HG | TMEM178B | -0.338719267 | 4.11E-13    |
| MIR222HG | CAPN6    | -0.16314161  | 0.000600326 |
| MIR222HG | PPM1L    | -0.448181648 | 0           |
| MIR222HG | FZD8     | -0.380385201 | 4.88E-17    |
| MIR222HG | RCAN2    | -0.337567124 | 4.99E-13    |
| MIR222HG | COPZ2    | -0.419075392 | 0           |
| MIR222HG | GAS1     | -0.205994321 | 1.42E-05    |
| MIR222HG | DACT1    | -0.286965309 | 1.08E-09    |
| MIR222HG | WBSCR17  | -0.354286034 | 2.63E-14    |
| MIR222HG | NCS1     | -0.360698633 | 7.72E-15    |
| MIR222HG | SPIRE2   | -0.232085403 | 9.48E-07    |
| MIR222HG | C15orf52 | -0.247465796 | 1.65E-07    |
| MIR222HG | SPAG5    | -0.269414241 | 1.12E-08    |
| MIR222HG | ARL4D    | -0.399833483 | 0           |
| MIR222HG | FAM189A2 | -0.137009137 | 0.004053592 |
| MIR222HG | MAP1LC3A | -0.263577501 | 2.34E-08    |
| MIR222HG | KLF6     | 0.014004998  | 0.76972795  |
| MIR222HG | ADD3     | -0.267782121 | 1.37E-08    |
| MIR222HG | TSPAN7   | -0.300373315 | 1.64E-10    |
| MIR222HG | KLF9     | -0.190923558 | 5.85E-05    |
| MIR222HG | KCNQ1    | -0.394652315 | 0           |
| MIR222HG | MAN1A1   | -0.148844453 | 0.001782479 |

|          |          |              |             |
|----------|----------|--------------|-------------|
| MIR222HG | MLF1     | -0.142316115 | 0.002825252 |
| MIR222HG | RARB     | -0.356790453 | 1.64E-14    |
| MIR222HG | CDC42EP2 | -0.225812372 | 1.87E-06    |
| MIR222HG | FAM3B    | -0.12969644  | 0.006537225 |
| MIR222HG | GADD45B  | -0.045255973 | 0.344010528 |
| MIR222HG | TMEM47   | -0.284431673 | 1.53E-09    |
| MIR222HG | SDF2L1   | -0.25516046  | 6.60E-08    |
| MIR222HG | CCDC85A  | -0.327419103 | 2.65E-12    |
| MIR222HG | CRYBG3   | -0.382775299 | 7.55E-18    |
| MIR222HG | FBLN2    | -0.07759413  | 0.104446817 |
| MIR222HG | PEBP4    | -0.112190476 | 0.018745561 |
| MIR222HG | CDADC1   | -0.299851638 | 1.76E-10    |
| MIR222HG | FAM63A   | -0.468877104 | 0           |
| MIR222HG | GLUL     | -0.229145545 | 1.31E-06    |
| MIR222HG | FREM2    | -0.352398608 | 3.72E-14    |
| MIR222HG | ACKR3    | -0.31625411  | 1.53E-11    |
| MIR222HG | DENND6A  | -0.454787571 | 0           |
| MIR222HG | CLDN8    | -0.229397589 | 1.27E-06    |
| MIR222HG | UTS2R    | -0.14396468  | 0.002498194 |
| MIR222HG | SCNN1B   | -0.223681411 | 2.35E-06    |
| MIR222HG | TTC30A   | -0.485275462 | 0           |
| MIR222HG | CORO2B   | -0.315038849 | 1.85E-11    |
| MIR222HG | TC2N     | -0.340317914 | 3.13E-13    |
| MIR222HG | ALDH2    | -0.366169291 | 2.53E-15    |
| MIR222HG | GPR183   | -0.044256305 | 0.354782532 |
| MIR222HG | C4orf47  | -0.103747904 | 0.029787212 |
| MIR222HG | SLC25A42 | -0.322736492 | 5.58E-12    |
| MIR222HG | LGMN     | -0.44272106  | 0           |
| MIR222HG | ACSF2    | -0.416749547 | 0           |
| MIR222HG | KIAA1467 | -0.531480751 | 0           |
| MIR222HG | PRKG1    | -0.308925101 | 4.65E-11    |
| MIR222HG | GNAI1    | -0.395790274 | 0           |
| MIR222HG | ABCC4    | -0.391966629 | 0           |
| MIR222HG | PRPS1    | -0.574100256 | 0           |
| MIR222HG | TSPAN5   | -0.396801431 | 0           |
| MIR222HG | CR2      | -0.099579467 | 0.037009494 |
| MIR222HG | CCDC170  | -0.427041816 | 0           |
| MIR222HG | RRAD     | 0.037506276  | 0.432961372 |
| MIR222HG | SCGB2A1  | -0.326680983 | 2.98E-12    |
| MIR222HG | SESN3    | -0.270607375 | 9.57E-09    |
| MIR222HG | SGK223   | -0.342382495 | 2.20E-13    |
| MIR222HG | NDRG2    | -0.394154608 | 0           |
| MIR222HG | C3orf52  | -0.178280906 | 0.00017742  |
| MIR222HG | FLRT3    | 0.233418105  | 8.19E-07    |
| MIR222HG | MST1R    | 0.451066615  | 0           |
| MIR222HG | SDC1     | 0.061283286  | 0.199910285 |
| MIR222HG | ST8SIA4  | 0.232780405  | 8.79E-07    |
| MIR222HG | UBTD1    | 0.383201094  | 2.75E-18    |
| MIR222HG | EPHA2    | 0.430289178  | 0           |
| MIR222HG | TMEM130  | 0.347133472  | 9.60E-14    |
| MIR222HG | SPINK2   | 0.310815223  | 3.50E-11    |

|          |          |              |             |
|----------|----------|--------------|-------------|
| MIR222HG | MMP16    | 0.317516177  | 1.26E-11    |
| MIR222HG | SIGLEC15 | 0.438538851  | 0           |
| MIR222HG | RIN1     | 0.470368947  | 0           |
| MIR222HG | IL1RN    | 0.25713455   | 5.19E-08    |
| MIR222HG | FCER1G   | 0.261721562  | 2.95E-08    |
| MIR222HG | CD276    | 0.311270946  | 3.27E-11    |
| MIR222HG | CTSB     | 0.221405209  | 2.98E-06    |
| MIR222HG | FAM171A2 | 0.278560608  | 3.38E-09    |
| MIR222HG | ASPHD1   | 0.339128893  | 3.84E-13    |
| MIR222HG | C15orf48 | 0.226144271  | 1.81E-06    |
| MIR222HG | DYSF     | 0.11465135   | 0.016289269 |
| MIR222HG | PDZRN4   | 0.292326328  | 5.15E-10    |
| MIR222HG | EFHD2    | 0.271184085  | 8.88E-09    |
| MIR222HG | ASF1B    | 0.218344789  | 4.10E-06    |
| MIR222HG | AQP1     | 0.19389377   | 4.46E-05    |
| MIR222HG | ARRDC2   | 0.578253247  | 0           |
| MIR222HG | PRSS1    | 0.39481269   | 7.93E-18    |
| MIR222HG | MAPK13   | 0.30673854   | 6.44E-11    |
| MIR222HG | CST5     | 0.29021265   | 5.75E-10    |
| MIR222HG | AHR      | 0.319929819  | 8.67E-12    |
| MIR222HG | BAX      | 0.38461833   | 0           |
| MIR222HG | C1orf115 | 0.321330744  | 6.96E-12    |
| MIR222HG | PLK3     | 0.545063642  | 0           |
| MIR222HG | JAG2     | 0.358680007  | 1.14E-14    |
| MIR222HG | RAD23B   | 0.31981947   | 8.82E-12    |
| MIR222HG | CA12     | -0.015991002 | 0.738193968 |
| MIR222HG | ADTRP    | 0.395393697  | 0           |
| MIR222HG | UCP2     | 0.381682727  | 2.30E-17    |
| MIR222HG | IGFBP2   | 0.260964436  | 3.24E-08    |
| MIR222HG | LOXL2    | 0.229567368  | 1.25E-06    |
| MIR222HG | GPX1     | 0.350204955  | 5.55E-14    |
| MIR222HG | P3H3     | 0.383781917  | 0           |
| MIR222HG | C2orf81  | 0.407865153  | 0           |
| MIR222HG | CDT1     | 0.253604365  | 7.97E-08    |
| MIR222HG | SNX25    | 0.405241024  | 0           |
| MIR222HG | MTHFD1L  | 0.283167762  | 1.82E-09    |
| MIR222HG | CDC42BPG | 0.346992001  | 7.25E-14    |
| MIR222HG | MSN      | 0.296162455  | 2.99E-10    |
| MIR222HG | SIGLEC6  | 0.300271884  | 1.34E-10    |
| MIR222HG | F2R      | 0.124194294  | 0.009228536 |
| MIR222HG | TMEM184A | 0.513110999  | 0           |
| MIR222HG | CKS2     | 0.221124088  | 3.07E-06    |
| MIR222HG | TAX1BP3  | 0.443882423  | 0           |
| MIR222HG | PMEP1    | 0.344405093  | 1.55E-13    |
| MIR222HG | CXCL16   | 0.296922418  | 2.69E-10    |
| MIR222HG | FAXC     | 0.432245821  | 0           |
| MIR222HG | VTCN1    | 0.335357748  | 5.33E-13    |
| MIR222HG | SH2D4A   | 0.294685505  | 3.69E-10    |
| MIR222HG | RNF24    | 0.218691439  | 3.96E-06    |
| MIR222HG | LY6G6C   | 0.341332028  | 1.93E-13    |
| MIR222HG | NID1     | 0.187907392  | 7.67E-05    |



|          |          |             |             |
|----------|----------|-------------|-------------|
| MIR222HG | STAC     | 0.293762287 | 4.21E-10    |
| MIR222HG | RAB34    | 0.498250864 | 0           |
| MIR222HG | HES4     | 0.495704037 | 0           |
| MIR222HG | EPHA10   | 0.326557159 | 3.04E-12    |
| MIR222HG | ENTPD2   | 0.444455161 | 0           |
| MIR222HG | DDB2     | 0.424494138 | 0           |
| MIR222HG | NKAIN4   | 0.435698562 | 0           |
| MIR222HG | TRIM29   | 0.306593725 | 6.58E-11    |
| MIR222HG | ADCY8    | 0.360940059 | 5.92E-15    |
| MIR222HG | SFTA2    | 0.272257934 | 7.73E-09    |
| MIR222HG | NRIP1    | 0.220792898 | 3.18E-06    |
| MIR222HG | VWA1     | 0.2698311   | 1.06E-08    |
| MIR222HG | APLNR    | 0.103985056 | 0.029413788 |
| MIR222HG | REN      | 0.426929501 | 7.11E-21    |
| MIR222HG | EDIL3    | 0.190500033 | 6.08E-05    |
| MIR222HG | AGRN     | 0.265024382 | 1.95E-08    |
| MIR222HG | TREM1    | 0.32458619  | 4.16E-12    |
| MIR222HG | SRL      | 0.197794716 | 3.11E-05    |
| MIR222HG | RASGRF1  | 0.483181095 | 0           |
| MIR222HG | RMI2     | 0.333379525 | 1.00E-12    |
| MIR222HG | SAMD1    | 0.408096347 | 0           |
| MIR222HG | MGAT4B   | 0.452904683 | 0           |
| MIR222HG | NXN      | 0.406722655 | 0           |
| MIR222HG | SH3BGRL3 | 0.407691828 | 0           |
| MIR222HG | CA11     | 0.365288766 | 3.04E-15    |
| MIR222HG | PLD3     | 0.337375644 | 5.16E-13    |
| MIR222HG | LURAP1L  | 0.268330038 | 1.28E-08    |
| MIR222HG | CARNS1   | 0.362268203 | 5.65E-15    |
| MIR222HG | PDLIM7   | 0.498274977 | 0           |
| MIR222HG | BCL2L1   | 0.315496558 | 1.72E-11    |
| MIR222HG | GGT6     | 0.310047601 | 3.93E-11    |
| MIR222HG | DPYSL3   | 0.269914501 | 1.05E-08    |
| MIR222HG | FYN      | 0.409811016 | 0           |
| MIR222HG | TK1      | 0.192929419 | 4.87E-05    |
| MIR222HG | AK1      | 0.380720504 | 4.12E-17    |
| MIR222HG | HIGD1B   | 0.267163144 | 1.49E-08    |
| MIR222HG | TMEM59L  | 0.259288488 | 3.99E-08    |
| MIR222HG | MEGF9    | 0.173250935 | 0.000270389 |
| MIR222HG | ZFP36L1  | 0.357173271 | 1.53E-14    |
| MIR222HG | ADRA1B   | 0.36862974  | 1.48E-15    |
| MIR222HG | EPHA4    | 0.31003597  | 3.94E-11    |
| MIR222HG | TCERG1L  | 0.324315707 | 4.35E-12    |
| MIR222HG | NGFR     | 0.312405927 | 2.76E-11    |
| MIR222HG | EBI3     | 0.314469231 | 2.01E-11    |
| MIR222HG | S100A10  | 0.321345779 | 6.95E-12    |
| MIR222HG | S100B    | 0.319791244 | 8.86E-12    |
| MIR222HG | CD44     | 0.262663503 | 2.62E-08    |
| MIR222HG | BHLHE41  | 0.346817458 | 1.02E-13    |
| MIR222HG | FBX02    | 0.42353929  | 0           |
| MIR222HG | SLC30A2  | 0.144883509 | 0.002362312 |
| MIR222HG | FRMD5    | 0.330819932 | 1.53E-12    |

|          |          |             |          |
|----------|----------|-------------|----------|
| MIR222HG | SAMD11   | 0.29599764  | 3.06E-10 |
| MIR222HG | SIPA1L2  | 0.369781174 | 1.14E-15 |
| MIR222HG | S100A16  | 0.301670274 | 1.36E-10 |
| MIR222HG | PPL      | 0.280818372 | 2.50E-09 |
| MIR222HG | ARHGDIB  | 0.33224653  | 1.21E-12 |
| MIR222HG | CDC42EP3 | 0.34312558  | 1.94E-13 |
| MIR222HG | RUNX2    | 0.423354902 | 0        |
| MIR222HG | LAMC2    | 0.25157113  | 1.02E-07 |
| MIR222HG | BRINP1   | 0.323468655 | 4.97E-12 |
| MIR222HG | GPRC5B   | 0.283286054 | 1.79E-09 |
| MIR222HG | AQP5     | 0.28343087  | 1.76E-09 |
| MIR222HG | PLAG1    | 0.48888082  | 0        |
| MIR222HG | PTPRU    | 0.24255426  | 2.92E-07 |
| MIR222HG | ANGPTL4  | 0.215983768 | 5.23E-06 |
| MIR222HG | PALM3    | 0.403987325 | 0        |
| MIR222HG | ACP5     | 0.260968124 | 3.24E-08 |
| MIR222HG | DLG4     | 0.435792742 | 0        |
| MIR222HG | ETNK2    | 0.396024731 | 0        |
| MIR222HG | CD109    | 0.36869612  | 1.46E-15 |
| MIR222HG | SNX22    | 0.428044179 | 0        |
| MIR222HG | TMEM98   | 0.320666663 | 7.73E-12 |
| MIR222HG | CTHRC1   | 0.256713151 | 5.47E-08 |
| MIR222HG | S100A2   | 0.382787355 | 7.41E-18 |
| MIR222HG | C11orf80 | 0.487920015 | 0        |
| MIR222HG | SREBF1   | 0.444701816 | 0        |
| MIR222HG | PRSS22   | 0.522099785 | 0        |
| MIR222HG | CMTM3    | 0.378299486 | 1.14E-16 |
| MIR222HG | RDH5     | 0.431472099 | 0        |
| MIR222HG | MYH10    | 0.276561698 | 4.40E-09 |
| MIR222HG | EVPL     | 0.311422995 | 3.20E-11 |
| MIR222HG | SCD      | 0.234526278 | 7.24E-07 |
| MIR222HG | CD151    | 0.464012941 | 0        |
| MIR222HG | S100A4   | 0.452069262 | 0        |
| MIR222HG | BNIP1    | 0.474739516 | 0        |
| MIR222HG | MAP3K6   | 0.451303909 | 0        |
| MIR222HG | MANEAL   | 0.24462111  | 2.30E-07 |
| MIR222HG | CD207    | 0.375082035 | 4.11E-16 |
| MIR222HG | CD1A     | 0.384519239 | 6.43E-17 |
| MIR222HG | C3       | 0.24062414  | 3.65E-07 |
| MIR222HG | NT5E     | 0.345978917 | 1.18E-13 |
| MIR222HG | CACNG4   | 0.304904802 | 6.74E-11 |
| MIR222HG | FHOD1    | 0.529795584 | 0        |
| MIR222HG | LEMD1    | 0.367992607 | 1.70E-15 |
| MIR222HG | ATP11A   | 0.32057376  | 7.84E-12 |
| MIR222HG | PPAP2C   | 0.313061214 | 2.49E-11 |
| MIR222HG | DRAM1    | 0.341065679 | 2.76E-13 |
| MIR222HG | CDA      | 0.277475271 | 3.90E-09 |
| MIR222HG | CCND2    | 0.305615899 | 7.60E-11 |
| MIR222HG | LCN6     | 0.386140044 | 4.65E-17 |
| MIR222HG | CDH4     | 0.216437789 | 4.99E-06 |
| MIR222HG | MMP11    | 0.372305733 | 6.28E-16 |

|          |          |             |             |
|----------|----------|-------------|-------------|
| MIR222HG | B3GAT1   | 0.291342687 | 5.91E-10    |
| MIR222HG | SPP1     | 0.242644894 | 2.89E-07    |
| MIR222HG | HLA-DQB1 | 0.203891018 | 1.74E-05    |
| MIR222HG | SDC3     | 0.347044114 | 9.75E-14    |
| MIR222HG | CX3CL1   | 0.231420329 | 1.02E-06    |
| MIR222HG | SDK1     | 0.30969471  | 4.15E-11    |
| MIR222HG | DOCK9    | 0.284392809 | 1.54E-09    |
| MIR222HG | CSF2     | 0.489582028 | 7.67E-28    |
| MIR222HG | GRHL3    | 0.42028583  | 0           |
| MIR222HG | TMEM92   | 0.409695217 | 3.37E-19    |
| MIR222HG | BASP1    | 0.453817546 | 0           |
| MIR222HG | HRH1     | 0.362660666 | 5.22E-15    |
| MIR222HG | ESM1     | 0.181872789 | 0.000130414 |
| MIR222HG | B4GALNT3 | 0.234908955 | 6.94E-07    |
| MIR222HG | LMO3     | 0.368616549 | 1.48E-15    |
| MIR222HG | C9orf16  | 0.429879552 | 0           |
| MIR222HG | SEMA3F   | 0.32702508  | 2.82E-12    |
| MIR222HG | PLA2G12B | 0.378027525 | 2.32E-16    |
| MIR222HG | KLK6     | 0.344662723 | 1.09E-13    |
| MIR222HG | ST3GAL5  | 0.517300442 | 0           |
| MIR222HG | FAM132B  | 0.221112741 | 3.08E-06    |
| MIR222HG | CDKN1A   | 0.21416343  | 6.29E-06    |
| MIR222HG | E2F1     | 0.260963727 | 3.24E-08    |
| MIR222HG | B3GNT8   | 0.39188876  | 0           |
| MIR222HG | MTMR11   | 0.476717151 | 0           |
| MIR222HG | MYO1G    | 0.362309052 | 5.60E-15    |
| MIR222HG | TMSB10   | 0.462537126 | 0           |
| MIR222HG | UNC5CL   | 0.489329025 | 0           |
| MIR222HG | ABR      | 0.265604212 | 1.81E-08    |
| MIR222HG | PLP2     | 0.410273831 | 0           |
| MIR222HG | SRCIN1   | 0.328570253 | 2.20E-12    |
| MIR222HG | PDE9A    | 0.436636531 | 0           |
| MIR222HG | TREM2    | 0.271572718 | 8.45E-09    |
| MIR222HG | KDELR3   | 0.264753473 | 2.02E-08    |
| MIR222HG | PC       | 0.281503871 | 2.28E-09    |
| MIR222HG | C2CD4A   | 0.333806738 | 9.35E-13    |
| MIR222HG | PELI1    | 0.423558296 | 0           |
| MIR222HG | SSX1     | 0.345704604 | 1.23E-13    |
| MIR222HG | MROH6    | 0.47514205  | 0           |
| MIR222HG | ESPN     | 0.419382469 | 0           |
| MIR222HG | BMP1     | 0.508717736 | 0           |
| MIR222HG | TM4SF4   | 0.414591505 | 1.15E-19    |
| MIR222HG | CORO2A   | 0.352796461 | 3.46E-14    |
| MIR222HG | CD164L2  | 0.396330546 | 5.79E-18    |
| MIR222HG | CTSS     | 0.25912112  | 4.07E-08    |
| MIR222HG | CLU      | 0.430655968 | 0           |
| MIR222HG | TMSB4X   | 0.435140007 | 0           |
| MIR222HG | WNT10A   | 0.419071294 | 4.25E-20    |
| MIR222HG | NAPSA    | 0.389733403 | 0           |
| MIR222HG | PLEKHA4  | 0.403521958 | 0           |
| MIR222HG | SFTPA1   | 0.266613482 | 1.40E-08    |

|          |          |             |          |
|----------|----------|-------------|----------|
| MIR222HG | C1orf116 | 0.403275303 | 0        |
| MIR222HG | TM4SF1   | 0.392452988 | 0        |
| MIR222HG | SEL1L3   | 0.235085684 | 6.81E-07 |
| MIR222HG | VASN     | 0.466957338 | 0        |
| MIR222HG | NPTXR    | 0.237999444 | 4.91E-07 |
| MIR222HG | PDE4C    | 0.48976872  | 0        |
| MIR222HG | CDC42EP1 | 0.420828357 | 0        |
| MIR222HG | ENDOD1   | 0.281550251 | 2.26E-09 |
| MIR222HG | RYR1     | 0.392364624 | 0        |
| MIR222HG | IL1RAP   | 0.352546118 | 3.62E-14 |
| MIR222HG | SLC35F2  | 0.38890913  | 2.66E-17 |
| MIR222HG | ISYNA1   | 0.522936908 | 0        |
| MIR222HG | HLA-G    | 0.258553488 | 4.36E-08 |
| MIR222HG | CDKN2B   | 0.318738671 | 1.04E-11 |
| MIR222HG | ALDH1A3  | 0.312690877 | 2.64E-11 |
| MIR222HG | CLIP3    | 0.35098591  | 4.82E-14 |
| MIR222HG | ULBP2    | 0.293335924 | 4.47E-10 |
| MIR222HG | ETHE1    | 0.345468304 | 1.29E-13 |
| MIR222HG | XPR1     | 0.252186987 | 9.45E-08 |
| MIR222HG | SPTBN2   | 0.29392852  | 4.11E-10 |
| MIR222HG | IVL      | 0.419237857 | 4.09E-20 |
| MIR222HG | MARCO    | 0.271967735 | 8.03E-09 |
| MIR222HG | PLXND1   | 0.282448364 | 2.01E-09 |
| MIR222HG | EMILIN2  | 0.381406429 | 2.78E-17 |
| MIR222HG | PLAUR    | 0.387858032 | 0        |
| MIR222HG | CDC42EP5 | 0.4788935   | 0        |
| MIR222HG | TRPC5    | 0.358620347 | 9.06E-15 |
| MIR222HG | TMEM100  | 0.332253338 | 1.21E-12 |
| MIR222HG | QSOX1    | 0.349377761 | 6.44E-14 |
| MIR222HG | ARHGAP23 | 0.404285751 | 0        |
| MIR222HG | MDFI     | 0.343607542 | 1.78E-13 |
| MIR222HG | FSTL3    | 0.433285912 | 0        |
| MIR222HG | INF2     | 0.427063518 | 0        |
| MIR222HG | TGFBR1   | 0.372228857 | 6.40E-16 |
| MIR222HG | TGFBI    | 0.224275141 | 2.20E-06 |
| MIR222HG | ERBB3    | 0.317919278 | 1.18E-11 |
| MIR222HG | CCL18    | 0.279796577 | 2.86E-09 |
| MIR222HG | CCL17    | 0.374222249 | 4.85E-16 |
| MIR222HG | C16orf45 | 0.317166548 | 1.33E-11 |
| MIR222HG | PRDM1    | 0.318489747 | 1.08E-11 |
| MIR222HG | TRIM47   | 0.435286525 | 0        |
| MIR222HG | CNFN     | 0.325215663 | 3.77E-12 |
| MIR222HG | ARMCX3   | 0.377166491 | 1.66E-16 |
| MIR222HG | RAMP1    | 0.36161873  | 6.43E-15 |
| MIR222HG | GABRD    | 0.266241061 | 1.67E-08 |
| MIR222HG | COL13A1  | 0.414874034 | 0        |
| MIR222HG | S100A5   | 0.362941362 | 4.93E-15 |
| MIR222HG | MISP     | 0.290831222 | 6.34E-10 |
| MIR222HG | HES6     | 0.305660436 | 7.55E-11 |
| MIR222HG | PSD3     | 0.299915323 | 1.75E-10 |
| MIR222HG | DOK7     | 0.392777937 | 0        |

|          |           |             |          |
|----------|-----------|-------------|----------|
| MIR222HG | ZMAT3     | 0.236399237 | 5.88E-07 |
| MIR222HG | MFAP2     | 0.373264694 | 4.94E-16 |
| MIR222HG | TMEM79    | 0.43495108  | 0        |
| MIR222HG | SLC1A5    | 0.356390614 | 1.77E-14 |
| MIR222HG | BBC3      | 0.401991819 | 0        |
| MIR222HG | HLA-DQB2  | 0.279446665 | 3.00E-09 |
| MIR222HG | C1QL1     | 0.397619689 | 0        |
| MIR222HG | TMEM215   | 0.204550648 | 1.56E-05 |
| MIR222HG | PNP       | 0.327338114 | 2.68E-12 |
| MIR222HG | ARNTL     | 0.391889044 | 0        |
| MIR222HG | CLDN2     | 0.308314716 | 4.03E-11 |
| MIR222HG | MVP       | 0.410034693 | 0        |
| MIR222HG | LGALS1    | 0.376349368 | 2.13E-16 |
| MIR222HG | BIRC7     | 0.526303502 | 1.20E-32 |
| MIR222HG | COL8A1    | 0.296771078 | 2.74E-10 |
| MIR222HG | PERP      | 0.344753586 | 1.46E-13 |
| MIR222HG | GJA4      | 0.295527733 | 3.28E-10 |
| MIR222HG | IGFL2     | 0.370003784 | 1.09E-15 |
| MIR222HG | DAPK2     | 0.401782042 | 0        |
| MIR222HG | MAMLD1    | 0.32592882  | 3.36E-12 |
| MIR222HG | ETV5      | 0.276222991 | 4.60E-09 |
| MIR222HG | RUNX1     | 0.354341209 | 2.60E-14 |
| MIR222HG | LONRF2    | 0.315203806 | 1.80E-11 |
| MIR222HG | SPOCK1    | 0.284756622 | 1.47E-09 |
| MIR222HG | XKRX      | 0.378991793 | 8.82E-17 |
| MIR222HG | TGFB1     | 0.290497763 | 6.65E-10 |
| MIR222HG | ERP27     | 0.245634679 | 2.05E-07 |
| MIR222HG | TNFRSF10C | 0.242206759 | 3.04E-07 |
| MIR222HG | PALM      | 0.46594377  | 0        |
| MIR222HG | TSC22D1   | 0.413792952 | 0        |
| MIR222HG | TGM2      | 0.271917666 | 8.08E-09 |
| MIR222HG | UBE2QL1   | 0.366314816 | 2.45E-15 |
| MIR222HG | ECE1      | 0.333433707 | 9.94E-13 |
| MIR222HG | COL8A2    | 0.430393144 | 0        |
| MIR222HG | HIST3H2A  | 0.378655356 | 1.00E-16 |
| MIR222HG | TNFRSF21  | 0.26085125  | 3.29E-08 |
| MIR222HG | SOX4      | 0.301887285 | 1.31E-10 |
| MIR222HG | ELF3      | 0.401263343 | 0        |
| MIR222HG | TPD52L1   | 0.378883004 | 9.19E-17 |
| MIR222HG | INHBB     | 0.382567791 | 1.01E-17 |
| MIR222HG | HPN       | 0.445283915 | 0        |
| MIR222HG | MMP7      | 0.374497151 | 4.60E-16 |
| MIR222HG | RAB27A    | 0.384717616 | 0        |
| MIR222HG | IGF2BP2   | 0.52236885  | 0        |
| MIR222HG | ITGB4     | 0.381655069 | 2.35E-17 |
| MIR222HG | PPP1R1B   | 0.486513133 | 0        |
| MIR222HG | NPDC1     | 0.492124068 | 0        |
| MIR222HG | CCL13     | 0.346911194 | 7.35E-14 |
| MIR222HG | SPINT1    | 0.329473047 | 1.90E-12 |
| MIR222HG | HEY2      | 0.445463056 | 0        |
| MIR222HG | CST2      | 0.266187939 | 1.48E-08 |

|          |            |             |          |
|----------|------------|-------------|----------|
| MIR222HG | ADM        | 0.372190277 | 6.46E-16 |
| MIR222HG | VSTM2L     | 0.303883075 | 9.81E-11 |
| MIR222HG | FAM84A     | 0.319855638 | 8.77E-12 |
| MIR222HG | P4HA2      | 0.277035717 | 4.13E-09 |
| MIR222HG | LPL        | 0.374698525 | 3.39E-16 |
| MIR222HG | TMEM173    | 0.531894348 | 0        |
| MIR222HG | DHRS3      | 0.488484952 | 0        |
| MIR222HG | SCN1B      | 0.465446915 | 0        |
| MIR222HG | GLT1D1     | 0.330436404 | 1.62E-12 |
| MIR222HG | PHYHIP     | 0.383148614 | 3.31E-18 |
| MIR222HG | BHLHE40    | 0.379417163 | 7.47E-17 |
| MIR222HG | BID        | 0.458700715 | 0        |
| MIR222HG | POSTN      | 0.21193446  | 7.88E-06 |
| MIR222HG | ITGA3      | 0.320694605 | 7.69E-12 |
| MIR222HG | RSPO4      | 0.371881072 | 6.97E-16 |
| MIR222HG | ADAMTS9    | 0.41633056  | 0        |
| MIR222HG | ABTB2      | 0.363245461 | 4.64E-15 |
| MIR222HG | KCNQ3      | 0.345067046 | 1.38E-13 |
| MIR222HG | ANXA1      | 0.512215297 | 0        |
| MIR222HG | S100A11    | 0.466549131 | 0        |
| MIR222HG | CEACAM6    | 0.335303696 | 5.38E-13 |
| MIR222HG | IER5L      | 0.501128031 | 0        |
| MIR222HG | KRT80      | 0.311634474 | 3.10E-11 |
| MIR222HG | CDH6       | 0.329063137 | 2.03E-12 |
| MIR222HG | UNC5B      | 0.245378237 | 2.11E-07 |
| MIR222HG | PLEKHN1    | 0.537890797 | 0        |
| MIR222HG | SYTL1      | 0.503118573 | 0        |
| MIR222HG | TMEM163    | 0.336917369 | 5.57E-13 |
| MIR222HG | C4orf48    | 0.389179671 | 0        |
| MIR222HG | B3GNT7     | 0.399916174 | 0        |
| MIR222HG | BAIAP3     | 0.460164616 | 0        |
| MIR222HG | PHLDA2     | 0.433943753 | 0        |
| MIR222HG | GAP43      | 0.317645926 | 9.51E-12 |
| MIR222HG | S100A1     | 0.357713671 | 1.38E-14 |
| MIR222HG | PTPRE      | 0.416888547 | 0        |
| MIR222HG | CCND1      | 0.287107572 | 1.06E-09 |
| MIR222HG | ST6GALNAC5 | 0.350429448 | 3.95E-14 |
| MIR222HG | KRT17      | 0.384062896 | 0        |
| MIR222HG | HPCAL4     | 0.420263136 | 0        |
| MIR222HG | GABBR2     | 0.307582188 | 5.68E-11 |
| MIR222HG | DIRAS3     | 0.377287336 | 1.59E-16 |
| MIR222HG | SERINC2    | 0.337816332 | 4.79E-13 |
| MIR222HG | PTCHD4     | 0.347016172 | 9.80E-14 |
| MIR222HG | EPS8       | 0.307493256 | 5.76E-11 |
| MIR222HG | LY6E       | 0.425137795 | 0        |
| MIR222HG | UPP1       | 0.469397221 | 0        |
| MIR222HG | AHNAK2     | 0.372890385 | 5.43E-16 |
| MIR222HG | PLXNC1     | 0.356637978 | 1.69E-14 |
| MIR222HG | TNC        | 0.285724235 | 1.28E-09 |
| MIR222HG | DUSP4      | 0.362677828 | 5.20E-15 |
| MIR222HG | NRCAM      | 0.285840683 | 1.26E-09 |

|          |         |             |             |
|----------|---------|-------------|-------------|
| MIR222HG | NRP2    | 0.376384543 | 2.10E-16    |
| MIR222HG | CTSC    | 0.425710533 | 0           |
| MIR222HG | AMIGO2  | 0.433147763 | 0           |
| MIR222HG | NAB2    | 0.542252856 | 0           |
| MIR222HG | TBC1D2  | 0.357316527 | 1.49E-14    |
| MIR222HG | PHLDA3  | 0.398455677 | 0           |
| MIR222HG | PTP4A3  | 0.448859771 | 0           |
| MIR222HG | CRABP2  | 0.320960691 | 7.38E-12    |
| MIR222HG | GOS2    | 0.408693907 | 0           |
| MIR222HG | S100A6  | 0.452755186 | 0           |
| MIR222HG | FOXQ1   | 0.370998278 | 8.60E-16    |
| MIR222HG | LRG1    | 0.432484107 | 0           |
| MIR222HG | LAMP5   | 0.338678844 | 4.14E-13    |
| MIR222HG | ALDH3B1 | 0.405762984 | 0           |
| MIR222HG | CDH2    | 0.083191591 | 0.081667092 |
| MIR222HG | SCG5    | 0.315962209 | 1.60E-11    |
| MIR222HG | ZCCHC16 | 0.385136316 | 5.68E-17    |
| MIR222HG | GRB7    | 0.494138439 | 0           |
| MIR222HG | TIAM1   | 0.311679437 | 3.08E-11    |
| MIR222HG | FXYD5   | 0.425199636 | 0           |
| MIR222HG | CLDN9   | 0.395002652 | 0           |
| MIR222HG | FAM43A  | 0.470135767 | 0           |
| MIR222HG | CHST2   | 0.419992511 | 0           |
| MIR222HG | HMGA2   | 0.479703107 | 0           |
| MIR222HG | GALNT7  | 0.403580395 | 0           |
| MIR222HG | CBLN1   | 0.366641041 | 2.28E-15    |
| MIR222HG | STRA6   | 0.426618149 | 0           |
| MIR222HG | MUC21   | 0.44213942  | 1.95E-22    |
| MIR222HG | PRR36   | 0.464772621 | 0           |
| MIR222HG | NFE2L3  | 0.376281002 | 2.17E-16    |
| MIR222HG | NR1D1   | 0.287280188 | 1.04E-09    |
| MIR222HG | MUC1    | 0.319275666 | 9.60E-12    |
| MIR222HG | NAT8L   | 0.362218418 | 5.71E-15    |
| MIR222HG | APOC1   | 0.399773912 | 0           |
| MIR222HG | EVA1A   | 0.416753376 | 0           |
| MIR222HG | ENTPD1  | 0.329776436 | 1.81E-12    |
| MIR222HG | COL1A1  | 0.301316958 | 1.43E-10    |
| MIR222HG | FNDC4   | 0.366369991 | 2.42E-15    |
| MIR222HG | FRMD3   | 0.25177339  | 9.92E-08    |
| MIR222HG | SHROOM4 | 0.382952453 | 5.48E-18    |
| MIR222HG | NELL2   | 0.438743663 | 0           |
| MIR222HG | EPHB3   | 0.40747042  | 0           |
| MIR222HG | TMC6    | 0.50809039  | 0           |
| MIR222HG | NOD1    | 0.50659103  | 0           |
| MIR222HG | GGCT    | 0.495971967 | 0           |
| MIR222HG | ICAM1   | 0.356653012 | 1.69E-14    |
| MIR222HG | PRSS23  | 0.411189106 | 0           |
| MIR222HG | CFI     | 0.43943285  | 0           |
| MIR222HG | CD55    | 0.393549389 | 0           |
| MIR222HG | RASD2   | 0.373181861 | 5.05E-16    |
| MIR222HG | KLK11   | 0.340699    | 2.16E-13    |

|          |           |             |          |
|----------|-----------|-------------|----------|
| MIR222HG | ICAM5     | 0.621104372 | 0        |
| MIR222HG | ADORA1    | 0.28321159  | 1.81E-09 |
| MIR222HG | ITGA2     | 0.294353889 | 3.87E-10 |
| MIR222HG | ABCC3     | 0.354772678 | 2.40E-14 |
| MIR222HG | MFGE8     | 0.448488725 | 0        |
| MIR222HG | STK32A    | 0.276085692 | 4.69E-09 |
| MIR222HG | CYSLTR2   | 0.425306155 | 0        |
| MIR222HG | LAD1      | 0.421435987 | 0        |
| MIR222HG | MGAT3     | 0.302749229 | 1.16E-10 |
| MIR222HG | IGFBP6    | 0.511887228 | 0        |
| MIR222HG | CYP2S1    | 0.319432538 | 9.37E-12 |
| MIR222HG | KCNJ2     | 0.461384416 | 0        |
| MIR222HG | FAM20A    | 0.50330906  | 0        |
| MIR222HG | TGFA      | 0.379299296 | 7.83E-17 |
| MIR222HG | MXRA8     | 0.474308189 | 0        |
| MIR222HG | C8orf4    | 0.356319412 | 1.80E-14 |
| MIR222HG | CLDN10    | 0.440085813 | 3.21E-22 |
| MIR222HG | PDE5A     | 0.38088234  | 3.78E-17 |
| MIR222HG | APOE      | 0.397251338 | 0        |
| MIR222HG | SPOCK2    | 0.331539188 | 1.36E-12 |
| MIR222HG | TENM1     | 0.522438634 | 0        |
| MIR222HG | SLIT1     | 0.311767376 | 3.03E-11 |
| MIR222HG | CXCL14    | 0.336977224 | 5.51E-13 |
| MIR222HG | ECM1      | 0.293348831 | 4.46E-10 |
| MIR222HG | DUSP5     | 0.436822479 | 0        |
| MIR222HG | SEZ6L2    | 0.254616657 | 7.05E-08 |
| MIR222HG | THRSP     | 0.272552388 | 7.44E-09 |
| MIR222HG | C19orf33  | 0.433570154 | 0        |
| MIR222HG | MPZL2     | 0.434978171 | 0        |
| MIR222HG | CTSH      | 0.496793913 | 0        |
| MIR222HG | CYP1B1    | 0.36252507  | 5.36E-15 |
| MIR222HG | ALOX5     | 0.355833903 | 1.97E-14 |
| MIR222HG | SYTL5     | 0.387419769 | 3.59E-17 |
| MIR222HG | TNFRSF12A | 0.549058769 | 0        |
| MIR222HG | DUSP6     | 0.48504909  | 0        |
| MIR222HG | ALOX15B   | 0.368918804 | 1.39E-15 |
| MIR222HG | SDC4      | 0.484864134 | 0        |
| MIR222HG | MDK       | 0.41928134  | 0        |
| MIR222HG | KRT19     | 0.404194124 | 0        |
| MIR222HG | MET       | 0.375084464 | 3.05E-16 |
| MIR222HG | TESC      | 0.470468091 | 0        |
| MIR222HG | CXCL17    | 0.384586147 | 6.34E-17 |
| MIR222HG | NPC2      | 0.451218523 | 0        |
| MIR222HG | COMP      | 0.342117827 | 2.30E-13 |
| MIR222HG | TUSC3     | 0.413767847 | 0        |
| MIR222HG | TMPRSS4   | 0.43037201  | 0        |
| MIR222HG | LGALS3    | 0.547453598 | 0        |
| MIR222HG | CRLF1     | 0.294683093 | 3.69E-10 |
| MIR222HG | CTXN1     | 0.416578066 | 0        |
| MIR222HG | PCSK1N    | 0.333888862 | 9.22E-13 |
| MIR222HG | NMU       | 0.392731612 | 1.22E-17 |



|          |          |             |          |
|----------|----------|-------------|----------|
| MIR222HG | GALE     | 0.609435148 | 0        |
| MIR222HG | PCSK2    | 0.222945276 | 2.54E-06 |
| MIR222HG | GJB3     | 0.416556506 | 0        |
| MIR222HG | SLPI     | 0.395842896 | 0        |
| MIR222HG | AGR2     | 0.30181509  | 1.33E-10 |
| MIR222HG | MRC2     | 0.370804954 | 9.00E-16 |
| MIR222HG | GOLT1A   | 0.419831384 | 0        |
| MIR222HG | SLC27A6  | 0.394757004 | 8.03E-18 |
| MIR222HG | KCNN4    | 0.457853806 | 0        |
| MIR222HG | ETV4     | 0.47262694  | 8.21E-26 |
| MIR222HG | SYT12    | 0.452606966 | 0        |
| MIR222HG | PVRL4    | 0.396178766 | 0        |
| MIR222HG | PLCD3    | 0.425991087 | 0        |
| MIR222HG | PLAU     | 0.408762556 | 0        |
| MIR222HG | LRRK2    | 0.410236953 | 0        |
| MIR222HG | SFN      | 0.409865056 | 0        |
| MIR222HG | LPAR5    | 0.440457056 | 0        |
| MIR222HG | NGEF     | 0.436504622 | 0        |
| MIR222HG | DTX4     | 0.388500838 | 0        |
| MIR222HG | CST6     | 0.476621269 | 0        |
| MIR222HG | QPCT     | 0.447918115 | 0        |
| MIR222HG | TIMP1    | 0.490516486 | 0        |
| MIR222HG | CAMK2N1  | 0.465247775 | 0        |
| MIR222HG | KLHDC8A  | 0.259875978 | 3.71E-08 |
| MIR222HG | PDLIM4   | 0.475716207 | 0        |
| MIR222HG | SCEL     | 0.40207224  | 0        |
| MIR222HG | LCN2     | 0.330172587 | 1.70E-12 |
| MIR222HG | PROS1    | 0.383939498 | 0        |
| MIR222HG | GABRB2   | 0.351801048 | 4.15E-14 |
| MIR222HG | TMPRSS6  | 0.393376206 | 0        |
| MIR222HG | KLK7     | 0.302889115 | 9.11E-11 |
| MIR222HG | PDZK1IP1 | 0.459318274 | 0        |
| MIR222HG | CDH3     | 0.381767262 | 2.17E-17 |
| MIR222HG | LRP4     | 0.392370723 | 0        |
| MIR222HG | IGSF1    | 0.308127268 | 5.24E-11 |
| MIR222HG | B3GNT3   | 0.348830411 | 7.10E-14 |
| MIR222HG | CLDN1    | 0.405849363 | 0        |
| MIR222HG | GDF15    | 0.35772984  | 1.37E-14 |
| MIR222HG | ARHGAP36 | 0.313967613 | 1.69E-11 |
| MIR222HG | LAMB3    | 0.374743346 | 3.35E-16 |
| MIR222HG | KLK10    | 0.359283524 | 1.02E-14 |
| MIR222HG | DPP4     | 0.365543931 | 2.88E-15 |
| MIR222HG | METTL7B  | 0.405247832 | 0        |
| MIR222HG | LIPH     | 0.444556858 | 0        |
| MIR222HG | CLDN16   | 0.45405101  | 0        |
| MIR222HG | CHI3L1   | 0.414708369 | 0        |
| MIR222HG | SLC22A31 | 0.564673039 | 2.46E-38 |
| MIR222HG | TACSTD2  | 0.432919831 | 0        |
| MIR222HG | SFTPB    | 0.361153079 | 7.06E-15 |
| MIR222HG | RXRG     | 0.420906368 | 0        |
| MIR222HG | DCSTAMP  | 0.382603867 | 9.41E-17 |

|               |           |              |            |
|---------------|-----------|--------------|------------|
| MIR222HG      | CITED1    | 0.398099808  | 0          |
| MIR222HG      | SERPINA1  | 0.441178298  | 0          |
| MIR222HG      | PRR15     | 0.484049138  | 0          |
| MIR222HG      | SLC34A2   | 0.330108477  | 1.71E-12   |
| MIR222HG      | FN1       | 0.334130978  | 8.86E-13   |
| MIR222HG      | ZCCHC12   | 0.39067506   | 0          |
| CTD-3035K23.7 | TFF3      | -0.362433028 | 4.49E-15   |
| CTD-3035K23.7 | CCL21     | -0.285951347 | 1.05E-09   |
| CTD-3035K23.7 | TPO       | -0.483507571 | 4.22E-27   |
| CTD-3035K23.7 | MT1G      | -0.444796737 | 1.02E-22   |
| CTD-3035K23.7 | DIO1      | -0.400664168 | 2.34E-18   |
| CTD-3035K23.7 | DPT       | -0.268709868 | 1.07E-08   |
| CTD-3035K23.7 | CDH16     | -0.420152912 | 3.33E-20   |
| CTD-3035K23.7 | CRABP1    | -0.465790281 | 5.03E-25   |
| CTD-3035K23.7 | SLC26A7   | -0.528714842 | 5.54E-33   |
| CTD-3035K23.7 | MT1H      | -0.454773787 | 8.57E-24   |
| CTD-3035K23.7 | SLC26A4   | -0.470671427 | 1.39E-25   |
| CTD-3035K23.7 | SLC5A8    | -0.494585624 | 1.84E-28   |
| CTD-3035K23.7 | PKHD1L1   | -0.438494418 | 4.70E-22   |
| CTD-3035K23.7 | TFCP2L1   | -0.534681801 | 7.93E-34   |
| CTD-3035K23.7 | WSCD2     | -0.460274406 | 2.11E-24   |
| CTD-3035K23.7 | IPCEF1    | -0.462407412 | 1.21E-24   |
| CTD-3035K23.7 | SLC5A5    | -0.303259182 | 8.62E-11   |
| CTD-3035K23.7 | MT1F      | -0.407678737 | 5.23E-19   |
| CTD-3035K23.7 | FOSB      | -0.218587339 | 3.78E-06   |
| CTD-3035K23.7 | SEMA3D    | -0.462485226 | 1.19E-24   |
| CTD-3035K23.7 | BMP8A     | -0.364947096 | 2.82E-15   |
| CTD-3035K23.7 | MATN2     | -0.534876118 | 7.44E-34   |
| CTD-3035K23.7 | PLA2R1    | -0.425133958 | 1.07E-20   |
| CTD-3035K23.7 | COL23A1   | -0.382166725 | 1.03E-16   |
| CTD-3035K23.7 | HGD       | -0.4649168   | 6.32E-25   |
| CTD-3035K23.7 | TCEAL2    | -0.306080031 | 5.65E-11   |
| CTD-3035K23.7 | CHRD1     | -0.253510698 | 7.26E-08   |
| CTD-3035K23.7 | TNFRSF11B | -0.391829257 | 1.47E-17   |
| CTD-3035K23.7 | FAM167A   | -0.449534532 | 3.18E-23   |
| CTD-3035K23.7 | KIT       | -0.451165095 | 2.12E-23   |
| CTD-3035K23.7 | SLC4A4    | -0.599659931 | 3.26E-44   |
| CTD-3035K23.7 | SMOC2     | -0.294459859 | 3.13E-10   |
| CTD-3035K23.7 | FHL1      | -0.420372193 | 3.17E-20   |
| CTD-3035K23.7 | OTOS      | -0.362001559 | 4.87E-15   |
| CTD-3035K23.7 | IGFBPL1   | -0.608946254 | 6.73E-46   |
| CTD-3035K23.7 | HBB       | -0.345186875 | 9.93E-14   |
| CTD-3035K23.7 | BEX1      | -0.289037698 | 6.79E-10   |
| CTD-3035K23.7 | FABP4     | -0.472398932 | 8.73E-26   |
| CTD-3035K23.7 | LMOD1     | -0.409266323 | 3.70E-19   |
| CTD-3035K23.7 | SOD3      | -0.393593005 | 1.02E-17   |
| CTD-3035K23.7 | TMEM171   | -0.432028108 | 2.18E-21   |
| CTD-3035K23.7 | PI16      | -0.247089142 | 1.57E-07   |
| CTD-3035K23.7 | ZMAT4     | -0.440111675 | 3.19E-22   |
| CTD-3035K23.7 | MFAP4     | -0.165997572 | 0.00047874 |
| CTD-3035K23.7 | CWH43     | -0.510715055 | 1.55E-30   |

|               |            |              |             |
|---------------|------------|--------------|-------------|
| CTD-3035K23.7 | SPX        | -0.523185311 | 3.24E-32    |
| CTD-3035K23.7 | APOD       | -0.107550062 | 0.024225164 |
| CTD-3035K23.7 | DPP6       | -0.405315442 | 8.69E-19    |
| CTD-3035K23.7 | MMRN1      | -0.391937905 | 1.43E-17    |
| CTD-3035K23.7 | WDR72      | -0.511370396 | 1.27E-30    |
| CTD-3035K23.7 | MPPED2     | -0.467061098 | 3.60E-25    |
| CTD-3035K23.7 | PAPSS2     | -0.48399918  | 3.68E-27    |
| CTD-3035K23.7 | DCN        | -0.188324767 | 7.18E-05    |
| CTD-3035K23.7 | SORBS2     | -0.47187123  | 1.01E-25    |
| CTD-3035K23.7 | EGR2       | -0.1987979   | 2.72E-05    |
| CTD-3035K23.7 | EDN3       | -0.304594518 | 7.06E-11    |
| CTD-3035K23.7 | DIO2       | -0.585844967 | 8.30E-42    |
| CTD-3035K23.7 | ITPR1      | -0.454016594 | 1.04E-23    |
| CTD-3035K23.7 | CFD        | -0.094547259 | 0.047728942 |
| CTD-3035K23.7 | CPXM1      | -0.247414375 | 1.51E-07    |
| CTD-3035K23.7 | ELMO1      | -0.470011458 | 1.65E-25    |
| CTD-3035K23.7 | GPC3       | -0.372374567 | 6.92E-16    |
| CTD-3035K23.7 | MYOC       | -0.167395312 | 0.000427973 |
| CTD-3035K23.7 | DEPTOR     | -0.474606422 | 4.82E-26    |
| CTD-3035K23.7 | DGKI       | -0.43377909  | 1.44E-21    |
| CTD-3035K23.7 | CARTPT     | -0.33906438  | 2.85E-13    |
| CTD-3035K23.7 | IYD        | -0.620744771 | 4.04E-48    |
| CTD-3035K23.7 | LYVE1      | -0.301012038 | 1.20E-10    |
| CTD-3035K23.7 | CLCNKB     | -0.384128904 | 6.95E-17    |
| CTD-3035K23.7 | NCAM1      | -0.565303789 | 1.95E-38    |
| CTD-3035K23.7 | HBA2       | -0.213276521 | 6.55E-06    |
| CTD-3035K23.7 | GLT8D2     | -0.368342967 | 1.49E-15    |
| CTD-3035K23.7 | OGDHL      | -0.546506927 | 1.50E-35    |
| CTD-3035K23.7 | LIFR       | -0.545231667 | 2.32E-35    |
| CTD-3035K23.7 | CSGALNACT1 | -0.420532469 | 3.06E-20    |
| CTD-3035K23.7 | RAP1GAP    | -0.50840642  | 3.12E-30    |
| CTD-3035K23.7 | COL9A3     | -0.362007658 | 4.86E-15    |
| CTD-3035K23.7 | FBLN1      | -0.185623615 | 9.15E-05    |
| CTD-3035K23.7 | EFEMP1     | -0.304585065 | 7.07E-11    |
| CTD-3035K23.7 | AOX1       | -0.440909982 | 2.63E-22    |
| CTD-3035K23.7 | GRIN2C     | -0.383517585 | 7.85E-17    |
| CTD-3035K23.7 | C11orf74   | -0.374757423 | 4.37E-16    |
| CTD-3035K23.7 | PPARGC1A   | -0.604714165 | 4.01E-45    |
| CTD-3035K23.7 | ANGPTL1    | -0.404082733 | 1.13E-18    |
| CTD-3035K23.7 | SCARA5     | -0.240651203 | 3.34E-07    |
| CTD-3035K23.7 | LTF        | -0.392060169 | 1.40E-17    |
| CTD-3035K23.7 | CA4        | -0.329298507 | 1.46E-12    |
| CTD-3035K23.7 | TG         | -0.456176069 | 6.00E-24    |
| CTD-3035K23.7 | FCGBP      | -0.395878148 | 6.36E-18    |
| CTD-3035K23.7 | PBX4       | -0.209107919 | 9.97E-06    |
| CTD-3035K23.7 | CYR61      | -0.233619694 | 7.44E-07    |
| CTD-3035K23.7 | FOS        | -0.245003139 | 2.01E-07    |
| CTD-3035K23.7 | KHDRBS2    | -0.429959267 | 3.53E-21    |
| CTD-3035K23.7 | MUM1L1     | -0.369371289 | 1.23E-15    |
| CTD-3035K23.7 | RGS16      | -0.436215715 | 8.10E-22    |
| CTD-3035K23.7 | MT1M       | -0.417501971 | 6.04E-20    |

|               |          |              |             |
|---------------|----------|--------------|-------------|
| CTD-3035K23.7 | LRP2     | -0.46328879  | 9.66E-25    |
| CTD-3035K23.7 | MAFB     | -0.428737338 | 4.68E-21    |
| CTD-3035K23.7 | KCNK2    | -0.42935121  | 4.06E-21    |
| CTD-3035K23.7 | TBC1D4   | -0.437806422 | 5.54E-22    |
| CTD-3035K23.7 | MIOX     | -0.352728028 | 2.63E-14    |
| CTD-3035K23.7 | TPPP     | -0.520868539 | 6.74E-32    |
| CTD-3035K23.7 | FMOD     | -0.49282246  | 3.05E-28    |
| CTD-3035K23.7 | CITED2   | -0.451862935 | 1.78E-23    |
| CTD-3035K23.7 | RGS8     | -0.452901328 | 1.37E-23    |
| CTD-3035K23.7 | ABI3BP   | -0.424411013 | 1.27E-20    |
| CTD-3035K23.7 | ADH1B    | -0.250286512 | 1.07E-07    |
| CTD-3035K23.7 | OGN      | -0.222618393 | 2.47E-06    |
| CTD-3035K23.7 | NR4A1    | -0.160696541 | 0.000726563 |
| CTD-3035K23.7 | FOXJ1    | -0.333042105 | 7.86E-13    |
| CTD-3035K23.7 | ALDH1A1  | -0.371687635 | 7.89E-16    |
| CTD-3035K23.7 | OCA2     | -0.275385746 | 4.43E-09    |
| CTD-3035K23.7 | TMEM139  | -0.244270407 | 2.19E-07    |
| CTD-3035K23.7 | ARHGAP24 | -0.517719322 | 1.80E-31    |
| CTD-3035K23.7 | SLC25A15 | -0.584833382 | 1.23E-41    |
| CTD-3035K23.7 | DES      | -0.23387742  | 7.23E-07    |
| CTD-3035K23.7 | GDF10    | -0.325616472 | 2.66E-12    |
| CTD-3035K23.7 | KIAA1324 | -0.354886001 | 1.78E-14    |
| CTD-3035K23.7 | JUN      | -0.263735322 | 2.03E-08    |
| CTD-3035K23.7 | C7       | -0.08332636  | 0.081170023 |
| CTD-3035K23.7 | LGI3     | -0.511138492 | 1.37E-30    |
| CTD-3035K23.7 | CDON     | -0.486130429 | 2.03E-27    |
| CTD-3035K23.7 | BCL2     | -0.539503705 | 1.60E-34    |
| CTD-3035K23.7 | HLF      | -0.458800912 | 3.07E-24    |
| CTD-3035K23.7 | EGR1     | -0.242914299 | 2.57E-07    |
| CTD-3035K23.7 | IP6K3    | -0.548494211 | 7.57E-36    |
| CTD-3035K23.7 | SCUBE3   | -0.427403641 | 6.38E-21    |
| CTD-3035K23.7 | PKNOX2   | -0.289081384 | 6.75E-10    |
| CTD-3035K23.7 | SMAD9    | -0.405811022 | 7.81E-19    |
| CTD-3035K23.7 | IQGAP2   | -0.599983745 | 2.85E-44    |
| CTD-3035K23.7 | GNA14    | -0.481220585 | 7.94E-27    |
| CTD-3035K23.7 | LAYN     | -0.319380409 | 7.23E-12    |
| CTD-3035K23.7 | AVPR1A   | -0.509424671 | 2.30E-30    |
| CTD-3035K23.7 | PDLIM3   | -0.425387847 | 1.01E-20    |
| CTD-3035K23.7 | GPM6A    | -0.517123322 | 2.17E-31    |
| CTD-3035K23.7 | SDPR     | -0.382604577 | 9.41E-17    |
| CTD-3035K23.7 | CRYAB    | -0.348458213 | 5.60E-14    |
| CTD-3035K23.7 | FOXA2    | -0.200906853 | 2.23E-05    |
| CTD-3035K23.7 | C8orf88  | -0.45043832  | 2.54E-23    |
| CTD-3035K23.7 | ISM1     | -0.276876133 | 3.63E-09    |
| CTD-3035K23.7 | BMP2     | -0.277223493 | 3.46E-09    |
| CTD-3035K23.7 | ID4      | -0.301840652 | 1.06E-10    |
| CTD-3035K23.7 | NUPR1    | -0.366893956 | 1.96E-15    |
| CTD-3035K23.7 | SERTM1   | -0.548461946 | 7.66E-36    |
| CTD-3035K23.7 | IRS1     | -0.426362696 | 8.11E-21    |
| CTD-3035K23.7 | FIBIN    | -0.345484592 | 9.43E-14    |
| CTD-3035K23.7 | PODN     | -0.175938247 | 0.000211605 |

|               |          |              |             |
|---------------|----------|--------------|-------------|
| CTD-3035K23.7 | TDRD9    | -0.424304209 | 1.30E-20    |
| CTD-3035K23.7 | EPHA3    | -0.35903744  | 8.39E-15    |
| CTD-3035K23.7 | AIF1L    | -0.445651449 | 8.30E-23    |
| CTD-3035K23.7 | EBF4     | -0.354046891 | 2.07E-14    |
| CTD-3035K23.7 | ADM2     | -0.467011455 | 3.65E-25    |
| CTD-3035K23.7 | GSTM3    | -0.451911444 | 1.76E-23    |
| CTD-3035K23.7 | HSD17B6  | -0.310551172 | 2.86E-11    |
| CTD-3035K23.7 | AGR3     | -0.245659796 | 1.86E-07    |
| CTD-3035K23.7 | EPHB1    | -0.528691723 | 5.58E-33    |
| CTD-3035K23.7 | TMOD1    | -0.285650763 | 1.09E-09    |
| CTD-3035K23.7 | WASF3    | -0.514370967 | 5.08E-31    |
| CTD-3035K23.7 | SELV     | -0.375019149 | 4.16E-16    |
| CTD-3035K23.7 | ENPP1    | -0.438939561 | 4.23E-22    |
| CTD-3035K23.7 | SYNE1    | -0.456198566 | 5.97E-24    |
| CTD-3035K23.7 | PLCH1    | -0.322785641 | 4.20E-12    |
| CTD-3035K23.7 | CCDC146  | -0.328152627 | 1.76E-12    |
| CTD-3035K23.7 | SLC16A2  | -0.377289079 | 2.68E-16    |
| CTD-3035K23.7 | IER2     | -0.202963664 | 1.83E-05    |
| CTD-3035K23.7 | KCNAB1   | -0.246637957 | 1.66E-07    |
| CTD-3035K23.7 | SYNDIG1  | -0.365293747 | 2.64E-15    |
| CTD-3035K23.7 | C16orf89 | -0.419087146 | 4.23E-20    |
| CTD-3035K23.7 | CTGF     | -0.169199694 | 0.000369832 |
| CTD-3035K23.7 | NR4A3    | -0.17337794  | 0.000262247 |
| CTD-3035K23.7 | KIAA1456 | -0.427233578 | 6.63E-21    |
| CTD-3035K23.7 | AQP4     | -0.373665558 | 5.40E-16    |
| CTD-3035K23.7 | RNF150   | -0.471388841 | 1.14E-25    |
| CTD-3035K23.7 | C1S      | -0.112738617 | 0.018130638 |
| CTD-3035K23.7 | PFKFB2   | -0.629211614 | 8.96E-50    |
| CTD-3035K23.7 | PROX1    | -0.444264705 | 1.17E-22    |
| CTD-3035K23.7 | TCF7L1   | -0.350053459 | 4.23E-14    |
| CTD-3035K23.7 | HSPB6    | -0.226242588 | 1.68E-06    |
| CTD-3035K23.7 | FHDC1    | -0.490218892 | 6.40E-28    |
| CTD-3035K23.7 | PRR15L   | -0.475260293 | 4.04E-26    |
| CTD-3035K23.7 | SLC1A1   | -0.457416437 | 4.38E-24    |
| CTD-3035K23.7 | BTBD11   | -0.390349326 | 1.98E-17    |
| CTD-3035K23.7 | TRIM58   | -0.594653495 | 2.50E-43    |
| CTD-3035K23.7 | LRIG1    | -0.504047331 | 1.15E-29    |
| CTD-3035K23.7 | ROR2     | -0.27861506  | 2.87E-09    |
| CTD-3035K23.7 | GPR125   | -0.433265781 | 1.63E-21    |
| CTD-3035K23.7 | FLRT1    | -0.355538737 | 1.58E-14    |
| CTD-3035K23.7 | PGF      | -0.308397512 | 3.98E-11    |
| CTD-3035K23.7 | DUSP1    | -0.237504053 | 4.80E-07    |
| CTD-3035K23.7 | PLA2G7   | -0.343648365 | 1.30E-13    |
| CTD-3035K23.7 | PLSCR4   | -0.442716975 | 1.70E-22    |
| CTD-3035K23.7 | FAM46B   | -0.427048338 | 6.92E-21    |
| CTD-3035K23.7 | GLDC     | -0.375855528 | 3.54E-16    |
| CTD-3035K23.7 | ZBTB16   | -0.41191457  | 2.08E-19    |
| CTD-3035K23.7 | OMD      | -0.178702073 | 0.000167291 |
| CTD-3035K23.7 | HSD11B2  | -0.298940361 | 1.63E-10    |
| CTD-3035K23.7 | FGL2     | -0.190348787 | 5.98E-05    |
| CTD-3035K23.7 | CLCNKA   | -0.316747067 | 1.10E-11    |

|               |          |              |             |
|---------------|----------|--------------|-------------|
| CTD-3035K23.7 | GATM     | -0.529779474 | 3.93E-33    |
| CTD-3035K23.7 | TNS3     | -0.492119939 | 3.73E-28    |
| CTD-3035K23.7 | TOB1     | -0.340146683 | 2.37E-13    |
| CTD-3035K23.7 | MARC2    | -0.476619663 | 2.80E-26    |
| CTD-3035K23.7 | LRRC2    | -0.526799895 | 1.03E-32    |
| CTD-3035K23.7 | SORD     | -0.391830959 | 1.47E-17    |
| CTD-3035K23.7 | RIMS4    | -0.332396119 | 8.75E-13    |
| CTD-3035K23.7 | SLC29A4  | -0.3572944   | 1.15E-14    |
| CTD-3035K23.7 | SLC39A14 | -0.6443607   | 7.28E-53    |
| CTD-3035K23.7 | FAXDC2   | -0.480041774 | 1.10E-26    |
| CTD-3035K23.7 | HSPB8    | -0.351964576 | 3.01E-14    |
| CTD-3035K23.7 | CCL19    | 0.015269523  | 0.749697338 |
| CTD-3035K23.7 | KCNIP3   | -0.335264639 | 5.42E-13    |
| CTD-3035K23.7 | CGNL1    | -0.45288615  | 1.38E-23    |
| CTD-3035K23.7 | ATF3     | -0.046099287 | 0.335223511 |
| CTD-3035K23.7 | SGCD     | -0.362454729 | 4.48E-15    |
| CTD-3035K23.7 | STARD13  | -0.472957421 | 7.52E-26    |
| CTD-3035K23.7 | LDHD     | -0.460461545 | 2.01E-24    |
| CTD-3035K23.7 | RCAN1    | -0.297272495 | 2.08E-10    |
| CTD-3035K23.7 | ID3      | -0.272554205 | 6.45E-09    |
| CTD-3035K23.7 | SYTL3    | -0.558233903 | 2.50E-37    |
| CTD-3035K23.7 | MT1E     | -0.323962892 | 3.48E-12    |
| CTD-3035K23.7 | CAMK1D   | -0.485808599 | 2.22E-27    |
| CTD-3035K23.7 | PRKCQ    | -0.543546213 | 4.11E-35    |
| CTD-3035K23.7 | NUAK2    | -0.420297586 | 3.23E-20    |
| CTD-3035K23.7 | LIPG     | -0.369653687 | 1.16E-15    |
| CTD-3035K23.7 | SLC25A25 | -0.440904151 | 2.63E-22    |
| CTD-3035K23.7 | PRKX     | -0.339783011 | 2.52E-13    |
| CTD-3035K23.7 | SRPX     | -0.131041316 | 0.00596574  |
| CTD-3035K23.7 | FAM189A1 | -0.335323076 | 5.36E-13    |
| CTD-3035K23.7 | PLEKHH1  | -0.295672569 | 2.63E-10    |
| CTD-3035K23.7 | WNT11    | -0.305819476 | 5.88E-11    |
| CTD-3035K23.7 | SNAI1    | -0.271982459 | 6.96E-09    |
| CTD-3035K23.7 | FDCSP    | -0.053213013 | 0.265903465 |
| CTD-3035K23.7 | MT1X     | -0.281083598 | 2.05E-09    |
| CTD-3035K23.7 | ACACB    | -0.481699853 | 6.96E-27    |
| CTD-3035K23.7 | ARC      | -0.013841629 | 0.772427311 |
| CTD-3035K23.7 | KLK4     | -0.398054202 | 4.04E-18    |
| CTD-3035K23.7 | ZFPM2    | -0.218575992 | 3.79E-06    |
| CTD-3035K23.7 | AKAP12   | -0.348774936 | 5.30E-14    |
| CTD-3035K23.7 | GJB6     | -0.351370327 | 3.35E-14    |
| CTD-3035K23.7 | ERO1LB   | -0.463812595 | 8.43E-25    |
| CTD-3035K23.7 | DNALI1   | -0.188262075 | 7.22E-05    |
| CTD-3035K23.7 | HKDC1    | -0.341993548 | 1.73E-13    |
| CTD-3035K23.7 | ZFP36L2  | -0.410426411 | 2.88E-19    |
| CTD-3035K23.7 | CAPSL    | -0.286771776 | 9.33E-10    |
| CTD-3035K23.7 | CYP7B1   | -0.525332304 | 1.64E-32    |
| CTD-3035K23.7 | CPQ      | -0.318429247 | 8.41E-12    |
| CTD-3035K23.7 | RPS6KA6  | -0.456076444 | 6.16E-24    |
| CTD-3035K23.7 | TLE1     | -0.48272165  | 5.25E-27    |
| CTD-3035K23.7 | TP53INP2 | -0.436091182 | 8.34E-22    |

|               |          |              |             |
|---------------|----------|--------------|-------------|
| CTD-3035K23.7 | KATNAL2  | -0.386896294 | 3.99E-17    |
| CTD-3035K23.7 | SGPP2    | -0.415851834 | 8.72E-20    |
| CTD-3035K23.7 | CTH      | -0.504942608 | 8.82E-30    |
| CTD-3035K23.7 | KIF12    | -0.086785207 | 0.069278938 |
| CTD-3035K23.7 | TMEM220  | -0.455453975 | 7.21E-24    |
| CTD-3035K23.7 | CENPJ    | -0.325517855 | 2.71E-12    |
| CTD-3035K23.7 | FAM155B  | -0.220647102 | 3.05E-06    |
| CTD-3035K23.7 | WFS1     | -0.411182547 | 2.44E-19    |
| CTD-3035K23.7 | SELENBP1 | -0.296723726 | 2.26E-10    |
| CTD-3035K23.7 | SNTA1    | -0.479246492 | 1.37E-26    |
| CTD-3035K23.7 | FRAS1    | -0.333011977 | 7.90E-13    |
| CTD-3035K23.7 | FBLN7    | -0.523292682 | 3.14E-32    |
| CTD-3035K23.7 | AGPAT9   | -0.456297056 | 5.82E-24    |
| CTD-3035K23.7 | GPR83    | -0.340232494 | 2.33E-13    |
| CTD-3035K23.7 | PRTG     | -0.496476333 | 1.06E-28    |
| CTD-3035K23.7 | EGR3     | -0.048856606 | 0.307088158 |
| CTD-3035K23.7 | GRAMD2   | -0.23888328  | 4.10E-07    |
| CTD-3035K23.7 | HYOU1    | -0.517551245 | 1.90E-31    |
| CTD-3035K23.7 | FBLN5    | -0.213187731 | 6.61E-06    |
| CTD-3035K23.7 | ITM2A    | -0.368050073 | 1.57E-15    |
| CTD-3035K23.7 | SRF      | -0.260665252 | 2.99E-08    |
| CTD-3035K23.7 | FGFR2    | -0.404886668 | 9.52E-19    |
| CTD-3035K23.7 | MT1A     | -0.228553766 | 1.30E-06    |
| CTD-3035K23.7 | MAMDC2   | -0.191384625 | 5.44E-05    |
| CTD-3035K23.7 | FHL2     | -0.293022195 | 3.85E-10    |
| CTD-3035K23.7 | FTCDNL1  | -0.589655287 | 1.85E-42    |
| CTD-3035K23.7 | PKIA     | -0.248251357 | 1.37E-07    |
| CTD-3035K23.7 | DNAJB4   | -0.377616581 | 2.51E-16    |
| CTD-3035K23.7 | SLC25A33 | -0.425625141 | 9.60E-21    |
| CTD-3035K23.7 | EYA2     | -0.414432609 | 1.19E-19    |
| CTD-3035K23.7 | LPAR1    | -0.38413401  | 6.94E-17    |
| CTD-3035K23.7 | STX11    | -0.451166939 | 2.12E-23    |
| CTD-3035K23.7 | ARHGEF28 | -0.565065218 | 2.13E-38    |
| CTD-3035K23.7 | OR2W3    | -0.479783488 | 1.18E-26    |
| CTD-3035K23.7 | ALDH1B1  | -0.668775978 | 3.13E-58    |
| CTD-3035K23.7 | CXCL12   | -0.214166692 | 5.98E-06    |
| CTD-3035K23.7 | OLFM2    | -0.144676572 | 0.002376248 |
| CTD-3035K23.7 | TUB      | -0.421076274 | 2.71E-20    |
| CTD-3035K23.7 | HTRA3    | -0.156329651 | 0.001014916 |
| CTD-3035K23.7 | CKB      | -0.346127683 | 8.43E-14    |
| CTD-3035K23.7 | RGS2     | -0.14839484  | 0.001823111 |
| CTD-3035K23.7 | SHANK2   | -0.455743039 | 6.70E-24    |
| CTD-3035K23.7 | CNTFR    | -0.342518722 | 1.58E-13    |
| CTD-3035K23.7 | CYTH3    | -0.497339414 | 8.28E-29    |
| CTD-3035K23.7 | PLAC9    | -0.092409202 | 0.053013715 |
| CTD-3035K23.7 | WWOX     | -0.421413847 | 2.51E-20    |
| CTD-3035K23.7 | NPR3     | -0.254022438 | 6.82E-08    |
| CTD-3035K23.7 | SDC2     | -0.260669507 | 2.99E-08    |
| CTD-3035K23.7 | KLF15    | -0.375469446 | 3.81E-16    |
| CTD-3035K23.7 | TMEM164  | -0.482243091 | 5.99E-27    |
| CTD-3035K23.7 | LONRF3   | -0.219408861 | 3.47E-06    |

|               |          |              |             |
|---------------|----------|--------------|-------------|
| CTD-3035K23.7 | GBP1     | -0.170162344 | 0.00034191  |
| CTD-3035K23.7 | ARHGAP6  | -0.474093255 | 5.54E-26    |
| CTD-3035K23.7 | TMEM119  | -0.156255895 | 0.001020588 |
| CTD-3035K23.7 | SH3RF1   | -0.576671065 | 2.85E-40    |
| CTD-3035K23.7 | CRELD2   | -0.225846862 | 1.75E-06    |
| CTD-3035K23.7 | PCP4     | -0.026749827 | 0.576180024 |
| CTD-3035K23.7 | GCSH     | -0.378176697 | 2.25E-16    |
| CTD-3035K23.7 | IMPA2    | -0.442994551 | 1.59E-22    |
| CTD-3035K23.7 | C1R      | -0.046136874 | 0.334829188 |
| CTD-3035K23.7 | SUCNR1   | -0.298570307 | 1.72E-10    |
| CTD-3035K23.7 | SFRP1    | -0.368987618 | 1.32E-15    |
| CTD-3035K23.7 | UGT8     | -0.599819498 | 3.05E-44    |
| CTD-3035K23.7 | TLE4     | -0.217678303 | 4.16E-06    |
| CTD-3035K23.7 | ANTXR1   | -0.381674975 | 1.13E-16    |
| CTD-3035K23.7 | GPX3     | -0.282178441 | 1.76E-09    |
| CTD-3035K23.7 | DPY19L2  | -0.251728218 | 9.01E-08    |
| CTD-3035K23.7 | FAM46C   | -0.47038137  | 1.50E-25    |
| CTD-3035K23.7 | IL33     | -0.213386169 | 6.48E-06    |
| CTD-3035K23.7 | PEG3     | -0.499016216 | 5.08E-29    |
| CTD-3035K23.7 | FAHD2A   | -0.334176179 | 6.50E-13    |
| CTD-3035K23.7 | PTGDS    | -0.050349019 | 0.292529361 |
| CTD-3035K23.7 | CHCHD10  | -0.31114079  | 2.62E-11    |
| CTD-3035K23.7 | CD36     | -0.475178595 | 4.13E-26    |
| CTD-3035K23.7 | ANKRD37  | -0.111771427 | 0.019153032 |
| CTD-3035K23.7 | TSPAN33  | -0.400170006 | 2.59E-18    |
| CTD-3035K23.7 | PRDM16   | -0.35979471  | 7.31E-15    |
| CTD-3035K23.7 | UST      | -0.415982183 | 8.47E-20    |
| CTD-3035K23.7 | NEXN     | -0.419379898 | 3.97E-20    |
| CTD-3035K23.7 | NUPR1L   | -0.069331074 | 0.146988482 |
| CTD-3035K23.7 | SLC24A3  | -0.583739674 | 1.89E-41    |
| CTD-3035K23.7 | MARC1    | -0.347880509 | 6.20E-14    |
| CTD-3035K23.7 | MYH11    | -0.218787755 | 3.71E-06    |
| CTD-3035K23.7 | APOA1    | -0.180786682 | 0.000139796 |
| CTD-3035K23.7 | TMEM178B | -0.347509746 | 6.62E-14    |
| CTD-3035K23.7 | CAPN6    | -0.143160716 | 0.002642752 |
| CTD-3035K23.7 | PPM1L    | -0.527524117 | 8.13E-33    |
| CTD-3035K23.7 | FZD8     | -0.382051412 | 1.05E-16    |
| CTD-3035K23.7 | RCAN2    | -0.39747084  | 4.57E-18    |
| CTD-3035K23.7 | COPZ2    | -0.413871642 | 1.35E-19    |
| CTD-3035K23.7 | GAS1     | -0.302008162 | 1.04E-10    |
| CTD-3035K23.7 | DACT1    | -0.311956071 | 2.31E-11    |
| CTD-3035K23.7 | WBSCR17  | -0.313669325 | 1.77E-11    |
| CTD-3035K23.7 | NCS1     | -0.37032628  | 1.02E-15    |
| CTD-3035K23.7 | SPIRE2   | -0.316772302 | 1.09E-11    |
| CTD-3035K23.7 | C15orf52 | -0.36404345  | 3.33E-15    |
| CTD-3035K23.7 | SPAG5    | -0.338783767 | 2.99E-13    |
| CTD-3035K23.7 | ARL4D    | -0.3873723   | 3.63E-17    |
| CTD-3035K23.7 | FAM189A2 | -0.154056848 | 0.00120372  |
| CTD-3035K23.7 | MAP1LC3A | -0.24642208  | 1.70E-07    |
| CTD-3035K23.7 | KLF6     | -0.089401398 | 0.061265307 |
| CTD-3035K23.7 | ADD3     | -0.370250113 | 1.04E-15    |



|               |          |              |             |
|---------------|----------|--------------|-------------|
| CTD-3035K23.7 | TSPAN7   | -0.325767489 | 2.60E-12    |
| CTD-3035K23.7 | KLF9     | -0.321317908 | 5.32E-12    |
| CTD-3035K23.7 | KCNQ1    | -0.473834118 | 5.94E-26    |
| CTD-3035K23.7 | MAN1A1   | -0.240471575 | 3.41E-07    |
| CTD-3035K23.7 | MLF1     | -0.276348214 | 3.89E-09    |
| CTD-3035K23.7 | RARB     | -0.458785168 | 3.09E-24    |
| CTD-3035K23.7 | CDC42EP2 | -0.279070216 | 2.70E-09    |
| CTD-3035K23.7 | FAM3B    | -0.245825796 | 1.83E-07    |
| CTD-3035K23.7 | GADD45B  | -0.094492652 | 0.047858211 |
| CTD-3035K23.7 | TMEM47   | -0.377275462 | 2.68E-16    |
| CTD-3035K23.7 | SDF2L1   | -0.156569356 | 0.000996685 |
| CTD-3035K23.7 | CCDC85A  | -0.391068725 | 1.71E-17    |
| CTD-3035K23.7 | CRYBG3   | -0.452915227 | 1.37E-23    |
| CTD-3035K23.7 | FBLN2    | -0.137803415 | 0.003817229 |
| CTD-3035K23.7 | PEBP4    | -0.223925957 | 2.15E-06    |
| CTD-3035K23.7 | CDADC1   | -0.409197816 | 3.76E-19    |
| CTD-3035K23.7 | FAM63A   | -0.55542765  | 6.75E-37    |
| CTD-3035K23.7 | GLUL     | -0.461462066 | 1.55E-24    |
| CTD-3035K23.7 | FREM2    | -0.580104523 | 7.68E-41    |
| CTD-3035K23.7 | ACKR3    | -0.315627816 | 1.31E-11    |
| CTD-3035K23.7 | DENND6A  | -0.522736963 | 3.74E-32    |
| CTD-3035K23.7 | CLDN8    | -0.413940008 | 1.33E-19    |
| CTD-3035K23.7 | UTS2R    | -0.151564871 | 0.001447532 |
| CTD-3035K23.7 | SCNN1B   | -0.268016826 | 1.17E-08    |
| CTD-3035K23.7 | TTC30A   | -0.569623022 | 3.99E-39    |
| CTD-3035K23.7 | CORO2B   | -0.303163996 | 8.75E-11    |
| CTD-3035K23.7 | TC2N     | -0.460699122 | 1.89E-24    |
| CTD-3035K23.7 | ALDH2    | -0.435409937 | 9.80E-22    |
| CTD-3035K23.7 | GPR183   | -0.116665953 | 0.014452668 |
| CTD-3035K23.7 | C4orf47  | -0.06722526  | 0.159694201 |
| CTD-3035K23.7 | SLC25A42 | -0.405519404 | 8.32E-19    |
| CTD-3035K23.7 | LGMN     | -0.524521136 | 2.12E-32    |
| CTD-3035K23.7 | ACSF2    | -0.446017106 | 7.59E-23    |
| CTD-3035K23.7 | KIAA1467 | -0.642202928 | 2.05E-52    |
| CTD-3035K23.7 | PRKG1    | -0.411791455 | 2.14E-19    |
| CTD-3035K23.7 | GNAI1    | -0.471527416 | 1.10E-25    |
| CTD-3035K23.7 | ABCC4    | -0.363701054 | 3.55E-15    |
| CTD-3035K23.7 | PRPS1    | -0.593213278 | 4.47E-43    |
| CTD-3035K23.7 | TSPAN5   | -0.362198571 | 4.69E-15    |
| CTD-3035K23.7 | CR2      | -0.199501158 | 2.55E-05    |
| CTD-3035K23.7 | CCDC170  | -0.428678901 | 4.75E-21    |
| CTD-3035K23.7 | RRAD     | 0.001326605  | 0.977888477 |
| CTD-3035K23.7 | SCGB2A1  | -0.343523973 | 1.33E-13    |
| CTD-3035K23.7 | SESN3    | -0.256705435 | 4.90E-08    |
| CTD-3035K23.7 | SGK223   | -0.256478637 | 5.04E-08    |
| CTD-3035K23.7 | NDRG2    | -0.496439455 | 1.07E-28    |
| CTD-3035K23.7 | C3orf52  | -0.319064111 | 7.60E-12    |
| CTD-3035K23.7 | FLRT3    | 0.277482488  | 3.34E-09    |
| CTD-3035K23.7 | MST1R    | 0.637964684  | 1.54E-51    |
| CTD-3035K23.7 | SDC1     | 0.052903937  | 0.26869409  |
| CTD-3035K23.7 | ST8SIA4  | 0.31134461   | 2.54E-11    |

|               |          |             |             |
|---------------|----------|-------------|-------------|
| CTD-3035K23.7 | UBTD1    | 0.552211912 | 2.09E-36    |
| CTD-3035K23.7 | EPAH2    | 0.371601966 | 8.02E-16    |
| CTD-3035K23.7 | TMEM130  | 0.524192924 | 2.36E-32    |
| CTD-3035K23.7 | SPINK2   | 0.358167835 | 9.84E-15    |
| CTD-3035K23.7 | MMP16    | 0.371212055 | 8.64E-16    |
| CTD-3035K23.7 | SIGLEC15 | 0.554069273 | 1.09E-36    |
| CTD-3035K23.7 | RIN1     | 0.666029344 | 1.33E-57    |
| CTD-3035K23.7 | IL1RN    | 0.203723062 | 1.70E-05    |
| CTD-3035K23.7 | FCER1G   | 0.26891948  | 1.04E-08    |
| CTD-3035K23.7 | CD276    | 0.540690175 | 1.08E-34    |
| CTD-3035K23.7 | CTSB     | 0.245372625 | 1.93E-07    |
| CTD-3035K23.7 | FAM171A2 | 0.357127883 | 1.19E-14    |
| CTD-3035K23.7 | ASPHD1   | 0.453485839 | 1.19E-23    |
| CTD-3035K23.7 | C15orf48 | 0.220206555 | 3.19E-06    |
| CTD-3035K23.7 | DYSF     | 0.251724956 | 9.02E-08    |
| CTD-3035K23.7 | PDZRN4   | 0.42632596  | 8.18E-21    |
| CTD-3035K23.7 | EFHD2    | 0.534278131 | 9.06E-34    |
| CTD-3035K23.7 | ASF1B    | 0.216614097 | 4.65E-06    |
| CTD-3035K23.7 | AQP1     | 0.239953018 | 3.62E-07    |
| CTD-3035K23.7 | ARRDC2   | 0.673000369 | 3.27E-59    |
| CTD-3035K23.7 | PRSS1    | 0.564670178 | 2.46E-38    |
| CTD-3035K23.7 | MAPK13   | 0.326334839 | 2.37E-12    |
| CTD-3035K23.7 | CST5     | 0.491333463 | 4.66E-28    |
| CTD-3035K23.7 | AHR      | 0.280428735 | 2.24E-09    |
| CTD-3035K23.7 | BAX      | 0.518660697 | 1.34E-31    |
| CTD-3035K23.7 | C1orf115 | 0.30219865  | 1.01E-10    |
| CTD-3035K23.7 | PLK3     | 0.532230283 | 1.77E-33    |
| CTD-3035K23.7 | JAG2     | 0.419907108 | 3.52E-20    |
| CTD-3035K23.7 | RAD23B   | 0.327887533 | 1.84E-12    |
| CTD-3035K23.7 | CA12     | 0.100647545 | 0.035018576 |
| CTD-3035K23.7 | ADTRP    | 0.359236296 | 8.09E-15    |
| CTD-3035K23.7 | UCP2     | 0.405828468 | 7.78E-19    |
| CTD-3035K23.7 | IGFBP2   | 0.401234496 | 2.07E-18    |
| CTD-3035K23.7 | LOXL2    | 0.278146571 | 3.06E-09    |
| CTD-3035K23.7 | GPX1     | 0.489552965 | 7.74E-28    |
| CTD-3035K23.7 | P3H3     | 0.580538829 | 6.50E-41    |
| CTD-3035K23.7 | C2orf81  | 0.589306651 | 2.12E-42    |
| CTD-3035K23.7 | CDT1     | 0.289213293 | 6.62E-10    |
| CTD-3035K23.7 | SNX25    | 0.375617666 | 3.70E-16    |
| CTD-3035K23.7 | MTHFD1L  | 0.378091453 | 2.29E-16    |
| CTD-3035K23.7 | CDC42BPG | 0.398645126 | 3.57E-18    |
| CTD-3035K23.7 | MSN      | 0.23399457  | 7.13E-07    |
| CTD-3035K23.7 | SIGLEC6  | 0.329126071 | 1.50E-12    |
| CTD-3035K23.7 | F2R      | 0.148059111 | 0.001867719 |
| CTD-3035K23.7 | TMEM184A | 0.488661801 | 9.95E-28    |
| CTD-3035K23.7 | CKS2     | 0.266341017 | 1.45E-08    |
| CTD-3035K23.7 | TAX1BP3  | 0.593703043 | 3.67E-43    |
| CTD-3035K23.7 | PMEP1    | 0.47662335  | 2.79E-26    |
| CTD-3035K23.7 | CXCL16   | 0.375559655 | 3.75E-16    |
| CTD-3035K23.7 | FAXC     | 0.533763971 | 1.07E-33    |
| CTD-3035K23.7 | VTCN1    | 0.283801314 | 1.41E-09    |

|               |          |             |             |
|---------------|----------|-------------|-------------|
| CTD-3035K23.7 | SH2D4A   | 0.279254037 | 2.63E-09    |
| CTD-3035K23.7 | RNF24    | 0.380372908 | 1.46E-16    |
| CTD-3035K23.7 | LY6G6C   | 0.398349168 | 3.80E-18    |
| CTD-3035K23.7 | NID1     | 0.203225922 | 1.78E-05    |
| CTD-3035K23.7 | STAC     | 0.434522319 | 1.21E-21    |
| CTD-3035K23.7 | RAB34    | 0.701515363 | 2.77E-66    |
| CTD-3035K23.7 | HES4     | 0.503751174 | 1.26E-29    |
| CTD-3035K23.7 | EPHA10   | 0.496393642 | 1.09E-28    |
| CTD-3035K23.7 | ENTPD2   | 0.579922404 | 8.23E-41    |
| CTD-3035K23.7 | DDB2     | 0.487168111 | 1.52E-27    |
| CTD-3035K23.7 | NKAIN4   | 0.529260491 | 4.65E-33    |
| CTD-3035K23.7 | TRIM29   | 0.366729851 | 2.02E-15    |
| CTD-3035K23.7 | ADCY8    | 0.550879789 | 3.32E-36    |
| CTD-3035K23.7 | SFTA2    | 0.273601533 | 5.62E-09    |
| CTD-3035K23.7 | NRIP1    | 0.298928589 | 1.64E-10    |
| CTD-3035K23.7 | VWA1     | 0.417721961 | 5.75E-20    |
| CTD-3035K23.7 | APLNR    | 0.165944809 | 0.000480762 |
| CTD-3035K23.7 | REN      | 0.494388695 | 1.94E-28    |
| CTD-3035K23.7 | EDIL3    | 0.197759508 | 3.01E-05    |
| CTD-3035K23.7 | AGRN     | 0.441418454 | 2.33E-22    |
| CTD-3035K23.7 | TREM1    | 0.431800175 | 2.29E-21    |
| CTD-3035K23.7 | SRL      | 0.316722092 | 1.10E-11    |
| CTD-3035K23.7 | RASGRF1  | 0.56790764  | 7.52E-39    |
| CTD-3035K23.7 | RMI2     | 0.386058318 | 4.72E-17    |
| CTD-3035K23.7 | SAMD1    | 0.562612708 | 5.19E-38    |
| CTD-3035K23.7 | MGAT4B   | 0.499553921 | 4.34E-29    |
| CTD-3035K23.7 | NXN      | 0.495838207 | 1.28E-28    |
| CTD-3035K23.7 | SH3BGRL3 | 0.495792819 | 1.30E-28    |
| CTD-3035K23.7 | CA11     | 0.538678921 | 2.11E-34    |
| CTD-3035K23.7 | PLD3     | 0.482083382 | 6.26E-27    |
| CTD-3035K23.7 | LURAP1L  | 0.226993617 | 1.54E-06    |
| CTD-3035K23.7 | CARNS1   | 0.456671507 | 5.29E-24    |
| CTD-3035K23.7 | PDLIM7   | 0.707012697 | 9.58E-68    |
| CTD-3035K23.7 | BCL2L1   | 0.455392985 | 7.32E-24    |
| CTD-3035K23.7 | GGT6     | 0.202628219 | 1.89E-05    |
| CTD-3035K23.7 | DPYSL3   | 0.44788241  | 4.79E-23    |
| CTD-3035K23.7 | FYN      | 0.403948981 | 1.16E-18    |
| CTD-3035K23.7 | TK1      | 0.23030467  | 1.08E-06    |
| CTD-3035K23.7 | AK1      | 0.393586765 | 1.02E-17    |
| CTD-3035K23.7 | HIGD1B   | 0.290083607 | 5.86E-10    |
| CTD-3035K23.7 | TMEM59L  | 0.548255499 | 8.22E-36    |
| CTD-3035K23.7 | MEGF9    | 0.233254888 | 7.75E-07    |
| CTD-3035K23.7 | ZFP36L1  | 0.389150658 | 2.53E-17    |
| CTD-3035K23.7 | ADRA1B   | 0.352698159 | 2.64E-14    |
| CTD-3035K23.7 | EPHA4    | 0.403752678 | 1.21E-18    |
| CTD-3035K23.7 | TCERG1L  | 0.387610303 | 3.46E-17    |
| CTD-3035K23.7 | NGFR     | 0.453651079 | 1.14E-23    |
| CTD-3035K23.7 | EBI3     | 0.355419452 | 1.62E-14    |
| CTD-3035K23.7 | S100A10  | 0.449913947 | 2.90E-23    |
| CTD-3035K23.7 | S100B    | 0.392043999 | 1.40E-17    |
| CTD-3035K23.7 | CD44     | 0.300409371 | 1.32E-10    |

|               |          |             |             |
|---------------|----------|-------------|-------------|
| CTD-3035K23.7 | BHLHE41  | 0.382165165 | 1.03E-16    |
| CTD-3035K23.7 | FBX02    | 0.585306552 | 1.02E-41    |
| CTD-3035K23.7 | SLC30A2  | 0.134372652 | 0.004799476 |
| CTD-3035K23.7 | FRMD5    | 0.323590427 | 3.69E-12    |
| CTD-3035K23.7 | SAMD11   | 0.387959082 | 3.22E-17    |
| CTD-3035K23.7 | SIPA1L2  | 0.466695866 | 3.97E-25    |
| CTD-3035K23.7 | S100A16  | 0.535610552 | 5.84E-34    |
| CTD-3035K23.7 | PPL      | 0.309252225 | 3.49E-11    |
| CTD-3035K23.7 | ARHGDIB  | 0.357313548 | 1.15E-14    |
| CTD-3035K23.7 | CDC42EP3 | 0.377595022 | 2.52E-16    |
| CTD-3035K23.7 | RUNX2    | 0.558747354 | 2.08E-37    |
| CTD-3035K23.7 | LAMC2    | 0.273846202 | 5.44E-09    |
| CTD-3035K23.7 | BRINP1   | 0.436352872 | 7.84E-22    |
| CTD-3035K23.7 | GPRC5B   | 0.292146916 | 4.37E-10    |
| CTD-3035K23.7 | AQP5     | 0.428349696 | 5.13E-21    |
| CTD-3035K23.7 | PLAG1    | 0.456408682 | 5.66E-24    |
| CTD-3035K23.7 | PTPRU    | 0.425165872 | 1.07E-20    |
| CTD-3035K23.7 | ANGPTL4  | 0.419981998 | 3.46E-20    |
| CTD-3035K23.7 | PALM3    | 0.434493951 | 1.22E-21    |
| CTD-3035K23.7 | ACP5     | 0.338329178 | 3.23E-13    |
| CTD-3035K23.7 | DLG4     | 0.482687609 | 5.30E-27    |
| CTD-3035K23.7 | ETNK2    | 0.494722088 | 1.77E-28    |
| CTD-3035K23.7 | CD109    | 0.416219902 | 8.04E-20    |
| CTD-3035K23.7 | SNX22    | 0.545763841 | 1.93E-35    |
| CTD-3035K23.7 | TMEM98   | 0.547075837 | 1.23E-35    |
| CTD-3035K23.7 | CTHRC1   | 0.383740128 | 7.51E-17    |
| CTD-3035K23.7 | S100A2   | 0.383230506 | 8.31E-17    |
| CTD-3035K23.7 | C11orf80 | 0.527554471 | 8.05E-33    |
| CTD-3035K23.7 | SREBF1   | 0.545056498 | 2.46E-35    |
| CTD-3035K23.7 | PRSS22   | 0.521811899 | 5.01E-32    |
| CTD-3035K23.7 | CMTM3    | 0.549008656 | 6.34E-36    |
| CTD-3035K23.7 | RDH5     | 0.513781065 | 6.09E-31    |
| CTD-3035K23.7 | MYH10    | 0.390638958 | 1.87E-17    |
| CTD-3035K23.7 | EVPL     | 0.419025163 | 4.29E-20    |
| CTD-3035K23.7 | SCD      | 0.219540628 | 3.42E-06    |
| CTD-3035K23.7 | CD151    | 0.605026916 | 3.51E-45    |
| CTD-3035K23.7 | S100A4   | 0.389937997 | 2.16E-17    |
| CTD-3035K23.7 | BNIP1    | 0.446133697 | 7.37E-23    |
| CTD-3035K23.7 | MAP3K6   | 0.563947965 | 3.20E-38    |
| CTD-3035K23.7 | MANEAL   | 0.268546022 | 1.09E-08    |
| CTD-3035K23.7 | CD207    | 0.431468156 | 2.48E-21    |
| CTD-3035K23.7 | CD1A     | 0.42884349  | 4.57E-21    |
| CTD-3035K23.7 | C3       | 0.367302023 | 1.81E-15    |
| CTD-3035K23.7 | NT5E     | 0.44368842  | 1.34E-22    |
| CTD-3035K23.7 | CACNG4   | 0.461045107 | 1.73E-24    |
| CTD-3035K23.7 | FHOD1    | 0.591548249 | 8.70E-43    |
| CTD-3035K23.7 | LEMD1    | 0.527449511 | 8.33E-33    |
| CTD-3035K23.7 | ATP11A   | 0.384353433 | 6.65E-17    |
| CTD-3035K23.7 | PPAP2C   | 0.464500649 | 7.05E-25    |
| CTD-3035K23.7 | DRAM1    | 0.464960486 | 6.25E-25    |
| CTD-3035K23.7 | CDA      | 0.342243465 | 1.65E-13    |

|               |          |             |             |
|---------------|----------|-------------|-------------|
| CTD-3035K23.7 | CCND2    | 0.418623621 | 4.70E-20    |
| CTD-3035K23.7 | LCN6     | 0.493736761 | 2.34E-28    |
| CTD-3035K23.7 | CDH4     | 0.41343067  | 1.49E-19    |
| CTD-3035K23.7 | MMP11    | 0.449739204 | 3.03E-23    |
| CTD-3035K23.7 | B3GAT1   | 0.452165758 | 1.65E-23    |
| CTD-3035K23.7 | SPP1     | 0.138710607 | 0.003589921 |
| CTD-3035K23.7 | HLA-DQB1 | 0.229550236 | 1.17E-06    |
| CTD-3035K23.7 | SDC3     | 0.585820429 | 8.38E-42    |
| CTD-3035K23.7 | CX3CL1   | 0.363843743 | 3.46E-15    |
| CTD-3035K23.7 | SDK1     | 0.499171386 | 4.85E-29    |
| CTD-3035K23.7 | DOCK9    | 0.295370172 | 2.75E-10    |
| CTD-3035K23.7 | CSF2     | 0.575464596 | 4.49E-40    |
| CTD-3035K23.7 | GRHL3    | 0.429208096 | 4.20E-21    |
| CTD-3035K23.7 | TMEM92   | 0.57299817  | 1.14E-39    |
| CTD-3035K23.7 | BASP1    | 0.486946845 | 1.61E-27    |
| CTD-3035K23.7 | HRH1     | 0.508091257 | 3.43E-30    |
| CTD-3035K23.7 | ESM1     | 0.18920501  | 6.63E-05    |
| CTD-3035K23.7 | B4GALNT3 | 0.489664308 | 7.50E-28    |
| CTD-3035K23.7 | LMO3     | 0.334388935 | 6.27E-13    |
| CTD-3035K23.7 | C9orf16  | 0.567524821 | 8.66E-39    |
| CTD-3035K23.7 | SEMA3F   | 0.490461434 | 5.98E-28    |
| CTD-3035K23.7 | PLA2G12B | 0.291419588 | 4.84E-10    |
| CTD-3035K23.7 | KLK6     | 0.495110898 | 1.58E-28    |
| CTD-3035K23.7 | ST3GAL5  | 0.547251432 | 1.16E-35    |
| CTD-3035K23.7 | FAM132B  | 0.271829132 | 7.10E-09    |
| CTD-3035K23.7 | CDKN1A   | 0.228646732 | 1.29E-06    |
| CTD-3035K23.7 | E2F1     | 0.267953567 | 1.18E-08    |
| CTD-3035K23.7 | B3GNT8   | 0.487783544 | 1.28E-27    |
| CTD-3035K23.7 | MTMR11   | 0.594523714 | 2.64E-43    |
| CTD-3035K23.7 | MYO1G    | 0.380170931 | 1.52E-16    |
| CTD-3035K23.7 | TMSB10   | 0.598592604 | 5.04E-44    |
| CTD-3035K23.7 | UNC5CL   | 0.591007707 | 1.08E-42    |
| CTD-3035K23.7 | ABR      | 0.397519349 | 4.52E-18    |
| CTD-3035K23.7 | PLP2     | 0.504278951 | 1.08E-29    |
| CTD-3035K23.7 | SRCIN1   | 0.38453924  | 6.40E-17    |
| CTD-3035K23.7 | PDE9A    | 0.506116313 | 6.22E-30    |
| CTD-3035K23.7 | TREM2    | 0.293810527 | 3.44E-10    |
| CTD-3035K23.7 | KDELR3   | 0.355513206 | 1.59E-14    |
| CTD-3035K23.7 | PC       | 0.437735645 | 5.64E-22    |
| CTD-3035K23.7 | C2CD4A   | 0.360389576 | 6.55E-15    |
| CTD-3035K23.7 | PELI1    | 0.418789429 | 4.53E-20    |
| CTD-3035K23.7 | SSX1     | 0.275497899 | 4.36E-09    |
| CTD-3035K23.7 | MROH6    | 0.503855992 | 1.22E-29    |
| CTD-3035K23.7 | ESPN     | 0.554397201 | 9.70E-37    |
| CTD-3035K23.7 | BMP1     | 0.605782626 | 2.56E-45    |
| CTD-3035K23.7 | TM4SF4   | 0.479100739 | 1.42E-26    |
| CTD-3035K23.7 | CORO2A   | 0.373111399 | 6.00E-16    |
| CTD-3035K23.7 | CD164L2  | 0.496500818 | 1.06E-28    |
| CTD-3035K23.7 | CTSS     | 0.22003096  | 3.25E-06    |
| CTD-3035K23.7 | CLU      | 0.652856194 | 1.12E-54    |
| CTD-3035K23.7 | TMSB4X   | 0.467717805 | 3.03E-25    |

|               |          |             |          |
|---------------|----------|-------------|----------|
| CTD-3035K23.7 | WNT10A   | 0.525987186 | 1.33E-32 |
| CTD-3035K23.7 | NAPSA    | 0.507849992 | 3.69E-30 |
| CTD-3035K23.7 | PLEKHA4  | 0.55459166  | 9.06E-37 |
| CTD-3035K23.7 | SFTPA1   | 0.26922929  | 9.98E-09 |
| CTD-3035K23.7 | C1orf116 | 0.328770755 | 1.59E-12 |
| CTD-3035K23.7 | TM4SF1   | 0.380800831 | 1.34E-16 |
| CTD-3035K23.7 | SEL1L3   | 0.35333047  | 2.36E-14 |
| CTD-3035K23.7 | VASN     | 0.655140486 | 3.58E-55 |
| CTD-3035K23.7 | NPTXR    | 0.389936011 | 2.16E-17 |
| CTD-3035K23.7 | PDE4C    | 0.427817664 | 5.80E-21 |
| CTD-3035K23.7 | CDC42EP1 | 0.605303641 | 3.13E-45 |
| CTD-3035K23.7 | ENDOD1   | 0.3653936   | 2.59E-15 |
| CTD-3035K23.7 | RYR1     | 0.522706184 | 3.78E-32 |
| CTD-3035K23.7 | IL1RAP   | 0.473884612 | 5.86E-26 |
| CTD-3035K23.7 | SLC35F2  | 0.493692011 | 2.37E-28 |
| CTD-3035K23.7 | ISYNA1   | 0.693493038 | 3.28E-64 |
| CTD-3035K23.7 | HLA-G    | 0.303249807 | 8.64E-11 |
| CTD-3035K23.7 | CDKN2B   | 0.377257591 | 2.69E-16 |
| CTD-3035K23.7 | ALDH1A3  | 0.338390877 | 3.20E-13 |
| CTD-3035K23.7 | CLIP3    | 0.551729239 | 2.47E-36 |
| CTD-3035K23.7 | ULBP2    | 0.42820871  | 5.30E-21 |
| CTD-3035K23.7 | ETHE1    | 0.499223724 | 4.78E-29 |
| CTD-3035K23.7 | XPR1     | 0.39873064  | 3.51E-18 |
| CTD-3035K23.7 | SPTBN2   | 0.328435309 | 1.68E-12 |
| CTD-3035K23.7 | IVL      | 0.396854765 | 5.19E-18 |
| CTD-3035K23.7 | MARCO    | 0.298490027 | 1.74E-10 |
| CTD-3035K23.7 | PLXND1   | 0.415574968 | 9.27E-20 |
| CTD-3035K23.7 | EMILIN2  | 0.410877454 | 2.61E-19 |
| CTD-3035K23.7 | PLAUR    | 0.444260592 | 1.17E-22 |
| CTD-3035K23.7 | CDC42EP5 | 0.634800575 | 6.80E-51 |
| CTD-3035K23.7 | TRPC5    | 0.38200454  | 1.06E-16 |
| CTD-3035K23.7 | TMEM100  | 0.475550067 | 3.74E-26 |
| CTD-3035K23.7 | QSOX1    | 0.537942643 | 2.70E-34 |
| CTD-3035K23.7 | ARHGAP23 | 0.497820952 | 7.19E-29 |
| CTD-3035K23.7 | MDFI     | 0.509088232 | 2.54E-30 |
| CTD-3035K23.7 | FSTL3    | 0.608538102 | 8.01E-46 |
| CTD-3035K23.7 | INF2     | 0.466584949 | 4.08E-25 |
| CTD-3035K23.7 | TGFBR1   | 0.358908226 | 8.59E-15 |
| CTD-3035K23.7 | TGFBI    | 0.376364582 | 3.20E-16 |
| CTD-3035K23.7 | ERBB3    | 0.358070109 | 1.00E-14 |
| CTD-3035K23.7 | CCL18    | 0.282064546 | 1.79E-09 |
| CTD-3035K23.7 | CCL17    | 0.455324493 | 7.45E-24 |
| CTD-3035K23.7 | C16orf45 | 0.53324669  | 1.27E-33 |
| CTD-3035K23.7 | PRDM1    | 0.362573447 | 4.38E-15 |
| CTD-3035K23.7 | TRIM47   | 0.50550783  | 7.46E-30 |
| CTD-3035K23.7 | CNFN     | 0.519567038 | 1.01E-31 |
| CTD-3035K23.7 | ARMCX3   | 0.377304255 | 2.67E-16 |
| CTD-3035K23.7 | RAMP1    | 0.544471135 | 3.00E-35 |
| CTD-3035K23.7 | GABRD    | 0.354657501 | 1.86E-14 |
| CTD-3035K23.7 | COL13A1  | 0.50592001  | 6.59E-30 |
| CTD-3035K23.7 | S100A5   | 0.461515397 | 1.53E-24 |

|               |           |             |          |
|---------------|-----------|-------------|----------|
| CTD-3035K23.7 | MISP      | 0.438389374 | 4.82E-22 |
| CTD-3035K23.7 | HES6      | 0.412033997 | 2.03E-19 |
| CTD-3035K23.7 | PSD3      | 0.284659745 | 1.25E-09 |
| CTD-3035K23.7 | DOK7      | 0.579893611 | 8.32E-41 |
| CTD-3035K23.7 | ZMAT3     | 0.281187139 | 2.02E-09 |
| CTD-3035K23.7 | MFAP2     | 0.521574463 | 5.40E-32 |
| CTD-3035K23.7 | TMEM79    | 0.476604486 | 2.81E-26 |
| CTD-3035K23.7 | SLC1A5    | 0.466754303 | 3.90E-25 |
| CTD-3035K23.7 | BBC3      | 0.565565053 | 1.77E-38 |
| CTD-3035K23.7 | HLA-DQB2  | 0.368085249 | 1.56E-15 |
| CTD-3035K23.7 | C1QL1     | 0.566308991 | 1.35E-38 |
| CTD-3035K23.7 | TMEM215   | 0.515947057 | 3.12E-31 |
| CTD-3035K23.7 | PNP       | 0.317468015 | 9.78E-12 |
| CTD-3035K23.7 | ARNTL     | 0.531511593 | 2.24E-33 |
| CTD-3035K23.7 | CLDN2     | 0.457596161 | 4.18E-24 |
| CTD-3035K23.7 | MVP       | 0.54131199  | 8.74E-35 |
| CTD-3035K23.7 | LGALS1    | 0.614436978 | 6.39E-47 |
| CTD-3035K23.7 | BIRC7     | 0.484479501 | 3.22E-27 |
| CTD-3035K23.7 | COL8A1    | 0.434740464 | 1.15E-21 |
| CTD-3035K23.7 | PERP      | 0.334348936 | 6.32E-13 |
| CTD-3035K23.7 | GJA4      | 0.451537844 | 1.93E-23 |
| CTD-3035K23.7 | IGFL2     | 0.485560534 | 2.38E-27 |
| CTD-3035K23.7 | DAPK2     | 0.452203345 | 1.64E-23 |
| CTD-3035K23.7 | MAMLD1    | 0.480424026 | 9.89E-27 |
| CTD-3035K23.7 | ETV5      | 0.384285351 | 6.74E-17 |
| CTD-3035K23.7 | RUNX1     | 0.428389694 | 5.08E-21 |
| CTD-3035K23.7 | LONRF2    | 0.40130116  | 2.04E-18 |
| CTD-3035K23.7 | SPOCK1    | 0.406150581 | 7.26E-19 |
| CTD-3035K23.7 | XKRX      | 0.453556899 | 1.16E-23 |
| CTD-3035K23.7 | TGFB1     | 0.521036616 | 6.39E-32 |
| CTD-3035K23.7 | ERP27     | 0.349994738 | 4.27E-14 |
| CTD-3035K23.7 | TNFRSF10C | 0.310718682 | 2.79E-11 |
| CTD-3035K23.7 | PALM      | 0.596888286 | 1.01E-43 |
| CTD-3035K23.7 | TSC22D1   | 0.583300262 | 2.24E-41 |
| CTD-3035K23.7 | TGM2      | 0.310008502 | 3.11E-11 |
| CTD-3035K23.7 | UBE2QL1   | 0.452099804 | 1.68E-23 |
| CTD-3035K23.7 | ECE1      | 0.53543907  | 6.18E-34 |
| CTD-3035K23.7 | COL8A2    | 0.555687212 | 6.16E-37 |
| CTD-3035K23.7 | HIST3H2A  | 0.359823503 | 7.27E-15 |
| CTD-3035K23.7 | TNFRSF21  | 0.385013119 | 5.83E-17 |
| CTD-3035K23.7 | SOX4      | 0.440316377 | 3.04E-22 |
| CTD-3035K23.7 | ELF3      | 0.43550511  | 9.58E-22 |
| CTD-3035K23.7 | TPD52L1   | 0.438941547 | 4.22E-22 |
| CTD-3035K23.7 | INHBB     | 0.569389841 | 4.35E-39 |
| CTD-3035K23.7 | HPN       | 0.52079762  | 6.89E-32 |
| CTD-3035K23.7 | MMP7      | 0.349489214 | 4.67E-14 |
| CTD-3035K23.7 | RAB27A    | 0.404933332 | 9.43E-19 |
| CTD-3035K23.7 | IGF2BP2   | 0.487685108 | 1.31E-27 |
| CTD-3035K23.7 | ITGB4     | 0.533801983 | 1.06E-33 |
| CTD-3035K23.7 | PPP1R1B   | 0.549807484 | 4.81E-36 |
| CTD-3035K23.7 | NPDC1     | 0.647888481 | 1.31E-53 |

|               |            |             |          |
|---------------|------------|-------------|----------|
| CTD-3035K23.7 | CCL13      | 0.443509294 | 1.40E-22 |
| CTD-3035K23.7 | SPINT1     | 0.460263114 | 2.11E-24 |
| CTD-3035K23.7 | HEY2       | 0.459691509 | 2.45E-24 |
| CTD-3035K23.7 | CST2       | 0.438178781 | 5.07E-22 |
| CTD-3035K23.7 | ADM        | 0.331049656 | 1.09E-12 |
| CTD-3035K23.7 | VSTM2L     | 0.319811595 | 6.75E-12 |
| CTD-3035K23.7 | FAM84A     | 0.443060222 | 1.56E-22 |
| CTD-3035K23.7 | P4HA2      | 0.373963559 | 5.10E-16 |
| CTD-3035K23.7 | LPL        | 0.485714278 | 2.28E-27 |
| CTD-3035K23.7 | TMEM173    | 0.549476861 | 5.39E-36 |
| CTD-3035K23.7 | DHRS3      | 0.553635676 | 1.27E-36 |
| CTD-3035K23.7 | SCN1B      | 0.61534417  | 4.31E-47 |
| CTD-3035K23.7 | GLT1D1     | 0.456516762 | 5.51E-24 |
| CTD-3035K23.7 | PHYHIP     | 0.483666004 | 4.04E-27 |
| CTD-3035K23.7 | BHLHE40    | 0.374285813 | 4.79E-16 |
| CTD-3035K23.7 | BID        | 0.515711047 | 3.36E-31 |
| CTD-3035K23.7 | POSTN      | 0.201606422 | 2.08E-05 |
| CTD-3035K23.7 | ITGA3      | 0.436759236 | 7.11E-22 |
| CTD-3035K23.7 | RSPO4      | 0.553499228 | 1.33E-36 |
| CTD-3035K23.7 | ADAMTS9    | 0.440403607 | 2.97E-22 |
| CTD-3035K23.7 | ABTB2      | 0.472832604 | 7.77E-26 |
| CTD-3035K23.7 | KCNQ3      | 0.463108798 | 1.01E-24 |
| CTD-3035K23.7 | ANXA1      | 0.467715252 | 3.03E-25 |
| CTD-3035K23.7 | S100A11    | 0.575499062 | 4.43E-40 |
| CTD-3035K23.7 | CEACAM6    | 0.319575093 | 7.01E-12 |
| CTD-3035K23.7 | IER5L      | 0.600841153 | 2.00E-44 |
| CTD-3035K23.7 | KRT80      | 0.306375904 | 5.40E-11 |
| CTD-3035K23.7 | CDH6       | 0.467666318 | 3.07E-25 |
| CTD-3035K23.7 | UNC5B      | 0.413120755 | 1.60E-19 |
| CTD-3035K23.7 | PLEKHN1    | 0.64996186  | 4.73E-54 |
| CTD-3035K23.7 | SYTL1      | 0.639372562 | 7.92E-52 |
| CTD-3035K23.7 | TMEM163    | 0.536443421 | 4.43E-34 |
| CTD-3035K23.7 | C4orf48    | 0.575961736 | 3.72E-40 |
| CTD-3035K23.7 | B3GNT7     | 0.483132269 | 4.68E-27 |
| CTD-3035K23.7 | BAIAP3     | 0.542485411 | 5.88E-35 |
| CTD-3035K23.7 | PHLDA2     | 0.509652461 | 2.14E-30 |
| CTD-3035K23.7 | GAP43      | 0.617566465 | 1.64E-47 |
| CTD-3035K23.7 | S100A1     | 0.365836984 | 2.39E-15 |
| CTD-3035K23.7 | PTPRE      | 0.422980725 | 1.76E-20 |
| CTD-3035K23.7 | CCND1      | 0.341095149 | 2.01E-13 |
| CTD-3035K23.7 | ST6GALNAC5 | 0.421002675 | 2.75E-20 |
| CTD-3035K23.7 | KRT17      | 0.408205947 | 4.66E-19 |
| CTD-3035K23.7 | HPCAL4     | 0.509605371 | 2.17E-30 |
| CTD-3035K23.7 | GABBR2     | 0.345576644 | 9.28E-14 |
| CTD-3035K23.7 | DIRAS3     | 0.562826031 | 4.80E-38 |
| CTD-3035K23.7 | SERINC2    | 0.386524396 | 4.30E-17 |
| CTD-3035K23.7 | PTCHD4     | 0.460464523 | 2.01E-24 |
| CTD-3035K23.7 | EPS8       | 0.352138894 | 2.92E-14 |
| CTD-3035K23.7 | LY6E       | 0.56609666  | 1.46E-38 |
| CTD-3035K23.7 | UPP1       | 0.601448359 | 1.56E-44 |
| CTD-3035K23.7 | AHNAK2     | 0.411667205 | 2.19E-19 |



|               |         |             |          |
|---------------|---------|-------------|----------|
| CTD-3035K23.7 | PLXNC1  | 0.415486319 | 9.46E-20 |
| CTD-3035K23.7 | TNC     | 0.390389749 | 1.97E-17 |
| CTD-3035K23.7 | DUSP4   | 0.412808003 | 1.71E-19 |
| CTD-3035K23.7 | NRCAM   | 0.378614833 | 2.07E-16 |
| CTD-3035K23.7 | NRP2    | 0.458989272 | 2.93E-24 |
| CTD-3035K23.7 | CTSC    | 0.391993363 | 1.42E-17 |
| CTD-3035K23.7 | AMIGO2  | 0.561252629 | 8.47E-38 |
| CTD-3035K23.7 | NAB2    | 0.549283395 | 5.77E-36 |
| CTD-3035K23.7 | TBC1D2  | 0.447305699 | 5.53E-23 |
| CTD-3035K23.7 | PHLDA3  | 0.551140188 | 3.03E-36 |
| CTD-3035K23.7 | PTP4A3  | 0.538732677 | 2.07E-34 |
| CTD-3035K23.7 | CRABP2  | 0.312486827 | 2.13E-11 |
| CTD-3035K23.7 | GOS2    | 0.537467913 | 3.16E-34 |
| CTD-3035K23.7 | S100A6  | 0.53926939  | 1.73E-34 |
| CTD-3035K23.7 | FOXQ1   | 0.442994835 | 1.59E-22 |
| CTD-3035K23.7 | LRG1    | 0.507949845 | 3.58E-30 |
| CTD-3035K23.7 | LAMP5   | 0.54199437  | 6.94E-35 |
| CTD-3035K23.7 | ALDH3B1 | 0.477477354 | 2.22E-26 |
| CTD-3035K23.7 | CDH2    | 0.258551023 | 3.90E-08 |
| CTD-3035K23.7 | SCG5    | 0.512275603 | 9.65E-31 |
| CTD-3035K23.7 | ZCCHC16 | 0.412419527 | 1.86E-19 |
| CTD-3035K23.7 | GRB7    | 0.563904705 | 3.25E-38 |
| CTD-3035K23.7 | TIAM1   | 0.551226709 | 2.94E-36 |
| CTD-3035K23.7 | FXYD5   | 0.534386637 | 8.74E-34 |
| CTD-3035K23.7 | CLDN9   | 0.435151226 | 1.04E-21 |
| CTD-3035K23.7 | FAM43A  | 0.460404384 | 2.04E-24 |
| CTD-3035K23.7 | CHST2   | 0.495626869 | 1.36E-28 |
| CTD-3035K23.7 | HMGA2   | 0.522933975 | 3.51E-32 |
| CTD-3035K23.7 | GALNT7  | 0.402652161 | 1.53E-18 |
| CTD-3035K23.7 | CBLN1   | 0.351539064 | 3.25E-14 |
| CTD-3035K23.7 | STRA6   | 0.567350077 | 9.23E-39 |
| CTD-3035K23.7 | MUC21   | 0.318675583 | 8.09E-12 |
| CTD-3035K23.7 | PRR36   | 0.638293889 | 1.32E-51 |
| CTD-3035K23.7 | NFE2L3  | 0.451042406 | 2.19E-23 |
| CTD-3035K23.7 | NR1D1   | 0.323377813 | 3.82E-12 |
| CTD-3035K23.7 | MUC1    | 0.402545641 | 1.57E-18 |
| CTD-3035K23.7 | NAT8L   | 0.487125276 | 1.53E-27 |
| CTD-3035K23.7 | APOC1   | 0.471971793 | 9.79E-26 |
| CTD-3035K23.7 | EVA1A   | 0.557286287 | 3.50E-37 |
| CTD-3035K23.7 | ENTPD1  | 0.389712192 | 2.26E-17 |
| CTD-3035K23.7 | COL1A1  | 0.404542286 | 1.03E-18 |
| CTD-3035K23.7 | FNDC4   | 0.491385221 | 4.60E-28 |
| CTD-3035K23.7 | FRMD3   | 0.284329831 | 1.31E-09 |
| CTD-3035K23.7 | SHROOM4 | 0.450090109 | 2.77E-23 |
| CTD-3035K23.7 | NELL2   | 0.484066411 | 3.61E-27 |
| CTD-3035K23.7 | EPHB3   | 0.469771043 | 1.76E-25 |
| CTD-3035K23.7 | TMC6    | 0.521741264 | 5.12E-32 |
| CTD-3035K23.7 | NOD1    | 0.579424696 | 9.96E-41 |
| CTD-3035K23.7 | GGCT    | 0.557716906 | 3.00E-37 |
| CTD-3035K23.7 | ICAM1   | 0.365022979 | 2.78E-15 |
| CTD-3035K23.7 | PRSS23  | 0.455988844 | 6.30E-24 |

|               |           |             |          |
|---------------|-----------|-------------|----------|
| CTD-3035K23.7 | CFI       | 0.562123652 | 6.19E-38 |
| CTD-3035K23.7 | CD55      | 0.423331489 | 1.62E-20 |
| CTD-3035K23.7 | RASD2     | 0.592297151 | 6.45E-43 |
| CTD-3035K23.7 | KLK11     | 0.44100374  | 2.57E-22 |
| CTD-3035K23.7 | ICAM5     | 0.633109873 | 1.49E-50 |
| CTD-3035K23.7 | ADORA1    | 0.428069425 | 5.47E-21 |
| CTD-3035K23.7 | ITGA2     | 0.352618446 | 2.68E-14 |
| CTD-3035K23.7 | ABCC3     | 0.535197947 | 6.69E-34 |
| CTD-3035K23.7 | MFGE8     | 0.61554955  | 3.95E-47 |
| CTD-3035K23.7 | STK32A    | 0.486067027 | 2.07E-27 |
| CTD-3035K23.7 | CYSLTR2   | 0.490290094 | 6.28E-28 |
| CTD-3035K23.7 | LAD1      | 0.413989225 | 1.32E-19 |
| CTD-3035K23.7 | MGAT3     | 0.453192377 | 1.28E-23 |
| CTD-3035K23.7 | IGFBP6    | 0.670852667 | 1.04E-58 |
| CTD-3035K23.7 | CYP2S1    | 0.477577349 | 2.16E-26 |
| CTD-3035K23.7 | KCNJ2     | 0.514377349 | 5.07E-31 |
| CTD-3035K23.7 | FAM20A    | 0.581752674 | 4.07E-41 |
| CTD-3035K23.7 | TGFA      | 0.370418616 | 1.00E-15 |
| CTD-3035K23.7 | MXRA8     | 0.654154006 | 5.88E-55 |
| CTD-3035K23.7 | C8orf4    | 0.450655899 | 2.41E-23 |
| CTD-3035K23.7 | CLDN10    | 0.582268752 | 3.34E-41 |
| CTD-3035K23.7 | PDE5A     | 0.356275866 | 1.39E-14 |
| CTD-3035K23.7 | APOE      | 0.505624704 | 7.20E-30 |
| CTD-3035K23.7 | SPOCK2    | 0.428295514 | 5.19E-21 |
| CTD-3035K23.7 | TENM1     | 0.515447229 | 3.65E-31 |
| CTD-3035K23.7 | SLIT1     | 0.511967248 | 1.06E-30 |
| CTD-3035K23.7 | CXCL14    | 0.553635534 | 1.27E-36 |
| CTD-3035K23.7 | ECM1      | 0.388563167 | 2.85E-17 |
| CTD-3035K23.7 | DUSP5     | 0.449088028 | 3.56E-23 |
| CTD-3035K23.7 | SEZ6L2    | 0.370575772 | 9.75E-16 |
| CTD-3035K23.7 | THRSP     | 0.243358676 | 2.44E-07 |
| CTD-3035K23.7 | C19orf33  | 0.527183991 | 9.07E-33 |
| CTD-3035K23.7 | MPZL2     | 0.428415509 | 5.05E-21 |
| CTD-3035K23.7 | CTSH      | 0.531213025 | 2.47E-33 |
| CTD-3035K23.7 | CYP1B1    | 0.389786231 | 2.22E-17 |
| CTD-3035K23.7 | ALOX5     | 0.401442146 | 1.98E-18 |
| CTD-3035K23.7 | SYTL5     | 0.438005294 | 5.29E-22 |
| CTD-3035K23.7 | TNFRSF12A | 0.605202795 | 3.26E-45 |
| CTD-3035K23.7 | DUSP6     | 0.556548307 | 4.54E-37 |
| CTD-3035K23.7 | ALOX15B   | 0.403140082 | 1.38E-18 |
| CTD-3035K23.7 | SDC4      | 0.560841016 | 9.82E-38 |
| CTD-3035K23.7 | MDK       | 0.607275891 | 1.37E-45 |
| CTD-3035K23.7 | KRT19     | 0.505390673 | 7.72E-30 |
| CTD-3035K23.7 | MET       | 0.327567122 | 1.94E-12 |
| CTD-3035K23.7 | TESC      | 0.528315286 | 6.30E-33 |
| CTD-3035K23.7 | CXCL17    | 0.40450748  | 1.03E-18 |
| CTD-3035K23.7 | NPC2      | 0.554869945 | 8.22E-37 |
| CTD-3035K23.7 | COMP      | 0.504548584 | 9.92E-30 |
| CTD-3035K23.7 | TUSC3     | 0.621095393 | 3.46E-48 |
| CTD-3035K23.7 | TMPRSS4   | 0.496201594 | 1.15E-28 |
| CTD-3035K23.7 | LGALS3    | 0.525437973 | 1.59E-32 |

|               |          |             |          |
|---------------|----------|-------------|----------|
| CTD-3035K23.7 | CRLF1    | 0.554287844 | 1.01E-36 |
| CTD-3035K23.7 | CTXN1    | 0.654092875 | 6.06E-55 |
| CTD-3035K23.7 | PCSK1N   | 0.589328352 | 2.10E-42 |
| CTD-3035K23.7 | NMU      | 0.3150025   | 1.44E-11 |
| CTD-3035K23.7 | GALE     | 0.601917982 | 1.28E-44 |
| CTD-3035K23.7 | PCSK2    | 0.362448205 | 4.48E-15 |
| CTD-3035K23.7 | GJB3     | 0.561513042 | 7.71E-38 |
| CTD-3035K23.7 | SLPI     | 0.479613141 | 1.24E-26 |
| CTD-3035K23.7 | AGR2     | 0.427883902 | 5.71E-21 |
| CTD-3035K23.7 | MRC2     | 0.799349988 | 1.01E-98 |
| CTD-3035K23.7 | GOLT1A   | 0.611094721 | 2.69E-46 |
| CTD-3035K23.7 | SLC27A6  | 0.505035884 | 8.58E-30 |
| CTD-3035K23.7 | KCNN4    | 0.598813729 | 4.61E-44 |
| CTD-3035K23.7 | ETV4     | 0.60435938  | 4.65E-45 |
| CTD-3035K23.7 | SYT12    | 0.574914125 | 5.53E-40 |
| CTD-3035K23.7 | PVRL4    | 0.444498878 | 1.10E-22 |
| CTD-3035K23.7 | PLCD3    | 0.547971824 | 9.06E-36 |
| CTD-3035K23.7 | PLAU     | 0.514769388 | 4.49E-31 |
| CTD-3035K23.7 | LRRK2    | 0.372219384 | 7.12E-16 |
| CTD-3035K23.7 | SFN      | 0.455870977 | 6.49E-24 |
| CTD-3035K23.7 | LPAR5    | 0.521122002 | 6.22E-32 |
| CTD-3035K23.7 | NGEF     | 0.497521249 | 7.85E-29 |
| CTD-3035K23.7 | DTX4     | 0.402700811 | 1.52E-18 |
| CTD-3035K23.7 | CST6     | 0.584429004 | 1.44E-41 |
| CTD-3035K23.7 | QPCT     | 0.553355121 | 1.40E-36 |
| CTD-3035K23.7 | TIMP1    | 0.722034697 | 6.44E-72 |
| CTD-3035K23.7 | CAMK2N1  | 0.595904076 | 1.51E-43 |
| CTD-3035K23.7 | KLHDC8A  | 0.576660285 | 2.86E-40 |
| CTD-3035K23.7 | PDLIM4   | 0.641497996 | 2.88E-52 |
| CTD-3035K23.7 | SCEL     | 0.38607775  | 4.71E-17 |
| CTD-3035K23.7 | LCN2     | 0.392869777 | 1.18E-17 |
| CTD-3035K23.7 | PROS1    | 0.398286689 | 3.85E-18 |
| CTD-3035K23.7 | GABRB2   | 0.465166008 | 5.92E-25 |
| CTD-3035K23.7 | TMPRSS6  | 0.495994511 | 1.22E-28 |
| CTD-3035K23.7 | KLK7     | 0.462708033 | 1.12E-24 |
| CTD-3035K23.7 | PDZK1IP1 | 0.422167713 | 2.11E-20 |
| CTD-3035K23.7 | CDH3     | 0.569822871 | 3.71E-39 |
| CTD-3035K23.7 | LRP4     | 0.479709733 | 1.20E-26 |
| CTD-3035K23.7 | IGSF1    | 0.421795957 | 2.30E-20 |
| CTD-3035K23.7 | B3GNT3   | 0.43829491  | 4.93E-22 |
| CTD-3035K23.7 | CLDN1    | 0.510377534 | 1.72E-30 |
| CTD-3035K23.7 | GDF15    | 0.410850222 | 2.62E-19 |
| CTD-3035K23.7 | ARHGAP36 | 0.416973273 | 6.80E-20 |
| CTD-3035K23.7 | LAMB3    | 0.531165226 | 2.51E-33 |
| CTD-3035K23.7 | KLK10    | 0.513639795 | 6.36E-31 |
| CTD-3035K23.7 | DPP4     | 0.350859662 | 3.66E-14 |
| CTD-3035K23.7 | METTL7B  | 0.53465783  | 7.99E-34 |
| CTD-3035K23.7 | LIPH     | 0.438259025 | 4.97E-22 |
| CTD-3035K23.7 | CLDN16   | 0.423137597 | 1.70E-20 |
| CTD-3035K23.7 | CHI3L1   | 0.435600992 | 9.37E-22 |
| CTD-3035K23.7 | SLC22A31 | 0.661459222 | 1.43E-56 |

|               |           |              |          |
|---------------|-----------|--------------|----------|
| CTD-3035K23.7 | TACSTD2   | 0.44971807   | 3.04E-23 |
| CTD-3035K23.7 | SFTPB     | 0.467171022  | 3.50E-25 |
| CTD-3035K23.7 | RXRG      | 0.52028658   | 8.09E-32 |
| CTD-3035K23.7 | DCSTAMP   | 0.407031684  | 6.01E-19 |
| CTD-3035K23.7 | CITED1    | 0.446076111  | 7.48E-23 |
| CTD-3035K23.7 | SERPINA1  | 0.559428316  | 1.63E-37 |
| CTD-3035K23.7 | PRR15     | 0.62850498   | 1.24E-49 |
| CTD-3035K23.7 | SLC34A2   | 0.329926871  | 1.32E-12 |
| CTD-3035K23.7 | FN1       | 0.374387511  | 4.70E-16 |
| CTD-3035K23.7 | ZCCHC12   | 0.524677866  | 2.02E-32 |
| UNC5B-AS1     | TFF3      | -0.501168676 | 2.70E-29 |
| UNC5B-AS1     | CCL21     | -0.343645166 | 1.30E-13 |
| UNC5B-AS1     | TPO       | -0.593789329 | 3.54E-43 |
| UNC5B-AS1     | MT1G      | -0.49247768  | 3.36E-28 |
| UNC5B-AS1     | DI01      | -0.501076907 | 2.77E-29 |
| UNC5B-AS1     | DPT       | -0.31517808  | 1.40E-11 |
| UNC5B-AS1     | CDH16     | -0.506145071 | 6.16E-30 |
| UNC5B-AS1     | CRABP1    | -0.549579449 | 5.21E-36 |
| UNC5B-AS1     | SLC26A7   | -0.719477014 | 3.46E-71 |
| UNC5B-AS1     | MT1H      | -0.460247559 | 2.12E-24 |
| UNC5B-AS1     | SLC26A4   | -0.672797199 | 3.65E-59 |
| UNC5B-AS1     | SLC5A8    | -0.586869655 | 5.55E-42 |
| UNC5B-AS1     | PKHD1L1   | -0.555956162 | 5.60E-37 |
| UNC5B-AS1     | TFCP2L1   | -0.644780176 | 5.94E-53 |
| UNC5B-AS1     | WSCD2     | -0.595650126 | 1.67E-43 |
| UNC5B-AS1     | IPCEF1    | -0.555005932 | 7.83E-37 |
| UNC5B-AS1     | SLC5A5    | -0.39407298  | 9.24E-18 |
| UNC5B-AS1     | MT1F      | -0.444696207 | 1.05E-22 |
| UNC5B-AS1     | FOSB      | -0.327062097 | 2.10E-12 |
| UNC5B-AS1     | SEMA3D    | -0.577629719 | 1.98E-40 |
| UNC5B-AS1     | BMP8A     | -0.547832889 | 9.51E-36 |
| UNC5B-AS1     | MATN2     | -0.69703168  | 4.07E-65 |
| UNC5B-AS1     | PLA2R1    | -0.548698811 | 7.06E-36 |
| UNC5B-AS1     | COL23A1   | -0.559526601 | 1.57E-37 |
| UNC5B-AS1     | HGD       | -0.573552984 | 9.23E-40 |
| UNC5B-AS1     | TCEAL2    | -0.362484495 | 4.45E-15 |
| UNC5B-AS1     | CHRD1     | -0.316636431 | 1.11E-11 |
| UNC5B-AS1     | TNFRSF11B | -0.508402852 | 3.13E-30 |
| UNC5B-AS1     | FAM167A   | -0.650334986 | 3.93E-54 |
| UNC5B-AS1     | KIT       | -0.619618072 | 6.64E-48 |
| UNC5B-AS1     | SLC4A4    | -0.703046473 | 1.09E-66 |
| UNC5B-AS1     | SMOC2     | -0.416336645 | 7.83E-20 |
| UNC5B-AS1     | FHL1      | -0.625399541 | 5.05E-49 |
| UNC5B-AS1     | OTOS      | -0.424068672 | 1.37E-20 |
| UNC5B-AS1     | IGFBPL1   | -0.671996759 | 5.61E-59 |
| UNC5B-AS1     | HBB       | -0.401546179 | 1.94E-18 |
| UNC5B-AS1     | BEX1      | -0.388596064 | 2.83E-17 |
| UNC5B-AS1     | FABP4     | -0.588008086 | 3.55E-42 |
| UNC5B-AS1     | LMOD1     | -0.585782561 | 8.50E-42 |
| UNC5B-AS1     | SOD3      | -0.412737499 | 1.74E-19 |
| UNC5B-AS1     | TMEM171   | -0.526982101 | 9.67E-33 |

|           |            |              |             |
|-----------|------------|--------------|-------------|
| UNC5B-AS1 | PI16       | -0.334382227 | 6.28E-13    |
| UNC5B-AS1 | ZMAT4      | -0.55638871  | 4.81E-37    |
| UNC5B-AS1 | MFAP4      | -0.25759526  | 4.39E-08    |
| UNC5B-AS1 | CWH43      | -0.524542502 | 2.11E-32    |
| UNC5B-AS1 | SPX        | -0.702255583 | 1.77E-66    |
| UNC5B-AS1 | APOD       | -0.116261116 | 0.014798791 |
| UNC5B-AS1 | DPP6       | -0.538647303 | 2.13E-34    |
| UNC5B-AS1 | MMRN1      | -0.520473144 | 7.63E-32    |
| UNC5B-AS1 | WDR72      | -0.684197164 | 6.83E-62    |
| UNC5B-AS1 | MPPED2     | -0.657894114 | 8.90E-56    |
| UNC5B-AS1 | PAPSS2     | -0.537267784 | 3.37E-34    |
| UNC5B-AS1 | DCN        | -0.187035276 | 8.06E-05    |
| UNC5B-AS1 | SORBS2     | -0.6308501   | 4.23E-50    |
| UNC5B-AS1 | EGR2       | -0.392793908 | 1.20E-17    |
| UNC5B-AS1 | EDN3       | -0.502184894 | 2.00E-29    |
| UNC5B-AS1 | DIO2       | -0.688089063 | 7.49E-63    |
| UNC5B-AS1 | ITPR1      | -0.636114001 | 3.68E-51    |
| UNC5B-AS1 | CFD        | -0.039602087 | 0.40783199  |
| UNC5B-AS1 | CPXM1      | -0.339614782 | 2.59E-13    |
| UNC5B-AS1 | ELMO1      | -0.599760152 | 3.12E-44    |
| UNC5B-AS1 | GPC3       | -0.463367313 | 9.47E-25    |
| UNC5B-AS1 | MYOC       | -0.31290497  | 1.99E-11    |
| UNC5B-AS1 | DEPTOR     | -0.567871937 | 7.62E-39    |
| UNC5B-AS1 | DGKI       | -0.528491685 | 5.95E-33    |
| UNC5B-AS1 | CARTPT     | -0.48304291  | 4.80E-27    |
| UNC5B-AS1 | IYD        | -0.628324812 | 1.34E-49    |
| UNC5B-AS1 | LYVE1      | -0.414488492 | 1.18E-19    |
| UNC5B-AS1 | CLCNKB     | -0.553885694 | 1.16E-36    |
| UNC5B-AS1 | NCAM1      | -0.467390042 | 3.30E-25    |
| UNC5B-AS1 | HBA2       | -0.264669584 | 1.80E-08    |
| UNC5B-AS1 | GLT8D2     | -0.500356085 | 3.43E-29    |
| UNC5B-AS1 | OGDHL      | -0.554343548 | 9.89E-37    |
| UNC5B-AS1 | LIFR       | -0.694060453 | 2.35E-64    |
| UNC5B-AS1 | CSGALNACT1 | -0.513368183 | 6.91E-31    |
| UNC5B-AS1 | RAP1GAP    | -0.616732799 | 2.36E-47    |
| UNC5B-AS1 | COL9A3     | -0.413935749 | 1.33E-19    |
| UNC5B-AS1 | FBLN1      | -0.141530874 | 0.00295944  |
| UNC5B-AS1 | EFEMP1     | -0.402690955 | 1.52E-18    |
| UNC5B-AS1 | AOX1       | -0.495902595 | 1.26E-28    |
| UNC5B-AS1 | GRIN2C     | -0.502907046 | 1.62E-29    |
| UNC5B-AS1 | C11orf74   | -0.502039705 | 2.09E-29    |
| UNC5B-AS1 | PPARGC1A   | -0.632969873 | 1.59E-50    |
| UNC5B-AS1 | ANGPTL1    | -0.605508288 | 2.87E-45    |
| UNC5B-AS1 | SCARA5     | -0.277503446 | 3.33E-09    |
| UNC5B-AS1 | LTF        | -0.458884003 | 3.01E-24    |
| UNC5B-AS1 | CA4        | -0.565084236 | 2.11E-38    |
| UNC5B-AS1 | TG         | -0.669209826 | 2.49E-58    |
| UNC5B-AS1 | FCGBP      | -0.488820097 | 9.52E-28    |
| UNC5B-AS1 | PBX4       | -0.457720078 | 4.05E-24    |
| UNC5B-AS1 | CYR61      | -0.333985647 | 6.71E-13    |
| UNC5B-AS1 | FOS        | -0.350924395 | 3.62E-14    |

|           |          |              |             |
|-----------|----------|--------------|-------------|
| UNC5B-AS1 | KHDRBS2  | -0.554040014 | 1.10E-36    |
| UNC5B-AS1 | MUM1L1   | -0.409942577 | 3.20E-19    |
| UNC5B-AS1 | RGS16    | -0.539943137 | 1.38E-34    |
| UNC5B-AS1 | MT1M     | -0.427681292 | 5.98E-21    |
| UNC5B-AS1 | LRP2     | -0.638810204 | 1.03E-51    |
| UNC5B-AS1 | MAFB     | -0.518310678 | 1.50E-31    |
| UNC5B-AS1 | KCNK2    | -0.546443016 | 1.53E-35    |
| UNC5B-AS1 | TBC1D4   | -0.621282686 | 3.18E-48    |
| UNC5B-AS1 | MIOX     | -0.516587504 | 2.56E-31    |
| UNC5B-AS1 | TPPP     | -0.625607192 | 4.60E-49    |
| UNC5B-AS1 | FMOD     | -0.51991189  | 9.10E-32    |
| UNC5B-AS1 | CITED2   | -0.497880866 | 7.07E-29    |
| UNC5B-AS1 | RGS8     | -0.563996398 | 3.14E-38    |
| UNC5B-AS1 | ABI3BP   | -0.497760871 | 7.32E-29    |
| UNC5B-AS1 | ADH1B    | -0.351838107 | 3.08E-14    |
| UNC5B-AS1 | OGN      | -0.268366422 | 1.12E-08    |
| UNC5B-AS1 | NR4A1    | -0.28986814  | 6.04E-10    |
| UNC5B-AS1 | FOXJ1    | -0.470411142 | 1.48E-25    |
| UNC5B-AS1 | ALDH1A1  | -0.547888773 | 9.33E-36    |
| UNC5B-AS1 | OCA2     | -0.380887085 | 1.32E-16    |
| UNC5B-AS1 | TMEM139  | -0.263035608 | 2.22E-08    |
| UNC5B-AS1 | ARHGAP24 | -0.619737358 | 6.30E-48    |
| UNC5B-AS1 | SLC25A15 | -0.669099334 | 2.64E-58    |
| UNC5B-AS1 | DES      | -0.277652544 | 3.27E-09    |
| UNC5B-AS1 | GDF10    | -0.441215433 | 2.44E-22    |
| UNC5B-AS1 | KIAA1324 | -0.456025253 | 6.24E-24    |
| UNC5B-AS1 | JUN      | -0.350619159 | 3.82E-14    |
| UNC5B-AS1 | C7       | -0.106146631 | 0.026150847 |
| UNC5B-AS1 | LGI3     | -0.610410217 | 3.61E-46    |
| UNC5B-AS1 | CDON     | -0.668982885 | 2.80E-58    |
| UNC5B-AS1 | BCL2     | -0.672381613 | 4.56E-59    |
| UNC5B-AS1 | HLF      | -0.659856304 | 3.27E-56    |
| UNC5B-AS1 | EGR1     | -0.420142448 | 3.34E-20    |
| UNC5B-AS1 | IP6K3    | -0.529489801 | 4.31E-33    |
| UNC5B-AS1 | SCUBE3   | -0.513344922 | 6.96E-31    |
| UNC5B-AS1 | PKNOX2   | -0.503264194 | 1.45E-29    |
| UNC5B-AS1 | SMAD9    | -0.505083553 | 8.46E-30    |
| UNC5B-AS1 | IQGAP2   | -0.679891522 | 7.57E-61    |
| UNC5B-AS1 | GNA14    | -0.582333055 | 3.25E-41    |
| UNC5B-AS1 | LAYN     | -0.464234566 | 7.55E-25    |
| UNC5B-AS1 | AVPR1A   | -0.675178379 | 1.01E-59    |
| UNC5B-AS1 | PDLIM3   | -0.416862013 | 6.97E-20    |
| UNC5B-AS1 | GPM6A    | -0.634703136 | 7.11E-51    |
| UNC5B-AS1 | SDPR     | -0.592704267 | 5.48E-43    |
| UNC5B-AS1 | CRYAB    | -0.277216453 | 3.46E-09    |
| UNC5B-AS1 | FOXA2    | -0.347741527 | 6.35E-14    |
| UNC5B-AS1 | C8orf88  | -0.613077202 | 1.15E-46    |
| UNC5B-AS1 | ISM1     | -0.418695414 | 4.62E-20    |
| UNC5B-AS1 | BMP2     | -0.30493902  | 6.71E-11    |
| UNC5B-AS1 | ID4      | -0.485605901 | 2.35E-27    |
| UNC5B-AS1 | NUPR1    | -0.300276088 | 1.34E-10    |

|           |          |              |             |
|-----------|----------|--------------|-------------|
| UNC5B-AS1 | SERTM1   | -0.517526796 | 1.91E-31    |
| UNC5B-AS1 | IRS1     | -0.618948454 | 8.92E-48    |
| UNC5B-AS1 | FIBIN    | -0.299609023 | 1.48E-10    |
| UNC5B-AS1 | PODN     | -0.194753971 | 3.99E-05    |
| UNC5B-AS1 | TDRD9    | -0.506650299 | 5.30E-30    |
| UNC5B-AS1 | EPHA3    | -0.425522514 | 9.83E-21    |
| UNC5B-AS1 | AIF1L    | -0.491556724 | 4.38E-28    |
| UNC5B-AS1 | EBF4     | -0.45740236  | 4.40E-24    |
| UNC5B-AS1 | ADM2     | -0.499992695 | 3.81E-29    |
| UNC5B-AS1 | GSTM3    | -0.549775506 | 4.86E-36    |
| UNC5B-AS1 | HSD17B6  | -0.444868115 | 1.01E-22    |
| UNC5B-AS1 | AGR3     | -0.291630573 | 4.70E-10    |
| UNC5B-AS1 | EPHB1    | -0.599729089 | 3.16E-44    |
| UNC5B-AS1 | TMOD1    | -0.361606233 | 5.24E-15    |
| UNC5B-AS1 | WASF3    | -0.678438248 | 1.69E-60    |
| UNC5B-AS1 | SELV     | -0.47062821  | 1.40E-25    |
| UNC5B-AS1 | ENPP1    | -0.508058469 | 3.47E-30    |
| UNC5B-AS1 | SYNE1    | -0.642651419 | 1.66E-52    |
| UNC5B-AS1 | PLCH1    | -0.4816506   | 7.06E-27    |
| UNC5B-AS1 | CCDC146  | -0.581416212 | 4.64E-41    |
| UNC5B-AS1 | SLC16A2  | -0.568877712 | 5.26E-39    |
| UNC5B-AS1 | IER2     | -0.316812583 | 1.08E-11    |
| UNC5B-AS1 | KCNAB1   | -0.528864578 | 5.28E-33    |
| UNC5B-AS1 | SYNDIG1  | -0.436100952 | 8.32E-22    |
| UNC5B-AS1 | C16orf89 | -0.56290618  | 4.66E-38    |
| UNC5B-AS1 | CTGF     | -0.262850509 | 2.27E-08    |
| UNC5B-AS1 | NR4A3    | -0.216639044 | 4.64E-06    |
| UNC5B-AS1 | KIAA1456 | -0.649258434 | 6.68E-54    |
| UNC5B-AS1 | AQP4     | -0.563999611 | 3.14E-38    |
| UNC5B-AS1 | RNF150   | -0.601445332 | 1.56E-44    |
| UNC5B-AS1 | C1S      | -0.067618118 | 0.157263069 |
| UNC5B-AS1 | PFKFB2   | -0.688486778 | 5.96E-63    |
| UNC5B-AS1 | PROX1    | -0.639452022 | 7.63E-52    |
| UNC5B-AS1 | TCF7L1   | -0.555462652 | 6.67E-37    |
| UNC5B-AS1 | HSPB6    | -0.297801578 | 1.93E-10    |
| UNC5B-AS1 | FHDC1    | -0.613530233 | 9.46E-47    |
| UNC5B-AS1 | PRR15L   | -0.573608726 | 9.03E-40    |
| UNC5B-AS1 | SLC1A1   | -0.517929275 | 1.69E-31    |
| UNC5B-AS1 | BTBD11   | -0.618093027 | 1.30E-47    |
| UNC5B-AS1 | TRIM58   | -0.607223396 | 1.40E-45    |
| UNC5B-AS1 | LRIG1    | -0.624982111 | 6.09E-49    |
| UNC5B-AS1 | ROR2     | -0.314271551 | 1.61E-11    |
| UNC5B-AS1 | GPR125   | -0.615454836 | 4.11E-47    |
| UNC5B-AS1 | FLRT1    | -0.543376615 | 4.35E-35    |
| UNC5B-AS1 | PGF      | -0.410782401 | 2.66E-19    |
| UNC5B-AS1 | DUSP1    | -0.322326544 | 4.52E-12    |
| UNC5B-AS1 | PLA2G7   | -0.438977148 | 4.19E-22    |
| UNC5B-AS1 | PLSCR4   | -0.583307767 | 2.23E-41    |
| UNC5B-AS1 | FAM46B   | -0.330437989 | 1.21E-12    |
| UNC5B-AS1 | GLDC     | -0.407070211 | 5.96E-19    |
| UNC5B-AS1 | ZBTB16   | -0.549603456 | 5.16E-36    |

|           |          |              |             |
|-----------|----------|--------------|-------------|
| UNC5B-AS1 | OMD      | -0.187424867 | 7.79E-05    |
| UNC5B-AS1 | HSD11B2  | -0.491088091 | 5.00E-28    |
| UNC5B-AS1 | FGL2     | -0.187560361 | 7.69E-05    |
| UNC5B-AS1 | CLCNKA   | -0.508415635 | 3.12E-30    |
| UNC5B-AS1 | GATM     | -0.619909124 | 5.84E-48    |
| UNC5B-AS1 | TNS3     | -0.600448067 | 2.35E-44    |
| UNC5B-AS1 | TOB1     | -0.360944274 | 5.92E-15    |
| UNC5B-AS1 | MARC2    | -0.652246115 | 1.52E-54    |
| UNC5B-AS1 | LRRC2    | -0.674069488 | 1.84E-59    |
| UNC5B-AS1 | SORD     | -0.529283852 | 4.61E-33    |
| UNC5B-AS1 | RIMS4    | -0.501926943 | 2.16E-29    |
| UNC5B-AS1 | SLC29A4  | -0.485933406 | 2.14E-27    |
| UNC5B-AS1 | SLC39A14 | -0.716984349 | 1.75E-70    |
| UNC5B-AS1 | FAXDC2   | -0.669530664 | 2.10E-58    |
| UNC5B-AS1 | HSPB8    | -0.246409046 | 1.70E-07    |
| UNC5B-AS1 | CCL19    | 0.065335703  | 0.17178446  |
| UNC5B-AS1 | KCNIP3   | -0.528413532 | 6.11E-33    |
| UNC5B-AS1 | CGNL1    | -0.603322986 | 7.16E-45    |
| UNC5B-AS1 | ATF3     | -0.073649789 | 0.123358659 |
| UNC5B-AS1 | SGCD     | -0.405036818 | 9.22E-19    |
| UNC5B-AS1 | STARD13  | -0.643396969 | 1.16E-52    |
| UNC5B-AS1 | LDHD     | -0.573001233 | 1.13E-39    |
| UNC5B-AS1 | RCAN1    | -0.359661914 | 7.49E-15    |
| UNC5B-AS1 | ID3      | -0.265176798 | 1.69E-08    |
| UNC5B-AS1 | SYTL3    | -0.667445359 | 6.33E-58    |
| UNC5B-AS1 | MT1E     | -0.281446353 | 1.95E-09    |
| UNC5B-AS1 | CAMK1D   | -0.64890398  | 7.96E-54    |
| UNC5B-AS1 | PRKCQ    | -0.727712    | 1.44E-73    |
| UNC5B-AS1 | NUAK2    | -0.397190894 | 4.84E-18    |
| UNC5B-AS1 | LIPG     | -0.639827752 | 6.38E-52    |
| UNC5B-AS1 | SLC25A25 | -0.486809682 | 1.68E-27    |
| UNC5B-AS1 | PRKX     | -0.441388398 | 2.34E-22    |
| UNC5B-AS1 | SRPX     | -0.148399107 | 0.001822551 |
| UNC5B-AS1 | FAM189A1 | -0.522869501 | 3.58E-32    |
| UNC5B-AS1 | PLEKHH1  | -0.556840468 | 4.10E-37    |
| UNC5B-AS1 | WNT11    | -0.404515562 | 1.03E-18    |
| UNC5B-AS1 | SNAI1    | -0.334933552 | 5.73E-13    |
| UNC5B-AS1 | FDCSP    | -0.018296931 | 0.702237179 |
| UNC5B-AS1 | MT1X     | -0.314635366 | 1.52E-11    |
| UNC5B-AS1 | ACACB    | -0.69348388  | 3.30E-64    |
| UNC5B-AS1 | ARC      | -0.16821093  | 0.000400711 |
| UNC5B-AS1 | KLK4     | -0.292355852 | 4.24E-10    |
| UNC5B-AS1 | ZFPM2    | -0.347796153 | 6.29E-14    |
| UNC5B-AS1 | AKAP12   | -0.47676101  | 2.69E-26    |
| UNC5B-AS1 | GJB6     | -0.42950667  | 3.92E-21    |
| UNC5B-AS1 | ERO1LB   | -0.635247086 | 5.52E-51    |
| UNC5B-AS1 | DNALI1   | -0.353045019 | 2.48E-14    |
| UNC5B-AS1 | HKDC1    | -0.305379853 | 6.28E-11    |
| UNC5B-AS1 | ZFP36L2  | -0.497179476 | 8.67E-29    |
| UNC5B-AS1 | CAPSL    | -0.392175555 | 1.37E-17    |
| UNC5B-AS1 | CYP7B1   | -0.6290106   | 9.82E-50    |



|           |          |              |             |
|-----------|----------|--------------|-------------|
| UNC5B-AS1 | CPQ      | -0.47837669  | 1.73E-26    |
| UNC5B-AS1 | RPS6KA6  | -0.618935639 | 8.97E-48    |
| UNC5B-AS1 | TLE1     | -0.47300712  | 7.42E-26    |
| UNC5B-AS1 | TP53INP2 | -0.610214481 | 3.92E-46    |
| UNC5B-AS1 | KATNAL2  | -0.609741025 | 4.80E-46    |
| UNC5B-AS1 | SGPP2    | -0.335088156 | 5.58E-13    |
| UNC5B-AS1 | CTH      | -0.563516227 | 3.74E-38    |
| UNC5B-AS1 | KIF12    | -0.279144035 | 2.67E-09    |
| UNC5B-AS1 | TMEM220  | -0.612749839 | 1.32E-46    |
| UNC5B-AS1 | CENPJ    | -0.495282957 | 1.50E-28    |
| UNC5B-AS1 | FAM155B  | -0.400530475 | 2.40E-18    |
| UNC5B-AS1 | WFS1     | -0.435483672 | 9.63E-22    |
| UNC5B-AS1 | SELENBP1 | -0.505834303 | 6.76E-30    |
| UNC5B-AS1 | SNTA1    | -0.509521672 | 2.23E-30    |
| UNC5B-AS1 | FRAS1    | -0.333797854 | 6.93E-13    |
| UNC5B-AS1 | FBLN7    | -0.512672041 | 8.55E-31    |
| UNC5B-AS1 | AGPAT9   | -0.581868818 | 3.89E-41    |
| UNC5B-AS1 | GPR83    | -0.479215379 | 1.38E-26    |
| UNC5B-AS1 | PRTG     | -0.610320718 | 3.75E-46    |
| UNC5B-AS1 | EGR3     | -0.155450737 | 0.001084429 |
| UNC5B-AS1 | GRAMD2   | -0.336107122 | 4.70E-13    |
| UNC5B-AS1 | HYOU1    | -0.600128647 | 2.68E-44    |
| UNC5B-AS1 | FBLN5    | -0.320592997 | 5.97E-12    |
| UNC5B-AS1 | ITM2A    | -0.567758892 | 7.94E-39    |
| UNC5B-AS1 | SRF      | -0.374983848 | 4.19E-16    |
| UNC5B-AS1 | FGFR2    | -0.55511146  | 7.55E-37    |
| UNC5B-AS1 | MT1A     | -0.20968146  | 9.42E-06    |
| UNC5B-AS1 | MAMDC2   | -0.312016748 | 2.29E-11    |
| UNC5B-AS1 | FHL2     | -0.217759424 | 4.13E-06    |
| UNC5B-AS1 | FTCDNL1  | -0.629943612 | 6.41E-50    |
| UNC5B-AS1 | PKIA     | -0.446298979 | 7.08E-23    |
| UNC5B-AS1 | DNAJB4   | -0.54898958  | 6.38E-36    |
| UNC5B-AS1 | SLC25A33 | -0.484270494 | 3.41E-27    |
| UNC5B-AS1 | EYA2     | -0.403005694 | 1.42E-18    |
| UNC5B-AS1 | LPAR1    | -0.350582565 | 3.85E-14    |
| UNC5B-AS1 | STX11    | -0.392283007 | 1.34E-17    |
| UNC5B-AS1 | ARHGEF28 | -0.582923669 | 2.59E-41    |
| UNC5B-AS1 | OR2W3    | -0.52565336  | 1.48E-32    |
| UNC5B-AS1 | ALDH1B1  | -0.606117434 | 2.22E-45    |
| UNC5B-AS1 | CXCL12   | -0.264526753 | 1.83E-08    |
| UNC5B-AS1 | OLFM2    | -0.326331063 | 2.37E-12    |
| UNC5B-AS1 | TUB      | -0.611316989 | 2.45E-46    |
| UNC5B-AS1 | HTRA3    | -0.218649884 | 3.76E-06    |
| UNC5B-AS1 | CKB      | -0.259703118 | 3.37E-08    |
| UNC5B-AS1 | RGS2     | -0.084856144 | 0.07572153  |
| UNC5B-AS1 | SHANK2   | -0.64143024  | 2.97E-52    |
| UNC5B-AS1 | CNTFR    | -0.493000677 | 2.90E-28    |
| UNC5B-AS1 | CYTH3    | -0.664656677 | 2.73E-57    |
| UNC5B-AS1 | PLAC9    | -0.180898928 | 0.000138443 |
| UNC5B-AS1 | WWOX     | -0.597552156 | 7.71E-44    |
| UNC5B-AS1 | NPR3     | -0.402400187 | 1.62E-18    |

|           |          |              |             |
|-----------|----------|--------------|-------------|
| UNC5B-AS1 | SDC2     | -0.404706476 | 9.90E-19    |
| UNC5B-AS1 | KLF15    | -0.528108013 | 6.74E-33    |
| UNC5B-AS1 | TMEM164  | -0.583980364 | 1.72E-41    |
| UNC5B-AS1 | LONRF3   | -0.390889872 | 1.78E-17    |
| UNC5B-AS1 | GBP1     | -0.165137438 | 0.000512706 |
| UNC5B-AS1 | ARHGAP6  | -0.53617719  | 4.84E-34    |
| UNC5B-AS1 | TMEM119  | -0.153200332 | 0.001282897 |
| UNC5B-AS1 | SH3RF1   | -0.650475974 | 3.67E-54    |
| UNC5B-AS1 | CRELD2   | -0.333707644 | 7.03E-13    |
| UNC5B-AS1 | PCP4     | -0.04011157  | 0.401821809 |
| UNC5B-AS1 | GCSH     | -0.556865857 | 4.06E-37    |
| UNC5B-AS1 | IMPA2    | -0.528567994 | 5.81E-33    |
| UNC5B-AS1 | C1R      | 0.02653609   | 0.579233085 |
| UNC5B-AS1 | SUCNR1   | -0.390471875 | 1.93E-17    |
| UNC5B-AS1 | SFRP1    | -0.430782727 | 2.91E-21    |
| UNC5B-AS1 | UGT8     | -0.573084492 | 1.10E-39    |
| UNC5B-AS1 | TLE4     | -0.294194348 | 3.25E-10    |
| UNC5B-AS1 | ANTXR1   | -0.457268181 | 4.55E-24    |
| UNC5B-AS1 | GPX3     | -0.294685818 | 3.03E-10    |
| UNC5B-AS1 | DPY19L2  | -0.504792927 | 9.23E-30    |
| UNC5B-AS1 | FAM46C   | -0.505699131 | 7.04E-30    |
| UNC5B-AS1 | IL33     | -0.291162212 | 5.02E-10    |
| UNC5B-AS1 | PEG3     | -0.650691851 | 3.30E-54    |
| UNC5B-AS1 | FAHD2A   | -0.53247195  | 1.64E-33    |
| UNC5B-AS1 | PTGDS    | -0.085673983 | 0.07293301  |
| UNC5B-AS1 | CHCHD10  | -0.254614672 | 6.34E-08    |
| UNC5B-AS1 | CD36     | -0.628289353 | 1.36E-49    |
| UNC5B-AS1 | ANKRD37  | -0.26303192  | 2.22E-08    |
| UNC5B-AS1 | TSPAN33  | -0.438286963 | 4.94E-22    |
| UNC5B-AS1 | PRDM16   | -0.551716562 | 2.48E-36    |
| UNC5B-AS1 | UST      | -0.638390505 | 1.26E-51    |
| UNC5B-AS1 | NEXN     | -0.572484233 | 1.38E-39    |
| UNC5B-AS1 | NUPR1L   | -0.047685678 | 0.318840017 |
| UNC5B-AS1 | SLC24A3  | -0.529554479 | 4.22E-33    |
| UNC5B-AS1 | MARC1    | -0.530919956 | 2.71E-33    |
| UNC5B-AS1 | MYH11    | -0.332589675 | 8.47E-13    |
| UNC5B-AS1 | APOA1    | -0.316510691 | 1.14E-11    |
| UNC5B-AS1 | TMEM178B | -0.448610801 | 4.00E-23    |
| UNC5B-AS1 | CAPN6    | -0.218039    | 4.01E-06    |
| UNC5B-AS1 | PPM1L    | -0.654857641 | 4.13E-55    |
| UNC5B-AS1 | FZD8     | -0.481745773 | 6.87E-27    |
| UNC5B-AS1 | RCAN2    | -0.573342496 | 9.98E-40    |
| UNC5B-AS1 | COPZ2    | -0.443557672 | 1.38E-22    |
| UNC5B-AS1 | GAS1     | -0.334611721 | 6.04E-13    |
| UNC5B-AS1 | DACT1    | -0.422868295 | 1.80E-20    |
| UNC5B-AS1 | WBSCR17  | -0.503794527 | 1.24E-29    |
| UNC5B-AS1 | NCS1     | -0.356787562 | 1.26E-14    |
| UNC5B-AS1 | SPIRE2   | -0.37100174  | 8.99E-16    |
| UNC5B-AS1 | C15orf52 | -0.392039187 | 1.40E-17    |
| UNC5B-AS1 | SPAG5    | -0.420127981 | 3.35E-20    |
| UNC5B-AS1 | ARL4D    | -0.351615289 | 3.20E-14    |

|           |          |              |             |
|-----------|----------|--------------|-------------|
| UNC5B-AS1 | FAM189A2 | -0.429629866 | 3.81E-21    |
| UNC5B-AS1 | MAP1LC3A | -0.346560884 | 7.81E-14    |
| UNC5B-AS1 | KLF6     | -0.150664831 | 0.001546207 |
| UNC5B-AS1 | ADD3     | -0.585254497 | 1.05E-41    |
| UNC5B-AS1 | TSPAN7   | -0.507257934 | 4.41E-30    |
| UNC5B-AS1 | KLF9     | -0.522051236 | 4.64E-32    |
| UNC5B-AS1 | KCNQ1    | -0.603379863 | 6.99E-45    |
| UNC5B-AS1 | MAN1A1   | -0.248795332 | 1.28E-07    |
| UNC5B-AS1 | MLF1     | -0.359925734 | 7.13E-15    |
| UNC5B-AS1 | RARB     | -0.667557127 | 5.96E-58    |
| UNC5B-AS1 | CDC42EP2 | -0.329829362 | 1.34E-12    |
| UNC5B-AS1 | FAM3B    | -0.221791885 | 2.70E-06    |
| UNC5B-AS1 | GADD45B  | -0.176053167 | 0.000209562 |
| UNC5B-AS1 | TMEM47   | -0.477555163 | 2.17E-26    |
| UNC5B-AS1 | SDF2L1   | -0.208756951 | 1.03E-05    |
| UNC5B-AS1 | CCDC85A  | -0.446079981 | 7.47E-23    |
| UNC5B-AS1 | CRYBG3   | -0.445792901 | 8.02E-23    |
| UNC5B-AS1 | FBLN2    | -0.126953591 | 0.007740763 |
| UNC5B-AS1 | PEBP4    | -0.288514578 | 7.31E-10    |
| UNC5B-AS1 | CDADC1   | -0.625623787 | 4.56E-49    |
| UNC5B-AS1 | FAM63A   | -0.665624156 | 1.65E-57    |
| UNC5B-AS1 | GLUL     | -0.524660209 | 2.03E-32    |
| UNC5B-AS1 | FREM2    | -0.630146441 | 5.84E-50    |
| UNC5B-AS1 | ACKR3    | -0.489037252 | 8.95E-28    |
| UNC5B-AS1 | DENND6A  | -0.693907126 | 2.57E-64    |
| UNC5B-AS1 | CLDN8    | -0.291046248 | 5.11E-10    |
| UNC5B-AS1 | UTS2R    | -0.164863803 | 0.000523972 |
| UNC5B-AS1 | SCNN1B   | -0.370481335 | 9.93E-16    |
| UNC5B-AS1 | TTC30A   | -0.655995325 | 2.33E-55    |
| UNC5B-AS1 | CORO2B   | -0.502724642 | 1.71E-29    |
| UNC5B-AS1 | TC2N     | -0.401723618 | 1.87E-18    |
| UNC5B-AS1 | ALDH2    | -0.49149928  | 4.45E-28    |
| UNC5B-AS1 | GPR183   | -0.065198783 | 0.17268637  |
| UNC5B-AS1 | C4orf47  | -0.310071579 | 3.08E-11    |
| UNC5B-AS1 | SLC25A42 | -0.579363104 | 1.02E-40    |
| UNC5B-AS1 | LGMN     | -0.594649578 | 2.50E-43    |
| UNC5B-AS1 | ACSF2    | -0.467442664 | 3.26E-25    |
| UNC5B-AS1 | KIAA1467 | -0.70451464  | 4.46E-67    |
| UNC5B-AS1 | PRKG1    | -0.612738208 | 1.33E-46    |
| UNC5B-AS1 | GNAI1    | -0.579133468 | 1.11E-40    |
| UNC5B-AS1 | ABCC4    | -0.447480776 | 5.29E-23    |
| UNC5B-AS1 | PRPS1    | -0.691613601 | 9.81E-64    |
| UNC5B-AS1 | TSPAN5   | -0.311859592 | 2.34E-11    |
| UNC5B-AS1 | CR2      | -0.189734768 | 6.32E-05    |
| UNC5B-AS1 | CCDC170  | -0.519398436 | 1.07E-31    |
| UNC5B-AS1 | RRAD     | 0.096225188  | 0.043897167 |
| UNC5B-AS1 | SCGB2A1  | -0.318553647 | 8.24E-12    |
| UNC5B-AS1 | SESN3    | -0.335493104 | 5.21E-13    |
| UNC5B-AS1 | SGK223   | -0.269091959 | 1.02E-08    |
| UNC5B-AS1 | NDRG2    | -0.64596339  | 3.35E-53    |
| UNC5B-AS1 | C3orf52  | -0.303569856 | 8.23E-11    |

|           |          |             |             |
|-----------|----------|-------------|-------------|
| UNC5B-AS1 | FLRT3    | 0.225450602 | 1.83E-06    |
| UNC5B-AS1 | MST1R    | 0.629316545 | 8.54E-50    |
| UNC5B-AS1 | SDC1     | 0.343386828 | 1.36E-13    |
| UNC5B-AS1 | ST8SIA4  | 0.457015851 | 4.85E-24    |
| UNC5B-AS1 | UBTD1    | 0.589643256 | 1.86E-42    |
| UNC5B-AS1 | EPHA2    | 0.457315414 | 4.49E-24    |
| UNC5B-AS1 | TMEM130  | 0.390133449 | 2.07E-17    |
| UNC5B-AS1 | SPINK2   | 0.501894179 | 2.18E-29    |
| UNC5B-AS1 | MMP16    | 0.48094382  | 8.57E-27    |
| UNC5B-AS1 | SIGLEC15 | 0.514115103 | 5.49E-31    |
| UNC5B-AS1 | RIN1     | 0.758319983 | 3.11E-83    |
| UNC5B-AS1 | IL1RN    | 0.460331745 | 2.08E-24    |
| UNC5B-AS1 | FCER1G   | 0.388269127 | 3.03E-17    |
| UNC5B-AS1 | CD276    | 0.618706194 | 9.93E-48    |
| UNC5B-AS1 | CTSB     | 0.293882588 | 3.40E-10    |
| UNC5B-AS1 | FAM171A2 | 0.290593075 | 5.45E-10    |
| UNC5B-AS1 | ASPHD1   | 0.608174705 | 9.34E-46    |
| UNC5B-AS1 | C15orf48 | 0.432986184 | 1.74E-21    |
| UNC5B-AS1 | DYSF     | 0.142105603 | 0.002844028 |
| UNC5B-AS1 | PDZRN4   | 0.265135239 | 1.69E-08    |
| UNC5B-AS1 | EFHD2    | 0.501982828 | 2.12E-29    |
| UNC5B-AS1 | ASF1B    | 0.41116196  | 2.45E-19    |
| UNC5B-AS1 | AQP1     | 0.169745904 | 0.000353739 |
| UNC5B-AS1 | ARRDC2   | 0.560790379 | 1.00E-37    |
| UNC5B-AS1 | PRSS1    | 0.491089898 | 5.00E-28    |
| UNC5B-AS1 | MAPK13   | 0.460109485 | 2.20E-24    |
| UNC5B-AS1 | CST5     | 0.637528168 | 1.89E-51    |
| UNC5B-AS1 | AHR      | 0.387126762 | 3.81E-17    |
| UNC5B-AS1 | BAX      | 0.738086616 | 1.09E-76    |
| UNC5B-AS1 | C1orf115 | 0.178125565 | 0.000175746 |
| UNC5B-AS1 | PLK3     | 0.593008793 | 4.85E-43    |
| UNC5B-AS1 | JAG2     | 0.431003853 | 2.76E-21    |
| UNC5B-AS1 | RAD23B   | 0.327598104 | 1.93E-12    |
| UNC5B-AS1 | CA12     | -0.02834311 | 0.553663142 |
| UNC5B-AS1 | ADTRP    | 0.285430163 | 1.13E-09    |
| UNC5B-AS1 | UCP2     | 0.409716912 | 3.36E-19    |
| UNC5B-AS1 | IGFBP2   | 0.437625997 | 5.79E-22    |
| UNC5B-AS1 | LOXL2    | 0.278743909 | 2.82E-09    |
| UNC5B-AS1 | GPX1     | 0.682001791 | 2.34E-61    |
| UNC5B-AS1 | P3H3     | 0.695355578 | 1.10E-64    |
| UNC5B-AS1 | C2orf81  | 0.551592595 | 2.59E-36    |
| UNC5B-AS1 | CDT1     | 0.520099684 | 8.58E-32    |
| UNC5B-AS1 | SNX25    | 0.256723948 | 4.89E-08    |
| UNC5B-AS1 | MTHFD1L  | 0.535339635 | 6.39E-34    |
| UNC5B-AS1 | CDC42BPG | 0.525956132 | 1.34E-32    |
| UNC5B-AS1 | MSN      | 0.253583366 | 7.19E-08    |
| UNC5B-AS1 | SIGLEC6  | 0.388906678 | 2.66E-17    |
| UNC5B-AS1 | F2R      | 0.154591765 | 0.001156581 |
| UNC5B-AS1 | TMEM184A | 0.655140608 | 3.58E-55    |
| UNC5B-AS1 | CKS2     | 0.426046181 | 8.72E-21    |
| UNC5B-AS1 | TAX1BP3  | 0.74979281  | 2.12E-80    |

|           |          |             |             |
|-----------|----------|-------------|-------------|
| UNC5B-AS1 | PMEP1    | 0.540028807 | 1.34E-34    |
| UNC5B-AS1 | CXCL16   | 0.582557443 | 2.98E-41    |
| UNC5B-AS1 | FAXC     | 0.660803925 | 2.01E-56    |
| UNC5B-AS1 | VTCN1    | 0.551142924 | 3.03E-36    |
| UNC5B-AS1 | SH2D4A   | 0.367187709 | 1.85E-15    |
| UNC5B-AS1 | RNF24    | 0.35763462  | 1.08E-14    |
| UNC5B-AS1 | LY6G6C   | 0.535457338 | 6.14E-34    |
| UNC5B-AS1 | NID1     | 0.24642791  | 1.70E-07    |
| UNC5B-AS1 | STAC     | 0.610943813 | 2.87E-46    |
| UNC5B-AS1 | RAB34    | 0.71426148  | 1.00E-69    |
| UNC5B-AS1 | HES4     | 0.635775717 | 4.31E-51    |
| UNC5B-AS1 | EPHA10   | 0.562693281 | 5.04E-38    |
| UNC5B-AS1 | ENTPD2   | 0.507364029 | 4.28E-30    |
| UNC5B-AS1 | DDB2     | 0.676770939 | 4.22E-60    |
| UNC5B-AS1 | NKAIN4   | 0.482155544 | 6.14E-27    |
| UNC5B-AS1 | TRIM29   | 0.523751593 | 2.71E-32    |
| UNC5B-AS1 | ADCY8    | 0.581967329 | 3.75E-41    |
| UNC5B-AS1 | SFTA2    | 0.454424467 | 9.36E-24    |
| UNC5B-AS1 | NRIP1    | 0.359997787 | 7.04E-15    |
| UNC5B-AS1 | VWA1     | 0.348601227 | 5.46E-14    |
| UNC5B-AS1 | APLNR    | 0.138786304 | 0.00357152  |
| UNC5B-AS1 | REN      | 0.535934176 | 5.25E-34    |
| UNC5B-AS1 | EDIL3    | 0.209839602 | 9.27E-06    |
| UNC5B-AS1 | AGRN     | 0.470522823 | 1.44E-25    |
| UNC5B-AS1 | TREM1    | 0.558988892 | 1.91E-37    |
| UNC5B-AS1 | SRL      | 0.333959975 | 6.74E-13    |
| UNC5B-AS1 | RASGRF1  | 0.514798338 | 4.45E-31    |
| UNC5B-AS1 | RMI2     | 0.536674617 | 4.11E-34    |
| UNC5B-AS1 | SAMD1    | 0.681128068 | 3.81E-61    |
| UNC5B-AS1 | MGAT4B   | 0.592275064 | 6.51E-43    |
| UNC5B-AS1 | NXN      | 0.650774685 | 3.16E-54    |
| UNC5B-AS1 | SH3BGRL3 | 0.669513502 | 2.12E-58    |
| UNC5B-AS1 | CA11     | 0.42919655  | 4.21E-21    |
| UNC5B-AS1 | PLD3     | 0.467565212 | 3.15E-25    |
| UNC5B-AS1 | LURAP1L  | 0.418495281 | 4.84E-20    |
| UNC5B-AS1 | CARNS1   | 0.299264498 | 1.56E-10    |
| UNC5B-AS1 | PDLIM7   | 0.672189138 | 5.06E-59    |
| UNC5B-AS1 | BCL2L1   | 0.717028177 | 1.70E-70    |
| UNC5B-AS1 | GGT6     | 0.325480601 | 2.72E-12    |
| UNC5B-AS1 | DPYSL3   | 0.450804755 | 2.32E-23    |
| UNC5B-AS1 | FYN      | 0.542185316 | 6.51E-35    |
| UNC5B-AS1 | TK1      | 0.434875044 | 1.11E-21    |
| UNC5B-AS1 | AK1      | 0.412008451 | 2.04E-19    |
| UNC5B-AS1 | HIGD1B   | 0.148186208 | 0.001850715 |
| UNC5B-AS1 | TMEM59L  | 0.579836134 | 8.51E-41    |
| UNC5B-AS1 | MEGF9    | 0.228274176 | 1.34E-06    |
| UNC5B-AS1 | ZFP36L1  | 0.395945554 | 6.27E-18    |
| UNC5B-AS1 | ADRA1B   | 0.325783    | 2.59E-12    |
| UNC5B-AS1 | EPHA4    | 0.454862321 | 8.38E-24    |
| UNC5B-AS1 | TCERG1L  | 0.22595739  | 1.73E-06    |
| UNC5B-AS1 | NGFR     | 0.287351221 | 8.61E-10    |

|           |          |             |             |
|-----------|----------|-------------|-------------|
| UNC5B-AS1 | EBI3     | 0.559829    | 1.41E-37    |
| UNC5B-AS1 | S100A10  | 0.66426492  | 3.35E-57    |
| UNC5B-AS1 | S100B    | 0.485358535 | 2.52E-27    |
| UNC5B-AS1 | CD44     | 0.170455379 | 0.000333809 |
| UNC5B-AS1 | BHLHE41  | 0.328542463 | 1.65E-12    |
| UNC5B-AS1 | FBX02    | 0.627699873 | 1.78E-49    |
| UNC5B-AS1 | SLC30A2  | 0.351569192 | 3.23E-14    |
| UNC5B-AS1 | FRMD5    | 0.506603634 | 5.37E-30    |
| UNC5B-AS1 | SAMD11   | 0.394767871 | 8.01E-18    |
| UNC5B-AS1 | SIPA1L2  | 0.392572215 | 1.26E-17    |
| UNC5B-AS1 | S100A16  | 0.72400293  | 1.75E-72    |
| UNC5B-AS1 | PPL      | 0.476797179 | 2.67E-26    |
| UNC5B-AS1 | ARHGDIB  | 0.331480784 | 1.02E-12    |
| UNC5B-AS1 | CDC42EP3 | 0.579762237 | 8.75E-41    |
| UNC5B-AS1 | RUNX2    | 0.465829254 | 4.98E-25    |
| UNC5B-AS1 | LAMC2    | 0.479469979 | 1.29E-26    |
| UNC5B-AS1 | BRINP1   | 0.50642974  | 5.66E-30    |
| UNC5B-AS1 | GPRC5B   | 0.248859018 | 1.27E-07    |
| UNC5B-AS1 | AQP5     | 0.349792526 | 4.43E-14    |
| UNC5B-AS1 | PLAG1    | 0.360468123 | 6.46E-15    |
| UNC5B-AS1 | PTPRU    | 0.584946424 | 1.18E-41    |
| UNC5B-AS1 | ANGPTL4  | 0.561013775 | 9.23E-38    |
| UNC5B-AS1 | PALM3    | 0.383136001 | 8.47E-17    |
| UNC5B-AS1 | ACP5     | 0.475712542 | 3.58E-26    |
| UNC5B-AS1 | DLG4     | 0.342276234 | 1.64E-13    |
| UNC5B-AS1 | ETNK2    | 0.462288829 | 1.25E-24    |
| UNC5B-AS1 | CD109    | 0.449665226 | 3.08E-23    |
| UNC5B-AS1 | SNX22    | 0.408988289 | 3.94E-19    |
| UNC5B-AS1 | TMEM98   | 0.506656681 | 5.29E-30    |
| UNC5B-AS1 | CTHRC1   | 0.471243361 | 1.19E-25    |
| UNC5B-AS1 | S100A2   | 0.631716732 | 2.84E-50    |
| UNC5B-AS1 | C11orf80 | 0.672527281 | 4.22E-59    |
| UNC5B-AS1 | SREBF1   | 0.584584595 | 1.36E-41    |
| UNC5B-AS1 | PRSS22   | 0.67688597  | 3.96E-60    |
| UNC5B-AS1 | CMTM3    | 0.672498062 | 4.29E-59    |
| UNC5B-AS1 | RDH5     | 0.447990968 | 4.67E-23    |
| UNC5B-AS1 | MYH10    | 0.373989846 | 5.07E-16    |
| UNC5B-AS1 | EVPL     | 0.510248876 | 1.79E-30    |
| UNC5B-AS1 | SCD      | 0.368194335 | 1.53E-15    |
| UNC5B-AS1 | CD151    | 0.643329596 | 1.20E-52    |
| UNC5B-AS1 | S100A4   | 0.521828976 | 4.98E-32    |
| UNC5B-AS1 | BNIPL    | 0.4271433   | 6.77E-21    |
| UNC5B-AS1 | MAP3K6   | 0.640742608 | 4.13E-52    |
| UNC5B-AS1 | MANEAL   | 0.422650999 | 1.89E-20    |
| UNC5B-AS1 | CD207    | 0.460869923 | 1.81E-24    |
| UNC5B-AS1 | CD1A     | 0.494259952 | 2.02E-28    |
| UNC5B-AS1 | C3       | 0.46967307  | 1.81E-25    |
| UNC5B-AS1 | NT5E     | 0.464990848 | 6.20E-25    |
| UNC5B-AS1 | CACNG4   | 0.642525545 | 1.76E-52    |
| UNC5B-AS1 | FHOD1    | 0.522305552 | 4.28E-32    |
| UNC5B-AS1 | LEMD1    | 0.589915018 | 1.67E-42    |

|           |          |             |             |
|-----------|----------|-------------|-------------|
| UNC5B-AS1 | ATP11A   | 0.302253313 | 1.00E-10    |
| UNC5B-AS1 | PPAP2C   | 0.59034422  | 1.41E-42    |
| UNC5B-AS1 | DRAM1    | 0.580880915 | 5.70E-41    |
| UNC5B-AS1 | CDA      | 0.373584188 | 5.48E-16    |
| UNC5B-AS1 | CCND2    | 0.386979108 | 3.93E-17    |
| UNC5B-AS1 | LCN6     | 0.336631864 | 4.30E-13    |
| UNC5B-AS1 | CDH4     | 0.476181459 | 3.15E-26    |
| UNC5B-AS1 | MMP11    | 0.572712025 | 1.26E-39    |
| UNC5B-AS1 | B3GAT1   | 0.354299578 | 1.98E-14    |
| UNC5B-AS1 | SPP1     | 0.241328542 | 3.09E-07    |
| UNC5B-AS1 | HLA-DQB1 | 0.384996068 | 5.85E-17    |
| UNC5B-AS1 | SDC3     | 0.579877693 | 8.38E-41    |
| UNC5B-AS1 | CX3CL1   | 0.44738078  | 5.42E-23    |
| UNC5B-AS1 | SDK1     | 0.503376956 | 1.41E-29    |
| UNC5B-AS1 | DOCK9    | 0.276509531 | 3.81E-09    |
| UNC5B-AS1 | CSF2     | 0.672047044 | 5.46E-59    |
| UNC5B-AS1 | GRHL3    | 0.63586394  | 4.14E-51    |
| UNC5B-AS1 | TMEM92   | 0.66973727  | 1.88E-58    |
| UNC5B-AS1 | BASP1    | 0.608082936 | 9.71E-46    |
| UNC5B-AS1 | HRH1     | 0.590951146 | 1.10E-42    |
| UNC5B-AS1 | ESM1     | 0.098466658 | 0.039185149 |
| UNC5B-AS1 | B4GALNT3 | 0.477279855 | 2.34E-26    |
| UNC5B-AS1 | LMO3     | 0.267440536 | 1.26E-08    |
| UNC5B-AS1 | C9orf16  | 0.739276072 | 4.65E-77    |
| UNC5B-AS1 | SEMA3F   | 0.424214057 | 1.33E-20    |
| UNC5B-AS1 | PLA2G12B | 0.237384022 | 4.86E-07    |
| UNC5B-AS1 | KLK6     | 0.506823408 | 5.03E-30    |
| UNC5B-AS1 | ST3GAL5  | 0.461226745 | 1.65E-24    |
| UNC5B-AS1 | FAM132B  | 0.174823855 | 0.000232404 |
| UNC5B-AS1 | CDKN1A   | 0.473799428 | 6.00E-26    |
| UNC5B-AS1 | E2F1     | 0.491311344 | 4.69E-28    |
| UNC5B-AS1 | B3GNT8   | 0.583870439 | 1.79E-41    |
| UNC5B-AS1 | MTMR11   | 0.621518279 | 2.87E-48    |
| UNC5B-AS1 | MYO1G    | 0.513881354 | 5.90E-31    |
| UNC5B-AS1 | TMSB10   | 0.728541896 | 8.23E-74    |
| UNC5B-AS1 | UNC5CL   | 0.640897921 | 3.83E-52    |
| UNC5B-AS1 | ABR      | 0.524789423 | 1.95E-32    |
| UNC5B-AS1 | PLP2     | 0.687717305 | 9.26E-63    |
| UNC5B-AS1 | SRCIN1   | 0.427789657 | 5.83E-21    |
| UNC5B-AS1 | PDE9A    | 0.631423552 | 3.25E-50    |
| UNC5B-AS1 | TREM2    | 0.420125711 | 3.35E-20    |
| UNC5B-AS1 | KDELR3   | 0.472448561 | 8.62E-26    |
| UNC5B-AS1 | PC       | 0.426441768 | 7.96E-21    |
| UNC5B-AS1 | C2CD4A   | 0.475762327 | 3.53E-26    |
| UNC5B-AS1 | PELI1    | 0.508825246 | 2.75E-30    |
| UNC5B-AS1 | SSX1     | 0.35297183  | 2.51E-14    |
| UNC5B-AS1 | MROH6    | 0.637049708 | 2.37E-51    |
| UNC5B-AS1 | ESPN     | 0.563351978 | 3.97E-38    |
| UNC5B-AS1 | BMP1     | 0.5143602   | 5.10E-31    |
| UNC5B-AS1 | TM4SF4   | 0.542226975 | 6.42E-35    |
| UNC5B-AS1 | CORO2A   | 0.42222279  | 2.09E-20    |

|           |          |             |          |
|-----------|----------|-------------|----------|
| UNC5B-AS1 | CD164L2  | 0.534236082 | 9.18E-34 |
| UNC5B-AS1 | CTSS     | 0.337030489 | 4.02E-13 |
| UNC5B-AS1 | CLU      | 0.582879983 | 2.63E-41 |
| UNC5B-AS1 | TMSB4X   | 0.614168931 | 7.18E-47 |
| UNC5B-AS1 | WNT10A   | 0.584050736 | 1.67E-41 |
| UNC5B-AS1 | NAPSA    | 0.589783675 | 1.76E-42 |
| UNC5B-AS1 | PLEKHA4  | 0.482548436 | 5.50E-27 |
| UNC5B-AS1 | SFTPA1   | 0.268002228 | 1.17E-08 |
| UNC5B-AS1 | C1orf116 | 0.424025837 | 1.38E-20 |
| UNC5B-AS1 | TM4SF1   | 0.521447005 | 5.62E-32 |
| UNC5B-AS1 | SEL1L3   | 0.428285807 | 5.20E-21 |
| UNC5B-AS1 | VASN     | 0.731622197 | 9.99E-75 |
| UNC5B-AS1 | NPTXR    | 0.502754995 | 1.69E-29 |
| UNC5B-AS1 | PDE4C    | 0.562638957 | 5.14E-38 |
| UNC5B-AS1 | CDC42EP1 | 0.667333306 | 6.71E-58 |
| UNC5B-AS1 | ENDOD1   | 0.446209054 | 7.24E-23 |
| UNC5B-AS1 | RYR1     | 0.607349774 | 1.32E-45 |
| UNC5B-AS1 | IL1RAP   | 0.479242329 | 1.37E-26 |
| UNC5B-AS1 | SLC35F2  | 0.49666533  | 1.01E-28 |
| UNC5B-AS1 | ISYNA1   | 0.646980087 | 2.04E-53 |
| UNC5B-AS1 | HLA-G    | 0.514509697 | 4.87E-31 |
| UNC5B-AS1 | CDKN2B   | 0.528944716 | 5.14E-33 |
| UNC5B-AS1 | ALDH1A3  | 0.532289971 | 1.74E-33 |
| UNC5B-AS1 | CLIP3    | 0.605989687 | 2.35E-45 |
| UNC5B-AS1 | ULBP2    | 0.520889439 | 6.69E-32 |
| UNC5B-AS1 | ETHE1    | 0.666618158 | 9.78E-58 |
| UNC5B-AS1 | XPR1     | 0.506842348 | 5.00E-30 |
| UNC5B-AS1 | SPTBN2   | 0.506938372 | 4.86E-30 |
| UNC5B-AS1 | IVL      | 0.629648751 | 7.34E-50 |
| UNC5B-AS1 | MARCO    | 0.454085899 | 1.02E-23 |
| UNC5B-AS1 | PLXND1   | 0.350326263 | 4.03E-14 |
| UNC5B-AS1 | EMILIN2  | 0.5083186   | 3.21E-30 |
| UNC5B-AS1 | PLAUR    | 0.617439862 | 1.73E-47 |
| UNC5B-AS1 | CDC42EP5 | 0.775589497 | 2.37E-89 |
| UNC5B-AS1 | TRPC5    | 0.235285027 | 6.17E-07 |
| UNC5B-AS1 | TMEM100  | 0.488329195 | 1.09E-27 |
| UNC5B-AS1 | QSOX1    | 0.60765813  | 1.16E-45 |
| UNC5B-AS1 | ARHGAP23 | 0.501712058 | 2.30E-29 |
| UNC5B-AS1 | MDFI     | 0.546708395 | 1.40E-35 |
| UNC5B-AS1 | FSTL3    | 0.666814037 | 8.82E-58 |
| UNC5B-AS1 | INF2     | 0.486826986 | 1.67E-27 |
| UNC5B-AS1 | TGFBR1   | 0.366715104 | 2.02E-15 |
| UNC5B-AS1 | TGFBI    | 0.431785098 | 2.30E-21 |
| UNC5B-AS1 | ERBB3    | 0.489596236 | 7.64E-28 |
| UNC5B-AS1 | CCL18    | 0.391800048 | 1.47E-17 |
| UNC5B-AS1 | CCL17    | 0.563317744 | 4.02E-38 |
| UNC5B-AS1 | C16orf45 | 0.461096254 | 1.70E-24 |
| UNC5B-AS1 | PRDM1    | 0.257575545 | 4.40E-08 |
| UNC5B-AS1 | TRIM47   | 0.689722756 | 2.93E-63 |
| UNC5B-AS1 | CNFN     | 0.659712054 | 3.52E-56 |
| UNC5B-AS1 | ARMCX3   | 0.280266401 | 2.29E-09 |



|           |           |             |          |
|-----------|-----------|-------------|----------|
| UNC5B-AS1 | RAMP1     | 0.510602479 | 1.61E-30 |
| UNC5B-AS1 | GABRD     | 0.228419986 | 1.32E-06 |
| UNC5B-AS1 | COL13A1   | 0.367541738 | 1.73E-15 |
| UNC5B-AS1 | S100A5    | 0.557048403 | 3.80E-37 |
| UNC5B-AS1 | MISP      | 0.607804365 | 1.09E-45 |
| UNC5B-AS1 | HES6      | 0.394241368 | 8.93E-18 |
| UNC5B-AS1 | PSD3      | 0.295929597 | 2.53E-10 |
| UNC5B-AS1 | DOK7      | 0.620520022 | 4.46E-48 |
| UNC5B-AS1 | ZMAT3     | 0.459964243 | 2.28E-24 |
| UNC5B-AS1 | MFAP2     | 0.522908081 | 3.54E-32 |
| UNC5B-AS1 | TMEM79    | 0.576816682 | 2.69E-40 |
| UNC5B-AS1 | SLC1A5    | 0.559934527 | 1.36E-37 |
| UNC5B-AS1 | BBC3      | 0.782335324 | 6.84E-92 |
| UNC5B-AS1 | HLA-DQB2  | 0.479346438 | 1.33E-26 |
| UNC5B-AS1 | C1QL1     | 0.519260002 | 1.12E-31 |
| UNC5B-AS1 | TMEM215   | 0.282682292 | 1.65E-09 |
| UNC5B-AS1 | PNP       | 0.431827933 | 2.28E-21 |
| UNC5B-AS1 | ARNTL     | 0.489711409 | 7.40E-28 |
| UNC5B-AS1 | CLDN2     | 0.393793315 | 9.79E-18 |
| UNC5B-AS1 | MVP       | 0.700588558 | 4.85E-66 |
| UNC5B-AS1 | LGALS1    | 0.720493285 | 1.78E-71 |
| UNC5B-AS1 | BIRC7     | 0.506292942 | 5.90E-30 |
| UNC5B-AS1 | COL8A1    | 0.48627864  | 1.95E-27 |
| UNC5B-AS1 | PERP      | 0.584854513 | 1.22E-41 |
| UNC5B-AS1 | GJA4      | 0.374376213 | 4.71E-16 |
| UNC5B-AS1 | IGFL2     | 0.661615519 | 1.32E-56 |
| UNC5B-AS1 | DAPK2     | 0.411380107 | 2.34E-19 |
| UNC5B-AS1 | MAMLD1    | 0.525340607 | 1.64E-32 |
| UNC5B-AS1 | ETV5      | 0.297058913 | 2.15E-10 |
| UNC5B-AS1 | RUNX1     | 0.58865365  | 2.75E-42 |
| UNC5B-AS1 | LONRF2    | 0.250674547 | 1.02E-07 |
| UNC5B-AS1 | SPOCK1    | 0.233415812 | 7.61E-07 |
| UNC5B-AS1 | XKRX      | 0.413114505 | 1.60E-19 |
| UNC5B-AS1 | TGFB1     | 0.504810798 | 9.18E-30 |
| UNC5B-AS1 | ERP27     | 0.340388225 | 2.27E-13 |
| UNC5B-AS1 | TNFRSF10C | 0.493570402 | 2.46E-28 |
| UNC5B-AS1 | PALM      | 0.622912123 | 1.54E-48 |
| UNC5B-AS1 | TSC22D1   | 0.406244996 | 7.12E-19 |
| UNC5B-AS1 | TGM2      | 0.484908908 | 2.86E-27 |
| UNC5B-AS1 | UBE2QL1   | 0.315044995 | 1.43E-11 |
| UNC5B-AS1 | ECE1      | 0.555201244 | 7.31E-37 |
| UNC5B-AS1 | COL8A2    | 0.597485917 | 7.93E-44 |
| UNC5B-AS1 | HIST3H2A  | 0.530349624 | 3.27E-33 |
| UNC5B-AS1 | TNFRSF21  | 0.515217044 | 3.91E-31 |
| UNC5B-AS1 | SOX4      | 0.568254049 | 6.62E-39 |
| UNC5B-AS1 | ELF3      | 0.617613189 | 1.60E-47 |
| UNC5B-AS1 | TPD52L1   | 0.445814176 | 7.97E-23 |
| UNC5B-AS1 | INHBB     | 0.477026673 | 2.50E-26 |
| UNC5B-AS1 | HPN       | 0.511177633 | 1.35E-30 |
| UNC5B-AS1 | MMP7      | 0.484279115 | 3.40E-27 |
| UNC5B-AS1 | RAB27A    | 0.396008246 | 6.19E-18 |

|           |            |             |          |
|-----------|------------|-------------|----------|
| UNC5B-AS1 | IGF2BP2    | 0.449900394 | 2.91E-23 |
| UNC5B-AS1 | ITGB4      | 0.665702876 | 1.58E-57 |
| UNC5B-AS1 | PPP1R1B    | 0.555801503 | 5.91E-37 |
| UNC5B-AS1 | NPDC1      | 0.619820334 | 6.08E-48 |
| UNC5B-AS1 | CCL13      | 0.60900276  | 6.57E-46 |
| UNC5B-AS1 | SPINT1     | 0.662476765 | 8.48E-57 |
| UNC5B-AS1 | HEY2       | 0.36421634  | 3.23E-15 |
| UNC5B-AS1 | CST2       | 0.613595373 | 9.20E-47 |
| UNC5B-AS1 | ADM        | 0.319276029 | 7.35E-12 |
| UNC5B-AS1 | VSTM2L     | 0.541505627 | 8.18E-35 |
| UNC5B-AS1 | FAM84A     | 0.623433521 | 1.22E-48 |
| UNC5B-AS1 | P4HA2      | 0.452126545 | 1.67E-23 |
| UNC5B-AS1 | LPL        | 0.404538965 | 1.03E-18 |
| UNC5B-AS1 | TMEM173    | 0.582015763 | 3.68E-41 |
| UNC5B-AS1 | DHRS3      | 0.564526257 | 2.59E-38 |
| UNC5B-AS1 | SCN1B      | 0.690383297 | 2.00E-63 |
| UNC5B-AS1 | GLT1D1     | 0.283187417 | 1.54E-09 |
| UNC5B-AS1 | PHYHIP     | 0.595172252 | 2.03E-43 |
| UNC5B-AS1 | BHLHE40    | 0.446529608 | 6.69E-23 |
| UNC5B-AS1 | BID        | 0.622030882 | 2.28E-48 |
| UNC5B-AS1 | POSTN      | 0.315694756 | 1.29E-11 |
| UNC5B-AS1 | ITGA3      | 0.636359239 | 3.28E-51 |
| UNC5B-AS1 | RSPO4      | 0.580934813 | 5.58E-41 |
| UNC5B-AS1 | ADAMTS9    | 0.23499816  | 6.37E-07 |
| UNC5B-AS1 | ABTB2      | 0.531472416 | 2.27E-33 |
| UNC5B-AS1 | KCNQ3      | 0.554095331 | 1.08E-36 |
| UNC5B-AS1 | ANXA1      | 0.475840338 | 3.46E-26 |
| UNC5B-AS1 | S100A11    | 0.779264101 | 1.01E-90 |
| UNC5B-AS1 | CEACAM6    | 0.558689296 | 2.12E-37 |
| UNC5B-AS1 | IER5L      | 0.733463115 | 2.79E-75 |
| UNC5B-AS1 | KRT80      | 0.526736295 | 1.05E-32 |
| UNC5B-AS1 | CDH6       | 0.619625731 | 6.62E-48 |
| UNC5B-AS1 | UNC5B      | 0.495553584 | 1.39E-28 |
| UNC5B-AS1 | PLEKHN1    | 0.727811287 | 1.35E-73 |
| UNC5B-AS1 | SYTL1      | 0.765944355 | 7.20E-86 |
| UNC5B-AS1 | TMEM163    | 0.609987823 | 4.32E-46 |
| UNC5B-AS1 | C4orf48    | 0.669236776 | 2.45E-58 |
| UNC5B-AS1 | B3GNT7     | 0.436714544 | 7.19E-22 |
| UNC5B-AS1 | BAIAP3     | 0.486730395 | 1.72E-27 |
| UNC5B-AS1 | PHLDA2     | 0.722694614 | 4.16E-72 |
| UNC5B-AS1 | GAP43      | 0.589270952 | 2.15E-42 |
| UNC5B-AS1 | S100A1     | 0.494730922 | 1.76E-28 |
| UNC5B-AS1 | PTPRE      | 0.524019525 | 2.49E-32 |
| UNC5B-AS1 | CCND1      | 0.512265391 | 9.68E-31 |
| UNC5B-AS1 | ST6GALNAC5 | 0.611036016 | 2.76E-46 |
| UNC5B-AS1 | KRT17      | 0.473365828 | 6.74E-26 |
| UNC5B-AS1 | HPCAL4     | 0.419159225 | 4.17E-20 |
| UNC5B-AS1 | GABBR2     | 0.279721884 | 2.47E-09 |
| UNC5B-AS1 | DIRAS3     | 0.473252925 | 6.94E-26 |
| UNC5B-AS1 | SERINC2    | 0.517424189 | 1.98E-31 |
| UNC5B-AS1 | PTCHD4     | 0.606124008 | 2.22E-45 |

|           |         |             |             |
|-----------|---------|-------------|-------------|
| UNC5B-AS1 | EPS8    | 0.259806944 | 3.33E-08    |
| UNC5B-AS1 | LY6E    | 0.658401327 | 6.87E-56    |
| UNC5B-AS1 | UPP1    | 0.722781845 | 3.93E-72    |
| UNC5B-AS1 | AHNAK2  | 0.564477039 | 2.64E-38    |
| UNC5B-AS1 | PLXNC1  | 0.367054949 | 1.90E-15    |
| UNC5B-AS1 | TNC     | 0.494218886 | 2.04E-28    |
| UNC5B-AS1 | DUSP4   | 0.42807078  | 5.47E-21    |
| UNC5B-AS1 | NRCAM   | 0.330702518 | 1.16E-12    |
| UNC5B-AS1 | NRP2    | 0.433109158 | 1.69E-21    |
| UNC5B-AS1 | CTSC    | 0.554642543 | 8.90E-37    |
| UNC5B-AS1 | AMIGO2  | 0.497693781 | 7.47E-29    |
| UNC5B-AS1 | NAB2    | 0.500374808 | 3.41E-29    |
| UNC5B-AS1 | TBC1D2  | 0.606762422 | 1.70E-45    |
| UNC5B-AS1 | PHLDA3  | 0.815569583 | 7.05E-106   |
| UNC5B-AS1 | PTP4A3  | 0.629820355 | 6.78E-50    |
| UNC5B-AS1 | CRABP2  | 0.456575727 | 5.43E-24    |
| UNC5B-AS1 | GOS2    | 0.521349988 | 5.79E-32    |
| UNC5B-AS1 | S100A6  | 0.773754111 | 1.13E-88    |
| UNC5B-AS1 | FOXQ1   | 0.521105033 | 6.25E-32    |
| UNC5B-AS1 | LRG1    | 0.514798054 | 4.45E-31    |
| UNC5B-AS1 | LAMP5   | 0.541534704 | 8.10E-35    |
| UNC5B-AS1 | ALDH3B1 | 0.629183359 | 9.08E-50    |
| UNC5B-AS1 | CDH2    | 0.076998306 | 0.10716087  |
| UNC5B-AS1 | SCG5    | 0.406023161 | 7.46E-19    |
| UNC5B-AS1 | ZCCHC16 | 0.252320069 | 8.39E-08    |
| UNC5B-AS1 | GRB7    | 0.619053414 | 8.52E-48    |
| UNC5B-AS1 | TIAM1   | 0.484982096 | 2.80E-27    |
| UNC5B-AS1 | FXYD5   | 0.57813209  | 1.63E-40    |
| UNC5B-AS1 | CLDN9   | 0.619223762 | 7.91E-48    |
| UNC5B-AS1 | FAM43A  | 0.464552851 | 6.95E-25    |
| UNC5B-AS1 | CHST2   | 0.544121408 | 3.38E-35    |
| UNC5B-AS1 | HMGA2   | 0.53285236  | 1.45E-33    |
| UNC5B-AS1 | GALNT7  | 0.371917589 | 7.55E-16    |
| UNC5B-AS1 | CBLN1   | 0.476093661 | 3.23E-26    |
| UNC5B-AS1 | STRA6   | 0.610826938 | 3.02E-46    |
| UNC5B-AS1 | MUC21   | 0.494007485 | 2.17E-28    |
| UNC5B-AS1 | PRR36   | 0.645736591 | 3.74E-53    |
| UNC5B-AS1 | NFE2L3  | 0.618113168 | 1.29E-47    |
| UNC5B-AS1 | NR1D1   | 0.366105058 | 2.27E-15    |
| UNC5B-AS1 | MUC1    | 0.61264573  | 1.39E-46    |
| UNC5B-AS1 | NAT8L   | 0.358705357 | 8.92E-15    |
| UNC5B-AS1 | APOC1   | 0.359845737 | 7.24E-15    |
| UNC5B-AS1 | EVA1A   | 0.671757808 | 6.38E-59    |
| UNC5B-AS1 | ENTPD1  | 0.256262123 | 5.18E-08    |
| UNC5B-AS1 | COL1A1  | 0.485159536 | 2.66E-27    |
| UNC5B-AS1 | FNDC4   | 0.627300315 | 2.14E-49    |
| UNC5B-AS1 | FRMD3   | 0.133484249 | 0.005088484 |
| UNC5B-AS1 | SHROOM4 | 0.416336077 | 7.83E-20    |
| UNC5B-AS1 | NELL2   | 0.359887295 | 7.18E-15    |
| UNC5B-AS1 | EPHB3   | 0.60286726  | 8.65E-45    |
| UNC5B-AS1 | TMC6    | 0.614644656 | 5.84E-47    |

|           |           |             |             |
|-----------|-----------|-------------|-------------|
| UNC5B-AS1 | NOD1      | 0.485718521 | 2.28E-27    |
| UNC5B-AS1 | GGCT      | 0.581788112 | 4.02E-41    |
| UNC5B-AS1 | ICAM1     | 0.473396749 | 6.68E-26    |
| UNC5B-AS1 | PRSS23    | 0.537190624 | 3.46E-34    |
| UNC5B-AS1 | CFI       | 0.575385676 | 4.63E-40    |
| UNC5B-AS1 | CD55      | 0.590378687 | 1.39E-42    |
| UNC5B-AS1 | RASD2     | 0.521126167 | 6.21E-32    |
| UNC5B-AS1 | KLK11     | 0.443775898 | 1.31E-22    |
| UNC5B-AS1 | ICAM5     | 0.577382049 | 2.17E-40    |
| UNC5B-AS1 | ADORA1    | 0.520646328 | 7.22E-32    |
| UNC5B-AS1 | ITGA2     | 0.530965202 | 2.67E-33    |
| UNC5B-AS1 | ABCC3     | 0.395531386 | 6.84E-18    |
| UNC5B-AS1 | MFGE8     | 0.620051672 | 5.49E-48    |
| UNC5B-AS1 | STK32A    | 0.407372184 | 5.58E-19    |
| UNC5B-AS1 | CYSLTR2   | 0.429248747 | 4.16E-21    |
| UNC5B-AS1 | LAD1      | 0.531767581 | 2.06E-33    |
| UNC5B-AS1 | MGAT3     | 0.536365268 | 4.55E-34    |
| UNC5B-AS1 | IGFBP6    | 0.695220832 | 1.19E-64    |
| UNC5B-AS1 | CYP2S1    | 0.691871889 | 8.44E-64    |
| UNC5B-AS1 | KCNJ2     | 0.529000175 | 5.05E-33    |
| UNC5B-AS1 | FAM20A    | 0.668285041 | 4.06E-58    |
| UNC5B-AS1 | TGFA      | 0.402491105 | 1.59E-18    |
| UNC5B-AS1 | MXRA8     | 0.701333335 | 3.09E-66    |
| UNC5B-AS1 | C8orf4    | 0.527255281 | 8.86E-33    |
| UNC5B-AS1 | CLDN10    | 0.635111193 | 5.88E-51    |
| UNC5B-AS1 | PDE5A     | 0.349209004 | 4.91E-14    |
| UNC5B-AS1 | APOE      | 0.384564454 | 6.37E-17    |
| UNC5B-AS1 | SPOCK2    | 0.512450206 | 9.15E-31    |
| UNC5B-AS1 | TENM1     | 0.285474133 | 1.12E-09    |
| UNC5B-AS1 | SLIT1     | 0.374918177 | 4.24E-16    |
| UNC5B-AS1 | CXCL14    | 0.503349297 | 1.42E-29    |
| UNC5B-AS1 | ECM1      | 0.359403201 | 7.85E-15    |
| UNC5B-AS1 | DUSP5     | 0.5755912   | 4.28E-40    |
| UNC5B-AS1 | SEZ6L2    | 0.551769467 | 2.43E-36    |
| UNC5B-AS1 | THRSP     | 0.182444539 | 0.000121021 |
| UNC5B-AS1 | C19orf33  | 0.738821622 | 6.44E-77    |
| UNC5B-AS1 | MPZL2     | 0.485846459 | 2.20E-27    |
| UNC5B-AS1 | CTSH      | 0.564344562 | 2.77E-38    |
| UNC5B-AS1 | CYP1B1    | 0.409051975 | 3.88E-19    |
| UNC5B-AS1 | ALOX5     | 0.609277923 | 5.85E-46    |
| UNC5B-AS1 | SYTL5     | 0.512691916 | 8.50E-31    |
| UNC5B-AS1 | TNFRSF12A | 0.673587522 | 2.38E-59    |
| UNC5B-AS1 | DUSP6     | 0.551735568 | 2.46E-36    |
| UNC5B-AS1 | ALOX15B   | 0.593171907 | 4.54E-43    |
| UNC5B-AS1 | SDC4      | 0.545509153 | 2.11E-35    |
| UNC5B-AS1 | MDK       | 0.6709794   | 9.68E-59    |
| UNC5B-AS1 | KRT19     | 0.752330296 | 3.13E-81    |
| UNC5B-AS1 | MET       | 0.443196126 | 1.51E-22    |
| UNC5B-AS1 | TESC      | 0.372305091 | 7.01E-16    |
| UNC5B-AS1 | CXCL17    | 0.542274197 | 6.32E-35    |
| UNC5B-AS1 | NPC2      | 0.553094237 | 1.53E-36    |

|           |          |             |          |
|-----------|----------|-------------|----------|
| UNC5B-AS1 | COMP     | 0.539880019 | 1.41E-34 |
| UNC5B-AS1 | TUSC3    | 0.574707831 | 5.98E-40 |
| UNC5B-AS1 | TMPRSS4  | 0.665012975 | 2.27E-57 |
| UNC5B-AS1 | LGALS3   | 0.640153554 | 5.47E-52 |
| UNC5B-AS1 | CRLF1    | 0.61222674  | 1.66E-46 |
| UNC5B-AS1 | CTXN1    | 0.781818749 | 1.08E-91 |
| UNC5B-AS1 | PCSK1N   | 0.655327409 | 3.26E-55 |
| UNC5B-AS1 | NMU      | 0.469757956 | 1.77E-25 |
| UNC5B-AS1 | GALE     | 0.654773672 | 4.31E-55 |
| UNC5B-AS1 | PCSK2    | 0.306580656 | 5.24E-11 |
| UNC5B-AS1 | GJB3     | 0.596826369 | 1.04E-43 |
| UNC5B-AS1 | SLPI     | 0.669521019 | 2.11E-58 |
| UNC5B-AS1 | AGR2     | 0.453529325 | 1.17E-23 |
| UNC5B-AS1 | MRC2     | 0.664725469 | 2.64E-57 |
| UNC5B-AS1 | GOLT1A   | 0.584648564 | 1.32E-41 |
| UNC5B-AS1 | SLC27A6  | 0.525969111 | 1.34E-32 |
| UNC5B-AS1 | KCNN4    | 0.74252048  | 4.51E-78 |
| UNC5B-AS1 | ETV4     | 0.541440401 | 8.37E-35 |
| UNC5B-AS1 | SYT12    | 0.577771395 | 1.87E-40 |
| UNC5B-AS1 | PVRL4    | 0.618360393 | 1.16E-47 |
| UNC5B-AS1 | PLCD3    | 0.56553884  | 1.79E-38 |
| UNC5B-AS1 | PLAU     | 0.642996843 | 1.40E-52 |
| UNC5B-AS1 | LRRK2    | 0.242368216 | 2.74E-07 |
| UNC5B-AS1 | SFN      | 0.680311221 | 6.00E-61 |
| UNC5B-AS1 | LPAR5    | 0.45507593  | 7.94E-24 |
| UNC5B-AS1 | NGEF     | 0.603334617 | 7.12E-45 |
| UNC5B-AS1 | DTX4     | 0.426819341 | 7.30E-21 |
| UNC5B-AS1 | CST6     | 0.705283971 | 2.78E-67 |
| UNC5B-AS1 | QPCT     | 0.487229382 | 1.49E-27 |
| UNC5B-AS1 | TIMP1    | 0.73075131  | 1.82E-74 |
| UNC5B-AS1 | CAMK2N1  | 0.579411754 | 1.00E-40 |
| UNC5B-AS1 | KLHDC8A  | 0.441132947 | 2.49E-22 |
| UNC5B-AS1 | PDLIM4   | 0.769874268 | 2.88E-87 |
| UNC5B-AS1 | SCEL     | 0.468638218 | 2.38E-25 |
| UNC5B-AS1 | LCN2     | 0.624967076 | 6.13E-49 |
| UNC5B-AS1 | PROS1    | 0.489281072 | 8.36E-28 |
| UNC5B-AS1 | GABRB2   | 0.478973403 | 1.47E-26 |
| UNC5B-AS1 | TMPRSS6  | 0.619501481 | 6.99E-48 |
| UNC5B-AS1 | KLK7     | 0.481673116 | 7.01E-27 |
| UNC5B-AS1 | PDZK1IP1 | 0.584099934 | 1.64E-41 |
| UNC5B-AS1 | CDH3     | 0.605362195 | 3.05E-45 |
| UNC5B-AS1 | LRP4     | 0.37932963  | 1.80E-16 |
| UNC5B-AS1 | IGSF1    | 0.442567783 | 1.76E-22 |
| UNC5B-AS1 | B3GNT3   | 0.646134305 | 3.08E-53 |
| UNC5B-AS1 | CLDN1    | 0.576259258 | 3.33E-40 |
| UNC5B-AS1 | GDF15    | 0.624457026 | 7.71E-49 |
| UNC5B-AS1 | ARHGAP36 | 0.448815114 | 3.80E-23 |
| UNC5B-AS1 | LAMB3    | 0.615588306 | 3.88E-47 |
| UNC5B-AS1 | KLK10    | 0.57967685  | 9.05E-41 |
| UNC5B-AS1 | DPP4     | 0.438562696 | 4.63E-22 |
| UNC5B-AS1 | METTL7B  | 0.500791812 | 3.02E-29 |

|               |           |              |          |
|---------------|-----------|--------------|----------|
| UNC5B-AS1     | LIPH      | 0.594517385  | 2.64E-43 |
| UNC5B-AS1     | CLDN16    | 0.481420396  | 7.52E-27 |
| UNC5B-AS1     | CHI3L1    | 0.49359267   | 2.44E-28 |
| UNC5B-AS1     | SLC22A31  | 0.732239382  | 6.52E-75 |
| UNC5B-AS1     | TACSTD2   | 0.568169797  | 6.83E-39 |
| UNC5B-AS1     | SFTPBP    | 0.621419134  | 2.99E-48 |
| UNC5B-AS1     | RXRG      | 0.398203335  | 3.92E-18 |
| UNC5B-AS1     | DCSTAMP   | 0.492189721  | 3.65E-28 |
| UNC5B-AS1     | CITED1    | 0.435733875  | 9.08E-22 |
| UNC5B-AS1     | SERPINA1  | 0.685351727  | 3.56E-62 |
| UNC5B-AS1     | PRR15     | 0.534286486  | 9.03E-34 |
| UNC5B-AS1     | SLC34A2   | 0.478952553  | 1.48E-26 |
| UNC5B-AS1     | FN1       | 0.573811697  | 8.37E-40 |
| UNC5B-AS1     | ZCCHC12   | 0.398181208  | 3.94E-18 |
| RP4-758J18.10 | TFF3      | -0.370520287 | 9.62E-16 |
| RP4-758J18.10 | CCL21     | -0.217761561 | 4.13E-06 |
| RP4-758J18.10 | TPO       | -0.457490419 | 0        |
| RP4-758J18.10 | MT1G      | -0.423097609 | 0        |
| RP4-758J18.10 | DIO1      | -0.406557698 | 0        |
| RP4-758J18.10 | DPT       | -0.22256431  | 2.49E-06 |
| RP4-758J18.10 | CDH16     | -0.422528559 | 0        |
| RP4-758J18.10 | CRABP1    | -0.455004762 | 8.08E-24 |
| RP4-758J18.10 | SLC26A7   | -0.529682966 | 0        |
| RP4-758J18.10 | MT1H      | -0.41152929  | 2.26E-19 |
| RP4-758J18.10 | SLC26A4   | -0.437358056 | 0        |
| RP4-758J18.10 | SLC5A8    | -0.529360374 | 4.50E-33 |
| RP4-758J18.10 | PKHD1L1   | -0.448347544 | 4.27E-23 |
| RP4-758J18.10 | TFCP2L1   | -0.554496663 | 0        |
| RP4-758J18.10 | WSCD2     | -0.444424469 | 1.12E-22 |
| RP4-758J18.10 | IPCEF1    | -0.46760752  | 0        |
| RP4-758J18.10 | SLC5A5    | -0.296730924 | 2.25E-10 |
| RP4-758J18.10 | MT1F      | -0.381720314 | 2.24E-17 |
| RP4-758J18.10 | FOSB      | -0.202702423 | 1.95E-05 |
| RP4-758J18.10 | SEMA3D    | -0.453307658 | 1.24E-23 |
| RP4-758J18.10 | BMP8A     | -0.362561096 | 5.33E-15 |
| RP4-758J18.10 | MATN2     | -0.536666317 | 0        |
| RP4-758J18.10 | PLA2R1    | -0.460082067 | 0        |
| RP4-758J18.10 | COL23A1   | -0.412401388 | 0        |
| RP4-758J18.10 | HGD       | -0.459305367 | 0        |
| RP4-758J18.10 | TCEAL2    | -0.282076042 | 2.11E-09 |
| RP4-758J18.10 | CHRD1     | -0.245578023 | 1.88E-07 |
| RP4-758J18.10 | TNFRSF11B | -0.44446665  | 0        |
| RP4-758J18.10 | FAM167A   | -0.490872355 | 0        |
| RP4-758J18.10 | KIT       | -0.431116088 | 0        |
| RP4-758J18.10 | SLC4A4    | -0.583990843 | 0        |
| RP4-758J18.10 | SMOC2     | -0.262684778 | 2.62E-08 |
| RP4-758J18.10 | FHL1      | -0.47426961  | 0        |
| RP4-758J18.10 | OTOS      | -0.353186513 | 3.22E-14 |
| RP4-758J18.10 | IGFBPL1   | -0.573169886 | 1.07E-39 |
| RP4-758J18.10 | HBB       | -0.268189052 | 1.31E-08 |
| RP4-758J18.10 | BEX1      | -0.306290902 | 6.88E-11 |

|               |            |              |             |
|---------------|------------|--------------|-------------|
| RP4-758J18.10 | FABP4      | -0.439932746 | 3.33E-22    |
| RP4-758J18.10 | LMOD1      | -0.386486467 | 0           |
| RP4-758J18.10 | SOD3       | -0.380734121 | 4.09E-17    |
| RP4-758J18.10 | TMEM171    | -0.450643799 | 0           |
| RP4-758J18.10 | PI16       | -0.195318524 | 3.91E-05    |
| RP4-758J18.10 | ZMAT4      | -0.443803613 | 1.30E-22    |
| RP4-758J18.10 | MFAP4      | -0.105802699 | 0.026682793 |
| RP4-758J18.10 | CWH43      | -0.478108378 | 1.87E-26    |
| RP4-758J18.10 | SPX        | -0.509054031 | 0           |
| RP4-758J18.10 | APOD       | -0.093246709 | 0.050914856 |
| RP4-758J18.10 | DPP6       | -0.392461924 | 0           |
| RP4-758J18.10 | MMRN1      | -0.362103104 | 5.84E-15    |
| RP4-758J18.10 | WDR72      | -0.534976753 | 0           |
| RP4-758J18.10 | MPPED2     | -0.485412193 | 0           |
| RP4-758J18.10 | PAPSS2     | -0.425790955 | 0           |
| RP4-758J18.10 | DCN        | -0.128382177 | 0.007106573 |
| RP4-758J18.10 | SORBS2     | -0.491152483 | 0           |
| RP4-758J18.10 | EGR2       | -0.259121546 | 4.07E-08    |
| RP4-758J18.10 | EDN3       | -0.32730056  | 2.02E-12    |
| RP4-758J18.10 | DIO2       | -0.569224747 | 0           |
| RP4-758J18.10 | ITPR1      | -0.459901508 | 0           |
| RP4-758J18.10 | CFD        | -0.058191662 | 0.223582573 |
| RP4-758J18.10 | CPXM1      | -0.1965813   | 3.48E-05    |
| RP4-758J18.10 | ELMO1      | -0.457424323 | 0           |
| RP4-758J18.10 | GPC3       | -0.31171356  | 2.40E-11    |
| RP4-758J18.10 | MYOC       | -0.121209607 | 0.011029576 |
| RP4-758J18.10 | DEPTOR     | -0.486749008 | 0           |
| RP4-758J18.10 | DGKI       | -0.478366008 | 0           |
| RP4-758J18.10 | CARTPT     | -0.376375779 | 3.20E-16    |
| RP4-758J18.10 | IYD        | -0.609082966 | 0           |
| RP4-758J18.10 | LYVE1      | -0.262137713 | 2.80E-08    |
| RP4-758J18.10 | CLCNKB     | -0.407169441 | 0           |
| RP4-758J18.10 | NCAM1      | -0.472698905 | 0           |
| RP4-758J18.10 | HBA2       | -0.144312047 | 0.002458909 |
| RP4-758J18.10 | GLT8D2     | -0.345623757 | 1.25E-13    |
| RP4-758J18.10 | OGDHL      | -0.564891197 | 0           |
| RP4-758J18.10 | LIFR       | -0.509662655 | 0           |
| RP4-758J18.10 | CSGALNACT1 | -0.507115969 | 0           |
| RP4-758J18.10 | RAP1GAP    | -0.540307276 | 0           |
| RP4-758J18.10 | COL9A3     | -0.26862747  | 1.23E-08    |
| RP4-758J18.10 | FBLN1      | -0.096146994 | 0.044101151 |
| RP4-758J18.10 | EFEMP1     | -0.305184856 | 8.10E-11    |
| RP4-758J18.10 | AOX1       | -0.411739661 | 2.16E-19    |
| RP4-758J18.10 | GRIN2C     | -0.419400341 | 0           |
| RP4-758J18.10 | C11orf74   | -0.383513136 | 0           |
| RP4-758J18.10 | PPARGC1A   | -0.625601886 | 0           |
| RP4-758J18.10 | ANGPTL1    | -0.40525847  | 0           |
| RP4-758J18.10 | SCARA5     | -0.183722973 | 0.000108189 |
| RP4-758J18.10 | LTF        | -0.353628336 | 2.97E-14    |
| RP4-758J18.10 | CA4        | -0.364756368 | 2.92E-15    |
| RP4-758J18.10 | TG         | -0.484816761 | 0           |

|               |          |              |             |
|---------------|----------|--------------|-------------|
| RP4-758J18.10 | FCGBP    | -0.374180252 | 3.90E-16    |
| RP4-758J18.10 | PBX4     | -0.270565675 | 9.62E-09    |
| RP4-758J18.10 | CYR61    | -0.220468375 | 3.29E-06    |
| RP4-758J18.10 | FOS      | -0.221852279 | 2.85E-06    |
| RP4-758J18.10 | KHDRBS2  | -0.37482859  | 3.28E-16    |
| RP4-758J18.10 | MUM1L1   | -0.396375636 | 0           |
| RP4-758J18.10 | RGS16    | -0.412608186 | 0           |
| RP4-758J18.10 | MT1M     | -0.369350272 | 1.26E-15    |
| RP4-758J18.10 | LRP2     | -0.495994661 | 0           |
| RP4-758J18.10 | MAFB     | -0.406439689 | 0           |
| RP4-758J18.10 | KCNK2    | -0.408866948 | 0           |
| RP4-758J18.10 | TBC1D4   | -0.41555542  | 0           |
| RP4-758J18.10 | MIOX     | -0.338039383 | 3.39E-13    |
| RP4-758J18.10 | TPPP     | -0.477581932 | 0           |
| RP4-758J18.10 | FMOD     | -0.474020969 | 0           |
| RP4-758J18.10 | CITED2   | -0.446410953 | 0           |
| RP4-758J18.10 | RGS8     | -0.423211701 | 1.67E-20    |
| RP4-758J18.10 | ABI3BP   | -0.380565193 | 4.46E-17    |
| RP4-758J18.10 | ADH1B    | -0.22031421  | 3.16E-06    |
| RP4-758J18.10 | OGN      | -0.184185036 | 0.000103875 |
| RP4-758J18.10 | NR4A1    | -0.160950819 | 0.000722634 |
| RP4-758J18.10 | FOXJ1    | -0.293315296 | 3.69E-10    |
| RP4-758J18.10 | ALDH1A1  | -0.449839724 | 0           |
| RP4-758J18.10 | OCA2     | -0.267453714 | 1.26E-08    |
| RP4-758J18.10 | TMEM139  | -0.291623525 | 5.68E-10    |
| RP4-758J18.10 | ARHGAP24 | -0.511608376 | 0           |
| RP4-758J18.10 | SLC25A15 | -0.606052332 | 0           |
| RP4-758J18.10 | DES      | -0.205703278 | 1.40E-05    |
| RP4-758J18.10 | GDF10    | -0.292978204 | 3.88E-10    |
| RP4-758J18.10 | KIAA1324 | -0.377935816 | 1.29E-16    |
| RP4-758J18.10 | JUN      | -0.235899971 | 6.22E-07    |
| RP4-758J18.10 | C7       | -0.033865033 | 0.478962282 |
| RP4-758J18.10 | LGI3     | -0.425401186 | 0           |
| RP4-758J18.10 | CDON     | -0.520127824 | 0           |
| RP4-758J18.10 | BCL2     | -0.60032424  | 0           |
| RP4-758J18.10 | HLF      | -0.438468783 | 0           |
| RP4-758J18.10 | EGR1     | -0.271349325 | 8.70E-09    |
| RP4-758J18.10 | IP6K3    | -0.421966033 | 0           |
| RP4-758J18.10 | SCUBE3   | -0.413862878 | 0           |
| RP4-758J18.10 | PKNOX2   | -0.311548521 | 3.14E-11    |
| RP4-758J18.10 | SMAD9    | -0.471770298 | 0           |
| RP4-758J18.10 | IQGAP2   | -0.579755161 | 0           |
| RP4-758J18.10 | GNA14    | -0.450256725 | 0           |
| RP4-758J18.10 | LAYN     | -0.266303469 | 1.66E-08    |
| RP4-758J18.10 | AVPR1A   | -0.48882834  | 0           |
| RP4-758J18.10 | PDLIM3   | -0.383770995 | 0           |
| RP4-758J18.10 | GPM6A    | -0.504005481 | 0           |
| RP4-758J18.10 | SDPR     | -0.350795848 | 4.98E-14    |
| RP4-758J18.10 | CRYAB    | -0.366795502 | 2.21E-15    |
| RP4-758J18.10 | FOXA2    | -0.220112375 | 3.23E-06    |
| RP4-758J18.10 | C8orf88  | -0.478906549 | 0           |



|               |          |              |             |
|---------------|----------|--------------|-------------|
| RP4-758J18.10 | ISM1     | -0.285705654 | 1.29E-09    |
| RP4-758J18.10 | BMP2     | -0.28131466  | 2.34E-09    |
| RP4-758J18.10 | ID4      | -0.400915275 | 0           |
| RP4-758J18.10 | NUPR1    | -0.396000618 | 0           |
| RP4-758J18.10 | SERTM1   | -0.520184152 | 8.35E-32    |
| RP4-758J18.10 | IRS1     | -0.438822383 | 0           |
| RP4-758J18.10 | FIBIN    | -0.380545194 | 4.51E-17    |
| RP4-758J18.10 | PODN     | -0.110201778 | 0.020960766 |
| RP4-758J18.10 | TDRD9    | -0.460119228 | 0           |
| RP4-758J18.10 | EPHA3    | -0.290131682 | 6.99E-10    |
| RP4-758J18.10 | AIF1L    | -0.45033814  | 0           |
| RP4-758J18.10 | EBF4     | -0.332341419 | 1.19E-12    |
| RP4-758J18.10 | ADM2     | -0.501256961 | 0           |
| RP4-758J18.10 | GSTM3    | -0.432275323 | 0           |
| RP4-758J18.10 | HSD17B6  | -0.299100043 | 1.97E-10    |
| RP4-758J18.10 | AGR3     | -0.199158903 | 2.63E-05    |
| RP4-758J18.10 | EPHB1    | -0.521768737 | 0           |
| RP4-758J18.10 | TMOD1    | -0.24611806  | 1.94E-07    |
| RP4-758J18.10 | WASF3    | -0.556807899 | 0           |
| RP4-758J18.10 | SELV     | -0.382606803 | 9.41E-17    |
| RP4-758J18.10 | ENPP1    | -0.437159768 | 0           |
| RP4-758J18.10 | SYNE1    | -0.504208751 | 1.10E-29    |
| RP4-758J18.10 | PLCH1    | -0.377850714 | 1.32E-16    |
| RP4-758J18.10 | CCDC146  | -0.37703827  | 1.72E-16    |
| RP4-758J18.10 | SLC16A2  | -0.368258836 | 1.61E-15    |
| RP4-758J18.10 | IER2     | -0.191884363 | 5.36E-05    |
| RP4-758J18.10 | KCNAB1   | -0.318840368 | 1.03E-11    |
| RP4-758J18.10 | SYNDIG1  | -0.365808032 | 2.73E-15    |
| RP4-758J18.10 | C16orf89 | -0.359414865 | 9.92E-15    |
| RP4-758J18.10 | CTGF     | -0.139008332 | 0.003543145 |
| RP4-758J18.10 | NR4A3    | -0.164405972 | 0.000551973 |
| RP4-758J18.10 | KIAA1456 | -0.519440339 | 0           |
| RP4-758J18.10 | AQP4     | -0.38749961  | 0           |
| RP4-758J18.10 | RNF150   | -0.457699203 | 0           |
| RP4-758J18.10 | C1S      | -0.047742378 | 0.318132144 |
| RP4-758J18.10 | PFKFB2   | -0.62382183  | 0           |
| RP4-758J18.10 | PROX1    | -0.421518111 | 0           |
| RP4-758J18.10 | TCF7L1   | -0.355539307 | 2.08E-14    |
| RP4-758J18.10 | HSPB6    | -0.151085621 | 0.001515369 |
| RP4-758J18.10 | FHDC1    | -0.451530848 | 0           |
| RP4-758J18.10 | PRR15L   | -0.402476193 | 0           |
| RP4-758J18.10 | SLC1A1   | -0.491742951 | 0           |
| RP4-758J18.10 | BTBD11   | -0.422232403 | 0           |
| RP4-758J18.10 | TRIM58   | -0.602656609 | 0           |
| RP4-758J18.10 | LRIG1    | -0.487012399 | 0           |
| RP4-758J18.10 | ROR2     | -0.273863814 | 6.27E-09    |
| RP4-758J18.10 | GPR125   | -0.478090418 | 0           |
| RP4-758J18.10 | FLRT1    | -0.378423026 | 1.09E-16    |
| RP4-758J18.10 | PGF      | -0.272770108 | 7.23E-09    |
| RP4-758J18.10 | DUSP1    | -0.198555672 | 2.89E-05    |
| RP4-758J18.10 | PLA2G7   | -0.332338724 | 1.19E-12    |

|               |          |              |             |
|---------------|----------|--------------|-------------|
| RP4-758J18.10 | PLSCR4   | -0.387206149 | 0           |
| RP4-758J18.10 | FAM46B   | -0.362179271 | 5.75E-15    |
| RP4-758J18.10 | GLDC     | -0.351827004 | 4.13E-14    |
| RP4-758J18.10 | ZBTB16   | -0.44829455  | 0           |
| RP4-758J18.10 | OMD      | -0.139814714 | 0.003329861 |
| RP4-758J18.10 | HSD11B2  | -0.303198144 | 1.08E-10    |
| RP4-758J18.10 | FGL2     | -0.145757651 | 0.00222124  |
| RP4-758J18.10 | CLCNKA   | -0.376255981 | 3.27E-16    |
| RP4-758J18.10 | GATM     | -0.560644026 | 0           |
| RP4-758J18.10 | TNS3     | -0.520471353 | 0           |
| RP4-758J18.10 | TOB1     | -0.339268035 | 3.75E-13    |
| RP4-758J18.10 | MARC2    | -0.543460457 | 0           |
| RP4-758J18.10 | LRRC2    | -0.554712681 | 0           |
| RP4-758J18.10 | SORD     | -0.445061657 | 0           |
| RP4-758J18.10 | RIMS4    | -0.377761924 | 1.36E-16    |
| RP4-758J18.10 | SLC29A4  | -0.35239875  | 3.72E-14    |
| RP4-758J18.10 | SLC39A14 | -0.624249894 | 0           |
| RP4-758J18.10 | FAXDC2   | -0.492865734 | 0           |
| RP4-758J18.10 | HSPB8    | -0.336462639 | 6.01E-13    |
| RP4-758J18.10 | CCL19    | 0.094712641  | 0.047339228 |
| RP4-758J18.10 | KCNIP3   | -0.344552461 | 1.51E-13    |
| RP4-758J18.10 | CGNL1    | -0.465193877 | 0           |
| RP4-758J18.10 | ATF3     | -0.064262433 | 0.178878839 |
| RP4-758J18.10 | SGCD     | -0.378355512 | 1.11E-16    |
| RP4-758J18.10 | STARD13  | -0.46657225  | 0           |
| RP4-758J18.10 | LDHD     | -0.468262098 | 0           |
| RP4-758J18.10 | RCAN1    | -0.348625173 | 7.36E-14    |
| RP4-758J18.10 | ID3      | -0.321094018 | 7.23E-12    |
| RP4-758J18.10 | SYTL3    | -0.472674084 | 0           |
| RP4-758J18.10 | MT1E     | -0.300451751 | 1.62E-10    |
| RP4-758J18.10 | CAMK1D   | -0.46048914  | 0           |
| RP4-758J18.10 | PRKCQ    | -0.536225913 | 0           |
| RP4-758J18.10 | NUAK2    | -0.407897633 | 0           |
| RP4-758J18.10 | LIPG     | -0.447738265 | 0           |
| RP4-758J18.10 | SLC25A25 | -0.410091996 | 0           |
| RP4-758J18.10 | PRKX     | -0.416031567 | 0           |
| RP4-758J18.10 | SRPX     | -0.10898907  | 0.022420466 |
| RP4-758J18.10 | FAM189A1 | -0.352763271 | 3.48E-14    |
| RP4-758J18.10 | PLEKHH1  | -0.371142385 | 8.32E-16    |
| RP4-758J18.10 | WNT11    | -0.261928928 | 2.87E-08    |
| RP4-758J18.10 | SNAI1    | -0.272868259 | 7.14E-09    |
| RP4-758J18.10 | FDCSP    | 0.030281201  | 0.526865672 |
| RP4-758J18.10 | MT1X     | -0.235684662 | 6.37E-07    |
| RP4-758J18.10 | ACACB    | -0.525692662 | 0           |
| RP4-758J18.10 | ARC      | -0.074340245 | 0.119843052 |
| RP4-758J18.10 | KLK4     | -0.353900161 | 2.13E-14    |
| RP4-758J18.10 | ZFPM2    | -0.279442977 | 3.00E-09    |
| RP4-758J18.10 | AKAP12   | -0.359893849 | 9.04E-15    |
| RP4-758J18.10 | GJB6     | -0.370426443 | 1.00E-15    |
| RP4-758J18.10 | ERO1LB   | -0.474194294 | 0           |
| RP4-758J18.10 | DNALI1   | -0.21292037  | 7.14E-06    |

|               |          |              |             |
|---------------|----------|--------------|-------------|
| RP4-758J18.10 | HKDC1    | -0.354449998 | 2.55E-14    |
| RP4-758J18.10 | ZFP36L2  | -0.445220798 | 0           |
| RP4-758J18.10 | CAPSL    | -0.294997416 | 2.90E-10    |
| RP4-758J18.10 | CYP7B1   | -0.53826553  | 0           |
| RP4-758J18.10 | CPQ      | -0.342850274 | 2.03E-13    |
| RP4-758J18.10 | RPS6KA6  | -0.492399107 | 3.44E-28    |
| RP4-758J18.10 | TLE1     | -0.424445346 | 0           |
| RP4-758J18.10 | TP53INP2 | -0.464858858 | 0           |
| RP4-758J18.10 | KATNAL2  | -0.488656434 | 0           |
| RP4-758J18.10 | SGPP2    | -0.386805175 | 0           |
| RP4-758J18.10 | CTH      | -0.483170032 | 0           |
| RP4-758J18.10 | KIF12    | -0.127623349 | 0.007455159 |
| RP4-758J18.10 | TMEM220  | -0.483610436 | 0           |
| RP4-758J18.10 | CENPJ    | -0.404118525 | 0           |
| RP4-758J18.10 | FAM155B  | -0.173216895 | 0.00027115  |
| RP4-758J18.10 | WFS1     | -0.43442756  | 0           |
| RP4-758J18.10 | SELENBP1 | -0.277833977 | 3.72E-09    |
| RP4-758J18.10 | SNTA1    | -0.45186913  | 0           |
| RP4-758J18.10 | FRAS1    | -0.397081843 | 0           |
| RP4-758J18.10 | FBLN7    | -0.472875351 | 0           |
| RP4-758J18.10 | AGPAT9   | -0.512989161 | 0           |
| RP4-758J18.10 | GPR83    | -0.351084345 | 4.73E-14    |
| RP4-758J18.10 | PRTG     | -0.484264447 | 0           |
| RP4-758J18.10 | EGR3     | -0.05407952  | 0.258074639 |
| RP4-758J18.10 | GRAMD2   | -0.311690926 | 3.07E-11    |
| RP4-758J18.10 | HYOU1    | -0.548866438 | 0           |
| RP4-758J18.10 | FBLN5    | -0.195977641 | 3.68E-05    |
| RP4-758J18.10 | ITM2A    | -0.351816366 | 4.14E-14    |
| RP4-758J18.10 | SRF      | -0.231562166 | 1.00E-06    |
| RP4-758J18.10 | FGFR2    | -0.395546881 | 0           |
| RP4-758J18.10 | MT1A     | -0.176236542 | 0.00020634  |
| RP4-758J18.10 | MAMDC2   | -0.203219136 | 1.86E-05    |
| RP4-758J18.10 | FHL2     | -0.281416215 | 2.30E-09    |
| RP4-758J18.10 | FTCDNL1  | -0.614542419 | 0           |
| RP4-758J18.10 | PKIA     | -0.338511192 | 4.26E-13    |
| RP4-758J18.10 | DNAJB4   | -0.406240692 | 0           |
| RP4-758J18.10 | SLC25A33 | -0.44034004  | 0           |
| RP4-758J18.10 | EYA2     | -0.419600757 | 0           |
| RP4-758J18.10 | LPAR1    | -0.384910089 | 0           |
| RP4-758J18.10 | STX11    | -0.395494969 | 0           |
| RP4-758J18.10 | ARHGEF28 | -0.534301892 | 0           |
| RP4-758J18.10 | OR2W3    | -0.494500833 | 0           |
| RP4-758J18.10 | ALDH1B1  | -0.587826565 | 3.81E-42    |
| RP4-758J18.10 | CXCL12   | -0.167349518 | 0.000436962 |
| RP4-758J18.10 | OLFM2    | -0.184330259 | 0.000105296 |
| RP4-758J18.10 | TUB      | -0.453913428 | 0           |
| RP4-758J18.10 | HTRA3    | -0.138145536 | 0.003755823 |
| RP4-758J18.10 | CKB      | -0.226216324 | 1.79E-06    |
| RP4-758J18.10 | RGS2     | -0.09478862  | 0.047190333 |
| RP4-758J18.10 | SHANK2   | -0.458154642 | 0           |
| RP4-758J18.10 | CNTFR    | -0.320973331 | 5.62E-12    |

|               |          |              |             |
|---------------|----------|--------------|-------------|
| RP4-758J18.10 | CYTH3    | -0.47225921  | 0           |
| RP4-758J18.10 | PLAC9    | -0.038781392 | 0.417476087 |
| RP4-758J18.10 | WVOX     | -0.437723429 | 0           |
| RP4-758J18.10 | NPR3     | -0.26467064  | 2.04E-08    |
| RP4-758J18.10 | SDC2     | -0.291579413 | 5.71E-10    |
| RP4-758J18.10 | KLF15    | -0.417558018 | 0           |
| RP4-758J18.10 | TMEM164  | -0.505029545 | 0           |
| RP4-758J18.10 | LONRF3   | -0.305567817 | 7.66E-11    |
| RP4-758J18.10 | GBP1     | -0.12342809  | 0.009672752 |
| RP4-758J18.10 | ARHGAP6  | -0.483240808 | 0           |
| RP4-758J18.10 | TMEM119  | -0.076684103 | 0.108585834 |
| RP4-758J18.10 | SH3RF1   | -0.573852183 | 0           |
| RP4-758J18.10 | CRELD2   | -0.267902399 | 1.35E-08    |
| RP4-758J18.10 | PCP4     | -0.071087777 | 0.136949676 |
| RP4-758J18.10 | GCSH     | -0.452386552 | 0           |
| RP4-758J18.10 | IMPA2    | -0.477437826 | 0           |
| RP4-758J18.10 | C1R      | 0.025134533  | 0.599302707 |
| RP4-758J18.10 | SUCNR1   | -0.286009469 | 1.24E-09    |
| RP4-758J18.10 | SFRP1    | -0.326144838 | 3.25E-12    |
| RP4-758J18.10 | UGT8     | -0.607054695 | 0           |
| RP4-758J18.10 | TLE4     | -0.164212364 | 0.000560447 |
| RP4-758J18.10 | ANTXR1   | -0.370898708 | 8.81E-16    |
| RP4-758J18.10 | GPX3     | -0.347703515 | 8.68E-14    |
| RP4-758J18.10 | DPY19L2  | -0.312134308 | 2.87E-11    |
| RP4-758J18.10 | FAM46C   | -0.420588227 | 0           |
| RP4-758J18.10 | IL33     | -0.179294906 | 0.000158996 |
| RP4-758J18.10 | PEG3     | -0.52214106  | 0           |
| RP4-758J18.10 | FAHD2A   | -0.38395666  | 0           |
| RP4-758J18.10 | PTGDS    | 0.02816233   | 0.556053318 |
| RP4-758J18.10 | CHCHD10  | -0.342827864 | 2.04E-13    |
| RP4-758J18.10 | CD36     | -0.429523824 | 0           |
| RP4-758J18.10 | ANKRD37  | -0.172368425 | 0.000290796 |
| RP4-758J18.10 | TSPAN33  | -0.372223042 | 6.41E-16    |
| RP4-758J18.10 | PRDM16   | -0.450975272 | 0           |
| RP4-758J18.10 | UST      | -0.420924239 | 0           |
| RP4-758J18.10 | NEXN     | -0.428175095 | 0           |
| RP4-758J18.10 | NUPR1L   | -0.11886587  | 0.012693402 |
| RP4-758J18.10 | SLC24A3  | -0.507616087 | 0           |
| RP4-758J18.10 | MARC1    | -0.355786388 | 1.99E-14    |
| RP4-758J18.10 | MYH11    | -0.190937884 | 5.84E-05    |
| RP4-758J18.10 | APOA1    | -0.280037497 | 2.36E-09    |
| RP4-758J18.10 | TMEM178B | -0.351086047 | 4.73E-14    |
| RP4-758J18.10 | CAPN6    | -0.129064931 | 0.006772375 |
| RP4-758J18.10 | PPM1L    | -0.516202197 | 0           |
| RP4-758J18.10 | FZD8     | -0.397450336 | 0           |
| RP4-758J18.10 | RCAN2    | -0.388593316 | 0           |
| RP4-758J18.10 | COPZ2    | -0.456496282 | 0           |
| RP4-758J18.10 | GAS1     | -0.238545375 | 4.62E-07    |
| RP4-758J18.10 | DACT1    | -0.329792464 | 1.80E-12    |
| RP4-758J18.10 | WBSCR17  | -0.33907074  | 3.87E-13    |
| RP4-758J18.10 | NCS1     | -0.368424785 | 1.55E-15    |

|               |          |              |             |
|---------------|----------|--------------|-------------|
| RP4-758J18.10 | SPIRE2   | -0.329645237 | 1.85E-12    |
| RP4-758J18.10 | C15orf52 | -0.453044392 | 0           |
| RP4-758J18.10 | SPAG5    | -0.372530545 | 5.94E-16    |
| RP4-758J18.10 | ARL4D    | -0.349929932 | 5.83E-14    |
| RP4-758J18.10 | FAM189A2 | -0.184483585 | 0.00010389  |
| RP4-758J18.10 | MAP1LC3A | -0.285448503 | 1.33E-09    |
| RP4-758J18.10 | KLF6     | -0.095251718 | 0.046117376 |
| RP4-758J18.10 | ADD3     | -0.369873368 | 1.12E-15    |
| RP4-758J18.10 | TSPAN7   | -0.307692962 | 5.59E-11    |
| RP4-758J18.10 | KLF9     | -0.287524006 | 1.00E-09    |
| RP4-758J18.10 | KCNQ1    | -0.429642117 | 0           |
| RP4-758J18.10 | MAN1A1   | -0.18645654  | 8.73E-05    |
| RP4-758J18.10 | MLF1     | -0.330555264 | 1.59E-12    |
| RP4-758J18.10 | RARB     | -0.418977808 | 0           |
| RP4-758J18.10 | CDC42EP2 | -0.209162679 | 1.04E-05    |
| RP4-758J18.10 | FAM3B    | -0.189885736 | 6.43E-05    |
| RP4-758J18.10 | GADD45B  | -0.040990647 | 0.39143068  |
| RP4-758J18.10 | TMEM47   | -0.388396588 | 0           |
| RP4-758J18.10 | SDF2L1   | -0.179816293 | 0.000155657 |
| RP4-758J18.10 | CCDC85A  | -0.364078186 | 3.91E-15    |
| RP4-758J18.10 | CRYBG3   | -0.488891032 | 0           |
| RP4-758J18.10 | FBLN2    | -0.090507976 | 0.058135246 |
| RP4-758J18.10 | PEBP4    | -0.209298842 | 1.02E-05    |
| RP4-758J18.10 | CDADC1   | -0.446920149 | 0           |
| RP4-758J18.10 | FAM63A   | -0.509065804 | 0           |
| RP4-758J18.10 | GLUL     | -0.342105203 | 2.31E-13    |
| RP4-758J18.10 | FREM2    | -0.538461691 | 0           |
| RP4-758J18.10 | ACKR3    | -0.30946777  | 4.29E-11    |
| RP4-758J18.10 | DENND6A  | -0.527166208 | 0           |
| RP4-758J18.10 | CLDN8    | -0.341719406 | 2.47E-13    |
| RP4-758J18.10 | UTS2R    | -0.142990111 | 0.002674392 |
| RP4-758J18.10 | SCNN1B   | -0.218678532 | 3.96E-06    |
| RP4-758J18.10 | TTC30A   | -0.564211655 | 0           |
| RP4-758J18.10 | CORO2B   | -0.307395246 | 5.84E-11    |
| RP4-758J18.10 | TC2N     | -0.486513984 | 0           |
| RP4-758J18.10 | ALDH2    | -0.389167473 | 0           |
| RP4-758J18.10 | GPR183   | -0.043129977 | 0.367170904 |
| RP4-758J18.10 | C4orf47  | -0.188588777 | 7.22E-05    |
| RP4-758J18.10 | SLC25A42 | -0.337878882 | 4.74E-13    |
| RP4-758J18.10 | LGMN     | -0.528949951 | 0           |
| RP4-758J18.10 | ACSF2    | -0.411243288 | 0           |
| RP4-758J18.10 | KIAA1467 | -0.594769756 | 0           |
| RP4-758J18.10 | PRKG1    | -0.385731752 | 0           |
| RP4-758J18.10 | GNAI1    | -0.461772482 | 0           |
| RP4-758J18.10 | ABCC4    | -0.437543296 | 0           |
| RP4-758J18.10 | PRPS1    | -0.5765634   | 0           |
| RP4-758J18.10 | TSPAN5   | -0.419009722 | 0           |
| RP4-758J18.10 | CR2      | -0.141258314 | 0.003015648 |
| RP4-758J18.10 | CCDC170  | -0.47721429  | 0           |
| RP4-758J18.10 | RRAD     | 0.153313315  | 0.001286773 |
| RP4-758J18.10 | SCGB2A1  | -0.335033062 | 7.63E-13    |

|               |          |              |             |
|---------------|----------|--------------|-------------|
| RP4-758J18.10 | SESN3    | -0.312428337 | 2.75E-11    |
| RP4-758J18.10 | SGK223   | -0.287116082 | 1.06E-09    |
| RP4-758J18.10 | NDRG2    | -0.440306992 | 0           |
| RP4-758J18.10 | C3orf52  | -0.323570494 | 4.89E-12    |
| RP4-758J18.10 | FLRT3    | 0.271373154  | 8.67E-09    |
| RP4-758J18.10 | MST1R    | 0.504271283  | 0           |
| RP4-758J18.10 | SDC1     | 0.189820633  | 6.46E-05    |
| RP4-758J18.10 | ST8SIA4  | 0.330422788  | 1.63E-12    |
| RP4-758J18.10 | UBTD1    | 0.591207942  | 0           |
| RP4-758J18.10 | EPHA2    | 0.372248289  | 6.37E-16    |
| RP4-758J18.10 | TMEM130  | 0.533756954  | 0           |
| RP4-758J18.10 | SPINK2   | 0.384197783  | 0           |
| RP4-758J18.10 | MMP16    | 0.338419707  | 4.32E-13    |
| RP4-758J18.10 | SIGLEC15 | 0.57304286   | 0           |
| RP4-758J18.10 | RIN1     | 0.714397178  | 0           |
| RP4-758J18.10 | IL1RN    | 0.2055959    | 1.47E-05    |
| RP4-758J18.10 | FCER1G   | 0.348697084  | 7.27E-14    |
| RP4-758J18.10 | CD276    | 0.54331862   | 0           |
| RP4-758J18.10 | CTSB     | 0.221790438  | 2.87E-06    |
| RP4-758J18.10 | FAM171A2 | 0.359008927  | 1.07E-14    |
| RP4-758J18.10 | ASPHD1   | 0.452887095  | 0           |
| RP4-758J18.10 | C15orf48 | 0.271368331  | 8.67E-09    |
| RP4-758J18.10 | DYSF     | 0.28816667   | 9.18E-10    |
| RP4-758J18.10 | PDZRN4   | 0.408326123  | 0           |
| RP4-758J18.10 | EFHD2    | 0.50041147   | 0           |
| RP4-758J18.10 | ASF1B    | 0.248210725  | 1.51E-07    |
| RP4-758J18.10 | AQP1     | 0.330805607  | 1.53E-12    |
| RP4-758J18.10 | ARRDC2   | 0.610418079  | 0           |
| RP4-758J18.10 | PRSS1    | 0.485811018  | 2.22E-27    |
| RP4-758J18.10 | MAPK13   | 0.373411637  | 4.76E-16    |
| RP4-758J18.10 | CST5     | 0.457142033  | 4.70E-24    |
| RP4-758J18.10 | AHR      | 0.315468048  | 1.73E-11    |
| RP4-758J18.10 | BAX      | 0.532060156  | 0           |
| RP4-758J18.10 | C1orf115 | 0.313911953  | 2.19E-11    |
| RP4-758J18.10 | PLK3     | 0.526693323  | 0           |
| RP4-758J18.10 | JAG2     | 0.434086016  | 0           |
| RP4-758J18.10 | RAD23B   | 0.303635286  | 1.02E-10    |
| RP4-758J18.10 | CA12     | 0.102050256  | 0.032580952 |
| RP4-758J18.10 | ADTRP    | 0.3652126    | 3.09E-15    |
| RP4-758J18.10 | UCP2     | 0.386962473  | 0           |
| RP4-758J18.10 | IGFBP2   | 0.407327164  | 0           |
| RP4-758J18.10 | LOXL2    | 0.340243307  | 3.17E-13    |
| RP4-758J18.10 | GPX1     | 0.512979658  | 0           |
| RP4-758J18.10 | P3H3     | 0.631059495  | 0           |
| RP4-758J18.10 | C2orf81  | 0.620713327  | 0           |
| RP4-758J18.10 | CDT1     | 0.315518401  | 1.71E-11    |
| RP4-758J18.10 | SNX25    | 0.359214307  | 1.03E-14    |
| RP4-758J18.10 | MTHFD1L  | 0.323800554  | 4.72E-12    |
| RP4-758J18.10 | CDC42BPG | 0.391321425  | 1.63E-17    |
| RP4-758J18.10 | MSN      | 0.256626063  | 5.53E-08    |
| RP4-758J18.10 | SIGLEC6  | 0.405422639  | 8.49E-19    |

|               |          |             |             |
|---------------|----------|-------------|-------------|
| RP4-758J18.10 | F2R      | 0.175938324 | 0.000216189 |
| RP4-758J18.10 | TMEM184A | 0.512773285 | 0           |
| RP4-758J18.10 | CKS2     | 0.204274546 | 1.68E-05    |
| RP4-758J18.10 | TAX1BP3  | 0.593901571 | 0           |
| RP4-758J18.10 | PMEP A1  | 0.519208861 | 0           |
| RP4-758J18.10 | CXCL16   | 0.436991691 | 0           |
| RP4-758J18.10 | FAXC     | 0.47373148  | 0           |
| RP4-758J18.10 | VTCN1    | 0.344159664 | 1.19E-13    |
| RP4-758J18.10 | SH2D4A   | 0.346402869 | 1.09E-13    |
| RP4-758J18.10 | RNF24    | 0.286131165 | 1.21E-09    |
| RP4-758J18.10 | LY6G6C   | 0.396033027 | 6.16E-18    |
| RP4-758J18.10 | NID1     | 0.210591971 | 9.01E-06    |
| RP4-758J18.10 | STAC     | 0.425284454 | 0           |
| RP4-758J18.10 | RAB34    | 0.669585013 | 0           |
| RP4-758J18.10 | HES4     | 0.503313174 | 0           |
| RP4-758J18.10 | EPHA10   | 0.430353004 | 0           |
| RP4-758J18.10 | ENTPD2   | 0.576427236 | 0           |
| RP4-758J18.10 | DDB2     | 0.519912231 | 0           |
| RP4-758J18.10 | NKAIN4   | 0.567291648 | 0           |
| RP4-758J18.10 | TRIM29   | 0.408263573 | 0           |
| RP4-758J18.10 | ADCY8    | 0.461579405 | 1.50E-24    |
| RP4-758J18.10 | SFTA2    | 0.2958741   | 3.12E-10    |
| RP4-758J18.10 | NRIP1    | 0.321086643 | 7.23E-12    |
| RP4-758J18.10 | VWA1     | 0.576258734 | 0           |
| RP4-758J18.10 | APLNR    | 0.262635845 | 2.63E-08    |
| RP4-758J18.10 | REN      | 0.512540042 | 8.90E-31    |
| RP4-758J18.10 | EDIL3    | 0.233242227 | 8.35E-07    |
| RP4-758J18.10 | AGRN     | 0.436047765 | 0           |
| RP4-758J18.10 | TREM1    | 0.455809649 | 0           |
| RP4-758J18.10 | SRL      | 0.264250802 | 2.15E-08    |
| RP4-758J18.10 | RASGRF1  | 0.608081312 | 0           |
| RP4-758J18.10 | RMI2     | 0.400440688 | 0           |
| RP4-758J18.10 | SAMD1    | 0.566284179 | 0           |
| RP4-758J18.10 | MGAT4B   | 0.468762499 | 0           |
| RP4-758J18.10 | NXN      | 0.52136436  | 0           |
| RP4-758J18.10 | SH3BGRL3 | 0.523517731 | 0           |
| RP4-758J18.10 | CA11     | 0.525455368 | 0           |
| RP4-758J18.10 | PLD3     | 0.541858691 | 0           |
| RP4-758J18.10 | LURAP1L  | 0.236091167 | 6.08E-07    |
| RP4-758J18.10 | CARNS1   | 0.414432637 | 0           |
| RP4-758J18.10 | PDLIM7   | 0.631582023 | 0           |
| RP4-758J18.10 | BCL2L1   | 0.50510713  | 0           |
| RP4-758J18.10 | GGT6     | 0.324600374 | 4.15E-12    |
| RP4-758J18.10 | DPYSL3   | 0.379178876 | 8.21E-17    |
| RP4-758J18.10 | FYN      | 0.48642491  | 0           |
| RP4-758J18.10 | TK1      | 0.276945509 | 4.18E-09    |
| RP4-758J18.10 | AK1      | 0.536004505 | 0           |
| RP4-758J18.10 | HIGD1B   | 0.332284684 | 1.20E-12    |
| RP4-758J18.10 | TMEM59L  | 0.522802021 | 0           |
| RP4-758J18.10 | MEGF9    | 0.190819308 | 5.91E-05    |
| RP4-758J18.10 | ZFP36L1  | 0.399951634 | 0           |

|               |          |             |             |
|---------------|----------|-------------|-------------|
| RP4-758J18.10 | ADRA1B   | 0.387102182 | 0           |
| RP4-758J18.10 | EPHA4    | 0.363053129 | 4.82E-15    |
| RP4-758J18.10 | TCERG1L  | 0.314727233 | 1.94E-11    |
| RP4-758J18.10 | NGFR     | 0.41761915  | 0           |
| RP4-758J18.10 | EBI3     | 0.429992454 | 0           |
| RP4-758J18.10 | S100A10  | 0.480927019 | 0           |
| RP4-758J18.10 | S100B    | 0.452265281 | 0           |
| RP4-758J18.10 | CD44     | 0.342657801 | 2.10E-13    |
| RP4-758J18.10 | BHLHE41  | 0.332332767 | 1.19E-12    |
| RP4-758J18.10 | FBXO2    | 0.612326923 | 0           |
| RP4-758J18.10 | SLC30A2  | 0.148867998 | 0.001779461 |
| RP4-758J18.10 | FRMD5    | 0.362182391 | 5.75E-15    |
| RP4-758J18.10 | SAMD11   | 0.39316884  | 0           |
| RP4-758J18.10 | SIPA1L2  | 0.425804146 | 0           |
| RP4-758J18.10 | S100A16  | 0.485523251 | 0           |
| RP4-758J18.10 | PPL      | 0.296428257 | 2.88E-10    |
| RP4-758J18.10 | ARHGDIB  | 0.406656417 | 0           |
| RP4-758J18.10 | CDC42EP3 | 0.429244973 | 0           |
| RP4-758J18.10 | RUNX2    | 0.569675647 | 0           |
| RP4-758J18.10 | LAMC2    | 0.303991722 | 9.66E-11    |
| RP4-758J18.10 | BRINP1   | 0.443454358 | 0           |
| RP4-758J18.10 | GPRC5B   | 0.295467594 | 3.30E-10    |
| RP4-758J18.10 | AQP5     | 0.463327159 | 0           |
| RP4-758J18.10 | PLAG1    | 0.433105354 | 0           |
| RP4-758J18.10 | PTPRU    | 0.423755308 | 0           |
| RP4-758J18.10 | ANGPTL4  | 0.403862792 | 0           |
| RP4-758J18.10 | PALM3    | 0.406592164 | 0           |
| RP4-758J18.10 | ACP5     | 0.38708658  | 0           |
| RP4-758J18.10 | DLG4     | 0.47422408  | 0           |
| RP4-758J18.10 | ETNK2    | 0.516401337 | 0           |
| RP4-758J18.10 | CD109    | 0.437567975 | 0           |
| RP4-758J18.10 | SNX22    | 0.4606575   | 0           |
| RP4-758J18.10 | TMEM98   | 0.462130762 | 0           |
| RP4-758J18.10 | CTHRC1   | 0.415521946 | 0           |
| RP4-758J18.10 | S100A2   | 0.432787071 | 0           |
| RP4-758J18.10 | C11orf80 | 0.542186902 | 0           |
| RP4-758J18.10 | SREBF1   | 0.574970001 | 0           |
| RP4-758J18.10 | PRSS22   | 0.558115779 | 0           |
| RP4-758J18.10 | CMTM3    | 0.557064624 | 0           |
| RP4-758J18.10 | RDH5     | 0.44701447  | 0           |
| RP4-758J18.10 | MYH10    | 0.366236096 | 2.49E-15    |
| RP4-758J18.10 | EVPL     | 0.462038852 | 0           |
| RP4-758J18.10 | SCD      | 0.292323491 | 5.15E-10    |
| RP4-758J18.10 | CD151    | 0.643718175 | 0           |
| RP4-758J18.10 | S100A4   | 0.505298893 | 0           |
| RP4-758J18.10 | BNIP1    | 0.461965948 | 0           |
| RP4-758J18.10 | MAP3K6   | 0.568087922 | 0           |
| RP4-758J18.10 | MANEAL   | 0.26162639  | 2.99E-08    |
| RP4-758J18.10 | CD207    | 0.469459253 | 1.91E-25    |
| RP4-758J18.10 | CD1A     | 0.464140865 | 7.74E-25    |
| RP4-758J18.10 | C3       | 0.426682401 | 0           |



|               |          |             |             |
|---------------|----------|-------------|-------------|
| RP4-758J18.10 | NT5E     | 0.44315877  | 0           |
| RP4-758J18.10 | CACNG4   | 0.417377898 | 6.21E-20    |
| RP4-758J18.10 | FHOD1    | 0.514732197 | 0           |
| RP4-758J18.10 | LEMD1    | 0.557485738 | 0           |
| RP4-758J18.10 | ATP11A   | 0.358456755 | 1.19E-14    |
| RP4-758J18.10 | PPAP2C   | 0.445660493 | 0           |
| RP4-758J18.10 | DRAM1    | 0.470108817 | 0           |
| RP4-758J18.10 | CDA      | 0.394257298 | 0           |
| RP4-758J18.10 | CCND2    | 0.394624656 | 0           |
| RP4-758J18.10 | LCN6     | 0.464161674 | 7.70E-25    |
| RP4-758J18.10 | CDH4     | 0.344749331 | 1.46E-13    |
| RP4-758J18.10 | MMP11    | 0.509833852 | 0           |
| RP4-758J18.10 | B3GAT1   | 0.313231844 | 2.43E-11    |
| RP4-758J18.10 | SPP1     | 0.2166409   | 4.89E-06    |
| RP4-758J18.10 | HLA-DQB1 | 0.293097496 | 4.62E-10    |
| RP4-758J18.10 | SDC3     | 0.558428955 | 0           |
| RP4-758J18.10 | CX3CL1   | 0.477235566 | 0           |
| RP4-758J18.10 | SDK1     | 0.503207505 | 0           |
| RP4-758J18.10 | DOCK9    | 0.270638012 | 9.53E-09    |
| RP4-758J18.10 | CSF2     | 0.589555497 | 1.92E-42    |
| RP4-758J18.10 | GRHL3    | 0.488600975 | 0           |
| RP4-758J18.10 | TMEM92   | 0.586938465 | 5.40E-42    |
| RP4-758J18.10 | BASP1    | 0.468348619 | 0           |
| RP4-758J18.10 | HRH1     | 0.501846152 | 0           |
| RP4-758J18.10 | ESM1     | 0.181972501 | 0.000129294 |
| RP4-758J18.10 | B4GALNT3 | 0.398296536 | 0           |
| RP4-758J18.10 | LMO3     | 0.342356397 | 2.21E-13    |
| RP4-758J18.10 | C9orf16  | 0.557628568 | 0           |
| RP4-758J18.10 | SEMA3F   | 0.55118051  | 0           |
| RP4-758J18.10 | PLA2G12B | 0.34650165  | 7.90E-14    |
| RP4-758J18.10 | KLK6     | 0.504240845 | 1.09E-29    |
| RP4-758J18.10 | ST3GAL5  | 0.520287249 | 0           |
| RP4-758J18.10 | FAM132B  | 0.205791068 | 1.45E-05    |
| RP4-758J18.10 | CDKN1A   | 0.242883464 | 2.82E-07    |
| RP4-758J18.10 | E2F1     | 0.299267411 | 1.92E-10    |
| RP4-758J18.10 | B3GNT8   | 0.553667483 | 0           |
| RP4-758J18.10 | MTMR11   | 0.554024487 | 0           |
| RP4-758J18.10 | MYO1G    | 0.494367222 | 0           |
| RP4-758J18.10 | TMSB10   | 0.600210628 | 0           |
| RP4-758J18.10 | UNC5CL   | 0.587260331 | 0           |
| RP4-758J18.10 | ABR      | 0.406728895 | 0           |
| RP4-758J18.10 | PLP2     | 0.547467073 | 0           |
| RP4-758J18.10 | SRCIN1   | 0.312354865 | 2.78E-11    |
| RP4-758J18.10 | PDE9A    | 0.500062976 | 0           |
| RP4-758J18.10 | TREM2    | 0.357847423 | 1.34E-14    |
| RP4-758J18.10 | KDELR3   | 0.35760403  | 1.41E-14    |
| RP4-758J18.10 | PC       | 0.395870554 | 0           |
| RP4-758J18.10 | C2CD4A   | 0.359375151 | 1.00E-14    |
| RP4-758J18.10 | PELI1    | 0.477108905 | 0           |
| RP4-758J18.10 | SSX1     | 0.322317647 | 5.96E-12    |
| RP4-758J18.10 | MROH6    | 0.603574012 | 0           |

|               |          |             |          |
|---------------|----------|-------------|----------|
| RP4-758J18.10 | ESPN     | 0.635860824 | 0        |
| RP4-758J18.10 | BMP1     | 0.5931843   | 0        |
| RP4-758J18.10 | TM4SF4   | 0.475131182 | 4.19E-26 |
| RP4-758J18.10 | CORO2A   | 0.448045059 | 0        |
| RP4-758J18.10 | CD164L2  | 0.525395106 | 1.61E-32 |
| RP4-758J18.10 | CTSS     | 0.278273388 | 3.51E-09 |
| RP4-758J18.10 | CLU      | 0.620490076 | 0        |
| RP4-758J18.10 | TMSB4X   | 0.545574965 | 0        |
| RP4-758J18.10 | WNT10A   | 0.50552273  | 7.42E-30 |
| RP4-758J18.10 | NAPSA    | 0.574740367 | 0        |
| RP4-758J18.10 | PLEKHA4  | 0.535920395 | 0        |
| RP4-758J18.10 | SFTPA1   | 0.308058368 | 4.19E-11 |
| RP4-758J18.10 | C1orf116 | 0.435128519 | 0        |
| RP4-758J18.10 | TM4SF1   | 0.411653764 | 0        |
| RP4-758J18.10 | SEL1L3   | 0.307973516 | 5.36E-11 |
| RP4-758J18.10 | VASN     | 0.660416093 | 0        |
| RP4-758J18.10 | NPTXR    | 0.397683658 | 0        |
| RP4-758J18.10 | PDE4C    | 0.41767319  | 0        |
| RP4-758J18.10 | CDC42EP1 | 0.649533923 | 0        |
| RP4-758J18.10 | ENDOD1   | 0.382481412 | 1.12E-17 |
| RP4-758J18.10 | RYR1     | 0.554951109 | 0        |
| RP4-758J18.10 | IL1RAP   | 0.42610328  | 0        |
| RP4-758J18.10 | SLC35F2  | 0.434443532 | 1.23E-21 |
| RP4-758J18.10 | ISYNA1   | 0.719681888 | 0        |
| RP4-758J18.10 | HLA-G    | 0.327374141 | 2.67E-12 |
| RP4-758J18.10 | CDKN2B   | 0.386075565 | 0        |
| RP4-758J18.10 | ALDH1A3  | 0.353307075 | 3.15E-14 |
| RP4-758J18.10 | CLIP3    | 0.496835897 | 0        |
| RP4-758J18.10 | ULBP2    | 0.388376447 | 0        |
| RP4-758J18.10 | ETHE1    | 0.512327916 | 0        |
| RP4-758J18.10 | XPR1     | 0.403381255 | 0        |
| RP4-758J18.10 | SPTBN2   | 0.353055739 | 3.30E-14 |
| RP4-758J18.10 | IVL      | 0.497175496 | 8.68E-29 |
| RP4-758J18.10 | MARCO    | 0.348849559 | 7.07E-14 |
| RP4-758J18.10 | PLXND1   | 0.512983629 | 0        |
| RP4-758J18.10 | EMILIN2  | 0.455361585 | 0        |
| RP4-758J18.10 | PLAUR    | 0.502902555 | 0        |
| RP4-758J18.10 | CDC42EP5 | 0.682282273 | 0        |
| RP4-758J18.10 | TRPC5    | 0.399714458 | 2.85E-18 |
| RP4-758J18.10 | TMEM100  | 0.563894224 | 0        |
| RP4-758J18.10 | QSOX1    | 0.570965939 | 0        |
| RP4-758J18.10 | ARHGAP23 | 0.516613383 | 0        |
| RP4-758J18.10 | MDFI     | 0.546115223 | 0        |
| RP4-758J18.10 | FSTL3    | 0.534665562 | 0        |
| RP4-758J18.10 | INF2     | 0.529223555 | 0        |
| RP4-758J18.10 | TGFBR1   | 0.39313097  | 0        |
| RP4-758J18.10 | TGFBI    | 0.432118451 | 0        |
| RP4-758J18.10 | ERBB3    | 0.364054074 | 3.93E-15 |
| RP4-758J18.10 | CCL18    | 0.300466219 | 1.61E-10 |
| RP4-758J18.10 | CCL17    | 0.464946459 | 6.27E-25 |
| RP4-758J18.10 | C16orf45 | 0.491567073 | 0        |

|               |           |             |          |
|---------------|-----------|-------------|----------|
| RP4-758J18.10 | PRDM1     | 0.360502189 | 8.02E-15 |
| RP4-758J18.10 | TRIM47    | 0.525165737 | 0        |
| RP4-758J18.10 | CNFN      | 0.457965431 | 0        |
| RP4-758J18.10 | ARMCX3    | 0.328832085 | 2.11E-12 |
| RP4-758J18.10 | RAMP1     | 0.535885362 | 0        |
| RP4-758J18.10 | GABRD     | 0.359885339 | 9.05E-15 |
| RP4-758J18.10 | COL13A1   | 0.528216795 | 0        |
| RP4-758J18.10 | S100A5    | 0.464979987 | 0        |
| RP4-758J18.10 | MISP      | 0.439872545 | 0        |
| RP4-758J18.10 | HES6      | 0.348045342 | 8.17E-14 |
| RP4-758J18.10 | PSD3      | 0.297972296 | 2.31E-10 |
| RP4-758J18.10 | DOK7      | 0.497292897 | 0        |
| RP4-758J18.10 | ZMAT3     | 0.317628512 | 1.24E-11 |
| RP4-758J18.10 | MFAP2     | 0.561821558 | 0        |
| RP4-758J18.10 | TMEM79    | 0.586137122 | 0        |
| RP4-758J18.10 | SLC1A5    | 0.457807425 | 0        |
| RP4-758J18.10 | BBC3      | 0.53807632  | 0        |
| RP4-758J18.10 | HLA-DQB2  | 0.40399229  | 0        |
| RP4-758J18.10 | C1QL1     | 0.531617766 | 0        |
| RP4-758J18.10 | TMEM215   | 0.33977339  | 2.52E-13 |
| RP4-758J18.10 | PNP       | 0.362156861 | 5.78E-15 |
| RP4-758J18.10 | ARNTL     | 0.469402469 | 0        |
| RP4-758J18.10 | CLDN2     | 0.443519406 | 1.40E-22 |
| RP4-758J18.10 | MVP       | 0.609775557 | 0        |
| RP4-758J18.10 | LGALS1    | 0.604736084 | 0        |
| RP4-758J18.10 | BIRC7     | 0.560315786 | 1.19E-37 |
| RP4-758J18.10 | COL8A1    | 0.383558665 | 0        |
| RP4-758J18.10 | PERP      | 0.362857536 | 5.02E-15 |
| RP4-758J18.10 | GJA4      | 0.476735023 | 0        |
| RP4-758J18.10 | IGFL2     | 0.532457672 | 1.64E-33 |
| RP4-758J18.10 | DAPK2     | 0.393602011 | 0        |
| RP4-758J18.10 | MAMLD1    | 0.463480485 | 0        |
| RP4-758J18.10 | ETV5      | 0.358362717 | 1.22E-14 |
| RP4-758J18.10 | RUNX1     | 0.447901661 | 0        |
| RP4-758J18.10 | LONRF2    | 0.266844436 | 1.55E-08 |
| RP4-758J18.10 | SPOCK1    | 0.369011991 | 1.36E-15 |
| RP4-758J18.10 | XKRX      | 0.401817501 | 0        |
| RP4-758J18.10 | TGFB1     | 0.523359583 | 0        |
| RP4-758J18.10 | ERP27     | 0.333803902 | 9.35E-13 |
| RP4-758J18.10 | TNFRSF10C | 0.303742656 | 1.00E-10 |
| RP4-758J18.10 | PALM      | 0.566021781 | 0        |
| RP4-758J18.10 | TSC22D1   | 0.549674909 | 0        |
| RP4-758J18.10 | TGM2      | 0.402907378 | 0        |
| RP4-758J18.10 | UBE2QL1   | 0.362481526 | 5.41E-15 |
| RP4-758J18.10 | ECE1      | 0.565923913 | 0        |
| RP4-758J18.10 | COL8A2    | 0.60067245  | 0        |
| RP4-758J18.10 | HIST3H2A  | 0.336842053 | 5.64E-13 |
| RP4-758J18.10 | TNFRSF21  | 0.335200005 | 7.42E-13 |
| RP4-758J18.10 | SOX4      | 0.45625672  | 0        |
| RP4-758J18.10 | ELF3      | 0.483513703 | 0        |
| RP4-758J18.10 | TPD52L1   | 0.386409308 | 0        |

|               |            |             |          |
|---------------|------------|-------------|----------|
| RP4-758J18.10 | INHBB      | 0.486603483 | 0        |
| RP4-758J18.10 | HPN        | 0.511134924 | 0        |
| RP4-758J18.10 | MMP7       | 0.375178254 | 4.03E-16 |
| RP4-758J18.10 | RAB27A     | 0.402538885 | 0        |
| RP4-758J18.10 | IGF2BP2    | 0.449375066 | 0        |
| RP4-758J18.10 | ITGB4      | 0.591800112 | 0        |
| RP4-758J18.10 | PPP1R1B    | 0.640909375 | 0        |
| RP4-758J18.10 | NPDC1      | 0.648298096 | 0        |
| RP4-758J18.10 | CCL13      | 0.448013588 | 4.64E-23 |
| RP4-758J18.10 | SPINT1     | 0.499102455 | 0        |
| RP4-758J18.10 | HEY2       | 0.515989867 | 0        |
| RP4-758J18.10 | CST2       | 0.382852679 | 8.96E-17 |
| RP4-758J18.10 | ADM        | 0.310863306 | 3.48E-11 |
| RP4-758J18.10 | VSTM2L     | 0.356204949 | 1.84E-14 |
| RP4-758J18.10 | FAM84A     | 0.46290647  | 0        |
| RP4-758J18.10 | P4HA2      | 0.376424399 | 2.08E-16 |
| RP4-758J18.10 | LPL        | 0.45810046  | 0        |
| RP4-758J18.10 | TMEM173    | 0.689228321 | 0        |
| RP4-758J18.10 | DHRS3      | 0.559262107 | 0        |
| RP4-758J18.10 | SCN1B      | 0.636023653 | 0        |
| RP4-758J18.10 | GLT1D1     | 0.373247957 | 4.96E-16 |
| RP4-758J18.10 | PHYHIP     | 0.632069801 | 0        |
| RP4-758J18.10 | BHLHE40    | 0.43260013  | 0        |
| RP4-758J18.10 | BID        | 0.534883566 | 0        |
| RP4-758J18.10 | POSTN      | 0.243299614 | 2.68E-07 |
| RP4-758J18.10 | ITGA3      | 0.42325051  | 0        |
| RP4-758J18.10 | RSPO4      | 0.435969755 | 0        |
| RP4-758J18.10 | ADAMTS9    | 0.416695081 | 0        |
| RP4-758J18.10 | ABTB2      | 0.411961267 | 0        |
| RP4-758J18.10 | KCNQ3      | 0.423603684 | 0        |
| RP4-758J18.10 | ANXA1      | 0.422314527 | 0        |
| RP4-758J18.10 | S100A11    | 0.592052298 | 0        |
| RP4-758J18.10 | CEACAM6    | 0.378443501 | 2.14E-16 |
| RP4-758J18.10 | IER5L      | 0.599905111 | 0        |
| RP4-758J18.10 | KRT80      | 0.363238794 | 4.64E-15 |
| RP4-758J18.10 | CDH6       | 0.469117943 | 0        |
| RP4-758J18.10 | UNC5B      | 0.370980123 | 8.64E-16 |
| RP4-758J18.10 | PLEKHN1    | 0.642145769 | 0        |
| RP4-758J18.10 | SYTL1      | 0.648785307 | 0        |
| RP4-758J18.10 | TMEM163    | 0.487586414 | 0        |
| RP4-758J18.10 | C4orf48    | 0.544717276 | 0        |
| RP4-758J18.10 | B3GNT7     | 0.504614104 | 0        |
| RP4-758J18.10 | BAIAP3     | 0.607806148 | 0        |
| RP4-758J18.10 | PHLDA2     | 0.533897372 | 0        |
| RP4-758J18.10 | GAP43      | 0.537269579 | 3.37E-34 |
| RP4-758J18.10 | S100A1     | 0.337848387 | 4.76E-13 |
| RP4-758J18.10 | PTPRE      | 0.433101808 | 0        |
| RP4-758J18.10 | CCND1      | 0.392001662 | 0        |
| RP4-758J18.10 | ST6GALNAC5 | 0.436058287 | 8.41E-22 |
| RP4-758J18.10 | KRT17      | 0.49457785  | 0        |
| RP4-758J18.10 | HPCAL4     | 0.462630171 | 0        |

|               |         |             |          |
|---------------|---------|-------------|----------|
| RP4-758J18.10 | GABBR2  | 0.447614299 | 0        |
| RP4-758J18.10 | DIRAS3  | 0.510594383 | 0        |
| RP4-758J18.10 | SERINC2 | 0.392908994 | 0        |
| RP4-758J18.10 | PTCHD4  | 0.434589963 | 0        |
| RP4-758J18.10 | EPS8    | 0.302422011 | 1.21E-10 |
| RP4-758J18.10 | LY6E    | 0.57578982  | 0        |
| RP4-758J18.10 | UPP1    | 0.547502248 | 0        |
| RP4-758J18.10 | AHNAK2  | 0.409769174 | 0        |
| RP4-758J18.10 | PLXNC1  | 0.430054579 | 0        |
| RP4-758J18.10 | TNC     | 0.354386881 | 2.58E-14 |
| RP4-758J18.10 | DUSP4   | 0.507146322 | 0        |
| RP4-758J18.10 | NRCAM   | 0.300659401 | 1.57E-10 |
| RP4-758J18.10 | NRP2    | 0.519304601 | 0        |
| RP4-758J18.10 | CTSC    | 0.496903837 | 0        |
| RP4-758J18.10 | AMIGO2  | 0.573085837 | 0        |
| RP4-758J18.10 | NAB2    | 0.472663872 | 0        |
| RP4-758J18.10 | TBC1D2  | 0.448799916 | 0        |
| RP4-758J18.10 | PHLDA3  | 0.578716913 | 0        |
| RP4-758J18.10 | PTP4A3  | 0.61819586  | 0        |
| RP4-758J18.10 | CRABP2  | 0.441469489 | 0        |
| RP4-758J18.10 | GOS2    | 0.524626614 | 0        |
| RP4-758J18.10 | S100A6  | 0.526634318 | 0        |
| RP4-758J18.10 | FOXQ1   | 0.428352959 | 0        |
| RP4-758J18.10 | LRG1    | 0.561209247 | 0        |
| RP4-758J18.10 | LAMP5   | 0.525289986 | 0        |
| RP4-758J18.10 | ALDH3B1 | 0.514580006 | 0        |
| RP4-758J18.10 | CDH2    | 0.259455005 | 3.91E-08 |
| RP4-758J18.10 | SCG5    | 0.443676192 | 0        |
| RP4-758J18.10 | ZCCHC16 | 0.415099352 | 1.03E-19 |
| RP4-758J18.10 | GRB7    | 0.595832967 | 0        |
| RP4-758J18.10 | TIAM1   | 0.467945659 | 0        |
| RP4-758J18.10 | FXD5    | 0.627506049 | 0        |
| RP4-758J18.10 | CLDN9   | 0.478015954 | 0        |
| RP4-758J18.10 | FAM43A  | 0.45369585  | 0        |
| RP4-758J18.10 | CHST2   | 0.492312711 | 0        |
| RP4-758J18.10 | HMGA2   | 0.553091766 | 0        |
| RP4-758J18.10 | GALNT7  | 0.369410695 | 1.24E-15 |
| RP4-758J18.10 | CBLN1   | 0.407993232 | 0        |
| RP4-758J18.10 | STRA6   | 0.58772045  | 0        |
| RP4-758J18.10 | MUC21   | 0.393460563 | 1.05E-17 |
| RP4-758J18.10 | PRR36   | 0.629314898 | 0        |
| RP4-758J18.10 | NFE2L3  | 0.474637393 | 0        |
| RP4-758J18.10 | NR1D1   | 0.303299557 | 1.07E-10 |
| RP4-758J18.10 | MUC1    | 0.390453368 | 0        |
| RP4-758J18.10 | NAT8L   | 0.481641453 | 0        |
| RP4-758J18.10 | APOC1   | 0.513259219 | 0        |
| RP4-758J18.10 | EVA1A   | 0.531530536 | 0        |
| RP4-758J18.10 | ENTPD1  | 0.294775713 | 3.64E-10 |
| RP4-758J18.10 | COL1A1  | 0.450413313 | 0        |
| RP4-758J18.10 | FNDC4   | 0.50220117  | 0        |
| RP4-758J18.10 | FRMD3   | 0.283935243 | 1.64E-09 |

|               |           |             |          |
|---------------|-----------|-------------|----------|
| RP4-758J18.10 | SHROOM4   | 0.447968609 | 0        |
| RP4-758J18.10 | NELL2     | 0.524842348 | 0        |
| RP4-758J18.10 | EPHB3     | 0.554443757 | 0        |
| RP4-758J18.10 | TMC6      | 0.594472749 | 0        |
| RP4-758J18.10 | NOD1      | 0.569824434 | 0        |
| RP4-758J18.10 | GGCT      | 0.532181427 | 0        |
| RP4-758J18.10 | ICAM1     | 0.459236292 | 0        |
| RP4-758J18.10 | PRSS23    | 0.523040165 | 0        |
| RP4-758J18.10 | CFI       | 0.583069611 | 0        |
| RP4-758J18.10 | CD55      | 0.413908265 | 0        |
| RP4-758J18.10 | RASD2     | 0.566389422 | 0        |
| RP4-758J18.10 | KLK11     | 0.481677573 | 7.00E-27 |
| RP4-758J18.10 | ICAM5     | 0.605568668 | 0        |
| RP4-758J18.10 | ADORA1    | 0.446584278 | 0        |
| RP4-758J18.10 | ITGA2     | 0.354996638 | 2.30E-14 |
| RP4-758J18.10 | ABCC3     | 0.407861039 | 0        |
| RP4-758J18.10 | MFGE8     | 0.555666535 | 0        |
| RP4-758J18.10 | STK32A    | 0.332578429 | 1.14E-12 |
| RP4-758J18.10 | CYSLTR2   | 0.481699322 | 0        |
| RP4-758J18.10 | LAD1      | 0.445469438 | 0        |
| RP4-758J18.10 | MGAT3     | 0.438082277 | 0        |
| RP4-758J18.10 | IGFBP6    | 0.697618129 | 0        |
| RP4-758J18.10 | CYP2S1    | 0.448382773 | 0        |
| RP4-758J18.10 | KCNJ2     | 0.574212591 | 0        |
| RP4-758J18.10 | FAM20A    | 0.638010365 | 0        |
| RP4-758J18.10 | TGFA      | 0.395466885 | 0        |
| RP4-758J18.10 | MXRA8     | 0.669927266 | 0        |
| RP4-758J18.10 | C8orf4    | 0.477020115 | 0        |
| RP4-758J18.10 | CLDN10    | 0.600052906 | 2.77E-44 |
| RP4-758J18.10 | PDE5A     | 0.374734126 | 3.36E-16 |
| RP4-758J18.10 | APOE      | 0.531130272 | 0        |
| RP4-758J18.10 | SPOCK2    | 0.430098974 | 0        |
| RP4-758J18.10 | TENM1     | 0.458601713 | 0        |
| RP4-758J18.10 | SLIT1     | 0.442920341 | 0        |
| RP4-758J18.10 | CXCL14    | 0.541713733 | 0        |
| RP4-758J18.10 | ECM1      | 0.439642485 | 0        |
| RP4-758J18.10 | DUSP5     | 0.439272007 | 0        |
| RP4-758J18.10 | SEZ6L2    | 0.393150401 | 0        |
| RP4-758J18.10 | THRSP     | 0.203386645 | 1.83E-05 |
| RP4-758J18.10 | C19orf33  | 0.499040755 | 0        |
| RP4-758J18.10 | MPZL2     | 0.494433885 | 0        |
| RP4-758J18.10 | CTSH      | 0.52927717  | 0        |
| RP4-758J18.10 | CYP1B1    | 0.367619576 | 1.85E-15 |
| RP4-758J18.10 | ALOX5     | 0.433506611 | 0        |
| RP4-758J18.10 | SYTL5     | 0.466116828 | 4.62E-25 |
| RP4-758J18.10 | TNFRSF12A | 0.519856347 | 0        |
| RP4-758J18.10 | DUSP6     | 0.500536003 | 0        |
| RP4-758J18.10 | ALOX15B   | 0.387111544 | 0        |
| RP4-758J18.10 | SDC4      | 0.573020592 | 0        |
| RP4-758J18.10 | MDK       | 0.651609    | 0        |
| RP4-758J18.10 | KRT19     | 0.512501667 | 0        |

|               |          |             |          |
|---------------|----------|-------------|----------|
| RP4-758J18.10 | MET      | 0.38008011  | 5.62E-17 |
| RP4-758J18.10 | TESC     | 0.530828868 | 0        |
| RP4-758J18.10 | CXCL17   | 0.414768239 | 1.11E-19 |
| RP4-758J18.10 | NPC2     | 0.548071582 | 0        |
| RP4-758J18.10 | COMP     | 0.519683873 | 0        |
| RP4-758J18.10 | TUSC3    | 0.558883118 | 0        |
| RP4-758J18.10 | TMPRSS4  | 0.50636409  | 0        |
| RP4-758J18.10 | LGALS3   | 0.530956805 | 0        |
| RP4-758J18.10 | CRLF1    | 0.520567235 | 0        |
| RP4-758J18.10 | CTXN1    | 0.649156211 | 0        |
| RP4-758J18.10 | PCSK1N   | 0.584485429 | 0        |
| RP4-758J18.10 | NMU      | 0.364537365 | 3.04E-15 |
| RP4-758J18.10 | GALE     | 0.648455819 | 0        |
| RP4-758J18.10 | PCSK2    | 0.309755274 | 4.11E-11 |
| RP4-758J18.10 | GJB3     | 0.499414213 | 0        |
| RP4-758J18.10 | SLPI     | 0.470806514 | 0        |
| RP4-758J18.10 | AGR2     | 0.382463399 | 1.15E-17 |
| RP4-758J18.10 | MRC2     | 0.614126269 | 0        |
| RP4-758J18.10 | GOLT1A   | 0.576775872 | 0        |
| RP4-758J18.10 | SLC27A6  | 0.456936632 | 4.95E-24 |
| RP4-758J18.10 | KCNN4    | 0.625586709 | 0        |
| RP4-758J18.10 | ETV4     | 0.516808995 | 2.39E-31 |
| RP4-758J18.10 | SYT12    | 0.564036628 | 0        |
| RP4-758J18.10 | PVRL4    | 0.4898073   | 0        |
| RP4-758J18.10 | PLCD3    | 0.467904668 | 0        |
| RP4-758J18.10 | PLAU     | 0.535301702 | 0        |
| RP4-758J18.10 | LRRK2    | 0.37988636  | 6.13E-17 |
| RP4-758J18.10 | SFN      | 0.510857349 | 0        |
| RP4-758J18.10 | LPAR5    | 0.472863436 | 0        |
| RP4-758J18.10 | NGEF     | 0.518380532 | 0        |
| RP4-758J18.10 | DTX4     | 0.400494728 | 0        |
| RP4-758J18.10 | CST6     | 0.586669154 | 0        |
| RP4-758J18.10 | QPCT     | 0.548930832 | 0        |
| RP4-758J18.10 | TIMP1    | 0.675569121 | 0        |
| RP4-758J18.10 | CAMK2N1  | 0.576449505 | 0        |
| RP4-758J18.10 | KLHDC8A  | 0.492786589 | 0        |
| RP4-758J18.10 | PDLIM4   | 0.570096052 | 0        |
| RP4-758J18.10 | SCEL     | 0.420277178 | 0        |
| RP4-758J18.10 | LCN2     | 0.384087434 | 0        |
| RP4-758J18.10 | PROS1    | 0.376800977 | 1.85E-16 |
| RP4-758J18.10 | GABRB2   | 0.411857584 | 0        |
| RP4-758J18.10 | TMPRSS6  | 0.552724408 | 0        |
| RP4-758J18.10 | KLK7     | 0.406909553 | 6.17E-19 |
| RP4-758J18.10 | PDZK1IP1 | 0.554610558 | 0        |
| RP4-758J18.10 | CDH3     | 0.581472808 | 0        |
| RP4-758J18.10 | LRP4     | 0.512759668 | 0        |
| RP4-758J18.10 | IGSF1    | 0.37056454  | 9.53E-16 |
| RP4-758J18.10 | B3GNT3   | 0.42775625  | 0        |
| RP4-758J18.10 | CLDN1    | 0.451180369 | 0        |
| RP4-758J18.10 | GDF15    | 0.373505533 | 4.65E-16 |
| RP4-758J18.10 | ARHGAP36 | 0.377722398 | 2.46E-16 |

|               |           |              |             |
|---------------|-----------|--------------|-------------|
| RP4-758J18.10 | LAMB3     | 0.541799828  | 0           |
| RP4-758J18.10 | KLK10     | 0.49997532   | 0           |
| RP4-758J18.10 | DPP4      | 0.336742625  | 5.73E-13    |
| RP4-758J18.10 | METTL7B   | 0.466905851  | 0           |
| RP4-758J18.10 | LIPH      | 0.474112738  | 0           |
| RP4-758J18.10 | CLDN16    | 0.403807476  | 0           |
| RP4-758J18.10 | CHI3L1    | 0.462442521  | 0           |
| RP4-758J18.10 | SLC22A31  | 0.727049946  | 2.26E-73    |
| RP4-758J18.10 | TACSTD2   | 0.490131682  | 0           |
| RP4-758J18.10 | SFTPB     | 0.497167654  | 0           |
| RP4-758J18.10 | RXRG      | 0.574276702  | 0           |
| RP4-758J18.10 | DCSTAMP   | 0.367314373  | 1.81E-15    |
| RP4-758J18.10 | CITED1    | 0.430151028  | 0           |
| RP4-758J18.10 | SERPINA1  | 0.591512324  | 0           |
| RP4-758J18.10 | PRR15     | 0.611505403  | 0           |
| RP4-758J18.10 | SLC34A2   | 0.339435829  | 3.64E-13    |
| RP4-758J18.10 | FN1       | 0.37997742   | 5.89E-17    |
| RP4-758J18.10 | ZCCHC12   | 0.457388722  | 0           |
| LA16c-380H5.5 | TFF3      | -0.417485965 | 0           |
| LA16c-380H5.5 | CCL21     | -0.424635345 | 1.20E-20    |
| LA16c-380H5.5 | TPO       | -0.506678969 | 0           |
| LA16c-380H5.5 | MT1G      | -0.44916075  | 0           |
| LA16c-380H5.5 | DIO1      | -0.498810696 | 0           |
| LA16c-380H5.5 | DPT       | -0.42820638  | 5.30E-21    |
| LA16c-380H5.5 | CDH16     | -0.436094571 | 0           |
| LA16c-380H5.5 | CRABP1    | -0.180927431 | 0.000138101 |
| LA16c-380H5.5 | SLC26A7   | -0.357389573 | 1.47E-14    |
| LA16c-380H5.5 | MT1H      | -0.432638487 | 1.89E-21    |
| LA16c-380H5.5 | SLC26A4   | -0.438380135 | 0           |
| LA16c-380H5.5 | SLC5A8    | -0.433483364 | 1.55E-21    |
| LA16c-380H5.5 | PKHD1L1   | -0.451170104 | 2.12E-23    |
| LA16c-380H5.5 | TFCP2L1   | -0.436502353 | 0           |
| LA16c-380H5.5 | WSCD2     | -0.448633912 | 3.98E-23    |
| LA16c-380H5.5 | IPCEF1    | -0.504596941 | 0           |
| LA16c-380H5.5 | SLC5A5    | -0.445976134 | 7.66E-23    |
| LA16c-380H5.5 | MT1F      | -0.444558986 | 0           |
| LA16c-380H5.5 | FOSB      | -0.262008499 | 2.85E-08    |
| LA16c-380H5.5 | SEMA3D    | -0.505297422 | 7.94E-30    |
| LA16c-380H5.5 | BMP8A     | -0.462276997 | 0           |
| LA16c-380H5.5 | MATN2     | -0.382338866 | 1.31E-17    |
| LA16c-380H5.5 | PLA2R1    | -0.441798977 | 0           |
| LA16c-380H5.5 | COL23A1   | -0.364080598 | 3.91E-15    |
| LA16c-380H5.5 | HGD       | -0.498797647 | 0           |
| LA16c-380H5.5 | TCEAL2    | -0.424334713 | 0           |
| LA16c-380H5.5 | CHRDL1    | -0.465927334 | 4.85E-25    |
| LA16c-380H5.5 | TNFRSF11B | -0.513769123 | 0           |
| LA16c-380H5.5 | FAM167A   | -0.413904152 | 0           |
| LA16c-380H5.5 | KIT       | -0.428998743 | 0           |
| LA16c-380H5.5 | SLC4A4    | -0.450723369 | 0           |
| LA16c-380H5.5 | SMOC2     | -0.442448166 | 0           |
| LA16c-380H5.5 | FHL1      | -0.485925501 | 0           |



|               |            |              |             |
|---------------|------------|--------------|-------------|
| LA16c-380H5.5 | OTOS       | -0.498970404 | 0           |
| LA16c-380H5.5 | IGFBPL1    | -0.433735314 | 1.46E-21    |
| LA16c-380H5.5 | HBB        | -0.295124207 | 3.47E-10    |
| LA16c-380H5.5 | BEX1       | -0.252787525 | 8.79E-08    |
| LA16c-380H5.5 | FABP4      | -0.320867692 | 5.71E-12    |
| LA16c-380H5.5 | LMOD1      | -0.430496543 | 0           |
| LA16c-380H5.5 | SOD3       | -0.503114034 | 0           |
| LA16c-380H5.5 | TMEM171    | -0.388301699 | 0           |
| LA16c-380H5.5 | PI16       | -0.333915386 | 9.18E-13    |
| LA16c-380H5.5 | ZMAT4      | -0.550248125 | 4.13E-36    |
| LA16c-380H5.5 | MFAP4      | -0.273097042 | 6.93E-09    |
| LA16c-380H5.5 | CWH43      | -0.393843857 | 9.69E-18    |
| LA16c-380H5.5 | SPX        | -0.357050866 | 1.56E-14    |
| LA16c-380H5.5 | APOD       | -0.303850027 | 9.86E-11    |
| LA16c-380H5.5 | DPP6       | -0.440030126 | 0           |
| LA16c-380H5.5 | MMRN1      | -0.390999583 | 0           |
| LA16c-380H5.5 | WDR72      | -0.301189872 | 1.45E-10    |
| LA16c-380H5.5 | MPPED2     | -0.46232281  | 0           |
| LA16c-380H5.5 | PAPSS2     | -0.515714136 | 0           |
| LA16c-380H5.5 | DCN        | -0.346364714 | 1.10E-13    |
| LA16c-380H5.5 | SORBS2     | -0.475184885 | 0           |
| LA16c-380H5.5 | EGR2       | -0.151626021 | 0.001456722 |
| LA16c-380H5.5 | EDN3       | -0.351666161 | 3.17E-14    |
| LA16c-380H5.5 | DIO2       | -0.326041439 | 3.30E-12    |
| LA16c-380H5.5 | ITPR1      | -0.607704167 | 0           |
| LA16c-380H5.5 | CFD        | -0.343307415 | 1.88E-13    |
| LA16c-380H5.5 | CPXM1      | -0.427888584 | 0           |
| LA16c-380H5.5 | ELMO1      | -0.611337184 | 0           |
| LA16c-380H5.5 | GPC3       | -0.434570121 | 1.20E-21    |
| LA16c-380H5.5 | MYOC       | -0.144703572 | 0.002371732 |
| LA16c-380H5.5 | DEPTOR     | -0.459487628 | 0           |
| LA16c-380H5.5 | DGKI       | -0.448692545 | 0           |
| LA16c-380H5.5 | CARTPT     | -0.433199654 | 1.65E-21    |
| LA16c-380H5.5 | IYD        | -0.263219788 | 2.45E-08    |
| LA16c-380H5.5 | LYVE1      | -0.401769986 | 0           |
| LA16c-380H5.5 | CLCNKB     | -0.352419741 | 3.71E-14    |
| LA16c-380H5.5 | NCAM1      | -0.504053422 | 0           |
| LA16c-380H5.5 | HBA2       | -0.260891106 | 3.27E-08    |
| LA16c-380H5.5 | GLT8D2     | -0.486149746 | 0           |
| LA16c-380H5.5 | OGDHL      | -0.303305514 | 1.07E-10    |
| LA16c-380H5.5 | LIFR       | -0.40574412  | 0           |
| LA16c-380H5.5 | CSGALNACT1 | -0.370586099 | 9.48E-16    |
| LA16c-380H5.5 | RAP1GAP    | -0.172704295 | 0.000282865 |
| LA16c-380H5.5 | COL9A3     | -0.35478672  | 2.39E-14    |
| LA16c-380H5.5 | FBLN1      | -0.366850393 | 2.18E-15    |
| LA16c-380H5.5 | EFEMP1     | -0.501614532 | 0           |
| LA16c-380H5.5 | AOX1       | -0.534615229 | 8.11E-34    |
| LA16c-380H5.5 | GRIN2C     | -0.475759467 | 0           |
| LA16c-380H5.5 | C11orf74   | -0.364983107 | 3.24E-15    |
| LA16c-380H5.5 | PPARGC1A   | -0.400004255 | 0           |
| LA16c-380H5.5 | ANGPTL1    | -0.36874789  | 1.44E-15    |

|               |          |              |          |
|---------------|----------|--------------|----------|
| LA16c-380H5.5 | SCARA5   | -0.392883235 | 1.18E-17 |
| LA16c-380H5.5 | LTF      | -0.450636849 | 0        |
| LA16c-380H5.5 | CA4      | -0.253765086 | 7.03E-08 |
| LA16c-380H5.5 | TG       | -0.229713319 | 1.23E-06 |
| LA16c-380H5.5 | FCGBP    | -0.370087258 | 1.06E-15 |
| LA16c-380H5.5 | PBX4     | -0.404670129 | 0        |
| LA16c-380H5.5 | CYR61    | -0.250618552 | 1.14E-07 |
| LA16c-380H5.5 | FOS      | -0.315412874 | 1.74E-11 |
| LA16c-380H5.5 | KHDRBS2  | -0.438414885 | 0        |
| LA16c-380H5.5 | MUM1L1   | -0.421115719 | 0        |
| LA16c-380H5.5 | RGS16    | -0.441542252 | 0        |
| LA16c-380H5.5 | MT1M     | -0.420321573 | 0        |
| LA16c-380H5.5 | LRP2     | -0.416146597 | 0        |
| LA16c-380H5.5 | MAFB     | -0.531539897 | 0        |
| LA16c-380H5.5 | KCNK2    | -0.414071945 | 0        |
| LA16c-380H5.5 | TBC1D4   | -0.500374308 | 0        |
| LA16c-380H5.5 | MIOX     | -0.45124024  | 2.08E-23 |
| LA16c-380H5.5 | TPPP     | -0.344166239 | 1.62E-13 |
| LA16c-380H5.5 | FMOD     | -0.530965315 | 0        |
| LA16c-380H5.5 | CITED2   | -0.382388083 | 1.25E-17 |
| LA16c-380H5.5 | RGS8     | -0.428522809 | 4.92E-21 |
| LA16c-380H5.5 | ABI3BP   | -0.36781602  | 1.77E-15 |
| LA16c-380H5.5 | ADH1B    | -0.372628443 | 6.59E-16 |
| LA16c-380H5.5 | OGN      | -0.365141551 | 2.72E-15 |
| LA16c-380H5.5 | NR4A1    | -0.275713086 | 4.92E-09 |
| LA16c-380H5.5 | FOXJ1    | -0.357535116 | 1.10E-14 |
| LA16c-380H5.5 | ALDH1A1  | -0.354105901 | 2.72E-14 |
| LA16c-380H5.5 | OCA2     | -0.383480237 | 7.91E-17 |
| LA16c-380H5.5 | TMEM139  | -0.310089301 | 3.91E-11 |
| LA16c-380H5.5 | ARHGAP24 | -0.534066159 | 0        |
| LA16c-380H5.5 | SLC25A15 | -0.415183665 | 0        |
| LA16c-380H5.5 | DES      | -0.311780365 | 2.37E-11 |
| LA16c-380H5.5 | GDF10    | -0.501580543 | 2.39E-29 |
| LA16c-380H5.5 | KIAA1324 | -0.572210418 | 0        |
| LA16c-380H5.5 | JUN      | -0.27322583  | 6.82E-09 |
| LA16c-380H5.5 | C7       | -0.278392531 | 3.45E-09 |
| LA16c-380H5.5 | LGI3     | -0.45781863  | 0        |
| LA16c-380H5.5 | CDON     | -0.488681964 | 0        |
| LA16c-380H5.5 | BCL2     | -0.418642222 | 0        |
| LA16c-380H5.5 | HLF      | -0.467949205 | 0        |
| LA16c-380H5.5 | EGR1     | -0.215268342 | 5.62E-06 |
| LA16c-380H5.5 | IP6K3    | -0.339223073 | 3.77E-13 |
| LA16c-380H5.5 | SCUBE3   | -0.391349637 | 0        |
| LA16c-380H5.5 | PKNOX2   | -0.440973059 | 0        |
| LA16c-380H5.5 | SMAD9    | -0.430740787 | 0        |
| LA16c-380H5.5 | IQGAP2   | -0.458597458 | 0        |
| LA16c-380H5.5 | GNA14    | -0.474678384 | 0        |
| LA16c-380H5.5 | LAYN     | -0.4441339   | 0        |
| LA16c-380H5.5 | AVPR1A   | -0.419641322 | 0        |
| LA16c-380H5.5 | PDLIM3   | -0.513278225 | 0        |
| LA16c-380H5.5 | GPM6A    | -0.295353557 | 3.36E-10 |

|               |          |              |             |
|---------------|----------|--------------|-------------|
| LA16c-380H5.5 | SDPR     | -0.263601472 | 2.33E-08    |
| LA16c-380H5.5 | CRYAB    | -0.154589708 | 0.001170553 |
| LA16c-380H5.5 | FOXA2    | -0.448240833 | 4.39E-23    |
| LA16c-380H5.5 | C8orf88  | -0.397243963 | 0           |
| LA16c-380H5.5 | ISM1     | -0.56080572  | 0           |
| LA16c-380H5.5 | BMP2     | -0.351381919 | 4.48E-14    |
| LA16c-380H5.5 | ID4      | -0.408862693 | 0           |
| LA16c-380H5.5 | NUPR1    | -0.300611602 | 1.58E-10    |
| LA16c-380H5.5 | SERTM1   | -0.427589584 | 6.11E-21    |
| LA16c-380H5.5 | IRS1     | -0.465076152 | 0           |
| LA16c-380H5.5 | FIBIN    | -0.396359892 | 0           |
| LA16c-380H5.5 | PODN     | -0.349726396 | 6.05E-14    |
| LA16c-380H5.5 | TDRD9    | -0.299471231 | 1.86E-10    |
| LA16c-380H5.5 | EPHA3    | -0.427498957 | 0           |
| LA16c-380H5.5 | AIF1L    | -0.196428683 | 3.53E-05    |
| LA16c-380H5.5 | EBF4     | -0.464422992 | 0           |
| LA16c-380H5.5 | ADM2     | -0.477280954 | 0           |
| LA16c-380H5.5 | GSTM3    | -0.349142027 | 6.71E-14    |
| LA16c-380H5.5 | HSD17B6  | -0.341997549 | 2.35E-13    |
| LA16c-380H5.5 | AGR3     | -0.251843218 | 8.89E-08    |
| LA16c-380H5.5 | EPHB1    | -0.259741091 | 3.77E-08    |
| LA16c-380H5.5 | TMOD1    | -0.440136362 | 0           |
| LA16c-380H5.5 | WASF3    | -0.414481855 | 0           |
| LA16c-380H5.5 | SELV     | -0.505530363 | 7.41E-30    |
| LA16c-380H5.5 | ENPP1    | -0.224647889 | 2.12E-06    |
| LA16c-380H5.5 | SYNE1    | -0.529273501 | 4.63E-33    |
| LA16c-380H5.5 | PLCH1    | -0.525526996 | 0           |
| LA16c-380H5.5 | CCDC146  | -0.479677718 | 0           |
| LA16c-380H5.5 | SLC16A2  | -0.531164596 | 0           |
| LA16c-380H5.5 | IER2     | -0.321039269 | 7.29E-12    |
| LA16c-380H5.5 | KCNAB1   | -0.406159987 | 0           |
| LA16c-380H5.5 | SYNDIG1  | -0.514448381 | 0           |
| LA16c-380H5.5 | C16orf89 | -0.326547089 | 3.05E-12    |
| LA16c-380H5.5 | CTGF     | -0.23531546  | 6.63E-07    |
| LA16c-380H5.5 | NR4A3    | -0.258806667 | 4.23E-08    |
| LA16c-380H5.5 | KIAA1456 | -0.301430002 | 1.40E-10    |
| LA16c-380H5.5 | AQP4     | -0.420657727 | 0           |
| LA16c-380H5.5 | RNF150   | -0.546990216 | 0           |
| LA16c-380H5.5 | C1S      | -0.37140223  | 7.82E-16    |
| LA16c-380H5.5 | PFKFB2   | -0.302597038 | 1.18E-10    |
| LA16c-380H5.5 | PROX1    | -0.426584108 | 0           |
| LA16c-380H5.5 | TCF7L1   | -0.518776258 | 0           |
| LA16c-380H5.5 | HSPB6    | -0.293446841 | 4.40E-10    |
| LA16c-380H5.5 | FHDC1    | -0.28825929  | 9.07E-10    |
| LA16c-380H5.5 | PRR15L   | -0.278246156 | 3.52E-09    |
| LA16c-380H5.5 | SLC1A1   | -0.394514165 | 0           |
| LA16c-380H5.5 | BTBD11   | -0.380881206 | 3.79E-17    |
| LA16c-380H5.5 | TRIM58   | -0.420238882 | 0           |
| LA16c-380H5.5 | LRIG1    | -0.476461986 | 0           |
| LA16c-380H5.5 | ROR2     | -0.442908285 | 0           |
| LA16c-380H5.5 | GPR125   | -0.441023979 | 0           |

|               |          |              |             |
|---------------|----------|--------------|-------------|
| LA16c-380H5.5 | FLRT1    | -0.43474414  | 0           |
| LA16c-380H5.5 | PGF      | -0.37618668  | 2.23E-16    |
| LA16c-380H5.5 | DUSP1    | -0.302732776 | 1.16E-10    |
| LA16c-380H5.5 | PLA2G7   | -0.404775656 | 0           |
| LA16c-380H5.5 | PLSCR4   | -0.37223836  | 6.39E-16    |
| LA16c-380H5.5 | FAM46B   | -0.337265437 | 5.25E-13    |
| LA16c-380H5.5 | GLDC     | -0.469242193 | 0           |
| LA16c-380H5.5 | ZBTB16   | -0.321359395 | 6.93E-12    |
| LA16c-380H5.5 | OMD      | -0.349399591 | 4.74E-14    |
| LA16c-380H5.5 | HSD11B2  | -0.314422    | 2.03E-11    |
| LA16c-380H5.5 | FGL2     | -0.435753737 | 0           |
| LA16c-380H5.5 | CLCNKA   | -0.422280075 | 2.06E-20    |
| LA16c-380H5.5 | GATM     | -0.186047907 | 9.05E-05    |
| LA16c-380H5.5 | TNS3     | -0.45157113  | 0           |
| LA16c-380H5.5 | TOB1     | -0.415409044 | 0           |
| LA16c-380H5.5 | MARC2    | -0.35178502  | 4.16E-14    |
| LA16c-380H5.5 | LRRC2    | -0.382149088 | 1.58E-17    |
| LA16c-380H5.5 | SORD     | -0.100693442 | 0.034971949 |
| LA16c-380H5.5 | RIMS4    | -0.280723625 | 2.53E-09    |
| LA16c-380H5.5 | SLC29A4  | -0.483297401 | 0           |
| LA16c-380H5.5 | SLC39A14 | -0.345944876 | 1.18E-13    |
| LA16c-380H5.5 | FAXDC2   | -0.403953285 | 0           |
| LA16c-380H5.5 | HSPB8    | -0.334956896 | 7.72E-13    |
| LA16c-380H5.5 | CCL19    | -0.238577525 | 4.24E-07    |
| LA16c-380H5.5 | KCNIP3   | -0.39966186  | 0           |
| LA16c-380H5.5 | CGNL1    | -0.369728836 | 1.16E-15    |
| LA16c-380H5.5 | ATF3     | -0.143488115 | 0.002604536 |
| LA16c-380H5.5 | SGCD     | -0.450922934 | 0           |
| LA16c-380H5.5 | STARD13  | -0.479213768 | 0           |
| LA16c-380H5.5 | LDHD     | -0.314498024 | 2.00E-11    |
| LA16c-380H5.5 | RCAN1    | -0.333367327 | 1.00E-12    |
| LA16c-380H5.5 | ID3      | -0.464410369 | 0           |
| LA16c-380H5.5 | SYTL3    | -0.340684137 | 2.94E-13    |
| LA16c-380H5.5 | MT1E     | -0.314157615 | 2.11E-11    |
| LA16c-380H5.5 | CAMK1D   | -0.422734081 | 0           |
| LA16c-380H5.5 | PRKCQ    | -0.319044613 | 9.95E-12    |
| LA16c-380H5.5 | NUAK2    | -0.41064899  | 0           |
| LA16c-380H5.5 | LIPG     | -0.230969854 | 1.07E-06    |
| LA16c-380H5.5 | SLC25A25 | -0.279731332 | 2.89E-09    |
| LA16c-380H5.5 | PRKX     | -0.16339368  | 0.00059763  |
| LA16c-380H5.5 | SRPX     | -0.409676555 | 0           |
| LA16c-380H5.5 | FAM189A1 | -0.31278449  | 2.60E-11    |
| LA16c-380H5.5 | PLEKHH1  | -0.329128666 | 2.01E-12    |
| LA16c-380H5.5 | WNT11    | -0.414605395 | 0           |
| LA16c-380H5.5 | SNAI1    | -0.445918069 | 0           |
| LA16c-380H5.5 | FDCSP    | -0.231599284 | 9.32E-07    |
| LA16c-380H5.5 | MT1X     | -0.2208502   | 3.16E-06    |
| LA16c-380H5.5 | ACACB    | -0.460244754 | 0           |
| LA16c-380H5.5 | ARC      | -0.069557638 | 0.145620955 |
| LA16c-380H5.5 | KLK4     | -0.306791286 | 5.07E-11    |
| LA16c-380H5.5 | ZFPM2    | -0.438550056 | 0           |

|               |          |              |             |
|---------------|----------|--------------|-------------|
| LA16c-380H5.5 | AKAP12   | -0.259937677 | 3.68E-08    |
| LA16c-380H5.5 | GJB6     | -0.253611919 | 7.17E-08    |
| LA16c-380H5.5 | ERO1LB   | -0.420396605 | 0           |
| LA16c-380H5.5 | DNALI1   | -0.439138254 | 0           |
| LA16c-380H5.5 | HKDC1    | -0.407265891 | 0           |
| LA16c-380H5.5 | ZFP36L2  | -0.344560972 | 1.51E-13    |
| LA16c-380H5.5 | CAPSL    | -0.423102532 | 1.71E-20    |
| LA16c-380H5.5 | CYP7B1   | -0.434789953 | 0           |
| LA16c-380H5.5 | CPQ      | -0.414831767 | 0           |
| LA16c-380H5.5 | RPS6KA6  | -0.335961966 | 4.82E-13    |
| LA16c-380H5.5 | TLE1     | -0.492923604 | 0           |
| LA16c-380H5.5 | TP53INP2 | -0.417318456 | 0           |
| LA16c-380H5.5 | KATNAL2  | -0.386896377 | 0           |
| LA16c-380H5.5 | SGPP2    | -0.374272305 | 3.80E-16    |
| LA16c-380H5.5 | CTH      | -0.478502739 | 0           |
| LA16c-380H5.5 | KIF12    | -0.224559383 | 2.14E-06    |
| LA16c-380H5.5 | TMEM220  | -0.373148671 | 5.09E-16    |
| LA16c-380H5.5 | CENPJ    | -0.506328205 | 0           |
| LA16c-380H5.5 | FAM155B  | -0.397580259 | 0           |
| LA16c-380H5.5 | WFS1     | -0.451692826 | 0           |
| LA16c-380H5.5 | SELENBP1 | -0.358047413 | 1.29E-14    |
| LA16c-380H5.5 | SNTA1    | -0.279724808 | 2.89E-09    |
| LA16c-380H5.5 | FRAS1    | -0.27974041  | 2.89E-09    |
| LA16c-380H5.5 | FBLN7    | -0.501440214 | 0           |
| LA16c-380H5.5 | AGPAT9   | -0.264091803 | 2.19E-08    |
| LA16c-380H5.5 | GPR83    | -0.341815856 | 2.43E-13    |
| LA16c-380H5.5 | PRTG     | -0.257481058 | 4.98E-08    |
| LA16c-380H5.5 | EGR3     | -0.17626157  | 0.000210404 |
| LA16c-380H5.5 | GRAMD2   | -0.433529021 | 0           |
| LA16c-380H5.5 | HYOU1    | -0.480345203 | 0           |
| LA16c-380H5.5 | FBLN5    | -0.405130107 | 0           |
| LA16c-380H5.5 | ITM2A    | -0.345769849 | 1.22E-13    |
| LA16c-380H5.5 | SRF      | -0.366326447 | 2.44E-15    |
| LA16c-380H5.5 | FGFR2    | -0.147863791 | 0.001912404 |
| LA16c-380H5.5 | MT1A     | -0.332537521 | 8.55E-13    |
| LA16c-380H5.5 | MAMDC2   | -0.349630231 | 6.15E-14    |
| LA16c-380H5.5 | FHL2     | -0.488913301 | 0           |
| LA16c-380H5.5 | FTCDNL1  | -0.261668941 | 2.97E-08    |
| LA16c-380H5.5 | PKIA     | -0.178580466 | 0.000172962 |
| LA16c-380H5.5 | DNAJB4   | -0.224587892 | 2.13E-06    |
| LA16c-380H5.5 | SLC25A33 | -0.453446926 | 0           |
| LA16c-380H5.5 | EYA2     | -0.292193142 | 5.24E-10    |
| LA16c-380H5.5 | LPAR1    | -0.412276571 | 0           |
| LA16c-380H5.5 | STX11    | -0.383370731 | 1.01E-18    |
| LA16c-380H5.5 | ARHGEF28 | -0.394318856 | 0           |
| LA16c-380H5.5 | OR2W3    | -0.421805473 | 0           |
| LA16c-380H5.5 | ALDH1B1  | -0.39170013  | 1.51E-17    |
| LA16c-380H5.5 | CXCL12   | -0.400241265 | 0           |
| LA16c-380H5.5 | OLFM2    | -0.49005665  | 0           |
| LA16c-380H5.5 | TUB      | -0.180124788 | 0.000151598 |
| LA16c-380H5.5 | HTRA3    | -0.347677984 | 8.72E-14    |

|               |          |              |             |
|---------------|----------|--------------|-------------|
| LA16c-380H5.5 | CKB      | -0.3392591   | 3.75E-13    |
| LA16c-380H5.5 | RGS2     | -0.304098384 | 9.51E-11    |
| LA16c-380H5.5 | SHANK2   | -0.447766491 | 0           |
| LA16c-380H5.5 | CNTFR    | -0.385709807 | 5.07E-17    |
| LA16c-380H5.5 | CYTH3    | -0.408529376 | 0           |
| LA16c-380H5.5 | PLAC9    | -0.278722303 | 3.30E-09    |
| LA16c-380H5.5 | WVOX     | -0.348604181 | 7.39E-14    |
| LA16c-380H5.5 | NPR3     | -0.377561791 | 1.46E-16    |
| LA16c-380H5.5 | SDC2     | -0.285544243 | 1.32E-09    |
| LA16c-380H5.5 | KLF15    | -0.306155731 | 7.02E-11    |
| LA16c-380H5.5 | TMEM164  | -0.56671196  | 0           |
| LA16c-380H5.5 | LONRF3   | -0.223652476 | 2.36E-06    |
| LA16c-380H5.5 | GBP1     | -0.309674994 | 4.16E-11    |
| LA16c-380H5.5 | ARHGAP6  | -0.275181055 | 5.28E-09    |
| LA16c-380H5.5 | TMEM119  | -0.35875433  | 1.13E-14    |
| LA16c-380H5.5 | SH3RF1   | -0.257997487 | 4.67E-08    |
| LA16c-380H5.5 | CRELD2   | -0.449702284 | 0           |
| LA16c-380H5.5 | PCP4     | -0.085353614 | 0.07402371  |
| LA16c-380H5.5 | GCSH     | -0.311472638 | 3.17E-11    |
| LA16c-380H5.5 | IMPA2    | -0.261823827 | 2.91E-08    |
| LA16c-380H5.5 | C1R      | -0.366929396 | 2.15E-15    |
| LA16c-380H5.5 | SUCNR1   | -0.359927039 | 8.98E-15    |
| LA16c-380H5.5 | SFRP1    | -0.371315426 | 7.98E-16    |
| LA16c-380H5.5 | UGT8     | -0.363655228 | 4.26E-15    |
| LA16c-380H5.5 | TLE4     | -0.434650244 | 0           |
| LA16c-380H5.5 | ANTXR1   | -0.47072666  | 0           |
| LA16c-380H5.5 | GPX3     | -0.310690265 | 3.57E-11    |
| LA16c-380H5.5 | DPY19L2  | -0.418948732 | 0           |
| LA16c-380H5.5 | FAM46C   | -0.39133517  | 0           |
| LA16c-380H5.5 | IL33     | -0.399736339 | 2.84E-18    |
| LA16c-380H5.5 | PEG3     | -0.357427869 | 1.46E-14    |
| LA16c-380H5.5 | FAHD2A   | -0.339132581 | 3.83E-13    |
| LA16c-380H5.5 | PTGDS    | -0.179705801 | 0.000157135 |
| LA16c-380H5.5 | CHCHD10  | -0.261014504 | 3.22E-08    |
| LA16c-380H5.5 | CD36     | -0.363392829 | 4.50E-15    |
| LA16c-380H5.5 | ANKRD37  | -0.396100614 | 0           |
| LA16c-380H5.5 | TSPAN33  | -0.498875232 | 0           |
| LA16c-380H5.5 | PRDM16   | -0.328941157 | 2.07E-12    |
| LA16c-380H5.5 | UST      | -0.318747181 | 1.04E-11    |
| LA16c-380H5.5 | NEXN     | -0.472001776 | 0           |
| LA16c-380H5.5 | NUPR1L   | -0.094656178 | 0.04747198  |
| LA16c-380H5.5 | SLC24A3  | -0.554109589 | 0           |
| LA16c-380H5.5 | MARC1    | -0.347088509 | 9.68E-14    |
| LA16c-380H5.5 | MYH11    | -0.306018291 | 7.16E-11    |
| LA16c-380H5.5 | APOA1    | -0.429905665 | 3.57E-21    |
| LA16c-380H5.5 | TMEM178B | -0.500109498 | 0           |
| LA16c-380H5.5 | CAPN6    | -0.410829131 | 2.64E-19    |
| LA16c-380H5.5 | PPM1L    | -0.496053665 | 0           |
| LA16c-380H5.5 | FZD8     | -0.511000888 | 0           |
| LA16c-380H5.5 | RCAN2    | -0.538340988 | 0           |
| LA16c-380H5.5 | COPZ2    | -0.397209354 | 0           |

|               |          |              |             |
|---------------|----------|--------------|-------------|
| LA16c-380H5.5 | GAS1     | -0.394279425 | 0           |
| LA16c-380H5.5 | DACT1    | -0.557266316 | 0           |
| LA16c-380H5.5 | WBSCR17  | -0.402448251 | 0           |
| LA16c-380H5.5 | NCS1     | -0.248078532 | 1.54E-07    |
| LA16c-380H5.5 | SPIRE2   | -0.362832005 | 5.04E-15    |
| LA16c-380H5.5 | C15orf52 | -0.468457975 | 0           |
| LA16c-380H5.5 | SPAG5    | -0.58807249  | 0           |
| LA16c-380H5.5 | ARL4D    | -0.456968742 | 0           |
| LA16c-380H5.5 | FAM189A2 | -0.145266044 | 0.0022996   |
| LA16c-380H5.5 | MAP1LC3A | -0.323835021 | 4.69E-12    |
| LA16c-380H5.5 | KLF6     | -0.124353294 | 0.009138662 |
| LA16c-380H5.5 | ADD3     | -0.295645175 | 3.22E-10    |
| LA16c-380H5.5 | TSPAN7   | -0.232273195 | 9.29E-07    |
| LA16c-380H5.5 | KLF9     | -0.289242788 | 7.91E-10    |
| LA16c-380H5.5 | KCNQ1    | -0.290904268 | 6.28E-10    |
| LA16c-380H5.5 | MAN1A1   | -0.457270146 | 0           |
| LA16c-380H5.5 | MLF1     | -0.13498654  | 0.004636891 |
| LA16c-380H5.5 | RARB     | -0.488713027 | 0           |
| LA16c-380H5.5 | CDC42EP2 | -0.344947336 | 1.41E-13    |
| LA16c-380H5.5 | FAM3B    | -0.222868401 | 2.56E-06    |
| LA16c-380H5.5 | GADD45B  | -0.308929498 | 4.65E-11    |
| LA16c-380H5.5 | TMEM47   | -0.357539069 | 1.42E-14    |
| LA16c-380H5.5 | SDF2L1   | -0.350274597 | 5.48E-14    |
| LA16c-380H5.5 | CCDC85A  | -0.350004822 | 5.75E-14    |
| LA16c-380H5.5 | CRYBG3   | -0.221156994 | 3.06E-06    |
| LA16c-380H5.5 | FBLN2    | -0.278781449 | 3.28E-09    |
| LA16c-380H5.5 | PEBP4    | -0.134258064 | 0.004864878 |
| LA16c-380H5.5 | CDADC1   | -0.376949197 | 1.77E-16    |
| LA16c-380H5.5 | FAM63A   | -0.388764939 | 0           |
| LA16c-380H5.5 | GLUL     | -0.417206972 | 0           |
| LA16c-380H5.5 | FREM2    | -0.318993836 | 1.00E-11    |
| LA16c-380H5.5 | ACKR3    | -0.371972699 | 6.81E-16    |
| LA16c-380H5.5 | DENND6A  | -0.450756701 | 0           |
| LA16c-380H5.5 | CLDN8    | -0.061497743 | 0.198338635 |
| LA16c-380H5.5 | UTS2R    | -0.18417177  | 0.000103996 |
| LA16c-380H5.5 | SCNN1B   | -0.203954136 | 1.73E-05    |
| LA16c-380H5.5 | TTC30A   | -0.440901999 | 0           |
| LA16c-380H5.5 | CORO2B   | -0.431195233 | 0           |
| LA16c-380H5.5 | TC2N     | -0.387628682 | 0           |
| LA16c-380H5.5 | ALDH2    | -0.514297892 | 0           |
| LA16c-380H5.5 | GPR183   | -0.249620586 | 1.28E-07    |
| LA16c-380H5.5 | C4orf47  | -0.365562796 | 2.87E-15    |
| LA16c-380H5.5 | SLC25A42 | -0.322925136 | 5.42E-12    |
| LA16c-380H5.5 | LGMN     | -0.475457354 | 0           |
| LA16c-380H5.5 | ACSF2    | -0.35647444  | 1.74E-14    |
| LA16c-380H5.5 | KIAA1467 | -0.335404959 | 7.17E-13    |
| LA16c-380H5.5 | PRKG1    | -0.450513025 | 0           |
| LA16c-380H5.5 | GNAI1    | -0.485301844 | 0           |
| LA16c-380H5.5 | ABCC4    | -0.500944919 | 0           |
| LA16c-380H5.5 | PRPS1    | -0.434067719 | 0           |
| LA16c-380H5.5 | TSPAN5   | -0.380023375 | 5.77E-17    |

|               |          |              |             |
|---------------|----------|--------------|-------------|
| LA16c-380H5.5 | CR2      | -0.296870548 | 2.21E-10    |
| LA16c-380H5.5 | CCDC170  | -0.399296772 | 0           |
| LA16c-380H5.5 | RRAD     | -0.261628234 | 2.98E-08    |
| LA16c-380H5.5 | SCGB2A1  | -0.302512219 | 1.20E-10    |
| LA16c-380H5.5 | SESN3    | -0.477823906 | 0           |
| LA16c-380H5.5 | SGK223   | -0.295876511 | 3.12E-10    |
| LA16c-380H5.5 | NDRG2    | -0.460986704 | 0           |
| LA16c-380H5.5 | C3orf52  | -0.404382342 | 0           |
| LA16c-380H5.5 | FLRT3    | 0.146143448  | 0.002161464 |
| LA16c-380H5.5 | MST1R    | 0.344466082  | 1.53E-13    |
| LA16c-380H5.5 | SDC1     | 0.192677374  | 4.99E-05    |
| LA16c-380H5.5 | ST8SIA4  | 0.231571527  | 1.00E-06    |
| LA16c-380H5.5 | UBTD1    | 0.460927133  | 0           |
| LA16c-380H5.5 | EPHA2    | 0.339905168  | 3.36E-13    |
| LA16c-380H5.5 | TMEM130  | 0.293563005  | 4.33E-10    |
| LA16c-380H5.5 | SPINK2   | 0.358673766  | 1.15E-14    |
| LA16c-380H5.5 | MMP16    | 0.257042923  | 5.25E-08    |
| LA16c-380H5.5 | SIGLEC15 | 0.406616702  | 0           |
| LA16c-380H5.5 | RIN1     | 0.417290372  | 0           |
| LA16c-380H5.5 | IL1RN    | 0.322305165  | 5.97E-12    |
| LA16c-380H5.5 | FCER1G   | 0.016176099  | 0.735276311 |
| LA16c-380H5.5 | CD276    | 0.323026833  | 5.33E-12    |
| LA16c-380H5.5 | CTSB     | 0.550880241  | 0           |
| LA16c-380H5.5 | FAM171A2 | 0.433345768  | 0           |
| LA16c-380H5.5 | ASPHD1   | 0.450124675  | 0           |
| LA16c-380H5.5 | C15orf48 | 0.15549321   | 0.001094221 |
| LA16c-380H5.5 | DYSF     | 0.209323664  | 1.02E-05    |
| LA16c-380H5.5 | PDZRN4   | 0.140245293  | 0.003257273 |
| LA16c-380H5.5 | EFHD2    | 0.130991839  | 0.006016438 |
| LA16c-380H5.5 | ASF1B    | 0.254485316  | 7.16E-08    |
| LA16c-380H5.5 | AQP1     | 0.211828224  | 7.96E-06    |
| LA16c-380H5.5 | ARRDC2   | 0.442591279  | 0           |
| LA16c-380H5.5 | PRSS1    | 0.432631233  | 1.89E-21    |
| LA16c-380H5.5 | MAPK13   | 0.308293784  | 5.11E-11    |
| LA16c-380H5.5 | CST5     | 0.351631315  | 3.19E-14    |
| LA16c-380H5.5 | AHR      | 0.2878864    | 9.55E-10    |
| LA16c-380H5.5 | BAX      | 0.25880071   | 4.23E-08    |
| LA16c-380H5.5 | C1orf115 | 0.490648252  | 0           |
| LA16c-380H5.5 | PLK3     | 0.344558418  | 1.51E-13    |
| LA16c-380H5.5 | JAG2     | 0.308770783  | 4.76E-11    |
| LA16c-380H5.5 | RAD23B   | 0.594291481  | 0           |
| LA16c-380H5.5 | CA12     | -0.043625556 | 0.361687311 |
| LA16c-380H5.5 | ADTRP    | 0.502244714  | 0           |
| LA16c-380H5.5 | UCP2     | 0.448925442  | 0           |
| LA16c-380H5.5 | IGFBP2   | 0.306870874  | 6.32E-11    |
| LA16c-380H5.5 | LOXL2    | 0.125121767  | 0.008715179 |
| LA16c-380H5.5 | GPX1     | 0.263061356  | 2.50E-08    |
| LA16c-380H5.5 | P3H3     | 0.372623022  | 5.81E-16    |
| LA16c-380H5.5 | C2orf81  | 0.459183529  | 0           |
| LA16c-380H5.5 | CDT1     | 0.423013926  | 0           |
| LA16c-380H5.5 | SNX25    | 0.181540748  | 0.000134211 |



|               |          |             |             |
|---------------|----------|-------------|-------------|
| LA16c-380H5.5 | MTHFD1L  | 0.384508549 | 0           |
| LA16c-380H5.5 | CDC42BPG | 0.46711522  | 3.55E-25    |
| LA16c-380H5.5 | MSN      | 0.526263131 | 0           |
| LA16c-380H5.5 | SIGLEC6  | 0.354509731 | 1.91E-14    |
| LA16c-380H5.5 | F2R      | 0.023658859 | 0.620918007 |
| LA16c-380H5.5 | TMEM184A | 0.450867192 | 0           |
| LA16c-380H5.5 | CKS2     | 0.180181381 | 0.000150864 |
| LA16c-380H5.5 | TAX1BP3  | 0.421389607 | 0           |
| LA16c-380H5.5 | PMEP A1  | 0.325148007 | 3.81E-12    |
| LA16c-380H5.5 | CXCL16   | 0.275454943 | 5.09E-09    |
| LA16c-380H5.5 | FAXC     | 0.363879898 | 4.07E-15    |
| LA16c-380H5.5 | VTCN1    | 0.302460506 | 9.71E-11    |
| LA16c-380H5.5 | SH2D4A   | 0.354952243 | 2.32E-14    |
| LA16c-380H5.5 | RNF24    | 0.438453465 | 0           |
| LA16c-380H5.5 | LY6G6C   | 0.49792361  | 6.98E-29    |
| LA16c-380H5.5 | NID1     | 0.114837866 | 0.016115159 |
| LA16c-380H5.5 | STAC     | 0.340149979 | 3.22E-13    |
| LA16c-380H5.5 | RAB34    | 0.54066967  | 0           |
| LA16c-380H5.5 | HES4     | 0.311841131 | 3.00E-11    |
| LA16c-380H5.5 | EPHA10   | 0.547211766 | 0           |
| LA16c-380H5.5 | ENTPD2   | 0.533377397 | 0           |
| LA16c-380H5.5 | DDB2     | 0.380972833 | 3.60E-17    |
| LA16c-380H5.5 | NKAIN4   | 0.136410726 | 0.004218838 |
| LA16c-380H5.5 | TRIM29   | 0.355311091 | 2.17E-14    |
| LA16c-380H5.5 | ADCY8    | 0.420537962 | 3.06E-20    |
| LA16c-380H5.5 | SFTA2    | 0.327669729 | 2.54E-12    |
| LA16c-380H5.5 | NRIP1    | 0.32192646  | 6.34E-12    |
| LA16c-380H5.5 | VWA1     | 0.148432274 | 0.001836068 |
| LA16c-380H5.5 | APLNR    | 0.163993935 | 0.000570152 |
| LA16c-380H5.5 | REN      | 0.459772479 | 2.40E-24    |
| LA16c-380H5.5 | EDIL3    | 0.105176488 | 0.02759793  |
| LA16c-380H5.5 | AGRN     | 0.399398043 | 0           |
| LA16c-380H5.5 | TREM1    | 0.14678129  | 0.002065854 |
| LA16c-380H5.5 | SRL      | 0.213299075 | 6.87E-06    |
| LA16c-380H5.5 | RASGRF1  | 0.399761146 | 0           |
| LA16c-380H5.5 | RMI2     | 0.40412817  | 0           |
| LA16c-380H5.5 | SAMD1    | 0.4376023   | 0           |
| LA16c-380H5.5 | MGAT4B   | 0.591293895 | 0           |
| LA16c-380H5.5 | NXN      | 0.290508685 | 6.64E-10    |
| LA16c-380H5.5 | SH3BGRL3 | 0.294159856 | 3.98E-10    |
| LA16c-380H5.5 | CA11     | 0.445400364 | 0           |
| LA16c-380H5.5 | PLD3     | 0.289691277 | 7.44E-10    |
| LA16c-380H5.5 | LURAP1L  | 0.349550093 | 6.24E-14    |
| LA16c-380H5.5 | CARNS1   | 0.495792543 | 0           |
| LA16c-380H5.5 | PDLIM7   | 0.275989952 | 4.75E-09    |
| LA16c-380H5.5 | BCL2L1   | 0.323402843 | 5.02E-12    |
| LA16c-380H5.5 | GGT6     | 0.496848379 | 0           |
| LA16c-380H5.5 | DPYSL3   | 0.043400318 | 0.364173192 |
| LA16c-380H5.5 | FYN      | 0.366346871 | 2.43E-15    |
| LA16c-380H5.5 | TK1      | 0.197552458 | 3.18E-05    |
| LA16c-380H5.5 | AK1      | 0.290868809 | 6.31E-10    |

|               |          |             |             |
|---------------|----------|-------------|-------------|
| LA16c-380H5.5 | HIGD1B   | 0.26393408  | 2.24E-08    |
| LA16c-380H5.5 | TMEM59L  | 0.247476008 | 1.65E-07    |
| LA16c-380H5.5 | MEGF9    | 0.442637376 | 0           |
| LA16c-380H5.5 | ZFP36L1  | 0.252710224 | 8.87E-08    |
| LA16c-380H5.5 | ADRA1B   | 0.336981337 | 5.51E-13    |
| LA16c-380H5.5 | EPHA4    | 0.26329638  | 2.42E-08    |
| LA16c-380H5.5 | TCERG1L  | 0.273330081 | 6.72E-09    |
| LA16c-380H5.5 | NGFR     | 0.379490209 | 7.25E-17    |
| LA16c-380H5.5 | EBI3     | 0.29589651  | 3.11E-10    |
| LA16c-380H5.5 | S100A10  | 0.144688199 | 0.002394929 |
| LA16c-380H5.5 | S100B    | 0.129346102 | 0.00668485  |
| LA16c-380H5.5 | CD44     | 0.282867351 | 1.89E-09    |
| LA16c-380H5.5 | BHLHE41  | 0.602028129 | 0           |
| LA16c-380H5.5 | FBXO2    | 0.373637725 | 4.49E-16    |
| LA16c-380H5.5 | SLC30A2  | 0.291395025 | 5.86E-10    |
| LA16c-380H5.5 | FRMD5    | 0.350933572 | 4.86E-14    |
| LA16c-380H5.5 | SAMD11   | 0.451496382 | 0           |
| LA16c-380H5.5 | SIPA1L2  | 0.33221717  | 1.21E-12    |
| LA16c-380H5.5 | S100A16  | 0.399314643 | 0           |
| LA16c-380H5.5 | PPL      | 0.480452574 | 0           |
| LA16c-380H5.5 | ARHGDIB  | 0.049312374 | 0.302464627 |
| LA16c-380H5.5 | CDC42EP3 | 0.210718916 | 8.90E-06    |
| LA16c-380H5.5 | RUNX2    | 0.29865042  | 2.10E-10    |
| LA16c-380H5.5 | LAMC2    | 0.348325755 | 7.77E-14    |
| LA16c-380H5.5 | BRINP1   | 0.499440594 | 0           |
| LA16c-380H5.5 | GPRC5B   | 0.599283439 | 0           |
| LA16c-380H5.5 | AQP5     | 0.116897199 | 0.014298617 |
| LA16c-380H5.5 | PLAG1    | 0.479163558 | 0           |
| LA16c-380H5.5 | PTPRU    | 0.35665131  | 1.69E-14    |
| LA16c-380H5.5 | ANGPTL4  | 0.293610379 | 4.30E-10    |
| LA16c-380H5.5 | PALM3    | 0.556537841 | 0           |
| LA16c-380H5.5 | ACP5     | 0.109547625 | 0.021737547 |
| LA16c-380H5.5 | DLG4     | 0.406713293 | 0           |
| LA16c-380H5.5 | ETNK2    | 0.531680174 | 0           |
| LA16c-380H5.5 | CD109    | 0.289961903 | 7.16E-10    |
| LA16c-380H5.5 | SNX22    | 0.409176721 | 0           |
| LA16c-380H5.5 | TMEM98   | 0.568990432 | 0           |
| LA16c-380H5.5 | CTHRC1   | 0.091477149 | 0.055488707 |
| LA16c-380H5.5 | S100A2   | 0.299138481 | 1.95E-10    |
| LA16c-380H5.5 | C11orf80 | 0.545980903 | 0           |
| LA16c-380H5.5 | SREBF1   | 0.212329902 | 7.57E-06    |
| LA16c-380H5.5 | PRSS22   | 0.528694786 | 0           |
| LA16c-380H5.5 | CMTM3    | 0.21774964  | 4.36E-06    |
| LA16c-380H5.5 | RDH5     | 0.627431869 | 0           |
| LA16c-380H5.5 | MYH10    | 0.227274287 | 1.60E-06    |
| LA16c-380H5.5 | EVPL     | 0.453792158 | 0           |
| LA16c-380H5.5 | SCD      | 0.212057575 | 7.78E-06    |
| LA16c-380H5.5 | CD151    | 0.453211193 | 0           |
| LA16c-380H5.5 | S100A4   | 0.242897364 | 2.81E-07    |
| LA16c-380H5.5 | BNIP1    | 0.531269556 | 0           |
| LA16c-380H5.5 | MAP3K6   | 0.418269757 | 0           |

|               |          |             |             |
|---------------|----------|-------------|-------------|
| LA16c-380H5.5 | MANEAL   | 0.463915925 | 0           |
| LA16c-380H5.5 | CD207    | 0.244339028 | 2.18E-07    |
| LA16c-380H5.5 | CD1A     | 0.210148904 | 8.99E-06    |
| LA16c-380H5.5 | C3       | 0.104736935 | 0.028256302 |
| LA16c-380H5.5 | NT5E     | 0.152410097 | 0.001375333 |
| LA16c-380H5.5 | CACNG4   | 0.350811841 | 3.69E-14    |
| LA16c-380H5.5 | FHOD1    | 0.433731139 | 0           |
| LA16c-380H5.5 | LEMD1    | 0.407607435 | 0           |
| LA16c-380H5.5 | ATP11A   | 0.048506171 | 0.310444915 |
| LA16c-380H5.5 | PPAP2C   | 0.331312249 | 1.41E-12    |
| LA16c-380H5.5 | DRAM1    | 0.261613766 | 2.99E-08    |
| LA16c-380H5.5 | CDA      | 0.217841125 | 4.32E-06    |
| LA16c-380H5.5 | CCND2    | 0.42762576  | 0           |
| LA16c-380H5.5 | LCN6     | 0.382591704 | 9.44E-17    |
| LA16c-380H5.5 | CDH4     | 0.438924364 | 0           |
| LA16c-380H5.5 | MMP11    | 0.233587175 | 8.04E-07    |
| LA16c-380H5.5 | B3GAT1   | 0.504663038 | 0           |
| LA16c-380H5.5 | SPP1     | 0.17063404  | 0.00033516  |
| LA16c-380H5.5 | HLA-DQB1 | 0.126710201 | 0.007894858 |
| LA16c-380H5.5 | SDC3     | 0.329656442 | 1.84E-12    |
| LA16c-380H5.5 | CX3CL1   | 0.221098415 | 3.08E-06    |
| LA16c-380H5.5 | SDK1     | 0.264573623 | 2.06E-08    |
| LA16c-380H5.5 | DOCK9    | 0.438489349 | 0           |
| LA16c-380H5.5 | CSF2     | 0.303995576 | 7.73E-11    |
| LA16c-380H5.5 | GRHL3    | 0.353716275 | 2.92E-14    |
| LA16c-380H5.5 | TMEM92   | 0.406058975 | 7.41E-19    |
| LA16c-380H5.5 | BASP1    | 0.327891705 | 2.45E-12    |
| LA16c-380H5.5 | HRH1     | 0.355453638 | 2.11E-14    |
| LA16c-380H5.5 | ESM1     | 0.055867093 | 0.242653351 |
| LA16c-380H5.5 | B4GALNT3 | 0.48704488  | 0           |
| LA16c-380H5.5 | LMO3     | 0.276827075 | 4.25E-09    |
| LA16c-380H5.5 | C9orf16  | 0.437040058 | 0           |
| LA16c-380H5.5 | SEMA3F   | 0.31660076  | 1.45E-11    |
| LA16c-380H5.5 | PLA2G12B | 0.400815436 | 2.26E-18    |
| LA16c-380H5.5 | KLK6     | 0.480337087 | 1.01E-26    |
| LA16c-380H5.5 | ST3GAL5  | 0.399959718 | 0           |
| LA16c-380H5.5 | FAM132B  | 0.342585748 | 2.12E-13    |
| LA16c-380H5.5 | CDKN1A   | 0.193508824 | 4.62E-05    |
| LA16c-380H5.5 | E2F1     | 0.429249228 | 0           |
| LA16c-380H5.5 | B3GNT8   | 0.332651759 | 1.13E-12    |
| LA16c-380H5.5 | MTMR11   | 0.302652213 | 1.17E-10    |
| LA16c-380H5.5 | MYO1G    | 0.098452841 | 0.039247257 |
| LA16c-380H5.5 | TMSB10   | 0.276783531 | 4.27E-09    |
| LA16c-380H5.5 | UNC5CL   | 0.362878386 | 4.99E-15    |
| LA16c-380H5.5 | ABR      | 0.237435358 | 5.23E-07    |
| LA16c-380H5.5 | PLP2     | 0.316316518 | 1.52E-11    |
| LA16c-380H5.5 | SRCIN1   | 0.517046979 | 0           |
| LA16c-380H5.5 | PDE9A    | 0.502288542 | 0           |
| LA16c-380H5.5 | TREM2    | 0.174518534 | 0.000243409 |
| LA16c-380H5.5 | KDELR3   | 0.135183835 | 0.004576828 |
| LA16c-380H5.5 | PC       | 0.642055844 | 0           |

|               |          |             |             |
|---------------|----------|-------------|-------------|
| LA16c-380H5.5 | C2CD4A   | 0.459987887 | 0           |
| LA16c-380H5.5 | PELI1    | 0.17430975  | 0.000247672 |
| LA16c-380H5.5 | SSX1     | 0.277490731 | 3.89E-09    |
| LA16c-380H5.5 | MROH6    | 0.485804231 | 0           |
| LA16c-380H5.5 | ESPN     | 0.495880057 | 0           |
| LA16c-380H5.5 | BMP1     | 0.348390149 | 7.68E-14    |
| LA16c-380H5.5 | TM4SF4   | 0.385168932 | 5.65E-17    |
| LA16c-380H5.5 | CORO2A   | 0.387320895 | 0           |
| LA16c-380H5.5 | CD164L2  | 0.45147264  | 1.96E-23    |
| LA16c-380H5.5 | CTSS     | 0.127494277 | 0.00751595  |
| LA16c-380H5.5 | CLU      | 0.413463039 | 0           |
| LA16c-380H5.5 | TMSB4X   | 0.183168188 | 0.000116545 |
| LA16c-380H5.5 | WNT10A   | 0.393080277 | 1.13E-17    |
| LA16c-380H5.5 | NAPSA    | 0.12435613  | 0.009137066 |
| LA16c-380H5.5 | PLEKHA4  | 0.635067387 | 0           |
| LA16c-380H5.5 | SFTPA1   | 0.004871488 | 0.918932414 |
| LA16c-380H5.5 | C1orf116 | 0.3390862   | 3.86E-13    |
| LA16c-380H5.5 | TM4SF1   | 0.304838916 | 8.53E-11    |
| LA16c-380H5.5 | SEL1L3   | 0.294087945 | 4.02E-10    |
| LA16c-380H5.5 | VASN     | 0.487256076 | 0           |
| LA16c-380H5.5 | NPTXR    | 0.538907343 | 0           |
| LA16c-380H5.5 | PDE4C    | 0.415409753 | 0           |
| LA16c-380H5.5 | CDC42EP1 | 0.423102716 | 0           |
| LA16c-380H5.5 | ENDOD1   | 0.535354182 | 0           |
| LA16c-380H5.5 | RYR1     | 0.419958754 | 0           |
| LA16c-380H5.5 | IL1RAP   | 0.345539222 | 1.27E-13    |
| LA16c-380H5.5 | SLC35F2  | 0.510761627 | 1.53E-30    |
| LA16c-380H5.5 | ISYNA1   | 0.414153502 | 0           |
| LA16c-380H5.5 | HLA-G    | 0.248894238 | 1.40E-07    |
| LA16c-380H5.5 | CDKN2B   | 0.291118301 | 6.10E-10    |
| LA16c-380H5.5 | ALDH1A3  | 0.230784473 | 1.09E-06    |
| LA16c-380H5.5 | CLIP3    | 0.332743669 | 1.11E-12    |
| LA16c-380H5.5 | ULBP2    | 0.409648755 | 0           |
| LA16c-380H5.5 | ETHE1    | 0.458440444 | 0           |
| LA16c-380H5.5 | XPR1     | 0.233670858 | 7.96E-07    |
| LA16c-380H5.5 | SPTBN2   | 0.563301628 | 0           |
| LA16c-380H5.5 | IVL      | 0.245757921 | 1.84E-07    |
| LA16c-380H5.5 | MARCO    | 0.215749453 | 5.36E-06    |
| LA16c-380H5.5 | PLXND1   | 0.287684566 | 9.81E-10    |
| LA16c-380H5.5 | EMILIN2  | 0.209376569 | 1.02E-05    |
| LA16c-380H5.5 | PLAUR    | 0.124656541 | 0.00896941  |
| LA16c-380H5.5 | CDC42EP5 | 0.48619641  | 0           |
| LA16c-380H5.5 | TRPC5    | 0.39593217  | 6.29E-18    |
| LA16c-380H5.5 | TMEM100  | 0.187810091 | 7.74E-05    |
| LA16c-380H5.5 | QSOX1    | 0.399735474 | 0           |
| LA16c-380H5.5 | ARHGAP23 | 0.369677633 | 1.17E-15    |
| LA16c-380H5.5 | MDFI     | 0.145021517 | 0.002339509 |
| LA16c-380H5.5 | FSTL3    | 0.505083301 | 0           |
| LA16c-380H5.5 | INF2     | 0.594135176 | 0           |
| LA16c-380H5.5 | TGFBR1   | 0.557497936 | 0           |
| LA16c-380H5.5 | TGFBI    | 0.132043987 | 0.005621217 |

|               |           |             |             |
|---------------|-----------|-------------|-------------|
| LA16c-380H5.5 | ERBB3     | 0.538403254 | 0           |
| LA16c-380H5.5 | CCL18     | 0.141839542 | 0.002919774 |
| LA16c-380H5.5 | CCL17     | 0.161101953 | 0.000704061 |
| LA16c-380H5.5 | C16orf45  | 0.438912308 | 0           |
| LA16c-380H5.5 | PRDM1     | 0.307284188 | 5.94E-11    |
| LA16c-380H5.5 | TRIM47    | 0.429922954 | 0           |
| LA16c-380H5.5 | CNFN      | 0.425050565 | 0           |
| LA16c-380H5.5 | ARMCX3    | 0.572137939 | 0           |
| LA16c-380H5.5 | RAMP1     | 0.43303869  | 0           |
| LA16c-380H5.5 | GABRD     | 0.242038682 | 3.10E-07    |
| LA16c-380H5.5 | COL13A1   | 0.252492504 | 9.11E-08    |
| LA16c-380H5.5 | S100A5    | 0.508909216 | 0           |
| LA16c-380H5.5 | MISP      | 0.329479571 | 1.90E-12    |
| LA16c-380H5.5 | HES6      | 0.403853289 | 0           |
| LA16c-380H5.5 | PSD3      | 0.375711668 | 2.56E-16    |
| LA16c-380H5.5 | DOK7      | 0.515620098 | 0           |
| LA16c-380H5.5 | ZMAT3     | 0.324165501 | 4.45E-12    |
| LA16c-380H5.5 | MFAP2     | 0.321800083 | 6.47E-12    |
| LA16c-380H5.5 | TMEM79    | 0.510771112 | 0           |
| LA16c-380H5.5 | SLC1A5    | 0.263356093 | 2.41E-08    |
| LA16c-380H5.5 | BBC3      | 0.354964016 | 2.32E-14    |
| LA16c-380H5.5 | HLA-DQB2  | 0.123801973 | 0.009453668 |
| LA16c-380H5.5 | C1QL1     | 0.584044457 | 0           |
| LA16c-380H5.5 | TMEM215   | 0.344110258 | 1.20E-13    |
| LA16c-380H5.5 | PNP       | 0.369022203 | 1.36E-15    |
| LA16c-380H5.5 | ARNTL     | 0.408205845 | 0           |
| LA16c-380H5.5 | CLDN2     | 0.434947124 | 1.09E-21    |
| LA16c-380H5.5 | MVP       | 0.338306096 | 4.41E-13    |
| LA16c-380H5.5 | LGALS1    | 0.228232539 | 1.44E-06    |
| LA16c-380H5.5 | BIRC7     | 0.410896645 | 2.60E-19    |
| LA16c-380H5.5 | COL8A1    | 0.388914577 | 0           |
| LA16c-380H5.5 | PERP      | 0.451180794 | 0           |
| LA16c-380H5.5 | GJA4      | 0.295252428 | 3.41E-10    |
| LA16c-380H5.5 | IGFL2     | 0.28949555  | 6.36E-10    |
| LA16c-380H5.5 | DAPK2     | 0.622523736 | 0           |
| LA16c-380H5.5 | MAMLD1    | 0.473211363 | 0           |
| LA16c-380H5.5 | ETV5      | 0.311326688 | 3.24E-11    |
| LA16c-380H5.5 | RUNX1     | 0.279689916 | 2.90E-09    |
| LA16c-380H5.5 | LONRF2    | 0.454870971 | 0           |
| LA16c-380H5.5 | SPOCK1    | 0.111838011 | 0.019122597 |
| LA16c-380H5.5 | XKRX      | 0.304650272 | 8.77E-11    |
| LA16c-380H5.5 | TGFB1     | 0.16175844  | 0.00067885  |
| LA16c-380H5.5 | ERP27     | 0.326724243 | 2.96E-12    |
| LA16c-380H5.5 | TNFRSF10C | 0.272585577 | 7.41E-09    |
| LA16c-380H5.5 | PALM      | 0.588044548 | 0           |
| LA16c-380H5.5 | TSC22D1   | 0.401810551 | 0           |
| LA16c-380H5.5 | TGM2      | 0.196284718 | 3.58E-05    |
| LA16c-380H5.5 | UBE2QL1   | 0.428470967 | 0           |
| LA16c-380H5.5 | ECE1      | 0.443435778 | 0           |
| LA16c-380H5.5 | COL8A2    | 0.305059898 | 8.25E-11    |
| LA16c-380H5.5 | HIST3H2A  | 0.362102395 | 5.84E-15    |

|               |          |             |             |
|---------------|----------|-------------|-------------|
| LA16c-380H5.5 | TNFRSF21 | 0.320270795 | 8.22E-12    |
| LA16c-380H5.5 | SOX4     | 0.310152844 | 3.87E-11    |
| LA16c-380H5.5 | ELF3     | 0.398629144 | 0           |
| LA16c-380H5.5 | TPD52L1  | 0.642452563 | 0           |
| LA16c-380H5.5 | INHBB    | 0.49016785  | 0           |
| LA16c-380H5.5 | HPN      | 0.414120454 | 0           |
| LA16c-380H5.5 | MMP7     | 0.254054919 | 6.79E-08    |
| LA16c-380H5.5 | RAB27A   | 0.490385286 | 0           |
| LA16c-380H5.5 | IGF2BP2  | 0.474191032 | 0           |
| LA16c-380H5.5 | ITGB4    | 0.222826133 | 2.57E-06    |
| LA16c-380H5.5 | PPP1R1B  | 0.393126573 | 0           |
| LA16c-380H5.5 | NPDC1    | 0.397992154 | 0           |
| LA16c-380H5.5 | CCL13    | 0.21231168  | 7.22E-06    |
| LA16c-380H5.5 | SPINT1   | 0.524208052 | 0           |
| LA16c-380H5.5 | HEY2     | 0.376697436 | 1.91E-16    |
| LA16c-380H5.5 | CST2     | 0.301598954 | 1.10E-10    |
| LA16c-380H5.5 | ADM      | 0.365050622 | 3.20E-15    |
| LA16c-380H5.5 | VSTM2L   | 0.247756846 | 1.60E-07    |
| LA16c-380H5.5 | FAM84A   | 0.230472715 | 1.13E-06    |
| LA16c-380H5.5 | P4HA2    | 0.346377054 | 1.10E-13    |
| LA16c-380H5.5 | LPL      | 0.21185035  | 7.95E-06    |
| LA16c-380H5.5 | TMEM173  | 0.154421347 | 0.001185309 |
| LA16c-380H5.5 | DHRS3    | 0.567930766 | 0           |
| LA16c-380H5.5 | SCN1B    | 0.396252379 | 0           |
| LA16c-380H5.5 | GLT1D1   | 0.331674926 | 1.33E-12    |
| LA16c-380H5.5 | PHYHIP   | 0.467522417 | 0           |
| LA16c-380H5.5 | BHLHE40  | 0.272244885 | 7.74E-09    |
| LA16c-380H5.5 | BID      | 0.576596164 | 0           |
| LA16c-380H5.5 | POSTN    | 0.074722354 | 0.117948054 |
| LA16c-380H5.5 | ITGA3    | 0.484458055 | 0           |
| LA16c-380H5.5 | RSPO4    | 0.500346224 | 0           |
| LA16c-380H5.5 | ADAMTS9  | 0.301472269 | 1.39E-10    |
| LA16c-380H5.5 | ABTB2    | 0.477904612 | 0           |
| LA16c-380H5.5 | KCNQ3    | 0.422416933 | 0           |
| LA16c-380H5.5 | ANXA1    | 0.498756088 | 0           |
| LA16c-380H5.5 | S100A11  | 0.336060814 | 6.43E-13    |
| LA16c-380H5.5 | CEACAM6  | 0.261814445 | 2.59E-08    |
| LA16c-380H5.5 | IER5L    | 0.545538229 | 0           |
| LA16c-380H5.5 | KRT80    | 0.452658595 | 0           |
| LA16c-380H5.5 | CDH6     | 0.23918194  | 4.30E-07    |
| LA16c-380H5.5 | UNC5B    | 0.269659336 | 1.08E-08    |
| LA16c-380H5.5 | PLEKHN1  | 0.486484482 | 0           |
| LA16c-380H5.5 | SYTL1    | 0.309088214 | 4.54E-11    |
| LA16c-380H5.5 | TMEM163  | 0.314653052 | 1.96E-11    |
| LA16c-380H5.5 | C4orf48  | 0.197780816 | 3.11E-05    |
| LA16c-380H5.5 | B3GNT7   | 0.341576293 | 2.53E-13    |
| LA16c-380H5.5 | BAIAP3   | 0.537842147 | 0           |
| LA16c-380H5.5 | PHLDA2   | 0.427823906 | 0           |
| LA16c-380H5.5 | GAP43    | 0.389773743 | 2.23E-17    |
| LA16c-380H5.5 | S100A1   | 0.485422973 | 0           |
| LA16c-380H5.5 | PTPRE    | 0.410918622 | 0           |

|               |            |             |             |
|---------------|------------|-------------|-------------|
| LA16c-380H5.5 | CCND1      | 0.346576761 | 1.06E-13    |
| LA16c-380H5.5 | ST6GALNAC5 | 0.379662243 | 1.68E-16    |
| LA16c-380H5.5 | KRT17      | 0.125036239 | 0.00876143  |
| LA16c-380H5.5 | HPCAL4     | 0.443828525 | 0           |
| LA16c-380H5.5 | GABBR2     | 0.252574769 | 9.02E-08    |
| LA16c-380H5.5 | DIRAS3     | 0.425451397 | 0           |
| LA16c-380H5.5 | SERINC2    | 0.437517198 | 0           |
| LA16c-380H5.5 | PTCHD4     | 0.247107515 | 1.72E-07    |
| LA16c-380H5.5 | EPS8       | 0.47741499  | 0           |
| LA16c-380H5.5 | LY6E       | 0.473406389 | 0           |
| LA16c-380H5.5 | UPP1       | 0.443102177 | 0           |
| LA16c-380H5.5 | AHNAK2     | 0.378183605 | 1.18E-16    |
| LA16c-380H5.5 | PLXNC1     | 0.426449079 | 0           |
| LA16c-380H5.5 | TNC        | 0.179424822 | 0.000160954 |
| LA16c-380H5.5 | DUSP4      | 0.229211215 | 1.30E-06    |
| LA16c-380H5.5 | NRCAM      | 0.492031448 | 0           |
| LA16c-380H5.5 | NRP2       | 0.352741712 | 3.50E-14    |
| LA16c-380H5.5 | CTSC       | 0.264057053 | 2.20E-08    |
| LA16c-380H5.5 | AMIGO2     | 0.310302624 | 3.78E-11    |
| LA16c-380H5.5 | NAB2       | 0.595926721 | 0           |
| LA16c-380H5.5 | TBC1D2     | 0.473416176 | 0           |
| LA16c-380H5.5 | PHLDA3     | 0.397398991 | 0           |
| LA16c-380H5.5 | PTP4A3     | 0.368915116 | 1.39E-15    |
| LA16c-380H5.5 | CRABP2     | 0.340399612 | 3.09E-13    |
| LA16c-380H5.5 | GOS2       | 0.29362045  | 4.29E-10    |
| LA16c-380H5.5 | S100A6     | 0.467466392 | 0           |
| LA16c-380H5.5 | FOXQ1      | 0.300221266 | 1.67E-10    |
| LA16c-380H5.5 | LRG1       | 0.433567743 | 0           |
| LA16c-380H5.5 | LAMP5      | 0.217465966 | 4.49E-06    |
| LA16c-380H5.5 | ALDH3B1    | 0.437383729 | 0           |
| LA16c-380H5.5 | CDH2       | 0.201972671 | 2.09E-05    |
| LA16c-380H5.5 | SCG5       | 0.32539764  | 3.66E-12    |
| LA16c-380H5.5 | ZCCHC16    | 0.439541245 | 3.66E-22    |
| LA16c-380H5.5 | GRB7       | 0.581683578 | 0           |
| LA16c-380H5.5 | TIAM1      | 0.292102367 | 5.31E-10    |
| LA16c-380H5.5 | FXYD5      | 0.189108469 | 6.89E-05    |
| LA16c-380H5.5 | CLDN9      | 0.73304252  | 0           |
| LA16c-380H5.5 | FAM43A     | 0.618237986 | 0           |
| LA16c-380H5.5 | CHST2      | 0.390519606 | 0           |
| LA16c-380H5.5 | HMGA2      | 0.326796296 | 2.93E-12    |
| LA16c-380H5.5 | GALNT7     | 0.442878074 | 0           |
| LA16c-380H5.5 | CBLN1      | 0.279418439 | 3.01E-09    |
| LA16c-380H5.5 | STRA6      | 0.347192192 | 9.50E-14    |
| LA16c-380H5.5 | MUC21      | 0.403849562 | 1.19E-18    |
| LA16c-380H5.5 | PRR36      | 0.415841506 | 0           |
| LA16c-380H5.5 | NFE2L3     | 0.116328858 | 0.014781017 |
| LA16c-380H5.5 | NR1D1      | 0.311685252 | 3.07E-11    |
| LA16c-380H5.5 | MUC1       | 0.338115325 | 4.55E-13    |
| LA16c-380H5.5 | NAT8L      | 0.377397402 | 1.54E-16    |
| LA16c-380H5.5 | APOC1      | 0.186171305 | 8.95E-05    |
| LA16c-380H5.5 | EVA1A      | 0.42666921  | 0           |

|               |           |             |             |
|---------------|-----------|-------------|-------------|
| LA16c-380H5.5 | ENTPD1    | 0.392241509 | 0           |
| LA16c-380H5.5 | COL1A1    | 0.131357211 | 0.005876448 |
| LA16c-380H5.5 | FNDC4     | 0.285490629 | 1.33E-09    |
| LA16c-380H5.5 | FRMD3     | 0.340216784 | 3.19E-13    |
| LA16c-380H5.5 | SHROOM4   | 0.415789309 | 0           |
| LA16c-380H5.5 | NELL2     | 0.314490223 | 2.01E-11    |
| LA16c-380H5.5 | EPHB3     | 0.405330949 | 0           |
| LA16c-380H5.5 | TMC6      | 0.454672824 | 0           |
| LA16c-380H5.5 | NOD1      | 0.495807153 | 0           |
| LA16c-380H5.5 | GGCT      | 0.641124542 | 0           |
| LA16c-380H5.5 | ICAM1     | 0.276942247 | 4.18E-09    |
| LA16c-380H5.5 | PRSS23    | 0.245451851 | 2.09E-07    |
| LA16c-380H5.5 | CFI       | 0.23204966  | 9.52E-07    |
| LA16c-380H5.5 | CD55      | 0.378795633 | 9.50E-17    |
| LA16c-380H5.5 | RASD2     | 0.509323806 | 0           |
| LA16c-380H5.5 | KLK11     | 0.3977744   | 4.29E-18    |
| LA16c-380H5.5 | ICAM5     | 0.479600842 | 0           |
| LA16c-380H5.5 | ADORA1    | 0.467166122 | 0           |
| LA16c-380H5.5 | ITGA2     | 0.333848864 | 9.28E-13    |
| LA16c-380H5.5 | ABCC3     | 0.414431644 | 0           |
| LA16c-380H5.5 | MFGE8     | 0.442001946 | 0           |
| LA16c-380H5.5 | STK32A    | 0.307336526 | 5.89E-11    |
| LA16c-380H5.5 | CYSLTR2   | 0.317663262 | 1.23E-11    |
| LA16c-380H5.5 | LAD1      | 0.628368845 | 0           |
| LA16c-380H5.5 | MGAT3     | 0.409610459 | 0           |
| LA16c-380H5.5 | IGFBP6    | 0.370284554 | 1.02E-15    |
| LA16c-380H5.5 | CYP2S1    | 0.343996034 | 1.66E-13    |
| LA16c-380H5.5 | KCNJ2     | 0.214722127 | 5.95E-06    |
| LA16c-380H5.5 | FAM20A    | 0.13656462  | 0.00417577  |
| LA16c-380H5.5 | TGFA      | 0.442542771 | 0           |
| LA16c-380H5.5 | MXRA8     | 0.493664703 | 0           |
| LA16c-380H5.5 | C8orf4    | 0.145476247 | 0.002265791 |
| LA16c-380H5.5 | CLDN10    | 0.339679725 | 2.57E-13    |
| LA16c-380H5.5 | PDE5A     | 0.560454673 | 0           |
| LA16c-380H5.5 | APOE      | 0.275046593 | 5.37E-09    |
| LA16c-380H5.5 | SPOCK2    | 0.344261837 | 1.59E-13    |
| LA16c-380H5.5 | TENM1     | 0.277107771 | 4.09E-09    |
| LA16c-380H5.5 | SLIT1     | 0.127188051 | 0.007661956 |
| LA16c-380H5.5 | CXCL14    | 0.070363557 | 0.141002974 |
| LA16c-380H5.5 | ECM1      | 0.054615097 | 0.253384767 |
| LA16c-380H5.5 | DUSP5     | 0.460479495 | 0           |
| LA16c-380H5.5 | SEZ6L2    | 0.35591702  | 1.94E-14    |
| LA16c-380H5.5 | THRSP     | 0.361763262 | 6.25E-15    |
| LA16c-380H5.5 | C19orf33  | 0.35636636  | 1.78E-14    |
| LA16c-380H5.5 | MPZL2     | 0.384818888 | 0           |
| LA16c-380H5.5 | CTSH      | 0.558608237 | 0           |
| LA16c-380H5.5 | CYP1B1    | 0.495822613 | 0           |
| LA16c-380H5.5 | ALOX5     | 0.210119228 | 9.45E-06    |
| LA16c-380H5.5 | SYTL5     | 0.399479046 | 3.00E-18    |
| LA16c-380H5.5 | TNFRSF12A | 0.60897829  | 0           |
| LA16c-380H5.5 | DUSP6     | 0.418708601 | 0           |



|               |          |             |             |
|---------------|----------|-------------|-------------|
| LA16c-380H5.5 | ALOX15B  | 0.376271215 | 2.18E-16    |
| LA16c-380H5.5 | SDC4     | 0.57386041  | 0           |
| LA16c-380H5.5 | MDK      | 0.348843318 | 7.08E-14    |
| LA16c-380H5.5 | KRT19    | 0.434630528 | 0           |
| LA16c-380H5.5 | MET      | 0.464607239 | 0           |
| LA16c-380H5.5 | TESC     | 0.401409436 | 0           |
| LA16c-380H5.5 | CXCL17   | 0.496351541 | 1.10E-28    |
| LA16c-380H5.5 | NPC2     | 0.572683729 | 0           |
| LA16c-380H5.5 | COMP     | 0.253055314 | 8.51E-08    |
| LA16c-380H5.5 | TUSC3    | 0.318818667 | 1.03E-11    |
| LA16c-380H5.5 | TMPRSS4  | 0.364098185 | 3.89E-15    |
| LA16c-380H5.5 | LGALS3   | 0.515027077 | 0           |
| LA16c-380H5.5 | CRLF1    | 0.335752035 | 6.77E-13    |
| LA16c-380H5.5 | CTXN1    | 0.488894153 | 0           |
| LA16c-380H5.5 | PCSK1N   | 0.158117197 | 0.000897794 |
| LA16c-380H5.5 | NMU      | 0.409685123 | 3.38E-19    |
| LA16c-380H5.5 | GALE     | 0.545901332 | 0           |
| LA16c-380H5.5 | PCSK2    | 0.084787826 | 0.075965262 |
| LA16c-380H5.5 | GJB3     | 0.568580381 | 0           |
| LA16c-380H5.5 | SLPI     | 0.233555119 | 8.07E-07    |
| LA16c-380H5.5 | AGR2     | 0.258619868 | 4.33E-08    |
| LA16c-380H5.5 | MRC2     | 0.283683198 | 1.70E-09    |
| LA16c-380H5.5 | GOLT1A   | 0.515713143 | 0           |
| LA16c-380H5.5 | SLC27A6  | 0.349381957 | 4.76E-14    |
| LA16c-380H5.5 | KCNN4    | 0.29009679  | 7.03E-10    |
| LA16c-380H5.5 | ETV4     | 0.431458214 | 2.49E-21    |
| LA16c-380H5.5 | SYT12    | 0.55952181  | 0           |
| LA16c-380H5.5 | PVRL4    | 0.546111819 | 0           |
| LA16c-380H5.5 | PLCD3    | 0.642410579 | 0           |
| LA16c-380H5.5 | PLAU     | 0.241163405 | 3.43E-07    |
| LA16c-380H5.5 | LRRK2    | 0.173024989 | 0.000275482 |
| LA16c-380H5.5 | SFN      | 0.341581541 | 2.52E-13    |
| LA16c-380H5.5 | LPAR5    | 0.476691195 | 0           |
| LA16c-380H5.5 | NGEF     | 0.484062754 | 0           |
| LA16c-380H5.5 | DTX4     | 0.546208126 | 0           |
| LA16c-380H5.5 | CST6     | 0.522467427 | 0           |
| LA16c-380H5.5 | QPCT     | 0.473132218 | 0           |
| LA16c-380H5.5 | TIMP1    | 0.480660933 | 0           |
| LA16c-380H5.5 | CAMK2N1  | 0.488007671 | 0           |
| LA16c-380H5.5 | KLHDC8A  | 0.18011798  | 0.000151687 |
| LA16c-380H5.5 | PDLIM4   | 0.595239095 | 0           |
| LA16c-380H5.5 | SCEL     | 0.358428104 | 1.20E-14    |
| LA16c-380H5.5 | LCN2     | 0.421034163 | 0           |
| LA16c-380H5.5 | PROS1    | 0.551358942 | 0           |
| LA16c-380H5.5 | GABRB2   | 0.50557732  | 0           |
| LA16c-380H5.5 | TMPRSS6  | 0.512773568 | 0           |
| LA16c-380H5.5 | KLK7     | 0.546008653 | 1.78E-35    |
| LA16c-380H5.5 | PDZK1IP1 | 0.242174136 | 3.05E-07    |
| LA16c-380H5.5 | CDH3     | 0.390162886 | 0           |
| LA16c-380H5.5 | LRP4     | 0.278786129 | 3.28E-09    |
| LA16c-380H5.5 | IGSF1    | 0.176583682 | 0.000204784 |

|               |           |              |          |
|---------------|-----------|--------------|----------|
| LA16c-380H5.5 | B3GNT3    | 0.433368887  | 0        |
| LA16c-380H5.5 | CLDN1     | 0.345555392  | 1.27E-13 |
| LA16c-380H5.5 | GDF15     | 0.521335567  | 0        |
| LA16c-380H5.5 | ARHGAP36  | 0.198282203  | 2.86E-05 |
| LA16c-380H5.5 | LAMB3     | 0.32149329   | 6.79E-12 |
| LA16c-380H5.5 | KLK10     | 0.548400077  | 0        |
| LA16c-380H5.5 | DPP4      | 0.348990971  | 6.90E-14 |
| LA16c-380H5.5 | METTL7B   | 0.624109759  | 0        |
| LA16c-380H5.5 | LIPH      | 0.411651778  | 0        |
| LA16c-380H5.5 | CLDN16    | 0.369146027  | 1.32E-15 |
| LA16c-380H5.5 | CHI3L1    | 0.40123838   | 0        |
| LA16c-380H5.5 | SLC22A31  | 0.394138082  | 9.12E-18 |
| LA16c-380H5.5 | TACSTD2   | 0.54240987   | 0        |
| LA16c-380H5.5 | SFTPB     | 0.315649174  | 1.68E-11 |
| LA16c-380H5.5 | RXRG      | 0.450920807  | 0        |
| LA16c-380H5.5 | DCSTAMP   | 0.607093603  | 1.47E-45 |
| LA16c-380H5.5 | CITED1    | 0.578967397  | 0        |
| LA16c-380H5.5 | SERPINA1  | 0.507734237  | 0        |
| LA16c-380H5.5 | PRR15     | 0.402643702  | 0        |
| LA16c-380H5.5 | SLC34A2   | 0.550857973  | 0        |
| LA16c-380H5.5 | FN1       | 0.401360502  | 0        |
| LA16c-380H5.5 | ZCCHC12   | 0.281193531  | 2.37E-09 |
| NR2F1-AS1     | TFF3      | -0.572318924 | 0        |
| NR2F1-AS1     | CCL21     | -0.241451774 | 3.05E-07 |
| NR2F1-AS1     | TPO       | -0.614167827 | 0        |
| NR2F1-AS1     | MT1G      | -0.532471342 | 0        |
| NR2F1-AS1     | DIO1      | -0.580438958 | 0        |
| NR2F1-AS1     | DPT       | -0.192241506 | 5.03E-05 |
| NR2F1-AS1     | CDH16     | -0.508676177 | 0        |
| NR2F1-AS1     | CRABP1    | -0.531114621 | 2.55E-33 |
| NR2F1-AS1     | SLC26A7   | -0.605794614 | 0        |
| NR2F1-AS1     | MT1H      | -0.495482841 | 1.42E-28 |
| NR2F1-AS1     | SLC26A4   | -0.555475764 | 0        |
| NR2F1-AS1     | SLC5A8    | -0.594694793 | 2.46E-43 |
| NR2F1-AS1     | PKHD1L1   | -0.528322509 | 6.29E-33 |
| NR2F1-AS1     | TFCP2L1   | -0.601262067 | 0        |
| NR2F1-AS1     | WSCD2     | -0.554568806 | 9.13E-37 |
| NR2F1-AS1     | IPCEF1    | -0.503480541 | 0        |
| NR2F1-AS1     | SLC5A5    | -0.356618787 | 1.30E-14 |
| NR2F1-AS1     | MT1F      | -0.521101819 | 0        |
| NR2F1-AS1     | FOSB      | -0.356294306 | 1.80E-14 |
| NR2F1-AS1     | SEMA3D    | -0.521521037 | 5.49E-32 |
| NR2F1-AS1     | BMP8A     | -0.515752715 | 0        |
| NR2F1-AS1     | MATN2     | -0.659279694 | 0        |
| NR2F1-AS1     | PLA2R1    | -0.507314115 | 0        |
| NR2F1-AS1     | COL23A1   | -0.589240519 | 0        |
| NR2F1-AS1     | HGD       | -0.619327295 | 0        |
| NR2F1-AS1     | TCEAL2    | -0.415169623 | 0        |
| NR2F1-AS1     | CHRD1     | -0.192805389 | 4.77E-05 |
| NR2F1-AS1     | TNFRSF11B | -0.52585237  | 0        |
| NR2F1-AS1     | FAM167A   | -0.692686026 | 0        |

|           |            |              |             |
|-----------|------------|--------------|-------------|
| NR2F1-AS1 | KIT        | -0.545799352 | 0           |
| NR2F1-AS1 | SLC4A4     | -0.646762426 | 0           |
| NR2F1-AS1 | SMOC2      | -0.32493128  | 3.94E-12    |
| NR2F1-AS1 | FHL1       | -0.664173359 | 0           |
| NR2F1-AS1 | OTOS       | -0.492709004 | 0           |
| NR2F1-AS1 | IGFBPL1    | -0.598251659 | 5.80E-44    |
| NR2F1-AS1 | HBB        | -0.35200274  | 4.00E-14    |
| NR2F1-AS1 | BEX1       | -0.55823322  | 0           |
| NR2F1-AS1 | FABP4      | -0.566966213 | 1.06E-38    |
| NR2F1-AS1 | LMOD1      | -0.554578928 | 0           |
| NR2F1-AS1 | SOD3       | -0.539901764 | 0           |
| NR2F1-AS1 | TMEM171    | -0.44451686  | 0           |
| NR2F1-AS1 | PI16       | -0.232714734 | 8.85E-07    |
| NR2F1-AS1 | ZMAT4      | -0.588167577 | 3.33E-42    |
| NR2F1-AS1 | MFAP4      | -0.159640102 | 0.000799296 |
| NR2F1-AS1 | CWH43      | -0.497042217 | 9.02E-29    |
| NR2F1-AS1 | SPX        | -0.697996551 | 0           |
| NR2F1-AS1 | APOD       | -0.038215604 | 0.424306589 |
| NR2F1-AS1 | DPP6       | -0.530019687 | 0           |
| NR2F1-AS1 | MMRN1      | -0.395436674 | 0           |
| NR2F1-AS1 | WDR72      | -0.602569663 | 0           |
| NR2F1-AS1 | MPPED2     | -0.671661509 | 0           |
| NR2F1-AS1 | PAPSS2     | -0.374007637 | 4.08E-16    |
| NR2F1-AS1 | DCN        | 0.01119719   | 0.814954801 |
| NR2F1-AS1 | SORBS2     | -0.606160838 | 0           |
| NR2F1-AS1 | EGR2       | -0.378126729 | 1.21E-16    |
| NR2F1-AS1 | EDN3       | -0.518301523 | 1.50E-31    |
| NR2F1-AS1 | DIO2       | -0.645557094 | 0           |
| NR2F1-AS1 | ITPR1      | -0.61876874  | 0           |
| NR2F1-AS1 | CFD        | -0.171090614 | 0.000322906 |
| NR2F1-AS1 | CPXM1      | -0.345149312 | 1.36E-13    |
| NR2F1-AS1 | ELMO1      | -0.612757824 | 0           |
| NR2F1-AS1 | GPC3       | -0.40786616  | 5.02E-19    |
| NR2F1-AS1 | MYOC       | -0.190721509 | 5.78E-05    |
| NR2F1-AS1 | DEPTOR     | -0.621598249 | 0           |
| NR2F1-AS1 | DGKI       | -0.56411478  | 0           |
| NR2F1-AS1 | CARTPT     | -0.500604469 | 3.19E-29    |
| NR2F1-AS1 | IYD        | -0.476986216 | 0           |
| NR2F1-AS1 | LYVE1      | -0.263264467 | 2.43E-08    |
| NR2F1-AS1 | CLCNKB     | -0.624737814 | 0           |
| NR2F1-AS1 | NCAM1      | -0.398993524 | 0           |
| NR2F1-AS1 | HBA2       | -0.32004726  | 8.51E-12    |
| NR2F1-AS1 | GLT8D2     | -0.429861255 | 0           |
| NR2F1-AS1 | OGDHL      | -0.571679522 | 0           |
| NR2F1-AS1 | LIFR       | -0.57644298  | 0           |
| NR2F1-AS1 | CSGALNACT1 | -0.457163201 | 0           |
| NR2F1-AS1 | RAP1GAP    | -0.595436248 | 0           |
| NR2F1-AS1 | COL9A3     | -0.51508211  | 0           |
| NR2F1-AS1 | FBLN1      | -0.039075988 | 0.413945307 |
| NR2F1-AS1 | EFEMP1     | -0.329508364 | 1.89E-12    |
| NR2F1-AS1 | AOX1       | -0.417875961 | 5.56E-20    |

|           |          |              |             |
|-----------|----------|--------------|-------------|
| NR2F1-AS1 | GRIN2C   | -0.52749527  | 0           |
| NR2F1-AS1 | C11orf74 | -0.561863967 | 0           |
| NR2F1-AS1 | PPARGC1A | -0.584223172 | 0           |
| NR2F1-AS1 | ANGPTL1  | -0.564276475 | 0           |
| NR2F1-AS1 | SCARA5   | -0.175078338 | 0.000227493 |
| NR2F1-AS1 | LTF      | -0.445722334 | 0           |
| NR2F1-AS1 | CA4      | -0.650517014 | 3.59E-54    |
| NR2F1-AS1 | TG       | -0.679975576 | 0           |
| NR2F1-AS1 | FCGBP    | -0.577707174 | 0           |
| NR2F1-AS1 | PBX4     | -0.553105382 | 0           |
| NR2F1-AS1 | CYR61    | -0.423485534 | 0           |
| NR2F1-AS1 | FOS      | -0.390061898 | 0           |
| NR2F1-AS1 | KHDRBS2  | -0.547526644 | 0           |
| NR2F1-AS1 | MUM1L1   | -0.474304927 | 0           |
| NR2F1-AS1 | RGS16    | -0.512164945 | 0           |
| NR2F1-AS1 | MT1M     | -0.461461008 | 0           |
| NR2F1-AS1 | LRP2     | -0.553336435 | 0           |
| NR2F1-AS1 | MAFB     | -0.418184939 | 0           |
| NR2F1-AS1 | KCNK2    | -0.473967071 | 0           |
| NR2F1-AS1 | TBC1D4   | -0.495692548 | 0           |
| NR2F1-AS1 | MIOX     | -0.542611865 | 5.64E-35    |
| NR2F1-AS1 | TPPP     | -0.545266044 | 0           |
| NR2F1-AS1 | FMOD     | -0.520400151 | 0           |
| NR2F1-AS1 | CITED2   | -0.476527089 | 0           |
| NR2F1-AS1 | RGS8     | -0.574728959 | 5.93E-40    |
| NR2F1-AS1 | ABI3BP   | -0.274712283 | 5.61E-09    |
| NR2F1-AS1 | ADH1B    | -0.27530883  | 4.47E-09    |
| NR2F1-AS1 | OGN      | -0.112506516 | 0.018371543 |
| NR2F1-AS1 | NR4A1    | -0.318770442 | 1.04E-11    |
| NR2F1-AS1 | FOXJ1    | -0.558078388 | 2.64E-37    |
| NR2F1-AS1 | ALDH1A1  | -0.550884922 | 0           |
| NR2F1-AS1 | OCA2     | -0.447713572 | 5.00E-23    |
| NR2F1-AS1 | TMEM139  | -0.300488913 | 1.61E-10    |
| NR2F1-AS1 | ARHGAP24 | -0.526292349 | 0           |
| NR2F1-AS1 | SLC25A15 | -0.62229084  | 0           |
| NR2F1-AS1 | DES      | -0.204372279 | 1.59E-05    |
| NR2F1-AS1 | GDF10    | -0.382174665 | 1.03E-16    |
| NR2F1-AS1 | KIAA1324 | -0.49414936  | 0           |
| NR2F1-AS1 | JUN      | -0.398020379 | 0           |
| NR2F1-AS1 | C7       | 0.068069341  | 0.154451355 |
| NR2F1-AS1 | LGI3     | -0.620720135 | 0           |
| NR2F1-AS1 | CDON     | -0.673861119 | 0           |
| NR2F1-AS1 | BCL2     | -0.66441973  | 0           |
| NR2F1-AS1 | HLF      | -0.601468723 | 0           |
| NR2F1-AS1 | EGR1     | -0.450486218 | 0           |
| NR2F1-AS1 | IP6K3    | -0.462545352 | 0           |
| NR2F1-AS1 | SCUBE3   | -0.472660751 | 0           |
| NR2F1-AS1 | PKNOX2   | -0.606011483 | 0           |
| NR2F1-AS1 | SMAD9    | -0.495688435 | 0           |
| NR2F1-AS1 | IQGAP2   | -0.609972143 | 0           |
| NR2F1-AS1 | GNA14    | -0.645903318 | 0           |

|           |          |              |             |
|-----------|----------|--------------|-------------|
| NR2F1-AS1 | LAYN     | -0.484769671 | 0           |
| NR2F1-AS1 | AVPR1A   | -0.57112579  | 0           |
| NR2F1-AS1 | PDLIM3   | -0.392776377 | 0           |
| NR2F1-AS1 | GPM6A    | -0.537152251 | 0           |
| NR2F1-AS1 | SDPR     | -0.521914971 | 0           |
| NR2F1-AS1 | CRYAB    | -0.301658218 | 1.36E-10    |
| NR2F1-AS1 | FOXA2    | -0.360818351 | 6.05E-15    |
| NR2F1-AS1 | C8orf88  | -0.505900992 | 0           |
| NR2F1-AS1 | ISM1     | -0.371744909 | 7.20E-16    |
| NR2F1-AS1 | BMP2     | -0.279662116 | 2.92E-09    |
| NR2F1-AS1 | ID4      | -0.55052111  | 0           |
| NR2F1-AS1 | NUPR1    | -0.358916591 | 1.09E-14    |
| NR2F1-AS1 | SERTM1   | -0.500524281 | 3.26E-29    |
| NR2F1-AS1 | IRS1     | -0.579759841 | 0           |
| NR2F1-AS1 | FIBIN    | -0.19521867  | 3.95E-05    |
| NR2F1-AS1 | PODN     | -0.073448798 | 0.12435645  |
| NR2F1-AS1 | TDRD9    | -0.429558149 | 0           |
| NR2F1-AS1 | EPHA3    | -0.220034495 | 3.44E-06    |
| NR2F1-AS1 | AIF1L    | -0.478773648 | 0           |
| NR2F1-AS1 | EBF4     | -0.606351325 | 0           |
| NR2F1-AS1 | ADM2     | -0.542346043 | 0           |
| NR2F1-AS1 | GSTM3    | -0.628489974 | 0           |
| NR2F1-AS1 | HSD17B6  | -0.360576228 | 7.91E-15    |
| NR2F1-AS1 | AGR3     | -0.312285261 | 2.19E-11    |
| NR2F1-AS1 | EPHB1    | -0.490054097 | 0           |
| NR2F1-AS1 | TMOD1    | -0.305725681 | 7.48E-11    |
| NR2F1-AS1 | WASF3    | -0.61288718  | 0           |
| NR2F1-AS1 | SELV     | -0.592812443 | 5.25E-43    |
| NR2F1-AS1 | ENPP1    | -0.292793539 | 4.82E-10    |
| NR2F1-AS1 | SYNE1    | -0.615708768 | 3.68E-47    |
| NR2F1-AS1 | PLCH1    | -0.491017029 | 0           |
| NR2F1-AS1 | CCDC146  | -0.579241143 | 0           |
| NR2F1-AS1 | SLC16A2  | -0.551792396 | 0           |
| NR2F1-AS1 | IER2     | -0.474862489 | 0           |
| NR2F1-AS1 | KCNAB1   | -0.573450358 | 0           |
| NR2F1-AS1 | SYNDIG1  | -0.462022257 | 0           |
| NR2F1-AS1 | C16orf89 | -0.614959846 | 0           |
| NR2F1-AS1 | CTGF     | -0.274482365 | 5.78E-09    |
| NR2F1-AS1 | NR4A3    | -0.154225754 | 0.001202666 |
| NR2F1-AS1 | KIAA1456 | -0.597810318 | 0           |
| NR2F1-AS1 | AQP4     | -0.454743317 | 0           |
| NR2F1-AS1 | RNF150   | -0.606141548 | 0           |
| NR2F1-AS1 | C1S      | 0.094082839  | 0.048865793 |
| NR2F1-AS1 | PFKFB2   | -0.532498007 | 0           |
| NR2F1-AS1 | PROX1    | -0.514557454 | 0           |
| NR2F1-AS1 | TCF7L1   | -0.663593954 | 0           |
| NR2F1-AS1 | HSPB6    | -0.271105081 | 8.97E-09    |
| NR2F1-AS1 | FHDC1    | -0.398551985 | 0           |
| NR2F1-AS1 | PRR15L   | -0.433248751 | 0           |
| NR2F1-AS1 | SLC1A1   | -0.386381933 | 0           |
| NR2F1-AS1 | BTBD11   | -0.690735908 | 0           |

|           |          |              |             |
|-----------|----------|--------------|-------------|
| NR2F1-AS1 | TRIM58   | -0.59592431  | 0           |
| NR2F1-AS1 | LRIG1    | -0.486521785 | 0           |
| NR2F1-AS1 | ROR2     | -0.338477577 | 4.28E-13    |
| NR2F1-AS1 | GPR125   | -0.555779863 | 0           |
| NR2F1-AS1 | FLRT1    | -0.673575601 | 0           |
| NR2F1-AS1 | PGF      | -0.591648488 | 0           |
| NR2F1-AS1 | DUSP1    | -0.339782195 | 3.43E-13    |
| NR2F1-AS1 | PLA2G7   | -0.449550234 | 0           |
| NR2F1-AS1 | PLSCR4   | -0.341783233 | 2.44E-13    |
| NR2F1-AS1 | FAM46B   | -0.365839945 | 2.71E-15    |
| NR2F1-AS1 | GLDC     | -0.460433256 | 0           |
| NR2F1-AS1 | ZBTB16   | -0.469235526 | 0           |
| NR2F1-AS1 | OMD      | -0.010032908 | 0.833965279 |
| NR2F1-AS1 | HSD11B2  | -0.573632477 | 0           |
| NR2F1-AS1 | FGL2     | -0.003157153 | 0.947388221 |
| NR2F1-AS1 | CLCNKA   | -0.622196044 | 2.12E-48    |
| NR2F1-AS1 | GATM     | -0.566803729 | 0           |
| NR2F1-AS1 | TNS3     | -0.461316759 | 0           |
| NR2F1-AS1 | TOB1     | -0.365222528 | 3.08E-15    |
| NR2F1-AS1 | MARC2    | -0.651336673 | 0           |
| NR2F1-AS1 | LRRC2    | -0.555305985 | 0           |
| NR2F1-AS1 | SORD     | -0.452958439 | 0           |
| NR2F1-AS1 | RIMS4    | -0.591835571 | 0           |
| NR2F1-AS1 | SLC29A4  | -0.563510838 | 0           |
| NR2F1-AS1 | SLC39A14 | -0.640119058 | 0           |
| NR2F1-AS1 | FAXDC2   | -0.691700684 | 0           |
| NR2F1-AS1 | HSPB8    | -0.343791789 | 1.72E-13    |
| NR2F1-AS1 | CCL19    | 0.189468118  | 6.48E-05    |
| NR2F1-AS1 | KCNIP3   | -0.641133194 | 0           |
| NR2F1-AS1 | CGNL1    | -0.49568957  | 0           |
| NR2F1-AS1 | ATF3     | -0.111984954 | 0.018964614 |
| NR2F1-AS1 | SGCD     | -0.293868806 | 4.14E-10    |
| NR2F1-AS1 | STARD13  | -0.565270469 | 0           |
| NR2F1-AS1 | LDHD     | -0.647729613 | 0           |
| NR2F1-AS1 | RCAN1    | -0.430476686 | 0           |
| NR2F1-AS1 | ID3      | -0.433184499 | 0           |
| NR2F1-AS1 | SYTL3    | -0.575494515 | 0           |
| NR2F1-AS1 | MT1E     | -0.32600371  | 3.32E-12    |
| NR2F1-AS1 | CAMK1D   | -0.542459371 | 0           |
| NR2F1-AS1 | PRKCQ    | -0.613251701 | 0           |
| NR2F1-AS1 | NUAK2    | -0.409846192 | 0           |
| NR2F1-AS1 | LIPG     | -0.644278857 | 0           |
| NR2F1-AS1 | SLC25A25 | -0.351090869 | 4.72E-14    |
| NR2F1-AS1 | PRKX     | -0.357459073 | 1.45E-14    |
| NR2F1-AS1 | SRPX     | -0.086187758 | 0.071235243 |
| NR2F1-AS1 | FAM189A1 | -0.626172638 | 0           |
| NR2F1-AS1 | PLEKHH1  | -0.485046962 | 0           |
| NR2F1-AS1 | WNT11    | -0.402431939 | 0           |
| NR2F1-AS1 | SNAI1    | -0.35435057  | 2.60E-14    |
| NR2F1-AS1 | FDCSP    | 0.093831979  | 0.049445545 |
| NR2F1-AS1 | MT1X     | -0.305779438 | 7.42E-11    |

|           |          |              |             |
|-----------|----------|--------------|-------------|
| NR2F1-AS1 | ACACB    | -0.686273286 | 0           |
| NR2F1-AS1 | ARC      | -0.247606782 | 1.63E-07    |
| NR2F1-AS1 | KLK4     | -0.186748621 | 8.27E-05    |
| NR2F1-AS1 | ZFPM2    | -0.338211065 | 4.48E-13    |
| NR2F1-AS1 | AKAP12   | -0.404723176 | 0           |
| NR2F1-AS1 | GJB6     | -0.443607322 | 1.37E-22    |
| NR2F1-AS1 | ERO1LB   | -0.610252413 | 0           |
| NR2F1-AS1 | DNALI1   | -0.483023797 | 0           |
| NR2F1-AS1 | HKDC1    | -0.31840124  | 1.10E-11    |
| NR2F1-AS1 | ZFP36L2  | -0.50108009  | 0           |
| NR2F1-AS1 | CAPSL    | -0.556172946 | 5.19E-37    |
| NR2F1-AS1 | CYP7B1   | -0.516869399 | 0           |
| NR2F1-AS1 | CPQ      | -0.499453785 | 0           |
| NR2F1-AS1 | RPS6KA6  | -0.658619749 | 6.15E-56    |
| NR2F1-AS1 | TLE1     | -0.452913051 | 0           |
| NR2F1-AS1 | TP53INP2 | -0.658961128 | 0           |
| NR2F1-AS1 | KATNAL2  | -0.69635975  | 0           |
| NR2F1-AS1 | SGPP2    | -0.142402352 | 0.002808448 |
| NR2F1-AS1 | CTH      | -0.490557335 | 0           |
| NR2F1-AS1 | KIF12    | -0.391705932 | 0           |
| NR2F1-AS1 | TMEM220  | -0.534779457 | 0           |
| NR2F1-AS1 | CENPJ    | -0.433104786 | 0           |
| NR2F1-AS1 | FAM155B  | -0.405880851 | 0           |
| NR2F1-AS1 | WFS1     | -0.621800367 | 0           |
| NR2F1-AS1 | SELENBP1 | -0.513936065 | 0           |
| NR2F1-AS1 | SNTA1    | -0.496027    | 0           |
| NR2F1-AS1 | FRAS1    | -0.244779259 | 2.26E-07    |
| NR2F1-AS1 | FBLN7    | -0.533106772 | 0           |
| NR2F1-AS1 | AGPAT9   | -0.60150319  | 0           |
| NR2F1-AS1 | GPR83    | -0.457855366 | 0           |
| NR2F1-AS1 | PRTG     | -0.551233558 | 0           |
| NR2F1-AS1 | EGR3     | -0.18221717  | 0.000126583 |
| NR2F1-AS1 | GRAMD2   | -0.367585109 | 1.86E-15    |
| NR2F1-AS1 | HYOU1    | -0.642733116 | 0           |
| NR2F1-AS1 | FBLN5    | -0.239769571 | 4.02E-07    |
| NR2F1-AS1 | ITM2A    | -0.539569581 | 0           |
| NR2F1-AS1 | SRF      | -0.435060579 | 0           |
| NR2F1-AS1 | FGFR2    | -0.4892591   | 0           |
| NR2F1-AS1 | MT1A     | -0.210919552 | 8.32E-06    |
| NR2F1-AS1 | MAMDC2   | -0.154953236 | 0.001139269 |
| NR2F1-AS1 | FHL2     | -0.302142734 | 1.27E-10    |
| NR2F1-AS1 | FTCDNL1  | -0.562959801 | 0           |
| NR2F1-AS1 | PKIA     | -0.497545934 | 0           |
| NR2F1-AS1 | DNAJB4   | -0.459319551 | 0           |
| NR2F1-AS1 | SLC25A33 | -0.546629382 | 0           |
| NR2F1-AS1 | EYA2     | -0.34593126  | 1.19E-13    |
| NR2F1-AS1 | LPAR1    | -0.197101133 | 3.31E-05    |
| NR2F1-AS1 | STX11    | -0.182904654 | 0.000119249 |
| NR2F1-AS1 | ARHGEF28 | -0.417952893 | 0           |
| NR2F1-AS1 | OR2W3    | -0.63224965  | 0           |
| NR2F1-AS1 | ALDH1B1  | -0.529579727 | 4.19E-33    |

|           |          |              |             |
|-----------|----------|--------------|-------------|
| NR2F1-AS1 | CXCL12   | -0.136294845 | 0.004251534 |
| NR2F1-AS1 | OLFM2    | -0.447991444 | 0           |
| NR2F1-AS1 | TUB      | -0.564646102 | 0           |
| NR2F1-AS1 | HTRA3    | -0.154418936 | 0.001185521 |
| NR2F1-AS1 | CKB      | -0.388319996 | 0           |
| NR2F1-AS1 | RGS2     | -0.009001552 | 0.850763221 |
| NR2F1-AS1 | SHANK2   | -0.586866449 | 0           |
| NR2F1-AS1 | CNTFR    | -0.524756514 | 1.97E-32    |
| NR2F1-AS1 | CYTH3    | -0.533381369 | 0           |
| NR2F1-AS1 | PLAC9    | -0.282545523 | 1.98E-09    |
| NR2F1-AS1 | WVOX     | -0.668237418 | 0           |
| NR2F1-AS1 | NPR3     | -0.46032163  | 0           |
| NR2F1-AS1 | SDC2     | -0.409022544 | 0           |
| NR2F1-AS1 | KLF15    | -0.623278877 | 0           |
| NR2F1-AS1 | TMEM164  | -0.581125166 | 0           |
| NR2F1-AS1 | LONRF3   | -0.26714045  | 1.49E-08    |
| NR2F1-AS1 | GBP1     | -0.03302167  | 0.489984145 |
| NR2F1-AS1 | ARHGAP6  | -0.381176085 | 3.20E-17    |
| NR2F1-AS1 | TMEM119  | -0.032065688 | 0.502640558 |
| NR2F1-AS1 | SH3RF1   | -0.495637799 | 0           |
| NR2F1-AS1 | CRELD2   | -0.533826028 | 0           |
| NR2F1-AS1 | PCP4     | -0.146205148 | 0.002152042 |
| NR2F1-AS1 | GCSH     | -0.660097102 | 0           |
| NR2F1-AS1 | IMPA2    | -0.626726654 | 0           |
| NR2F1-AS1 | C1R      | 0.12153116   | 0.010855318 |
| NR2F1-AS1 | SUCNR1   | -0.290772076 | 6.40E-10    |
| NR2F1-AS1 | SFRP1    | -0.308029542 | 5.32E-11    |
| NR2F1-AS1 | UGT8     | -0.565684208 | 0           |
| NR2F1-AS1 | TLE4     | -0.147842232 | 0.001915356 |
| NR2F1-AS1 | ANTXR1   | -0.304681618 | 8.73E-11    |
| NR2F1-AS1 | GPX3     | -0.458135211 | 0           |
| NR2F1-AS1 | DPY19L2  | -0.482638426 | 0           |
| NR2F1-AS1 | FAM46C   | -0.439505045 | 0           |
| NR2F1-AS1 | IL33     | -0.163554955 | 0.000581112 |
| NR2F1-AS1 | PEG3     | -0.593424856 | 0           |
| NR2F1-AS1 | FAHD2A   | -0.597888187 | 0           |
| NR2F1-AS1 | PTGDS    | -0.043587118 | 0.362110787 |
| NR2F1-AS1 | CHCHD10  | -0.414420581 | 0           |
| NR2F1-AS1 | CD36     | -0.614254915 | 0           |
| NR2F1-AS1 | ANKRD37  | -0.445987002 | 0           |
| NR2F1-AS1 | TSPAN33  | -0.511859428 | 0           |
| NR2F1-AS1 | PRDM16   | -0.618328478 | 0           |
| NR2F1-AS1 | UST      | -0.570985229 | 0           |
| NR2F1-AS1 | NEXN     | -0.491342687 | 0           |
| NR2F1-AS1 | NUPR1L   | -0.220318318 | 3.16E-06    |
| NR2F1-AS1 | SLC24A3  | -0.491254606 | 0           |
| NR2F1-AS1 | MARC1    | -0.611627099 | 0           |
| NR2F1-AS1 | MYH11    | -0.256069069 | 5.91E-08    |
| NR2F1-AS1 | APOA1    | -0.542452653 | 5.95E-35    |
| NR2F1-AS1 | TMEM178B | -0.422269564 | 0           |
| NR2F1-AS1 | CAPN6    | -0.188668765 | 6.96E-05    |



|           |          |              |             |
|-----------|----------|--------------|-------------|
| NR2F1-AS1 | PPM1L    | -0.594334458 | 0           |
| NR2F1-AS1 | FZD8     | -0.587991501 | 0           |
| NR2F1-AS1 | RCAN2    | -0.545874667 | 0           |
| NR2F1-AS1 | COPZ2    | -0.542195128 | 0           |
| NR2F1-AS1 | GAS1     | -0.123437168 | 0.009667379 |
| NR2F1-AS1 | DACT1    | -0.435377159 | 0           |
| NR2F1-AS1 | WBSCR17  | -0.571334007 | 0           |
| NR2F1-AS1 | NCS1     | -0.457988835 | 0           |
| NR2F1-AS1 | SPIRE2   | -0.419365449 | 0           |
| NR2F1-AS1 | C15orf52 | -0.368715693 | 1.45E-15    |
| NR2F1-AS1 | SPAG5    | -0.423714175 | 0           |
| NR2F1-AS1 | ARL4D    | -0.391671465 | 0           |
| NR2F1-AS1 | FAM189A2 | -0.438309358 | 0           |
| NR2F1-AS1 | MAP1LC3A | -0.618472301 | 0           |
| NR2F1-AS1 | KLF6     | -0.048510426 | 0.310402434 |
| NR2F1-AS1 | ADD3     | -0.369665293 | 1.17E-15    |
| NR2F1-AS1 | TSPAN7   | -0.556187645 | 0           |
| NR2F1-AS1 | KLF9     | -0.394277155 | 0           |
| NR2F1-AS1 | KCNQ1    | -0.606221118 | 0           |
| NR2F1-AS1 | MAN1A1   | -0.045439085 | 0.342060196 |
| NR2F1-AS1 | MLF1     | -0.345915658 | 1.19E-13    |
| NR2F1-AS1 | RARB     | -0.580087769 | 0           |
| NR2F1-AS1 | CDC42EP2 | -0.331251401 | 1.42E-12    |
| NR2F1-AS1 | FAM3B    | -0.11553145  | 0.015481942 |
| NR2F1-AS1 | GADD45B  | -0.183036988 | 0.000117884 |
| NR2F1-AS1 | TMEM47   | -0.483078121 | 0           |
| NR2F1-AS1 | SDF2L1   | -0.480626324 | 0           |
| NR2F1-AS1 | CCDC85A  | -0.343292238 | 1.88E-13    |
| NR2F1-AS1 | CRYBG3   | -0.23557871  | 6.44E-07    |
| NR2F1-AS1 | FBLN2    | 0.023049101  | 0.629947261 |
| NR2F1-AS1 | PEBP4    | -0.238046392 | 4.88E-07    |
| NR2F1-AS1 | CDADC1   | -0.64072371  | 0           |
| NR2F1-AS1 | FAM63A   | -0.572500759 | 0           |
| NR2F1-AS1 | GLUL     | -0.280851278 | 2.49E-09    |
| NR2F1-AS1 | FREM2    | -0.430284497 | 0           |
| NR2F1-AS1 | ACKR3    | -0.559409759 | 0           |
| NR2F1-AS1 | DENND6A  | -0.677010329 | 0           |
| NR2F1-AS1 | CLDN8    | -0.06117634  | 0.200697413 |
| NR2F1-AS1 | UTS2R    | -0.219595092 | 3.41E-06    |
| NR2F1-AS1 | SCNN1B   | -0.351096827 | 4.72E-14    |
| NR2F1-AS1 | TTC30A   | -0.565364082 | 0           |
| NR2F1-AS1 | CORO2B   | -0.558420587 | 0           |
| NR2F1-AS1 | TC2N     | -0.267106976 | 1.50E-08    |
| NR2F1-AS1 | ALDH2    | -0.475764431 | 0           |
| NR2F1-AS1 | GPR183   | 0.055257051  | 0.247841798 |
| NR2F1-AS1 | C4orf47  | -0.45035516  | 0           |
| NR2F1-AS1 | SLC25A42 | -0.6782419   | 0           |
| NR2F1-AS1 | LGMN     | -0.562467909 | 0           |
| NR2F1-AS1 | ACSF2    | -0.54606714  | 0           |
| NR2F1-AS1 | KIAA1467 | -0.630705611 | 0           |
| NR2F1-AS1 | PRKG1    | -0.56813487  | 0           |

|           |          |              |             |
|-----------|----------|--------------|-------------|
| NR2F1-AS1 | GNAI1    | -0.552125713 | 0           |
| NR2F1-AS1 | ABCC4    | -0.366659055 | 2.28E-15    |
| NR2F1-AS1 | PRPS1    | -0.638504668 | 0           |
| NR2F1-AS1 | TSPAN5   | -0.321403932 | 6.88E-12    |
| NR2F1-AS1 | CR2      | -0.110257393 | 0.020854341 |
| NR2F1-AS1 | CCDC170  | -0.458318606 | 0           |
| NR2F1-AS1 | RRAD     | 0.096645836  | 0.043010282 |
| NR2F1-AS1 | SCGB2A1  | -0.442457952 | 0           |
| NR2F1-AS1 | SESN3    | -0.217263139 | 4.59E-06    |
| NR2F1-AS1 | SGK223   | -0.271010334 | 9.08E-09    |
| NR2F1-AS1 | NDRG2    | -0.619090569 | 0           |
| NR2F1-AS1 | C3orf52  | -0.259049918 | 4.11E-08    |
| NR2F1-AS1 | FLRT3    | 0.40138816   | 0           |
| NR2F1-AS1 | MST1R    | 0.645115129  | 0           |
| NR2F1-AS1 | SDC1     | 0.377584627  | 1.45E-16    |
| NR2F1-AS1 | ST8SIA4  | 0.578444727  | 0           |
| NR2F1-AS1 | UBTD1    | 0.401417804  | 0           |
| NR2F1-AS1 | EPHA2    | 0.396668813  | 0           |
| NR2F1-AS1 | TMEM130  | 0.314300587  | 2.07E-11    |
| NR2F1-AS1 | SPINK2   | 0.517208674  | 0           |
| NR2F1-AS1 | MMP16    | 0.628034676  | 0           |
| NR2F1-AS1 | SIGLEC15 | 0.531372671  | 0           |
| NR2F1-AS1 | RIN1     | 0.611229529  | 0           |
| NR2F1-AS1 | IL1RN    | 0.571175575  | 0           |
| NR2F1-AS1 | FCER1G   | 0.460172843  | 0           |
| NR2F1-AS1 | CD276    | 0.632928625  | 0           |
| NR2F1-AS1 | CTSB     | 0.425838754  | 0           |
| NR2F1-AS1 | FAM171A2 | 0.086361509  | 0.070665356 |
| NR2F1-AS1 | ASPHD1   | 0.536808012  | 0           |
| NR2F1-AS1 | C15orf48 | 0.569610827  | 0           |
| NR2F1-AS1 | DYSF     | 0.127153584  | 0.007678547 |
| NR2F1-AS1 | PDZRN4   | 0.207961035  | 1.17E-05    |
| NR2F1-AS1 | EFHD2    | 0.29516151   | 3.45E-10    |
| NR2F1-AS1 | ASF1B    | 0.37973814   | 6.53E-17    |
| NR2F1-AS1 | AQP1     | 0.147228219  | 0.002001183 |
| NR2F1-AS1 | ARRDC2   | 0.511068402  | 0           |
| NR2F1-AS1 | PRSS1    | 0.456387611  | 5.69E-24    |
| NR2F1-AS1 | MAPK13   | 0.645912538  | 0           |
| NR2F1-AS1 | CST5     | 0.615173887  | 4.65E-47    |
| NR2F1-AS1 | AHR      | 0.576404968  | 0           |
| NR2F1-AS1 | BAX      | 0.49530122   | 0           |
| NR2F1-AS1 | C1orf115 | 0.216656502  | 4.88E-06    |
| NR2F1-AS1 | PLK3     | 0.503912861  | 0           |
| NR2F1-AS1 | JAG2     | 0.259329337  | 3.97E-08    |
| NR2F1-AS1 | RAD23B   | 0.496972628  | 0           |
| NR2F1-AS1 | CA12     | -0.117913746 | 0.013470247 |
| NR2F1-AS1 | ADTRP    | 0.277927589  | 3.67E-09    |
| NR2F1-AS1 | UCP2     | 0.324340245  | 4.33E-12    |
| NR2F1-AS1 | IGFBP2   | 0.261243713  | 3.13E-08    |
| NR2F1-AS1 | LOXL2    | 0.26400202   | 2.22E-08    |
| NR2F1-AS1 | GPX1     | 0.454074555  | 0           |

|           |          |             |             |
|-----------|----------|-------------|-------------|
| NR2F1-AS1 | P3H3     | 0.465192175 | 0           |
| NR2F1-AS1 | C2orf81  | 0.388307372 | 0           |
| NR2F1-AS1 | CDT1     | 0.418679525 | 0           |
| NR2F1-AS1 | SNX25    | 0.396840011 | 0           |
| NR2F1-AS1 | MTHFD1L  | 0.492589577 | 0           |
| NR2F1-AS1 | CDC42BPG | 0.628759345 | 1.10E-49    |
| NR2F1-AS1 | MSN      | 0.496542011 | 0           |
| NR2F1-AS1 | SIGLEC6  | 0.429725548 | 3.72E-21    |
| NR2F1-AS1 | F2R      | 0.212677119 | 7.31E-06    |
| NR2F1-AS1 | TMEM184A | 0.608639867 | 0           |
| NR2F1-AS1 | CKS2     | 0.280886312 | 2.47E-09    |
| NR2F1-AS1 | TAX1BP3  | 0.64389377  | 0           |
| NR2F1-AS1 | PMEP1    | 0.574087916 | 0           |
| NR2F1-AS1 | CXCL16   | 0.619623309 | 0           |
| NR2F1-AS1 | FAXC     | 0.654189018 | 0           |
| NR2F1-AS1 | VTCN1    | 0.61541564  | 4.18E-47    |
| NR2F1-AS1 | SH2D4A   | 0.584884133 | 0           |
| NR2F1-AS1 | RNF24    | 0.377881209 | 1.31E-16    |
| NR2F1-AS1 | LY6G6C   | 0.499985426 | 3.82E-29    |
| NR2F1-AS1 | NID1     | 0.364180876 | 3.83E-15    |
| NR2F1-AS1 | STAC     | 0.699916032 | 0           |
| NR2F1-AS1 | RAB34    | 0.537264302 | 0           |
| NR2F1-AS1 | HES4     | 0.369872517 | 1.12E-15    |
| NR2F1-AS1 | EPHA10   | 0.536587172 | 0           |
| NR2F1-AS1 | ENTPD2   | 0.424676257 | 0           |
| NR2F1-AS1 | DDB2     | 0.601667579 | 0           |
| NR2F1-AS1 | NKAIN4   | 0.416178085 | 0           |
| NR2F1-AS1 | TRIM29   | 0.466042063 | 0           |
| NR2F1-AS1 | ADCY8    | 0.628964966 | 1.00E-49    |
| NR2F1-AS1 | SFTA2    | 0.474041961 | 0           |
| NR2F1-AS1 | NRIP1    | 0.457223765 | 0           |
| NR2F1-AS1 | VWA1     | 0.166353821 | 0.000473102 |
| NR2F1-AS1 | APLNR    | 0.19278744  | 4.94E-05    |
| NR2F1-AS1 | REN      | 0.470631963 | 1.40E-25    |
| NR2F1-AS1 | EDIL3    | 0.260446021 | 3.46E-08    |
| NR2F1-AS1 | AGR1     | 0.369123475 | 1.33E-15    |
| NR2F1-AS1 | TREM1    | 0.587577337 | 0           |
| NR2F1-AS1 | SRL      | 0.270127398 | 1.02E-08    |
| NR2F1-AS1 | RASGRF1  | 0.521640233 | 0           |
| NR2F1-AS1 | RMI2     | 0.475140206 | 0           |
| NR2F1-AS1 | SAMD1    | 0.443973198 | 0           |
| NR2F1-AS1 | MGAT4B   | 0.58671213  | 0           |
| NR2F1-AS1 | NXN      | 0.658549942 | 0           |
| NR2F1-AS1 | SH3BGRL3 | 0.592518659 | 0           |
| NR2F1-AS1 | CA11     | 0.339830703 | 3.40E-13    |
| NR2F1-AS1 | PLD3     | 0.262368907 | 2.72E-08    |
| NR2F1-AS1 | LURAP1L  | 0.55869107  | 0           |
| NR2F1-AS1 | CARNS1   | 0.143188981 | 0.002659324 |
| NR2F1-AS1 | PDLIM7   | 0.498610422 | 0           |
| NR2F1-AS1 | BCL2L1   | 0.719656924 | 0           |
| NR2F1-AS1 | GGT6     | 0.273532482 | 6.55E-09    |

|           |          |             |             |
|-----------|----------|-------------|-------------|
| NR2F1-AS1 | DPYSL3   | 0.459621805 | 0           |
| NR2F1-AS1 | FYN      | 0.561212934 | 0           |
| NR2F1-AS1 | TK1      | 0.367093218 | 2.07E-15    |
| NR2F1-AS1 | AK1      | 0.374448041 | 3.63E-16    |
| NR2F1-AS1 | HIGD1B   | 0.03410176  | 0.475892972 |
| NR2F1-AS1 | TMEM59L  | 0.410837775 | 0           |
| NR2F1-AS1 | MEGF9    | 0.402521013 | 0           |
| NR2F1-AS1 | ZFP36L1  | 0.466515374 | 0           |
| NR2F1-AS1 | ADRA1B   | 0.423016337 | 0           |
| NR2F1-AS1 | EPHA4    | 0.595808996 | 0           |
| NR2F1-AS1 | TCERG1L  | 0.215600666 | 5.44E-06    |
| NR2F1-AS1 | NGFR     | 0.271910716 | 8.09E-09    |
| NR2F1-AS1 | EBI3     | 0.637097502 | 0           |
| NR2F1-AS1 | S100A10  | 0.653612166 | 0           |
| NR2F1-AS1 | S100B    | 0.631797474 | 0           |
| NR2F1-AS1 | CD44     | 0.263802313 | 2.27E-08    |
| NR2F1-AS1 | BHLHE41  | 0.395127044 | 0           |
| NR2F1-AS1 | FBXO2    | 0.474988724 | 0           |
| NR2F1-AS1 | SLC30A2  | 0.4100537   | 0           |
| NR2F1-AS1 | FRMD5    | 0.671322518 | 0           |
| NR2F1-AS1 | SAMD11   | 0.305491083 | 7.74E-11    |
| NR2F1-AS1 | SIPA1L2  | 0.400421114 | 0           |
| NR2F1-AS1 | S100A16  | 0.588467507 | 0           |
| NR2F1-AS1 | PPL      | 0.598725593 | 0           |
| NR2F1-AS1 | ARHGDIB  | 0.273837148 | 6.29E-09    |
| NR2F1-AS1 | CDC42EP3 | 0.702763129 | 0           |
| NR2F1-AS1 | RUNX2    | 0.574426765 | 0           |
| NR2F1-AS1 | LAMC2    | 0.580212444 | 0           |
| NR2F1-AS1 | BRINP1   | 0.461932049 | 0           |
| NR2F1-AS1 | GPRC5B   | 0.448255687 | 0           |
| NR2F1-AS1 | AQP5     | 0.241705932 | 3.22E-07    |
| NR2F1-AS1 | PLAG1    | 0.377025789 | 1.73E-16    |
| NR2F1-AS1 | PTPRU    | 0.557177952 | 0           |
| NR2F1-AS1 | ANGPTL4  | 0.513076816 | 0           |
| NR2F1-AS1 | PALM3    | 0.31916943  | 9.76E-12    |
| NR2F1-AS1 | ACP5     | 0.462565777 | 0           |
| NR2F1-AS1 | DLG4     | 0.269185316 | 1.15E-08    |
| NR2F1-AS1 | ETNK2    | 0.445257676 | 0           |
| NR2F1-AS1 | CD109    | 0.567874883 | 0           |
| NR2F1-AS1 | SNX22    | 0.326301285 | 3.17E-12    |
| NR2F1-AS1 | TMEM98   | 0.468923343 | 0           |
| NR2F1-AS1 | CTHRC1   | 0.487279053 | 0           |
| NR2F1-AS1 | S100A2   | 0.624792989 | 0           |
| NR2F1-AS1 | C11orf80 | 0.711078615 | 0           |
| NR2F1-AS1 | SREBF1   | 0.533931271 | 0           |
| NR2F1-AS1 | PRSS22   | 0.655840995 | 0           |
| NR2F1-AS1 | CMTM3    | 0.648655526 | 0           |
| NR2F1-AS1 | RDH5     | 0.402095076 | 0           |
| NR2F1-AS1 | MYH10    | 0.572909108 | 0           |
| NR2F1-AS1 | EVPL     | 0.511819997 | 0           |
| NR2F1-AS1 | SCD      | 0.430859788 | 0           |

|           |          |              |             |
|-----------|----------|--------------|-------------|
| NR2F1-AS1 | CD151    | 0.528292678  | 0           |
| NR2F1-AS1 | S100A4   | 0.538943512  | 0           |
| NR2F1-AS1 | BNIP1    | 0.431976614  | 0           |
| NR2F1-AS1 | MAP3K6   | 0.60827492   | 0           |
| NR2F1-AS1 | MANEAL   | 0.390056224  | 0           |
| NR2F1-AS1 | CD207    | 0.584131534  | 1.62E-41    |
| NR2F1-AS1 | CD1A     | 0.61912883   | 8.24E-48    |
| NR2F1-AS1 | C3       | 0.507905151  | 0           |
| NR2F1-AS1 | NT5E     | 0.633149607  | 0           |
| NR2F1-AS1 | CACNG4   | 0.581324008  | 4.80E-41    |
| NR2F1-AS1 | FHOD1    | 0.492863748  | 0           |
| NR2F1-AS1 | LEMD1    | 0.556836408  | 0           |
| NR2F1-AS1 | ATP11A   | 0.350446929  | 5.31E-14    |
| NR2F1-AS1 | PPAP2C   | 0.420967499  | 0           |
| NR2F1-AS1 | DRAM1    | 0.651365892  | 0           |
| NR2F1-AS1 | CDA      | 0.204656655  | 1.61E-05    |
| NR2F1-AS1 | CCND2    | 0.357805723  | 1.35E-14    |
| NR2F1-AS1 | LCN6     | 0.255349609  | 5.79E-08    |
| NR2F1-AS1 | CDH4     | 0.422327718  | 0           |
| NR2F1-AS1 | MMP11    | 0.608735891  | 0           |
| NR2F1-AS1 | B3GAT1   | 0.253640108  | 7.93E-08    |
| NR2F1-AS1 | SPP1     | 0.36200779   | 5.95E-15    |
| NR2F1-AS1 | HLA-DQB1 | 0.493413651  | 0           |
| NR2F1-AS1 | SDC3     | 0.521999648  | 0           |
| NR2F1-AS1 | CX3CL1   | 0.50208685   | 0           |
| NR2F1-AS1 | SDK1     | 0.471025653  | 0           |
| NR2F1-AS1 | DOCK9    | 0.475885702  | 0           |
| NR2F1-AS1 | CSF2     | 0.724796995  | 1.03E-72    |
| NR2F1-AS1 | GRHL3    | 0.7499166    | 0           |
| NR2F1-AS1 | TMEM92   | 0.70831045   | 4.28E-68    |
| NR2F1-AS1 | BASP1    | 0.609728325  | 0           |
| NR2F1-AS1 | HRH1     | 0.60870185   | 0           |
| NR2F1-AS1 | ESM1     | -0.007976778 | 0.867586573 |
| NR2F1-AS1 | B4GALNT3 | 0.495094705  | 0           |
| NR2F1-AS1 | LMO3     | 0.374472011  | 3.61E-16    |
| NR2F1-AS1 | C9orf16  | 0.55371897   | 0           |
| NR2F1-AS1 | SEMA3F   | 0.245467594  | 2.09E-07    |
| NR2F1-AS1 | PLA2G12B | 0.261831405  | 2.58E-08    |
| NR2F1-AS1 | KLK6     | 0.439609032  | 3.60E-22    |
| NR2F1-AS1 | ST3GAL5  | 0.415539818  | 0           |
| NR2F1-AS1 | FAM132B  | 0.135321843  | 0.004535233 |
| NR2F1-AS1 | CDKN1A   | 0.335700406  | 6.82E-13    |
| NR2F1-AS1 | E2F1     | 0.436140527  | 0           |
| NR2F1-AS1 | B3GNT8   | 0.408632775  | 0           |
| NR2F1-AS1 | MTMR11   | 0.650642948  | 0           |
| NR2F1-AS1 | MYO1G    | 0.621727179  | 0           |
| NR2F1-AS1 | TMSB10   | 0.622527708  | 0           |
| NR2F1-AS1 | UNC5CL   | 0.709409475  | 0           |
| NR2F1-AS1 | ABR      | 0.61751646   | 0           |
| NR2F1-AS1 | PLP2     | 0.660892382  | 0           |
| NR2F1-AS1 | SRCIN1   | 0.360129299  | 8.63E-15    |

|           |          |             |          |
|-----------|----------|-------------|----------|
| NR2F1-AS1 | PDE9A    | 0.621794126 | 0        |
| NR2F1-AS1 | TREM2    | 0.414598587 | 0        |
| NR2F1-AS1 | KDELR3   | 0.471606901 | 0        |
| NR2F1-AS1 | PC       | 0.430155425 | 0        |
| NR2F1-AS1 | C2CD4A   | 0.619429276 | 0        |
| NR2F1-AS1 | PELI1    | 0.646027142 | 0        |
| NR2F1-AS1 | SSX1     | 0.321418542 | 6.87E-12 |
| NR2F1-AS1 | MROH6    | 0.604420638 | 0        |
| NR2F1-AS1 | ESPN     | 0.500691314 | 0        |
| NR2F1-AS1 | BMP1     | 0.442939064 | 0        |
| NR2F1-AS1 | TM4SF4   | 0.561291059 | 8.35E-38 |
| NR2F1-AS1 | CORO2A   | 0.537929944 | 0        |
| NR2F1-AS1 | CD164L2  | 0.584069583 | 1.66E-41 |
| NR2F1-AS1 | CTSS     | 0.521576406 | 0        |
| NR2F1-AS1 | CLU      | 0.51127279  | 0        |
| NR2F1-AS1 | TMSB4X   | 0.653711878 | 0        |
| NR2F1-AS1 | WNT10A   | 0.570156069 | 3.28E-39 |
| NR2F1-AS1 | NAPSA    | 0.631009426 | 0        |
| NR2F1-AS1 | PLEKHA4  | 0.438661823 | 0        |
| NR2F1-AS1 | SFTPA1   | 0.251793669 | 8.94E-08 |
| NR2F1-AS1 | C1orf116 | 0.60009957  | 0        |
| NR2F1-AS1 | TM4SF1   | 0.586959069 | 0        |
| NR2F1-AS1 | SEL1L3   | 0.481316504 | 0        |
| NR2F1-AS1 | VASN     | 0.603208356 | 0        |
| NR2F1-AS1 | NPTXR    | 0.575906127 | 0        |
| NR2F1-AS1 | PDE4C    | 0.55036906  | 0        |
| NR2F1-AS1 | CDC42EP1 | 0.649769656 | 0        |
| NR2F1-AS1 | ENDOD1   | 0.628955767 | 0        |
| NR2F1-AS1 | RYR1     | 0.555985385 | 0        |
| NR2F1-AS1 | IL1RAP   | 0.58070008  | 0        |
| NR2F1-AS1 | SLC35F2  | 0.598963759 | 4.33E-44 |
| NR2F1-AS1 | ISYNA1   | 0.456196439 | 0        |
| NR2F1-AS1 | HLA-G    | 0.620700704 | 0        |
| NR2F1-AS1 | CDKN2B   | 0.621993549 | 0        |
| NR2F1-AS1 | ALDH1A3  | 0.547867195 | 0        |
| NR2F1-AS1 | CLIP3    | 0.436300944 | 0        |
| NR2F1-AS1 | ULBP2    | 0.449842986 | 0        |
| NR2F1-AS1 | ETHE1    | 0.658913471 | 0        |
| NR2F1-AS1 | XPR1     | 0.566996343 | 0        |
| NR2F1-AS1 | SPTBN2   | 0.607413969 | 0        |
| NR2F1-AS1 | IVL      | 0.728578153 | 8.03E-74 |
| NR2F1-AS1 | MARCO    | 0.529650343 | 0        |
| NR2F1-AS1 | PLXND1   | 0.326562974 | 3.04E-12 |
| NR2F1-AS1 | EMILIN2  | 0.569722879 | 0        |
| NR2F1-AS1 | PLAUR    | 0.642638795 | 0        |
| NR2F1-AS1 | CDC42EP5 | 0.615929303 | 0        |
| NR2F1-AS1 | TRPC5    | 0.283525643 | 1.47E-09 |
| NR2F1-AS1 | TMEM100  | 0.61607965  | 0        |
| NR2F1-AS1 | QSOX1    | 0.593311812 | 0        |
| NR2F1-AS1 | ARHGAP23 | 0.47104395  | 0        |
| NR2F1-AS1 | MDFI     | 0.44843738  | 0        |

|           |           |             |             |
|-----------|-----------|-------------|-------------|
| NR2F1-AS1 | FSTL3     | 0.563529844 | 0           |
| NR2F1-AS1 | INF2      | 0.46523501  | 0           |
| NR2F1-AS1 | TGFBR1    | 0.57315633  | 0           |
| NR2F1-AS1 | TGFBI     | 0.418915683 | 0           |
| NR2F1-AS1 | ERBB3     | 0.622527566 | 0           |
| NR2F1-AS1 | CCL18     | 0.365933983 | 2.66E-15    |
| NR2F1-AS1 | CCL17     | 0.664309263 | 3.28E-57    |
| NR2F1-AS1 | C16orf45  | 0.386429591 | 0           |
| NR2F1-AS1 | PRDM1     | 0.301152852 | 1.46E-10    |
| NR2F1-AS1 | TRIM47    | 0.601496524 | 0           |
| NR2F1-AS1 | CNFN      | 0.460567434 | 0           |
| NR2F1-AS1 | ARMCX3    | 0.354473259 | 2.54E-14    |
| NR2F1-AS1 | RAMP1     | 0.364731346 | 3.42E-15    |
| NR2F1-AS1 | GABRD     | 0.070823109 | 0.13842044  |
| NR2F1-AS1 | COL13A1   | 0.305760715 | 7.44E-11    |
| NR2F1-AS1 | S100A5    | 0.445523478 | 0           |
| NR2F1-AS1 | MISP      | 0.554510563 | 0           |
| NR2F1-AS1 | HES6      | 0.22798943  | 1.48E-06    |
| NR2F1-AS1 | PSD3      | 0.521359963 | 0           |
| NR2F1-AS1 | DOK7      | 0.487391105 | 0           |
| NR2F1-AS1 | ZMAT3     | 0.542871833 | 0           |
| NR2F1-AS1 | MFAP2     | 0.464202577 | 0           |
| NR2F1-AS1 | TMEM79    | 0.598890834 | 0           |
| NR2F1-AS1 | SLC1A5    | 0.473902535 | 0           |
| NR2F1-AS1 | BBC3      | 0.553847616 | 0           |
| NR2F1-AS1 | HLA-DQB2  | 0.553751734 | 0           |
| NR2F1-AS1 | C1QL1     | 0.331880165 | 1.28E-12    |
| NR2F1-AS1 | TMEM215   | 0.143209977 | 0.00263368  |
| NR2F1-AS1 | PNP       | 0.533042236 | 0           |
| NR2F1-AS1 | ARNTL     | 0.514200592 | 0           |
| NR2F1-AS1 | CLDN2     | 0.435223778 | 1.02E-21    |
| NR2F1-AS1 | MVP       | 0.756535146 | 0           |
| NR2F1-AS1 | LGALS1    | 0.619817058 | 0           |
| NR2F1-AS1 | BIRC7     | 0.504518721 | 1.00E-29    |
| NR2F1-AS1 | COL8A1    | 0.619422893 | 0           |
| NR2F1-AS1 | PERP      | 0.693760443 | 0           |
| NR2F1-AS1 | GJA4      | 0.195204912 | 3.95E-05    |
| NR2F1-AS1 | IGFL2     | 0.683008668 | 1.33E-61    |
| NR2F1-AS1 | DAPK2     | 0.415330466 | 0           |
| NR2F1-AS1 | MAMLD1    | 0.566370558 | 0           |
| NR2F1-AS1 | ETV5      | 0.229105121 | 1.31E-06    |
| NR2F1-AS1 | RUNX1     | 0.700543945 | 0           |
| NR2F1-AS1 | LONRF2    | 0.226768638 | 1.69E-06    |
| NR2F1-AS1 | SPOCK1    | 0.182319151 | 0.000125469 |
| NR2F1-AS1 | XKRX      | 0.456855414 | 0           |
| NR2F1-AS1 | TGFBI     | 0.34259213  | 2.12E-13    |
| NR2F1-AS1 | ERP27     | 0.3576063   | 1.41E-14    |
| NR2F1-AS1 | TNFRSF10C | 0.478474371 | 0           |
| NR2F1-AS1 | PALM      | 0.534041053 | 0           |
| NR2F1-AS1 | TSC22D1   | 0.429364825 | 0           |
| NR2F1-AS1 | TGM2      | 0.608706956 | 0           |

|           |          |             |          |
|-----------|----------|-------------|----------|
| NR2F1-AS1 | UBE2QL1  | 0.262804914 | 2.58E-08 |
| NR2F1-AS1 | ECE1     | 0.598200654 | 0        |
| NR2F1-AS1 | COL8A2   | 0.715770587 | 0        |
| NR2F1-AS1 | HIST3H2A | 0.515843775 | 0        |
| NR2F1-AS1 | TNFRSF21 | 0.541799403 | 0        |
| NR2F1-AS1 | SOX4     | 0.589621919 | 0        |
| NR2F1-AS1 | ELF3     | 0.644035181 | 0        |
| NR2F1-AS1 | TPD52L1  | 0.436822763 | 0        |
| NR2F1-AS1 | INHBB    | 0.402588528 | 0        |
| NR2F1-AS1 | HPN      | 0.4245113   | 0        |
| NR2F1-AS1 | MMP7     | 0.542841849 | 5.21E-35 |
| NR2F1-AS1 | RAB27A   | 0.52631944  | 0        |
| NR2F1-AS1 | IGF2BP2  | 0.502790362 | 0        |
| NR2F1-AS1 | ITGB4    | 0.641614589 | 0        |
| NR2F1-AS1 | PPP1R1B  | 0.584287424 | 0        |
| NR2F1-AS1 | NPDC1    | 0.343676617 | 1.76E-13 |
| NR2F1-AS1 | CCL13    | 0.65940978  | 4.11E-56 |
| NR2F1-AS1 | SPINT1   | 0.670941401 | 0        |
| NR2F1-AS1 | HEY2     | 0.413744302 | 0        |
| NR2F1-AS1 | CST2     | 0.597058494 | 9.43E-44 |
| NR2F1-AS1 | ADM      | 0.297991161 | 2.30E-10 |
| NR2F1-AS1 | VSTM2L   | 0.541698131 | 0        |
| NR2F1-AS1 | FAM84A   | 0.596074232 | 0        |
| NR2F1-AS1 | P4HA2    | 0.487434649 | 0        |
| NR2F1-AS1 | LPL      | 0.39003197  | 0        |
| NR2F1-AS1 | TMEM173  | 0.635439284 | 0        |
| NR2F1-AS1 | DHRS3    | 0.51484127  | 0        |
| NR2F1-AS1 | SCN1B    | 0.647374595 | 0        |
| NR2F1-AS1 | GLT1D1   | 0.231009001 | 1.07E-06 |
| NR2F1-AS1 | PHYHIP   | 0.546789233 | 0        |
| NR2F1-AS1 | BHLHE40  | 0.588244822 | 0        |
| NR2F1-AS1 | BID      | 0.614269808 | 0        |
| NR2F1-AS1 | POSTN    | 0.464819994 | 0        |
| NR2F1-AS1 | ITGA3    | 0.727755966 | 0        |
| NR2F1-AS1 | RSPO4    | 0.513314535 | 0        |
| NR2F1-AS1 | ADAMTS9  | 0.227962623 | 1.49E-06 |
| NR2F1-AS1 | ABTB2    | 0.625793933 | 0        |
| NR2F1-AS1 | KCNQ3    | 0.655373358 | 0        |
| NR2F1-AS1 | ANXA1    | 0.538033627 | 0        |
| NR2F1-AS1 | S100A11  | 0.703736132 | 0        |
| NR2F1-AS1 | CEACAM6  | 0.690107102 | 2.35E-63 |
| NR2F1-AS1 | IER5L    | 0.546504708 | 0        |
| NR2F1-AS1 | KRT80    | 0.565607474 | 0        |
| NR2F1-AS1 | CDH6     | 0.679698    | 0        |
| NR2F1-AS1 | UNC5B    | 0.424430595 | 0        |
| NR2F1-AS1 | PLEKHN1  | 0.677940355 | 0        |
| NR2F1-AS1 | SYTL1    | 0.549041748 | 0        |
| NR2F1-AS1 | TMEM163  | 0.577925604 | 0        |
| NR2F1-AS1 | C4orf48  | 0.304972668 | 8.36E-11 |
| NR2F1-AS1 | B3GNT7   | 0.433705041 | 0        |
| NR2F1-AS1 | BAIAP3   | 0.473525248 | 0        |



|           |            |              |             |
|-----------|------------|--------------|-------------|
| NR2F1-AS1 | PHLDA2     | 0.638994431  | 0           |
| NR2F1-AS1 | GAP43      | 0.607464507  | 1.26E-45    |
| NR2F1-AS1 | S100A1     | 0.420060735  | 0           |
| NR2F1-AS1 | PTPRE      | 0.683506469  | 0           |
| NR2F1-AS1 | CCND1      | 0.537854061  | 0           |
| NR2F1-AS1 | ST6GALNAC5 | 0.672866608  | 3.52E-59    |
| NR2F1-AS1 | KRT17      | 0.432368368  | 0           |
| NR2F1-AS1 | HPCAL4     | 0.37895137   | 8.96E-17    |
| NR2F1-AS1 | GABBR2     | 0.459430893  | 0           |
| NR2F1-AS1 | DIRAS3     | 0.388574452  | 0           |
| NR2F1-AS1 | SERINC2    | 0.456165235  | 0           |
| NR2F1-AS1 | PTCHD4     | 0.474982909  | 0           |
| NR2F1-AS1 | EPS8       | 0.405134646  | 0           |
| NR2F1-AS1 | LY6E       | 0.569375945  | 0           |
| NR2F1-AS1 | UPP1       | 0.657920895  | 0           |
| NR2F1-AS1 | AHNAK2     | 0.697700678  | 0           |
| NR2F1-AS1 | PLXNC1     | 0.517286117  | 0           |
| NR2F1-AS1 | TNC        | 0.579441133  | 0           |
| NR2F1-AS1 | DUSP4      | 0.483298536  | 0           |
| NR2F1-AS1 | NRCAM      | 0.431432668  | 0           |
| NR2F1-AS1 | NRP2       | 0.551409152  | 0           |
| NR2F1-AS1 | CTSC       | 0.802822559  | 0           |
| NR2F1-AS1 | AMIGO2     | 0.499453643  | 0           |
| NR2F1-AS1 | NAB2       | 0.420220018  | 0           |
| NR2F1-AS1 | TBC1D2     | 0.675369982  | 0           |
| NR2F1-AS1 | PHLDA3     | 0.601490566  | 0           |
| NR2F1-AS1 | PTP4A3     | 0.526391919  | 0           |
| NR2F1-AS1 | CRABP2     | 0.474945747  | 0           |
| NR2F1-AS1 | GOS2       | 0.469941024  | 0           |
| NR2F1-AS1 | S100A6     | 0.695442064  | 0           |
| NR2F1-AS1 | FOXQ1      | 0.58453181   | 0           |
| NR2F1-AS1 | LRG1       | 0.562431599  | 0           |
| NR2F1-AS1 | LAMP5      | 0.543756046  | 0           |
| NR2F1-AS1 | ALDH3B1    | 0.609219981  | 0           |
| NR2F1-AS1 | CDH2       | -0.060083769 | 0.208868389 |
| NR2F1-AS1 | SCG5       | 0.22918072   | 1.30E-06    |
| NR2F1-AS1 | ZCCHC16    | 0.287863839  | 8.01E-10    |
| NR2F1-AS1 | GRB7       | 0.58757606   | 0           |
| NR2F1-AS1 | TIAM1      | 0.480390875  | 0           |
| NR2F1-AS1 | FXYD5      | 0.512890158  | 0           |
| NR2F1-AS1 | CLDN9      | 0.470589362  | 0           |
| NR2F1-AS1 | FAM43A     | 0.503995126  | 0           |
| NR2F1-AS1 | CHST2      | 0.478367143  | 0           |
| NR2F1-AS1 | HMGA2      | 0.551871541  | 0           |
| NR2F1-AS1 | GALNT7     | 0.538415736  | 0           |
| NR2F1-AS1 | CBLN1      | 0.613454528  | 0           |
| NR2F1-AS1 | STRA6      | 0.571085508  | 0           |
| NR2F1-AS1 | MUC21      | 0.657325034  | 1.19E-55    |
| NR2F1-AS1 | PRR36      | 0.507469001  | 0           |
| NR2F1-AS1 | NFE2L3     | 0.672297932  | 0           |
| NR2F1-AS1 | NR1D1      | 0.335637147  | 6.90E-13    |

|           |          |             |             |
|-----------|----------|-------------|-------------|
| NR2F1-AS1 | MUC1     | 0.646750086 | 0           |
| NR2F1-AS1 | NAT8L    | 0.251588576 | 1.01E-07    |
| NR2F1-AS1 | APOC1    | 0.265670875 | 1.80E-08    |
| NR2F1-AS1 | EVA1A    | 0.668918378 | 0           |
| NR2F1-AS1 | ENTPD1   | 0.17136975  | 0.000315621 |
| NR2F1-AS1 | COL1A1   | 0.579725091 | 0           |
| NR2F1-AS1 | FNDC4    | 0.580367755 | 0           |
| NR2F1-AS1 | FRMD3    | 0.205179041 | 1.54E-05    |
| NR2F1-AS1 | SHROOM4  | 0.556533727 | 0           |
| NR2F1-AS1 | NELL2    | 0.399769515 | 0           |
| NR2F1-AS1 | EPHB3    | 0.660186601 | 0           |
| NR2F1-AS1 | TMC6     | 0.626704528 | 0           |
| NR2F1-AS1 | NOD1     | 0.530365911 | 0           |
| NR2F1-AS1 | GGCT     | 0.589393419 | 0           |
| NR2F1-AS1 | ICAM1    | 0.668100262 | 0           |
| NR2F1-AS1 | PRSS23   | 0.669775358 | 0           |
| NR2F1-AS1 | CFI      | 0.663824014 | 0           |
| NR2F1-AS1 | CD55     | 0.652157059 | 0           |
| NR2F1-AS1 | RASD2    | 0.483977227 | 0           |
| NR2F1-AS1 | KLK11    | 0.448363921 | 4.25E-23    |
| NR2F1-AS1 | ICAM5    | 0.530070039 | 0           |
| NR2F1-AS1 | ADORA1   | 0.553741664 | 0           |
| NR2F1-AS1 | ITGA2    | 0.652525552 | 0           |
| NR2F1-AS1 | ABCC3    | 0.344255738 | 1.59E-13    |
| NR2F1-AS1 | MFGE8    | 0.609682654 | 0           |
| NR2F1-AS1 | STK32A   | 0.389569156 | 0           |
| NR2F1-AS1 | CYSLTR2  | 0.439905735 | 0           |
| NR2F1-AS1 | LAD1     | 0.567945234 | 0           |
| NR2F1-AS1 | MGAT3    | 0.5666965   | 0           |
| NR2F1-AS1 | IGFBP6   | 0.662941787 | 0           |
| NR2F1-AS1 | CYP2S1   | 0.670970194 | 0           |
| NR2F1-AS1 | KCNJ2    | 0.625644011 | 0           |
| NR2F1-AS1 | FAM20A   | 0.668050051 | 0           |
| NR2F1-AS1 | TGFA     | 0.509143956 | 0           |
| NR2F1-AS1 | MXRA8    | 0.63734983  | 0           |
| NR2F1-AS1 | C8orf4   | 0.571198268 | 0           |
| NR2F1-AS1 | CLDN10   | 0.721391734 | 9.85E-72    |
| NR2F1-AS1 | PDE5A    | 0.534104596 | 0           |
| NR2F1-AS1 | APOE     | 0.241760965 | 3.20E-07    |
| NR2F1-AS1 | SPOCK2   | 0.517078467 | 0           |
| NR2F1-AS1 | TENM1    | 0.296626971 | 2.80E-10    |
| NR2F1-AS1 | SLIT1    | 0.30291759  | 1.13E-10    |
| NR2F1-AS1 | CXCL14   | 0.454304473 | 0           |
| NR2F1-AS1 | ECM1     | 0.352220035 | 3.85E-14    |
| NR2F1-AS1 | DUSP5    | 0.615017574 | 0           |
| NR2F1-AS1 | SEZ6L2   | 0.460341913 | 0           |
| NR2F1-AS1 | THRSP    | 0.153501533 | 0.001268992 |
| NR2F1-AS1 | C19orf33 | 0.618894408 | 0           |
| NR2F1-AS1 | MPZL2    | 0.642131585 | 0           |
| NR2F1-AS1 | CTSH     | 0.558921556 | 0           |
| NR2F1-AS1 | CYP1B1   | 0.552388395 | 0           |

|           |           |             |          |
|-----------|-----------|-------------|----------|
| NR2F1-AS1 | ALOX5     | 0.730600368 | 0        |
| NR2F1-AS1 | SYTL5     | 0.624964208 | 6.14E-49 |
| NR2F1-AS1 | TNFRSF12A | 0.517860557 | 0        |
| NR2F1-AS1 | DUSP6     | 0.554794946 | 0        |
| NR2F1-AS1 | ALOX15B   | 0.670880837 | 0        |
| NR2F1-AS1 | SDC4      | 0.608512355 | 0        |
| NR2F1-AS1 | MDK       | 0.548156685 | 0        |
| NR2F1-AS1 | KRT19     | 0.690446418 | 0        |
| NR2F1-AS1 | MET       | 0.697792589 | 0        |
| NR2F1-AS1 | TESC      | 0.256441108 | 5.65E-08 |
| NR2F1-AS1 | CXCL17    | 0.685817659 | 2.73E-62 |
| NR2F1-AS1 | NPC2      | 0.510187452 | 0        |
| NR2F1-AS1 | COMP      | 0.559321536 | 0        |
| NR2F1-AS1 | TUSC3     | 0.495171722 | 0        |
| NR2F1-AS1 | TMPRSS4   | 0.711899142 | 0        |
| NR2F1-AS1 | LGALS3    | 0.715180686 | 0        |
| NR2F1-AS1 | CRLF1     | 0.457017108 | 0        |
| NR2F1-AS1 | CTXN1     | 0.548329584 | 0        |
| NR2F1-AS1 | PCSK1N    | 0.363762031 | 4.17E-15 |
| NR2F1-AS1 | NMU       | 0.520061376 | 8.68E-32 |
| NR2F1-AS1 | GALE      | 0.589841908 | 0        |
| NR2F1-AS1 | PCSK2     | 0.30563136  | 7.59E-11 |
| NR2F1-AS1 | GJB3      | 0.496763844 | 0        |
| NR2F1-AS1 | SLPI      | 0.638179861 | 0        |
| NR2F1-AS1 | AGR2      | 0.292104069 | 5.31E-10 |
| NR2F1-AS1 | MRC2      | 0.563825007 | 0        |
| NR2F1-AS1 | GOLT1A    | 0.456636985 | 0        |
| NR2F1-AS1 | SLC27A6   | 0.607065284 | 1.49E-45 |
| NR2F1-AS1 | KCNN4     | 0.786298391 | 0        |
| NR2F1-AS1 | ETV4      | 0.371446709 | 8.26E-16 |
| NR2F1-AS1 | SYT12     | 0.620443128 | 0        |
| NR2F1-AS1 | PVRL4     | 0.704527867 | 0        |
| NR2F1-AS1 | PLCD3     | 0.507191852 | 0        |
| NR2F1-AS1 | PLAU      | 0.748281785 | 0        |
| NR2F1-AS1 | LRRK2     | 0.288643243 | 8.60E-10 |
| NR2F1-AS1 | SFN       | 0.686117549 | 0        |
| NR2F1-AS1 | LPAR5     | 0.475839605 | 0        |
| NR2F1-AS1 | NGEF      | 0.641822948 | 0        |
| NR2F1-AS1 | DTX4      | 0.631930942 | 0        |
| NR2F1-AS1 | CST6      | 0.605263718 | 0        |
| NR2F1-AS1 | QPCT      | 0.491509204 | 0        |
| NR2F1-AS1 | TIMP1     | 0.608153507 | 0        |
| NR2F1-AS1 | CAMK2N1   | 0.60230074  | 0        |
| NR2F1-AS1 | KLHDC8A   | 0.291459419 | 5.81E-10 |
| NR2F1-AS1 | PDLIM4    | 0.65095272  | 0        |
| NR2F1-AS1 | SCEL      | 0.613569558 | 0        |
| NR2F1-AS1 | LCN2      | 0.666129577 | 0        |
| NR2F1-AS1 | PROS1     | 0.649406553 | 0        |
| NR2F1-AS1 | GABRB2    | 0.630243364 | 0        |
| NR2F1-AS1 | TMPRSS6   | 0.639764323 | 0        |
| NR2F1-AS1 | KLK7      | 0.476871991 | 2.61E-26 |

|              |          |              |          |
|--------------|----------|--------------|----------|
| NR2F1-AS1    | PDZK1IP1 | 0.660145184  | 0        |
| NR2F1-AS1    | CDH3     | 0.525532386  | 0        |
| NR2F1-AS1    | LRP4     | 0.379242278  | 8.01E-17 |
| NR2F1-AS1    | IGSF1    | 0.347740676  | 8.62E-14 |
| NR2F1-AS1    | B3GNT3   | 0.690390251  | 0        |
| NR2F1-AS1    | CLDN1    | 0.607383899  | 0        |
| NR2F1-AS1    | GDF15    | 0.541382401  | 0        |
| NR2F1-AS1    | ARHGAP36 | 0.419959548  | 3.48E-20 |
| NR2F1-AS1    | LAMB3    | 0.603699822  | 0        |
| NR2F1-AS1    | KLK10    | 0.556282392  | 0        |
| NR2F1-AS1    | DPP4     | 0.641745504  | 0        |
| NR2F1-AS1    | METTL7B  | 0.406178567  | 0        |
| NR2F1-AS1    | LIPH     | 0.741576151  | 0        |
| NR2F1-AS1    | CLDN16   | 0.605680577  | 0        |
| NR2F1-AS1    | CHI3L1   | 0.657388296  | 0        |
| NR2F1-AS1    | SLC22A31 | 0.667693142  | 5.55E-58 |
| NR2F1-AS1    | TACSTD2  | 0.610841179  | 0        |
| NR2F1-AS1    | SFTPB    | 0.746634063  | 0        |
| NR2F1-AS1    | RXRG     | 0.424357265  | 0        |
| NR2F1-AS1    | DCSTAMP  | 0.576314198  | 3.26E-40 |
| NR2F1-AS1    | CITED1   | 0.466442044  | 0        |
| NR2F1-AS1    | SERPINA1 | 0.762859664  | 0        |
| NR2F1-AS1    | PRR15    | 0.437154237  | 0        |
| NR2F1-AS1    | SLC34A2  | 0.620478303  | 0        |
| NR2F1-AS1    | FN1      | 0.711975167  | 0        |
| NR2F1-AS1    | ZCCHC12  | 0.359960938  | 8.92E-15 |
| RP11-363E7.4 | TFF3     | -0.388814015 | 0        |
| RP11-363E7.4 | CCL21    | -0.387307913 | 3.67E-17 |
| RP11-363E7.4 | TPO      | -0.379286105 | 7.87E-17 |
| RP11-363E7.4 | MT1G     | -0.292807581 | 4.81E-10 |
| RP11-363E7.4 | DIO1     | -0.252137627 | 9.50E-08 |
| RP11-363E7.4 | DPT      | -0.442868799 | 1.64E-22 |
| RP11-363E7.4 | CDH16    | -0.401225189 | 0        |
| RP11-363E7.4 | CRABP1   | -0.473727844 | 6.11E-26 |
| RP11-363E7.4 | SLC26A7  | -0.490087145 | 0        |
| RP11-363E7.4 | MT1H     | -0.317774507 | 9.32E-12 |
| RP11-363E7.4 | SLC26A4  | -0.547377857 | 0        |
| RP11-363E7.4 | SLC5A8   | -0.446637946 | 6.51E-23 |
| RP11-363E7.4 | PKHD1L1  | -0.278675028 | 2.84E-09 |
| RP11-363E7.4 | TFCP2L1  | -0.46776354  | 0        |
| RP11-363E7.4 | WSCD2    | -0.400668422 | 2.33E-18 |
| RP11-363E7.4 | IPCEF1   | -0.437586982 | 0        |
| RP11-363E7.4 | SLC5A5   | -0.34963569  | 4.55E-14 |
| RP11-363E7.4 | MT1F     | -0.255162162 | 6.60E-08 |
| RP11-363E7.4 | FOSB     | -0.261967933 | 2.86E-08 |
| RP11-363E7.4 | SEMA3D   | -0.373080319 | 6.04E-16 |
| RP11-363E7.4 | BMP8A    | -0.472846132 | 0        |
| RP11-363E7.4 | MATN2    | -0.479889906 | 0        |
| RP11-363E7.4 | PLA2R1   | -0.382772888 | 7.58E-18 |
| RP11-363E7.4 | COL23A1  | -0.572388566 | 0        |
| RP11-363E7.4 | HGD      | -0.466251415 | 0        |

|              |            |              |          |
|--------------|------------|--------------|----------|
| RP11-363E7.4 | TCEAL2     | -0.367911477 | 1.73E-15 |
| RP11-363E7.4 | CHRDL1     | -0.356246874 | 1.39E-14 |
| RP11-363E7.4 | TNFRSF11B  | -0.364590786 | 3.52E-15 |
| RP11-363E7.4 | FAM167A    | -0.503038435 | 0        |
| RP11-363E7.4 | KIT        | -0.394315735 | 0        |
| RP11-363E7.4 | SLC4A4     | -0.434259483 | 0        |
| RP11-363E7.4 | SMOC2      | -0.477029618 | 0        |
| RP11-363E7.4 | FHL1       | -0.434499471 | 0        |
| RP11-363E7.4 | OTOS       | -0.37756789  | 1.45E-16 |
| RP11-363E7.4 | IGFBPL1    | -0.530841708 | 2.78E-33 |
| RP11-363E7.4 | HBB        | -0.357367588 | 1.47E-14 |
| RP11-363E7.4 | BEX1       | -0.430767027 | 0        |
| RP11-363E7.4 | FABP4      | -0.495608509 | 1.37E-28 |
| RP11-363E7.4 | LMOD1      | -0.52074907  | 0        |
| RP11-363E7.4 | SOD3       | -0.350842371 | 4.94E-14 |
| RP11-363E7.4 | TMEM171    | -0.35337005  | 3.11E-14 |
| RP11-363E7.4 | PI16       | -0.41855485  | 0        |
| RP11-363E7.4 | ZMAT4      | -0.4124633   | 1.84E-19 |
| RP11-363E7.4 | MFAP4      | -0.452357191 | 0        |
| RP11-363E7.4 | CWH43      | -0.323606391 | 3.68E-12 |
| RP11-363E7.4 | SPX        | -0.503164812 | 0        |
| RP11-363E7.4 | APOD       | -0.284070272 | 1.61E-09 |
| RP11-363E7.4 | DPP6       | -0.427273578 | 0        |
| RP11-363E7.4 | MMRN1      | -0.443873345 | 0        |
| RP11-363E7.4 | WDR72      | -0.562762789 | 0        |
| RP11-363E7.4 | MPPED2     | -0.509343379 | 0        |
| RP11-363E7.4 | PAPSS2     | -0.429826647 | 0        |
| RP11-363E7.4 | DCN        | -0.358048123 | 1.29E-14 |
| RP11-363E7.4 | SORBS2     | -0.411278889 | 0        |
| RP11-363E7.4 | EGR2       | -0.345606028 | 1.26E-13 |
| RP11-363E7.4 | EDN3       | -0.47749879  | 2.20E-26 |
| RP11-363E7.4 | DIO2       | -0.572115671 | 0        |
| RP11-363E7.4 | ITPR1      | -0.431592235 | 0        |
| RP11-363E7.4 | CFD        | -0.346056786 | 1.16E-13 |
| RP11-363E7.4 | CPXM1      | -0.377762633 | 1.36E-16 |
| RP11-363E7.4 | ELMO1      | -0.455627105 | 0        |
| RP11-363E7.4 | GPC3       | -0.446923498 | 6.07E-23 |
| RP11-363E7.4 | MYOC       | -0.439199494 | 3.97E-22 |
| RP11-363E7.4 | DEPTOR     | -0.336827586 | 5.65E-13 |
| RP11-363E7.4 | DGKI       | -0.312505922 | 2.71E-11 |
| RP11-363E7.4 | CARTPT     | -0.450374994 | 2.58E-23 |
| RP11-363E7.4 | IYD        | -0.374975249 | 3.15E-16 |
| RP11-363E7.4 | LYVE1      | -0.399672356 | 0        |
| RP11-363E7.4 | CLCNKB     | -0.48473875  | 0        |
| RP11-363E7.4 | NCAM1      | -0.328140912 | 2.36E-12 |
| RP11-363E7.4 | HBA2       | -0.307910682 | 5.41E-11 |
| RP11-363E7.4 | GLT8D2     | -0.506768326 | 0        |
| RP11-363E7.4 | OGDHL      | -0.432824658 | 0        |
| RP11-363E7.4 | LIFR       | -0.545406179 | 0        |
| RP11-363E7.4 | CSGALNACT1 | -0.264084002 | 2.20E-08 |
| RP11-363E7.4 | RAP1GAP    | -0.500478984 | 0        |

|              |          |              |          |
|--------------|----------|--------------|----------|
| RP11-363E7.4 | COL9A3   | -0.38340151  | 7.04E-19 |
| RP11-363E7.4 | FBLN1    | -0.299104582 | 1.96E-10 |
| RP11-363E7.4 | EFEMP1   | -0.223876579 | 2.30E-06 |
| RP11-363E7.4 | AOX1     | -0.408690305 | 4.20E-19 |
| RP11-363E7.4 | GRIN2C   | -0.318248056 | 1.13E-11 |
| RP11-363E7.4 | C11orf74 | -0.437358624 | 0        |
| RP11-363E7.4 | PPARGC1A | -0.430338537 | 0        |
| RP11-363E7.4 | ANGPTL1  | -0.520817719 | 0        |
| RP11-363E7.4 | SCARA5   | -0.392536978 | 1.27E-17 |
| RP11-363E7.4 | LTF      | -0.405944252 | 0        |
| RP11-363E7.4 | CA4      | -0.506050526 | 6.34E-30 |
| RP11-363E7.4 | TG       | -0.552108693 | 0        |
| RP11-363E7.4 | FCGBP    | -0.321140541 | 7.17E-12 |
| RP11-363E7.4 | PBX4     | -0.430015006 | 0        |
| RP11-363E7.4 | CYR61    | -0.28230908  | 2.04E-09 |
| RP11-363E7.4 | FOS      | -0.21016802  | 9.40E-06 |
| RP11-363E7.4 | KHDRBS2  | -0.429892601 | 0        |
| RP11-363E7.4 | MUM1L1   | -0.254920614 | 6.80E-08 |
| RP11-363E7.4 | RGS16    | -0.456231473 | 0        |
| RP11-363E7.4 | MT1M     | -0.287635632 | 9.88E-10 |
| RP11-363E7.4 | LRP2     | -0.366136527 | 2.54E-15 |
| RP11-363E7.4 | MAFB     | -0.373771336 | 4.34E-16 |
| RP11-363E7.4 | KCNK2    | -0.33277459  | 1.11E-12 |
| RP11-363E7.4 | TBC1D4   | -0.514582559 | 0        |
| RP11-363E7.4 | MIOX     | -0.438300225 | 4.93E-22 |
| RP11-363E7.4 | TPPP     | -0.438361838 | 0        |
| RP11-363E7.4 | FMOD     | -0.387049986 | 0        |
| RP11-363E7.4 | CITED2   | -0.268317698 | 1.28E-08 |
| RP11-363E7.4 | RGS8     | -0.463842984 | 8.36E-25 |
| RP11-363E7.4 | ABI3BP   | -0.491819685 | 0        |
| RP11-363E7.4 | ADH1B    | -0.394397933 | 8.64E-18 |
| RP11-363E7.4 | OGN      | -0.380707305 | 1.37E-16 |
| RP11-363E7.4 | NR4A1    | -0.220395612 | 3.32E-06 |
| RP11-363E7.4 | FOXJ1    | -0.433959823 | 1.38E-21 |
| RP11-363E7.4 | ALDH1A1  | -0.407398934 | 0        |
| RP11-363E7.4 | OCA2     | -0.251250901 | 9.55E-08 |
| RP11-363E7.4 | TMEM139  | -0.215141256 | 5.70E-06 |
| RP11-363E7.4 | ARHGAP24 | -0.482466236 | 0        |
| RP11-363E7.4 | SLC25A15 | -0.395568724 | 0        |
| RP11-363E7.4 | DES      | -0.3193639   | 7.25E-12 |
| RP11-363E7.4 | GDF10    | -0.456091211 | 6.14E-24 |
| RP11-363E7.4 | KIAA1324 | -0.411037482 | 0        |
| RP11-363E7.4 | JUN      | -0.29197443  | 5.41E-10 |
| RP11-363E7.4 | C7       | -0.249256915 | 1.34E-07 |
| RP11-363E7.4 | LGI3     | -0.434130269 | 0        |
| RP11-363E7.4 | CDON     | -0.502684835 | 0        |
| RP11-363E7.4 | BCL2     | -0.383507037 | 0        |
| RP11-363E7.4 | HLF      | -0.542487171 | 0        |
| RP11-363E7.4 | EGR1     | -0.315517833 | 1.71E-11 |
| RP11-363E7.4 | IP6K3    | -0.318759095 | 1.04E-11 |
| RP11-363E7.4 | SCUBE3   | -0.304893807 | 8.46E-11 |

|              |          |              |             |
|--------------|----------|--------------|-------------|
| RP11-363E7.4 | PKNOX2   | -0.380985598 | 3.57E-17    |
| RP11-363E7.4 | SMAD9    | -0.211022731 | 8.63E-06    |
| RP11-363E7.4 | IQGAP2   | -0.33357214  | 9.72E-13    |
| RP11-363E7.4 | GNA14    | -0.280389598 | 2.64E-09    |
| RP11-363E7.4 | LAYN     | -0.404147176 | 0           |
| RP11-363E7.4 | AVPR1A   | -0.554023778 | 0           |
| RP11-363E7.4 | PDLIM3   | -0.366634659 | 2.29E-15    |
| RP11-363E7.4 | GPM6A    | -0.50851576  | 0           |
| RP11-363E7.4 | SDPR     | -0.515885901 | 0           |
| RP11-363E7.4 | CRYAB    | -0.296586406 | 2.82E-10    |
| RP11-363E7.4 | FOXA2    | -0.254209522 | 6.66E-08    |
| RP11-363E7.4 | C8orf88  | -0.555792061 | 0           |
| RP11-363E7.4 | ISM1     | -0.385399002 | 0           |
| RP11-363E7.4 | BMP2     | -0.165354862 | 0.000512139 |
| RP11-363E7.4 | ID4      | -0.283187477 | 1.81E-09    |
| RP11-363E7.4 | NUPR1    | -0.357375389 | 1.47E-14    |
| RP11-363E7.4 | SERTM1   | -0.360988215 | 5.87E-15    |
| RP11-363E7.4 | IRS1     | -0.53918194  | 0           |
| RP11-363E7.4 | FIBIN    | -0.424968441 | 0           |
| RP11-363E7.4 | PODN     | -0.362367772 | 5.54E-15    |
| RP11-363E7.4 | TDRD9    | -0.310733241 | 3.55E-11    |
| RP11-363E7.4 | EPHA3    | -0.442400083 | 0           |
| RP11-363E7.4 | AIF1L    | -0.2645749   | 2.06E-08    |
| RP11-363E7.4 | EBF4     | -0.303086092 | 1.10E-10    |
| RP11-363E7.4 | ADM2     | -0.337122749 | 5.38E-13    |
| RP11-363E7.4 | GSTM3    | -0.386450299 | 0           |
| RP11-363E7.4 | HSD17B6  | -0.19335564  | 4.69E-05    |
| RP11-363E7.4 | AGR3     | -0.182658215 | 0.000118781 |
| RP11-363E7.4 | EPHB1    | -0.540162318 | 0           |
| RP11-363E7.4 | TMOD1    | -0.367745669 | 1.80E-15    |
| RP11-363E7.4 | WASF3    | -0.464195486 | 0           |
| RP11-363E7.4 | SELV     | -0.337330164 | 3.82E-13    |
| RP11-363E7.4 | ENPP1    | -0.433175847 | 0           |
| RP11-363E7.4 | SYNE1    | -0.461330747 | 1.60E-24    |
| RP11-363E7.4 | PLCH1    | -0.46826224  | 0           |
| RP11-363E7.4 | CCDC146  | -0.441509346 | 0           |
| RP11-363E7.4 | SLC16A2  | -0.440183878 | 0           |
| RP11-363E7.4 | IER2     | -0.288357441 | 8.94E-10    |
| RP11-363E7.4 | KCNAB1   | -0.397038441 | 0           |
| RP11-363E7.4 | SYNDIG1  | -0.437682438 | 0           |
| RP11-363E7.4 | C16orf89 | -0.459272886 | 0           |
| RP11-363E7.4 | CTGF     | -0.177837381 | 0.00018422  |
| RP11-363E7.4 | NR4A3    | -0.19208024  | 5.27E-05    |
| RP11-363E7.4 | KIAA1456 | -0.507626583 | 0           |
| RP11-363E7.4 | AQP4     | -0.504871113 | 0           |
| RP11-363E7.4 | RNF150   | -0.413462897 | 0           |
| RP11-363E7.4 | C1S      | -0.244965775 | 2.21E-07    |
| RP11-363E7.4 | PFKFB2   | -0.518166925 | 0           |
| RP11-363E7.4 | PROX1    | -0.498603897 | 0           |
| RP11-363E7.4 | TCF7L1   | -0.42334781  | 0           |
| RP11-363E7.4 | HSPB6    | -0.418121963 | 0           |

|              |          |              |             |
|--------------|----------|--------------|-------------|
| RP11-363E7.4 | FHDC1    | -0.482649773 | 0           |
| RP11-363E7.4 | PRR15L   | -0.50504543  | 0           |
| RP11-363E7.4 | SLC1A1   | -0.425113824 | 0           |
| RP11-363E7.4 | BTBD11   | -0.528037088 | 0           |
| RP11-363E7.4 | TRIM58   | -0.354576091 | 2.49E-14    |
| RP11-363E7.4 | LRIG1    | -0.47925405  | 0           |
| RP11-363E7.4 | ROR2     | -0.21830082  | 4.12E-06    |
| RP11-363E7.4 | GPR125   | -0.376635028 | 1.95E-16    |
| RP11-363E7.4 | FLRT1    | -0.397286514 | 0           |
| RP11-363E7.4 | PGF      | -0.215005517 | 5.78E-06    |
| RP11-363E7.4 | DUSP1    | -0.174575552 | 0.000242257 |
| RP11-363E7.4 | PLA2G7   | -0.2875745   | 9.96E-10    |
| RP11-363E7.4 | PLSCR4   | -0.449459884 | 0           |
| RP11-363E7.4 | FAM46B   | -0.257550274 | 4.94E-08    |
| RP11-363E7.4 | GLDC     | -0.205880142 | 1.43E-05    |
| RP11-363E7.4 | ZBTB16   | -0.474285921 | 0           |
| RP11-363E7.4 | OMD      | -0.328347008 | 1.71E-12    |
| RP11-363E7.4 | HSD11B2  | -0.507275819 | 0           |
| RP11-363E7.4 | FGL2     | -0.306131194 | 7.05E-11    |
| RP11-363E7.4 | CLCNKA   | -0.451116274 | 2.15E-23    |
| RP11-363E7.4 | GATM     | -0.500517138 | 0           |
| RP11-363E7.4 | TNS3     | -0.375427143 | 2.78E-16    |
| RP11-363E7.4 | TOB1     | -0.117364411 | 0.013912484 |
| RP11-363E7.4 | MARC2    | -0.504520775 | 0           |
| RP11-363E7.4 | LRRC2    | -0.412554856 | 0           |
| RP11-363E7.4 | SORD     | -0.408519731 | 0           |
| RP11-363E7.4 | RIMS4    | -0.433670433 | 0           |
| RP11-363E7.4 | SLC29A4  | -0.315138419 | 1.82E-11    |
| RP11-363E7.4 | SLC39A14 | -0.52345745  | 0           |
| RP11-363E7.4 | FAXDC2   | -0.449329252 | 0           |
| RP11-363E7.4 | HSPB8    | -0.053448202 | 0.263679544 |
| RP11-363E7.4 | CCL19    | -0.134788464 | 0.004669363 |
| RP11-363E7.4 | KCNIP3   | -0.470297461 | 0           |
| RP11-363E7.4 | CGNL1    | -0.404668286 | 0           |
| RP11-363E7.4 | ATF3     | -0.024841213 | 0.603572041 |
| RP11-363E7.4 | SGCD     | -0.174300956 | 0.000247853 |
| RP11-363E7.4 | STARD13  | -0.365374152 | 2.99E-15    |
| RP11-363E7.4 | LDHD     | -0.499384711 | 0           |
| RP11-363E7.4 | RCAN1    | -0.156444654 | 0.001018822 |
| RP11-363E7.4 | ID3      | -0.083003515 | 0.082361139 |
| RP11-363E7.4 | SYTL3    | -0.552728946 | 0           |
| RP11-363E7.4 | MT1E     | -0.130819648 | 0.006083444 |
| RP11-363E7.4 | CAMK1D   | -0.591784935 | 0           |
| RP11-363E7.4 | PRKCQ    | -0.536249883 | 0           |
| RP11-363E7.4 | NUAK2    | -0.283630293 | 1.71E-09    |
| RP11-363E7.4 | LIPG     | -0.476189375 | 0           |
| RP11-363E7.4 | SLC25A25 | -0.329910189 | 1.77E-12    |
| RP11-363E7.4 | PRKX     | -0.331780879 | 1.30E-12    |
| RP11-363E7.4 | SRPX     | -0.285478289 | 1.33E-09    |
| RP11-363E7.4 | FAM189A1 | -0.527996806 | 0           |
| RP11-363E7.4 | PLEKHH1  | -0.334905692 | 7.79E-13    |



|              |          |              |             |
|--------------|----------|--------------|-------------|
| RP11-363E7.4 | WNT11    | -0.387446847 | 0           |
| RP11-363E7.4 | SNAI1    | -0.244735573 | 2.27E-07    |
| RP11-363E7.4 | FDCSP    | -0.135948707 | 0.004322967 |
| RP11-363E7.4 | MT1X     | -0.353787761 | 2.88E-14    |
| RP11-363E7.4 | ACACB    | -0.534891934 | 0           |
| RP11-363E7.4 | ARC      | -0.243335357 | 2.67E-07    |
| RP11-363E7.4 | KLK4     | -0.28190293  | 1.83E-09    |
| RP11-363E7.4 | ZFPM2    | -0.407327874 | 0           |
| RP11-363E7.4 | AKAP12   | -0.325365727 | 3.68E-12    |
| RP11-363E7.4 | GJB6     | -0.252662177 | 8.05E-08    |
| RP11-363E7.4 | ERO1LB   | -0.357043916 | 1.57E-14    |
| RP11-363E7.4 | DNALI1   | -0.299931067 | 1.74E-10    |
| RP11-363E7.4 | HKDC1    | -0.283133012 | 1.83E-09    |
| RP11-363E7.4 | ZFP36L2  | -0.336381082 | 6.09E-13    |
| RP11-363E7.4 | CAPSL    | -0.416387457 | 7.74E-20    |
| RP11-363E7.4 | CYP7B1   | -0.418293444 | 0           |
| RP11-363E7.4 | CPQ      | -0.267540431 | 1.42E-08    |
| RP11-363E7.4 | RPS6KA6  | -0.438287318 | 4.94E-22    |
| RP11-363E7.4 | TLE1     | -0.293999864 | 4.07E-10    |
| RP11-363E7.4 | TP53INP2 | -0.395085769 | 0           |
| RP11-363E7.4 | KATNAL2  | -0.46932843  | 0           |
| RP11-363E7.4 | SGPP2    | -0.289123645 | 8.04E-10    |
| RP11-363E7.4 | CTH      | -0.267011946 | 1.52E-08    |
| RP11-363E7.4 | KIF12    | -0.172910384 | 0.0002781   |
| RP11-363E7.4 | TMEM220  | -0.439716666 | 0           |
| RP11-363E7.4 | CENPJ    | -0.218493434 | 4.04E-06    |
| RP11-363E7.4 | FAM155B  | -0.431698329 | 0           |
| RP11-363E7.4 | WFS1     | -0.304250859 | 9.30E-11    |
| RP11-363E7.4 | SELENBP1 | -0.570613048 | 0           |
| RP11-363E7.4 | SNTA1    | -0.437523722 | 0           |
| RP11-363E7.4 | FRAS1    | -0.06667026  | 0.163116942 |
| RP11-363E7.4 | FBLN7    | -0.351172142 | 4.66E-14    |
| RP11-363E7.4 | AGPAT9   | -0.362883634 | 4.99E-15    |
| RP11-363E7.4 | GPR83    | -0.385057742 | 0           |
| RP11-363E7.4 | PRTG     | -0.395898921 | 0           |
| RP11-363E7.4 | EGR3     | -0.262455144 | 2.69E-08    |
| RP11-363E7.4 | GRAMD2   | -0.108615046 | 0.0228881   |
| RP11-363E7.4 | HYOU1    | -0.370170091 | 1.04E-15    |
| RP11-363E7.4 | FBLN5    | -0.375376932 | 2.81E-16    |
| RP11-363E7.4 | ITM2A    | -0.413829546 | 0           |
| RP11-363E7.4 | SRF      | -0.330824329 | 1.53E-12    |
| RP11-363E7.4 | FGFR2    | -0.349955605 | 5.80E-14    |
| RP11-363E7.4 | MT1A     | -0.261466974 | 2.70E-08    |
| RP11-363E7.4 | MAMDC2   | -0.22344582  | 2.41E-06    |
| RP11-363E7.4 | FHL2     | -0.264742268 | 2.02E-08    |
| RP11-363E7.4 | FTCDNL1  | -0.51623638  | 0           |
| RP11-363E7.4 | PKIA     | -0.457155541 | 0           |
| RP11-363E7.4 | DNAJB4   | -0.340946961 | 2.81E-13    |
| RP11-363E7.4 | SLC25A33 | -0.407429996 | 0           |
| RP11-363E7.4 | EYA2     | -0.355955032 | 1.92E-14    |
| RP11-363E7.4 | LPAR1    | -0.237540317 | 5.17E-07    |

|              |          |              |             |
|--------------|----------|--------------|-------------|
| RP11-363E7.4 | STX11    | -0.301869272 | 1.32E-10    |
| RP11-363E7.4 | ARHGEF28 | -0.380785182 | 3.99E-17    |
| RP11-363E7.4 | OR2W3    | -0.328905982 | 2.08E-12    |
| RP11-363E7.4 | ALDH1B1  | -0.504731705 | 9.40E-30    |
| RP11-363E7.4 | CXCL12   | -0.368211604 | 1.62E-15    |
| RP11-363E7.4 | OLFM2    | -0.307699203 | 5.58E-11    |
| RP11-363E7.4 | TUB      | -0.450839534 | 0           |
| RP11-363E7.4 | HTRA3    | -0.202251948 | 2.04E-05    |
| RP11-363E7.4 | CKB      | -0.240842144 | 3.56E-07    |
| RP11-363E7.4 | RGS2     | -0.179265255 | 0.000163162 |
| RP11-363E7.4 | SHANK2   | -0.359580105 | 9.61E-15    |
| RP11-363E7.4 | CNTFR    | -0.462116949 | 1.31E-24    |
| RP11-363E7.4 | CYTH3    | -0.534214804 | 0           |
| RP11-363E7.4 | PLAC9    | -0.359880942 | 9.06E-15    |
| RP11-363E7.4 | WWOX     | -0.549375349 | 0           |
| RP11-363E7.4 | NPR3     | -0.162386495 | 0.000646516 |
| RP11-363E7.4 | SDC2     | -0.206237997 | 1.38E-05    |
| RP11-363E7.4 | KLF15    | -0.479976994 | 0           |
| RP11-363E7.4 | TMEM164  | -0.360342764 | 8.28E-15    |
| RP11-363E7.4 | LONRF3   | -0.327489171 | 2.62E-12    |
| RP11-363E7.4 | GBP1     | -0.149392937 | 0.00171339  |
| RP11-363E7.4 | ARHGAP6  | -0.328293104 | 2.30E-12    |
| RP11-363E7.4 | TMEM119  | -0.312576273 | 2.68E-11    |
| RP11-363E7.4 | SH3RF1   | -0.399943123 | 0           |
| RP11-363E7.4 | CRELD2   | -0.331198779 | 1.43E-12    |
| RP11-363E7.4 | PCP4     | -0.241689621 | 3.23E-07    |
| RP11-363E7.4 | GCSH     | -0.496855045 | 0           |
| RP11-363E7.4 | IMPA2    | -0.334521314 | 8.30E-13    |
| RP11-363E7.4 | C1R      | -0.18375284  | 0.000110751 |
| RP11-363E7.4 | SUCNR1   | -0.3636531   | 4.27E-15    |
| RP11-363E7.4 | SFRP1    | -0.350312751 | 5.44E-14    |
| RP11-363E7.4 | UGT8     | -0.39176295  | 0           |
| RP11-363E7.4 | TLE4     | -0.288144402 | 9.21E-10    |
| RP11-363E7.4 | ANTXR1   | -0.372794929 | 5.56E-16    |
| RP11-363E7.4 | GPX3     | -0.126241855 | 0.008129246 |
| RP11-363E7.4 | DPY19L2  | -0.303170627 | 1.09E-10    |
| RP11-363E7.4 | FAM46C   | -0.432544246 | 0           |
| RP11-363E7.4 | IL33     | -0.250660119 | 1.03E-07    |
| RP11-363E7.4 | PEG3     | -0.409594147 | 0           |
| RP11-363E7.4 | FAHD2A   | -0.461837727 | 0           |
| RP11-363E7.4 | PTGDS    | -0.28709509  | 1.06E-09    |
| RP11-363E7.4 | CHCHD10  | -0.3187703   | 1.04E-11    |
| RP11-363E7.4 | CD36     | -0.463467294 | 0           |
| RP11-363E7.4 | ANKRD37  | -0.255206132 | 6.57E-08    |
| RP11-363E7.4 | TSPAN33  | -0.380028055 | 5.76E-17    |
| RP11-363E7.4 | PRDM16   | -0.394764791 | 0           |
| RP11-363E7.4 | UST      | -0.556163674 | 0           |
| RP11-363E7.4 | NEXN     | -0.442299946 | 0           |
| RP11-363E7.4 | NUPR1L   | -0.258017293 | 4.16E-08    |
| RP11-363E7.4 | SLC24A3  | -0.339768011 | 3.44E-13    |
| RP11-363E7.4 | MARC1    | -0.417641419 | 0           |

|              |          |              |             |
|--------------|----------|--------------|-------------|
| RP11-363E7.4 | MYH11    | -0.284675775 | 1.48E-09    |
| RP11-363E7.4 | APOA1    | -0.322547506 | 4.37E-12    |
| RP11-363E7.4 | TMEM178B | -0.147108934 | 0.00201826  |
| RP11-363E7.4 | CAPN6    | -0.197101982 | 3.20E-05    |
| RP11-363E7.4 | PPM1L    | -0.408582707 | 0           |
| RP11-363E7.4 | FZD8     | -0.33865927  | 4.15E-13    |
| RP11-363E7.4 | RCAN2    | -0.428505008 | 0           |
| RP11-363E7.4 | COPZ2    | -0.43363086  | 0           |
| RP11-363E7.4 | GAS1     | -0.37124933  | 8.11E-16    |
| RP11-363E7.4 | DACT1    | -0.247881237 | 1.57E-07    |
| RP11-363E7.4 | WBSCR17  | -0.332828062 | 1.10E-12    |
| RP11-363E7.4 | NCS1     | -0.25552484  | 6.32E-08    |
| RP11-363E7.4 | SPIRE2   | -0.247135315 | 1.72E-07    |
| RP11-363E7.4 | C15orf52 | -0.262893704 | 2.55E-08    |
| RP11-363E7.4 | SPAG5    | -0.284214804 | 1.58E-09    |
| RP11-363E7.4 | ARL4D    | -0.328941157 | 2.07E-12    |
| RP11-363E7.4 | FAM189A2 | -0.298915371 | 2.02E-10    |
| RP11-363E7.4 | MAP1LC3A | -0.395533832 | 0           |
| RP11-363E7.4 | KLF6     | -0.061985379 | 0.194798583 |
| RP11-363E7.4 | ADD3     | -0.516785999 | 0           |
| RP11-363E7.4 | TSPAN7   | -0.44663151  | 0           |
| RP11-363E7.4 | KLF9     | -0.461215346 | 0           |
| RP11-363E7.4 | KCNQ1    | -0.549793201 | 0           |
| RP11-363E7.4 | MAN1A1   | -0.190992917 | 5.81E-05    |
| RP11-363E7.4 | MLF1     | -0.349095505 | 6.77E-14    |
| RP11-363E7.4 | RARB     | -0.478462883 | 0           |
| RP11-363E7.4 | CDC42EP2 | -0.310320212 | 3.77E-11    |
| RP11-363E7.4 | FAM3B    | -0.175122476 | 0.00023146  |
| RP11-363E7.4 | GADD45B  | -0.204410993 | 1.65E-05    |
| RP11-363E7.4 | TMEM47   | -0.346119336 | 1.15E-13    |
| RP11-363E7.4 | SDF2L1   | -0.267413203 | 1.44E-08    |
| RP11-363E7.4 | CCDC85A  | -0.222843721 | 2.57E-06    |
| RP11-363E7.4 | CRYBG3   | -0.161165277 | 0.000710759 |
| RP11-363E7.4 | FBLN2    | -0.267598442 | 1.41E-08    |
| RP11-363E7.4 | PEBP4    | -0.39998922  | 0           |
| RP11-363E7.4 | CDADC1   | -0.541448781 | 0           |
| RP11-363E7.4 | FAM63A   | -0.521026362 | 0           |
| RP11-363E7.4 | GLUL     | -0.314199457 | 2.10E-11    |
| RP11-363E7.4 | FREM2    | -0.313628137 | 2.29E-11    |
| RP11-363E7.4 | ACKR3    | -0.347907619 | 8.37E-14    |
| RP11-363E7.4 | DENND6A  | -0.437923561 | 0           |
| RP11-363E7.4 | CLDN8    | -0.017569224 | 0.713441508 |
| RP11-363E7.4 | UTS2R    | 0.001497312  | 0.975044046 |
| RP11-363E7.4 | SCNN1B   | -0.364465402 | 3.61E-15    |
| RP11-363E7.4 | TTC30A   | -0.365626906 | 2.83E-15    |
| RP11-363E7.4 | CORO2B   | -0.48858438  | 0           |
| RP11-363E7.4 | TC2N     | -0.139226477 | 0.003491133 |
| RP11-363E7.4 | ALDH2    | -0.493730515 | 0           |
| RP11-363E7.4 | GPR183   | -0.123210086 | 0.009802568 |
| RP11-363E7.4 | C4orf47  | -0.362718252 | 5.16E-15    |
| RP11-363E7.4 | SLC25A42 | -0.468078135 | 0           |

|              |          |              |             |
|--------------|----------|--------------|-------------|
| RP11-363E7.4 | LGMN     | -0.376477872 | 2.05E-16    |
| RP11-363E7.4 | ACSF2    | -0.320040736 | 8.52E-12    |
| RP11-363E7.4 | KIAA1467 | -0.455465694 | 0           |
| RP11-363E7.4 | PRKG1    | -0.479217314 | 0           |
| RP11-363E7.4 | GNAI1    | -0.367254487 | 2.00E-15    |
| RP11-363E7.4 | ABCC4    | -0.380557392 | 4.48E-17    |
| RP11-363E7.4 | PRPS1    | -0.54549582  | 0           |
| RP11-363E7.4 | TSPAN5   | -0.115614992 | 0.015407165 |
| RP11-363E7.4 | CR2      | -0.182891206 | 0.000116383 |
| RP11-363E7.4 | CCDC170  | -0.310406165 | 3.73E-11    |
| RP11-363E7.4 | RRAD     | 0.009015452  | 0.850535476 |
| RP11-363E7.4 | SCGB2A1  | -0.268814695 | 1.20E-08    |
| RP11-363E7.4 | SESN3    | -0.31191517  | 2.97E-11    |
| RP11-363E7.4 | SGK223   | -0.193855048 | 4.48E-05    |
| RP11-363E7.4 | NDRG2    | -0.590138773 | 0           |
| RP11-363E7.4 | C3orf52  | -0.093899159 | 0.049309908 |
| RP11-363E7.4 | FLRT3    | 0.361494907  | 6.59E-15    |
| RP11-363E7.4 | MST1R    | 0.466702031  | 0           |
| RP11-363E7.4 | SDC1     | 0.449510804  | 0           |
| RP11-363E7.4 | ST8SIA4  | 0.505284142  | 0           |
| RP11-363E7.4 | UBTD1    | 0.394070641  | 0           |
| RP11-363E7.4 | EPHA2    | 0.488819546  | 0           |
| RP11-363E7.4 | TMEM130  | 0.261185276  | 3.15E-08    |
| RP11-363E7.4 | SPINK2   | 0.291302831  | 5.94E-10    |
| RP11-363E7.4 | MMP16    | 0.57980296   | 0           |
| RP11-363E7.4 | SIGLEC15 | 0.396747958  | 0           |
| RP11-363E7.4 | RIN1     | 0.437200617  | 0           |
| RP11-363E7.4 | IL1RN    | 0.387967105  | 0           |
| RP11-363E7.4 | FCER1G   | 0.189822193  | 6.46E-05    |
| RP11-363E7.4 | CD276    | 0.467186689  | 0           |
| RP11-363E7.4 | CTSB     | 0.206693152  | 1.32E-05    |
| RP11-363E7.4 | FAM171A2 | 0.168894408  | 0.000385941 |
| RP11-363E7.4 | ASPHD1   | 0.435474318  | 0           |
| RP11-363E7.4 | C15orf48 | 0.314909352  | 1.88E-11    |
| RP11-363E7.4 | DYSF     | 0.159819952  | 0.000788349 |
| RP11-363E7.4 | PDZRN4   | -0.017403842 | 0.716021778 |
| RP11-363E7.4 | EFHD2    | 0.308049115  | 5.30E-11    |
| RP11-363E7.4 | ASF1B    | 0.371990996  | 6.78E-16    |
| RP11-363E7.4 | AQP1     | 0.101949835  | 0.032752999 |
| RP11-363E7.4 | ARRDC2   | 0.373359866  | 4.82E-16    |
| RP11-363E7.4 | PRSS1    | 0.166700104  | 0.000452562 |
| RP11-363E7.4 | MAPK13   | 0.485765509  | 0           |
| RP11-363E7.4 | CST5     | 0.598461364  | 5.32E-44    |
| RP11-363E7.4 | AHR      | 0.512173314  | 0           |
| RP11-363E7.4 | BAX      | 0.584875907  | 0           |
| RP11-363E7.4 | C1orf115 | 0.06632361   | 0.165319488 |
| RP11-363E7.4 | PLK3     | 0.469174394  | 0           |
| RP11-363E7.4 | JAG2     | 0.362643078  | 5.24E-15    |
| RP11-363E7.4 | RAD23B   | 0.278800739  | 3.27E-09    |
| RP11-363E7.4 | CA12     | 0.082889194  | 0.082785336 |
| RP11-363E7.4 | ADTRP    | 0.16575073   | 0.000496324 |

|              |          |             |             |
|--------------|----------|-------------|-------------|
| RP11-363E7.4 | UCP2     | 0.341946771 | 2.37E-13    |
| RP11-363E7.4 | IGFBP2   | 0.387684991 | 0           |
| RP11-363E7.4 | LOXL2    | 0.269633947 | 1.08E-08    |
| RP11-363E7.4 | GPX1     | 0.480898084 | 0           |
| RP11-363E7.4 | P3H3     | 0.455624693 | 0           |
| RP11-363E7.4 | C2orf81  | 0.241851457 | 3.17E-07    |
| RP11-363E7.4 | CDT1     | 0.411499587 | 0           |
| RP11-363E7.4 | SNX25    | 0.341965919 | 2.36E-13    |
| RP11-363E7.4 | MTHFD1L  | 0.616435945 | 0           |
| RP11-363E7.4 | CDC42BPG | 0.547219799 | 1.17E-35    |
| RP11-363E7.4 | MSN      | 0.286439945 | 1.16E-09    |
| RP11-363E7.4 | SIGLEC6  | 0.309248712 | 3.49E-11    |
| RP11-363E7.4 | F2R      | 0.440806259 | 0           |
| RP11-363E7.4 | TMEM184A | 0.592877648 | 0           |
| RP11-363E7.4 | CKS2     | 0.458795179 | 0           |
| RP11-363E7.4 | TAX1BP3  | 0.606065098 | 0           |
| RP11-363E7.4 | PMEP1    | 0.331162752 | 1.44E-12    |
| RP11-363E7.4 | CXCL16   | 0.469935067 | 0           |
| RP11-363E7.4 | FAXC     | 0.663759336 | 0           |
| RP11-363E7.4 | VTCN1    | 0.587892197 | 3.71E-42    |
| RP11-363E7.4 | SH2D4A   | 0.497170491 | 0           |
| RP11-363E7.4 | RNF24    | 0.439824746 | 0           |
| RP11-363E7.4 | LY6G6C   | 0.399739587 | 2.84E-18    |
| RP11-363E7.4 | NID1     | 0.395731695 | 0           |
| RP11-363E7.4 | STAC     | 0.505777594 | 0           |
| RP11-363E7.4 | RAB34    | 0.418968447 | 0           |
| RP11-363E7.4 | HES4     | 0.357968836 | 1.31E-14    |
| RP11-363E7.4 | EPHA10   | 0.327011605 | 2.83E-12    |
| RP11-363E7.4 | ENTPD2   | 0.189715815 | 6.53E-05    |
| RP11-363E7.4 | DDB2     | 0.622014683 | 0           |
| RP11-363E7.4 | NKAIN4   | 0.395735525 | 0           |
| RP11-363E7.4 | TRIM29   | 0.564123149 | 0           |
| RP11-363E7.4 | ADCY8    | 0.310931733 | 2.70E-11    |
| RP11-363E7.4 | SFTA2    | 0.510828272 | 0           |
| RP11-363E7.4 | NRIP1    | 0.342849565 | 2.03E-13    |
| RP11-363E7.4 | VWA1     | 0.244524803 | 2.33E-07    |
| RP11-363E7.4 | APLNR    | 0.135809904 | 0.004390858 |
| RP11-363E7.4 | REN      | 0.286306537 | 9.96E-10    |
| RP11-363E7.4 | EDIL3    | 0.264425545 | 2.10E-08    |
| RP11-363E7.4 | AGR1     | 0.488157167 | 0           |
| RP11-363E7.4 | TREM1    | 0.450935132 | 0           |
| RP11-363E7.4 | SRL      | 0.398149167 | 0           |
| RP11-363E7.4 | RASGRF1  | 0.374236987 | 3.84E-16    |
| RP11-363E7.4 | RMI2     | 0.401388018 | 0           |
| RP11-363E7.4 | SAMD1    | 0.470049813 | 0           |
| RP11-363E7.4 | MGAT4B   | 0.462364652 | 0           |
| RP11-363E7.4 | NXN      | 0.562474859 | 0           |
| RP11-363E7.4 | SH3BGRL3 | 0.371023383 | 8.55E-16    |
| RP11-363E7.4 | CA11     | 0.130748588 | 0.006111291 |
| RP11-363E7.4 | PLD3     | 0.308016493 | 5.33E-11    |
| RP11-363E7.4 | LURAP1L  | 0.327113586 | 2.78E-12    |

|              |          |             |             |
|--------------|----------|-------------|-------------|
| RP11-363E7.4 | CARNS1   | 0.319206875 | 9.70E-12    |
| RP11-363E7.4 | PDLIM7   | 0.251470142 | 1.03E-07    |
| RP11-363E7.4 | BCL2L1   | 0.69149119  | 0           |
| RP11-363E7.4 | GGT6     | 0.313153408 | 2.46E-11    |
| RP11-363E7.4 | DPYSL3   | 0.492429443 | 0           |
| RP11-363E7.4 | FYN      | 0.459848745 | 0           |
| RP11-363E7.4 | TK1      | 0.328676206 | 2.16E-12    |
| RP11-363E7.4 | AK1      | 0.252448393 | 9.15E-08    |
| RP11-363E7.4 | HIGD1B   | 0.075928679 | 0.112119085 |
| RP11-363E7.4 | TMEM59L  | 0.495419654 | 0           |
| RP11-363E7.4 | MEGF9    | 0.347541537 | 8.93E-14    |
| RP11-363E7.4 | ZFP36L1  | 0.460361628 | 0           |
| RP11-363E7.4 | ADRA1B   | 0.296675196 | 2.78E-10    |
| RP11-363E7.4 | EPHA4    | 0.517253069 | 0           |
| RP11-363E7.4 | TCERG1L  | 0.286108471 | 1.22E-09    |
| RP11-363E7.4 | NGFR     | 0.00637643  | 0.893976193 |
| RP11-363E7.4 | EBI3     | 0.361265272 | 6.90E-15    |
| RP11-363E7.4 | S100A10  | 0.507110579 | 0           |
| RP11-363E7.4 | S100B    | 0.207576372 | 1.21E-05    |
| RP11-363E7.4 | CD44     | 0.171751433 | 0.000305908 |
| RP11-363E7.4 | BHLHE41  | 0.235573462 | 6.45E-07    |
| RP11-363E7.4 | FBXO2    | 0.267496887 | 1.43E-08    |
| RP11-363E7.4 | SLC30A2  | 0.431477205 | 0           |
| RP11-363E7.4 | FRMD5    | 0.361699719 | 6.33E-15    |
| RP11-363E7.4 | SAMD11   | 0.349971633 | 5.78E-14    |
| RP11-363E7.4 | SIPA1L2  | 0.373617301 | 4.52E-16    |
| RP11-363E7.4 | S100A16  | 0.542750988 | 0           |
| RP11-363E7.4 | PPL      | 0.541537429 | 0           |
| RP11-363E7.4 | ARHGDIB  | 0.354807995 | 2.38E-14    |
| RP11-363E7.4 | CDC42EP3 | 0.573926648 | 0           |
| RP11-363E7.4 | RUNX2    | 0.173367951 | 0.000267786 |
| RP11-363E7.4 | LAMC2    | 0.536059396 | 0           |
| RP11-363E7.4 | BRINP1   | 0.18783931  | 7.72E-05    |
| RP11-363E7.4 | GPRC5B   | 0.282106111 | 2.10E-09    |
| RP11-363E7.4 | AQP5     | 0.267250374 | 1.47E-08    |
| RP11-363E7.4 | PLAG1    | 0.329491769 | 1.89E-12    |
| RP11-363E7.4 | PTPRU    | 0.605162872 | 0           |
| RP11-363E7.4 | ANGPTL4  | 0.396236352 | 0           |
| RP11-363E7.4 | PALM3    | 0.185808202 | 9.25E-05    |
| RP11-363E7.4 | ACP5     | 0.320312779 | 8.16E-12    |
| RP11-363E7.4 | DLG4     | 0.177678949 | 0.000186707 |
| RP11-363E7.4 | ETNK2    | 0.172049859 | 0.000298509 |
| RP11-363E7.4 | CD109    | 0.443588536 | 0           |
| RP11-363E7.4 | SNX22    | 0.111727236 | 0.019242452 |
| RP11-363E7.4 | TMEM98   | 0.410701895 | 0           |
| RP11-363E7.4 | CTHRC1   | 0.307362765 | 5.87E-11    |
| RP11-363E7.4 | S100A2   | 0.46569981  | 0           |
| RP11-363E7.4 | C11orf80 | 0.506982784 | 0           |
| RP11-363E7.4 | SREBF1   | 0.513953228 | 0           |
| RP11-363E7.4 | PRSS22   | 0.526426243 | 0           |
| RP11-363E7.4 | CMTM3    | 0.476768922 | 0           |

|              |          |             |             |
|--------------|----------|-------------|-------------|
| RP11-363E7.4 | RDH5     | 0.226913312 | 1.66E-06    |
| RP11-363E7.4 | MYH10    | 0.319022771 | 9.98E-12    |
| RP11-363E7.4 | EVPL     | 0.564570219 | 0           |
| RP11-363E7.4 | SCD      | 0.366352687 | 2.43E-15    |
| RP11-363E7.4 | CD151    | 0.439597807 | 0           |
| RP11-363E7.4 | S100A4   | 0.351114698 | 4.70E-14    |
| RP11-363E7.4 | BNIP1    | 0.246554776 | 1.84E-07    |
| RP11-363E7.4 | MAP3K6   | 0.350957117 | 4.84E-14    |
| RP11-363E7.4 | MANEAL   | 0.3060529   | 7.13E-11    |
| RP11-363E7.4 | CD207    | 0.235364561 | 6.11E-07    |
| RP11-363E7.4 | CD1A     | 0.275685906 | 4.25E-09    |
| RP11-363E7.4 | C3       | 0.328818185 | 2.11E-12    |
| RP11-363E7.4 | NT5E     | 0.525191693 | 0           |
| RP11-363E7.4 | CACNG4   | 0.582926911 | 2.59E-41    |
| RP11-363E7.4 | FHOD1    | 0.35889716  | 1.10E-14    |
| RP11-363E7.4 | LEMD1    | 0.292082509 | 5.33E-10    |
| RP11-363E7.4 | ATP11A   | 0.349804407 | 5.96E-14    |
| RP11-363E7.4 | PPAP2C   | 0.450197154 | 0           |
| RP11-363E7.4 | DRAM1    | 0.632126961 | 0           |
| RP11-363E7.4 | CDA      | 0.3008184   | 1.53E-10    |
| RP11-363E7.4 | CCND2    | 0.346592505 | 1.06E-13    |
| RP11-363E7.4 | LCN6     | 0.105938583 | 0.026447252 |
| RP11-363E7.4 | CDH4     | 0.317634894 | 1.24E-11    |
| RP11-363E7.4 | MMP11    | 0.421631014 | 0           |
| RP11-363E7.4 | B3GAT1   | 0.464473061 | 0           |
| RP11-363E7.4 | SPP1     | 0.229399859 | 1.27E-06    |
| RP11-363E7.4 | HLA-DQB1 | 0.182220999 | 0.000126541 |
| RP11-363E7.4 | SDC3     | 0.430539804 | 0           |
| RP11-363E7.4 | CX3CL1   | 0.517176051 | 0           |
| RP11-363E7.4 | SDK1     | 0.397704508 | 0           |
| RP11-363E7.4 | DOCK9    | 0.358965951 | 1.08E-14    |
| RP11-363E7.4 | CSF2     | 0.453095436 | 1.31E-23    |
| RP11-363E7.4 | GRHL3    | 0.663673099 | 0           |
| RP11-363E7.4 | TMEM92   | 0.42403721  | 1.38E-20    |
| RP11-363E7.4 | BASP1    | 0.458850353 | 0           |
| RP11-363E7.4 | HRH1     | 0.611716173 | 0           |
| RP11-363E7.4 | ESM1     | 0.365622509 | 2.84E-15    |
| RP11-363E7.4 | B4GALNT3 | 0.414943535 | 0           |
| RP11-363E7.4 | LMO3     | 0.367373914 | 1.95E-15    |
| RP11-363E7.4 | C9orf16  | 0.465004099 | 0           |
| RP11-363E7.4 | SEMA3F   | 0.317109955 | 1.34E-11    |
| RP11-363E7.4 | PLA2G12B | 0.14304518  | 0.002664142 |
| RP11-363E7.4 | KLK6     | 0.406163084 | 7.24E-19    |
| RP11-363E7.4 | ST3GAL5  | 0.325711668 | 3.48E-12    |
| RP11-363E7.4 | FAM132B  | 0.179366101 | 0.000161764 |
| RP11-363E7.4 | CDKN1A   | 0.614505683 | 0           |
| RP11-363E7.4 | E2F1     | 0.45704505  | 0           |
| RP11-363E7.4 | B3GNT8   | 0.403693013 | 0           |
| RP11-363E7.4 | MTMR11   | 0.402529665 | 0           |
| RP11-363E7.4 | MYO1G    | 0.46654984  | 0           |
| RP11-363E7.4 | TMSB10   | 0.439028047 | 0           |

|              |          |             |             |
|--------------|----------|-------------|-------------|
| RP11-363E7.4 | UNC5CL   | 0.423473903 | 0           |
| RP11-363E7.4 | ABR      | 0.462785908 | 0           |
| RP11-363E7.4 | PLP2     | 0.427996522 | 0           |
| RP11-363E7.4 | SRCIN1   | 0.224064088 | 2.25E-06    |
| RP11-363E7.4 | PDE9A    | 0.532638568 | 0           |
| RP11-363E7.4 | TREM2    | 0.266188155 | 1.68E-08    |
| RP11-363E7.4 | KDELR3   | 0.545252144 | 0           |
| RP11-363E7.4 | PC       | 0.255411512 | 6.40E-08    |
| RP11-363E7.4 | C2CD4A   | 0.35496742  | 2.31E-14    |
| RP11-363E7.4 | PELI1    | 0.510108023 | 0           |
| RP11-363E7.4 | SSX1     | 0.428762017 | 0           |
| RP11-363E7.4 | MROH6    | 0.517597307 | 0           |
| RP11-363E7.4 | ESPN     | 0.289873396 | 7.25E-10    |
| RP11-363E7.4 | BMP1     | 0.318093312 | 1.15E-11    |
| RP11-363E7.4 | TM4SF4   | 0.451930866 | 1.75E-23    |
| RP11-363E7.4 | CORO2A   | 0.380882624 | 3.78E-17    |
| RP11-363E7.4 | CD164L2  | 0.276417814 | 3.86E-09    |
| RP11-363E7.4 | CTSS     | 0.323062859 | 5.30E-12    |
| RP11-363E7.4 | CLU      | 0.299118766 | 1.96E-10    |
| RP11-363E7.4 | TMSB4X   | 0.443732785 | 0           |
| RP11-363E7.4 | WNT10A   | 0.378671538 | 2.04E-16    |
| RP11-363E7.4 | NAPSA    | 0.519414099 | 0           |
| RP11-363E7.4 | PLEKHA4  | 0.234754069 | 7.06E-07    |
| RP11-363E7.4 | SFTPA1   | 0.247216054 | 1.55E-07    |
| RP11-363E7.4 | C1orf116 | 0.449342727 | 0           |
| RP11-363E7.4 | TM4SF1   | 0.510383045 | 0           |
| RP11-363E7.4 | SEL1L3   | 0.494392895 | 0           |
| RP11-363E7.4 | VASN     | 0.393384149 | 0           |
| RP11-363E7.4 | NPTXR    | 0.338339428 | 4.38E-13    |
| RP11-363E7.4 | PDE4C    | 0.584150835 | 0           |
| RP11-363E7.4 | CDC42EP1 | 0.473707651 | 0           |
| RP11-363E7.4 | ENDOD1   | 0.400862653 | 0           |
| RP11-363E7.4 | RYR1     | 0.523157323 | 0           |
| RP11-363E7.4 | IL1RAP   | 0.435595588 | 0           |
| RP11-363E7.4 | SLC35F2  | 0.449555569 | 3.17E-23    |
| RP11-363E7.4 | ISYNA1   | 0.351257954 | 4.58E-14    |
| RP11-363E7.4 | HLA-G    | 0.467533622 | 0           |
| RP11-363E7.4 | CDKN2B   | 0.529520278 | 0           |
| RP11-363E7.4 | ALDH1A3  | 0.661856591 | 0           |
| RP11-363E7.4 | CLIP3    | 0.323847361 | 4.68E-12    |
| RP11-363E7.4 | ULBP2    | 0.420656451 | 0           |
| RP11-363E7.4 | ETHE1    | 0.444092483 | 0           |
| RP11-363E7.4 | XPR1     | 0.532592187 | 0           |
| RP11-363E7.4 | SPTBN2   | 0.434074243 | 0           |
| RP11-363E7.4 | IVL      | 0.467408138 | 3.29E-25    |
| RP11-363E7.4 | MARCO    | 0.358550793 | 1.17E-14    |
| RP11-363E7.4 | PLXND1   | 0.300153893 | 1.69E-10    |
| RP11-363E7.4 | EMILIN2  | 0.407580344 | 0           |
| RP11-363E7.4 | PLAUR    | 0.473076618 | 0           |
| RP11-363E7.4 | CDC42EP5 | 0.482597151 | 0           |
| RP11-363E7.4 | TRPC5    | 0.101550436 | 0.033407352 |



|              |          |             |             |
|--------------|----------|-------------|-------------|
| RP11-363E7.4 | TMEM100  | 0.290041615 | 7.08E-10    |
| RP11-363E7.4 | QSOX1    | 0.465730873 | 0           |
| RP11-363E7.4 | ARHGAP23 | 0.425240485 | 0           |
| RP11-363E7.4 | MDFI     | 0.558642704 | 0           |
| RP11-363E7.4 | FSTL3    | 0.479238732 | 0           |
| RP11-363E7.4 | INF2     | 0.248937782 | 1.39E-07    |
| RP11-363E7.4 | TGFBR1   | 0.290611091 | 6.54E-10    |
| RP11-363E7.4 | TGFBI    | 0.261313497 | 3.10E-08    |
| RP11-363E7.4 | ERBB3    | 0.472270132 | 0           |
| RP11-363E7.4 | CCL18    | 0.360968691 | 7.32E-15    |
| RP11-363E7.4 | CCL17    | 0.339029974 | 2.87E-13    |
| RP11-363E7.4 | C16orf45 | 0.33448472  | 8.35E-13    |
| RP11-363E7.4 | PRDM1    | 0.284452665 | 1.53E-09    |
| RP11-363E7.4 | TRIM47   | 0.525232684 | 0           |
| RP11-363E7.4 | CNFN     | 0.489115419 | 0           |
| RP11-363E7.4 | ARMCX3   | 0.1004926   | 0.035338269 |
| RP11-363E7.4 | RAMP1    | 0.197056029 | 3.33E-05    |
| RP11-363E7.4 | GABRD    | 0.231114811 | 1.05E-06    |
| RP11-363E7.4 | COL13A1  | 0.271200396 | 8.86E-09    |
| RP11-363E7.4 | S100A5   | 0.38605585  | 0           |
| RP11-363E7.4 | MISP     | 0.567206121 | 0           |
| RP11-363E7.4 | HES6     | 0.327085644 | 2.79E-12    |
| RP11-363E7.4 | PSD3     | 0.284969519 | 1.42E-09    |
| RP11-363E7.4 | DOK7     | 0.492651844 | 0           |
| RP11-363E7.4 | ZMAT3    | 0.67098764  | 0           |
| RP11-363E7.4 | MFAP2    | 0.294904359 | 3.58E-10    |
| RP11-363E7.4 | TMEM79   | 0.33680787  | 5.67E-13    |
| RP11-363E7.4 | SLC1A5   | 0.258368533 | 4.46E-08    |
| RP11-363E7.4 | BBC3     | 0.654381916 | 0           |
| RP11-363E7.4 | HLA-DQB2 | 0.173876863 | 0.000256735 |
| RP11-363E7.4 | C1QL1    | 0.267346114 | 1.45E-08    |
| RP11-363E7.4 | TMEM215  | 0.211530401 | 7.82E-06    |
| RP11-363E7.4 | PNP      | 0.359637408 | 9.50E-15    |
| RP11-363E7.4 | ARNTL    | 0.347497142 | 9.00E-14    |
| RP11-363E7.4 | CLDN2    | 0.078575575 | 0.100136932 |
| RP11-363E7.4 | MVP      | 0.445610141 | 0           |
| RP11-363E7.4 | LGALS1   | 0.407239084 | 0           |
| RP11-363E7.4 | BIRC7    | 0.375748812 | 3.61E-16    |
| RP11-363E7.4 | COL8A1   | 0.319575935 | 9.16E-12    |
| RP11-363E7.4 | PERP     | 0.656247075 | 0           |
| RP11-363E7.4 | GJA4     | 0.407507298 | 0           |
| RP11-363E7.4 | IGFL2    | 0.450645208 | 2.41E-23    |
| RP11-363E7.4 | DAPK2    | 0.427582783 | 0           |
| RP11-363E7.4 | MAMLD1   | 0.415249619 | 0           |
| RP11-363E7.4 | ETV5     | 0.235177311 | 6.74E-07    |
| RP11-363E7.4 | RUNX1    | 0.561742412 | 0           |
| RP11-363E7.4 | LONRF2   | 0.156891015 | 0.000985129 |
| RP11-363E7.4 | SPOCK1   | 0.255454205 | 6.37E-08    |
| RP11-363E7.4 | XKRX     | 0.410114122 | 0           |
| RP11-363E7.4 | TGFBI    | 0.303334875 | 1.06E-10    |
| RP11-363E7.4 | ERP27    | 0.454561482 | 0           |

|              |           |             |             |
|--------------|-----------|-------------|-------------|
| RP11-363E7.4 | TNFRSF10C | 0.599983689 | 0           |
| RP11-363E7.4 | PALM      | 0.414843823 | 0           |
| RP11-363E7.4 | TSC22D1   | 0.182319576 | 0.000125464 |
| RP11-363E7.4 | TGM2      | 0.499109688 | 0           |
| RP11-363E7.4 | UBE2QL1   | 0.093237773 | 0.050937137 |
| RP11-363E7.4 | ECE1      | 0.423931044 | 0           |
| RP11-363E7.4 | COL8A2    | 0.488926775 | 0           |
| RP11-363E7.4 | HIST3H2A  | 0.384720453 | 0           |
| RP11-363E7.4 | TNFRSF21  | 0.534442594 | 0           |
| RP11-363E7.4 | SOX4      | 0.578302465 | 0           |
| RP11-363E7.4 | ELF3      | 0.551475815 | 0           |
| RP11-363E7.4 | TPD52L1   | 0.315602652 | 1.69E-11    |
| RP11-363E7.4 | INHBB     | 0.347859678 | 8.44E-14    |
| RP11-363E7.4 | HPN       | 0.341153902 | 2.72E-13    |
| RP11-363E7.4 | MMP7      | 0.424360944 | 1.28E-20    |
| RP11-363E7.4 | RAB27A    | 0.347586925 | 8.86E-14    |
| RP11-363E7.4 | IGF2BP2   | 0.38442529  | 0           |
| RP11-363E7.4 | ITGB4     | 0.57866571  | 0           |
| RP11-363E7.4 | PPP1R1B   | 0.383832836 | 0           |
| RP11-363E7.4 | NPDC1     | 0.303156869 | 1.09E-10    |
| RP11-363E7.4 | CCL13     | 0.385193333 | 5.62E-17    |
| RP11-363E7.4 | SPINT1    | 0.497139145 | 0           |
| RP11-363E7.4 | HEY2      | 0.229153346 | 1.31E-06    |
| RP11-363E7.4 | CST2      | 0.6129832   | 1.20E-46    |
| RP11-363E7.4 | ADM       | 0.157518644 | 0.00093949  |
| RP11-363E7.4 | VSTM2L    | 0.534945407 | 0           |
| RP11-363E7.4 | FAM84A    | 0.610089159 | 0           |
| RP11-363E7.4 | P4HA2     | 0.31427846  | 2.07E-11    |
| RP11-363E7.4 | LPL       | 0.470886227 | 0           |
| RP11-363E7.4 | TMEM173   | 0.467334767 | 0           |
| RP11-363E7.4 | DHRS3     | 0.414692341 | 0           |
| RP11-363E7.4 | SCN1B     | 0.3942729   | 0           |
| RP11-363E7.4 | GLT1D1    | 0.256803076 | 5.41E-08    |
| RP11-363E7.4 | PHYHIP    | 0.31602249  | 1.59E-11    |
| RP11-363E7.4 | BHLHE40   | 0.378647838 | 1.00E-16    |
| RP11-363E7.4 | BID       | 0.51034248  | 0           |
| RP11-363E7.4 | POSTN     | 0.318359966 | 1.11E-11    |
| RP11-363E7.4 | ITGA3     | 0.534355932 | 0           |
| RP11-363E7.4 | RSPO4     | 0.387446137 | 0           |
| RP11-363E7.4 | ADAMTS9   | 0.107901463 | 0.023803755 |
| RP11-363E7.4 | ABTB2     | 0.409863921 | 0           |
| RP11-363E7.4 | KCNQ3     | 0.544261695 | 0           |
| RP11-363E7.4 | ANXA1     | 0.383859218 | 0           |
| RP11-363E7.4 | S100A11   | 0.547890315 | 0           |
| RP11-363E7.4 | CEACAM6   | 0.630569578 | 4.81E-50    |
| RP11-363E7.4 | IER5L     | 0.337129557 | 5.37E-13    |
| RP11-363E7.4 | KRT80     | 0.568015301 | 0           |
| RP11-363E7.4 | CDH6      | 0.644455161 | 0           |
| RP11-363E7.4 | UNC5B     | 0.29882417  | 2.05E-10    |
| RP11-363E7.4 | PLEKHN1   | 0.537801014 | 0           |
| RP11-363E7.4 | SYTL1     | 0.588332478 | 0           |

|              |            |             |             |
|--------------|------------|-------------|-------------|
| RP11-363E7.4 | TMEM163    | 0.591902518 | 0           |
| RP11-363E7.4 | C4orf48    | 0.274759941 | 5.58E-09    |
| RP11-363E7.4 | B3GNT7     | 0.36027142  | 8.40E-15    |
| RP11-363E7.4 | BAIAP3     | 0.347292045 | 9.33E-14    |
| RP11-363E7.4 | PHLDA2     | 0.425697342 | 0           |
| RP11-363E7.4 | GAP43      | 0.402690937 | 1.52E-18    |
| RP11-363E7.4 | S100A1     | 0.408647101 | 0           |
| RP11-363E7.4 | PTPRE      | 0.482648496 | 0           |
| RP11-363E7.4 | CCND1      | 0.615337416 | 0           |
| RP11-363E7.4 | ST6GALNAC5 | 0.610870405 | 2.97E-46    |
| RP11-363E7.4 | KRT17      | 0.431191829 | 0           |
| RP11-363E7.4 | HPCAL4     | 0.179131928 | 0.000165028 |
| RP11-363E7.4 | GABBR2     | 0.164125844 | 0.000564272 |
| RP11-363E7.4 | DIRAS3     | 0.230219819 | 1.16E-06    |
| RP11-363E7.4 | SERINC2    | 0.505251094 | 0           |
| RP11-363E7.4 | PTCHD4     | 0.713807561 | 0           |
| RP11-363E7.4 | EPS8       | 0.248058675 | 1.54E-07    |
| RP11-363E7.4 | LY6E       | 0.365515564 | 2.90E-15    |
| RP11-363E7.4 | UPP1       | 0.565810727 | 0           |
| RP11-363E7.4 | AHNAK2     | 0.549105008 | 0           |
| RP11-363E7.4 | PLXNC1     | 0.13506072  | 0.004614225 |
| RP11-363E7.4 | TNC        | 0.337246573 | 5.27E-13    |
| RP11-363E7.4 | DUSP4      | 0.328852226 | 2.10E-12    |
| RP11-363E7.4 | NRCAM      | 0.401871825 | 0           |
| RP11-363E7.4 | NRP2       | 0.225394094 | 1.96E-06    |
| RP11-363E7.4 | CTSC       | 0.454513967 | 0           |
| RP11-363E7.4 | AMIGO2     | 0.434434793 | 0           |
| RP11-363E7.4 | NAB2       | 0.272495369 | 7.50E-09    |
| RP11-363E7.4 | TBC1D2     | 0.564681845 | 0           |
| RP11-363E7.4 | PHLDA3     | 0.622523169 | 0           |
| RP11-363E7.4 | PTP4A3     | 0.425591248 | 0           |
| RP11-363E7.4 | CRABP2     | 0.223373341 | 2.43E-06    |
| RP11-363E7.4 | GOS2       | 0.129838419 | 0.006478236 |
| RP11-363E7.4 | S100A6     | 0.54618912  | 0           |
| RP11-363E7.4 | FOXQ1      | 0.531788254 | 0           |
| RP11-363E7.4 | LRG1       | 0.419849823 | 0           |
| RP11-363E7.4 | LAMP5      | 0.31366005  | 2.28E-11    |
| RP11-363E7.4 | ALDH3B1    | 0.630898652 | 0           |
| RP11-363E7.4 | CDH2       | 0.130789721 | 0.006095158 |
| RP11-363E7.4 | SCG5       | 0.133005642 | 0.005280588 |
| RP11-363E7.4 | ZCCHC16    | 0.083449974 | 0.080718296 |
| RP11-363E7.4 | GRB7       | 0.497818403 | 0           |
| RP11-363E7.4 | TIAM1      | 0.475269703 | 0           |
| RP11-363E7.4 | FXYD5      | 0.324028345 | 4.55E-12    |
| RP11-363E7.4 | CLDN9      | 0.448615811 | 0           |
| RP11-363E7.4 | FAM43A     | 0.224105362 | 2.24E-06    |
| RP11-363E7.4 | CHST2      | 0.505522996 | 0           |
| RP11-363E7.4 | HMGA2      | 0.336430867 | 6.04E-13    |
| RP11-363E7.4 | GALNT7     | 0.283410587 | 1.76E-09    |
| RP11-363E7.4 | CBLN1      | 0.506468908 | 0           |
| RP11-363E7.4 | STRA6      | 0.445629289 | 0           |

|              |         |             |             |
|--------------|---------|-------------|-------------|
| RP11-363E7.4 | MUC21   | 0.463719856 | 8.64E-25    |
| RP11-363E7.4 | PRR36   | 0.33131466  | 1.41E-12    |
| RP11-363E7.4 | NFE2L3  | 0.591494027 | 0           |
| RP11-363E7.4 | NR1D1   | 0.320854172 | 7.50E-12    |
| RP11-363E7.4 | MUC1    | 0.485913445 | 0           |
| RP11-363E7.4 | NAT8L   | 0.138190499 | 0.003744461 |
| RP11-363E7.4 | APOC1   | 0.218769733 | 3.93E-06    |
| RP11-363E7.4 | EVA1A   | 0.573090943 | 0           |
| RP11-363E7.4 | ENTPD1  | 0.32918994  | 1.99E-12    |
| RP11-363E7.4 | COL1A1  | 0.303053753 | 1.11E-10    |
| RP11-363E7.4 | FNDC4   | 0.574561936 | 0           |
| RP11-363E7.4 | FRMD3   | 0.165505352 | 0.000506072 |
| RP11-363E7.4 | SHROOM4 | 0.348047045 | 8.16E-14    |
| RP11-363E7.4 | NELL2   | 0.280423214 | 2.63E-09    |
| RP11-363E7.4 | EPHB3   | 0.490654635 | 0           |
| RP11-363E7.4 | TMC6    | 0.406422953 | 0           |
| RP11-363E7.4 | NOD1    | 0.328799178 | 2.12E-12    |
| RP11-363E7.4 | GGCT    | 0.339321933 | 3.71E-13    |
| RP11-363E7.4 | ICAM1   | 0.443212384 | 0           |
| RP11-363E7.4 | PRSS23  | 0.510262626 | 0           |
| RP11-363E7.4 | CFI     | 0.501982174 | 0           |
| RP11-363E7.4 | CD55    | 0.642323065 | 0           |
| RP11-363E7.4 | RASD2   | 0.431389692 | 0           |
| RP11-363E7.4 | KLK11   | 0.320324411 | 6.23E-12    |
| RP11-363E7.4 | ICAM5   | 0.437125869 | 0           |
| RP11-363E7.4 | ADORA1  | 0.300822514 | 1.53E-10    |
| RP11-363E7.4 | ITGA2   | 0.617720138 | 0           |
| RP11-363E7.4 | ABCC3   | 0.327428039 | 2.64E-12    |
| RP11-363E7.4 | MFGE8   | 0.362073177 | 5.87E-15    |
| RP11-363E7.4 | STK32A  | 0.388028946 | 0           |
| RP11-363E7.4 | CYSLTR2 | 0.437973913 | 0           |
| RP11-363E7.4 | LAD1    | 0.366271272 | 2.47E-15    |
| RP11-363E7.4 | MGAT3   | 0.596979011 | 0           |
| RP11-363E7.4 | IGFBP6  | 0.338820397 | 4.04E-13    |
| RP11-363E7.4 | CYP2S1  | 0.634489826 | 0           |
| RP11-363E7.4 | KCNJ2   | 0.400849746 | 0           |
| RP11-363E7.4 | FAM20A  | 0.457516517 | 0           |
| RP11-363E7.4 | TGFA    | 0.361442143 | 6.66E-15    |
| RP11-363E7.4 | MXRA8   | 0.429214903 | 0           |
| RP11-363E7.4 | C8orf4  | 0.506115166 | 0           |
| RP11-363E7.4 | CLDN10  | 0.371418683 | 8.30E-16    |
| RP11-363E7.4 | PDE5A   | 0.286965877 | 1.08E-09    |
| RP11-363E7.4 | APOE    | 0.146374785 | 0.002126329 |
| RP11-363E7.4 | SPOCK2  | 0.504523186 | 0           |
| RP11-363E7.4 | TENM1   | 0.187092112 | 8.25E-05    |
| RP11-363E7.4 | SLIT1   | 0.238685085 | 4.55E-07    |
| RP11-363E7.4 | CXCL14  | 0.333769293 | 9.40E-13    |
| RP11-363E7.4 | ECM1    | 0.293737465 | 4.22E-10    |
| RP11-363E7.4 | DUSP5   | 0.509030203 | 0           |
| RP11-363E7.4 | SEZ6L2  | 0.455654763 | 0           |
| RP11-363E7.4 | THRSP   | 0.253621527 | 7.95E-08    |

|              |           |             |             |
|--------------|-----------|-------------|-------------|
| RP11-363E7.4 | C19orf33  | 0.60816145  | 0           |
| RP11-363E7.4 | MPZL2     | 0.502608669 | 0           |
| RP11-363E7.4 | CTSH      | 0.289161941 | 8.00E-10    |
| RP11-363E7.4 | CYP1B1    | 0.176385678 | 0.000208222 |
| RP11-363E7.4 | ALOX5     | 0.525786132 | 0           |
| RP11-363E7.4 | SYTL5     | 0.568139784 | 6.90E-39    |
| RP11-363E7.4 | TNFRSF12A | 0.425232258 | 0           |
| RP11-363E7.4 | DUSP6     | 0.548892536 | 0           |
| RP11-363E7.4 | ALOX15B   | 0.479063847 | 0           |
| RP11-363E7.4 | SDC4      | 0.37759413  | 1.44E-16    |
| RP11-363E7.4 | MDK       | 0.43433806  | 0           |
| RP11-363E7.4 | KRT19     | 0.626030234 | 0           |
| RP11-363E7.4 | MET       | 0.494485089 | 0           |
| RP11-363E7.4 | TESC      | 0.21014717  | 9.42E-06    |
| RP11-363E7.4 | CXCL17    | 0.35632758  | 1.37E-14    |
| RP11-363E7.4 | NPC2      | 0.268716686 | 1.22E-08    |
| RP11-363E7.4 | COMP      | 0.343178627 | 1.92E-13    |
| RP11-363E7.4 | TUSC3     | 0.420517592 | 0           |
| RP11-363E7.4 | TMPRSS4   | 0.647554586 | 0           |
| RP11-363E7.4 | LGALS3    | 0.555400591 | 0           |
| RP11-363E7.4 | CRLF1     | 0.546137208 | 0           |
| RP11-363E7.4 | CTXN1     | 0.470061018 | 0           |
| RP11-363E7.4 | PCSK1N    | 0.447297152 | 0           |
| RP11-363E7.4 | NMU       | 0.513250781 | 7.16E-31    |
| RP11-363E7.4 | GALE      | 0.414641138 | 0           |
| RP11-363E7.4 | PCSK2     | 0.366122627 | 2.55E-15    |
| RP11-363E7.4 | GJB3      | 0.376185546 | 2.23E-16    |
| RP11-363E7.4 | SLPI      | 0.571122386 | 0           |
| RP11-363E7.4 | AGR2      | 0.563956206 | 0           |
| RP11-363E7.4 | MRC2      | 0.45187381  | 0           |
| RP11-363E7.4 | GOLT1A    | 0.319014828 | 9.99E-12    |
| RP11-363E7.4 | SLC27A6   | 0.523216629 | 3.21E-32    |
| RP11-363E7.4 | KCNN4     | 0.487614214 | 0           |
| RP11-363E7.4 | ETV4      | 0.496212044 | 1.15E-28    |
| RP11-363E7.4 | SYT12     | 0.292921051 | 4.73E-10    |
| RP11-363E7.4 | PVRL4     | 0.432327944 | 0           |
| RP11-363E7.4 | PLCD3     | 0.406007086 | 0           |
| RP11-363E7.4 | PLAU      | 0.418007642 | 0           |
| RP11-363E7.4 | LRRK2     | 0.175548697 | 0.000223361 |
| RP11-363E7.4 | SFN       | 0.517710493 | 0           |
| RP11-363E7.4 | LPAR5     | 0.334757615 | 7.98E-13    |
| RP11-363E7.4 | NGEF      | 0.547751172 | 0           |
| RP11-363E7.4 | DTX4      | 0.41223246  | 0           |
| RP11-363E7.4 | CST6      | 0.448777789 | 0           |
| RP11-363E7.4 | QPCT      | 0.296963267 | 2.67E-10    |
| RP11-363E7.4 | TIMP1     | 0.345951826 | 1.18E-13    |
| RP11-363E7.4 | CAMK2N1   | 0.265827322 | 1.76E-08    |
| RP11-363E7.4 | KLHDC8A   | 0.3623977   | 5.50E-15    |
| RP11-363E7.4 | PDLIM4    | 0.35567306  | 2.03E-14    |
| RP11-363E7.4 | SCEL      | 0.485132632 | 0           |
| RP11-363E7.4 | LCN2      | 0.515365358 | 0           |

|              |          |              |             |
|--------------|----------|--------------|-------------|
| RP11-363E7.4 | PROS1    | 0.458136771  | 0           |
| RP11-363E7.4 | GABRB2   | 0.432391062  | 0           |
| RP11-363E7.4 | TMPRSS6  | 0.513443181  | 0           |
| RP11-363E7.4 | KLK7     | 0.326062937  | 2.48E-12    |
| RP11-363E7.4 | PDZK1IP1 | 0.402026285  | 0           |
| RP11-363E7.4 | CDH3     | 0.463705296  | 0           |
| RP11-363E7.4 | LRP4     | 0.283822482  | 1.66E-09    |
| RP11-363E7.4 | IGSF1    | 0.533840496  | 0           |
| RP11-363E7.4 | B3GNT3   | 0.647321831  | 0           |
| RP11-363E7.4 | CLDN1    | 0.554436382  | 0           |
| RP11-363E7.4 | GDF15    | 0.532997132  | 0           |
| RP11-363E7.4 | ARHGAP36 | 0.529297293  | 4.59E-33    |
| RP11-363E7.4 | LAMB3    | 0.444403674  | 0           |
| RP11-363E7.4 | KLK10    | 0.394111773  | 0           |
| RP11-363E7.4 | DPP4     | 0.526388373  | 0           |
| RP11-363E7.4 | METTL7B  | 0.276432484  | 4.48E-09    |
| RP11-363E7.4 | LIPH     | 0.589358244  | 0           |
| RP11-363E7.4 | CLDN16   | 0.441184397  | 0           |
| RP11-363E7.4 | CHI3L1   | 0.247334029  | 1.68E-07    |
| RP11-363E7.4 | SLC22A31 | 0.450860473  | 2.29E-23    |
| RP11-363E7.4 | TACSTD2  | 0.409744778  | 0           |
| RP11-363E7.4 | SFTPB    | 0.453492172  | 0           |
| RP11-363E7.4 | RXRG     | 0.217808928  | 4.34E-06    |
| RP11-363E7.4 | DCSTAMP  | 0.317608694  | 9.57E-12    |
| RP11-363E7.4 | CITED1   | 0.126211502  | 0.008144648 |
| RP11-363E7.4 | SERPINA1 | 0.436494978  | 0           |
| RP11-363E7.4 | PRR15    | 0.302278472  | 1.24E-10    |
| RP11-363E7.4 | SLC34A2  | 0.414627096  | 0           |
| RP11-363E7.4 | FN1      | 0.472019222  | 0           |
| RP11-363E7.4 | ZCCHC12  | 0.341395592  | 2.61E-13    |
| LINC00086    | TFF3     | -0.248496952 | 1.46E-07    |
| LINC00086    | CCL21    | -0.153561585 | 0.001248936 |
| LINC00086    | TPO      | -0.231831089 | 9.75E-07    |
| LINC00086    | MT1G     | -0.236192155 | 6.02E-07    |
| LINC00086    | DIO1     | -0.278133962 | 3.57E-09    |
| LINC00086    | DPT      | -0.18572118  | 9.07E-05    |
| LINC00086    | CDH16    | -0.351612263 | 4.30E-14    |
| LINC00086    | CRABP1   | -0.232050817 | 8.86E-07    |
| LINC00086    | SLC26A7  | -0.24051762  | 3.69E-07    |
| LINC00086    | MT1H     | -0.238600584 | 4.23E-07    |
| LINC00086    | SLC26A4  | -0.124984185 | 0.008789686 |
| LINC00086    | SLC5A8   | -0.427473636 | 6.28E-21    |
| LINC00086    | PKHD1L1  | -0.300978783 | 1.21E-10    |
| LINC00086    | TFCP2L1  | -0.396020617 | 0           |
| LINC00086    | WSCD2    | -0.197756356 | 3.01E-05    |
| LINC00086    | IPCEF1   | -0.24301906  | 2.77E-07    |
| LINC00086    | SLC5A5   | -0.231639602 | 9.27E-07    |
| LINC00086    | MT1F     | -0.251481914 | 1.03E-07    |
| LINC00086    | FOSB     | -0.089006062 | 0.062442585 |
| LINC00086    | SEMA3D   | -0.263069237 | 2.21E-08    |
| LINC00086    | BMP8A    | -0.114646811 | 0.016293526 |

|           |           |              |             |
|-----------|-----------|--------------|-------------|
| LINC00086 | MATN2     | -0.302917873 | 1.13E-10    |
| LINC00086 | PLA2R1    | -0.325982009 | 3.33E-12    |
| LINC00086 | COL23A1   | -0.267356893 | 1.45E-08    |
| LINC00086 | HGD       | -0.258986801 | 4.14E-08    |
| LINC00086 | TCEAL2    | -0.13183889  | 0.005696373 |
| LINC00086 | CHRD1     | -0.137389478 | 0.003925213 |
| LINC00086 | TNFRSF11B | -0.338288224 | 4.42E-13    |
| LINC00086 | FAM167A   | -0.167612342 | 0.000427861 |
| LINC00086 | KIT       | -0.300140844 | 1.69E-10    |
| LINC00086 | SLC4A4    | -0.307790263 | 5.51E-11    |
| LINC00086 | SMOC2     | -0.146372232 | 0.002126714 |
| LINC00086 | FHL1      | -0.210233833 | 9.34E-06    |
| LINC00086 | OTOS      | -0.30781168  | 5.49E-11    |
| LINC00086 | IGFBPL1   | -0.304342245 | 7.33E-11    |
| LINC00086 | HBB       | -0.134135801 | 0.004904119 |
| LINC00086 | BEX1      | 0.058871771  | 0.218210764 |
| LINC00086 | FABP4     | -0.189300259 | 6.58E-05    |
| LINC00086 | LMOD1     | -0.132341277 | 0.00551386  |
| LINC00086 | SOD3      | -0.236459518 | 5.84E-07    |
| LINC00086 | TMEM171   | -0.449390384 | 0           |
| LINC00086 | PI16      | -0.133088901 | 0.00525199  |
| LINC00086 | ZMAT4     | -0.259032788 | 3.67E-08    |
| LINC00086 | MFAP4     | -0.023585387 | 0.622002993 |
| LINC00086 | CWH43     | -0.420661855 | 2.97E-20    |
| LINC00086 | SPX       | -0.165499253 | 0.000506317 |
| LINC00086 | APOD      | -0.135734872 | 0.004412779 |
| LINC00086 | DPP6      | -0.250031488 | 1.22E-07    |
| LINC00086 | MMRN1     | -0.211259599 | 8.43E-06    |
| LINC00086 | WDR72     | -0.376245685 | 2.19E-16    |
| LINC00086 | MPPED2    | -0.181406003 | 0.000135781 |
| LINC00086 | PAPSS2    | -0.266198651 | 1.68E-08    |
| LINC00086 | DCN       | -0.173841403 | 0.000257491 |
| LINC00086 | SORBS2    | -0.243675766 | 2.57E-07    |
| LINC00086 | EGR2      | -0.065181821 | 0.172732102 |
| LINC00086 | EDN3      | 0.13571146   | 0.004391849 |
| LINC00086 | DIO2      | -0.20332679  | 1.84E-05    |
| LINC00086 | ITPR1     | -0.125557491 | 0.008482915 |
| LINC00086 | CFD       | -0.172368992 | 0.000290782 |
| LINC00086 | CPXM1     | -0.1101371   | 0.021036479 |
| LINC00086 | ELMO1     | -0.097790745 | 0.040592349 |
| LINC00086 | GPC3      | -0.192455193 | 4.93E-05    |
| LINC00086 | MYOC      | 0.082635761  | 0.083731464 |
| LINC00086 | DEPTOR    | -0.337042185 | 5.45E-13    |
| LINC00086 | DGKI      | -0.329042429 | 2.04E-12    |
| LINC00086 | CARTPT    | -0.138964037 | 0.003528651 |
| LINC00086 | IYD       | -0.343310394 | 1.87E-13    |
| LINC00086 | LYVE1     | -0.129933308 | 0.006439078 |
| LINC00086 | CLCNKB    | -0.152499738 | 0.0013663   |
| LINC00086 | NCAM1     | -0.413085043 | 0           |
| LINC00086 | HBA2      | -0.092499511 | 0.052806238 |
| LINC00086 | GLT8D2    | -0.180524769 | 0.000146483 |

|           |            |              |             |
|-----------|------------|--------------|-------------|
| LINC00086 | OGDHL      | -0.421581796 | 0           |
| LINC00086 | LIFR       | -0.204366598 | 1.66E-05    |
| LINC00086 | CSGALNACT1 | -0.413231419 | 0           |
| LINC00086 | RAP1GAP    | -0.445855519 | 0           |
| LINC00086 | COL9A3     | -0.019094115 | 0.689807628 |
| LINC00086 | FBLN1      | -0.20215096  | 2.06E-05    |
| LINC00086 | EFEMP1     | -0.24091136  | 3.53E-07    |
| LINC00086 | AOX1       | -0.263610559 | 2.06E-08    |
| LINC00086 | GRIN2C     | -0.260461056 | 3.45E-08    |
| LINC00086 | C11orf74   | -0.234627266 | 7.16E-07    |
| LINC00086 | PPARGC1A   | -0.460043771 | 0           |
| LINC00086 | ANGPTL1    | -0.094149928 | 0.048704417 |
| LINC00086 | SCARA5     | -0.193985978 | 4.28E-05    |
| LINC00086 | LTF        | -0.171711435 | 0.000306913 |
| LINC00086 | CA4        | 0.009772865  | 0.838208666 |
| LINC00086 | TG         | -0.078262892 | 0.101485567 |
| LINC00086 | FCGBP      | -0.149544845 | 0.001694695 |
| LINC00086 | PBX4       | -0.099798875 | 0.036628798 |
| LINC00086 | CYR61      | -0.119960881 | 0.011929421 |
| LINC00086 | FOS        | -0.09302757  | 0.051463605 |
| LINC00086 | KHDRBS2    | -0.01806154  | 0.705779882 |
| LINC00086 | MUM1L1     | -0.234271681 | 7.45E-07    |
| LINC00086 | RGS16      | -0.201457093 | 2.20E-05    |
| LINC00086 | MT1M       | -0.260342764 | 3.50E-08    |
| LINC00086 | LRP2       | -0.324713276 | 4.08E-12    |
| LINC00086 | MAFB       | -0.265726617 | 1.78E-08    |
| LINC00086 | KCNK2      | -0.295585461 | 3.25E-10    |
| LINC00086 | TBC1D4     | -0.137452946 | 0.003934847 |
| LINC00086 | MIOX       | -0.111078831 | 0.019915683 |
| LINC00086 | TPPP       | -0.31617227  | 1.55E-11    |
| LINC00086 | FMOD       | -0.352145287 | 3.90E-14    |
| LINC00086 | CITED2     | -0.323188669 | 5.20E-12    |
| LINC00086 | RGS8       | -0.203848649 | 1.68E-05    |
| LINC00086 | ABI3BP     | -0.332723386 | 1.12E-12    |
| LINC00086 | ADH1B      | -0.161498631 | 0.00068267  |
| LINC00086 | OGN        | -0.208001662 | 1.11E-05    |
| LINC00086 | NR4A1      | -0.026411776 | 0.580873305 |
| LINC00086 | FOXJ1      | 0.017770867  | 0.71040758  |
| LINC00086 | ALDH1A1    | -0.14468905  | 0.002394786 |
| LINC00086 | OCA2       | -0.191884154 | 5.20E-05    |
| LINC00086 | TMEM139    | -0.244896558 | 2.23E-07    |
| LINC00086 | ARHGAP24   | -0.236438385 | 5.85E-07    |
| LINC00086 | SLC25A15   | -0.355453638 | 2.11E-14    |
| LINC00086 | DES        | -0.184446147 | 0.000101509 |
| LINC00086 | GDF10      | -0.156535173 | 0.000999266 |
| LINC00086 | KIAA1324   | -0.157619065 | 0.000932372 |
| LINC00086 | JUN        | -0.117887222 | 0.013491312 |
| LINC00086 | C7         | -0.11406074  | 0.016851515 |
| LINC00086 | LGI3       | -0.165164091 | 0.000519926 |
| LINC00086 | CDON       | -0.181927396 | 0.000129799 |
| LINC00086 | BCL2       | -0.344788195 | 1.45E-13    |



|           |          |              |             |
|-----------|----------|--------------|-------------|
| LINC00086 | HLF      | -0.102079191 | 0.032531522 |
| LINC00086 | EGR1     | -0.071590874 | 0.134187151 |
| LINC00086 | IP6K3    | -0.260294823 | 3.52E-08    |
| LINC00086 | SCUBE3   | -0.103745777 | 0.029790581 |
| LINC00086 | PKNOX2   | -0.065148915 | 0.172949349 |
| LINC00086 | SMAD9    | -0.390826258 | 0           |
| LINC00086 | IQGAP2   | -0.326508225 | 3.06E-12    |
| LINC00086 | GNA14    | -0.145891404 | 0.002200347 |
| LINC00086 | LAYN     | -0.06025369  | 0.207582058 |
| LINC00086 | AVPR1A   | -0.137042894 | 0.004044448 |
| LINC00086 | PDLIM3   | -0.299674767 | 1.81E-10    |
| LINC00086 | GPM6A    | -0.341179291 | 2.70E-13    |
| LINC00086 | SDPR     | 0.032179157  | 0.501129351 |
| LINC00086 | CRYAB    | -0.487726691 | 0           |
| LINC00086 | FOXA2    | -0.081251987 | 0.089060076 |
| LINC00086 | C8orf88  | -0.253846481 | 7.74E-08    |
| LINC00086 | ISM1     | -0.070620424 | 0.139554949 |
| LINC00086 | BMP2     | -0.297978254 | 2.31E-10    |
| LINC00086 | ID4      | -0.251806296 | 9.89E-08    |
| LINC00086 | NUPR1    | -0.521671153 | 0           |
| LINC00086 | SERTM1   | -0.428810205 | 4.61E-21    |
| LINC00086 | IRS1     | -0.118093737 | 0.013328067 |
| LINC00086 | FIBIN    | -0.479400284 | 0           |
| LINC00086 | PODN     | -0.157339646 | 0.000952303 |
| LINC00086 | TDRD9    | -0.37976665  | 6.46E-17    |
| LINC00086 | EPHA3    | -0.137022895 | 0.004049863 |
| LINC00086 | AIF1L    | -0.252480731 | 9.12E-08    |
| LINC00086 | EBF4     | -0.089802336 | 0.060127263 |
| LINC00086 | ADM2     | -0.367048965 | 2.09E-15    |
| LINC00086 | GSTM3    | -0.17896371  | 0.000167411 |
| LINC00086 | HSD17B6  | -0.12581762  | 0.008346898 |
| LINC00086 | AGR3     | -0.223668557 | 2.21E-06    |
| LINC00086 | EPHB1    | -0.395549434 | 0           |
| LINC00086 | TMOD1    | -0.264338457 | 2.13E-08    |
| LINC00086 | WASF3    | -0.246284576 | 1.90E-07    |
| LINC00086 | SELV     | -0.18416102  | 0.000104095 |
| LINC00086 | ENPP1    | -0.421795686 | 0           |
| LINC00086 | SYNE1    | -0.17925356  | 0.000159561 |
| LINC00086 | PLCH1    | -0.264582843 | 2.06E-08    |
| LINC00086 | CCDC146  | -0.153745635 | 0.001246269 |
| LINC00086 | SLC16A2  | -0.055980279 | 0.241699135 |
| LINC00086 | IER2     | -0.028624719 | 0.549584629 |
| LINC00086 | KCNAB1   | 0.135174474  | 0.004579662 |
| LINC00086 | SYNDIG1  | -0.26709875  | 1.50E-08    |
| LINC00086 | C16orf89 | -0.017231368 | 0.718716143 |
| LINC00086 | CTGF     | -0.050516571 | 0.290800384 |
| LINC00086 | NR4A3    | -0.113798767 | 0.017106299 |
| LINC00086 | KIAA1456 | -0.333514838 | 9.81E-13    |
| LINC00086 | AQP4     | -0.116710116 | 0.014455858 |
| LINC00086 | RNF150   | -0.132315463 | 0.005523108 |
| LINC00086 | C1S      | -0.170450645 | 0.000340204 |

|           |          |              |             |
|-----------|----------|--------------|-------------|
| LINC00086 | PFKFB2   | -0.392695671 | 0           |
| LINC00086 | PROX1    | -0.230817805 | 1.09E-06    |
| LINC00086 | TCF7L1   | -0.055871915 | 0.242612641 |
| LINC00086 | HSPB6    | -0.013814511 | 0.772773527 |
| LINC00086 | FHDC1    | -0.151459788 | 0.001474536 |
| LINC00086 | PRR15L   | -0.32686069  | 2.90E-12    |
| LINC00086 | SLC1A1   | -0.42326753  | 0           |
| LINC00086 | BTBD11   | -0.051441065 | 0.282052899 |
| LINC00086 | TRIM58   | -0.296953338 | 2.67E-10    |
| LINC00086 | LRIG1    | -0.364173359 | 3.83E-15    |
| LINC00086 | ROR2     | -0.237711373 | 5.07E-07    |
| LINC00086 | GPR125   | -0.289209031 | 7.95E-10    |
| LINC00086 | FLRT1    | -0.075440475 | 0.114450189 |
| LINC00086 | PGF      | -0.085125824 | 0.074800472 |
| LINC00086 | DUSP1    | -0.1091736   | 0.02219282  |
| LINC00086 | PLA2G7   | -0.25747893  | 4.98E-08    |
| LINC00086 | PLSCR4   | -0.311133364 | 3.34E-11    |
| LINC00086 | FAM46B   | -0.411119606 | 0           |
| LINC00086 | GLDC     | -0.121706896 | 0.010740614 |
| LINC00086 | ZBTB16   | -0.244463813 | 2.35E-07    |
| LINC00086 | OMD      | -0.190531075 | 5.88E-05    |
| LINC00086 | HSD11B2  | -0.029549497 | 0.536759297 |
| LINC00086 | FGL2     | -0.15308978  | 0.001308188 |
| LINC00086 | CLCNKA   | -0.157540848 | 0.000925845 |
| LINC00086 | GATM     | -0.241773588 | 3.20E-07    |
| LINC00086 | TNS3     | -0.33720161  | 5.31E-13    |
| LINC00086 | TOB1     | -0.189600218 | 6.59E-05    |
| LINC00086 | MARC2    | -0.281283881 | 2.35E-09    |
| LINC00086 | LRRC2    | -0.404895792 | 0           |
| LINC00086 | SORD     | -0.36071849  | 7.69E-15    |
| LINC00086 | RIMS4    | -0.154376668 | 0.001189253 |
| LINC00086 | SLC29A4  | -0.105138617 | 0.027654129 |
| LINC00086 | SLC39A14 | -0.28945753  | 7.68E-10    |
| LINC00086 | FAXDC2   | -0.168063526 | 0.000412647 |
| LINC00086 | HSPB8    | -0.414719574 | 0           |
| LINC00086 | CCL19    | -0.084703047 | 0.076253046 |
| LINC00086 | KCNIP3   | -0.036596533 | 0.444209264 |
| LINC00086 | CGNL1    | -0.162192745 | 0.000656335 |
| LINC00086 | ATF3     | -0.100015035 | 0.03622245  |
| LINC00086 | SGCD     | -0.420075628 | 0           |
| LINC00086 | STARD13  | -0.200997682 | 2.30E-05    |
| LINC00086 | LDHD     | -0.232620129 | 8.94E-07    |
| LINC00086 | RCAN1    | -0.276115053 | 4.67E-09    |
| LINC00086 | ID3      | -0.327330029 | 2.69E-12    |
| LINC00086 | SYTL3    | -0.252628809 | 8.96E-08    |
| LINC00086 | MT1E     | -0.207771256 | 1.19E-05    |
| LINC00086 | CAMK1D   | -0.101804594 | 0.033003208 |
| LINC00086 | PRKCQ    | -0.247745499 | 1.60E-07    |
| LINC00086 | NUAK2    | -0.342476817 | 2.16E-13    |
| LINC00086 | LIPG     | -0.04443034  | 0.352892098 |
| LINC00086 | SLC25A25 | -0.362702224 | 5.18E-15    |

|           |          |              |             |
|-----------|----------|--------------|-------------|
| LINC00086 | PRKX     | -0.367096906 | 2.07E-15    |
| LINC00086 | SRPX     | -0.00357231  | 0.940481823 |
| LINC00086 | FAM189A1 | -0.049423432 | 0.301376064 |
| LINC00086 | PLEKHH1  | -0.123686092 | 0.009521093 |
| LINC00086 | WNT11    | -0.150067089 | 0.00163184  |
| LINC00086 | SNAI1    | -0.229509641 | 1.26E-06    |
| LINC00086 | FDCSP    | -0.029274329 | 0.540704724 |
| LINC00086 | MT1X     | -0.211414343 | 8.30E-06    |
| LINC00086 | ACACB    | -0.229914869 | 1.20E-06    |
| LINC00086 | ARC      | 0.069028302  | 0.148716364 |
| LINC00086 | KLK4     | -0.513898232 | 5.87E-31    |
| LINC00086 | ZFPM2    | -0.168888167 | 0.000386136 |
| LINC00086 | AKAP12   | -0.152967091 | 0.001320081 |
| LINC00086 | GJB6     | -0.30751032  | 4.55E-11    |
| LINC00086 | ERO1LB   | -0.176127392 | 0.000212788 |
| LINC00086 | DNALI1   | 0.009597126  | 0.841016418 |
| LINC00086 | HKDC1    | -0.41006916  | 0           |
| LINC00086 | ZFP36L2  | -0.362238559 | 5.68E-15    |
| LINC00086 | CAPSL    | 0.02163104   | 0.651282432 |
| LINC00086 | CYP7B1   | -0.260289149 | 3.52E-08    |
| LINC00086 | CPQ      | -0.079648216 | 0.095563705 |
| LINC00086 | RPS6KA6  | -0.14426709  | 0.002445711 |
| LINC00086 | TLE1     | -0.370245123 | 1.03E-15    |
| LINC00086 | TP53INP2 | -0.103448202 | 0.030264938 |
| LINC00086 | KATNAL2  | -0.211265981 | 8.42E-06    |
| LINC00086 | SGPP2    | -0.344078725 | 1.64E-13    |
| LINC00086 | CTH      | -0.390483296 | 0           |
| LINC00086 | KIF12    | -0.226696727 | 1.70E-06    |
| LINC00086 | TMEM220  | -0.187998735 | 7.61E-05    |
| LINC00086 | CENPJ    | -0.25269604  | 8.89E-08    |
| LINC00086 | FAM155B  | 0.297991586  | 2.30E-10    |
| LINC00086 | WFS1     | -0.273075908 | 6.95E-09    |
| LINC00086 | SELENBP1 | -0.008002876 | 0.867157354 |
| LINC00086 | SNTA1    | -0.418370887 | 0           |
| LINC00086 | FRAS1    | -0.475488984 | 0           |
| LINC00086 | FBLN7    | -0.318885614 | 1.02E-11    |
| LINC00086 | AGPAT9   | -0.205254924 | 1.52E-05    |
| LINC00086 | GPR83    | -0.029436736 | 0.538315049 |
| LINC00086 | PRTG     | -0.196991067 | 3.35E-05    |
| LINC00086 | EGR3     | 0.063855786  | 0.181648732 |
| LINC00086 | GRAMD2   | -0.351363339 | 4.50E-14    |
| LINC00086 | HYOU1    | -0.190182885 | 6.26E-05    |
| LINC00086 | FBLN5    | -0.074002814 | 0.121536175 |
| LINC00086 | ITM2A    | -0.030429454 | 0.524696551 |
| LINC00086 | SRF      | -0.071719094 | 0.133490004 |
| LINC00086 | FGFR2    | -0.155445837 | 0.001098107 |
| LINC00086 | MT1A     | -0.212900307 | 6.80E-06    |
| LINC00086 | MAMDC2   | -0.160457794 | 0.000750634 |
| LINC00086 | FHL2     | -0.240161042 | 3.84E-07    |
| LINC00086 | FTCDNL1  | -0.488175464 | 0           |
| LINC00086 | PKIA     | 0.005756602  | 0.904230297 |

|           |          |              |             |
|-----------|----------|--------------|-------------|
| LINC00086 | DNAJB4   | -0.151866009 | 0.001431352 |
| LINC00086 | SLC25A33 | -0.256265513 | 5.77E-08    |
| LINC00086 | EYA2     | -0.496221884 | 0           |
| LINC00086 | LPAR1    | -0.434830661 | 0           |
| LINC00086 | STX11    | -0.32109955  | 7.22E-12    |
| LINC00086 | ARHGEF28 | -0.398588579 | 0           |
| LINC00086 | OR2W3    | -0.208925953 | 1.06E-05    |
| LINC00086 | ALDH1B1  | -0.39267597  | 1.23E-17    |
| LINC00086 | CXCL12   | -0.079221428 | 0.097357939 |
| LINC00086 | OLFM2    | 0.031461461  | 0.510728031 |
| LINC00086 | TUB      | -0.264882687 | 1.99E-08    |
| LINC00086 | HTRA3    | -0.149555341 | 0.00169341  |
| LINC00086 | CKB      | -0.18591146  | 9.16E-05    |
| LINC00086 | RGS2     | -0.184158353 | 0.000106893 |
| LINC00086 | SHANK2   | -0.105332225 | 0.027367851 |
| LINC00086 | CNTFR    | 0.019401914  | 0.685187639 |
| LINC00086 | CYTH3    | -0.170116051 | 0.000349588 |
| LINC00086 | PLAC9    | 0.003864636  | 0.93562144  |
| LINC00086 | WVOX     | -0.136502637 | 0.004193068 |
| LINC00086 | NPR3     | -0.112173314 | 0.018763768 |
| LINC00086 | SDC2     | -0.087665701 | 0.066505772 |
| LINC00086 | KLF15    | -0.146566407 | 0.002097623 |
| LINC00086 | TMEM164  | -0.302225425 | 1.25E-10    |
| LINC00086 | LONRF3   | -0.143523858 | 0.002598059 |
| LINC00086 | GBP1     | -0.131262464 | 0.005912465 |
| LINC00086 | ARHGAP6  | -0.383190598 | 2.86E-18    |
| LINC00086 | TMEM119  | -0.082766505 | 0.083242548 |
| LINC00086 | SH3RF1   | -0.33831106  | 4.40E-13    |
| LINC00086 | CRELD2   | -0.126230224 | 0.008135145 |
| LINC00086 | PCP4     | -0.169646996 | 0.000363151 |
| LINC00086 | GCSH     | -0.197309491 | 3.25E-05    |
| LINC00086 | IMPA2    | -0.229176891 | 1.30E-06    |
| LINC00086 | C1R      | -0.138817702 | 0.003589172 |
| LINC00086 | SUCNR1   | -0.043161748 | 0.366817809 |
| LINC00086 | SFRP1    | -0.090327133 | 0.058640477 |
| LINC00086 | UGT8     | -0.31259301  | 2.68E-11    |
| LINC00086 | TLE4     | -0.073474187 | 0.124226102 |
| LINC00086 | ANTXR1   | -0.178570679 | 0.000173106 |
| LINC00086 | GPX3     | -0.440630381 | 0           |
| LINC00086 | DPY19L2  | -0.178884848 | 0.00016854  |
| LINC00086 | FAM46C   | -0.215342806 | 5.58E-06    |
| LINC00086 | IL33     | -0.139695608 | 0.003357068 |
| LINC00086 | PEG3     | -0.110633388 | 0.020461557 |
| LINC00086 | FAHD2A   | -0.299171529 | 1.95E-10    |
| LINC00086 | PTGDS    | 0.034008431  | 0.477101756 |
| LINC00086 | CHCHD10  | -0.392560217 | 0           |
| LINC00086 | CD36     | -0.065581234 | 0.170111382 |
| LINC00086 | ANKRD37  | -0.098178528 | 0.039799891 |
| LINC00086 | TSPAN33  | -0.182770334 | 0.00012065  |
| LINC00086 | PRDM16   | -0.13108687  | 0.005979742 |
| LINC00086 | UST      | 0.073809774  | 0.122513149 |

|           |          |              |             |
|-----------|----------|--------------|-------------|
| LINC00086 | NEXN     | -0.142283493 | 0.002831632 |
| LINC00086 | NUPR1L   | -0.067453863 | 0.158276109 |
| LINC00086 | SLC24A3  | -0.326012788 | 3.32E-12    |
| LINC00086 | MARC1    | -0.008360732 | 0.861275912 |
| LINC00086 | MYH11    | -0.053456287 | 0.263607241 |
| LINC00086 | APOA1    | -0.160244122 | 0.000752459 |
| LINC00086 | TMEM178B | -0.114065846 | 0.016846583 |
| LINC00086 | CAPN6    | -0.045850587 | 0.337840117 |
| LINC00086 | PPM1L    | -0.195228315 | 3.95E-05    |
| LINC00086 | FZD8     | -0.246496623 | 1.85E-07    |
| LINC00086 | RCAN2    | -0.094495017 | 0.047881372 |
| LINC00086 | COPZ2    | -0.379600984 | 6.92E-17    |
| LINC00086 | GAS1     | -0.275765282 | 4.89E-09    |
| LINC00086 | DACT1    | -0.190190402 | 6.25E-05    |
| LINC00086 | WBSCR17  | 0.006500396  | 0.891927436 |
| LINC00086 | NCS1     | -0.177951418 | 0.000182448 |
| LINC00086 | SPIRE2   | -0.23577175  | 6.31E-07    |
| LINC00086 | C15orf52 | -0.446144299 | 0           |
| LINC00086 | SPAG5    | -0.27885719  | 3.25E-09    |
| LINC00086 | ARL4D    | -0.242046908 | 3.10E-07    |
| LINC00086 | FAM189A2 | 0.044742807  | 0.349513927 |
| LINC00086 | MAP1LC3A | -0.111657736 | 0.019317983 |
| LINC00086 | KLF6     | -0.159032614 | 0.000837322 |
| LINC00086 | ADD3     | -0.132949191 | 0.005300058 |
| LINC00086 | TSPAN7   | 0.076590491  | 0.109018847 |
| LINC00086 | KLF9     | -0.064590928 | 0.176664261 |
| LINC00086 | KCNQ1    | -0.166522891 | 0.000466775 |
| LINC00086 | MAN1A1   | -0.118522936 | 0.012994355 |
| LINC00086 | MLF1     | -0.187236928 | 8.15E-05    |
| LINC00086 | RARB     | -0.093073951 | 0.051347052 |
| LINC00086 | CDC42EP2 | -0.193474357 | 4.64E-05    |
| LINC00086 | FAM3B    | -0.175542456 | 0.000223477 |
| LINC00086 | GADD45B  | -0.154575382 | 0.001171802 |
| LINC00086 | TMEM47   | -0.005204146 | 0.913383324 |
| LINC00086 | SDF2L1   | -0.052584414 | 0.271483186 |
| LINC00086 | CCDC85A  | -0.230385769 | 1.14E-06    |
| LINC00086 | CRYBG3   | -0.338951171 | 3.95E-13    |
| LINC00086 | FBLN2    | -0.107479356 | 0.024360178 |
| LINC00086 | PEBP4    | -0.12715557  | 0.00767759  |
| LINC00086 | CDADC1   | -0.053809178 | 0.260464593 |
| LINC00086 | FAM63A   | -0.200434305 | 2.42E-05    |
| LINC00086 | GLUL     | -0.222277933 | 2.72E-06    |
| LINC00086 | FREM2    | -0.328526709 | 2.21E-12    |
| LINC00086 | ACKR3    | -0.104010587 | 0.029373827 |
| LINC00086 | DENND6A  | -0.238105964 | 4.85E-07    |
| LINC00086 | CLDN8    | -0.519058372 | 0           |
| LINC00086 | UTS2R    | -0.100748142 | 0.034835846 |
| LINC00086 | SCNN1B   | -0.150524088 | 0.0015786   |
| LINC00086 | TTC30A   | -0.311992613 | 2.93E-11    |
| LINC00086 | CORO2B   | -0.004186039 | 0.930280381 |
| LINC00086 | TC2N     | -0.526415038 | 0           |

|           |          |              |             |
|-----------|----------|--------------|-------------|
| LINC00086 | ALDH2    | -0.232642397 | 8.92E-07    |
| LINC00086 | GPR183   | -0.096093947 | 0.044218514 |
| LINC00086 | C4orf47  | -0.108973326 | 0.022439982 |
| LINC00086 | SLC25A42 | 0.088546935  | 0.063810691 |
| LINC00086 | LGMN     | -0.342221935 | 2.26E-13    |
| LINC00086 | ACSF2    | -0.282026257 | 2.12E-09    |
| LINC00086 | KIAA1467 | -0.25140745  | 1.04E-07    |
| LINC00086 | PRKG1    | -0.024902487 | 0.602679062 |
| LINC00086 | GNAI1    | -0.156265513 | 0.001032641 |
| LINC00086 | ABCC4    | -0.243431522 | 2.64E-07    |
| LINC00086 | PRPS1    | -0.28939115  | 7.75E-10    |
| LINC00086 | TSPAN5   | -0.523104134 | 0           |
| LINC00086 | CR2      | 0.002086424  | 0.965230539 |
| LINC00086 | CCDC170  | -0.395034566 | 0           |
| LINC00086 | RRAD     | -0.125580894 | 0.008470597 |
| LINC00086 | SCGB2A1  | -0.242013577 | 3.11E-07    |
| LINC00086 | SESN3    | -0.201935509 | 2.10E-05    |
| LINC00086 | SGK223   | -0.199027139 | 2.77E-05    |
| LINC00086 | NDRG2    | -0.078509263 | 0.100411604 |
| LINC00086 | C3orf52  | -0.25425483  | 7.37E-08    |
| LINC00086 | FLRT3    | 0.221024802  | 3.10E-06    |
| LINC00086 | MST1R    | 0.101351566  | 0.033794154 |
| LINC00086 | SDC1     | -0.045672124 | 0.339588317 |
| LINC00086 | ST8SIA4  | 0.020633047  | 0.666258304 |
| LINC00086 | UBTD1    | 0.455707242  | 0           |
| LINC00086 | EPHA2    | 0.262574287  | 2.65E-08    |
| LINC00086 | TMEM130  | 0.556518551  | 0           |
| LINC00086 | SPINK2   | 0.158885103  | 0.000846805 |
| LINC00086 | MMP16    | 0.094040997  | 0.048966666 |
| LINC00086 | SIGLEC15 | 0.280621218  | 2.56E-09    |
| LINC00086 | RIN1     | 0.483424204  | 0           |
| LINC00086 | IL1RN    | -0.124324501 | 0.009154879 |
| LINC00086 | FCER1G   | 0.215874128  | 5.29E-06    |
| LINC00086 | CD276    | 0.282696437  | 1.94E-09    |
| LINC00086 | CTSB     | 0.10444319   | 0.028703765 |
| LINC00086 | FAM171A2 | 0.619272262  | 0           |
| LINC00086 | ASPHD1   | 0.319294389  | 9.57E-12    |
| LINC00086 | C15orf48 | -0.153900096 | 0.001232085 |
| LINC00086 | DYSF     | 0.473227816  | 0           |
| LINC00086 | PDZRN4   | 0.548559218  | 0           |
| LINC00086 | EFHD2    | 0.44572588   | 0           |
| LINC00086 | ASF1B    | 0.161088969  | 0.000714963 |
| LINC00086 | AQP1     | 0.437909236  | 0           |
| LINC00086 | ARRDC2   | 0.30506472   | 8.25E-11    |
| LINC00086 | PRSS1    | 0.244796599  | 2.06E-07    |
| LINC00086 | MAPK13   | 0.277999643  | 3.64E-09    |
| LINC00086 | CST5     | 0.018531708  | 0.698601763 |
| LINC00086 | AHR      | 0.11113152   | 0.019898293 |
| LINC00086 | BAX      | 0.209081264  | 1.05E-05    |
| LINC00086 | C1orf115 | 0.45396222   | 0           |
| LINC00086 | PLK3     | 0.242299237  | 3.01E-07    |

|           |          |              |             |
|-----------|----------|--------------|-------------|
| LINC00086 | JAG2     | 0.45286355   | 0           |
| LINC00086 | RAD23B   | 0.28328804   | 1.79E-09    |
| LINC00086 | CA12     | 0.359100838  | 1.05E-14    |
| LINC00086 | ADTRP    | 0.386633127  | 0           |
| LINC00086 | UCP2     | 0.391123549  | 0           |
| LINC00086 | IGFBP2   | 0.24788918   | 1.57E-07    |
| LINC00086 | LOXL2    | 0.293300323  | 4.49E-10    |
| LINC00086 | GPX1     | 0.260647855  | 3.37E-08    |
| LINC00086 | P3H3     | 0.431804424  | 0           |
| LINC00086 | C2orf81  | 0.564739147  | 0           |
| LINC00086 | CDT1     | 0.155323148  | 0.001108228 |
| LINC00086 | SNX25    | 0.502106423  | 0           |
| LINC00086 | MTHFD1L  | 0.106601384  | 0.02555363  |
| LINC00086 | CDC42BPG | 0.183669659  | 0.000108698 |
| LINC00086 | MSN      | 0.206821515  | 1.31E-05    |
| LINC00086 | SIGLEC6  | 0.346883505  | 7.39E-14    |
| LINC00086 | F2R      | 0.159158424  | 0.000829312 |
| LINC00086 | TMEM184A | 0.187792362  | 7.75E-05    |
| LINC00086 | CKS2     | 0.021438966  | 0.654053724 |
| LINC00086 | TAX1BP3  | 0.199832774  | 2.56E-05    |
| LINC00086 | PMEP A1  | 0.308013231  | 5.33E-11    |
| LINC00086 | CXCL16   | 0.124243512  | 0.009200632 |
| LINC00086 | FAXC     | 0.164406965  | 0.00055193  |
| LINC00086 | VTCN1    | -0.019085061 | 0.690060717 |
| LINC00086 | SH2D4A   | 0.30626523   | 6.91E-11    |
| LINC00086 | RNF24    | 0.245000383  | 2.20E-07    |
| LINC00086 | LY6G6C   | 0.081547585  | 0.087899499 |
| LINC00086 | NID1     | 0.197875989  | 3.08E-05    |
| LINC00086 | STAC     | 0.018463649  | 0.699544069 |
| LINC00086 | RAB34    | 0.471189333  | 0           |
| LINC00086 | HES4     | 0.239617238  | 4.09E-07    |
| LINC00086 | EPHA10   | 0.261688656  | 2.96E-08    |
| LINC00086 | ENTPD2   | 0.502025009  | 0           |
| LINC00086 | DDB2     | 0.231172681  | 1.05E-06    |
| LINC00086 | NKAIN4   | 0.363437933  | 4.46E-15    |
| LINC00086 | TRIM29   | 0.185459425  | 9.54E-05    |
| LINC00086 | ADCY8    | 0.222889462  | 2.40E-06    |
| LINC00086 | SFTA2    | -0.046449958 | 0.331420642 |
| LINC00086 | NRIP1    | 0.323693042  | 4.80E-12    |
| LINC00086 | VWA1     | 0.545808145  | 0           |
| LINC00086 | APLNR    | 0.326568364  | 3.03E-12    |
| LINC00086 | REN      | 0.530442738  | 3.17E-33    |
| LINC00086 | EDIL3    | 0.336513275  | 5.96E-13    |
| LINC00086 | AGR N    | 0.274873978  | 5.49E-09    |
| LINC00086 | TREM1    | 0.203450756  | 1.81E-05    |
| LINC00086 | SRL      | 0.335331346  | 7.26E-13    |
| LINC00086 | RASGRF1  | 0.491942516  | 0           |
| LINC00086 | RMI2     | 0.270691626  | 9.47E-09    |
| LINC00086 | SAMD1    | 0.351883313  | 4.09E-14    |
| LINC00086 | MGAT4B   | 0.191749901  | 5.43E-05    |
| LINC00086 | NXN      | 0.217225836  | 4.60E-06    |

|           |          |              |             |
|-----------|----------|--------------|-------------|
| LINC00086 | SH3BGRL3 | 0.204580488  | 1.63E-05    |
| LINC00086 | CA11     | 0.54195982   | 0           |
| LINC00086 | PLD3     | 0.652993614  | 0           |
| LINC00086 | LURAP1L  | -0.075199494 | 0.115614781 |
| LINC00086 | CARNS1   | 0.401518934  | 0           |
| LINC00086 | PDLIM7   | 0.431841585  | 0           |
| LINC00086 | BCL2L1   | 0.142370297  | 0.002814684 |
| LINC00086 | GGT6     | 0.400046239  | 0           |
| LINC00086 | DPYSL3   | 0.230226911  | 1.16E-06    |
| LINC00086 | FYN      | 0.51196921   | 0           |
| LINC00086 | TK1      | 0.074063804  | 0.121228772 |
| LINC00086 | AK1      | 0.46648034   | 0           |
| LINC00086 | HIGD1B   | 0.504347024  | 0           |
| LINC00086 | TMEM59L  | 0.231583016  | 1.00E-06    |
| LINC00086 | MEGF9    | 0.138444387  | 0.003680881 |
| LINC00086 | ZFP36L1  | 0.158097765  | 0.00089912  |
| LINC00086 | ADRA1B   | 0.367736875  | 1.80E-15    |
| LINC00086 | EPHA4    | 0.117538445  | 0.013771015 |
| LINC00086 | TCERG1L  | 0.382859692  | 6.55E-18    |
| LINC00086 | NGFR     | 0.404513967  | 0           |
| LINC00086 | EBI3     | 0.131863286  | 0.005687386 |
| LINC00086 | S100A10  | -0.003167365 | 0.947218284 |
| LINC00086 | S100B    | 0.174541937  | 0.000242935 |
| LINC00086 | CD44     | 0.553071341  | 0           |
| LINC00086 | BHLHE41  | 0.213537645  | 6.70E-06    |
| LINC00086 | FBXO2    | 0.492478235  | 0           |
| LINC00086 | SLC30A2  | -0.234360329 | 7.38E-07    |
| LINC00086 | FRMD5    | -0.034168565 | 0.475028747 |
| LINC00086 | SAMD11   | 0.310531974  | 3.66E-11    |
| LINC00086 | SIPA1L2  | 0.414693476  | 0           |
| LINC00086 | S100A16  | 0.072297506  | 0.130379832 |
| LINC00086 | PPL      | -0.046600164 | 0.329858121 |
| LINC00086 | ARHGD1B  | 0.356125237  | 1.86E-14    |
| LINC00086 | CDC42EP3 | 0.07402721   | 0.121413141 |
| LINC00086 | RUNX2    | 0.510367301  | 0           |
| LINC00086 | LAMC2    | -0.010059373 | 0.833468198 |
| LINC00086 | BRINP1   | 0.44002658   | 0           |
| LINC00086 | GPRC5B   | 0.265253023  | 1.89E-08    |
| LINC00086 | AQP5     | 0.474055577  | 0           |
| LINC00086 | PLAG1    | 0.58562509   | 0           |
| LINC00086 | PTPRU    | 0.125208288  | 0.008668613 |
| LINC00086 | ANGPTL4  | 0.06332106   | 0.185339185 |
| LINC00086 | PALM3    | 0.245809989  | 2.01E-07    |
| LINC00086 | ACP5     | 0.17177512   | 0.000305315 |
| LINC00086 | DLG4     | 0.655389669  | 0           |
| LINC00086 | ETNK2    | 0.525717909  | 0           |
| LINC00086 | CD109    | 0.31305781   | 2.50E-11    |
| LINC00086 | SNX22    | 0.373348094  | 4.84E-16    |
| LINC00086 | TMEM98   | 0.198818355  | 2.82E-05    |
| LINC00086 | CTHRC1   | 0.184698894  | 0.000101946 |
| LINC00086 | S100A2   | -0.01748327  | 0.714782134 |



|           |          |              |             |
|-----------|----------|--------------|-------------|
| LINC00086 | C11orf80 | 0.218733706  | 3.94E-06    |
| LINC00086 | SREBF1   | 0.279861397  | 2.84E-09    |
| LINC00086 | PRSS22   | 0.217235765  | 4.60E-06    |
| LINC00086 | CMTM3    | 0.228690673  | 1.37E-06    |
| LINC00086 | RDH5     | 0.375439908  | 2.77E-16    |
| LINC00086 | MYH10    | 0.255415484  | 6.40E-08    |
| LINC00086 | EVPL     | 0.235416448  | 6.56E-07    |
| LINC00086 | SCD      | 0.173435607  | 0.000266291 |
| LINC00086 | CD151    | 0.409961931  | 0           |
| LINC00086 | S100A4   | 0.26979862   | 1.06E-08    |
| LINC00086 | BNIP1    | 0.430031318  | 0           |
| LINC00086 | MAP3K6   | 0.245978775  | 1.97E-07    |
| LINC00086 | MANEAL   | 0.235796146  | 6.29E-07    |
| LINC00086 | CD207    | 0.252318223  | 8.39E-08    |
| LINC00086 | CD1A     | 0.250945864  | 9.91E-08    |
| LINC00086 | C3       | 0.200554441  | 2.39E-05    |
| LINC00086 | NT5E     | 0.11556932   | 0.015448006 |
| LINC00086 | CACNG4   | 0.149354321  | 0.001700951 |
| LINC00086 | FHOD1    | 0.309291892  | 4.40E-11    |
| LINC00086 | LEMD1    | 0.278303883  | 3.49E-09    |
| LINC00086 | ATP11A   | 0.53101893   | 0           |
| LINC00086 | PPAP2C   | 0.328077369  | 2.38E-12    |
| LINC00086 | DRAM1    | 0.237747116  | 5.05E-07    |
| LINC00086 | CDA      | 0.405832627  | 0           |
| LINC00086 | CCND2    | 0.521828876  | 0           |
| LINC00086 | LCN6     | 0.412500688  | 1.83E-19    |
| LINC00086 | CDH4     | 0.146413506  | 0.0021205   |
| LINC00086 | MMP11    | 0.212474292  | 7.46E-06    |
| LINC00086 | B3GAT1   | 0.16078175   | 0.000732125 |
| LINC00086 | SPP1     | 0.102139329  | 0.032428992 |
| LINC00086 | HLA-DQB1 | -0.011526253 | 0.809619311 |
| LINC00086 | SDC3     | 0.478552098  | 0           |
| LINC00086 | CX3CL1   | 0.140176502  | 0.003272604 |
| LINC00086 | SDK1     | 0.533109325  | 0           |
| LINC00086 | DOCK9    | 0.233926874  | 7.74E-07    |
| LINC00086 | CSF2     | 0.30152986   | 1.11E-10    |
| LINC00086 | GRHL3    | 0.246913199  | 1.76E-07    |
| LINC00086 | TMEM92   | 0.244147914  | 2.23E-07    |
| LINC00086 | BASP1    | 0.214529228  | 6.06E-06    |
| LINC00086 | HRH1     | 0.179267525  | 0.00016313  |
| LINC00086 | ESM1     | 0.262535566  | 2.67E-08    |
| LINC00086 | B4GALNT3 | 0.066088869  | 0.166823612 |
| LINC00086 | LMO3     | 0.302111529  | 1.27E-10    |
| LINC00086 | C9orf16  | 0.141286945  | 0.003032974 |
| LINC00086 | SEMA3F   | 0.584983703  | 0           |
| LINC00086 | PLA2G12B | 0.611142094  | 2.64E-46    |
| LINC00086 | KLK6     | 0.323086501  | 4.00E-12    |
| LINC00086 | ST3GAL5  | 0.604137956  | 0           |
| LINC00086 | FAM132B  | 0.229298445  | 1.29E-06    |
| LINC00086 | CDKN1A   | 0.058966802  | 0.217467597 |
| LINC00086 | E2F1     | 0.152206702  | 0.001396034 |

|           |          |              |             |
|-----------|----------|--------------|-------------|
| LINC00086 | B3GNT8   | 0.442955801  | 0           |
| LINC00086 | MTMR11   | 0.357632965  | 1.40E-14    |
| LINC00086 | MYO1G    | 0.135167524  | 0.004581767 |
| LINC00086 | TMSB10   | 0.258976163  | 4.14E-08    |
| LINC00086 | UNC5CL   | 0.117765526  | 0.013588333 |
| LINC00086 | ABR      | 0.231574647  | 1.00E-06    |
| LINC00086 | PLP2     | 0.282646794  | 1.95E-09    |
| LINC00086 | SRCIN1   | 0.273130799  | 6.90E-09    |
| LINC00086 | PDE9A    | 0.150749326  | 0.001552952 |
| LINC00086 | TREM2    | 0.231328276  | 1.03E-06    |
| LINC00086 | KDELR3   | 0.211653197  | 8.10E-06    |
| LINC00086 | PC       | 0.282578571  | 1.97E-09    |
| LINC00086 | C2CD4A   | -0.094695291 | 0.047409084 |
| LINC00086 | PELI1    | 0.231881016  | 9.70E-07    |
| LINC00086 | SSX1     | 0.226877285  | 1.67E-06    |
| LINC00086 | MROH6    | 0.333458245  | 9.90E-13    |
| LINC00086 | ESPN     | 0.5368951    | 0           |
| LINC00086 | BMP1     | 0.5717442    | 0           |
| LINC00086 | TM4SF4   | 0.296116142  | 2.47E-10    |
| LINC00086 | CORO2A   | 0.370767651  | 9.08E-16    |
| LINC00086 | CD164L2  | 0.279867222  | 2.42E-09    |
| LINC00086 | CTSS     | 0.08707495   | 0.068364298 |
| LINC00086 | CLU      | 0.287476349  | 1.01E-09    |
| LINC00086 | TMSB4X   | 0.255909077  | 6.03E-08    |
| LINC00086 | WNT10A   | 0.361477686  | 5.36E-15    |
| LINC00086 | NAPSA    | 0.287736762  | 9.74E-10    |
| LINC00086 | PLEKHA4  | 0.380354281  | 4.95E-17    |
| LINC00086 | SFTPA1   | 0.460412273  | 2.03E-24    |
| LINC00086 | C1orf116 | 0.199539313  | 2.64E-05    |
| LINC00086 | TM4SF1   | 0.058662845  | 0.21985102  |
| LINC00086 | SEL1L3   | 0.142805312  | 0.002731132 |
| LINC00086 | VASN     | 0.290880723  | 6.30E-10    |
| LINC00086 | NPTXR    | 0.10989697   | 0.02131966  |
| LINC00086 | PDE4C    | 0.155748517  | 0.001073499 |
| LINC00086 | CDC42EP1 | 0.235696718  | 6.36E-07    |
| LINC00086 | ENDOD1   | 0.254180791  | 7.43E-08    |
| LINC00086 | RYR1     | 0.431270549  | 0           |
| LINC00086 | IL1RAP   | 0.269529271  | 1.10E-08    |
| LINC00086 | SLC35F2  | 0.255968799  | 5.37E-08    |
| LINC00086 | ISYNA1   | 0.633032733  | 0           |
| LINC00086 | HLA-G    | -0.014766522 | 0.757588236 |
| LINC00086 | CDKN2B   | 0.03903216   | 0.41446947  |
| LINC00086 | ALDH1A3  | 0.065524783  | 0.170479968 |
| LINC00086 | CLIP3    | 0.523054491  | 0           |
| LINC00086 | ULBP2    | 0.215877816  | 5.29E-06    |
| LINC00086 | ETHE1    | 0.114186834  | 0.016730071 |
| LINC00086 | XPR1     | 0.306392316  | 6.78E-11    |
| LINC00086 | SPTBN2   | 0.159166225  | 0.000828818 |
| LINC00086 | IVL      | 0.271549288  | 7.37E-09    |
| LINC00086 | MARCO    | 0.075478913  | 0.114265285 |
| LINC00086 | PLXND1   | 0.617749357  | 0           |

|           |          |             |             |
|-----------|----------|-------------|-------------|
| LINC00086 | EMILIN2  | 0.285685229 | 1.29E-09    |
| LINC00086 | PLAUR    | 0.138286664 | 0.003720262 |
| LINC00086 | CDC42EP5 | 0.309581524 | 4.22E-11    |
| LINC00086 | TRPC5    | 0.613732413 | 8.67E-47    |
| LINC00086 | TMEM100  | 0.364925238 | 3.28E-15    |
| LINC00086 | QSOX1    | 0.310185466 | 3.85E-11    |
| LINC00086 | ARHGAP23 | 0.450895843 | 0           |
| LINC00086 | MDFI     | 0.413500626 | 0           |
| LINC00086 | FSTL3    | 0.138372476 | 0.003698789 |
| LINC00086 | INF2     | 0.385210359 | 0           |
| LINC00086 | TGFBR1   | 0.343324861 | 1.87E-13    |
| LINC00086 | TGFBI    | 0.312771015 | 2.61E-11    |
| LINC00086 | ERBB3    | 0.086440938 | 0.070406081 |
| LINC00086 | CCL18    | 0.120189665 | 0.011767299 |
| LINC00086 | CCL17    | 0.051748996 | 0.279298951 |
| LINC00086 | C16orf45 | 0.464732481 | 0           |
| LINC00086 | PRDM1    | 0.507117955 | 0           |
| LINC00086 | TRIM47   | 0.172890527 | 0.000278555 |
| LINC00086 | CNFN     | 0.106946899 | 0.025078071 |
| LINC00086 | ARMCX3   | 0.438585515 | 0           |
| LINC00086 | RAMP1    | 0.393789236 | 0           |
| LINC00086 | GABRD    | 0.474118411 | 0           |
| LINC00086 | COL13A1  | 0.498227036 | 0           |
| LINC00086 | S100A5   | 0.251994514 | 9.67E-08    |
| LINC00086 | MISP     | 0.01436101  | 0.764045441 |
| LINC00086 | HES6     | 0.279050088 | 3.16E-09    |
| LINC00086 | PSD3     | 0.274507471 | 5.77E-09    |
| LINC00086 | DOK7     | 0.22385346  | 2.31E-06    |
| LINC00086 | ZMAT3    | 0.20142447  | 2.20E-05    |
| LINC00086 | MFAP2    | 0.498602762 | 0           |
| LINC00086 | TMEM79   | 0.423889628 | 0           |
| LINC00086 | SLC1A5   | 0.238590621 | 4.59E-07    |
| LINC00086 | BBC3     | 0.292802475 | 4.81E-10    |
| LINC00086 | HLA-DQB2 | 0.12210404  | 0.010485345 |
| LINC00086 | C1QL1    | 0.450287362 | 0           |
| LINC00086 | TMEM215  | 0.400479331 | 2.43E-18    |
| LINC00086 | PNP      | 0.23853573  | 4.62E-07    |
| LINC00086 | ARNTL    | 0.281741448 | 2.21E-09    |
| LINC00086 | CLDN2    | 0.483814202 | 3.87E-27    |
| LINC00086 | MVP      | 0.259418269 | 3.92E-08    |
| LINC00086 | LGALS1   | 0.236856237 | 5.58E-07    |
| LINC00086 | BIRC7    | 0.366745268 | 2.01E-15    |
| LINC00086 | COL8A1   | 0.277411444 | 3.93E-09    |
| LINC00086 | PERP     | 0.022471399 | 0.638553048 |
| LINC00086 | GJA4     | 0.475558767 | 0           |
| LINC00086 | IGFL2    | 0.374573058 | 4.53E-16    |
| LINC00086 | DAPK2    | 0.197086382 | 3.32E-05    |
| LINC00086 | MAMLD1   | 0.332116465 | 1.23E-12    |
| LINC00086 | ETV5     | 0.561625964 | 0           |
| LINC00086 | RUNX1    | 0.115599106 | 0.01542136  |
| LINC00086 | LONRF2   | 0.410065614 | 0           |

|           |           |              |             |
|-----------|-----------|--------------|-------------|
| LINC00086 | SPOCK1    | 0.442727443  | 0           |
| LINC00086 | XKRX      | 0.407595378  | 0           |
| LINC00086 | TGFB1     | 0.501682472  | 0           |
| LINC00086 | ERP27     | 0.154184195  | 0.001206384 |
| LINC00086 | TNFRSF10C | 0.277394707  | 3.94E-09    |
| LINC00086 | PALM      | 0.328309131  | 2.29E-12    |
| LINC00086 | TSC22D1   | 0.602071106  | 0           |
| LINC00086 | TGM2      | 0.073791477  | 0.122606066 |
| LINC00086 | UBE2QL1   | 0.455865249  | 0           |
| LINC00086 | ECE1      | 0.440505281  | 0           |
| LINC00086 | COL8A2    | 0.265076578  | 1.94E-08    |
| LINC00086 | HIST3H2A  | 0.050526499  | 0.290705484 |
| LINC00086 | TNFRSF21  | 0.11663863   | 0.014516342 |
| LINC00086 | SOX4      | 0.24203471   | 3.10E-07    |
| LINC00086 | ELF3      | 0.062743641  | 0.18938608  |
| LINC00086 | TPD52L1   | 0.220570214  | 3.26E-06    |
| LINC00086 | INHBB     | 0.465568185  | 0           |
| LINC00086 | HPN       | 0.345608581  | 1.26E-13    |
| LINC00086 | MMP7      | 0.010636104  | 0.82414104  |
| LINC00086 | RAB27A    | 0.352966807  | 3.35E-14    |
| LINC00086 | IGF2BP2   | 0.462671871  | 0           |
| LINC00086 | ITGB4     | 0.264296332  | 2.14E-08    |
| LINC00086 | PPP1R1B   | 0.539706879  | 0           |
| LINC00086 | NPDC1     | 0.489547029  | 0           |
| LINC00086 | CCL13     | 0.200814855  | 2.25E-05    |
| LINC00086 | SPINT1    | 0.11910305   | 0.012555029 |
| LINC00086 | HEY2      | 0.612677261  | 0           |
| LINC00086 | CST2      | -0.051478309 | 0.281824912 |
| LINC00086 | ADM       | 0.269760607  | 1.07E-08    |
| LINC00086 | VSTM2L    | -0.007681048 | 0.87245297  |
| LINC00086 | FAM84A    | 0.302570372  | 1.19E-10    |
| LINC00086 | P4HA2     | 0.347437996  | 9.10E-14    |
| LINC00086 | LPL       | 0.461992613  | 0           |
| LINC00086 | TMEM173   | 0.421791999  | 0           |
| LINC00086 | DHRS3     | 0.389769146  | 0           |
| LINC00086 | SCN1B     | 0.323035059  | 5.32E-12    |
| LINC00086 | GLT1D1    | 0.50710065   | 0           |
| LINC00086 | PHYHIP    | 0.508153224  | 0           |
| LINC00086 | BHLHE40   | 0.188075043  | 7.56E-05    |
| LINC00086 | BID       | 0.322741031  | 5.58E-12    |
| LINC00086 | POSTN     | 0.066632248  | 0.163357382 |
| LINC00086 | ITGA3     | 0.108094078  | 0.023553525 |
| LINC00086 | RSPO4     | 0.339602487  | 3.54E-13    |
| LINC00086 | ADAMTS9   | 0.663991098  | 0           |
| LINC00086 | ABTB2     | 0.141398996  | 0.003009703 |
| LINC00086 | KCNQ3     | 0.128373525  | 0.007110464 |
| LINC00086 | ANXA1     | 0.296549386  | 2.83E-10    |
| LINC00086 | S100A11   | 0.225711526  | 1.89E-06    |
| LINC00086 | CEACAM6   | 0.02991372   | 0.531895601 |
| LINC00086 | IER5L     | 0.274846178  | 5.51E-09    |
| LINC00086 | KRT80     | 0.014924528  | 0.75507674  |

|           |            |              |             |
|-----------|------------|--------------|-------------|
| LINC00086 | CDH6       | 0.130383641  | 0.00625612  |
| LINC00086 | UNC5B      | 0.327311023  | 2.69E-12    |
| LINC00086 | PLEKHN1    | 0.312630455  | 2.66E-11    |
| LINC00086 | SYTL1      | 0.356764922  | 1.65E-14    |
| LINC00086 | TMEM163    | 0.155151241  | 0.001122556 |
| LINC00086 | C4orf48    | 0.377066354  | 1.71E-16    |
| LINC00086 | B3GNT7     | 0.498367313  | 0           |
| LINC00086 | BAIAP3     | 0.532282982  | 0           |
| LINC00086 | PHLDA2     | 0.244600402  | 2.31E-07    |
| LINC00086 | GAP43      | 0.314230342  | 1.62E-11    |
| LINC00086 | S100A1     | 0.066311412  | 0.165397397 |
| LINC00086 | PTPRE      | 0.24728155   | 1.69E-07    |
| LINC00086 | CCND1      | 0.329394611  | 1.92E-12    |
| LINC00086 | ST6GALNAC5 | -0.033772012 | 0.480321148 |
| LINC00086 | KRT17      | 0.280143085  | 2.73E-09    |
| LINC00086 | HPCAL4     | 0.607320924  | 0           |
| LINC00086 | GABBR2     | 0.396591512  | 0           |
| LINC00086 | DIRAS3     | 0.556961508  | 0           |
| LINC00086 | SERINC2    | 0.122306584  | 0.010357243 |
| LINC00086 | PTCHD4     | 0.351363197  | 4.50E-14    |
| LINC00086 | EPS8       | 0.42960992   | 0           |
| LINC00086 | LY6E       | 0.371471872  | 7.69E-16    |
| LINC00086 | UPP1       | 0.086879072  | 0.068989856 |
| LINC00086 | AHNAK2     | 0.078333953  | 0.101174874 |
| LINC00086 | PLXNC1     | 0.520694747  | 0           |
| LINC00086 | TNC        | 0.017827367  | 0.709420523 |
| LINC00086 | DUSP4      | 0.505713767  | 0           |
| LINC00086 | NRCAM      | 0.372435656  | 6.08E-16    |
| LINC00086 | NRP2       | 0.595117399  | 0           |
| LINC00086 | CTSC       | 0.25991782   | 3.69E-08    |
| LINC00086 | AMIGO2     | 0.550241123  | 0           |
| LINC00086 | NAB2       | 0.424966456  | 0           |
| LINC00086 | TBC1D2     | 0.075667982  | 0.113359185 |
| LINC00086 | PHLDA3     | 0.213903868  | 6.46E-06    |
| LINC00086 | PTP4A3     | 0.390770516  | 0           |
| LINC00086 | CRABP2     | 0.463731962  | 0           |
| LINC00086 | GOS2       | 0.363655795  | 4.26E-15    |
| LINC00086 | S100A6     | 0.095515252  | 0.045515994 |
| LINC00086 | FOXQ1      | 0.170163283  | 0.000348249 |
| LINC00086 | LRG1       | 0.300218146  | 1.67E-10    |
| LINC00086 | LAMP5      | 0.321969721  | 6.30E-12    |
| LINC00086 | ALDH3B1    | 0.153371469  | 0.001281255 |
| LINC00086 | CDH2       | 0.514860276  | 0           |
| LINC00086 | SCG5       | 0.565679669  | 0           |
| LINC00086 | ZCCHC16    | 0.625159961  | 5.62E-49    |
| LINC00086 | GRB7       | 0.299637322  | 1.82E-10    |
| LINC00086 | TIAM1      | 0.330590581  | 1.58E-12    |
| LINC00086 | FXYD5      | 0.476395606  | 0           |
| LINC00086 | CLDN9      | 0.316495517  | 1.48E-11    |
| LINC00086 | FAM43A     | 0.263768698  | 2.28E-08    |
| LINC00086 | CHST2      | 0.443092106  | 0           |

|           |         |              |             |
|-----------|---------|--------------|-------------|
| LINC00086 | HMGA2   | 0.627763484  | 0           |
| LINC00086 | GALNT7  | 0.367757725  | 1.79E-15    |
| LINC00086 | CBLN1   | 0.07412678   | 0.120911998 |
| LINC00086 | STRA6   | 0.354139375  | 2.70E-14    |
| LINC00086 | MUC21   | 0.165475445  | 0.0004991   |
| LINC00086 | PRR36   | 0.470745524  | 0           |
| LINC00086 | NFE2L3  | 0.218558254  | 4.01E-06    |
| LINC00086 | NR1D1   | 0.085208657  | 0.074517248 |
| LINC00086 | MUC1    | -0.077890712 | 0.103125228 |
| LINC00086 | NAT8L   | 0.712944482  | 0           |
| LINC00086 | APOC1   | 0.503496427  | 0           |
| LINC00086 | EVA1A   | 0.154615948  | 0.001168269 |
| LINC00086 | ENTPD1  | 0.436960203  | 0           |
| LINC00086 | COL1A1  | 0.185636437  | 9.39E-05    |
| LINC00086 | FNDC4   | 0.21767546   | 4.40E-06    |
| LINC00086 | FRMD3   | 0.507767285  | 0           |
| LINC00086 | SHROOM4 | 0.51045056   | 0           |
| LINC00086 | NELL2   | 0.571461944  | 0           |
| LINC00086 | EPHB3   | 0.211738866  | 8.04E-06    |
| LINC00086 | TMC6    | 0.362530318  | 5.36E-15    |
| LINC00086 | NOD1    | 0.505045714  | 0           |
| LINC00086 | GGCT    | 0.328717906  | 2.15E-12    |
| LINC00086 | ICAM1   | 0.25072493   | 1.12E-07    |
| LINC00086 | PRSS23  | 0.384761302  | 0           |
| LINC00086 | CFI     | 0.38980886   | 0           |
| LINC00086 | CD55    | 0.055518315  | 0.245610325 |
| LINC00086 | RASD2   | 0.347212049  | 9.47E-14    |
| LINC00086 | KLK11   | 0.335539572  | 5.17E-13    |
| LINC00086 | ICAM5   | 0.476680841  | 0           |
| LINC00086 | ADORA1  | 0.24495769   | 2.22E-07    |
| LINC00086 | ITGA2   | 0.153971582  | 0.001225571 |
| LINC00086 | ABCC3   | 0.330538527  | 1.60E-12    |
| LINC00086 | MFGE8   | 0.254075832  | 7.53E-08    |
| LINC00086 | STK32A  | 0.248772967  | 1.42E-07    |
| LINC00086 | CYSLTR2 | 0.457925008  | 0           |
| LINC00086 | LAD1    | 0.226911468  | 1.66E-06    |
| LINC00086 | MGAT3   | 0.129358159  | 0.006679721 |
| LINC00086 | IGFBP6  | 0.424572857  | 0           |
| LINC00086 | CYP2S1  | 0.160137242  | 0.000769374 |
| LINC00086 | KCNJ2   | 0.524438112  | 0           |
| LINC00086 | FAM20A  | 0.398378092  | 0           |
| LINC00086 | TGFA    | 0.538809901  | 0           |
| LINC00086 | MXRA8   | 0.345686875  | 1.24E-13    |
| LINC00086 | C8orf4  | 0.271677394  | 8.33E-09    |
| LINC00086 | CLDN10  | 0.352967008  | 2.52E-14    |
| LINC00086 | PDE5A   | 0.374698242  | 3.39E-16    |
| LINC00086 | APOE    | 0.578916336  | 0           |
| LINC00086 | SPOCK2  | 0.133327613  | 0.005170768 |
| LINC00086 | TENM1   | 0.62521155   | 0           |
| LINC00086 | SLIT1   | 0.574618955  | 0           |
| LINC00086 | CXCL14  | 0.335930891  | 6.57E-13    |

|           |           |              |             |
|-----------|-----------|--------------|-------------|
| LINC00086 | ECM1      | 0.514744537  | 0           |
| LINC00086 | DUSP5     | 0.117565394  | 0.013749223 |
| LINC00086 | SEZ6L2    | 0.395917218  | 0           |
| LINC00086 | THRSP     | 0.240320609  | 3.78E-07    |
| LINC00086 | C19orf33  | 0.081319057  | 0.088792077 |
| LINC00086 | MPZL2     | 0.359902785  | 9.02E-15    |
| LINC00086 | CTSH      | 0.364958711  | 3.26E-15    |
| LINC00086 | CYP1B1    | 0.296129407  | 3.01E-10    |
| LINC00086 | ALOX5     | 0.006417421  | 0.893298665 |
| LINC00086 | SYTL5     | 0.388718643  | 2.76E-17    |
| LINC00086 | TNFRSF12A | 0.290254654  | 6.88E-10    |
| LINC00086 | DUSP6     | 0.286023795  | 1.23E-09    |
| LINC00086 | ALOX15B   | 0.067293209  | 0.159214423 |
| LINC00086 | SDC4      | 0.411421861  | 0           |
| LINC00086 | MDK       | 0.519820179  | 0           |
| LINC00086 | KRT19     | 0.050922225  | 0.286939958 |
| LINC00086 | MET       | 0.195011446  | 4.02E-05    |
| LINC00086 | TESC      | 0.662698253  | 0           |
| LINC00086 | CXCL17    | 0.011217615  | 0.814695878 |
| LINC00086 | NPC2      | 0.468278267  | 0           |
| LINC00086 | COMP      | 0.282822531  | 1.91E-09    |
| LINC00086 | TUSC3     | 0.499552929  | 0           |
| LINC00086 | TMPRSS4   | 0.132290925  | 0.005531912 |
| LINC00086 | LGALS3    | 0.154769841  | 0.001154954 |
| LINC00086 | CRLF1     | 0.170120164  | 0.000349471 |
| LINC00086 | CTXN1     | 0.275608694  | 4.99E-09    |
| LINC00086 | PCSK1N    | 0.397789468  | 0           |
| LINC00086 | NMU       | 0.137769829  | 0.003825889 |
| LINC00086 | GALE      | 0.460283476  | 0           |
| LINC00086 | PCSK2     | 0.298599926  | 2.11E-10    |
| LINC00086 | GJB3      | 0.410512117  | 0           |
| LINC00086 | SLPI      | -0.029587509 | 0.536235351 |
| LINC00086 | AGR2      | 0.254995078  | 6.74E-08    |
| LINC00086 | MRC2      | 0.302245991  | 1.25E-10    |
| LINC00086 | GOLT1A    | 0.517891052  | 0           |
| LINC00086 | SLC27A6   | 0.211806388  | 7.60E-06    |
| LINC00086 | KCNN4     | 0.200992293  | 2.30E-05    |
| LINC00086 | ETV4      | 0.441512553  | 2.27E-22    |
| LINC00086 | SYT12     | 0.378525149  | 1.05E-16    |
| LINC00086 | PVRL4     | 0.197135315  | 3.30E-05    |
| LINC00086 | PLCD3     | 0.223632761  | 2.36E-06    |
| LINC00086 | PLAU      | 0.2180353    | 4.24E-06    |
| LINC00086 | LRRK2     | 0.661178184  | 0           |
| LINC00086 | SFN       | 0.080662918  | 0.091403814 |
| LINC00086 | LPAR5     | 0.306686061  | 6.49E-11    |
| LINC00086 | NGEF      | 0.224849724  | 2.07E-06    |
| LINC00086 | DTX4      | 0.208582423  | 1.10E-05    |
| LINC00086 | CST6      | 0.320148957  | 8.38E-12    |
| LINC00086 | QPCT      | 0.565376705  | 0           |
| LINC00086 | TIMP1     | 0.442440223  | 0           |
| LINC00086 | CAMK2N1   | 0.494627068  | 0           |

|            |          |              |             |
|------------|----------|--------------|-------------|
| LINC00086  | KLHDC8A  | 0.459328628  | 0           |
| LINC00086  | PDLIM4   | 0.216583881  | 4.92E-06    |
| LINC00086  | SCEL     | 0.169262333  | 0.000374638 |
| LINC00086  | LCN2     | -0.06392486  | 0.181176003 |
| LINC00086  | PROS1    | 0.112454151  | 0.01846776  |
| LINC00086  | GABRB2   | 0.258460727  | 4.41E-08    |
| LINC00086  | TMPRSS6  | 0.201390571  | 2.21E-05    |
| LINC00086  | KLK7     | 0.130362057  | 0.00623268  |
| LINC00086  | PDZK1IP1 | 0.186504197  | 8.69E-05    |
| LINC00086  | CDH3     | 0.531213672  | 0           |
| LINC00086  | LRP4     | 0.714300161  | 0           |
| LINC00086  | IGSF1    | 0.319962442  | 8.62E-12    |
| LINC00086  | B3GNT3   | -0.004385888 | 0.92696087  |
| LINC00086  | CLDN1    | 0.206449334  | 1.36E-05    |
| LINC00086  | GDF15    | 0.024701787  | 0.60560619  |
| LINC00086  | ARHGAP36 | 0.287342826  | 8.62E-10    |
| LINC00086  | LAMB3    | 0.185259576  | 9.70E-05    |
| LINC00086  | KLK10    | 0.229605664  | 1.24E-06    |
| LINC00086  | DPP4     | 0.082500277  | 0.084241688 |
| LINC00086  | METTL7B  | 0.432140578  | 0           |
| LINC00086  | LIPH     | 0.277138975  | 4.08E-09    |
| LINC00086  | CLDN16   | 0.187399331  | 8.03E-05    |
| LINC00086  | CHI3L1   | 0.15142674   | 0.001478102 |
| LINC00086  | SLC22A31 | 0.498132253  | 6.57E-29    |
| LINC00086  | TACSTD2  | 0.217403842  | 4.52E-06    |
| LINC00086  | SFTPB    | 0.070647231  | 0.13940449  |
| LINC00086  | RXRG     | 0.659396143  | 0           |
| LINC00086  | DCSTAMP  | 0.163339134  | 0.000591072 |
| LINC00086  | CITED1   | 0.356039     | 1.89E-14    |
| LINC00086  | SERPINA1 | 0.345628863  | 1.25E-13    |
| LINC00086  | PRR15    | 0.644071775  | 0           |
| LINC00086  | SLC34A2  | -0.001728002 | 0.971189976 |
| LINC00086  | FN1      | 0.077690296  | 0.104016834 |
| LINC00086  | ZCCHC12  | 0.544756139  | 0           |
| ABHD11-AS1 | TFF3     | -0.444559269 | 0           |
| ABHD11-AS1 | CCL21    | -0.311767061 | 2.38E-11    |
| ABHD11-AS1 | TPO      | -0.465693286 | 0           |
| ABHD11-AS1 | MT1G     | -0.35264739  | 3.56E-14    |
| ABHD11-AS1 | DIO1     | -0.489811697 | 0           |
| ABHD11-AS1 | DPT      | -0.241175759 | 3.15E-07    |
| ABHD11-AS1 | CDH16    | -0.412055163 | 0           |
| ABHD11-AS1 | CRABP1   | -0.290634984 | 5.41E-10    |
| ABHD11-AS1 | SLC26A7  | -0.446809799 | 0           |
| ABHD11-AS1 | MT1H     | -0.318582128 | 8.21E-12    |
| ABHD11-AS1 | SLC26A4  | -0.499937733 | 0           |
| ABHD11-AS1 | SLC5A8   | -0.409117517 | 3.83E-19    |
| ABHD11-AS1 | PKHD1L1  | -0.42999211  | 3.50E-21    |
| ABHD11-AS1 | TFCP2L1  | -0.441761958 | 0           |
| ABHD11-AS1 | WSCD2    | -0.510153996 | 1.84E-30    |
| ABHD11-AS1 | IPCEF1   | -0.490461453 | 0           |
| ABHD11-AS1 | SLC5A5   | -0.388015704 | 3.19E-17    |



|            |           |              |             |
|------------|-----------|--------------|-------------|
| ABHD11-AS1 | MT1F      | -0.356039992 | 1.89E-14    |
| ABHD11-AS1 | FOSB      | -0.358136203 | 1.27E-14    |
| ABHD11-AS1 | SEMA3D    | -0.531060081 | 2.59E-33    |
| ABHD11-AS1 | BMP8A     | -0.571084231 | 0           |
| ABHD11-AS1 | MATN2     | -0.445723043 | 0           |
| ABHD11-AS1 | PLA2R1    | -0.485813025 | 0           |
| ABHD11-AS1 | COL23A1   | -0.373038747 | 5.23E-16    |
| ABHD11-AS1 | HGD       | -0.492303208 | 0           |
| ABHD11-AS1 | TCEAL2    | -0.404831115 | 0           |
| ABHD11-AS1 | CHRDL1    | -0.342364352 | 1.62E-13    |
| ABHD11-AS1 | TNFRSF11B | -0.428515362 | 0           |
| ABHD11-AS1 | FAM167A   | -0.543745692 | 0           |
| ABHD11-AS1 | KIT       | -0.524341521 | 0           |
| ABHD11-AS1 | SLC4A4    | -0.519991234 | 0           |
| ABHD11-AS1 | SMOC2     | -0.406688188 | 0           |
| ABHD11-AS1 | FHL1      | -0.564590786 | 0           |
| ABHD11-AS1 | OTOS      | -0.345275121 | 1.33E-13    |
| ABHD11-AS1 | IGFBPL1   | -0.457108233 | 4.74E-24    |
| ABHD11-AS1 | HBB       | -0.329655875 | 1.84E-12    |
| ABHD11-AS1 | BEX1      | -0.441614305 | 0           |
| ABHD11-AS1 | FABP4     | -0.456146577 | 6.05E-24    |
| ABHD11-AS1 | LMOD1     | -0.557939333 | 0           |
| ABHD11-AS1 | SOD3      | -0.358941413 | 1.09E-14    |
| ABHD11-AS1 | TMEM171   | -0.345075273 | 1.38E-13    |
| ABHD11-AS1 | PI16      | -0.284203457 | 1.58E-09    |
| ABHD11-AS1 | ZMAT4     | -0.489601801 | 7.63E-28    |
| ABHD11-AS1 | MFAP4     | -0.26366927  | 2.31E-08    |
| ABHD11-AS1 | CWH43     | -0.341388938 | 1.91E-13    |
| ABHD11-AS1 | SPX       | -0.515410888 | 0           |
| ABHD11-AS1 | APOD      | -0.14001424  | 0.003309025 |
| ABHD11-AS1 | DPP6      | -0.472881733 | 0           |
| ABHD11-AS1 | MMRN1     | -0.465779665 | 0           |
| ABHD11-AS1 | WDR72     | -0.395220231 | 0           |
| ABHD11-AS1 | MPPED2    | -0.56097323  | 0           |
| ABHD11-AS1 | PAPSS2    | -0.425461183 | 0           |
| ABHD11-AS1 | DCN       | -0.160248584 | 0.000762816 |
| ABHD11-AS1 | SORBS2    | -0.578997609 | 0           |
| ABHD11-AS1 | EGR2      | -0.322369418 | 5.91E-12    |
| ABHD11-AS1 | EDN3      | -0.379427965 | 1.76E-16    |
| ABHD11-AS1 | DIO2      | -0.435863802 | 0           |
| ABHD11-AS1 | ITPR1     | -0.624102384 | 0           |
| ABHD11-AS1 | CFD       | -0.181687124 | 0.000132524 |
| ABHD11-AS1 | CPXM1     | -0.450933288 | 0           |
| ABHD11-AS1 | ELMO1     | -0.598113566 | 0           |
| ABHD11-AS1 | GPC3      | -0.436872918 | 6.92E-22    |
| ABHD11-AS1 | MYOC      | -0.260266472 | 3.14E-08    |
| ABHD11-AS1 | DEPTOR    | -0.500601957 | 0           |
| ABHD11-AS1 | DGKI      | -0.539665747 | 0           |
| ABHD11-AS1 | CARTPT    | -0.462961704 | 1.05E-24    |
| ABHD11-AS1 | IYD       | -0.266761603 | 1.57E-08    |
| ABHD11-AS1 | LYVE1     | -0.389364343 | 0           |

|            |            |              |          |
|------------|------------|--------------|----------|
| ABHD11-AS1 | CLCNKB     | -0.410555661 | 0        |
| ABHD11-AS1 | NCAM1      | -0.364552773 | 3.55E-15 |
| ABHD11-AS1 | HBA2       | -0.26996925  | 1.04E-08 |
| ABHD11-AS1 | GLT8D2     | -0.484740027 | 0        |
| ABHD11-AS1 | OGDHL      | -0.238600266 | 4.59E-07 |
| ABHD11-AS1 | LIFR       | -0.519749402 | 0        |
| ABHD11-AS1 | CSGALNACT1 | -0.404016118 | 0        |
| ABHD11-AS1 | RAP1GAP    | -0.272920739 | 7.09E-09 |
| ABHD11-AS1 | COL9A3     | -0.507908129 | 0        |
| ABHD11-AS1 | FBLN1      | -0.199812633 | 2.57E-05 |
| ABHD11-AS1 | EFEMP1     | -0.37200518  | 6.76E-16 |
| ABHD11-AS1 | AOX1       | -0.433402022 | 1.58E-21 |
| ABHD11-AS1 | GRIN2C     | -0.46778283  | 0        |
| ABHD11-AS1 | C11orf74   | -0.337226999 | 5.29E-13 |
| ABHD11-AS1 | PPARGC1A   | -0.363717069 | 4.21E-15 |
| ABHD11-AS1 | ANGPTL1    | -0.569336372 | 0        |
| ABHD11-AS1 | SCARA5     | -0.267406369 | 1.26E-08 |
| ABHD11-AS1 | LTF        | -0.393861289 | 0        |
| ABHD11-AS1 | CA4        | -0.47490996  | 4.44E-26 |
| ABHD11-AS1 | TG         | -0.493620591 | 0        |
| ABHD11-AS1 | FCGBP      | -0.420075628 | 0        |
| ABHD11-AS1 | PBX4       | -0.417304414 | 0        |
| ABHD11-AS1 | CYR61      | -0.347570188 | 8.88E-14 |
| ABHD11-AS1 | FOS        | -0.394777273 | 0        |
| ABHD11-AS1 | KHDRBS2    | -0.481412669 | 0        |
| ABHD11-AS1 | MUM1L1     | -0.393269119 | 0        |
| ABHD11-AS1 | RGS16      | -0.420737865 | 0        |
| ABHD11-AS1 | MT1M       | -0.316442328 | 1.49E-11 |
| ABHD11-AS1 | LRP2       | -0.460829974 | 0        |
| ABHD11-AS1 | MAFB       | -0.432791043 | 0        |
| ABHD11-AS1 | KCNK2      | -0.422346866 | 0        |
| ABHD11-AS1 | TBC1D4     | -0.577852416 | 0        |
| ABHD11-AS1 | MIOX       | -0.397660694 | 4.39E-18 |
| ABHD11-AS1 | TPPP       | -0.404598927 | 0        |
| ABHD11-AS1 | FMOD       | -0.436412996 | 0        |
| ABHD11-AS1 | CITED2     | -0.362911718 | 4.96E-15 |
| ABHD11-AS1 | RGS8       | -0.507612422 | 3.97E-30 |
| ABHD11-AS1 | ABI3BP     | -0.261368246 | 3.08E-08 |
| ABHD11-AS1 | ADH1B      | -0.263716316 | 2.03E-08 |
| ABHD11-AS1 | OGN        | -0.234962984 | 6.40E-07 |
| ABHD11-AS1 | NR4A1      | -0.368460812 | 1.54E-15 |
| ABHD11-AS1 | FOXJ1      | -0.524177499 | 2.37E-32 |
| ABHD11-AS1 | ALDH1A1    | -0.376958842 | 1.77E-16 |
| ABHD11-AS1 | OCA2       | -0.448211989 | 4.42E-23 |
| ABHD11-AS1 | TMEM139    | -0.256985621 | 5.29E-08 |
| ABHD11-AS1 | ARHGAP24   | -0.51886831  | 0        |
| ABHD11-AS1 | SLC25A15   | -0.480387613 | 0        |
| ABHD11-AS1 | DES        | -0.245981692 | 1.79E-07 |
| ABHD11-AS1 | GDF10      | -0.427557546 | 6.16E-21 |
| ABHD11-AS1 | KIAA1324   | -0.465488189 | 0        |
| ABHD11-AS1 | JUN        | -0.392036271 | 0        |

|            |          |              |             |
|------------|----------|--------------|-------------|
| ABHD11-AS1 | C7       | -0.118251035 | 0.013204898 |
| ABHD11-AS1 | LGI3     | -0.425294525 | 0           |
| ABHD11-AS1 | CDON     | -0.560692108 | 0           |
| ABHD11-AS1 | BCL2     | -0.44662073  | 0           |
| ABHD11-AS1 | HLF      | -0.518835546 | 0           |
| ABHD11-AS1 | EGR1     | -0.365614566 | 2.84E-15    |
| ABHD11-AS1 | IP6K3    | -0.310600624 | 3.62E-11    |
| ABHD11-AS1 | SCUBE3   | -0.442179952 | 0           |
| ABHD11-AS1 | PKNOX2   | -0.578174811 | 0           |
| ABHD11-AS1 | SMAD9    | -0.38675766  | 0           |
| ABHD11-AS1 | IQGAP2   | -0.465323091 | 0           |
| ABHD11-AS1 | GNA14    | -0.569122624 | 0           |
| ABHD11-AS1 | LAYN     | -0.531605142 | 0           |
| ABHD11-AS1 | AVPR1A   | -0.563529418 | 0           |
| ABHD11-AS1 | PDLIM3   | -0.425292397 | 0           |
| ABHD11-AS1 | GPM6A    | -0.284149417 | 1.59E-09    |
| ABHD11-AS1 | SDPR     | -0.47237807  | 0           |
| ABHD11-AS1 | CRYAB    | -0.044851596 | 0.348342599 |
| ABHD11-AS1 | FOXA2    | -0.41300303  | 1.64E-19    |
| ABHD11-AS1 | C8orf88  | -0.4569408   | 0           |
| ABHD11-AS1 | ISM1     | -0.519483458 | 0           |
| ABHD11-AS1 | BMP2     | -0.28366944  | 1.70E-09    |
| ABHD11-AS1 | ID4      | -0.449539171 | 0           |
| ABHD11-AS1 | NUPR1    | -0.059250618 | 0.215258888 |
| ABHD11-AS1 | SERTM1   | -0.318415563 | 8.42E-12    |
| ABHD11-AS1 | IRS1     | -0.573696304 | 0           |
| ABHD11-AS1 | FIBIN    | -0.21074161  | 8.88E-06    |
| ABHD11-AS1 | PODN     | -0.228484867 | 1.40E-06    |
| ABHD11-AS1 | TDRD9    | -0.28814199  | 9.21E-10    |
| ABHD11-AS1 | EPHA3    | -0.436659225 | 0           |
| ABHD11-AS1 | AIF1L    | -0.30728589  | 5.94E-11    |
| ABHD11-AS1 | EBF4     | -0.499753203 | 0           |
| ABHD11-AS1 | ADM2     | -0.336749292 | 5.73E-13    |
| ABHD11-AS1 | GSTM3    | -0.442406182 | 0           |
| ABHD11-AS1 | HSD17B6  | -0.259605069 | 3.83E-08    |
| ABHD11-AS1 | AGR3     | -0.253068906 | 7.66E-08    |
| ABHD11-AS1 | EPHB1    | -0.310905573 | 3.46E-11    |
| ABHD11-AS1 | TMOD1    | -0.390886113 | 0           |
| ABHD11-AS1 | WASF3    | -0.520214202 | 0           |
| ABHD11-AS1 | SELV     | -0.473311708 | 6.84E-26    |
| ABHD11-AS1 | ENPP1    | -0.129239583 | 0.006730324 |
| ABHD11-AS1 | SYNE1    | -0.621868755 | 2.45E-48    |
| ABHD11-AS1 | PLCH1    | -0.505286412 | 0           |
| ABHD11-AS1 | CCDC146  | -0.538784371 | 0           |
| ABHD11-AS1 | SLC16A2  | -0.61798353  | 0           |
| ABHD11-AS1 | IER2     | -0.372331831 | 6.24E-16    |
| ABHD11-AS1 | KCNAB1   | -0.538670617 | 0           |
| ABHD11-AS1 | SYNDIG1  | -0.430626892 | 0           |
| ABHD11-AS1 | C16orf89 | -0.368467194 | 1.53E-15    |
| ABHD11-AS1 | CTGF     | -0.297132195 | 2.61E-10    |
| ABHD11-AS1 | NR4A3    | -0.259221825 | 4.02E-08    |

|            |          |              |             |
|------------|----------|--------------|-------------|
| ABHD11-AS1 | KIAA1456 | -0.309176721 | 4.48E-11    |
| ABHD11-AS1 | AQP4     | -0.37573734  | 2.54E-16    |
| ABHD11-AS1 | RNF150   | -0.604815796 | 0           |
| ABHD11-AS1 | C1S      | -0.133373    | 0.005155454 |
| ABHD11-AS1 | PFKFB2   | -0.308420161 | 5.02E-11    |
| ABHD11-AS1 | PROX1    | -0.554044911 | 0           |
| ABHD11-AS1 | TCF7L1   | -0.627407047 | 0           |
| ABHD11-AS1 | HSPB6    | -0.359373165 | 1.00E-14    |
| ABHD11-AS1 | FHDC1    | -0.283283927 | 1.79E-09    |
| ABHD11-AS1 | PRR15L   | -0.272615505 | 7.38E-09    |
| ABHD11-AS1 | SLC1A1   | -0.331010561 | 1.48E-12    |
| ABHD11-AS1 | BTBD11   | -0.551083494 | 0           |
| ABHD11-AS1 | TRIM58   | -0.489798506 | 0           |
| ABHD11-AS1 | LRIG1    | -0.432050795 | 0           |
| ABHD11-AS1 | ROR2     | -0.401836933 | 0           |
| ABHD11-AS1 | GPR125   | -0.50512415  | 0           |
| ABHD11-AS1 | FLRT1    | -0.572871805 | 0           |
| ABHD11-AS1 | PGF      | -0.45547392  | 0           |
| ABHD11-AS1 | DUSP1    | -0.354857071 | 2.36E-14    |
| ABHD11-AS1 | PLA2G7   | -0.405383003 | 0           |
| ABHD11-AS1 | PLSCR4   | -0.395024779 | 0           |
| ABHD11-AS1 | FAM46B   | -0.160533393 | 0.000746276 |
| ABHD11-AS1 | GLDC     | -0.395258668 | 0           |
| ABHD11-AS1 | ZBTB16   | -0.39374711  | 0           |
| ABHD11-AS1 | OMD      | -0.160303774 | 0.000748997 |
| ABHD11-AS1 | HSD11B2  | -0.49329621  | 0           |
| ABHD11-AS1 | FGL2     | -0.273150089 | 6.88E-09    |
| ABHD11-AS1 | CLCNKA   | -0.442911918 | 1.62E-22    |
| ABHD11-AS1 | GATM     | -0.25318396  | 8.38E-08    |
| ABHD11-AS1 | TNS3     | -0.458512355 | 0           |
| ABHD11-AS1 | TOB1     | -0.465631303 | 0           |
| ABHD11-AS1 | MARC2    | -0.383236411 | 2.38E-18    |
| ABHD11-AS1 | LRRC2    | -0.336273144 | 6.20E-13    |
| ABHD11-AS1 | SORD     | -0.244830888 | 2.25E-07    |
| ABHD11-AS1 | RIMS4    | -0.406185092 | 0           |
| ABHD11-AS1 | SLC29A4  | -0.472588556 | 0           |
| ABHD11-AS1 | SLC39A14 | -0.471203658 | 0           |
| ABHD11-AS1 | FAXDC2   | -0.418829163 | 0           |
| ABHD11-AS1 | HSPB8    | -0.211566251 | 8.18E-06    |
| ABHD11-AS1 | CCL19    | 0.023971736  | 0.616438952 |
| ABHD11-AS1 | KCNIP3   | -0.482351631 | 0           |
| ABHD11-AS1 | CGNL1    | -0.479351067 | 0           |
| ABHD11-AS1 | ATF3     | -0.1562475   | 0.00103404  |
| ABHD11-AS1 | SGCD     | -0.298652122 | 2.10E-10    |
| ABHD11-AS1 | STARD13  | -0.565694137 | 0           |
| ABHD11-AS1 | LDHD     | -0.300362394 | 1.64E-10    |
| ABHD11-AS1 | RCAN1    | -0.377120536 | 1.68E-16    |
| ABHD11-AS1 | ID3      | -0.312812006 | 2.59E-11    |
| ABHD11-AS1 | SYTL3    | -0.391361693 | 0           |
| ABHD11-AS1 | MT1E     | -0.199543994 | 2.63E-05    |
| ABHD11-AS1 | CAMK1D   | -0.558769222 | 0           |

|            |          |              |             |
|------------|----------|--------------|-------------|
| ABHD11-AS1 | PRKCQ    | -0.397363531 | 0           |
| ABHD11-AS1 | NUAK2    | -0.280725043 | 2.53E-09    |
| ABHD11-AS1 | LIPG     | -0.464051521 | 0           |
| ABHD11-AS1 | SLC25A25 | -0.320142858 | 8.38E-12    |
| ABHD11-AS1 | PRKX     | -0.316004335 | 1.59E-11    |
| ABHD11-AS1 | SRPX     | -0.323698006 | 4.79E-12    |
| ABHD11-AS1 | FAM189A1 | -0.527725755 | 0           |
| ABHD11-AS1 | PLEKHH1  | -0.435832456 | 0           |
| ABHD11-AS1 | WNT11    | -0.39804747  | 0           |
| ABHD11-AS1 | SNAI1    | -0.39558149  | 0           |
| ABHD11-AS1 | FDCSP    | -0.033045286 | 0.489823099 |
| ABHD11-AS1 | MT1X     | -0.136591569 | 0.004168269 |
| ABHD11-AS1 | ACACB    | -0.51803601  | 0           |
| ABHD11-AS1 | ARC      | -0.206938105 | 1.29E-05    |
| ABHD11-AS1 | KLK4     | -0.107756069 | 0.023953069 |
| ABHD11-AS1 | ZFPM2    | -0.494267511 | 0           |
| ABHD11-AS1 | AKAP12   | -0.453288068 | 0           |
| ABHD11-AS1 | GJB6     | -0.331332862 | 1.04E-12    |
| ABHD11-AS1 | ERO1LB   | -0.537932213 | 0           |
| ABHD11-AS1 | DNALI1   | -0.472056241 | 0           |
| ABHD11-AS1 | HKDC1    | -0.321442086 | 6.84E-12    |
| ABHD11-AS1 | ZFP36L2  | -0.36984344  | 1.13E-15    |
| ABHD11-AS1 | CAPSL    | -0.5248508   | 1.91E-32    |
| ABHD11-AS1 | CYP7B1   | -0.53970844  | 0           |
| ABHD11-AS1 | CPQ      | -0.531159207 | 0           |
| ABHD11-AS1 | RPS6KA6  | -0.506899189 | 4.92E-30    |
| ABHD11-AS1 | TLE1     | -0.428693793 | 0           |
| ABHD11-AS1 | TP53INP2 | -0.581602022 | 0           |
| ABHD11-AS1 | KATNAL2  | -0.476504537 | 0           |
| ABHD11-AS1 | SGPP2    | -0.321769447 | 6.50E-12    |
| ABHD11-AS1 | CTH      | -0.346012533 | 1.17E-13    |
| ABHD11-AS1 | KIF12    | -0.232336171 | 9.23E-07    |
| ABHD11-AS1 | TMEM220  | -0.429495741 | 0           |
| ABHD11-AS1 | CENPJ    | -0.439511144 | 0           |
| ABHD11-AS1 | FAM155B  | -0.496654346 | 0           |
| ABHD11-AS1 | WFS1     | -0.413576083 | 0           |
| ABHD11-AS1 | SELENBP1 | -0.407521907 | 0           |
| ABHD11-AS1 | SNTA1    | -0.183156699 | 0.000116662 |
| ABHD11-AS1 | FRAS1    | -0.173610067 | 0.000262474 |
| ABHD11-AS1 | FBLN7    | -0.407123486 | 0           |
| ABHD11-AS1 | AGPAT9   | -0.373607939 | 4.53E-16    |
| ABHD11-AS1 | GPR83    | -0.356014745 | 1.90E-14    |
| ABHD11-AS1 | PRTG     | -0.427119969 | 0           |
| ABHD11-AS1 | EGR3     | -0.294103689 | 4.01E-10    |
| ABHD11-AS1 | GRAMD2   | -0.259803783 | 3.74E-08    |
| ABHD11-AS1 | HYOU1    | -0.562507056 | 0           |
| ABHD11-AS1 | FBLN5    | -0.397050355 | 0           |
| ABHD11-AS1 | ITM2A    | -0.536343354 | 0           |
| ABHD11-AS1 | SRF      | -0.40605063  | 0           |
| ABHD11-AS1 | FGFR2    | -0.314209811 | 2.09E-11    |
| ABHD11-AS1 | MT1A     | -0.164103936 | 0.000556476 |

|            |          |              |             |
|------------|----------|--------------|-------------|
| ABHD11-AS1 | MAMDC2   | -0.357997912 | 1.30E-14    |
| ABHD11-AS1 | FHL2     | -0.340660025 | 2.96E-13    |
| ABHD11-AS1 | FTCDNL1  | -0.243122176 | 2.74E-07    |
| ABHD11-AS1 | PKIA     | -0.445489154 | 0           |
| ABHD11-AS1 | DNAJB4   | -0.431220906 | 0           |
| ABHD11-AS1 | SLC25A33 | -0.407134266 | 0           |
| ABHD11-AS1 | EYA2     | -0.225476786 | 1.94E-06    |
| ABHD11-AS1 | LPAR1    | -0.237744988 | 5.05E-07    |
| ABHD11-AS1 | STX11    | -0.156328347 | 0.001027775 |
| ABHD11-AS1 | ARHGEF28 | -0.33204966  | 1.25E-12    |
| ABHD11-AS1 | OR2W3    | -0.474038415 | 0           |
| ABHD11-AS1 | ALDH1B1  | -0.36072602  | 6.16E-15    |
| ABHD11-AS1 | CXCL12   | -0.310600482 | 3.62E-11    |
| ABHD11-AS1 | OLFM2    | -0.499507683 | 0           |
| ABHD11-AS1 | TUB      | -0.352832913 | 3.44E-14    |
| ABHD11-AS1 | HTRA3    | -0.257710834 | 4.84E-08    |
| ABHD11-AS1 | CKB      | -0.225640466 | 1.91E-06    |
| ABHD11-AS1 | RGS2     | -0.124302658 | 0.009167199 |
| ABHD11-AS1 | SHANK2   | -0.554456665 | 0           |
| ABHD11-AS1 | CNTFR    | -0.478987337 | 1.47E-26    |
| ABHD11-AS1 | CYTH3    | -0.54973902  | 0           |
| ABHD11-AS1 | PLAC9    | -0.295185622 | 3.44E-10    |
| ABHD11-AS1 | WVOX     | -0.485948479 | 0           |
| ABHD11-AS1 | NPR3     | -0.518278551 | 0           |
| ABHD11-AS1 | SDC2     | -0.448619499 | 0           |
| ABHD11-AS1 | KLF15    | -0.329221428 | 1.98E-12    |
| ABHD11-AS1 | TMEM164  | -0.573620563 | 0           |
| ABHD11-AS1 | LONRF3   | -0.303269346 | 1.07E-10    |
| ABHD11-AS1 | GBP1     | -0.188740685 | 7.12E-05    |
| ABHD11-AS1 | ARHGAP6  | -0.321448185 | 6.83E-12    |
| ABHD11-AS1 | TMEM119  | -0.199126709 | 2.74E-05    |
| ABHD11-AS1 | SH3RF1   | -0.43115949  | 0           |
| ABHD11-AS1 | CRELD2   | -0.378044463 | 1.24E-16    |
| ABHD11-AS1 | PCP4     | -0.029575453 | 0.5364015   |
| ABHD11-AS1 | GCSH     | -0.442252289 | 0           |
| ABHD11-AS1 | IMPA2    | -0.350426788 | 5.33E-14    |
| ABHD11-AS1 | C1R      | -0.097528062 | 0.041136702 |
| ABHD11-AS1 | SUCNR1   | -0.389027196 | 0           |
| ABHD11-AS1 | SFRP1    | -0.477969999 | 0           |
| ABHD11-AS1 | UGT8     | -0.347660255 | 8.74E-14    |
| ABHD11-AS1 | TLE4     | -0.416562889 | 0           |
| ABHD11-AS1 | ANTXR1   | -0.538303543 | 0           |
| ABHD11-AS1 | GPX3     | -0.229852177 | 1.21E-06    |
| ABHD11-AS1 | DPY19L2  | -0.393454784 | 0           |
| ABHD11-AS1 | FAM46C   | -0.393875331 | 0           |
| ABHD11-AS1 | IL33     | -0.313810125 | 1.73E-11    |
| ABHD11-AS1 | PEG3     | -0.534558333 | 0           |
| ABHD11-AS1 | FAHD2A   | -0.28082518  | 2.49E-09    |
| ABHD11-AS1 | PTGDS    | -0.099342301 | 0.037499831 |
| ABHD11-AS1 | CHCHD10  | -0.063474244 | 0.184276366 |
| ABHD11-AS1 | CD36     | -0.513509845 | 0           |

|            |          |              |             |
|------------|----------|--------------|-------------|
| ABHD11-AS1 | ANKRD37  | -0.359403093 | 9.95E-15    |
| ABHD11-AS1 | TSPAN33  | -0.447653163 | 0           |
| ABHD11-AS1 | PRDM16   | -0.48343243  | 0           |
| ABHD11-AS1 | UST      | -0.479190223 | 0           |
| ABHD11-AS1 | NEXN     | -0.528140487 | 0           |
| ABHD11-AS1 | NUPR1L   | -0.15061279  | 0.001552097 |
| ABHD11-AS1 | SLC24A3  | -0.412328625 | 0           |
| ABHD11-AS1 | MARC1    | -0.508210952 | 0           |
| ABHD11-AS1 | MYH11    | -0.404728708 | 0           |
| ABHD11-AS1 | APOA1    | -0.353688203 | 2.21E-14    |
| ABHD11-AS1 | TMEM178B | -0.562022824 | 0           |
| ABHD11-AS1 | CAPN6    | -0.372826965 | 6.34E-16    |
| ABHD11-AS1 | PPM1L    | -0.593671511 | 0           |
| ABHD11-AS1 | FZD8     | -0.484068995 | 0           |
| ABHD11-AS1 | RCAN2    | -0.588176173 | 0           |
| ABHD11-AS1 | COPZ2    | -0.284418766 | 1.54E-09    |
| ABHD11-AS1 | GAS1     | -0.292414267 | 5.08E-10    |
| ABHD11-AS1 | DACT1    | -0.447365092 | 0           |
| ABHD11-AS1 | WBSCR17  | -0.536849287 | 0           |
| ABHD11-AS1 | NCS1     | -0.313680617 | 2.27E-11    |
| ABHD11-AS1 | SPIRE2   | -0.249517754 | 1.30E-07    |
| ABHD11-AS1 | C15orf52 | -0.274155005 | 6.04E-09    |
| ABHD11-AS1 | SPAG5    | -0.390105442 | 0           |
| ABHD11-AS1 | ARL4D    | -0.315406775 | 1.74E-11    |
| ABHD11-AS1 | FAM189A2 | -0.410044622 | 0           |
| ABHD11-AS1 | MAP1LC3A | -0.368115722 | 1.66E-15    |
| ABHD11-AS1 | KLF6     | -0.135817422 | 0.004388667 |
| ABHD11-AS1 | ADD3     | -0.489614969 | 0           |
| ABHD11-AS1 | TSPAN7   | -0.437705841 | 0           |
| ABHD11-AS1 | KLF9     | -0.442962183 | 0           |
| ABHD11-AS1 | KCNQ1    | -0.381072828 | 3.40E-17    |
| ABHD11-AS1 | MAN1A1   | -0.344262688 | 1.59E-13    |
| ABHD11-AS1 | MLF1     | -0.270407385 | 9.82E-09    |
| ABHD11-AS1 | RARB     | -0.595942182 | 0           |
| ABHD11-AS1 | CDC42EP2 | -0.264520434 | 2.08E-08    |
| ABHD11-AS1 | FAM3B    | -0.147833154 | 0.0019166   |
| ABHD11-AS1 | GADD45B  | -0.160213692 | 0.000764865 |
| ABHD11-AS1 | TMEM47   | -0.543026719 | 0           |
| ABHD11-AS1 | SDF2L1   | -0.299669094 | 1.81E-10    |
| ABHD11-AS1 | CCDC85A  | -0.391543387 | 0           |
| ABHD11-AS1 | CRYBG3   | -0.298871118 | 2.03E-10    |
| ABHD11-AS1 | FBLN2    | -0.160515238 | 0.00074732  |
| ABHD11-AS1 | PEBP4    | -0.0120302   | 0.801465355 |
| ABHD11-AS1 | CDADC1   | -0.502110678 | 0           |
| ABHD11-AS1 | FAM63A   | -0.508823262 | 0           |
| ABHD11-AS1 | GLUL     | -0.383315131 | 1.57E-18    |
| ABHD11-AS1 | FREM2    | -0.266135534 | 1.69E-08    |
| ABHD11-AS1 | ACKR3    | -0.507505879 | 0           |
| ABHD11-AS1 | DENND6A  | -0.580227904 | 0           |
| ABHD11-AS1 | CLDN8    | -0.019768266 | 0.679452939 |
| ABHD11-AS1 | UTS2R    | -0.246104181 | 1.77E-07    |

|            |          |              |             |
|------------|----------|--------------|-------------|
| ABHD11-AS1 | SCNN1B   | -0.185182559 | 9.77E-05    |
| ABHD11-AS1 | TTC30A   | -0.498320365 | 0           |
| ABHD11-AS1 | CORO2B   | -0.608814327 | 0           |
| ABHD11-AS1 | TC2N     | -0.293384858 | 4.44E-10    |
| ABHD11-AS1 | ALDH2    | -0.407848983 | 0           |
| ABHD11-AS1 | GPR183   | -0.111617738 | 0.019361569 |
| ABHD11-AS1 | C4orf47  | -0.373699708 | 4.42E-16    |
| ABHD11-AS1 | SLC25A42 | -0.506524366 | 0           |
| ABHD11-AS1 | LGMN     | -0.414071094 | 0           |
| ABHD11-AS1 | ACSF2    | -0.318099411 | 1.15E-11    |
| ABHD11-AS1 | KIAA1467 | -0.487029136 | 0           |
| ABHD11-AS1 | PRKG1    | -0.60577348  | 0           |
| ABHD11-AS1 | GNAI1    | -0.501012859 | 0           |
| ABHD11-AS1 | ABCC4    | -0.440922282 | 0           |
| ABHD11-AS1 | PRPS1    | -0.49165714  | 0           |
| ABHD11-AS1 | TSPAN5   | -0.274927167 | 5.46E-09    |
| ABHD11-AS1 | CR2      | -0.17933237  | 0.000158485 |
| ABHD11-AS1 | CCDC170  | -0.4162456   | 0           |
| ABHD11-AS1 | RRAD     | -0.034833497 | 0.466473875 |
| ABHD11-AS1 | SCGB2A1  | -0.189855383 | 6.44E-05    |
| ABHD11-AS1 | SESN3    | -0.414822831 | 0           |
| ABHD11-AS1 | SGK223   | -0.272383034 | 7.61E-09    |
| ABHD11-AS1 | NDRG2    | -0.53236     | 0           |
| ABHD11-AS1 | C3orf52  | -0.255525691 | 6.32E-08    |
| ABHD11-AS1 | FLRT3    | 0.114804534  | 0.016146154 |
| ABHD11-AS1 | MST1R    | 0.429076186  | 0           |
| ABHD11-AS1 | SDC1     | 0.347033193  | 9.77E-14    |
| ABHD11-AS1 | ST8SIA4  | 0.290583717  | 6.57E-10    |
| ABHD11-AS1 | UBTD1    | 0.433258538  | 0           |
| ABHD11-AS1 | EPHA2    | 0.216238508  | 5.09E-06    |
| ABHD11-AS1 | TMEM130  | 0.109651591  | 0.021612445 |
| ABHD11-AS1 | SPINK2   | 0.460143057  | 0           |
| ABHD11-AS1 | MMP16    | 0.315246641  | 1.79E-11    |
| ABHD11-AS1 | SIGLEC15 | 0.348080376  | 8.11E-14    |
| ABHD11-AS1 | RIN1     | 0.380054295  | 5.69E-17    |
| ABHD11-AS1 | IL1RN    | 0.508897018  | 0           |
| ABHD11-AS1 | FCER1G   | 0.186256266  | 8.89E-05    |
| ABHD11-AS1 | CD276    | 0.336810991  | 5.67E-13    |
| ABHD11-AS1 | CTSB     | 0.4818474    | 0           |
| ABHD11-AS1 | FAM171A2 | -0.021702499 | 0.650082589 |
| ABHD11-AS1 | ASPHD1   | 0.475711242  | 0           |
| ABHD11-AS1 | C15orf48 | 0.473238879  | 0           |
| ABHD11-AS1 | DYSF     | -0.134140765 | 0.00490252  |
| ABHD11-AS1 | PDZRN4   | -0.05203976  | 0.276484029 |
| ABHD11-AS1 | EFHD2    | 0.091679125  | 0.054949968 |
| ABHD11-AS1 | ASF1B    | 0.30147      | 1.40E-10    |
| ABHD11-AS1 | AQP1     | -0.014053932 | 0.768946149 |
| ABHD11-AS1 | ARRDC2   | 0.435320992  | 0           |
| ABHD11-AS1 | PRSS1    | 0.312873721  | 2.00E-11    |
| ABHD11-AS1 | MAPK13   | 0.334337918  | 8.56E-13    |
| ABHD11-AS1 | CST5     | 0.510021623  | 1.92E-30    |



|            |          |              |             |
|------------|----------|--------------|-------------|
| ABHD11-AS1 | AHR      | 0.260626296  | 3.38E-08    |
| ABHD11-AS1 | BAX      | 0.435636154  | 0           |
| ABHD11-AS1 | C1orf115 | 0.23584281   | 6.26E-07    |
| ABHD11-AS1 | PLK3     | 0.279170083  | 3.11E-09    |
| ABHD11-AS1 | JAG2     | 0.117237183  | 0.014016712 |
| ABHD11-AS1 | RAD23B   | 0.360467438  | 8.08E-15    |
| ABHD11-AS1 | CA12     | -0.206906192 | 1.30E-05    |
| ABHD11-AS1 | ADTRP    | 0.278153252  | 3.56E-09    |
| ABHD11-AS1 | UCP2     | 0.301592122  | 1.37E-10    |
| ABHD11-AS1 | IGFBP2   | 0.271815969  | 8.19E-09    |
| ABHD11-AS1 | LOXL2    | 0.028192399  | 0.555631531 |
| ABHD11-AS1 | GPX1     | 0.421152597  | 0           |
| ABHD11-AS1 | P3H3     | 0.414425687  | 0           |
| ABHD11-AS1 | C2orf81  | 0.25938125   | 3.94E-08    |
| ABHD11-AS1 | CDT1     | 0.438368362  | 0           |
| ABHD11-AS1 | SNX25    | 0.079921252  | 0.094429768 |
| ABHD11-AS1 | MTHFD1L  | 0.401182354  | 0           |
| ABHD11-AS1 | CDC42BPG | 0.44627133   | 7.13E-23    |
| ABHD11-AS1 | MSN      | 0.349722283  | 6.05E-14    |
| ABHD11-AS1 | SIGLEC6  | 0.322231313  | 4.59E-12    |
| ABHD11-AS1 | F2R      | -0.068347484 | 0.152770955 |
| ABHD11-AS1 | TMEM184A | 0.507827566  | 0           |
| ABHD11-AS1 | CKS2     | 0.347270628  | 9.37E-14    |
| ABHD11-AS1 | TAX1BP3  | 0.506395153  | 0           |
| ABHD11-AS1 | PMEP1    | 0.281538195  | 2.27E-09    |
| ABHD11-AS1 | CXCL16   | 0.399905395  | 0           |
| ABHD11-AS1 | FAXC     | 0.399776039  | 0           |
| ABHD11-AS1 | VTCN1    | 0.462527213  | 1.18E-24    |
| ABHD11-AS1 | SH2D4A   | 0.321060403  | 7.26E-12    |
| ABHD11-AS1 | RNF24    | 0.2230135    | 2.52E-06    |
| ABHD11-AS1 | LY6G6C   | 0.520239067  | 8.21E-32    |
| ABHD11-AS1 | NID1     | 0.008903259  | 0.852374058 |
| ABHD11-AS1 | STAC     | 0.469781174  | 0           |
| ABHD11-AS1 | RAB34    | 0.456836266  | 0           |
| ABHD11-AS1 | HES4     | 0.340642863  | 2.96E-13    |
| ABHD11-AS1 | EPHA10   | 0.468902493  | 0           |
| ABHD11-AS1 | ENTPD2   | 0.31658998   | 1.45E-11    |
| ABHD11-AS1 | DDB2     | 0.449164154  | 0           |
| ABHD11-AS1 | NKAIN4   | 0.188060434  | 7.57E-05    |
| ABHD11-AS1 | TRIM29   | 0.362458123  | 5.44E-15    |
| ABHD11-AS1 | ADCY8    | 0.395802943  | 6.46E-18    |
| ABHD11-AS1 | SFTA2    | 0.549385987  | 0           |
| ABHD11-AS1 | NRIP1    | 0.147328356  | 0.00198695  |
| ABHD11-AS1 | VWA1     | -0.022993785 | 0.630769146 |
| ABHD11-AS1 | APLNR    | 0.000679684  | 0.98866665  |
| ABHD11-AS1 | REN      | 0.400240698  | 2.55E-18    |
| ABHD11-AS1 | EDIL3    | 0.033316975  | 0.486109411 |
| ABHD11-AS1 | AGR1     | 0.202221453  | 2.04E-05    |
| ABHD11-AS1 | TREM1    | 0.258612492  | 4.33E-08    |
| ABHD11-AS1 | SRL      | 0.12943858   | 0.006645594 |
| ABHD11-AS1 | RASGRF1  | 0.270598014  | 9.58E-09    |

|            |          |              |             |
|------------|----------|--------------|-------------|
| ABHD11-AS1 | RMI2     | 0.394121276  | 0           |
| ABHD11-AS1 | SAMD1    | 0.46582406   | 0           |
| ABHD11-AS1 | MGAT4B   | 0.522591251  | 0           |
| ABHD11-AS1 | NXN      | 0.356459263  | 1.75E-14    |
| ABHD11-AS1 | SH3BGRL3 | 0.462310186  | 0           |
| ABHD11-AS1 | CA11     | 0.282585521  | 1.97E-09    |
| ABHD11-AS1 | PLD3     | 0.134816335  | 0.004689278 |
| ABHD11-AS1 | LURAP1L  | 0.458402432  | 0           |
| ABHD11-AS1 | CARNS1   | 0.182904512  | 0.00011925  |
| ABHD11-AS1 | PDLIM7   | 0.261619156  | 2.99E-08    |
| ABHD11-AS1 | BCL2L1   | 0.494868049  | 0           |
| ABHD11-AS1 | GGT6     | 0.369512109  | 1.21E-15    |
| ABHD11-AS1 | DPYSL3   | 0.121126783  | 0.011123393 |
| ABHD11-AS1 | FYN      | 0.273578721  | 6.51E-09    |
| ABHD11-AS1 | TK1      | 0.308384135  | 5.04E-11    |
| ABHD11-AS1 | AK1      | 0.298437097  | 2.16E-10    |
| ABHD11-AS1 | HIGD1B   | -0.005111385 | 0.914921345 |
| ABHD11-AS1 | TMEM59L  | 0.185148943  | 9.80E-05    |
| ABHD11-AS1 | MEGF9    | 0.265205933  | 1.91E-08    |
| ABHD11-AS1 | ZFP36L1  | 0.250752446  | 1.12E-07    |
| ABHD11-AS1 | ADRA1B   | 0.101845017  | 0.032933406 |
| ABHD11-AS1 | EPHA4    | 0.258326974  | 4.49E-08    |
| ABHD11-AS1 | TCERG1L  | 0.058348959  | 0.222331858 |
| ABHD11-AS1 | NGFR     | 0.136965593  | 0.004065416 |
| ABHD11-AS1 | EBI3     | 0.434457062  | 0           |
| ABHD11-AS1 | S100A10  | 0.356179986  | 1.84E-14    |
| ABHD11-AS1 | S100B    | 0.322405586  | 5.88E-12    |
| ABHD11-AS1 | CD44     | 0.048393978  | 0.311566361 |
| ABHD11-AS1 | BHLHE41  | 0.308360732  | 5.06E-11    |
| ABHD11-AS1 | FBXO2    | 0.325460616  | 3.62E-12    |
| ABHD11-AS1 | SLC30A2  | 0.50139199   | 0           |
| ABHD11-AS1 | FRMD5    | 0.500428348  | 0           |
| ABHD11-AS1 | SAMD11   | 0.26683706   | 1.55E-08    |
| ABHD11-AS1 | SIPA1L2  | 0.149760153  | 0.001668517 |
| ABHD11-AS1 | S100A16  | 0.521332305  | 0           |
| ABHD11-AS1 | PPL      | 0.443757606  | 0           |
| ABHD11-AS1 | ARHGDIB  | 0.086208183  | 0.071168058 |
| ABHD11-AS1 | CDC42EP3 | 0.436706031  | 0           |
| ABHD11-AS1 | RUNX2    | 0.184354088  | 0.000105076 |
| ABHD11-AS1 | LAMC2    | 0.398810979  | 0           |
| ABHD11-AS1 | BRINP1   | 0.350946763  | 4.85E-14    |
| ABHD11-AS1 | GPRC5B   | 0.328547559  | 2.21E-12    |
| ABHD11-AS1 | AQP5     | 0.020248243  | 0.672117146 |
| ABHD11-AS1 | PLAG1    | 0.159353166  | 0.000817053 |
| ABHD11-AS1 | PTPRU    | 0.417746662  | 0           |
| ABHD11-AS1 | ANGPTL4  | 0.352886953  | 3.40E-14    |
| ABHD11-AS1 | PALM3    | 0.349605693  | 6.18E-14    |
| ABHD11-AS1 | ACP5     | 0.305074933  | 8.23E-11    |
| ABHD11-AS1 | DLG4     | 0.129513612  | 0.006613896 |
| ABHD11-AS1 | ETNK2    | 0.372613945  | 5.82E-16    |
| ABHD11-AS1 | CD109    | 0.230859079  | 1.08E-06    |

|            |          |              |             |
|------------|----------|--------------|-------------|
| ABHD11-AS1 | SNX22    | 0.198843176  | 2.81E-05    |
| ABHD11-AS1 | TMEM98   | 0.404016544  | 0           |
| ABHD11-AS1 | CTHRC1   | 0.218370745  | 4.09E-06    |
| ABHD11-AS1 | S100A2   | 0.477478249  | 0           |
| ABHD11-AS1 | C11orf80 | 0.537191398  | 0           |
| ABHD11-AS1 | SREBF1   | 0.313745578  | 2.25E-11    |
| ABHD11-AS1 | PRSS22   | 0.523369511  | 0           |
| ABHD11-AS1 | CMTM3    | 0.33871714   | 4.11E-13    |
| ABHD11-AS1 | RDH5     | 0.379079307  | 8.53E-17    |
| ABHD11-AS1 | MYH10    | 0.164598729  | 0.000543656 |
| ABHD11-AS1 | EVPL     | 0.367585109  | 1.86E-15    |
| ABHD11-AS1 | SCD      | 0.259494719  | 3.89E-08    |
| ABHD11-AS1 | CD151    | 0.376738852  | 1.89E-16    |
| ABHD11-AS1 | S100A4   | 0.394329493  | 0           |
| ABHD11-AS1 | BNIPL    | 0.31856719   | 1.07E-11    |
| ABHD11-AS1 | MAP3K6   | 0.469215244  | 0           |
| ABHD11-AS1 | MANEAL   | 0.429780124  | 0           |
| ABHD11-AS1 | CD207    | 0.332868154  | 8.09E-13    |
| ABHD11-AS1 | CD1A     | 0.357964489  | 1.02E-14    |
| ABHD11-AS1 | C3       | 0.167422422  | 0.000434419 |
| ABHD11-AS1 | NT5E     | 0.274040401  | 6.13E-09    |
| ABHD11-AS1 | CACNG4   | 0.381152527  | 1.25E-16    |
| ABHD11-AS1 | FHOD1    | 0.455615332  | 0           |
| ABHD11-AS1 | LEMD1    | 0.387961857  | 0           |
| ABHD11-AS1 | ATP11A   | 0.008564551  | 0.857929483 |
| ABHD11-AS1 | PPAP2C   | 0.272396225  | 7.59E-09    |
| ABHD11-AS1 | DRAM1    | 0.352082169  | 3.94E-14    |
| ABHD11-AS1 | CDA      | 0.118441238  | 0.013057303 |
| ABHD11-AS1 | CCND2    | 0.072615221  | 0.128695475 |
| ABHD11-AS1 | LCN6     | 0.155259681  | 0.001100109 |
| ABHD11-AS1 | CDH4     | 0.372671247  | 5.74E-16    |
| ABHD11-AS1 | MMP11    | 0.35506004   | 2.28E-14    |
| ABHD11-AS1 | B3GAT1   | 0.275991087  | 4.74E-09    |
| ABHD11-AS1 | SPP1     | 0.267099743  | 1.50E-08    |
| ABHD11-AS1 | HLA-DQB1 | 0.319328571  | 9.52E-12    |
| ABHD11-AS1 | SDC3     | 0.202537041  | 1.98E-05    |
| ABHD11-AS1 | CX3CL1   | 0.229948343  | 1.20E-06    |
| ABHD11-AS1 | SDK1     | 0.155351515  | 0.001105881 |
| ABHD11-AS1 | DOCK9    | 0.255262441  | 6.52E-08    |
| ABHD11-AS1 | CSF2     | 0.44077835   | 2.72E-22    |
| ABHD11-AS1 | GRHL3    | 0.418235433  | 0           |
| ABHD11-AS1 | TMEM92   | 0.463506378  | 9.13E-25    |
| ABHD11-AS1 | BASP1    | 0.454904302  | 0           |
| ABHD11-AS1 | HRH1     | 0.303356434  | 1.06E-10    |
| ABHD11-AS1 | ESM1     | -0.085379712 | 0.073935138 |
| ABHD11-AS1 | B4GALNT3 | 0.401992244  | 0           |
| ABHD11-AS1 | LMO3     | 0.235271349  | 6.67E-07    |
| ABHD11-AS1 | C9orf16  | 0.559601523  | 0           |
| ABHD11-AS1 | SEMA3F   | 0.001993805  | 0.966760598 |
| ABHD11-AS1 | PLA2G12B | 0.22945228   | 1.18E-06    |
| ABHD11-AS1 | KLK6     | 0.381655785  | 1.14E-16    |

|            |          |              |             |
|------------|----------|--------------|-------------|
| ABHD11-AS1 | ST3GAL5  | 0.277389176  | 3.94E-09    |
| ABHD11-AS1 | FAM132B  | 0.220272923  | 3.36E-06    |
| ABHD11-AS1 | CDKN1A   | 0.206793573  | 1.31E-05    |
| ABHD11-AS1 | E2F1     | 0.443099482  | 0           |
| ABHD11-AS1 | B3GNT8   | 0.28802228   | 9.37E-10    |
| ABHD11-AS1 | MTMR11   | 0.3238597    | 4.67E-12    |
| ABHD11-AS1 | MYO1G    | 0.311453348  | 3.18E-11    |
| ABHD11-AS1 | TMSB10   | 0.450306368  | 0           |
| ABHD11-AS1 | UNC5CL   | 0.492227042  | 0           |
| ABHD11-AS1 | ABR      | 0.2690683    | 1.17E-08    |
| ABHD11-AS1 | PLP2     | 0.415875121  | 0           |
| ABHD11-AS1 | SRCIN1   | 0.425107016  | 0           |
| ABHD11-AS1 | PDE9A    | 0.577511865  | 0           |
| ABHD11-AS1 | TREM2    | 0.27125784   | 8.80E-09    |
| ABHD11-AS1 | KDELR3   | 0.218111041  | 4.20E-06    |
| ABHD11-AS1 | PC       | 0.422896343  | 0           |
| ABHD11-AS1 | C2CD4A   | 0.532159584  | 0           |
| ABHD11-AS1 | PELI1    | 0.245738503  | 2.02E-07    |
| ABHD11-AS1 | SSX1     | 0.235980818  | 6.16E-07    |
| ABHD11-AS1 | MROH6    | 0.460382194  | 0           |
| ABHD11-AS1 | ESPN     | 0.356833146  | 1.63E-14    |
| ABHD11-AS1 | BMP1     | 0.196752072  | 3.42E-05    |
| ABHD11-AS1 | TM4SF4   | 0.310667224  | 2.81E-11    |
| ABHD11-AS1 | CORO2A   | 0.289146197  | 8.02E-10    |
| ABHD11-AS1 | CD164L2  | 0.499223034  | 4.78E-29    |
| ABHD11-AS1 | CTSS     | 0.330911275  | 1.50E-12    |
| ABHD11-AS1 | CLU      | 0.324517825  | 4.21E-12    |
| ABHD11-AS1 | TMSB4X   | 0.35961826   | 9.54E-15    |
| ABHD11-AS1 | WNT10A   | 0.413122573  | 1.59E-19    |
| ABHD11-AS1 | NAPSA    | 0.323880409  | 4.66E-12    |
| ABHD11-AS1 | PLEKHA4  | 0.392844175  | 0           |
| ABHD11-AS1 | SFTPA1   | -0.018998079 | 0.691400727 |
| ABHD11-AS1 | C1orf116 | 0.421879087  | 0           |
| ABHD11-AS1 | TM4SF1   | 0.356821515  | 1.63E-14    |
| ABHD11-AS1 | SEL1L3   | 0.286321653  | 1.18E-09    |
| ABHD11-AS1 | VASN     | 0.47894754   | 0           |
| ABHD11-AS1 | NPTXR    | 0.466001214  | 0           |
| ABHD11-AS1 | PDE4C    | 0.53560651   | 0           |
| ABHD11-AS1 | CDC42EP1 | 0.425578199  | 0           |
| ABHD11-AS1 | ENDOD1   | 0.404778918  | 0           |
| ABHD11-AS1 | RYR1     | 0.325506288  | 3.60E-12    |
| ABHD11-AS1 | IL1RAP   | 0.226748781  | 1.69E-06    |
| ABHD11-AS1 | SLC35F2  | 0.407472136  | 5.46E-19    |
| ABHD11-AS1 | ISYNA1   | 0.255725398  | 6.17E-08    |
| ABHD11-AS1 | HLA-G    | 0.409641663  | 0           |
| ABHD11-AS1 | CDKN2B   | 0.350914991  | 4.88E-14    |
| ABHD11-AS1 | ALDH1A3  | 0.278048009  | 3.61E-09    |
| ABHD11-AS1 | CLIP3    | 0.140883277  | 0.003118173 |
| ABHD11-AS1 | ULBP2    | 0.307115402  | 6.09E-11    |
| ABHD11-AS1 | ETHE1    | 0.573740557  | 0           |
| ABHD11-AS1 | XPR1     | 0.150239705  | 0.00161154  |

|            |          |              |             |
|------------|----------|--------------|-------------|
| ABHD11-AS1 | SPTBN2   | 0.474826888  | 0           |
| ABHD11-AS1 | IVL      | 0.386634215  | 4.21E-17    |
| ABHD11-AS1 | MARCO    | 0.401594533  | 0           |
| ABHD11-AS1 | PLXND1   | 0.011301866  | 0.813256622 |
| ABHD11-AS1 | EMILIN2  | 0.268202668  | 1.30E-08    |
| ABHD11-AS1 | PLAUR    | 0.349977306  | 5.78E-14    |
| ABHD11-AS1 | CDC42EP5 | 0.464005282  | 0           |
| ABHD11-AS1 | TRPC5    | 0.104375007  | 0.028768836 |
| ABHD11-AS1 | TMEM100  | 0.167421287  | 0.000434459 |
| ABHD11-AS1 | QSOX1    | 0.368032464  | 1.69E-15    |
| ABHD11-AS1 | ARHGAP23 | 0.201036688  | 2.29E-05    |
| ABHD11-AS1 | MDFI     | 0.154488011  | 0.001179446 |
| ABHD11-AS1 | FSTL3    | 0.512795553  | 0           |
| ABHD11-AS1 | INF2     | 0.432837282  | 0           |
| ABHD11-AS1 | TGFBR1   | 0.376951892  | 1.77E-16    |
| ABHD11-AS1 | TGFBI    | 0.127266486  | 0.007624319 |
| ABHD11-AS1 | ERBB3    | 0.539504052  | 0           |
| ABHD11-AS1 | CCL18    | 0.24132822   | 3.37E-07    |
| ABHD11-AS1 | CCL17    | 0.37412885   | 4.94E-16    |
| ABHD11-AS1 | C16orf45 | 0.161548663  | 0.00068998  |
| ABHD11-AS1 | PRDM1    | 0.085394321  | 0.073885594 |
| ABHD11-AS1 | TRIM47   | 0.547295875  | 0           |
| ABHD11-AS1 | CNFN     | 0.539284347  | 0           |
| ABHD11-AS1 | ARMCX3   | 0.288534595  | 8.73E-10    |
| ABHD11-AS1 | RAMP1    | 0.287644567  | 9.87E-10    |
| ABHD11-AS1 | GABRD    | -0.005283291 | 0.912071324 |
| ABHD11-AS1 | COL13A1  | 0.180921062  | 0.000141576 |
| ABHD11-AS1 | S100A5   | 0.4879976    | 0           |
| ABHD11-AS1 | MISP     | 0.391753589  | 0           |
| ABHD11-AS1 | HES6     | 0.346301597  | 1.11E-13    |
| ABHD11-AS1 | PSD3     | 0.199730084  | 2.59E-05    |
| ABHD11-AS1 | DOK7     | 0.483228185  | 0           |
| ABHD11-AS1 | ZMAT3    | 0.273149947  | 6.88E-09    |
| ABHD11-AS1 | MFAP2    | 0.200267647  | 2.46E-05    |
| ABHD11-AS1 | TMEM79   | 0.413722601  | 0           |
| ABHD11-AS1 | SLC1A5   | 0.342863323  | 2.02E-13    |
| ABHD11-AS1 | BBC3     | 0.455532074  | 0           |
| ABHD11-AS1 | HLA-DQB2 | 0.356968458  | 1.59E-14    |
| ABHD11-AS1 | C1QL1    | 0.298145621  | 2.25E-10    |
| ABHD11-AS1 | TMEM215  | 0.061928735  | 0.195287468 |
| ABHD11-AS1 | PNP      | 0.356392741  | 1.77E-14    |
| ABHD11-AS1 | ARNTL    | 0.272874216  | 7.13E-09    |
| ABHD11-AS1 | CLDN2    | 0.269395883  | 9.77E-09    |
| ABHD11-AS1 | MVP      | 0.471702925  | 0           |
| ABHD11-AS1 | LGALS1   | 0.35899914   | 1.08E-14    |
| ABHD11-AS1 | BIRC7    | 0.414868513  | 1.08E-19    |
| ABHD11-AS1 | COL8A1   | 0.278693652  | 3.32E-09    |
| ABHD11-AS1 | PERP     | 0.547467498  | 0           |
| ABHD11-AS1 | GJA4     | 0.131347141  | 0.005880267 |
| ABHD11-AS1 | IGFL2    | 0.369144368  | 1.28E-15    |
| ABHD11-AS1 | DAPK2    | 0.475514514  | 0           |

|            |           |              |             |
|------------|-----------|--------------|-------------|
| ABHD11-AS1 | MAMLD1    | 0.316186879  | 1.55E-11    |
| ABHD11-AS1 | ETV5      | 0.080325204  | 0.092771886 |
| ABHD11-AS1 | RUNX1     | 0.411878009  | 0           |
| ABHD11-AS1 | LONRF2    | 0.165880936  | 0.000491222 |
| ABHD11-AS1 | SPOCK1    | -0.025375939 | 0.595799243 |
| ABHD11-AS1 | XKRX      | 0.285835435  | 1.27E-09    |
| ABHD11-AS1 | TGFB1     | 0.0561641    | 0.24015505  |
| ABHD11-AS1 | ERP27     | 0.229409504  | 1.27E-06    |
| ABHD11-AS1 | TNFRSF10C | 0.27447272   | 5.79E-09    |
| ABHD11-AS1 | PALM      | 0.465084237  | 0           |
| ABHD11-AS1 | TSC22D1   | 0.139213002  | 0.003494325 |
| ABHD11-AS1 | TGM2      | 0.292676523  | 4.90E-10    |
| ABHD11-AS1 | UBE2QL1   | 0.281523302  | 2.27E-09    |
| ABHD11-AS1 | ECE1      | 0.268676121  | 1.23E-08    |
| ABHD11-AS1 | COL8A2    | 0.322657914  | 5.65E-12    |
| ABHD11-AS1 | HIST3H2A  | 0.478423877  | 0           |
| ABHD11-AS1 | TNFRSF21  | 0.314288673  | 2.07E-11    |
| ABHD11-AS1 | SOX4      | 0.343067285  | 1.95E-13    |
| ABHD11-AS1 | ELF3      | 0.52452747   | 0           |
| ABHD11-AS1 | TPD52L1   | 0.485790189  | 0           |
| ABHD11-AS1 | INHBB     | 0.220214486  | 3.38E-06    |
| ABHD11-AS1 | HPN       | 0.436661778  | 0           |
| ABHD11-AS1 | MMP7      | 0.376369263  | 3.20E-16    |
| ABHD11-AS1 | RAB27A    | 0.29846518   | 2.15E-10    |
| ABHD11-AS1 | IGF2BP2   | 0.254774238  | 6.92E-08    |
| ABHD11-AS1 | ITGB4     | 0.297968467  | 2.31E-10    |
| ABHD11-AS1 | PPP1R1B   | 0.335744517  | 6.77E-13    |
| ABHD11-AS1 | NPDC1     | 0.280868157  | 2.48E-09    |
| ABHD11-AS1 | CCL13     | 0.362017918  | 4.85E-15    |
| ABHD11-AS1 | SPINT1    | 0.599548958  | 0           |
| ABHD11-AS1 | HEY2      | 0.199011395  | 2.77E-05    |
| ABHD11-AS1 | CST2      | 0.468001566  | 2.81E-25    |
| ABHD11-AS1 | ADM       | 0.310656366  | 3.59E-11    |
| ABHD11-AS1 | VSTM2L    | 0.460113413  | 0           |
| ABHD11-AS1 | FAM84A    | 0.283559516  | 1.73E-09    |
| ABHD11-AS1 | P4HA2     | 0.312013747  | 2.92E-11    |
| ABHD11-AS1 | LPL       | 0.079580276  | 0.095847547 |
| ABHD11-AS1 | TMEM173   | 0.276870335  | 4.22E-09    |
| ABHD11-AS1 | DHRS3     | 0.480910566  | 0           |
| ABHD11-AS1 | SCN1B     | 0.443584707  | 0           |
| ABHD11-AS1 | GLT1D1    | 0.141365381  | 0.003016667 |
| ABHD11-AS1 | PHYHIP    | 0.367841976  | 1.76E-15    |
| ABHD11-AS1 | BHLHE40   | 0.347565366  | 8.89E-14    |
| ABHD11-AS1 | BID       | 0.503485931  | 0           |
| ABHD11-AS1 | POSTN     | 0.219398213  | 3.68E-06    |
| ABHD11-AS1 | ITGA3     | 0.521516693  | 0           |
| ABHD11-AS1 | RSPO4     | 0.384262177  | 0           |
| ABHD11-AS1 | ADAMTS9   | -0.000347217 | 0.994210777 |
| ABHD11-AS1 | ABTB2     | 0.402282018  | 0           |
| ABHD11-AS1 | KCNQ3     | 0.415819663  | 0           |
| ABHD11-AS1 | ANXA1     | 0.352191384  | 3.87E-14    |

|            |            |              |             |
|------------|------------|--------------|-------------|
| ABHD11-AS1 | S100A11    | 0.515820797  | 0           |
| ABHD11-AS1 | CEACAM6    | 0.468637975  | 2.38E-25    |
| ABHD11-AS1 | IER5L      | 0.434518619  | 0           |
| ABHD11-AS1 | KRT80      | 0.499579453  | 0           |
| ABHD11-AS1 | CDH6       | 0.298533546  | 2.13E-10    |
| ABHD11-AS1 | UNC5B      | 0.195057969  | 4.01E-05    |
| ABHD11-AS1 | PLEKHN1    | 0.493365001  | 0           |
| ABHD11-AS1 | SYTL1      | 0.401328305  | 0           |
| ABHD11-AS1 | TMEM163    | 0.365752574  | 2.76E-15    |
| ABHD11-AS1 | C4orf48    | 0.19521172   | 3.95E-05    |
| ABHD11-AS1 | B3GNT7     | 0.219864432  | 3.50E-06    |
| ABHD11-AS1 | BAIAP3     | 0.338557999  | 4.22E-13    |
| ABHD11-AS1 | PHLDA2     | 0.444159431  | 0           |
| ABHD11-AS1 | GAP43      | 0.327562623  | 1.94E-12    |
| ABHD11-AS1 | S100A1     | 0.550060706  | 0           |
| ABHD11-AS1 | PTPRE      | 0.391607497  | 0           |
| ABHD11-AS1 | CCND1      | 0.251673111  | 1.00E-07    |
| ABHD11-AS1 | ST6GALNAC5 | 0.486329657  | 1.92E-27    |
| ABHD11-AS1 | KRT17      | 0.190704845  | 5.97E-05    |
| ABHD11-AS1 | HPCAL4     | 0.257087885  | 5.22E-08    |
| ABHD11-AS1 | GABBR2     | 0.207189015  | 1.26E-05    |
| ABHD11-AS1 | DIRAS3     | 0.234527555  | 7.24E-07    |
| ABHD11-AS1 | SERINC2    | 0.478706701  | 0           |
| ABHD11-AS1 | PTCHD4     | 0.199090966  | 2.75E-05    |
| ABHD11-AS1 | EPS8       | 0.174346769  | 0.000246911 |
| ABHD11-AS1 | LY6E       | 0.421808168  | 0           |
| ABHD11-AS1 | UPP1       | 0.562248345  | 0           |
| ABHD11-AS1 | AHNAK2     | 0.451839628  | 0           |
| ABHD11-AS1 | PLXNC1     | 0.270047686  | 1.03E-08    |
| ABHD11-AS1 | TNC        | 0.262429755  | 2.70E-08    |
| ABHD11-AS1 | DUSP4      | 0.193602294  | 4.58E-05    |
| ABHD11-AS1 | NRCAM      | 0.220058323  | 3.43E-06    |
| ABHD11-AS1 | NRP2       | 0.193625981  | 4.57E-05    |
| ABHD11-AS1 | CTSC       | 0.411063154  | 0           |
| ABHD11-AS1 | AMIGO2     | 0.146947665  | 0.002041559 |
| ABHD11-AS1 | NAB2       | 0.395154418  | 0           |
| ABHD11-AS1 | TBC1D2     | 0.528615641  | 0           |
| ABHD11-AS1 | PHLDA3     | 0.517759144  | 0           |
| ABHD11-AS1 | PTP4A3     | 0.340921005  | 2.83E-13    |
| ABHD11-AS1 | CRABP2     | 0.347965205  | 8.28E-14    |
| ABHD11-AS1 | GOS2       | 0.240876327  | 3.54E-07    |
| ABHD11-AS1 | S100A6     | 0.653406219  | 0           |
| ABHD11-AS1 | FOXQ1      | 0.400110207  | 0           |
| ABHD11-AS1 | LRG1       | 0.363171422  | 4.71E-15    |
| ABHD11-AS1 | LAMP5      | 0.259869311  | 3.71E-08    |
| ABHD11-AS1 | ALDH3B1    | 0.534266149  | 0           |
| ABHD11-AS1 | CDH2       | -0.157529566 | 0.000938714 |
| ABHD11-AS1 | SCG5       | 0.091214041  | 0.056197082 |
| ABHD11-AS1 | ZCCHC16    | 0.144884024  | 0.002341748 |
| ABHD11-AS1 | GRB7       | 0.491860676  | 0           |
| ABHD11-AS1 | TIAM1      | 0.092282074  | 0.053367511 |

|            |         |             |             |
|------------|---------|-------------|-------------|
| ABHD11-AS1 | FXYD5   | 0.255803408 | 6.11E-08    |
| ABHD11-AS1 | CLDN9   | 0.440514216 | 0           |
| ABHD11-AS1 | FAM43A  | 0.499048131 | 0           |
| ABHD11-AS1 | CHST2   | 0.291502396 | 5.78E-10    |
| ABHD11-AS1 | HMGA2   | 0.153104247 | 0.001306792 |
| ABHD11-AS1 | GALNT7  | 0.249195642 | 1.35E-07    |
| ABHD11-AS1 | CBLN1   | 0.387295506 | 0           |
| ABHD11-AS1 | STRA6   | 0.377623065 | 1.43E-16    |
| ABHD11-AS1 | MUC21   | 0.501221461 | 2.66E-29    |
| ABHD11-AS1 | PRR36   | 0.318250751 | 1.13E-11    |
| ABHD11-AS1 | NFE2L3  | 0.302911491 | 1.13E-10    |
| ABHD11-AS1 | NR1D1   | 0.4297397   | 0           |
| ABHD11-AS1 | MUC1    | 0.593131253 | 0           |
| ABHD11-AS1 | NAT8L   | 0.071856109 | 0.132748138 |
| ABHD11-AS1 | APOC1   | 0.102667815 | 0.031539794 |
| ABHD11-AS1 | EVA1A   | 0.453457422 | 0           |
| ABHD11-AS1 | ENTPD1  | 0.130585759 | 0.006175534 |
| ABHD11-AS1 | COL1A1  | 0.249099334 | 1.36E-07    |
| ABHD11-AS1 | FNDC4   | 0.349017069 | 6.87E-14    |
| ABHD11-AS1 | FRMD3   | 0.092107898 | 0.053820692 |
| ABHD11-AS1 | SHROOM4 | 0.216589555 | 4.91E-06    |
| ABHD11-AS1 | NELL2   | 0.175678052 | 0.000220956 |
| ABHD11-AS1 | EPHB3   | 0.437696054 | 0           |
| ABHD11-AS1 | TMC6    | 0.462074879 | 0           |
| ABHD11-AS1 | NOD1    | 0.313921314 | 2.19E-11    |
| ABHD11-AS1 | GGCT    | 0.532993444 | 0           |
| ABHD11-AS1 | ICAM1   | 0.35478445  | 2.40E-14    |
| ABHD11-AS1 | PRSS23  | 0.249737743 | 1.26E-07    |
| ABHD11-AS1 | CFI     | 0.28458429  | 1.50E-09    |
| ABHD11-AS1 | CD55    | 0.477814545 | 0           |
| ABHD11-AS1 | RASD2   | 0.280741638 | 2.52E-09    |
| ABHD11-AS1 | KLK11   | 0.318783349 | 7.95E-12    |
| ABHD11-AS1 | ICAM5   | 0.368950575 | 1.38E-15    |
| ABHD11-AS1 | ADORA1  | 0.443549956 | 0           |
| ABHD11-AS1 | ITGA2   | 0.359756409 | 9.29E-15    |
| ABHD11-AS1 | ABCC3   | 0.323076618 | 5.29E-12    |
| ABHD11-AS1 | MFGE8   | 0.357960325 | 1.31E-14    |
| ABHD11-AS1 | STK32A  | 0.20656479  | 1.34E-05    |
| ABHD11-AS1 | CYSLTR2 | 0.132950468 | 0.005299617 |
| ABHD11-AS1 | LAD1    | 0.582089374 | 0           |
| ABHD11-AS1 | MGAT3   | 0.393542014 | 0           |
| ABHD11-AS1 | IGFBP6  | 0.362185653 | 5.74E-15    |
| ABHD11-AS1 | CYP2S1  | 0.479646514 | 0           |
| ABHD11-AS1 | KCNJ2   | 0.24884885  | 1.40E-07    |
| ABHD11-AS1 | FAM20A  | 0.281308277 | 2.34E-09    |
| ABHD11-AS1 | TGFA    | 0.268508895 | 1.25E-08    |
| ABHD11-AS1 | MXRA8   | 0.42410522  | 0           |
| ABHD11-AS1 | C8orf4  | 0.186485049 | 8.71E-05    |
| ABHD11-AS1 | CLDN10  | 0.356403648 | 1.36E-14    |
| ABHD11-AS1 | PDE5A   | 0.307303052 | 5.92E-11    |
| ABHD11-AS1 | APOE    | 0.070355047 | 0.141051145 |



|            |           |             |             |
|------------|-----------|-------------|-------------|
| ABHD11-AS1 | SPOCK2    | 0.331409833 | 1.39E-12    |
| ABHD11-AS1 | TENM1     | 0.102291379 | 0.032170994 |
| ABHD11-AS1 | SLIT1     | 0.084626699 | 0.076525702 |
| ABHD11-AS1 | CXCL14    | 0.074345351 | 0.119817574 |
| ABHD11-AS1 | ECM1      | 0.083050037 | 0.082189017 |
| ABHD11-AS1 | DUSP5     | 0.483841063 | 0           |
| ABHD11-AS1 | SEZ6L2    | 0.329317735 | 1.95E-12    |
| ABHD11-AS1 | THRSP     | 0.244262972 | 2.40E-07    |
| ABHD11-AS1 | C19orf33  | 0.573391496 | 0           |
| ABHD11-AS1 | MPZL2     | 0.33187052  | 1.29E-12    |
| ABHD11-AS1 | CTSH      | 0.476071225 | 0           |
| ABHD11-AS1 | CYP1B1    | 0.366792523 | 2.21E-15    |
| ABHD11-AS1 | ALOX5     | 0.449195925 | 0           |
| ABHD11-AS1 | SYTL5     | 0.332379443 | 8.77E-13    |
| ABHD11-AS1 | TNFRSF12A | 0.434822718 | 0           |
| ABHD11-AS1 | DUSP6     | 0.324099689 | 4.50E-12    |
| ABHD11-AS1 | ALOX15B   | 0.522677062 | 0           |
| ABHD11-AS1 | SDC4      | 0.382511198 | 1.09E-17    |
| ABHD11-AS1 | MDK       | 0.331068714 | 1.47E-12    |
| ABHD11-AS1 | KRT19     | 0.579414042 | 0           |
| ABHD11-AS1 | MET       | 0.429992312 | 0           |
| ABHD11-AS1 | TESC      | 0.164350655 | 0.000554382 |
| ABHD11-AS1 | CXCL17    | 0.61091836  | 2.91E-46    |
| ABHD11-AS1 | NPC2      | 0.427644766 | 0           |
| ABHD11-AS1 | COMP      | 0.324382654 | 4.30E-12    |
| ABHD11-AS1 | TUSC3     | 0.167323987 | 0.000437856 |
| ABHD11-AS1 | TMPRSS4   | 0.49706851  | 0           |
| ABHD11-AS1 | LGALS3    | 0.641612603 | 0           |
| ABHD11-AS1 | CRLF1     | 0.271033312 | 9.06E-09    |
| ABHD11-AS1 | CTXN1     | 0.415524216 | 0           |
| ABHD11-AS1 | PCSK1N    | 0.056844067 | 0.234503674 |
| ABHD11-AS1 | NMU       | 0.514892972 | 4.33E-31    |
| ABHD11-AS1 | GALE      | 0.492959063 | 0           |
| ABHD11-AS1 | PCSK2     | 0.110300922 | 0.020845167 |
| ABHD11-AS1 | GJB3      | 0.415818102 | 0           |
| ABHD11-AS1 | SLPI      | 0.456445363 | 0           |
| ABHD11-AS1 | AGR2      | 0.163748131 | 0.000581259 |
| ABHD11-AS1 | MRC2      | 0.259453587 | 3.91E-08    |
| ABHD11-AS1 | GOLT1A    | 0.412737967 | 0           |
| ABHD11-AS1 | SLC27A6   | 0.322113058 | 4.68E-12    |
| ABHD11-AS1 | KCNN4     | 0.459224945 | 0           |
| ABHD11-AS1 | ETV4      | 0.340240837 | 2.33E-13    |
| ABHD11-AS1 | SYT12     | 0.464136765 | 0           |
| ABHD11-AS1 | PVRL4     | 0.562084098 | 0           |
| ABHD11-AS1 | PLCD3     | 0.51363069  | 0           |
| ABHD11-AS1 | PLAU      | 0.330697952 | 1.56E-12    |
| ABHD11-AS1 | LRRK2     | 0.016116528 | 0.736214914 |
| ABHD11-AS1 | SFN       | 0.522358496 | 0           |
| ABHD11-AS1 | LPAR5     | 0.364794747 | 3.37E-15    |
| ABHD11-AS1 | NGEF      | 0.487938312 | 0           |
| ABHD11-AS1 | DTX4      | 0.478854211 | 0           |

|             |          |              |             |
|-------------|----------|--------------|-------------|
| ABHD11-AS1  | CST6     | 0.467678155  | 0           |
| ABHD11-AS1  | QPCT     | 0.295084351  | 3.49E-10    |
| ABHD11-AS1  | TIMP1    | 0.428332818  | 0           |
| ABHD11-AS1  | CAMK2N1  | 0.296245571  | 2.96E-10    |
| ABHD11-AS1  | KLHDC8A  | 0.068053314  | 0.154548611 |
| ABHD11-AS1  | PDLIM4   | 0.569764721  | 0           |
| ABHD11-AS1  | SCEL     | 0.371935396  | 6.88E-16    |
| ABHD11-AS1  | LCN2     | 0.590347841  | 0           |
| ABHD11-AS1  | PROS1    | 0.508648094  | 0           |
| ABHD11-AS1  | GABRB2   | 0.396342588  | 0           |
| ABHD11-AS1  | TMPRSS6  | 0.569869255  | 0           |
| ABHD11-AS1  | KLK7     | 0.475819558  | 3.48E-26    |
| ABHD11-AS1  | PDZK1IP1 | 0.438306663  | 0           |
| ABHD11-AS1  | CDH3     | 0.213587146  | 6.67E-06    |
| ABHD11-AS1  | LRP4     | 0.060143482  | 0.208415693 |
| ABHD11-AS1  | IGSF1    | 0.192928001  | 4.88E-05    |
| ABHD11-AS1  | B3GNT3   | 0.547897974  | 0           |
| ABHD11-AS1  | CLDN1    | 0.307331278  | 5.90E-11    |
| ABHD11-AS1  | GDF15    | 0.581469404  | 0           |
| ABHD11-AS1  | ARHGAP36 | 0.231430533  | 9.49E-07    |
| ABHD11-AS1  | LAMB3    | 0.350233038  | 5.52E-14    |
| ABHD11-AS1  | KLK10    | 0.480646465  | 0           |
| ABHD11-AS1  | DPP4     | 0.464821129  | 0           |
| ABHD11-AS1  | METTL7B  | 0.398135551  | 0           |
| ABHD11-AS1  | LIPH     | 0.457988835  | 0           |
| ABHD11-AS1  | CLDN16   | 0.375262753  | 2.91E-16    |
| ABHD11-AS1  | CHI3L1   | 0.484806832  | 0           |
| ABHD11-AS1  | SLC22A31 | 0.394155315  | 9.09E-18    |
| ABHD11-AS1  | TACSTD2  | 0.499680866  | 0           |
| ABHD11-AS1  | SFTPB    | 0.489832973  | 0           |
| ABHD11-AS1  | RXRG     | 0.24520165   | 2.15E-07    |
| ABHD11-AS1  | DCSTAMP  | 0.532985808  | 1.38E-33    |
| ABHD11-AS1  | CITED1   | 0.448086759  | 0           |
| ABHD11-AS1  | SERPINA1 | 0.554589282  | 0           |
| ABHD11-AS1  | PRR15    | 0.206268918  | 1.38E-05    |
| ABHD11-AS1  | SLC34A2  | 0.582656439  | 0           |
| ABHD11-AS1  | FN1      | 0.492290726  | 0           |
| ABHD11-AS1  | ZCCHC12  | 0.182825793  | 0.000120069 |
| RP3-449M8.9 | TFF3     | -0.490832499 | 0           |
| RP3-449M8.9 | CCL21    | -0.385329568 | 5.47E-17    |
| RP3-449M8.9 | TPO      | -0.537016938 | 0           |
| RP3-449M8.9 | MT1G     | -0.487361744 | 0           |
| RP3-449M8.9 | DIO1     | -0.559848178 | 0           |
| RP3-449M8.9 | DPT      | -0.323888254 | 3.52E-12    |
| RP3-449M8.9 | CDH16    | -0.523515745 | 0           |
| RP3-449M8.9 | CRABP1   | -0.384452654 | 6.52E-17    |
| RP3-449M8.9 | SLC26A7  | -0.455655472 | 0           |
| RP3-449M8.9 | MT1H     | -0.471545553 | 1.10E-25    |
| RP3-449M8.9 | SLC26A4  | -0.449328827 | 0           |
| RP3-449M8.9 | SLC5A8   | -0.540503274 | 1.15E-34    |
| RP3-449M8.9 | PKHD1L1  | -0.5226025   | 3.90E-32    |

|             |           |              |             |
|-------------|-----------|--------------|-------------|
| RP3-449M8.9 | TFCP2L1   | -0.544514023 | 0           |
| RP3-449M8.9 | WSCD2     | -0.528891604 | 5.23E-33    |
| RP3-449M8.9 | IPCEF1    | -0.504200365 | 0           |
| RP3-449M8.9 | SLC5A5    | -0.413153606 | 1.58E-19    |
| RP3-449M8.9 | MT1F      | -0.488052775 | 0           |
| RP3-449M8.9 | FOSB      | -0.243683567 | 2.57E-07    |
| RP3-449M8.9 | SEMA3D    | -0.547461915 | 1.08E-35    |
| RP3-449M8.9 | BMP8A     | -0.476174766 | 0           |
| RP3-449M8.9 | MATN2     | -0.553194881 | 0           |
| RP3-449M8.9 | PLA2R1    | -0.550699115 | 0           |
| RP3-449M8.9 | COL23A1   | -0.404529427 | 0           |
| RP3-449M8.9 | HGD       | -0.511553911 | 0           |
| RP3-449M8.9 | TCEAL2    | -0.441125109 | 0           |
| RP3-449M8.9 | CHRD1     | -0.338206467 | 3.30E-13    |
| RP3-449M8.9 | TNFRSF11B | -0.534271539 | 0           |
| RP3-449M8.9 | FAM167A   | -0.520243563 | 0           |
| RP3-449M8.9 | KIT       | -0.529613324 | 0           |
| RP3-449M8.9 | SLC4A4    | -0.579251355 | 0           |
| RP3-449M8.9 | SMOC2     | -0.367120876 | 2.06E-15    |
| RP3-449M8.9 | FHL1      | -0.559406355 | 0           |
| RP3-449M8.9 | OTOS      | -0.449967377 | 0           |
| RP3-449M8.9 | IGFBPL1   | -0.554075201 | 1.09E-36    |
| RP3-449M8.9 | HBB       | -0.285542825 | 1.32E-09    |
| RP3-449M8.9 | BEX1      | -0.403406077 | 0           |
| RP3-449M8.9 | FABP4     | -0.42794694  | 5.63E-21    |
| RP3-449M8.9 | LMOD1     | -0.457152705 | 0           |
| RP3-449M8.9 | SOD3      | -0.543534922 | 0           |
| RP3-449M8.9 | TMEM171   | -0.494448353 | 0           |
| RP3-449M8.9 | PI16      | -0.315234868 | 1.79E-11    |
| RP3-449M8.9 | ZMAT4     | -0.544051164 | 3.46E-35    |
| RP3-449M8.9 | MFAP4     | -0.243852779 | 2.52E-07    |
| RP3-449M8.9 | CWH43     | -0.514494426 | 4.89E-31    |
| RP3-449M8.9 | SPX       | -0.49637053  | 0           |
| RP3-449M8.9 | APOD      | -0.227288046 | 1.60E-06    |
| RP3-449M8.9 | DPP6      | -0.509183529 | 0           |
| RP3-449M8.9 | MMRN1     | -0.356826196 | 1.63E-14    |
| RP3-449M8.9 | WDR72     | -0.486545188 | 0           |
| RP3-449M8.9 | MPPED2    | -0.527442506 | 0           |
| RP3-449M8.9 | PAPSS2    | -0.450530329 | 0           |
| RP3-449M8.9 | DCN       | -0.213505022 | 6.73E-06    |
| RP3-449M8.9 | SORBS2    | -0.568805051 | 0           |
| RP3-449M8.9 | EGR2      | -0.23019131  | 1.17E-06    |
| RP3-449M8.9 | EDN3      | -0.302373133 | 9.84E-11    |
| RP3-449M8.9 | DIO2      | -0.501239373 | 0           |
| RP3-449M8.9 | ITPR1     | -0.579553894 | 0           |
| RP3-449M8.9 | CFD       | -0.238452472 | 4.67E-07    |
| RP3-449M8.9 | CPXM1     | -0.369216946 | 1.30E-15    |
| RP3-449M8.9 | ELMO1     | -0.551781049 | 0           |
| RP3-449M8.9 | GPC3      | -0.407698083 | 5.20E-19    |
| RP3-449M8.9 | MYOC      | -0.134573695 | 0.004736164 |
| RP3-449M8.9 | DEPTOR    | -0.541850322 | 0           |

|             |            |              |          |
|-------------|------------|--------------|----------|
| RP3-449M8.9 | DGKI       | -0.537725131 | 0        |
| RP3-449M8.9 | CARTPT     | -0.391191674 | 1.67E-17 |
| RP3-449M8.9 | IYD        | -0.398105481 | 0        |
| RP3-449M8.9 | LYVE1      | -0.28964674  | 7.48E-10 |
| RP3-449M8.9 | CLCNKB     | -0.4663985   | 0        |
| RP3-449M8.9 | NCAM1      | -0.582688353 | 0        |
| RP3-449M8.9 | HBA2       | -0.219409702 | 3.67E-06 |
| RP3-449M8.9 | GLT8D2     | -0.442458945 | 0        |
| RP3-449M8.9 | OGDHL      | -0.518811291 | 0        |
| RP3-449M8.9 | LIFR       | -0.534002757 | 0        |
| RP3-449M8.9 | CSGALNACT1 | -0.521674132 | 0        |
| RP3-449M8.9 | RAP1GAP    | -0.448877501 | 0        |
| RP3-449M8.9 | COL9A3     | -0.4440088   | 0        |
| RP3-449M8.9 | FBLN1      | -0.259809314 | 3.74E-08 |
| RP3-449M8.9 | EFEMP1     | -0.450476998 | 0        |
| RP3-449M8.9 | AOX1       | -0.544587514 | 2.88E-35 |
| RP3-449M8.9 | GRIN2C     | -0.509879665 | 0        |
| RP3-449M8.9 | C11orf74   | -0.45295773  | 0        |
| RP3-449M8.9 | PPARGC1A   | -0.557927135 | 0        |
| RP3-449M8.9 | ANGPTL1    | -0.428684858 | 0        |
| RP3-449M8.9 | SCARA5     | -0.325318561 | 2.79E-12 |
| RP3-449M8.9 | LTF        | -0.512062397 | 0        |
| RP3-449M8.9 | CA4        | -0.36571306  | 2.44E-15 |
| RP3-449M8.9 | TG         | -0.426485815 | 0        |
| RP3-449M8.9 | FCGBP      | -0.530662493 | 0        |
| RP3-449M8.9 | PBX4       | -0.382451059 | 1.16E-17 |
| RP3-449M8.9 | CYR61      | -0.268695978 | 1.22E-08 |
| RP3-449M8.9 | FOS        | -0.306660246 | 6.52E-11 |
| RP3-449M8.9 | KHDRBS2    | -0.468144799 | 0        |
| RP3-449M8.9 | MUM1L1     | -0.496939013 | 0        |
| RP3-449M8.9 | RGS16      | -0.437321037 | 0        |
| RP3-449M8.9 | MT1M       | -0.406133747 | 0        |
| RP3-449M8.9 | LRP2       | -0.505425554 | 0        |
| RP3-449M8.9 | MAFB       | -0.474327054 | 0        |
| RP3-449M8.9 | KCNK2      | -0.542185625 | 0        |
| RP3-449M8.9 | TBC1D4     | -0.517058043 | 0        |
| RP3-449M8.9 | MIOX       | -0.466236255 | 4.47E-25 |
| RP3-449M8.9 | TPPP       | -0.462222106 | 0        |
| RP3-449M8.9 | FMOD       | -0.597496149 | 0        |
| RP3-449M8.9 | CITED2     | -0.463920747 | 0        |
| RP3-449M8.9 | RGS8       | -0.533115452 | 1.33E-33 |
| RP3-449M8.9 | ABI3BP     | -0.369629975 | 1.18E-15 |
| RP3-449M8.9 | ADH1B      | -0.333010417 | 7.90E-13 |
| RP3-449M8.9 | OGN        | -0.272544018 | 6.46E-09 |
| RP3-449M8.9 | NR4A1      | -0.196378614 | 3.55E-05 |
| RP3-449M8.9 | FOXJ1      | -0.409365801 | 3.63E-19 |
| RP3-449M8.9 | ALDH1A1    | -0.478402176 | 0        |
| RP3-449M8.9 | OCA2       | -0.48225676  | 5.97E-27 |
| RP3-449M8.9 | TMEM139    | -0.359550178 | 9.67E-15 |
| RP3-449M8.9 | ARHGAP24   | -0.509803215 | 0        |
| RP3-449M8.9 | SLC25A15   | -0.558305557 | 0        |

|             |          |              |             |
|-------------|----------|--------------|-------------|
| RP3-449M8.9 | DES      | -0.260023994 | 3.24E-08    |
| RP3-449M8.9 | GDF10    | -0.460848122 | 1.82E-24    |
| RP3-449M8.9 | KIAA1324 | -0.479346812 | 0           |
| RP3-449M8.9 | JUN      | -0.245420646 | 2.10E-07    |
| RP3-449M8.9 | C7       | -0.177962481 | 0.000182277 |
| RP3-449M8.9 | LGI3     | -0.498196115 | 0           |
| RP3-449M8.9 | CDON     | -0.555261023 | 0           |
| RP3-449M8.9 | BCL2     | -0.620974875 | 0           |
| RP3-449M8.9 | HLF      | -0.433246056 | 0           |
| RP3-449M8.9 | EGR1     | -0.288048661 | 9.33E-10    |
| RP3-449M8.9 | IP6K3    | -0.505612495 | 0           |
| RP3-449M8.9 | SCUBE3   | -0.47101927  | 0           |
| RP3-449M8.9 | PKNOX2   | -0.476895724 | 0           |
| RP3-449M8.9 | SMAD9    | -0.545127611 | 0           |
| RP3-449M8.9 | IQGAP2   | -0.569370413 | 0           |
| RP3-449M8.9 | GNA14    | -0.543391808 | 0           |
| RP3-449M8.9 | LAYN     | -0.451073423 | 0           |
| RP3-449M8.9 | AVPR1A   | -0.453930732 | 0           |
| RP3-449M8.9 | PDLIM3   | -0.457782036 | 0           |
| RP3-449M8.9 | GPM6A    | -0.448836226 | 0           |
| RP3-449M8.9 | SDPR     | -0.269339067 | 1.13E-08    |
| RP3-449M8.9 | CRYAB    | -0.329343266 | 1.94E-12    |
| RP3-449M8.9 | FOXA2    | -0.368779827 | 1.37E-15    |
| RP3-449M8.9 | C8orf88  | -0.46914007  | 0           |
| RP3-449M8.9 | ISM1     | -0.433967014 | 0           |
| RP3-449M8.9 | BMP2     | -0.317414337 | 1.28E-11    |
| RP3-449M8.9 | ID4      | -0.536182936 | 0           |
| RP3-449M8.9 | NUPR1    | -0.379747643 | 6.51E-17    |
| RP3-449M8.9 | SERTM1   | -0.587651374 | 4.08E-42    |
| RP3-449M8.9 | IRS1     | -0.505857874 | 0           |
| RP3-449M8.9 | FIBIN    | -0.355112519 | 2.25E-14    |
| RP3-449M8.9 | PODN     | -0.242771412 | 2.85E-07    |
| RP3-449M8.9 | TDRD9    | -0.403660816 | 0           |
| RP3-449M8.9 | EPHA3    | -0.370158035 | 1.05E-15    |
| RP3-449M8.9 | AIF1L    | -0.442337249 | 0           |
| RP3-449M8.9 | EBF4     | -0.508853474 | 0           |
| RP3-449M8.9 | ADM2     | -0.541708485 | 0           |
| RP3-449M8.9 | GSTM3    | -0.475474942 | 0           |
| RP3-449M8.9 | HSD17B6  | -0.294196876 | 3.96E-10    |
| RP3-449M8.9 | AGR3     | -0.250893168 | 9.97E-08    |
| RP3-449M8.9 | EPHB1    | -0.465534286 | 0           |
| RP3-449M8.9 | TMOD1    | -0.367574046 | 1.87E-15    |
| RP3-449M8.9 | WASF3    | -0.545927289 | 0           |
| RP3-449M8.9 | SELV     | -0.490362857 | 6.15E-28    |
| RP3-449M8.9 | ENPP1    | -0.316194113 | 1.55E-11    |
| RP3-449M8.9 | SYNE1    | -0.556533038 | 4.57E-37    |
| RP3-449M8.9 | PLCH1    | -0.493730941 | 0           |
| RP3-449M8.9 | CCDC146  | -0.471933268 | 0           |
| RP3-449M8.9 | SLC16A2  | -0.501901469 | 0           |
| RP3-449M8.9 | IER2     | -0.327099686 | 2.79E-12    |
| RP3-449M8.9 | KCNAB1   | -0.408561147 | 0           |

|             |          |              |             |
|-------------|----------|--------------|-------------|
| RP3-449M8.9 | SYNDIG1  | -0.539892402 | 0           |
| RP3-449M8.9 | C16orf89 | -0.380255278 | 5.19E-17    |
| RP3-449M8.9 | CTGF     | -0.187304442 | 8.10E-05    |
| RP3-449M8.9 | NR4A3    | -0.140865405 | 0.003121995 |
| RP3-449M8.9 | KIAA1456 | -0.414362002 | 0           |
| RP3-449M8.9 | AQP4     | -0.36092075  | 7.39E-15    |
| RP3-449M8.9 | RNF150   | -0.584715205 | 0           |
| RP3-449M8.9 | C1S      | -0.197766065 | 3.11E-05    |
| RP3-449M8.9 | PFKFB2   | -0.496477759 | 0           |
| RP3-449M8.9 | PROX1    | -0.456121974 | 0           |
| RP3-449M8.9 | TCF7L1   | -0.502034795 | 0           |
| RP3-449M8.9 | HSPB6    | -0.271904617 | 8.09E-09    |
| RP3-449M8.9 | FHDC1    | -0.347443669 | 9.09E-14    |
| RP3-449M8.9 | PRR15L   | -0.380194289 | 5.34E-17    |
| RP3-449M8.9 | SLC1A1   | -0.442226332 | 0           |
| RP3-449M8.9 | BTBD11   | -0.512743215 | 0           |
| RP3-449M8.9 | TRIM58   | -0.568934122 | 0           |
| RP3-449M8.9 | LRIG1    | -0.538991311 | 0           |
| RP3-449M8.9 | ROR2     | -0.490544002 | 0           |
| RP3-449M8.9 | GPR125   | -0.510858909 | 0           |
| RP3-449M8.9 | FLRT1    | -0.544533739 | 0           |
| RP3-449M8.9 | PGF      | -0.426629638 | 0           |
| RP3-449M8.9 | DUSP1    | -0.251200651 | 1.06E-07    |
| RP3-449M8.9 | PLA2G7   | -0.4235539   | 0           |
| RP3-449M8.9 | PLSCR4   | -0.456146512 | 0           |
| RP3-449M8.9 | FAM46B   | -0.333552708 | 9.75E-13    |
| RP3-449M8.9 | GLDC     | -0.522709259 | 0           |
| RP3-449M8.9 | ZBTB16   | -0.335115895 | 7.52E-13    |
| RP3-449M8.9 | OMD      | -0.240681007 | 3.33E-07    |
| RP3-449M8.9 | HSD11B2  | -0.350898964 | 4.89E-14    |
| RP3-449M8.9 | FGL2     | -0.29284531  | 4.79E-10    |
| RP3-449M8.9 | CLCNKA   | -0.488248456 | 1.12E-27    |
| RP3-449M8.9 | GATM     | -0.420785664 | 0           |
| RP3-449M8.9 | TNS3     | -0.543198768 | 0           |
| RP3-449M8.9 | TOB1     | -0.456482808 | 0           |
| RP3-449M8.9 | MARC2    | -0.478479903 | 0           |
| RP3-449M8.9 | LRRC2    | -0.517409231 | 0           |
| RP3-449M8.9 | SORD     | -0.331194808 | 1.44E-12    |
| RP3-449M8.9 | RIMS4    | -0.417841835 | 0           |
| RP3-449M8.9 | SLC29A4  | -0.478807547 | 0           |
| RP3-449M8.9 | SLC39A14 | -0.532255749 | 0           |
| RP3-449M8.9 | FAXDC2   | -0.551821756 | 0           |
| RP3-449M8.9 | HSPB8    | -0.432228517 | 0           |
| RP3-449M8.9 | CCL19    | -0.084707728 | 0.07623675  |
| RP3-449M8.9 | KCNIP3   | -0.481572662 | 0           |
| RP3-449M8.9 | CGNL1    | -0.436720357 | 0           |
| RP3-449M8.9 | ATF3     | -0.062310896 | 0.192461329 |
| RP3-449M8.9 | SGCD     | -0.439697234 | 0           |
| RP3-449M8.9 | STARD13  | -0.534971789 | 0           |
| RP3-449M8.9 | LDHD     | -0.450189211 | 0           |
| RP3-449M8.9 | RCAN1    | -0.370299021 | 1.01E-15    |

|             |          |              |             |
|-------------|----------|--------------|-------------|
| RP3-449M8.9 | ID3      | -0.47925944  | 0           |
| RP3-449M8.9 | SYTL3    | -0.470768927 | 0           |
| RP3-449M8.9 | MT1E     | -0.308165138 | 5.21E-11    |
| RP3-449M8.9 | CAMK1D   | -0.447958113 | 0           |
| RP3-449M8.9 | PRKCQ    | -0.520537733 | 0           |
| RP3-449M8.9 | NUAK2    | -0.477212446 | 0           |
| RP3-449M8.9 | LIPG     | -0.357556515 | 1.42E-14    |
| RP3-449M8.9 | SLC25A25 | -0.334726552 | 8.03E-13    |
| RP3-449M8.9 | PRKX     | -0.31105663  | 3.38E-11    |
| RP3-449M8.9 | SRPX     | -0.212798957 | 7.22E-06    |
| RP3-449M8.9 | FAM189A1 | -0.425600609 | 0           |
| RP3-449M8.9 | PLEKHH1  | -0.372802588 | 5.55E-16    |
| RP3-449M8.9 | WNT11    | -0.434634074 | 0           |
| RP3-449M8.9 | SNAI1    | -0.412276855 | 0           |
| RP3-449M8.9 | FDCSP    | -0.137094064 | 0.00400396  |
| RP3-449M8.9 | MT1X     | -0.229403688 | 1.27E-06    |
| RP3-449M8.9 | ACACB    | -0.571479957 | 0           |
| RP3-449M8.9 | ARC      | -0.045970123 | 0.336444072 |
| RP3-449M8.9 | KLK4     | -0.354124408 | 2.04E-14    |
| RP3-449M8.9 | ZFPM2    | -0.398342066 | 0           |
| RP3-449M8.9 | AKAP12   | -0.3866249   | 0           |
| RP3-449M8.9 | GJB6     | -0.404302261 | 1.08E-18    |
| RP3-449M8.9 | ERO1LB   | -0.503375156 | 0           |
| RP3-449M8.9 | DNALI1   | -0.352905959 | 3.39E-14    |
| RP3-449M8.9 | HKDC1    | -0.459760097 | 0           |
| RP3-449M8.9 | ZFP36L2  | -0.443917598 | 0           |
| RP3-449M8.9 | CAPSL    | -0.467451724 | 3.25E-25    |
| RP3-449M8.9 | CYP7B1   | -0.520492771 | 0           |
| RP3-449M8.9 | CPQ      | -0.443040477 | 0           |
| RP3-449M8.9 | RPS6KA6  | -0.498317829 | 6.22E-29    |
| RP3-449M8.9 | TLE1     | -0.512547054 | 0           |
| RP3-449M8.9 | TP53INP2 | -0.447200135 | 0           |
| RP3-449M8.9 | KATNAL2  | -0.517187114 | 0           |
| RP3-449M8.9 | SGPP2    | -0.407506163 | 0           |
| RP3-449M8.9 | CTH      | -0.560354536 | 0           |
| RP3-449M8.9 | KIF12    | -0.309742509 | 4.12E-11    |
| RP3-449M8.9 | TMEM220  | -0.462505496 | 0           |
| RP3-449M8.9 | CENPJ    | -0.42514049  | 0           |
| RP3-449M8.9 | FAM155B  | -0.299619309 | 1.82E-10    |
| RP3-449M8.9 | WFS1     | -0.587201752 | 0           |
| RP3-449M8.9 | SELENBP1 | -0.355680861 | 2.03E-14    |
| RP3-449M8.9 | SNTA1    | -0.447273039 | 0           |
| RP3-449M8.9 | FRAS1    | -0.35183367  | 4.13E-14    |
| RP3-449M8.9 | FBLN7    | -0.539266759 | 0           |
| RP3-449M8.9 | AGPAT9   | -0.447936979 | 0           |
| RP3-449M8.9 | GPR83    | -0.421766184 | 0           |
| RP3-449M8.9 | PRTG     | -0.478998601 | 0           |
| RP3-449M8.9 | EGR3     | -0.084895622 | 0.075592188 |
| RP3-449M8.9 | GRAMD2   | -0.440058068 | 0           |
| RP3-449M8.9 | HYOU1    | -0.606803076 | 0           |
| RP3-449M8.9 | FBLN5    | -0.331339056 | 1.40E-12    |

|             |          |              |             |
|-------------|----------|--------------|-------------|
| RP3-449M8.9 | ITM2A    | -0.44346996  | 0           |
| RP3-449M8.9 | SRF      | -0.349783698 | 5.98E-14    |
| RP3-449M8.9 | FGFR2    | -0.394439701 | 0           |
| RP3-449M8.9 | MT1A     | -0.175715504 | 0.000215617 |
| RP3-449M8.9 | MAMDC2   | -0.226219445 | 1.79E-06    |
| RP3-449M8.9 | FHL2     | -0.449438609 | 0           |
| RP3-449M8.9 | FTCDNL1  | -0.481614078 | 0           |
| RP3-449M8.9 | PKIA     | -0.299887807 | 1.75E-10    |
| RP3-449M8.9 | DNAJB4   | -0.31811941  | 1.15E-11    |
| RP3-449M8.9 | SLC25A33 | -0.462791582 | 0           |
| RP3-449M8.9 | EYA2     | -0.380768587 | 4.02E-17    |
| RP3-449M8.9 | LPAR1    | -0.401207034 | 0           |
| RP3-449M8.9 | STX11    | -0.336798935 | 5.68E-13    |
| RP3-449M8.9 | ARHGEF28 | -0.50502302  | 0           |
| RP3-449M8.9 | OR2W3    | -0.535863093 | 0           |
| RP3-449M8.9 | ALDH1B1  | -0.574065526 | 7.61E-40    |
| RP3-449M8.9 | CXCL12   | -0.291960104 | 5.42E-10    |
| RP3-449M8.9 | OLFM2    | -0.395506032 | 0           |
| RP3-449M8.9 | TUB      | -0.408991907 | 0           |
| RP3-449M8.9 | HTRA3    | -0.272398778 | 7.59E-09    |
| RP3-449M8.9 | CKB      | -0.380346338 | 4.97E-17    |
| RP3-449M8.9 | RGS2     | -0.12672325  | 0.007888415 |
| RP3-449M8.9 | SHANK2   | -0.49418255  | 0           |
| RP3-449M8.9 | CNTFR    | -0.398307721 | 3.83E-18    |
| RP3-449M8.9 | CYTH3    | -0.508502427 | 0           |
| RP3-449M8.9 | PLAC9    | -0.238581685 | 4.60E-07    |
| RP3-449M8.9 | WVOX     | -0.465070479 | 0           |
| RP3-449M8.9 | NPR3     | -0.43694531  | 0           |
| RP3-449M8.9 | SDC2     | -0.377808162 | 1.34E-16    |
| RP3-449M8.9 | KLF15    | -0.366547571 | 2.33E-15    |
| RP3-449M8.9 | TMEM164  | -0.639780209 | 0           |
| RP3-449M8.9 | LONRF3   | -0.213349285 | 6.83E-06    |
| RP3-449M8.9 | GBP1     | -0.181688685 | 0.000132506 |
| RP3-449M8.9 | ARHGAP6  | -0.409007083 | 0           |
| RP3-449M8.9 | TMEM119  | -0.247580259 | 1.63E-07    |
| RP3-449M8.9 | SH3RF1   | -0.454527867 | 0           |
| RP3-449M8.9 | CRELD2   | -0.445797366 | 0           |
| RP3-449M8.9 | PCP4     | -0.118635555 | 0.012908022 |
| RP3-449M8.9 | GCSH     | -0.435727639 | 0           |
| RP3-449M8.9 | IMPA2    | -0.433977368 | 0           |
| RP3-449M8.9 | C1R      | -0.167760704 | 0.000422801 |
| RP3-449M8.9 | SUCNR1   | -0.331440044 | 1.38E-12    |
| RP3-449M8.9 | SFRP1    | -0.398527872 | 0           |
| RP3-449M8.9 | UGT8     | -0.500807621 | 0           |
| RP3-449M8.9 | TLE4     | -0.300932154 | 1.51E-10    |
| RP3-449M8.9 | ANTXR1   | -0.451010873 | 0           |
| RP3-449M8.9 | GPX3     | -0.408495619 | 0           |
| RP3-449M8.9 | DPY19L2  | -0.398331428 | 0           |
| RP3-449M8.9 | FAM46C   | -0.531189276 | 0           |
| RP3-449M8.9 | IL33     | -0.321288134 | 5.34E-12    |
| RP3-449M8.9 | PEG3     | -0.52785043  | 0           |



|             |          |              |             |
|-------------|----------|--------------|-------------|
| RP3-449M8.9 | FAHD2A   | -0.418533716 | 0           |
| RP3-449M8.9 | PTGDS    | -0.129331635 | 0.00669101  |
| RP3-449M8.9 | CHCHD10  | -0.354837214 | 2.37E-14    |
| RP3-449M8.9 | CD36     | -0.420722972 | 0           |
| RP3-449M8.9 | ANKRD37  | -0.298900337 | 2.02E-10    |
| RP3-449M8.9 | TSPAN33  | -0.536497247 | 0           |
| RP3-449M8.9 | PRDM16   | -0.461835458 | 0           |
| RP3-449M8.9 | UST      | -0.345562484 | 1.27E-13    |
| RP3-449M8.9 | NEXN     | -0.413545872 | 0           |
| RP3-449M8.9 | NUPR1L   | -0.161443548 | 0.000685604 |
| RP3-449M8.9 | SLC24A3  | -0.5646722   | 0           |
| RP3-449M8.9 | MARC1    | -0.399164437 | 0           |
| RP3-449M8.9 | MYH11    | -0.297483809 | 2.48E-10    |
| RP3-449M8.9 | APOA1    | -0.407230233 | 5.76E-19    |
| RP3-449M8.9 | TMEM178B | -0.467550785 | 0           |
| RP3-449M8.9 | CAPN6    | -0.262304699 | 2.43E-08    |
| RP3-449M8.9 | PPM1L    | -0.565419682 | 0           |
| RP3-449M8.9 | FZD8     | -0.554850404 | 0           |
| RP3-449M8.9 | RCAN2    | -0.534105589 | 0           |
| RP3-449M8.9 | COPZ2    | -0.483333853 | 0           |
| RP3-449M8.9 | GAS1     | -0.326436739 | 3.10E-12    |
| RP3-449M8.9 | DACT1    | -0.465683924 | 0           |
| RP3-449M8.9 | WBSCR17  | -0.412948595 | 0           |
| RP3-449M8.9 | NCS1     | -0.452592641 | 0           |
| RP3-449M8.9 | SPIRE2   | -0.360222628 | 8.48E-15    |
| RP3-449M8.9 | C15orf52 | -0.438584948 | 0           |
| RP3-449M8.9 | SPAG5    | -0.441494311 | 0           |
| RP3-449M8.9 | ARL4D    | -0.448654817 | 0           |
| RP3-449M8.9 | FAM189A2 | -0.270778572 | 9.36E-09    |
| RP3-449M8.9 | MAP1LC3A | -0.39378413  | 0           |
| RP3-449M8.9 | KLF6     | -0.00535733  | 0.910844185 |
| RP3-449M8.9 | ADD3     | -0.360185183 | 8.54E-15    |
| RP3-449M8.9 | TSPAN7   | -0.37086254  | 8.88E-16    |
| RP3-449M8.9 | KLF9     | -0.248287033 | 1.50E-07    |
| RP3-449M8.9 | KCNQ1    | -0.436410443 | 0           |
| RP3-449M8.9 | MAN1A1   | -0.31701691  | 1.36E-11    |
| RP3-449M8.9 | MLF1     | -0.262515567 | 2.67E-08    |
| RP3-449M8.9 | RARB     | -0.494733162 | 0           |
| RP3-449M8.9 | CDC42EP2 | -0.290804982 | 6.37E-10    |
| RP3-449M8.9 | FAM3B    | -0.214708936 | 5.95E-06    |
| RP3-449M8.9 | GADD45B  | -0.127342795 | 0.007587862 |
| RP3-449M8.9 | TMEM47   | -0.380294993 | 5.09E-17    |
| RP3-449M8.9 | SDF2L1   | -0.343173946 | 1.92E-13    |
| RP3-449M8.9 | CCDC85A  | -0.413399212 | 0           |
| RP3-449M8.9 | CRYBG3   | -0.38671369  | 0           |
| RP3-449M8.9 | FBLN2    | -0.198702616 | 2.85E-05    |
| RP3-449M8.9 | PEBP4    | -0.153438132 | 0.001274956 |
| RP3-449M8.9 | CDADC1   | -0.476033922 | 0           |
| RP3-449M8.9 | FAM63A   | -0.509398979 | 0           |
| RP3-449M8.9 | GLUL     | -0.390659741 | 0           |
| RP3-449M8.9 | FREM2    | -0.448839489 | 0           |

|             |          |              |             |
|-------------|----------|--------------|-------------|
| RP3-449M8.9 | ACKR3    | -0.407234119 | 0           |
| RP3-449M8.9 | DENND6A  | -0.568197988 | 0           |
| RP3-449M8.9 | CLDN8    | -0.259175019 | 4.04E-08    |
| RP3-449M8.9 | UTS2R    | -0.284270649 | 1.32E-09    |
| RP3-449M8.9 | SCNN1B   | -0.315911715 | 1.61E-11    |
| RP3-449M8.9 | TTC30A   | -0.608678447 | 0           |
| RP3-449M8.9 | CORO2B   | -0.44920089  | 0           |
| RP3-449M8.9 | TC2N     | -0.476113067 | 0           |
| RP3-449M8.9 | ALDH2    | -0.483926874 | 0           |
| RP3-449M8.9 | GPR183   | -0.037609676 | 0.43169345  |
| RP3-449M8.9 | C4orf47  | -0.322242332 | 6.03E-12    |
| RP3-449M8.9 | SLC25A42 | -0.430735397 | 0           |
| RP3-449M8.9 | LGMN     | -0.572141202 | 0           |
| RP3-449M8.9 | ACSF2    | -0.504849553 | 0           |
| RP3-449M8.9 | KIAA1467 | -0.584593934 | 0           |
| RP3-449M8.9 | PRKG1    | -0.44824122  | 0           |
| RP3-449M8.9 | GNAI1    | -0.47020626  | 0           |
| RP3-449M8.9 | ABCC4    | -0.483868154 | 0           |
| RP3-449M8.9 | PRPS1    | -0.60171935  | 0           |
| RP3-449M8.9 | TSPAN5   | -0.506283669 | 0           |
| RP3-449M8.9 | CR2      | -0.271043279 | 7.87E-09    |
| RP3-449M8.9 | CCDC170  | -0.495216685 | 0           |
| RP3-449M8.9 | RRAD     | -0.040799309 | 0.393646721 |
| RP3-449M8.9 | SCGB2A1  | -0.408981694 | 0           |
| RP3-449M8.9 | SESN3    | -0.364849638 | 3.33E-15    |
| RP3-449M8.9 | SGK223   | -0.377448322 | 1.51E-16    |
| RP3-449M8.9 | NDRG2    | -0.512666907 | 0           |
| RP3-449M8.9 | C3orf52  | -0.324465912 | 4.24E-12    |
| RP3-449M8.9 | FLRT3    | 0.281033397  | 2.43E-09    |
| RP3-449M8.9 | MST1R    | 0.477217553  | 0           |
| RP3-449M8.9 | SDC1     | 0.153511746  | 0.001268034 |
| RP3-449M8.9 | ST8SIA4  | 0.250643515  | 1.14E-07    |
| RP3-449M8.9 | UBTD1    | 0.510181353  | 0           |
| RP3-449M8.9 | EPHA2    | 0.382299577  | 1.37E-17    |
| RP3-449M8.9 | TMEM130  | 0.403167223  | 0           |
| RP3-449M8.9 | SPINK2   | 0.407147031  | 0           |
| RP3-449M8.9 | MMP16    | 0.369150566  | 1.32E-15    |
| RP3-449M8.9 | SIGLEC15 | 0.5239214    | 0           |
| RP3-449M8.9 | RIN1     | 0.573870906  | 0           |
| RP3-449M8.9 | IL1RN    | 0.348193988  | 7.95E-14    |
| RP3-449M8.9 | FCER1G   | 0.222660751  | 2.62E-06    |
| RP3-449M8.9 | CD276    | 0.501843174  | 0           |
| RP3-449M8.9 | CTSB     | 0.440692931  | 0           |
| RP3-449M8.9 | FAM171A2 | 0.298694815  | 2.08E-10    |
| RP3-449M8.9 | ASPHD1   | 0.457844444  | 0           |
| RP3-449M8.9 | C15orf48 | 0.28564821   | 1.30E-09    |
| RP3-449M8.9 | DYSF     | 0.249239611  | 1.34E-07    |
| RP3-449M8.9 | PDZRN4   | 0.28487846   | 1.44E-09    |
| RP3-449M8.9 | EFHD2    | 0.413658348  | 0           |
| RP3-449M8.9 | ASF1B    | 0.250983499  | 1.09E-07    |
| RP3-449M8.9 | AQP1     | 0.233056987  | 8.52E-07    |

|             |          |             |             |
|-------------|----------|-------------|-------------|
| RP3-449M8.9 | ARRDC2   | 0.578906691 | 0           |
| RP3-449M8.9 | PRSS1    | 0.514395705 | 5.04E-31    |
| RP3-449M8.9 | MAPK13   | 0.424294999 | 0           |
| RP3-449M8.9 | CST5     | 0.425553145 | 9.76E-21    |
| RP3-449M8.9 | AHR      | 0.364896445 | 3.30E-15    |
| RP3-449M8.9 | BAX      | 0.3732281   | 4.99E-16    |
| RP3-449M8.9 | C1orf115 | 0.453171904 | 0           |
| RP3-449M8.9 | PLK3     | 0.52671474  | 0           |
| RP3-449M8.9 | JAG2     | 0.34472068  | 1.47E-13    |
| RP3-449M8.9 | RAD23B   | 0.537581308 | 0           |
| RP3-449M8.9 | CA12     | 0.016828266 | 0.7250269   |
| RP3-449M8.9 | ADTRP    | 0.440263023 | 0           |
| RP3-449M8.9 | UCP2     | 0.452905534 | 0           |
| RP3-449M8.9 | IGFBP2   | 0.289593977 | 7.54E-10    |
| RP3-449M8.9 | LOXL2    | 0.264160594 | 2.17E-08    |
| RP3-449M8.9 | GPX1     | 0.351391706 | 4.47E-14    |
| RP3-449M8.9 | P3H3     | 0.48225887  | 0           |
| RP3-449M8.9 | C2orf81  | 0.500857689 | 0           |
| RP3-449M8.9 | CDT1     | 0.325478629 | 3.61E-12    |
| RP3-449M8.9 | SNX25    | 0.395668152 | 0           |
| RP3-449M8.9 | MTHFD1L  | 0.389699929 | 0           |
| RP3-449M8.9 | CDC42BPG | 0.486389539 | 1.89E-27    |
| RP3-449M8.9 | MSN      | 0.453741664 | 0           |
| RP3-449M8.9 | SIGLEC6  | 0.401387926 | 2.01E-18    |
| RP3-449M8.9 | F2R      | 0.095269306 | 0.046077034 |
| RP3-449M8.9 | TMEM184A | 0.483172726 | 0           |
| RP3-449M8.9 | CKS2     | 0.243478045 | 2.63E-07    |
| RP3-449M8.9 | TAX1BP3  | 0.496600022 | 0           |
| RP3-449M8.9 | PMEP1    | 0.409183954 | 0           |
| RP3-449M8.9 | CXCL16   | 0.389445757 | 0           |
| RP3-449M8.9 | FAXC     | 0.469338642 | 0           |
| RP3-449M8.9 | VTCN1    | 0.363974419 | 3.38E-15    |
| RP3-449M8.9 | SH2D4A   | 0.44202081  | 0           |
| RP3-449M8.9 | RNF24    | 0.365229053 | 3.08E-15    |
| RP3-449M8.9 | LY6G6C   | 0.44947366  | 3.23E-23    |
| RP3-449M8.9 | NID1     | 0.25145071  | 1.03E-07    |
| RP3-449M8.9 | STAC     | 0.440267987 | 0           |
| RP3-449M8.9 | RAB34    | 0.602007705 | 0           |
| RP3-449M8.9 | HES4     | 0.427810857 | 0           |
| RP3-449M8.9 | EPHA10   | 0.50972719  | 0           |
| RP3-449M8.9 | ENTPD2   | 0.575046168 | 0           |
| RP3-449M8.9 | DDB2     | 0.375039076 | 3.09E-16    |
| RP3-449M8.9 | NKAIN4   | 0.350185381 | 5.57E-14    |
| RP3-449M8.9 | TRIM29   | 0.338157876 | 4.52E-13    |
| RP3-449M8.9 | ADCY8    | 0.473722244 | 6.12E-26    |
| RP3-449M8.9 | SFTA2    | 0.350628764 | 5.14E-14    |
| RP3-449M8.9 | NRIP1    | 0.359409901 | 9.93E-15    |
| RP3-449M8.9 | VWA1     | 0.265105087 | 1.93E-08    |
| RP3-449M8.9 | APLNR    | 0.09698355  | 0.042284752 |
| RP3-449M8.9 | REN      | 0.599216349 | 3.91E-44    |
| RP3-449M8.9 | EDIL3    | 0.197534445 | 3.18E-05    |

|             |          |             |             |
|-------------|----------|-------------|-------------|
| RP3-449M8.9 | AGRN     | 0.37103161  | 8.54E-16    |
| RP3-449M8.9 | TREM1    | 0.424222662 | 0           |
| RP3-449M8.9 | SRL      | 0.282017321 | 2.13E-09    |
| RP3-449M8.9 | RASGRF1  | 0.528151125 | 0           |
| RP3-449M8.9 | RMI2     | 0.400019006 | 0           |
| RP3-449M8.9 | SAMD1    | 0.485707781 | 0           |
| RP3-449M8.9 | MGAT4B   | 0.512088779 | 0           |
| RP3-449M8.9 | NXN      | 0.460299645 | 0           |
| RP3-449M8.9 | SH3BGRL3 | 0.46122882  | 0           |
| RP3-449M8.9 | CA11     | 0.472316654 | 0           |
| RP3-449M8.9 | PLD3     | 0.381828394 | 2.07E-17    |
| RP3-449M8.9 | LURAP1L  | 0.387447556 | 0           |
| RP3-449M8.9 | CARNS1   | 0.359312317 | 1.01E-14    |
| RP3-449M8.9 | PDLIM7   | 0.519457076 | 0           |
| RP3-449M8.9 | BCL2L1   | 0.445121512 | 0           |
| RP3-449M8.9 | GGT6     | 0.397236162 | 0           |
| RP3-449M8.9 | DPYSL3   | 0.297865635 | 2.35E-10    |
| RP3-449M8.9 | FYN      | 0.457340213 | 0           |
| RP3-449M8.9 | TK1      | 0.241246663 | 3.40E-07    |
| RP3-449M8.9 | AK1      | 0.424244646 | 0           |
| RP3-449M8.9 | HIGD1B   | 0.281430825 | 2.30E-09    |
| RP3-449M8.9 | TMEM59L  | 0.29990043  | 1.75E-10    |
| RP3-449M8.9 | MEGF9    | 0.350318566 | 5.43E-14    |
| RP3-449M8.9 | ZFP36L1  | 0.428803434 | 0           |
| RP3-449M8.9 | ADRA1B   | 0.407921604 | 0           |
| RP3-449M8.9 | EPHA4    | 0.401907284 | 0           |
| RP3-449M8.9 | TCERG1L  | 0.339597381 | 3.54E-13    |
| RP3-449M8.9 | NGFR     | 0.406199985 | 0           |
| RP3-449M8.9 | EBI3     | 0.391079295 | 0           |
| RP3-449M8.9 | S100A10  | 0.346164582 | 1.14E-13    |
| RP3-449M8.9 | S100B    | 0.383067058 | 4.20E-18    |
| RP3-449M8.9 | CD44     | 0.386218253 | 0           |
| RP3-449M8.9 | BHLHE41  | 0.483223362 | 0           |
| RP3-449M8.9 | FBXO2    | 0.488134473 | 0           |
| RP3-449M8.9 | SLC30A2  | 0.150049359 | 0.001633938 |
| RP3-449M8.9 | FRMD5    | 0.415195296 | 0           |
| RP3-449M8.9 | SAMD11   | 0.299059194 | 1.98E-10    |
| RP3-449M8.9 | SIP1L2   | 0.427308187 | 0           |
| RP3-449M8.9 | S100A16  | 0.513884437 | 0           |
| RP3-449M8.9 | PPL      | 0.39896388  | 0           |
| RP3-449M8.9 | ARHGD1B  | 0.256258422 | 5.78E-08    |
| RP3-449M8.9 | CDC42EP3 | 0.352954326 | 3.36E-14    |
| RP3-449M8.9 | RUNX2    | 0.547622242 | 0           |
| RP3-449M8.9 | LAMC2    | 0.335017318 | 7.65E-13    |
| RP3-449M8.9 | BRINP1   | 0.473788214 | 0           |
| RP3-449M8.9 | GPRC5B   | 0.472890102 | 0           |
| RP3-449M8.9 | AQP5     | 0.325943997 | 3.35E-12    |
| RP3-449M8.9 | PLAG1    | 0.460886851 | 0           |
| RP3-449M8.9 | PTPRU    | 0.369502322 | 1.22E-15    |
| RP3-449M8.9 | ANGPTL4  | 0.424507187 | 0           |
| RP3-449M8.9 | PALM3    | 0.446746398 | 0           |

|             |          |             |             |
|-------------|----------|-------------|-------------|
| RP3-449M8.9 | ACP5     | 0.277625193 | 3.82E-09    |
| RP3-449M8.9 | DLG4     | 0.467463413 | 0           |
| RP3-449M8.9 | ETNK2    | 0.553382674 | 0           |
| RP3-449M8.9 | CD109    | 0.415618821 | 0           |
| RP3-449M8.9 | SNX22    | 0.580907587 | 0           |
| RP3-449M8.9 | TMEM98   | 0.48508696  | 0           |
| RP3-449M8.9 | CTHRC1   | 0.254158239 | 7.45E-08    |
| RP3-449M8.9 | S100A2   | 0.453316436 | 0           |
| RP3-449M8.9 | C11orf80 | 0.567525538 | 0           |
| RP3-449M8.9 | SREBF1   | 0.480675116 | 0           |
| RP3-449M8.9 | PRSS22   | 0.55024169  | 0           |
| RP3-449M8.9 | CMTM3    | 0.442007194 | 0           |
| RP3-449M8.9 | RDH5     | 0.616144895 | 0           |
| RP3-449M8.9 | MYH10    | 0.396449675 | 0           |
| RP3-449M8.9 | EVPL     | 0.417423415 | 0           |
| RP3-449M8.9 | SCD      | 0.293688106 | 4.25E-10    |
| RP3-449M8.9 | CD151    | 0.545463623 | 0           |
| RP3-449M8.9 | S100A4   | 0.424369038 | 0           |
| RP3-449M8.9 | BNIP1    | 0.558874182 | 0           |
| RP3-449M8.9 | MAP3K6   | 0.555905673 | 0           |
| RP3-449M8.9 | MANEAL   | 0.383941626 | 0           |
| RP3-449M8.9 | CD207    | 0.474807935 | 4.57E-26    |
| RP3-449M8.9 | CD1A     | 0.445191818 | 9.29E-23    |
| RP3-449M8.9 | C3       | 0.283274282 | 1.79E-09    |
| RP3-449M8.9 | NT5E     | 0.36767546  | 1.83E-15    |
| RP3-449M8.9 | CACNG4   | 0.37474503  | 4.38E-16    |
| RP3-449M8.9 | FHOD1    | 0.609186082 | 0           |
| RP3-449M8.9 | LEMD1    | 0.535552186 | 0           |
| RP3-449M8.9 | ATP11A   | 0.321725761 | 6.54E-12    |
| RP3-449M8.9 | PPAP2C   | 0.428106162 | 0           |
| RP3-449M8.9 | DRAM1    | 0.396421875 | 0           |
| RP3-449M8.9 | CDA      | 0.304644173 | 8.77E-11    |
| RP3-449M8.9 | CCND2    | 0.398095695 | 0           |
| RP3-449M8.9 | LCN6     | 0.391032148 | 1.73E-17    |
| RP3-449M8.9 | CDH4     | 0.388034478 | 0           |
| RP3-449M8.9 | MMP11    | 0.40540981  | 0           |
| RP3-449M8.9 | B3GAT1   | 0.334959307 | 7.72E-13    |
| RP3-449M8.9 | SPP1     | 0.19862886  | 2.87E-05    |
| RP3-449M8.9 | HLA-DQB1 | 0.264574758 | 2.06E-08    |
| RP3-449M8.9 | SDC3     | 0.475668266 | 0           |
| RP3-449M8.9 | CX3CL1   | 0.331381182 | 1.39E-12    |
| RP3-449M8.9 | SDK1     | 0.403097723 | 0           |
| RP3-449M8.9 | DOCK9    | 0.434689249 | 0           |
| RP3-449M8.9 | CSF2     | 0.561474629 | 7.82E-38    |
| RP3-449M8.9 | GRHL3    | 0.512182391 | 0           |
| RP3-449M8.9 | TMEM92   | 0.528884975 | 5.24E-33    |
| RP3-449M8.9 | BASP1    | 0.493038917 | 0           |
| RP3-449M8.9 | HRH1     | 0.420221294 | 0           |
| RP3-449M8.9 | ESM1     | 0.118520242 | 0.012996428 |
| RP3-449M8.9 | B4GALNT3 | 0.442611704 | 0           |
| RP3-449M8.9 | LMO3     | 0.42712777  | 0           |

|             |          |             |          |
|-------------|----------|-------------|----------|
| RP3-449M8.9 | C9orf16  | 0.49099703  | 0        |
| RP3-449M8.9 | SEMA3F   | 0.352420592 | 3.71E-14 |
| RP3-449M8.9 | PLA2G12B | 0.471055597 | 1.25E-25 |
| RP3-449M8.9 | KLK6     | 0.483347832 | 4.41E-27 |
| RP3-449M8.9 | ST3GAL5  | 0.578451536 | 0        |
| RP3-449M8.9 | FAM132B  | 0.286153859 | 1.21E-09 |
| RP3-449M8.9 | CDKN1A   | 0.190627261 | 6.01E-05 |
| RP3-449M8.9 | E2F1     | 0.320766091 | 7.61E-12 |
| RP3-449M8.9 | B3GNT8   | 0.461152654 | 0        |
| RP3-449M8.9 | MTMR11   | 0.498511845 | 0        |
| RP3-449M8.9 | MYO1G    | 0.339779358 | 3.43E-13 |
| RP3-449M8.9 | TMSB10   | 0.519221626 | 0        |
| RP3-449M8.9 | UNC5CL   | 0.553176726 | 0        |
| RP3-449M8.9 | ABR      | 0.346407265 | 1.09E-13 |
| RP3-449M8.9 | PLP2     | 0.490049416 | 0        |
| RP3-449M8.9 | SRCIN1   | 0.437909945 | 0        |
| RP3-449M8.9 | PDE9A    | 0.559690455 | 0        |
| RP3-449M8.9 | TREM2    | 0.261021312 | 3.22E-08 |
| RP3-449M8.9 | KDELR3   | 0.296491942 | 2.86E-10 |
| RP3-449M8.9 | PC       | 0.515052182 | 0        |
| RP3-449M8.9 | C2CD4A   | 0.476808494 | 0        |
| RP3-449M8.9 | PELI1    | 0.459232321 | 0        |
| RP3-449M8.9 | SSX1     | 0.315608467 | 1.69E-11 |
| RP3-449M8.9 | MROH6    | 0.582615732 | 0        |
| RP3-449M8.9 | ESPN     | 0.574857525 | 0        |
| RP3-449M8.9 | BMP1     | 0.578192257 | 0        |
| RP3-449M8.9 | TM4SF4   | 0.476644585 | 2.78E-26 |
| RP3-449M8.9 | CORO2A   | 0.479467515 | 0        |
| RP3-449M8.9 | CD164L2  | 0.524200128 | 2.35E-32 |
| RP3-449M8.9 | CTSS     | 0.245389726 | 2.11E-07 |
| RP3-449M8.9 | CLU      | 0.533571005 | 0        |
| RP3-449M8.9 | TMSB4X   | 0.433086915 | 0        |
| RP3-449M8.9 | WNT10A   | 0.450021646 | 2.82E-23 |
| RP3-449M8.9 | NAPSA    | 0.402991203 | 0        |
| RP3-449M8.9 | PLEKHA4  | 0.554948839 | 0        |
| RP3-449M8.9 | SFTPA1   | 0.198837466 | 2.71E-05 |
| RP3-449M8.9 | C1orf116 | 0.47070042  | 0        |
| RP3-449M8.9 | TM4SF1   | 0.416705861 | 0        |
| RP3-449M8.9 | SEL1L3   | 0.314709645 | 1.94E-11 |
| RP3-449M8.9 | VASN     | 0.584633649 | 0        |
| RP3-449M8.9 | NPTXR    | 0.496000051 | 0        |
| RP3-449M8.9 | PDE4C    | 0.469008019 | 0        |
| RP3-449M8.9 | CDC42EP1 | 0.557997628 | 0        |
| RP3-449M8.9 | ENDOD1   | 0.518731437 | 0        |
| RP3-449M8.9 | RYR1     | 0.489062655 | 0        |
| RP3-449M8.9 | IL1RAP   | 0.46671735  | 0        |
| RP3-449M8.9 | SLC35F2  | 0.522425675 | 4.12E-32 |
| RP3-449M8.9 | ISYNA1   | 0.56730257  | 0        |
| RP3-449M8.9 | HLA-G    | 0.307987558 | 5.35E-11 |
| RP3-449M8.9 | CDKN2B   | 0.374253015 | 3.82E-16 |
| RP3-449M8.9 | ALDH1A3  | 0.30139823  | 1.41E-10 |

|             |          |             |          |
|-------------|----------|-------------|----------|
| RP3-449M8.9 | CLIP3    | 0.399665832 | 0        |
| RP3-449M8.9 | ULBP2    | 0.371002108 | 8.60E-16 |
| RP3-449M8.9 | ETHE1    | 0.515013602 | 0        |
| RP3-449M8.9 | XPR1     | 0.371740512 | 7.21E-16 |
| RP3-449M8.9 | SPTBN2   | 0.469552249 | 0        |
| RP3-449M8.9 | IVL      | 0.466247995 | 4.46E-25 |
| RP3-449M8.9 | MARCO    | 0.287334653 | 1.03E-09 |
| RP3-449M8.9 | PLXND1   | 0.341290916 | 2.65E-13 |
| RP3-449M8.9 | EMILIN2  | 0.4376301   | 0        |
| RP3-449M8.9 | PLAUR    | 0.416617496 | 0        |
| RP3-449M8.9 | CDC42EP5 | 0.577626895 | 0        |
| RP3-449M8.9 | TRPC5    | 0.457003167 | 4.87E-24 |
| RP3-449M8.9 | TMEM100  | 0.397952723 | 0        |
| RP3-449M8.9 | QSOX1    | 0.488072348 | 0        |
| RP3-449M8.9 | ARHGAP23 | 0.458069114 | 0        |
| RP3-449M8.9 | MDFI     | 0.363887841 | 4.07E-15 |
| RP3-449M8.9 | FSTL3    | 0.548905868 | 0        |
| RP3-449M8.9 | INF2     | 0.585322835 | 0        |
| RP3-449M8.9 | TGFBR1   | 0.548885586 | 0        |
| RP3-449M8.9 | TGFBI    | 0.281130697 | 2.39E-09 |
| RP3-449M8.9 | ERBB3    | 0.52515056  | 0        |
| RP3-449M8.9 | CCL18    | 0.252849366 | 8.72E-08 |
| RP3-449M8.9 | CCL17    | 0.424261824 | 1.31E-20 |
| RP3-449M8.9 | C16orf45 | 0.435266952 | 0        |
| RP3-449M8.9 | PRDM1    | 0.394057024 | 0        |
| RP3-449M8.9 | TRIM47   | 0.494582389 | 0        |
| RP3-449M8.9 | CNFN     | 0.443865119 | 0        |
| RP3-449M8.9 | ARMCX3   | 0.510569561 | 0        |
| RP3-449M8.9 | RAMP1    | 0.476202566 | 0        |
| RP3-449M8.9 | GABRD    | 0.268390461 | 1.27E-08 |
| RP3-449M8.9 | COL13A1  | 0.423858282 | 0        |
| RP3-449M8.9 | S100A5   | 0.47827665  | 0        |
| RP3-449M8.9 | MISP     | 0.339507173 | 3.60E-13 |
| RP3-449M8.9 | HES6     | 0.368055016 | 1.68E-15 |
| RP3-449M8.9 | PSD3     | 0.461005143 | 0        |
| RP3-449M8.9 | DOK7     | 0.478118644 | 0        |
| RP3-449M8.9 | ZMAT3    | 0.278801022 | 3.27E-09 |
| RP3-449M8.9 | MFAP2    | 0.442082793 | 0        |
| RP3-449M8.9 | TMEM79   | 0.574354854 | 0        |
| RP3-449M8.9 | SLC1A5   | 0.420478871 | 0        |
| RP3-449M8.9 | BBC3     | 0.418727466 | 0        |
| RP3-449M8.9 | HLA-DQB2 | 0.309540675 | 4.24E-11 |
| RP3-449M8.9 | C1QL1    | 0.493634491 | 0        |
| RP3-449M8.9 | TMEM215  | 0.337301988 | 3.84E-13 |
| RP3-449M8.9 | PNP      | 0.439849568 | 0        |
| RP3-449M8.9 | ARNTL    | 0.504726439 | 0        |
| RP3-449M8.9 | CLDN2    | 0.452732508 | 1.43E-23 |
| RP3-449M8.9 | MVP      | 0.544933152 | 0        |
| RP3-449M8.9 | LGALS1   | 0.470445113 | 0        |
| RP3-449M8.9 | BIRC7    | 0.501818708 | 2.23E-29 |
| RP3-449M8.9 | COL8A1   | 0.511380019 | 0        |

|             |           |             |          |
|-------------|-----------|-------------|----------|
| RP3-449M8.9 | PERP      | 0.451218806 | 0        |
| RP3-449M8.9 | GJA4      | 0.311935169 | 2.96E-11 |
| RP3-449M8.9 | IGFL2     | 0.452063336 | 1.69E-23 |
| RP3-449M8.9 | DAPK2     | 0.524233441 | 0        |
| RP3-449M8.9 | MAMLD1    | 0.551042219 | 0        |
| RP3-449M8.9 | ETV5      | 0.388499136 | 0        |
| RP3-449M8.9 | RUNX1     | 0.460046182 | 0        |
| RP3-449M8.9 | LONRF2    | 0.428365157 | 0        |
| RP3-449M8.9 | SPOCK1    | 0.285503678 | 1.32E-09 |
| RP3-449M8.9 | XKRX      | 0.482327803 | 0        |
| RP3-449M8.9 | TGFB1     | 0.346535203 | 1.07E-13 |
| RP3-449M8.9 | ERP27     | 0.330221379 | 1.68E-12 |
| RP3-449M8.9 | TNFRSF10C | 0.303482385 | 1.04E-10 |
| RP3-449M8.9 | PALM      | 0.595988846 | 0        |
| RP3-449M8.9 | TSC22D1   | 0.531467702 | 0        |
| RP3-449M8.9 | TGM2      | 0.266164752 | 1.69E-08 |
| RP3-449M8.9 | UBE2QL1   | 0.47375545  | 0        |
| RP3-449M8.9 | ECE1      | 0.552120181 | 0        |
| RP3-449M8.9 | COL8A2    | 0.515533293 | 0        |
| RP3-449M8.9 | HIST3H2A  | 0.41792098  | 0        |
| RP3-449M8.9 | TNFRSF21  | 0.406062686 | 0        |
| RP3-449M8.9 | SOX4      | 0.444503244 | 0        |
| RP3-449M8.9 | ELF3      | 0.500609474 | 0        |
| RP3-449M8.9 | TPD52L1   | 0.525032835 | 0        |
| RP3-449M8.9 | INHBB     | 0.516404741 | 0        |
| RP3-449M8.9 | HPN       | 0.456017582 | 0        |
| RP3-449M8.9 | MMP7      | 0.340112074 | 2.38E-13 |
| RP3-449M8.9 | RAB27A    | 0.53916109  | 0        |
| RP3-449M8.9 | IGF2BP2   | 0.55250073  | 0        |
| RP3-449M8.9 | ITGB4     | 0.432965077 | 0        |
| RP3-449M8.9 | PPP1R1B   | 0.54257284  | 0        |
| RP3-449M8.9 | NPDC1     | 0.483509448 | 0        |
| RP3-449M8.9 | CCL13     | 0.423570148 | 1.54E-20 |
| RP3-449M8.9 | SPINT1    | 0.539122794 | 0        |
| RP3-449M8.9 | HEY2      | 0.50399768  | 0        |
| RP3-449M8.9 | CST2      | 0.372829738 | 6.34E-16 |
| RP3-449M8.9 | ADM       | 0.431954345 | 0        |
| RP3-449M8.9 | VSTM2L    | 0.328218214 | 2.33E-12 |
| RP3-449M8.9 | FAM84A    | 0.395961755 | 0        |
| RP3-449M8.9 | P4HA2     | 0.421927169 | 0        |
| RP3-449M8.9 | LPL       | 0.374698809 | 3.39E-16 |
| RP3-449M8.9 | TMEM173   | 0.414544547 | 0        |
| RP3-449M8.9 | DHRS3     | 0.585902382 | 0        |
| RP3-449M8.9 | SCN1B     | 0.517242289 | 0        |
| RP3-449M8.9 | GLT1D1    | 0.373252212 | 4.96E-16 |
| RP3-449M8.9 | PHYHIP    | 0.521120825 | 0        |
| RP3-449M8.9 | BHLHE40   | 0.489497244 | 0        |
| RP3-449M8.9 | BID       | 0.574875254 | 0        |
| RP3-449M8.9 | POSTN     | 0.220742546 | 3.20E-06 |
| RP3-449M8.9 | ITGA3     | 0.506663083 | 0        |
| RP3-449M8.9 | RSP04     | 0.46535699  | 0        |



|             |            |             |             |
|-------------|------------|-------------|-------------|
| RP3-449M8.9 | ADAMTS9    | 0.476618291 | 0           |
| RP3-449M8.9 | ABTB2      | 0.529951889 | 0           |
| RP3-449M8.9 | KCNQ3      | 0.463785009 | 0           |
| RP3-449M8.9 | ANXA1      | 0.602955886 | 0           |
| RP3-449M8.9 | S100A11    | 0.533139962 | 0           |
| RP3-449M8.9 | CEACAM6    | 0.367754751 | 1.66E-15    |
| RP3-449M8.9 | IER5L      | 0.576360998 | 0           |
| RP3-449M8.9 | KRT80      | 0.396684983 | 0           |
| RP3-449M8.9 | CDH6       | 0.402557182 | 0           |
| RP3-449M8.9 | UNC5B      | 0.309156438 | 4.49E-11    |
| RP3-449M8.9 | PLEKHN1    | 0.599479032 | 0           |
| RP3-449M8.9 | SYTL1      | 0.478484726 | 0           |
| RP3-449M8.9 | TMEM163    | 0.405734333 | 0           |
| RP3-449M8.9 | C4orf48    | 0.39048358  | 0           |
| RP3-449M8.9 | B3GNT7     | 0.510175963 | 0           |
| RP3-449M8.9 | BAIAP3     | 0.538376447 | 0           |
| RP3-449M8.9 | PHLDA2     | 0.556535288 | 0           |
| RP3-449M8.9 | GAP43      | 0.493323204 | 2.64E-28    |
| RP3-449M8.9 | S100A1     | 0.405860852 | 0           |
| RP3-449M8.9 | PTPRE      | 0.508732061 | 0           |
| RP3-449M8.9 | CCND1      | 0.356998102 | 1.58E-14    |
| RP3-449M8.9 | ST6GALNAC5 | 0.420625119 | 3.00E-20    |
| RP3-449M8.9 | KRT17      | 0.375311687 | 2.87E-16    |
| RP3-449M8.9 | HPCAL4     | 0.537451669 | 0           |
| RP3-449M8.9 | GABBR2     | 0.461960274 | 0           |
| RP3-449M8.9 | DIRAS3     | 0.486939211 | 0           |
| RP3-449M8.9 | SERINC2    | 0.446553925 | 0           |
| RP3-449M8.9 | PTCHD4     | 0.312721372 | 2.63E-11    |
| RP3-449M8.9 | EPS8       | 0.476669778 | 0           |
| RP3-449M8.9 | LY6E       | 0.559508194 | 0           |
| RP3-449M8.9 | UPP1       | 0.547456009 | 0           |
| RP3-449M8.9 | AHNAK2     | 0.40707285  | 0           |
| RP3-449M8.9 | PLXNC1     | 0.492289308 | 0           |
| RP3-449M8.9 | TNC        | 0.333805604 | 9.35E-13    |
| RP3-449M8.9 | DUSP4      | 0.426986925 | 0           |
| RP3-449M8.9 | NRCAM      | 0.455276767 | 0           |
| RP3-449M8.9 | NRP2       | 0.538431622 | 0           |
| RP3-449M8.9 | CTSC       | 0.533809859 | 0           |
| RP3-449M8.9 | AMIGO2     | 0.523955724 | 0           |
| RP3-449M8.9 | NAB2       | 0.590507976 | 0           |
| RP3-449M8.9 | TBC1D2     | 0.505045005 | 0           |
| RP3-449M8.9 | PHLDA3     | 0.424673846 | 0           |
| RP3-449M8.9 | PTP4A3     | 0.473348945 | 0           |
| RP3-449M8.9 | CRABP2     | 0.427217269 | 0           |
| RP3-449M8.9 | GOS2       | 0.476436456 | 0           |
| RP3-449M8.9 | S100A6     | 0.554249724 | 0           |
| RP3-449M8.9 | FOXQ1      | 0.45071259  | 0           |
| RP3-449M8.9 | LRG1       | 0.538225249 | 0           |
| RP3-449M8.9 | LAMP5      | 0.343681014 | 1.76E-13    |
| RP3-449M8.9 | ALDH3B1    | 0.455689938 | 0           |
| RP3-449M8.9 | CDH2       | 0.175250555 | 0.000228998 |

|             |         |             |          |
|-------------|---------|-------------|----------|
| RP3-449M8.9 | SCG5    | 0.396617894 | 0        |
| RP3-449M8.9 | ZCCHC16 | 0.518229844 | 1.54E-31 |
| RP3-449M8.9 | GRB7    | 0.61751873  | 0        |
| RP3-449M8.9 | TIAM1   | 0.397666779 | 0        |
| RP3-449M8.9 | FXYD5   | 0.454832391 | 0        |
| RP3-449M8.9 | CLDN9   | 0.485342835 | 0        |
| RP3-449M8.9 | FAM43A  | 0.547990877 | 0        |
| RP3-449M8.9 | CHST2   | 0.493717041 | 0        |
| RP3-449M8.9 | HMGA2   | 0.526126967 | 0        |
| RP3-449M8.9 | GALNT7  | 0.541790325 | 0        |
| RP3-449M8.9 | CBLN1   | 0.423112077 | 0        |
| RP3-449M8.9 | STRA6   | 0.485861817 | 0        |
| RP3-449M8.9 | MUC21   | 0.507383439 | 4.25E-30 |
| RP3-449M8.9 | PRR36   | 0.602209539 | 0        |
| RP3-449M8.9 | NFE2L3  | 0.372148435 | 6.53E-16 |
| RP3-449M8.9 | NR1D1   | 0.455386549 | 0        |
| RP3-449M8.9 | MUC1    | 0.405984534 | 0        |
| RP3-449M8.9 | NAT8L   | 0.441639127 | 0        |
| RP3-449M8.9 | APOC1   | 0.370851051 | 8.91E-16 |
| RP3-449M8.9 | EVA1A   | 0.522204177 | 0        |
| RP3-449M8.9 | ENTPD1  | 0.38155479  | 2.52E-17 |
| RP3-449M8.9 | COL1A1  | 0.340475069 | 3.05E-13 |
| RP3-449M8.9 | FNDC4   | 0.463017528 | 0        |
| RP3-449M8.9 | FRMD3   | 0.365794699 | 2.73E-15 |
| RP3-449M8.9 | SHROOM4 | 0.535502969 | 0        |
| RP3-449M8.9 | NELL2   | 0.450562242 | 0        |
| RP3-449M8.9 | EPHB3   | 0.516206594 | 0        |
| RP3-449M8.9 | TMC6    | 0.547915136 | 0        |
| RP3-449M8.9 | NOD1    | 0.603938108 | 0        |
| RP3-449M8.9 | GGCT    | 0.671348616 | 0        |
| RP3-449M8.9 | ICAM1   | 0.470363557 | 0        |
| RP3-449M8.9 | PRSS23  | 0.475438064 | 0        |
| RP3-449M8.9 | CFI     | 0.465962209 | 0        |
| RP3-449M8.9 | CD55    | 0.464927507 | 0        |
| RP3-449M8.9 | RASD2   | 0.515960649 | 0        |
| RP3-449M8.9 | KLK11   | 0.467084681 | 3.58E-25 |
| RP3-449M8.9 | ICAM5   | 0.6289491   | 0        |
| RP3-449M8.9 | ADORA1  | 0.484668115 | 0        |
| RP3-449M8.9 | ITGA2   | 0.413528142 | 0        |
| RP3-449M8.9 | ABCC3   | 0.491125109 | 0        |
| RP3-449M8.9 | MFGE8   | 0.541716286 | 0        |
| RP3-449M8.9 | STK32A  | 0.454325607 | 0        |
| RP3-449M8.9 | CYSLTR2 | 0.443606266 | 0        |
| RP3-449M8.9 | LAD1    | 0.568543361 | 0        |
| RP3-449M8.9 | MGAT3   | 0.380318538 | 5.04E-17 |
| RP3-449M8.9 | IGFBP6  | 0.582110366 | 0        |
| RP3-449M8.9 | CYP2S1  | 0.416382189 | 0        |
| RP3-449M8.9 | KCNJ2   | 0.482860259 | 0        |
| RP3-449M8.9 | FAM20A  | 0.4693802   | 0        |
| RP3-449M8.9 | TGFA    | 0.534676342 | 0        |
| RP3-449M8.9 | MXRA8   | 0.585498146 | 0        |

|             |           |             |          |
|-------------|-----------|-------------|----------|
| RP3-449M8.9 | C8orf4    | 0.383915811 | 0        |
| RP3-449M8.9 | CLDN10    | 0.544415761 | 3.06E-35 |
| RP3-449M8.9 | PDE5A     | 0.530303929 | 0        |
| RP3-449M8.9 | APOE      | 0.405786388 | 0        |
| RP3-449M8.9 | SPOCK2    | 0.377292584 | 1.59E-16 |
| RP3-449M8.9 | TENM1     | 0.50606453  | 0        |
| RP3-449M8.9 | SLIT1     | 0.382948482 | 5.52E-18 |
| RP3-449M8.9 | CXCL14    | 0.327910994 | 2.45E-12 |
| RP3-449M8.9 | ECM1      | 0.299834051 | 1.77E-10 |
| RP3-449M8.9 | DUSP5     | 0.546906107 | 0        |
| RP3-449M8.9 | SEZ6L2    | 0.378397638 | 1.10E-16 |
| RP3-449M8.9 | THRSP     | 0.323572197 | 4.89E-12 |
| RP3-449M8.9 | C19orf33  | 0.454417234 | 0        |
| RP3-449M8.9 | MPZL2     | 0.561910773 | 0        |
| RP3-449M8.9 | CTSH      | 0.614980554 | 0        |
| RP3-449M8.9 | CYP1B1    | 0.541342971 | 0        |
| RP3-449M8.9 | ALOX5     | 0.370725809 | 9.17E-16 |
| RP3-449M8.9 | SYTL5     | 0.485590854 | 2.36E-27 |
| RP3-449M8.9 | TNFRSF12A | 0.617444691 | 0        |
| RP3-449M8.9 | DUSP6     | 0.546244011 | 0        |
| RP3-449M8.9 | ALOX15B   | 0.512872571 | 0        |
| RP3-449M8.9 | SDC4      | 0.685776572 | 0        |
| RP3-449M8.9 | MDK       | 0.557129302 | 0        |
| RP3-449M8.9 | KRT19     | 0.484454509 | 0        |
| RP3-449M8.9 | MET       | 0.511403564 | 0        |
| RP3-449M8.9 | TESC      | 0.5428924   | 0        |
| RP3-449M8.9 | CXCL17    | 0.538236118 | 2.45E-34 |
| RP3-449M8.9 | NPC2      | 0.66071849  | 0        |
| RP3-449M8.9 | COMP      | 0.395150021 | 0        |
| RP3-449M8.9 | TUSC3     | 0.470944238 | 0        |
| RP3-449M8.9 | TMPRSS4   | 0.475055246 | 0        |
| RP3-449M8.9 | LGALS3    | 0.56944431  | 0        |
| RP3-449M8.9 | CRLF1     | 0.342404338 | 2.19E-13 |
| RP3-449M8.9 | CTXN1     | 0.562667049 | 0        |
| RP3-449M8.9 | PCSK1N    | 0.304585594 | 8.85E-11 |
| RP3-449M8.9 | NMU       | 0.446671004 | 6.46E-23 |
| RP3-449M8.9 | GALE      | 0.643115084 | 0        |
| RP3-449M8.9 | PCSK2     | 0.281463305 | 2.29E-09 |
| RP3-449M8.9 | GJB3      | 0.581412953 | 0        |
| RP3-449M8.9 | SLPI      | 0.394810179 | 0        |
| RP3-449M8.9 | AGR2      | 0.306247784 | 6.93E-11 |
| RP3-449M8.9 | MRC2      | 0.465358834 | 0        |
| RP3-449M8.9 | GOLT1A    | 0.593511802 | 0        |
| RP3-449M8.9 | SLC27A6   | 0.47485591  | 4.51E-26 |
| RP3-449M8.9 | KCNN4     | 0.531412386 | 0        |
| RP3-449M8.9 | ETV4      | 0.495562714 | 1.39E-28 |
| RP3-449M8.9 | SYT12     | 0.632147386 | 0        |
| RP3-449M8.9 | PVRL4     | 0.607907704 | 0        |
| RP3-449M8.9 | PLCD3     | 0.548544467 | 0        |
| RP3-449M8.9 | PLAU      | 0.480739085 | 0        |
| RP3-449M8.9 | LRRK2     | 0.42297875  | 0        |

|              |          |              |          |
|--------------|----------|--------------|----------|
| RP3-449M8.9  | SFN      | 0.495234698  | 0        |
| RP3-449M8.9  | LPAR5    | 0.558572494  | 0        |
| RP3-449M8.9  | NGEF     | 0.513267445  | 0        |
| RP3-449M8.9  | DTX4     | 0.525617772  | 0        |
| RP3-449M8.9  | CST6     | 0.56337822   | 0        |
| RP3-449M8.9  | QPCT     | 0.541770326  | 0        |
| RP3-449M8.9  | TIMP1    | 0.599156211  | 0        |
| RP3-449M8.9  | CAMK2N1  | 0.608103155  | 0        |
| RP3-449M8.9  | KLHDC8A  | 0.370408377  | 9.88E-16 |
| RP3-449M8.9  | PDLIM4   | 0.659021976  | 0        |
| RP3-449M8.9  | SCEL     | 0.476858421  | 0        |
| RP3-449M8.9  | LCN2     | 0.453343243  | 0        |
| RP3-449M8.9  | PROS1    | 0.50006255   | 0        |
| RP3-449M8.9  | GABRB2   | 0.545759353  | 0        |
| RP3-449M8.9  | TMPRSS6  | 0.524233158  | 0        |
| RP3-449M8.9  | KLK7     | 0.488740237  | 9.74E-28 |
| RP3-449M8.9  | PDZK1IP1 | 0.456553868  | 0        |
| RP3-449M8.9  | CDH3     | 0.521969295  | 0        |
| RP3-449M8.9  | LRP4     | 0.468520951  | 0        |
| RP3-449M8.9  | IGSF1    | 0.317502844  | 1.26E-11 |
| RP3-449M8.9  | B3GNT3   | 0.450782515  | 0        |
| RP3-449M8.9  | CLDN1    | 0.459260688  | 0        |
| RP3-449M8.9  | GDF15    | 0.482450634  | 0        |
| RP3-449M8.9  | ARHGAP36 | 0.346990842  | 7.25E-14 |
| RP3-449M8.9  | LAMB3    | 0.465209054  | 0        |
| RP3-449M8.9  | KLK10    | 0.561216197  | 0        |
| RP3-449M8.9  | DPP4     | 0.479056613  | 0        |
| RP3-449M8.9  | METTL7B  | 0.594883793  | 0        |
| RP3-449M8.9  | LIPH     | 0.533415552  | 0        |
| RP3-449M8.9  | CLDN16   | 0.486093578  | 0        |
| RP3-449M8.9  | CHI3L1   | 0.521441945  | 0        |
| RP3-449M8.9  | SLC22A31 | 0.630526198  | 4.91E-50 |
| RP3-449M8.9  | TACSTD2  | 0.585508642  | 0        |
| RP3-449M8.9  | SFTPB    | 0.51168667   | 0        |
| RP3-449M8.9  | RXRG     | 0.560073699  | 0        |
| RP3-449M8.9  | DCSTAMP  | 0.547798162  | 9.62E-36 |
| RP3-449M8.9  | CITED1   | 0.594406085  | 0        |
| RP3-449M8.9  | SERPINA1 | 0.58348179   | 0        |
| RP3-449M8.9  | PRR15    | 0.550293461  | 0        |
| RP3-449M8.9  | SLC34A2  | 0.512574287  | 0        |
| RP3-449M8.9  | FN1      | 0.463413821  | 0        |
| RP3-449M8.9  | ZCCHC12  | 0.47688849   | 0        |
| RP11-320N7.2 | TFF3     | -0.463860418 | 8.33E-25 |
| RP11-320N7.2 | CCL21    | -0.344339773 | 1.15E-13 |
| RP11-320N7.2 | TPO      | -0.475916791 | 3.39E-26 |
| RP11-320N7.2 | MT1G     | -0.329926333 | 1.32E-12 |
| RP11-320N7.2 | DIO1     | -0.493447654 | 2.55E-28 |
| RP11-320N7.2 | DPT      | -0.313250221 | 1.89E-11 |
| RP11-320N7.2 | CDH16    | -0.438447379 | 4.75E-22 |
| RP11-320N7.2 | CRABP1   | -0.270781272 | 8.15E-09 |
| RP11-320N7.2 | SLC26A7  | -0.413864726 | 1.35E-19 |

|              |           |              |          |
|--------------|-----------|--------------|----------|
| RP11-320N7.2 | MT1H      | -0.287573295 | 8.34E-10 |
| RP11-320N7.2 | SLC26A4   | -0.388947125 | 2.64E-17 |
| RP11-320N7.2 | SLC5A8    | -0.333309221 | 7.51E-13 |
| RP11-320N7.2 | PKHD1L1   | -0.541508382 | 8.18E-35 |
| RP11-320N7.2 | TFCP2L1   | -0.455226434 | 7.64E-24 |
| RP11-320N7.2 | WSCD2     | -0.459640211 | 2.48E-24 |
| RP11-320N7.2 | IPCEF1    | -0.503912685 | 1.20E-29 |
| RP11-320N7.2 | SLC5A5    | -0.373904613 | 5.16E-16 |
| RP11-320N7.2 | MT1F      | -0.382137096 | 1.03E-16 |
| RP11-320N7.2 | FOSB      | -0.343644826 | 1.30E-13 |
| RP11-320N7.2 | SEMA3D    | -0.549169758 | 6.00E-36 |
| RP11-320N7.2 | BMP8A     | -0.495996965 | 1.22E-28 |
| RP11-320N7.2 | MATN2     | -0.4898396   | 7.13E-28 |
| RP11-320N7.2 | PLA2R1    | -0.53687593  | 3.84E-34 |
| RP11-320N7.2 | COL23A1   | -0.277806346 | 3.20E-09 |
| RP11-320N7.2 | HGD       | -0.346339236 | 8.12E-14 |
| RP11-320N7.2 | TCEAL2    | -0.369153604 | 1.28E-15 |
| RP11-320N7.2 | CHRD1     | -0.364003722 | 3.36E-15 |
| RP11-320N7.2 | TNFRSF11B | -0.48814266  | 1.15E-27 |
| RP11-320N7.2 | FAM167A   | -0.460419377 | 2.03E-24 |
| RP11-320N7.2 | KIT       | -0.568127696 | 6.93E-39 |
| RP11-320N7.2 | SLC4A4    | -0.514656071 | 4.65E-31 |
| RP11-320N7.2 | SMOC2     | -0.366323456 | 2.18E-15 |
| RP11-320N7.2 | FHL1      | -0.519239753 | 1.12E-31 |
| RP11-320N7.2 | OTOS      | -0.296860257 | 2.21E-10 |
| RP11-320N7.2 | IGFBPL1   | -0.500686882 | 3.11E-29 |
| RP11-320N7.2 | HBB       | -0.342027385 | 1.72E-13 |
| RP11-320N7.2 | BEX1      | -0.43179018  | 2.30E-21 |
| RP11-320N7.2 | FABP4     | -0.432905436 | 1.77E-21 |
| RP11-320N7.2 | LMOD1     | -0.399551156 | 2.95E-18 |
| RP11-320N7.2 | SOD3      | -0.340004078 | 2.43E-13 |
| RP11-320N7.2 | TMEM171   | -0.367808279 | 1.65E-15 |
| RP11-320N7.2 | PI16      | -0.257114713 | 4.66E-08 |
| RP11-320N7.2 | ZMAT4     | -0.462037098 | 1.34E-24 |
| RP11-320N7.2 | MFAP4     | -0.235831263 | 5.80E-07 |
| RP11-320N7.2 | CWH43     | -0.434903167 | 1.11E-21 |
| RP11-320N7.2 | SPX       | -0.458041831 | 3.73E-24 |
| RP11-320N7.2 | APOD      | -0.25262592  | 8.08E-08 |
| RP11-320N7.2 | DPP6      | -0.496144617 | 1.17E-28 |
| RP11-320N7.2 | MMRN1     | -0.488753765 | 9.70E-28 |
| RP11-320N7.2 | WDR72     | -0.430069482 | 3.44E-21 |
| RP11-320N7.2 | MPPED2    | -0.459395951 | 2.64E-24 |
| RP11-320N7.2 | PAPSS2    | -0.490102708 | 6.62E-28 |
| RP11-320N7.2 | DCN       | -0.207493258 | 1.17E-05 |
| RP11-320N7.2 | SORBS2    | -0.480157297 | 1.06E-26 |
| RP11-320N7.2 | EGR2      | -0.380081095 | 1.55E-16 |
| RP11-320N7.2 | EDN3      | -0.317414536 | 9.86E-12 |
| RP11-320N7.2 | DIO2      | -0.43998766  | 3.29E-22 |
| RP11-320N7.2 | ITPR1     | -0.574821773 | 5.72E-40 |
| RP11-320N7.2 | CFD       | -0.198314123 | 2.85E-05 |
| RP11-320N7.2 | CPXM1     | -0.367186252 | 1.85E-15 |

|              |            |              |          |
|--------------|------------|--------------|----------|
| RP11-320N7.2 | ELMO1      | -0.534906379 | 7.37E-34 |
| RP11-320N7.2 | GPC3       | -0.451677046 | 1.87E-23 |
| RP11-320N7.2 | MYOC       | -0.297518601 | 2.01E-10 |
| RP11-320N7.2 | DEPTOR     | -0.556976315 | 3.90E-37 |
| RP11-320N7.2 | DGKI       | -0.594177229 | 3.03E-43 |
| RP11-320N7.2 | CARTPT     | -0.301707576 | 1.09E-10 |
| RP11-320N7.2 | IYD        | -0.329537061 | 1.40E-12 |
| RP11-320N7.2 | LYVE1      | -0.414834254 | 1.09E-19 |
| RP11-320N7.2 | CLCNKB     | -0.471299849 | 1.17E-25 |
| RP11-320N7.2 | NCAM1      | -0.375054528 | 4.13E-16 |
| RP11-320N7.2 | HBA2       | -0.275625458 | 4.29E-09 |
| RP11-320N7.2 | GLT8D2     | -0.371415766 | 8.31E-16 |
| RP11-320N7.2 | OGDHL      | -0.260412994 | 3.09E-08 |
| RP11-320N7.2 | LIFR       | -0.492984272 | 2.91E-28 |
| RP11-320N7.2 | CSGALNACT1 | -0.576512827 | 3.02E-40 |
| RP11-320N7.2 | RAP1GAP    | -0.331823973 | 9.62E-13 |
| RP11-320N7.2 | COL9A3     | -0.417594477 | 5.92E-20 |
| RP11-320N7.2 | FBLN1      | -0.210496022 | 8.68E-06 |
| RP11-320N7.2 | EFEMP1     | -0.498559466 | 5.80E-29 |
| RP11-320N7.2 | AOX1       | -0.469510022 | 1.89E-25 |
| RP11-320N7.2 | GRIN2C     | -0.398676234 | 3.55E-18 |
| RP11-320N7.2 | C11orf74   | -0.36282951  | 4.18E-15 |
| RP11-320N7.2 | PPARGC1A   | -0.353456554 | 2.30E-14 |
| RP11-320N7.2 | ANGPTL1    | -0.526850949 | 1.01E-32 |
| RP11-320N7.2 | SCARA5     | -0.303103933 | 8.82E-11 |
| RP11-320N7.2 | LTF        | -0.34660674  | 7.75E-14 |
| RP11-320N7.2 | CA4        | -0.378589386 | 2.08E-16 |
| RP11-320N7.2 | TG         | -0.38450755  | 6.44E-17 |
| RP11-320N7.2 | FCGBP      | -0.442438607 | 1.82E-22 |
| RP11-320N7.2 | PBX4       | -0.425579485 | 9.70E-21 |
| RP11-320N7.2 | CYR61      | -0.355336393 | 1.64E-14 |
| RP11-320N7.2 | FOS        | -0.34898074  | 5.11E-14 |
| RP11-320N7.2 | KHDRBS2    | -0.522518887 | 4.01E-32 |
| RP11-320N7.2 | MUM1L1     | -0.566202327 | 1.41E-38 |
| RP11-320N7.2 | RGS16      | -0.368789863 | 1.37E-15 |
| RP11-320N7.2 | MT1M       | -0.376581334 | 3.07E-16 |
| RP11-320N7.2 | LRP2       | -0.418647902 | 4.67E-20 |
| RP11-320N7.2 | MAFB       | -0.432764247 | 1.83E-21 |
| RP11-320N7.2 | KCNK2      | -0.535910231 | 5.29E-34 |
| RP11-320N7.2 | TBC1D4     | -0.461970012 | 1.36E-24 |
| RP11-320N7.2 | MIOX       | -0.405410323 | 8.51E-19 |
| RP11-320N7.2 | TPPP       | -0.450136181 | 2.74E-23 |
| RP11-320N7.2 | FMOD       | -0.437336227 | 6.20E-22 |
| RP11-320N7.2 | CITED2     | -0.52354905  | 2.89E-32 |
| RP11-320N7.2 | RGS8       | -0.491271491 | 4.75E-28 |
| RP11-320N7.2 | ABI3BP     | -0.292444652 | 4.18E-10 |
| RP11-320N7.2 | ADH1B      | -0.325770371 | 2.60E-12 |
| RP11-320N7.2 | OGN        | -0.251961889 | 8.76E-08 |
| RP11-320N7.2 | NR4A1      | -0.34191739  | 1.75E-13 |
| RP11-320N7.2 | FOXJ1      | -0.452523012 | 1.51E-23 |
| RP11-320N7.2 | ALDH1A1    | -0.414371936 | 1.21E-19 |

|              |          |              |             |
|--------------|----------|--------------|-------------|
| RP11-320N7.2 | OCA2     | -0.533634306 | 1.12E-33    |
| RP11-320N7.2 | TMEM139  | -0.322113019 | 4.68E-12    |
| RP11-320N7.2 | ARHGAP24 | -0.345944857 | 8.70E-14    |
| RP11-320N7.2 | SLC25A15 | -0.51162955  | 1.18E-30    |
| RP11-320N7.2 | DES      | -0.291620447 | 4.71E-10    |
| RP11-320N7.2 | GDF10    | -0.395910381 | 6.32E-18    |
| RP11-320N7.2 | KIAA1324 | -0.393662857 | 1.01E-17    |
| RP11-320N7.2 | JUN      | -0.349758008 | 4.45E-14    |
| RP11-320N7.2 | C7       | -0.158417735 | 0.000865926 |
| RP11-320N7.2 | LGI3     | -0.278252282 | 3.01E-09    |
| RP11-320N7.2 | CDON     | -0.476871143 | 2.61E-26    |
| RP11-320N7.2 | BCL2     | -0.57077381  | 2.60E-39    |
| RP11-320N7.2 | HLF      | -0.388550974 | 2.86E-17    |
| RP11-320N7.2 | EGR1     | -0.355717439 | 1.53E-14    |
| RP11-320N7.2 | IP6K3    | -0.407948414 | 4.93E-19    |
| RP11-320N7.2 | SCUBE3   | -0.547439041 | 1.09E-35    |
| RP11-320N7.2 | PKNOX2   | -0.546471073 | 1.52E-35    |
| RP11-320N7.2 | SMAD9    | -0.60057054  | 2.24E-44    |
| RP11-320N7.2 | IQGAP2   | -0.483693653 | 4.01E-27    |
| RP11-320N7.2 | GNA14    | -0.492208494 | 3.63E-28    |
| RP11-320N7.2 | LAYN     | -0.507063102 | 4.68E-30    |
| RP11-320N7.2 | AVPR1A   | -0.455039989 | 8.01E-24    |
| RP11-320N7.2 | PDLIM3   | -0.466075064 | 4.67E-25    |
| RP11-320N7.2 | GPM6A    | -0.357686848 | 1.07E-14    |
| RP11-320N7.2 | SDPR     | -0.360111271 | 6.89E-15    |
| RP11-320N7.2 | CRYAB    | -0.174993608 | 0.000229117 |
| RP11-320N7.2 | FOXA2    | -0.415277044 | 9.91E-20    |
| RP11-320N7.2 | C8orf88  | -0.48594624  | 2.14E-27    |
| RP11-320N7.2 | ISM1     | -0.405118975 | 9.06E-19    |
| RP11-320N7.2 | BMP2     | -0.408268895 | 4.60E-19    |
| RP11-320N7.2 | ID4      | -0.569499829 | 4.18E-39    |
| RP11-320N7.2 | NUPR1    | -0.039010969 | 0.414871671 |
| RP11-320N7.2 | SERTM1   | -0.410457912 | 2.86E-19    |
| RP11-320N7.2 | IRS1     | -0.446475364 | 6.78E-23    |
| RP11-320N7.2 | FIBIN    | -0.176593461 | 0.000200202 |
| RP11-320N7.2 | PODN     | -0.249461249 | 1.18E-07    |
| RP11-320N7.2 | TDRD9    | -0.31259929  | 2.09E-11    |
| RP11-320N7.2 | EPHA3    | -0.348689619 | 5.38E-14    |
| RP11-320N7.2 | AIF1L    | -0.498821227 | 5.37E-29    |
| RP11-320N7.2 | EBF4     | -0.456532471 | 5.49E-24    |
| RP11-320N7.2 | ADM2     | -0.393853273 | 9.67E-18    |
| RP11-320N7.2 | GSTM3    | -0.370386382 | 1.01E-15    |
| RP11-320N7.2 | HSD17B6  | -0.453210502 | 1.27E-23    |
| RP11-320N7.2 | AGR3     | -0.372945337 | 6.20E-16    |
| RP11-320N7.2 | EPHB1    | -0.3102538   | 3.00E-11    |
| RP11-320N7.2 | TMOD1    | -0.210740408 | 8.47E-06    |
| RP11-320N7.2 | WASF3    | -0.449143392 | 3.51E-23    |
| RP11-320N7.2 | SELV     | -0.465750566 | 5.08E-25    |
| RP11-320N7.2 | ENPP1    | -0.083301686 | 0.081260434 |
| RP11-320N7.2 | SYNE1    | -0.543550239 | 4.10E-35    |
| RP11-320N7.2 | PLCH1    | -0.385101564 | 5.72E-17    |

|              |          |              |             |
|--------------|----------|--------------|-------------|
| RP11-320N7.2 | CCDC146  | -0.477472461 | 2.22E-26    |
| RP11-320N7.2 | SLC16A2  | -0.490597436 | 5.75E-28    |
| RP11-320N7.2 | IER2     | -0.312972606 | 1.97E-11    |
| RP11-320N7.2 | KCNAB1   | -0.443520399 | 1.40E-22    |
| RP11-320N7.2 | SYNDIG1  | -0.389850557 | 2.20E-17    |
| RP11-320N7.2 | C16orf89 | -0.26598755  | 1.52E-08    |
| RP11-320N7.2 | CTGF     | -0.327708496 | 1.89E-12    |
| RP11-320N7.2 | NR4A3    | -0.321762752 | 4.95E-12    |
| RP11-320N7.2 | KIAA1456 | -0.36878497  | 1.37E-15    |
| RP11-320N7.2 | AQP4     | -0.224687471 | 1.98E-06    |
| RP11-320N7.2 | RNF150   | -0.671933507 | 5.81E-59    |
| RP11-320N7.2 | C1S      | -0.146052795 | 0.002155776 |
| RP11-320N7.2 | PFKFB2   | -0.326761875 | 2.21E-12    |
| RP11-320N7.2 | PROX1    | -0.506567026 | 5.43E-30    |
| RP11-320N7.2 | TCF7L1   | -0.546655745 | 1.42E-35    |
| RP11-320N7.2 | HSPB6    | -0.296511621 | 2.33E-10    |
| RP11-320N7.2 | FHDC1    | -0.358133565 | 9.90E-15    |
| RP11-320N7.2 | PRR15L   | -0.160801309 | 0.000720685 |
| RP11-320N7.2 | SLC1A1   | -0.217964601 | 4.04E-06    |
| RP11-320N7.2 | BTBD11   | -0.474702239 | 4.70E-26    |
| RP11-320N7.2 | TRIM58   | -0.517383671 | 2.00E-31    |
| RP11-320N7.2 | LRIG1    | -0.453065545 | 1.32E-23    |
| RP11-320N7.2 | ROR2     | -0.536381556 | 4.53E-34    |
| RP11-320N7.2 | GPR125   | -0.501298058 | 2.60E-29    |
| RP11-320N7.2 | FLRT1    | -0.537717166 | 2.91E-34    |
| RP11-320N7.2 | PGF      | -0.41667133  | 7.27E-20    |
| RP11-320N7.2 | DUSP1    | -0.378695984 | 2.03E-16    |
| RP11-320N7.2 | PLA2G7   | -0.628444241 | 1.27E-49    |
| RP11-320N7.2 | PLSCR4   | -0.368234003 | 1.52E-15    |
| RP11-320N7.2 | FAM46B   | -0.217491787 | 4.24E-06    |
| RP11-320N7.2 | GLDC     | -0.493795297 | 2.31E-28    |
| RP11-320N7.2 | ZBTB16   | -0.412517202 | 1.82E-19    |
| RP11-320N7.2 | OMD      | -0.217499477 | 4.24E-06    |
| RP11-320N7.2 | HSD11B2  | -0.364679209 | 2.96E-15    |
| RP11-320N7.2 | FGL2     | -0.26282373  | 2.28E-08    |
| RP11-320N7.2 | CLCNKA   | -0.392901843 | 1.18E-17    |
| RP11-320N7.2 | GATM     | -0.249630816 | 1.16E-07    |
| RP11-320N7.2 | TNS3     | -0.59734651  | 8.39E-44    |
| RP11-320N7.2 | TOB1     | -0.515892892 | 3.18E-31    |
| RP11-320N7.2 | MARC2    | -0.362471584 | 4.46E-15    |
| RP11-320N7.2 | LRRC2    | -0.396772708 | 5.28E-18    |
| RP11-320N7.2 | SORD     | -0.444528365 | 1.09E-22    |
| RP11-320N7.2 | RIMS4    | -0.393303938 | 1.08E-17    |
| RP11-320N7.2 | SLC29A4  | -0.532057224 | 1.87E-33    |
| RP11-320N7.2 | SLC39A14 | -0.467264581 | 3.41E-25    |
| RP11-320N7.2 | FAXDC2   | -0.516016645 | 3.06E-31    |
| RP11-320N7.2 | HSPB8    | -0.328518883 | 1.66E-12    |
| RP11-320N7.2 | CCL19    | -0.02771983  | 0.562420271 |
| RP11-320N7.2 | KCNIP3   | -0.37275173  | 6.43E-16    |
| RP11-320N7.2 | CGNL1    | -0.336684946 | 4.27E-13    |
| RP11-320N7.2 | ATF3     | -0.225706074 | 1.78E-06    |



|              |          |              |             |
|--------------|----------|--------------|-------------|
| RP11-320N7.2 | SGCD     | -0.433097423 | 1.69E-21    |
| RP11-320N7.2 | STARD13  | -0.621011689 | 3.59E-48    |
| RP11-320N7.2 | LDHD     | -0.226803823 | 1.58E-06    |
| RP11-320N7.2 | RCAN1    | -0.439156352 | 4.01E-22    |
| RP11-320N7.2 | ID3      | -0.437339631 | 6.20E-22    |
| RP11-320N7.2 | SYTL3    | -0.36029105  | 6.67E-15    |
| RP11-320N7.2 | MT1E     | -0.179384817 | 0.000157772 |
| RP11-320N7.2 | CAMK1D   | -0.428963436 | 4.45E-21    |
| RP11-320N7.2 | PRKCQ    | -0.487358584 | 1.44E-27    |
| RP11-320N7.2 | NUAK2    | -0.524196395 | 2.35E-32    |
| RP11-320N7.2 | LIPG     | -0.383049748 | 8.62E-17    |
| RP11-320N7.2 | SLC25A25 | -0.454805461 | 8.50E-24    |
| RP11-320N7.2 | PRKX     | -0.520458418 | 7.66E-32    |
| RP11-320N7.2 | SRPX     | -0.254315698 | 6.58E-08    |
| RP11-320N7.2 | FAM189A1 | -0.400012056 | 2.68E-18    |
| RP11-320N7.2 | PLEKHH1  | -0.424146291 | 1.35E-20    |
| RP11-320N7.2 | WNT11    | -0.449695777 | 3.06E-23    |
| RP11-320N7.2 | SNAI1    | -0.525745399 | 1.44E-32    |
| RP11-320N7.2 | FDCSP    | -0.046430794 | 0.331755959 |
| RP11-320N7.2 | MT1X     | -0.100789643 | 0.034760698 |
| RP11-320N7.2 | ACACB    | -0.468276093 | 2.61E-25    |
| RP11-320N7.2 | ARC      | -0.165089544 | 0.000514661 |
| RP11-320N7.2 | KLK4     | -0.266128769 | 1.49E-08    |
| RP11-320N7.2 | ZFPM2    | -0.508233755 | 3.29E-30    |
| RP11-320N7.2 | AKAP12   | -0.517780745 | 1.77E-31    |
| RP11-320N7.2 | GJB6     | -0.487861962 | 1.25E-27    |
| RP11-320N7.2 | ERO1LB   | -0.591420198 | 9.16E-43    |
| RP11-320N7.2 | DNALI1   | -0.419403043 | 3.94E-20    |
| RP11-320N7.2 | HKDC1    | -0.233839373 | 7.26E-07    |
| RP11-320N7.2 | ZFP36L2  | -0.494805036 | 1.72E-28    |
| RP11-320N7.2 | CAPSL    | -0.339673026 | 2.57E-13    |
| RP11-320N7.2 | CYP7B1   | -0.556142809 | 5.24E-37    |
| RP11-320N7.2 | CPQ      | -0.511076881 | 1.39E-30    |
| RP11-320N7.2 | RPS6KA6  | -0.599336649 | 3.72E-44    |
| RP11-320N7.2 | TLE1     | -0.506896868 | 4.92E-30    |
| RP11-320N7.2 | TP53INP2 | -0.568352579 | 6.38E-39    |
| RP11-320N7.2 | KATNAL2  | -0.393842706 | 9.69E-18    |
| RP11-320N7.2 | SGPP2    | -0.408969216 | 3.95E-19    |
| RP11-320N7.2 | CTH      | -0.507423297 | 4.20E-30    |
| RP11-320N7.2 | KIF12    | -0.388999888 | 2.61E-17    |
| RP11-320N7.2 | TMEM220  | -0.388478069 | 2.90E-17    |
| RP11-320N7.2 | CENPJ    | -0.473648318 | 6.24E-26    |
| RP11-320N7.2 | FAM155B  | -0.238637938 | 4.21E-07    |
| RP11-320N7.2 | WFS1     | -0.495642301 | 1.35E-28    |
| RP11-320N7.2 | SELENBP1 | -0.246975765 | 1.59E-07    |
| RP11-320N7.2 | SNTA1    | -0.166494157 | 0.000460095 |
| RP11-320N7.2 | FRAS1    | -0.482892202 | 5.00E-27    |
| RP11-320N7.2 | FBLN7    | -0.379339074 | 1.79E-16    |
| RP11-320N7.2 | AGPAT9   | -0.426097261 | 8.62E-21    |
| RP11-320N7.2 | GPR83    | -0.436572008 | 7.44E-22    |
| RP11-320N7.2 | PRTG     | -0.462066887 | 1.33E-24    |

|              |          |              |             |
|--------------|----------|--------------|-------------|
| RP11-320N7.2 | EGR3     | -0.268072699 | 1.16E-08    |
| RP11-320N7.2 | GRAMD2   | -0.45112117  | 2.14E-23    |
| RP11-320N7.2 | HYOU1    | -0.560410548 | 1.15E-37    |
| RP11-320N7.2 | FBLN5    | -0.338706764 | 3.03E-13    |
| RP11-320N7.2 | ITM2A    | -0.473035794 | 7.36E-26    |
| RP11-320N7.2 | SRF      | -0.458667901 | 3.18E-24    |
| RP11-320N7.2 | FGFR2    | -0.542628917 | 5.60E-35    |
| RP11-320N7.2 | MT1A     | -0.182250856 | 0.000123085 |
| RP11-320N7.2 | MAMDC2   | -0.260548804 | 3.03E-08    |
| RP11-320N7.2 | FHL2     | -0.395413482 | 7.01E-18    |
| RP11-320N7.2 | FTCDNL1  | -0.37421088  | 4.86E-16    |
| RP11-320N7.2 | PKIA     | -0.44292908  | 1.61E-22    |
| RP11-320N7.2 | DNAJB4   | -0.485272514 | 2.58E-27    |
| RP11-320N7.2 | SLC25A33 | -0.420930629 | 2.80E-20    |
| RP11-320N7.2 | EYA2     | -0.280911375 | 2.10E-09    |
| RP11-320N7.2 | LPAR1    | -0.410303053 | 2.96E-19    |
| RP11-320N7.2 | STX11    | -0.195649428 | 3.67E-05    |
| RP11-320N7.2 | ARHGEF28 | -0.329682941 | 1.37E-12    |
| RP11-320N7.2 | OR2W3    | -0.456600482 | 5.39E-24    |
| RP11-320N7.2 | ALDH1B1  | -0.38006111  | 1.56E-16    |
| RP11-320N7.2 | CXCL12   | -0.25276563  | 7.95E-08    |
| RP11-320N7.2 | OLFM2    | -0.417846805 | 5.59E-20    |
| RP11-320N7.2 | TUB      | -0.496309361 | 1.12E-28    |
| RP11-320N7.2 | HTRA3    | -0.310135295 | 3.05E-11    |
| RP11-320N7.2 | CKB      | -0.282256771 | 1.75E-09    |
| RP11-320N7.2 | RGS2     | -0.198649355 | 2.76E-05    |
| RP11-320N7.2 | SHANK2   | -0.580498239 | 6.60E-41    |
| RP11-320N7.2 | CNTFR    | -0.301379784 | 1.14E-10    |
| RP11-320N7.2 | CYTH3    | -0.507649882 | 3.92E-30    |
| RP11-320N7.2 | PLAC9    | -0.184336707 | 0.000102494 |
| RP11-320N7.2 | WWOX     | -0.444749418 | 1.03E-22    |
| RP11-320N7.2 | NPR3     | -0.438658929 | 4.52E-22    |
| RP11-320N7.2 | SDC2     | -0.543529725 | 4.13E-35    |
| RP11-320N7.2 | KLF15    | -0.346422707 | 8.01E-14    |
| RP11-320N7.2 | TMEM164  | -0.55043911  | 3.86E-36    |
| RP11-320N7.2 | LONRF3   | -0.337182014 | 3.92E-13    |
| RP11-320N7.2 | GBP1     | -0.19229661  | 5.00E-05    |
| RP11-320N7.2 | ARHGAP6  | -0.435297175 | 1.01E-21    |
| RP11-320N7.2 | TMEM119  | -0.201659211 | 2.07E-05    |
| RP11-320N7.2 | SH3RF1   | -0.560171623 | 1.25E-37    |
| RP11-320N7.2 | CRELD2   | -0.363707127 | 3.55E-15    |
| RP11-320N7.2 | PCP4     | -0.242264785 | 2.77E-07    |
| RP11-320N7.2 | GCSH     | -0.336554668 | 4.36E-13    |
| RP11-320N7.2 | IMPA2    | -0.473437335 | 6.61E-26    |
| RP11-320N7.2 | C1R      | -0.116836676 | 0.01430885  |
| RP11-320N7.2 | SUCNR1   | -0.324249655 | 3.32E-12    |
| RP11-320N7.2 | SFRP1    | -0.305478355 | 6.19E-11    |
| RP11-320N7.2 | UGT8     | -0.414868721 | 1.08E-19    |
| RP11-320N7.2 | TLE4     | -0.492631736 | 3.22E-28    |
| RP11-320N7.2 | ANTXR1   | -0.445466901 | 8.68E-23    |
| RP11-320N7.2 | GPX3     | -0.296157808 | 2.45E-10    |

|              |          |              |             |
|--------------|----------|--------------|-------------|
| RP11-320N7.2 | DPY19L2  | -0.368915318 | 1.34E-15    |
| RP11-320N7.2 | FAM46C   | -0.420360231 | 3.18E-20    |
| RP11-320N7.2 | IL33     | -0.294646118 | 3.05E-10    |
| RP11-320N7.2 | PEG3     | -0.563080704 | 4.38E-38    |
| RP11-320N7.2 | FAHD2A   | -0.334784257 | 5.87E-13    |
| RP11-320N7.2 | PTGDS    | -0.077245522 | 0.106034943 |
| RP11-320N7.2 | CHCHD10  | -0.07292502  | 0.127103441 |
| RP11-320N7.2 | CD36     | -0.433633213 | 1.49E-21    |
| RP11-320N7.2 | ANKRD37  | -0.413300356 | 1.53E-19    |
| RP11-320N7.2 | TSPAN33  | -0.344369968 | 1.14E-13    |
| RP11-320N7.2 | PRDM16   | -0.592242995 | 6.59E-43    |
| RP11-320N7.2 | UST      | -0.336513961 | 4.39E-13    |
| RP11-320N7.2 | NEXN     | -0.400518131 | 2.41E-18    |
| RP11-320N7.2 | NUPR1L   | -0.107606802 | 0.024149957 |
| RP11-320N7.2 | SLC24A3  | -0.407400851 | 5.55E-19    |
| RP11-320N7.2 | MARC1    | -0.401768355 | 1.85E-18    |
| RP11-320N7.2 | MYH11    | -0.299531405 | 1.50E-10    |
| RP11-320N7.2 | APOA1    | -0.368923274 | 1.33E-15    |
| RP11-320N7.2 | TMEM178B | -0.49802864  | 6.77E-29    |
| RP11-320N7.2 | CAPNG    | -0.353784095 | 2.17E-14    |
| RP11-320N7.2 | PPM1L    | -0.48841754  | 1.07E-27    |
| RP11-320N7.2 | FZD8     | -0.471919536 | 9.93E-26    |
| RP11-320N7.2 | RCAN2    | -0.391394525 | 1.60E-17    |
| RP11-320N7.2 | COPZ2    | -0.243916196 | 2.29E-07    |
| RP11-320N7.2 | GAS1     | -0.263632131 | 2.05E-08    |
| RP11-320N7.2 | DACT1    | -0.567179798 | 9.82E-39    |
| RP11-320N7.2 | WBSCR17  | -0.460548945 | 1.96E-24    |
| RP11-320N7.2 | NCS1     | -0.483984419 | 3.69E-27    |
| RP11-320N7.2 | SPIRE2   | -0.490772179 | 5.47E-28    |
| RP11-320N7.2 | C15orf52 | -0.246728189 | 1.64E-07    |
| RP11-320N7.2 | SPAG5    | -0.484600914 | 3.11E-27    |
| RP11-320N7.2 | ARL4D    | -0.241062644 | 3.19E-07    |
| RP11-320N7.2 | FAM189A2 | -0.414754045 | 1.11E-19    |
| RP11-320N7.2 | MAP1LC3A | -0.269682125 | 9.41E-09    |
| RP11-320N7.2 | KLF6     | -0.268867271 | 1.05E-08    |
| RP11-320N7.2 | ADD3     | -0.471540689 | 1.10E-25    |
| RP11-320N7.2 | TSPAN7   | -0.38782959  | 3.31E-17    |
| RP11-320N7.2 | KLF9     | -0.40018914  | 2.58E-18    |
| RP11-320N7.2 | KCNQ1    | -0.216071855 | 4.92E-06    |
| RP11-320N7.2 | MAN1A1   | -0.411769224 | 2.15E-19    |
| RP11-320N7.2 | MLF1     | -0.405444846 | 8.45E-19    |
| RP11-320N7.2 | RARB     | -0.533469639 | 1.18E-33    |
| RP11-320N7.2 | CDC42EP2 | -0.195264411 | 3.80E-05    |
| RP11-320N7.2 | FAM3B    | -0.25406422  | 6.78E-08    |
| RP11-320N7.2 | GADD45B  | -0.241393763 | 3.07E-07    |
| RP11-320N7.2 | TMEM47   | -0.396242095 | 5.90E-18    |
| RP11-320N7.2 | SDF2L1   | -0.248507181 | 1.33E-07    |
| RP11-320N7.2 | CCDC85A  | -0.601550493 | 1.49E-44    |
| RP11-320N7.2 | CRYBG3   | -0.466509937 | 4.16E-25    |
| RP11-320N7.2 | FBLN2    | -0.16228989  | 0.000641788 |
| RP11-320N7.2 | PEBP4    | 0.198672617  | 2.76E-05    |

|              |          |              |             |
|--------------|----------|--------------|-------------|
| RP11-320N7.2 | CDADC1   | -0.428049225 | 5.49E-21    |
| RP11-320N7.2 | FAM63A   | -0.467309827 | 3.37E-25    |
| RP11-320N7.2 | GLUL     | -0.485621433 | 2.34E-27    |
| RP11-320N7.2 | FREM2    | -0.324086258 | 3.41E-12    |
| RP11-320N7.2 | ACKR3    | -0.513686047 | 6.27E-31    |
| RP11-320N7.2 | DENND6A  | -0.583611707 | 1.98E-41    |
| RP11-320N7.2 | CLDN8    | -0.21483007  | 5.59E-06    |
| RP11-320N7.2 | UTS2R    | -0.419620062 | 3.76E-20    |
| RP11-320N7.2 | SCNN1B   | -0.337383778 | 3.79E-13    |
| RP11-320N7.2 | TTC30A   | -0.527235327 | 8.92E-33    |
| RP11-320N7.2 | CORO2B   | -0.444607439 | 1.07E-22    |
| RP11-320N7.2 | TC2N     | -0.449173816 | 3.48E-23    |
| RP11-320N7.2 | ALDH2    | -0.222905783 | 2.40E-06    |
| RP11-320N7.2 | GPR183   | -0.16494799  | 0.000520482 |
| RP11-320N7.2 | C4orf47  | -0.353038135 | 2.48E-14    |
| RP11-320N7.2 | SLC25A42 | -0.428313396 | 5.17E-21    |
| RP11-320N7.2 | LGMN     | -0.372135447 | 7.24E-16    |
| RP11-320N7.2 | ACSF2    | -0.282322868 | 1.73E-09    |
| RP11-320N7.2 | KIAA1467 | -0.494198469 | 2.05E-28    |
| RP11-320N7.2 | PRKG1    | -0.441873598 | 2.08E-22    |
| RP11-320N7.2 | GNAI1    | -0.399658598 | 2.89E-18    |
| RP11-320N7.2 | ABCC4    | -0.440798543 | 2.70E-22    |
| RP11-320N7.2 | PRPS1    | -0.467255716 | 3.42E-25    |
| RP11-320N7.2 | TSPAN5   | -0.387731367 | 3.37E-17    |
| RP11-320N7.2 | CR2      | -0.168531956 | 0.000390432 |
| RP11-320N7.2 | CCDC170  | -0.438676021 | 4.50E-22    |
| RP11-320N7.2 | RRAD     | -0.054408105 | 0.255300522 |
| RP11-320N7.2 | SCGB2A1  | -0.211373853 | 7.94E-06    |
| RP11-320N7.2 | SESN3    | -0.409402245 | 3.60E-19    |
| RP11-320N7.2 | SGK223   | -0.443238994 | 1.50E-22    |
| RP11-320N7.2 | NDRG2    | -0.382849261 | 8.97E-17    |
| RP11-320N7.2 | C3orf52  | -0.394260984 | 8.89E-18    |
| RP11-320N7.2 | FLRT3    | 0.233961424  | 7.16E-07    |
| RP11-320N7.2 | MST1R    | 0.435039386  | 1.07E-21    |
| RP11-320N7.2 | SDC1     | 0.395271077  | 7.22E-18    |
| RP11-320N7.2 | ST8SIA4  | 0.311310629  | 2.55E-11    |
| RP11-320N7.2 | UBTD1    | 0.533457441  | 1.19E-33    |
| RP11-320N7.2 | EPHA2    | 0.193176071  | 4.61E-05    |
| RP11-320N7.2 | TMEM130  | 0.23363144   | 7.43E-07    |
| RP11-320N7.2 | SPINK2   | 0.621261181  | 3.21E-48    |
| RP11-320N7.2 | MMP16    | 0.245267124  | 1.95E-07    |
| RP11-320N7.2 | SIGLEC15 | 0.396924119  | 5.12E-18    |
| RP11-320N7.2 | RIN1     | 0.481433123  | 7.49E-27    |
| RP11-320N7.2 | IL1RN    | 0.442511866  | 1.78E-22    |
| RP11-320N7.2 | FCER1G   | 0.315429935  | 1.35E-11    |
| RP11-320N7.2 | CD276    | 0.356885326  | 1.24E-14    |
| RP11-320N7.2 | CTSB     | 0.50488278   | 8.98E-30    |
| RP11-320N7.2 | FAM171A2 | 0.233159618  | 7.83E-07    |
| RP11-320N7.2 | ASPHD1   | 0.447994653  | 4.66E-23    |
| RP11-320N7.2 | C15orf48 | 0.396807316  | 5.24E-18    |
| RP11-320N7.2 | DYSF     | 0.139152629  | 0.003483674 |

|              |          |              |             |
|--------------|----------|--------------|-------------|
| RP11-320N7.2 | PDZRN4   | 0.148681889  | 0.001785748 |
| RP11-320N7.2 | EFHD2    | 0.335901366  | 4.87E-13    |
| RP11-320N7.2 | ASF1B    | 0.436713065  | 7.19E-22    |
| RP11-320N7.2 | AQP1     | 0.275995724  | 4.08E-09    |
| RP11-320N7.2 | ARRDC2   | 0.369592307  | 1.18E-15    |
| RP11-320N7.2 | PRSS1    | 0.54536197   | 2.22E-35    |
| RP11-320N7.2 | MAPK13   | 0.468376798  | 2.55E-25    |
| RP11-320N7.2 | CST5     | 0.358826631  | 8.72E-15    |
| RP11-320N7.2 | AHR      | 0.199627181  | 2.52E-05    |
| RP11-320N7.2 | BAX      | 0.49908632   | 4.97E-29    |
| RP11-320N7.2 | C1orf115 | 0.359444282  | 7.79E-15    |
| RP11-320N7.2 | PLK3     | 0.394181626  | 9.04E-18    |
| RP11-320N7.2 | JAG2     | 0.36446858   | 3.08E-15    |
| RP11-320N7.2 | RAD23B   | 0.336831747  | 4.16E-13    |
| RP11-320N7.2 | CA12     | 0.111195102  | 0.019785835 |
| RP11-320N7.2 | ADTRP    | 0.256067458  | 5.30E-08    |
| RP11-320N7.2 | UCP2     | 0.23039741   | 1.06E-06    |
| RP11-320N7.2 | IGFBP2   | 0.30329853   | 8.57E-11    |
| RP11-320N7.2 | LOXL2    | 0.147048989  | 0.002008025 |
| RP11-320N7.2 | GPX1     | 0.608568384  | 7.90E-46    |
| RP11-320N7.2 | P3H3     | 0.468266094  | 2.62E-25    |
| RP11-320N7.2 | C2orf81  | 0.404447021  | 1.05E-18    |
| RP11-320N7.2 | CDT1     | 0.515469224  | 3.62E-31    |
| RP11-320N7.2 | SNX25    | 0.20705257   | 1.22E-05    |
| RP11-320N7.2 | MTHFD1L  | 0.365410521  | 2.58E-15    |
| RP11-320N7.2 | CDC42BPG | 0.386532857  | 4.29E-17    |
| RP11-320N7.2 | MSN      | 0.344862427  | 1.05E-13    |
| RP11-320N7.2 | SIGLEC6  | 0.177552714  | 0.000184543 |
| RP11-320N7.2 | F2R      | -0.021576059 | 0.65211047  |
| RP11-320N7.2 | TMEM184A | 0.462471832  | 1.19E-24    |
| RP11-320N7.2 | CKS2     | 0.344731369  | 1.08E-13    |
| RP11-320N7.2 | TAX1BP3  | 0.518721976  | 1.32E-31    |
| RP11-320N7.2 | PMEP1    | 0.387616267  | 3.45E-17    |
| RP11-320N7.2 | CXCL16   | 0.410755159  | 2.68E-19    |
| RP11-320N7.2 | FAXC     | 0.34165563   | 1.83E-13    |
| RP11-320N7.2 | VTCN1    | 0.312669155  | 2.07E-11    |
| RP11-320N7.2 | SH2D4A   | 0.262492469  | 2.37E-08    |
| RP11-320N7.2 | RNF24    | 0.293547366  | 3.57E-10    |
| RP11-320N7.2 | LY6G6C   | 0.392522306  | 1.27E-17    |
| RP11-320N7.2 | NID1     | 0.052087506  | 0.276161719 |
| RP11-320N7.2 | STAC     | 0.332411604  | 8.73E-13    |
| RP11-320N7.2 | RAB34    | 0.480990236  | 8.46E-27    |
| RP11-320N7.2 | HES4     | 0.377528948  | 2.55E-16    |
| RP11-320N7.2 | EPHA10   | 0.396852349  | 5.20E-18    |
| RP11-320N7.2 | ENTPD2   | 0.385835784  | 4.94E-17    |
| RP11-320N7.2 | DDB2     | 0.551846206  | 2.37E-36    |
| RP11-320N7.2 | NKAIN4   | 0.35731176   | 1.15E-14    |
| RP11-320N7.2 | TRIM29   | 0.168302369  | 0.000397758 |
| RP11-320N7.2 | ADCY8    | 0.494197852  | 2.05E-28    |
| RP11-320N7.2 | SFTA2    | 0.416486728  | 7.57E-20    |
| RP11-320N7.2 | NRIP1    | 0.063398242  | 0.184876951 |

|              |          |             |             |
|--------------|----------|-------------|-------------|
| RP11-320N7.2 | VWA1     | 0.22865338  | 1.29E-06    |
| RP11-320N7.2 | APLNR    | 0.195735523 | 3.64E-05    |
| RP11-320N7.2 | REN      | 0.490410559 | 6.06E-28    |
| RP11-320N7.2 | EDIL3    | 0.235821051 | 5.81E-07    |
| RP11-320N7.2 | AGRN     | 0.284002858 | 1.37E-09    |
| RP11-320N7.2 | TREM1    | 0.484753389 | 2.98E-27    |
| RP11-320N7.2 | SRL      | 0.305069793 | 6.58E-11    |
| RP11-320N7.2 | RASGRF1  | 0.287175472 | 8.82E-10    |
| RP11-320N7.2 | RMI2     | 0.358883245 | 8.63E-15    |
| RP11-320N7.2 | SAMD1    | 0.444252208 | 1.17E-22    |
| RP11-320N7.2 | MGAT4B   | 0.501955616 | 2.14E-29    |
| RP11-320N7.2 | NXN      | 0.336328367 | 4.53E-13    |
| RP11-320N7.2 | SH3BGRL3 | 0.522668454 | 3.82E-32    |
| RP11-320N7.2 | CA11     | 0.513070119 | 7.57E-31    |
| RP11-320N7.2 | PLD3     | 0.452000206 | 1.72E-23    |
| RP11-320N7.2 | LURAP1L  | 0.544820017 | 2.67E-35    |
| RP11-320N7.2 | CARNS1   | 0.264315006 | 1.88E-08    |
| RP11-320N7.2 | PDLIM7   | 0.466101445 | 4.64E-25    |
| RP11-320N7.2 | BCL2L1   | 0.431122411 | 2.69E-21    |
| RP11-320N7.2 | GGT6     | 0.315000807 | 1.44E-11    |
| RP11-320N7.2 | DPYSL3   | 0.175031975 | 0.00022838  |
| RP11-320N7.2 | FYN      | 0.270108913 | 8.90E-09    |
| RP11-320N7.2 | TK1      | 0.460159886 | 2.17E-24    |
| RP11-320N7.2 | AK1      | 0.569660956 | 3.94E-39    |
| RP11-320N7.2 | HIGD1B   | 0.324440284 | 3.22E-12    |
| RP11-320N7.2 | TMEM59L  | 0.164845371 | 0.000524739 |
| RP11-320N7.2 | MEGF9    | 0.289199985 | 6.63E-10    |
| RP11-320N7.2 | ZFP36L1  | 0.161918561 | 0.000660682 |
| RP11-320N7.2 | ADRA1B   | 0.383965803 | 7.18E-17    |
| RP11-320N7.2 | EPHA4    | 0.23461274  | 6.65E-07    |
| RP11-320N7.2 | TCERG1L  | 0.046635072 | 0.329630757 |
| RP11-320N7.2 | NGFR     | 0.23492152  | 6.43E-07    |
| RP11-320N7.2 | EBI3     | 0.404874164 | 9.55E-19    |
| RP11-320N7.2 | S100A10  | 0.326661809 | 2.25E-12    |
| RP11-320N7.2 | S100B    | 0.381094167 | 1.27E-16    |
| RP11-320N7.2 | CD44     | 0.240928537 | 3.24E-07    |
| RP11-320N7.2 | BHLHE41  | 0.273288832 | 5.85E-09    |
| RP11-320N7.2 | FBXO2    | 0.48812876  | 1.16E-27    |
| RP11-320N7.2 | SLC30A2  | 0.299378576 | 1.53E-10    |
| RP11-320N7.2 | FRMD5    | 0.594523879 | 2.64E-43    |
| RP11-320N7.2 | SAMD11   | 0.128078479 | 0.007210437 |
| RP11-320N7.2 | SIPA1L2  | 0.185922447 | 8.91E-05    |
| RP11-320N7.2 | S100A16  | 0.500537811 | 3.25E-29    |
| RP11-320N7.2 | PPL      | 0.304808529 | 6.84E-11    |
| RP11-320N7.2 | ARHGDIB  | 0.231108014 | 9.84E-07    |
| RP11-320N7.2 | CDC42EP3 | 0.390123948 | 2.08E-17    |
| RP11-320N7.2 | RUNX2    | 0.31225725  | 2.20E-11    |
| RP11-320N7.2 | LAMC2    | 0.32407867  | 3.41E-12    |
| RP11-320N7.2 | BRINP1   | 0.35416957  | 2.03E-14    |
| RP11-320N7.2 | GPRC5B   | 0.324474892 | 3.20E-12    |
| RP11-320N7.2 | AQP5     | 0.141272457 | 0.003012708 |

|              |          |             |             |
|--------------|----------|-------------|-------------|
| RP11-320N7.2 | PLAG1    | 0.28139121  | 1.97E-09    |
| RP11-320N7.2 | PTPRU    | 0.214677312 | 5.67E-06    |
| RP11-320N7.2 | ANGPTL4  | 0.401476312 | 1.97E-18    |
| RP11-320N7.2 | PALM3    | 0.344175793 | 1.18E-13    |
| RP11-320N7.2 | ACP5     | 0.339176742 | 2.80E-13    |
| RP11-320N7.2 | DLG4     | 0.351526009 | 3.25E-14    |
| RP11-320N7.2 | ETNK2    | 0.369600959 | 1.17E-15    |
| RP11-320N7.2 | CD109    | 0.156688385 | 0.000987744 |
| RP11-320N7.2 | SNX22    | 0.296109583 | 2.47E-10    |
| RP11-320N7.2 | TMEM98   | 0.306495256 | 5.31E-11    |
| RP11-320N7.2 | CTHRC1   | 0.189744604 | 6.32E-05    |
| RP11-320N7.2 | S100A2   | 0.41426414  | 1.24E-19    |
| RP11-320N7.2 | C11orf80 | 0.52665883  | 1.07E-32    |
| RP11-320N7.2 | SREBF1   | 0.393584562 | 1.02E-17    |
| RP11-320N7.2 | PRSS22   | 0.428146241 | 5.37E-21    |
| RP11-320N7.2 | CMTM3    | 0.4295922   | 3.84E-21    |
| RP11-320N7.2 | RDH5     | 0.490025123 | 6.77E-28    |
| RP11-320N7.2 | MYH10    | 0.362547183 | 4.40E-15    |
| RP11-320N7.2 | EVPL     | 0.294985169 | 2.90E-10    |
| RP11-320N7.2 | SCD      | 0.252327566 | 8.38E-08    |
| RP11-320N7.2 | CD151    | 0.491987369 | 3.87E-28    |
| RP11-320N7.2 | S100A4   | 0.383243355 | 8.29E-17    |
| RP11-320N7.2 | BNIP1    | 0.419426375 | 3.92E-20    |
| RP11-320N7.2 | MAP3K6   | 0.559050826 | 1.87E-37    |
| RP11-320N7.2 | MANEAL   | 0.525011249 | 1.82E-32    |
| RP11-320N7.2 | CD207    | 0.432784198 | 1.82E-21    |
| RP11-320N7.2 | CD1A     | 0.423289908 | 1.64E-20    |
| RP11-320N7.2 | C3       | 0.147156501 | 0.001992646 |
| RP11-320N7.2 | NT5E     | 0.245078338 | 1.99E-07    |
| RP11-320N7.2 | CACNG4   | 0.271307417 | 7.60E-09    |
| RP11-320N7.2 | FHOD1    | 0.460455262 | 2.01E-24    |
| RP11-320N7.2 | LEMD1    | 0.410042427 | 3.13E-19    |
| RP11-320N7.2 | ATP11A   | 0.124174836 | 0.009202965 |
| RP11-320N7.2 | PPAP2C   | 0.329827331 | 1.34E-12    |
| RP11-320N7.2 | DRAM1    | 0.248179467 | 1.38E-07    |
| RP11-320N7.2 | CDA      | 0.320445582 | 6.11E-12    |
| RP11-320N7.2 | CCND2    | 0.469620568 | 1.83E-25    |
| RP11-320N7.2 | LCN6     | 0.221250515 | 2.86E-06    |
| RP11-320N7.2 | CDH4     | 0.402455698 | 1.60E-18    |
| RP11-320N7.2 | MMP11    | 0.427326777 | 6.49E-21    |
| RP11-320N7.2 | B3GAT1   | 0.227659527 | 1.44E-06    |
| RP11-320N7.2 | SPP1     | 0.211892622 | 7.54E-06    |
| RP11-320N7.2 | HLA-DQB1 | 0.413676367 | 1.41E-19    |
| RP11-320N7.2 | SDC3     | 0.243560255 | 2.38E-07    |
| RP11-320N7.2 | CX3CL1   | 0.350283089 | 4.06E-14    |
| RP11-320N7.2 | SDK1     | 0.095468692 | 0.045591432 |
| RP11-320N7.2 | DOCK9    | 0.202264643 | 1.95E-05    |
| RP11-320N7.2 | CSF2     | 0.491202543 | 4.84E-28    |
| RP11-320N7.2 | GRHL3    | 0.391305239 | 1.63E-17    |
| RP11-320N7.2 | TMEM92   | 0.442040282 | 2.00E-22    |
| RP11-320N7.2 | BASP1    | 0.279887027 | 2.41E-09    |

|              |          |              |             |
|--------------|----------|--------------|-------------|
| RP11-320N7.2 | HRH1     | 0.256715441  | 4.89E-08    |
| RP11-320N7.2 | ESM1     | -0.006368348 | 0.894151765 |
| RP11-320N7.2 | B4GALNT3 | 0.366596705  | 2.07E-15    |
| RP11-320N7.2 | LMO3     | 0.39098568   | 1.74E-17    |
| RP11-320N7.2 | C9orf16  | 0.639725545  | 6.70E-52    |
| RP11-320N7.2 | SEMA3F   | 0.249398699  | 1.19E-07    |
| RP11-320N7.2 | PLA2G12B | 0.442277074  | 1.89E-22    |
| RP11-320N7.2 | KLK6     | 0.217974942  | 4.03E-06    |
| RP11-320N7.2 | ST3GAL5  | 0.434980453  | 1.09E-21    |
| RP11-320N7.2 | FAM132B  | 0.341472873  | 1.89E-13    |
| RP11-320N7.2 | CDKN1A   | 0.247234831  | 1.55E-07    |
| RP11-320N7.2 | E2F1     | 0.541923702  | 7.11E-35    |
| RP11-320N7.2 | B3GNT8   | 0.402563282  | 1.56E-18    |
| RP11-320N7.2 | MTMR11   | 0.35721446   | 1.17E-14    |
| RP11-320N7.2 | MYO1G    | 0.208776105  | 1.03E-05    |
| RP11-320N7.2 | TMSB10   | 0.445531721  | 8.55E-23    |
| RP11-320N7.2 | UNC5CL   | 0.531660009  | 2.13E-33    |
| RP11-320N7.2 | ABR      | 0.421646978  | 2.38E-20    |
| RP11-320N7.2 | PLP2     | 0.496412477  | 1.08E-28    |
| RP11-320N7.2 | SRCIN1   | 0.568064791  | 7.10E-39    |
| RP11-320N7.2 | PDE9A    | 0.508893085  | 2.70E-30    |
| RP11-320N7.2 | TREM2    | 0.353771858  | 2.18E-14    |
| RP11-320N7.2 | KDEL3    | 0.307485138  | 4.57E-11    |
| RP11-320N7.2 | PC       | 0.410968695  | 2.56E-19    |
| RP11-320N7.2 | C2CD4A   | 0.455268418  | 7.56E-24    |
| RP11-320N7.2 | PELI1    | 0.175226789  | 0.000224672 |
| RP11-320N7.2 | SSX1     | 0.21945531   | 3.46E-06    |
| RP11-320N7.2 | MROH6    | 0.488136986  | 1.15E-27    |
| RP11-320N7.2 | ESPN     | 0.436989577  | 6.74E-22    |
| RP11-320N7.2 | BMP1     | 0.403608551  | 1.25E-18    |
| RP11-320N7.2 | TM4SF4   | 0.435258266  | 1.02E-21    |
| RP11-320N7.2 | CORO2A   | 0.282931775  | 1.59E-09    |
| RP11-320N7.2 | CD164L2  | 0.648916476  | 7.91E-54    |
| RP11-320N7.2 | CTSS     | 0.295168919  | 2.83E-10    |
| RP11-320N7.2 | CLU      | 0.388802096  | 2.72E-17    |
| RP11-320N7.2 | TMSB4X   | 0.391829185  | 1.47E-17    |
| RP11-320N7.2 | WNT10A   | 0.243068585  | 2.52E-07    |
| RP11-320N7.2 | NAPSA    | 0.364533684  | 3.04E-15    |
| RP11-320N7.2 | PLEKHA4  | 0.389162717  | 2.52E-17    |
| RP11-320N7.2 | SFTPA1   | 0.157071384  | 0.000959476 |
| RP11-320N7.2 | C1orf116 | 0.329783361  | 1.35E-12    |
| RP11-320N7.2 | TM4SF1   | 0.320806344  | 5.77E-12    |
| RP11-320N7.2 | SEL1L3   | 0.077034539  | 0.10699526  |
| RP11-320N7.2 | VASN     | 0.483339982  | 4.42E-27    |
| RP11-320N7.2 | NPTXR    | 0.466526673  | 4.15E-25    |
| RP11-320N7.2 | PDE4C    | 0.494295273  | 2.00E-28    |
| RP11-320N7.2 | CDC42EP1 | 0.354149925  | 2.04E-14    |
| RP11-320N7.2 | ENDOD1   | 0.349875095  | 4.36E-14    |
| RP11-320N7.2 | RYR1     | 0.378664071  | 2.05E-16    |
| RP11-320N7.2 | IL1RAP   | 0.264371457  | 1.87E-08    |
| RP11-320N7.2 | SLC35F2  | 0.381076522  | 1.27E-16    |



|              |          |             |             |
|--------------|----------|-------------|-------------|
| RP11-320N7.2 | ISYNA1   | 0.441155406 | 2.48E-22    |
| RP11-320N7.2 | HLA-G    | 0.314770463 | 1.49E-11    |
| RP11-320N7.2 | CDKN2B   | 0.401267244 | 2.06E-18    |
| RP11-320N7.2 | ALDH1A3  | 0.261697614 | 2.62E-08    |
| RP11-320N7.2 | CLIP3    | 0.266870203 | 1.36E-08    |
| RP11-320N7.2 | ULBP2    | 0.459807775 | 2.38E-24    |
| RP11-320N7.2 | ETHE1    | 0.47775337  | 2.06E-26    |
| RP11-320N7.2 | XPR1     | 0.197673232 | 3.03E-05    |
| RP11-320N7.2 | SPTBN2   | 0.457898859 | 3.87E-24    |
| RP11-320N7.2 | IVL      | 0.474981593 | 4.36E-26    |
| RP11-320N7.2 | MARCO    | 0.336677499 | 4.27E-13    |
| RP11-320N7.2 | PLXND1   | 0.195401922 | 3.75E-05    |
| RP11-320N7.2 | EMILIN2  | 0.467087356 | 3.58E-25    |
| RP11-320N7.2 | PLAUR    | 0.349911901 | 4.33E-14    |
| RP11-320N7.2 | CDC42EP5 | 0.399310388 | 3.11E-18    |
| RP11-320N7.2 | TRPC5    | 0.296313266 | 2.40E-10    |
| RP11-320N7.2 | TMEM100  | 0.302446869 | 9.73E-11    |
| RP11-320N7.2 | QSOX1    | 0.315483479 | 1.34E-11    |
| RP11-320N7.2 | ARHGAP23 | 0.22493526  | 1.93E-06    |
| RP11-320N7.2 | MDF1     | 0.12829088  | 0.007114029 |
| RP11-320N7.2 | FSTL3    | 0.333751469 | 6.98E-13    |
| RP11-320N7.2 | INF2     | 0.461679104 | 1.47E-24    |
| RP11-320N7.2 | TGFBR1   | 0.317674579 | 9.47E-12    |
| RP11-320N7.2 | TGFBI    | 0.260749219 | 2.96E-08    |
| RP11-320N7.2 | ERBB3    | 0.322181952 | 4.63E-12    |
| RP11-320N7.2 | CCL18    | 0.151454593 | 0.001459303 |
| RP11-320N7.2 | CCL17    | 0.428191432 | 5.32E-21    |
| RP11-320N7.2 | C16orf45 | 0.247676654 | 1.47E-07    |
| RP11-320N7.2 | PRDM1    | 0.147069839 | 0.002005034 |
| RP11-320N7.2 | TRIM47   | 0.520617559 | 7.29E-32    |
| RP11-320N7.2 | CNFN     | 0.538696977 | 2.10E-34    |
| RP11-320N7.2 | ARMCX3   | 0.329346574 | 1.45E-12    |
| RP11-320N7.2 | RAMP1    | 0.33048659  | 1.20E-12    |
| RP11-320N7.2 | GABRD    | 0.212625708 | 7.00E-06    |
| RP11-320N7.2 | COL13A1  | 0.431985206 | 2.20E-21    |
| RP11-320N7.2 | S100A5   | 0.530343406 | 3.27E-33    |
| RP11-320N7.2 | MISP     | 0.269982678 | 9.05E-09    |
| RP11-320N7.2 | HES6     | 0.467550383 | 3.17E-25    |
| RP11-320N7.2 | PSD3     | 0.333609207 | 7.15E-13    |
| RP11-320N7.2 | DOK7     | 0.348963933 | 5.12E-14    |
| RP11-320N7.2 | ZMAT3    | 0.300017552 | 1.39E-10    |
| RP11-320N7.2 | MFAP2    | 0.197705996 | 3.02E-05    |
| RP11-320N7.2 | TMEM79   | 0.437597916 | 5.83E-22    |
| RP11-320N7.2 | SLC1A5   | 0.329817119 | 1.34E-12    |
| RP11-320N7.2 | BBC3     | 0.451045712 | 2.18E-23    |
| RP11-320N7.2 | HLA-DQB2 | 0.415581665 | 9.26E-20    |
| RP11-320N7.2 | C1QL1    | 0.306126551 | 5.61E-11    |
| RP11-320N7.2 | TMEM215  | 0.34701198  | 7.22E-14    |
| RP11-320N7.2 | PNP      | 0.306438451 | 5.35E-11    |
| RP11-320N7.2 | ARNTL    | 0.194496363 | 4.08E-05    |
| RP11-320N7.2 | CLDN2    | 0.55146479  | 2.71E-36    |

|              |           |             |             |
|--------------|-----------|-------------|-------------|
| RP11-320N7.2 | MVP       | 0.536047388 | 5.06E-34    |
| RP11-320N7.2 | LGALS1    | 0.484176963 | 3.50E-27    |
| RP11-320N7.2 | BIRC7     | 0.481384176 | 7.59E-27    |
| RP11-320N7.2 | COL8A1    | 0.379227803 | 1.83E-16    |
| RP11-320N7.2 | PERP      | 0.374804681 | 4.33E-16    |
| RP11-320N7.2 | GJA4      | 0.232475396 | 8.45E-07    |
| RP11-320N7.2 | IGFL2     | 0.39696993  | 5.07E-18    |
| RP11-320N7.2 | DAPK2     | 0.314854927 | 1.47E-11    |
| RP11-320N7.2 | MAMLD1    | 0.325683061 | 2.63E-12    |
| RP11-320N7.2 | ETV5      | 0.321161859 | 5.45E-12    |
| RP11-320N7.2 | RUNX1     | 0.289335227 | 6.51E-10    |
| RP11-320N7.2 | LONRF2    | 0.204880405 | 1.52E-05    |
| RP11-320N7.2 | SPOCK1    | 0.107793421 | 0.023904019 |
| RP11-320N7.2 | XKRX      | 0.242441514 | 2.72E-07    |
| RP11-320N7.2 | TGFB1     | 0.2048353   | 1.52E-05    |
| RP11-320N7.2 | ERP27     | 0.227832639 | 1.41E-06    |
| RP11-320N7.2 | TNFRSF10C | 0.408643912 | 4.24E-19    |
| RP11-320N7.2 | PALM      | 0.315703043 | 1.29E-11    |
| RP11-320N7.2 | TSC22D1   | 0.304732929 | 6.92E-11    |
| RP11-320N7.2 | TGM2      | 0.256863874 | 4.80E-08    |
| RP11-320N7.2 | UBE2QL1   | 0.445546827 | 8.51E-23    |
| RP11-320N7.2 | ECE1      | 0.296576299 | 2.31E-10    |
| RP11-320N7.2 | COL8A2    | 0.269468377 | 9.67E-09    |
| RP11-320N7.2 | HIST3H2A  | 0.429589009 | 3.84E-21    |
| RP11-320N7.2 | TNFRSF21  | 0.23304778  | 7.93E-07    |
| RP11-320N7.2 | SOX4      | 0.130499285 | 0.006177903 |
| RP11-320N7.2 | ELF3      | 0.304874199 | 6.77E-11    |
| RP11-320N7.2 | TPD52L1   | 0.488672493 | 9.92E-28    |
| RP11-320N7.2 | INHBB     | 0.261229055 | 2.78E-08    |
| RP11-320N7.2 | HPN       | 0.506762761 | 5.12E-30    |
| RP11-320N7.2 | MMP7      | 0.354872369 | 1.79E-14    |
| RP11-320N7.2 | RAB27A    | 0.376068522 | 3.39E-16    |
| RP11-320N7.2 | IGF2BP2   | 0.280977826 | 2.08E-09    |
| RP11-320N7.2 | ITGB4     | 0.300323495 | 1.33E-10    |
| RP11-320N7.2 | PPP1R1B   | 0.29620972  | 2.43E-10    |
| RP11-320N7.2 | NPDC1     | 0.525917873 | 1.36E-32    |
| RP11-320N7.2 | CCL13     | 0.390182878 | 2.05E-17    |
| RP11-320N7.2 | SPINT1    | 0.554660397 | 8.84E-37    |
| RP11-320N7.2 | HEY2      | 0.436948728 | 6.80E-22    |
| RP11-320N7.2 | CST2      | 0.36703657  | 1.90E-15    |
| RP11-320N7.2 | ADM       | 0.531336479 | 2.37E-33    |
| RP11-320N7.2 | VSTM2L    | 0.454884039 | 8.33E-24    |
| RP11-320N7.2 | FAM84A    | 0.279754551 | 2.46E-09    |
| RP11-320N7.2 | P4HA2     | 0.543128396 | 4.73E-35    |
| RP11-320N7.2 | LPL       | 0.216734518 | 4.59E-06    |
| RP11-320N7.2 | TMEM173   | 0.404348515 | 1.07E-18    |
| RP11-320N7.2 | DHRS3     | 0.439920004 | 3.34E-22    |
| RP11-320N7.2 | SCN1B     | 0.619499563 | 7.00E-48    |
| RP11-320N7.2 | GLT1D1    | 0.357724222 | 1.07E-14    |
| RP11-320N7.2 | PHYHIP    | 0.481661835 | 7.03E-27    |
| RP11-320N7.2 | BHLHE40   | 0.268596362 | 1.08E-08    |

|              |            |             |          |
|--------------|------------|-------------|----------|
| RP11-320N7.2 | BID        | 0.479468891 | 1.29E-26 |
| RP11-320N7.2 | POSTN      | 0.194895776 | 3.93E-05 |
| RP11-320N7.2 | ITGA3      | 0.49218502  | 3.66E-28 |
| RP11-320N7.2 | RSPO4      | 0.31724999  | 1.01E-11 |
| RP11-320N7.2 | ADAMTS9    | 0.3107803   | 2.76E-11 |
| RP11-320N7.2 | ABTB2      | 0.342853374 | 1.49E-13 |
| RP11-320N7.2 | KCNQ3      | 0.300583199 | 1.28E-10 |
| RP11-320N7.2 | ANXA1      | 0.362379531 | 4.54E-15 |
| RP11-320N7.2 | S100A11    | 0.563181337 | 4.22E-38 |
| RP11-320N7.2 | CEACAM6    | 0.353358488 | 2.35E-14 |
| RP11-320N7.2 | IER5L      | 0.493993089 | 2.18E-28 |
| RP11-320N7.2 | KRT80      | 0.343771344 | 1.27E-13 |
| RP11-320N7.2 | CDH6       | 0.364206607 | 3.23E-15 |
| RP11-320N7.2 | UNC5B      | 0.327624458 | 1.92E-12 |
| RP11-320N7.2 | PLEKHN1    | 0.438750273 | 4.42E-22 |
| RP11-320N7.2 | SYTL1      | 0.527189939 | 9.05E-33 |
| RP11-320N7.2 | TMEM163    | 0.282609095 | 1.66E-09 |
| RP11-320N7.2 | C4orf48    | 0.423639932 | 1.51E-20 |
| RP11-320N7.2 | B3GNT7     | 0.425118088 | 1.08E-20 |
| RP11-320N7.2 | BAIAP3     | 0.233788241 | 7.30E-07 |
| RP11-320N7.2 | PHLDA2     | 0.629134421 | 9.28E-50 |
| RP11-320N7.2 | GAP43      | 0.269223403 | 9.99E-09 |
| RP11-320N7.2 | S100A1     | 0.638272352 | 1.33E-51 |
| RP11-320N7.2 | PTPRE      | 0.278467804 | 2.93E-09 |
| RP11-320N7.2 | CCND1      | 0.340812692 | 2.11E-13 |
| RP11-320N7.2 | ST6GALNAC5 | 0.333853758 | 6.86E-13 |
| RP11-320N7.2 | KRT17      | 0.220543201 | 3.08E-06 |
| RP11-320N7.2 | HPCAL4     | 0.342641682 | 1.54E-13 |
| RP11-320N7.2 | GABBR2     | 0.395439296 | 6.97E-18 |
| RP11-320N7.2 | DIRAS3     | 0.39574375  | 6.54E-18 |
| RP11-320N7.2 | SERINC2    | 0.631244887 | 3.53E-50 |
| RP11-320N7.2 | PTCHD4     | 0.316408541 | 1.16E-11 |
| RP11-320N7.2 | EPS8       | 0.292061621 | 4.42E-10 |
| RP11-320N7.2 | LY6E       | 0.453317873 | 1.24E-23 |
| RP11-320N7.2 | UPP1       | 0.453240075 | 1.26E-23 |
| RP11-320N7.2 | AHNAK2     | 0.423878006 | 1.43E-20 |
| RP11-320N7.2 | PLXNC1     | 0.35852695  | 9.21E-15 |
| RP11-320N7.2 | TNC        | 0.356334714 | 1.37E-14 |
| RP11-320N7.2 | DUSP4      | 0.327704241 | 1.90E-12 |
| RP11-320N7.2 | NRCAM      | 0.223716879 | 2.20E-06 |
| RP11-320N7.2 | NRP2       | 0.331625614 | 9.94E-13 |
| RP11-320N7.2 | CTSC       | 0.470623711 | 1.40E-25 |
| RP11-320N7.2 | AMIGO2     | 0.248565406 | 1.32E-07 |
| RP11-320N7.2 | NAB2       | 0.447610487 | 5.13E-23 |
| RP11-320N7.2 | TBC1D2     | 0.420916658 | 2.81E-20 |
| RP11-320N7.2 | PHLDA3     | 0.61576733  | 3.59E-47 |
| RP11-320N7.2 | PTP4A3     | 0.478184697 | 1.83E-26 |
| RP11-320N7.2 | CRABP2     | 0.468961592 | 2.18E-25 |
| RP11-320N7.2 | GOS2       | 0.474041846 | 5.62E-26 |
| RP11-320N7.2 | S100A6     | 0.592987073 | 4.89E-43 |
| RP11-320N7.2 | FOXQ1      | 0.232319942 | 8.60E-07 |

|              |         |             |             |
|--------------|---------|-------------|-------------|
| RP11-320N7.2 | LRG1    | 0.438640065 | 4.54E-22    |
| RP11-320N7.2 | LAMP5   | 0.30341278  | 8.43E-11    |
| RP11-320N7.2 | ALDH3B1 | 0.437506715 | 5.95E-22    |
| RP11-320N7.2 | CDH2    | 0.016853945 | 0.7247276   |
| RP11-320N7.2 | SCG5    | 0.356157985 | 1.42E-14    |
| RP11-320N7.2 | ZCCHC16 | 0.362671738 | 4.30E-15    |
| RP11-320N7.2 | GRB7    | 0.318949128 | 7.74E-12    |
| RP11-320N7.2 | TIAM1   | 0.180072302 | 0.000148701 |
| RP11-320N7.2 | FXYD5   | 0.443532455 | 1.39E-22    |
| RP11-320N7.2 | CLDN9   | 0.454776243 | 8.56E-24    |
| RP11-320N7.2 | FAM43A  | 0.469105061 | 2.10E-25    |
| RP11-320N7.2 | CHST2   | 0.212119633 | 7.37E-06    |
| RP11-320N7.2 | HMGA2   | 0.400530755 | 2.40E-18    |
| RP11-320N7.2 | GALNT7  | 0.444317453 | 1.15E-22    |
| RP11-320N7.2 | CBLN1   | 0.369426215 | 1.21E-15    |
| RP11-320N7.2 | STRA6   | 0.338846261 | 2.96E-13    |
| RP11-320N7.2 | MUC21   | 0.480751729 | 9.04E-27    |
| RP11-320N7.2 | PRR36   | 0.356802777 | 1.26E-14    |
| RP11-320N7.2 | NFE2L3  | 0.302509986 | 9.64E-11    |
| RP11-320N7.2 | NR1D1   | 0.348885284 | 5.20E-14    |
| RP11-320N7.2 | MUC1    | 0.416616297 | 7.36E-20    |
| RP11-320N7.2 | NAT8L   | 0.318237531 | 8.67E-12    |
| RP11-320N7.2 | APOC1   | 0.204750127 | 1.53E-05    |
| RP11-320N7.2 | EVA1A   | 0.310320463 | 2.97E-11    |
| RP11-320N7.2 | ENTPD1  | 0.221569464 | 2.76E-06    |
| RP11-320N7.2 | COL1A1  | 0.295925692 | 2.53E-10    |
| RP11-320N7.2 | FNDC4   | 0.487752962 | 1.29E-27    |
| RP11-320N7.2 | FRMD3   | 0.317113684 | 1.03E-11    |
| RP11-320N7.2 | SHROOM4 | 0.260856165 | 2.92E-08    |
| RP11-320N7.2 | NELL2   | 0.182844722 | 0.000116858 |
| RP11-320N7.2 | EPHB3   | 0.409495006 | 3.52E-19    |
| RP11-320N7.2 | TMC6    | 0.445521863 | 8.57E-23    |
| RP11-320N7.2 | NOD1    | 0.235139807 | 6.27E-07    |
| RP11-320N7.2 | GGCT    | 0.509853464 | 2.02E-30    |
| RP11-320N7.2 | ICAM1   | 0.301036582 | 1.20E-10    |
| RP11-320N7.2 | PRSS23  | 0.359874474 | 7.20E-15    |
| RP11-320N7.2 | CFI     | 0.319901352 | 6.66E-12    |
| RP11-320N7.2 | CD55    | 0.2990415   | 1.61E-10    |
| RP11-320N7.2 | RASD2   | 0.279837029 | 2.43E-09    |
| RP11-320N7.2 | KLK11   | 0.269813639 | 9.25E-09    |
| RP11-320N7.2 | ICAM5   | 0.323888466 | 3.52E-12    |
| RP11-320N7.2 | ADORA1  | 0.645306271 | 4.60E-53    |
| RP11-320N7.2 | ITGA2   | 0.223292927 | 2.30E-06    |
| RP11-320N7.2 | ABCC3   | 0.315519363 | 1.33E-11    |
| RP11-320N7.2 | MFGE8   | 0.56362011  | 3.60E-38    |
| RP11-320N7.2 | STK32A  | 0.444084982 | 1.22E-22    |
| RP11-320N7.2 | CYSLTR2 | 0.153635624 | 0.001242078 |
| RP11-320N7.2 | LAD1    | 0.514820177 | 4.42E-31    |
| RP11-320N7.2 | MGAT3   | 0.190490597 | 5.90E-05    |
| RP11-320N7.2 | IGFBP6  | 0.559596686 | 1.53E-37    |
| RP11-320N7.2 | CYP2S1  | 0.338436635 | 3.17E-13    |

|              |           |             |             |
|--------------|-----------|-------------|-------------|
| RP11-320N7.2 | KCNJ2     | 0.393807034 | 9.77E-18    |
| RP11-320N7.2 | FAM20A    | 0.367505882 | 1.74E-15    |
| RP11-320N7.2 | TGFA      | 0.422859118 | 1.81E-20    |
| RP11-320N7.2 | MXRA8     | 0.333290002 | 7.54E-13    |
| RP11-320N7.2 | C8orf4    | 0.29264365  | 4.07E-10    |
| RP11-320N7.2 | CLDN10    | 0.349749138 | 4.46E-14    |
| RP11-320N7.2 | PDE5A     | 0.327250291 | 2.04E-12    |
| RP11-320N7.2 | APOE      | 0.233261457 | 7.74E-07    |
| RP11-320N7.2 | SPOCK2    | 0.234819326 | 6.50E-07    |
| RP11-320N7.2 | TENM1     | 0.378355433 | 2.17E-16    |
| RP11-320N7.2 | SLIT1     | 0.386930697 | 3.96E-17    |
| RP11-320N7.2 | CXCL14    | 0.140150525 | 0.003254226 |
| RP11-320N7.2 | ECM1      | 0.417029681 | 6.71E-20    |
| RP11-320N7.2 | DUSP5     | 0.353144371 | 2.44E-14    |
| RP11-320N7.2 | SEZ6L2    | 0.377630645 | 2.50E-16    |
| RP11-320N7.2 | THRSP     | 0.645624979 | 3.95E-53    |
| RP11-320N7.2 | C19orf33  | 0.437016029 | 6.69E-22    |
| RP11-320N7.2 | MPZL2     | 0.397344312 | 4.69E-18    |
| RP11-320N7.2 | CTSH      | 0.572256293 | 1.50E-39    |
| RP11-320N7.2 | CYP1B1    | 0.376040438 | 3.41E-16    |
| RP11-320N7.2 | ALOX5     | 0.434187512 | 1.31E-21    |
| RP11-320N7.2 | SYTL5     | 0.284378666 | 1.30E-09    |
| RP11-320N7.2 | TNFRSF12A | 0.475079384 | 4.25E-26    |
| RP11-320N7.2 | DUSP6     | 0.404496593 | 1.04E-18    |
| RP11-320N7.2 | ALOX15B   | 0.498415856 | 6.05E-29    |
| RP11-320N7.2 | SDC4      | 0.368556186 | 1.43E-15    |
| RP11-320N7.2 | MDK       | 0.310323584 | 2.97E-11    |
| RP11-320N7.2 | KRT19     | 0.455858603 | 6.51E-24    |
| RP11-320N7.2 | MET       | 0.360478204 | 6.44E-15    |
| RP11-320N7.2 | TESC      | 0.344381173 | 1.14E-13    |
| RP11-320N7.2 | CXCL17    | 0.579378809 | 1.01E-40    |
| RP11-320N7.2 | NPC2      | 0.678336463 | 1.79E-60    |
| RP11-320N7.2 | COMP      | 0.312005844 | 2.29E-11    |
| RP11-320N7.2 | TUSC3     | 0.291850993 | 4.55E-10    |
| RP11-320N7.2 | TMPRSS4   | 0.3634487   | 3.72E-15    |
| RP11-320N7.2 | LGALS3    | 0.585159647 | 1.08E-41    |
| RP11-320N7.2 | CRLF1     | 0.223375264 | 2.28E-06    |
| RP11-320N7.2 | CTXN1     | 0.3715203   | 8.14E-16    |
| RP11-320N7.2 | PCSK1N    | 0.246559119 | 1.67E-07    |
| RP11-320N7.2 | NMU       | 0.345803849 | 8.92E-14    |
| RP11-320N7.2 | GALE      | 0.597265592 | 8.67E-44    |
| RP11-320N7.2 | PCSK2     | 0.258872784 | 3.74E-08    |
| RP11-320N7.2 | GJB3      | 0.448364351 | 4.25E-23    |
| RP11-320N7.2 | SLPI      | 0.455951719 | 6.36E-24    |
| RP11-320N7.2 | AGR2      | 0.254797093 | 6.20E-08    |
| RP11-320N7.2 | MRC2      | 0.417494765 | 6.05E-20    |
| RP11-320N7.2 | GOLT1A    | 0.556894546 | 4.02E-37    |
| RP11-320N7.2 | SLC27A6   | 0.170811545 | 0.000324204 |
| RP11-320N7.2 | KCNN4     | 0.464797891 | 6.52E-25    |
| RP11-320N7.2 | ETV4      | 0.280375027 | 2.26E-09    |
| RP11-320N7.2 | SYT12     | 0.43371562  | 1.46E-21    |

|              |          |              |          |
|--------------|----------|--------------|----------|
| RP11-320N7.2 | PVRL4    | 0.477618057  | 2.13E-26 |
| RP11-320N7.2 | PLCD3    | 0.457808651  | 3.96E-24 |
| RP11-320N7.2 | PLAU     | 0.582285387  | 3.31E-41 |
| RP11-320N7.2 | LRRK2    | 0.356822776  | 1.26E-14 |
| RP11-320N7.2 | SFN      | 0.476655125  | 2.77E-26 |
| RP11-320N7.2 | LPAR5    | 0.369026447  | 1.31E-15 |
| RP11-320N7.2 | NGEF     | 0.386571494  | 4.26E-17 |
| RP11-320N7.2 | DTX4     | 0.360735568  | 6.15E-15 |
| RP11-320N7.2 | CST6     | 0.43848525   | 4.71E-22 |
| RP11-320N7.2 | QPCT     | 0.376374252  | 3.20E-16 |
| RP11-320N7.2 | TIMP1    | 0.553210751  | 1.47E-36 |
| RP11-320N7.2 | CAMK2N1  | 0.359497187  | 7.72E-15 |
| RP11-320N7.2 | KLHDC8A  | 0.322708026  | 4.26E-12 |
| RP11-320N7.2 | PDLIM4   | 0.527740481  | 7.58E-33 |
| RP11-320N7.2 | SCEL     | 0.38087666   | 1.32E-16 |
| RP11-320N7.2 | LCN2     | 0.539389994  | 1.66E-34 |
| RP11-320N7.2 | PROS1    | 0.469048538  | 2.13E-25 |
| RP11-320N7.2 | GABRB2   | 0.336787211  | 4.19E-13 |
| RP11-320N7.2 | TMPRSS6  | 0.303199528  | 8.70E-11 |
| RP11-320N7.2 | KLK7     | 0.399031548  | 3.29E-18 |
| RP11-320N7.2 | PDZK1IP1 | 0.585123265  | 1.10E-41 |
| RP11-320N7.2 | CDH3     | 0.294083652  | 3.31E-10 |
| RP11-320N7.2 | LRP4     | 0.293765795  | 3.46E-10 |
| RP11-320N7.2 | IGSF1    | 0.188866349  | 6.84E-05 |
| RP11-320N7.2 | B3GNT3   | 0.441298803  | 2.39E-22 |
| RP11-320N7.2 | CLDN1    | 0.395995582  | 6.21E-18 |
| RP11-320N7.2 | GDF15    | 0.527372484  | 8.53E-33 |
| RP11-320N7.2 | ARHGAP36 | 0.25812555   | 4.11E-08 |
| RP11-320N7.2 | LAMB3    | 0.413049021  | 1.62E-19 |
| RP11-320N7.2 | KLK10    | 0.390458542  | 1.94E-17 |
| RP11-320N7.2 | DPP4     | 0.439306771  | 3.87E-22 |
| RP11-320N7.2 | METTL7B  | 0.594387077  | 2.78E-43 |
| RP11-320N7.2 | LIPH     | 0.476517188  | 2.88E-26 |
| RP11-320N7.2 | CLDN16   | 0.496266101  | 1.13E-28 |
| RP11-320N7.2 | CHI3L1   | 0.65189319   | 1.82E-54 |
| RP11-320N7.2 | SLC22A31 | 0.48434734   | 3.34E-27 |
| RP11-320N7.2 | TACSTD2  | 0.374691637  | 4.43E-16 |
| RP11-320N7.2 | SFTPB    | 0.451890636  | 1.77E-23 |
| RP11-320N7.2 | RXRG     | 0.420215912  | 3.29E-20 |
| RP11-320N7.2 | DCSTAMP  | 0.423989023  | 1.40E-20 |
| RP11-320N7.2 | CITED1   | 0.690345675  | 2.04E-63 |
| RP11-320N7.2 | SERPINA1 | 0.524639494  | 2.04E-32 |
| RP11-320N7.2 | PRR15    | 0.364742681  | 2.93E-15 |
| RP11-320N7.2 | SLC34A2  | 0.466029818  | 4.72E-25 |
| RP11-320N7.2 | FN1      | 0.4002841    | 2.53E-18 |
| RP11-320N7.2 | ZCCHC12  | 0.306094708  | 5.64E-11 |
| MIR181A2HG   | TFF3     | -0.279597296 | 2.94E-09 |
| MIR181A2HG   | CCL21    | -0.306112934 | 5.62E-11 |
| MIR181A2HG   | TPO      | -0.365363089 | 2.99E-15 |
| MIR181A2HG   | MT1G     | -0.333080249 | 1.05E-12 |
| MIR181A2HG   | DIO1     | -0.404752253 | 0        |

|            |           |              |             |
|------------|-----------|--------------|-------------|
| MIR181A2HG | DPT       | -0.340810635 | 2.11E-13    |
| MIR181A2HG | CDH16     | -0.397119004 | 0           |
| MIR181A2HG | CRABP1    | -0.272560098 | 6.45E-09    |
| MIR181A2HG | SLC26A7   | -0.300009078 | 1.72E-10    |
| MIR181A2HG | MT1H      | -0.361298513 | 5.54E-15    |
| MIR181A2HG | SLC26A4   | -0.323359441 | 5.06E-12    |
| MIR181A2HG | SLC5A8    | -0.439355439 | 3.82E-22    |
| MIR181A2HG | PKHD1L1   | -0.324373408 | 3.26E-12    |
| MIR181A2HG | TFCP2L1   | -0.414984384 | 0           |
| MIR181A2HG | WSCD2     | -0.401637808 | 1.90E-18    |
| MIR181A2HG | IPCEF1    | -0.410229152 | 0           |
| MIR181A2HG | SLC5A5    | -0.321332679 | 5.30E-12    |
| MIR181A2HG | MT1F      | -0.314786237 | 1.92E-11    |
| MIR181A2HG | FOSB      | -0.172462888 | 0.000288545 |
| MIR181A2HG | SEMA3D    | -0.407747868 | 5.15E-19    |
| MIR181A2HG | BMP8A     | -0.355348962 | 2.16E-14    |
| MIR181A2HG | MATN2     | -0.322189143 | 6.08E-12    |
| MIR181A2HG | PLA2R1    | -0.388491619 | 0           |
| MIR181A2HG | COL23A1   | -0.240068564 | 3.89E-07    |
| MIR181A2HG | HGD       | -0.413115821 | 0           |
| MIR181A2HG | TCEAL2    | -0.253757833 | 7.82E-08    |
| MIR181A2HG | CHRD1     | -0.361881    | 4.98E-15    |
| MIR181A2HG | TNFRSF11B | -0.369018232 | 1.36E-15    |
| MIR181A2HG | FAM167A   | -0.377583067 | 1.45E-16    |
| MIR181A2HG | KIT       | -0.385023843 | 0           |
| MIR181A2HG | SLC4A4    | -0.434918883 | 0           |
| MIR181A2HG | SMOC2     | -0.28467464  | 1.48E-09    |
| MIR181A2HG | FHL1      | -0.329374186 | 1.93E-12    |
| MIR181A2HG | OTOS      | -0.35985839  | 9.10E-15    |
| MIR181A2HG | IGFBPL1   | -0.478151051 | 1.84E-26    |
| MIR181A2HG | HBB       | -0.265803351 | 1.77E-08    |
| MIR181A2HG | BEX1      | -0.174147346 | 0.000251037 |
| MIR181A2HG | FABP4     | -0.350727391 | 3.75E-14    |
| MIR181A2HG | LMOD1     | -0.370808784 | 9.00E-16    |
| MIR181A2HG | SOD3      | -0.354158665 | 2.69E-14    |
| MIR181A2HG | TMEM171   | -0.336738937 | 5.74E-13    |
| MIR181A2HG | PI16      | -0.273468088 | 6.60E-09    |
| MIR181A2HG | ZMAT4     | -0.393828438 | 9.72E-18    |
| MIR181A2HG | MFAP4     | -0.229159587 | 1.31E-06    |
| MIR181A2HG | CWH43     | -0.369126183 | 1.28E-15    |
| MIR181A2HG | SPX       | -0.317435613 | 1.28E-11    |
| MIR181A2HG | APOD      | -0.23360845  | 8.02E-07    |
| MIR181A2HG | DPP6      | -0.342658936 | 2.10E-13    |
| MIR181A2HG | MMRN1     | -0.388515306 | 0           |
| MIR181A2HG | WDR72     | -0.299293084 | 1.91E-10    |
| MIR181A2HG | MPPED2    | -0.368352732 | 1.57E-15    |
| MIR181A2HG | PAPSS2    | -0.47879932  | 0           |
| MIR181A2HG | DCN       | -0.301631127 | 1.36E-10    |
| MIR181A2HG | SORBS2    | -0.395318382 | 0           |
| MIR181A2HG | EGR2      | -0.106277995 | 0.026005763 |
| MIR181A2HG | EDN3      | -0.151766335 | 0.001426253 |

|            |            |              |             |
|------------|------------|--------------|-------------|
| MIR181A2HG | DIO2       | -0.342211723 | 2.27E-13    |
| MIR181A2HG | ITPR1      | -0.450095456 | 0           |
| MIR181A2HG | CFD        | -0.23683255  | 5.60E-07    |
| MIR181A2HG | CPXM1      | -0.370131795 | 1.05E-15    |
| MIR181A2HG | ELM01      | -0.455583277 | 0           |
| MIR181A2HG | GPC3       | -0.364608954 | 3.00E-15    |
| MIR181A2HG | MYOC       | -0.09603064  | 0.044327739 |
| MIR181A2HG | DEPTOR     | -0.342961758 | 1.99E-13    |
| MIR181A2HG | DGKI       | -0.396547542 | 0           |
| MIR181A2HG | CARTPT     | -0.293051535 | 3.84E-10    |
| MIR181A2HG | IYD        | -0.339776096 | 3.44E-13    |
| MIR181A2HG | LYVE1      | -0.307833948 | 5.47E-11    |
| MIR181A2HG | CLCNKB     | -0.246681295 | 1.81E-07    |
| MIR181A2HG | NCAM1      | -0.5559773   | 0           |
| MIR181A2HG | HBA2       | -0.161284137 | 0.000704256 |
| MIR181A2HG | GLT8D2     | -0.402362723 | 0           |
| MIR181A2HG | OGDHL      | -0.374837951 | 3.27E-16    |
| MIR181A2HG | LIFR       | -0.4723063   | 0           |
| MIR181A2HG | CSGALNACT1 | -0.356039567 | 1.89E-14    |
| MIR181A2HG | RAP1GAP    | -0.291874151 | 5.48E-10    |
| MIR181A2HG | COL9A3     | -0.311321156 | 3.25E-11    |
| MIR181A2HG | FBLN1      | -0.320438731 | 8.01E-12    |
| MIR181A2HG | EFEMP1     | -0.308163436 | 5.21E-11    |
| MIR181A2HG | AOX1       | -0.491051655 | 5.05E-28    |
| MIR181A2HG | GRIN2C     | -0.358670504 | 1.15E-14    |
| MIR181A2HG | C11orf74   | -0.249802421 | 1.25E-07    |
| MIR181A2HG | PPARGC1A   | -0.425502033 | 0           |
| MIR181A2HG | ANGPTL1    | -0.353392035 | 3.10E-14    |
| MIR181A2HG | SCARA5     | -0.339543868 | 2.63E-13    |
| MIR181A2HG | LTF        | -0.35705044  | 1.56E-14    |
| MIR181A2HG | CA4        | -0.193740512 | 4.38E-05    |
| MIR181A2HG | TG         | -0.241419421 | 3.33E-07    |
| MIR181A2HG | FCGBP      | -0.237336497 | 5.29E-07    |
| MIR181A2HG | PBX4       | -0.154875368 | 0.001145905 |
| MIR181A2HG | CYR61      | -0.153907471 | 0.001231412 |
| MIR181A2HG | FOS        | -0.192899208 | 4.89E-05    |
| MIR181A2HG | KHDRBS2    | -0.238211632 | 4.79E-07    |
| MIR181A2HG | MUM1L1     | -0.349915323 | 5.84E-14    |
| MIR181A2HG | RGS16      | -0.361949069 | 6.02E-15    |
| MIR181A2HG | MT1M       | -0.320470502 | 7.97E-12    |
| MIR181A2HG | LRP2       | -0.298341498 | 2.19E-10    |
| MIR181A2HG | MAFB       | -0.425607418 | 0           |
| MIR181A2HG | KCNK2      | -0.337576769 | 4.98E-13    |
| MIR181A2HG | TBC1D4     | -0.428384589 | 0           |
| MIR181A2HG | MIOX       | -0.252043882 | 8.67E-08    |
| MIR181A2HG | TPPP       | -0.385014482 | 0           |
| MIR181A2HG | FMOD       | -0.506024532 | 0           |
| MIR181A2HG | CITED2     | -0.331565995 | 1.35E-12    |
| MIR181A2HG | RGS8       | -0.407038462 | 6.00E-19    |
| MIR181A2HG | ABI3BP     | -0.337612796 | 4.95E-13    |
| MIR181A2HG | ADH1B      | -0.296440051 | 2.35E-10    |



|            |          |              |             |
|------------|----------|--------------|-------------|
| MIR181A2HG | OGN      | -0.32632695  | 2.37E-12    |
| MIR181A2HG | NR4A1    | -0.16313809  | 0.0006097   |
| MIR181A2HG | FOXJ1    | -0.252148224 | 8.57E-08    |
| MIR181A2HG | ALDH1A1  | -0.250191906 | 1.20E-07    |
| MIR181A2HG | OCA2     | -0.286772343 | 9.33E-10    |
| MIR181A2HG | TMEM139  | -0.281212821 | 2.37E-09    |
| MIR181A2HG | ARHGAP24 | -0.516591115 | 0           |
| MIR181A2HG | SLC25A15 | -0.471952558 | 0           |
| MIR181A2HG | DES      | -0.241270713 | 3.11E-07    |
| MIR181A2HG | GDF10    | -0.402407724 | 1.62E-18    |
| MIR181A2HG | KIAA1324 | -0.404409433 | 0           |
| MIR181A2HG | JUN      | -0.205414491 | 1.50E-05    |
| MIR181A2HG | C7       | -0.20611006  | 1.40E-05    |
| MIR181A2HG | LGI3     | -0.371539103 | 7.56E-16    |
| MIR181A2HG | CDON     | -0.403964348 | 0           |
| MIR181A2HG | BCL2     | -0.392704607 | 0           |
| MIR181A2HG | HLF      | -0.3130632   | 2.49E-11    |
| MIR181A2HG | EGR1     | -0.142057404 | 0.002876213 |
| MIR181A2HG | IP6K3    | -0.333686461 | 9.53E-13    |
| MIR181A2HG | SCUBE3   | -0.35984605  | 9.12E-15    |
| MIR181A2HG | PKNOX2   | -0.281533231 | 2.27E-09    |
| MIR181A2HG | SMAD9    | -0.301306036 | 1.43E-10    |
| MIR181A2HG | IQGAP2   | -0.416749689 | 0           |
| MIR181A2HG | GNA14    | -0.345063642 | 1.38E-13    |
| MIR181A2HG | LAYN     | -0.347808616 | 8.52E-14    |
| MIR181A2HG | AVPR1A   | -0.426140158 | 0           |
| MIR181A2HG | PDLIM3   | -0.438919967 | 0           |
| MIR181A2HG | GPM6A    | -0.29454466  | 3.77E-10    |
| MIR181A2HG | SDPR     | -0.188540553 | 7.25E-05    |
| MIR181A2HG | CRYAB    | -0.281150838 | 2.39E-09    |
| MIR181A2HG | FOXA2    | -0.224306933 | 2.06E-06    |
| MIR181A2HG | C8orf88  | -0.338797136 | 4.06E-13    |
| MIR181A2HG | ISM1     | -0.305298468 | 7.97E-11    |
| MIR181A2HG | BMP2     | -0.231427137 | 1.02E-06    |
| MIR181A2HG | ID4      | -0.259279836 | 3.99E-08    |
| MIR181A2HG | NUPR1    | -0.289935237 | 7.19E-10    |
| MIR181A2HG | SERTM1   | -0.370769355 | 9.40E-16    |
| MIR181A2HG | IRS1     | -0.311321156 | 3.25E-11    |
| MIR181A2HG | FIBIN    | -0.424151034 | 0           |
| MIR181A2HG | PODN     | -0.282766789 | 1.92E-09    |
| MIR181A2HG | TDRD9    | -0.285585234 | 1.31E-09    |
| MIR181A2HG | EPHA3    | -0.423827078 | 0           |
| MIR181A2HG | AIF1L    | -0.171219402 | 0.000319525 |
| MIR181A2HG | EBF4     | -0.275804713 | 4.86E-09    |
| MIR181A2HG | ADM2     | -0.389581637 | 0           |
| MIR181A2HG | GSTM3    | -0.30588156  | 7.31E-11    |
| MIR181A2HG | HSD17B6  | -0.147767058 | 0.001925679 |
| MIR181A2HG | AGR3     | -0.20445504  | 1.58E-05    |
| MIR181A2HG | EPHB1    | -0.37655801  | 2.00E-16    |
| MIR181A2HG | TMOD1    | -0.421958515 | 0           |
| MIR181A2HG | WASF3    | -0.368056292 | 1.68E-15    |

|            |          |              |             |
|------------|----------|--------------|-------------|
| MIR181A2HG | SELV     | -0.298942792 | 1.63E-10    |
| MIR181A2HG | ENPP1    | -0.282907065 | 1.88E-09    |
| MIR181A2HG | SYNE1    | -0.446597272 | 6.58E-23    |
| MIR181A2HG | PLCH1    | -0.451869413 | 0           |
| MIR181A2HG | CCDC146  | -0.290025729 | 7.10E-10    |
| MIR181A2HG | SLC16A2  | -0.415892    | 0           |
| MIR181A2HG | IER2     | -0.143263587 | 0.002645562 |
| MIR181A2HG | KCNAB1   | -0.137111827 | 0.004025832 |
| MIR181A2HG | SYNDIG1  | -0.427468037 | 0           |
| MIR181A2HG | C16orf89 | -0.174287481 | 0.000248131 |
| MIR181A2HG | CTGF     | -0.075893645 | 0.112285113 |
| MIR181A2HG | NR4A3    | -0.228021769 | 1.48E-06    |
| MIR181A2HG | KIAA1456 | -0.199252802 | 2.71E-05    |
| MIR181A2HG | AQP4     | -0.321080544 | 7.24E-12    |
| MIR181A2HG | RNF150   | -0.483946164 | 0           |
| MIR181A2HG | C1S      | -0.300921374 | 1.51E-10    |
| MIR181A2HG | PFKFB2   | -0.41469305  | 0           |
| MIR181A2HG | PROX1    | -0.443429253 | 0           |
| MIR181A2HG | TCF7L1   | -0.369835923 | 1.13E-15    |
| MIR181A2HG | HSPB6    | -0.230095854 | 1.18E-06    |
| MIR181A2HG | FHDC1    | -0.26448767  | 2.09E-08    |
| MIR181A2HG | PRR15L   | -0.348862608 | 7.06E-14    |
| MIR181A2HG | SLC1A1   | -0.406528479 | 0           |
| MIR181A2HG | BTBD11   | -0.26102727  | 3.22E-08    |
| MIR181A2HG | TRIM58   | -0.450219422 | 0           |
| MIR181A2HG | LRIG1    | -0.42573961  | 0           |
| MIR181A2HG | ROR2     | -0.357481058 | 1.44E-14    |
| MIR181A2HG | GPR125   | -0.350729043 | 5.04E-14    |
| MIR181A2HG | FLRT1    | -0.327853408 | 2.47E-12    |
| MIR181A2HG | PGF      | -0.237148847 | 5.40E-07    |
| MIR181A2HG | DUSP1    | -0.15903304  | 0.000837295 |
| MIR181A2HG | PLA2G7   | -0.33070703  | 1.55E-12    |
| MIR181A2HG | PLSCR4   | -0.342763328 | 2.06E-13    |
| MIR181A2HG | FAM46B   | -0.306441391 | 6.73E-11    |
| MIR181A2HG | GLDC     | -0.38047158  | 4.68E-17    |
| MIR181A2HG | ZBTB16   | -0.280404349 | 2.64E-09    |
| MIR181A2HG | OMD      | -0.307330735 | 4.68E-11    |
| MIR181A2HG | HSD11B2  | -0.254828703 | 6.87E-08    |
| MIR181A2HG | FGL2     | -0.363909542 | 4.05E-15    |
| MIR181A2HG | CLCNKA   | -0.276188392 | 3.98E-09    |
| MIR181A2HG | GATM     | -0.230803763 | 1.09E-06    |
| MIR181A2HG | TNS3     | -0.463991949 | 0           |
| MIR181A2HG | TOB1     | -0.417842686 | 0           |
| MIR181A2HG | MARC2    | -0.294543526 | 3.77E-10    |
| MIR181A2HG | LRRC2    | -0.301298661 | 1.43E-10    |
| MIR181A2HG | SORD     | -0.225672379 | 1.90E-06    |
| MIR181A2HG | RIMS4    | -0.306335865 | 6.84E-11    |
| MIR181A2HG | SLC29A4  | -0.328252964 | 2.31E-12    |
| MIR181A2HG | SLC39A14 | -0.457579493 | 0           |
| MIR181A2HG | FAXDC2   | -0.255082592 | 6.67E-08    |
| MIR181A2HG | HSPB8    | -0.3765078   | 2.03E-16    |

|            |          |              |             |
|------------|----------|--------------|-------------|
| MIR181A2HG | CCL19    | -0.132609357 | 0.005388325 |
| MIR181A2HG | KCNIP3   | -0.257964297 | 4.69E-08    |
| MIR181A2HG | CGNL1    | -0.329037181 | 2.04E-12    |
| MIR181A2HG | ATF3     | -0.064460863 | 0.177538654 |
| MIR181A2HG | SGCD     | -0.356362956 | 1.78E-14    |
| MIR181A2HG | STARD13  | -0.341573456 | 2.53E-13    |
| MIR181A2HG | LDHD     | -0.311355055 | 3.23E-11    |
| MIR181A2HG | RCAN1    | -0.284032118 | 1.62E-09    |
| MIR181A2HG | ID3      | -0.273168386 | 6.87E-09    |
| MIR181A2HG | SYTL3    | -0.352294357 | 3.79E-14    |
| MIR181A2HG | MT1E     | -0.219889112 | 3.50E-06    |
| MIR181A2HG | CAMK1D   | -0.419562177 | 0           |
| MIR181A2HG | PRKCQ    | -0.294890176 | 3.59E-10    |
| MIR181A2HG | NUAK2    | -0.385645089 | 0           |
| MIR181A2HG | LIPG     | -0.162658538 | 0.000632958 |
| MIR181A2HG | SLC25A25 | -0.353488342 | 3.05E-14    |
| MIR181A2HG | PRKX     | -0.244423106 | 2.36E-07    |
| MIR181A2HG | SRPX     | -0.302077347 | 1.28E-10    |
| MIR181A2HG | FAM189A1 | -0.318105793 | 1.15E-11    |
| MIR181A2HG | PLEKHH1  | -0.170853604 | 0.000329214 |
| MIR181A2HG | WNT11    | -0.329175756 | 1.99E-12    |
| MIR181A2HG | SNAI1    | -0.340777324 | 2.90E-13    |
| MIR181A2HG | FDCSP    | -0.150593102 | 0.00155433  |
| MIR181A2HG | MT1X     | -0.133058973 | 0.005262253 |
| MIR181A2HG | ACACB    | -0.362858671 | 5.01E-15    |
| MIR181A2HG | ARC      | -0.025029431 | 0.600830914 |
| MIR181A2HG | KLK4     | -0.351274168 | 3.40E-14    |
| MIR181A2HG | ZFPM2    | -0.346709379 | 1.03E-13    |
| MIR181A2HG | AKAP12   | -0.289045635 | 8.13E-10    |
| MIR181A2HG | GJB6     | -0.267214101 | 1.30E-08    |
| MIR181A2HG | ERO1LB   | -0.32707841  | 2.80E-12    |
| MIR181A2HG | DNALI1   | -0.242111728 | 3.08E-07    |
| MIR181A2HG | HKDC1    | -0.477942624 | 0           |
| MIR181A2HG | ZFP36L2  | -0.265563221 | 1.82E-08    |
| MIR181A2HG | CAPSL    | -0.360080386 | 6.93E-15    |
| MIR181A2HG | CYP7B1   | -0.486384912 | 0           |
| MIR181A2HG | CPQ      | -0.263306309 | 2.42E-08    |
| MIR181A2HG | RPS6KA6  | -0.307117469 | 4.83E-11    |
| MIR181A2HG | TLE1     | -0.472182051 | 0           |
| MIR181A2HG | TP53INP2 | -0.352364283 | 3.75E-14    |
| MIR181A2HG | KATNAL2  | -0.278474371 | 3.42E-09    |
| MIR181A2HG | SGPP2    | -0.533210455 | 0           |
| MIR181A2HG | CTH      | -0.456225232 | 0           |
| MIR181A2HG | KIF12    | -0.001081508 | 0.981966674 |
| MIR181A2HG | TMEM220  | -0.329857142 | 1.79E-12    |
| MIR181A2HG | CENPJ    | -0.280277547 | 2.68E-09    |
| MIR181A2HG | FAM155B  | -0.227401657 | 1.58E-06    |
| MIR181A2HG | WFS1     | -0.388449493 | 0           |
| MIR181A2HG | SELENBP1 | -0.263092276 | 2.49E-08    |
| MIR181A2HG | SNTA1    | -0.261764539 | 2.93E-08    |
| MIR181A2HG | FRAS1    | -0.254459643 | 7.19E-08    |

|            |          |              |             |
|------------|----------|--------------|-------------|
| MIR181A2HG | FBLN7    | -0.447883932 | 0           |
| MIR181A2HG | AGPAT9   | -0.23212299  | 9.45E-07    |
| MIR181A2HG | GPR83    | -0.185629629 | 9.39E-05    |
| MIR181A2HG | PRTG     | -0.303942647 | 9.73E-11    |
| MIR181A2HG | EGR3     | -0.155253789 | 0.001113989 |
| MIR181A2HG | GRAMD2   | -0.252029122 | 9.63E-08    |
| MIR181A2HG | HYOU1    | -0.476300008 | 0           |
| MIR181A2HG | FBLN5    | -0.316932942 | 1.38E-11    |
| MIR181A2HG | ITM2A    | -0.286165915 | 1.21E-09    |
| MIR181A2HG | SRF      | -0.224085363 | 2.25E-06    |
| MIR181A2HG | FGFR2    | -0.144698128 | 0.002393261 |
| MIR181A2HG | MT1A     | -0.2409408   | 3.23E-07    |
| MIR181A2HG | MAMDC2   | -0.31894164  | 1.01E-11    |
| MIR181A2HG | FHL2     | -0.44388143  | 0           |
| MIR181A2HG | FTCDNL1  | -0.341678841 | 2.48E-13    |
| MIR181A2HG | PKIA     | -0.186826876 | 8.45E-05    |
| MIR181A2HG | DNAJB4   | -0.207730124 | 1.20E-05    |
| MIR181A2HG | SLC25A33 | -0.411425123 | 0           |
| MIR181A2HG | EYA2     | -0.327217127 | 2.73E-12    |
| MIR181A2HG | LPAR1    | -0.421897667 | 0           |
| MIR181A2HG | STX11    | -0.35123299  | 4.60E-14    |
| MIR181A2HG | ARHGEF28 | -0.342840913 | 2.03E-13    |
| MIR181A2HG | OR2W3    | -0.351254408 | 4.59E-14    |
| MIR181A2HG | ALDH1B1  | -0.535911691 | 5.29E-34    |
| MIR181A2HG | CXCL12   | -0.350311474 | 5.44E-14    |
| MIR181A2HG | OLFM2    | -0.248985155 | 1.38E-07    |
| MIR181A2HG | TUB      | -0.218964334 | 3.85E-06    |
| MIR181A2HG | HTRA3    | -0.216276094 | 5.07E-06    |
| MIR181A2HG | CKB      | -0.252392083 | 9.22E-08    |
| MIR181A2HG | RGS2     | -0.260721752 | 3.34E-08    |
| MIR181A2HG | SHANK2   | -0.307413969 | 5.83E-11    |
| MIR181A2HG | CNTFR    | -0.344945595 | 1.04E-13    |
| MIR181A2HG | CYTH3    | -0.420883957 | 0           |
| MIR181A2HG | PLAC9    | -0.110329998 | 0.02081137  |
| MIR181A2HG | WWOX     | -0.272986125 | 7.03E-09    |
| MIR181A2HG | NPR3     | -0.297337717 | 2.53E-10    |
| MIR181A2HG | SDC2     | -0.16580945  | 0.000494017 |
| MIR181A2HG | KLF15    | -0.159313593 | 0.000819531 |
| MIR181A2HG | TMEM164  | -0.532501837 | 0           |
| MIR181A2HG | LONRF3   | -0.171576832 | 0.000310316 |
| MIR181A2HG | GBP1     | -0.206666203 | 1.33E-05    |
| MIR181A2HG | ARHGAP6  | -0.288983368 | 8.20E-10    |
| MIR181A2HG | TMEM119  | -0.294027664 | 4.05E-10    |
| MIR181A2HG | SH3RF1   | -0.406439264 | 0           |
| MIR181A2HG | CRELD2   | -0.286469305 | 1.16E-09    |
| MIR181A2HG | PCP4     | -0.053400971 | 0.264102215 |
| MIR181A2HG | GCSH     | -0.261072232 | 3.20E-08    |
| MIR181A2HG | IMPA2    | -0.256375579 | 5.70E-08    |
| MIR181A2HG | C1R      | -0.261426116 | 3.06E-08    |
| MIR181A2HG | SUCNR1   | -0.339982753 | 3.32E-13    |
| MIR181A2HG | SFRP1    | -0.411282718 | 0           |

|            |          |              |             |
|------------|----------|--------------|-------------|
| MIR181A2HG | UGT8     | -0.500727483 | 0           |
| MIR181A2HG | TLE4     | -0.371229189 | 8.15E-16    |
| MIR181A2HG | ANTXR1   | -0.447734861 | 0           |
| MIR181A2HG | GPX3     | -0.248839489 | 1.41E-07    |
| MIR181A2HG | DPY19L2  | -0.178843148 | 0.000169139 |
| MIR181A2HG | FAM46C   | -0.45302028  | 0           |
| MIR181A2HG | IL33     | -0.30486623  | 6.78E-11    |
| MIR181A2HG | PEG3     | -0.367157329 | 2.04E-15    |
| MIR181A2HG | FAHD2A   | -0.193219901 | 4.75E-05    |
| MIR181A2HG | PTGDS    | -0.119204606 | 0.012479484 |
| MIR181A2HG | CHCHD10  | -0.247089077 | 1.73E-07    |
| MIR181A2HG | CD36     | -0.339881055 | 3.38E-13    |
| MIR181A2HG | ANKRD37  | -0.138235177 | 0.0037332   |
| MIR181A2HG | TSPAN33  | -0.443521022 | 0           |
| MIR181A2HG | PRDM16   | -0.241127236 | 3.44E-07    |
| MIR181A2HG | UST      | -0.274677817 | 5.64E-09    |
| MIR181A2HG | NEXN     | -0.360151709 | 8.59E-15    |
| MIR181A2HG | NUPR1L   | -0.061563365 | 0.197941128 |
| MIR181A2HG | SLC24A3  | -0.537052539 | 0           |
| MIR181A2HG | MARC1    | -0.223643682 | 2.36E-06    |
| MIR181A2HG | MYH11    | -0.201778921 | 2.13E-05    |
| MIR181A2HG | APOA1    | -0.243934131 | 2.28E-07    |
| MIR181A2HG | TMEM178B | -0.427554558 | 0           |
| MIR181A2HG | CAPN6    | -0.252342336 | 8.37E-08    |
| MIR181A2HG | PPM1L    | -0.472741598 | 0           |
| MIR181A2HG | FZD8     | -0.340406278 | 3.09E-13    |
| MIR181A2HG | RCAN2    | -0.387806404 | 0           |
| MIR181A2HG | COPZ2    | -0.328533943 | 2.21E-12    |
| MIR181A2HG | GAS1     | -0.377976523 | 1.27E-16    |
| MIR181A2HG | DACT1    | -0.299122879 | 1.96E-10    |
| MIR181A2HG | WBSCR17  | -0.248806299 | 1.41E-07    |
| MIR181A2HG | NCS1     | -0.258177762 | 4.57E-08    |
| MIR181A2HG | SPIRE2   | -0.2345094   | 7.26E-07    |
| MIR181A2HG | C15orf52 | -0.422751385 | 0           |
| MIR181A2HG | SPAG5    | -0.405895319 | 0           |
| MIR181A2HG | ARL4D    | -0.378221334 | 1.17E-16    |
| MIR181A2HG | FAM189A2 | -0.05238414  | 0.273314806 |
| MIR181A2HG | MAP1LC3A | -0.172685856 | 0.000283295 |
| MIR181A2HG | KLF6     | -0.065658536 | 0.169607627 |
| MIR181A2HG | ADD3     | -0.383648448 | 0           |
| MIR181A2HG | TSPAN7   | -0.245950266 | 1.97E-07    |
| MIR181A2HG | KLF9     | -0.205291092 | 1.52E-05    |
| MIR181A2HG | KCNQ1    | -0.298233277 | 2.23E-10    |
| MIR181A2HG | MAN1A1   | -0.376582406 | 1.98E-16    |
| MIR181A2HG | MLF1     | -0.198422204 | 2.93E-05    |
| MIR181A2HG | RARB     | -0.379538575 | 7.10E-17    |
| MIR181A2HG | CDC42EP2 | -0.255254498 | 6.53E-08    |
| MIR181A2HG | FAM3B    | -0.206458837 | 1.36E-05    |
| MIR181A2HG | GADD45B  | -0.045882184 | 0.337369982 |
| MIR181A2HG | TMEM47   | -0.343089128 | 1.95E-13    |
| MIR181A2HG | SDF2L1   | -0.196372232 | 3.55E-05    |

|            |          |              |             |
|------------|----------|--------------|-------------|
| MIR181A2HG | CCDC85A  | -0.303810596 | 9.92E-11    |
| MIR181A2HG | CRYBG3   | -0.36830011  | 1.59E-15    |
| MIR181A2HG | FBLN2    | -0.241280279 | 3.38E-07    |
| MIR181A2HG | PEBP4    | -0.15158191  | 0.00146143  |
| MIR181A2HG | CDADC1   | -0.289404341 | 7.74E-10    |
| MIR181A2HG | FAM63A   | -0.460005049 | 0           |
| MIR181A2HG | GLUL     | -0.386720924 | 0           |
| MIR181A2HG | FREM2    | -0.331877753 | 1.28E-12    |
| MIR181A2HG | ACKR3    | -0.271463362 | 8.57E-09    |
| MIR181A2HG | DENND6A  | -0.376469362 | 2.05E-16    |
| MIR181A2HG | CLDN8    | -0.252794475 | 8.78E-08    |
| MIR181A2HG | UTS2R    | -0.115338729 | 0.015614714 |
| MIR181A2HG | SCNN1B   | -0.141762809 | 0.00293526  |
| MIR181A2HG | TTC30A   | -0.474753416 | 0           |
| MIR181A2HG | CORO2B   | -0.353539404 | 3.02E-14    |
| MIR181A2HG | TC2N     | -0.515123951 | 0           |
| MIR181A2HG | ALDH2    | -0.461617596 | 0           |
| MIR181A2HG | GPR183   | -0.179318444 | 0.000162423 |
| MIR181A2HG | C4orf47  | -0.13289118  | 0.005320133 |
| MIR181A2HG | SLC25A42 | -0.224341805 | 2.19E-06    |
| MIR181A2HG | LGMN     | -0.47460392  | 0           |
| MIR181A2HG | ACSF2    | -0.332141712 | 1.23E-12    |
| MIR181A2HG | KIAA1467 | -0.444966058 | 0           |
| MIR181A2HG | PRKG1    | -0.33538723  | 7.19E-13    |
| MIR181A2HG | GNAI1    | -0.373043144 | 5.23E-16    |
| MIR181A2HG | ABCC4    | -0.463769974 | 0           |
| MIR181A2HG | PRPS1    | -0.494096029 | 0           |
| MIR181A2HG | TSPAN5   | -0.375273391 | 2.90E-16    |
| MIR181A2HG | CR2      | -0.207454705 | 1.18E-05    |
| MIR181A2HG | CCDC170  | -0.363376093 | 4.51E-15    |
| MIR181A2HG | RRAD     | -0.164180451 | 0.000561855 |
| MIR181A2HG | SCGB2A1  | -0.245886298 | 1.99E-07    |
| MIR181A2HG | SESN3    | -0.396406414 | 0           |
| MIR181A2HG | SGK223   | -0.235883092 | 6.23E-07    |
| MIR181A2HG | NDRG2    | -0.372157513 | 6.51E-16    |
| MIR181A2HG | C3orf52  | -0.335382407 | 7.20E-13    |
| MIR181A2HG | FLRT3    | 0.281878746  | 2.17E-09    |
| MIR181A2HG | MST1R    | 0.355286412  | 2.18E-14    |
| MIR181A2HG | SDC1     | 0.088328648  | 0.064469752 |
| MIR181A2HG | ST8SIA4  | 0.129878417  | 0.006461704 |
| MIR181A2HG | UBTD1    | 0.547953858  | 0           |
| MIR181A2HG | EPHA2    | 0.329259014  | 1.97E-12    |
| MIR181A2HG | TMEM130  | 0.462939801  | 0           |
| MIR181A2HG | SPINK2   | 0.269113972  | 1.16E-08    |
| MIR181A2HG | MMP16    | 0.270404406  | 9.82E-09    |
| MIR181A2HG | SIGLEC15 | 0.449076073  | 0           |
| MIR181A2HG | RIN1     | 0.47921618   | 0           |
| MIR181A2HG | IL1RN    | 0.147128224  | 0.002015489 |
| MIR181A2HG | FCER1G   | 0.078287288  | 0.101378816 |
| MIR181A2HG | CD276    | 0.314796733  | 1.91E-11    |
| MIR181A2HG | CTSB     | 0.346096642  | 1.15E-13    |

|            |          |             |             |
|------------|----------|-------------|-------------|
| MIR181A2HG | FAM171A2 | 0.382919122 | 5.86E-18    |
| MIR181A2HG | ASPHD1   | 0.353893429 | 2.83E-14    |
| MIR181A2HG | C15orf48 | 0.148342349 | 0.001847955 |
| MIR181A2HG | DYSF     | 0.172153683 | 0.000295975 |
| MIR181A2HG | PDZRN4   | 0.305909502 | 7.28E-11    |
| MIR181A2HG | EFHD2    | 0.366409989 | 2.40E-15    |
| MIR181A2HG | ASF1B    | 0.162481384 | 0.000641756 |
| MIR181A2HG | AQP1     | 0.271270889 | 8.78E-09    |
| MIR181A2HG | ARRDC2   | 0.660180076 | 0           |
| MIR181A2HG | PRSS1    | 0.404308432 | 1.08E-18    |
| MIR181A2HG | MAPK13   | 0.240792926 | 3.58E-07    |
| MIR181A2HG | CST5     | 0.364805447 | 2.89E-15    |
| MIR181A2HG | AHR      | 0.238954433 | 4.41E-07    |
| MIR181A2HG | BAX      | 0.32164846  | 6.62E-12    |
| MIR181A2HG | C1orf115 | 0.487742861 | 0           |
| MIR181A2HG | PLK3     | 0.400876695 | 0           |
| MIR181A2HG | JAG2     | 0.424558957 | 0           |
| MIR181A2HG | RAD23B   | 0.440250399 | 0           |
| MIR181A2HG | CA12     | 0.106497417 | 0.025698241 |
| MIR181A2HG | ADTRP    | 0.429499854 | 0           |
| MIR181A2HG | UCP2     | 0.411276052 | 0           |
| MIR181A2HG | IGFBP2   | 0.438633314 | 0           |
| MIR181A2HG | LOXL2    | 0.184914203 | 0.000100037 |
| MIR181A2HG | GPX1     | 0.357837069 | 1.35E-14    |
| MIR181A2HG | P3H3     | 0.483472145 | 0           |
| MIR181A2HG | C2orf81  | 0.51277754  | 0           |
| MIR181A2HG | CDT1     | 0.325311403 | 3.71E-12    |
| MIR181A2HG | SNX25    | 0.3647895   | 3.38E-15    |
| MIR181A2HG | MTHFD1L  | 0.350889744 | 4.90E-14    |
| MIR181A2HG | CDC42BPG | 0.339117345 | 2.82E-13    |
| MIR181A2HG | MSN      | 0.338340137 | 4.38E-13    |
| MIR181A2HG | SIGLEC6  | 0.317624082 | 9.54E-12    |
| MIR181A2HG | F2R      | 0.116228721 | 0.014867478 |
| MIR181A2HG | TMEM184A | 0.372937334 | 5.37E-16    |
| MIR181A2HG | CKS2     | 0.242301081 | 3.01E-07    |
| MIR181A2HG | TAX1BP3  | 0.452205284 | 0           |
| MIR181A2HG | PMEP A1  | 0.342540785 | 2.14E-13    |
| MIR181A2HG | CXCL16   | 0.212455002 | 7.48E-06    |
| MIR181A2HG | FAXC     | 0.408609939 | 0           |
| MIR181A2HG | VTCN1    | 0.210533314 | 8.65E-06    |
| MIR181A2HG | SH2D4A   | 0.310266172 | 3.80E-11    |
| MIR181A2HG | RNF24    | 0.39962172  | 0           |
| MIR181A2HG | LY6G6C   | 0.360495792 | 6.42E-15    |
| MIR181A2HG | NID1     | 0.122748123 | 0.010082787 |
| MIR181A2HG | STAC     | 0.278405864 | 3.45E-09    |
| MIR181A2HG | RAB34    | 0.612826048 | 0           |
| MIR181A2HG | HES4     | 0.45349047  | 0           |
| MIR181A2HG | EPHA10   | 0.408982262 | 0           |
| MIR181A2HG | ENTPD2   | 0.537813779 | 0           |
| MIR181A2HG | DDB2     | 0.369913366 | 1.11E-15    |
| MIR181A2HG | NKAIN4   | 0.424428609 | 0           |

|            |          |             |             |
|------------|----------|-------------|-------------|
| MIR181A2HG | TRIM29   | 0.321761504 | 6.51E-12    |
| MIR181A2HG | ADCY8    | 0.337640731 | 3.63E-13    |
| MIR181A2HG | SFTA2    | 0.311859428 | 2.99E-11    |
| MIR181A2HG | NRIP1    | 0.226026972 | 1.83E-06    |
| MIR181A2HG | VWA1     | 0.330235279 | 1.68E-12    |
| MIR181A2HG | APLNR    | 0.162657971 | 0.000632986 |
| MIR181A2HG | REN      | 0.441568805 | 2.24E-22    |
| MIR181A2HG | EDIL3    | 0.162855834 | 0.000623291 |
| MIR181A2HG | AGRN     | 0.384441034 | 0           |
| MIR181A2HG | TREM1    | 0.174544206 | 0.00024289  |
| MIR181A2HG | SRL      | 0.257676793 | 4.86E-08    |
| MIR181A2HG | RASGRF1  | 0.455276909 | 0           |
| MIR181A2HG | RMI2     | 0.333534269 | 9.78E-13    |
| MIR181A2HG | SAMD1    | 0.463432686 | 0           |
| MIR181A2HG | MGAT4B   | 0.460420207 | 0           |
| MIR181A2HG | NXN      | 0.319740892 | 8.93E-12    |
| MIR181A2HG | SH3BGRL3 | 0.291218296 | 6.01E-10    |
| MIR181A2HG | CA11     | 0.49762976  | 0           |
| MIR181A2HG | PLD3     | 0.413421906 | 0           |
| MIR181A2HG | LURAP1L  | 0.234117504 | 7.58E-07    |
| MIR181A2HG | CARNS1   | 0.495821762 | 0           |
| MIR181A2HG | PDLIM7   | 0.426312206 | 0           |
| MIR181A2HG | BCL2L1   | 0.276468511 | 4.46E-09    |
| MIR181A2HG | GGT6     | 0.373119027 | 5.13E-16    |
| MIR181A2HG | DPYSL3   | 0.268613287 | 1.24E-08    |
| MIR181A2HG | FYN      | 0.341774581 | 2.44E-13    |
| MIR181A2HG | TK1      | 0.137910796 | 0.003815656 |
| MIR181A2HG | AK1      | 0.40089329  | 0           |
| MIR181A2HG | HIGD1B   | 0.402713486 | 0           |
| MIR181A2HG | TMEM59L  | 0.348035414 | 8.18E-14    |
| MIR181A2HG | MEGF9    | 0.346275073 | 1.12E-13    |
| MIR181A2HG | ZFP36L1  | 0.312145088 | 2.87E-11    |
| MIR181A2HG | ADRA1B   | 0.263504313 | 2.36E-08    |
| MIR181A2HG | EPHA4    | 0.269292828 | 1.13E-08    |
| MIR181A2HG | TCERG1L  | 0.442863465 | 0           |
| MIR181A2HG | NGFR     | 0.371964614 | 6.83E-16    |
| MIR181A2HG | EBI3     | 0.226710343 | 1.70E-06    |
| MIR181A2HG | S100A10  | 0.12689388  | 0.007804596 |
| MIR181A2HG | S100B    | 0.199999433 | 2.52E-05    |
| MIR181A2HG | CD44     | 0.31880888  | 1.03E-11    |
| MIR181A2HG | BHLHE41  | 0.412411884 | 0           |
| MIR181A2HG | FBXO2    | 0.444944215 | 0           |
| MIR181A2HG | SLC30A2  | 0.227268472 | 1.60E-06    |
| MIR181A2HG | FRMD5    | 0.200857689 | 2.33E-05    |
| MIR181A2HG | SAMD11   | 0.466019511 | 0           |
| MIR181A2HG | SIPA1L2  | 0.359963207 | 8.92E-15    |
| MIR181A2HG | S100A16  | 0.339473274 | 3.62E-13    |
| MIR181A2HG | PPL      | 0.27717954  | 4.06E-09    |
| MIR181A2HG | ARHGD1B  | 0.313062632 | 2.49E-11    |
| MIR181A2HG | CDC42EP3 | 0.279331635 | 3.05E-09    |
| MIR181A2HG | RUNX2    | 0.396917595 | 0           |



|            |          |             |             |
|------------|----------|-------------|-------------|
| MIR181A2HG | LAMC2    | 0.213962305 | 6.42E-06    |
| MIR181A2HG | BRINP1   | 0.388183123 | 0           |
| MIR181A2HG | GPRC5B   | 0.44554447  | 0           |
| MIR181A2HG | AQP5     | 0.322388991 | 5.90E-12    |
| MIR181A2HG | PLAG1    | 0.504526732 | 0           |
| MIR181A2HG | PTPRU    | 0.342715103 | 2.08E-13    |
| MIR181A2HG | ANGPTL4  | 0.20276937  | 1.94E-05    |
| MIR181A2HG | PALM3    | 0.445009602 | 0           |
| MIR181A2HG | ACP5     | 0.184459331 | 0.000104111 |
| MIR181A2HG | DLG4     | 0.478546425 | 0           |
| MIR181A2HG | ETNK2    | 0.489848858 | 0           |
| MIR181A2HG | CD109    | 0.323148813 | 5.23E-12    |
| MIR181A2HG | SNX22    | 0.475909672 | 0           |
| MIR181A2HG | TMEM98   | 0.483530723 | 0           |
| MIR181A2HG | CTHRC1   | 0.125172119 | 0.008688052 |
| MIR181A2HG | S100A2   | 0.260987981 | 3.23E-08    |
| MIR181A2HG | C11orf80 | 0.450179991 | 0           |
| MIR181A2HG | SREBF1   | 0.35550243  | 2.09E-14    |
| MIR181A2HG | PRSS22   | 0.460024907 | 0           |
| MIR181A2HG | CMTM3    | 0.275154815 | 5.30E-09    |
| MIR181A2HG | RDH5     | 0.529816293 | 0           |
| MIR181A2HG | MYH10    | 0.187933064 | 7.66E-05    |
| MIR181A2HG | EVPL     | 0.402487256 | 0           |
| MIR181A2HG | SCD      | 0.150491324 | 0.001582364 |
| MIR181A2HG | CD151    | 0.491316447 | 0           |
| MIR181A2HG | S100A4   | 0.237858742 | 4.99E-07    |
| MIR181A2HG | BNIP1    | 0.470250655 | 0           |
| MIR181A2HG | MAP3K6   | 0.448307316 | 0           |
| MIR181A2HG | MANEAL   | 0.303623371 | 1.02E-10    |
| MIR181A2HG | CD207    | 0.301682828 | 1.09E-10    |
| MIR181A2HG | CD1A     | 0.284064923 | 1.36E-09    |
| MIR181A2HG | C3       | 0.205534201 | 1.48E-05    |
| MIR181A2HG | NT5E     | 0.30626835  | 6.90E-11    |
| MIR181A2HG | CACNG4   | 0.369526554 | 1.19E-15    |
| MIR181A2HG | FHOD1    | 0.604456948 | 0           |
| MIR181A2HG | LEMD1    | 0.310901035 | 3.46E-11    |
| MIR181A2HG | ATP11A   | 0.273329939 | 6.72E-09    |
| MIR181A2HG | PPAP2C   | 0.383991836 | 0           |
| MIR181A2HG | DRAM1    | 0.336312575 | 6.16E-13    |
| MIR181A2HG | CDA      | 0.337317633 | 5.21E-13    |
| MIR181A2HG | CCND2    | 0.376961253 | 1.77E-16    |
| MIR181A2HG | LCN6     | 0.475862812 | 3.44E-26    |
| MIR181A2HG | CDH4     | 0.428546283 | 0           |
| MIR181A2HG | MMP11    | 0.300545506 | 1.60E-10    |
| MIR181A2HG | B3GAT1   | 0.487779455 | 0           |
| MIR181A2HG | SPP1     | 0.155251803 | 0.001114154 |
| MIR181A2HG | HLA-DQB1 | 0.088343825 | 0.064423749 |
| MIR181A2HG | SDC3     | 0.375725993 | 2.55E-16    |
| MIR181A2HG | CX3CL1   | 0.24979235  | 1.26E-07    |
| MIR181A2HG | SDK1     | 0.398288735 | 0           |
| MIR181A2HG | DOCK9    | 0.355758729 | 2.00E-14    |

|            |          |             |             |
|------------|----------|-------------|-------------|
| MIR181A2HG | CSF2     | 0.377068361 | 2.79E-16    |
| MIR181A2HG | GRHL3    | 0.264817583 | 2.00E-08    |
| MIR181A2HG | TMEM92   | 0.353177868 | 2.42E-14    |
| MIR181A2HG | BASP1    | 0.372081772 | 6.63E-16    |
| MIR181A2HG | HRH1     | 0.301577796 | 1.37E-10    |
| MIR181A2HG | ESM1     | 0.174175572 | 0.000250449 |
| MIR181A2HG | B4GALNT3 | 0.448498938 | 0           |
| MIR181A2HG | LMO3     | 0.437663574 | 0           |
| MIR181A2HG | C9orf16  | 0.418069199 | 0           |
| MIR181A2HG | SEMA3F   | 0.459693859 | 0           |
| MIR181A2HG | PLA2G12B | 0.404718148 | 9.87E-19    |
| MIR181A2HG | KLK6     | 0.45148529  | 1.96E-23    |
| MIR181A2HG | ST3GAL5  | 0.508065427 | 0           |
| MIR181A2HG | FAM132B  | 0.486390585 | 0           |
| MIR181A2HG | CDKN1A   | 0.144546788 | 0.002418801 |
| MIR181A2HG | E2F1     | 0.292110168 | 5.31E-10    |
| MIR181A2HG | B3GNT8   | 0.448168599 | 0           |
| MIR181A2HG | MTMR11   | 0.332728918 | 1.12E-12    |
| MIR181A2HG | MYO1G    | 0.175701172 | 0.000220528 |
| MIR181A2HG | TMSB10   | 0.405846952 | 0           |
| MIR181A2HG | UNC5CL   | 0.388113481 | 0           |
| MIR181A2HG | ABR      | 0.217792759 | 4.34E-06    |
| MIR181A2HG | PLP2     | 0.294351904 | 3.87E-10    |
| MIR181A2HG | SRCIN1   | 0.377310172 | 1.58E-16    |
| MIR181A2HG | PDE9A    | 0.433056704 | 0           |
| MIR181A2HG | TREM2    | 0.209266078 | 1.03E-05    |
| MIR181A2HG | KDELR3   | 0.177453286 | 0.000190304 |
| MIR181A2HG | PC       | 0.412904342 | 0           |
| MIR181A2HG | C2CD4A   | 0.323450784 | 4.99E-12    |
| MIR181A2HG | PELI1    | 0.227589024 | 1.55E-06    |
| MIR181A2HG | SSX1     | 0.31020816  | 3.84E-11    |
| MIR181A2HG | MROH6    | 0.461232792 | 0           |
| MIR181A2HG | ESPN     | 0.498493832 | 0           |
| MIR181A2HG | BMP1     | 0.487024881 | 0           |
| MIR181A2HG | TM4SF4   | 0.358300421 | 9.60E-15    |
| MIR181A2HG | CORO2A   | 0.317443414 | 1.27E-11    |
| MIR181A2HG | CD164L2  | 0.435246543 | 1.02E-21    |
| MIR181A2HG | CTSS     | 0.090484147 | 0.05820161  |
| MIR181A2HG | CLU      | 0.461683266 | 0           |
| MIR181A2HG | TMSB4X   | 0.303618549 | 1.02E-10    |
| MIR181A2HG | WNT10A   | 0.454032162 | 1.03E-23    |
| MIR181A2HG | NAPSA    | 0.356725066 | 1.66E-14    |
| MIR181A2HG | PLEKHA4  | 0.585958833 | 0           |
| MIR181A2HG | SFTPA1   | 0.129128687 | 0.006744901 |
| MIR181A2HG | C1orf116 | 0.33708502  | 5.41E-13    |
| MIR181A2HG | TM4SF1   | 0.267654184 | 1.40E-08    |
| MIR181A2HG | SEL1L3   | 0.283812128 | 1.67E-09    |
| MIR181A2HG | VASN     | 0.516770539 | 0           |
| MIR181A2HG | NPTXR    | 0.329646088 | 1.85E-12    |
| MIR181A2HG | PDE4C    | 0.393528539 | 0           |
| MIR181A2HG | CDC42EP1 | 0.461194354 | 0           |

|            |          |             |             |
|------------|----------|-------------|-------------|
| MIR181A2HG | ENDOD1   | 0.391015894 | 0           |
| MIR181A2HG | RYR1     | 0.484344017 | 0           |
| MIR181A2HG | IL1RAP   | 0.332478717 | 1.16E-12    |
| MIR181A2HG | SLC35F2  | 0.439395775 | 3.79E-22    |
| MIR181A2HG | ISYNA1   | 0.547373602 | 0           |
| MIR181A2HG | HLA-G    | 0.222892513 | 2.55E-06    |
| MIR181A2HG | CDKN2B   | 0.228902152 | 1.34E-06    |
| MIR181A2HG | ALDH1A3  | 0.21762993  | 4.42E-06    |
| MIR181A2HG | CLIP3    | 0.35198345  | 4.02E-14    |
| MIR181A2HG | ULBP2    | 0.340327701 | 3.13E-13    |
| MIR181A2HG | ETHE1    | 0.379785798 | 6.40E-17    |
| MIR181A2HG | XPR1     | 0.172287294 | 0.000292742 |
| MIR181A2HG | SPTBN2   | 0.301743462 | 1.34E-10    |
| MIR181A2HG | IVL      | 0.219211149 | 3.55E-06    |
| MIR181A2HG | MARCO    | 0.204485741 | 1.64E-05    |
| MIR181A2HG | PLXND1   | 0.362682934 | 5.20E-15    |
| MIR181A2HG | EMILIN2  | 0.282977133 | 1.87E-09    |
| MIR181A2HG | PLAUR    | 0.201559357 | 2.18E-05    |
| MIR181A2HG | CDC42EP5 | 0.521226494 | 0           |
| MIR181A2HG | TRPC5    | 0.423311932 | 1.63E-20    |
| MIR181A2HG | TMEM100  | 0.294970739 | 3.55E-10    |
| MIR181A2HG | QSOX1    | 0.324486337 | 4.23E-12    |
| MIR181A2HG | ARHGAP23 | 0.439078115 | 0           |
| MIR181A2HG | MDF1     | 0.373259304 | 4.95E-16    |
| MIR181A2HG | FSTL3    | 0.561706102 | 0           |
| MIR181A2HG | INF2     | 0.460415101 | 0           |
| MIR181A2HG | TGFBR1   | 0.40227294  | 0           |
| MIR181A2HG | TGFBI    | 0.141796991 | 0.002928352 |
| MIR181A2HG | ERBB3    | 0.398949412 | 0           |
| MIR181A2HG | CCL18    | 0.195303773 | 3.92E-05    |
| MIR181A2HG | CCL17    | 0.210732327 | 8.47E-06    |
| MIR181A2HG | C16orf45 | 0.465505635 | 0           |
| MIR181A2HG | PRDM1    | 0.406819813 | 0           |
| MIR181A2HG | TRIM47   | 0.387964836 | 0           |
| MIR181A2HG | CNFN     | 0.396892632 | 0           |
| MIR181A2HG | ARMCX3   | 0.470511351 | 0           |
| MIR181A2HG | RAMP1    | 0.470148248 | 0           |
| MIR181A2HG | GABRD    | 0.382240856 | 1.45E-17    |
| MIR181A2HG | COL13A1  | 0.430619658 | 0           |
| MIR181A2HG | S100A5   | 0.381061055 | 3.42E-17    |
| MIR181A2HG | MISP     | 0.280305914 | 2.67E-09    |
| MIR181A2HG | HES6     | 0.570614325 | 0           |
| MIR181A2HG | PSD3     | 0.226599852 | 1.72E-06    |
| MIR181A2HG | DOK7     | 0.53370802  | 0           |
| MIR181A2HG | ZMAT3    | 0.221163802 | 3.06E-06    |
| MIR181A2HG | MFAP2    | 0.420982109 | 0           |
| MIR181A2HG | TMEM79   | 0.392080949 | 0           |
| MIR181A2HG | SLC1A5   | 0.294122411 | 4.00E-10    |
| MIR181A2HG | BBC3     | 0.407915647 | 0           |
| MIR181A2HG | HLA-DQB2 | 0.152756179 | 0.001340758 |
| MIR181A2HG | C1QL1    | 0.544886913 | 0           |

|            |           |             |             |
|------------|-----------|-------------|-------------|
| MIR181A2HG | TMEM215   | 0.478192756 | 1.82E-26    |
| MIR181A2HG | PNP       | 0.294409631 | 3.84E-10    |
| MIR181A2HG | ARNTL     | 0.403538411 | 0           |
| MIR181A2HG | CLDN2     | 0.446339838 | 7.01E-23    |
| MIR181A2HG | MVP       | 0.339565184 | 3.56E-13    |
| MIR181A2HG | LGALS1    | 0.298365185 | 2.18E-10    |
| MIR181A2HG | BIRC7     | 0.512052264 | 1.03E-30    |
| MIR181A2HG | COL8A1    | 0.290909091 | 6.28E-10    |
| MIR181A2HG | PERP      | 0.371412868 | 7.80E-16    |
| MIR181A2HG | GJA4      | 0.459937819 | 0           |
| MIR181A2HG | IGFL2     | 0.274385771 | 5.06E-09    |
| MIR181A2HG | DAPK2     | 0.619793372 | 0           |
| MIR181A2HG | MAMLD1    | 0.344223683 | 1.60E-13    |
| MIR181A2HG | ETV5      | 0.372542317 | 5.92E-16    |
| MIR181A2HG | RUNX1     | 0.220846229 | 3.16E-06    |
| MIR181A2HG | LONRF2    | 0.400618694 | 0           |
| MIR181A2HG | SPOCK1    | 0.266463887 | 1.63E-08    |
| MIR181A2HG | XKRX      | 0.48055881  | 0           |
| MIR181A2HG | TGFB1     | 0.308270098 | 5.13E-11    |
| MIR181A2HG | ERP27     | 0.376567088 | 1.99E-16    |
| MIR181A2HG | TNFRSF10C | 0.212315576 | 7.58E-06    |
| MIR181A2HG | PALM      | 0.594676994 | 0           |
| MIR181A2HG | TSC22D1   | 0.49930287  | 0           |
| MIR181A2HG | TGM2      | 0.164625678 | 0.000542502 |
| MIR181A2HG | UBE2QL1   | 0.50677868  | 0           |
| MIR181A2HG | ECE1      | 0.435724093 | 0           |
| MIR181A2HG | COL8A2    | 0.359128354 | 1.05E-14    |
| MIR181A2HG | HIST3H2A  | 0.336974671 | 5.52E-13    |
| MIR181A2HG | TNFRSF21  | 0.217560146 | 4.45E-06    |
| MIR181A2HG | SOX4      | 0.334533654 | 8.29E-13    |
| MIR181A2HG | ELF3      | 0.334151403 | 8.83E-13    |
| MIR181A2HG | TPD52L1   | 0.542790702 | 0           |
| MIR181A2HG | INHBB     | 0.58990148  | 0           |
| MIR181A2HG | HPN       | 0.572540331 | 0           |
| MIR181A2HG | MMP7      | 0.208873888 | 1.02E-05    |
| MIR181A2HG | RAB27A    | 0.429852036 | 0           |
| MIR181A2HG | IGF2BP2   | 0.45787111  | 0           |
| MIR181A2HG | ITGB4     | 0.282224687 | 2.07E-09    |
| MIR181A2HG | PPP1R1B   | 0.518560098 | 0           |
| MIR181A2HG | NPDC1     | 0.534501599 | 0           |
| MIR181A2HG | CCL13     | 0.232128391 | 8.78E-07    |
| MIR181A2HG | SPINT1    | 0.349457047 | 6.34E-14    |
| MIR181A2HG | HEY2      | 0.471499672 | 0           |
| MIR181A2HG | CST2      | 0.294827609 | 2.97E-10    |
| MIR181A2HG | ADM       | 0.385997697 | 0           |
| MIR181A2HG | VSTM2L    | 0.240667542 | 3.63E-07    |
| MIR181A2HG | FAM84A    | 0.239915096 | 3.95E-07    |
| MIR181A2HG | P4HA2     | 0.274376271 | 5.87E-09    |
| MIR181A2HG | LPL       | 0.374325919 | 3.75E-16    |
| MIR181A2HG | TMEM173   | 0.312277989 | 2.81E-11    |
| MIR181A2HG | DHRS3     | 0.696159476 | 0           |

|            |            |             |             |
|------------|------------|-------------|-------------|
| MIR181A2HG | SCN1B      | 0.483753408 | 0           |
| MIR181A2HG | GLT1D1     | 0.486409875 | 0           |
| MIR181A2HG | PHYHIP     | 0.407046752 | 0           |
| MIR181A2HG | BHLHE40    | 0.280420944 | 2.63E-09    |
| MIR181A2HG | BID        | 0.554377803 | 0           |
| MIR181A2HG | POSTN      | 0.07031051  | 0.141303444 |
| MIR181A2HG | ITGA3      | 0.29306303  | 4.64E-10    |
| MIR181A2HG | RSP04      | 0.43912095  | 0           |
| MIR181A2HG | ADAMTS9    | 0.440718462 | 0           |
| MIR181A2HG | ABTB2      | 0.336472851 | 6.00E-13    |
| MIR181A2HG | KCNQ3      | 0.356473589 | 1.74E-14    |
| MIR181A2HG | ANXA1      | 0.492868713 | 0           |
| MIR181A2HG | S100A11    | 0.371983904 | 6.79E-16    |
| MIR181A2HG | CEACAM6    | 0.23789961  | 4.58E-07    |
| MIR181A2HG | IER5L      | 0.516674089 | 0           |
| MIR181A2HG | KRT80      | 0.281737051 | 2.21E-09    |
| MIR181A2HG | CDH6       | 0.226118599 | 1.81E-06    |
| MIR181A2HG | UNC5B      | 0.218121679 | 4.20E-06    |
| MIR181A2HG | PLEKHN1    | 0.477331873 | 0           |
| MIR181A2HG | SYTL1      | 0.421332588 | 0           |
| MIR181A2HG | TMEM163    | 0.368364788 | 1.57E-15    |
| MIR181A2HG | C4orf48    | 0.350526499 | 5.23E-14    |
| MIR181A2HG | B3GNT7     | 0.344576857 | 1.50E-13    |
| MIR181A2HG | BAIAP3     | 0.605851633 | 0           |
| MIR181A2HG | PHLDA2     | 0.34149658  | 2.56E-13    |
| MIR181A2HG | GAP43      | 0.462898463 | 1.07E-24    |
| MIR181A2HG | S100A1     | 0.386681777 | 0           |
| MIR181A2HG | PTPRE      | 0.346944261 | 9.93E-14    |
| MIR181A2HG | CCND1      | 0.327276415 | 2.71E-12    |
| MIR181A2HG | ST6GALNAC5 | 0.2756591   | 4.27E-09    |
| MIR181A2HG | KRT17      | 0.317064142 | 1.35E-11    |
| MIR181A2HG | HPCAL4     | 0.514139176 | 0           |
| MIR181A2HG | GABBR2     | 0.291140995 | 6.08E-10    |
| MIR181A2HG | DIRAS3     | 0.471498821 | 0           |
| MIR181A2HG | SERINC2    | 0.413846424 | 0           |
| MIR181A2HG | PTCHD4     | 0.306313596 | 6.86E-11    |
| MIR181A2HG | EPS8       | 0.410782601 | 0           |
| MIR181A2HG | LY6E       | 0.420670492 | 0           |
| MIR181A2HG | UPP1       | 0.496102316 | 0           |
| MIR181A2HG | AHNAK2     | 0.291464951 | 5.81E-10    |
| MIR181A2HG | PLXNC1     | 0.435696009 | 0           |
| MIR181A2HG | TNC        | 0.100653018 | 0.035045418 |
| MIR181A2HG | DUSP4      | 0.274952555 | 5.44E-09    |
| MIR181A2HG | NRCAM      | 0.426125123 | 0           |
| MIR181A2HG | NRP2       | 0.312903491 | 2.55E-11    |
| MIR181A2HG | CTSC       | 0.253350193 | 8.22E-08    |
| MIR181A2HG | AMIGO2     | 0.490169694 | 0           |
| MIR181A2HG | NAB2       | 0.585001291 | 0           |
| MIR181A2HG | TBC1D2     | 0.406918106 | 0           |
| MIR181A2HG | PHLDA3     | 0.373496597 | 4.66E-16    |
| MIR181A2HG | PTP4A3     | 0.426694599 | 0           |

|            |         |             |             |
|------------|---------|-------------|-------------|
| MIR181A2HG | CRABP2  | 0.255636749 | 6.23E-08    |
| MIR181A2HG | GOS2    | 0.295189452 | 3.44E-10    |
| MIR181A2HG | S100A6  | 0.393655909 | 0           |
| MIR181A2HG | FOXQ1   | 0.378439621 | 1.08E-16    |
| MIR181A2HG | LRG1    | 0.397153754 | 0           |
| MIR181A2HG | LAMP5   | 0.333500796 | 9.83E-13    |
| MIR181A2HG | ALDH3B1 | 0.410326594 | 0           |
| MIR181A2HG | CDH2    | 0.286749008 | 1.12E-09    |
| MIR181A2HG | SCG5    | 0.370905517 | 8.79E-16    |
| MIR181A2HG | ZCCHC16 | 0.482563612 | 5.48E-27    |
| MIR181A2HG | GRB7    | 0.560018666 | 0           |
| MIR181A2HG | TIAM1   | 0.389419376 | 0           |
| MIR181A2HG | FXD5    | 0.32604768  | 3.30E-12    |
| MIR181A2HG | CLDN9   | 0.486835954 | 0           |
| MIR181A2HG | FAM43A  | 0.502081176 | 0           |
| MIR181A2HG | CHST2   | 0.451892533 | 0           |
| MIR181A2HG | HMGA2   | 0.346622007 | 1.05E-13    |
| MIR181A2HG | GALNT7  | 0.359695703 | 9.40E-15    |
| MIR181A2HG | CBLN1   | 0.321060545 | 7.26E-12    |
| MIR181A2HG | STRA6   | 0.403992715 | 0           |
| MIR181A2HG | MUC21   | 0.29824824  | 1.81E-10    |
| MIR181A2HG | PRR36   | 0.479845937 | 0           |
| MIR181A2HG | NFE2L3  | 0.130420093 | 0.006241517 |
| MIR181A2HG | NR1D1   | 0.380268895 | 5.16E-17    |
| MIR181A2HG | MUC1    | 0.283671993 | 1.70E-09    |
| MIR181A2HG | NAT8L   | 0.453729182 | 0           |
| MIR181A2HG | APOC1   | 0.433561786 | 0           |
| MIR181A2HG | EVA1A   | 0.430834541 | 0           |
| MIR181A2HG | ENTPD1  | 0.499128411 | 0           |
| MIR181A2HG | COL1A1  | 0.183730714 | 0.000110966 |
| MIR181A2HG | FNDC4   | 0.282653744 | 1.95E-09    |
| MIR181A2HG | FRMD3   | 0.43970149  | 0           |
| MIR181A2HG | SHROOM4 | 0.442629292 | 0           |
| MIR181A2HG | NELL2   | 0.514488237 | 0           |
| MIR181A2HG | EPHB3   | 0.356975692 | 1.59E-14    |
| MIR181A2HG | TMC6    | 0.418243234 | 0           |
| MIR181A2HG | NOD1    | 0.611093649 | 0           |
| MIR181A2HG | GGCT    | 0.591555301 | 0           |
| MIR181A2HG | ICAM1   | 0.311647098 | 3.09E-11    |
| MIR181A2HG | PRSS23  | 0.30812131  | 5.24E-11    |
| MIR181A2HG | CFI     | 0.361858293 | 6.13E-15    |
| MIR181A2HG | CD55    | 0.35950635  | 9.75E-15    |
| MIR181A2HG | RASD2   | 0.483574835 | 0           |
| MIR181A2HG | KLK11   | 0.446148604 | 7.35E-23    |
| MIR181A2HG | ICAM5   | 0.622144606 | 0           |
| MIR181A2HG | ADORA1  | 0.307762746 | 5.53E-11    |
| MIR181A2HG | ITGA2   | 0.263051569 | 2.50E-08    |
| MIR181A2HG | ABCC3   | 0.495373982 | 0           |
| MIR181A2HG | MFGE8   | 0.360942877 | 7.36E-15    |
| MIR181A2HG | STK32A  | 0.418228483 | 0           |
| MIR181A2HG | CYSLTR2 | 0.412810304 | 0           |

|            |           |             |             |
|------------|-----------|-------------|-------------|
| MIR181A2HG | LAD1      | 0.427320101 | 0           |
| MIR181A2HG | MGAT3     | 0.409062825 | 0           |
| MIR181A2HG | IGFBP6    | 0.479761827 | 0           |
| MIR181A2HG | CYP2S1    | 0.35850498  | 1.18E-14    |
| MIR181A2HG | KCNJ2     | 0.330219819 | 1.68E-12    |
| MIR181A2HG | FAM20A    | 0.299990922 | 1.73E-10    |
| MIR181A2HG | TGFA      | 0.374491585 | 3.59E-16    |
| MIR181A2HG | MXRA8     | 0.514068967 | 0           |
| MIR181A2HG | C8orf4    | 0.244688341 | 2.29E-07    |
| MIR181A2HG | CLDN10    | 0.395957845 | 6.26E-18    |
| MIR181A2HG | PDE5A     | 0.405607531 | 0           |
| MIR181A2HG | APOE      | 0.4559495   | 0           |
| MIR181A2HG | SPOCK2    | 0.377269607 | 1.60E-16    |
| MIR181A2HG | TENM1     | 0.493043456 | 0           |
| MIR181A2HG | SLIT1     | 0.37882939  | 9.38E-17    |
| MIR181A2HG | CXCL14    | 0.30463155  | 8.79E-11    |
| MIR181A2HG | ECM1      | 0.221586902 | 2.93E-06    |
| MIR181A2HG | DUSP5     | 0.390612084 | 0           |
| MIR181A2HG | SEZ6L2    | 0.274876814 | 5.49E-09    |
| MIR181A2HG | THRSP     | 0.322467002 | 5.82E-12    |
| MIR181A2HG | C19orf33  | 0.392903605 | 0           |
| MIR181A2HG | MPZL2     | 0.384191968 | 0           |
| MIR181A2HG | CTSH      | 0.5114203   | 0           |
| MIR181A2HG | CYP1B1    | 0.309223243 | 4.45E-11    |
| MIR181A2HG | ALOX5     | 0.172952652 | 0.000277131 |
| MIR181A2HG | SYTL5     | 0.432739075 | 1.84E-21    |
| MIR181A2HG | TNFRSF12A | 0.5263071   | 0           |
| MIR181A2HG | DUSP6     | 0.470112505 | 0           |
| MIR181A2HG | ALOX15B   | 0.289508449 | 7.63E-10    |
| MIR181A2HG | SDC4      | 0.521168766 | 0           |
| MIR181A2HG | MDK       | 0.477662779 | 0           |
| MIR181A2HG | KRT19     | 0.344385803 | 1.55E-13    |
| MIR181A2HG | MET       | 0.34443346  | 1.54E-13    |
| MIR181A2HG | TESC      | 0.521230324 | 0           |
| MIR181A2HG | CXCL17    | 0.364567608 | 3.02E-15    |
| MIR181A2HG | NPC2      | 0.552120323 | 0           |
| MIR181A2HG | COMP      | 0.355505834 | 2.09E-14    |
| MIR181A2HG | TUSC3     | 0.387956467 | 0           |
| MIR181A2HG | TMPRSS4   | 0.330488033 | 1.61E-12    |
| MIR181A2HG | LGALS3    | 0.524686044 | 0           |
| MIR181A2HG | CRLF1     | 0.403384801 | 0           |
| MIR181A2HG | CTXN1     | 0.485683953 | 0           |
| MIR181A2HG | PCSK1N    | 0.302986097 | 1.12E-10    |
| MIR181A2HG | NMU       | 0.389890897 | 2.18E-17    |
| MIR181A2HG | GALE      | 0.543387695 | 0           |
| MIR181A2HG | PCSK2     | 0.343905117 | 1.69E-13    |
| MIR181A2HG | GJB3      | 0.503976688 | 0           |
| MIR181A2HG | SLPI      | 0.260077528 | 3.62E-08    |
| MIR181A2HG | AGR2      | 0.398714956 | 0           |
| MIR181A2HG | MRC2      | 0.412391885 | 0           |
| MIR181A2HG | GOLT1A    | 0.55918977  | 0           |

|            |          |              |          |
|------------|----------|--------------|----------|
| MIR181A2HG | SLC27A6  | 0.428041358  | 5.50E-21 |
| MIR181A2HG | KCNN4    | 0.296763135  | 2.75E-10 |
| MIR181A2HG | ETV4     | 0.64536897   | 4.47E-53 |
| MIR181A2HG | SYT12    | 0.442309307  | 0        |
| MIR181A2HG | PVRL4    | 0.36495091   | 3.26E-15 |
| MIR181A2HG | PLCD3    | 0.570565107  | 0        |
| MIR181A2HG | PLAU     | 0.190561448  | 6.05E-05 |
| MIR181A2HG | LRRK2    | 0.340599319  | 2.99E-13 |
| MIR181A2HG | SFN      | 0.28875884   | 8.46E-10 |
| MIR181A2HG | LPAR5    | 0.503157436  | 0        |
| MIR181A2HG | NGEF     | 0.40465779   | 0        |
| MIR181A2HG | DTX4     | 0.522754505  | 0        |
| MIR181A2HG | CST6     | 0.474479812  | 0        |
| MIR181A2HG | QPCT     | 0.448051158  | 0        |
| MIR181A2HG | TIMP1    | 0.521477404  | 0        |
| MIR181A2HG | CAMK2N1  | 0.427026498  | 0        |
| MIR181A2HG | KLHDC8A  | 0.414008686  | 0        |
| MIR181A2HG | PDLIM4   | 0.50390818   | 0        |
| MIR181A2HG | SCEL     | 0.342768008  | 2.06E-13 |
| MIR181A2HG | LCN2     | 0.294387363  | 3.85E-10 |
| MIR181A2HG | PROS1    | 0.390384152  | 0        |
| MIR181A2HG | GABRB2   | 0.433909145  | 0        |
| MIR181A2HG | TMPRSS6  | 0.485430915  | 0        |
| MIR181A2HG | KLK7     | 0.44186127   | 2.09E-22 |
| MIR181A2HG | PDZK1IP1 | 0.279619706  | 2.93E-09 |
| MIR181A2HG | CDH3     | 0.427063092  | 0        |
| MIR181A2HG | LRP4     | 0.417128252  | 0        |
| MIR181A2HG | IGSF1    | 0.352711217  | 3.52E-14 |
| MIR181A2HG | B3GNT3   | 0.337495922  | 5.05E-13 |
| MIR181A2HG | CLDN1    | 0.350716845  | 5.06E-14 |
| MIR181A2HG | GDF15    | 0.392750562  | 0        |
| MIR181A2HG | ARHGAP36 | 0.371967899  | 7.48E-16 |
| MIR181A2HG | LAMB3    | 0.271286207  | 8.77E-09 |
| MIR181A2HG | KLK10    | 0.5014283    | 0        |
| MIR181A2HG | DPP4     | 0.329236037  | 1.97E-12 |
| MIR181A2HG | METTL7B  | 0.515718107  | 0        |
| MIR181A2HG | LIPH     | 0.326706797  | 2.97E-12 |
| MIR181A2HG | CLDN16   | 0.387699175  | 0        |
| MIR181A2HG | CHI3L1   | 0.333341087  | 1.01E-12 |
| MIR181A2HG | SLC22A31 | 0.487836717  | 1.26E-27 |
| MIR181A2HG | TACSTD2  | 0.391627921  | 0        |
| MIR181A2HG | SFTPB    | 0.300886624  | 1.52E-10 |
| MIR181A2HG | RXRG     | 0.539552561  | 0        |
| MIR181A2HG | DCSTAMP  | 0.391118361  | 1.70E-17 |
| MIR181A2HG | CITED1   | 0.46771872   | 0        |
| MIR181A2HG | SERPINA1 | 0.470304269  | 0        |
| MIR181A2HG | PRR15    | 0.512421954  | 0        |
| MIR181A2HG | SLC34A2  | 0.378524156  | 1.05E-16 |
| MIR181A2HG | FN1      | 0.216141066  | 5.15E-06 |
| MIR181A2HG | ZCCHC12  | 0.530325913  | 0        |
| MIR31HG    | TFF3     | -0.402608329 | 1.55E-18 |



|         |           |              |             |
|---------|-----------|--------------|-------------|
| MIR31HG | CCL21     | -0.208859025 | 1.02E-05    |
| MIR31HG | TPO       | -0.494168563 | 2.07E-28    |
| MIR31HG | MT1G      | -0.51097934  | 1.43E-30    |
| MIR31HG | DI01      | -0.43867673  | 4.50E-22    |
| MIR31HG | DPT       | -0.23822389  | 4.42E-07    |
| MIR31HG | CDH16     | -0.454307415 | 9.64E-24    |
| MIR31HG | CRABP1    | -0.391134908 | 1.69E-17    |
| MIR31HG | SLC26A7   | -0.44959414  | 3.14E-23    |
| MIR31HG | MT1H      | -0.524972084 | 1.84E-32    |
| MIR31HG | SLC26A4   | -0.395725784 | 6.57E-18    |
| MIR31HG | SLC5A8    | -0.502606156 | 1.77E-29    |
| MIR31HG | PKHD1L1   | -0.401734112 | 1.86E-18    |
| MIR31HG | TFCP2L1   | -0.488970556 | 9.12E-28    |
| MIR31HG | WSCD2     | -0.383398306 | 8.04E-17    |
| MIR31HG | IPCEF1    | -0.3759935   | 3.44E-16    |
| MIR31HG | SLC5A5    | -0.315978451 | 1.24E-11    |
| MIR31HG | MT1F      | -0.53102927  | 2.62E-33    |
| MIR31HG | FOSB      | -0.158020821 | 0.00089259  |
| MIR31HG | SEMA3D    | -0.366161589 | 2.24E-15    |
| MIR31HG | BMP8A     | -0.297536044 | 2.01E-10    |
| MIR31HG | MATN2     | -0.474155794 | 5.45E-26    |
| MIR31HG | PLA2R1    | -0.347150537 | 7.05E-14    |
| MIR31HG | COL23A1   | -0.472770391 | 7.90E-26    |
| MIR31HG | HGD       | -0.470132915 | 1.60E-25    |
| MIR31HG | TCEAL2    | -0.312057273 | 2.27E-11    |
| MIR31HG | CHRDL1    | -0.13656014  | 0.00414992  |
| MIR31HG | TNFRSF11B | -0.345605213 | 9.23E-14    |
| MIR31HG | FAM167A   | -0.387684777 | 3.41E-17    |
| MIR31HG | KIT       | -0.379121168 | 1.87E-16    |
| MIR31HG | SLC4A4    | -0.476588386 | 2.82E-26    |
| MIR31HG | SMOC2     | -0.226704436 | 1.59E-06    |
| MIR31HG | FHL1      | -0.364547743 | 3.03E-15    |
| MIR31HG | OTOS      | -0.552235606 | 2.07E-36    |
| MIR31HG | IGFBPL1   | -0.453380214 | 1.22E-23    |
| MIR31HG | HBB       | -0.275946108 | 4.11E-09    |
| MIR31HG | BEX1      | -0.268468127 | 1.10E-08    |
| MIR31HG | FABP4     | -0.42367544  | 1.50E-20    |
| MIR31HG | LMOD1     | -0.342715761 | 1.52E-13    |
| MIR31HG | SOD3      | -0.406001164 | 7.50E-19    |
| MIR31HG | TMEM171   | -0.496268899 | 1.13E-28    |
| MIR31HG | PI16      | -0.171629961 | 0.0003031   |
| MIR31HG | ZMAT4     | -0.426898988 | 7.17E-21    |
| MIR31HG | MFAP4     | -0.025641963 | 0.592086337 |
| MIR31HG | CWH43     | -0.47684286  | 2.63E-26    |
| MIR31HG | SPX       | -0.410936487 | 2.57E-19    |
| MIR31HG | APOD      | -0.071618809 | 0.134074333 |
| MIR31HG | DPP6      | -0.398796079 | 3.46E-18    |
| MIR31HG | MMRN1     | -0.281492752 | 1.94E-09    |
| MIR31HG | WDR72     | -0.463167536 | 9.97E-25    |
| MIR31HG | MPPED2    | -0.373706717 | 5.36E-16    |
| MIR31HG | PAPSS2    | -0.381761057 | 1.11E-16    |

|         |            |              |             |
|---------|------------|--------------|-------------|
| MIR31HG | DCN        | -0.110305397 | 0.020798449 |
| MIR31HG | SORBS2     | -0.357789306 | 1.05E-14    |
| MIR31HG | EGR2       | -0.144026166 | 0.00248744  |
| MIR31HG | EDN3       | -0.257589482 | 4.39E-08    |
| MIR31HG | DIO2       | -0.425435163 | 1.00E-20    |
| MIR31HG | ITPR1      | -0.357405422 | 1.13E-14    |
| MIR31HG | CFD        | -0.237906798 | 4.58E-07    |
| MIR31HG | CPXM1      | -0.202368162 | 1.93E-05    |
| MIR31HG | ELM01      | -0.378434744 | 2.14E-16    |
| MIR31HG | GPC3       | -0.261611051 | 2.65E-08    |
| MIR31HG | MYOC       | 0.026467528  | 0.580214052 |
| MIR31HG | DEPTOR     | -0.345731449 | 9.03E-14    |
| MIR31HG | DGKI       | -0.344932475 | 1.04E-13    |
| MIR31HG | CARTPT     | -0.353750511 | 2.19E-14    |
| MIR31HG | IYD        | -0.562115612 | 6.21E-38    |
| MIR31HG | LYVE1      | -0.202922678 | 1.83E-05    |
| MIR31HG | CLCNKB     | -0.379120317 | 1.87E-16    |
| MIR31HG | NCAM1      | -0.529167647 | 4.79E-33    |
| MIR31HG | HBA2       | -0.249888631 | 1.13E-07    |
| MIR31HG | GLT8D2     | -0.30829339  | 4.04E-11    |
| MIR31HG | OGDHL      | -0.586493728 | 6.43E-42    |
| MIR31HG | LIFR       | -0.358751748 | 8.84E-15    |
| MIR31HG | CSGALNACT1 | -0.427795843 | 5.83E-21    |
| MIR31HG | RAP1GAP    | -0.500200435 | 3.59E-29    |
| MIR31HG | COL9A3     | -0.262434978 | 2.39E-08    |
| MIR31HG | FBLN1      | -0.118377537 | 0.013066717 |
| MIR31HG | EFEMP1     | -0.228778249 | 1.27E-06    |
| MIR31HG | AOX1       | -0.368020446 | 1.58E-15    |
| MIR31HG | GRIN2C     | -0.461432361 | 1.56E-24    |
| MIR31HG | C11orf74   | -0.449765125 | 3.01E-23    |
| MIR31HG | PPARGC1A   | -0.541773496 | 7.48E-35    |
| MIR31HG | ANGPTL1    | -0.17540895  | 0.000221256 |
| MIR31HG | SCARA5     | -0.170231815 | 0.000339973 |
| MIR31HG | LTF        | -0.308682593 | 3.81E-11    |
| MIR31HG | CA4        | -0.242837313 | 2.59E-07    |
| MIR31HG | TG         | -0.321621832 | 5.06E-12    |
| MIR31HG | FCGBP      | -0.409472506 | 3.54E-19    |
| MIR31HG | PBX4       | -0.324871552 | 3.00E-12    |
| MIR31HG | CYR61      | -0.206279131 | 1.32E-05    |
| MIR31HG | FOS        | -0.176523513 | 0.000201392 |
| MIR31HG | KHDRBS2    | -0.337148621 | 3.94E-13    |
| MIR31HG | MUM1L1     | -0.436869785 | 6.93E-22    |
| MIR31HG | RGS16      | -0.464165437 | 7.69E-25    |
| MIR31HG | MT1M       | -0.477433102 | 2.24E-26    |
| MIR31HG | LRP2       | -0.400229423 | 2.56E-18    |
| MIR31HG | MAFB       | -0.39798895  | 4.10E-18    |
| MIR31HG | KCNK2      | -0.355282746 | 1.66E-14    |
| MIR31HG | TBC1D4     | -0.265901782 | 1.54E-08    |
| MIR31HG | MIOX       | -0.376833052 | 2.93E-16    |
| MIR31HG | TPPP       | -0.416056695 | 8.33E-20    |
| MIR31HG | FMOD       | -0.451942267 | 1.75E-23    |

|         |          |              |             |
|---------|----------|--------------|-------------|
| MIR31HG | CITED2   | -0.356890125 | 1.24E-14    |
| MIR31HG | RGS8     | -0.388668092 | 2.79E-17    |
| MIR31HG | ABI3BP   | -0.308360195 | 4.00E-11    |
| MIR31HG | ADH1B    | -0.202593448 | 1.89E-05    |
| MIR31HG | OGN      | -0.144153527 | 0.0024653   |
| MIR31HG | NR4A1    | -0.108965312 | 0.022408566 |
| MIR31HG | FOXJ1    | -0.221013533 | 2.93E-06    |
| MIR31HG | ALDH1A1  | -0.324559438 | 3.16E-12    |
| MIR31HG | OCA2     | -0.221711088 | 2.72E-06    |
| MIR31HG | TMEM139  | -0.248687476 | 1.30E-07    |
| MIR31HG | ARHGAP24 | -0.435549983 | 9.48E-22    |
| MIR31HG | SLC25A15 | -0.46805591  | 2.77E-25    |
| MIR31HG | DES      | -0.175845604 | 0.000213265 |
| MIR31HG | GDF10    | -0.243349745 | 2.44E-07    |
| MIR31HG | KIAA1324 | -0.316330567 | 1.17E-11    |
| MIR31HG | JUN      | -0.187459219 | 7.76E-05    |
| MIR31HG | C7       | 0.009938657  | 0.835502726 |
| MIR31HG | LGI3     | -0.459734845 | 2.42E-24    |
| MIR31HG | CDON     | -0.351218805 | 3.44E-14    |
| MIR31HG | BCL2     | -0.458024421 | 3.75E-24    |
| MIR31HG | HLF      | -0.342703846 | 1.53E-13    |
| MIR31HG | EGR1     | -0.175080382 | 0.000227454 |
| MIR31HG | IP6K3    | -0.452621033 | 1.47E-23    |
| MIR31HG | SCUBE3   | -0.314135624 | 1.65E-11    |
| MIR31HG | PKNOX2   | -0.227098887 | 1.53E-06    |
| MIR31HG | SMAD9    | -0.350749037 | 3.74E-14    |
| MIR31HG | IQGAP2   | -0.451103579 | 2.15E-23    |
| MIR31HG | GNA14    | -0.35809135  | 9.97E-15    |
| MIR31HG | LAYN     | -0.217797366 | 4.11E-06    |
| MIR31HG | AVPR1A   | -0.319172929 | 7.47E-12    |
| MIR31HG | PDLIM3   | -0.373874228 | 5.19E-16    |
| MIR31HG | GPM6A    | -0.454078772 | 1.02E-23    |
| MIR31HG | SDPR     | -0.184310275 | 0.000102733 |
| MIR31HG | CRYAB    | -0.425835572 | 9.15E-21    |
| MIR31HG | FOXA2    | -0.237085885 | 5.03E-07    |
| MIR31HG | C8orf88  | -0.337779161 | 3.54E-13    |
| MIR31HG | ISM1     | -0.247037475 | 1.58E-07    |
| MIR31HG | BMP2     | -0.279195261 | 2.65E-09    |
| MIR31HG | ID4      | -0.350576704 | 3.85E-14    |
| MIR31HG | NUPR1    | -0.535708292 | 5.65E-34    |
| MIR31HG | SERTM1   | -0.464958132 | 6.25E-25    |
| MIR31HG | IRS1     | -0.28283383  | 1.61E-09    |
| MIR31HG | FIBIN    | -0.310807538 | 2.75E-11    |
| MIR31HG | PODN     | -0.118483135 | 0.01298518  |
| MIR31HG | TDRD9    | -0.4678645   | 2.91E-25    |
| MIR31HG | EPHA3    | -0.122885644 | 0.009961187 |
| MIR31HG | AIF1L    | -0.315577549 | 1.32E-11    |
| MIR31HG | EBF4     | -0.355282462 | 1.66E-14    |
| MIR31HG | ADM2     | -0.509721095 | 2.10E-30    |
| MIR31HG | GSTM3    | -0.399443782 | 3.02E-18    |
| MIR31HG | HSD17B6  | -0.314032083 | 1.67E-11    |

|         |          |              |             |
|---------|----------|--------------|-------------|
| MIR31HG | AGR3     | -0.135387085 | 0.004487632 |
| MIR31HG | EPHB1    | -0.360653724 | 6.24E-15    |
| MIR31HG | TMOD1    | -0.186482169 | 8.47E-05    |
| MIR31HG | WASF3    | -0.409054935 | 3.88E-19    |
| MIR31HG | SELV     | -0.421544146 | 2.43E-20    |
| MIR31HG | ENPP1    | -0.48305875  | 4.78E-27    |
| MIR31HG | SYNE1    | -0.332567054 | 8.50E-13    |
| MIR31HG | PLCH1    | -0.234877494 | 6.46E-07    |
| MIR31HG | CCDC146  | -0.259798282 | 3.33E-08    |
| MIR31HG | SLC16A2  | -0.30803411  | 4.20E-11    |
| MIR31HG | IER2     | -0.267701067 | 1.22E-08    |
| MIR31HG | KCNAB1   | -0.20684705  | 1.25E-05    |
| MIR31HG | SYNDIG1  | -0.273123036 | 5.98E-09    |
| MIR31HG | C16orf89 | -0.412768466 | 1.72E-19    |
| MIR31HG | CTGF     | -0.05953613  | 0.213143341 |
| MIR31HG | NR4A3    | -0.12606324  | 0.008184929 |
| MIR31HG | KIAA1456 | -0.512212692 | 9.84E-31    |
| MIR31HG | AQP4     | -0.355395862 | 1.63E-14    |
| MIR31HG | RNF150   | -0.346380145 | 8.07E-14    |
| MIR31HG | C1S      | -0.036561713 | 0.444793134 |
| MIR31HG | PFKFB2   | -0.540518584 | 1.14E-34    |
| MIR31HG | PROX1    | -0.346935227 | 7.32E-14    |
| MIR31HG | TCF7L1   | -0.304260369 | 7.43E-11    |
| MIR31HG | HSPB6    | -0.114230549 | 0.016646932 |
| MIR31HG | FHDC1    | -0.384524698 | 6.42E-17    |
| MIR31HG | PRR15L   | -0.484532588 | 3.17E-27    |
| MIR31HG | SLC1A1   | -0.45524312  | 7.61E-24    |
| MIR31HG | BTBD11   | -0.313643163 | 1.78E-11    |
| MIR31HG | TRIM58   | -0.392201394 | 1.36E-17    |
| MIR31HG | LRIG1    | -0.411030313 | 2.52E-19    |
| MIR31HG | ROR2     | -0.248938104 | 1.26E-07    |
| MIR31HG | GPR125   | -0.356034133 | 1.45E-14    |
| MIR31HG | FLRT1    | -0.317528318 | 9.69E-12    |
| MIR31HG | PGF      | -0.350470822 | 3.92E-14    |
| MIR31HG | DUSP1    | -0.169222049 | 0.00036916  |
| MIR31HG | PLA2G7   | -0.274879912 | 4.74E-09    |
| MIR31HG | PLSCR4   | -0.303669756 | 8.11E-11    |
| MIR31HG | FAM46B   | -0.397619179 | 4.43E-18    |
| MIR31HG | GLDC     | -0.301765156 | 1.08E-10    |
| MIR31HG | ZBTB16   | -0.31167275  | 2.41E-11    |
| MIR31HG | OMD      | -0.100364526 | 0.035537046 |
| MIR31HG | HSD11B2  | -0.233475922 | 7.56E-07    |
| MIR31HG | FGL2     | -0.071076917 | 0.137051302 |
| MIR31HG | CLCNKA   | -0.413254559 | 1.55E-19    |
| MIR31HG | GATM     | -0.451411651 | 1.99E-23    |
| MIR31HG | TNS3     | -0.334689789 | 5.97E-13    |
| MIR31HG | TOB1     | -0.21176826  | 7.63E-06    |
| MIR31HG | MARC2    | -0.476248826 | 3.09E-26    |
| MIR31HG | LRRC2    | -0.521449109 | 5.61E-32    |
| MIR31HG | SORD     | -0.328610472 | 1.63E-12    |
| MIR31HG | RIMS4    | -0.264759419 | 1.78E-08    |

|         |          |              |             |
|---------|----------|--------------|-------------|
| MIR31HG | SLC29A4  | -0.331069233 | 1.09E-12    |
| MIR31HG | SLC39A14 | -0.461498174 | 1.54E-24    |
| MIR31HG | FAXDC2   | -0.450779834 | 2.33E-23    |
| MIR31HG | HSPB8    | -0.372563574 | 6.67E-16    |
| MIR31HG | CCL19    | 0.013842509  | 0.772413247 |
| MIR31HG | KCNIP3   | -0.305176926 | 6.47E-11    |
| MIR31HG | CGNL1    | -0.321393331 | 5.25E-12    |
| MIR31HG | ATF3     | -0.019211314 | 0.688117455 |
| MIR31HG | SGCD     | -0.321855226 | 4.88E-12    |
| MIR31HG | STARD13  | -0.311374394 | 2.52E-11    |
| MIR31HG | LDHD     | -0.555622696 | 6.30E-37    |
| MIR31HG | RCAN1    | -0.242732835 | 2.63E-07    |
| MIR31HG | ID3      | -0.37253159  | 6.71E-16    |
| MIR31HG | SYTL3    | -0.402769103 | 1.50E-18    |
| MIR31HG | MT1E     | -0.479321532 | 1.34E-26    |
| MIR31HG | CAMK1D   | -0.31354572  | 1.80E-11    |
| MIR31HG | PRKCQ    | -0.503493487 | 1.36E-29    |
| MIR31HG | NUAK2    | -0.429115433 | 4.29E-21    |
| MIR31HG | LIPG     | -0.263961935 | 1.97E-08    |
| MIR31HG | SLC25A25 | -0.305582866 | 6.09E-11    |
| MIR31HG | PRKX     | -0.233273732 | 7.73E-07    |
| MIR31HG | SRPX     | 0.040940393  | 0.392158417 |
| MIR31HG | FAM189A1 | -0.236484092 | 5.39E-07    |
| MIR31HG | PLEKHH1  | -0.282032091 | 1.80E-09    |
| MIR31HG | WNT11    | -0.269174622 | 1.01E-08    |
| MIR31HG | SNAI1    | -0.227085483 | 1.53E-06    |
| MIR31HG | FDCSP    | 0.018332863  | 0.701680345 |
| MIR31HG | MT1X     | -0.402856475 | 1.47E-18    |
| MIR31HG | ACACB    | -0.423223129 | 1.66E-20    |
| MIR31HG | ARC      | -0.0113025   | 0.813319358 |
| MIR31HG | KLK4     | -0.379959274 | 1.59E-16    |
| MIR31HG | ZFPM2    | -0.095691619 | 0.045086546 |
| MIR31HG | AKAP12   | -0.182766723 | 0.000117658 |
| MIR31HG | GJB6     | -0.313697461 | 1.76E-11    |
| MIR31HG | ERO1LB   | -0.381283985 | 1.22E-16    |
| MIR31HG | DNALI1   | -0.227473765 | 1.47E-06    |
| MIR31HG | HKDC1    | -0.304130658 | 7.57E-11    |
| MIR31HG | ZFP36L2  | -0.296533959 | 2.32E-10    |
| MIR31HG | CAPSL    | -0.245598266 | 1.88E-07    |
| MIR31HG | CYP7B1   | -0.34435945  | 1.15E-13    |
| MIR31HG | CPQ      | -0.180199243 | 0.000147081 |
| MIR31HG | RPS6KA6  | -0.30434371  | 7.33E-11    |
| MIR31HG | TLE1     | -0.410567637 | 2.79E-19    |
| MIR31HG | TP53INP2 | -0.338814933 | 2.97E-13    |
| MIR31HG | KATNAL2  | -0.396507453 | 5.58E-18    |
| MIR31HG | SGPP2    | -0.284649994 | 1.25E-09    |
| MIR31HG | CTH      | -0.509751732 | 2.08E-30    |
| MIR31HG | KIF12    | -0.278963782 | 2.74E-09    |
| MIR31HG | TMEM220  | -0.4605741   | 1.95E-24    |
| MIR31HG | CENPJ    | -0.372699384 | 6.50E-16    |
| MIR31HG | FAM155B  | -0.017366569 | 0.716709498 |

|         |          |              |             |
|---------|----------|--------------|-------------|
| MIR31HG | WFS1     | -0.441478242 | 2.29E-22    |
| MIR31HG | SELENBP1 | -0.273501105 | 5.69E-09    |
| MIR31HG | SNTA1    | -0.624002352 | 9.46E-49    |
| MIR31HG | FRAS1    | -0.283583798 | 1.45E-09    |
| MIR31HG | FBLN7    | -0.496962558 | 9.23E-29    |
| MIR31HG | AGPAT9   | -0.364696035 | 2.95E-15    |
| MIR31HG | GPR83    | -0.226351543 | 1.66E-06    |
| MIR31HG | PRTG     | -0.314800703 | 1.49E-11    |
| MIR31HG | EGR3     | 0.020500266  | 0.668397299 |
| MIR31HG | GRAMD2   | -0.306115822 | 5.62E-11    |
| MIR31HG | HYOU1    | -0.337378753 | 3.79E-13    |
| MIR31HG | FBLN5    | -0.11084743  | 0.020176312 |
| MIR31HG | ITM2A    | -0.209664307 | 9.43E-06    |
| MIR31HG | SRF      | -0.192782256 | 4.78E-05    |
| MIR31HG | FGFR2    | -0.221535435 | 2.77E-06    |
| MIR31HG | MT1A     | -0.235396629 | 6.09E-07    |
| MIR31HG | MAMDC2   | -0.108561428 | 0.022914544 |
| MIR31HG | FHL2     | -0.244813172 | 2.06E-07    |
| MIR31HG | FTCDNL1  | -0.581984771 | 3.72E-41    |
| MIR31HG | PKIA     | -0.092635294 | 0.052432771 |
| MIR31HG | DNAJB4   | -0.195672134 | 3.66E-05    |
| MIR31HG | SLC25A33 | -0.423914377 | 1.42E-20    |
| MIR31HG | EYA2     | -0.415633025 | 9.16E-20    |
| MIR31HG | LPAR1    | -0.32157999  | 5.10E-12    |
| MIR31HG | STX11    | -0.384001245 | 7.13E-17    |
| MIR31HG | ARHGEF28 | -0.472750321 | 7.95E-26    |
| MIR31HG | OR2W3    | -0.374889858 | 4.26E-16    |
| MIR31HG | ALDH1B1  | -0.474051382 | 5.60E-26    |
| MIR31HG | CXCL12   | -0.092267012 | 0.053381811 |
| MIR31HG | OLFM2    | -0.149278    | 0.001710386 |
| MIR31HG | TUB      | -0.31016792  | 3.04E-11    |
| MIR31HG | HTRA3    | -0.191987042 | 5.15E-05    |
| MIR31HG | CKB      | -0.439397409 | 3.79E-22    |
| MIR31HG | RGS2     | -0.082710679 | 0.083450475 |
| MIR31HG | SHANK2   | -0.274436172 | 5.03E-09    |
| MIR31HG | CNTFR    | -0.289424706 | 6.43E-10    |
| MIR31HG | CYTH3    | -0.313363884 | 1.86E-11    |
| MIR31HG | PLAC9    | -0.132614664 | 0.005386459 |
| MIR31HG | WWOX     | -0.346172848 | 8.36E-14    |
| MIR31HG | NPR3     | -0.159361474 | 0.000805457 |
| MIR31HG | SDC2     | -0.106089192 | 0.026232392 |
| MIR31HG | KLF15    | -0.403565523 | 1.26E-18    |
| MIR31HG | TMEM164  | -0.345200478 | 9.91E-14    |
| MIR31HG | LONRF3   | -0.132545518 | 0.005410813 |
| MIR31HG | GBP1     | -0.089027859 | 0.062360373 |
| MIR31HG | ARHGAP6  | -0.398025899 | 4.07E-18    |
| MIR31HG | TMEM119  | -0.037312107 | 0.435497952 |
| MIR31HG | SH3RF1   | -0.342673493 | 1.54E-13    |
| MIR31HG | CRELD2   | -0.34414414  | 1.19E-13    |
| MIR31HG | PCP4     | -0.142887491 | 0.002693589 |
| MIR31HG | GCSH     | -0.379531222 | 1.73E-16    |

|         |          |              |             |
|---------|----------|--------------|-------------|
| MIR31HG | IMPA2    | -0.393657928 | 1.01E-17    |
| MIR31HG | C1R      | -0.021899072 | 0.647251919 |
| MIR31HG | SUCNR1   | -0.138413    | 0.0036631   |
| MIR31HG | SFRP1    | -0.21196038  | 7.49E-06    |
| MIR31HG | UGT8     | -0.447865702 | 4.81E-23    |
| MIR31HG | TLE4     | 0.024601582  | 0.607204064 |
| MIR31HG | ANTXR1   | -0.179550406 | 0.000155541 |
| MIR31HG | GPX3     | -0.406654328 | 6.52E-19    |
| MIR31HG | DPY19L2  | -0.353714798 | 2.20E-14    |
| MIR31HG | FAM46C   | -0.319753259 | 6.82E-12    |
| MIR31HG | IL33     | -0.099514865 | 0.037132935 |
| MIR31HG | PEG3     | -0.309023642 | 3.62E-11    |
| MIR31HG | FAHD2A   | -0.510841615 | 1.49E-30    |
| MIR31HG | PTGDS    | -0.010545652 | 0.825612513 |
| MIR31HG | CHCHD10  | -0.544460403 | 3.01E-35    |
| MIR31HG | CD36     | -0.317870927 | 9.18E-12    |
| MIR31HG | ANKRD37  | -0.237097541 | 5.02E-07    |
| MIR31HG | TSPAN33  | -0.358935995 | 8.55E-15    |
| MIR31HG | PRDM16   | -0.274547302 | 4.95E-09    |
| MIR31HG | UST      | -0.272196196 | 6.76E-09    |
| MIR31HG | NEXN     | -0.348437717 | 5.62E-14    |
| MIR31HG | NUPR1L   | -0.170027784 | 0.000345691 |
| MIR31HG | SLC24A3  | -0.495169939 | 1.55E-28    |
| MIR31HG | MARC1    | -0.17769708  | 0.000182288 |
| MIR31HG | MYH11    | -0.118600435 | 0.012895134 |
| MIR31HG | APOA1    | -0.362549189 | 4.40E-15    |
| MIR31HG | TMEM178B | -0.234689629 | 6.60E-07    |
| MIR31HG | CAPNG    | -0.013601206 | 0.776274309 |
| MIR31HG | PPM1L    | -0.325158065 | 2.87E-12    |
| MIR31HG | FZD8     | -0.371321641 | 8.46E-16    |
| MIR31HG | RCAN2    | -0.286566296 | 9.60E-10    |
| MIR31HG | COPZ2    | -0.576867328 | 2.64E-40    |
| MIR31HG | GAS1     | -0.228124021 | 1.37E-06    |
| MIR31HG | DACT1    | -0.309319446 | 3.46E-11    |
| MIR31HG | WBSCR17  | -0.237956796 | 4.55E-07    |
| MIR31HG | NCS1     | -0.191349125 | 5.46E-05    |
| MIR31HG | SPIRE2   | -0.427123177 | 6.80E-21    |
| MIR31HG | C15orf52 | -0.521241813 | 5.99E-32    |
| MIR31HG | SPAG5    | -0.397263166 | 4.77E-18    |
| MIR31HG | ARL4D    | -0.362872353 | 4.14E-15    |
| MIR31HG | FAM189A2 | -0.235490517 | 6.03E-07    |
| MIR31HG | MAP1LC3A | -0.397558189 | 4.48E-18    |
| MIR31HG | KLF6     | -0.061965743 | 0.195020137 |
| MIR31HG | ADD3     | -0.135991117 | 0.004310757 |
| MIR31HG | TSPAN7   | -0.217111083 | 4.41E-06    |
| MIR31HG | KLF9     | -0.16597474  | 0.000479614 |
| MIR31HG | KCNQ1    | -0.42341993  | 1.59E-20    |
| MIR31HG | MAN1A1   | -0.100173698 | 0.035890299 |
| MIR31HG | MLF1     | -0.228772504 | 1.27E-06    |
| MIR31HG | RARB     | -0.321924798 | 4.82E-12    |
| MIR31HG | CDC42EP2 | -0.425873939 | 9.07E-21    |

|         |          |              |             |
|---------|----------|--------------|-------------|
| MIR31HG | FAM3B    | -0.253939877 | 6.89E-08    |
| MIR31HG | GADD45B  | -0.222249518 | 2.57E-06    |
| MIR31HG | TMEM47   | -0.113585258 | 0.0172751   |
| MIR31HG | SDF2L1   | -0.301170784 | 1.18E-10    |
| MIR31HG | CCDC85A  | -0.186265227 | 8.64E-05    |
| MIR31HG | CRYBG3   | -0.254907425 | 6.12E-08    |
| MIR31HG | FBLN2    | -0.036334489 | 0.447629865 |
| MIR31HG | PEBP4    | -0.365941231 | 2.34E-15    |
| MIR31HG | CDADC1   | -0.305709811 | 5.97E-11    |
| MIR31HG | FAM63A   | -0.427020344 | 6.97E-21    |
| MIR31HG | GLUL     | -0.31334814  | 1.86E-11    |
| MIR31HG | FREM2    | -0.526629669 | 1.08E-32    |
| MIR31HG | ACKR3    | -0.237166546 | 4.98E-07    |
| MIR31HG | DENND6A  | -0.384624765 | 6.30E-17    |
| MIR31HG | CLDN8    | -0.314615888 | 1.53E-11    |
| MIR31HG | UTS2R    | -0.030893943 | 0.518532884 |
| MIR31HG | SCNN1B   | -0.215028831 | 5.47E-06    |
| MIR31HG | TTC30A   | -0.442484299 | 1.80E-22    |
| MIR31HG | CORO2B   | -0.217246751 | 4.35E-06    |
| MIR31HG | TC2N     | -0.394005573 | 9.37E-18    |
| MIR31HG | ALDH2    | -0.444733424 | 1.04E-22    |
| MIR31HG | GPR183   | -0.068659998 | 0.150951012 |
| MIR31HG | C4orf47  | -0.230514062 | 1.05E-06    |
| MIR31HG | SLC25A42 | -0.288953145 | 6.87E-10    |
| MIR31HG | LGMN     | -0.4840736   | 3.60E-27    |
| MIR31HG | ACSF2    | -0.491913694 | 3.95E-28    |
| MIR31HG | KIAA1467 | -0.408876432 | 4.03E-19    |
| MIR31HG | PRKG1    | -0.273335155 | 5.82E-09    |
| MIR31HG | GNAI1    | -0.391143567 | 1.69E-17    |
| MIR31HG | ABCC4    | -0.22555179  | 1.81E-06    |
| MIR31HG | PRPS1    | -0.424922916 | 1.13E-20    |
| MIR31HG | TSPAN5   | -0.359594265 | 7.58E-15    |
| MIR31HG | CR2      | -0.102378442 | 0.031985752 |
| MIR31HG | CCDC170  | -0.383596936 | 7.73E-17    |
| MIR31HG | RRAD     | 0.001581351  | 0.973643849 |
| MIR31HG | SCGB2A1  | -0.491819442 | 4.06E-28    |
| MIR31HG | SESN3    | -0.032834282 | 0.492600737 |
| MIR31HG | SGK223   | -0.169759969 | 0.000353333 |
| MIR31HG | NDRG2    | -0.373315599 | 5.77E-16    |
| MIR31HG | C3orf52  | -0.24232115  | 2.75E-07    |
| MIR31HG | FLRT3    | 0.348799191  | 5.27E-14    |
| MIR31HG | MST1R    | 0.424269113  | 1.31E-20    |
| MIR31HG | SDC1     | 0.112147163  | 0.018750034 |
| MIR31HG | ST8SIA4  | 0.304583476  | 7.07E-11    |
| MIR31HG | UBTD1    | 0.410256303  | 2.99E-19    |
| MIR31HG | EPHA2    | 0.504465999  | 1.02E-29    |
| MIR31HG | TMEM130  | 0.703363386  | 9.02E-67    |
| MIR31HG | SPINK2   | 0.196078429  | 3.52E-05    |
| MIR31HG | MMP16    | 0.364330731  | 3.16E-15    |
| MIR31HG | SIGLEC15 | 0.495952104  | 1.24E-28    |
| MIR31HG | RIN1     | 0.59199385   | 7.28E-43    |



|         |          |             |             |
|---------|----------|-------------|-------------|
| MIR31HG | IL1RN    | 0.147066818 | 0.002005467 |
| MIR31HG | FCER1G   | 0.274307312 | 5.11E-09    |
| MIR31HG | CD276    | 0.49464145  | 1.81E-28    |
| MIR31HG | CTSB     | 0.101329039 | 0.033796472 |
| MIR31HG | FAM171A2 | 0.513659794 | 6.32E-31    |
| MIR31HG | ASPHD1   | 0.254825017 | 6.18E-08    |
| MIR31HG | C15orf48 | 0.026625326 | 0.577957509 |
| MIR31HG | DYSF     | 0.435007382 | 1.08E-21    |
| MIR31HG | PDZRN4   | 0.655153868 | 3.56E-55    |
| MIR31HG | EFHD2    | 0.458118105 | 3.66E-24    |
| MIR31HG | ASF1B    | 0.195802057 | 3.61E-05    |
| MIR31HG | AQP1     | 0.362746189 | 4.24E-15    |
| MIR31HG | ARRDC2   | 0.423789063 | 1.46E-20    |
| MIR31HG | PRSS1    | 0.483732159 | 3.96E-27    |
| MIR31HG | MAPK13   | 0.405535368 | 8.29E-19    |
| MIR31HG | CST5     | 0.302518298 | 9.63E-11    |
| MIR31HG | AHR      | 0.505529783 | 7.41E-30    |
| MIR31HG | BAX      | 0.263040272 | 2.21E-08    |
| MIR31HG | C1orf115 | 0.398255535 | 3.88E-18    |
| MIR31HG | PLK3     | 0.500078029 | 3.72E-29    |
| MIR31HG | JAG2     | 0.416989635 | 6.77E-20    |
| MIR31HG | RAD23B   | 0.508364344 | 3.16E-30    |
| MIR31HG | CA12     | 0.15543781  | 0.001085484 |
| MIR31HG | ADTRP    | 0.457086872 | 4.76E-24    |
| MIR31HG | UCP2     | 0.395139426 | 7.42E-18    |
| MIR31HG | IGFBP2   | 0.334536604 | 6.12E-13    |
| MIR31HG | LOXL2    | 0.291845292 | 4.56E-10    |
| MIR31HG | GPX1     | 0.304913604 | 6.73E-11    |
| MIR31HG | P3H3     | 0.423750767 | 1.47E-20    |
| MIR31HG | C2orf81  | 0.553332226 | 1.41E-36    |
| MIR31HG | CDT1     | 0.190874465 | 5.70E-05    |
| MIR31HG | SNX25    | 0.545816516 | 1.90E-35    |
| MIR31HG | MTHFD1L  | 0.278880168 | 2.77E-09    |
| MIR31HG | CDC42BPG | 0.470791201 | 1.34E-25    |
| MIR31HG | MSN      | 0.416372852 | 7.77E-20    |
| MIR31HG | SIGLEC6  | 0.364777121 | 2.91E-15    |
| MIR31HG | F2R      | 0.227618865 | 1.44E-06    |
| MIR31HG | TMEM184A | 0.396268669 | 5.87E-18    |
| MIR31HG | CKS2     | 0.099818323 | 0.036556114 |
| MIR31HG | TAX1BP3  | 0.373785366 | 5.28E-16    |
| MIR31HG | PMEPA1   | 0.426796169 | 7.34E-21    |
| MIR31HG | CXCL16   | 0.327580728 | 1.93E-12    |
| MIR31HG | FAXC     | 0.476328964 | 3.03E-26    |
| MIR31HG | VTCN1    | 0.250396337 | 1.06E-07    |
| MIR31HG | SH2D4A   | 0.422383449 | 2.01E-20    |
| MIR31HG | RNF24    | 0.532090005 | 1.85E-33    |
| MIR31HG | LY6G6C   | 0.304926477 | 6.72E-11    |
| MIR31HG | NID1     | 0.31895542  | 7.74E-12    |
| MIR31HG | STAC     | 0.361958775 | 4.91E-15    |
| MIR31HG | RAB34    | 0.541998876 | 6.93E-35    |
| MIR31HG | HES4     | 0.310902428 | 2.71E-11    |

|         |          |              |             |
|---------|----------|--------------|-------------|
| MIR31HG | EPHA10   | 0.385913221  | 4.86E-17    |
| MIR31HG | ENTPD2   | 0.625801141  | 4.21E-49    |
| MIR31HG | DDB2     | 0.374178116  | 4.89E-16    |
| MIR31HG | NKAIN4   | 0.454048561  | 1.03E-23    |
| MIR31HG | TRIM29   | 0.466038975  | 4.71E-25    |
| MIR31HG | ADCY8    | 0.460757754  | 1.86E-24    |
| MIR31HG | SFTA2    | 0.040860396  | 0.39308494  |
| MIR31HG | NRIP1    | 0.587552832  | 4.24E-42    |
| MIR31HG | VWA1     | 0.410737701  | 2.69E-19    |
| MIR31HG | APLNR    | 0.262461502  | 2.38E-08    |
| MIR31HG | REN      | 0.461735087  | 1.45E-24    |
| MIR31HG | EDIL3    | 0.31871465   | 8.04E-12    |
| MIR31HG | AGRN     | 0.495286671  | 1.50E-28    |
| MIR31HG | TREM1    | 0.333407928  | 7.39E-13    |
| MIR31HG | SRL      | 0.298175875  | 1.83E-10    |
| MIR31HG | RASGRF1  | 0.636303462  | 3.37E-51    |
| MIR31HG | RMI2     | 0.339412567  | 2.69E-13    |
| MIR31HG | SAMD1    | 0.365328561  | 2.62E-15    |
| MIR31HG | MGAT4B   | 0.485533893  | 2.40E-27    |
| MIR31HG | NXN      | 0.462349982  | 1.23E-24    |
| MIR31HG | SH3BGRL3 | 0.335528122  | 5.18E-13    |
| MIR31HG | CA11     | 0.42449804   | 1.24E-20    |
| MIR31HG | PLD3     | 0.512218649  | 9.82E-31    |
| MIR31HG | LURAP1L  | 0.234011998  | 7.12E-07    |
| MIR31HG | CARNS1   | 0.368992732  | 1.32E-15    |
| MIR31HG | PDLIM7   | 0.527170639  | 9.11E-33    |
| MIR31HG | BCL2L1   | 0.359393068  | 7.86E-15    |
| MIR31HG | GGT6     | 0.304366819  | 7.31E-11    |
| MIR31HG | DPYSL3   | 0.319832688  | 6.73E-12    |
| MIR31HG | FYN      | 0.591654219  | 8.34E-43    |
| MIR31HG | TK1      | 0.114877189  | 0.016037594 |
| MIR31HG | AK1      | 0.309657516  | 3.28E-11    |
| MIR31HG | HIGD1B   | 0.323482321  | 3.76E-12    |
| MIR31HG | TMEM59L  | 0.485740977  | 2.26E-27    |
| MIR31HG | MEGF9    | 0.398937279  | 3.36E-18    |
| MIR31HG | ZFP36L1  | 0.341707009  | 1.81E-13    |
| MIR31HG | ADRA1B   | 0.486656186  | 1.75E-27    |
| MIR31HG | EPHA4    | 0.442112258  | 1.97E-22    |
| MIR31HG | TCERG1L  | 0.37645965   | 3.15E-16    |
| MIR31HG | NGFR     | 0.512218436  | 9.82E-31    |
| MIR31HG | EBI3     | 0.298691527  | 1.69E-10    |
| MIR31HG | S100A10  | 0.311454461  | 2.49E-11    |
| MIR31HG | S100B    | 0.332624486  | 8.42E-13    |
| MIR31HG | CD44     | 0.443822398  | 1.30E-22    |
| MIR31HG | BHLHE41  | 0.453046263  | 1.32E-23    |
| MIR31HG | FBXO2    | 0.54945005   | 5.44E-36    |
| MIR31HG | SLC30A2  | -0.033476028 | 0.484179011 |
| MIR31HG | FRMD5    | 0.241817767  | 2.92E-07    |
| MIR31HG | SAMD11   | 0.387484431  | 3.55E-17    |
| MIR31HG | SIPAIL2  | 0.675160822  | 1.02E-59    |
| MIR31HG | S100A16  | 0.306860614  | 5.02E-11    |

|         |          |             |             |
|---------|----------|-------------|-------------|
| MIR31HG | PPL      | 0.384167125 | 6.90E-17    |
| MIR31HG | ARHGDIB  | 0.334464479 | 6.20E-13    |
| MIR31HG | CDC42EP3 | 0.323745785 | 3.60E-12    |
| MIR31HG | RUNX2    | 0.646294386 | 2.85E-53    |
| MIR31HG | LAMC2    | 0.278226933 | 3.02E-09    |
| MIR31HG | BRINP1   | 0.577642685 | 1.97E-40    |
| MIR31HG | GPRC5B   | 0.384356549 | 6.64E-17    |
| MIR31HG | AQP5     | 0.512781675 | 8.27E-31    |
| MIR31HG | PLAG1    | 0.570140308 | 3.30E-39    |
| MIR31HG | PTPRU    | 0.426141658 | 8.53E-21    |
| MIR31HG | ANGPTL4  | 0.272457603 | 6.53E-09    |
| MIR31HG | PALM3    | 0.41254578  | 1.81E-19    |
| MIR31HG | ACP5     | 0.283507773 | 1.47E-09    |
| MIR31HG | DLG4     | 0.557499141 | 3.24E-37    |
| MIR31HG | ETNK2    | 0.528377822 | 6.18E-33    |
| MIR31HG | CD109    | 0.582630417 | 2.90E-41    |
| MIR31HG | SNX22    | 0.431154212 | 2.67E-21    |
| MIR31HG | TMEM98   | 0.426943255 | 7.09E-21    |
| MIR31HG | CTHRC1   | 0.305576767 | 6.09E-11    |
| MIR31HG | S100A2   | 0.275268193 | 4.50E-09    |
| MIR31HG | C11orf80 | 0.430681537 | 2.98E-21    |
| MIR31HG | SREBF1   | 0.405419699 | 8.50E-19    |
| MIR31HG | PRSS22   | 0.43072345  | 2.95E-21    |
| MIR31HG | CMTM3    | 0.385826771 | 4.95E-17    |
| MIR31HG | RDH5     | 0.5192097   | 1.13E-31    |
| MIR31HG | MYH10    | 0.583542151 | 2.04E-41    |
| MIR31HG | EVPL     | 0.434986744 | 1.08E-21    |
| MIR31HG | SCD      | 0.354099888 | 2.05E-14    |
| MIR31HG | CD151    | 0.568460663 | 6.13E-39    |
| MIR31HG | S100A4   | 0.410735999 | 2.69E-19    |
| MIR31HG | BNIP1    | 0.446483988 | 6.76E-23    |
| MIR31HG | MAP3K6   | 0.407194943 | 5.80E-19    |
| MIR31HG | MANEAL   | 0.20985288  | 9.26E-06    |
| MIR31HG | CD207    | 0.400620258 | 2.36E-18    |
| MIR31HG | CD1A     | 0.386686378 | 4.16E-17    |
| MIR31HG | C3       | 0.43682156  | 7.01E-22    |
| MIR31HG | NT5E     | 0.49804315  | 6.74E-29    |
| MIR31HG | CACNG4   | 0.401533482 | 1.94E-18    |
| MIR31HG | FHOD1    | 0.313374025 | 1.85E-11    |
| MIR31HG | LEMD1    | 0.497241908 | 8.51E-29    |
| MIR31HG | ATP11A   | 0.485996214 | 2.11E-27    |
| MIR31HG | PPAP2C   | 0.429768739 | 3.69E-21    |
| MIR31HG | DRAM1    | 0.480394678 | 9.97E-27    |
| MIR31HG | CDA      | 0.344222789 | 1.17E-13    |
| MIR31HG | CCND2    | 0.50612607  | 6.20E-30    |
| MIR31HG | LCN6     | 0.52416114  | 2.38E-32    |
| MIR31HG | CDH4     | 0.367397906 | 1.78E-15    |
| MIR31HG | MMP11    | 0.359928861 | 7.13E-15    |
| MIR31HG | B3GAT1   | 0.297958579 | 1.89E-10    |
| MIR31HG | SPP1     | 0.15046022  | 0.001569483 |
| MIR31HG | HLA-DQB1 | 0.195774115 | 3.62E-05    |

|         |          |             |             |
|---------|----------|-------------|-------------|
| MIR31HG | SDC3     | 0.649434253 | 6.13E-54    |
| MIR31HG | CX3CL1   | 0.345657835 | 9.15E-14    |
| MIR31HG | SDK1     | 0.634386167 | 8.24E-51    |
| MIR31HG | DOCK9    | 0.477257435 | 2.35E-26    |
| MIR31HG | CSF2     | 0.423304054 | 1.63E-20    |
| MIR31HG | GRHL3    | 0.50931707  | 2.37E-30    |
| MIR31HG | TMEM92   | 0.438167232 | 5.08E-22    |
| MIR31HG | BASP1    | 0.415841527 | 8.74E-20    |
| MIR31HG | HRH1     | 0.453939913 | 1.06E-23    |
| MIR31HG | ESM1     | 0.121475491 | 0.010853593 |
| MIR31HG | B4GALNT3 | 0.346034273 | 8.57E-14    |
| MIR31HG | LMO3     | 0.246917764 | 1.60E-07    |
| MIR31HG | C9orf16  | 0.347825261 | 6.26E-14    |
| MIR31HG | SEMA3F   | 0.664444255 | 3.05E-57    |
| MIR31HG | PLA2G12B | 0.332566342 | 8.50E-13    |
| MIR31HG | KLK6     | 0.470510507 | 1.45E-25    |
| MIR31HG | ST3GAL5  | 0.608553928 | 7.95E-46    |
| MIR31HG | FAM132B  | 0.232779143 | 8.17E-07    |
| MIR31HG | CDKN1A   | 0.158782208 | 0.000842092 |
| MIR31HG | E2F1     | 0.168970216 | 0.000376794 |
| MIR31HG | B3GNT8   | 0.398204757 | 3.92E-18    |
| MIR31HG | MTMR11   | 0.541066008 | 9.49E-35    |
| MIR31HG | MYO1G    | 0.344461644 | 1.13E-13    |
| MIR31HG | TMSB10   | 0.395129426 | 7.43E-18    |
| MIR31HG | UNC5CL   | 0.365945202 | 2.34E-15    |
| MIR31HG | ABR      | 0.46415409  | 7.71E-25    |
| MIR31HG | PLP2     | 0.397832361 | 4.23E-18    |
| MIR31HG | SRCIN1   | 0.34288008  | 1.48E-13    |
| MIR31HG | PDE9A    | 0.330821868 | 1.14E-12    |
| MIR31HG | TREM2    | 0.27001565  | 9.01E-09    |
| MIR31HG | KDEL3    | 0.292150173 | 4.36E-10    |
| MIR31HG | PC       | 0.400765074 | 2.29E-18    |
| MIR31HG | C2CD4A   | 0.205534269 | 1.42E-05    |
| MIR31HG | PELI1    | 0.452932651 | 1.36E-23    |
| MIR31HG | SSX1     | 0.420213824 | 3.29E-20    |
| MIR31HG | MROH6    | 0.481104932 | 8.20E-27    |
| MIR31HG | ESPN     | 0.606517348 | 1.88E-45    |
| MIR31HG | BMP1     | 0.588183018 | 3.31E-42    |
| MIR31HG | TM4SF4   | 0.540879804 | 1.01E-34    |
| MIR31HG | CORO2A   | 0.636781172 | 2.69E-51    |
| MIR31HG | CD164L2  | 0.403571104 | 1.26E-18    |
| MIR31HG | CTSS     | 0.229047457 | 1.23E-06    |
| MIR31HG | CLU      | 0.617376959 | 1.78E-47    |
| MIR31HG | TMSB4X   | 0.430921881 | 2.82E-21    |
| MIR31HG | WNT10A   | 0.53928589  | 1.72E-34    |
| MIR31HG | NAPSA    | 0.42750309  | 6.23E-21    |
| MIR31HG | PLEKHA4  | 0.516650234 | 2.51E-31    |
| MIR31HG | SFTPA1   | 0.258732007 | 3.81E-08    |
| MIR31HG | C1orf116 | 0.400624158 | 2.36E-18    |
| MIR31HG | TM4SF1   | 0.332083729 | 9.21E-13    |
| MIR31HG | SEL1L3   | 0.434048486 | 1.35E-21    |

|         |          |             |          |
|---------|----------|-------------|----------|
| MIR31HG | VASN     | 0.487133542 | 1.53E-27 |
| MIR31HG | NPTXR    | 0.414484705 | 1.18E-19 |
| MIR31HG | PDE4C    | 0.27977786  | 2.45E-09 |
| MIR31HG | CDC42EP1 | 0.481336411 | 7.69E-27 |
| MIR31HG | ENDOD1   | 0.487161697 | 1.52E-27 |
| MIR31HG | RYR1     | 0.559680751 | 1.49E-37 |
| MIR31HG | IL1RAP   | 0.595099818 | 2.09E-43 |
| MIR31HG | SLC35F2  | 0.572416118 | 1.41E-39 |
| MIR31HG | ISYNA1   | 0.630706748 | 4.52E-50 |
| MIR31HG | HLA-G    | 0.228504359 | 1.31E-06 |
| MIR31HG | CDKN2B   | 0.347907243 | 6.17E-14 |
| MIR31HG | ALDH1A3  | 0.336530775 | 4.38E-13 |
| MIR31HG | CLIP3    | 0.622054846 | 2.26E-48 |
| MIR31HG | ULBP2    | 0.405965066 | 7.56E-19 |
| MIR31HG | ETHE1    | 0.298943857 | 1.63E-10 |
| MIR31HG | XPR1     | 0.516770229 | 2.42E-31 |
| MIR31HG | SPTBN2   | 0.420392186 | 3.16E-20 |
| MIR31HG | IVL      | 0.445440187 | 8.74E-23 |
| MIR31HG | MARCO    | 0.20472331  | 1.54E-05 |
| MIR31HG | PLXND1   | 0.564066665 | 3.06E-38 |
| MIR31HG | EMILIN2  | 0.463178458 | 9.94E-25 |
| MIR31HG | PLAUR    | 0.370611174 | 9.69E-16 |
| MIR31HG | CDC42EP5 | 0.463882257 | 8.28E-25 |
| MIR31HG | TRPC5    | 0.632367415 | 2.10E-50 |
| MIR31HG | TMEM100  | 0.556249975 | 5.05E-37 |
| MIR31HG | QSOX1    | 0.524378772 | 2.22E-32 |
| MIR31HG | ARHGAP23 | 0.653251751 | 9.23E-55 |
| MIR31HG | MDF1     | 0.500372768 | 3.41E-29 |
| MIR31HG | FSTL3    | 0.376605247 | 3.06E-16 |
| MIR31HG | INF2     | 0.529505647 | 4.29E-33 |
| MIR31HG | TGFBR1   | 0.501889583 | 2.18E-29 |
| MIR31HG | TGFBI    | 0.365347    | 2.61E-15 |
| MIR31HG | ERBB3    | 0.334678796 | 5.98E-13 |
| MIR31HG | CCL18    | 0.25408668  | 6.76E-08 |
| MIR31HG | CCL17    | 0.270343802 | 8.63E-09 |
| MIR31HG | C16orf45 | 0.589538493 | 1.94E-42 |
| MIR31HG | PRDM1    | 0.455616083 | 6.92E-24 |
| MIR31HG | TRIM47   | 0.31134014  | 2.54E-11 |
| MIR31HG | CNFN     | 0.202261996 | 1.95E-05 |
| MIR31HG | ARMCX3   | 0.508580009 | 2.96E-30 |
| MIR31HG | RAMP1    | 0.516486199 | 2.64E-31 |
| MIR31HG | GABRD    | 0.335349335 | 5.34E-13 |
| MIR31HG | COL13A1  | 0.363734019 | 3.53E-15 |
| MIR31HG | S100A5   | 0.261133119 | 2.82E-08 |
| MIR31HG | MISP     | 0.307759512 | 4.38E-11 |
| MIR31HG | HES6     | 0.28907463  | 6.75E-10 |
| MIR31HG | PSD3     | 0.476728734 | 2.72E-26 |
| MIR31HG | DOK7     | 0.506303935 | 5.88E-30 |
| MIR31HG | ZMAT3    | 0.440418571 | 2.96E-22 |
| MIR31HG | MFAP2    | 0.531020618 | 2.63E-33 |
| MIR31HG | TMEM79   | 0.517685509 | 1.82E-31 |

|         |           |             |          |
|---------|-----------|-------------|----------|
| MIR31HG | SLC1A5    | 0.392952355 | 1.16E-17 |
| MIR31HG | BBC3      | 0.389242016 | 2.48E-17 |
| MIR31HG | HLA-DQB2  | 0.291671399 | 4.67E-10 |
| MIR31HG | C1QL1     | 0.560080734 | 1.29E-37 |
| MIR31HG | TMEM215   | 0.391048689 | 1.72E-17 |
| MIR31HG | PNP       | 0.333389773 | 7.41E-13 |
| MIR31HG | ARNTL     | 0.566112606 | 1.45E-38 |
| MIR31HG | CLDN2     | 0.468674021 | 2.35E-25 |
| MIR31HG | MVP       | 0.459858102 | 2.34E-24 |
| MIR31HG | LGALS1    | 0.441450797 | 2.31E-22 |
| MIR31HG | BIRC7     | 0.421597753 | 2.40E-20 |
| MIR31HG | COL8A1    | 0.514692445 | 4.60E-31 |
| MIR31HG | PERP      | 0.353737989 | 2.19E-14 |
| MIR31HG | GJA4      | 0.465599986 | 5.29E-25 |
| MIR31HG | IGFL2     | 0.514426703 | 4.99E-31 |
| MIR31HG | DAPK2     | 0.282572919 | 1.67E-09 |
| MIR31HG | MAMLD1    | 0.48006065  | 1.09E-26 |
| MIR31HG | ETV5      | 0.527898977 | 7.21E-33 |
| MIR31HG | RUNX1     | 0.435442541 | 9.73E-22 |
| MIR31HG | LONRF2    | 0.451082516 | 2.16E-23 |
| MIR31HG | SPOCK1    | 0.494618544 | 1.82E-28 |
| MIR31HG | XKRX      | 0.488145343 | 1.15E-27 |
| MIR31HG | TGFB1     | 0.471402719 | 1.14E-25 |
| MIR31HG | ERP27     | 0.246504873 | 1.69E-07 |
| MIR31HG | TNFRSF10C | 0.348166452 | 5.90E-14 |
| MIR31HG | PALM      | 0.514437633 | 4.98E-31 |
| MIR31HG | TSC22D1   | 0.754216905 | 7.43E-82 |
| MIR31HG | TGM2      | 0.330537908 | 1.19E-12 |
| MIR31HG | UBE2QL1   | 0.426130027 | 8.55E-21 |
| MIR31HG | ECE1      | 0.627613333 | 1.86E-49 |
| MIR31HG | COL8A2    | 0.552644312 | 1.79E-36 |
| MIR31HG | HIST3H2A  | 0.335464224 | 5.24E-13 |
| MIR31HG | TNFRSF21  | 0.432840949 | 1.80E-21 |
| MIR31HG | SOX4      | 0.487474662 | 1.39E-27 |
| MIR31HG | ELF3      | 0.341301849 | 1.94E-13 |
| MIR31HG | TPD52L1   | 0.414533781 | 1.17E-19 |
| MIR31HG | INHBB     | 0.584614943 | 1.34E-41 |
| MIR31HG | HPN       | 0.397718253 | 4.34E-18 |
| MIR31HG | MMP7      | 0.299918099 | 1.41E-10 |
| MIR31HG | RAB27A    | 0.561824703 | 6.89E-38 |
| MIR31HG | IGF2BP2   | 0.530987854 | 2.65E-33 |
| MIR31HG | ITGB4     | 0.564246728 | 2.87E-38 |
| MIR31HG | PPP1R1B   | 0.559974498 | 1.34E-37 |
| MIR31HG | NPDC1     | 0.486547254 | 1.81E-27 |
| MIR31HG | CCL13     | 0.389243537 | 2.48E-17 |
| MIR31HG | SPINT1    | 0.330697334 | 1.16E-12 |
| MIR31HG | HEY2      | 0.607995087 | 1.01E-45 |
| MIR31HG | CST2      | 0.272836806 | 6.21E-09 |
| MIR31HG | ADM       | 0.314073996 | 1.66E-11 |
| MIR31HG | VSTM2L    | 0.23123701  | 9.70E-07 |
| MIR31HG | FAM84A    | 0.398212274 | 3.91E-18 |

|         |            |             |             |
|---------|------------|-------------|-------------|
| MIR31HG | P4HA2      | 0.3777708   | 2.44E-16    |
| MIR31HG | LPL        | 0.494105658 | 2.11E-28    |
| MIR31HG | TMEM173    | 0.55415517  | 1.06E-36    |
| MIR31HG | DHRS3      | 0.468235335 | 2.64E-25    |
| MIR31HG | SCN1B      | 0.461246837 | 1.64E-24    |
| MIR31HG | GLT1D1     | 0.523041311 | 3.40E-32    |
| MIR31HG | PHYHIP     | 0.541622084 | 7.87E-35    |
| MIR31HG | BHLHE40    | 0.371578509 | 8.05E-16    |
| MIR31HG | BID        | 0.489820024 | 7.17E-28    |
| MIR31HG | POSTN      | 0.179589907 | 0.000155013 |
| MIR31HG | ITGA3      | 0.377128345 | 2.76E-16    |
| MIR31HG | RSPO4      | 0.479152107 | 1.40E-26    |
| MIR31HG | ADAMTS9    | 0.581181046 | 5.08E-41    |
| MIR31HG | ABTB2      | 0.462675075 | 1.13E-24    |
| MIR31HG | KCNQ3      | 0.431961553 | 2.21E-21    |
| MIR31HG | ANXA1      | 0.571366213 | 2.09E-39    |
| MIR31HG | S100A11    | 0.42264287  | 1.90E-20    |
| MIR31HG | CEACAM6    | 0.333945922 | 6.76E-13    |
| MIR31HG | IER5L      | 0.479524644 | 1.27E-26    |
| MIR31HG | KRT80      | 0.299108531 | 1.59E-10    |
| MIR31HG | CDH6       | 0.468615177 | 2.39E-25    |
| MIR31HG | UNC5B      | 0.542181918 | 6.52E-35    |
| MIR31HG | PLEKHN1    | 0.519265655 | 1.11E-31    |
| MIR31HG | SYTL1      | 0.454305217 | 9.64E-24    |
| MIR31HG | TMEM163    | 0.450057028 | 2.80E-23    |
| MIR31HG | C4orf48    | 0.387074519 | 3.85E-17    |
| MIR31HG | B3GNT7     | 0.524261046 | 2.31E-32    |
| MIR31HG | BAIAP3     | 0.602485533 | 1.01E-44    |
| MIR31HG | PHLDA2     | 0.422414086 | 2.00E-20    |
| MIR31HG | GAP43      | 0.502311146 | 1.93E-29    |
| MIR31HG | S100A1     | 0.135509506 | 0.004451264 |
| MIR31HG | PTPRE      | 0.484655136 | 3.07E-27    |
| MIR31HG | CCND1      | 0.479555281 | 1.26E-26    |
| MIR31HG | ST6GALNAC5 | 0.342402258 | 1.61E-13    |
| MIR31HG | KRT17      | 0.419972983 | 3.47E-20    |
| MIR31HG | HPCAL4     | 0.581130126 | 5.18E-41    |
| MIR31HG | GABBR2     | 0.368943869 | 1.33E-15    |
| MIR31HG | DIRAS3     | 0.569502037 | 4.17E-39    |
| MIR31HG | SERINC2    | 0.240953335 | 3.23E-07    |
| MIR31HG | PTCHD4     | 0.540005557 | 1.35E-34    |
| MIR31HG | EPS8       | 0.610637741 | 3.28E-46    |
| MIR31HG | LY6E       | 0.466805963 | 3.85E-25    |
| MIR31HG | UPP1       | 0.33536125  | 5.33E-13    |
| MIR31HG | AHNAK2     | 0.36709877  | 1.88E-15    |
| MIR31HG | PLXNC1     | 0.56777282  | 7.90E-39    |
| MIR31HG | TNC        | 0.400931308 | 2.21E-18    |
| MIR31HG | DUSP4      | 0.54178924  | 7.44E-35    |
| MIR31HG | NRCAM      | 0.557100151 | 3.73E-37    |
| MIR31HG | NRP2       | 0.606061835 | 2.28E-45    |
| MIR31HG | CTSC       | 0.462431964 | 1.21E-24    |
| MIR31HG | AMIGO2     | 0.716631973 | 2.19E-70    |

|         |         |             |             |
|---------|---------|-------------|-------------|
| MIR31HG | NAB2    | 0.49023029  | 6.38E-28    |
| MIR31HG | TBC1D2  | 0.466412434 | 4.27E-25    |
| MIR31HG | PHLDA3  | 0.34959859  | 4.58E-14    |
| MIR31HG | PTP4A3  | 0.326737076 | 2.22E-12    |
| MIR31HG | CRABP2  | 0.326868773 | 2.17E-12    |
| MIR31HG | GOS2    | 0.52468422  | 2.02E-32    |
| MIR31HG | S100A6  | 0.326706014 | 2.23E-12    |
| MIR31HG | FOXQ1   | 0.310900371 | 2.71E-11    |
| MIR31HG | LRG1    | 0.461205846 | 1.66E-24    |
| MIR31HG | LAMP5   | 0.511326701 | 1.29E-30    |
| MIR31HG | ALDH3B1 | 0.381369229 | 1.20E-16    |
| MIR31HG | CDH2    | 0.385978396 | 4.80E-17    |
| MIR31HG | SCG5    | 0.507835856 | 3.71E-30    |
| MIR31HG | ZCCHC16 | 0.579767107 | 8.74E-41    |
| MIR31HG | GRB7    | 0.46167845  | 1.47E-24    |
| MIR31HG | TIAM1   | 0.591435221 | 9.10E-43    |
| MIR31HG | FXYD5   | 0.443718006 | 1.33E-22    |
| MIR31HG | CLDN9   | 0.406760848 | 6.37E-19    |
| MIR31HG | FAM43A  | 0.436670999 | 7.27E-22    |
| MIR31HG | CHST2   | 0.589948901 | 1.64E-42    |
| MIR31HG | HMGA2   | 0.64139743  | 3.02E-52    |
| MIR31HG | GALNT7  | 0.544106872 | 3.40E-35    |
| MIR31HG | CBLN1   | 0.258985479 | 3.69E-08    |
| MIR31HG | STRA6   | 0.520191786 | 8.33E-32    |
| MIR31HG | MUC21   | 0.375665076 | 3.67E-16    |
| MIR31HG | PRR36   | 0.55330322  | 1.42E-36    |
| MIR31HG | NFE2L3  | 0.433856509 | 1.42E-21    |
| MIR31HG | NR1D1   | 0.151550954 | 0.001449013 |
| MIR31HG | MUC1    | 0.187255611 | 7.91E-05    |
| MIR31HG | NAT8L   | 0.641375303 | 3.05E-52    |
| MIR31HG | APOC1   | 0.501272801 | 2.62E-29    |
| MIR31HG | EVA1A   | 0.469722861 | 1.78E-25    |
| MIR31HG | ENTPD1  | 0.448938352 | 3.69E-23    |
| MIR31HG | COL1A1  | 0.342363152 | 1.62E-13    |
| MIR31HG | FNDC4   | 0.398064125 | 4.03E-18    |
| MIR31HG | FRMD3   | 0.372997031 | 6.14E-16    |
| MIR31HG | SHROOM4 | 0.599938903 | 2.90E-44    |
| MIR31HG | NELL2   | 0.690643996 | 1.72E-63    |
| MIR31HG | EPHB3   | 0.413257807 | 1.55E-19    |
| MIR31HG | TMC6    | 0.482078295 | 6.27E-27    |
| MIR31HG | NOD1    | 0.58853655  | 2.88E-42    |
| MIR31HG | GGCT    | 0.440966562 | 2.59E-22    |
| MIR31HG | ICAM1   | 0.4316071   | 2.40E-21    |
| MIR31HG | PRSS23  | 0.547537791 | 1.05E-35    |
| MIR31HG | CFI     | 0.518554125 | 1.39E-31    |
| MIR31HG | CD55    | 0.380525932 | 1.42E-16    |
| MIR31HG | RASD2   | 0.614969259 | 5.08E-47    |
| MIR31HG | KLK11   | 0.494083855 | 2.12E-28    |
| MIR31HG | ICAM5   | 0.580010457 | 7.96E-41    |
| MIR31HG | ADORA1  | 0.344335763 | 1.15E-13    |
| MIR31HG | ITGA2   | 0.396045841 | 6.14E-18    |



|         |           |             |             |
|---------|-----------|-------------|-------------|
| MIR31HG | ABCC3     | 0.484316782 | 3.37E-27    |
| MIR31HG | MFGE8     | 0.529151265 | 4.81E-33    |
| MIR31HG | STK32A    | 0.410176448 | 3.04E-19    |
| MIR31HG | CYSLTR2   | 0.652717802 | 1.20E-54    |
| MIR31HG | LAD1      | 0.421371718 | 2.53E-20    |
| MIR31HG | MGAT3     | 0.428938986 | 4.47E-21    |
| MIR31HG | IGFBP6    | 0.565486179 | 1.83E-38    |
| MIR31HG | CYP2S1    | 0.411095204 | 2.49E-19    |
| MIR31HG | KCNJ2     | 0.597118881 | 9.20E-44    |
| MIR31HG | FAM20A    | 0.56501939  | 2.17E-38    |
| MIR31HG | TGFA      | 0.608913558 | 6.83E-46    |
| MIR31HG | MXRA8     | 0.498120665 | 6.59E-29    |
| MIR31HG | C8orf4    | 0.467192259 | 3.48E-25    |
| MIR31HG | CLDN10    | 0.57498379  | 5.39E-40    |
| MIR31HG | PDE5A     | 0.564966556 | 2.21E-38    |
| MIR31HG | APOE      | 0.563717956 | 3.48E-38    |
| MIR31HG | SPOCK2    | 0.474497552 | 4.97E-26    |
| MIR31HG | TENM1     | 0.451564127 | 1.92E-23    |
| MIR31HG | SLIT1     | 0.474789951 | 4.59E-26    |
| MIR31HG | CXCL14    | 0.482304952 | 5.89E-27    |
| MIR31HG | ECM1      | 0.348710826 | 5.36E-14    |
| MIR31HG | DUSP5     | 0.388048024 | 3.16E-17    |
| MIR31HG | SEZ6L2    | 0.265956602 | 1.52E-08    |
| MIR31HG | THRSP     | 0.194497503 | 4.08E-05    |
| MIR31HG | C19orf33  | 0.370009356 | 1.09E-15    |
| MIR31HG | MPZL2     | 0.55678903  | 4.17E-37    |
| MIR31HG | CTSH      | 0.520300718 | 8.05E-32    |
| MIR31HG | CYP1B1    | 0.516593073 | 2.56E-31    |
| MIR31HG | ALOX5     | 0.299747511 | 1.45E-10    |
| MIR31HG | SYTL5     | 0.631856935 | 2.66E-50    |
| MIR31HG | TNFRSF12A | 0.532828201 | 1.46E-33    |
| MIR31HG | DUSP6     | 0.582720555 | 2.80E-41    |
| MIR31HG | ALOX15B   | 0.302912979 | 9.08E-11    |
| MIR31HG | SDC4      | 0.587624532 | 4.12E-42    |
| MIR31HG | MDK       | 0.596712161 | 1.09E-43    |
| MIR31HG | KRT19     | 0.350365437 | 4.00E-14    |
| MIR31HG | MET       | 0.469651871 | 1.82E-25    |
| MIR31HG | TESC      | 0.516034019 | 3.04E-31    |
| MIR31HG | CXCL17    | 0.26782671  | 1.20E-08    |
| MIR31HG | NPC2      | 0.498013364 | 6.80E-29    |
| MIR31HG | COMP      | 0.456116345 | 6.10E-24    |
| MIR31HG | TUSC3     | 0.680359112 | 5.84E-61    |
| MIR31HG | TMPRSS4   | 0.421312005 | 2.57E-20    |
| MIR31HG | LGALS3    | 0.374125281 | 4.94E-16    |
| MIR31HG | CRLF1     | 0.469662013 | 1.81E-25    |
| MIR31HG | CTXN1     | 0.548665119 | 7.14E-36    |
| MIR31HG | PCSK1N    | 0.485553538 | 2.39E-27    |
| MIR31HG | NMU       | 0.163898468 | 0.000565581 |
| MIR31HG | GALE      | 0.502040073 | 2.09E-29    |
| MIR31HG | PCSK2     | 0.138717881 | 0.003588149 |
| MIR31HG | GJB3      | 0.589832098 | 1.72E-42    |

|         |          |             |          |
|---------|----------|-------------|----------|
| MIR31HG | SLPI     | 0.364198113 | 3.24E-15 |
| MIR31HG | AGR2     | 0.431849289 | 2.27E-21 |
| MIR31HG | MRC2     | 0.58752716  | 4.29E-42 |
| MIR31HG | GOLT1A   | 0.436876735 | 6.92E-22 |
| MIR31HG | SLC27A6  | 0.490288532 | 6.28E-28 |
| MIR31HG | KCNN4    | 0.488829995 | 9.49E-28 |
| MIR31HG | ETV4     | 0.527058039 | 9.44E-33 |
| MIR31HG | SYT12    | 0.557204757 | 3.60E-37 |
| MIR31HG | PVRL4    | 0.417147429 | 6.54E-20 |
| MIR31HG | PLCD3    | 0.52925814  | 4.65E-33 |
| MIR31HG | PLAU     | 0.45942656  | 2.62E-24 |
| MIR31HG | LRRK2    | 0.541602368 | 7.92E-35 |
| MIR31HG | SFN      | 0.362391523 | 4.53E-15 |
| MIR31HG | LPAR5    | 0.465347373 | 5.65E-25 |
| MIR31HG | NGEF     | 0.427459829 | 6.30E-21 |
| MIR31HG | DTX4     | 0.412256218 | 1.93E-19 |
| MIR31HG | CST6     | 0.463649005 | 8.80E-25 |
| MIR31HG | QPCT     | 0.52795472  | 7.08E-33 |
| MIR31HG | TIMP1    | 0.563096351 | 4.35E-38 |
| MIR31HG | CAMK2N1  | 0.615113579 | 4.77E-47 |
| MIR31HG | KLHDC8A  | 0.41662809  | 7.34E-20 |
| MIR31HG | PDLIM4   | 0.457499407 | 4.29E-24 |
| MIR31HG | SCEL     | 0.482923862 | 4.96E-27 |
| MIR31HG | LCN2     | 0.262676032 | 2.32E-08 |
| MIR31HG | PROS1    | 0.376438232 | 3.16E-16 |
| MIR31HG | GABRB2   | 0.486013731 | 2.10E-27 |
| MIR31HG | TMPRSS6  | 0.315700239 | 1.29E-11 |
| MIR31HG | KLK7     | 0.38727067  | 3.70E-17 |
| MIR31HG | PDZK1IP1 | 0.394705189 | 8.11E-18 |
| MIR31HG | CDH3     | 0.704216045 | 5.36E-67 |
| MIR31HG | LRP4     | 0.75396805  | 8.99E-82 |
| MIR31HG | IGSF1    | 0.357414074 | 1.13E-14 |
| MIR31HG | B3GNT3   | 0.345518337 | 9.37E-14 |
| MIR31HG | CLDN1    | 0.525961967 | 1.34E-32 |
| MIR31HG | GDF15    | 0.265690798 | 1.58E-08 |
| MIR31HG | ARHGAP36 | 0.309262608 | 3.49E-11 |
| MIR31HG | LAMB3    | 0.514770172 | 4.49E-31 |
| MIR31HG | KLK10    | 0.393254967 | 1.09E-17 |
| MIR31HG | DPP4     | 0.386670068 | 4.18E-17 |
| MIR31HG | METTL7B  | 0.505585171 | 7.28E-30 |
| MIR31HG | LIPH     | 0.479942144 | 1.13E-26 |
| MIR31HG | CLDN16   | 0.541490458 | 8.23E-35 |
| MIR31HG | CHI3L1   | 0.339127048 | 2.82E-13 |
| MIR31HG | SLC22A31 | 0.56305868  | 4.41E-38 |
| MIR31HG | TACSTD2  | 0.470665374 | 1.39E-25 |
| MIR31HG | SFTPB    | 0.299068745 | 1.60E-10 |
| MIR31HG | RXRG     | 0.580777659 | 5.93E-41 |
| MIR31HG | DCSTAMP  | 0.352832188 | 2.58E-14 |
| MIR31HG | CITED1   | 0.334987649 | 5.68E-13 |
| MIR31HG | SERPINA1 | 0.486539382 | 1.81E-27 |
| MIR31HG | PRR15    | 0.659547867 | 3.83E-56 |

|            |           |              |             |
|------------|-----------|--------------|-------------|
| MIR31HG    | SLC34A2   | 0.27224747   | 6.72E-09    |
| MIR31HG    | FN1       | 0.374965742  | 4.20E-16    |
| MIR31HG    | ZCCHC12   | 0.556507481  | 4.61E-37    |
| AC018816.3 | TFF3      | -0.491738838 | 0           |
| AC018816.3 | CCL21     | -0.294464059 | 3.13E-10    |
| AC018816.3 | TPO       | -0.560950394 | 0           |
| AC018816.3 | MT1G      | -0.511535472 | 0           |
| AC018816.3 | DI01      | -0.610960039 | 0           |
| AC018816.3 | DPT       | -0.278208455 | 3.03E-09    |
| AC018816.3 | CDH16     | -0.556320688 | 0           |
| AC018816.3 | CRABP1    | -0.41224807  | 1.93E-19    |
| AC018816.3 | SLC26A7   | -0.53583118  | 0           |
| AC018816.3 | MT1H      | -0.480193364 | 1.05E-26    |
| AC018816.3 | SLC26A4   | -0.446777744 | 0           |
| AC018816.3 | SLC5A8    | -0.590405838 | 1.37E-42    |
| AC018816.3 | PKHD1L1   | -0.617734045 | 1.52E-47    |
| AC018816.3 | TFCP2L1   | -0.661621993 | 0           |
| AC018816.3 | WSCD2     | -0.541936507 | 7.08E-35    |
| AC018816.3 | IPCEF1    | -0.575410122 | 0           |
| AC018816.3 | SLC5A5    | -0.423139408 | 1.69E-20    |
| AC018816.3 | MT1F      | -0.507870259 | 0           |
| AC018816.3 | FOSB      | -0.358352505 | 1.22E-14    |
| AC018816.3 | SEMA3D    | -0.634918622 | 6.43E-51    |
| AC018816.3 | BMP8A     | -0.494350485 | 0           |
| AC018816.3 | MATN2     | -0.61366771  | 0           |
| AC018816.3 | PLA2R1    | -0.647907193 | 0           |
| AC018816.3 | COL23A1   | -0.43461521  | 0           |
| AC018816.3 | HGD       | -0.540693073 | 0           |
| AC018816.3 | TCEAL2    | -0.456701237 | 0           |
| AC018816.3 | CHRD1     | -0.386495417 | 4.33E-17    |
| AC018816.3 | TNFRSF11B | -0.647860103 | 0           |
| AC018816.3 | FAM167A   | -0.543286139 | 0           |
| AC018816.3 | KIT       | -0.569823157 | 0           |
| AC018816.3 | SLC4A4    | -0.680362791 | 0           |
| AC018816.3 | SMOC2     | -0.336864747 | 5.62E-13    |
| AC018816.3 | FHL1      | -0.582648071 | 0           |
| AC018816.3 | OTOS      | -0.431895199 | 0           |
| AC018816.3 | IGFBPL1   | -0.59760786  | 7.54E-44    |
| AC018816.3 | HBB       | -0.333349881 | 1.01E-12    |
| AC018816.3 | BEX1      | -0.380456971 | 4.71E-17    |
| AC018816.3 | FABP4     | -0.4732832   | 6.89E-26    |
| AC018816.3 | LMOD1     | -0.484732368 | 0           |
| AC018816.3 | SOD3      | -0.475503876 | 0           |
| AC018816.3 | TMEM171   | -0.573756017 | 0           |
| AC018816.3 | PI16      | -0.245195267 | 2.15E-07    |
| AC018816.3 | ZMAT4     | -0.576269604 | 3.31E-40    |
| AC018816.3 | MFAP4     | -0.205760148 | 1.45E-05    |
| AC018816.3 | CWH43     | -0.587501404 | 4.33E-42    |
| AC018816.3 | SPX       | -0.559501811 | 0           |
| AC018816.3 | APOD      | -0.126315185 | 0.008092142 |
| AC018816.3 | DPP6      | -0.570088393 | 0           |

|            |            |              |             |
|------------|------------|--------------|-------------|
| AC018816.3 | MMRN1      | -0.46301384  | 0           |
| AC018816.3 | WDR72      | -0.552358326 | 0           |
| AC018816.3 | MPPED2     | -0.562199128 | 0           |
| AC018816.3 | PAPSS2     | -0.546897313 | 0           |
| AC018816.3 | DCN        | -0.160799479 | 0.000731124 |
| AC018816.3 | SORBS2     | -0.628678759 | 0           |
| AC018816.3 | EGR2       | -0.298233702 | 2.23E-10    |
| AC018816.3 | EDN3       | -0.328467686 | 1.67E-12    |
| AC018816.3 | DIO2       | -0.474760366 | 0           |
| AC018816.3 | ITPR1      | -0.631055949 | 0           |
| AC018816.3 | CFD        | -0.16622631  | 0.000477926 |
| AC018816.3 | CPXM1      | -0.379448509 | 7.37E-17    |
| AC018816.3 | ELMO1      | -0.546659877 | 0           |
| AC018816.3 | GPC3       | -0.4104688   | 2.85E-19    |
| AC018816.3 | MYOC       | -0.139657931 | 0.003365717 |
| AC018816.3 | DEPTOR     | -0.606998244 | 0           |
| AC018816.3 | DGKI       | -0.628415935 | 0           |
| AC018816.3 | CARTPT     | -0.419591904 | 3.78E-20    |
| AC018816.3 | IYD        | -0.48843531  | 0           |
| AC018816.3 | LYVE1      | -0.343814199 | 1.72E-13    |
| AC018816.3 | CLCNKB     | -0.459948031 | 0           |
| AC018816.3 | NCAM1      | -0.619602743 | 0           |
| AC018816.3 | HBA2       | -0.233589018 | 8.04E-07    |
| AC018816.3 | GLT8D2     | -0.430137695 | 0           |
| AC018816.3 | OGDHL      | -0.556729888 | 0           |
| AC018816.3 | LIFR       | -0.578115382 | 0           |
| AC018816.3 | CSGALNACT1 | -0.6317918   | 0           |
| AC018816.3 | RAP1GAP    | -0.528353526 | 0           |
| AC018816.3 | COL9A3     | -0.411034503 | 0           |
| AC018816.3 | FBLN1      | -0.2079738   | 1.17E-05    |
| AC018816.3 | EFEMP1     | -0.502936738 | 0           |
| AC018816.3 | AOX1       | -0.528948197 | 5.14E-33    |
| AC018816.3 | GRIN2C     | -0.54310785  | 0           |
| AC018816.3 | C11orf74   | -0.411525543 | 0           |
| AC018816.3 | PPARGC1A   | -0.64298119  | 0           |
| AC018816.3 | ANGPTL1    | -0.471534564 | 0           |
| AC018816.3 | SCARA5     | -0.301796676 | 1.07E-10    |
| AC018816.3 | LTF        | -0.404722609 | 0           |
| AC018816.3 | CA4        | -0.386218603 | 4.57E-17    |
| AC018816.3 | TG         | -0.437210404 | 0           |
| AC018816.3 | FCGBP      | -0.508301302 | 0           |
| AC018816.3 | PBX4       | -0.390526131 | 0           |
| AC018816.3 | CYR61      | -0.376145831 | 2.26E-16    |
| AC018816.3 | FOS        | -0.390225152 | 0           |
| AC018816.3 | KHDRBS2    | -0.482677999 | 0           |
| AC018816.3 | MUM1L1     | -0.582148804 | 0           |
| AC018816.3 | RGS16      | -0.460753382 | 0           |
| AC018816.3 | MT1M       | -0.46551528  | 0           |
| AC018816.3 | LRP2       | -0.622665574 | 0           |
| AC018816.3 | MAFB       | -0.525017375 | 0           |
| AC018816.3 | KCNK2      | -0.567254062 | 0           |

|            |          |              |             |
|------------|----------|--------------|-------------|
| AC018816.3 | TBC1D4   | -0.535758417 | 0           |
| AC018816.3 | MIOX     | -0.426941765 | 7.09E-21    |
| AC018816.3 | TPPP     | -0.556551741 | 0           |
| AC018816.3 | FMOD     | -0.645549718 | 0           |
| AC018816.3 | CITED2   | -0.625226443 | 0           |
| AC018816.3 | RGS8     | -0.524047352 | 2.47E-32    |
| AC018816.3 | ABI3BP   | -0.411600292 | 0           |
| AC018816.3 | ADH1B    | -0.28431125  | 1.31E-09    |
| AC018816.3 | OGN      | -0.257408459 | 4.49E-08    |
| AC018816.3 | NR4A1    | -0.317786944 | 1.21E-11    |
| AC018816.3 | FOXJ1    | -0.432455851 | 1.97E-21    |
| AC018816.3 | ALDH1A1  | -0.512470321 | 0           |
| AC018816.3 | OCA2     | -0.524833699 | 1.92E-32    |
| AC018816.3 | TMEM139  | -0.402255778 | 0           |
| AC018816.3 | ARHGAP24 | -0.551249443 | 0           |
| AC018816.3 | SLC25A15 | -0.689644613 | 0           |
| AC018816.3 | DES      | -0.265667552 | 1.58E-08    |
| AC018816.3 | GDF10    | -0.419428636 | 3.92E-20    |
| AC018816.3 | KIAA1324 | -0.499179472 | 0           |
| AC018816.3 | JUN      | -0.381787971 | 2.13E-17    |
| AC018816.3 | C7       | -0.07266841  | 0.128415151 |
| AC018816.3 | LGI3     | -0.499232945 | 0           |
| AC018816.3 | CDON     | -0.628999311 | 0           |
| AC018816.3 | BCL2     | -0.680669159 | 0           |
| AC018816.3 | HLF      | -0.500196161 | 0           |
| AC018816.3 | EGR1     | -0.389412709 | 0           |
| AC018816.3 | IP6K3    | -0.528518341 | 0           |
| AC018816.3 | SCUBE3   | -0.505515337 | 0           |
| AC018816.3 | PKNOX2   | -0.466156668 | 0           |
| AC018816.3 | SMAD9    | -0.68940349  | 0           |
| AC018816.3 | IQGAP2   | -0.646512083 | 0           |
| AC018816.3 | GNA14    | -0.604568007 | 0           |
| AC018816.3 | LAYN     | -0.459234023 | 0           |
| AC018816.3 | AVPR1A   | -0.485736007 | 0           |
| AC018816.3 | PDLIM3   | -0.477324356 | 0           |
| AC018816.3 | GPM6A    | -0.520007971 | 0           |
| AC018816.3 | SDPR     | -0.389347464 | 0           |
| AC018816.3 | CRYAB    | -0.386766596 | 0           |
| AC018816.3 | FOXA2    | -0.397075398 | 4.96E-18    |
| AC018816.3 | C8orf88  | -0.547945347 | 0           |
| AC018816.3 | ISM1     | -0.483097553 | 0           |
| AC018816.3 | BMP2     | -0.483725324 | 0           |
| AC018816.3 | ID4      | -0.582343972 | 0           |
| AC018816.3 | NUPR1    | -0.374794123 | 3.31E-16    |
| AC018816.3 | SERTM1   | -0.625014861 | 6.00E-49    |
| AC018816.3 | IRS1     | -0.585583958 | 0           |
| AC018816.3 | FIBIN    | -0.401781474 | 0           |
| AC018816.3 | PODN     | -0.191669338 | 5.47E-05    |
| AC018816.3 | TDRD9    | -0.491172341 | 0           |
| AC018816.3 | EPHA3    | -0.3396961   | 3.48E-13    |
| AC018816.3 | AIF1L    | -0.517421997 | 0           |

|            |          |              |            |
|------------|----------|--------------|------------|
| AC018816.3 | EBF4     | -0.511789219 | 0          |
| AC018816.3 | ADM2     | -0.565920083 | 0          |
| AC018816.3 | GSTM3    | -0.52316328  | 0          |
| AC018816.3 | HSD17B6  | -0.338703098 | 4.12E-13   |
| AC018816.3 | AGR3     | -0.37907393  | 1.89E-16   |
| AC018816.3 | EPHB1    | -0.549975604 | 0          |
| AC018816.3 | TMOD1    | -0.450809323 | 0          |
| AC018816.3 | WASF3    | -0.640133809 | 0          |
| AC018816.3 | SELV     | -0.543486966 | 4.19E-35   |
| AC018816.3 | ENPP1    | -0.356189205 | 1.84E-14   |
| AC018816.3 | SYNE1    | -0.628832178 | 1.07E-49   |
| AC018816.3 | PLCH1    | -0.549119617 | 0          |
| AC018816.3 | CCDC146  | -0.537624143 | 0          |
| AC018816.3 | SLC16A2  | -0.561284704 | 0          |
| AC018816.3 | IER2     | -0.317830062 | 1.20E-11   |
| AC018816.3 | KCNAB1   | -0.366119648 | 2.55E-15   |
| AC018816.3 | SYNDIG1  | -0.47817396  | 0          |
| AC018816.3 | C16orf89 | -0.308339314 | 5.08E-11   |
| AC018816.3 | CTGF     | -0.337508546 | 5.04E-13   |
| AC018816.3 | NR4A3    | -0.276938417 | 4.19E-09   |
| AC018816.3 | KIAA1456 | -0.48552623  | 0          |
| AC018816.3 | AQP4     | -0.40870653  | 0          |
| AC018816.3 | RNF150   | -0.649055081 | 0          |
| AC018816.3 | C1S      | -0.136088189 | 0.00431041 |
| AC018816.3 | PFKFB2   | -0.604644173 | 0          |
| AC018816.3 | PROX1    | -0.540235506 | 0          |
| AC018816.3 | TCF7L1   | -0.545977357 | 0          |
| AC018816.3 | HSPB6    | -0.232725372 | 8.84E-07   |
| AC018816.3 | FHDC1    | -0.396305143 | 0          |
| AC018816.3 | PRR15L   | -0.418419679 | 0          |
| AC018816.3 | SLC1A1   | -0.524715404 | 0          |
| AC018816.3 | BTBD11   | -0.484431389 | 0          |
| AC018816.3 | TRIM58   | -0.652983402 | 0          |
| AC018816.3 | LRIG1    | -0.623081724 | 0          |
| AC018816.3 | ROR2     | -0.518408474 | 0          |
| AC018816.3 | GPR125   | -0.655733482 | 0          |
| AC018816.3 | FLRT1    | -0.542294698 | 0          |
| AC018816.3 | PGF      | -0.429000587 | 0          |
| AC018816.3 | DUSP1    | -0.397559976 | 0          |
| AC018816.3 | PLA2G7   | -0.473994162 | 0          |
| AC018816.3 | PLSCR4   | -0.524377973 | 0          |
| AC018816.3 | FAM46B   | -0.44722524  | 0          |
| AC018816.3 | GLDC     | -0.492972821 | 0          |
| AC018816.3 | ZBTB16   | -0.522799468 | 0          |
| AC018816.3 | OMD      | -0.19221072  | 5.04E-05   |
| AC018816.3 | HSD11B2  | -0.337809099 | 4.79E-13   |
| AC018816.3 | FGL2     | -0.237522588 | 5.18E-07   |
| AC018816.3 | CLCNKA   | -0.471846552 | 1.01E-25   |
| AC018816.3 | GATM     | -0.409438126 | 0          |
| AC018816.3 | TNS3     | -0.646604135 | 0          |
| AC018816.3 | TOB1     | -0.548313982 | 0          |

|            |          |              |             |
|------------|----------|--------------|-------------|
| AC018816.3 | MARC2    | -0.522839324 | 0           |
| AC018816.3 | LRRC2    | -0.602197341 | 0           |
| AC018816.3 | SORD     | -0.414183713 | 0           |
| AC018816.3 | RIMS4    | -0.49137687  | 0           |
| AC018816.3 | SLC29A4  | -0.472153116 | 0           |
| AC018816.3 | SLC39A14 | -0.620973315 | 0           |
| AC018816.3 | FAXDC2   | -0.560676223 | 0           |
| AC018816.3 | HSPB8    | -0.476304689 | 0           |
| AC018816.3 | CCL19    | 0.047496389  | 0.320766985 |
| AC018816.3 | KCNIP3   | -0.439793116 | 0           |
| AC018816.3 | CGNL1    | -0.520323133 | 0           |
| AC018816.3 | ATF3     | -0.204672399 | 1.61E-05    |
| AC018816.3 | SGCD     | -0.561297328 | 0           |
| AC018816.3 | STARD13  | -0.652611647 | 0           |
| AC018816.3 | LDHD     | -0.386284633 | 0           |
| AC018816.3 | RCAN1    | -0.513323613 | 0           |
| AC018816.3 | ID3      | -0.521328049 | 0           |
| AC018816.3 | SYTL3    | -0.464717872 | 0           |
| AC018816.3 | MT1E     | -0.337824842 | 4.78E-13    |
| AC018816.3 | CAMK1D   | -0.458294068 | 0           |
| AC018816.3 | PRKCQ    | -0.540046012 | 0           |
| AC018816.3 | NUAK2    | -0.528469407 | 0           |
| AC018816.3 | LIPG     | -0.408069965 | 0           |
| AC018816.3 | SLC25A25 | -0.557369999 | 0           |
| AC018816.3 | PRKX     | -0.459673718 | 0           |
| AC018816.3 | SRPX     | -0.236423775 | 5.86E-07    |
| AC018816.3 | FAM189A1 | -0.438595869 | 0           |
| AC018816.3 | PLEKHH1  | -0.489769997 | 0           |
| AC018816.3 | WNT11    | -0.411106273 | 0           |
| AC018816.3 | SNAI1    | -0.483636959 | 0           |
| AC018816.3 | FDCSP    | -0.026771056 | 0.575877195 |
| AC018816.3 | MT1X     | -0.240295645 | 3.79E-07    |
| AC018816.3 | ACACB    | -0.633156273 | 0           |
| AC018816.3 | ARC      | -0.143559034 | 0.002591699 |
| AC018816.3 | KLK4     | -0.396513191 | 5.58E-18    |
| AC018816.3 | ZFPM2    | -0.463795647 | 0           |
| AC018816.3 | AKAP12   | -0.514087973 | 0           |
| AC018816.3 | GJB6     | -0.437209615 | 6.39E-22    |
| AC018816.3 | ERO1LB   | -0.595058536 | 0           |
| AC018816.3 | DNALI1   | -0.3963945   | 0           |
| AC018816.3 | HKDC1    | -0.527709302 | 0           |
| AC018816.3 | ZFP36L2  | -0.538240993 | 0           |
| AC018816.3 | CAPSL    | -0.405708668 | 7.99E-19    |
| AC018816.3 | CYP7B1   | -0.628864991 | 0           |
| AC018816.3 | CPQ      | -0.504063634 | 0           |
| AC018816.3 | RPS6KA6  | -0.567608107 | 8.39E-39    |
| AC018816.3 | TLE1     | -0.644053336 | 0           |
| AC018816.3 | TP53INP2 | -0.564875311 | 0           |
| AC018816.3 | KATNAL2  | -0.536427038 | 0           |
| AC018816.3 | SGPP2    | -0.487806829 | 0           |
| AC018816.3 | CTH      | -0.649204294 | 0           |

|            |          |              |             |
|------------|----------|--------------|-------------|
| AC018816.3 | KIF12    | -0.342383204 | 2.20E-13    |
| AC018816.3 | TMEM220  | -0.516888405 | 0           |
| AC018816.3 | CENPJ    | -0.570539719 | 0           |
| AC018816.3 | FAM155B  | -0.239560503 | 4.12E-07    |
| AC018816.3 | WFS1     | -0.623346534 | 0           |
| AC018816.3 | SELENBP1 | -0.312652014 | 2.65E-11    |
| AC018816.3 | SNTA1    | -0.416652672 | 0           |
| AC018816.3 | FRAS1    | -0.600110775 | 0           |
| AC018816.3 | FBLN7    | -0.555336622 | 0           |
| AC018816.3 | AGPAT9   | -0.527904328 | 0           |
| AC018816.3 | GPR83    | -0.414338032 | 0           |
| AC018816.3 | PRTG     | -0.580048338 | 0           |
| AC018816.3 | EGR3     | -0.134428694 | 0.004810588 |
| AC018816.3 | GRAMD2   | -0.603981794 | 0           |
| AC018816.3 | HYOU1    | -0.654496946 | 0           |
| AC018816.3 | FBLN5    | -0.294942372 | 3.56E-10    |
| AC018816.3 | ITM2A    | -0.450987045 | 0           |
| AC018816.3 | SRF      | -0.425780459 | 0           |
| AC018816.3 | FGFR2    | -0.464417603 | 0           |
| AC018816.3 | MT1A     | -0.248984313 | 1.25E-07    |
| AC018816.3 | MAMDC2   | -0.343093383 | 1.95E-13    |
| AC018816.3 | FHL2     | -0.436333283 | 0           |
| AC018816.3 | FTCDNL1  | -0.54882417  | 0           |
| AC018816.3 | PKIA     | -0.318807178 | 1.03E-11    |
| AC018816.3 | DNAJB4   | -0.460657075 | 0           |
| AC018816.3 | SLC25A33 | -0.50400619  | 0           |
| AC018816.3 | EYA2     | -0.456387919 | 0           |
| AC018816.3 | LPAR1    | -0.474061676 | 0           |
| AC018816.3 | STX11    | -0.390146433 | 0           |
| AC018816.3 | ARHGEF28 | -0.593763847 | 0           |
| AC018816.3 | OR2W3    | -0.572909675 | 0           |
| AC018816.3 | ALDH1B1  | -0.559632676 | 1.51E-37    |
| AC018816.3 | CXCL12   | -0.186557102 | 8.65E-05    |
| AC018816.3 | OLFM2    | -0.346426413 | 1.09E-13    |
| AC018816.3 | TUB      | -0.5334347   | 0           |
| AC018816.3 | HTRA3    | -0.270785948 | 9.35E-09    |
| AC018816.3 | CKB      | -0.299632642 | 1.82E-10    |
| AC018816.3 | RGS2     | -0.171571016 | 0.000310464 |
| AC018816.3 | SHANK2   | -0.605137625 | 0           |
| AC018816.3 | CNTFR    | -0.416810473 | 7.05E-20    |
| AC018816.3 | CYTH3    | -0.535115753 | 0           |
| AC018816.3 | PLAC9    | -0.073793462 | 0.122595979 |
| AC018816.3 | WVOX     | -0.494714014 | 0           |
| AC018816.3 | NPR3     | -0.548149876 | 0           |
| AC018816.3 | SDC2     | -0.475539761 | 0           |
| AC018816.3 | KLF15    | -0.425133114 | 0           |
| AC018816.3 | TMEM164  | -0.722536502 | 0           |
| AC018816.3 | LONRF3   | -0.352929362 | 3.38E-14    |
| AC018816.3 | GBP1     | -0.21123733  | 8.45E-06    |
| AC018816.3 | ARHGAP6  | -0.498758074 | 0           |
| AC018816.3 | TMEM119  | -0.133520511 | 0.005105964 |



|            |          |              |             |
|------------|----------|--------------|-------------|
| AC018816.3 | SH3RF1   | -0.647528488 | 0           |
| AC018816.3 | CRELD2   | -0.346341028 | 1.10E-13    |
| AC018816.3 | PCP4     | -0.097808616 | 0.040555536 |
| AC018816.3 | GCSH     | -0.456986897 | 0           |
| AC018816.3 | IMPA2    | -0.545152432 | 0           |
| AC018816.3 | C1R      | -0.092447882 | 0.052939061 |
| AC018816.3 | SUCNR1   | -0.283134856 | 1.83E-09    |
| AC018816.3 | SFRP1    | -0.388299571 | 0           |
| AC018816.3 | UGT8     | -0.585018027 | 0           |
| AC018816.3 | TLE4     | -0.373606379 | 4.53E-16    |
| AC018816.3 | ANTXR1   | -0.525338494 | 0           |
| AC018816.3 | GPX3     | -0.516517643 | 0           |
| AC018816.3 | DPY19L2  | -0.468567048 | 0           |
| AC018816.3 | FAM46C   | -0.458749649 | 0           |
| AC018816.3 | IL33     | -0.24803443  | 1.41E-07    |
| AC018816.3 | PEG3     | -0.628801306 | 0           |
| AC018816.3 | FAHD2A   | -0.444755998 | 0           |
| AC018816.3 | PTGDS    | 0.006340262  | 0.894574076 |
| AC018816.3 | CHCHD10  | -0.248694247 | 1.43E-07    |
| AC018816.3 | CD36     | -0.465186785 | 0           |
| AC018816.3 | ANKRD37  | -0.34238136  | 2.20E-13    |
| AC018816.3 | TSPAN33  | -0.416454951 | 0           |
| AC018816.3 | PRDM16   | -0.53641484  | 0           |
| AC018816.3 | UST      | -0.37303818  | 5.23E-16    |
| AC018816.3 | NEXN     | -0.471943906 | 0           |
| AC018816.3 | NUPR1L   | -0.121011015 | 0.011162663 |
| AC018816.3 | SLC24A3  | -0.639831838 | 0           |
| AC018816.3 | MARC1    | -0.448296394 | 0           |
| AC018816.3 | MYH11    | -0.266023341 | 1.72E-08    |
| AC018816.3 | APOA1    | -0.382407174 | 9.79E-17    |
| AC018816.3 | TMEM178B | -0.552439457 | 0           |
| AC018816.3 | CAPN6    | -0.354900725 | 1.78E-14    |
| AC018816.3 | PPM1L    | -0.615964762 | 0           |
| AC018816.3 | FZD8     | -0.553383525 | 0           |
| AC018816.3 | RCAN2    | -0.491868761 | 0           |
| AC018816.3 | COPZ2    | -0.457948127 | 0           |
| AC018816.3 | GAS1     | -0.31499488  | 1.86E-11    |
| AC018816.3 | DACT1    | -0.521788169 | 0           |
| AC018816.3 | WBSCR17  | -0.424061393 | 0           |
| AC018816.3 | NCS1     | -0.49888743  | 0           |
| AC018816.3 | SPIRE2   | -0.369406014 | 1.24E-15    |
| AC018816.3 | C15orf52 | -0.582142847 | 0           |
| AC018816.3 | SPAG5    | -0.489363208 | 0           |
| AC018816.3 | ARL4D    | -0.396250394 | 0           |
| AC018816.3 | FAM189A2 | -0.337744279 | 4.85E-13    |
| AC018816.3 | MAP1LC3A | -0.324995532 | 3.90E-12    |
| AC018816.3 | KLF6     | -0.23349498  | 8.12E-07    |
| AC018816.3 | ADD3     | -0.439231441 | 0           |
| AC018816.3 | TSPAN7   | -0.312980651 | 2.53E-11    |
| AC018816.3 | KLF9     | -0.383762343 | 0           |
| AC018816.3 | KCNQ1    | -0.42370368  | 0           |

|            |          |              |             |
|------------|----------|--------------|-------------|
| AC018816.3 | MAN1A1   | -0.345465041 | 1.29E-13    |
| AC018816.3 | MLF1     | -0.353000565 | 3.33E-14    |
| AC018816.3 | RARB     | -0.549573496 | 0           |
| AC018816.3 | CDC42EP2 | -0.27011903  | 1.02E-08    |
| AC018816.3 | FAM3B    | -0.263811674 | 2.27E-08    |
| AC018816.3 | GADD45B  | -0.272479767 | 7.51E-09    |
| AC018816.3 | TMEM47   | -0.44939393  | 0           |
| AC018816.3 | SDF2L1   | -0.197963786 | 3.06E-05    |
| AC018816.3 | CCDC85A  | -0.591244678 | 0           |
| AC018816.3 | CRYBG3   | -0.578329839 | 0           |
| AC018816.3 | FBLN2    | -0.126327808 | 0.00808577  |
| AC018816.3 | PEBP4    | -0.069493812 | 0.145991566 |
| AC018816.3 | CDADC1   | -0.473871757 | 0           |
| AC018816.3 | FAM63A   | -0.562583365 | 0           |
| AC018816.3 | GLUL     | -0.485125682 | 0           |
| AC018816.3 | FREM2    | -0.539502776 | 0           |
| AC018816.3 | ACKR3    | -0.448924307 | 0           |
| AC018816.3 | DENND6A  | -0.659743785 | 0           |
| AC018816.3 | CLDN8    | -0.3530234   | 3.32E-14    |
| AC018816.3 | UTS2R    | -0.341152919 | 1.99E-13    |
| AC018816.3 | SCNN1B   | -0.282505241 | 1.99E-09    |
| AC018816.3 | TTC30A   | -0.669569695 | 0           |
| AC018816.3 | CORO2B   | -0.431532522 | 0           |
| AC018816.3 | TC2N     | -0.599885112 | 0           |
| AC018816.3 | ALDH2    | -0.421362232 | 0           |
| AC018816.3 | GPR183   | -0.115378124 | 0.015620012 |
| AC018816.3 | C4orf47  | -0.311846521 | 3.00E-11    |
| AC018816.3 | SLC25A42 | -0.401684032 | 0           |
| AC018816.3 | LGMN     | -0.618038137 | 0           |
| AC018816.3 | ACSF2    | -0.526640417 | 0           |
| AC018816.3 | KIAA1467 | -0.665354153 | 0           |
| AC018816.3 | PRKG1    | -0.469255242 | 0           |
| AC018816.3 | GNAI1    | -0.548492271 | 0           |
| AC018816.3 | ABCC4    | -0.565985045 | 0           |
| AC018816.3 | PRPS1    | -0.621805757 | 0           |
| AC018816.3 | TSPAN5   | -0.558965667 | 0           |
| AC018816.3 | CR2      | -0.175201788 | 0.000225145 |
| AC018816.3 | CCDC170  | -0.601052148 | 0           |
| AC018816.3 | RRAD     | -0.09161161  | 0.055129566 |
| AC018816.3 | SCGB2A1  | -0.335734305 | 6.79E-13    |
| AC018816.3 | SESN3    | -0.462969445 | 0           |
| AC018816.3 | SGK223   | -0.397240133 | 0           |
| AC018816.3 | NDRG2    | -0.479114199 | 0           |
| AC018816.3 | C3orf52  | -0.451810976 | 0           |
| AC018816.3 | FLRT3    | 0.164082441  | 0.000566201 |
| AC018816.3 | MST1R    | 0.462256998  | 0           |
| AC018816.3 | SDC1     | 0.194809187  | 4.10E-05    |
| AC018816.3 | ST8SIA4  | 0.262035022  | 2.84E-08    |
| AC018816.3 | UBTD1    | 0.612306357  | 0           |
| AC018816.3 | EPHA2    | 0.24501017   | 2.20E-07    |
| AC018816.3 | TMEM130  | 0.455992193  | 0           |

|            |          |             |             |
|------------|----------|-------------|-------------|
| AC018816.3 | SPINK2   | 0.495210302 | 0           |
| AC018816.3 | MMP16    | 0.276689919 | 4.33E-09    |
| AC018816.3 | SIGLEC15 | 0.504574531 | 0           |
| AC018816.3 | RIN1     | 0.696758171 | 0           |
| AC018816.3 | IL1RN    | 0.327341093 | 2.68E-12    |
| AC018816.3 | FCER1G   | 0.365083953 | 3.17E-15    |
| AC018816.3 | CD276    | 0.472369701 | 0           |
| AC018816.3 | CTSB     | 0.475301758 | 0           |
| AC018816.3 | FAM171A2 | 0.345931686 | 1.19E-13    |
| AC018816.3 | ASPHD1   | 0.531498765 | 0           |
| AC018816.3 | C15orf48 | 0.374803059 | 3.30E-16    |
| AC018816.3 | DYSF     | 0.300092194 | 1.70E-10    |
| AC018816.3 | PDZRN4   | 0.351023355 | 4.78E-14    |
| AC018816.3 | EFHD2    | 0.467167115 | 0           |
| AC018816.3 | ASF1B    | 0.344978398 | 1.40E-13    |
| AC018816.3 | AQP1     | 0.363243191 | 4.64E-15    |
| AC018816.3 | ARRDC2   | 0.613530695 | 0           |
| AC018816.3 | PRSS1    | 0.579941206 | 8.17E-41    |
| AC018816.3 | MAPK13   | 0.394423815 | 0           |
| AC018816.3 | CST5     | 0.435249599 | 1.02E-21    |
| AC018816.3 | AHR      | 0.263092135 | 2.49E-08    |
| AC018816.3 | BAX      | 0.450979385 | 0           |
| AC018816.3 | C1orf115 | 0.46547741  | 0           |
| AC018816.3 | PLK3     | 0.434891225 | 0           |
| AC018816.3 | JAG2     | 0.422098509 | 0           |
| AC018816.3 | RAD23B   | 0.477145925 | 0           |
| AC018816.3 | CA12     | 0.028392248 | 0.552832204 |
| AC018816.3 | ADTRP    | 0.506440966 | 0           |
| AC018816.3 | UCP2     | 0.540604425 | 0           |
| AC018816.3 | IGFBP2   | 0.355693201 | 2.02E-14    |
| AC018816.3 | LOXL2    | 0.320992321 | 7.34E-12    |
| AC018816.3 | GPX1     | 0.525898184 | 0           |
| AC018816.3 | P3H3     | 0.584933493 | 0           |
| AC018816.3 | C2orf81  | 0.644898686 | 0           |
| AC018816.3 | CDT1     | 0.447025108 | 0           |
| AC018816.3 | SNX25    | 0.348373979 | 7.70E-14    |
| AC018816.3 | MTHFD1L  | 0.283356406 | 1.77E-09    |
| AC018816.3 | CDC42BPG | 0.358330107 | 9.55E-15    |
| AC018816.3 | MSN      | 0.401870974 | 0           |
| AC018816.3 | SIGLEC6  | 0.411411684 | 2.32E-19    |
| AC018816.3 | F2R      | 0.023510923 | 0.623103477 |
| AC018816.3 | TMEM184A | 0.480398959 | 0           |
| AC018816.3 | CKS2     | 0.295761197 | 3.17E-10    |
| AC018816.3 | TAX1BP3  | 0.575684151 | 0           |
| AC018816.3 | PMEP1    | 0.511978571 | 0           |
| AC018816.3 | CXCL16   | 0.382533608 | 1.06E-17    |
| AC018816.3 | FAXC     | 0.409984909 | 0           |
| AC018816.3 | VTCN1    | 0.293743836 | 3.47E-10    |
| AC018816.3 | SH2D4A   | 0.384253667 | 0           |
| AC018816.3 | RNF24    | 0.29515612  | 3.45E-10    |
| AC018816.3 | LY6G6C   | 0.43068846  | 2.98E-21    |

|            |          |             |             |
|------------|----------|-------------|-------------|
| AC018816.3 | NID1     | 0.163087596 | 0.000612111 |
| AC018816.3 | STAC     | 0.40831506  | 0           |
| AC018816.3 | RAB34    | 0.714049252 | 0           |
| AC018816.3 | HES4     | 0.50050338  | 0           |
| AC018816.3 | EPHA10   | 0.530485764 | 0           |
| AC018816.3 | ENTPD2   | 0.658691212 | 0           |
| AC018816.3 | DDB2     | 0.466554095 | 0           |
| AC018816.3 | NKAIN4   | 0.383097411 | 3.86E-18    |
| AC018816.3 | TRIM29   | 0.335243265 | 7.36E-13    |
| AC018816.3 | ADCY8    | 0.505522659 | 7.42E-30    |
| AC018816.3 | SFTA2    | 0.349142027 | 6.71E-14    |
| AC018816.3 | NRIP1    | 0.303210058 | 1.08E-10    |
| AC018816.3 | VWA1     | 0.3946265   | 0           |
| AC018816.3 | APLNR    | 0.278587132 | 3.36E-09    |
| AC018816.3 | REN      | 0.679789542 | 8.01E-61    |
| AC018816.3 | EDIL3    | 0.269020217 | 1.17E-08    |
| AC018816.3 | AGRN     | 0.266325454 | 1.65E-08    |
| AC018816.3 | TREM1    | 0.387634072 | 0           |
| AC018816.3 | SRL      | 0.288044265 | 9.34E-10    |
| AC018816.3 | RASGRF1  | 0.581874633 | 0           |
| AC018816.3 | RMI2     | 0.530211167 | 0           |
| AC018816.3 | SAMD1    | 0.635292766 | 0           |
| AC018816.3 | MGAT4B   | 0.486816948 | 0           |
| AC018816.3 | NXN      | 0.420398023 | 0           |
| AC018816.3 | SH3BGRL3 | 0.640549959 | 0           |
| AC018816.3 | CA11     | 0.640825265 | 0           |
| AC018816.3 | PLD3     | 0.485618708 | 0           |
| AC018816.3 | LURAP1L  | 0.330153865 | 1.70E-12    |
| AC018816.3 | CARNS1   | 0.385795153 | 0           |
| AC018816.3 | PDLIM7   | 0.627344213 | 0           |
| AC018816.3 | BCL2L1   | 0.427508461 | 0           |
| AC018816.3 | GGT6     | 0.440327559 | 0           |
| AC018816.3 | DPYSL3   | 0.241265953 | 3.39E-07    |
| AC018816.3 | FYN      | 0.496575342 | 0           |
| AC018816.3 | TK1      | 0.390189267 | 0           |
| AC018816.3 | AK1      | 0.561739434 | 0           |
| AC018816.3 | HIGD1B   | 0.444656853 | 0           |
| AC018816.3 | TMEM59L  | 0.305661996 | 7.55E-11    |
| AC018816.3 | MEGF9    | 0.234307423 | 7.42E-07    |
| AC018816.3 | ZFP36L1  | 0.214210237 | 6.26E-06    |
| AC018816.3 | ADRA1B   | 0.381262889 | 3.04E-17    |
| AC018816.3 | EPHA4    | 0.238538851 | 4.62E-07    |
| AC018816.3 | TCERG1L  | 0.362911434 | 4.96E-15    |
| AC018816.3 | NGFR     | 0.465863207 | 0           |
| AC018816.3 | EBI3     | 0.505961982 | 0           |
| AC018816.3 | S100A10  | 0.375861873 | 2.45E-16    |
| AC018816.3 | S100B    | 0.448694389 | 0           |
| AC018816.3 | CD44     | 0.402658453 | 0           |
| AC018816.3 | BHLHE41  | 0.421397975 | 0           |
| AC018816.3 | FBXO2    | 0.645665741 | 0           |
| AC018816.3 | SLC30A2  | 0.1658581   | 0.000492114 |

|            |          |             |          |
|------------|----------|-------------|----------|
| AC018816.3 | FRMD5    | 0.408382858 | 0        |
| AC018816.3 | SAMD11   | 0.358925811 | 1.09E-14 |
| AC018816.3 | SIPAIL2  | 0.35647756  | 1.74E-14 |
| AC018816.3 | S100A16  | 0.507458789 | 0        |
| AC018816.3 | PPL      | 0.26611128  | 1.70E-08 |
| AC018816.3 | ARHGDIB  | 0.372931235 | 5.38E-16 |
| AC018816.3 | CDC42EP3 | 0.33732203  | 5.20E-13 |
| AC018816.3 | RUNX2    | 0.566665721 | 0        |
| AC018816.3 | LAMC2    | 0.230493423 | 1.13E-06 |
| AC018816.3 | BRINP1   | 0.574027494 | 0        |
| AC018816.3 | GPRC5B   | 0.406888462 | 0        |
| AC018816.3 | AQP5     | 0.338838127 | 4.03E-13 |
| AC018816.3 | PLAG1    | 0.446438895 | 0        |
| AC018816.3 | PTPRU    | 0.300156446 | 1.69E-10 |
| AC018816.3 | ANGPTL4  | 0.387864131 | 0        |
| AC018816.3 | PALM3    | 0.533717948 | 0        |
| AC018816.3 | ACP5     | 0.395681343 | 0        |
| AC018816.3 | DLG4     | 0.499257199 | 0        |
| AC018816.3 | ETNK2    | 0.655670081 | 0        |
| AC018816.3 | CD109    | 0.397925774 | 0        |
| AC018816.3 | SNX22    | 0.540084875 | 0        |
| AC018816.3 | TMEM98   | 0.481123605 | 0        |
| AC018816.3 | CTHRC1   | 0.333685893 | 9.53E-13 |
| AC018816.3 | S100A2   | 0.412654    | 0        |
| AC018816.3 | C11orf80 | 0.63962121  | 0        |
| AC018816.3 | SREBF1   | 0.430336835 | 0        |
| AC018816.3 | PRSS22   | 0.496132385 | 0        |
| AC018816.3 | CMTM3    | 0.52093204  | 0        |
| AC018816.3 | RDH5     | 0.615524783 | 0        |
| AC018816.3 | MYH10    | 0.271523217 | 8.50E-09 |
| AC018816.3 | EVPL     | 0.407035122 | 0        |
| AC018816.3 | SCD      | 0.270910765 | 9.20E-09 |
| AC018816.3 | CD151    | 0.64125333  | 0        |
| AC018816.3 | S100A4   | 0.509907607 | 0        |
| AC018816.3 | BNIP1    | 0.59105107  | 0        |
| AC018816.3 | MAP3K6   | 0.571919227 | 0        |
| AC018816.3 | MANEAL   | 0.45687981  | 0        |
| AC018816.3 | CD207    | 0.479966129 | 1.12E-26 |
| AC018816.3 | CD1A     | 0.482909845 | 4.98E-27 |
| AC018816.3 | C3       | 0.323537163 | 4.92E-12 |
| AC018816.3 | NT5E     | 0.298040095 | 2.29E-10 |
| AC018816.3 | CACNG4   | 0.366001757 | 2.31E-15 |
| AC018816.3 | FHOD1    | 0.561029113 | 0        |
| AC018816.3 | LEMD1    | 0.515853987 | 0        |
| AC018816.3 | ATP11A   | 0.249224576 | 1.34E-07 |
| AC018816.3 | PPAP2C   | 0.412894555 | 0        |
| AC018816.3 | DRAM1    | 0.391776567 | 0        |
| AC018816.3 | CDA      | 0.416469277 | 0        |
| AC018816.3 | CCND2    | 0.447039292 | 0        |
| AC018816.3 | LCN6     | 0.502390895 | 1.88E-29 |
| AC018816.3 | CDH4     | 0.470907219 | 0        |

|            |          |             |             |
|------------|----------|-------------|-------------|
| AC018816.3 | MMP11    | 0.531165873 | 0           |
| AC018816.3 | B3GAT1   | 0.288686929 | 8.55E-10    |
| AC018816.3 | SPP1     | 0.257213836 | 5.14E-08    |
| AC018816.3 | HLA-DQB1 | 0.351986996 | 4.01E-14    |
| AC018816.3 | SDC3     | 0.516388146 | 0           |
| AC018816.3 | CX3CL1   | 0.281487134 | 2.28E-09    |
| AC018816.3 | SDK1     | 0.426975578 | 0           |
| AC018816.3 | DOCK9    | 0.322010002 | 6.26E-12    |
| AC018816.3 | CSF2     | 0.603542477 | 6.53E-45    |
| AC018816.3 | GRHL3    | 0.461204282 | 0           |
| AC018816.3 | TMEM92   | 0.577165178 | 2.36E-40    |
| AC018816.3 | BASP1    | 0.539364059 | 0           |
| AC018816.3 | HRH1     | 0.38444458  | 0           |
| AC018816.3 | ESM1     | 0.067273919 | 0.1593342   |
| AC018816.3 | B4GALNT3 | 0.362917108 | 4.96E-15    |
| AC018816.3 | LMO3     | 0.361613341 | 6.44E-15    |
| AC018816.3 | C9orf16  | 0.59757572  | 0           |
| AC018816.3 | SEMA3F   | 0.42283748  | 0           |
| AC018816.3 | PLA2G12B | 0.539964854 | 1.37E-34    |
| AC018816.3 | KLK6     | 0.484196765 | 3.48E-27    |
| AC018816.3 | ST3GAL5  | 0.541084118 | 0           |
| AC018816.3 | FAM132B  | 0.313370135 | 2.38E-11    |
| AC018816.3 | CDKN1A   | 0.096593639 | 0.043123349 |
| AC018816.3 | E2F1     | 0.424860078 | 0           |
| AC018816.3 | B3GNT8   | 0.555159893 | 0           |
| AC018816.3 | MTMR11   | 0.51992528  | 0           |
| AC018816.3 | MYO1G    | 0.38041754  | 4.80E-17    |
| AC018816.3 | TMSB10   | 0.653401822 | 0           |
| AC018816.3 | UNC5CL   | 0.517944666 | 0           |
| AC018816.3 | ABR      | 0.327171739 | 2.75E-12    |
| AC018816.3 | PLP2     | 0.625202047 | 0           |
| AC018816.3 | SRCIN1   | 0.483890422 | 0           |
| AC018816.3 | PDE9A    | 0.560116533 | 0           |
| AC018816.3 | TREM2    | 0.412558827 | 0           |
| AC018816.3 | KDEL3    | 0.365766616 | 2.75E-15    |
| AC018816.3 | PC       | 0.549681008 | 0           |
| AC018816.3 | C2CD4A   | 0.437916044 | 0           |
| AC018816.3 | PELI1    | 0.341777843 | 2.44E-13    |
| AC018816.3 | SSX1     | 0.320894737 | 7.45E-12    |
| AC018816.3 | MROH6    | 0.595056976 | 0           |
| AC018816.3 | ESPN     | 0.683753266 | 0           |
| AC018816.3 | BMP1     | 0.566974217 | 0           |
| AC018816.3 | TM4SF4   | 0.401283627 | 2.05E-18    |
| AC018816.3 | CORO2A   | 0.441913865 | 0           |
| AC018816.3 | CD164L2  | 0.649713299 | 5.34E-54    |
| AC018816.3 | CTSS     | 0.32829126  | 2.30E-12    |
| AC018816.3 | CLU      | 0.547637844 | 0           |
| AC018816.3 | TMSB4X   | 0.566310703 | 0           |
| AC018816.3 | WNT10A   | 0.516270794 | 2.83E-31    |
| AC018816.3 | NAPSA    | 0.428490683 | 0           |
| AC018816.3 | PLEKHA4  | 0.590404576 | 0           |

|            |          |             |          |
|------------|----------|-------------|----------|
| AC018816.3 | SFTPA1   | 0.230035402 | 1.11E-06 |
| AC018816.3 | C1orf116 | 0.437497624 | 0        |
| AC018816.3 | TM4SF1   | 0.358060604 | 1.29E-14 |
| AC018816.3 | SEL1L3   | 0.30572483  | 7.48E-11 |
| AC018816.3 | VASN     | 0.639665179 | 0        |
| AC018816.3 | NPTXR    | 0.479953591 | 0        |
| AC018816.3 | PDE4C    | 0.430307049 | 0        |
| AC018816.3 | CDC42EP1 | 0.586127052 | 0        |
| AC018816.3 | ENDOD1   | 0.466641892 | 0        |
| AC018816.3 | RYR1     | 0.533241092 | 0        |
| AC018816.3 | IL1RAP   | 0.365785622 | 2.74E-15 |
| AC018816.3 | SLC35F2  | 0.491145764 | 4.92E-28 |
| AC018816.3 | ISYNA1   | 0.689250731 | 0        |
| AC018816.3 | HLA-G    | 0.346977593 | 9.87E-14 |
| AC018816.3 | CDKN2B   | 0.355234641 | 2.20E-14 |
| AC018816.3 | ALDH1A3  | 0.24772394  | 1.60E-07 |
| AC018816.3 | CLIP3    | 0.473574466 | 0        |
| AC018816.3 | ULBP2    | 0.414618728 | 0        |
| AC018816.3 | ETHE1    | 0.567578869 | 0        |
| AC018816.3 | XPR1     | 0.29654428  | 2.83E-10 |
| AC018816.3 | SPTBN2   | 0.412126082 | 0        |
| AC018816.3 | IVL      | 0.4618965   | 1.39E-24 |
| AC018816.3 | MARCO    | 0.395760772 | 0        |
| AC018816.3 | PLXND1   | 0.411593909 | 0        |
| AC018816.3 | EMILIN2  | 0.442185341 | 0        |
| AC018816.3 | PLAUR    | 0.430914396 | 0        |
| AC018816.3 | CDC42EP5 | 0.619447147 | 0        |
| AC018816.3 | TRPC5    | 0.501928927 | 2.16E-29 |
| AC018816.3 | TMEM100  | 0.434537483 | 0        |
| AC018816.3 | QSOX1    | 0.476644814 | 0        |
| AC018816.3 | ARHGAP23 | 0.423567941 | 0        |
| AC018816.3 | MDF1     | 0.367560288 | 1.87E-15 |
| AC018816.3 | FSTL3    | 0.50991087  | 0        |
| AC018816.3 | INF2     | 0.625231265 | 0        |
| AC018816.3 | TGFBR1   | 0.538261134 | 0        |
| AC018816.3 | TGFBI    | 0.333600791 | 9.67E-13 |
| AC018816.3 | ERBB3    | 0.465893418 | 0        |
| AC018816.3 | CCL18    | 0.259594856 | 3.84E-08 |
| AC018816.3 | CCL17    | 0.440469908 | 2.92E-22 |
| AC018816.3 | C16orf45 | 0.533775818 | 0        |
| AC018816.3 | PRDM1    | 0.344168792 | 1.61E-13 |
| AC018816.3 | TRIM47   | 0.573616308 | 0        |
| AC018816.3 | CNFN     | 0.552165144 | 0        |
| AC018816.3 | ARMCX3   | 0.552767668 | 0        |
| AC018816.3 | RAMP1    | 0.595098109 | 0        |
| AC018816.3 | GABRD    | 0.402826105 | 0        |
| AC018816.3 | COL13A1  | 0.512249055 | 0        |
| AC018816.3 | S100A5   | 0.560097244 | 0        |
| AC018816.3 | MISP     | 0.342778079 | 2.05E-13 |
| AC018816.3 | HES6     | 0.459149913 | 0        |
| AC018816.3 | PSD3     | 0.354320501 | 2.61E-14 |

|            |           |             |          |
|------------|-----------|-------------|----------|
| AC018816.3 | DOK7      | 0.483276977 | 0        |
| AC018816.3 | ZMAT3     | 0.209852007 | 9.70E-06 |
| AC018816.3 | MFAP2     | 0.496440881 | 0        |
| AC018816.3 | TMEM79    | 0.639837795 | 0        |
| AC018816.3 | SLC1A5    | 0.490278767 | 0        |
| AC018816.3 | BBC3      | 0.501340077 | 0        |
| AC018816.3 | HLA-DQB2  | 0.428681454 | 0        |
| AC018816.3 | C1QL1     | 0.559722226 | 0        |
| AC018816.3 | TMEM215   | 0.359640773 | 7.51E-15 |
| AC018816.3 | PNP       | 0.415450177 | 0        |
| AC018816.3 | ARNTL     | 0.468232596 | 0        |
| AC018816.3 | CLDN2     | 0.576120959 | 3.50E-40 |
| AC018816.3 | MVP       | 0.605717455 | 0        |
| AC018816.3 | LGALS1    | 0.576054488 | 0        |
| AC018816.3 | BIRC7     | 0.545909662 | 1.84E-35 |
| AC018816.3 | COL8A1    | 0.44025125  | 0        |
| AC018816.3 | PERP      | 0.389846589 | 0        |
| AC018816.3 | GJA4      | 0.404829129 | 0        |
| AC018816.3 | IGFL2     | 0.505811803 | 6.81E-30 |
| AC018816.3 | DAPK2     | 0.514683973 | 0        |
| AC018816.3 | MAMLD1    | 0.484192252 | 0        |
| AC018816.3 | ETV5      | 0.391315029 | 0        |
| AC018816.3 | RUNX1     | 0.368733423 | 1.45E-15 |
| AC018816.3 | LONRF2    | 0.420230939 | 0        |
| AC018816.3 | SPOCK1    | 0.280260243 | 2.69E-09 |
| AC018816.3 | XKRX      | 0.397204106 | 0        |
| AC018816.3 | TGFB1     | 0.442714819 | 0        |
| AC018816.3 | ERP27     | 0.24716425  | 1.71E-07 |
| AC018816.3 | TNFRSF10C | 0.244943506 | 2.22E-07 |
| AC018816.3 | PALM      | 0.620257321 | 0        |
| AC018816.3 | TSC22D1   | 0.544792875 | 0        |
| AC018816.3 | TGM2      | 0.280922622 | 2.46E-09 |
| AC018816.3 | UBE2QL1   | 0.574914969 | 0        |
| AC018816.3 | ECE1      | 0.536806877 | 0        |
| AC018816.3 | COL8A2    | 0.442733116 | 0        |
| AC018816.3 | HIST3H2A  | 0.507870684 | 0        |
| AC018816.3 | TNFRSF21  | 0.297311619 | 2.54E-10 |
| AC018816.3 | SOX4      | 0.385779409 | 0        |
| AC018816.3 | ELF3      | 0.414175912 | 0        |
| AC018816.3 | TPD52L1   | 0.57020243  | 0        |
| AC018816.3 | INHBB     | 0.493588252 | 0        |
| AC018816.3 | HPN       | 0.533724331 | 0        |
| AC018816.3 | MMP7      | 0.330377489 | 1.22E-12 |
| AC018816.3 | RAB27A    | 0.480157553 | 0        |
| AC018816.3 | IGF2BP2   | 0.497147655 | 0        |
| AC018816.3 | ITGB4     | 0.43873104  | 0        |
| AC018816.3 | PPP1R1B   | 0.64457629  | 0        |
| AC018816.3 | NPDC1     | 0.63264339  | 0        |
| AC018816.3 | CCL13     | 0.45607923  | 6.15E-24 |
| AC018816.3 | SPINT1    | 0.514023153 | 0        |
| AC018816.3 | HEY2      | 0.592383346 | 0        |



|            |            |             |          |
|------------|------------|-------------|----------|
| AC018816.3 | CST2       | 0.370350392 | 1.02E-15 |
| AC018816.3 | ADM        | 0.42741811  | 0        |
| AC018816.3 | VSTM2L     | 0.315803919 | 1.64E-11 |
| AC018816.3 | FAM84A     | 0.397008371 | 0        |
| AC018816.3 | P4HA2      | 0.481187999 | 0        |
| AC018816.3 | LPL        | 0.385026112 | 0        |
| AC018816.3 | TMEM173    | 0.50816372  | 0        |
| AC018816.3 | DHRS3      | 0.671862634 | 0        |
| AC018816.3 | SCN1B      | 0.614862546 | 0        |
| AC018816.3 | GLT1D1     | 0.402268401 | 0        |
| AC018816.3 | PHYHIP     | 0.609255866 | 0        |
| AC018816.3 | BHLHE40    | 0.414853894 | 0        |
| AC018816.3 | BID        | 0.699212237 | 0        |
| AC018816.3 | POSTN      | 0.253106517 | 8.46E-08 |
| AC018816.3 | ITGA3      | 0.464429942 | 0        |
| AC018816.3 | RSPO4      | 0.512123387 | 0        |
| AC018816.3 | ADAMTS9    | 0.477884471 | 0        |
| AC018816.3 | ABTB2      | 0.431807544 | 0        |
| AC018816.3 | KCNQ3      | 0.38919811  | 0        |
| AC018816.3 | ANXA1      | 0.55139823  | 0        |
| AC018816.3 | S100A11    | 0.633665752 | 0        |
| AC018816.3 | CEACAM6    | 0.341498601 | 1.88E-13 |
| AC018816.3 | IER5L      | 0.634529682 | 0        |
| AC018816.3 | KRT80      | 0.312020555 | 2.92E-11 |
| AC018816.3 | CDH6       | 0.372694367 | 5.70E-16 |
| AC018816.3 | UNC5B      | 0.330360096 | 1.65E-12 |
| AC018816.3 | PLEKHN1    | 0.600822939 | 0        |
| AC018816.3 | SYTL1      | 0.576385962 | 0        |
| AC018816.3 | TMEM163    | 0.435047104 | 0        |
| AC018816.3 | C4orf48    | 0.500269349 | 0        |
| AC018816.3 | B3GNT7     | 0.478104744 | 0        |
| AC018816.3 | BAIAP3     | 0.595004922 | 0        |
| AC018816.3 | PHLDA2     | 0.606542663 | 0        |
| AC018816.3 | GAP43      | 0.539234451 | 1.75E-34 |
| AC018816.3 | S100A1     | 0.467744109 | 0        |
| AC018816.3 | PTPRE      | 0.466649977 | 0        |
| AC018816.3 | CCND1      | 0.317030952 | 1.36E-11 |
| AC018816.3 | ST6GALNAC5 | 0.377176971 | 2.74E-16 |
| AC018816.3 | KRT17      | 0.350155595 | 5.60E-14 |
| AC018816.3 | HPCAL4     | 0.646060474 | 0        |
| AC018816.3 | GABBR2     | 0.459431318 | 0        |
| AC018816.3 | DIRAS3     | 0.567621278 | 0        |
| AC018816.3 | SERINC2    | 0.476409365 | 0        |
| AC018816.3 | PTCHD4     | 0.29262759  | 4.93E-10 |
| AC018816.3 | EPS8       | 0.414418879 | 0        |
| AC018816.3 | LY6E       | 0.610726575 | 0        |
| AC018816.3 | UPP1       | 0.519317224 | 0        |
| AC018816.3 | AHNAK2     | 0.369642031 | 1.18E-15 |
| AC018816.3 | PLXNC1     | 0.559593013 | 0        |
| AC018816.3 | TNC        | 0.276648502 | 4.35E-09 |
| AC018816.3 | DUSP4      | 0.425922154 | 0        |

|            |         |             |          |
|------------|---------|-------------|----------|
| AC018816.3 | NRCAM   | 0.380980917 | 3.58E-17 |
| AC018816.3 | NRP2    | 0.548584607 | 0        |
| AC018816.3 | CTSC    | 0.560426589 | 0        |
| AC018816.3 | AMIGO2  | 0.529544533 | 0        |
| AC018816.3 | NAB2    | 0.632006542 | 0        |
| AC018816.3 | TBC1D2  | 0.45590085  | 0        |
| AC018816.3 | PHLDA3  | 0.522066454 | 0        |
| AC018816.3 | PTP4A3  | 0.584632656 | 0        |
| AC018816.3 | CRABP2  | 0.561088685 | 0        |
| AC018816.3 | GOS2    | 0.568400247 | 0        |
| AC018816.3 | S100A6  | 0.619579623 | 0        |
| AC018816.3 | FOXQ1   | 0.366518636 | 2.34E-15 |
| AC018816.3 | LRG1    | 0.550342111 | 0        |
| AC018816.3 | LAMP5   | 0.490912921 | 0        |
| AC018816.3 | ALDH3B1 | 0.458016776 | 0        |
| AC018816.3 | CDH2    | 0.18940505  | 6.71E-05 |
| AC018816.3 | SCG5    | 0.517017619 | 0        |
| AC018816.3 | ZCCHC16 | 0.570592766 | 2.79E-39 |
| AC018816.3 | GRB7    | 0.579538717 | 0        |
| AC018816.3 | TIAM1   | 0.372366014 | 6.19E-16 |
| AC018816.3 | FXD5    | 0.623230085 | 0        |
| AC018816.3 | CLDN9   | 0.533655966 | 0        |
| AC018816.3 | FAM43A  | 0.612820658 | 0        |
| AC018816.3 | CHST2   | 0.528919173 | 0        |
| AC018816.3 | HMGA2   | 0.549859865 | 0        |
| AC018816.3 | GALNT7  | 0.473862253 | 0        |
| AC018816.3 | CBLN1   | 0.449397901 | 0        |
| AC018816.3 | STRA6   | 0.526888632 | 0        |
| AC018816.3 | MUC21   | 0.482822124 | 5.10E-27 |
| AC018816.3 | PRR36   | 0.645583901 | 0        |
| AC018816.3 | NFE2L3  | 0.389478522 | 0        |
| AC018816.3 | NR1D1   | 0.344918968 | 1.42E-13 |
| AC018816.3 | MUC1    | 0.392366467 | 0        |
| AC018816.3 | NAT8L   | 0.481721874 | 0        |
| AC018816.3 | APOC1   | 0.499464139 | 0        |
| AC018816.3 | EVA1A   | 0.485362124 | 0        |
| AC018816.3 | ENTPD1  | 0.398898635 | 0        |
| AC018816.3 | COL1A1  | 0.427969006 | 0        |
| AC018816.3 | FNDC4   | 0.468426062 | 0        |
| AC018816.3 | FRMD3   | 0.40560512  | 0        |
| AC018816.3 | SHROOM4 | 0.490404576 | 0        |
| AC018816.3 | NELL2   | 0.500207791 | 0        |
| AC018816.3 | EPHB3   | 0.512541665 | 0        |
| AC018816.3 | TMC6    | 0.608177052 | 0        |
| AC018816.3 | NOD1    | 0.584278063 | 0        |
| AC018816.3 | GGCT    | 0.728020634 | 0        |
| AC018816.3 | ICAM1   | 0.413539773 | 0        |
| AC018816.3 | PRSS23  | 0.45607687  | 0        |
| AC018816.3 | CFI     | 0.486669295 | 0        |
| AC018816.3 | CD55    | 0.372646426 | 5.77E-16 |
| AC018816.3 | RASD2   | 0.528385014 | 0        |

|            |           |             |          |
|------------|-----------|-------------|----------|
| AC018816.3 | KLK11     | 0.512487186 | 9.05E-31 |
| AC018816.3 | ICAM5     | 0.60731908  | 0        |
| AC018816.3 | ADORA1    | 0.532402693 | 0        |
| AC018816.3 | ITGA2     | 0.330003659 | 1.74E-12 |
| AC018816.3 | ABCC3     | 0.416706996 | 0        |
| AC018816.3 | MFGE8     | 0.52733854  | 0        |
| AC018816.3 | STK32A    | 0.338392758 | 4.34E-13 |
| AC018816.3 | CYSLTR2   | 0.444555724 | 0        |
| AC018816.3 | LAD1      | 0.594579978 | 0        |
| AC018816.3 | MGAT3     | 0.349886247 | 5.87E-14 |
| AC018816.3 | IGFBP6    | 0.711618589 | 0        |
| AC018816.3 | CYP2S1    | 0.424234434 | 0        |
| AC018816.3 | KCNJ2     | 0.562421103 | 0        |
| AC018816.3 | FAM20A    | 0.534072683 | 0        |
| AC018816.3 | TGFA      | 0.503187364 | 0        |
| AC018816.3 | MXRA8     | 0.65998888  | 0        |
| AC018816.3 | C8orf4    | 0.332955857 | 1.08E-12 |
| AC018816.3 | CLDN10    | 0.601756546 | 1.37E-44 |
| AC018816.3 | PDE5A     | 0.494818122 | 0        |
| AC018816.3 | APOE      | 0.535327374 | 0        |
| AC018816.3 | SPOCK2    | 0.333939072 | 9.14E-13 |
| AC018816.3 | TENM1     | 0.519123759 | 0        |
| AC018816.3 | SLIT1     | 0.444659406 | 0        |
| AC018816.3 | CXCL14    | 0.344651605 | 1.48E-13 |
| AC018816.3 | ECM1      | 0.395161084 | 0        |
| AC018816.3 | DUSP5     | 0.466978897 | 0        |
| AC018816.3 | SEZ6L2    | 0.411003015 | 0        |
| AC018816.3 | THRSP     | 0.381403025 | 2.78E-17 |
| AC018816.3 | C19orf33  | 0.493960149 | 0        |
| AC018816.3 | MPZL2     | 0.525938465 | 0        |
| AC018816.3 | CTSH      | 0.69660371  | 0        |
| AC018816.3 | CYP1B1    | 0.510273122 | 0        |
| AC018816.3 | ALOX5     | 0.356503232 | 1.73E-14 |
| AC018816.3 | SYTL5     | 0.466666376 | 4.00E-25 |
| AC018816.3 | TNFRSF12A | 0.614082583 | 0        |
| AC018816.3 | DUSP6     | 0.497819538 | 0        |
| AC018816.3 | ALOX15B   | 0.492613831 | 0        |
| AC018816.3 | SDC4      | 0.638646647 | 0        |
| AC018816.3 | MDK       | 0.625913502 | 0        |
| AC018816.3 | KRT19     | 0.485614736 | 0        |
| AC018816.3 | MET       | 0.452031817 | 0        |
| AC018816.3 | TESC      | 0.609158282 | 0        |
| AC018816.3 | CXCL17    | 0.551065926 | 3.11E-36 |
| AC018816.3 | NPC2      | 0.785878128 | 0        |
| AC018816.3 | COMP      | 0.50242967  | 0        |
| AC018816.3 | TUSC3     | 0.493106148 | 0        |
| AC018816.3 | TMPRSS4   | 0.474350741 | 0        |
| AC018816.3 | LGALS3    | 0.619488989 | 0        |
| AC018816.3 | CRLF1     | 0.35341714  | 3.09E-14 |
| AC018816.3 | CTXN1     | 0.623384262 | 0        |
| AC018816.3 | PCSK1N    | 0.402185285 | 0        |

|            |          |             |          |
|------------|----------|-------------|----------|
| AC018816.3 | NMU      | 0.441411399 | 2.33E-22 |
| AC018816.3 | GALE     | 0.730068621 | 0        |
| AC018816.3 | PCSK2    | 0.261600859 | 2.99E-08 |
| AC018816.3 | GJB3     | 0.637954907 | 0        |
| AC018816.3 | SLPI     | 0.36675593  | 2.23E-15 |
| AC018816.3 | AGR2     | 0.316021781 | 1.59E-11 |
| AC018816.3 | MRC2     | 0.456501389 | 0        |
| AC018816.3 | GOLT1A   | 0.699294218 | 0        |
| AC018816.3 | SLC27A6  | 0.370783479 | 9.37E-16 |
| AC018816.3 | KCNN4    | 0.578848396 | 0        |
| AC018816.3 | ETV4     | 0.507017552 | 4.74E-30 |
| AC018816.3 | SYT12    | 0.670388662 | 0        |
| AC018816.3 | PVRL4    | 0.593350959 | 0        |
| AC018816.3 | PLCD3    | 0.571006788 | 0        |
| AC018816.3 | PLAU     | 0.472292967 | 0        |
| AC018816.3 | LRRK2    | 0.417288386 | 0        |
| AC018816.3 | SFN      | 0.50586766  | 0        |
| AC018816.3 | LPAR5    | 0.511486396 | 0        |
| AC018816.3 | NGEF     | 0.514413489 | 0        |
| AC018816.3 | DTX4     | 0.532411345 | 0        |
| AC018816.3 | CST6     | 0.638450486 | 0        |
| AC018816.3 | QPCT     | 0.606814565 | 0        |
| AC018816.3 | TIMP1    | 0.756867187 | 0        |
| AC018816.3 | CAMK2N1  | 0.623647796 | 0        |
| AC018816.3 | KLHDC8A  | 0.381215658 | 3.13E-17 |
| AC018816.3 | PDLIM4   | 0.690287135 | 0        |
| AC018816.3 | SCEL     | 0.406551883 | 0        |
| AC018816.3 | LCN2     | 0.45453042  | 0        |
| AC018816.3 | PROS1    | 0.441190212 | 0        |
| AC018816.3 | GABRB2   | 0.538891032 | 0        |
| AC018816.3 | TMPRSS6  | 0.568420105 | 0        |
| AC018816.3 | KLK7     | 0.497155451 | 8.73E-29 |
| AC018816.3 | PDZK1IP1 | 0.528116375 | 0        |
| AC018816.3 | CDH3     | 0.500631743 | 0        |
| AC018816.3 | LRP4     | 0.469954357 | 0        |
| AC018816.3 | IGSF1    | 0.311332361 | 3.24E-11 |
| AC018816.3 | B3GNT3   | 0.387342313 | 0        |
| AC018816.3 | CLDN1    | 0.345270157 | 1.33E-13 |
| AC018816.3 | GDF15    | 0.449004303 | 0        |
| AC018816.3 | ARHGAP36 | 0.331311956 | 1.05E-12 |
| AC018816.3 | LAMB3    | 0.470944947 | 0        |
| AC018816.3 | KLK10    | 0.616982585 | 0        |
| AC018816.3 | DPP4     | 0.373676163 | 4.45E-16 |
| AC018816.3 | METTL7B  | 0.666119506 | 0        |
| AC018816.3 | LIPH     | 0.523395467 | 0        |
| AC018816.3 | CLDN16   | 0.411605256 | 0        |
| AC018816.3 | CHI3L1   | 0.558443706 | 0        |
| AC018816.3 | SLC22A31 | 0.708741603 | 3.27E-68 |
| AC018816.3 | TACSTD2  | 0.564457884 | 0        |
| AC018816.3 | SFTPB    | 0.490106576 | 0        |
| AC018816.3 | RXRG     | 0.652861139 | 0        |

|              |           |              |          |
|--------------|-----------|--------------|----------|
| AC018816.3   | DCSTAMP   | 0.565886248  | 1.58E-38 |
| AC018816.3   | CITED1    | 0.685078592  | 0        |
| AC018816.3   | SERPINA1  | 0.658534198  | 0        |
| AC018816.3   | PRR15     | 0.624763203  | 0        |
| AC018816.3   | SLC34A2   | 0.42595194   | 0        |
| AC018816.3   | FN1       | 0.415726617  | 0        |
| AC018816.3   | ZCCHC12   | 0.48195704   | 0        |
| CTC-255N20.1 | TFF3      | -0.353330761 | 3.14E-14 |
| CTC-255N20.1 | CCL21     | -0.372065096 | 7.34E-16 |
| CTC-255N20.1 | TPO       | -0.382161428 | 1.56E-17 |
| CTC-255N20.1 | MT1G      | -0.346034517 | 1.17E-13 |
| CTC-255N20.1 | DIO1      | -0.318282381 | 1.12E-11 |
| CTC-255N20.1 | DPT       | -0.366417423 | 2.14E-15 |
| CTC-255N20.1 | CDH16     | -0.423135764 | 0        |
| CTC-255N20.1 | CRABP1    | -0.386677796 | 4.17E-17 |
| CTC-255N20.1 | SLC26A7   | -0.333759223 | 9.42E-13 |
| CTC-255N20.1 | MT1H      | -0.359952195 | 7.10E-15 |
| CTC-255N20.1 | SLC26A4   | -0.303977822 | 9.68E-11 |
| CTC-255N20.1 | SLC5A8    | -0.383927096 | 7.24E-17 |
| CTC-255N20.1 | PKHD1L1   | -0.329580251 | 1.39E-12 |
| CTC-255N20.1 | TFCP2L1   | -0.441130641 | 0        |
| CTC-255N20.1 | WSCD2     | -0.342297972 | 1.64E-13 |
| CTC-255N20.1 | IPCEF1    | -0.324059833 | 4.53E-12 |
| CTC-255N20.1 | SLC5A5    | -0.339794279 | 2.52E-13 |
| CTC-255N20.1 | MT1F      | -0.364379307 | 3.67E-15 |
| CTC-255N20.1 | FOSB      | -0.199366839 | 2.68E-05 |
| CTC-255N20.1 | SEMA3D    | -0.312177651 | 2.23E-11 |
| CTC-255N20.1 | BMP8A     | -0.274453856 | 5.81E-09 |
| CTC-255N20.1 | MATN2     | -0.380349742 | 4.96E-17 |
| CTC-255N20.1 | PLA2R1    | -0.288006961 | 9.39E-10 |
| CTC-255N20.1 | COL23A1   | -0.337020342 | 5.47E-13 |
| CTC-255N20.1 | HGD       | -0.339142368 | 3.83E-13 |
| CTC-255N20.1 | TCEAL2    | -0.218428615 | 4.07E-06 |
| CTC-255N20.1 | CHRD1     | -0.282421922 | 1.71E-09 |
| CTC-255N20.1 | TNFRSF11B | -0.301366601 | 1.42E-10 |
| CTC-255N20.1 | FAM167A   | -0.345179665 | 1.35E-13 |
| CTC-255N20.1 | KIT       | -0.363253262 | 4.63E-15 |
| CTC-255N20.1 | SLC4A4    | -0.384635351 | 0        |
| CTC-255N20.1 | SMOC2     | -0.282479994 | 2.00E-09 |
| CTC-255N20.1 | FHL1      | -0.267997714 | 1.34E-08 |
| CTC-255N20.1 | OTOS      | -0.340447127 | 3.07E-13 |
| CTC-255N20.1 | IGFBPL1   | -0.451997273 | 1.72E-23 |
| CTC-255N20.1 | HBB       | -0.32681587  | 2.92E-12 |
| CTC-255N20.1 | BEX1      | -0.239640216 | 4.08E-07 |
| CTC-255N20.1 | FABP4     | -0.409598602 | 3.45E-19 |
| CTC-255N20.1 | LMOD1     | -0.327349461 | 2.68E-12 |
| CTC-255N20.1 | SOD3      | -0.393454358 | 0        |
| CTC-255N20.1 | TMEM171   | -0.439365194 | 0        |
| CTC-255N20.1 | PI16      | -0.322705004 | 5.61E-12 |
| CTC-255N20.1 | ZMAT4     | -0.34621853  | 8.30E-14 |
| CTC-255N20.1 | MFAP4     | -0.280128476 | 2.74E-09 |

|              |            |              |             |
|--------------|------------|--------------|-------------|
| CTC-255N20.1 | CWH43      | -0.43381498  | 1.43E-21    |
| CTC-255N20.1 | SPX        | -0.337178207 | 5.33E-13    |
| CTC-255N20.1 | APOD       | -0.306184666 | 6.99E-11    |
| CTC-255N20.1 | DPP6       | -0.37526559  | 2.90E-16    |
| CTC-255N20.1 | MMRN1      | -0.358740004 | 1.13E-14    |
| CTC-255N20.1 | WDR72      | -0.370142575 | 1.05E-15    |
| CTC-255N20.1 | MPPED2     | -0.361895029 | 6.09E-15    |
| CTC-255N20.1 | PAPSS2     | -0.436544479 | 0           |
| CTC-255N20.1 | DCN        | -0.288213618 | 9.12E-10    |
| CTC-255N20.1 | SORBS2     | -0.271144796 | 8.93E-09    |
| CTC-255N20.1 | EGR2       | -0.165669599 | 0.000499528 |
| CTC-255N20.1 | EDN3       | -0.160785833 | 0.000721551 |
| CTC-255N20.1 | DIO2       | -0.391314887 | 0           |
| CTC-255N20.1 | ITPR1      | -0.279081576 | 3.15E-09    |
| CTC-255N20.1 | CFD        | -0.314895168 | 1.89E-11    |
| CTC-255N20.1 | CPXM1      | -0.33677312  | 5.70E-13    |
| CTC-255N20.1 | ELMO1      | -0.34755487  | 8.91E-14    |
| CTC-255N20.1 | GPC3       | -0.391343836 | 1.62E-17    |
| CTC-255N20.1 | MYOC       | -0.248577595 | 1.32E-07    |
| CTC-255N20.1 | DEPTOR     | -0.403706346 | 0           |
| CTC-255N20.1 | DGKI       | -0.325498912 | 3.60E-12    |
| CTC-255N20.1 | CARTPT     | -0.222844839 | 2.41E-06    |
| CTC-255N20.1 | IYD        | -0.297057731 | 2.63E-10    |
| CTC-255N20.1 | LYVE1      | -0.316302476 | 1.52E-11    |
| CTC-255N20.1 | CLCNKB     | -0.335130646 | 7.50E-13    |
| CTC-255N20.1 | NCAM1      | -0.490743567 | 0           |
| CTC-255N20.1 | HBA2       | -0.314163998 | 2.11E-11    |
| CTC-255N20.1 | GLT8D2     | -0.34672881  | 1.03E-13    |
| CTC-255N20.1 | OGDHL      | -0.452108693 | 0           |
| CTC-255N20.1 | LIFR       | -0.402897874 | 0           |
| CTC-255N20.1 | CSGALNACT1 | -0.300303106 | 1.65E-10    |
| CTC-255N20.1 | RAP1GAP    | -0.40766885  | 0           |
| CTC-255N20.1 | COL9A3     | -0.312296145 | 2.80E-11    |
| CTC-255N20.1 | FBLN1      | -0.344316302 | 1.57E-13    |
| CTC-255N20.1 | EFEMP1     | -0.310164191 | 3.86E-11    |
| CTC-255N20.1 | AOX1       | -0.401359878 | 2.02E-18    |
| CTC-255N20.1 | GRIN2C     | -0.268620095 | 1.24E-08    |
| CTC-255N20.1 | C11orf74   | -0.390565136 | 0           |
| CTC-255N20.1 | PPARGC1A   | -0.43174003  | 0           |
| CTC-255N20.1 | ANGPTL1    | -0.271005086 | 9.09E-09    |
| CTC-255N20.1 | SCARA5     | -0.354245507 | 2.00E-14    |
| CTC-255N20.1 | LTF        | -0.347882939 | 8.40E-14    |
| CTC-255N20.1 | CA4        | -0.260605042 | 3.01E-08    |
| CTC-255N20.1 | TG         | -0.251460497 | 1.03E-07    |
| CTC-255N20.1 | FCGBP      | -0.364882545 | 3.31E-15    |
| CTC-255N20.1 | PBX4       | -0.336037411 | 6.45E-13    |
| CTC-255N20.1 | CYR61      | -0.241164823 | 3.43E-07    |
| CTC-255N20.1 | FOS        | -0.218240255 | 4.15E-06    |
| CTC-255N20.1 | KHDRBS2    | -0.335932735 | 6.57E-13    |
| CTC-255N20.1 | MUM1L1     | -0.294780252 | 3.64E-10    |
| CTC-255N20.1 | RGS16      | -0.355170247 | 2.23E-14    |

|              |          |              |             |
|--------------|----------|--------------|-------------|
| CTC-255N20.1 | MT1M     | -0.387883705 | 0           |
| CTC-255N20.1 | LRP2     | -0.226318022 | 1.77E-06    |
| CTC-255N20.1 | MAFB     | -0.327965034 | 2.42E-12    |
| CTC-255N20.1 | KCNK2    | -0.361736313 | 6.28E-15    |
| CTC-255N20.1 | TBC1D4   | -0.281100628 | 2.40E-09    |
| CTC-255N20.1 | MIOX     | -0.342777098 | 1.51E-13    |
| CTC-255N20.1 | TPPP     | -0.369818193 | 1.13E-15    |
| CTC-255N20.1 | FMOD     | -0.384994057 | 0           |
| CTC-255N20.1 | CITED2   | -0.396299327 | 0           |
| CTC-255N20.1 | RGS8     | -0.402584762 | 1.56E-18    |
| CTC-255N20.1 | ABI3BP   | -0.378536212 | 1.04E-16    |
| CTC-255N20.1 | ADH1B    | -0.335115993 | 5.55E-13    |
| CTC-255N20.1 | OGN      | -0.319805653 | 6.76E-12    |
| CTC-255N20.1 | NR4A1    | -0.147713444 | 0.001933073 |
| CTC-255N20.1 | FOXJ1    | -0.296619822 | 2.29E-10    |
| CTC-255N20.1 | ALDH1A1  | -0.233115708 | 8.47E-07    |
| CTC-255N20.1 | OCA2     | -0.302766797 | 9.28E-11    |
| CTC-255N20.1 | TMEM139  | -0.34532519  | 1.32E-13    |
| CTC-255N20.1 | ARHGAP24 | -0.336418244 | 6.05E-13    |
| CTC-255N20.1 | SLC25A15 | -0.371135435 | 8.33E-16    |
| CTC-255N20.1 | DES      | -0.349334513 | 4.80E-14    |
| CTC-255N20.1 | GDF10    | -0.353490722 | 2.29E-14    |
| CTC-255N20.1 | KIAA1324 | -0.211771773 | 8.01E-06    |
| CTC-255N20.1 | JUN      | -0.245025772 | 2.20E-07    |
| CTC-255N20.1 | C7       | -0.163152699 | 0.000609004 |
| CTC-255N20.1 | LGI3     | -0.372316796 | 6.26E-16    |
| CTC-255N20.1 | CDON     | -0.299369534 | 1.89E-10    |
| CTC-255N20.1 | BCL2     | -0.347632738 | 8.79E-14    |
| CTC-255N20.1 | HLF      | -0.288758698 | 8.46E-10    |
| CTC-255N20.1 | EGR1     | -0.205669088 | 1.46E-05    |
| CTC-255N20.1 | IP6K3    | -0.388961951 | 0           |
| CTC-255N20.1 | SCUBE3   | -0.265961783 | 1.73E-08    |
| CTC-255N20.1 | PKNOX2   | -0.267815737 | 1.37E-08    |
| CTC-255N20.1 | SMAD9    | -0.268083951 | 1.32E-08    |
| CTC-255N20.1 | IQGAP2   | -0.372324739 | 6.25E-16    |
| CTC-255N20.1 | GNA14    | -0.297914285 | 2.33E-10    |
| CTC-255N20.1 | LAYN     | -0.369732665 | 1.15E-15    |
| CTC-255N20.1 | AVPR1A   | -0.375005603 | 3.12E-16    |
| CTC-255N20.1 | PDLIM3   | -0.401245188 | 0           |
| CTC-255N20.1 | GPM6A    | -0.360252413 | 8.43E-15    |
| CTC-255N20.1 | SDPR     | -0.216007029 | 5.22E-06    |
| CTC-255N20.1 | CRYAB    | -0.460926991 | 0           |
| CTC-255N20.1 | FOXA2    | -0.219585874 | 3.41E-06    |
| CTC-255N20.1 | C8orf88  | -0.28739465  | 1.02E-09    |
| CTC-255N20.1 | ISM1     | -0.153348633 | 0.001283419 |
| CTC-255N20.1 | BMP2     | -0.283357966 | 1.77E-09    |
| CTC-255N20.1 | ID4      | -0.315002397 | 1.86E-11    |
| CTC-255N20.1 | NUPR1    | -0.442524474 | 0           |
| CTC-255N20.1 | SERTM1   | -0.429543003 | 3.89E-21    |
| CTC-255N20.1 | IRS1     | -0.205182871 | 1.53E-05    |
| CTC-255N20.1 | FIBIN    | -0.375596354 | 2.65E-16    |

|              |          |              |             |
|--------------|----------|--------------|-------------|
| CTC-255N20.1 | PODN     | -0.299362726 | 1.89E-10    |
| CTC-255N20.1 | TDRD9    | -0.359213456 | 1.03E-14    |
| CTC-255N20.1 | EPHA3    | -0.312739386 | 2.62E-11    |
| CTC-255N20.1 | AIF1L    | -0.412124238 | 0           |
| CTC-255N20.1 | EBF4     | -0.324680228 | 4.10E-12    |
| CTC-255N20.1 | ADM2     | -0.428763719 | 0           |
| CTC-255N20.1 | GSTM3    | -0.373311074 | 4.88E-16    |
| CTC-255N20.1 | HSD17B6  | -0.216302476 | 5.06E-06    |
| CTC-255N20.1 | AGR3     | -0.28931169  | 6.53E-10    |
| CTC-255N20.1 | EPHB1    | -0.433476683 | 0           |
| CTC-255N20.1 | TMOD1    | -0.274631153 | 5.67E-09    |
| CTC-255N20.1 | WASF3    | -0.237766547 | 5.04E-07    |
| CTC-255N20.1 | SELV     | -0.312632816 | 2.08E-11    |
| CTC-255N20.1 | ENPP1    | -0.234296077 | 7.43E-07    |
| CTC-255N20.1 | SYNE1    | -0.23688908  | 5.14E-07    |
| CTC-255N20.1 | PLCH1    | -0.286225061 | 1.20E-09    |
| CTC-255N20.1 | CCDC146  | -0.297255452 | 2.56E-10    |
| CTC-255N20.1 | SLC16A2  | -0.20622509  | 1.39E-05    |
| CTC-255N20.1 | IER2     | -0.287704706 | 9.79E-10    |
| CTC-255N20.1 | KCNAB1   | -0.109012331 | 0.022391659 |
| CTC-255N20.1 | SYNDIG1  | -0.401882888 | 0           |
| CTC-255N20.1 | C16orf89 | -0.25845406  | 4.42E-08    |
| CTC-255N20.1 | CTGF     | -0.144687916 | 0.002394977 |
| CTC-255N20.1 | NR4A3    | -0.17135585  | 0.00031598  |
| CTC-255N20.1 | KIAA1456 | -0.28324407  | 1.80E-09    |
| CTC-255N20.1 | AQP4     | -0.20330906  | 1.84E-05    |
| CTC-255N20.1 | RNF150   | -0.373201292 | 5.02E-16    |
| CTC-255N20.1 | C1S      | -0.238861388 | 4.46E-07    |
| CTC-255N20.1 | PFKFB2   | -0.324063237 | 4.52E-12    |
| CTC-255N20.1 | PROX1    | -0.274918373 | 5.46E-09    |
| CTC-255N20.1 | TCF7L1   | -0.329945506 | 1.76E-12    |
| CTC-255N20.1 | HSPB6    | -0.303867473 | 9.83E-11    |
| CTC-255N20.1 | FHDC1    | -0.360193267 | 8.53E-15    |
| CTC-255N20.1 | PRR15L   | -0.347446506 | 9.08E-14    |
| CTC-255N20.1 | SLC1A1   | -0.319687136 | 9.00E-12    |
| CTC-255N20.1 | BTBD11   | -0.304845724 | 8.52E-11    |
| CTC-255N20.1 | TRIM58   | -0.269321196 | 1.13E-08    |
| CTC-255N20.1 | LRIG1    | -0.402575762 | 0           |
| CTC-255N20.1 | ROR2     | -0.349008558 | 6.88E-14    |
| CTC-255N20.1 | GPR125   | -0.288092631 | 9.28E-10    |
| CTC-255N20.1 | FLRT1    | -0.323545815 | 4.91E-12    |
| CTC-255N20.1 | PGF      | -0.338986205 | 3.93E-13    |
| CTC-255N20.1 | DUSP1    | -0.214807655 | 5.89E-06    |
| CTC-255N20.1 | PLA2G7   | -0.371585626 | 7.48E-16    |
| CTC-255N20.1 | PLSCR4   | -0.213743451 | 6.57E-06    |
| CTC-255N20.1 | FAM46B   | -0.40352834  | 0           |
| CTC-255N20.1 | GLDC     | -0.367685105 | 1.82E-15    |
| CTC-255N20.1 | ZBTB16   | -0.237825552 | 5.01E-07    |
| CTC-255N20.1 | OMD      | -0.279107534 | 2.68E-09    |
| CTC-255N20.1 | HSD11B2  | -0.300971443 | 1.50E-10    |
| CTC-255N20.1 | FGL2     | -0.27375233  | 6.36E-09    |



|              |          |              |             |
|--------------|----------|--------------|-------------|
| CTC-255N20.1 | CLCNKA   | -0.294126535 | 3.29E-10    |
| CTC-255N20.1 | GATM     | -0.290258626 | 6.87E-10    |
| CTC-255N20.1 | TNS3     | -0.404299651 | 0           |
| CTC-255N20.1 | TOB1     | -0.306252181 | 6.92E-11    |
| CTC-255N20.1 | MARC2    | -0.367098466 | 2.07E-15    |
| CTC-255N20.1 | LRRC2    | -0.270012226 | 1.03E-08    |
| CTC-255N20.1 | SORD     | -0.33235773  | 1.19E-12    |
| CTC-255N20.1 | RIMS4    | -0.246678316 | 1.81E-07    |
| CTC-255N20.1 | SLC29A4  | -0.359960513 | 8.92E-15    |
| CTC-255N20.1 | SLC39A14 | -0.384022615 | 0           |
| CTC-255N20.1 | FAXDC2   | -0.324085647 | 4.51E-12    |
| CTC-255N20.1 | HSPB8    | -0.367587095 | 1.86E-15    |
| CTC-255N20.1 | CCL19    | -0.16416889  | 0.000553626 |
| CTC-255N20.1 | KCNIP3   | -0.308673199 | 4.83E-11    |
| CTC-255N20.1 | CGNL1    | -0.114694327 | 0.016249005 |
| CTC-255N20.1 | ATF3     | -0.107180363 | 0.024761081 |
| CTC-255N20.1 | SGCD     | -0.298129594 | 2.26E-10    |
| CTC-255N20.1 | STARD13  | -0.30253392  | 1.20E-10    |
| CTC-255N20.1 | LDHD     | -0.357382197 | 1.47E-14    |
| CTC-255N20.1 | RCAN1    | -0.269379065 | 1.12E-08    |
| CTC-255N20.1 | ID3      | -0.378570395 | 1.03E-16    |
| CTC-255N20.1 | SYTL3    | -0.453871728 | 0           |
| CTC-255N20.1 | MT1E     | -0.248357384 | 1.49E-07    |
| CTC-255N20.1 | CAMK1D   | -0.36900036  | 1.36E-15    |
| CTC-255N20.1 | PRKCQ    | -0.406165518 | 0           |
| CTC-255N20.1 | NUAK2    | -0.452295067 | 0           |
| CTC-255N20.1 | LIPG     | -0.145901474 | 0.002198782 |
| CTC-255N20.1 | SLC25A25 | -0.317508943 | 1.26E-11    |
| CTC-255N20.1 | PRKX     | -0.331401748 | 1.39E-12    |
| CTC-255N20.1 | SRPX     | -0.203296153 | 1.84E-05    |
| CTC-255N20.1 | FAM189A1 | -0.329877283 | 1.78E-12    |
| CTC-255N20.1 | PLEKHH1  | -0.139754678 | 0.003368052 |
| CTC-255N20.1 | WNT11    | -0.419927124 | 0           |
| CTC-255N20.1 | SNAI1    | -0.338702672 | 4.12E-13    |
| CTC-255N20.1 | FDCSP    | -0.131223926 | 0.005895751 |
| CTC-255N20.1 | MT1X     | -0.248250723 | 1.51E-07    |
| CTC-255N20.1 | ACACB    | -0.321473574 | 6.81E-12    |
| CTC-255N20.1 | ARC      | -0.093735905 | 0.049707469 |
| CTC-255N20.1 | KLK4     | -0.492613703 | 3.24E-28    |
| CTC-255N20.1 | ZFPM2    | -0.176204268 | 0.000211419 |
| CTC-255N20.1 | AKAP12   | -0.202524701 | 1.98E-05    |
| CTC-255N20.1 | GJB6     | -0.331915671 | 9.47E-13    |
| CTC-255N20.1 | ERO1LB   | -0.281391394 | 2.31E-09    |
| CTC-255N20.1 | DNALI1   | -0.21414258  | 6.31E-06    |
| CTC-255N20.1 | HKDC1    | -0.334352953 | 8.54E-13    |
| CTC-255N20.1 | ZFP36L2  | -0.320150943 | 8.37E-12    |
| CTC-255N20.1 | CAPSL    | -0.240970451 | 3.22E-07    |
| CTC-255N20.1 | CYP7B1   | -0.250792444 | 1.12E-07    |
| CTC-255N20.1 | CPQ      | -0.110199083 | 0.020963916 |
| CTC-255N20.1 | RPS6KA6  | -0.304139031 | 7.56E-11    |
| CTC-255N20.1 | TLE1     | -0.471804906 | 0           |

|              |          |              |             |
|--------------|----------|--------------|-------------|
| CTC-255N20.1 | TP53INP2 | -0.291096032 | 6.11E-10    |
| CTC-255N20.1 | KATNAL2  | -0.309414156 | 4.32E-11    |
| CTC-255N20.1 | SGPP2    | -0.321579527 | 6.70E-12    |
| CTC-255N20.1 | CTH      | -0.349197769 | 6.65E-14    |
| CTC-255N20.1 | KIF12    | -0.283731423 | 1.69E-09    |
| CTC-255N20.1 | TMEM220  | -0.23616322  | 6.04E-07    |
| CTC-255N20.1 | CENPJ    | -0.165607191 | 0.000502005 |
| CTC-255N20.1 | FAM155B  | -0.083351158 | 0.08108197  |
| CTC-255N20.1 | WFS1     | -0.386618801 | 0           |
| CTC-255N20.1 | SELENBP1 | -0.252060326 | 9.59E-08    |
| CTC-255N20.1 | SNTA1    | -0.437113955 | 0           |
| CTC-255N20.1 | FRAS1    | -0.292389587 | 5.10E-10    |
| CTC-255N20.1 | FBLN7    | -0.420633473 | 0           |
| CTC-255N20.1 | AGPAT9   | -0.21783843  | 4.32E-06    |
| CTC-255N20.1 | GPR83    | -0.210640196 | 8.97E-06    |
| CTC-255N20.1 | PRTG     | -0.240538045 | 3.68E-07    |
| CTC-255N20.1 | EGR3     | -0.089968711 | 0.059652573 |
| CTC-255N20.1 | GRAMD2   | -0.342510007 | 2.15E-13    |
| CTC-255N20.1 | HYOU1    | -0.327231595 | 2.73E-12    |
| CTC-255N20.1 | FBLN5    | -0.303042265 | 1.11E-10    |
| CTC-255N20.1 | ITM2A    | -0.247627774 | 1.62E-07    |
| CTC-255N20.1 | SRF      | -0.302536332 | 1.19E-10    |
| CTC-255N20.1 | FGFR2    | -0.327550019 | 2.59E-12    |
| CTC-255N20.1 | MT1A     | -0.307942465 | 4.26E-11    |
| CTC-255N20.1 | MAMDC2   | -0.187765129 | 7.77E-05    |
| CTC-255N20.1 | FHL2     | -0.42488958  | 0           |
| CTC-255N20.1 | FTCDNL1  | -0.456929169 | 0           |
| CTC-255N20.1 | PKIA     | -0.151024348 | 0.001522153 |
| CTC-255N20.1 | DNAJB4   | -0.155897588 | 0.001061568 |
| CTC-255N20.1 | SLC25A33 | -0.420003291 | 0           |
| CTC-255N20.1 | EYA2     | -0.430229464 | 0           |
| CTC-255N20.1 | LPAR1    | -0.42433216  | 0           |
| CTC-255N20.1 | STX11    | -0.319739899 | 8.93E-12    |
| CTC-255N20.1 | ARHGEF28 | -0.352985246 | 3.34E-14    |
| CTC-255N20.1 | OR2W3    | -0.266852946 | 1.55E-08    |
| CTC-255N20.1 | ALDH1B1  | -0.569022436 | 4.98E-39    |
| CTC-255N20.1 | CXCL12   | -0.257753952 | 4.81E-08    |
| CTC-255N20.1 | OLFM2    | -0.18508384  | 9.86E-05    |
| CTC-255N20.1 | TUB      | -0.27820942  | 3.54E-09    |
| CTC-255N20.1 | HTRA3    | -0.253175024 | 8.39E-08    |
| CTC-255N20.1 | CKB      | -0.429165544 | 0           |
| CTC-255N20.1 | RGS2     | -0.262338696 | 2.73E-08    |
| CTC-255N20.1 | SHANK2   | -0.237840445 | 5.00E-07    |
| CTC-255N20.1 | CNTFR    | -0.206613154 | 1.28E-05    |
| CTC-255N20.1 | CYTH3    | -0.35951018  | 9.74E-15    |
| CTC-255N20.1 | PLAC9    | -0.275571249 | 5.01E-09    |
| CTC-255N20.1 | WWOX     | -0.299180749 | 1.94E-10    |
| CTC-255N20.1 | NPR3     | -0.20238102  | 2.01E-05    |
| CTC-255N20.1 | SDC2     | -0.115409753 | 0.015591441 |
| CTC-255N20.1 | KLF15    | -0.268432444 | 1.27E-08    |
| CTC-255N20.1 | TMEM164  | -0.351147746 | 4.68E-14    |

|              |          |              |             |
|--------------|----------|--------------|-------------|
| CTC-255N20.1 | LONRF3   | 0.026338162  | 0.581928258 |
| CTC-255N20.1 | GBP1     | -0.153520823 | 0.001267183 |
| CTC-255N20.1 | ARHGAP6  | -0.315394719 | 1.75E-11    |
| CTC-255N20.1 | TMEM119  | -0.271607327 | 8.41E-09    |
| CTC-255N20.1 | SH3RF1   | -0.282731329 | 1.93E-09    |
| CTC-255N20.1 | CRELD2   | -0.347195596 | 9.49E-14    |
| CTC-255N20.1 | PCP4     | -0.273320152 | 6.73E-09    |
| CTC-255N20.1 | GCSH     | -0.316212977 | 1.54E-11    |
| CTC-255N20.1 | IMPA2    | -0.372081063 | 6.64E-16    |
| CTC-255N20.1 | C1R      | -0.229524817 | 1.25E-06    |
| CTC-255N20.1 | SUCNR1   | -0.232298301 | 9.27E-07    |
| CTC-255N20.1 | SFRP1    | -0.249166423 | 1.35E-07    |
| CTC-255N20.1 | UGT8     | -0.459815981 | 0           |
| CTC-255N20.1 | TLE4     | -0.265698534 | 1.79E-08    |
| CTC-255N20.1 | ANTXR1   | -0.211037766 | 8.62E-06    |
| CTC-255N20.1 | GPX3     | -0.255463566 | 6.36E-08    |
| CTC-255N20.1 | DPY19L2  | -0.188490626 | 7.28E-05    |
| CTC-255N20.1 | FAM46C   | -0.336805317 | 5.67E-13    |
| CTC-255N20.1 | IL33     | -0.240894774 | 3.25E-07    |
| CTC-255N20.1 | PEG3     | -0.230985882 | 1.07E-06    |
| CTC-255N20.1 | FAHD2A   | -0.429257312 | 0           |
| CTC-255N20.1 | PTGDS    | -0.278022337 | 3.63E-09    |
| CTC-255N20.1 | CHCHD10  | -0.426742824 | 0           |
| CTC-255N20.1 | CD36     | -0.332094764 | 1.24E-12    |
| CTC-255N20.1 | ANKRD37  | -0.246337623 | 1.89E-07    |
| CTC-255N20.1 | TSPAN33  | -0.455403144 | 0           |
| CTC-255N20.1 | PRDM16   | -0.204096824 | 1.70E-05    |
| CTC-255N20.1 | UST      | -0.18761237  | 7.88E-05    |
| CTC-255N20.1 | NEXN     | -0.315056437 | 1.84E-11    |
| CTC-255N20.1 | NUPR1L   | -0.133081147 | 0.005224715 |
| CTC-255N20.1 | SLC24A3  | -0.439605324 | 0           |
| CTC-255N20.1 | MARC1    | -0.228680744 | 1.37E-06    |
| CTC-255N20.1 | MYH11    | -0.214340159 | 6.18E-06    |
| CTC-255N20.1 | APOA1    | -0.309379488 | 3.43E-11    |
| CTC-255N20.1 | TMEM178B | -0.19320898  | 4.75E-05    |
| CTC-255N20.1 | CAPNG    | -0.217157057 | 4.39E-06    |
| CTC-255N20.1 | PPM1L    | -0.260795082 | 3.31E-08    |
| CTC-255N20.1 | FZD8     | -0.34761586  | 8.81E-14    |
| CTC-255N20.1 | RCAN2    | -0.268626194 | 1.23E-08    |
| CTC-255N20.1 | COPZ2    | -0.421458114 | 0           |
| CTC-255N20.1 | GAS1     | -0.325430263 | 3.64E-12    |
| CTC-255N20.1 | DACT1    | -0.263625584 | 2.33E-08    |
| CTC-255N20.1 | WBSCR17  | -0.165501947 | 0.000506209 |
| CTC-255N20.1 | NCS1     | -0.433381369 | 0           |
| CTC-255N20.1 | SPIRE2   | -0.436382643 | 0           |
| CTC-255N20.1 | C15orf52 | -0.292656383 | 4.91E-10    |
| CTC-255N20.1 | SPAG5    | -0.336645892 | 5.83E-13    |
| CTC-255N20.1 | ARL4D    | -0.391032347 | 0           |
| CTC-255N20.1 | FAM189A2 | -0.130356692 | 0.006266936 |
| CTC-255N20.1 | MAP1LC3A | -0.321926602 | 6.34E-12    |
| CTC-255N20.1 | KLF6     | -0.067479866 | 0.158058918 |

|              |          |              |             |
|--------------|----------|--------------|-------------|
| CTC-255N20.1 | ADD3     | -0.209654286 | 9.89E-06    |
| CTC-255N20.1 | TSPAN7   | -0.26025681  | 3.54E-08    |
| CTC-255N20.1 | KLF9     | -0.15755382  | 0.000936991 |
| CTC-255N20.1 | KCNQ1    | -0.341087664 | 2.75E-13    |
| CTC-255N20.1 | MAN1A1   | -0.193097354 | 4.80E-05    |
| CTC-255N20.1 | MLF1     | -0.253194881 | 8.37E-08    |
| CTC-255N20.1 | RARB     | -0.322630823 | 5.67E-12    |
| CTC-255N20.1 | CDC42EP2 | -0.261077764 | 3.20E-08    |
| CTC-255N20.1 | FAM3B    | -0.273278735 | 6.77E-09    |
| CTC-255N20.1 | GADD45B  | -0.166057807 | 0.000484371 |
| CTC-255N20.1 | TMEM47   | -0.196617468 | 3.47E-05    |
| CTC-255N20.1 | SDF2L1   | -0.28661171  | 1.14E-09    |
| CTC-255N20.1 | CCDC85A  | -0.210673528 | 8.94E-06    |
| CTC-255N20.1 | CRYBG3   | -0.149037493 | 0.001757877 |
| CTC-255N20.1 | FBLN2    | -0.240214231 | 3.82E-07    |
| CTC-255N20.1 | PEBP4    | -0.122329703 | 0.010342709 |
| CTC-255N20.1 | CDADC1   | -0.314309239 | 2.06E-11    |
| CTC-255N20.1 | FAM63A   | -0.27147173  | 8.56E-09    |
| CTC-255N20.1 | GLUL     | -0.283524057 | 1.73E-09    |
| CTC-255N20.1 | FREM2    | -0.262316569 | 2.74E-08    |
| CTC-255N20.1 | ACKR3    | -0.289527881 | 7.61E-10    |
| CTC-255N20.1 | DENND6A  | -0.345489012 | 1.28E-13    |
| CTC-255N20.1 | CLDN8    | -0.320309233 | 8.17E-12    |
| CTC-255N20.1 | UTS2R    | -0.237512701 | 4.79E-07    |
| CTC-255N20.1 | SCNN1B   | -0.381414088 | 2.76E-17    |
| CTC-255N20.1 | TTC30A   | -0.354725162 | 2.42E-14    |
| CTC-255N20.1 | CORO2B   | -0.217277748 | 4.58E-06    |
| CTC-255N20.1 | TC2N     | -0.381960444 | 1.86E-17    |
| CTC-255N20.1 | ALDH2    | -0.406020135 | 0           |
| CTC-255N20.1 | GPR183   | -0.114687519 | 0.016255378 |
| CTC-255N20.1 | C4orf47  | -0.165757822 | 0.000496045 |
| CTC-255N20.1 | SLC25A42 | -0.285798983 | 1.27E-09    |
| CTC-255N20.1 | LGMN     | -0.381667976 | 2.33E-17    |
| CTC-255N20.1 | ACSF2    | -0.423125693 | 0           |
| CTC-255N20.1 | KIAA1467 | -0.391266946 | 0           |
| CTC-255N20.1 | PRKG1    | -0.234105873 | 7.59E-07    |
| CTC-255N20.1 | GNAI1    | -0.265139554 | 1.92E-08    |
| CTC-255N20.1 | ABCC4    | -0.315650451 | 1.68E-11    |
| CTC-255N20.1 | PRPS1    | -0.42276954  | 0           |
| CTC-255N20.1 | TSPAN5   | -0.360298227 | 8.35E-15    |
| CTC-255N20.1 | CR2      | -0.101097692 | 0.034207202 |
| CTC-255N20.1 | CCDC170  | -0.314490081 | 2.01E-11    |
| CTC-255N20.1 | RRAD     | -0.177732138 | 0.000185868 |
| CTC-255N20.1 | SCGB2A1  | -0.299665406 | 1.81E-10    |
| CTC-255N20.1 | SESN3    | -0.180634409 | 0.00014511  |
| CTC-255N20.1 | SGK223   | -0.227900073 | 1.50E-06    |
| CTC-255N20.1 | NDRG2    | -0.397621533 | 0           |
| CTC-255N20.1 | C3orf52  | -0.250474871 | 1.16E-07    |
| CTC-255N20.1 | FLRT3    | 0.342816091  | 2.04E-13    |
| CTC-255N20.1 | MST1R    | 0.444327082  | 0           |
| CTC-255N20.1 | SDC1     | 0.016728697  | 0.726588608 |

|              |          |             |             |
|--------------|----------|-------------|-------------|
| CTC-255N20.1 | ST8SIA4  | 0.271599384 | 8.42E-09    |
| CTC-255N20.1 | UBTD1    | 0.342685459 | 2.09E-13    |
| CTC-255N20.1 | EPHA2    | 0.310721185 | 3.55E-11    |
| CTC-255N20.1 | TMEM130  | 0.465621374 | 0           |
| CTC-255N20.1 | SPINK2   | 0.337380892 | 5.15E-13    |
| CTC-255N20.1 | MMP16    | 0.42048653  | 0           |
| CTC-255N20.1 | SIGLEC15 | 0.401713251 | 0           |
| CTC-255N20.1 | RIN1     | 0.395868143 | 0           |
| CTC-255N20.1 | IL1RN    | 0.137646837 | 0.003883966 |
| CTC-255N20.1 | FCER1G   | 0.163742741 | 0.000581505 |
| CTC-255N20.1 | CD276    | 0.373949341 | 4.14E-16    |
| CTC-255N20.1 | CTSB     | 0.347931022 | 8.33E-14    |
| CTC-255N20.1 | FAM171A2 | 0.418138558 | 0           |
| CTC-255N20.1 | ASPHD1   | 0.306329766 | 6.84E-11    |
| CTC-255N20.1 | C15orf48 | 0.121429605 | 0.010922098 |
| CTC-255N20.1 | DYSF     | 0.376424116 | 2.08E-16    |
| CTC-255N20.1 | PDZRN4   | 0.342879209 | 2.02E-13    |
| CTC-255N20.1 | EFHD2    | 0.500964067 | 0           |
| CTC-255N20.1 | ASF1B    | 0.157924866 | 0.000911002 |
| CTC-255N20.1 | AQP1     | 0.297713585 | 2.40E-10    |
| CTC-255N20.1 | ARRDC2   | 0.408257332 | 0           |
| CTC-255N20.1 | PRSS1    | 0.477691105 | 2.09E-26    |
| CTC-255N20.1 | MAPK13   | 0.516186595 | 0           |
| CTC-255N20.1 | CST5     | 0.263443443 | 2.10E-08    |
| CTC-255N20.1 | AHR      | 0.321272733 | 7.03E-12    |
| CTC-255N20.1 | BAX      | 0.244007949 | 2.47E-07    |
| CTC-255N20.1 | C1orf115 | 0.37310612  | 5.14E-16    |
| CTC-255N20.1 | PLK3     | 0.375151695 | 3.00E-16    |
| CTC-255N20.1 | JAG2     | 0.349756466 | 6.01E-14    |
| CTC-255N20.1 | RAD23B   | 0.494909607 | 0           |
| CTC-255N20.1 | CA12     | 0.326416173 | 3.11E-12    |
| CTC-255N20.1 | ADTRP    | 0.288014053 | 9.38E-10    |
| CTC-255N20.1 | UCP2     | 0.289651563 | 7.48E-10    |
| CTC-255N20.1 | IGFBP2   | 0.22360028  | 2.37E-06    |
| CTC-255N20.1 | LOXL2    | 0.26854407  | 1.25E-08    |
| CTC-255N20.1 | GPX1     | 0.242693118 | 2.88E-07    |
| CTC-255N20.1 | P3H3     | 0.349040755 | 6.84E-14    |
| CTC-255N20.1 | C2orf81  | 0.400381258 | 0           |
| CTC-255N20.1 | CDT1     | 0.185384393 | 9.60E-05    |
| CTC-255N20.1 | SNX25    | 0.549822278 | 0           |
| CTC-255N20.1 | MTHFD1L  | 0.368187208 | 1.63E-15    |
| CTC-255N20.1 | CDC42BPG | 0.393596919 | 1.02E-17    |
| CTC-255N20.1 | MSN      | 0.394115036 | 0           |
| CTC-255N20.1 | SIGLEC6  | 0.284194602 | 1.34E-09    |
| CTC-255N20.1 | F2R      | 0.260398506 | 3.48E-08    |
| CTC-255N20.1 | TMEM184A | 0.341870037 | 2.40E-13    |
| CTC-255N20.1 | CKS2     | 0.161706811 | 0.000681574 |
| CTC-255N20.1 | TAX1BP3  | 0.286916801 | 1.09E-09    |
| CTC-255N20.1 | PMEPA1   | 0.337094949 | 5.40E-13    |
| CTC-255N20.1 | CXCL16   | 0.248316961 | 1.50E-07    |
| CTC-255N20.1 | FAXC     | 0.469051422 | 0           |

|              |          |             |             |
|--------------|----------|-------------|-------------|
| CTC-255N20.1 | VTCN1    | 0.148498426 | 0.001809546 |
| CTC-255N20.1 | SH2D4A   | 0.406481106 | 0           |
| CTC-255N20.1 | RNF24    | 0.49429446  | 0           |
| CTC-255N20.1 | LY6G6C   | 0.221633007 | 2.75E-06    |
| CTC-255N20.1 | NID1     | 0.338154614 | 4.52E-13    |
| CTC-255N20.1 | STAC     | 0.351605738 | 4.30E-14    |
| CTC-255N20.1 | RAB34    | 0.438709623 | 0           |
| CTC-255N20.1 | HES4     | 0.234912643 | 6.94E-07    |
| CTC-255N20.1 | EPHA10   | 0.402965814 | 0           |
| CTC-255N20.1 | ENTPD2   | 0.426551627 | 0           |
| CTC-255N20.1 | DDB2     | 0.331699322 | 1.32E-12    |
| CTC-255N20.1 | NKAIN4   | 0.321017001 | 7.31E-12    |
| CTC-255N20.1 | TRIM29   | 0.184407277 | 0.000104588 |
| CTC-255N20.1 | ADCY8    | 0.464007263 | 8.01E-25    |
| CTC-255N20.1 | SFTA2    | 0.199513073 | 2.64E-05    |
| CTC-255N20.1 | NRIP1    | 0.408899713 | 0           |
| CTC-255N20.1 | VWA1     | 0.304441488 | 9.04E-11    |
| CTC-255N20.1 | APLNR    | 0.218709027 | 3.95E-06    |
| CTC-255N20.1 | REN      | 0.472321812 | 8.91E-26    |
| CTC-255N20.1 | EDIL3    | 0.314977008 | 1.86E-11    |
| CTC-255N20.1 | AGRN     | 0.432386098 | 0           |
| CTC-255N20.1 | TREM1    | 0.4149007   | 0           |
| CTC-255N20.1 | SRL      | 0.401852535 | 0           |
| CTC-255N20.1 | RASGRF1  | 0.435842101 | 0           |
| CTC-255N20.1 | RMI2     | 0.234208705 | 7.50E-07    |
| CTC-255N20.1 | SAMD1    | 0.287400891 | 1.02E-09    |
| CTC-255N20.1 | MGAT4B   | 0.363860041 | 4.09E-15    |
| CTC-255N20.1 | NXN      | 0.270550782 | 9.64E-09    |
| CTC-255N20.1 | SH3BGRL3 | 0.223369511 | 2.43E-06    |
| CTC-255N20.1 | CA11     | 0.491204821 | 0           |
| CTC-255N20.1 | PLD3     | 0.461444554 | 0           |
| CTC-255N20.1 | LURAP1L  | 0.262837962 | 2.57E-08    |
| CTC-255N20.1 | CARNS1   | 0.456638403 | 0           |
| CTC-255N20.1 | PDLIM7   | 0.391985209 | 0           |
| CTC-255N20.1 | BCL2L1   | 0.296617326 | 2.81E-10    |
| CTC-255N20.1 | GGT6     | 0.14701447  | 0.002031878 |
| CTC-255N20.1 | DPYSL3   | 0.583009188 | 0           |
| CTC-255N20.1 | FYN      | 0.324561369 | 4.18E-12    |
| CTC-255N20.1 | TK1      | 0.106820948 | 0.025250535 |
| CTC-255N20.1 | AK1      | 0.368062533 | 1.68E-15    |
| CTC-255N20.1 | HIGD1B   | 0.317983104 | 1.17E-11    |
| CTC-255N20.1 | TMEM59L  | 0.290101045 | 7.02E-10    |
| CTC-255N20.1 | MEGF9    | 0.435337303 | 0           |
| CTC-255N20.1 | ZFP36L1  | 0.430547321 | 0           |
| CTC-255N20.1 | ADRA1B   | 0.428551389 | 0           |
| CTC-255N20.1 | EPHA4    | 0.460099938 | 0           |
| CTC-255N20.1 | TCERG1L  | 0.353102971 | 3.27E-14    |
| CTC-255N20.1 | NGFR     | 0.275108718 | 5.33E-09    |
| CTC-255N20.1 | EBI3     | 0.205866951 | 1.44E-05    |
| CTC-255N20.1 | S100A10  | 0.188861246 | 7.05E-05    |
| CTC-255N20.1 | S100B    | 0.220164134 | 3.40E-06    |

|              |          |             |             |
|--------------|----------|-------------|-------------|
| CTC-255N20.1 | CD44     | 0.544236732 | 0           |
| CTC-255N20.1 | BHLHE41  | 0.401921184 | 0           |
| CTC-255N20.1 | FBXO2    | 0.421959083 | 0           |
| CTC-255N20.1 | SLC30A2  | 0.051376813 | 0.28265503  |
| CTC-255N20.1 | FRMD5    | 0.244840107 | 2.25E-07    |
| CTC-255N20.1 | SAMD11   | 0.261191375 | 3.15E-08    |
| CTC-255N20.1 | SIPA1L2  | 0.472196944 | 0           |
| CTC-255N20.1 | S100A16  | 0.281094529 | 2.41E-09    |
| CTC-255N20.1 | PPL      | 0.313679482 | 2.27E-11    |
| CTC-255N20.1 | ARHGDIB  | 0.316779333 | 1.41E-11    |
| CTC-255N20.1 | CDC42EP3 | 0.30320793  | 1.08E-10    |
| CTC-255N20.1 | RUNX2    | 0.465713001 | 0           |
| CTC-255N20.1 | LAMC2    | 0.274913267 | 5.47E-09    |
| CTC-255N20.1 | BRINP1   | 0.346146569 | 1.14E-13    |
| CTC-255N20.1 | GPRC5B   | 0.41860662  | 0           |
| CTC-255N20.1 | AQP5     | 0.300533166 | 1.60E-10    |
| CTC-255N20.1 | PLAG1    | 0.598401354 | 0           |
| CTC-255N20.1 | PTPRU    | 0.271152597 | 8.92E-09    |
| CTC-255N20.1 | ANGPTL4  | 0.243585416 | 2.60E-07    |
| CTC-255N20.1 | PALM3    | 0.232278727 | 9.29E-07    |
| CTC-255N20.1 | ACP5     | 0.178065881 | 0.000180687 |
| CTC-255N20.1 | DLG4     | 0.584028572 | 0           |
| CTC-255N20.1 | ETNK2    | 0.402049972 | 0           |
| CTC-255N20.1 | CD109    | 0.397297435 | 0           |
| CTC-255N20.1 | SNX22    | 0.393612365 | 0           |
| CTC-255N20.1 | TMEM98   | 0.413419495 | 0           |
| CTC-255N20.1 | CTHRC1   | 0.121969862 | 0.010570981 |
| CTC-255N20.1 | S100A2   | 0.119225881 | 0.012463709 |
| CTC-255N20.1 | C11orf80 | 0.369684157 | 1.17E-15    |
| CTC-255N20.1 | SREBF1   | 0.421986316 | 0           |
| CTC-255N20.1 | PRSS22   | 0.330922197 | 1.50E-12    |
| CTC-255N20.1 | CMTM3    | 0.324729446 | 4.07E-12    |
| CTC-255N20.1 | RDH5     | 0.493522156 | 0           |
| CTC-255N20.1 | MYH10    | 0.494365945 | 0           |
| CTC-255N20.1 | EVPL     | 0.363526724 | 4.38E-15    |
| CTC-255N20.1 | SCD      | 0.226042716 | 1.83E-06    |
| CTC-255N20.1 | CD151    | 0.378060916 | 1.23E-16    |
| CTC-255N20.1 | S100A4   | 0.153242964 | 0.001293478 |
| CTC-255N20.1 | BNIP1    | 0.413618492 | 0           |
| CTC-255N20.1 | MAP3K6   | 0.390433227 | 0           |
| CTC-255N20.1 | MANEAL   | 0.324913976 | 3.95E-12    |
| CTC-255N20.1 | CD207    | 0.308873266 | 3.70E-11    |
| CTC-255N20.1 | CD1A     | 0.301524077 | 1.12E-10    |
| CTC-255N20.1 | C3       | 0.231122754 | 1.05E-06    |
| CTC-255N20.1 | NT5E     | 0.415155014 | 0           |
| CTC-255N20.1 | CACNG4   | 0.324217785 | 3.34E-12    |
| CTC-255N20.1 | FHOD1    | 0.443418615 | 0           |
| CTC-255N20.1 | LEMD1    | 0.32896995  | 2.06E-12    |
| CTC-255N20.1 | ATP11A   | 0.55990321  | 0           |
| CTC-255N20.1 | PPAP2C   | 0.326450214 | 3.09E-12    |
| CTC-255N20.1 | DRAM1    | 0.365123384 | 3.15E-15    |

|              |          |             |             |
|--------------|----------|-------------|-------------|
| CTC-255N20.1 | CDA      | 0.266626574 | 1.59E-08    |
| CTC-255N20.1 | CCND2    | 0.537118352 | 0           |
| CTC-255N20.1 | LCN6     | 0.339791285 | 2.52E-13    |
| CTC-255N20.1 | CDH4     | 0.405712916 | 0           |
| CTC-255N20.1 | MMP11    | 0.291608915 | 5.69E-10    |
| CTC-255N20.1 | B3GAT1   | 0.39297197  | 0           |
| CTC-255N20.1 | SPP1     | 0.134856191 | 0.004676963 |
| CTC-255N20.1 | HLA-DQB1 | 0.10204288  | 0.032593562 |
| CTC-255N20.1 | SDC3     | 0.46662629  | 0           |
| CTC-255N20.1 | CX3CL1   | 0.28270665  | 1.94E-09    |
| CTC-255N20.1 | SDK1     | 0.42761342  | 0           |
| CTC-255N20.1 | DOCK9    | 0.496785829 | 0           |
| CTC-255N20.1 | CSF2     | 0.364728077 | 2.93E-15    |
| CTC-255N20.1 | GRHL3    | 0.406505786 | 0           |
| CTC-255N20.1 | TMEM92   | 0.396400297 | 5.71E-18    |
| CTC-255N20.1 | BASP1    | 0.265510174 | 1.83E-08    |
| CTC-255N20.1 | HRH1     | 0.380314708 | 5.04E-17    |
| CTC-255N20.1 | ESM1     | 0.221498679 | 2.95E-06    |
| CTC-255N20.1 | B4GALNT3 | 0.39736651  | 0           |
| CTC-255N20.1 | LMO3     | 0.558838297 | 0           |
| CTC-255N20.1 | C9orf16  | 0.221209048 | 3.05E-06    |
| CTC-255N20.1 | SEMA3F   | 0.424863482 | 0           |
| CTC-255N20.1 | PLA2G12B | 0.423876464 | 1.43E-20    |
| CTC-255N20.1 | KLK6     | 0.324197868 | 3.35E-12    |
| CTC-255N20.1 | ST3GAL5  | 0.544699688 | 0           |
| CTC-255N20.1 | FAM132B  | 0.410853661 | 0           |
| CTC-255N20.1 | CDKN1A   | 0.232707642 | 8.86E-07    |
| CTC-255N20.1 | E2F1     | 0.190793919 | 5.92E-05    |
| CTC-255N20.1 | B3GNT8   | 0.367630214 | 1.84E-15    |
| CTC-255N20.1 | MTMR11   | 0.531569825 | 0           |
| CTC-255N20.1 | MYO1G    | 0.226688216 | 1.70E-06    |
| CTC-255N20.1 | TMSB10   | 0.257812815 | 4.78E-08    |
| CTC-255N20.1 | UNC5CL   | 0.450609332 | 0           |
| CTC-255N20.1 | ABR      | 0.467106693 | 0           |
| CTC-255N20.1 | PLP2     | 0.328034676 | 2.40E-12    |
| CTC-255N20.1 | SRCIN1   | 0.409039706 | 0           |
| CTC-255N20.1 | PDE9A    | 0.278253957 | 3.52E-09    |
| CTC-255N20.1 | TREM2    | 0.162893563 | 0.000621459 |
| CTC-255N20.1 | KDEL3    | 0.395521918 | 0           |
| CTC-255N20.1 | PC       | 0.372886272 | 5.44E-16    |
| CTC-255N20.1 | C2CD4A   | 0.304746863 | 8.64E-11    |
| CTC-255N20.1 | PELI1    | 0.347036739 | 9.77E-14    |
| CTC-255N20.1 | SSX1     | 0.175374379 | 0.000226641 |
| CTC-255N20.1 | MROH6    | 0.332725798 | 1.12E-12    |
| CTC-255N20.1 | ESPN     | 0.376934304 | 1.78E-16    |
| CTC-255N20.1 | BMP1     | 0.500616566 | 0           |
| CTC-255N20.1 | TM4SF4   | 0.401042787 | 2.16E-18    |
| CTC-255N20.1 | CORO2A   | 0.432237169 | 0           |
| CTC-255N20.1 | CD164L2  | 0.396253244 | 5.89E-18    |
| CTC-255N20.1 | CTSS     | 0.25987541  | 3.71E-08    |
| CTC-255N20.1 | CLU      | 0.410602184 | 0           |



|              |          |             |             |
|--------------|----------|-------------|-------------|
| CTC-255N20.1 | TMSB4X   | 0.265607049 | 1.81E-08    |
| CTC-255N20.1 | WNT10A   | 0.286352654 | 9.90E-10    |
| CTC-255N20.1 | NAPSA    | 0.354269581 | 2.64E-14    |
| CTC-255N20.1 | PLEKHA4  | 0.436173149 | 0           |
| CTC-255N20.1 | SFTPA1   | 0.321372004 | 5.27E-12    |
| CTC-255N20.1 | C1orf116 | 0.294269922 | 3.91E-10    |
| CTC-255N20.1 | TM4SF1   | 0.259574857 | 3.85E-08    |
| CTC-255N20.1 | SEL1L3   | 0.334253667 | 8.68E-13    |
| CTC-255N20.1 | VASN     | 0.394871169 | 0           |
| CTC-255N20.1 | NPTXR    | 0.405496189 | 0           |
| CTC-255N20.1 | PDE4C    | 0.324348471 | 4.32E-12    |
| CTC-255N20.1 | CDC42EP1 | 0.365820655 | 2.72E-15    |
| CTC-255N20.1 | ENDOD1   | 0.445923033 | 0           |
| CTC-255N20.1 | RYR1     | 0.492089318 | 0           |
| CTC-255N20.1 | IL1RAP   | 0.52002797  | 0           |
| CTC-255N20.1 | SLC35F2  | 0.446786057 | 6.28E-23    |
| CTC-255N20.1 | ISYNA1   | 0.478006451 | 0           |
| CTC-255N20.1 | HLA-G    | 0.160258938 | 0.000762209 |
| CTC-255N20.1 | CDKN2B   | 0.319505584 | 9.26E-12    |
| CTC-255N20.1 | ALDH1A3  | 0.320659429 | 7.73E-12    |
| CTC-255N20.1 | CLIP3    | 0.458534908 | 0           |
| CTC-255N20.1 | ULBP2    | 0.42382495  | 0           |
| CTC-255N20.1 | ETHE1    | 0.261082302 | 3.19E-08    |
| CTC-255N20.1 | XPR1     | 0.489372286 | 0           |
| CTC-255N20.1 | SPTBN2   | 0.326019596 | 3.31E-12    |
| CTC-255N20.1 | IVL      | 0.278561946 | 2.89E-09    |
| CTC-255N20.1 | MARCO    | 0.175939175 | 0.000216174 |
| CTC-255N20.1 | PLXND1   | 0.42923703  | 0           |
| CTC-255N20.1 | EMILIN2  | 0.390938735 | 0           |
| CTC-255N20.1 | PLAUR    | 0.230685754 | 1.11E-06    |
| CTC-255N20.1 | CDC42EP5 | 0.327453286 | 2.63E-12    |
| CTC-255N20.1 | TRPC5    | 0.519951727 | 8.98E-32    |
| CTC-255N20.1 | TMEM100  | 0.469280914 | 0           |
| CTC-255N20.1 | QSOX1    | 0.380579944 | 4.43E-17    |
| CTC-255N20.1 | ARHGAP23 | 0.413577076 | 0           |
| CTC-255N20.1 | MDF1     | 0.376481134 | 2.04E-16    |
| CTC-255N20.1 | FSTL3    | 0.322025179 | 6.24E-12    |
| CTC-255N20.1 | INF2     | 0.339354272 | 3.69E-13    |
| CTC-255N20.1 | TGFBR1   | 0.394361832 | 0           |
| CTC-255N20.1 | TGFBI    | 0.312180973 | 2.85E-11    |
| CTC-255N20.1 | ERBB3    | 0.321955821 | 6.31E-12    |
| CTC-255N20.1 | CCL18    | 0.181049425 | 0.00014002  |
| CTC-255N20.1 | CCL17    | 0.247755011 | 1.45E-07    |
| CTC-255N20.1 | C16orf45 | 0.536927297 | 0           |
| CTC-255N20.1 | PRDM1    | 0.476182567 | 0           |
| CTC-255N20.1 | TRIM47   | 0.262421529 | 2.70E-08    |
| CTC-255N20.1 | CNFN     | 0.275160063 | 5.29E-09    |
| CTC-255N20.1 | ARMCX3   | 0.429049805 | 0           |
| CTC-255N20.1 | RAMP1    | 0.344413319 | 1.55E-13    |
| CTC-255N20.1 | GABRD    | 0.35356848  | 3.00E-14    |
| CTC-255N20.1 | COL13A1  | 0.52616966  | 0           |

|              |           |             |             |
|--------------|-----------|-------------|-------------|
| CTC-255N20.1 | S100A5    | 0.326616447 | 3.01E-12    |
| CTC-255N20.1 | MISP      | 0.210483608 | 9.11E-06    |
| CTC-255N20.1 | HES6      | 0.415825336 | 0           |
| CTC-255N20.1 | PSD3      | 0.528740458 | 0           |
| CTC-255N20.1 | DOK7      | 0.310247165 | 3.82E-11    |
| CTC-255N20.1 | ZMAT3     | 0.399259043 | 0           |
| CTC-255N20.1 | MFAP2     | 0.361579016 | 6.48E-15    |
| CTC-255N20.1 | TMEM79    | 0.381190836 | 3.17E-17    |
| CTC-255N20.1 | SLC1A5    | 0.265680946 | 1.80E-08    |
| CTC-255N20.1 | BBC3      | 0.354799201 | 2.39E-14    |
| CTC-255N20.1 | HLA-DQB2  | 0.176440994 | 0.000207256 |
| CTC-255N20.1 | C1QL1     | 0.416768979 | 0           |
| CTC-255N20.1 | TMEM215   | 0.634396884 | 8.20E-51    |
| CTC-255N20.1 | PNP       | 0.257557792 | 4.93E-08    |
| CTC-255N20.1 | ARNTL     | 0.48913329  | 0           |
| CTC-255N20.1 | CLDN2     | 0.466458372 | 4.22E-25    |
| CTC-255N20.1 | MVP       | 0.373996006 | 4.09E-16    |
| CTC-255N20.1 | LGALS1    | 0.327373006 | 2.67E-12    |
| CTC-255N20.1 | BIRC7     | 0.354764703 | 1.82E-14    |
| CTC-255N20.1 | COL8A1    | 0.549272376 | 0           |
| CTC-255N20.1 | PERP      | 0.302295492 | 1.24E-10    |
| CTC-255N20.1 | GJA4      | 0.401014703 | 0           |
| CTC-255N20.1 | IGFL2     | 0.302129491 | 1.02E-10    |
| CTC-255N20.1 | DAPK2     | 0.455836882 | 0           |
| CTC-255N20.1 | MAMLD1    | 0.525527705 | 0           |
| CTC-255N20.1 | ETV5      | 0.601354828 | 0           |
| CTC-255N20.1 | RUNX1     | 0.328588976 | 2.19E-12    |
| CTC-255N20.1 | LONRF2    | 0.478979595 | 0           |
| CTC-255N20.1 | SPOCK1    | 0.399876176 | 0           |
| CTC-255N20.1 | XKRX      | 0.522108154 | 0           |
| CTC-255N20.1 | TGFB1     | 0.431868818 | 0           |
| CTC-255N20.1 | ERP27     | 0.336034716 | 6.45E-13    |
| CTC-255N20.1 | TNFRSF10C | 0.452231949 | 0           |
| CTC-255N20.1 | PALM      | 0.33881671  | 4.04E-13    |
| CTC-255N20.1 | TSC22D1   | 0.534594502 | 0           |
| CTC-255N20.1 | TGM2      | 0.248698219 | 1.43E-07    |
| CTC-255N20.1 | UBE2QL1   | 0.456498268 | 0           |
| CTC-255N20.1 | ECE1      | 0.547061702 | 0           |
| CTC-255N20.1 | COL8A2    | 0.420778431 | 0           |
| CTC-255N20.1 | HIST3H2A  | 0.200515011 | 2.40E-05    |
| CTC-255N20.1 | TNFRSF21  | 0.341128655 | 2.73E-13    |
| CTC-255N20.1 | SOX4      | 0.318902493 | 1.02E-11    |
| CTC-255N20.1 | ELF3      | 0.249542433 | 1.29E-07    |
| CTC-255N20.1 | TPD52L1   | 0.390543293 | 0           |
| CTC-255N20.1 | INHBB     | 0.465359117 | 0           |
| CTC-255N20.1 | HPN       | 0.441354743 | 0           |
| CTC-255N20.1 | MMP7      | 0.154179112 | 0.001192793 |
| CTC-255N20.1 | RAB27A    | 0.549904402 | 0           |
| CTC-255N20.1 | IGF2BP2   | 0.522968112 | 0           |
| CTC-255N20.1 | ITGB4     | 0.378389837 | 1.10E-16    |
| CTC-255N20.1 | PPP1R1B   | 0.429082002 | 0           |

|              |            |             |             |
|--------------|------------|-------------|-------------|
| CTC-255N20.1 | NPDC1      | 0.416397649 | 0           |
| CTC-255N20.1 | CCL13      | 0.28897957  | 6.84E-10    |
| CTC-255N20.1 | SPINT1     | 0.296994755 | 2.66E-10    |
| CTC-255N20.1 | HEY2       | 0.521334574 | 0           |
| CTC-255N20.1 | CST2       | 0.240170913 | 3.53E-07    |
| CTC-255N20.1 | ADM        | 0.404768706 | 0           |
| CTC-255N20.1 | VSTM2L     | 0.177888159 | 0.000183429 |
| CTC-255N20.1 | FAM84A     | 0.374053875 | 4.03E-16    |
| CTC-255N20.1 | P4HA2      | 0.479853454 | 0           |
| CTC-255N20.1 | LPL        | 0.50884085  | 0           |
| CTC-255N20.1 | TMEM173    | 0.392037263 | 0           |
| CTC-255N20.1 | DHRS3      | 0.426301994 | 0           |
| CTC-255N20.1 | SCN1B      | 0.446690089 | 0           |
| CTC-255N20.1 | GLT1D1     | 0.57890428  | 0           |
| CTC-255N20.1 | PHYHIP     | 0.438318578 | 0           |
| CTC-255N20.1 | BHLHE40    | 0.366406726 | 2.40E-15    |
| CTC-255N20.1 | BID        | 0.353473591 | 3.05E-14    |
| CTC-255N20.1 | POSTN      | 0.172808687 | 0.000280442 |
| CTC-255N20.1 | ITGA3      | 0.399571794 | 0           |
| CTC-255N20.1 | RSP04      | 0.44042259  | 0           |
| CTC-255N20.1 | ADAMTS9    | 0.573458869 | 0           |
| CTC-255N20.1 | ABTB2      | 0.448691411 | 0           |
| CTC-255N20.1 | KCNQ3      | 0.456144243 | 0           |
| CTC-255N20.1 | ANXA1      | 0.472834785 | 0           |
| CTC-255N20.1 | S100A11    | 0.313035825 | 2.50E-11    |
| CTC-255N20.1 | CEACAM6    | 0.227059378 | 1.53E-06    |
| CTC-255N20.1 | IER5L      | 0.339570999 | 3.56E-13    |
| CTC-255N20.1 | KRT80      | 0.233503916 | 8.11E-07    |
| CTC-255N20.1 | CDH6       | 0.378397779 | 1.10E-16    |
| CTC-255N20.1 | UNC5B      | 0.387728535 | 0           |
| CTC-255N20.1 | PLEKHN1    | 0.483307188 | 0           |
| CTC-255N20.1 | SYTL1      | 0.361472355 | 6.62E-15    |
| CTC-255N20.1 | TMEM163    | 0.400304808 | 0           |
| CTC-255N20.1 | C4orf48    | 0.341959395 | 2.37E-13    |
| CTC-255N20.1 | B3GNT7     | 0.526036475 | 0           |
| CTC-255N20.1 | BAIAP3     | 0.438601259 | 0           |
| CTC-255N20.1 | PHLDA2     | 0.353433168 | 3.08E-14    |
| CTC-255N20.1 | GAP43      | 0.498167232 | 6.50E-29    |
| CTC-255N20.1 | S100A1     | 0.250876979 | 1.10E-07    |
| CTC-255N20.1 | PTPRE      | 0.469917905 | 0           |
| CTC-255N20.1 | CCND1      | 0.453989595 | 0           |
| CTC-255N20.1 | ST6GALNAC5 | 0.286558156 | 9.62E-10    |
| CTC-255N20.1 | KRT17      | 0.204351138 | 1.66E-05    |
| CTC-255N20.1 | HPCAL4     | 0.542224063 | 0           |
| CTC-255N20.1 | GABBR2     | 0.479316033 | 0           |
| CTC-255N20.1 | DIRAS3     | 0.57326129  | 0           |
| CTC-255N20.1 | SERINC2    | 0.304623607 | 8.80E-11    |
| CTC-255N20.1 | PTCHD4     | 0.498082646 | 0           |
| CTC-255N20.1 | EPS8       | 0.576160724 | 0           |
| CTC-255N20.1 | LY6E       | 0.265492586 | 1.84E-08    |
| CTC-255N20.1 | UPP1       | 0.400764644 | 0           |

|              |         |             |          |
|--------------|---------|-------------|----------|
| CTC-255N20.1 | AHNAK2  | 0.386622064 | 0        |
| CTC-255N20.1 | PLXNC1  | 0.49175827  | 0        |
| CTC-255N20.1 | TNC     | 0.223007543 | 2.52E-06 |
| CTC-255N20.1 | DUSP4   | 0.432442265 | 0        |
| CTC-255N20.1 | NRCAM   | 0.524405348 | 0        |
| CTC-255N20.1 | NRP2    | 0.498338804 | 0        |
| CTC-255N20.1 | CTSC    | 0.36100642  | 7.26E-15 |
| CTC-255N20.1 | AMIGO2  | 0.624587041 | 0        |
| CTC-255N20.1 | NAB2    | 0.429394469 | 0        |
| CTC-255N20.1 | TBC1D2  | 0.392180661 | 0        |
| CTC-255N20.1 | PHLDA3  | 0.288651611 | 8.59E-10 |
| CTC-255N20.1 | PTP4A3  | 0.378422175 | 1.09E-16 |
| CTC-255N20.1 | CRABP2  | 0.271707606 | 8.30E-09 |
| CTC-255N20.1 | GOS2    | 0.382591336 | 9.82E-18 |
| CTC-255N20.1 | S100A6  | 0.281830947 | 2.18E-09 |
| CTC-255N20.1 | FOXQ1   | 0.361872761 | 6.11E-15 |
| CTC-255N20.1 | LRG1    | 0.410391556 | 0        |
| CTC-255N20.1 | LAMP5   | 0.305370947 | 7.88E-11 |
| CTC-255N20.1 | ALDH3B1 | 0.32444719  | 4.26E-12 |
| CTC-255N20.1 | CDH2    | 0.337227992 | 5.29E-13 |
| CTC-255N20.1 | SCG5    | 0.489695958 | 0        |
| CTC-255N20.1 | ZCCHC16 | 0.5412956   | 8.78E-35 |
| CTC-255N20.1 | GRB7    | 0.385538428 | 0        |
| CTC-255N20.1 | TIAM1   | 0.622342752 | 0        |
| CTC-255N20.1 | FXD5    | 0.403441536 | 0        |
| CTC-255N20.1 | CLDN9   | 0.332218446 | 1.21E-12 |
| CTC-255N20.1 | FAM43A  | 0.28971539  | 7.41E-10 |
| CTC-255N20.1 | CHST2   | 0.467440152 | 0        |
| CTC-255N20.1 | HMGA2   | 0.521213871 | 0        |
| CTC-255N20.1 | GALNT7  | 0.586539089 | 0        |
| CTC-255N20.1 | CBLN1   | 0.28234766  | 2.03E-09 |
| CTC-255N20.1 | STRA6   | 0.398819631 | 0        |
| CTC-255N20.1 | MUC21   | 0.305737214 | 5.95E-11 |
| CTC-255N20.1 | PRR36   | 0.495536953 | 0        |
| CTC-255N20.1 | NFE2L3  | 0.331760596 | 1.31E-12 |
| CTC-255N20.1 | NR1D1   | 0.268076859 | 1.32E-08 |
| CTC-255N20.1 | MUC1    | 0.198386886 | 2.94E-05 |
| CTC-255N20.1 | NAT8L   | 0.512423798 | 0        |
| CTC-255N20.1 | APOC1   | 0.29599608  | 3.06E-10 |
| CTC-255N20.1 | EVA1A   | 0.352336909 | 3.76E-14 |
| CTC-255N20.1 | ENTPD1  | 0.48960575  | 0        |
| CTC-255N20.1 | COL1A1  | 0.269064329 | 1.17E-08 |
| CTC-255N20.1 | FNDC4   | 0.383010039 | 4.83E-18 |
| CTC-255N20.1 | FRMD3   | 0.612649745 | 0        |
| CTC-255N20.1 | SHROOM4 | 0.593373369 | 0        |
| CTC-255N20.1 | NELL2   | 0.483773549 | 0        |
| CTC-255N20.1 | EPHB3   | 0.309876403 | 4.03E-11 |
| CTC-255N20.1 | TMC6    | 0.367438733 | 1.92E-15 |
| CTC-255N20.1 | NOD1    | 0.583344208 | 0        |
| CTC-255N20.1 | GGCT    | 0.46105507  | 0        |
| CTC-255N20.1 | ICAM1   | 0.418986177 | 0        |

|              |           |             |          |
|--------------|-----------|-------------|----------|
| CTC-255N20.1 | PRSS23    | 0.444385235 | 0        |
| CTC-255N20.1 | CFI       | 0.472834502 | 0        |
| CTC-255N20.1 | CD55      | 0.362407345 | 5.49E-15 |
| CTC-255N20.1 | RASD2     | 0.452904966 | 0        |
| CTC-255N20.1 | KLK11     | 0.358937987 | 8.55E-15 |
| CTC-255N20.1 | ICAM5     | 0.511295342 | 0        |
| CTC-255N20.1 | ADORA1    | 0.369124326 | 1.32E-15 |
| CTC-255N20.1 | ITGA2     | 0.436793828 | 0        |
| CTC-255N20.1 | ABCC3     | 0.546436626 | 0        |
| CTC-255N20.1 | MFGE8     | 0.468418828 | 0        |
| CTC-255N20.1 | STK32A    | 0.83990687  | 0        |
| CTC-255N20.1 | CYSLTR2   | 0.542882896 | 0        |
| CTC-255N20.1 | LAD1      | 0.286568449 | 1.14E-09 |
| CTC-255N20.1 | MGAT3     | 0.293759875 | 4.21E-10 |
| CTC-255N20.1 | IGFBP6    | 0.496829231 | 0        |
| CTC-255N20.1 | CYP2S1    | 0.31964345  | 9.06E-12 |
| CTC-255N20.1 | KCNJ2     | 0.506767901 | 0        |
| CTC-255N20.1 | FAM20A    | 0.433945597 | 0        |
| CTC-255N20.1 | TGFA      | 0.51857031  | 0        |
| CTC-255N20.1 | MXRA8     | 0.384642301 | 0        |
| CTC-255N20.1 | C8orf4    | 0.382200149 | 1.51E-17 |
| CTC-255N20.1 | CLDN10    | 0.442570565 | 1.76E-22 |
| CTC-255N20.1 | PDE5A     | 0.442405756 | 0        |
| CTC-255N20.1 | APOE      | 0.348994091 | 6.89E-14 |
| CTC-255N20.1 | SPOCK2    | 0.237712507 | 5.07E-07 |
| CTC-255N20.1 | TENM1     | 0.655122164 | 0        |
| CTC-255N20.1 | SLIT1     | 0.616724442 | 0        |
| CTC-255N20.1 | CXCL14    | 0.338912733 | 3.98E-13 |
| CTC-255N20.1 | ECM1      | 0.506728612 | 0        |
| CTC-255N20.1 | DUSP5     | 0.314143006 | 2.12E-11 |
| CTC-255N20.1 | SEZ6L2    | 0.334137644 | 8.85E-13 |
| CTC-255N20.1 | THRSP     | 0.377066212 | 1.71E-16 |
| CTC-255N20.1 | C19orf33  | 0.21836805  | 4.09E-06 |
| CTC-255N20.1 | MPZL2     | 0.490090123 | 0        |
| CTC-255N20.1 | CTSH      | 0.351906007 | 4.07E-14 |
| CTC-255N20.1 | CYP1B1    | 0.41201474  | 0        |
| CTC-255N20.1 | ALOX5     | 0.247755286 | 1.60E-07 |
| CTC-255N20.1 | SYTL5     | 0.49746553  | 7.98E-29 |
| CTC-255N20.1 | TNFRSF12A | 0.383785463 | 0        |
| CTC-255N20.1 | DUSP6     | 0.498773818 | 0        |
| CTC-255N20.1 | ALOX15B   | 0.345324906 | 1.32E-13 |
| CTC-255N20.1 | SDC4      | 0.495557519 | 0        |
| CTC-255N20.1 | MDK       | 0.401508722 | 0        |
| CTC-255N20.1 | KRT19     | 0.234421886 | 7.33E-07 |
| CTC-255N20.1 | MET       | 0.448673397 | 0        |
| CTC-255N20.1 | TESC      | 0.489023224 | 0        |
| CTC-255N20.1 | CXCL17    | 0.293504153 | 3.59E-10 |
| CTC-255N20.1 | NPC2      | 0.51436101  | 0        |
| CTC-255N20.1 | COMP      | 0.327782632 | 2.50E-12 |
| CTC-255N20.1 | TUSC3     | 0.539360655 | 0        |
| CTC-255N20.1 | TMPRSS4   | 0.334916898 | 7.78E-13 |

|              |          |             |          |
|--------------|----------|-------------|----------|
| CTC-255N20.1 | LGALS3   | 0.337302456 | 5.22E-13 |
| CTC-255N20.1 | CRLF1    | 0.310318935 | 3.77E-11 |
| CTC-255N20.1 | CTXN1    | 0.364546958 | 3.55E-15 |
| CTC-255N20.1 | PCSK1N   | 0.415226074 | 0        |
| CTC-255N20.1 | NMU      | 0.188934603 | 6.80E-05 |
| CTC-255N20.1 | GALE     | 0.428077086 | 0        |
| CTC-255N20.1 | PCSK2    | 0.499502294 | 0        |
| CTC-255N20.1 | GJB3     | 0.405629658 | 0        |
| CTC-255N20.1 | SLPI     | 0.235575306 | 6.44E-07 |
| CTC-255N20.1 | AGR2     | 0.431146583 | 0        |
| CTC-255N20.1 | MRC2     | 0.525986406 | 0        |
| CTC-255N20.1 | GOLT1A   | 0.534341464 | 0        |
| CTC-255N20.1 | SLC27A6  | 0.424908317 | 1.13E-20 |
| CTC-255N20.1 | KCNN4    | 0.341776283 | 2.44E-13 |
| CTC-255N20.1 | ETV4     | 0.474634573 | 4.79E-26 |
| CTC-255N20.1 | SYT12    | 0.390805833 | 0        |
| CTC-255N20.1 | PVRL4    | 0.355743695 | 2.00E-14 |
| CTC-255N20.1 | PLCD3    | 0.412697544 | 0        |
| CTC-255N20.1 | PLAU     | 0.395811408 | 0        |
| CTC-255N20.1 | LRRK2    | 0.608980276 | 0        |
| CTC-255N20.1 | SFN      | 0.26063126  | 3.38E-08 |
| CTC-255N20.1 | LPAR5    | 0.513461195 | 0        |
| CTC-255N20.1 | NGEF     | 0.353274027 | 3.17E-14 |
| CTC-255N20.1 | DTX4     | 0.434384157 | 0        |
| CTC-255N20.1 | CST6     | 0.336242082 | 6.23E-13 |
| CTC-255N20.1 | QPCT     | 0.515211465 | 0        |
| CTC-255N20.1 | TIMP1    | 0.486897228 | 0        |
| CTC-255N20.1 | CAMK2N1  | 0.488245531 | 0        |
| CTC-255N20.1 | KLHDC8A  | 0.682993019 | 0        |
| CTC-255N20.1 | PDLIM4   | 0.40312992  | 0        |
| CTC-255N20.1 | SCEL     | 0.427780079 | 0        |
| CTC-255N20.1 | LCN2     | 0.231077083 | 1.06E-06 |
| CTC-255N20.1 | PROS1    | 0.420573334 | 0        |
| CTC-255N20.1 | GABRB2   | 0.56658842  | 0        |
| CTC-255N20.1 | TMPRSS6  | 0.351443335 | 4.43E-14 |
| CTC-255N20.1 | KLK7     | 0.344163518 | 1.19E-13 |
| CTC-255N20.1 | PDZK1IP1 | 0.315255718 | 1.78E-11 |
| CTC-255N20.1 | CDH3     | 0.487937036 | 0        |
| CTC-255N20.1 | LRP4     | 0.635163269 | 0        |
| CTC-255N20.1 | IGSF1    | 0.494010927 | 0        |
| CTC-255N20.1 | B3GNT3   | 0.295658224 | 3.22E-10 |
| CTC-255N20.1 | CLDN1    | 0.494338855 | 0        |
| CTC-255N20.1 | GDF15    | 0.284701305 | 1.48E-09 |
| CTC-255N20.1 | ARHGAP36 | 0.551063996 | 3.11E-36 |
| CTC-255N20.1 | LAMB3    | 0.365226074 | 3.08E-15 |
| CTC-255N20.1 | KLK10    | 0.407423046 | 0        |
| CTC-255N20.1 | DPP4     | 0.443704701 | 0        |
| CTC-255N20.1 | METTL7B  | 0.476985223 | 0        |
| CTC-255N20.1 | LIPH     | 0.456793289 | 0        |
| CTC-255N20.1 | CLDN16   | 0.451224338 | 0        |
| CTC-255N20.1 | CHI3L1   | 0.374389178 | 3.69E-16 |

|              |           |              |             |
|--------------|-----------|--------------|-------------|
| CTC-255N20.1 | SLC22A31  | 0.443526356  | 1.39E-22    |
| CTC-255N20.1 | TACSTD2   | 0.294862517  | 3.60E-10    |
| CTC-255N20.1 | SFTPB     | 0.30241421   | 1.22E-10    |
| CTC-255N20.1 | RXRG      | 0.559109773  | 0           |
| CTC-255N20.1 | DCSTAMP   | 0.350655297  | 3.80E-14    |
| CTC-255N20.1 | CITED1    | 0.493155791  | 0           |
| CTC-255N20.1 | SERPINA1  | 0.44276971   | 0           |
| CTC-255N20.1 | PRR15     | 0.550561959  | 0           |
| CTC-255N20.1 | SLC34A2   | 0.312057858  | 2.90E-11    |
| CTC-255N20.1 | FN1       | 0.317963247  | 1.18E-11    |
| CTC-255N20.1 | ZCCHC12   | 0.622448279  | 0           |
| RP5-875H18.9 | TFF3      | -0.53453999  | 8.31E-34    |
| RP5-875H18.9 | CCL21     | -0.25043443  | 1.05E-07    |
| RP5-875H18.9 | TPO       | -0.578397339 | 1.48E-40    |
| RP5-875H18.9 | MT1G      | -0.507581129 | 4.00E-30    |
| RP5-875H18.9 | DIO1      | -0.567641254 | 8.29E-39    |
| RP5-875H18.9 | DPT       | -0.182809463 | 0.000117219 |
| RP5-875H18.9 | CDH16     | -0.502844758 | 1.65E-29    |
| RP5-875H18.9 | CRABP1    | -0.515929609 | 3.14E-31    |
| RP5-875H18.9 | SLC26A7   | -0.707723108 | 6.16E-68    |
| RP5-875H18.9 | MT1H      | -0.460200467 | 2.15E-24    |
| RP5-875H18.9 | SLC26A4   | -0.664879612 | 2.43E-57    |
| RP5-875H18.9 | SLC5A8    | -0.562866136 | 4.73E-38    |
| RP5-875H18.9 | PKHD1L1   | -0.528127929 | 6.69E-33    |
| RP5-875H18.9 | TFCP2L1   | -0.591281265 | 9.68E-43    |
| RP5-875H18.9 | WSCD2     | -0.582224128 | 3.39E-41    |
| RP5-875H18.9 | IPCEF1    | -0.523777948 | 2.69E-32    |
| RP5-875H18.9 | SLC5A5    | -0.328184384 | 1.75E-12    |
| RP5-875H18.9 | MT1F      | -0.489655456 | 7.51E-28    |
| RP5-875H18.9 | FOSB      | -0.32923854  | 1.47E-12    |
| RP5-875H18.9 | SEMA3D    | -0.531184565 | 2.49E-33    |
| RP5-875H18.9 | BMP8A     | -0.550478098 | 3.81E-36    |
| RP5-875H18.9 | MATN2     | -0.703931373 | 6.37E-67    |
| RP5-875H18.9 | PLA2R1    | -0.499597962 | 4.28E-29    |
| RP5-875H18.9 | COL23A1   | -0.573189217 | 1.06E-39    |
| RP5-875H18.9 | HGD       | -0.597641672 | 7.44E-44    |
| RP5-875H18.9 | TCEAL2    | -0.439910018 | 3.35E-22    |
| RP5-875H18.9 | CHRD1     | -0.199074306 | 2.65E-05    |
| RP5-875H18.9 | TNFRSF11B | -0.473798195 | 6.00E-26    |
| RP5-875H18.9 | FAM167A   | -0.656431787 | 1.87E-55    |
| RP5-875H18.9 | KIT       | -0.612795137 | 1.30E-46    |
| RP5-875H18.9 | SLC4A4    | -0.700401328 | 5.43E-66    |
| RP5-875H18.9 | SMOC2     | -0.352201846 | 2.88E-14    |
| RP5-875H18.9 | FHL1      | -0.662041165 | 1.06E-56    |
| RP5-875H18.9 | OTOS      | -0.468573337 | 2.42E-25    |
| RP5-875H18.9 | IGFBPL1   | -0.632209907 | 2.26E-50    |
| RP5-875H18.9 | HBB       | -0.383456389 | 7.95E-17    |
| RP5-875H18.9 | BEX1      | -0.53822095  | 2.46E-34    |
| RP5-875H18.9 | FABP4     | -0.557732442 | 2.98E-37    |
| RP5-875H18.9 | LMOD1     | -0.57611617  | 3.51E-40    |
| RP5-875H18.9 | SOD3      | -0.478996246 | 1.46E-26    |

|              |            |              |             |
|--------------|------------|--------------|-------------|
| RP5-875H18.9 | TMEM171    | -0.449337088 | 3.34E-23    |
| RP5-875H18.9 | PI16       | -0.229190812 | 1.22E-06    |
| RP5-875H18.9 | ZMAT4      | -0.572918518 | 1.17E-39    |
| RP5-875H18.9 | MFAP4      | -0.211532076 | 7.82E-06    |
| RP5-875H18.9 | CWH43      | -0.477530517 | 2.18E-26    |
| RP5-875H18.9 | SPX        | -0.758521829 | 2.66E-83    |
| RP5-875H18.9 | APOD       | -0.010077819 | 0.833232906 |
| RP5-875H18.9 | DPP6       | -0.530010843 | 3.64E-33    |
| RP5-875H18.9 | MMRN1      | -0.441439733 | 2.31E-22    |
| RP5-875H18.9 | WDR72      | -0.651035589 | 2.78E-54    |
| RP5-875H18.9 | MPPED2     | -0.695023995 | 1.33E-64    |
| RP5-875H18.9 | PAPSS2     | -0.391716422 | 1.50E-17    |
| RP5-875H18.9 | DCN        | -0.003952436 | 0.934187929 |
| RP5-875H18.9 | SORBS2     | -0.638169676 | 1.40E-51    |
| RP5-875H18.9 | EGR2       | -0.373704086 | 5.36E-16    |
| RP5-875H18.9 | EDN3       | -0.649392315 | 6.26E-54    |
| RP5-875H18.9 | DIO2       | -0.673031991 | 3.22E-59    |
| RP5-875H18.9 | ITPR1      | -0.688862728 | 4.80E-63    |
| RP5-875H18.9 | CFD        | -0.148610669 | 0.001794952 |
| RP5-875H18.9 | CPXM1      | -0.343070507 | 1.43E-13    |
| RP5-875H18.9 | ELMO1      | -0.627637268 | 1.84E-49    |
| RP5-875H18.9 | GPC3       | -0.441555346 | 2.25E-22    |
| RP5-875H18.9 | MYOC       | -0.293812622 | 3.44E-10    |
| RP5-875H18.9 | DEPTOR     | -0.624145377 | 8.87E-49    |
| RP5-875H18.9 | DGKI       | -0.517788304 | 1.76E-31    |
| RP5-875H18.9 | CARTPT     | -0.470898805 | 1.30E-25    |
| RP5-875H18.9 | IYD        | -0.546744516 | 1.38E-35    |
| RP5-875H18.9 | LYVE1      | -0.32501179  | 2.94E-12    |
| RP5-875H18.9 | CLCNKB     | -0.638560437 | 1.16E-51    |
| RP5-875H18.9 | NCAM1      | -0.364105535 | 3.30E-15    |
| RP5-875H18.9 | HBA2       | -0.287960785 | 7.90E-10    |
| RP5-875H18.9 | GLT8D2     | -0.432016493 | 2.18E-21    |
| RP5-875H18.9 | OGDHL      | -0.501115053 | 2.74E-29    |
| RP5-875H18.9 | LIFR       | -0.683710207 | 8.98E-62    |
| RP5-875H18.9 | CSGALNACT1 | -0.452153976 | 1.66E-23    |
| RP5-875H18.9 | RAP1GAP    | -0.542063037 | 6.78E-35    |
| RP5-875H18.9 | COL9A3     | -0.545555495 | 2.07E-35    |
| RP5-875H18.9 | FBLN1      | -0.014095359 | 0.768373442 |
| RP5-875H18.9 | EFEMP1     | -0.333593936 | 7.17E-13    |
| RP5-875H18.9 | AOX1       | -0.401489305 | 1.96E-18    |
| RP5-875H18.9 | GRIN2C     | -0.547819359 | 9.55E-36    |
| RP5-875H18.9 | C11orf74   | -0.56866617  | 5.68E-39    |
| RP5-875H18.9 | PPARGC1A   | -0.540680691 | 1.08E-34    |
| RP5-875H18.9 | ANGPTL1    | -0.659028968 | 4.99E-56    |
| RP5-875H18.9 | SCARA5     | -0.164191592 | 0.000552633 |
| RP5-875H18.9 | LTF        | -0.408504844 | 4.37E-19    |
| RP5-875H18.9 | CA4        | -0.675298151 | 9.43E-60    |
| RP5-875H18.9 | TG         | -0.705625619 | 2.25E-67    |
| RP5-875H18.9 | FCGBP      | -0.585732877 | 8.67E-42    |
| RP5-875H18.9 | PBX4       | -0.586047188 | 7.66E-42    |
| RP5-875H18.9 | CYR61      | -0.369351669 | 1.23E-15    |



|              |          |              |             |
|--------------|----------|--------------|-------------|
| RP5-875H18.9 | FOS      | -0.366761012 | 2.01E-15    |
| RP5-875H18.9 | KHDRBS2  | -0.622808987 | 1.61E-48    |
| RP5-875H18.9 | MUM1L1   | -0.46314778  | 1.00E-24    |
| RP5-875H18.9 | RGS16    | -0.541744612 | 7.55E-35    |
| RP5-875H18.9 | MT1M     | -0.416839342 | 7.00E-20    |
| RP5-875H18.9 | LRP2     | -0.588178009 | 3.32E-42    |
| RP5-875H18.9 | MAFB     | -0.418927469 | 4.39E-20    |
| RP5-875H18.9 | KCNK2    | -0.526663201 | 1.07E-32    |
| RP5-875H18.9 | TBC1D4   | -0.629278892 | 8.69E-50    |
| RP5-875H18.9 | MIOX     | -0.596447991 | 1.21E-43    |
| RP5-875H18.9 | TPPP     | -0.58958319  | 1.90E-42    |
| RP5-875H18.9 | FMOD     | -0.488973928 | 9.11E-28    |
| RP5-875H18.9 | CITED2   | -0.458783873 | 3.09E-24    |
| RP5-875H18.9 | RGS8     | -0.559980804 | 1.34E-37    |
| RP5-875H18.9 | ABI3BP   | -0.428727997 | 4.70E-21    |
| RP5-875H18.9 | ADH1B    | -0.254239913 | 6.64E-08    |
| RP5-875H18.9 | OGN      | -0.12693354  | 0.007750524 |
| RP5-875H18.9 | NR4A1    | -0.318465576 | 8.36E-12    |
| RP5-875H18.9 | FOXJ1    | -0.58441948  | 1.45E-41    |
| RP5-875H18.9 | ALDH1A1  | -0.606569617 | 1.84E-45    |
| RP5-875H18.9 | OCA2     | -0.457866699 | 3.90E-24    |
| RP5-875H18.9 | TMEM139  | -0.257061969 | 4.69E-08    |
| RP5-875H18.9 | ARHGAP24 | -0.572198059 | 1.53E-39    |
| RP5-875H18.9 | SLC25A15 | -0.60587887  | 2.46E-45    |
| RP5-875H18.9 | DES      | -0.171298108 | 0.000311498 |
| RP5-875H18.9 | GDF10    | -0.420631087 | 2.99E-20    |
| RP5-875H18.9 | KIAA1324 | -0.505108764 | 8.40E-30    |
| RP5-875H18.9 | JUN      | -0.396870929 | 5.18E-18    |
| RP5-875H18.9 | C7       | 0.010822606  | 0.821108952 |
| RP5-875H18.9 | LGI3     | -0.661646149 | 1.30E-56    |
| RP5-875H18.9 | CDON     | -0.740778275 | 1.59E-77    |
| RP5-875H18.9 | BCL2     | -0.695021584 | 1.34E-64    |
| RP5-875H18.9 | HLF      | -0.753118682 | 1.72E-81    |
| RP5-875H18.9 | EGR1     | -0.449308579 | 3.37E-23    |
| RP5-875H18.9 | IP6K3    | -0.452965143 | 1.35E-23    |
| RP5-875H18.9 | SCUBE3   | -0.513573468 | 6.49E-31    |
| RP5-875H18.9 | PKNOX2   | -0.629449806 | 8.04E-50    |
| RP5-875H18.9 | SMAD9    | -0.53186338  | 2.00E-33    |
| RP5-875H18.9 | IQGAP2   | -0.610858775 | 2.98E-46    |
| RP5-875H18.9 | GNA14    | -0.641446967 | 2.95E-52    |
| RP5-875H18.9 | LAYN     | -0.50235386  | 1.90E-29    |
| RP5-875H18.9 | AVPR1A   | -0.627940516 | 1.60E-49    |
| RP5-875H18.9 | PDLIM3   | -0.379455161 | 1.75E-16    |
| RP5-875H18.9 | GPM6A    | -0.578775051 | 1.28E-40    |
| RP5-875H18.9 | SDPR     | -0.659429091 | 4.07E-56    |
| RP5-875H18.9 | CRYAB    | -0.211513212 | 7.83E-06    |
| RP5-875H18.9 | FOXA2    | -0.381744321 | 1.12E-16    |
| RP5-875H18.9 | C8orf88  | -0.572507122 | 1.36E-39    |
| RP5-875H18.9 | ISM1     | -0.464656077 | 6.77E-25    |
| RP5-875H18.9 | BMP2     | -0.277841549 | 3.18E-09    |
| RP5-875H18.9 | ID4      | -0.618394161 | 1.14E-47    |

|              |          |              |             |
|--------------|----------|--------------|-------------|
| RP5-875H18.9 | NUPR1    | -0.273958755 | 5.36E-09    |
| RP5-875H18.9 | SERTM1   | -0.430789037 | 2.91E-21    |
| RP5-875H18.9 | IRS1     | -0.713170225 | 2.01E-69    |
| RP5-875H18.9 | FIBIN    | -0.117950991 | 0.01340068  |
| RP5-875H18.9 | PODN     | -0.0700049   | 0.143089968 |
| RP5-875H18.9 | TDRD9    | -0.374263492 | 4.81E-16    |
| RP5-875H18.9 | EPHA3    | -0.330943991 | 1.11E-12    |
| RP5-875H18.9 | AIF1L    | -0.467648417 | 3.09E-25    |
| RP5-875H18.9 | EBF4     | -0.607348587 | 1.32E-45    |
| RP5-875H18.9 | ADM2     | -0.46694462  | 3.71E-25    |
| RP5-875H18.9 | GSTM3    | -0.609426644 | 5.49E-46    |
| RP5-875H18.9 | HSD17B6  | -0.505374851 | 7.76E-30    |
| RP5-875H18.9 | AGR3     | -0.294591722 | 3.07E-10    |
| RP5-875H18.9 | EPHB1    | -0.523524911 | 2.91E-32    |
| RP5-875H18.9 | TMOD1    | -0.318182469 | 8.74E-12    |
| RP5-875H18.9 | WASF3    | -0.691541466 | 1.02E-63    |
| RP5-875H18.9 | SELV     | -0.561461469 | 7.86E-38    |
| RP5-875H18.9 | ENPP1    | -0.337148377 | 3.94E-13    |
| RP5-875H18.9 | SYNE1    | -0.654251772 | 5.60E-55    |
| RP5-875H18.9 | PLCH1    | -0.532966873 | 1.39E-33    |
| RP5-875H18.9 | CCDC146  | -0.687535982 | 1.03E-62    |
| RP5-875H18.9 | SLC16A2  | -0.625703034 | 4.40E-49    |
| RP5-875H18.9 | IER2     | -0.449995355 | 2.84E-23    |
| RP5-875H18.9 | KCNAB1   | -0.649204045 | 6.86E-54    |
| RP5-875H18.9 | SYNDIG1  | -0.452971384 | 1.35E-23    |
| RP5-875H18.9 | C16orf89 | -0.684414429 | 6.04E-62    |
| RP5-875H18.9 | CTGF     | -0.251292882 | 9.50E-08    |
| RP5-875H18.9 | NR4A3    | -0.130476353 | 0.006187026 |
| RP5-875H18.9 | KIAA1456 | -0.626324565 | 3.33E-49    |
| RP5-875H18.9 | AQP4     | -0.554297349 | 1.00E-36    |
| RP5-875H18.9 | RNF150   | -0.642713431 | 1.61E-52    |
| RP5-875H18.9 | C1S      | 0.089549646  | 0.060835127 |
| RP5-875H18.9 | PFKFB2   | -0.578472796 | 1.43E-40    |
| RP5-875H18.9 | PROX1    | -0.605326981 | 3.10E-45    |
| RP5-875H18.9 | TCF7L1   | -0.662129956 | 1.01E-56    |
| RP5-875H18.9 | HSPB6    | -0.275803774 | 4.19E-09    |
| RP5-875H18.9 | FHDC1    | -0.555963653 | 5.59E-37    |
| RP5-875H18.9 | PRR15L   | -0.548012116 | 8.94E-36    |
| RP5-875H18.9 | SLC1A1   | -0.37400393  | 5.06E-16    |
| RP5-875H18.9 | BTBD11   | -0.774154561 | 8.02E-89    |
| RP5-875H18.9 | TRIM58   | -0.596808946 | 1.04E-43    |
| RP5-875H18.9 | LRIG1    | -0.565383063 | 1.90E-38    |
| RP5-875H18.9 | ROR2     | -0.265022017 | 1.72E-08    |
| RP5-875H18.9 | GPR125   | -0.627715562 | 1.77E-49    |
| RP5-875H18.9 | FLRT1    | -0.688751953 | 5.12E-63    |
| RP5-875H18.9 | PGF      | -0.505108906 | 8.40E-30    |
| RP5-875H18.9 | DUSP1    | -0.321832367 | 4.90E-12    |
| RP5-875H18.9 | PLA2G7   | -0.404050162 | 1.14E-18    |
| RP5-875H18.9 | PLSCR4   | -0.488040781 | 1.19E-27    |
| RP5-875H18.9 | FAM46B   | -0.256856447 | 4.81E-08    |
| RP5-875H18.9 | GLDC     | -0.461191419 | 1.66E-24    |

|              |          |              |             |
|--------------|----------|--------------|-------------|
| RP5-875H18.9 | ZBTB16   | -0.532413141 | 1.67E-33    |
| RP5-875H18.9 | OMD      | -0.022321339 | 0.640922991 |
| RP5-875H18.9 | HSD11B2  | -0.643337657 | 1.19E-52    |
| RP5-875H18.9 | FGL2     | -0.076771246 | 0.108203293 |
| RP5-875H18.9 | CLCNKA   | -0.607090536 | 1.48E-45    |
| RP5-875H18.9 | GATM     | -0.625807001 | 4.20E-49    |
| RP5-875H18.9 | TNS3     | -0.502104084 | 2.05E-29    |
| RP5-875H18.9 | TOB1     | -0.345849098 | 8.85E-14    |
| RP5-875H18.9 | MARC2    | -0.688593946 | 5.61E-63    |
| RP5-875H18.9 | LRRC2    | -0.622164762 | 2.15E-48    |
| RP5-875H18.9 | SORD     | -0.457494006 | 4.29E-24    |
| RP5-875H18.9 | RIMS4    | -0.565199951 | 2.03E-38    |
| RP5-875H18.9 | SLC29A4  | -0.555068944 | 7.66E-37    |
| RP5-875H18.9 | SLC39A14 | -0.653599439 | 7.76E-55    |
| RP5-875H18.9 | FAXDC2   | -0.768377105 | 9.89E-87    |
| RP5-875H18.9 | HSPB8    | -0.168491284 | 0.00039172  |
| RP5-875H18.9 | CCL19    | 0.210333539  | 8.82E-06    |
| RP5-875H18.9 | KCNIP3   | -0.649369143 | 6.33E-54    |
| RP5-875H18.9 | CGNL1    | -0.604249018 | 4.87E-45    |
| RP5-875H18.9 | ATF3     | -0.033015169 | 0.490219046 |
| RP5-875H18.9 | SGCD     | -0.267870392 | 1.19E-08    |
| RP5-875H18.9 | STARD13  | -0.630626062 | 4.69E-50    |
| RP5-875H18.9 | LDHD     | -0.675813419 | 7.12E-60    |
| RP5-875H18.9 | RCAN1    | -0.344009895 | 1.22E-13    |
| RP5-875H18.9 | ID3      | -0.349650619 | 4.54E-14    |
| RP5-875H18.9 | SYTL3    | -0.703464871 | 8.48E-67    |
| RP5-875H18.9 | MT1E     | -0.27164     | 7.28E-09    |
| RP5-875H18.9 | CAMK1D   | -0.640883022 | 3.86E-52    |
| RP5-875H18.9 | PRKCQ    | -0.756739928 | 1.06E-82    |
| RP5-875H18.9 | NUAK2    | -0.345860729 | 8.83E-14    |
| RP5-875H18.9 | LIPG     | -0.715257786 | 5.31E-70    |
| RP5-875H18.9 | SLC25A25 | -0.321581882 | 5.10E-12    |
| RP5-875H18.9 | PRKX     | -0.31856387  | 8.23E-12    |
| RP5-875H18.9 | SRPX     | -0.110460567 | 0.020618667 |
| RP5-875H18.9 | FAM189A1 | -0.64782411  | 1.35E-53    |
| RP5-875H18.9 | PLEKHH1  | -0.633601524 | 1.19E-50    |
| RP5-875H18.9 | WNT11    | -0.392194555 | 1.36E-17    |
| RP5-875H18.9 | SNAI1    | -0.295666518 | 2.63E-10    |
| RP5-875H18.9 | FDCSP    | 0.087984849  | 0.065503739 |
| RP5-875H18.9 | MT1X     | -0.317349885 | 9.97E-12    |
| RP5-875H18.9 | ACACB    | -0.746657286 | 2.19E-79    |
| RP5-875H18.9 | ARC      | -0.229526115 | 1.17E-06    |
| RP5-875H18.9 | KLK4     | -0.128568085 | 0.006989942 |
| RP5-875H18.9 | ZFPM2    | -0.370999109 | 9.00E-16    |
| RP5-875H18.9 | AKAP12   | -0.44364204  | 1.36E-22    |
| RP5-875H18.9 | GJB6     | -0.368567078 | 1.43E-15    |
| RP5-875H18.9 | ERO1LB   | -0.673548846 | 2.43E-59    |
| RP5-875H18.9 | DNALI1   | -0.531620838 | 2.16E-33    |
| RP5-875H18.9 | HKDC1    | -0.257122392 | 4.65E-08    |
| RP5-875H18.9 | ZFP36L2  | -0.489088533 | 8.82E-28    |
| RP5-875H18.9 | CAPSL    | -0.576588211 | 2.94E-40    |

|              |          |              |             |
|--------------|----------|--------------|-------------|
| RP5-875H18.9 | CYP7B1   | -0.533183175 | 1.30E-33    |
| RP5-875H18.9 | CPQ      | -0.574155696 | 7.36E-40    |
| RP5-875H18.9 | RPS6KA6  | -0.722724336 | 4.08E-72    |
| RP5-875H18.9 | TLE1     | -0.428485597 | 4.97E-21    |
| RP5-875H18.9 | TP53INP2 | -0.637755227 | 1.70E-51    |
| RP5-875H18.9 | KATNAL2  | -0.687220962 | 1.23E-62    |
| RP5-875H18.9 | SGPP2    | -0.1732234   | 0.00026564  |
| RP5-875H18.9 | CTH      | -0.537914865 | 2.72E-34    |
| RP5-875H18.9 | KIF12    | -0.411584556 | 2.23E-19    |
| RP5-875H18.9 | TMEM220  | -0.669589459 | 2.03E-58    |
| RP5-875H18.9 | CENPJ    | -0.459624826 | 2.49E-24    |
| RP5-875H18.9 | FAM155B  | -0.618264522 | 1.21E-47    |
| RP5-875H18.9 | WFS1     | -0.511296555 | 1.30E-30    |
| RP5-875H18.9 | SELENBP1 | -0.645025662 | 5.28E-53    |
| RP5-875H18.9 | SNTA1    | -0.485403743 | 2.49E-27    |
| RP5-875H18.9 | FRAS1    | -0.210256818 | 8.89E-06    |
| RP5-875H18.9 | FBLN7    | -0.515582167 | 3.50E-31    |
| RP5-875H18.9 | AGPAT9   | -0.651154591 | 2.62E-54    |
| RP5-875H18.9 | GPR83    | -0.580238811 | 7.29E-41    |
| RP5-875H18.9 | PRTG     | -0.615180697 | 4.63E-47    |
| RP5-875H18.9 | EGR3     | -0.174282215 | 0.00024319  |
| RP5-875H18.9 | GRAMD2   | -0.372124445 | 7.26E-16    |
| RP5-875H18.9 | HYOU1    | -0.605607819 | 2.76E-45    |
| RP5-875H18.9 | FBLN5    | -0.244743973 | 2.07E-07    |
| RP5-875H18.9 | ITM2A    | -0.600971869 | 1.90E-44    |
| RP5-875H18.9 | SRF      | -0.430751163 | 2.93E-21    |
| RP5-875H18.9 | FGFR2    | -0.617213366 | 1.91E-47    |
| RP5-875H18.9 | MT1A     | -0.156328535 | 0.001015002 |
| RP5-875H18.9 | MAMDC2   | -0.226106703 | 1.70E-06    |
| RP5-875H18.9 | FHL2     | -0.224138427 | 2.10E-06    |
| RP5-875H18.9 | FTCDNL1  | -0.542729104 | 5.42E-35    |
| RP5-875H18.9 | PKIA     | -0.527982855 | 7.01E-33    |
| RP5-875H18.9 | DNAJB4   | -0.565777655 | 1.64E-38    |
| RP5-875H18.9 | SLC25A33 | -0.497326723 | 8.31E-29    |
| RP5-875H18.9 | EYA2     | -0.293189756 | 3.76E-10    |
| RP5-875H18.9 | LPAR1    | -0.112359342 | 0.018525741 |
| RP5-875H18.9 | STX11    | -0.241166838 | 3.15E-07    |
| RP5-875H18.9 | ARHGEF28 | -0.490998229 | 5.13E-28    |
| RP5-875H18.9 | OR2W3    | -0.588252331 | 3.22E-42    |
| RP5-875H18.9 | ALDH1B1  | -0.472776346 | 7.89E-26    |
| RP5-875H18.9 | CXCL12   | -0.159282502 | 0.000810363 |
| RP5-875H18.9 | OLFM2    | -0.452009585 | 1.72E-23    |
| RP5-875H18.9 | TUB      | -0.632047697 | 2.44E-50    |
| RP5-875H18.9 | HTRA3    | -0.115181052 | 0.015758071 |
| RP5-875H18.9 | CKB      | -0.339786265 | 2.52E-13    |
| RP5-875H18.9 | RGS2     | 0.049005473  | 0.305614827 |
| RP5-875H18.9 | SHANK2   | -0.695732756 | 8.79E-65    |
| RP5-875H18.9 | CNTFR    | -0.529007377 | 5.04E-33    |
| RP5-875H18.9 | CYTH3    | -0.624611455 | 7.20E-49    |
| RP5-875H18.9 | PLAC9    | -0.275169478 | 4.56E-09    |
| RP5-875H18.9 | WWOX     | -0.746617856 | 2.25E-79    |

|              |          |              |             |
|--------------|----------|--------------|-------------|
| RP5-875H18.9 | NPR3     | -0.45856899  | 3.26E-24    |
| RP5-875H18.9 | SDC2     | -0.499346059 | 4.61E-29    |
| RP5-875H18.9 | KLF15    | -0.687046218 | 1.36E-62    |
| RP5-875H18.9 | TMEM164  | -0.60132788  | 1.64E-44    |
| RP5-875H18.9 | LONRF3   | -0.375342732 | 3.91E-16    |
| RP5-875H18.9 | GBP1     | -0.086455892 | 0.070345868 |
| RP5-875H18.9 | ARHGAP6  | -0.433347068 | 1.60E-21    |
| RP5-875H18.9 | TMEM119  | -0.031554954 | 0.509620368 |
| RP5-875H18.9 | SH3RF1   | -0.559657378 | 1.50E-37    |
| RP5-875H18.9 | CRELD2   | -0.458754797 | 3.11E-24    |
| RP5-875H18.9 | PCP4     | -0.051118564 | 0.285205782 |
| RP5-875H18.9 | GCSH     | -0.71945787  | 3.50E-71    |
| RP5-875H18.9 | IMPA2    | -0.583899914 | 1.77E-41    |
| RP5-875H18.9 | C1R      | 0.141667453  | 0.002931634 |
| RP5-875H18.9 | SUCNR1   | -0.337954721 | 3.44E-13    |
| RP5-875H18.9 | SFRP1    | -0.383530995 | 7.83E-17    |
| RP5-875H18.9 | UGT8     | -0.537864513 | 2.77E-34    |
| RP5-875H18.9 | TLE4     | -0.261998756 | 2.53E-08    |
| RP5-875H18.9 | ANTXR1   | -0.34990153  | 4.34E-14    |
| RP5-875H18.9 | GPX3     | -0.336650386 | 4.29E-13    |
| RP5-875H18.9 | DPY19L2  | -0.567931737 | 7.45E-39    |
| RP5-875H18.9 | FAM46C   | -0.516118312 | 2.96E-31    |
| RP5-875H18.9 | IL33     | -0.204017618 | 1.65E-05    |
| RP5-875H18.9 | PEG3     | -0.693998938 | 2.44E-64    |
| RP5-875H18.9 | FAHD2A   | -0.603805493 | 5.85E-45    |
| RP5-875H18.9 | PTGDS    | -0.028163201 | 0.556184029 |
| RP5-875H18.9 | CHCHD10  | -0.267523174 | 1.25E-08    |
| RP5-875H18.9 | CD36     | -0.646590836 | 2.47E-53    |
| RP5-875H18.9 | ANKRD37  | -0.414840004 | 1.09E-19    |
| RP5-875H18.9 | TSPAN33  | -0.508457683 | 3.08E-30    |
| RP5-875H18.9 | PRDM16   | -0.658282762 | 7.30E-56    |
| RP5-875H18.9 | UST      | -0.71931121  | 3.85E-71    |
| RP5-875H18.9 | NEXN     | -0.503772799 | 1.25E-29    |
| RP5-875H18.9 | NUPR1L   | -0.24159045  | 3.00E-07    |
| RP5-875H18.9 | SLC24A3  | -0.472463933 | 8.58E-26    |
| RP5-875H18.9 | MARC1    | -0.679658342 | 8.62E-61    |
| RP5-875H18.9 | MYH11    | -0.299945038 | 1.41E-10    |
| RP5-875H18.9 | APOA1    | -0.468625763 | 2.38E-25    |
| RP5-875H18.9 | TMEM178B | -0.464406301 | 7.22E-25    |
| RP5-875H18.9 | CAPNG    | -0.179145657 | 0.000161047 |
| RP5-875H18.9 | PPM1L    | -0.658075822 | 8.11E-56    |
| RP5-875H18.9 | FZD8     | -0.600614155 | 2.20E-44    |
| RP5-875H18.9 | RCAN2    | -0.626275064 | 3.40E-49    |
| RP5-875H18.9 | COPZ2    | -0.419467727 | 3.89E-20    |
| RP5-875H18.9 | GAS1     | -0.169681015 | 0.000355616 |
| RP5-875H18.9 | DACT1    | -0.446126319 | 7.39E-23    |
| RP5-875H18.9 | WBSCR17  | -0.618572167 | 1.05E-47    |
| RP5-875H18.9 | NCS1     | -0.35655015  | 1.32E-14    |
| RP5-875H18.9 | SPIRE2   | -0.44771447  | 5.00E-23    |
| RP5-875H18.9 | C15orf52 | -0.289619713 | 6.25E-10    |
| RP5-875H18.9 | SPAG5    | -0.407912674 | 4.97E-19    |

|              |          |              |             |
|--------------|----------|--------------|-------------|
| RP5-875H18.9 | ARL4D    | -0.39192549  | 1.44E-17    |
| RP5-875H18.9 | FAM189A2 | -0.522616727 | 3.88E-32    |
| RP5-875H18.9 | MAP1LC3A | -0.514013731 | 5.67E-31    |
| RP5-875H18.9 | KLF6     | -0.023210103 | 0.627687352 |
| RP5-875H18.9 | ADD3     | -0.559319096 | 1.69E-37    |
| RP5-875H18.9 | TSPAN7   | -0.598843743 | 4.55E-44    |
| RP5-875H18.9 | KLF9     | -0.510073493 | 1.89E-30    |
| RP5-875H18.9 | KCNQ1    | -0.685414665 | 3.43E-62    |
| RP5-875H18.9 | MAN1A1   | -0.103346295 | 0.030389858 |
| RP5-875H18.9 | MLF1     | -0.375883415 | 3.52E-16    |
| RP5-875H18.9 | RARB     | -0.712994489 | 2.25E-69    |
| RP5-875H18.9 | CDC42EP2 | -0.34926468  | 4.86E-14    |
| RP5-875H18.9 | FAM3B    | -0.128040724 | 0.007227695 |
| RP5-875H18.9 | GADD45B  | -0.187850932 | 7.49E-05    |
| RP5-875H18.9 | TMEM47   | -0.534924794 | 7.32E-34    |
| RP5-875H18.9 | SDF2L1   | -0.395546027 | 6.82E-18    |
| RP5-875H18.9 | CCDC85A  | -0.425192136 | 1.06E-20    |
| RP5-875H18.9 | CRYBG3   | -0.254224232 | 6.65E-08    |
| RP5-875H18.9 | FBLN2    | 0.039221541  | 0.412355788 |
| RP5-875H18.9 | PEBP4    | -0.257853421 | 4.25E-08    |
| RP5-875H18.9 | CDADC1   | -0.751386849 | 6.39E-81    |
| RP5-875H18.9 | FAM63A   | -0.709831093 | 1.66E-68    |
| RP5-875H18.9 | GLUL     | -0.433316573 | 1.61E-21    |
| RP5-875H18.9 | FREM2    | -0.513723249 | 6.20E-31    |
| RP5-875H18.9 | ACKR3    | -0.579754721 | 8.78E-41    |
| RP5-875H18.9 | DENND6A  | -0.712889388 | 2.40E-69    |
| RP5-875H18.9 | CLDN8    | -0.05436848  | 0.255647308 |
| RP5-875H18.9 | UTS2R    | -0.220834416 | 2.99E-06    |
| RP5-875H18.9 | SCNN1B   | -0.460772148 | 1.85E-24    |
| RP5-875H18.9 | TTC30A   | -0.636868177 | 2.58E-51    |
| RP5-875H18.9 | CORO2B   | -0.580611701 | 6.32E-41    |
| RP5-875H18.9 | TC2N     | -0.200476999 | 2.32E-05    |
| RP5-875H18.9 | ALDH2    | -0.531827778 | 2.02E-33    |
| RP5-875H18.9 | GPR183   | 0.083192784  | 0.081660449 |
| RP5-875H18.9 | C4orf47  | -0.479114397 | 1.42E-26    |
| RP5-875H18.9 | SLC25A42 | -0.76414525  | 3.08E-85    |
| RP5-875H18.9 | LGMN     | -0.541496397 | 8.21E-35    |
| RP5-875H18.9 | ACSF2    | -0.510631481 | 1.59E-30    |
| RP5-875H18.9 | KIAA1467 | -0.665194774 | 2.06E-57    |
| RP5-875H18.9 | PRKG1    | -0.680437313 | 5.59E-61    |
| RP5-875H18.9 | GNAI1    | -0.568145627 | 6.89E-39    |
| RP5-875H18.9 | ABCC4    | -0.320599234 | 5.96E-12    |
| RP5-875H18.9 | PRPS1    | -0.678548892 | 1.59E-60    |
| RP5-875H18.9 | TSPAN5   | -0.246303899 | 1.73E-07    |
| RP5-875H18.9 | CR2      | -0.138067076 | 0.003749858 |
| RP5-875H18.9 | CCDC170  | -0.538004506 | 2.64E-34    |
| RP5-875H18.9 | RRAD     | 0.111853692  | 0.019064158 |
| RP5-875H18.9 | SCGB2A1  | -0.343099016 | 1.43E-13    |
| RP5-875H18.9 | SESN3    | -0.325046257 | 2.92E-12    |
| RP5-875H18.9 | SGK223   | -0.233098995 | 7.88E-07    |
| RP5-875H18.9 | NDRG2    | -0.700609262 | 4.79E-66    |

|              |          |              |             |
|--------------|----------|--------------|-------------|
| RP5-875H18.9 | C3orf52  | -0.220755751 | 3.01E-06    |
| RP5-875H18.9 | FLRT3    | 0.315160769  | 1.40E-11    |
| RP5-875H18.9 | MST1R    | 0.671979275  | 5.67E-59    |
| RP5-875H18.9 | SDC1     | 0.492813746  | 3.06E-28    |
| RP5-875H18.9 | ST8SIA4  | 0.559715673  | 1.47E-37    |
| RP5-875H18.9 | UBTD1    | 0.447172368  | 5.71E-23    |
| RP5-875H18.9 | EPHA2    | 0.469208343  | 2.04E-25    |
| RP5-875H18.9 | TMEM130  | 0.223213932  | 2.32E-06    |
| RP5-875H18.9 | SPINK2   | 0.534872031  | 7.45E-34    |
| RP5-875H18.9 | MMP16    | 0.634364041  | 8.33E-51    |
| RP5-875H18.9 | SIGLEC15 | 0.500029715  | 3.77E-29    |
| RP5-875H18.9 | RIN1     | 0.651091898  | 2.70E-54    |
| RP5-875H18.9 | IL1RN    | 0.721217928  | 1.10E-71    |
| RP5-875H18.9 | FCER1G   | 0.451742222  | 1.84E-23    |
| RP5-875H18.9 | CD276    | 0.67660019   | 4.63E-60    |
| RP5-875H18.9 | CTSB     | 0.441959708  | 2.04E-22    |
| RP5-875H18.9 | FAM171A2 | 0.017861137  | 0.709003188 |
| RP5-875H18.9 | ASPHD1   | 0.666000552  | 1.35E-57    |
| RP5-875H18.9 | C15orf48 | 0.648330186  | 1.05E-53    |
| RP5-875H18.9 | DYSF     | 0.053970201  | 0.259151111 |
| RP5-875H18.9 | PDZRN4   | 0.044466823  | 0.352636814 |
| RP5-875H18.9 | EFHD2    | 0.361961807  | 4.90E-15    |
| RP5-875H18.9 | ASF1B    | 0.470768552  | 1.35E-25    |
| RP5-875H18.9 | AQP1     | 0.114647886  | 0.016251396 |
| RP5-875H18.9 | ARRDC2   | 0.462074781  | 1.32E-24    |
| RP5-875H18.9 | PRSS1    | 0.473737175  | 6.10E-26    |
| RP5-875H18.9 | MAPK13   | 0.535508171  | 6.04E-34    |
| RP5-875H18.9 | CST5     | 0.736862667  | 2.58E-76    |
| RP5-875H18.9 | AHR      | 0.543030083  | 4.89E-35    |
| RP5-875H18.9 | BAX      | 0.639505499  | 7.44E-52    |
| RP5-875H18.9 | C1orf115 | 0.057449469  | 0.229650179 |
| RP5-875H18.9 | PLK3     | 0.582547354  | 2.99E-41    |
| RP5-875H18.9 | JAG2     | 0.315385581  | 1.36E-11    |
| RP5-875H18.9 | RAD23B   | 0.427842223  | 5.76E-21    |
| RP5-875H18.9 | CA12     | -0.156509159 | 0.001001234 |
| RP5-875H18.9 | ADTRP    | 0.231389714  | 9.54E-07    |
| RP5-875H18.9 | UCP2     | 0.349411482  | 4.73E-14    |
| RP5-875H18.9 | IGFBP2   | 0.33827967   | 3.26E-13    |
| RP5-875H18.9 | LOXL2    | 0.263197848  | 2.17E-08    |
| RP5-875H18.9 | GPX1     | 0.557776474  | 2.94E-37    |
| RP5-875H18.9 | P3H3     | 0.533543725  | 1.15E-33    |
| RP5-875H18.9 | C2orf81  | 0.299757387  | 1.45E-10    |
| RP5-875H18.9 | CDT1     | 0.500981159  | 2.85E-29    |
| RP5-875H18.9 | SNX25    | 0.224240692  | 2.08E-06    |
| RP5-875H18.9 | MTHFD1L  | 0.648954837  | 7.76E-54    |
| RP5-875H18.9 | CDC42BPG | 0.597565314  | 7.67E-44    |
| RP5-875H18.9 | MSN      | 0.439455997  | 3.73E-22    |
| RP5-875H18.9 | SIGLEC6  | 0.396199735  | 5.95E-18    |
| RP5-875H18.9 | F2R      | 0.251666765  | 9.08E-08    |
| RP5-875H18.9 | TMEM184A | 0.639397986  | 7.82E-52    |
| RP5-875H18.9 | CKS2     | 0.443974506  | 1.25E-22    |

|              |          |              |             |
|--------------|----------|--------------|-------------|
| RP5-875H18.9 | TAX1BP3  | 0.75169109   | 5.08E-81    |
| RP5-875H18.9 | PMEPA1   | 0.615542382  | 3.96E-47    |
| RP5-875H18.9 | CXCL16   | 0.699245355  | 1.09E-65    |
| RP5-875H18.9 | FAXC     | 0.672345073  | 4.66E-59    |
| RP5-875H18.9 | VTCN1    | 0.719283455  | 3.92E-71    |
| RP5-875H18.9 | SH2D4A   | 0.40264342   | 1.54E-18    |
| RP5-875H18.9 | RNF24    | 0.364716428  | 2.94E-15    |
| RP5-875H18.9 | LY6G6C   | 0.604039313  | 5.31E-45    |
| RP5-875H18.9 | NID1     | 0.351878882  | 3.06E-14    |
| RP5-875H18.9 | STAC     | 0.755066107  | 3.87E-82    |
| RP5-875H18.9 | RAB34    | 0.532296125  | 1.73E-33    |
| RP5-875H18.9 | HES4     | 0.454195581  | 9.91E-24    |
| RP5-875H18.9 | EPHA10   | 0.606025246  | 2.31E-45    |
| RP5-875H18.9 | ENTPD2   | 0.427386075  | 6.40E-21    |
| RP5-875H18.9 | DDB2     | 0.60533308   | 3.09E-45    |
| RP5-875H18.9 | NKAIN4   | 0.398282351  | 3.85E-18    |
| RP5-875H18.9 | TRIM29   | 0.541754966  | 7.53E-35    |
| RP5-875H18.9 | ADCY8    | 0.617200195  | 1.92E-47    |
| RP5-875H18.9 | SFTA2    | 0.568140663  | 6.90E-39    |
| RP5-875H18.9 | NRIP1    | 0.389428304  | 2.39E-17    |
| RP5-875H18.9 | VWA1     | 0.139255369  | 0.003459391 |
| RP5-875H18.9 | APLNR    | 0.163115795  | 0.000601545 |
| RP5-875H18.9 | REN      | 0.454176187  | 9.96E-24    |
| RP5-875H18.9 | EDIL3    | 0.213117533  | 6.66E-06    |
| RP5-875H18.9 | AGRN     | 0.371874812  | 7.61E-16    |
| RP5-875H18.9 | TREM1    | 0.645399119  | 4.40E-53    |
| RP5-875H18.9 | SRL      | 0.330419193  | 1.21E-12    |
| RP5-875H18.9 | RASGRF1  | 0.415804781  | 8.81E-20    |
| RP5-875H18.9 | RMI2     | 0.496756679  | 9.80E-29    |
| RP5-875H18.9 | SAMD1    | 0.521168569  | 6.13E-32    |
| RP5-875H18.9 | MGAT4B   | 0.583772119  | 1.86E-41    |
| RP5-875H18.9 | NXN      | 0.667810537  | 5.22E-58    |
| RP5-875H18.9 | SH3BGRL3 | 0.71682991   | 1.93E-70    |
| RP5-875H18.9 | CA11     | 0.216474253  | 4.71E-06    |
| RP5-875H18.9 | PLD3     | 0.234780333  | 6.53E-07    |
| RP5-875H18.9 | LURAP1L  | 0.617334779  | 1.81E-47    |
| RP5-875H18.9 | CARNS1   | 0.16733063   | 0.000430207 |
| RP5-875H18.9 | PDLIM7   | 0.542511384  | 5.83E-35    |
| RP5-875H18.9 | BCL2L1   | 0.798035271  | 3.59E-98    |
| RP5-875H18.9 | GGT6     | 0.294657913  | 3.04E-10    |
| RP5-875H18.9 | DPYSL3   | 0.472507335  | 8.48E-26    |
| RP5-875H18.9 | FYN      | 0.457472305  | 4.32E-24    |
| RP5-875H18.9 | TK1      | 0.497094252  | 8.89E-29    |
| RP5-875H18.9 | AK1      | 0.334093061  | 6.59E-13    |
| RP5-875H18.9 | HIGD1B   | -0.014347971 | 0.764343682 |
| RP5-875H18.9 | TMEM59L  | 0.53038813   | 3.22E-33    |
| RP5-875H18.9 | MEGF9    | 0.354964409  | 1.76E-14    |
| RP5-875H18.9 | ZFP36L1  | 0.429487819  | 3.94E-21    |
| RP5-875H18.9 | ADRA1B   | 0.286119454  | 1.02E-09    |
| RP5-875H18.9 | EPHA4    | 0.579069222  | 1.14E-40    |
| RP5-875H18.9 | TCERG1L  | 0.138167903  | 0.00372438  |



|              |          |             |             |
|--------------|----------|-------------|-------------|
| RP5-875H18.9 | NGFR     | 0.199698029 | 2.50E-05    |
| RP5-875H18.9 | EBI3     | 0.676745431 | 4.28E-60    |
| RP5-875H18.9 | S100A10  | 0.774162788 | 7.97E-89    |
| RP5-875H18.9 | S100B    | 0.595850268 | 1.54E-43    |
| RP5-875H18.9 | CD44     | 0.080631062 | 0.091538011 |
| RP5-875H18.9 | BHLHE41  | 0.324755774 | 3.06E-12    |
| RP5-875H18.9 | FBXO2    | 0.477712477 | 2.08E-26    |
| RP5-875H18.9 | SLC30A2  | 0.493599524 | 2.44E-28    |
| RP5-875H18.9 | FRMD5    | 0.716244405 | 2.81E-70    |
| RP5-875H18.9 | SAMD11   | 0.303544583 | 8.26E-11    |
| RP5-875H18.9 | SIPA1L2  | 0.271416323 | 7.50E-09    |
| RP5-875H18.9 | S100A16  | 0.76835966  | 1.00E-86    |
| RP5-875H18.9 | PPL      | 0.63916438  | 8.74E-52    |
| RP5-875H18.9 | ARHGDIB  | 0.25885692  | 3.75E-08    |
| RP5-875H18.9 | CDC42EP3 | 0.733090697 | 3.62E-75    |
| RP5-875H18.9 | RUNX2    | 0.389302636 | 2.45E-17    |
| RP5-875H18.9 | LAMC2    | 0.662599437 | 7.96E-57    |
| RP5-875H18.9 | BRINP1   | 0.503327289 | 1.43E-29    |
| RP5-875H18.9 | GPRC5B   | 0.329472004 | 1.42E-12    |
| RP5-875H18.9 | AQP5     | 0.168548303 | 0.000389915 |
| RP5-875H18.9 | PLAG1    | 0.217416477 | 4.28E-06    |
| RP5-875H18.9 | PTPRU    | 0.631709983 | 2.85E-50    |
| RP5-875H18.9 | ANGPTL4  | 0.641524835 | 2.84E-52    |
| RP5-875H18.9 | PALM3    | 0.314633702 | 1.52E-11    |
| RP5-875H18.9 | ACP5     | 0.516000587 | 3.07E-31    |
| RP5-875H18.9 | DLG4     | 0.144883328 | 0.002341863 |
| RP5-875H18.9 | ETNK2    | 0.352891175 | 2.55E-14    |
| RP5-875H18.9 | CD109    | 0.505728026 | 6.98E-30    |
| RP5-875H18.9 | SNX22    | 0.335086772 | 5.58E-13    |
| RP5-875H18.9 | TMEM98   | 0.448707047 | 3.91E-23    |
| RP5-875H18.9 | CTHRC1   | 0.557702152 | 3.02E-37    |
| RP5-875H18.9 | S100A2   | 0.77172106  | 6.20E-88    |
| RP5-875H18.9 | C11orf80 | 0.702412297 | 1.61E-66    |
| RP5-875H18.9 | SREBF1   | 0.523589021 | 2.85E-32    |
| RP5-875H18.9 | PRSS22   | 0.665602698 | 1.67E-57    |
| RP5-875H18.9 | CMTM3    | 0.714741782 | 7.38E-70    |
| RP5-875H18.9 | RDH5     | 0.386455537 | 4.36E-17    |
| RP5-875H18.9 | MYH10    | 0.4497348   | 3.03E-23    |
| RP5-875H18.9 | EVPL     | 0.506457778 | 5.61E-30    |
| RP5-875H18.9 | SCD      | 0.47823529  | 1.80E-26    |
| RP5-875H18.9 | CD151    | 0.532623343 | 1.56E-33    |
| RP5-875H18.9 | S100A4   | 0.545466563 | 2.14E-35    |
| RP5-875H18.9 | BNIP1    | 0.360039771 | 6.98E-15    |
| RP5-875H18.9 | MAP3K6   | 0.645616556 | 3.96E-53    |
| RP5-875H18.9 | MANEAL   | 0.415867047 | 8.69E-20    |
| RP5-875H18.9 | CD207    | 0.53233026  | 1.71E-33    |
| RP5-875H18.9 | CD1A     | 0.585043896 | 1.13E-41    |
| RP5-875H18.9 | C3       | 0.508530871 | 3.01E-30    |
| RP5-875H18.9 | NT5E     | 0.554079345 | 1.08E-36    |
| RP5-875H18.9 | CACNG4   | 0.700833011 | 4.18E-66    |
| RP5-875H18.9 | FHOD1    | 0.451375998 | 2.01E-23    |

|              |          |              |             |
|--------------|----------|--------------|-------------|
| RP5-875H18.9 | LEMD1    | 0.583412987  | 2.14E-41    |
| RP5-875H18.9 | ATP11A   | 0.222060796  | 2.62E-06    |
| RP5-875H18.9 | PPAP2C   | 0.458968829  | 2.95E-24    |
| RP5-875H18.9 | DRAM1    | 0.668143145  | 4.38E-58    |
| RP5-875H18.9 | CDA      | 0.305381234  | 6.28E-11    |
| RP5-875H18.9 | CCND2    | 0.312824426  | 2.02E-11    |
| RP5-875H18.9 | LCN6     | 0.210620921  | 8.57E-06    |
| RP5-875H18.9 | CDH4     | 0.500380053  | 3.40E-29    |
| RP5-875H18.9 | MMP11    | 0.663998094  | 3.85E-57    |
| RP5-875H18.9 | B3GAT1   | 0.304001157  | 7.72E-11    |
| RP5-875H18.9 | SPP1     | 0.343848626  | 1.25E-13    |
| RP5-875H18.9 | HLA-DQB1 | 0.498508085  | 5.89E-29    |
| RP5-875H18.9 | SDC3     | 0.526488883  | 1.13E-32    |
| RP5-875H18.9 | CX3CL1   | 0.552154047  | 2.13E-36    |
| RP5-875H18.9 | SDK1     | 0.460835691  | 1.82E-24    |
| RP5-875H18.9 | DOCK9    | 0.363611091  | 3.61E-15    |
| RP5-875H18.9 | CSF2     | 0.718123678  | 8.35E-71    |
| RP5-875H18.9 | GRHL3    | 0.75513816   | 3.66E-82    |
| RP5-875H18.9 | TMEM92   | 0.749242816  | 3.20E-80    |
| RP5-875H18.9 | BASP1    | 0.659056626  | 4.92E-56    |
| RP5-875H18.9 | HRH1     | 0.695044845  | 1.32E-64    |
| RP5-875H18.9 | ESM1     | -0.042748181 | 0.371574108 |
| RP5-875H18.9 | B4GALNT3 | 0.563380747  | 3.93E-38    |
| RP5-875H18.9 | LMO3     | 0.296620799  | 2.29E-10    |
| RP5-875H18.9 | C9orf16  | 0.708687743  | 3.38E-68    |
| RP5-875H18.9 | SEMA3F   | 0.197623234  | 3.05E-05    |
| RP5-875H18.9 | PLA2G12B | 0.116006985  | 0.015019766 |
| RP5-875H18.9 | KLK6     | 0.480349073  | 1.01E-26    |
| RP5-875H18.9 | ST3GAL5  | 0.321657056  | 5.03E-12    |
| RP5-875H18.9 | FAM132B  | 0.160408832  | 0.000742934 |
| RP5-875H18.9 | CDKN1A   | 0.51990565   | 9.11E-32    |
| RP5-875H18.9 | E2F1     | 0.525226957  | 1.70E-32    |
| RP5-875H18.9 | B3GNT8   | 0.433642231  | 1.49E-21    |
| RP5-875H18.9 | MTMR11   | 0.603636281  | 6.28E-45    |
| RP5-875H18.9 | MYO1G    | 0.603654578  | 6.23E-45    |
| RP5-875H18.9 | TMSB10   | 0.699064513  | 1.21E-65    |
| RP5-875H18.9 | UNC5CL   | 0.718039072  | 8.82E-71    |
| RP5-875H18.9 | ABR      | 0.630537272  | 4.88E-50    |
| RP5-875H18.9 | PLP2     | 0.677412917  | 2.97E-60    |
| RP5-875H18.9 | SRCIN1   | 0.382187655  | 1.02E-16    |
| RP5-875H18.9 | PDE9A    | 0.697747128  | 2.66E-65    |
| RP5-875H18.9 | TREM2    | 0.454534855  | 9.10E-24    |
| RP5-875H18.9 | KDEL3    | 0.531320852  | 2.38E-33    |
| RP5-875H18.9 | PC       | 0.42842177   | 5.04E-21    |
| RP5-875H18.9 | C2CD4A   | 0.678243232  | 1.88E-60    |
| RP5-875H18.9 | PELI1    | 0.613516805  | 9.52E-47    |
| RP5-875H18.9 | SSX1     | 0.340575306  | 2.20E-13    |
| RP5-875H18.9 | MROH6    | 0.627170907  | 2.27E-49    |
| RP5-875H18.9 | ESPN     | 0.464840181  | 6.45E-25    |
| RP5-875H18.9 | BMP1     | 0.428792816  | 4.63E-21    |
| RP5-875H18.9 | TM4SF4   | 0.513739073  | 6.17E-31    |

|              |          |             |             |
|--------------|----------|-------------|-------------|
| RP5-875H18.9 | COR02A   | 0.442565211 | 1.76E-22    |
| RP5-875H18.9 | CD164L2  | 0.560656074 | 1.05E-37    |
| RP5-875H18.9 | CTSS     | 0.4978345   | 7.17E-29    |
| RP5-875H18.9 | CLU      | 0.508980212 | 2.63E-30    |
| RP5-875H18.9 | TMSB4X   | 0.667146171 | 7.41E-58    |
| RP5-875H18.9 | WNT10A   | 0.542129861 | 6.63E-35    |
| RP5-875H18.9 | NAPSA    | 0.576654726 | 2.86E-40    |
| RP5-875H18.9 | PLEKHA4  | 0.411108408 | 2.48E-19    |
| RP5-875H18.9 | SFTPA1   | 0.189880697 | 6.24E-05    |
| RP5-875H18.9 | C1orf116 | 0.498517304 | 5.87E-29    |
| RP5-875H18.9 | TM4SF1   | 0.637871676 | 1.61E-51    |
| RP5-875H18.9 | SEL1L3   | 0.49188145  | 3.99E-28    |
| RP5-875H18.9 | VASN     | 0.625643888 | 4.52E-49    |
| RP5-875H18.9 | NPTXR    | 0.62794236  | 1.60E-49    |
| RP5-875H18.9 | PDE4C    | 0.612160982 | 1.71E-46    |
| RP5-875H18.9 | CDC42EP1 | 0.64462795  | 6.39E-53    |
| RP5-875H18.9 | ENDOD1   | 0.574920624 | 5.52E-40    |
| RP5-875H18.9 | RYR1     | 0.497017801 | 9.09E-29    |
| RP5-875H18.9 | IL1RAP   | 0.554151824 | 1.06E-36    |
| RP5-875H18.9 | SLC35F2  | 0.54138706  | 8.52E-35    |
| RP5-875H18.9 | ISYNA1   | 0.410628147 | 2.75E-19    |
| RP5-875H18.9 | HLA-G    | 0.666914125 | 8.37E-58    |
| RP5-875H18.9 | CDKN2B   | 0.695180016 | 1.22E-64    |
| RP5-875H18.9 | ALDH1A3  | 0.675555701 | 8.19E-60    |
| RP5-875H18.9 | CLIP3    | 0.458571827 | 3.26E-24    |
| RP5-875H18.9 | ULBP2    | 0.585160563 | 1.08E-41    |
| RP5-875H18.9 | ETHE1    | 0.759266475 | 1.48E-83    |
| RP5-875H18.9 | XPR1     | 0.546722106 | 1.39E-35    |
| RP5-875H18.9 | SPTBN2   | 0.652632251 | 1.26E-54    |
| RP5-875H18.9 | IVL      | 0.736223842 | 4.05E-76    |
| RP5-875H18.9 | MARCO    | 0.60504203  | 3.49E-45    |
| RP5-875H18.9 | PLXND1   | 0.254772858 | 6.22E-08    |
| RP5-875H18.9 | EMILIN2  | 0.521868252 | 4.92E-32    |
| RP5-875H18.9 | PLAUR    | 0.725083276 | 8.48E-73    |
| RP5-875H18.9 | CDC42EP5 | 0.658839474 | 5.50E-56    |
| RP5-875H18.9 | TRPC5    | 0.104980534 | 0.027849793 |
| RP5-875H18.9 | TMEM100  | 0.49835873  | 6.15E-29    |
| RP5-875H18.9 | QSOX1    | 0.596453786 | 1.21E-43    |
| RP5-875H18.9 | ARHGAP23 | 0.446348294 | 6.99E-23    |
| RP5-875H18.9 | MDFI     | 0.481332305 | 7.70E-27    |
| RP5-875H18.9 | FSTL3    | 0.693208904 | 3.87E-64    |
| RP5-875H18.9 | INF2     | 0.442505214 | 1.79E-22    |
| RP5-875H18.9 | TGFBR1   | 0.492511916 | 3.33E-28    |
| RP5-875H18.9 | TGFBI    | 0.407181219 | 5.82E-19    |
| RP5-875H18.9 | ERBB3    | 0.609749891 | 4.78E-46    |
| RP5-875H18.9 | CCL18    | 0.469592438 | 1.85E-25    |
| RP5-875H18.9 | CCL17    | 0.690198363 | 2.23E-63    |
| RP5-875H18.9 | C16orf45 | 0.314012455 | 1.68E-11    |
| RP5-875H18.9 | PRDM1    | 0.229516044 | 1.17E-06    |
| RP5-875H18.9 | TRIM47   | 0.736108993 | 4.39E-76    |
| RP5-875H18.9 | CNFN     | 0.587100613 | 5.07E-42    |

|              |           |             |             |
|--------------|-----------|-------------|-------------|
| RP5-875H18.9 | ARMCX3    | 0.248602655 | 1.31E-07    |
| RP5-875H18.9 | RAMP1     | 0.394492744 | 8.48E-18    |
| RP5-875H18.9 | GABRD     | 0.01760271  | 0.713026335 |
| RP5-875H18.9 | COL13A1   | 0.19538022  | 3.76E-05    |
| RP5-875H18.9 | S100A5    | 0.482206874 | 6.05E-27    |
| RP5-875H18.9 | MISP      | 0.691432535 | 1.09E-63    |
| RP5-875H18.9 | HES6      | 0.306976903 | 4.93E-11    |
| RP5-875H18.9 | PSD3      | 0.400253463 | 2.55E-18    |
| RP5-875H18.9 | DOK7      | 0.579654016 | 9.13E-41    |
| RP5-875H18.9 | ZMAT3     | 0.513917849 | 5.84E-31    |
| RP5-875H18.9 | MFAP2     | 0.391037873 | 1.72E-17    |
| RP5-875H18.9 | TMEM79    | 0.548451386 | 7.68E-36    |
| RP5-875H18.9 | SLC1A5    | 0.509820314 | 2.04E-30    |
| RP5-875H18.9 | BBC3      | 0.621465647 | 2.93E-48    |
| RP5-875H18.9 | HLA-DQB2  | 0.569631088 | 3.98E-39    |
| RP5-875H18.9 | C1QL1     | 0.341723053 | 1.81E-13    |
| RP5-875H18.9 | TMEM215   | 0.16484238  | 0.000524864 |
| RP5-875H18.9 | PNP       | 0.574596101 | 6.23E-40    |
| RP5-875H18.9 | ARNTL     | 0.500374663 | 3.41E-29    |
| RP5-875H18.9 | CLDN2     | 0.354357926 | 1.96E-14    |
| RP5-875H18.9 | MVP       | 0.748410537 | 5.96E-80    |
| RP5-875H18.9 | LGALS1    | 0.717761071 | 1.06E-70    |
| RP5-875H18.9 | BIRC7     | 0.516597663 | 2.55E-31    |
| RP5-875H18.9 | COL8A1    | 0.558067241 | 2.65E-37    |
| RP5-875H18.9 | PERP      | 0.726562922 | 3.14E-73    |
| RP5-875H18.9 | GJA4      | 0.186416674 | 8.52E-05    |
| RP5-875H18.9 | IGFL2     | 0.666891013 | 8.47E-58    |
| RP5-875H18.9 | DAPK2     | 0.436470607 | 7.62E-22    |
| RP5-875H18.9 | MAMLD1    | 0.612322535 | 1.59E-46    |
| RP5-875H18.9 | ETV5      | 0.160947529 | 0.000712555 |
| RP5-875H18.9 | RUNX1     | 0.740462262 | 1.99E-77    |
| RP5-875H18.9 | LONRF2    | 0.210161077 | 8.98E-06    |
| RP5-875H18.9 | SPOCK1    | 0.067091989 | 0.160525329 |
| RP5-875H18.9 | XKRX      | 0.375371667 | 3.88E-16    |
| RP5-875H18.9 | TGFB1     | 0.328872458 | 1.57E-12    |
| RP5-875H18.9 | ERP27     | 0.346577858 | 7.79E-14    |
| RP5-875H18.9 | TNFRSF10C | 0.476431829 | 2.94E-26    |
| RP5-875H18.9 | PALM      | 0.557156078 | 3.66E-37    |
| RP5-875H18.9 | TSC22D1   | 0.279185599 | 2.65E-09    |
| RP5-875H18.9 | TGM2      | 0.67249613  | 4.29E-59    |
| RP5-875H18.9 | UBE2QL1   | 0.155434884 | 0.001085722 |
| RP5-875H18.9 | ECE1      | 0.564987905 | 2.19E-38    |
| RP5-875H18.9 | COL8A2    | 0.617405414 | 1.76E-47    |
| RP5-875H18.9 | HIST3H2A  | 0.532319386 | 1.72E-33    |
| RP5-875H18.9 | TNFRSF21  | 0.675135862 | 1.03E-59    |
| RP5-875H18.9 | SOX4      | 0.603679967 | 6.17E-45    |
| RP5-875H18.9 | ELF3      | 0.712985553 | 2.26E-69    |
| RP5-875H18.9 | TPD52L1   | 0.445029492 | 9.66E-23    |
| RP5-875H18.9 | INHBB     | 0.397293462 | 4.74E-18    |
| RP5-875H18.9 | HPN       | 0.379541965 | 1.72E-16    |
| RP5-875H18.9 | MMP7      | 0.64523204  | 4.77E-53    |

|              |            |             |             |
|--------------|------------|-------------|-------------|
| RP5-875H18.9 | RAB27A     | 0.446820896 | 6.23E-23    |
| RP5-875H18.9 | IGF2BP2    | 0.396632784 | 5.44E-18    |
| RP5-875H18.9 | ITGB4      | 0.680621701 | 5.05E-61    |
| RP5-875H18.9 | PPP1R1B    | 0.452714375 | 1.44E-23    |
| RP5-875H18.9 | NPDC1      | 0.416420071 | 7.69E-20    |
| RP5-875H18.9 | CCL13      | 0.703364274 | 9.01E-67    |
| RP5-875H18.9 | SPINT1     | 0.740064125 | 2.65E-77    |
| RP5-875H18.9 | HEY2       | 0.23262157  | 8.31E-07    |
| RP5-875H18.9 | CST2       | 0.751497361 | 5.88E-81    |
| RP5-875H18.9 | ADM        | 0.326505762 | 2.30E-12    |
| RP5-875H18.9 | VSTM2L     | 0.656515471 | 1.79E-55    |
| RP5-875H18.9 | FAM84A     | 0.628295535 | 1.36E-49    |
| RP5-875H18.9 | P4HA2      | 0.458018662 | 3.76E-24    |
| RP5-875H18.9 | LPL        | 0.348087715 | 5.98E-14    |
| RP5-875H18.9 | TMEM173    | 0.539961718 | 1.37E-34    |
| RP5-875H18.9 | DHRS3      | 0.473365308 | 6.74E-26    |
| RP5-875H18.9 | SCN1B      | 0.62174308  | 2.59E-48    |
| RP5-875H18.9 | GLT1D1     | 0.13747517  | 0.003902634 |
| RP5-875H18.9 | PHYHIP     | 0.550695534 | 3.54E-36    |
| RP5-875H18.9 | BHLHE40    | 0.596615622 | 1.13E-43    |
| RP5-875H18.9 | BID        | 0.604902178 | 3.70E-45    |
| RP5-875H18.9 | POSTN      | 0.478000691 | 1.92E-26    |
| RP5-875H18.9 | ITGA3      | 0.840680053 | 1.78E-118   |
| RP5-875H18.9 | RSP04      | 0.587942701 | 3.64E-42    |
| RP5-875H18.9 | ADAMTS9    | 0.101770909 | 0.033023658 |
| RP5-875H18.9 | ABTB2      | 0.645635562 | 3.93E-53    |
| RP5-875H18.9 | KCNQ3      | 0.679442041 | 9.71E-61    |
| RP5-875H18.9 | ANXA1      | 0.513188948 | 7.30E-31    |
| RP5-875H18.9 | S100A11    | 0.824819955 | 2.77E-110   |
| RP5-875H18.9 | CEACAM6    | 0.741194459 | 1.18E-77    |
| RP5-875H18.9 | IER5L      | 0.615361114 | 4.28E-47    |
| RP5-875H18.9 | KRT80      | 0.62986851  | 6.63E-50    |
| RP5-875H18.9 | CDH6       | 0.760788672 | 4.47E-84    |
| RP5-875H18.9 | UNC5B      | 0.394526359 | 8.42E-18    |
| RP5-875H18.9 | PLEKHN1    | 0.725237311 | 7.65E-73    |
| RP5-875H18.9 | SYTL1      | 0.59476961  | 2.39E-43    |
| RP5-875H18.9 | TMEM163    | 0.674008256 | 1.90E-59    |
| RP5-875H18.9 | C4orf48    | 0.384364573 | 6.63E-17    |
| RP5-875H18.9 | B3GNT7     | 0.334393188 | 6.27E-13    |
| RP5-875H18.9 | BAIAP3     | 0.366987526 | 1.92E-15    |
| RP5-875H18.9 | PHLDA2     | 0.732844751 | 4.29E-75    |
| RP5-875H18.9 | GAP43      | 0.605618712 | 2.74E-45    |
| RP5-875H18.9 | S100A1     | 0.534738988 | 7.78E-34    |
| RP5-875H18.9 | PTPRE      | 0.62096638  | 3.66E-48    |
| RP5-875H18.9 | CCND1      | 0.53517769  | 6.74E-34    |
| RP5-875H18.9 | ST6GALNAC5 | 0.768947127 | 6.19E-87    |
| RP5-875H18.9 | KRT17      | 0.451321817 | 2.04E-23    |
| RP5-875H18.9 | HPCAL4     | 0.278547048 | 2.89E-09    |
| RP5-875H18.9 | GABBR2     | 0.308113444 | 4.15E-11    |
| RP5-875H18.9 | DIRAS3     | 0.296872985 | 2.21E-10    |
| RP5-875H18.9 | SERINC2    | 0.553061238 | 1.55E-36    |

|              |         |              |             |
|--------------|---------|--------------|-------------|
| RP5-875H18.9 | PTCHD4  | 0.505613563  | 7.22E-30    |
| RP5-875H18.9 | EPS8    | 0.275028208  | 4.64E-09    |
| RP5-875H18.9 | LY6E    | 0.580825592  | 5.82E-41    |
| RP5-875H18.9 | UPP1    | 0.769005586  | 5.90E-87    |
| RP5-875H18.9 | AHNAK2  | 0.730373379  | 2.36E-74    |
| RP5-875H18.9 | PLXNC1  | 0.386475111  | 4.34E-17    |
| RP5-875H18.9 | TNC     | 0.620107271  | 5.35E-48    |
| RP5-875H18.9 | DUSP4   | 0.418806624  | 4.51E-20    |
| RP5-875H18.9 | NRCAM   | 0.363548115  | 3.66E-15    |
| RP5-875H18.9 | NRP2    | 0.418732585  | 4.59E-20    |
| RP5-875H18.9 | CTSC    | 0.695234198  | 1.18E-64    |
| RP5-875H18.9 | AMIGO2  | 0.415988886  | 8.46E-20    |
| RP5-875H18.9 | NAB2    | 0.419721049  | 3.67E-20    |
| RP5-875H18.9 | TBC1D2  | 0.732780074  | 4.49E-75    |
| RP5-875H18.9 | PHLDA3  | 0.707440994  | 7.34E-68    |
| RP5-875H18.9 | PTP4A3  | 0.553104923  | 1.53E-36    |
| RP5-875H18.9 | CRABP2  | 0.431047745  | 2.74E-21    |
| RP5-875H18.9 | GOS2    | 0.436781089  | 7.08E-22    |
| RP5-875H18.9 | S100A6  | 0.82216845   | 5.39E-109   |
| RP5-875H18.9 | FOXQ1   | 0.57118917   | 2.23E-39    |
| RP5-875H18.9 | LRG1    | 0.577121513  | 2.40E-40    |
| RP5-875H18.9 | LAMP5   | 0.536650386  | 4.14E-34    |
| RP5-875H18.9 | ALDH3B1 | 0.656103717  | 2.20E-55    |
| RP5-875H18.9 | CDH2    | -0.070615652 | 0.139625151 |
| RP5-875H18.9 | SCG5    | 0.201500212  | 2.10E-05    |
| RP5-875H18.9 | ZCCHC16 | 0.109153899  | 0.022175641 |
| RP5-875H18.9 | GRB7    | 0.581667254  | 4.21E-41    |
| RP5-875H18.9 | TIAM1   | 0.457500388  | 4.29E-24    |
| RP5-875H18.9 | FXYD5   | 0.508084509  | 3.44E-30    |
| RP5-875H18.9 | CLDN9   | 0.573618133  | 9.00E-40    |
| RP5-875H18.9 | FAM43A  | 0.441667382  | 2.19E-22    |
| RP5-875H18.9 | CHST2   | 0.453406966  | 1.21E-23    |
| RP5-875H18.9 | HMGA2   | 0.461614235  | 1.49E-24    |
| RP5-875H18.9 | GALNT7  | 0.382389773  | 9.82E-17    |
| RP5-875H18.9 | CBLN1   | 0.55899358   | 1.90E-37    |
| RP5-875H18.9 | STRA6   | 0.570974003  | 2.42E-39    |
| RP5-875H18.9 | MUC21   | 0.652050427  | 1.68E-54    |
| RP5-875H18.9 | PRR36   | 0.511361801  | 1.28E-30    |
| RP5-875H18.9 | NFE2L3  | 0.634045191  | 9.66E-51    |
| RP5-875H18.9 | NR1D1   | 0.373147517  | 5.96E-16    |
| RP5-875H18.9 | MUC1    | 0.781810084  | 1.09E-91    |
| RP5-875H18.9 | NAT8L   | 0.141729577  | 0.002919065 |
| RP5-875H18.9 | APOC1   | 0.205143727  | 1.48E-05    |
| RP5-875H18.9 | EVA1A   | 0.743484955  | 2.24E-78    |
| RP5-875H18.9 | ENTPD1  | 0.189903742  | 6.23E-05    |
| RP5-875H18.9 | COL1A1  | 0.612781237  | 1.31E-46    |
| RP5-875H18.9 | FNDC4   | 0.61607186   | 3.14E-47    |
| RP5-875H18.9 | FRMD3   | 0.034448434  | 0.471567676 |
| RP5-875H18.9 | SHROOM4 | 0.43689924   | 6.88E-22    |
| RP5-875H18.9 | NELL2   | 0.175783988  | 0.000214376 |
| RP5-875H18.9 | EPHB3   | 0.666960222  | 8.17E-58    |

|              |           |             |             |
|--------------|-----------|-------------|-------------|
| RP5-875H18.9 | TMC6      | 0.602034797 | 1.22E-44    |
| RP5-875H18.9 | NOD1      | 0.396293793 | 5.84E-18    |
| RP5-875H18.9 | GGCT      | 0.586069456 | 7.60E-42    |
| RP5-875H18.9 | ICAM1     | 0.625039945 | 5.94E-49    |
| RP5-875H18.9 | PRSS23    | 0.572949512 | 1.16E-39    |
| RP5-875H18.9 | CFI       | 0.586060095 | 7.63E-42    |
| RP5-875H18.9 | CD55      | 0.719944371 | 2.55E-71    |
| RP5-875H18.9 | RASD2     | 0.462334343 | 1.24E-24    |
| RP5-875H18.9 | KLK11     | 0.340576901 | 2.20E-13    |
| RP5-875H18.9 | ICAM5     | 0.466585063 | 4.08E-25    |
| RP5-875H18.9 | ADORA1    | 0.534907774 | 7.36E-34    |
| RP5-875H18.9 | ITGA2     | 0.701070233 | 3.63E-66    |
| RP5-875H18.9 | ABCC3     | 0.317829295 | 9.24E-12    |
| RP5-875H18.9 | MFGE8     | 0.623800713 | 1.04E-48    |
| RP5-875H18.9 | STK32A    | 0.395276253 | 7.21E-18    |
| RP5-875H18.9 | CYSLTR2   | 0.328151925 | 1.76E-12    |
| RP5-875H18.9 | LAD1      | 0.611696465 | 2.08E-46    |
| RP5-875H18.9 | MGAT3     | 0.598238665 | 5.83E-44    |
| RP5-875H18.9 | IGFBP6    | 0.578685694 | 1.32E-40    |
| RP5-875H18.9 | CYP2S1    | 0.766607119 | 4.20E-86    |
| RP5-875H18.9 | KCNJ2     | 0.481125365 | 8.15E-27    |
| RP5-875H18.9 | FAM20A    | 0.580664323 | 6.19E-41    |
| RP5-875H18.9 | TGFA      | 0.387187417 | 3.76E-17    |
| RP5-875H18.9 | MXRA8     | 0.617291377 | 1.85E-47    |
| RP5-875H18.9 | C8orf4    | 0.610305184 | 3.78E-46    |
| RP5-875H18.9 | CLDN10    | 0.65680084  | 1.55E-55    |
| RP5-875H18.9 | PDE5A     | 0.40276072  | 1.50E-18    |
| RP5-875H18.9 | APOE      | 0.184266989 | 0.000103127 |
| RP5-875H18.9 | SPOCK2    | 0.604258947 | 4.85E-45    |
| RP5-875H18.9 | TENM1     | 0.139902856 | 0.003309856 |
| RP5-875H18.9 | SLIT1     | 0.203332891 | 1.76E-05    |
| RP5-875H18.9 | CXCL14    | 0.421385509 | 2.52E-20    |
| RP5-875H18.9 | ECM1      | 0.297710251 | 1.96E-10    |
| RP5-875H18.9 | DUSP5     | 0.708353007 | 4.17E-68    |
| RP5-875H18.9 | SEZ6L2    | 0.552143267 | 2.14E-36    |
| RP5-875H18.9 | THRSP     | 0.157248982 | 0.000946623 |
| RP5-875H18.9 | C19orf33  | 0.751681729 | 5.12E-81    |
| RP5-875H18.9 | MPZL2     | 0.553639792 | 1.27E-36    |
| RP5-875H18.9 | CTSH      | 0.528834445 | 5.33E-33    |
| RP5-875H18.9 | CYP1B1    | 0.495069525 | 1.60E-28    |
| RP5-875H18.9 | ALOX5     | 0.754802006 | 4.74E-82    |
| RP5-875H18.9 | SYTL5     | 0.527889828 | 7.23E-33    |
| RP5-875H18.9 | TNFRSF12A | 0.633753573 | 1.11E-50    |
| RP5-875H18.9 | DUSP6     | 0.587318759 | 4.65E-42    |
| RP5-875H18.9 | ALOX15B   | 0.749011926 | 3.81E-80    |
| RP5-875H18.9 | SDC4      | 0.528453329 | 6.03E-33    |
| RP5-875H18.9 | MDK       | 0.559371292 | 1.66E-37    |
| RP5-875H18.9 | KRT19     | 0.841952191 | 3.58E-119   |
| RP5-875H18.9 | MET       | 0.595618364 | 1.69E-43    |
| RP5-875H18.9 | TESC      | 0.178059624 | 0.000176738 |
| RP5-875H18.9 | CXCL17    | 0.707849368 | 5.70E-68    |

|              |          |             |             |
|--------------|----------|-------------|-------------|
| RP5-875H18.9 | NPC2     | 0.485757627 | 2.25E-27    |
| RP5-875H18.9 | COMP     | 0.593874334 | 3.42E-43    |
| RP5-875H18.9 | TUSC3    | 0.415490044 | 9.45E-20    |
| RP5-875H18.9 | TMPRSS4  | 0.762994666 | 7.74E-85    |
| RP5-875H18.9 | LGALS3   | 0.709572949 | 1.95E-68    |
| RP5-875H18.9 | CRLF1    | 0.595660206 | 1.66E-43    |
| RP5-875H18.9 | CTXN1    | 0.640875504 | 3.88E-52    |
| RP5-875H18.9 | PCSK1N   | 0.39364711  | 1.01E-17    |
| RP5-875H18.9 | NMU      | 0.529069261 | 4.94E-33    |
| RP5-875H18.9 | GALE     | 0.577700776 | 1.92E-40    |
| RP5-875H18.9 | PCSK2    | 0.322623535 | 4.31E-12    |
| RP5-875H18.9 | GJB3     | 0.566109979 | 1.45E-38    |
| RP5-875H18.9 | SLPI     | 0.783519365 | 2.40E-92    |
| RP5-875H18.9 | AGR2     | 0.364427931 | 3.10E-15    |
| RP5-875H18.9 | MRC2     | 0.584461164 | 1.42E-41    |
| RP5-875H18.9 | GOLT1A   | 0.454029064 | 1.03E-23    |
| RP5-875H18.9 | SLC27A6  | 0.562020193 | 6.42E-38    |
| RP5-875H18.9 | KCNN4    | 0.796477189 | 1.60E-97    |
| RP5-875H18.9 | ETV4     | 0.37004477  | 1.08E-15    |
| RP5-875H18.9 | SYT12    | 0.577963458 | 1.74E-40    |
| RP5-875H18.9 | PVRL4    | 0.715100346 | 5.87E-70    |
| RP5-875H18.9 | PLCD3    | 0.547591001 | 1.03E-35    |
| RP5-875H18.9 | PLAU     | 0.769461309 | 4.05E-87    |
| RP5-875H18.9 | LRRK2    | 0.127157646 | 0.00764205  |
| RP5-875H18.9 | SFN      | 0.813411278 | 6.93E-105   |
| RP5-875H18.9 | LPAR5    | 0.412165521 | 1.97E-19    |
| RP5-875H18.9 | NGEF     | 0.642522377 | 1.76E-52    |
| RP5-875H18.9 | DTX4     | 0.542685277 | 5.50E-35    |
| RP5-875H18.9 | CST6     | 0.667092982 | 7.62E-58    |
| RP5-875H18.9 | QPCT     | 0.383995087 | 7.14E-17    |
| RP5-875H18.9 | TIMP1    | 0.633259838 | 1.39E-50    |
| RP5-875H18.9 | CAMK2N1  | 0.517307334 | 2.05E-31    |
| RP5-875H18.9 | KLHDC8A  | 0.269298977 | 9.89E-09    |
| RP5-875H18.9 | PDLIM4   | 0.751724847 | 4.95E-81    |
| RP5-875H18.9 | SCEL     | 0.57384181  | 8.28E-40    |
| RP5-875H18.9 | LCN2     | 0.8064309   | 9.19E-102   |
| RP5-875H18.9 | PROS1    | 0.62012415  | 5.31E-48    |
| RP5-875H18.9 | GABRB2   | 0.563293234 | 4.05E-38    |
| RP5-875H18.9 | TMPRSS6  | 0.69527065  | 1.15E-64    |
| RP5-875H18.9 | KLK7     | 0.519764703 | 9.52E-32    |
| RP5-875H18.9 | PDZK1IP1 | 0.641948929 | 2.32E-52    |
| RP5-875H18.9 | CDH3     | 0.475426487 | 3.87E-26    |
| RP5-875H18.9 | LRP4     | 0.179798549 | 0.000152253 |
| RP5-875H18.9 | IGSF1    | 0.34861691  | 5.45E-14    |
| RP5-875H18.9 | B3GNT3   | 0.784396628 | 1.10E-92    |
| RP5-875H18.9 | CLDN1    | 0.653488948 | 8.20E-55    |
| RP5-875H18.9 | GDF15    | 0.707079593 | 9.19E-68    |
| RP5-875H18.9 | ARHGAP36 | 0.42468645  | 1.19E-20    |
| RP5-875H18.9 | LAMB3    | 0.651104238 | 2.69E-54    |
| RP5-875H18.9 | KLK10    | 0.569803137 | 3.73E-39    |
| RP5-875H18.9 | DPP4     | 0.549333471 | 5.67E-36    |



|                |           |              |          |
|----------------|-----------|--------------|----------|
| RP5-875H18.9   | METTL7B   | 0.412729608  | 1.74E-19 |
| RP5-875H18.9   | LIPH      | 0.656782692  | 1.56E-55 |
| RP5-875H18.9   | CLDN16    | 0.570147943  | 3.29E-39 |
| RP5-875H18.9   | CHI3L1    | 0.615551318  | 3.94E-47 |
| RP5-875H18.9   | SLC22A31  | 0.625636096  | 4.54E-49 |
| RP5-875H18.9   | TACSTD2   | 0.655434387  | 3.09E-55 |
| RP5-875H18.9   | SFTPB     | 0.779303253  | 9.73E-91 |
| RP5-875H18.9   | RXRG      | 0.243986562  | 2.27E-07 |
| RP5-875H18.9   | DCSTAMP   | 0.606868654  | 1.62E-45 |
| RP5-875H18.9   | CITED1    | 0.446607714  | 6.56E-23 |
| RP5-875H18.9   | SERPINA1  | 0.734920114  | 1.01E-75 |
| RP5-875H18.9   | PRR15     | 0.34703585   | 7.19E-14 |
| RP5-875H18.9   | SLC34A2   | 0.668877294  | 2.97E-58 |
| RP5-875H18.9   | FN1       | 0.764849046  | 1.75E-85 |
| RP5-875H18.9   | ZCCHC12   | 0.266959088  | 1.34E-08 |
| RP11-1036E20.9 | TFF3      | -0.581516711 | 4.46E-41 |
| RP11-1036E20.9 | CCL21     | -0.262993518 | 2.23E-08 |
| RP11-1036E20.9 | TPO       | -0.598758416 | 4.71E-44 |
| RP11-1036E20.9 | MT1G      | -0.572931218 | 1.16E-39 |
| RP11-1036E20.9 | DIO1      | -0.617105917 | 2.00E-47 |
| RP11-1036E20.9 | DPT       | -0.210759075 | 8.45E-06 |
| RP11-1036E20.9 | CDH16     | -0.522234943 | 4.38E-32 |
| RP11-1036E20.9 | CRABP1    | -0.414795561 | 1.10E-19 |
| RP11-1036E20.9 | SLC26A7   | -0.518618867 | 1.36E-31 |
| RP11-1036E20.9 | MT1H      | -0.516008296 | 3.07E-31 |
| RP11-1036E20.9 | SLC26A4   | -0.498692326 | 5.58E-29 |
| RP11-1036E20.9 | SLC5A8    | -0.567278662 | 9.47E-39 |
| RP11-1036E20.9 | PKHD1L1   | -0.526777904 | 1.03E-32 |
| RP11-1036E20.9 | TFCP2L1   | -0.535053177 | 7.02E-34 |
| RP11-1036E20.9 | WSCD2     | -0.578639675 | 1.35E-40 |
| RP11-1036E20.9 | IPCEF1    | -0.541030437 | 9.60E-35 |
| RP11-1036E20.9 | SLC5A5    | -0.40426227  | 1.09E-18 |
| RP11-1036E20.9 | MT1F      | -0.608980971 | 6.63E-46 |
| RP11-1036E20.9 | FOSB      | -0.412887183 | 1.68E-19 |
| RP11-1036E20.9 | SEMA3D    | -0.553752439 | 1.22E-36 |
| RP11-1036E20.9 | BMP8A     | -0.495455157 | 1.43E-28 |
| RP11-1036E20.9 | MATN2     | -0.575776215 | 3.99E-40 |
| RP11-1036E20.9 | PLA2R1    | -0.49890476  | 5.24E-29 |
| RP11-1036E20.9 | COL23A1   | -0.481041994 | 8.34E-27 |
| RP11-1036E20.9 | HGD       | -0.617214368 | 1.91E-47 |
| RP11-1036E20.9 | TCEAL2    | -0.500443655 | 3.34E-29 |
| RP11-1036E20.9 | CHRDL1    | -0.246123969 | 1.76E-07 |
| RP11-1036E20.9 | TNFRSF11B | -0.491553163 | 4.38E-28 |
| RP11-1036E20.9 | FAM167A   | -0.619710887 | 6.38E-48 |
| RP11-1036E20.9 | KIT       | -0.493994073 | 2.18E-28 |
| RP11-1036E20.9 | SLC4A4    | -0.596617965 | 1.13E-43 |
| RP11-1036E20.9 | SMOC2     | -0.351699954 | 3.15E-14 |
| RP11-1036E20.9 | FHL1      | -0.670222815 | 1.45E-58 |
| RP11-1036E20.9 | OTOS      | -0.588712831 | 2.68E-42 |
| RP11-1036E20.9 | IGFBPL1   | -0.549155603 | 6.03E-36 |
| RP11-1036E20.9 | HBB       | -0.38539519  | 5.40E-17 |

|                |            |              |             |
|----------------|------------|--------------|-------------|
| RP11-1036E20.9 | BEX1       | -0.557043849 | 3.81E-37    |
| RP11-1036E20.9 | FABP4      | -0.520627675 | 7.27E-32    |
| RP11-1036E20.9 | LMOD1      | -0.517489025 | 1.94E-31    |
| RP11-1036E20.9 | SOD3       | -0.588737656 | 2.66E-42    |
| RP11-1036E20.9 | TMEM171    | -0.451631774 | 1.89E-23    |
| RP11-1036E20.9 | PI16       | -0.274576982 | 4.93E-09    |
| RP11-1036E20.9 | ZMAT4      | -0.647541342 | 1.55E-53    |
| RP11-1036E20.9 | MFAP4      | -0.175581437 | 0.000218067 |
| RP11-1036E20.9 | CWH43      | -0.468805225 | 2.27E-25    |
| RP11-1036E20.9 | SPX        | -0.629318196 | 8.53E-50    |
| RP11-1036E20.9 | APOD       | -0.084007354 | 0.078706642 |
| RP11-1036E20.9 | DPP6       | -0.5214101   | 5.68E-32    |
| RP11-1036E20.9 | MMRN1      | -0.334706646 | 5.95E-13    |
| RP11-1036E20.9 | WDR72      | -0.413628045 | 1.43E-19    |
| RP11-1036E20.9 | MPPED2     | -0.643100296 | 1.34E-52    |
| RP11-1036E20.9 | PAPSS2     | -0.372088462 | 7.31E-16    |
| RP11-1036E20.9 | DCN        | -0.025433892 | 0.595096012 |
| RP11-1036E20.9 | SORBS2     | -0.630040333 | 6.13E-50    |
| RP11-1036E20.9 | EGR2       | -0.338822423 | 2.97E-13    |
| RP11-1036E20.9 | EDN3       | -0.542976009 | 4.98E-35    |
| RP11-1036E20.9 | DI02       | -0.530051911 | 3.60E-33    |
| RP11-1036E20.9 | ITPR1      | -0.630650685 | 4.64E-50    |
| RP11-1036E20.9 | CFD        | -0.270874017 | 8.05E-09    |
| RP11-1036E20.9 | CPXM1      | -0.363180663 | 3.91E-15    |
| RP11-1036E20.9 | ELM01      | -0.643282018 | 1.22E-52    |
| RP11-1036E20.9 | GPC3       | -0.416896792 | 6.91E-20    |
| RP11-1036E20.9 | MYOC       | -0.160314721 | 0.000748363 |
| RP11-1036E20.9 | DEPTOR     | -0.636932447 | 2.51E-51    |
| RP11-1036E20.9 | DGKI       | -0.528089637 | 6.78E-33    |
| RP11-1036E20.9 | CARTPT     | -0.506012666 | 6.41E-30    |
| RP11-1036E20.9 | IYD        | -0.333004826 | 7.91E-13    |
| RP11-1036E20.9 | LYVE1      | -0.283810633 | 1.41E-09    |
| RP11-1036E20.9 | CLCNKB     | -0.602514791 | 1.00E-44    |
| RP11-1036E20.9 | NCAM1      | -0.438013168 | 5.28E-22    |
| RP11-1036E20.9 | HBA2       | -0.372758891 | 6.43E-16    |
| RP11-1036E20.9 | GLT8D2     | -0.445976748 | 7.66E-23    |
| RP11-1036E20.9 | OGDHL      | -0.455773582 | 6.65E-24    |
| RP11-1036E20.9 | LIFR       | -0.509463523 | 2.27E-30    |
| RP11-1036E20.9 | CSGALNACT1 | -0.466584571 | 4.08E-25    |
| RP11-1036E20.9 | RAP1GAP    | -0.465809095 | 5.00E-25    |
| RP11-1036E20.9 | COL9A3     | -0.560078938 | 1.29E-37    |
| RP11-1036E20.9 | FBLN1      | -0.08838699  | 0.064276702 |
| RP11-1036E20.9 | EFEMP1     | -0.422193324 | 2.10E-20    |
| RP11-1036E20.9 | AOX1       | -0.459259589 | 2.73E-24    |
| RP11-1036E20.9 | GRIN2C     | -0.590540552 | 1.30E-42    |
| RP11-1036E20.9 | C11orf74   | -0.559978785 | 1.34E-37    |
| RP11-1036E20.9 | PPARGC1A   | -0.528676936 | 5.61E-33    |
| RP11-1036E20.9 | ANGPTL1    | -0.541156338 | 9.20E-35    |
| RP11-1036E20.9 | SCARA5     | -0.208517513 | 1.06E-05    |
| RP11-1036E20.9 | LTF        | -0.444854779 | 1.01E-22    |
| RP11-1036E20.9 | CA4        | -0.607107077 | 1.47E-45    |

|                |          |              |             |
|----------------|----------|--------------|-------------|
| RP11-1036E20.9 | TG       | -0.538356168 | 2.35E-34    |
| RP11-1036E20.9 | FCGBP    | -0.637955823 | 1.55E-51    |
| RP11-1036E20.9 | PBX4     | -0.513154217 | 7.38E-31    |
| RP11-1036E20.9 | CYR61    | -0.42551653  | 9.85E-21    |
| RP11-1036E20.9 | FOS      | -0.451070861 | 2.17E-23    |
| RP11-1036E20.9 | KHDRBS2  | -0.473468954 | 6.55E-26    |
| RP11-1036E20.9 | MUM1L1   | -0.533092462 | 1.34E-33    |
| RP11-1036E20.9 | RGS16    | -0.463184264 | 9.93E-25    |
| RP11-1036E20.9 | MT1M     | -0.526561594 | 1.11E-32    |
| RP11-1036E20.9 | LRP2     | -0.524179769 | 2.37E-32    |
| RP11-1036E20.9 | MAFB     | -0.474234074 | 5.33E-26    |
| RP11-1036E20.9 | KCNK2    | -0.459362421 | 2.66E-24    |
| RP11-1036E20.9 | TBC1D4   | -0.481305002 | 7.76E-27    |
| RP11-1036E20.9 | MIOX     | -0.57560267  | 4.26E-40    |
| RP11-1036E20.9 | TPPP     | -0.49387186  | 2.26E-28    |
| RP11-1036E20.9 | FMOD     | -0.487753946 | 1.29E-27    |
| RP11-1036E20.9 | CITED2   | -0.445284118 | 9.08E-23    |
| RP11-1036E20.9 | RGS8     | -0.5705967   | 2.78E-39    |
| RP11-1036E20.9 | ABI3BP   | -0.227345277 | 1.49E-06    |
| RP11-1036E20.9 | ADH1B    | -0.295661828 | 2.63E-10    |
| RP11-1036E20.9 | OGN      | -0.154236082 | 0.001187732 |
| RP11-1036E20.9 | NR4A1    | -0.388912744 | 2.66E-17    |
| RP11-1036E20.9 | FOXJ1    | -0.599212898 | 3.91E-44    |
| RP11-1036E20.9 | ALDH1A1  | -0.605927369 | 2.41E-45    |
| RP11-1036E20.9 | OCA2     | -0.519578252 | 1.01E-31    |
| RP11-1036E20.9 | TMEM139  | -0.292497485 | 4.15E-10    |
| RP11-1036E20.9 | ARHGAP24 | -0.57932512  | 1.04E-40    |
| RP11-1036E20.9 | SLC25A15 | -0.485556539 | 2.38E-27    |
| RP11-1036E20.9 | DES      | -0.231471524 | 9.45E-07    |
| RP11-1036E20.9 | GDF10    | -0.40604139  | 7.44E-19    |
| RP11-1036E20.9 | KIAA1324 | -0.572801913 | 1.22E-39    |
| RP11-1036E20.9 | JUN      | -0.438302278 | 4.92E-22    |
| RP11-1036E20.9 | C7       | -0.014288397 | 0.765293453 |
| RP11-1036E20.9 | LGI3     | -0.667258514 | 6.98E-58    |
| RP11-1036E20.9 | CDON     | -0.678801074 | 1.38E-60    |
| RP11-1036E20.9 | BCL2     | -0.596197067 | 1.34E-43    |
| RP11-1036E20.9 | HLF      | -0.627615525 | 1.85E-49    |
| RP11-1036E20.9 | EGR1     | -0.437159314 | 6.47E-22    |
| RP11-1036E20.9 | IP6K3    | -0.433316475 | 1.61E-21    |
| RP11-1036E20.9 | SCUBE3   | -0.462527666 | 1.18E-24    |
| RP11-1036E20.9 | PKNOX2   | -0.610412619 | 3.61E-46    |
| RP11-1036E20.9 | SMAD9    | -0.480045571 | 1.10E-26    |
| RP11-1036E20.9 | IQGAP2   | -0.553329606 | 1.41E-36    |
| RP11-1036E20.9 | GNA14    | -0.676815179 | 4.12E-60    |
| RP11-1036E20.9 | LAYN     | -0.488886129 | 9.34E-28    |
| RP11-1036E20.9 | AVPR1A   | -0.542806947 | 5.28E-35    |
| RP11-1036E20.9 | PDLIM3   | -0.438934618 | 4.23E-22    |
| RP11-1036E20.9 | GPM6A    | -0.420920416 | 2.80E-20    |
| RP11-1036E20.9 | SDPR     | -0.46379036  | 8.48E-25    |
| RP11-1036E20.9 | CRYAB    | -0.19258893  | 4.87E-05    |
| RP11-1036E20.9 | FOXA2    | -0.489629737 | 7.57E-28    |

|                |          |              |             |
|----------------|----------|--------------|-------------|
| RP11-1036E20.9 | C8orf88  | -0.452074518 | 1.69E-23    |
| RP11-1036E20.9 | ISM1     | -0.500247818 | 3.54E-29    |
| RP11-1036E20.9 | BMP2     | -0.346683581 | 7.65E-14    |
| RP11-1036E20.9 | ID4      | -0.614400793 | 6.50E-47    |
| RP11-1036E20.9 | NUPR1    | -0.286194373 | 1.01E-09    |
| RP11-1036E20.9 | SERTM1   | -0.501632159 | 2.35E-29    |
| RP11-1036E20.9 | IRS1     | -0.601608804 | 1.46E-44    |
| RP11-1036E20.9 | FIBIN    | -0.176898462 | 0.000195093 |
| RP11-1036E20.9 | PODN     | -0.111128739 | 0.019859858 |
| RP11-1036E20.9 | TDRD9    | -0.390253531 | 2.02E-17    |
| RP11-1036E20.9 | EPHA3    | -0.294506361 | 3.11E-10    |
| RP11-1036E20.9 | AIF1L    | -0.370581983 | 9.74E-16    |
| RP11-1036E20.9 | EBF4     | -0.668705696 | 3.25E-58    |
| RP11-1036E20.9 | ADM2     | -0.548336568 | 7.99E-36    |
| RP11-1036E20.9 | GSTM3    | -0.617903807 | 1.41E-47    |
| RP11-1036E20.9 | HSD17B6  | -0.301632473 | 1.10E-10    |
| RP11-1036E20.9 | AGR3     | -0.33214726  | 9.12E-13    |
| RP11-1036E20.9 | EPHB1    | -0.389242284 | 2.48E-17    |
| RP11-1036E20.9 | TMOD1    | -0.335067396 | 5.60E-13    |
| RP11-1036E20.9 | WASF3    | -0.591656846 | 8.33E-43    |
| RP11-1036E20.9 | SELV     | -0.654657471 | 4.57E-55    |
| RP11-1036E20.9 | ENPP1    | -0.190318891 | 6.00E-05    |
| RP11-1036E20.9 | SYNE1    | -0.629715781 | 7.12E-50    |
| RP11-1036E20.9 | PLCH1    | -0.539878039 | 1.41E-34    |
| RP11-1036E20.9 | CCDC146  | -0.543912247 | 3.63E-35    |
| RP11-1036E20.9 | SLC16A2  | -0.593541098 | 3.91E-43    |
| RP11-1036E20.9 | IER2     | -0.57597489  | 3.70E-40    |
| RP11-1036E20.9 | KCNAB1   | -0.651455409 | 2.26E-54    |
| RP11-1036E20.9 | SYNDIG1  | -0.506454252 | 5.62E-30    |
| RP11-1036E20.9 | C16orf89 | -0.60405865  | 5.27E-45    |
| RP11-1036E20.9 | CTGF     | -0.293643783 | 3.52E-10    |
| RP11-1036E20.9 | NR4A3    | -0.250851507 | 1.00E-07    |
| RP11-1036E20.9 | KIAA1456 | -0.423195421 | 1.67E-20    |
| RP11-1036E20.9 | AQP4     | -0.417739708 | 5.73E-20    |
| RP11-1036E20.9 | RNF150   | -0.623595787 | 1.13E-48    |
| RP11-1036E20.9 | C1S      | 0.008874533  | 0.852903058 |
| RP11-1036E20.9 | PFKFB2   | -0.428479838 | 4.97E-21    |
| RP11-1036E20.9 | PROX1    | -0.465770013 | 5.06E-25    |
| RP11-1036E20.9 | TCF7L1   | -0.677606544 | 2.67E-60    |
| RP11-1036E20.9 | HSPB6    | -0.328297707 | 1.72E-12    |
| RP11-1036E20.9 | FHDC1    | -0.283525282 | 1.47E-09    |
| RP11-1036E20.9 | PRR15L   | -0.408256668 | 4.61E-19    |
| RP11-1036E20.9 | SLC1A1   | -0.312598302 | 2.09E-11    |
| RP11-1036E20.9 | BTBD11   | -0.696823929 | 4.61E-65    |
| RP11-1036E20.9 | TRIM58   | -0.535415628 | 6.23E-34    |
| RP11-1036E20.9 | LRIG1    | -0.422630606 | 1.90E-20    |
| RP11-1036E20.9 | ROR2     | -0.372786838 | 6.39E-16    |
| RP11-1036E20.9 | GPR125   | -0.548106259 | 8.65E-36    |
| RP11-1036E20.9 | FLRT1    | -0.677983394 | 2.17E-60    |
| RP11-1036E20.9 | PGF      | -0.61998574  | 5.65E-48    |
| RP11-1036E20.9 | DUSP1    | -0.391183989 | 1.67E-17    |

|                |          |              |             |
|----------------|----------|--------------|-------------|
| RP11-1036E20.9 | PLA2G7   | -0.357753322 | 1.06E-14    |
| RP11-1036E20.9 | PLSCR4   | -0.286398084 | 9.83E-10    |
| RP11-1036E20.9 | FAM46B   | -0.392675006 | 1.23E-17    |
| RP11-1036E20.9 | GLDC     | -0.512241704 | 9.75E-31    |
| RP11-1036E20.9 | ZBTB16   | -0.416702855 | 7.22E-20    |
| RP11-1036E20.9 | OMD      | -0.059205688 | 0.215698866 |
| RP11-1036E20.9 | HSD11B2  | -0.56877033  | 5.47E-39    |
| RP11-1036E20.9 | FGL2     | -0.158976115 | 0.000829661 |
| RP11-1036E20.9 | CLCNKA   | -0.636281688 | 3.40E-51    |
| RP11-1036E20.9 | GATM     | -0.425371266 | 1.02E-20    |
| RP11-1036E20.9 | TNS3     | -0.408511235 | 4.36E-19    |
| RP11-1036E20.9 | TOB1     | -0.451510697 | 1.95E-23    |
| RP11-1036E20.9 | MARC2    | -0.552128125 | 2.15E-36    |
| RP11-1036E20.9 | LRRC2    | -0.470476281 | 1.46E-25    |
| RP11-1036E20.9 | SORD     | -0.227726241 | 1.43E-06    |
| RP11-1036E20.9 | RIMS4    | -0.534460983 | 8.53E-34    |
| RP11-1036E20.9 | SLC29A4  | -0.651423278 | 2.29E-54    |
| RP11-1036E20.9 | SLC39A14 | -0.49889788  | 5.26E-29    |
| RP11-1036E20.9 | FAXDC2   | -0.556729842 | 4.26E-37    |
| RP11-1036E20.9 | HSPB8    | -0.360054713 | 6.97E-15    |
| RP11-1036E20.9 | CCL19    | 0.114282467  | 0.016597272 |
| RP11-1036E20.9 | KCNIP3   | -0.627880022 | 1.64E-49    |
| RP11-1036E20.9 | CGNL1    | -0.570768566 | 2.61E-39    |
| RP11-1036E20.9 | ATF3     | -0.180178118 | 0.000147349 |
| RP11-1036E20.9 | SGCD     | -0.345660275 | 9.15E-14    |
| RP11-1036E20.9 | STARD13  | -0.535244049 | 6.59E-34    |
| RP11-1036E20.9 | LDHD     | -0.554763666 | 8.53E-37    |
| RP11-1036E20.9 | RCAN1    | -0.432733148 | 1.84E-21    |
| RP11-1036E20.9 | ID3      | -0.522489014 | 4.04E-32    |
| RP11-1036E20.9 | SYTL3    | -0.495450972 | 1.43E-28    |
| RP11-1036E20.9 | MT1E     | -0.451857189 | 1.78E-23    |
| RP11-1036E20.9 | CAMK1D   | -0.483938983 | 3.74E-27    |
| RP11-1036E20.9 | PRKCQ    | -0.51365406  | 6.33E-31    |
| RP11-1036E20.9 | NUAK2    | -0.346188419 | 8.34E-14    |
| RP11-1036E20.9 | LIPG     | -0.534326997 | 8.91E-34    |
| RP11-1036E20.9 | SLC25A25 | -0.343739707 | 1.28E-13    |
| RP11-1036E20.9 | PRKX     | -0.213144762 | 6.64E-06    |
| RP11-1036E20.9 | SRPX     | -0.261173151 | 2.80E-08    |
| RP11-1036E20.9 | FAM189A1 | -0.595482449 | 1.79E-43    |
| RP11-1036E20.9 | PLEKHH1  | -0.39023133  | 2.03E-17    |
| RP11-1036E20.9 | WNT11    | -0.489378453 | 8.13E-28    |
| RP11-1036E20.9 | SNAI1    | -0.408815453 | 4.09E-19    |
| RP11-1036E20.9 | FDCSP    | 0.084874481  | 0.07565807  |
| RP11-1036E20.9 | MT1X     | -0.331053829 | 1.09E-12    |
| RP11-1036E20.9 | ACACB    | -0.59187382  | 7.64E-43    |
| RP11-1036E20.9 | ARC      | -0.216422148 | 4.74E-06    |
| RP11-1036E20.9 | KLK4     | -0.169267941 | 0.000367784 |
| RP11-1036E20.9 | ZFPM2    | -0.426934489 | 7.11E-21    |
| RP11-1036E20.9 | AKAP12   | -0.319445588 | 7.16E-12    |
| RP11-1036E20.9 | GJB6     | -0.347193332 | 7.00E-14    |
| RP11-1036E20.9 | ERO1LB   | -0.54161802  | 7.88E-35    |

|                |          |              |             |
|----------------|----------|--------------|-------------|
| RP11-1036E20.9 | DNALI1   | -0.572317604 | 1.47E-39    |
| RP11-1036E20.9 | HKDC1    | -0.396249375 | 5.89E-18    |
| RP11-1036E20.9 | ZFP36L2  | -0.384387134 | 6.60E-17    |
| RP11-1036E20.9 | CAPSL    | -0.642051827 | 2.21E-52    |
| RP11-1036E20.9 | CYP7B1   | -0.482925679 | 4.96E-27    |
| RP11-1036E20.9 | CPQ      | -0.576073624 | 3.57E-40    |
| RP11-1036E20.9 | RPS6KA6  | -0.568689986 | 5.64E-39    |
| RP11-1036E20.9 | TLE1     | -0.485191321 | 2.64E-27    |
| RP11-1036E20.9 | TP53INP2 | -0.644235245 | 7.73E-53    |
| RP11-1036E20.9 | KATNAL2  | -0.629614754 | 7.45E-50    |
| RP11-1036E20.9 | SGPP2    | -0.197885973 | 2.97E-05    |
| RP11-1036E20.9 | CTH      | -0.454468331 | 9.25E-24    |
| RP11-1036E20.9 | KIF12    | -0.345719218 | 9.05E-14    |
| RP11-1036E20.9 | TMEM220  | -0.54348305  | 4.20E-35    |
| RP11-1036E20.9 | CENPJ    | -0.415135163 | 1.02E-19    |
| RP11-1036E20.9 | FAM155B  | -0.565573875 | 1.77E-38    |
| RP11-1036E20.9 | WFS1     | -0.665612303 | 1.66E-57    |
| RP11-1036E20.9 | SELENBP1 | -0.522966088 | 3.48E-32    |
| RP11-1036E20.9 | SNTA1    | -0.495441539 | 1.43E-28    |
| RP11-1036E20.9 | FRAS1    | -0.192581128 | 4.87E-05    |
| RP11-1036E20.9 | FBLN7    | -0.474587518 | 4.85E-26    |
| RP11-1036E20.9 | AGPAT9   | -0.522497596 | 4.03E-32    |
| RP11-1036E20.9 | GPR83    | -0.477709638 | 2.08E-26    |
| RP11-1036E20.9 | PRTG     | -0.424699914 | 1.19E-20    |
| RP11-1036E20.9 | EGR3     | -0.229205767 | 1.21E-06    |
| RP11-1036E20.9 | GRAMD2   | -0.367589238 | 1.72E-15    |
| RP11-1036E20.9 | HYOU1    | -0.615494248 | 4.04E-47    |
| RP11-1036E20.9 | FBLN5    | -0.275011782 | 4.65E-09    |
| RP11-1036E20.9 | ITM2A    | -0.544905903 | 2.59E-35    |
| RP11-1036E20.9 | SRF      | -0.481769806 | 6.83E-27    |
| RP11-1036E20.9 | FGFR2    | -0.324448201 | 3.22E-12    |
| RP11-1036E20.9 | MT1A     | -0.33063578  | 1.17E-12    |
| RP11-1036E20.9 | MAMDC2   | -0.208186196 | 1.09E-05    |
| RP11-1036E20.9 | FHL2     | -0.426350169 | 8.13E-21    |
| RP11-1036E20.9 | FTCDNL1  | -0.434879699 | 1.11E-21    |
| RP11-1036E20.9 | PKIA     | -0.414583116 | 1.16E-19    |
| RP11-1036E20.9 | DNAJB4   | -0.379730517 | 1.66E-16    |
| RP11-1036E20.9 | SLC25A33 | -0.659204924 | 4.56E-56    |
| RP11-1036E20.9 | EYA2     | -0.246269863 | 1.73E-07    |
| RP11-1036E20.9 | LPAR1    | -0.226125851 | 1.70E-06    |
| RP11-1036E20.9 | STX11    | -0.162708445 | 0.000621092 |
| RP11-1036E20.9 | ARHGEF28 | -0.428194913 | 5.31E-21    |
| RP11-1036E20.9 | OR2W3    | -0.623315827 | 1.29E-48    |
| RP11-1036E20.9 | ALDH1B1  | -0.434512014 | 1.21E-21    |
| RP11-1036E20.9 | CXCL12   | -0.174801208 | 0.000232846 |
| RP11-1036E20.9 | OLFM2    | -0.559143444 | 1.80E-37    |
| RP11-1036E20.9 | TUB      | -0.343199505 | 1.40E-13    |
| RP11-1036E20.9 | HTRA3    | -0.179726791 | 0.000153197 |
| RP11-1036E20.9 | CKB      | -0.481613122 | 7.13E-27    |
| RP11-1036E20.9 | RGS2     | -0.109576509 | 0.021661282 |
| RP11-1036E20.9 | SHANK2   | -0.580785354 | 5.91E-41    |

|                |          |              |             |
|----------------|----------|--------------|-------------|
| RP11-1036E20.9 | CNTRF    | -0.550615333 | 3.64E-36    |
| RP11-1036E20.9 | CYTH3    | -0.494246441 | 2.02E-28    |
| RP11-1036E20.9 | PLAC9    | -0.385074587 | 5.75E-17    |
| RP11-1036E20.9 | WVOX     | -0.607814103 | 1.09E-45    |
| RP11-1036E20.9 | NPR3     | -0.458113842 | 3.67E-24    |
| RP11-1036E20.9 | SDC2     | -0.455348925 | 7.41E-24    |
| RP11-1036E20.9 | KLF15    | -0.497065478 | 8.96E-29    |
| RP11-1036E20.9 | TMEM164  | -0.58664026  | 6.07E-42    |
| RP11-1036E20.9 | LONRF3   | -0.232941928 | 8.02E-07    |
| RP11-1036E20.9 | GBP1     | -0.108108757 | 0.023493368 |
| RP11-1036E20.9 | ARHGAP6  | -0.267033307 | 1.33E-08    |
| RP11-1036E20.9 | TMEM119  | -0.112731612 | 0.018137868 |
| RP11-1036E20.9 | SH3RF1   | -0.400991463 | 2.18E-18    |
| RP11-1036E20.9 | CRELD2   | -0.572857309 | 1.20E-39    |
| RP11-1036E20.9 | PCP4     | -0.053366926 | 0.264521231 |
| RP11-1036E20.9 | GCSH     | -0.625818233 | 4.18E-49    |
| RP11-1036E20.9 | IMPA2    | -0.508955594 | 2.65E-30    |
| RP11-1036E20.9 | C1R      | -0.00566985  | 0.905704134 |
| RP11-1036E20.9 | SUCNR1   | -0.334830915 | 5.83E-13    |
| RP11-1036E20.9 | SFRP1    | -0.402188263 | 1.69E-18    |
| RP11-1036E20.9 | UGT8     | -0.48182889  | 6.72E-27    |
| RP11-1036E20.9 | TLE4     | -0.244120546 | 2.23E-07    |
| RP11-1036E20.9 | ANTXR1   | -0.381936295 | 1.07E-16    |
| RP11-1036E20.9 | GPX3     | -0.443162038 | 1.52E-22    |
| RP11-1036E20.9 | DPY19L2  | -0.482046219 | 6.32E-27    |
| RP11-1036E20.9 | FAM46C   | -0.454952498 | 8.19E-24    |
| RP11-1036E20.9 | IL33     | -0.177998946 | 0.000177656 |
| RP11-1036E20.9 | PEG3     | -0.54965324  | 5.07E-36    |
| RP11-1036E20.9 | FAHD2A   | -0.502899602 | 1.62E-29    |
| RP11-1036E20.9 | PTGDS    | 0.004722085  | 0.921410501 |
| RP11-1036E20.9 | CHCHD10  | -0.453903516 | 1.07E-23    |
| RP11-1036E20.9 | CD36     | -0.573378218 | 9.85E-40    |
| RP11-1036E20.9 | ANKRD37  | -0.511828822 | 1.11E-30    |
| RP11-1036E20.9 | TSPAN33  | -0.575323682 | 4.74E-40    |
| RP11-1036E20.9 | PRDM16   | -0.574347049 | 6.85E-40    |
| RP11-1036E20.9 | UST      | -0.561719688 | 7.16E-38    |
| RP11-1036E20.9 | NEXN     | -0.432402331 | 1.99E-21    |
| RP11-1036E20.9 | NUPR1L   | -0.292265861 | 4.29E-10    |
| RP11-1036E20.9 | SLC24A3  | -0.537529268 | 3.09E-34    |
| RP11-1036E20.9 | MARC1    | -0.619564346 | 6.80E-48    |
| RP11-1036E20.9 | MYH11    | -0.261133785 | 2.82E-08    |
| RP11-1036E20.9 | APOA1    | -0.587279288 | 4.72E-42    |
| RP11-1036E20.9 | TMEM178B | -0.560296551 | 1.19E-37    |
| RP11-1036E20.9 | CAPN6    | -0.24163725  | 2.98E-07    |
| RP11-1036E20.9 | PPM1L    | -0.653701333 | 7.37E-55    |
| RP11-1036E20.9 | FZD8     | -0.636940249 | 2.50E-51    |
| RP11-1036E20.9 | RCAN2    | -0.618320733 | 1.18E-47    |
| RP11-1036E20.9 | COPZ2    | -0.544239446 | 3.25E-35    |
| RP11-1036E20.9 | GAS1     | -0.13396454  | 0.004930349 |
| RP11-1036E20.9 | DACT1    | -0.437051217 | 6.64E-22    |
| RP11-1036E20.9 | WBSCR17  | -0.638219824 | 1.37E-51    |

|                |          |              |             |
|----------------|----------|--------------|-------------|
| RP11-1036E20.9 | NCS1     | -0.495210378 | 1.53E-28    |
| RP11-1036E20.9 | SPIRE2   | -0.39075919  | 1.82E-17    |
| RP11-1036E20.9 | C15orf52 | -0.344026264 | 1.21E-13    |
| RP11-1036E20.9 | SPAG5    | -0.434309919 | 1.27E-21    |
| RP11-1036E20.9 | ARL4D    | -0.483903305 | 3.78E-27    |
| RP11-1036E20.9 | FAM189A2 | -0.412693473 | 1.75E-19    |
| RP11-1036E20.9 | MAP1LC3A | -0.65203058  | 1.70E-54    |
| RP11-1036E20.9 | KLF6     | -0.052386676 | 0.273409106 |
| RP11-1036E20.9 | ADD3     | -0.267663518 | 1.22E-08    |
| RP11-1036E20.9 | TSPAN7   | -0.492021371 | 3.83E-28    |
| RP11-1036E20.9 | KLF9     | -0.39316421  | 1.11E-17    |
| RP11-1036E20.9 | KCNQ1    | -0.610058537 | 4.19E-46    |
| RP11-1036E20.9 | MAN1A1   | -0.141657239 | 0.002933705 |
| RP11-1036E20.9 | MLF1     | -0.313668633 | 1.77E-11    |
| RP11-1036E20.9 | RARB     | -0.557283237 | 3.50E-37    |
| RP11-1036E20.9 | CDC42EP2 | -0.415437466 | 9.56E-20    |
| RP11-1036E20.9 | FAM3B    | -0.130548912 | 0.0061582   |
| RP11-1036E20.9 | GADD45B  | -0.265862538 | 1.54E-08    |
| RP11-1036E20.9 | TMEM47   | -0.554896943 | 8.14E-37    |
| RP11-1036E20.9 | SDF2L1   | -0.542320793 | 6.22E-35    |
| RP11-1036E20.9 | CCDC85A  | -0.280277332 | 2.29E-09    |
| RP11-1036E20.9 | CRYBG3   | -0.170769483 | 0.000325325 |
| RP11-1036E20.9 | FBLN2    | -0.004999634 | 0.916807524 |
| RP11-1036E20.9 | PEBP4    | -0.228720749 | 1.28E-06    |
| RP11-1036E20.9 | CDADC1   | -0.625982932 | 3.88E-49    |
| RP11-1036E20.9 | FAM63A   | -0.495261873 | 1.51E-28    |
| RP11-1036E20.9 | GLUL     | -0.284129959 | 1.35E-09    |
| RP11-1036E20.9 | FREM2    | -0.367884945 | 1.62E-15    |
| RP11-1036E20.9 | ACKR3    | -0.496212192 | 1.15E-28    |
| RP11-1036E20.9 | DENND6A  | -0.5962614   | 1.30E-43    |
| RP11-1036E20.9 | CLDN8    | -0.043394896 | 0.364375559 |
| RP11-1036E20.9 | UTS2R    | -0.190135373 | 6.10E-05    |
| RP11-1036E20.9 | SCNN1B   | -0.294995848 | 2.90E-10    |
| RP11-1036E20.9 | TTC30A   | -0.532798742 | 1.47E-33    |
| RP11-1036E20.9 | CORO2B   | -0.584379157 | 1.47E-41    |
| RP11-1036E20.9 | TC2N     | -0.274849566 | 4.76E-09    |
| RP11-1036E20.9 | ALDH2    | -0.535433432 | 6.19E-34    |
| RP11-1036E20.9 | GPR183   | -0.074804771 | 0.117569128 |
| RP11-1036E20.9 | C4orf47  | -0.484204686 | 3.47E-27    |
| RP11-1036E20.9 | SLC25A42 | -0.65817715  | 7.70E-56    |
| RP11-1036E20.9 | LGMN     | -0.595904978 | 1.51E-43    |
| RP11-1036E20.9 | ACSF2    | -0.573420208 | 9.70E-40    |
| RP11-1036E20.9 | KIAA1467 | -0.520645688 | 7.23E-32    |
| RP11-1036E20.9 | PRKG1    | -0.619266937 | 7.76E-48    |
| RP11-1036E20.9 | GNAI1    | -0.588519972 | 2.90E-42    |
| RP11-1036E20.9 | ABCC4    | -0.412882147 | 1.68E-19    |
| RP11-1036E20.9 | PRPS1    | -0.582599172 | 2.94E-41    |
| RP11-1036E20.9 | TSPAN5   | -0.352478551 | 2.75E-14    |
| RP11-1036E20.9 | CR2      | -0.125064845 | 0.008709911 |
| RP11-1036E20.9 | CCDC170  | -0.455663924 | 6.84E-24    |
| RP11-1036E20.9 | RRAD     | -0.045781402 | 0.338570342 |



|                |          |              |             |
|----------------|----------|--------------|-------------|
| RP11-1036E20.9 | SCGB2A1  | -0.470549196 | 1.43E-25    |
| RP11-1036E20.9 | SESN3    | -0.328453327 | 1.68E-12    |
| RP11-1036E20.9 | SGK223   | -0.248765744 | 1.29E-07    |
| RP11-1036E20.9 | NDRG2    | -0.62186368  | 2.46E-48    |
| RP11-1036E20.9 | C3orf52  | -0.270289413 | 8.69E-09    |
| RP11-1036E20.9 | FLRT3    | 0.334692248  | 5.96E-13    |
| RP11-1036E20.9 | MST1R    | 0.662141137  | 1.01E-56    |
| RP11-1036E20.9 | SDC1     | 0.370213786  | 1.04E-15    |
| RP11-1036E20.9 | ST8SIA4  | 0.499405171  | 4.53E-29    |
| RP11-1036E20.9 | UBTD1    | 0.313419244  | 1.84E-11    |
| RP11-1036E20.9 | EPHA2    | 0.358265507  | 9.66E-15    |
| RP11-1036E20.9 | TMEM130  | 0.272954603  | 6.12E-09    |
| RP11-1036E20.9 | SPINK2   | 0.440109926  | 3.19E-22    |
| RP11-1036E20.9 | MMP16    | 0.566352898  | 1.33E-38    |
| RP11-1036E20.9 | SIGLEC15 | 0.553510832  | 1.32E-36    |
| RP11-1036E20.9 | RIN1     | 0.532250737  | 1.76E-33    |
| RP11-1036E20.9 | IL1RN    | 0.621376604  | 3.05E-48    |
| RP11-1036E20.9 | FCER1G   | 0.330539374  | 1.19E-12    |
| RP11-1036E20.9 | CD276    | 0.545062658  | 2.45E-35    |
| RP11-1036E20.9 | CTSB     | 0.499585545  | 4.30E-29    |
| RP11-1036E20.9 | FAM171A2 | 0.069241174  | 0.147514675 |
| RP11-1036E20.9 | ASPHD1   | 0.546628152  | 1.44E-35    |
| RP11-1036E20.9 | C15orf48 | 0.527152015  | 9.16E-33    |
| RP11-1036E20.9 | DYSF     | 0.060181159  | 0.208217801 |
| RP11-1036E20.9 | PDZRN4   | 0.152217775  | 0.001379609 |
| RP11-1036E20.9 | EFHD2    | 0.121926393  | 0.010560831 |
| RP11-1036E20.9 | ASF1B    | 0.398363795  | 3.79E-18    |
| RP11-1036E20.9 | AQP1     | 0.113547518  | 0.017312471 |
| RP11-1036E20.9 | ARRDC2   | 0.543854013  | 3.70E-35    |
| RP11-1036E20.9 | PRSS1    | 0.531864046  | 2.00E-33    |
| RP11-1036E20.9 | MAPK13   | 0.501573355  | 2.40E-29    |
| RP11-1036E20.9 | CST5     | 0.63814719   | 1.41E-51    |
| RP11-1036E20.9 | AHR      | 0.529120602  | 4.86E-33    |
| RP11-1036E20.9 | BAX      | 0.374154295  | 4.91E-16    |
| RP11-1036E20.9 | C1orf115 | 0.406239919  | 7.13E-19    |
| RP11-1036E20.9 | PLK3     | 0.376774089  | 2.96E-16    |
| RP11-1036E20.9 | JAG2     | 0.242575623  | 2.67E-07    |
| RP11-1036E20.9 | RAD23B   | 0.550443044  | 3.86E-36    |
| RP11-1036E20.9 | CA12     | -0.277233944 | 3.46E-09    |
| RP11-1036E20.9 | ADTRP    | 0.536345093  | 4.58E-34    |
| RP11-1036E20.9 | UCP2     | 0.422464985  | 1.98E-20    |
| RP11-1036E20.9 | IGFBP2   | 0.235460434  | 6.05E-07    |
| RP11-1036E20.9 | LOXL2    | 0.282318623  | 1.73E-09    |
| RP11-1036E20.9 | GPX1     | 0.274146367  | 5.22E-09    |
| RP11-1036E20.9 | P3H3     | 0.376566336  | 3.08E-16    |
| RP11-1036E20.9 | C2orf81  | 0.394580963  | 8.32E-18    |
| RP11-1036E20.9 | CDT1     | 0.446995656  | 5.96E-23    |
| RP11-1036E20.9 | SNX25    | 0.301250799  | 1.16E-10    |
| RP11-1036E20.9 | MTHFD1L  | 0.515412908  | 3.68E-31    |
| RP11-1036E20.9 | CDC42BPG | 0.619492871  | 7.02E-48    |
| RP11-1036E20.9 | MSN      | 0.614365115  | 6.60E-47    |

|                |          |              |             |
|----------------|----------|--------------|-------------|
| RP11-1036E20.9 | SIGLEC6  | 0.545079695  | 2.44E-35    |
| RP11-1036E20.9 | F2R      | 0.175621512  | 0.000217332 |
| RP11-1036E20.9 | TMEM184A | 0.621438739  | 2.97E-48    |
| RP11-1036E20.9 | CKS2     | 0.212331693  | 7.21E-06    |
| RP11-1036E20.9 | TAX1BP3  | 0.506317641  | 5.85E-30    |
| RP11-1036E20.9 | PMEPA1   | 0.524213035  | 2.34E-32    |
| RP11-1036E20.9 | CXCL16   | 0.575926799  | 3.77E-40    |
| RP11-1036E20.9 | FAXC     | 0.56001652   | 1.32E-37    |
| RP11-1036E20.9 | VTCN1    | 0.6601333    | 2.84E-56    |
| RP11-1036E20.9 | SH2D4A   | 0.508777347  | 2.79E-30    |
| RP11-1036E20.9 | RNF24    | 0.387479038  | 3.55E-17    |
| RP11-1036E20.9 | LY6G6C   | 0.633733557  | 1.12E-50    |
| RP11-1036E20.9 | NID1     | 0.332895097  | 8.05E-13    |
| RP11-1036E20.9 | STAC     | 0.695593863  | 9.54E-65    |
| RP11-1036E20.9 | RAB34    | 0.46521527   | 5.85E-25    |
| RP11-1036E20.9 | HES4     | 0.311498534  | 2.48E-11    |
| RP11-1036E20.9 | EPHA10   | 0.611982581  | 1.84E-46    |
| RP11-1036E20.9 | ENTPD2   | 0.471518382  | 1.11E-25    |
| RP11-1036E20.9 | DDB2     | 0.537887747  | 2.75E-34    |
| RP11-1036E20.9 | NKAIN4   | 0.337082584  | 3.99E-13    |
| RP11-1036E20.9 | TRIM29   | 0.520050941  | 8.71E-32    |
| RP11-1036E20.9 | ADCY8    | 0.537417784  | 3.21E-34    |
| RP11-1036E20.9 | SFTA2    | 0.505095236  | 8.43E-30    |
| RP11-1036E20.9 | NRIP1    | 0.465557152  | 5.35E-25    |
| RP11-1036E20.9 | VWA1     | -0.015282337 | 0.749494296 |
| RP11-1036E20.9 | APLNR    | 0.179948731  | 0.000150295 |
| RP11-1036E20.9 | REN      | 0.483765193  | 3.93E-27    |
| RP11-1036E20.9 | EDIL3    | 0.210937211  | 8.30E-06    |
| RP11-1036E20.9 | AGRN     | 0.33957279   | 2.61E-13    |
| RP11-1036E20.9 | TREM1    | 0.390354961  | 1.98E-17    |
| RP11-1036E20.9 | SRL      | 0.286360775  | 9.88E-10    |
| RP11-1036E20.9 | RASGRF1  | 0.580994384  | 5.45E-41    |
| RP11-1036E20.9 | RMI2     | 0.474624827  | 4.80E-26    |
| RP11-1036E20.9 | SAMD1    | 0.378372423  | 2.17E-16    |
| RP11-1036E20.9 | MGAT4B   | 0.607097854  | 1.47E-45    |
| RP11-1036E20.9 | NXN      | 0.599709231  | 3.19E-44    |
| RP11-1036E20.9 | SH3BGRL3 | 0.479810794  | 1.17E-26    |
| RP11-1036E20.9 | CA11     | 0.264753053  | 1.78E-08    |
| RP11-1036E20.9 | PLD3     | 0.137599909  | 0.003869977 |
| RP11-1036E20.9 | LURAP1L  | 0.557785846  | 2.93E-37    |
| RP11-1036E20.9 | CARNS1   | 0.26228746   | 2.44E-08    |
| RP11-1036E20.9 | PDLIM7   | 0.388332609  | 2.99E-17    |
| RP11-1036E20.9 | BCL2L1   | 0.546230093  | 1.65E-35    |
| RP11-1036E20.9 | GGT6     | 0.396184333  | 5.97E-18    |
| RP11-1036E20.9 | DPYSL3   | 0.316358081  | 1.16E-11    |
| RP11-1036E20.9 | FYN      | 0.458398484  | 3.41E-24    |
| RP11-1036E20.9 | TK1      | 0.357939584  | 1.03E-14    |
| RP11-1036E20.9 | AK1      | 0.23952961   | 3.80E-07    |
| RP11-1036E20.9 | HIGD1B   | 0.041718114  | 0.383219793 |
| RP11-1036E20.9 | TMEM59L  | 0.281032948  | 2.06E-09    |
| RP11-1036E20.9 | MEGF9    | 0.495111927  | 1.58E-28    |

|                |          |             |             |
|----------------|----------|-------------|-------------|
| RP11-1036E20.9 | ZFP36L1  | 0.47743443  | 2.24E-26    |
| RP11-1036E20.9 | ADRA1B   | 0.324748447 | 3.06E-12    |
| RP11-1036E20.9 | EPHA4    | 0.510140832 | 1.85E-30    |
| RP11-1036E20.9 | TCERG1L  | 0.305185917 | 6.46E-11    |
| RP11-1036E20.9 | NGFR     | 0.344291542 | 1.16E-13    |
| RP11-1036E20.9 | EBI3     | 0.548139525 | 8.56E-36    |
| RP11-1036E20.9 | S100A10  | 0.474739166 | 4.65E-26    |
| RP11-1036E20.9 | S100B    | 0.543835501 | 3.72E-35    |
| RP11-1036E20.9 | CD44     | 0.226614912 | 1.61E-06    |
| RP11-1036E20.9 | BHLHE41  | 0.596502136 | 1.18E-43    |
| RP11-1036E20.9 | FBXO2    | 0.333414304 | 7.38E-13    |
| RP11-1036E20.9 | SLC30A2  | 0.457161467 | 4.67E-24    |
| RP11-1036E20.9 | FRMD5    | 0.690379737 | 2.00E-63    |
| RP11-1036E20.9 | SAMD11   | 0.307598242 | 4.49E-11    |
| RP11-1036E20.9 | SIPA1L2  | 0.424823829 | 1.15E-20    |
| RP11-1036E20.9 | S100A16  | 0.516742488 | 2.44E-31    |
| RP11-1036E20.9 | PPL      | 0.638503402 | 1.20E-51    |
| RP11-1036E20.9 | ARHGDI B | 0.159872172 | 0.000774386 |
| RP11-1036E20.9 | CDC42EP3 | 0.638949196 | 9.68E-52    |
| RP11-1036E20.9 | RUNX2    | 0.551326404 | 2.84E-36    |
| RP11-1036E20.9 | LAMC2    | 0.594424813 | 2.74E-43    |
| RP11-1036E20.9 | BRINP1   | 0.498387114 | 6.10E-29    |
| RP11-1036E20.9 | GPRC5B   | 0.576576871 | 2.95E-40    |
| RP11-1036E20.9 | AQP5     | 0.146123055 | 0.002145038 |
| RP11-1036E20.9 | PLAG1    | 0.413391707 | 1.50E-19    |
| RP11-1036E20.9 | PTPRU    | 0.513595472 | 6.45E-31    |
| RP11-1036E20.9 | ANGPTL4  | 0.363913865 | 3.41E-15    |
| RP11-1036E20.9 | PALM3    | 0.537801922 | 2.83E-34    |
| RP11-1036E20.9 | ACP5     | 0.387615295 | 3.45E-17    |
| RP11-1036E20.9 | DLG4     | 0.286980631 | 9.06E-10    |
| RP11-1036E20.9 | ETNK2    | 0.522964031 | 3.48E-32    |
| RP11-1036E20.9 | CD109    | 0.54493158  | 2.57E-35    |
| RP11-1036E20.9 | SNX22    | 0.415779986 | 8.86E-20    |
| RP11-1036E20.9 | TMEM98   | 0.526622665 | 1.09E-32    |
| RP11-1036E20.9 | CTHRC1   | 0.461434282 | 1.56E-24    |
| RP11-1036E20.9 | S100A2   | 0.579345264 | 1.03E-40    |
| RP11-1036E20.9 | C11orf80 | 0.672077986 | 5.37E-59    |
| RP11-1036E20.9 | SREBF1   | 0.459101966 | 2.85E-24    |
| RP11-1036E20.9 | PRSS22   | 0.645915786 | 3.43E-53    |
| RP11-1036E20.9 | CMTM3    | 0.440155179 | 3.16E-22    |
| RP11-1036E20.9 | RDH5     | 0.541471975 | 8.28E-35    |
| RP11-1036E20.9 | MYH10    | 0.486965419 | 1.61E-27    |
| RP11-1036E20.9 | EVPL     | 0.468246104 | 2.64E-25    |
| RP11-1036E20.9 | SCD      | 0.472394863 | 8.74E-26    |
| RP11-1036E20.9 | CD151    | 0.459872903 | 2.34E-24    |
| RP11-1036E20.9 | S100A4   | 0.547754021 | 9.77E-36    |
| RP11-1036E20.9 | BNIP1    | 0.479681914 | 1.21E-26    |
| RP11-1036E20.9 | MAP3K6   | 0.588249091 | 3.22E-42    |
| RP11-1036E20.9 | MANEAL   | 0.442439475 | 1.82E-22    |
| RP11-1036E20.9 | CD207    | 0.562203403 | 6.01E-38    |
| RP11-1036E20.9 | CD1A     | 0.589830935 | 1.72E-42    |

|                |          |              |             |
|----------------|----------|--------------|-------------|
| RP11-1036E20.9 | C3       | 0.42991099   | 3.57E-21    |
| RP11-1036E20.9 | NT5E     | 0.499865364  | 3.96E-29    |
| RP11-1036E20.9 | CACNG4   | 0.520414968  | 7.77E-32    |
| RP11-1036E20.9 | FHOD1    | 0.58235723   | 3.22E-41    |
| RP11-1036E20.9 | LEMD1    | 0.571361824  | 2.09E-39    |
| RP11-1036E20.9 | ATP11A   | 0.302350141  | 9.87E-11    |
| RP11-1036E20.9 | PPAP2C   | 0.267691607  | 1.22E-08    |
| RP11-1036E20.9 | DRAM1    | 0.563099628  | 4.35E-38    |
| RP11-1036E20.9 | CDA      | 0.17021091   | 0.000340555 |
| RP11-1036E20.9 | CCND2    | 0.21411104   | 6.01E-06    |
| RP11-1036E20.9 | LCN6     | 0.329418588  | 1.43E-12    |
| RP11-1036E20.9 | CDH4     | 0.429043447  | 4.36E-21    |
| RP11-1036E20.9 | MMP11    | 0.578755412  | 1.29E-40    |
| RP11-1036E20.9 | B3GAT1   | 0.424101834  | 1.36E-20    |
| RP11-1036E20.9 | SPP1     | 0.382271793  | 1.01E-16    |
| RP11-1036E20.9 | HLA-DQB1 | 0.419217674  | 4.11E-20    |
| RP11-1036E20.9 | SDC3     | 0.395304731  | 7.17E-18    |
| RP11-1036E20.9 | CX3CL1   | 0.417571037  | 5.95E-20    |
| RP11-1036E20.9 | SDK1     | 0.399084584  | 3.26E-18    |
| RP11-1036E20.9 | DOCK9    | 0.594586604  | 2.57E-43    |
| RP11-1036E20.9 | CSF2     | 0.672444817  | 4.41E-59    |
| RP11-1036E20.9 | GRHL3    | 0.616703177  | 2.39E-47    |
| RP11-1036E20.9 | TMEM92   | 0.706021974  | 1.77E-67    |
| RP11-1036E20.9 | BASP1    | 0.60623109   | 2.12E-45    |
| RP11-1036E20.9 | HRH1     | 0.596259627  | 1.31E-43    |
| RP11-1036E20.9 | ESM1     | -0.024116369 | 0.614312891 |
| RP11-1036E20.9 | B4GALNT3 | 0.509645387  | 2.15E-30    |
| RP11-1036E20.9 | LMO3     | 0.405408408  | 8.52E-19    |
| RP11-1036E20.9 | C9orf16  | 0.465745684  | 5.09E-25    |
| RP11-1036E20.9 | SEMA3F   | 0.162473029  | 0.000632655 |
| RP11-1036E20.9 | PLA2G12B | 0.346329093  | 8.14E-14    |
| RP11-1036E20.9 | KLK6     | 0.546611108  | 1.45E-35    |
| RP11-1036E20.9 | ST3GAL5  | 0.33714784   | 3.94E-13    |
| RP11-1036E20.9 | FAM132B  | 0.201961533  | 2.01E-05    |
| RP11-1036E20.9 | CDKN1A   | 0.182768973  | 0.000117635 |
| RP11-1036E20.9 | E2F1     | 0.460660721  | 1.91E-24    |
| RP11-1036E20.9 | B3GNT8   | 0.345290802  | 9.75E-14    |
| RP11-1036E20.9 | MTMR11   | 0.641778873  | 2.52E-52    |
| RP11-1036E20.9 | MYO1G    | 0.577799206  | 1.85E-40    |
| RP11-1036E20.9 | TMSB10   | 0.496130693  | 1.18E-28    |
| RP11-1036E20.9 | UNC5CL   | 0.720706513  | 1.55E-71    |
| RP11-1036E20.9 | ABR      | 0.470242567  | 1.55E-25    |
| RP11-1036E20.9 | PLP2     | 0.464811041  | 6.50E-25    |
| RP11-1036E20.9 | SRCIN1   | 0.477749713  | 2.06E-26    |
| RP11-1036E20.9 | PDE9A    | 0.672146646  | 5.18E-59    |
| RP11-1036E20.9 | TREM2    | 0.326065544  | 2.48E-12    |
| RP11-1036E20.9 | KDEL3    | 0.398741638  | 3.50E-18    |
| RP11-1036E20.9 | PC       | 0.549296179  | 5.74E-36    |
| RP11-1036E20.9 | C2CD4A   | 0.742238056  | 5.54E-78    |
| RP11-1036E20.9 | PELI1    | 0.562396501  | 5.61E-38    |
| RP11-1036E20.9 | SSX1     | 0.399144449  | 3.22E-18    |

|                |          |             |            |
|----------------|----------|-------------|------------|
| RP11-1036E20.9 | MROH6    | 0.567952083 | 7.40E-39   |
| RP11-1036E20.9 | ESPN     | 0.50908724  | 2.54E-30   |
| RP11-1036E20.9 | BMP1     | 0.446308629 | 7.06E-23   |
| RP11-1036E20.9 | TM4SF4   | 0.486046796 | 2.08E-27   |
| RP11-1036E20.9 | CORO2A   | 0.559981409 | 1.34E-37   |
| RP11-1036E20.9 | CD164L2  | 0.488831424 | 9.49E-28   |
| RP11-1036E20.9 | CTSS     | 0.477708148 | 2.08E-26   |
| RP11-1036E20.9 | CLU      | 0.53918392  | 1.78E-34   |
| RP11-1036E20.9 | TMSB4X   | 0.463365845 | 9.47E-25   |
| RP11-1036E20.9 | WNT10A   | 0.601419832 | 1.58E-44   |
| RP11-1036E20.9 | NAPSA    | 0.437842723 | 5.49E-22   |
| RP11-1036E20.9 | PLEKHA4  | 0.58815291  | 3.35E-42   |
| RP11-1036E20.9 | SFTPA1   | 0.103475424 | 0.03018218 |
| RP11-1036E20.9 | Clorf116 | 0.662840009 | 7.03E-57   |
| RP11-1036E20.9 | TM4SF1   | 0.530140858 | 3.49E-33   |
| RP11-1036E20.9 | SEL1L3   | 0.537303498 | 3.33E-34   |
| RP11-1036E20.9 | VASN     | 0.564183437 | 2.94E-38   |
| RP11-1036E20.9 | NPTXR    | 0.605205374 | 3.26E-45   |
| RP11-1036E20.9 | PDE4C    | 0.632904624 | 1.64E-50   |
| RP11-1036E20.9 | CDC42EP1 | 0.574399963 | 6.71E-40   |
| RP11-1036E20.9 | ENDOD1   | 0.586406688 | 6.66E-42   |
| RP11-1036E20.9 | RYR1     | 0.397155717 | 4.88E-18   |
| RP11-1036E20.9 | IL1RAP   | 0.538882397 | 1.97E-34   |
| RP11-1036E20.9 | SLC35F2  | 0.615024359 | 4.96E-47   |
| RP11-1036E20.9 | ISYNA1   | 0.347446148 | 6.69E-14   |
| RP11-1036E20.9 | HLA-G    | 0.553815617 | 1.19E-36   |
| RP11-1036E20.9 | CDKN2B   | 0.552386735 | 1.96E-36   |
| RP11-1036E20.9 | ALDH1A3  | 0.466165801 | 4.56E-25   |
| RP11-1036E20.9 | CLIP3    | 0.385523147 | 5.26E-17   |
| RP11-1036E20.9 | ULBP2    | 0.427788981 | 5.83E-21   |
| RP11-1036E20.9 | ETHE1    | 0.644664583 | 6.28E-53   |
| RP11-1036E20.9 | XPR1     | 0.451477714 | 1.96E-23   |
| RP11-1036E20.9 | SPTBN2   | 0.691893452 | 8.34E-64   |
| RP11-1036E20.9 | IVL      | 0.648674319 | 8.91E-54   |
| RP11-1036E20.9 | MARCO    | 0.508630239 | 2.92E-30   |
| RP11-1036E20.9 | PLXND1   | 0.28476698  | 1.23E-09   |
| RP11-1036E20.9 | EMILIN2  | 0.436796649 | 7.05E-22   |
| RP11-1036E20.9 | PLAUR    | 0.519149848 | 1.15E-31   |
| RP11-1036E20.9 | CDC42EP5 | 0.527350476 | 8.60E-33   |
| RP11-1036E20.9 | TRPC5    | 0.359911211 | 7.15E-15   |
| RP11-1036E20.9 | TMEM100  | 0.409154995 | 3.80E-19   |
| RP11-1036E20.9 | QSOX1    | 0.576700219 | 2.81E-40   |
| RP11-1036E20.9 | ARHGAP23 | 0.48629194  | 1.94E-27   |
| RP11-1036E20.9 | MDF1     | 0.303194703 | 8.71E-11   |
| RP11-1036E20.9 | FSTL3    | 0.578641498 | 1.34E-40   |
| RP11-1036E20.9 | INF2     | 0.58108943  | 5.26E-41   |
| RP11-1036E20.9 | TGFBR1   | 0.640978713 | 3.69E-52   |
| RP11-1036E20.9 | TGFBI    | 0.381297287 | 1.22E-16   |
| RP11-1036E20.9 | ERBB3    | 0.717477289 | 1.27E-70   |
| RP11-1036E20.9 | CCL18    | 0.403127232 | 1.39E-18   |
| RP11-1036E20.9 | CCL17    | 0.574201557 | 7.23E-40   |

|                |           |             |             |
|----------------|-----------|-------------|-------------|
| RP11-1036E20.9 | C16orf45  | 0.302794942 | 9.24E-11    |
| RP11-1036E20.9 | PRDM1     | 0.303355927 | 8.50E-11    |
| RP11-1036E20.9 | TRIM47    | 0.540947449 | 9.87E-35    |
| RP11-1036E20.9 | CNFN      | 0.465169378 | 5.92E-25    |
| RP11-1036E20.9 | ARMCX3    | 0.515456743 | 3.63E-31    |
| RP11-1036E20.9 | RAMP1     | 0.372167478 | 7.20E-16    |
| RP11-1036E20.9 | GABRD     | 0.067571484 | 0.15755018  |
| RP11-1036E20.9 | COL13A1   | 0.307603562 | 4.49E-11    |
| RP11-1036E20.9 | S100A5    | 0.506102866 | 6.24E-30    |
| RP11-1036E20.9 | MISP      | 0.538527393 | 2.22E-34    |
| RP11-1036E20.9 | HES6      | 0.228871617 | 1.26E-06    |
| RP11-1036E20.9 | PSD3      | 0.553549843 | 1.31E-36    |
| RP11-1036E20.9 | DOK7      | 0.534101865 | 9.60E-34    |
| RP11-1036E20.9 | ZMAT3     | 0.470020698 | 1.65E-25    |
| RP11-1036E20.9 | MFAP2     | 0.411624702 | 2.22E-19    |
| RP11-1036E20.9 | TMEM79    | 0.626193523 | 3.53E-49    |
| RP11-1036E20.9 | SLC1A5    | 0.458853073 | 3.03E-24    |
| RP11-1036E20.9 | BBC3      | 0.431244259 | 2.61E-21    |
| RP11-1036E20.9 | HLA-DQB2  | 0.470548629 | 1.43E-25    |
| RP11-1036E20.9 | C1QL1     | 0.482221203 | 6.03E-27    |
| RP11-1036E20.9 | TMEM215   | 0.164475516 | 0.000540354 |
| RP11-1036E20.9 | PNP       | 0.523165188 | 3.26E-32    |
| RP11-1036E20.9 | ARNTL     | 0.585978768 | 7.87E-42    |
| RP11-1036E20.9 | CLDN2     | 0.432212432 | 2.08E-21    |
| RP11-1036E20.9 | MVP       | 0.56986343  | 3.65E-39    |
| RP11-1036E20.9 | LGALS1    | 0.406279427 | 7.06E-19    |
| RP11-1036E20.9 | BIRC7     | 0.546017974 | 1.77E-35    |
| RP11-1036E20.9 | COL8A1    | 0.57790099  | 1.78E-40    |
| RP11-1036E20.9 | PERP      | 0.683429603 | 1.05E-61    |
| RP11-1036E20.9 | GJA4      | 0.201528151 | 2.10E-05    |
| RP11-1036E20.9 | IGFL2     | 0.540802228 | 1.04E-34    |
| RP11-1036E20.9 | DAPK2     | 0.610111451 | 4.10E-46    |
| RP11-1036E20.9 | MAMLD1    | 0.564812585 | 2.33E-38    |
| RP11-1036E20.9 | ETV5      | 0.204526215 | 1.57E-05    |
| RP11-1036E20.9 | RUNX1     | 0.667966252 | 4.81E-58    |
| RP11-1036E20.9 | LONRF2    | 0.371426474 | 8.29E-16    |
| RP11-1036E20.9 | SPOCK1    | 0.147297654 | 0.001972618 |
| RP11-1036E20.9 | XKRX      | 0.455441843 | 7.23E-24    |
| RP11-1036E20.9 | TGFB1     | 0.21939567  | 3.48E-06    |
| RP11-1036E20.9 | ERP27     | 0.335798399 | 4.95E-13    |
| RP11-1036E20.9 | TNFRSF10C | 0.358122087 | 9.92E-15    |
| RP11-1036E20.9 | PALM      | 0.584408877 | 1.45E-41    |
| RP11-1036E20.9 | TSC22D1   | 0.359814544 | 7.28E-15    |
| RP11-1036E20.9 | TGM2      | 0.534068245 | 9.70E-34    |
| RP11-1036E20.9 | UBE2QL1   | 0.366573452 | 2.08E-15    |
| RP11-1036E20.9 | ECE1      | 0.471358152 | 1.15E-25    |
| RP11-1036E20.9 | COL8A2    | 0.612305383 | 1.60E-46    |
| RP11-1036E20.9 | HIST3H2A  | 0.485071875 | 2.73E-27    |
| RP11-1036E20.9 | TNFRSF21  | 0.521893203 | 4.88E-32    |
| RP11-1036E20.9 | SOX4      | 0.557954092 | 2.76E-37    |
| RP11-1036E20.9 | ELF3      | 0.684346088 | 6.28E-62    |

|                |            |             |             |
|----------------|------------|-------------|-------------|
| RP11-1036E20.9 | TPD52L1    | 0.583305066 | 2.23E-41    |
| RP11-1036E20.9 | INHBB      | 0.446893375 | 6.12E-23    |
| RP11-1036E20.9 | HPN        | 0.406216157 | 7.16E-19    |
| RP11-1036E20.9 | MMP7       | 0.633905284 | 1.03E-50    |
| RP11-1036E20.9 | RAB27A     | 0.541526946 | 8.13E-35    |
| RP11-1036E20.9 | IGF2BP2    | 0.559925446 | 1.36E-37    |
| RP11-1036E20.9 | ITGB4      | 0.546514167 | 1.49E-35    |
| RP11-1036E20.9 | PPP1R1B    | 0.49894817  | 5.18E-29    |
| RP11-1036E20.9 | NPDC1      | 0.254940331 | 6.09E-08    |
| RP11-1036E20.9 | CCL13      | 0.571899427 | 1.71E-39    |
| RP11-1036E20.9 | SPINT1     | 0.648951869 | 7.77E-54    |
| RP11-1036E20.9 | HEY2       | 0.396506993 | 5.58E-18    |
| RP11-1036E20.9 | CST2       | 0.592411452 | 6.16E-43    |
| RP11-1036E20.9 | ADM        | 0.335331751 | 5.36E-13    |
| RP11-1036E20.9 | VSTM2L     | 0.458839171 | 3.04E-24    |
| RP11-1036E20.9 | FAM84A     | 0.500403154 | 3.38E-29    |
| RP11-1036E20.9 | P4HA2      | 0.426623036 | 7.64E-21    |
| RP11-1036E20.9 | LPL        | 0.294677728 | 3.04E-10    |
| RP11-1036E20.9 | TMEM173    | 0.505434635 | 7.62E-30    |
| RP11-1036E20.9 | DHRS3      | 0.549591389 | 5.18E-36    |
| RP11-1036E20.9 | SCN1B      | 0.470846464 | 1.32E-25    |
| RP11-1036E20.9 | GLT1D1     | 0.198497176 | 2.80E-05    |
| RP11-1036E20.9 | PHYHIP     | 0.506422121 | 5.67E-30    |
| RP11-1036E20.9 | BHLHE40    | 0.578292736 | 1.54E-40    |
| RP11-1036E20.9 | BID        | 0.574074395 | 7.58E-40    |
| RP11-1036E20.9 | POSTN      | 0.447394069 | 5.41E-23    |
| RP11-1036E20.9 | ITGA3      | 0.69088341  | 1.50E-63    |
| RP11-1036E20.9 | RSPO4      | 0.546451111 | 1.53E-35    |
| RP11-1036E20.9 | ADAMTS9    | 0.251834028 | 8.90E-08    |
| RP11-1036E20.9 | ABTB2      | 0.684779895 | 4.92E-62    |
| RP11-1036E20.9 | KCNQ3      | 0.699206534 | 1.11E-65    |
| RP11-1036E20.9 | ANXA1      | 0.502993158 | 1.58E-29    |
| RP11-1036E20.9 | S100A11    | 0.583039079 | 2.48E-41    |
| RP11-1036E20.9 | CEACAM6    | 0.611446825 | 2.32E-46    |
| RP11-1036E20.9 | IER5L      | 0.527114847 | 9.27E-33    |
| RP11-1036E20.9 | KRT80      | 0.629235847 | 8.86E-50    |
| RP11-1036E20.9 | CDH6       | 0.516737098 | 2.45E-31    |
| RP11-1036E20.9 | UNC5B      | 0.388299626 | 3.01E-17    |
| RP11-1036E20.9 | PLEKHN1    | 0.605493845 | 2.89E-45    |
| RP11-1036E20.9 | SYTL1      | 0.398170085 | 3.95E-18    |
| RP11-1036E20.9 | TMEM163    | 0.519878085 | 9.19E-32    |
| RP11-1036E20.9 | C4orf48    | 0.148942943 | 0.001752378 |
| RP11-1036E20.9 | B3GNT7     | 0.379148751 | 1.86E-16    |
| RP11-1036E20.9 | BAIAP3     | 0.506304519 | 5.87E-30    |
| RP11-1036E20.9 | PHLDA2     | 0.443790973 | 1.31E-22    |
| RP11-1036E20.9 | GAP43      | 0.483889755 | 3.79E-27    |
| RP11-1036E20.9 | S100A1     | 0.527016042 | 9.57E-33    |
| RP11-1036E20.9 | PTPRE      | 0.677786493 | 2.42E-60    |
| RP11-1036E20.9 | CCND1      | 0.42025552  | 3.26E-20    |
| RP11-1036E20.9 | ST6GALNAC5 | 0.697787722 | 2.60E-65    |
| RP11-1036E20.9 | KRT17      | 0.357872413 | 1.04E-14    |

|                |         |              |             |
|----------------|---------|--------------|-------------|
| RP11-1036E20.9 | HPCAL4  | 0.408175311  | 4.69E-19    |
| RP11-1036E20.9 | GABBR2  | 0.443960637  | 1.25E-22    |
| RP11-1036E20.9 | DIRAS3  | 0.320443429  | 6.11E-12    |
| RP11-1036E20.9 | SERINC2 | 0.419719077  | 3.67E-20    |
| RP11-1036E20.9 | PTCHD4  | 0.337954951  | 3.44E-13    |
| RP11-1036E20.9 | EPS8    | 0.461455987  | 1.55E-24    |
| RP11-1036E20.9 | LY6E    | 0.538715144  | 2.08E-34    |
| RP11-1036E20.9 | UPP1    | 0.574699074  | 6.00E-40    |
| RP11-1036E20.9 | AHNAK2  | 0.692873844  | 4.71E-64    |
| RP11-1036E20.9 | PLXNC1  | 0.541039587  | 9.57E-35    |
| RP11-1036E20.9 | TNC     | 0.505236599  | 8.08E-30    |
| RP11-1036E20.9 | DUSP4   | 0.407878399  | 5.00E-19    |
| RP11-1036E20.9 | NRCAM   | 0.445363701  | 8.91E-23    |
| RP11-1036E20.9 | NRP2    | 0.536375097  | 4.54E-34    |
| RP11-1036E20.9 | CTSC    | 0.606373163  | 2.00E-45    |
| RP11-1036E20.9 | AMIGO2  | 0.384459412  | 6.51E-17    |
| RP11-1036E20.9 | NAB2    | 0.466068344  | 4.68E-25    |
| RP11-1036E20.9 | TBC1D2  | 0.665361282  | 1.89E-57    |
| RP11-1036E20.9 | PHLDA3  | 0.486880374  | 1.64E-27    |
| RP11-1036E20.9 | PTP4A3  | 0.424942707  | 1.12E-20    |
| RP11-1036E20.9 | CRABP2  | 0.380094884  | 1.55E-16    |
| RP11-1036E20.9 | GOS2    | 0.336480177  | 4.42E-13    |
| RP11-1036E20.9 | S100A6  | 0.629233648  | 8.87E-50    |
| RP11-1036E20.9 | FOXQ1   | 0.612442561  | 1.51E-46    |
| RP11-1036E20.9 | LRG1    | 0.573073929  | 1.10E-39    |
| RP11-1036E20.9 | LAMP5   | 0.480612372  | 9.39E-27    |
| RP11-1036E20.9 | ALDH3B1 | 0.602317677  | 1.09E-44    |
| RP11-1036E20.9 | CDH2    | -0.032922597 | 0.491437152 |
| RP11-1036E20.9 | SCG5    | 0.207721677  | 1.15E-05    |
| RP11-1036E20.9 | ZCCHC16 | 0.359090214  | 8.31E-15    |
| RP11-1036E20.9 | GRB7    | 0.680463599  | 5.51E-61    |
| RP11-1036E20.9 | TIAM1   | 0.369562437  | 1.18E-15    |
| RP11-1036E20.9 | FXYS5   | 0.332022447  | 9.31E-13    |
| RP11-1036E20.9 | CLDN9   | 0.452357741  | 1.57E-23    |
| RP11-1036E20.9 | FAM43A  | 0.675153434  | 1.02E-59    |
| RP11-1036E20.9 | CHST2   | 0.403719709  | 1.22E-18    |
| RP11-1036E20.9 | HMGA2   | 0.41336681   | 1.51E-19    |
| RP11-1036E20.9 | GALNT7  | 0.5077417    | 3.82E-30    |
| RP11-1036E20.9 | CBLN1   | 0.527199325  | 9.02E-33    |
| RP11-1036E20.9 | STRA6   | 0.584074017  | 1.66E-41    |
| RP11-1036E20.9 | MUC21   | 0.687101718  | 1.32E-62    |
| RP11-1036E20.9 | PRR36   | 0.512186308  | 9.92E-31    |
| RP11-1036E20.9 | NFE2L3  | 0.506622853  | 5.34E-30    |
| RP11-1036E20.9 | NR1D1   | 0.439821879  | 3.42E-22    |
| RP11-1036E20.9 | MUC1    | 0.66803016   | 4.65E-58    |
| RP11-1036E20.9 | NAT8L   | 0.191676701  | 5.30E-05    |
| RP11-1036E20.9 | APOC1   | 0.209423001  | 9.66E-06    |
| RP11-1036E20.9 | EVA1A   | 0.608767401  | 7.26E-46    |
| RP11-1036E20.9 | ENTPD1  | 0.322103188  | 4.69E-12    |
| RP11-1036E20.9 | COL1A1  | 0.529865437  | 3.82E-33    |
| RP11-1036E20.9 | FNDC4   | 0.456690351  | 5.27E-24    |



|                |           |             |             |
|----------------|-----------|-------------|-------------|
| RP11-1036E20.9 | FRMD3     | 0.237722601 | 4.68E-07    |
| RP11-1036E20.9 | SHROOM4   | 0.585913725 | 8.08E-42    |
| RP11-1036E20.9 | NELL2     | 0.33591522  | 4.86E-13    |
| RP11-1036E20.9 | EPHB3     | 0.654837062 | 4.17E-55    |
| RP11-1036E20.9 | TMC6      | 0.554521086 | 9.29E-37    |
| RP11-1036E20.9 | NOD1      | 0.628557048 | 1.21E-49    |
| RP11-1036E20.9 | GGCT      | 0.655271295 | 3.35E-55    |
| RP11-1036E20.9 | ICAM1     | 0.637906314 | 1.58E-51    |
| RP11-1036E20.9 | PRSS23    | 0.486785044 | 1.69E-27    |
| RP11-1036E20.9 | CFI       | 0.563863969 | 3.30E-38    |
| RP11-1036E20.9 | CD55      | 0.647035131 | 1.99E-53    |
| RP11-1036E20.9 | RASD2     | 0.509565804 | 2.20E-30    |
| RP11-1036E20.9 | KLK11     | 0.526999899 | 9.62E-33    |
| RP11-1036E20.9 | ICAM5     | 0.595023958 | 2.15E-43    |
| RP11-1036E20.9 | ADORA1    | 0.479088727 | 1.43E-26    |
| RP11-1036E20.9 | ITGA2     | 0.591237934 | 9.85E-43    |
| RP11-1036E20.9 | ABCC3     | 0.492827134 | 3.04E-28    |
| RP11-1036E20.9 | MFGE8     | 0.612605913 | 1.41E-46    |
| RP11-1036E20.9 | STK32A    | 0.321138897 | 5.47E-12    |
| RP11-1036E20.9 | CYSLTR2   | 0.407899181 | 4.98E-19    |
| RP11-1036E20.9 | LAD1      | 0.691747691 | 9.07E-64    |
| RP11-1036E20.9 | MGAT3     | 0.560348471 | 1.17E-37    |
| RP11-1036E20.9 | IGFBP6    | 0.481625322 | 7.10E-27    |
| RP11-1036E20.9 | CYP2S1    | 0.610612429 | 3.31E-46    |
| RP11-1036E20.9 | KCNJ2     | 0.469651366 | 1.82E-25    |
| RP11-1036E20.9 | FAM20A    | 0.513114567 | 7.47E-31    |
| RP11-1036E20.9 | TGFA      | 0.421268185 | 2.59E-20    |
| RP11-1036E20.9 | MXRA8     | 0.599092141 | 4.11E-44    |
| RP11-1036E20.9 | C8orf4    | 0.413479234 | 1.47E-19    |
| RP11-1036E20.9 | CLDN10    | 0.632229726 | 2.24E-50    |
| RP11-1036E20.9 | PDE5A     | 0.643247263 | 1.24E-52    |
| RP11-1036E20.9 | APOE      | 0.21159771  | 7.77E-06    |
| RP11-1036E20.9 | SPOCK2    | 0.561069899 | 9.05E-38    |
| RP11-1036E20.9 | TENM1     | 0.336585011 | 4.34E-13    |
| RP11-1036E20.9 | SLIT1     | 0.112031818 | 0.018872954 |
| RP11-1036E20.9 | CXCL14    | 0.412214767 | 1.95E-19    |
| RP11-1036E20.9 | ECM1      | 0.161257291 | 0.000695612 |
| RP11-1036E20.9 | DUSP5     | 0.609398251 | 5.56E-46    |
| RP11-1036E20.9 | SEZ6L2    | 0.428155263 | 5.36E-21    |
| RP11-1036E20.9 | THRSP     | 0.270537242 | 8.41E-09    |
| RP11-1036E20.9 | C19orf33  | 0.573968071 | 7.89E-40    |
| RP11-1036E20.9 | MPZL2     | 0.593010897 | 4.84E-43    |
| RP11-1036E20.9 | CTSH      | 0.575968151 | 3.71E-40    |
| RP11-1036E20.9 | CYP1B1    | 0.596597821 | 1.14E-43    |
| RP11-1036E20.9 | ALOX5     | 0.65547841  | 3.02E-55    |
| RP11-1036E20.9 | SYTL5     | 0.53254086  | 1.60E-33    |
| RP11-1036E20.9 | TNFRSF12A | 0.473190625 | 7.06E-26    |
| RP11-1036E20.9 | DUSP6     | 0.462540292 | 1.17E-24    |
| RP11-1036E20.9 | ALOX15B   | 0.660414703 | 2.45E-56    |
| RP11-1036E20.9 | SDC4      | 0.563017562 | 4.48E-38    |
| RP11-1036E20.9 | MDK       | 0.476489502 | 2.90E-26    |

|                |          |             |             |
|----------------|----------|-------------|-------------|
| RP11-1036E20.9 | KRT19    | 0.641999181 | 2.27E-52    |
| RP11-1036E20.9 | MET      | 0.700895942 | 4.03E-66    |
| RP11-1036E20.9 | TESC     | 0.275978982 | 4.09E-09    |
| RP11-1036E20.9 | CXCL17   | 0.772657139 | 2.83E-88    |
| RP11-1036E20.9 | NPC2     | 0.465065963 | 6.08E-25    |
| RP11-1036E20.9 | COMP     | 0.51251748  | 8.97E-31    |
| RP11-1036E20.9 | TUSC3    | 0.407884995 | 5.00E-19    |
| RP11-1036E20.9 | TMPRSS4  | 0.700114649 | 6.45E-66    |
| RP11-1036E20.9 | LGALS3   | 0.673794347 | 2.13E-59    |
| RP11-1036E20.9 | CRLF1    | 0.351264587 | 3.41E-14    |
| RP11-1036E20.9 | CTXN1    | 0.489328377 | 8.24E-28    |
| RP11-1036E20.9 | PCSK1N   | 0.183887254 | 0.000106636 |
| RP11-1036E20.9 | NMU      | 0.633131973 | 1.48E-50    |
| RP11-1036E20.9 | GALE     | 0.566360416 | 1.33E-38    |
| RP11-1036E20.9 | PCSK2    | 0.183752629 | 0.000107907 |
| RP11-1036E20.9 | GJB3     | 0.548378133 | 7.88E-36    |
| RP11-1036E20.9 | SLPI     | 0.588642823 | 2.76E-42    |
| RP11-1036E20.9 | AGR2     | 0.24874872  | 1.29E-07    |
| RP11-1036E20.9 | MRC2     | 0.436633511 | 7.33E-22    |
| RP11-1036E20.9 | GOLT1A   | 0.415643659 | 9.13E-20    |
| RP11-1036E20.9 | SLC27A6  | 0.625845244 | 4.13E-49    |
| RP11-1036E20.9 | KCNN4    | 0.605350709 | 3.07E-45    |
| RP11-1036E20.9 | ETV4     | 0.390968554 | 1.75E-17    |
| RP11-1036E20.9 | SYT12    | 0.6667342   | 9.20E-58    |
| RP11-1036E20.9 | PVRL4    | 0.712540357 | 3.00E-69    |
| RP11-1036E20.9 | PLCD3    | 0.622401186 | 1.93E-48    |
| RP11-1036E20.9 | PLAU     | 0.563018839 | 4.48E-38    |
| RP11-1036E20.9 | LRRK2    | 0.256346161 | 5.12E-08    |
| RP11-1036E20.9 | SFN      | 0.619462987 | 7.11E-48    |
| RP11-1036E20.9 | LPAR5    | 0.592261452 | 6.54E-43    |
| RP11-1036E20.9 | NGEF     | 0.661119888 | 1.71E-56    |
| RP11-1036E20.9 | DTX4     | 0.782362092 | 6.68E-92    |
| RP11-1036E20.9 | CST6     | 0.597039714 | 9.51E-44    |
| RP11-1036E20.9 | QPCT     | 0.462694635 | 1.13E-24    |
| RP11-1036E20.9 | TIMP1    | 0.510108772 | 1.87E-30    |
| RP11-1036E20.9 | CAMK2N1  | 0.560120928 | 1.27E-37    |
| RP11-1036E20.9 | KLHDC8A  | 0.151133825 | 0.001494044 |
| RP11-1036E20.9 | PDLIM4   | 0.659418564 | 4.09E-56    |
| RP11-1036E20.9 | SCEL     | 0.612742382 | 1.33E-46    |
| RP11-1036E20.9 | LCN2     | 0.679905381 | 7.51E-61    |
| RP11-1036E20.9 | PROS1    | 0.706408115 | 1.39E-67    |
| RP11-1036E20.9 | GABRB2   | 0.640625482 | 4.37E-52    |
| RP11-1036E20.9 | TMPRSS6  | 0.727199717 | 2.04E-73    |
| RP11-1036E20.9 | KLK7     | 0.622161898 | 2.15E-48    |
| RP11-1036E20.9 | PDZK1IP1 | 0.630571031 | 4.81E-50    |
| RP11-1036E20.9 | CDH3     | 0.435453734 | 9.70E-22    |
| RP11-1036E20.9 | LRP4     | 0.26731426  | 1.28E-08    |
| RP11-1036E20.9 | IGSF1    | 0.293916154 | 3.39E-10    |
| RP11-1036E20.9 | B3GNT3   | 0.662786527 | 7.22E-57    |
| RP11-1036E20.9 | CLDN1    | 0.533891487 | 1.03E-33    |
| RP11-1036E20.9 | GDF15    | 0.587393748 | 4.52E-42    |

|                |           |              |          |
|----------------|-----------|--------------|----------|
| RP11-1036E20.9 | ARHGAP36  | 0.309937977  | 3.15E-11 |
| RP11-1036E20.9 | LAMB3     | 0.578121653  | 1.64E-40 |
| RP11-1036E20.9 | KLK10     | 0.614591949  | 5.98E-47 |
| RP11-1036E20.9 | DPP4      | 0.628062241  | 1.51E-49 |
| RP11-1036E20.9 | METTL7B   | 0.423515527  | 1.56E-20 |
| RP11-1036E20.9 | LIPH      | 0.629319189  | 8.53E-50 |
| RP11-1036E20.9 | CLDN16    | 0.6208713    | 3.82E-48 |
| RP11-1036E20.9 | CHI3L1    | 0.649607615  | 5.63E-54 |
| RP11-1036E20.9 | SLC22A31  | 0.554830998  | 8.33E-37 |
| RP11-1036E20.9 | TACSTD2   | 0.692185399  | 7.03E-64 |
| RP11-1036E20.9 | SFTPB     | 0.746010674  | 3.53E-79 |
| RP11-1036E20.9 | RXRG      | 0.387947459  | 3.23E-17 |
| RP11-1036E20.9 | DCSTAMP   | 0.712447685  | 3.18E-69 |
| RP11-1036E20.9 | CITED1    | 0.521773899  | 5.07E-32 |
| RP11-1036E20.9 | SERPINA1  | 0.668239261  | 4.16E-58 |
| RP11-1036E20.9 | PRR15     | 0.379865071  | 1.62E-16 |
| RP11-1036E20.9 | SLC34A2   | 0.774592788  | 5.54E-89 |
| RP11-1036E20.9 | FN1       | 0.72610988   | 4.26E-73 |
| RP11-1036E20.9 | ZCCHC12   | 0.271809015  | 7.12E-09 |
| RP11-44N11.2   | TFF3      | -0.319748835 | 8.92E-12 |
| RP11-44N11.2   | CCL21     | -0.265284321 | 1.66E-08 |
| RP11-44N11.2   | TPO       | -0.43310507  | 0        |
| RP11-44N11.2   | MT1G      | -0.388692886 | 0        |
| RP11-44N11.2   | DIO1      | -0.334219626 | 8.73E-13 |
| RP11-44N11.2   | DPT       | -0.264260824 | 1.89E-08 |
| RP11-44N11.2   | CDH16     | -0.432330214 | 0        |
| RP11-44N11.2   | CRABP1    | -0.476412965 | 2.96E-26 |
| RP11-44N11.2   | SLC26A7   | -0.502174505 | 0        |
| RP11-44N11.2   | MT1H      | -0.408092575 | 4.78E-19 |
| RP11-44N11.2   | SLC26A4   | -0.478123041 | 0        |
| RP11-44N11.2   | SLC5A8    | -0.458987955 | 2.93E-24 |
| RP11-44N11.2   | PKHD1L1   | -0.391934712 | 1.43E-17 |
| RP11-44N11.2   | TFCP2L1   | -0.530236272 | 0        |
| RP11-44N11.2   | WSCD2     | -0.386984188 | 3.92E-17 |
| RP11-44N11.2   | IPCEF1    | -0.419745147 | 0        |
| RP11-44N11.2   | SLC5A5    | -0.307458254 | 4.59E-11 |
| RP11-44N11.2   | MT1F      | -0.332881677 | 1.09E-12 |
| RP11-44N11.2   | FOSB      | -0.200285093 | 2.46E-05 |
| RP11-44N11.2   | SEMA3D    | -0.398655895 | 3.56E-18 |
| RP11-44N11.2   | BMP8A     | -0.38269048  | 8.58E-18 |
| RP11-44N11.2   | MATN2     | -0.542996933 | 0        |
| RP11-44N11.2   | PLA2R1    | -0.384459189 | 0        |
| RP11-44N11.2   | COL23A1   | -0.509427489 | 0        |
| RP11-44N11.2   | HGD       | -0.46330872  | 0        |
| RP11-44N11.2   | TCEAL2    | -0.355173651 | 2.23E-14 |
| RP11-44N11.2   | CHRD1     | -0.236816885 | 5.19E-07 |
| RP11-44N11.2   | TNFRSF11B | -0.406444228 | 0        |
| RP11-44N11.2   | FAM167A   | -0.445435681 | 0        |
| RP11-44N11.2   | KIT       | -0.365504642 | 2.91E-15 |
| RP11-44N11.2   | SLC4A4    | -0.572271408 | 0        |
| RP11-44N11.2   | SMOC2     | -0.229115475 | 1.31E-06 |

|              |            |              |             |
|--------------|------------|--------------|-------------|
| RP11-44N11.2 | FHL1       | -0.410747992 | 0           |
| RP11-44N11.2 | OTOS       | -0.331730668 | 1.32E-12    |
| RP11-44N11.2 | IGFBPL1    | -0.510183978 | 1.82E-30    |
| RP11-44N11.2 | HBB        | -0.298332279 | 2.19E-10    |
| RP11-44N11.2 | BEX1       | -0.357775795 | 1.36E-14    |
| RP11-44N11.2 | FABP4      | -0.414440781 | 1.19E-19    |
| RP11-44N11.2 | LMOD1      | -0.42081006  | 0           |
| RP11-44N11.2 | SOD3       | -0.363838198 | 4.11E-15    |
| RP11-44N11.2 | TMEM171    | -0.397726776 | 0           |
| RP11-44N11.2 | PI16       | -0.197045107 | 3.33E-05    |
| RP11-44N11.2 | ZMAT4      | -0.389149968 | 2.53E-17    |
| RP11-44N11.2 | MFAP4      | -0.23229674  | 9.27E-07    |
| RP11-44N11.2 | CWH43      | -0.481007812 | 8.42E-27    |
| RP11-44N11.2 | SPX        | -0.524006218 | 0           |
| RP11-44N11.2 | APOD       | -0.078201051 | 0.101756567 |
| RP11-44N11.2 | DPP6       | -0.416434243 | 0           |
| RP11-44N11.2 | MMRN1      | -0.398992956 | 0           |
| RP11-44N11.2 | WDR72      | -0.564660853 | 0           |
| RP11-44N11.2 | MPPED2     | -0.483858083 | 0           |
| RP11-44N11.2 | PAPSS2     | -0.455506968 | 0           |
| RP11-44N11.2 | DCN        | -0.165897248 | 0.000490587 |
| RP11-44N11.2 | SORBS2     | -0.435737851 | 0           |
| RP11-44N11.2 | EGR2       | -0.161334773 | 0.000701502 |
| RP11-44N11.2 | EDN3       | -0.34163166  | 1.84E-13    |
| RP11-44N11.2 | DIO2       | -0.547164676 | 0           |
| RP11-44N11.2 | ITPR1      | -0.470935586 | 0           |
| RP11-44N11.2 | CFD        | -0.139138964 | 0.003511915 |
| RP11-44N11.2 | CPXM1      | -0.273690772 | 6.41E-09    |
| RP11-44N11.2 | ELM01      | -0.446869655 | 0           |
| RP11-44N11.2 | GPC3       | -0.344074766 | 1.20E-13    |
| RP11-44N11.2 | MYOC       | -0.175962452 | 0.000211173 |
| RP11-44N11.2 | DEPTOR     | -0.416525728 | 0           |
| RP11-44N11.2 | DGKI       | -0.359180976 | 1.04E-14    |
| RP11-44N11.2 | CARTPT     | -0.3548224   | 1.80E-14    |
| RP11-44N11.2 | IYD        | -0.582549352 | 0           |
| RP11-44N11.2 | LYVE1      | -0.298685312 | 2.09E-10    |
| RP11-44N11.2 | CLCNKB     | -0.397860954 | 0           |
| RP11-44N11.2 | NCAM1      | -0.494528491 | 0           |
| RP11-44N11.2 | HBA2       | -0.222113969 | 2.77E-06    |
| RP11-44N11.2 | GLT8D2     | -0.366780184 | 2.22E-15    |
| RP11-44N11.2 | OGDHL      | -0.599194081 | 0           |
| RP11-44N11.2 | LIFR       | -0.529043989 | 0           |
| RP11-44N11.2 | CSGALNACT1 | -0.312845338 | 2.58E-11    |
| RP11-44N11.2 | RAP1GAP    | -0.502633348 | 0           |
| RP11-44N11.2 | COL9A3     | -0.396856464 | 0           |
| RP11-44N11.2 | FBLN1      | -0.165185225 | 0.000519058 |
| RP11-44N11.2 | EFEMP1     | -0.322002343 | 6.26E-12    |
| RP11-44N11.2 | AOX1       | -0.381716073 | 1.12E-16    |
| RP11-44N11.2 | GRIN2C     | -0.303410899 | 1.05E-10    |
| RP11-44N11.2 | C11orf74   | -0.392665602 | 0           |
| RP11-44N11.2 | PPARGC1A   | -0.628825986 | 0           |

|              |          |              |             |
|--------------|----------|--------------|-------------|
| RP11-44N11.2 | ANGPTL1  | -0.279894445 | 2.83E-09    |
| RP11-44N11.2 | SCARA5   | -0.225561267 | 1.80E-06    |
| RP11-44N11.2 | LTF      | -0.330992406 | 1.48E-12    |
| RP11-44N11.2 | CA4      | -0.340485119 | 2.24E-13    |
| RP11-44N11.2 | TG       | -0.395528726 | 0           |
| RP11-44N11.2 | FCGBP    | -0.354991674 | 2.30E-14    |
| RP11-44N11.2 | PBX4     | -0.354674243 | 2.45E-14    |
| RP11-44N11.2 | CYR61    | -0.249622004 | 1.28E-07    |
| RP11-44N11.2 | FOS      | -0.21999861  | 3.46E-06    |
| RP11-44N11.2 | KHDRBS2  | -0.480336551 | 0           |
| RP11-44N11.2 | MUM1L1   | -0.386102656 | 0           |
| RP11-44N11.2 | RGS16    | -0.479512619 | 0           |
| RP11-44N11.2 | MT1M     | -0.33884224  | 4.03E-13    |
| RP11-44N11.2 | LRP2     | -0.415152035 | 0           |
| RP11-44N11.2 | MAFB     | -0.425762162 | 0           |
| RP11-44N11.2 | KCNK2    | -0.372393246 | 6.15E-16    |
| RP11-44N11.2 | TBC1D4   | -0.448278381 | 0           |
| RP11-44N11.2 | MIOX     | -0.359080213 | 8.33E-15    |
| RP11-44N11.2 | TPPP     | -0.519709546 | 0           |
| RP11-44N11.2 | FMOD     | -0.436814537 | 0           |
| RP11-44N11.2 | CITED2   | -0.439628869 | 0           |
| RP11-44N11.2 | RGS8     | -0.397906534 | 4.17E-18    |
| RP11-44N11.2 | ABI3BP   | -0.484255511 | 0           |
| RP11-44N11.2 | ADH1B    | -0.233887057 | 7.22E-07    |
| RP11-44N11.2 | OGN      | -0.198176953 | 2.89E-05    |
| RP11-44N11.2 | NR4A1    | -0.200597844 | 2.38E-05    |
| RP11-44N11.2 | FOXJ1    | -0.366458172 | 2.12E-15    |
| RP11-44N11.2 | ALDH1A1  | -0.413208015 | 0           |
| RP11-44N11.2 | OCA2     | -0.238957769 | 4.06E-07    |
| RP11-44N11.2 | TMEM139  | -0.268395709 | 1.27E-08    |
| RP11-44N11.2 | ARHGAP24 | -0.498998063 | 0           |
| RP11-44N11.2 | SLC25A15 | -0.554526874 | 0           |
| RP11-44N11.2 | DES      | -0.168624852 | 0.000387503 |
| RP11-44N11.2 | GDF10    | -0.267882989 | 1.19E-08    |
| RP11-44N11.2 | KIAA1324 | -0.35722263  | 1.51E-14    |
| RP11-44N11.2 | JUN      | -0.267753754 | 1.38E-08    |
| RP11-44N11.2 | C7       | -0.062641944 | 0.190105511 |
| RP11-44N11.2 | LGI3     | -0.542400792 | 0           |
| RP11-44N11.2 | CDON     | -0.500657273 | 0           |
| RP11-44N11.2 | BCL2     | -0.448984588 | 0           |
| RP11-44N11.2 | HLF      | -0.50916821  | 0           |
| RP11-44N11.2 | EGR1     | -0.237058355 | 5.46E-07    |
| RP11-44N11.2 | IP6K3    | -0.565457269 | 0           |
| RP11-44N11.2 | SCUBE3   | -0.338430345 | 4.32E-13    |
| RP11-44N11.2 | PKNOX2   | -0.226217175 | 1.79E-06    |
| RP11-44N11.2 | SMAD9    | -0.327416692 | 2.65E-12    |
| RP11-44N11.2 | IQGAP2   | -0.588315032 | 0           |
| RP11-44N11.2 | GNA14    | -0.431787829 | 0           |
| RP11-44N11.2 | LAYN     | -0.305630509 | 7.59E-11    |
| RP11-44N11.2 | AVPR1A   | -0.467127826 | 0           |
| RP11-44N11.2 | PDLIM3   | -0.396791077 | 0           |

|              |          |              |             |
|--------------|----------|--------------|-------------|
| RP11-44N11.2 | GPM6A    | -0.490809663 | 0           |
| RP11-44N11.2 | SDPR     | -0.406603653 | 0           |
| RP11-44N11.2 | CRYAB    | -0.386091167 | 0           |
| RP11-44N11.2 | FOXA2    | -0.188473271 | 7.09E-05    |
| RP11-44N11.2 | C8orf88  | -0.443377341 | 0           |
| RP11-44N11.2 | ISM1     | -0.394335876 | 0           |
| RP11-44N11.2 | BMP2     | -0.261389805 | 3.07E-08    |
| RP11-44N11.2 | ID4      | -0.29259979  | 4.95E-10    |
| RP11-44N11.2 | NUPR1    | -0.480800359 | 0           |
| RP11-44N11.2 | SERTM1   | -0.45879507  | 3.08E-24    |
| RP11-44N11.2 | IRS1     | -0.47855919  | 0           |
| RP11-44N11.2 | FIBIN    | -0.338625513 | 4.18E-13    |
| RP11-44N11.2 | PODN     | -0.161585399 | 0.000688019 |
| RP11-44N11.2 | TDRD9    | -0.399833909 | 0           |
| RP11-44N11.2 | EPHA3    | -0.281080629 | 2.41E-09    |
| RP11-44N11.2 | AIF1L    | -0.419251412 | 0           |
| RP11-44N11.2 | EBF4     | -0.373375752 | 4.80E-16    |
| RP11-44N11.2 | ADM2     | -0.429727928 | 0           |
| RP11-44N11.2 | GSTM3    | -0.4257589   | 0           |
| RP11-44N11.2 | HSD17B6  | -0.205976733 | 1.42E-05    |
| RP11-44N11.2 | AGR3     | -0.250774145 | 1.01E-07    |
| RP11-44N11.2 | EPHB1    | -0.516039368 | 0           |
| RP11-44N11.2 | TMOD1    | -0.342033008 | 2.34E-13    |
| RP11-44N11.2 | WASF3    | -0.509831157 | 0           |
| RP11-44N11.2 | SELV     | -0.386992796 | 3.92E-17    |
| RP11-44N11.2 | ENPP1    | -0.428858041 | 0           |
| RP11-44N11.2 | SYNE1    | -0.430236358 | 3.31E-21    |
| RP11-44N11.2 | PLCH1    | -0.298186896 | 2.24E-10    |
| RP11-44N11.2 | CCDC146  | -0.431319482 | 0           |
| RP11-44N11.2 | SLC16A2  | -0.352678169 | 3.54E-14    |
| RP11-44N11.2 | IER2     | -0.203903783 | 1.74E-05    |
| RP11-44N11.2 | KCNAB1   | -0.251282633 | 1.05E-07    |
| RP11-44N11.2 | SYNDIG1  | -0.389201656 | 0           |
| RP11-44N11.2 | C16orf89 | -0.440370677 | 0           |
| RP11-44N11.2 | CTGF     | -0.191457859 | 5.57E-05    |
| RP11-44N11.2 | NR4A3    | -0.186839216 | 8.44E-05    |
| RP11-44N11.2 | KIAA1456 | -0.56234905  | 0           |
| RP11-44N11.2 | AQP4     | -0.416266166 | 0           |
| RP11-44N11.2 | RNF150   | -0.4348908   | 0           |
| RP11-44N11.2 | C1S      | -0.126081295 | 0.008211017 |
| RP11-44N11.2 | PFKFB2   | -0.66137704  | 0           |
| RP11-44N11.2 | PROX1    | -0.390447695 | 0           |
| RP11-44N11.2 | TCF7L1   | -0.341512608 | 2.55E-13    |
| RP11-44N11.2 | HSPB6    | -0.214402568 | 6.14E-06    |
| RP11-44N11.2 | FHDC1    | -0.599209967 | 0           |
| RP11-44N11.2 | PRR15L   | -0.541392472 | 0           |
| RP11-44N11.2 | SLC1A1   | -0.454573964 | 0           |
| RP11-44N11.2 | BTBD11   | -0.446495772 | 0           |
| RP11-44N11.2 | TRIM58   | -0.477056426 | 0           |
| RP11-44N11.2 | LRIG1    | -0.495209451 | 0           |
| RP11-44N11.2 | ROR2     | -0.214432779 | 6.12E-06    |

|              |          |              |             |
|--------------|----------|--------------|-------------|
| RP11-44N11.2 | GPR125   | -0.441104684 | 0           |
| RP11-44N11.2 | FLRT1    | -0.401029879 | 0           |
| RP11-44N11.2 | PGF      | -0.267318881 | 1.46E-08    |
| RP11-44N11.2 | DUSP1    | -0.20750517  | 1.22E-05    |
| RP11-44N11.2 | PLA2G7   | -0.236366899 | 5.90E-07    |
| RP11-44N11.2 | PLSCR4   | -0.44572205  | 0           |
| RP11-44N11.2 | FAM46B   | -0.454967562 | 0           |
| RP11-44N11.2 | GLDC     | -0.359985618 | 8.88E-15    |
| RP11-44N11.2 | ZBTB16   | -0.491679408 | 0           |
| RP11-44N11.2 | OMD      | -0.170890276 | 0.000322116 |
| RP11-44N11.2 | HSD11B2  | -0.293151536 | 4.58E-10    |
| RP11-44N11.2 | FGL2     | -0.213069866 | 7.03E-06    |
| RP11-44N11.2 | CLCNKA   | -0.407720919 | 5.18E-19    |
| RP11-44N11.2 | GATM     | -0.570145553 | 0           |
| RP11-44N11.2 | TNS3     | -0.455749368 | 0           |
| RP11-44N11.2 | TOB1     | -0.279666087 | 2.91E-09    |
| RP11-44N11.2 | MARC2    | -0.559816973 | 0           |
| RP11-44N11.2 | LRRC2    | -0.54333791  | 0           |
| RP11-44N11.2 | SORD     | -0.335481268 | 7.08E-13    |
| RP11-44N11.2 | RIMS4    | -0.289867297 | 7.26E-10    |
| RP11-44N11.2 | SLC29A4  | -0.307581195 | 5.68E-11    |
| RP11-44N11.2 | SLC39A14 | -0.678122615 | 0           |
| RP11-44N11.2 | FAXDC2   | -0.497921661 | 0           |
| RP11-44N11.2 | HSPB8    | -0.342610002 | 2.12E-13    |
| RP11-44N11.2 | CCL19    | 0.005443299  | 0.909455431 |
| RP11-44N11.2 | KCNIP3   | -0.374984753 | 3.14E-16    |
| RP11-44N11.2 | CGNL1    | -0.328274807 | 2.31E-12    |
| RP11-44N11.2 | ATF3     | -0.060150432 | 0.20836305  |
| RP11-44N11.2 | SGCD     | -0.257198234 | 5.15E-08    |
| RP11-44N11.2 | STARD13  | -0.391324532 | 0           |
| RP11-44N11.2 | LDHD     | -0.490824556 | 0           |
| RP11-44N11.2 | RCAN1    | -0.250114746 | 1.21E-07    |
| RP11-44N11.2 | ID3      | -0.219924855 | 3.48E-06    |
| RP11-44N11.2 | SYTL3    | -0.508863119 | 0           |
| RP11-44N11.2 | MT1E     | -0.248487165 | 1.47E-07    |
| RP11-44N11.2 | CAMK1D   | -0.519860602 | 0           |
| RP11-44N11.2 | PRKCQ    | -0.562255721 | 0           |
| RP11-44N11.2 | NUAK2    | -0.362171044 | 5.76E-15    |
| RP11-44N11.2 | LIPG     | -0.34926883  | 6.56E-14    |
| RP11-44N11.2 | SLC25A25 | -0.370789068 | 9.04E-16    |
| RP11-44N11.2 | PRKX     | -0.259858957 | 3.72E-08    |
| RP11-44N11.2 | SRPX     | -0.127694551 | 0.007421813 |
| RP11-44N11.2 | FAM189A1 | -0.37476533  | 3.33E-16    |
| RP11-44N11.2 | PLEKHH1  | -0.383851133 | 0           |
| RP11-44N11.2 | WNT11    | -0.320448801 | 7.99E-12    |
| RP11-44N11.2 | SNAI1    | -0.222650113 | 2.62E-06    |
| RP11-44N11.2 | FDCSP    | -0.093360527 | 0.050604973 |
| RP11-44N11.2 | MT1X     | -0.306392174 | 6.78E-11    |
| RP11-44N11.2 | ACACB    | -0.561015213 | 0           |
| RP11-44N11.2 | ARC      | -0.050191906 | 0.293915066 |
| RP11-44N11.2 | KLK4     | -0.35056753  | 3.86E-14    |

|              |          |              |             |
|--------------|----------|--------------|-------------|
| RP11-44N11.2 | ZFPM2    | -0.159866616 | 0.000785531 |
| RP11-44N11.2 | AKAP12   | -0.275864285 | 4.82E-09    |
| RP11-44N11.2 | GJB6     | -0.297913193 | 1.90E-10    |
| RP11-44N11.2 | ERO1LB   | -0.411517601 | 0           |
| RP11-44N11.2 | DNALI1   | -0.294327791 | 3.88E-10    |
| RP11-44N11.2 | HKDC1    | -0.316085749 | 1.57E-11    |
| RP11-44N11.2 | ZFP36L2  | -0.360183055 | 8.54E-15    |
| RP11-44N11.2 | CAPSL    | -0.300069802 | 1.38E-10    |
| RP11-44N11.2 | CYP7B1   | -0.444894289 | 0           |
| RP11-44N11.2 | CPQ      | -0.195787295 | 3.75E-05    |
| RP11-44N11.2 | RPS6KA6  | -0.476129466 | 3.20E-26    |
| RP11-44N11.2 | TLE1     | -0.447220843 | 0           |
| RP11-44N11.2 | TP53INP2 | -0.423025698 | 0           |
| RP11-44N11.2 | KATNAL2  | -0.48330889  | 0           |
| RP11-44N11.2 | SGPP2    | -0.388067809 | 0           |
| RP11-44N11.2 | CTH      | -0.441802807 | 0           |
| RP11-44N11.2 | KIF12    | -0.190950791 | 5.84E-05    |
| RP11-44N11.2 | TMEM220  | -0.452011534 | 0           |
| RP11-44N11.2 | CENPJ    | -0.336633836 | 5.84E-13    |
| RP11-44N11.2 | FAM155B  | -0.271890292 | 8.11E-09    |
| RP11-44N11.2 | WFS1     | -0.375868823 | 2.45E-16    |
| RP11-44N11.2 | SELENBP1 | -0.379560844 | 7.04E-17    |
| RP11-44N11.2 | SNTA1    | -0.495384762 | 0           |
| RP11-44N11.2 | FRAS1    | -0.311909638 | 2.97E-11    |
| RP11-44N11.2 | FBLN7    | -0.462653149 | 0           |
| RP11-44N11.2 | AGPAT9   | -0.44759657  | 0           |
| RP11-44N11.2 | GPR83    | -0.376507374 | 2.03E-16    |
| RP11-44N11.2 | PRTG     | -0.495675386 | 0           |
| RP11-44N11.2 | EGR3     | -0.033085213 | 0.489148992 |
| RP11-44N11.2 | GRAMD2   | -0.305071387 | 8.24E-11    |
| RP11-44N11.2 | HYOU1    | -0.414791769 | 0           |
| RP11-44N11.2 | FBLN5    | -0.231652374 | 9.95E-07    |
| RP11-44N11.2 | ITM2A    | -0.311247543 | 3.28E-11    |
| RP11-44N11.2 | SRF      | -0.280047487 | 2.77E-09    |
| RP11-44N11.2 | FGFR2    | -0.402692636 | 0           |
| RP11-44N11.2 | MT1A     | -0.239503919 | 3.82E-07    |
| RP11-44N11.2 | MAMDC2   | -0.20933572  | 1.02E-05    |
| RP11-44N11.2 | FHL2     | -0.281302888 | 2.34E-09    |
| RP11-44N11.2 | FTCDNL1  | -0.590370535 | 0           |
| RP11-44N11.2 | PKIA     | -0.192429585 | 5.10E-05    |
| RP11-44N11.2 | DNAJB4   | -0.37731769  | 1.58E-16    |
| RP11-44N11.2 | SLC25A33 | -0.373567374 | 4.57E-16    |
| RP11-44N11.2 | EYA2     | -0.412269337 | 0           |
| RP11-44N11.2 | LPAR1    | -0.411427392 | 0           |
| RP11-44N11.2 | STX11    | -0.445176403 | 0           |
| RP11-44N11.2 | ARHGEF28 | -0.516744866 | 0           |
| RP11-44N11.2 | OR2W3    | -0.379160721 | 8.27E-17    |
| RP11-44N11.2 | ALDH1B1  | -0.562597852 | 5.21E-38    |
| RP11-44N11.2 | CXCL12   | -0.138361412 | 0.003701551 |
| RP11-44N11.2 | OLFM2    | -0.198052434 | 3.03E-05    |
| RP11-44N11.2 | TUB      | -0.480730575 | 0           |



|              |          |              |             |
|--------------|----------|--------------|-------------|
| RP11-44N11.2 | HTRA3    | -0.120205976 | 0.011755815 |
| RP11-44N11.2 | CKB      | -0.345382634 | 1.31E-13    |
| RP11-44N11.2 | RGS2     | -0.194317863 | 4.29E-05    |
| RP11-44N11.2 | SHANK2   | -0.442436535 | 0           |
| RP11-44N11.2 | CNTFR    | -0.41445058  | 1.19E-19    |
| RP11-44N11.2 | CYTH3    | -0.407359078 | 0           |
| RP11-44N11.2 | PLAC9    | -0.070387669 | 0.140866559 |
| RP11-44N11.2 | WVOX     | -0.422399062 | 0           |
| RP11-44N11.2 | NPR3     | -0.234456494 | 7.30E-07    |
| RP11-44N11.2 | SDC2     | -0.13904833  | 0.003533556 |
| RP11-44N11.2 | KLF15    | -0.49794478  | 0           |
| RP11-44N11.2 | TMEM164  | -0.438608351 | 0           |
| RP11-44N11.2 | LONRF3   | -0.207661049 | 1.20E-05    |
| RP11-44N11.2 | GBP1     | -0.251611695 | 1.01E-07    |
| RP11-44N11.2 | ARHGAP6  | -0.47855536  | 0           |
| RP11-44N11.2 | TMEM119  | -0.111973607 | 0.018976773 |
| RP11-44N11.2 | SH3RF1   | -0.472009861 | 0           |
| RP11-44N11.2 | CRELD2   | -0.222509411 | 2.66E-06    |
| RP11-44N11.2 | PCP4     | -0.094197727 | 0.048589713 |
| RP11-44N11.2 | GCSH     | -0.392112721 | 0           |
| RP11-44N11.2 | IMPA2    | -0.397961233 | 0           |
| RP11-44N11.2 | C1R      | -0.068764485 | 0.150277682 |
| RP11-44N11.2 | SUCNR1   | -0.214100455 | 6.33E-06    |
| RP11-44N11.2 | SFRP1    | -0.330792416 | 1.53E-12    |
| RP11-44N11.2 | UGT8     | -0.550744787 | 0           |
| RP11-44N11.2 | TLE4     | -0.180989853 | 0.00014074  |
| RP11-44N11.2 | ANTXR1   | -0.332846785 | 1.09E-12    |
| RP11-44N11.2 | GPX3     | -0.274270177 | 5.95E-09    |
| RP11-44N11.2 | DPY19L2  | -0.393524568 | 0           |
| RP11-44N11.2 | FAM46C   | -0.437023746 | 0           |
| RP11-44N11.2 | IL33     | -0.187535005 | 7.71E-05    |
| RP11-44N11.2 | PEG3     | -0.434739318 | 0           |
| RP11-44N11.2 | FAHD2A   | -0.449659024 | 0           |
| RP11-44N11.2 | PTGDS    | -0.073247248 | 0.125395004 |
| RP11-44N11.2 | CHCHD10  | -0.365416703 | 2.96E-15    |
| RP11-44N11.2 | CD36     | -0.42365588  | 0           |
| RP11-44N11.2 | ANKRD37  | -0.171208623 | 0.000319807 |
| RP11-44N11.2 | TSPAN33  | -0.370854455 | 8.90E-16    |
| RP11-44N11.2 | PRDM16   | -0.362600243 | 5.28E-15    |
| RP11-44N11.2 | UST      | -0.463493108 | 0           |
| RP11-44N11.2 | NEXN     | -0.474965463 | 0           |
| RP11-44N11.2 | NUPR1L   | -0.132192679 | 0.00553664  |
| RP11-44N11.2 | SLC24A3  | -0.561898575 | 0           |
| RP11-44N11.2 | MARC1    | -0.343594635 | 1.78E-13    |
| RP11-44N11.2 | MYH11    | -0.152291804 | 0.001387338 |
| RP11-44N11.2 | APOA1    | -0.207249729 | 1.20E-05    |
| RP11-44N11.2 | TMEM178B | -0.212535991 | 7.42E-06    |
| RP11-44N11.2 | CAPNG    | -0.150573271 | 0.001556583 |
| RP11-44N11.2 | PPM1L    | -0.464600714 | 0           |
| RP11-44N11.2 | FZD8     | -0.344853582 | 1.43E-13    |
| RP11-44N11.2 | RCAN2    | -0.367502135 | 1.90E-15    |

|              |          |              |             |
|--------------|----------|--------------|-------------|
| RP11-44N11.2 | COPZ2    | -0.411930488 | 0           |
| RP11-44N11.2 | GAS1     | -0.291667778 | 5.64E-10    |
| RP11-44N11.2 | DACT1    | -0.298165195 | 2.25E-10    |
| RP11-44N11.2 | WBSCR17  | -0.181427137 | 0.000135533 |
| RP11-44N11.2 | NCS1     | -0.307015974 | 6.18E-11    |
| RP11-44N11.2 | SPIRE2   | -0.412743073 | 0           |
| RP11-44N11.2 | C15orf52 | -0.413935214 | 0           |
| RP11-44N11.2 | SPAG5    | -0.346536621 | 1.07E-13    |
| RP11-44N11.2 | ARL4D    | -0.354663179 | 2.45E-14    |
| RP11-44N11.2 | FAM189A2 | -0.150417143 | 0.001590914 |
| RP11-44N11.2 | MAP1LC3A | -0.308008834 | 5.33E-11    |
| RP11-44N11.2 | KLF6     | -0.086133577 | 0.071413722 |
| RP11-44N11.2 | ADD3     | -0.318505065 | 1.08E-11    |
| RP11-44N11.2 | TSPAN7   | -0.247263678 | 1.69E-07    |
| RP11-44N11.2 | KLF9     | -0.374023239 | 4.06E-16    |
| RP11-44N11.2 | KCNQ1    | -0.524376839 | 0           |
| RP11-44N11.2 | MAN1A1   | -0.200413172 | 2.43E-05    |
| RP11-44N11.2 | MLF1     | -0.278978602 | 3.19E-09    |
| RP11-44N11.2 | RARB     | -0.467006839 | 0           |
| RP11-44N11.2 | CDC42EP2 | -0.214059606 | 6.36E-06    |
| RP11-44N11.2 | FAM3B    | -0.262614427 | 2.64E-08    |
| RP11-44N11.2 | GADD45B  | -0.213722033 | 6.58E-06    |
| RP11-44N11.2 | TMEM47   | -0.316554237 | 1.46E-11    |
| RP11-44N11.2 | SDF2L1   | -0.130145638 | 0.006352224 |
| RP11-44N11.2 | CCDC85A  | -0.360432547 | 8.13E-15    |
| RP11-44N11.2 | CRYBG3   | -0.338738841 | 4.10E-13    |
| RP11-44N11.2 | FBLN2    | -0.10292227  | 0.031119154 |
| RP11-44N11.2 | PEBP4    | -0.338104687 | 4.56E-13    |
| RP11-44N11.2 | CDADC1   | -0.485176743 | 0           |
| RP11-44N11.2 | FAM63A   | -0.468378404 | 0           |
| RP11-44N11.2 | GLUL     | -0.412731159 | 0           |
| RP11-44N11.2 | FREM2    | -0.567066411 | 0           |
| RP11-44N11.2 | ACKR3    | -0.327399672 | 2.66E-12    |
| RP11-44N11.2 | DENND6A  | -0.516165178 | 0           |
| RP11-44N11.2 | CLDN8    | -0.262171044 | 2.79E-08    |
| RP11-44N11.2 | UTS2R    | -0.111031607 | 0.019968633 |
| RP11-44N11.2 | SCNN1B   | -0.358325272 | 1.23E-14    |
| RP11-44N11.2 | TTC30A   | -0.486166199 | 0           |
| RP11-44N11.2 | CORO2B   | -0.298285756 | 2.21E-10    |
| RP11-44N11.2 | TC2N     | -0.338397297 | 4.34E-13    |
| RP11-44N11.2 | ALDH2    | -0.534626699 | 0           |
| RP11-44N11.2 | GPR183   | -0.119309991 | 0.012401515 |
| RP11-44N11.2 | C4orf47  | -0.206215729 | 1.39E-05    |
| RP11-44N11.2 | SLC25A42 | -0.431203318 | 0           |
| RP11-44N11.2 | LGMN     | -0.457723599 | 0           |
| RP11-44N11.2 | ACSF2    | -0.481076232 | 0           |
| RP11-44N11.2 | KIAA1467 | -0.589633833 | 0           |
| RP11-44N11.2 | PRKG1    | -0.386420513 | 0           |
| RP11-44N11.2 | GNAI1    | -0.470248385 | 0           |
| RP11-44N11.2 | ABCC4    | -0.379561695 | 7.04E-17    |
| RP11-44N11.2 | PRPS1    | -0.543277913 | 0           |

|              |          |              |             |
|--------------|----------|--------------|-------------|
| RP11-44N11.2 | TSPAN5   | -0.249152949 | 1.35E-07    |
| RP11-44N11.2 | CR2      | -0.211172115 | 8.11E-06    |
| RP11-44N11.2 | CCDC170  | -0.405451085 | 0           |
| RP11-44N11.2 | RRAD     | -0.049054372 | 0.305003544 |
| RP11-44N11.2 | SCGB2A1  | -0.391316447 | 0           |
| RP11-44N11.2 | SESN3    | -0.269352258 | 1.12E-08    |
| RP11-44N11.2 | SGK223   | -0.161807516 | 0.000676271 |
| RP11-44N11.2 | NDRG2    | -0.557599633 | 0           |
| RP11-44N11.2 | C3orf52  | -0.318943767 | 1.01E-11    |
| RP11-44N11.2 | FLRT3    | 0.292495397  | 5.03E-10    |
| RP11-44N11.2 | MST1R    | 0.593354647  | 0           |
| RP11-44N11.2 | SDC1     | 0.062203099  | 0.193233034 |
| RP11-44N11.2 | ST8SIA4  | 0.340553363  | 3.01E-13    |
| RP11-44N11.2 | UBTD1    | 0.466134825  | 0           |
| RP11-44N11.2 | EPHA2    | 0.444714865  | 0           |
| RP11-44N11.2 | TMEM130  | 0.487185866  | 0           |
| RP11-44N11.2 | SPINK2   | 0.312678821  | 2.64E-11    |
| RP11-44N11.2 | MMP16    | 0.514667945  | 0           |
| RP11-44N11.2 | SIGLEC15 | 0.558452926  | 0           |
| RP11-44N11.2 | RIN1     | 0.639169742  | 0           |
| RP11-44N11.2 | IL1RN    | 0.236049751  | 6.11E-07    |
| RP11-44N11.2 | FCER1G   | 0.232233765  | 9.33E-07    |
| RP11-44N11.2 | CD276    | 0.634575637  | 0           |
| RP11-44N11.2 | CTSB     | 0.250942366  | 1.10E-07    |
| RP11-44N11.2 | FAM171A2 | 0.359995121  | 8.86E-15    |
| RP11-44N11.2 | ASPHD1   | 0.425394378  | 0           |
| RP11-44N11.2 | C15orf48 | 0.234908955  | 6.94E-07    |
| RP11-44N11.2 | DYSF     | 0.317929064  | 1.18E-11    |
| RP11-44N11.2 | PDZRN4   | 0.345225195  | 1.34E-13    |
| RP11-44N11.2 | EFHD2    | 0.544782521  | 0           |
| RP11-44N11.2 | ASF1B    | 0.243528823  | 2.61E-07    |
| RP11-44N11.2 | AQP1     | 0.265459254  | 1.85E-08    |
| RP11-44N11.2 | ARRDC2   | 0.474484777  | 0           |
| RP11-44N11.2 | PRSS1    | 0.535862914  | 5.37E-34    |
| RP11-44N11.2 | MAPK13   | 0.419285878  | 0           |
| RP11-44N11.2 | CST5     | 0.487233834  | 1.49E-27    |
| RP11-44N11.2 | AHR      | 0.326898561  | 2.88E-12    |
| RP11-44N11.2 | BAX      | 0.489317111  | 0           |
| RP11-44N11.2 | C1orf115 | 0.250868469  | 1.11E-07    |
| RP11-44N11.2 | PLK3     | 0.487069134  | 0           |
| RP11-44N11.2 | JAG2     | 0.423218171  | 0           |
| RP11-44N11.2 | RAD23B   | 0.43363781   | 0           |
| RP11-44N11.2 | CA12     | 0.10378308   | 0.029731569 |
| RP11-44N11.2 | ADTRP    | 0.37326058   | 4.95E-16    |
| RP11-44N11.2 | UCP2     | 0.493239475  | 0           |
| RP11-44N11.2 | IGFBP2   | 0.297173753  | 2.59E-10    |
| RP11-44N11.2 | LOXL2    | 0.292706451  | 4.88E-10    |
| RP11-44N11.2 | GPX1     | 0.460288156  | 0           |
| RP11-44N11.2 | P3H3     | 0.525841307  | 0           |
| RP11-44N11.2 | C2orf81  | 0.588272197  | 0           |
| RP11-44N11.2 | CDT1     | 0.338981524  | 3.93E-13    |

|              |          |             |             |
|--------------|----------|-------------|-------------|
| RP11-44N11.2 | SNX25    | 0.453138147 | 0           |
| RP11-44N11.2 | MTHFD1L  | 0.421729874 | 0           |
| RP11-44N11.2 | CDC42BPG | 0.430155795 | 3.37E-21    |
| RP11-44N11.2 | MSN      | 0.307432124 | 5.81E-11    |
| RP11-44N11.2 | SIGLEC6  | 0.372020185 | 7.40E-16    |
| RP11-44N11.2 | F2R      | 0.259465643 | 3.90E-08    |
| RP11-44N11.2 | TMEM184A | 0.449671222 | 0           |
| RP11-44N11.2 | CKS2     | 0.263205037 | 2.45E-08    |
| RP11-44N11.2 | TAX1BP3  | 0.596164015 | 0           |
| RP11-44N11.2 | PMEPA1   | 0.504973945 | 0           |
| RP11-44N11.2 | CXCL16   | 0.328845134 | 2.10E-12    |
| RP11-44N11.2 | FAXC     | 0.574811002 | 0           |
| RP11-44N11.2 | VTCN1    | 0.343148137 | 1.41E-13    |
| RP11-44N11.2 | SH2D4A   | 0.428752798 | 0           |
| RP11-44N11.2 | RNF24    | 0.405600297 | 0           |
| RP11-44N11.2 | LY6G6C   | 0.39321146  | 1.10E-17    |
| RP11-44N11.2 | NID1     | 0.320098747 | 8.44E-12    |
| RP11-44N11.2 | STAC     | 0.487440322 | 0           |
| RP11-44N11.2 | RAB34    | 0.697108083 | 0           |
| RP11-44N11.2 | HES4     | 0.425841732 | 0           |
| RP11-44N11.2 | EPHA10   | 0.498180797 | 0           |
| RP11-44N11.2 | ENTPD2   | 0.514544263 | 0           |
| RP11-44N11.2 | DDB2     | 0.448580068 | 0           |
| RP11-44N11.2 | NKAIN4   | 0.348050165 | 8.16E-14    |
| RP11-44N11.2 | TRIM29   | 0.39625706  | 0           |
| RP11-44N11.2 | ADCY8    | 0.541189887 | 9.10E-35    |
| RP11-44N11.2 | SFTA2    | 0.2899324   | 7.19E-10    |
| RP11-44N11.2 | NRIP1    | 0.475059643 | 0           |
| RP11-44N11.2 | VWA1     | 0.436688869 | 0           |
| RP11-44N11.2 | APLNR    | 0.317274912 | 1.31E-11    |
| RP11-44N11.2 | REN      | 0.533037508 | 1.36E-33    |
| RP11-44N11.2 | EDIL3    | 0.259468763 | 3.90E-08    |
| RP11-44N11.2 | AGRN     | 0.466142909 | 0           |
| RP11-44N11.2 | TREM1    | 0.435452616 | 0           |
| RP11-44N11.2 | SRL      | 0.351506594 | 4.38E-14    |
| RP11-44N11.2 | RASGRF1  | 0.593797462 | 0           |
| RP11-44N11.2 | RMI2     | 0.477626327 | 0           |
| RP11-44N11.2 | SAMD1    | 0.544756707 | 0           |
| RP11-44N11.2 | MGAT4B   | 0.465319403 | 0           |
| RP11-44N11.2 | NXN      | 0.541518707 | 0           |
| RP11-44N11.2 | SH3BGRL3 | 0.482983374 | 0           |
| RP11-44N11.2 | CA11     | 0.438296735 | 0           |
| RP11-44N11.2 | PLD3     | 0.444827909 | 0           |
| RP11-44N11.2 | LURAP1L  | 0.18729423  | 8.11E-05    |
| RP11-44N11.2 | CARNS1   | 0.392280089 | 0           |
| RP11-44N11.2 | PDLIM7   | 0.594471614 | 0           |
| RP11-44N11.2 | BCL2L1   | 0.522564727 | 0           |
| RP11-44N11.2 | GGT6     | 0.147644653 | 0.001942598 |
| RP11-44N11.2 | DPYSL3   | 0.485966209 | 0           |
| RP11-44N11.2 | FYN      | 0.415528613 | 0           |
| RP11-44N11.2 | TK1      | 0.265785338 | 1.77E-08    |

|              |          |             |             |
|--------------|----------|-------------|-------------|
| RP11-44N11.2 | AK1      | 0.325781452 | 3.44E-12    |
| RP11-44N11.2 | HIGD1B   | 0.297503808 | 2.47E-10    |
| RP11-44N11.2 | TMEM59L  | 0.544862234 | 0           |
| RP11-44N11.2 | MEGF9    | 0.28286338  | 1.90E-09    |
| RP11-44N11.2 | ZFP36L1  | 0.367338596 | 1.97E-15    |
| RP11-44N11.2 | ADRA1B   | 0.451739349 | 0           |
| RP11-44N11.2 | EPHA4    | 0.503776555 | 0           |
| RP11-44N11.2 | TCERG1L  | 0.475609261 | 0           |
| RP11-44N11.2 | NGFR     | 0.421812991 | 0           |
| RP11-44N11.2 | EBI3     | 0.369805286 | 1.14E-15    |
| RP11-44N11.2 | S100A10  | 0.467038469 | 0           |
| RP11-44N11.2 | S100B    | 0.360928693 | 7.38E-15    |
| RP11-44N11.2 | CD44     | 0.298837077 | 2.04E-10    |
| RP11-44N11.2 | BHLHE41  | 0.428334946 | 0           |
| RP11-44N11.2 | FBXO2    | 0.485619701 | 0           |
| RP11-44N11.2 | SLC30A2  | 0.150993002 | 0.001525635 |
| RP11-44N11.2 | FRMD5    | 0.242281649 | 3.02E-07    |
| RP11-44N11.2 | SAMD11   | 0.355630225 | 2.04E-14    |
| RP11-44N11.2 | SIPA1L2  | 0.502754619 | 0           |
| RP11-44N11.2 | S100A16  | 0.534364868 | 0           |
| RP11-44N11.2 | PPL      | 0.431782864 | 0           |
| RP11-44N11.2 | ARHGDIB  | 0.36866137  | 1.47E-15    |
| RP11-44N11.2 | CDC42EP3 | 0.347719401 | 8.65E-14    |
| RP11-44N11.2 | RUNX2    | 0.485226528 | 0           |
| RP11-44N11.2 | LAMC2    | 0.300906197 | 1.51E-10    |
| RP11-44N11.2 | BRINP1   | 0.409506492 | 0           |
| RP11-44N11.2 | GPRC5B   | 0.385977414 | 0           |
| RP11-44N11.2 | AQP5     | 0.424160253 | 0           |
| RP11-44N11.2 | PLAG1    | 0.38350959  | 0           |
| RP11-44N11.2 | PTPRU    | 0.424795258 | 0           |
| RP11-44N11.2 | ANGPTL4  | 0.466473674 | 0           |
| RP11-44N11.2 | PALM3    | 0.395214841 | 0           |
| RP11-44N11.2 | ACP5     | 0.348759209 | 7.19E-14    |
| RP11-44N11.2 | DLG4     | 0.425062763 | 0           |
| RP11-44N11.2 | ETNK2    | 0.513392546 | 0           |
| RP11-44N11.2 | CD109    | 0.568130189 | 0           |
| RP11-44N11.2 | SNX22    | 0.459555568 | 0           |
| RP11-44N11.2 | TMEM98   | 0.582245679 | 0           |
| RP11-44N11.2 | CTHRC1   | 0.349671505 | 6.11E-14    |
| RP11-44N11.2 | S100A2   | 0.414473486 | 0           |
| RP11-44N11.2 | C11orf80 | 0.526153916 | 0           |
| RP11-44N11.2 | SREBF1   | 0.511857442 | 0           |
| RP11-44N11.2 | PRSS22   | 0.390587546 | 0           |
| RP11-44N11.2 | CMTM3    | 0.536103791 | 0           |
| RP11-44N11.2 | RDH5     | 0.493388262 | 0           |
| RP11-44N11.2 | MYH10    | 0.457832388 | 0           |
| RP11-44N11.2 | EVPL     | 0.543484002 | 0           |
| RP11-44N11.2 | SCD      | 0.229458296 | 1.26E-06    |
| RP11-44N11.2 | CD151    | 0.622678197 | 0           |
| RP11-44N11.2 | S100A4   | 0.414265553 | 0           |
| RP11-44N11.2 | BNIP1    | 0.368372447 | 1.57E-15    |

|              |          |             |             |
|--------------|----------|-------------|-------------|
| RP11-44N11.2 | MAP3K6   | 0.461550649 | 0           |
| RP11-44N11.2 | MANEAL   | 0.254311849 | 7.32E-08    |
| RP11-44N11.2 | CD207    | 0.40069174  | 2.32E-18    |
| RP11-44N11.2 | CD1A     | 0.398407698 | 3.75E-18    |
| RP11-44N11.2 | C3       | 0.328982148 | 2.06E-12    |
| RP11-44N11.2 | NT5E     | 0.449803981 | 0           |
| RP11-44N11.2 | CACNG4   | 0.449202343 | 3.46E-23    |
| RP11-44N11.2 | FHOD1    | 0.404724311 | 0           |
| RP11-44N11.2 | LEMD1    | 0.53602961  | 0           |
| RP11-44N11.2 | ATP11A   | 0.419870106 | 0           |
| RP11-44N11.2 | PPAP2C   | 0.470161155 | 0           |
| RP11-44N11.2 | DRAM1    | 0.486208467 | 0           |
| RP11-44N11.2 | CDA      | 0.351651693 | 4.27E-14    |
| RP11-44N11.2 | CCND2    | 0.453701524 | 0           |
| RP11-44N11.2 | LCN6     | 0.518551606 | 1.39E-31    |
| RP11-44N11.2 | CDH4     | 0.494330912 | 0           |
| RP11-44N11.2 | MMP11    | 0.432694452 | 0           |
| RP11-44N11.2 | B3GAT1   | 0.434890516 | 0           |
| RP11-44N11.2 | SPP1     | 0.1085637   | 0.022952951 |
| RP11-44N11.2 | HLA-DQB1 | 0.204016686 | 1.72E-05    |
| RP11-44N11.2 | SDC3     | 0.613333683 | 0           |
| RP11-44N11.2 | CX3CL1   | 0.38224341  | 1.45E-17    |
| RP11-44N11.2 | SDK1     | 0.538060859 | 0           |
| RP11-44N11.2 | DOCK9    | 0.409277709 | 0           |
| RP11-44N11.2 | CSF2     | 0.536291156 | 4.66E-34    |
| RP11-44N11.2 | GRHL3    | 0.52755626  | 0           |
| RP11-44N11.2 | TMEM92   | 0.546738389 | 1.38E-35    |
| RP11-44N11.2 | BASP1    | 0.568517405 | 0           |
| RP11-44N11.2 | HRH1     | 0.591096316 | 0           |
| RP11-44N11.2 | ESM1     | 0.203539971 | 1.80E-05    |
| RP11-44N11.2 | B4GALNT3 | 0.514562276 | 0           |
| RP11-44N11.2 | LMO3     | 0.386201658 | 0           |
| RP11-44N11.2 | C9orf16  | 0.52104863  | 0           |
| RP11-44N11.2 | SEMA3F   | 0.480052735 | 0           |
| RP11-44N11.2 | PLA2G12B | 0.254430799 | 6.48E-08    |
| RP11-44N11.2 | KLK6     | 0.48676302  | 1.70E-27    |
| RP11-44N11.2 | ST3GAL5  | 0.499435772 | 0           |
| RP11-44N11.2 | FAM132B  | 0.2767858   | 4.27E-09    |
| RP11-44N11.2 | CDKN1A   | 0.272517354 | 7.47E-09    |
| RP11-44N11.2 | E2F1     | 0.293025301 | 4.67E-10    |
| RP11-44N11.2 | B3GNT8   | 0.44176139  | 0           |
| RP11-44N11.2 | MTMR11   | 0.499214931 | 0           |
| RP11-44N11.2 | MYO1G    | 0.439491429 | 0           |
| RP11-44N11.2 | TMSB10   | 0.555023729 | 0           |
| RP11-44N11.2 | UNC5CL   | 0.500599829 | 0           |
| RP11-44N11.2 | ABR      | 0.448200229 | 0           |
| RP11-44N11.2 | PLP2     | 0.49330784  | 0           |
| RP11-44N11.2 | SRCIN1   | 0.242609434 | 2.91E-07    |
| RP11-44N11.2 | PDE9A    | 0.54454849  | 0           |
| RP11-44N11.2 | TREM2    | 0.249909933 | 1.24E-07    |
| RP11-44N11.2 | KDEL3    | 0.46333808  | 0           |

|              |          |             |          |
|--------------|----------|-------------|----------|
| RP11-44N11.2 | PC       | 0.517594187 | 0        |
| RP11-44N11.2 | C2CD4A   | 0.30576029  | 7.44E-11 |
| RP11-44N11.2 | PEL11    | 0.433520795 | 0        |
| RP11-44N11.2 | SSX1     | 0.345229592 | 1.34E-13 |
| RP11-44N11.2 | MROH6    | 0.479824235 | 0        |
| RP11-44N11.2 | ESPN     | 0.492454265 | 0        |
| RP11-44N11.2 | BMP1     | 0.448349725 | 0        |
| RP11-44N11.2 | TM4SF4   | 0.492252779 | 3.59E-28 |
| RP11-44N11.2 | CORO2A   | 0.502434776 | 0        |
| RP11-44N11.2 | CD164L2  | 0.422175754 | 2.11E-20 |
| RP11-44N11.2 | CTSS     | 0.266171419 | 1.69E-08 |
| RP11-44N11.2 | CLU      | 0.609223952 | 0        |
| RP11-44N11.2 | TMSB4X   | 0.543957313 | 0        |
| RP11-44N11.2 | WNT10A   | 0.434674159 | 1.17E-21 |
| RP11-44N11.2 | NAPSA    | 0.5098808   | 0        |
| RP11-44N11.2 | PLEKHA4  | 0.548025627 | 0        |
| RP11-44N11.2 | SFTPA1   | 0.29682624  | 2.22E-10 |
| RP11-44N11.2 | Clorf116 | 0.432633887 | 0        |
| RP11-44N11.2 | TM4SF1   | 0.442781341 | 0        |
| RP11-44N11.2 | SEL1L3   | 0.476985082 | 0        |
| RP11-44N11.2 | VASN     | 0.617124706 | 0        |
| RP11-44N11.2 | NPTXR    | 0.430099825 | 0        |
| RP11-44N11.2 | PDE4C    | 0.371714981 | 7.25E-16 |
| RP11-44N11.2 | CDC42EP1 | 0.704874233 | 0        |
| RP11-44N11.2 | ENDOD1   | 0.443521164 | 0        |
| RP11-44N11.2 | RYR1     | 0.647057872 | 0        |
| RP11-44N11.2 | IL1RAP   | 0.550956975 | 0        |
| RP11-44N11.2 | SLC35F2  | 0.539160896 | 1.80E-34 |
| RP11-44N11.2 | ISYNA1   | 0.610233975 | 0        |
| RP11-44N11.2 | HLA-G    | 0.35037757  | 5.38E-14 |
| RP11-44N11.2 | CDKN2B   | 0.408889642 | 0        |
| RP11-44N11.2 | ALDH1A3  | 0.394398426 | 0        |
| RP11-44N11.2 | CLIP3    | 0.48160415  | 0        |
| RP11-44N11.2 | ULBP2    | 0.509010062 | 0        |
| RP11-44N11.2 | ETHE1    | 0.529523824 | 0        |
| RP11-44N11.2 | XPR1     | 0.490663003 | 0        |
| RP11-44N11.2 | SPTBN2   | 0.337290684 | 5.23E-13 |
| RP11-44N11.2 | IVL      | 0.416882518 | 6.93E-20 |
| RP11-44N11.2 | MARCO    | 0.31636219  | 1.51E-11 |
| RP11-44N11.2 | PLXND1   | 0.439193571 | 0        |
| RP11-44N11.2 | EMILIN2  | 0.379592332 | 6.95E-17 |
| RP11-44N11.2 | PLAUR    | 0.450807195 | 0        |
| RP11-44N11.2 | CDC42EP5 | 0.589648017 | 0        |
| RP11-44N11.2 | TRPC5    | 0.430862324 | 2.86E-21 |
| RP11-44N11.2 | TMEM100  | 0.432330356 | 0        |
| RP11-44N11.2 | QSOX1    | 0.640999299 | 0        |
| RP11-44N11.2 | ARHGAP23 | 0.449326274 | 0        |
| RP11-44N11.2 | MDF1     | 0.550942933 | 0        |
| RP11-44N11.2 | FSTL3    | 0.541564946 | 0        |
| RP11-44N11.2 | INF2     | 0.530817095 | 0        |
| RP11-44N11.2 | TGFBR1   | 0.4872626   | 0        |

|              |           |             |          |
|--------------|-----------|-------------|----------|
| RP11-44N11.2 | TGFBI     | 0.338300422 | 4.41E-13 |
| RP11-44N11.2 | ERBB3     | 0.366562889 | 2.32E-15 |
| RP11-44N11.2 | CCL18     | 0.302577181 | 1.19E-10 |
| RP11-44N11.2 | CCL17     | 0.422628924 | 1.90E-20 |
| RP11-44N11.2 | C16orf45  | 0.565115158 | 0        |
| RP11-44N11.2 | PRDM1     | 0.365738106 | 2.77E-15 |
| RP11-44N11.2 | TRIM47    | 0.454921323 | 0        |
| RP11-44N11.2 | CNFN      | 0.504082782 | 0        |
| RP11-44N11.2 | ARMCX3    | 0.426515601 | 0        |
| RP11-44N11.2 | RAMP1     | 0.533374135 | 0        |
| RP11-44N11.2 | GABRD     | 0.394216165 | 0        |
| RP11-44N11.2 | COL13A1   | 0.464652769 | 0        |
| RP11-44N11.2 | S100A5    | 0.484033536 | 0        |
| RP11-44N11.2 | MISP      | 0.414655889 | 0        |
| RP11-44N11.2 | HES6      | 0.441196595 | 0        |
| RP11-44N11.2 | PSD3      | 0.390580738 | 0        |
| RP11-44N11.2 | DOK7      | 0.557100083 | 0        |
| RP11-44N11.2 | ZMAT3     | 0.379000871 | 8.79E-17 |
| RP11-44N11.2 | MFAP2     | 0.428967397 | 0        |
| RP11-44N11.2 | TMEM79    | 0.493403581 | 0        |
| RP11-44N11.2 | SLC1A5    | 0.381909099 | 1.94E-17 |
| RP11-44N11.2 | BBC3      | 0.581580746 | 0        |
| RP11-44N11.2 | HLA-DQB2  | 0.270126405 | 1.02E-08 |
| RP11-44N11.2 | C1QL1     | 0.488967908 | 0        |
| RP11-44N11.2 | TMEM215   | 0.503079962 | 1.54E-29 |
| RP11-44N11.2 | PNP       | 0.443826964 | 0        |
| RP11-44N11.2 | ARNTL     | 0.61714201  | 0        |
| RP11-44N11.2 | CLDN2     | 0.366520706 | 2.10E-15 |
| RP11-44N11.2 | MVP       | 0.542612839 | 0        |
| RP11-44N11.2 | LGALS1    | 0.612920086 | 0        |
| RP11-44N11.2 | BIRC7     | 0.343545378 | 1.32E-13 |
| RP11-44N11.2 | COL8A1    | 0.463287728 | 0        |
| RP11-44N11.2 | PERP      | 0.4047636   | 0        |
| RP11-44N11.2 | GJA4      | 0.545527733 | 0        |
| RP11-44N11.2 | IGFL2     | 0.505682869 | 7.08E-30 |
| RP11-44N11.2 | DAPK2     | 0.501041226 | 0        |
| RP11-44N11.2 | MAMLD1    | 0.570343983 | 0        |
| RP11-44N11.2 | ETV5      | 0.505944678 | 0        |
| RP11-44N11.2 | RUNX1     | 0.459953846 | 0        |
| RP11-44N11.2 | LONRF2    | 0.44221995  | 0        |
| RP11-44N11.2 | SPOCK1    | 0.398527731 | 0        |
| RP11-44N11.2 | XKRX      | 0.460071146 | 0        |
| RP11-44N11.2 | TGFB1     | 0.53849247  | 0        |
| RP11-44N11.2 | ERP27     | 0.339929422 | 3.35E-13 |
| RP11-44N11.2 | TNFRSF10C | 0.346584562 | 1.06E-13 |
| RP11-44N11.2 | PALM      | 0.594770039 | 0        |
| RP11-44N11.2 | TSC22D1   | 0.608491647 | 0        |
| RP11-44N11.2 | TGM2      | 0.32411912  | 4.48E-12 |
| RP11-44N11.2 | UBE2QL1   | 0.463999609 | 0        |
| RP11-44N11.2 | ECE1      | 0.664216903 | 0        |
| RP11-44N11.2 | COL8A2    | 0.602536899 | 0        |



|              |          |             |          |
|--------------|----------|-------------|----------|
| RP11-44N11.2 | HIST3H2A | 0.366119081 | 2.55E-15 |
| RP11-44N11.2 | TNFRSF21 | 0.460191849 | 0        |
| RP11-44N11.2 | SOX4     | 0.516006888 | 0        |
| RP11-44N11.2 | ELF3     | 0.402886102 | 0        |
| RP11-44N11.2 | TPD52L1  | 0.415953699 | 0        |
| RP11-44N11.2 | INHBB    | 0.521271882 | 0        |
| RP11-44N11.2 | HPN      | 0.383462074 | 1.10E-19 |
| RP11-44N11.2 | MMP7     | 0.304629885 | 7.03E-11 |
| RP11-44N11.2 | RAB27A   | 0.471607043 | 0        |
| RP11-44N11.2 | IGF2BP2  | 0.408768513 | 0        |
| RP11-44N11.2 | ITGB4    | 0.603639683 | 0        |
| RP11-44N11.2 | PPP1R1B  | 0.526217034 | 0        |
| RP11-44N11.2 | NPDC1    | 0.553177861 | 0        |
| RP11-44N11.2 | CCL13    | 0.454204426 | 9.89E-24 |
| RP11-44N11.2 | SPINT1   | 0.491933722 | 0        |
| RP11-44N11.2 | HEY2     | 0.479569638 | 0        |
| RP11-44N11.2 | CST2     | 0.466525451 | 4.15E-25 |
| RP11-44N11.2 | ADM      | 0.276340432 | 4.53E-09 |
| RP11-44N11.2 | VSTM2L   | 0.276395606 | 4.50E-09 |
| RP11-44N11.2 | FAM84A   | 0.471177702 | 0        |
| RP11-44N11.2 | P4HA2    | 0.400101981 | 0        |
| RP11-44N11.2 | LPL      | 0.565262385 | 0        |
| RP11-44N11.2 | TMEM173  | 0.534028288 | 0        |
| RP11-44N11.2 | DHRS3    | 0.565551449 | 0        |
| RP11-44N11.2 | SCN1B    | 0.483269885 | 0        |
| RP11-44N11.2 | GLT1D1   | 0.413424601 | 0        |
| RP11-44N11.2 | PHYHIP   | 0.371337127 | 7.94E-16 |
| RP11-44N11.2 | BHLHE40  | 0.360195111 | 8.52E-15 |
| RP11-44N11.2 | BID      | 0.560400633 | 0        |
| RP11-44N11.2 | POSTN    | 0.257484745 | 4.98E-08 |
| RP11-44N11.2 | ITGA3    | 0.484097646 | 0        |
| RP11-44N11.2 | RSP04    | 0.583535404 | 0        |
| RP11-44N11.2 | ADAMTS9  | 0.442917221 | 0        |
| RP11-44N11.2 | ABTB2    | 0.529417447 | 0        |
| RP11-44N11.2 | KCNQ3    | 0.526476879 | 0        |
| RP11-44N11.2 | ANXA1    | 0.517273777 | 0        |
| RP11-44N11.2 | S100A11  | 0.52539835  | 0        |
| RP11-44N11.2 | CEACAM6  | 0.380575606 | 1.41E-16 |
| RP11-44N11.2 | IER5L    | 0.504942173 | 0        |
| RP11-44N11.2 | KRT80    | 0.318515561 | 1.08E-11 |
| RP11-44N11.2 | CDH6     | 0.562005662 | 0        |
| RP11-44N11.2 | UNC5B    | 0.385570909 | 0        |
| RP11-44N11.2 | PLEKHN1  | 0.602743697 | 0        |
| RP11-44N11.2 | SYTL1    | 0.589579651 | 0        |
| RP11-44N11.2 | TMEM163  | 0.679385391 | 0        |
| RP11-44N11.2 | C4orf48  | 0.49564404  | 0        |
| RP11-44N11.2 | B3GNT7   | 0.419256376 | 0        |
| RP11-44N11.2 | BAIAP3   | 0.50476672  | 0        |
| RP11-44N11.2 | PHLDA2   | 0.510068167 | 0        |
| RP11-44N11.2 | GAP43    | 0.644310578 | 7.45E-53 |
| RP11-44N11.2 | S100A1   | 0.30322722  | 1.08E-10 |

|              |            |             |          |
|--------------|------------|-------------|----------|
| RP11-44N11.2 | PTPRE      | 0.521821359 | 0        |
| RP11-44N11.2 | CCND1      | 0.506774992 | 0        |
| RP11-44N11.2 | ST6GALNAC5 | 0.48782065  | 1.26E-27 |
| RP11-44N11.2 | KRT17      | 0.391124683 | 0        |
| RP11-44N11.2 | HPCAL4     | 0.52345206  | 0        |
| RP11-44N11.2 | GABBR2     | 0.401909695 | 0        |
| RP11-44N11.2 | DIRAS3     | 0.495106335 | 0        |
| RP11-44N11.2 | SERINC2    | 0.353100418 | 3.27E-14 |
| RP11-44N11.2 | PTCHD4     | 0.482736152 | 0        |
| RP11-44N11.2 | EPS8       | 0.436061807 | 0        |
| RP11-44N11.2 | LY6E       | 0.484510676 | 0        |
| RP11-44N11.2 | UPP1       | 0.594098866 | 0        |
| RP11-44N11.2 | AHNAK2     | 0.421518111 | 0        |
| RP11-44N11.2 | PLXNC1     | 0.344135886 | 1.62E-13 |
| RP11-44N11.2 | TNC        | 0.370707086 | 9.21E-16 |
| RP11-44N11.2 | DUSP4      | 0.41946587  | 0        |
| RP11-44N11.2 | NRCAM      | 0.421110755 | 0        |
| RP11-44N11.2 | NRP2       | 0.500269349 | 0        |
| RP11-44N11.2 | CTSC       | 0.471105081 | 0        |
| RP11-44N11.2 | AMIGO2     | 0.603973993 | 0        |
| RP11-44N11.2 | NAB2       | 0.487015945 | 0        |
| RP11-44N11.2 | TBC1D2     | 0.51844989  | 0        |
| RP11-44N11.2 | PHLDA3     | 0.491671182 | 0        |
| RP11-44N11.2 | PTP4A3     | 0.455105995 | 0        |
| RP11-44N11.2 | CRABP2     | 0.250608056 | 1.14E-07 |
| RP11-44N11.2 | GOS2       | 0.497147797 | 0        |
| RP11-44N11.2 | S100A6     | 0.557766718 | 0        |
| RP11-44N11.2 | FOXQ1      | 0.455120179 | 0        |
| RP11-44N11.2 | LRG1       | 0.53078036  | 0        |
| RP11-44N11.2 | LAMP5      | 0.530336551 | 0        |
| RP11-44N11.2 | ALDH3B1    | 0.434192677 | 0        |
| RP11-44N11.2 | CDH2       | 0.33027471  | 1.67E-12 |
| RP11-44N11.2 | SCG5       | 0.444851028 | 0        |
| RP11-44N11.2 | ZCCHC16    | 0.443610651 | 1.37E-22 |
| RP11-44N11.2 | GRB7       | 0.554148027 | 0        |
| RP11-44N11.2 | TIAM1      | 0.722973218 | 0        |
| RP11-44N11.2 | FXYS5      | 0.50984066  | 0        |
| RP11-44N11.2 | CLDN9      | 0.373967638 | 4.12E-16 |
| RP11-44N11.2 | FAM43A     | 0.437722862 | 0        |
| RP11-44N11.2 | CHST2      | 0.630112874 | 0        |
| RP11-44N11.2 | HMGA2      | 0.474761643 | 0        |
| RP11-44N11.2 | GALNT7     | 0.413279927 | 0        |
| RP11-44N11.2 | CBLN1      | 0.485940962 | 0        |
| RP11-44N11.2 | STRA6      | 0.567559295 | 0        |
| RP11-44N11.2 | MUC21      | 0.367897442 | 1.62E-15 |
| RP11-44N11.2 | PRR36      | 0.555840853 | 0        |
| RP11-44N11.2 | NFE2L3     | 0.472784008 | 0        |
| RP11-44N11.2 | NR1D1      | 0.248293416 | 1.50E-07 |
| RP11-44N11.2 | MUC1       | 0.367703543 | 1.82E-15 |
| RP11-44N11.2 | NAT8L      | 0.498108318 | 0        |
| RP11-44N11.2 | APOC1      | 0.413518071 | 0        |

|              |           |             |          |
|--------------|-----------|-------------|----------|
| RP11-44N11.2 | EVA1A     | 0.622929532 | 0        |
| RP11-44N11.2 | ENTPD1    | 0.416590406 | 0        |
| RP11-44N11.2 | COL1A1    | 0.414511782 | 0        |
| RP11-44N11.2 | FNDC4     | 0.47307605  | 0        |
| RP11-44N11.2 | FRMD3     | 0.371063949 | 8.47E-16 |
| RP11-44N11.2 | SHROOM4   | 0.498475535 | 0        |
| RP11-44N11.2 | NELL2     | 0.460913658 | 0        |
| RP11-44N11.2 | EPHB3     | 0.518561658 | 0        |
| RP11-44N11.2 | TMC6      | 0.539494691 | 0        |
| RP11-44N11.2 | NOD1      | 0.561292647 | 0        |
| RP11-44N11.2 | GGCT      | 0.548336392 | 0        |
| RP11-44N11.2 | ICAM1     | 0.392408026 | 0        |
| RP11-44N11.2 | PRSS23    | 0.546641013 | 0        |
| RP11-44N11.2 | CFI       | 0.513020223 | 0        |
| RP11-44N11.2 | CD55      | 0.494430056 | 0        |
| RP11-44N11.2 | RASD2     | 0.668075157 | 0        |
| RP11-44N11.2 | KLK11     | 0.459290221 | 2.71E-24 |
| RP11-44N11.2 | ICAM5     | 0.527321803 | 0        |
| RP11-44N11.2 | ADORA1    | 0.402972197 | 0        |
| RP11-44N11.2 | ITGA2     | 0.465434858 | 0        |
| RP11-44N11.2 | ABCC3     | 0.444500407 | 0        |
| RP11-44N11.2 | MFGE8     | 0.607785298 | 0        |
| RP11-44N11.2 | STK32A    | 0.523307245 | 0        |
| RP11-44N11.2 | CYSLTR2   | 0.617223141 | 0        |
| RP11-44N11.2 | LAD1      | 0.454635521 | 0        |
| RP11-44N11.2 | MGAT3     | 0.51023979  | 0        |
| RP11-44N11.2 | IGFBP6    | 0.600588908 | 0        |
| RP11-44N11.2 | CYP2S1    | 0.4358204   | 0        |
| RP11-44N11.2 | KCNJ2     | 0.534630954 | 0        |
| RP11-44N11.2 | FAM20A    | 0.558193647 | 0        |
| RP11-44N11.2 | TGFA      | 0.489570007 | 0        |
| RP11-44N11.2 | MXRA8     | 0.684024742 | 0        |
| RP11-44N11.2 | C8orf4    | 0.448152288 | 0        |
| RP11-44N11.2 | CLDN10    | 0.556028056 | 5.46E-37 |
| RP11-44N11.2 | PDE5A     | 0.432248941 | 0        |
| RP11-44N11.2 | APOE      | 0.420684818 | 0        |
| RP11-44N11.2 | SPOCK2    | 0.441736569 | 0        |
| RP11-44N11.2 | TENM1     | 0.416278222 | 0        |
| RP11-44N11.2 | SLIT1     | 0.484055521 | 0        |
| RP11-44N11.2 | CXCL14    | 0.535395598 | 0        |
| RP11-44N11.2 | ECM1      | 0.421267627 | 0        |
| RP11-44N11.2 | DUSP5     | 0.498565459 | 0        |
| RP11-44N11.2 | SEZ6L2    | 0.339380938 | 3.68E-13 |
| RP11-44N11.2 | THRSP     | 0.22036228  | 3.33E-06 |
| RP11-44N11.2 | C19orf33  | 0.544120142 | 0        |
| RP11-44N11.2 | MPZL2     | 0.445536953 | 0        |
| RP11-44N11.2 | CTSH      | 0.468220823 | 0        |
| RP11-44N11.2 | CYP1B1    | 0.425801876 | 0        |
| RP11-44N11.2 | ALOX5     | 0.371830862 | 7.05E-16 |
| RP11-44N11.2 | SYTL5     | 0.564498966 | 2.62E-38 |
| RP11-44N11.2 | TNFRSF12A | 0.570373486 | 0        |

|              |          |             |          |
|--------------|----------|-------------|----------|
| RP11-44N11.2 | DUSP6    | 0.650549335 | 0        |
| RP11-44N11.2 | ALOX15B  | 0.423691765 | 0        |
| RP11-44N11.2 | SDC4     | 0.656157575 | 0        |
| RP11-44N11.2 | MDK      | 0.625547704 | 0        |
| RP11-44N11.2 | KRT19    | 0.502594343 | 0        |
| RP11-44N11.2 | MET      | 0.449614487 | 0        |
| RP11-44N11.2 | TESC     | 0.555188686 | 0        |
| RP11-44N11.2 | CXCL17   | 0.373311584 | 5.78E-16 |
| RP11-44N11.2 | NPC2     | 0.560428291 | 0        |
| RP11-44N11.2 | COMP     | 0.54148807  | 0        |
| RP11-44N11.2 | TUSC3    | 0.619947832 | 0        |
| RP11-44N11.2 | TMPRSS4  | 0.577577393 | 0        |
| RP11-44N11.2 | LGALS3   | 0.492042511 | 0        |
| RP11-44N11.2 | CRLF1    | 0.590033956 | 0        |
| RP11-44N11.2 | CTXN1    | 0.711788368 | 0        |
| RP11-44N11.2 | PCSK1N   | 0.543096503 | 0        |
| RP11-44N11.2 | NMU      | 0.263293297 | 2.14E-08 |
| RP11-44N11.2 | GALE     | 0.519809967 | 0        |
| RP11-44N11.2 | PCSK2    | 0.338507788 | 4.26E-13 |
| RP11-44N11.2 | GJB3     | 0.609804634 | 0        |
| RP11-44N11.2 | SLPI     | 0.476773461 | 0        |
| RP11-44N11.2 | AGR2     | 0.553594011 | 0        |
| RP11-44N11.2 | MRC2     | 0.696829656 | 0        |
| RP11-44N11.2 | GOLT1A   | 0.583676106 | 0        |
| RP11-44N11.2 | SLC27A6  | 0.550575878 | 3.69E-36 |
| RP11-44N11.2 | KCNN4    | 0.597657702 | 0        |
| RP11-44N11.2 | ETV4     | 0.613540007 | 9.42E-47 |
| RP11-44N11.2 | SYT12    | 0.601021086 | 0        |
| RP11-44N11.2 | PVRL4    | 0.467643121 | 0        |
| RP11-44N11.2 | PLCD3    | 0.517082013 | 0        |
| RP11-44N11.2 | PLAU     | 0.511887937 | 0        |
| RP11-44N11.2 | LRRK2    | 0.32526715  | 3.74E-12 |
| RP11-44N11.2 | SFN      | 0.467331646 | 0        |
| RP11-44N11.2 | LPAR5    | 0.513932661 | 0        |
| RP11-44N11.2 | NGEF     | 0.480099399 | 0        |
| RP11-44N11.2 | DTX4     | 0.526375749 | 0        |
| RP11-44N11.2 | CST6     | 0.644329777 | 0        |
| RP11-44N11.2 | QPCT     | 0.528907968 | 0        |
| RP11-44N11.2 | TIMP1    | 0.650125384 | 0        |
| RP11-44N11.2 | CAMK2N1  | 0.55652777  | 0        |
| RP11-44N11.2 | KLHDC8A  | 0.585258158 | 0        |
| RP11-44N11.2 | PDLIM4   | 0.573867218 | 0        |
| RP11-44N11.2 | SCEL     | 0.435043133 | 0        |
| RP11-44N11.2 | LCN2     | 0.3879698   | 0        |
| RP11-44N11.2 | PROS1    | 0.415977527 | 0        |
| RP11-44N11.2 | GABRB2   | 0.573699424 | 0        |
| RP11-44N11.2 | TMPRSS6  | 0.531481886 | 0        |
| RP11-44N11.2 | KLK7     | 0.43098461  | 2.78E-21 |
| RP11-44N11.2 | PDZK1IP1 | 0.364207258 | 3.81E-15 |
| RP11-44N11.2 | CDH3     | 0.607919476 | 0        |
| RP11-44N11.2 | LRP4     | 0.536076842 | 0        |

|              |           |              |             |
|--------------|-----------|--------------|-------------|
| RP11-44N11.2 | IGSF1     | 0.59695504   | 0           |
| RP11-44N11.2 | B3GNT3    | 0.440023318  | 0           |
| RP11-44N11.2 | CLDN1     | 0.521048772  | 0           |
| RP11-44N11.2 | GDF15     | 0.374844476  | 3.26E-16    |
| RP11-44N11.2 | ARHGAP36  | 0.576293667  | 3.28E-40    |
| RP11-44N11.2 | LAMB3     | 0.550715994  | 0           |
| RP11-44N11.2 | KLK10     | 0.544794577  | 0           |
| RP11-44N11.2 | DPP4      | 0.42869124   | 0           |
| RP11-44N11.2 | METTL7B   | 0.546970075  | 0           |
| RP11-44N11.2 | LIPH      | 0.58127608   | 0           |
| RP11-44N11.2 | CLDN16    | 0.445039388  | 0           |
| RP11-44N11.2 | CHI3L1    | 0.356375154  | 1.78E-14    |
| RP11-44N11.2 | SLC22A31  | 0.621740307  | 2.60E-48    |
| RP11-44N11.2 | TACSTD2   | 0.555211805  | 0           |
| RP11-44N11.2 | SFTPB     | 0.466986982  | 0           |
| RP11-44N11.2 | RXRG      | 0.549451232  | 0           |
| RP11-44N11.2 | DCSTAMP   | 0.465237857  | 5.81E-25    |
| RP11-44N11.2 | CITED1    | 0.44348074   | 0           |
| RP11-44N11.2 | SERPINA1  | 0.510409002  | 0           |
| RP11-44N11.2 | PRR15     | 0.735319431  | 0           |
| RP11-44N11.2 | SLC34A2   | 0.321863201  | 6.40E-12    |
| RP11-44N11.2 | FN1       | 0.418864622  | 0           |
| RP11-44N11.2 | ZCCHC12   | 0.579258022  | 0           |
| LINC01314    | TFF3      | -0.328988531 | 2.06E-12    |
| LINC01314    | CCL21     | -0.307461877 | 4.59E-11    |
| LINC01314    | TPO       | -0.34194663  | 2.37E-13    |
| LINC01314    | MT1G      | -0.345497097 | 1.28E-13    |
| LINC01314    | DIO1      | -0.353099709 | 3.27E-14    |
| LINC01314    | DPT       | -0.310051256 | 3.09E-11    |
| LINC01314    | CDH16     | -0.422013974 | 0           |
| LINC01314    | CRABP1    | -0.150050884 | 0.001617018 |
| LINC01314    | SLC26A7   | -0.229102568 | 1.31E-06    |
| LINC01314    | MT1H      | -0.34345696  | 1.34E-13    |
| LINC01314    | SLC26A4   | -0.163547006 | 0.000590497 |
| LINC01314    | SLC5A8    | -0.311380024 | 2.52E-11    |
| LINC01314    | PKHD1L1   | -0.409908462 | 3.22E-19    |
| LINC01314    | TFCP2L1   | -0.395885588 | 0           |
| LINC01314    | WSCD2     | -0.304355616 | 7.32E-11    |
| LINC01314    | IPCEF1    | -0.343661299 | 1.76E-13    |
| LINC01314    | SLC5A5    | -0.361290496 | 5.55E-15    |
| LINC01314    | MT1F      | -0.419508988 | 0           |
| LINC01314    | FOSB      | -0.129678001 | 0.006544921 |
| LINC01314    | SEMA3D    | -0.354464762 | 1.92E-14    |
| LINC01314    | BMP8A     | -0.222902867 | 2.55E-06    |
| LINC01314    | MATN2     | -0.247684509 | 1.61E-07    |
| LINC01314    | PLA2R1    | -0.328508129 | 2.22E-12    |
| LINC01314    | COL23A1   | -0.187628965 | 7.87E-05    |
| LINC01314    | HGD       | -0.301798211 | 1.33E-10    |
| LINC01314    | TCEAL2    | -0.200336721 | 2.44E-05    |
| LINC01314    | CHRD1     | -0.287183394 | 8.81E-10    |
| LINC01314    | TNFRSF11B | -0.312811581 | 2.59E-11    |

|           |            |              |             |
|-----------|------------|--------------|-------------|
| LINC01314 | FAM167A    | -0.127329888 | 0.007594017 |
| LINC01314 | KIT        | -0.317783256 | 1.21E-11    |
| LINC01314 | SLC4A4     | -0.325478771 | 3.61E-12    |
| LINC01314 | SMOC2      | -0.198775378 | 2.83E-05    |
| LINC01314 | FHL1       | -0.212188348 | 7.68E-06    |
| LINC01314 | OTOS       | -0.414250235 | 0           |
| LINC01314 | IGFBPL1    | -0.273509118 | 5.69E-09    |
| LINC01314 | HBB        | -0.189995092 | 6.36E-05    |
| LINC01314 | BEX1       | -0.003364802 | 0.943933316 |
| LINC01314 | FABP4      | -0.200970762 | 2.21E-05    |
| LINC01314 | LMOD1      | -0.170754886 | 0.000331875 |
| LINC01314 | SOD3       | -0.336897795 | 5.59E-13    |
| LINC01314 | TMEM171    | -0.451124059 | 0           |
| LINC01314 | PI16       | -0.213530128 | 6.71E-06    |
| LINC01314 | ZMAT4      | -0.356096528 | 1.43E-14    |
| LINC01314 | MFAP4      | -0.039149459 | 0.41306749  |
| LINC01314 | CWH43      | -0.421550323 | 2.43E-20    |
| LINC01314 | SPX        | -0.1485578   | 0.001819594 |
| LINC01314 | APOD       | -0.247341263 | 1.68E-07    |
| LINC01314 | DPP6       | -0.315952138 | 1.60E-11    |
| LINC01314 | MMRN1      | -0.288456301 | 8.82E-10    |
| LINC01314 | WDR72      | -0.194864787 | 4.08E-05    |
| LINC01314 | MPPED2     | -0.177335987 | 0.0001922   |
| LINC01314 | PAPSS2     | -0.406835982 | 0           |
| LINC01314 | DCN        | -0.266360062 | 1.65E-08    |
| LINC01314 | SORBS2     | -0.241305242 | 3.37E-07    |
| LINC01314 | EGR2       | -0.008199888 | 0.863918485 |
| LINC01314 | EDN3       | -0.039448734 | 0.409651438 |
| LINC01314 | DIO2       | -0.101307455 | 0.033872025 |
| LINC01314 | ITPR1      | -0.26117322  | 3.16E-08    |
| LINC01314 | CFD        | -0.256601384 | 5.54E-08    |
| LINC01314 | CPXM1      | -0.2443007   | 2.39E-07    |
| LINC01314 | ELMO1      | -0.298710559 | 2.08E-10    |
| LINC01314 | GPC3       | -0.287951017 | 7.91E-10    |
| LINC01314 | MYOC       | 0.058220189  | 0.223450795 |
| LINC01314 | DEPTOR     | -0.357745726 | 1.37E-14    |
| LINC01314 | DGKI       | -0.339210733 | 3.78E-13    |
| LINC01314 | CARTPT     | -0.176437278 | 0.000202867 |
| LINC01314 | IYD        | -0.2812853   | 2.35E-09    |
| LINC01314 | LYVE1      | -0.278890238 | 3.23E-09    |
| LINC01314 | CLCNKB     | -0.162032328 | 0.000664569 |
| LINC01314 | NCAM1      | -0.452287691 | 0           |
| LINC01314 | HBA2       | -0.18001841  | 0.000152986 |
| LINC01314 | GLT8D2     | -0.217165555 | 4.63E-06    |
| LINC01314 | OGDHL      | -0.275689825 | 4.94E-09    |
| LINC01314 | LIFR       | -0.155363855 | 0.001104861 |
| LINC01314 | CSGALNACT1 | -0.410062777 | 0           |
| LINC01314 | RAP1GAP    | -0.229274475 | 1.29E-06    |
| LINC01314 | COL9A3     | -0.153530184 | 0.001266306 |
| LINC01314 | FBLN1      | -0.292258955 | 5.20E-10    |
| LINC01314 | EFEMP1     | -0.402105572 | 0           |

|           |          |              |             |
|-----------|----------|--------------|-------------|
| LINC01314 | AOX1     | -0.362770177 | 4.22E-15    |
| LINC01314 | GRIN2C   | -0.347496716 | 9.00E-14    |
| LINC01314 | C11orf74 | -0.263029868 | 2.51E-08    |
| LINC01314 | PPARGC1A | -0.381322887 | 2.93E-17    |
| LINC01314 | ANGPTL1  | -0.127988012 | 0.007285778 |
| LINC01314 | SCARA5   | -0.275526159 | 4.35E-09    |
| LINC01314 | LTF      | -0.233302649 | 8.29E-07    |
| LINC01314 | CA4      | 0.002172449  | 0.963797932 |
| LINC01314 | TG       | 0.015639671  | 0.743742251 |
| LINC01314 | FCGBP    | -0.285535166 | 1.32E-09    |
| LINC01314 | PBX4     | -0.235429213 | 6.55E-07    |
| LINC01314 | CYR61    | -0.141026674 | 0.003087661 |
| LINC01314 | FOS      | -0.150591177 | 0.00157092  |
| LINC01314 | KHDRBS2  | -0.207336384 | 1.24E-05    |
| LINC01314 | MUM1L1   | -0.406535146 | 0           |
| LINC01314 | RGS16    | -0.23178485  | 9.80E-07    |
| LINC01314 | MT1M     | -0.419872517 | 0           |
| LINC01314 | LRP2     | -0.295090733 | 3.49E-10    |
| LINC01314 | MAFB     | -0.352111529 | 3.92E-14    |
| LINC01314 | KCNK2    | -0.307692111 | 5.59E-11    |
| LINC01314 | TBC1D4   | -0.190246428 | 6.22E-05    |
| LINC01314 | MIOX     | -0.268116086 | 1.15E-08    |
| LINC01314 | TPPP     | -0.311013086 | 3.40E-11    |
| LINC01314 | FMOD     | -0.370008397 | 1.08E-15    |
| LINC01314 | CITED2   | -0.38405935  | 0           |
| LINC01314 | RGS8     | -0.232069996 | 8.84E-07    |
| LINC01314 | ABI3BP   | -0.278816057 | 3.26E-09    |
| LINC01314 | ADH1B    | -0.226518604 | 1.63E-06    |
| LINC01314 | OGN      | -0.261372413 | 2.73E-08    |
| LINC01314 | NR4A1    | -0.111220877 | 0.019798692 |
| LINC01314 | FOXJ1    | -0.106962847 | 0.025015461 |
| LINC01314 | ALDH1A1  | -0.198936647 | 2.79E-05    |
| LINC01314 | OCA2     | -0.296964861 | 2.18E-10    |
| LINC01314 | TMEM139  | -0.334117787 | 8.88E-13    |
| LINC01314 | ARHGAP24 | -0.32450818  | 4.22E-12    |
| LINC01314 | SLC25A15 | -0.304706582 | 8.69E-11    |
| LINC01314 | DES      | -0.271048143 | 7.87E-09    |
| LINC01314 | GDF10    | -0.244563594 | 2.12E-07    |
| LINC01314 | KIAA1324 | -0.26888604  | 1.19E-08    |
| LINC01314 | JUN      | -0.178949951 | 0.000167608 |
| LINC01314 | C7       | -0.191973437 | 5.32E-05    |
| LINC01314 | LGI3     | -0.203781945 | 1.76E-05    |
| LINC01314 | CDON     | -0.213149862 | 6.97E-06    |
| LINC01314 | BCL2     | -0.324398398 | 4.29E-12    |
| LINC01314 | HLF      | -0.139391575 | 0.00345223  |
| LINC01314 | EGR1     | -0.051453263 | 0.281938686 |
| LINC01314 | IP6K3    | -0.352277621 | 3.81E-14    |
| LINC01314 | SCUBE3   | -0.272989813 | 7.03E-09    |
| LINC01314 | PKNOX2   | -0.167857437 | 0.000419533 |
| LINC01314 | SMAD9    | -0.403396006 | 0           |
| LINC01314 | IQGAP2   | -0.325865277 | 3.40E-12    |

|           |          |              |             |
|-----------|----------|--------------|-------------|
| LINC01314 | GNA14    | -0.257496943 | 4.97E-08    |
| LINC01314 | LAYN     | -0.198220086 | 2.98E-05    |
| LINC01314 | AVPR1A   | -0.179256036 | 0.00016329  |
| LINC01314 | PDLIM3   | -0.435123696 | 0           |
| LINC01314 | GPM6A    | -0.208627385 | 1.10E-05    |
| LINC01314 | SDPR     | 0.012475427  | 0.794279379 |
| LINC01314 | CRYAB    | -0.276207389 | 4.61E-09    |
| LINC01314 | FOXA2    | -0.28321201  | 1.53E-09    |
| LINC01314 | C8orf88  | -0.212300967 | 7.59E-06    |
| LINC01314 | ISM1     | -0.218514143 | 4.03E-06    |
| LINC01314 | BMP2     | -0.409518974 | 0           |
| LINC01314 | ID4      | -0.284092682 | 1.60E-09    |
| LINC01314 | NUPR1    | -0.306372459 | 6.80E-11    |
| LINC01314 | SERTM1   | -0.402539972 | 1.57E-18    |
| LINC01314 | IRS1     | -0.147705217 | 0.00193421  |
| LINC01314 | FIBIN    | -0.356450895 | 1.75E-14    |
| LINC01314 | PODN     | -0.264771061 | 2.01E-08    |
| LINC01314 | TDRD9    | -0.372333391 | 6.24E-16    |
| LINC01314 | EPHA3    | -0.251466738 | 1.03E-07    |
| LINC01314 | AIF1L    | -0.264606246 | 2.06E-08    |
| LINC01314 | EBF4     | -0.258989921 | 4.14E-08    |
| LINC01314 | ADM2     | -0.422257224 | 0           |
| LINC01314 | GSTM3    | -0.1730969   | 0.000273851 |
| LINC01314 | HSD17B6  | -0.315935544 | 1.61E-11    |
| LINC01314 | AGR3     | -0.310869052 | 2.73E-11    |
| LINC01314 | EPHB1    | -0.198120942 | 3.01E-05    |
| LINC01314 | TMOD1    | -0.213917485 | 6.45E-06    |
| LINC01314 | WASF3    | -0.204461487 | 1.65E-05    |
| LINC01314 | SELV     | -0.28796334  | 7.90E-10    |
| LINC01314 | ENPP1    | -0.190524003 | 6.07E-05    |
| LINC01314 | SYNE1    | -0.268793926 | 1.06E-08    |
| LINC01314 | PLCH1    | -0.244273184 | 2.40E-07    |
| LINC01314 | CCDC146  | -0.215217138 | 5.65E-06    |
| LINC01314 | SLC16A2  | -0.162140975 | 0.000658982 |
| LINC01314 | IER2     | -0.143736189 | 0.002559883 |
| LINC01314 | KCNAB1   | 0.005872341  | 0.90231431  |
| LINC01314 | SYNDIG1  | -0.264214634 | 2.16E-08    |
| LINC01314 | C16orf89 | -0.073670064 | 0.123224026 |
| LINC01314 | CTGF     | -0.126554606 | 0.007972049 |
| LINC01314 | NR4A3    | -0.210078237 | 9.48E-06    |
| LINC01314 | KIAA1456 | -0.222015108 | 2.80E-06    |
| LINC01314 | AQP4     | -0.119680186 | 0.012131027 |
| LINC01314 | RNF150   | -0.268297132 | 1.29E-08    |
| LINC01314 | C1S      | -0.270851051 | 9.27E-09    |
| LINC01314 | PFKFB2   | -0.241056034 | 3.47E-07    |
| LINC01314 | PROX1    | -0.234585141 | 7.20E-07    |
| LINC01314 | TCF7L1   | -0.212744917 | 7.26E-06    |
| LINC01314 | HSPB6    | -0.133748302 | 0.00503038  |
| LINC01314 | FHDC1    | -0.181099351 | 0.000139419 |
| LINC01314 | PRR15L   | -0.19765217  | 3.15E-05    |
| LINC01314 | SLC1A1   | -0.287876188 | 9.56E-10    |



|           |          |              |             |
|-----------|----------|--------------|-------------|
| LINC01314 | BTBD11   | -0.072905562 | 0.127171037 |
| LINC01314 | TRIM58   | -0.284801442 | 1.46E-09    |
| LINC01314 | LRIG1    | -0.339161799 | 3.81E-13    |
| LINC01314 | ROR2     | -0.385658138 | 0           |
| LINC01314 | GPR125   | -0.322039221 | 6.23E-12    |
| LINC01314 | FLRT1    | -0.184576914 | 0.000103043 |
| LINC01314 | PGF      | -0.194146382 | 4.36E-05    |
| LINC01314 | DUSP1    | -0.208820568 | 1.07E-05    |
| LINC01314 | PLA2G7   | -0.336232012 | 6.25E-13    |
| LINC01314 | PLSCR4   | -0.266271839 | 1.67E-08    |
| LINC01314 | FAM46B   | -0.369145034 | 1.32E-15    |
| LINC01314 | GLDC     | -0.333147621 | 1.04E-12    |
| LINC01314 | ZBTB16   | -0.231227856 | 1.04E-06    |
| LINC01314 | OMD      | -0.254914872 | 6.11E-08    |
| LINC01314 | HSD11B2  | -0.063896351 | 0.181371002 |
| LINC01314 | FGL2     | -0.238751464 | 4.51E-07    |
| LINC01314 | CLCNKA   | -0.184265163 | 0.000103143 |
| LINC01314 | GATM     | -0.064053223 | 0.180299941 |
| LINC01314 | TNS3     | -0.383327329 | 1.45E-18    |
| LINC01314 | TOB1     | -0.35119512  | 4.64E-14    |
| LINC01314 | MARC2    | -0.183241943 | 0.000115799 |
| LINC01314 | LRRC2    | -0.341123549 | 2.73E-13    |
| LINC01314 | SORD     | -0.244226945 | 2.41E-07    |
| LINC01314 | RIMS4    | -0.001103635 | 0.98159777  |
| LINC01314 | SLC29A4  | -0.323280296 | 5.12E-12    |
| LINC01314 | SLC39A14 | -0.202930781 | 1.91E-05    |
| LINC01314 | FAXDC2   | -0.198880905 | 2.80E-05    |
| LINC01314 | HSPB8    | -0.429802393 | 0           |
| LINC01314 | CCL19    | -0.171508039 | 0.000306161 |
| LINC01314 | KCNIP3   | -0.062805624 | 0.18894858  |
| LINC01314 | CGNL1    | -0.139031593 | 0.003537566 |
| LINC01314 | ATF3     | -0.159852433 | 0.000786387 |
| LINC01314 | SGCD     | -0.451100656 | 0           |
| LINC01314 | STARD13  | -0.307934936 | 5.39E-11    |
| LINC01314 | LDHD     | -0.195459935 | 3.86E-05    |
| LINC01314 | RCAN1    | -0.305164857 | 8.13E-11    |
| LINC01314 | ID3      | -0.450116306 | 0           |
| LINC01314 | SYTL3    | -0.206126513 | 1.40E-05    |
| LINC01314 | MT1E     | -0.397078297 | 0           |
| LINC01314 | CAMK1D   | -0.116776921 | 0.014399535 |
| LINC01314 | PRKCQ    | -0.211718726 | 8.05E-06    |
| LINC01314 | NUAK2    | -0.446740299 | 0           |
| LINC01314 | LIPG     | 0.010791253  | 0.821548556 |
| LINC01314 | SLC25A25 | -0.347125103 | 9.61E-14    |
| LINC01314 | PRKX     | -0.302275919 | 1.24E-10    |
| LINC01314 | SRPX     | -0.187593081 | 7.89E-05    |
| LINC01314 | FAM189A1 | -0.017266401 | 0.718168566 |
| LINC01314 | PLEKHH1  | -0.197845919 | 3.09E-05    |
| LINC01314 | WNT11    | -0.28739465  | 1.02E-09    |
| LINC01314 | SNAI1    | -0.369833795 | 1.13E-15    |
| LINC01314 | FDCSP    | -0.124110082 | 0.009239788 |

|           |          |              |             |
|-----------|----------|--------------|-------------|
| LINC01314 | MT1X     | -0.204181642 | 1.69E-05    |
| LINC01314 | ACACB    | -0.210642891 | 8.97E-06    |
| LINC01314 | ARC      | 0.120779991  | 0.011357946 |
| LINC01314 | KLK4     | -0.456229358 | 5.92E-24    |
| LINC01314 | ZFPM2    | -0.233296834 | 8.30E-07    |
| LINC01314 | AKAP12   | -0.108568523 | 0.022946853 |
| LINC01314 | GJB6     | -0.272262795 | 6.70E-09    |
| LINC01314 | ERO1LB   | -0.234259341 | 7.46E-07    |
| LINC01314 | DNALI1   | -0.239094852 | 4.34E-07    |
| LINC01314 | HKDC1    | -0.394464239 | 0           |
| LINC01314 | ZFP36L2  | -0.363155394 | 4.72E-15    |
| LINC01314 | CAPSL    | -0.105630569 | 0.026891387 |
| LINC01314 | CYP7B1   | -0.263119935 | 2.48E-08    |
| LINC01314 | CPQ      | -0.210704165 | 8.91E-06    |
| LINC01314 | RPS6KA6  | -0.165764494 | 0.000487731 |
| LINC01314 | TLE1     | -0.528467847 | 0           |
| LINC01314 | TP53INP2 | -0.212737825 | 7.27E-06    |
| LINC01314 | KATNAL2  | -0.159416142 | 0.000813125 |
| LINC01314 | SGPP2    | -0.42043093  | 0           |
| LINC01314 | CTH      | -0.455470658 | 0           |
| LINC01314 | KIF12    | -0.30317318  | 1.09E-10    |
| LINC01314 | TMEM220  | -0.203839957 | 1.75E-05    |
| LINC01314 | CENPJ    | -0.420396889 | 0           |
| LINC01314 | FAM155B  | 0.148146189  | 0.001874128 |
| LINC01314 | WFS1     | -0.360689555 | 7.73E-15    |
| LINC01314 | SELENBP1 | -0.074582928 | 0.118636775 |
| LINC01314 | SNTA1    | -0.337042753 | 5.45E-13    |
| LINC01314 | FRAS1    | -0.522856203 | 0           |
| LINC01314 | FBLN7    | -0.366322901 | 2.44E-15    |
| LINC01314 | AGPAT9   | -0.135147667 | 0.004587786 |
| LINC01314 | GPR83    | -0.084957179 | 0.075379813 |
| LINC01314 | PRTG     | -0.168043669 | 0.000413306 |
| LINC01314 | EGR3     | 0.045643047  | 0.339896113 |
| LINC01314 | GRAMD2   | -0.420968492 | 0           |
| LINC01314 | HYOU1    | -0.251590845 | 1.01E-07    |
| LINC01314 | FBLN5    | -0.176734172 | 0.000202206 |
| LINC01314 | ITM2A    | -0.086092869 | 0.071548055 |
| LINC01314 | SRF      | -0.220205976 | 3.38E-06    |
| LINC01314 | FGFR2    | -0.12219666  | 0.010426593 |
| LINC01314 | MT1A     | -0.293045098 | 3.84E-10    |
| LINC01314 | MAMDC2   | -0.257744449 | 4.82E-08    |
| LINC01314 | FHL2     | -0.397590471 | 0           |
| LINC01314 | FTCDNL1  | -0.311977011 | 2.94E-11    |
| LINC01314 | PKIA     | 0.108907939  | 0.022521193 |
| LINC01314 | DNAJB4   | -0.128585997 | 0.007015465 |
| LINC01314 | SLC25A33 | -0.341194893 | 2.70E-13    |
| LINC01314 | EYA2     | -0.361346971 | 6.79E-15    |
| LINC01314 | LPAR1    | -0.480490444 | 0           |
| LINC01314 | STX11    | -0.305108406 | 8.19E-11    |
| LINC01314 | ARHGEF28 | -0.41660927  | 0           |
| LINC01314 | OR2W3    | -0.241924928 | 3.14E-07    |

|           |          |              |             |
|-----------|----------|--------------|-------------|
| LINC01314 | ALDH1B1  | -0.279701982 | 2.47E-09    |
| LINC01314 | CXCL12   | -0.131521317 | 0.005814531 |
| LINC01314 | OLFM2    | -0.150612453 | 0.001568492 |
| LINC01314 | TUB      | -0.10147     | 0.033585834 |
| LINC01314 | HTRA3    | -0.309719389 | 4.13E-11    |
| LINC01314 | CKB      | -0.336774255 | 5.70E-13    |
| LINC01314 | RGS2     | -0.297420975 | 2.50E-10    |
| LINC01314 | SHANK2   | -0.225472389 | 1.94E-06    |
| LINC01314 | CNTFR    | -0.022871397 | 0.63271766  |
| LINC01314 | CYTH3    | -0.222428564 | 2.68E-06    |
| LINC01314 | PLAC9    | -0.111367395 | 0.019636319 |
| LINC01314 | WVOX     | -0.093470528 | 0.050359441 |
| LINC01314 | NPR3     | -0.176902674 | 0.000199356 |
| LINC01314 | SDC2     | -0.189037408 | 6.94E-05    |
| LINC01314 | KLF15    | -0.086926304 | 0.068838588 |
| LINC01314 | TMEM164  | -0.335823095 | 6.69E-13    |
| LINC01314 | LONRF3   | -0.105027559 | 0.027819506 |
| LINC01314 | GBP1     | -0.235348508 | 6.61E-07    |
| LINC01314 | ARHGAP6  | -0.327962339 | 2.43E-12    |
| LINC01314 | TMEM119  | -0.187259054 | 8.13E-05    |
| LINC01314 | SH3RF1   | -0.292402778 | 5.09E-10    |
| LINC01314 | CRELD2   | -0.271498963 | 8.53E-09    |
| LINC01314 | PCP4     | -0.125056664 | 0.008750365 |
| LINC01314 | GCSH     | -0.125809394 | 0.00835117  |
| LINC01314 | IMPA2    | -0.284372952 | 1.54E-09    |
| LINC01314 | C1R      | -0.297155173 | 2.60E-10    |
| LINC01314 | SUCNR1   | -0.134439758 | 0.004807087 |
| LINC01314 | SFRP1    | -0.184842575 | 0.000100668 |
| LINC01314 | UGT8     | -0.298663611 | 2.09E-10    |
| LINC01314 | TLE4     | -0.262483086 | 2.68E-08    |
| LINC01314 | ANTXR1   | -0.267566103 | 1.41E-08    |
| LINC01314 | GPX3     | -0.404717503 | 0           |
| LINC01314 | DPY19L2  | -0.268780938 | 1.21E-08    |
| LINC01314 | FAM46C   | -0.253422104 | 8.14E-08    |
| LINC01314 | IL33     | -0.181158929 | 0.000135356 |
| LINC01314 | PEG3     | -0.1455344   | 0.002256518 |
| LINC01314 | FAHD2A   | -0.292571848 | 4.97E-10    |
| LINC01314 | PTGDS    | 0.000944919  | 0.984244027 |
| LINC01314 | CHCHD10  | -0.330158262 | 1.70E-12    |
| LINC01314 | CD36     | -0.082694877 | 0.083510417 |
| LINC01314 | ANKRD37  | -0.249045152 | 1.37E-07    |
| LINC01314 | TSPAN33  | -0.281202751 | 2.37E-09    |
| LINC01314 | PRDM16   | -0.18451408  | 0.000103613 |
| LINC01314 | UST      | 0.074089051  | 0.1211017   |
| LINC01314 | NEXN     | -0.192435826 | 5.10E-05    |
| LINC01314 | NUPR1L   | -0.070595769 | 0.139736921 |
| LINC01314 | SLC24A3  | -0.455614055 | 0           |
| LINC01314 | MARC1    | -0.034469969 | 0.471140349 |
| LINC01314 | MYH11    | -0.117602555 | 0.013719222 |
| LINC01314 | APOA1    | -0.26230509  | 2.43E-08    |
| LINC01314 | TMEM178B | -0.291543528 | 5.74E-10    |

|           |          |              |             |
|-----------|----------|--------------|-------------|
| LINC01314 | CAPN6    | -0.214373076 | 5.85E-06    |
| LINC01314 | PPM1L    | -0.183342647 | 0.000114787 |
| LINC01314 | FZD8     | -0.339611281 | 3.53E-13    |
| LINC01314 | RCAN2    | -0.130609304 | 0.006166207 |
| LINC01314 | COPZ2    | -0.339906161 | 3.36E-13    |
| LINC01314 | GAS1     | -0.301204339 | 1.45E-10    |
| LINC01314 | DACT1    | -0.315901928 | 1.62E-11    |
| LINC01314 | WBSCR17  | -0.186485758 | 8.71E-05    |
| LINC01314 | NCS1     | -0.292660779 | 4.91E-10    |
| LINC01314 | SPIRE2   | -0.435792742 | 0           |
| LINC01314 | C15orf52 | -0.473912606 | 0           |
| LINC01314 | SPAG5    | -0.483926449 | 0           |
| LINC01314 | ARL4D    | -0.277805751 | 3.73E-09    |
| LINC01314 | FAM189A2 | -0.082369219 | 0.084737083 |
| LINC01314 | MAP1LC3A | -0.160845434 | 0.000728536 |
| LINC01314 | KLF6     | -0.226809771 | 1.68E-06    |
| LINC01314 | ADD3     | -0.0500417   | 0.295363589 |
| LINC01314 | TSPAN7   | 0.051106046  | 0.285202031 |
| LINC01314 | KLF9     | -0.103146657 | 0.030752215 |
| LINC01314 | KCNQ1    | -0.102143443 | 0.032421989 |
| LINC01314 | MAN1A1   | -0.313070292 | 2.49E-11    |
| LINC01314 | MLF1     | -0.183005359 | 0.000118209 |
| LINC01314 | RARB     | -0.171774269 | 0.000305336 |
| LINC01314 | CDC42EP2 | -0.307404749 | 5.83E-11    |
| LINC01314 | FAM3B    | -0.275693654 | 4.93E-09    |
| LINC01314 | GADD45B  | -0.257735513 | 4.83E-08    |
| LINC01314 | TMEM47   | -0.069032132 | 0.148693791 |
| LINC01314 | SDF2L1   | -0.178820738 | 0.000169462 |
| LINC01314 | CCDC85A  | -0.299740722 | 1.79E-10    |
| LINC01314 | CRYBG3   | -0.271884902 | 8.11E-09    |
| LINC01314 | FBLN2    | -0.167096197 | 0.000445904 |
| LINC01314 | PEBP4    | 0.001118811  | 0.981344742 |
| LINC01314 | CDADC1   | -0.057423472 | 0.229762772 |
| LINC01314 | FAM63A   | -0.235514741 | 6.49E-07    |
| LINC01314 | GLUL     | -0.401167036 | 0           |
| LINC01314 | FREM2    | -0.289968427 | 7.15E-10    |
| LINC01314 | ACKR3    | -0.152925675 | 0.001324118 |
| LINC01314 | DENND6A  | -0.209787188 | 9.76E-06    |
| LINC01314 | CLDN8    | -0.495486175 | 0           |
| LINC01314 | UTS2R    | -0.200404415 | 2.34E-05    |
| LINC01314 | SCNN1B   | -0.186908858 | 8.39E-05    |
| LINC01314 | TTC30A   | -0.303935839 | 9.74E-11    |
| LINC01314 | CORO2B   | -0.079110227 | 0.097829813 |
| LINC01314 | TC2N     | -0.603728898 | 0           |
| LINC01314 | ALDH2    | -0.236207899 | 6.01E-07    |
| LINC01314 | GPR183   | -0.182077318 | 0.000128126 |
| LINC01314 | C4orf47  | -0.168442373 | 0.000400264 |
| LINC01314 | SLC25A42 | -0.015092605 | 0.752408008 |
| LINC01314 | LGMN     | -0.339433559 | 3.64E-13    |
| LINC01314 | ACSF2    | -0.352854472 | 3.42E-14    |
| LINC01314 | KIAA1467 | -0.185300142 | 9.67E-05    |

|           |          |              |             |
|-----------|----------|--------------|-------------|
| LINC01314 | PRKG1    | -0.10801011  | 0.023662327 |
| LINC01314 | GNAI1    | -0.255753056 | 6.14E-08    |
| LINC01314 | ABCC4    | -0.284957179 | 1.43E-09    |
| LINC01314 | PRPS1    | -0.221481659 | 2.96E-06    |
| LINC01314 | TSPAN5   | -0.547072623 | 0           |
| LINC01314 | CR2      | -0.04548448  | 0.341715716 |
| LINC01314 | CCDC170  | -0.382998834 | 4.95E-18    |
| LINC01314 | RRAD     | -0.281543727 | 2.27E-09    |
| LINC01314 | SCGB2A1  | -0.273428657 | 6.64E-09    |
| LINC01314 | SESN3    | -0.320137185 | 8.39E-12    |
| LINC01314 | SGK223   | -0.173207675 | 0.000271357 |
| LINC01314 | NDRG2    | -0.119263468 | 0.012435882 |
| LINC01314 | C3orf52  | -0.388118445 | 0           |
| LINC01314 | FLRT3    | 0.048981184  | 0.305726325 |
| LINC01314 | MST1R    | 0.118287061  | 0.013176829 |
| LINC01314 | SDC1     | 0.031318064  | 0.512657294 |
| LINC01314 | ST8SIA4  | 0.0212594    | 0.656765182 |
| LINC01314 | UBTD1    | 0.404136822  | 0           |
| LINC01314 | EPHA2    | 0.18605202   | 9.05E-05    |
| LINC01314 | TMEM130  | 0.551432981  | 0           |
| LINC01314 | SPINK2   | 0.293616904  | 4.29E-10    |
| LINC01314 | MMP16    | -0.000621956 | 0.989629272 |
| LINC01314 | SIGLEC15 | 0.328701027  | 2.15E-12    |
| LINC01314 | RIN1     | 0.383421651  | 5.05E-19    |
| LINC01314 | IL1RN    | -0.014033366 | 0.769274704 |
| LINC01314 | FCER1G   | 0.110612112  | 0.02048592  |
| LINC01314 | CD276    | 0.153808327  | 0.001240494 |
| LINC01314 | CTSB     | 0.327798801  | 2.49E-12    |
| LINC01314 | FAM171A2 | 0.585511763  | 0           |
| LINC01314 | ASPHD1   | 0.30699172   | 6.20E-11    |
| LINC01314 | C15orf48 | -0.122035817 | 0.01052881  |
| LINC01314 | DYSF     | 0.41339368   | 0           |
| LINC01314 | PDZRN4   | 0.606662657  | 0           |
| LINC01314 | EFHD2    | 0.318074306  | 1.16E-11    |
| LINC01314 | ASF1B    | 0.156180127  | 0.001039289 |
| LINC01314 | AQP1     | 0.457869124  | 0           |
| LINC01314 | ARRDC2   | 0.247475299  | 1.65E-07    |
| LINC01314 | PRSS1    | 0.48409868   | 3.58E-27    |
| LINC01314 | MAPK13   | 0.171330035  | 0.000316648 |
| LINC01314 | CST5     | -0.001433819 | 0.976101985 |
| LINC01314 | AHR      | 0.097409061  | 0.04138533  |
| LINC01314 | BAX      | 0.094637138  | 0.047545817 |
| LINC01314 | C1orf115 | 0.618385496  | 0           |
| LINC01314 | PLK3     | 0.21269726   | 7.30E-06    |
| LINC01314 | JAG2     | 0.412949021  | 0           |
| LINC01314 | RAD23B   | 0.428884139  | 0           |
| LINC01314 | CA12     | 0.256570038  | 5.56E-08    |
| LINC01314 | ADTRP    | 0.564741842  | 0           |
| LINC01314 | UCP2     | 0.36263315   | 5.25E-15    |
| LINC01314 | IGFBP2   | 0.256401961  | 5.68E-08    |
| LINC01314 | LOXL2    | 0.213737068  | 6.57E-06    |

|           |          |              |             |
|-----------|----------|--------------|-------------|
| LINC01314 | GPX1     | 0.177099544  | 0.000196075 |
| LINC01314 | P3H3     | 0.343179052  | 1.92E-13    |
| LINC01314 | C2orf81  | 0.537841721  | 0           |
| LINC01314 | CDT1     | 0.210338792  | 9.24E-06    |
| LINC01314 | SNX25    | 0.391171631  | 0           |
| LINC01314 | MTHFD1L  | 0.135746787  | 0.004409292 |
| LINC01314 | CDC42BPG | 0.188926002  | 6.80E-05    |
| LINC01314 | MSN      | 0.360287873  | 8.37E-15    |
| LINC01314 | SIGLEC6  | 0.325821264  | 2.58E-12    |
| LINC01314 | F2R      | 0.015477977  | 0.746300247 |
| LINC01314 | TMEM184A | 0.131224735  | 0.005926863 |
| LINC01314 | CKS2     | -0.002596471 | 0.956721681 |
| LINC01314 | TAX1BP3  | 0.121047779  | 0.011176446 |
| LINC01314 | PMEP1    | 0.300316155  | 1.65E-10    |
| LINC01314 | CXCL16   | 0.107534814  | 0.024286437 |
| LINC01314 | FAXC     | 0.074291311  | 0.120087439 |
| LINC01314 | VTCN1    | -0.039030237 | 0.41464109  |
| LINC01314 | SH2D4A   | 0.180770856  | 0.000143417 |
| LINC01314 | RNF24    | 0.329194337  | 1.99E-12    |
| LINC01314 | LY6G6C   | 0.170575026  | 0.000330553 |
| LINC01314 | NID1     | 0.102201454  | 0.032323365 |
| LINC01314 | STAC     | 0.026831046  | 0.574881842 |
| LINC01314 | RAB34    | 0.406822792  | 0           |
| LINC01314 | HES4     | 0.157854231  | 0.000915898 |
| LINC01314 | EPHA10   | 0.354894516  | 2.35E-14    |
| LINC01314 | ENTPD2   | 0.612442946  | 0           |
| LINC01314 | DDB2     | 0.196747107  | 3.43E-05    |
| LINC01314 | NKAIN4   | 0.215379967  | 5.56E-06    |
| LINC01314 | TRIM29   | 0.126512197  | 0.007993205 |
| LINC01314 | ADCY8    | 0.307945728  | 4.26E-11    |
| LINC01314 | SFTA2    | -0.039027054 | 0.414530563 |
| LINC01314 | NRIP1    | 0.310510841  | 3.67E-11    |
| LINC01314 | VWA1     | 0.358848084  | 1.11E-14    |
| LINC01314 | APLNR    | 0.318279969  | 1.12E-11    |
| LINC01314 | REN      | 0.456620005  | 5.36E-24    |
| LINC01314 | EDIL3    | 0.262739669  | 2.60E-08    |
| LINC01314 | AGRN     | 0.272273819  | 7.71E-09    |
| LINC01314 | TREM1    | 0.083327896  | 0.081167056 |
| LINC01314 | SRL      | 0.316916631  | 1.38E-11    |
| LINC01314 | RASGRF1  | 0.471514991  | 0           |
| LINC01314 | RMI2     | 0.242376538  | 2.98E-07    |
| LINC01314 | SAMD1    | 0.300838683  | 1.53E-10    |
| LINC01314 | MGAT4B   | 0.275417214  | 5.12E-09    |
| LINC01314 | NXN      | 0.096781574  | 0.042717417 |
| LINC01314 | SH3BGRL3 | 0.150623232  | 0.001567263 |
| LINC01314 | CA11     | 0.498698077  | 0           |
| LINC01314 | PLD3     | 0.522401757  | 0           |
| LINC01314 | LURAP1L  | 0.116475517  | 0.014655184 |
| LINC01314 | CARNS1   | 0.483294848  | 0           |
| LINC01314 | PDLIM7   | 0.379532335  | 7.12E-17    |
| LINC01314 | BCL2L1   | -0.034039635 | 0.476697417 |

|           |          |              |             |
|-----------|----------|--------------|-------------|
| LINC01314 | GGT6     | 0.448401779  | 0           |
| LINC01314 | DPYSL3   | 0.054131432  | 0.25761745  |
| LINC01314 | FYN      | 0.312135159  | 2.87E-11    |
| LINC01314 | TK1      | 0.069801173  | 0.144213467 |
| LINC01314 | AK1      | 0.333898649  | 9.21E-13    |
| LINC01314 | HIGD1B   | 0.552250104  | 0           |
| LINC01314 | TMEM59L  | 0.140990931  | 0.003095241 |
| LINC01314 | MEGF9    | 0.31281385   | 2.59E-11    |
| LINC01314 | ZFP36L1  | 0.122864429  | 0.010011575 |
| LINC01314 | ADRA1B   | 0.264422     | 2.10E-08    |
| LINC01314 | EPHA4    | 0.053021698  | 0.26751317  |
| LINC01314 | TCERG1L  | 0.296305143  | 2.93E-10    |
| LINC01314 | NGFR     | 0.556603795  | 0           |
| LINC01314 | EBI3     | 0.071191318  | 0.13637758  |
| LINC01314 | S100A10  | -0.126201431 | 0.008149764 |
| LINC01314 | S100B    | 0.130187338  | 0.006335291 |
| LINC01314 | CD44     | 0.499332089  | 0           |
| LINC01314 | BHLHE41  | 0.4616766    | 0           |
| LINC01314 | FBXO2    | 0.478267857  | 0           |
| LINC01314 | SLC30A2  | -0.136684188 | 0.004142583 |
| LINC01314 | FRMD5    | 0.103630605  | 0.029973412 |
| LINC01314 | SAMD11   | 0.338801107  | 4.05E-13    |
| LINC01314 | SIPAIL2  | 0.390131965  | 0           |
| LINC01314 | S100A16  | 0.074205074  | 0.120519072 |
| LINC01314 | PPL      | 0.039657236  | 0.407030857 |
| LINC01314 | ARHGD1B  | 0.198693113  | 2.85E-05    |
| LINC01314 | CDC42EP3 | 0.011543699  | 0.809336682 |
| LINC01314 | RUNX2    | 0.473994871  | 0           |
| LINC01314 | LAMC2    | 0.035301276  | 0.460507011 |
| LINC01314 | BRINP1   | 0.591934999  | 0           |
| LINC01314 | GPRC5B   | 0.389142651  | 0           |
| LINC01314 | AQP5     | 0.246950076  | 1.76E-07    |
| LINC01314 | PLAG1    | 0.523113495  | 0           |
| LINC01314 | PTPRU    | 0.072253679  | 0.130613516 |
| LINC01314 | ANGPTL4  | 0.022724152  | 0.634781817 |
| LINC01314 | PALM3    | 0.428784995  | 0           |
| LINC01314 | ACP5     | 0.125673514  | 0.008422006 |
| LINC01314 | DLG4     | 0.629186819  | 0           |
| LINC01314 | ETNK2    | 0.547420975  | 0           |
| LINC01314 | CD109    | 0.258169535  | 4.58E-08    |
| LINC01314 | SNX22    | 0.40723653   | 0           |
| LINC01314 | TMEM98   | 0.340464148  | 3.06E-13    |
| LINC01314 | CTHRC1   | 0.088625371  | 0.063575234 |
| LINC01314 | S100A2   | -0.073183137 | 0.125726763 |
| LINC01314 | C11orf80 | 0.207479639  | 1.23E-05    |
| LINC01314 | SREBF1   | 0.12637348   | 0.008062753 |
| LINC01314 | PRSS22   | 0.152612924  | 0.001354972 |
| LINC01314 | CMTM3    | 0.046862704  | 0.327138475 |
| LINC01314 | RDH5     | 0.519233966  | 0           |
| LINC01314 | MYH10    | 0.237928809  | 4.95E-07    |
| LINC01314 | EVPL     | 0.140178346  | 0.003272192 |

|           |          |              |             |
|-----------|----------|--------------|-------------|
| LINC01314 | SCD      | 0.210212557  | 9.36E-06    |
| LINC01314 | CD151    | 0.368049768  | 1.68E-15    |
| LINC01314 | S100A4   | 0.202398324  | 2.01E-05    |
| LINC01314 | BNIP1    | 0.484766125  | 0           |
| LINC01314 | MAP3K6   | 0.296170965  | 2.99E-10    |
| LINC01314 | MANEAL   | 0.378059923  | 1.23E-16    |
| LINC01314 | CD207    | 0.2888606    | 6.96E-10    |
| LINC01314 | CD1A     | 0.252194699  | 8.52E-08    |
| LINC01314 | C3       | 0.147770604  | 0.001925191 |
| LINC01314 | NT5E     | 0.036141378  | 0.449898573 |
| LINC01314 | CACNG4   | 0.098620846  | 0.038877383 |
| LINC01314 | FHOD1    | 0.24078243   | 3.58E-07    |
| LINC01314 | LEMD1    | 0.363874792  | 4.08E-15    |
| LINC01314 | ATP11A   | 0.307723032  | 5.56E-11    |
| LINC01314 | PPAP2C   | 0.178297784  | 0.000177166 |
| LINC01314 | DRAM1    | 0.084648116  | 0.076451014 |
| LINC01314 | CDA      | 0.34678285   | 1.02E-13    |
| LINC01314 | CCND2    | 0.478208711  | 0           |
| LINC01314 | LCN6     | 0.534568068  | 8.23E-34    |
| LINC01314 | CDH4     | 0.279155473  | 3.12E-09    |
| LINC01314 | MMP11    | 0.168423792  | 0.000400863 |
| LINC01314 | B3GAT1   | 0.326095763  | 3.27E-12    |
| LINC01314 | SPP1     | 0.109314444  | 0.022020419 |
| LINC01314 | HLA-DQB1 | 0.046971352  | 0.326017263 |
| LINC01314 | SDC3     | 0.369819895  | 1.13E-15    |
| LINC01314 | CX3CL1   | 0.054112851  | 0.257781024 |
| LINC01314 | SDK1     | 0.355530655  | 2.08E-14    |
| LINC01314 | DOCK9    | 0.325307148  | 3.71E-12    |
| LINC01314 | CSF2     | 0.191669407  | 5.30E-05    |
| LINC01314 | GRHL3    | 0.131252961  | 0.005916089 |
| LINC01314 | TMEM92   | 0.208294563  | 1.08E-05    |
| LINC01314 | BASP1    | 0.147009648  | 0.002032575 |
| LINC01314 | HRH1     | 0.145248172  | 0.002302495 |
| LINC01314 | ESM1     | 0.156366501  | 0.00102483  |
| LINC01314 | B4GALNT3 | 0.17022867   | 0.000346403 |
| LINC01314 | LMO3     | 0.233807731  | 7.84E-07    |
| LINC01314 | C9orf16  | 0.199570233  | 2.63E-05    |
| LINC01314 | SEMA3F   | 0.543798881  | 0           |
| LINC01314 | PLA2G12B | 0.611113726  | 2.67E-46    |
| LINC01314 | KLK6     | 0.349158177  | 4.95E-14    |
| LINC01314 | ST3GAL5  | 0.528076802  | 0           |
| LINC01314 | FAM132B  | 0.380592142  | 4.40E-17    |
| LINC01314 | CDKN1A   | -0.062362099 | 0.192095562 |
| LINC01314 | E2F1     | 0.216080927  | 5.18E-06    |
| LINC01314 | B3GNT8   | 0.293884976  | 4.13E-10    |
| LINC01314 | MTMR11   | 0.309237569  | 4.44E-11    |
| LINC01314 | MYO1G    | -0.039882899 | 0.404365029 |
| LINC01314 | TMSB10   | 0.120910339  | 0.011269276 |
| LINC01314 | UNC5CL   | 0.154677079  | 0.001162963 |
| LINC01314 | ABR      | 0.192068609  | 5.27E-05    |
| LINC01314 | PLP2     | 0.16241699   | 0.000644983 |



|           |          |              |             |
|-----------|----------|--------------|-------------|
| LINC01314 | SRCIN1   | 0.43555247   | 0           |
| LINC01314 | PDE9A    | 0.123627371  | 0.009555423 |
| LINC01314 | TREM2    | 0.177515836  | 0.000189301 |
| LINC01314 | KDEL3    | 0.103633442  | 0.029968897 |
| LINC01314 | PC       | 0.428235518  | 0           |
| LINC01314 | C2CD4A   | 0.068779804  | 0.150186686 |
| LINC01314 | PELI1    | 0.064431644  | 0.177735524 |
| LINC01314 | SSX1     | 0.169360768  | 0.000371666 |
| LINC01314 | MROH6    | 0.255864824  | 6.06E-08    |
| LINC01314 | ESPN     | 0.539320231  | 0           |
| LINC01314 | BMP1     | 0.439792265  | 0           |
| LINC01314 | TM4SF4   | 0.286302708  | 9.97E-10    |
| LINC01314 | CORO2A   | 0.407793667  | 0           |
| LINC01314 | CD164L2  | 0.408563431  | 4.31E-19    |
| LINC01314 | CTSS     | 0.06147278   | 0.198521113 |
| LINC01314 | CLU      | 0.367047121  | 2.09E-15    |
| LINC01314 | TMSB4X   | 0.103652164  | 0.029939115 |
| LINC01314 | WNT10A   | 0.344214476  | 1.18E-13    |
| LINC01314 | NAPSA    | 0.039508307  | 0.408795916 |
| LINC01314 | PLEKHA4  | 0.555814046  | 0           |
| LINC01314 | SFTPA1   | 0.149786014  | 0.001648475 |
| LINC01314 | Clorf116 | 0.160272696  | 0.000761403 |
| LINC01314 | TM4SF1   | 0.013488428  | 0.777995151 |
| LINC01314 | SEL1L3   | 0.115848456  | 0.015199873 |
| LINC01314 | VASN     | 0.323890621  | 4.65E-12    |
| LINC01314 | NPTXR    | 0.289095845  | 8.08E-10    |
| LINC01314 | PDE4C    | 0.118409325  | 0.013081966 |
| LINC01314 | CDC42EP1 | 0.184790379  | 0.000101131 |
| LINC01314 | ENDOD1   | 0.331584718  | 1.35E-12    |
| LINC01314 | RYR1     | 0.29787301   | 2.34E-10    |
| LINC01314 | IL1RAP   | 0.318705765  | 1.05E-11    |
| LINC01314 | SLC35F2  | 0.353531048  | 2.27E-14    |
| LINC01314 | ISYNA1   | 0.501687295  | 0           |
| LINC01314 | HLA-G    | -0.005177055 | 0.913832468 |
| LINC01314 | CDKN2B   | 0.071957523  | 0.132201088 |
| LINC01314 | ALDH1A3  | 0.026555882  | 0.578810707 |
| LINC01314 | CLIP3    | 0.466191418  | 0           |
| LINC01314 | ULBP2    | 0.315800231  | 1.64E-11    |
| LINC01314 | ETHE1    | 0.122160492  | 0.010449501 |
| LINC01314 | XPR1     | 0.169158083  | 0.000377809 |
| LINC01314 | SPTBN2   | 0.287566983  | 9.97E-10    |
| LINC01314 | IVL      | 0.177728118  | 0.000181806 |
| LINC01314 | MARCO    | 0.071321809  | 0.135659204 |
| LINC01314 | PLXND1   | 0.491421407  | 0           |
| LINC01314 | EMILIN2  | 0.147307364  | 0.001989926 |
| LINC01314 | PLAUR    | 0.015537549  | 0.745357501 |
| LINC01314 | CDC42EP5 | 0.217688083  | 4.39E-06    |
| LINC01314 | TRPC5    | 0.720710504  | 1.54E-71    |
| LINC01314 | TMEM100  | 0.220730064  | 3.20E-06    |
| LINC01314 | QSOX1    | 0.27388594   | 6.25E-09    |
| LINC01314 | ARHGAP23 | 0.414222435  | 0           |

|           |           |              |             |
|-----------|-----------|--------------|-------------|
| LINC01314 | MDFI      | 0.146153661  | 0.002159902 |
| LINC01314 | FSTL3     | 0.143979297  | 0.002516803 |
| LINC01314 | INF2      | 0.514188536  | 0           |
| LINC01314 | TGFBR1    | 0.438641824  | 0           |
| LINC01314 | TGFBI     | 0.255803975  | 6.11E-08    |
| LINC01314 | ERBB3     | 0.12314399   | 0.009842232 |
| LINC01314 | CCL18     | 0.100815847  | 0.03475028  |
| LINC01314 | CCL17     | 0.034664783  | 0.468786547 |
| LINC01314 | C16orf45  | 0.489871552  | 0           |
| LINC01314 | PRDM1     | 0.407870401  | 0           |
| LINC01314 | TRIM47    | 0.144671179  | 0.002397791 |
| LINC01314 | CNFN      | 0.158601571  | 0.000865311 |
| LINC01314 | ARMCX3    | 0.640975896  | 0           |
| LINC01314 | RAMP1     | 0.471465915  | 0           |
| LINC01314 | GABRD     | 0.450677981  | 0           |
| LINC01314 | COL13A1   | 0.444206237  | 0           |
| LINC01314 | S100A5    | 0.290556767  | 6.59E-10    |
| LINC01314 | MISP      | -0.057265607 | 0.231047687 |
| LINC01314 | HES6      | 0.395690137  | 0           |
| LINC01314 | PSD3      | 0.406611312  | 0           |
| LINC01314 | DOK7      | 0.310899049  | 3.46E-11    |
| LINC01314 | ZMAT3     | 0.192567167  | 5.04E-05    |
| LINC01314 | MFAP2     | 0.334535639  | 8.28E-13    |
| LINC01314 | TMEM79    | 0.428765421  | 0           |
| LINC01314 | SLC1A5    | 0.207354255  | 1.24E-05    |
| LINC01314 | BBC3      | 0.151570988  | 0.001462597 |
| LINC01314 | HLA-DQB2  | 0.137677474  | 0.003875981 |
| LINC01314 | C1QL1     | 0.600742943  | 0           |
| LINC01314 | TMEM215   | 0.577341736  | 2.21E-40    |
| LINC01314 | PNP       | 0.157379644  | 0.000949426 |
| LINC01314 | ARNTL     | 0.314375477  | 2.04E-11    |
| LINC01314 | CLDN2     | 0.57852212   | 1.41E-40    |
| LINC01314 | MVP       | 0.170935444  | 0.000327023 |
| LINC01314 | LGALS1    | 0.116497219  | 0.014636645 |
| LINC01314 | BIRC7     | 0.350486608  | 3.91E-14    |
| LINC01314 | COL8A1    | 0.310556228  | 3.64E-11    |
| LINC01314 | PERP      | 0.03078887   | 0.519809706 |
| LINC01314 | GJA4      | 0.454902033  | 0           |
| LINC01314 | IGFL2     | 0.280133745  | 2.33E-09    |
| LINC01314 | DAPK2     | 0.289037834  | 8.14E-10    |
| LINC01314 | MAMLD1    | 0.284963704  | 1.43E-09    |
| LINC01314 | ETV5      | 0.594198294  | 0           |
| LINC01314 | RUNX1     | 0.085295461  | 0.074221384 |
| LINC01314 | LONRF2    | 0.582224403  | 0           |
| LINC01314 | SPOCK1    | 0.426058318  | 0           |
| LINC01314 | XKRX      | 0.26716981   | 1.49E-08    |
| LINC01314 | TGFBI     | 0.325421895  | 3.65E-12    |
| LINC01314 | ERP27     | 0.111686103  | 0.019287123 |
| LINC01314 | TNFRSF10C | 0.209934131  | 9.62E-06    |
| LINC01314 | PALM      | 0.338974716  | 3.94E-13    |
| LINC01314 | TSC22D1   | 0.596615624  | 0           |

|           |          |              |             |
|-----------|----------|--------------|-------------|
| LINC01314 | TGM2     | -0.003837545 | 0.936071771 |
| LINC01314 | UBE2QL1  | 0.625372677  | 0           |
| LINC01314 | ECE1     | 0.330603772  | 1.58E-12    |
| LINC01314 | COL8A2   | 0.160929827  | 0.000723806 |
| LINC01314 | HIST3H2A | 0.11401436   | 0.01689638  |
| LINC01314 | TNFRSF21 | 0.103230057  | 0.030616779 |
| LINC01314 | SOX4     | 0.121002959  | 0.011206644 |
| LINC01314 | ELF3     | 0.031934346  | 0.504392776 |
| LINC01314 | TPD52L1  | 0.482795723  | 0           |
| LINC01314 | INHBB    | 0.458882125  | 0           |
| LINC01314 | HPN      | 0.41072771   | 0           |
| LINC01314 | MMP7     | 0.078397226  | 0.100912332 |
| LINC01314 | RAB27A   | 0.439802761  | 0           |
| LINC01314 | IGF2BP2  | 0.402433074  | 0           |
| LINC01314 | ITGB4    | 0.125697768  | 0.008409323 |
| LINC01314 | PPP1R1B  | 0.394430765  | 0           |
| LINC01314 | NPDC1    | 0.47630015   | 0           |
| LINC01314 | CCL13    | 0.126287642  | 0.00807089  |
| LINC01314 | SPINT1   | 0.16332574   | 0.000600817 |
| LINC01314 | HEY2     | 0.627704338  | 0           |
| LINC01314 | CST2     | -0.067896898 | 0.155554913 |
| LINC01314 | ADM      | 0.404674384  | 0           |
| LINC01314 | VSTM2L   | -0.034756338 | 0.467462196 |
| LINC01314 | FAM84A   | 0.144454168  | 0.002434554 |
| LINC01314 | P4HA2    | 0.366027738  | 2.60E-15    |
| LINC01314 | LPL      | 0.330473849  | 1.61E-12    |
| LINC01314 | TMEM173  | 0.229065549  | 1.32E-06    |
| LINC01314 | DHRS3    | 0.368417977  | 1.55E-15    |
| LINC01314 | SCN1B    | 0.29409376   | 4.01E-10    |
| LINC01314 | GLT1D1   | 0.570319162  | 0           |
| LINC01314 | PHYHIP   | 0.502787809  | 0           |
| LINC01314 | BHLHE40  | 0.199375491  | 2.68E-05    |
| LINC01314 | BID      | 0.344049223  | 1.65E-13    |
| LINC01314 | POSTN    | -0.040820726 | 0.393398293 |
| LINC01314 | ITGA3    | 0.121492864  | 0.010880458 |
| LINC01314 | RSP04    | 0.340931359  | 2.82E-13    |
| LINC01314 | ADAMTS9  | 0.668604777  | 0           |
| LINC01314 | ABTB2    | 0.232387942  | 9.17E-07    |
| LINC01314 | KCNQ3    | 0.183219816  | 0.000116022 |
| LINC01314 | ANXA1    | 0.300207082  | 1.68E-10    |
| LINC01314 | S100A11  | 0.135866072  | 0.004374512 |
| LINC01314 | CEACAM6  | -0.08040611  | 0.092449243 |
| LINC01314 | IER5L    | 0.346995322  | 9.84E-14    |
| LINC01314 | KRT80    | 0.066175106  | 0.166269852 |
| LINC01314 | CDH6     | 0.025401328  | 0.595431324 |
| LINC01314 | UNC5B    | 0.404824306  | 0           |
| LINC01314 | PLEKHN1  | 0.29381888   | 4.17E-10    |
| LINC01314 | SYTL1    | 0.232697005  | 8.87E-07    |
| LINC01314 | TMEM163  | 0.126133917  | 0.008184137 |
| LINC01314 | C4orf48  | 0.291432186  | 5.83E-10    |
| LINC01314 | B3GNT7   | 0.419145601  | 0           |

|           |            |              |             |
|-----------|------------|--------------|-------------|
| LINC01314 | BAIAP3     | 0.467392495  | 0           |
| LINC01314 | PHLDA2     | 0.194018019  | 4.41E-05    |
| LINC01314 | GAP43      | 0.277398881  | 3.38E-09    |
| LINC01314 | S100A1     | 0.261304278  | 3.11E-08    |
| LINC01314 | PTPRE      | 0.241388642  | 3.34E-07    |
| LINC01314 | CCND1      | 0.231174525  | 1.05E-06    |
| LINC01314 | ST6GALNAC5 | 0.018558551  | 0.698186561 |
| LINC01314 | KRT17      | 0.163706289  | 0.00058317  |
| LINC01314 | HPCAL4     | 0.596133803  | 0           |
| LINC01314 | GABBR2     | 0.33194002   | 1.27E-12    |
| LINC01314 | DIRAS3     | 0.583747876  | 0           |
| LINC01314 | SERINC2    | 0.227536402  | 1.56E-06    |
| LINC01314 | PTCHD4     | 0.238254325  | 4.77E-07    |
| LINC01314 | EPS8       | 0.537618328  | 0           |
| LINC01314 | LY6E       | 0.309881509  | 4.03E-11    |
| LINC01314 | UPP1       | 0.05837066   | 0.2221597   |
| LINC01314 | AHNAK2     | 0.074937521  | 0.11689134  |
| LINC01314 | PLXNC1     | 0.556790736  | 0           |
| LINC01314 | TNC        | 0.112114168  | 0.018826634 |
| LINC01314 | DUSP4      | 0.399478039  | 0           |
| LINC01314 | NRCAM      | 0.408227263  | 0           |
| LINC01314 | NRP2       | 0.489284063  | 0           |
| LINC01314 | CTSC       | 0.078315798  | 0.10125418  |
| LINC01314 | AMIGO2     | 0.451018532  | 0           |
| LINC01314 | NAB2       | 0.485793309  | 0           |
| LINC01314 | TBC1D2     | 0.164291793  | 0.000556956 |
| LINC01314 | PHLDA3     | 0.180925884  | 0.000141517 |
| LINC01314 | PTP4A3     | 0.288374036  | 8.92E-10    |
| LINC01314 | CRABP2     | 0.276762114  | 4.29E-09    |
| LINC01314 | GOS2       | 0.435309361  | 0           |
| LINC01314 | S100A6     | 0.075402747  | 0.11463191  |
| LINC01314 | FOXQ1      | 0.025497919  | 0.594032534 |
| LINC01314 | LRG1       | 0.292731131  | 4.86E-10    |
| LINC01314 | LAMP5      | 0.291322546  | 5.92E-10    |
| LINC01314 | ALDH3B1    | 0.120518443  | 0.011537731 |
| LINC01314 | CDH2       | 0.560052139  | 0           |
| LINC01314 | SCG5       | 0.630885319  | 0           |
| LINC01314 | ZCCHC16    | 0.726031216  | 4.49E-73    |
| LINC01314 | GRB7       | 0.263323613  | 2.42E-08    |
| LINC01314 | TIAM1      | 0.293396914  | 4.43E-10    |
| LINC01314 | FXYD5      | 0.306297569  | 6.87E-11    |
| LINC01314 | CLDN9      | 0.361109961  | 7.12E-15    |
| LINC01314 | FAM43A     | 0.467867791  | 0           |
| LINC01314 | CHST2      | 0.30455666   | 8.89E-11    |
| LINC01314 | HMGA2      | 0.442821197  | 0           |
| LINC01314 | GALNT7     | 0.446478042  | 0           |
| LINC01314 | CBLN1      | -0.056795559 | 0.234903699 |
| LINC01314 | STRA6      | 0.273877005  | 6.26E-09    |
| LINC01314 | MUC21      | 0.164080222  | 0.00055752  |
| LINC01314 | PRR36      | 0.435081145  | 0           |
| LINC01314 | NFE2L3     | 0.02798404   | 0.558557393 |

|           |          |              |             |
|-----------|----------|--------------|-------------|
| LINC01314 | NR1D1    | 0.125358635  | 0.008588222 |
| LINC01314 | MUC1     | -0.059352173 | 0.214472496 |
| LINC01314 | NAT8L    | 0.667316328  | 0           |
| LINC01314 | APOC1    | 0.412898669  | 0           |
| LINC01314 | EVA1A    | 0.105814897  | 0.02666523  |
| LINC01314 | ENTPD1   | 0.523248666  | 0           |
| LINC01314 | COL1A1   | 0.092229311  | 0.053504457 |
| LINC01314 | FNDC4    | 0.103289487  | 0.030520581 |
| LINC01314 | FRMD3    | 0.569383321  | 0           |
| LINC01314 | SHROOM4  | 0.426036049  | 0           |
| LINC01314 | NELL2    | 0.471325638  | 0           |
| LINC01314 | EPHB3    | 0.193479605  | 4.63E-05    |
| LINC01314 | TMC6     | 0.298440643  | 2.16E-10    |
| LINC01314 | NOD1     | 0.464348528  | 0           |
| LINC01314 | GGCT     | 0.416673522  | 0           |
| LINC01314 | ICAM1    | 0.143599599  | 0.002584382 |
| LINC01314 | PRSS23   | 0.141403819  | 0.003008705 |
| LINC01314 | CFI      | 0.235290497  | 6.65E-07    |
| LINC01314 | CD55     | 0.018192172  | 0.703751881 |
| LINC01314 | RASD2    | 0.415136433  | 0           |
| LINC01314 | KLK11    | 0.398390711  | 3.77E-18    |
| LINC01314 | ICAM5    | 0.414632628  | 0           |
| LINC01314 | ADORA1   | 0.291029227  | 6.17E-10    |
| LINC01314 | ITGA2    | 0.078370263  | 0.101016408 |
| LINC01314 | ABCC3    | 0.392075559  | 0           |
| LINC01314 | MFGE8    | 0.348596096  | 7.40E-14    |
| LINC01314 | STK32A   | 0.332586655  | 1.14E-12    |
| LINC01314 | CYSLTR2  | 0.371202382  | 8.20E-16    |
| LINC01314 | LAD1     | 0.383241376  | 2.33E-18    |
| LINC01314 | MGAT3    | 0.096490098  | 0.04334838  |
| LINC01314 | IGFBP6   | 0.350336012  | 5.42E-14    |
| LINC01314 | CYP2S1   | 0.080032878  | 0.093969288 |
| LINC01314 | KCNJ2    | 0.388449493  | 0           |
| LINC01314 | FAM20A   | 0.196193517  | 3.61E-05    |
| LINC01314 | TGFA     | 0.495507593  | 0           |
| LINC01314 | MXRA8    | 0.240552087  | 3.68E-07    |
| LINC01314 | C8orf4   | 0.105220316  | 0.027533014 |
| LINC01314 | CLDN10   | 0.243409123  | 2.43E-07    |
| LINC01314 | PDE5A    | 0.496358332  | 0           |
| LINC01314 | APOE     | 0.534313239  | 0           |
| LINC01314 | SPOCK2   | 0.17952737   | 0.000159551 |
| LINC01314 | TENM1    | 0.551169589  | 0           |
| LINC01314 | SLIT1    | 0.456405223  | 0           |
| LINC01314 | CXCL14   | 0.209852007  | 9.70E-06    |
| LINC01314 | ECM1     | 0.316365736  | 1.51E-11    |
| LINC01314 | DUSP5    | 0.134034813  | 0.004936746 |
| LINC01314 | SEZ6L2   | 0.298106616  | 2.27E-10    |
| LINC01314 | THRSP    | 0.485580554  | 0           |
| LINC01314 | C19orf33 | 0.038527362  | 0.420534849 |
| LINC01314 | MPZL2    | 0.324080115  | 4.51E-12    |
| LINC01314 | CTSH     | 0.484339762  | 0           |

|           |           |              |             |
|-----------|-----------|--------------|-------------|
| LINC01314 | CYP1B1    | 0.427326342  | 0           |
| LINC01314 | ALOX5     | -0.019986696 | 0.67611074  |
| LINC01314 | SYTL5     | 0.255099125  | 5.97E-08    |
| LINC01314 | TNFRSF12A | 0.333439948  | 9.93E-13    |
| LINC01314 | DUSP6     | 0.268094021  | 1.32E-08    |
| LINC01314 | ALOX15B   | 0.073201151  | 0.125633479 |
| LINC01314 | SDC4      | 0.405889787  | 0           |
| LINC01314 | MDK       | 0.363599486  | 4.31E-15    |
| LINC01314 | KRT19     | 0.031917042  | 0.504623869 |
| LINC01314 | MET       | 0.206005526  | 1.42E-05    |
| LINC01314 | TESC      | 0.616927836  | 0           |
| LINC01314 | CXCL17    | 0.182753604  | 0.000117794 |
| LINC01314 | NPC2      | 0.53956873   | 0           |
| LINC01314 | COMP      | 0.23384858   | 7.81E-07    |
| LINC01314 | TUSC3     | 0.433346477  | 0           |
| LINC01314 | TMPRSS4   | 0.052497326  | 0.272278622 |
| LINC01314 | LGALS3    | 0.178324166  | 0.00017677  |
| LINC01314 | CRLF1     | 0.120159028  | 0.011788896 |
| LINC01314 | CTXN1     | 0.278256935  | 3.52E-09    |
| LINC01314 | PCSK1N    | 0.23479506   | 7.03E-07    |
| LINC01314 | NMU       | 0.063223059  | 0.186096075 |
| LINC01314 | GALE      | 0.415862072  | 0           |
| LINC01314 | PCSK2     | 0.111739292  | 0.019229376 |
| LINC01314 | GJB3      | 0.516028589  | 0           |
| LINC01314 | SLPI      | -0.025306865 | 0.596800752 |
| LINC01314 | AGR2      | 0.22694948   | 1.66E-06    |
| LINC01314 | MRC2      | 0.301419506  | 1.41E-10    |
| LINC01314 | GOLT1A    | 0.48900436   | 0           |
| LINC01314 | SLC27A6   | 0.139869926  | 0.003317317 |
| LINC01314 | KCNN4     | 0.128564296  | 0.007025115 |
| LINC01314 | ETV4      | 0.385838569  | 4.94E-17    |
| LINC01314 | SYT12     | 0.462029065  | 0           |
| LINC01314 | PVRL4     | 0.257409997  | 5.02E-08    |
| LINC01314 | PLCD3     | 0.457322058  | 0           |
| LINC01314 | PLAU      | 0.150756985  | 0.001552087 |
| LINC01314 | LRRK2     | 0.606393025  | 0           |
| LINC01314 | SFN       | 0.064698298  | 0.175944849 |
| LINC01314 | LPAR5     | 0.377095005  | 1.69E-16    |
| LINC01314 | NGEF      | 0.189785599  | 6.49E-05    |
| LINC01314 | DTX4      | 0.228671951  | 1.38E-06    |
| LINC01314 | CST6      | 0.305593773  | 7.63E-11    |
| LINC01314 | QPCT      | 0.531001909  | 0           |
| LINC01314 | TIMP1     | 0.447192759  | 0           |
| LINC01314 | CAMK2N1   | 0.472592386  | 0           |
| LINC01314 | KLHDC8A   | 0.382871181  | 6.41E-18    |
| LINC01314 | PDLIM4    | 0.31265017   | 2.65E-11    |
| LINC01314 | SCEL      | 0.220464403  | 3.29E-06    |
| LINC01314 | LCN2      | 0.049353081  | 0.302065324 |
| LINC01314 | PROS1     | 0.28361923   | 1.71E-09    |
| LINC01314 | GABRB2    | 0.318835404  | 1.03E-11    |
| LINC01314 | TMPRSS6   | 0.185990463  | 9.10E-05    |

|               |          |              |             |
|---------------|----------|--------------|-------------|
| LINC01314     | KLK7     | 0.327506274  | 1.96E-12    |
| LINC01314     | PDZK1IP1 | 0.190830797  | 5.90E-05    |
| LINC01314     | CDH3     | 0.424818803  | 0           |
| LINC01314     | LRP4     | 0.607679488  | 0           |
| LINC01314     | IGSF1    | 0.166570123  | 0.000465022 |
| LINC01314     | B3GNT3   | 0.012874556  | 0.787852163 |
| LINC01314     | CLDN1    | 0.251963168  | 9.70E-08    |
| LINC01314     | GDF15    | 0.190709101  | 5.97E-05    |
| LINC01314     | ARHGAP36 | 0.144154087  | 0.002465203 |
| LINC01314     | LAMB3    | 0.206307497  | 1.38E-05    |
| LINC01314     | KLK10    | 0.312975261  | 2.53E-11    |
| LINC01314     | DPP4     | 0.109343379  | 0.021985145 |
| LINC01314     | METTL7B  | 0.559358556  | 0           |
| LINC01314     | LIPH     | 0.180583206  | 0.00014575  |
| LINC01314     | CLDN16   | 0.31091919   | 3.45E-11    |
| LINC01314     | CHI3L1   | 0.248122644  | 1.53E-07    |
| LINC01314     | SLC22A31 | 0.333638922  | 7.11E-13    |
| LINC01314     | TACSTD2  | 0.277623207  | 3.82E-09    |
| LINC01314     | SFTPB    | -0.004911253 | 0.918240686 |
| LINC01314     | RXRG     | 0.602223581  | 0           |
| LINC01314     | DCSTAMP  | 0.34143027   | 1.90E-13    |
| LINC01314     | CITED1   | 0.537005024  | 0           |
| LINC01314     | SERPINA1 | 0.311268676  | 3.27E-11    |
| LINC01314     | PRR15    | 0.589665321  | 0           |
| LINC01314     | SLC34A2  | 0.157713812  | 0.000925702 |
| LINC01314     | FN1      | 0.133212724  | 0.005209717 |
| LINC01314     | ZCCHC12  | 0.394814009  | 0           |
| RP11-221N13.3 | TFF3     | -0.630224061 | 5.64E-50    |
| RP11-221N13.3 | CCL21    | -0.428859805 | 4.55E-21    |
| RP11-221N13.3 | TPO      | -0.656497941 | 1.81E-55    |
| RP11-221N13.3 | MT1G     | -0.559243778 | 1.74E-37    |
| RP11-221N13.3 | DIO1     | -0.646139248 | 3.07E-53    |
| RP11-221N13.3 | DPT      | -0.380193275 | 1.52E-16    |
| RP11-221N13.3 | CDH16    | -0.603845788 | 5.76E-45    |
| RP11-221N13.3 | CRABP1   | -0.465162004 | 5.93E-25    |
| RP11-221N13.3 | SLC26A7  | -0.512325274 | 9.51E-31    |
| RP11-221N13.3 | MT1H     | -0.521497285 | 5.53E-32    |
| RP11-221N13.3 | SLC26A4  | -0.503164542 | 1.50E-29    |
| RP11-221N13.3 | SLC5A8   | -0.574211922 | 7.20E-40    |
| RP11-221N13.3 | PKHD1L1  | -0.629956708 | 6.37E-50    |
| RP11-221N13.3 | TFCP2L1  | -0.603698986 | 6.12E-45    |
| RP11-221N13.3 | WSCD2    | -0.619552141 | 6.84E-48    |
| RP11-221N13.3 | IPCEF1   | -0.551362139 | 2.80E-36    |
| RP11-221N13.3 | SLC5A5   | -0.513967247 | 5.75E-31    |
| RP11-221N13.3 | MT1F     | -0.611093129 | 2.70E-46    |
| RP11-221N13.3 | FOSB     | -0.42200811  | 2.19E-20    |
| RP11-221N13.3 | SEMA3D   | -0.633274233 | 1.38E-50    |
| RP11-221N13.3 | BMP8A    | -0.523488045 | 2.95E-32    |
| RP11-221N13.3 | MATN2    | -0.598410708 | 5.43E-44    |
| RP11-221N13.3 | PLA2R1   | -0.592597205 | 5.72E-43    |
| RP11-221N13.3 | COL23A1  | -0.501535819 | 2.42E-29    |

|               |            |              |          |
|---------------|------------|--------------|----------|
| RP11-221N13.3 | HGD        | -0.561800829 | 6.95E-38 |
| RP11-221N13.3 | TCEAL2     | -0.445724231 | 8.15E-23 |
| RP11-221N13.3 | CHRDL1     | -0.363495661 | 3.69E-15 |
| RP11-221N13.3 | TNFRSF11B  | -0.556872393 | 4.05E-37 |
| RP11-221N13.3 | FAM167A    | -0.594509319 | 2.65E-43 |
| RP11-221N13.3 | KIT        | -0.640545451 | 4.54E-52 |
| RP11-221N13.3 | SLC4A4     | -0.616378571 | 2.75E-47 |
| RP11-221N13.3 | SMOC2      | -0.460213948 | 2.14E-24 |
| RP11-221N13.3 | FHL1       | -0.637811103 | 1.66E-51 |
| RP11-221N13.3 | OTOS       | -0.503034618 | 1.56E-29 |
| RP11-221N13.3 | IGFBPL1    | -0.567818801 | 7.77E-39 |
| RP11-221N13.3 | HBB        | -0.382492543 | 9.62E-17 |
| RP11-221N13.3 | BEX1       | -0.408760182 | 4.13E-19 |
| RP11-221N13.3 | FABP4      | -0.529689408 | 4.04E-33 |
| RP11-221N13.3 | LMOD1      | -0.569210857 | 4.65E-39 |
| RP11-221N13.3 | SOD3       | -0.56924036  | 4.60E-39 |
| RP11-221N13.3 | TMEM171    | -0.603309074 | 7.20E-45 |
| RP11-221N13.3 | PI16       | -0.367994315 | 1.59E-15 |
| RP11-221N13.3 | ZMAT4      | -0.625676162 | 4.46E-49 |
| RP11-221N13.3 | MFAP4      | -0.305005737 | 6.64E-11 |
| RP11-221N13.3 | CWH43      | -0.606558315 | 1.85E-45 |
| RP11-221N13.3 | SPX        | -0.540031715 | 1.34E-34 |
| RP11-221N13.3 | APOD       | -0.290239011 | 5.73E-10 |
| RP11-221N13.3 | DPP6       | -0.579801739 | 8.62E-41 |
| RP11-221N13.3 | MMRN1      | -0.43309202  | 1.69E-21 |
| RP11-221N13.3 | WDR72      | -0.519368085 | 1.08E-31 |
| RP11-221N13.3 | MPPED2     | -0.626625921 | 2.90E-49 |
| RP11-221N13.3 | PAPSS2     | -0.520733415 | 7.03E-32 |
| RP11-221N13.3 | DCN        | -0.23902722  | 4.03E-07 |
| RP11-221N13.3 | SORBS2     | -0.636276703 | 3.41E-51 |
| RP11-221N13.3 | EGR2       | -0.314430997 | 1.57E-11 |
| RP11-221N13.3 | EDN3       | -0.238463007 | 4.30E-07 |
| RP11-221N13.3 | DIO2       | -0.495849261 | 1.28E-28 |
| RP11-221N13.3 | ITPR1      | -0.606519855 | 1.88E-45 |
| RP11-221N13.3 | CFD        | -0.301741626 | 1.08E-10 |
| RP11-221N13.3 | CPXM1      | -0.501330722 | 2.57E-29 |
| RP11-221N13.3 | ELMO1      | -0.626057861 | 3.75E-49 |
| RP11-221N13.3 | GPC3       | -0.523543451 | 2.90E-32 |
| RP11-221N13.3 | MYOC       | -0.24799078  | 1.41E-07 |
| RP11-221N13.3 | DEPTOR     | -0.679592387 | 8.94E-61 |
| RP11-221N13.3 | DGKI       | -0.668818818 | 3.06E-58 |
| RP11-221N13.3 | CARTPT     | -0.441915178 | 2.06E-22 |
| RP11-221N13.3 | IYD        | -0.44236835  | 1.85E-22 |
| RP11-221N13.3 | LYVE1      | -0.387280701 | 3.69E-17 |
| RP11-221N13.3 | CLCNKB     | -0.578952131 | 1.19E-40 |
| RP11-221N13.3 | NCAM1      | -0.544579884 | 2.89E-35 |
| RP11-221N13.3 | HBA2       | -0.37128183  | 8.52E-16 |
| RP11-221N13.3 | GLT8D2     | -0.499920004 | 3.90E-29 |
| RP11-221N13.3 | OGDHL      | -0.521240201 | 5.99E-32 |
| RP11-221N13.3 | LIFR       | -0.528437189 | 6.06E-33 |
| RP11-221N13.3 | CSGALNACT1 | -0.541931915 | 7.09E-35 |



|               |          |              |             |
|---------------|----------|--------------|-------------|
| RP11-221N13.3 | RAP1GAP  | -0.546752838 | 1.38E-35    |
| RP11-221N13.3 | COL9A3   | -0.504231161 | 1.09E-29    |
| RP11-221N13.3 | FBLN1    | -0.341920284 | 1.75E-13    |
| RP11-221N13.3 | EFEMP1   | -0.52596439  | 1.34E-32    |
| RP11-221N13.3 | AOX1     | -0.567572723 | 8.50E-39    |
| RP11-221N13.3 | GRIN2C   | -0.54962718  | 5.12E-36    |
| RP11-221N13.3 | C11orf74 | -0.544050545 | 3.46E-35    |
| RP11-221N13.3 | PPARGC1A | -0.583551503 | 2.03E-41    |
| RP11-221N13.3 | ANGPTL1  | -0.467967224 | 2.84E-25    |
| RP11-221N13.3 | SCARA5   | -0.355477003 | 1.60E-14    |
| RP11-221N13.3 | LTF      | -0.554334916 | 9.92E-37    |
| RP11-221N13.3 | CA4      | -0.445354618 | 8.93E-23    |
| RP11-221N13.3 | TG       | -0.498144904 | 6.55E-29    |
| RP11-221N13.3 | FCGBP    | -0.609116762 | 6.26E-46    |
| RP11-221N13.3 | PBX4     | -0.595163475 | 2.04E-43    |
| RP11-221N13.3 | CYR61    | -0.473138628 | 7.16E-26    |
| RP11-221N13.3 | FOS      | -0.464626236 | 6.82E-25    |
| RP11-221N13.3 | KHDRBS2  | -0.581754277 | 4.07E-41    |
| RP11-221N13.3 | MUM1L1   | -0.49489682  | 1.68E-28    |
| RP11-221N13.3 | RGS16    | -0.562392717 | 5.62E-38    |
| RP11-221N13.3 | MT1M     | -0.567209811 | 9.72E-39    |
| RP11-221N13.3 | LRP2     | -0.558242404 | 2.49E-37    |
| RP11-221N13.3 | MAFB     | -0.57220491  | 1.53E-39    |
| RP11-221N13.3 | KCNK2    | -0.60058735  | 2.22E-44    |
| RP11-221N13.3 | TBC1D4   | -0.484716559 | 3.01E-27    |
| RP11-221N13.3 | MIOX     | -0.533033389 | 1.36E-33    |
| RP11-221N13.3 | TPPP     | -0.562808018 | 4.83E-38    |
| RP11-221N13.3 | FMOD     | -0.639002824 | 9.44E-52    |
| RP11-221N13.3 | CITED2   | -0.561971034 | 6.54E-38    |
| RP11-221N13.3 | RGS8     | -0.607970539 | 1.02E-45    |
| RP11-221N13.3 | ABI3BP   | -0.334764996 | 5.89E-13    |
| RP11-221N13.3 | ADH1B    | -0.411700303 | 2.18E-19    |
| RP11-221N13.3 | OGN      | -0.316857901 | 1.08E-11    |
| RP11-221N13.3 | NR4A1    | -0.382971103 | 8.75E-17    |
| RP11-221N13.3 | FOXJ1    | -0.530722145 | 2.89E-33    |
| RP11-221N13.3 | ALDH1A1  | -0.475712557 | 3.58E-26    |
| RP11-221N13.3 | OCA2     | -0.557984077 | 2.73E-37    |
| RP11-221N13.3 | TMEM139  | -0.464373481 | 7.28E-25    |
| RP11-221N13.3 | ARHGAP24 | -0.49254047  | 3.30E-28    |
| RP11-221N13.3 | SLC25A15 | -0.590096322 | 1.55E-42    |
| RP11-221N13.3 | DES      | -0.367015648 | 1.91E-15    |
| RP11-221N13.3 | GDF10    | -0.481890932 | 6.60E-27    |
| RP11-221N13.3 | KIAA1324 | -0.467964387 | 2.84E-25    |
| RP11-221N13.3 | JUN      | -0.447617197 | 5.12E-23    |
| RP11-221N13.3 | C7       | -0.135759279 | 0.004377886 |
| RP11-221N13.3 | LGI3     | -0.513276721 | 7.11E-31    |
| RP11-221N13.3 | CDON     | -0.549264359 | 5.80E-36    |
| RP11-221N13.3 | BCL2     | -0.59677461  | 1.06E-43    |
| RP11-221N13.3 | HLF      | -0.45603938  | 6.22E-24    |
| RP11-221N13.3 | EGR1     | -0.388018116 | 3.18E-17    |
| RP11-221N13.3 | IP6K3    | -0.574517007 | 6.42E-40    |

|               |          |              |          |
|---------------|----------|--------------|----------|
| RP11-221N13.3 | SCUBE3   | -0.572494117 | 1.37E-39 |
| RP11-221N13.3 | PKNOX2   | -0.545084826 | 2.44E-35 |
| RP11-221N13.3 | SMAD9    | -0.545044686 | 2.47E-35 |
| RP11-221N13.3 | IQGAP2   | -0.657830081 | 9.19E-56 |
| RP11-221N13.3 | GNA14    | -0.667167117 | 7.33E-58 |
| RP11-221N13.3 | LAYN     | -0.5927172   | 5.45E-43 |
| RP11-221N13.3 | AVPR1A   | -0.511936355 | 1.07E-30 |
| RP11-221N13.3 | PDLIM3   | -0.535301568 | 6.47E-34 |
| RP11-221N13.3 | GPM6A    | -0.468711163 | 2.33E-25 |
| RP11-221N13.3 | SDPR     | -0.335059593 | 5.61E-13 |
| RP11-221N13.3 | CRYAB    | -0.406997848 | 6.05E-19 |
| RP11-221N13.3 | FOXA2    | -0.506273779 | 5.93E-30 |
| RP11-221N13.3 | C8orf88  | -0.438460578 | 4.74E-22 |
| RP11-221N13.3 | ISM1     | -0.462297544 | 1.25E-24 |
| RP11-221N13.3 | BMP2     | -0.446008048 | 7.60E-23 |
| RP11-221N13.3 | ID4      | -0.58165414  | 4.23E-41 |
| RP11-221N13.3 | NUPR1    | -0.38939536  | 2.41E-17 |
| RP11-221N13.3 | SERTM1   | -0.573032886 | 1.12E-39 |
| RP11-221N13.3 | IRS1     | -0.456975367 | 4.90E-24 |
| RP11-221N13.3 | FIBIN    | -0.347978458 | 6.09E-14 |
| RP11-221N13.3 | PODN     | -0.295875359 | 2.55E-10 |
| RP11-221N13.3 | TDRD9    | -0.467509939 | 3.20E-25 |
| RP11-221N13.3 | EPHA3    | -0.341790361 | 1.79E-13 |
| RP11-221N13.3 | AIF1L    | -0.569357943 | 4.40E-39 |
| RP11-221N13.3 | EBF4     | -0.633903048 | 1.03E-50 |
| RP11-221N13.3 | ADM2     | -0.549232729 | 5.87E-36 |
| RP11-221N13.3 | GSTM3    | -0.59168533  | 8.24E-43 |
| RP11-221N13.3 | HSD17B6  | -0.408785855 | 4.11E-19 |
| RP11-221N13.3 | AGR3     | -0.445472955 | 8.67E-23 |
| RP11-221N13.3 | EPHB1    | -0.443071439 | 1.56E-22 |
| RP11-221N13.3 | TMOD1    | -0.391202515 | 1.67E-17 |
| RP11-221N13.3 | WASF3    | -0.492266865 | 3.57E-28 |
| RP11-221N13.3 | SELV     | -0.626484864 | 3.09E-49 |
| RP11-221N13.3 | ENPP1    | -0.227224902 | 1.51E-06 |
| RP11-221N13.3 | SYNE1    | -0.565836487 | 1.61E-38 |
| RP11-221N13.3 | PLCH1    | -0.504979072 | 8.73E-30 |
| RP11-221N13.3 | CCDC146  | -0.575697381 | 4.11E-40 |
| RP11-221N13.3 | SLC16A2  | -0.525650787 | 1.48E-32 |
| RP11-221N13.3 | IER2     | -0.483524696 | 4.20E-27 |
| RP11-221N13.3 | KCNAB1   | -0.428384426 | 5.08E-21 |
| RP11-221N13.3 | SYNDIG1  | -0.59954158  | 3.42E-44 |
| RP11-221N13.3 | C16orf89 | -0.423050334 | 1.73E-20 |
| RP11-221N13.3 | CTGF     | -0.375955242 | 3.47E-16 |
| RP11-221N13.3 | NR4A3    | -0.283757877 | 1.42E-09 |
| RP11-221N13.3 | KIAA1456 | -0.449618953 | 3.12E-23 |
| RP11-221N13.3 | AQP4     | -0.350789398 | 3.71E-14 |
| RP11-221N13.3 | RNF150   | -0.652485352 | 1.35E-54 |
| RP11-221N13.3 | C1S      | -0.213083538 | 6.68E-06 |
| RP11-221N13.3 | PFKFB2   | -0.3990399   | 3.29E-18 |
| RP11-221N13.3 | PROX1    | -0.495598917 | 1.37E-28 |
| RP11-221N13.3 | TCF7L1   | -0.647631097 | 1.48E-53 |

|               |          |              |             |
|---------------|----------|--------------|-------------|
| RP11-221N13.3 | HSPB6    | -0.374546226 | 4.56E-16    |
| RP11-221N13.3 | FHDC1    | -0.337577497 | 3.67E-13    |
| RP11-221N13.3 | PRR15L   | -0.415944831 | 8.54E-20    |
| RP11-221N13.3 | SLC1A1   | -0.398512264 | 3.67E-18    |
| RP11-221N13.3 | BTBD11   | -0.535744244 | 5.59E-34    |
| RP11-221N13.3 | TRIM58   | -0.459061091 | 2.88E-24    |
| RP11-221N13.3 | LRIG1    | -0.514833816 | 4.40E-31    |
| RP11-221N13.3 | ROR2     | -0.577868491 | 1.81E-40    |
| RP11-221N13.3 | GPR125   | -0.582064902 | 3.61E-41    |
| RP11-221N13.3 | FLRT1    | -0.615038771 | 4.93E-47    |
| RP11-221N13.3 | PGF      | -0.652067214 | 1.67E-54    |
| RP11-221N13.3 | DUSP1    | -0.447153246 | 5.74E-23    |
| RP11-221N13.3 | PLA2G7   | -0.603606224 | 6.36E-45    |
| RP11-221N13.3 | PLSCR4   | -0.362986308 | 4.06E-15    |
| RP11-221N13.3 | FAM46B   | -0.563499903 | 3.76E-38    |
| RP11-221N13.3 | GLDC     | -0.560719883 | 1.03E-37    |
| RP11-221N13.3 | ZBTB16   | -0.370151525 | 1.06E-15    |
| RP11-221N13.3 | OMD      | -0.244144381 | 2.23E-07    |
| RP11-221N13.3 | HSD11B2  | -0.464387807 | 7.26E-25    |
| RP11-221N13.3 | FGL2     | -0.234379623 | 6.83E-07    |
| RP11-221N13.3 | CLCNKA   | -0.56981922  | 3.71E-39    |
| RP11-221N13.3 | GATM     | -0.342127509 | 1.69E-13    |
| RP11-221N13.3 | TNS3     | -0.597583227 | 7.62E-44    |
| RP11-221N13.3 | TOB1     | -0.549224644 | 5.88E-36    |
| RP11-221N13.3 | MARC2    | -0.556347877 | 4.88E-37    |
| RP11-221N13.3 | LRRC2    | -0.458835427 | 3.05E-24    |
| RP11-221N13.3 | SORD     | -0.434511532 | 1.21E-21    |
| RP11-221N13.3 | RIMS4    | -0.484821518 | 2.93E-27    |
| RP11-221N13.3 | SLC29A4  | -0.622072079 | 2.24E-48    |
| RP11-221N13.3 | SLC39A14 | -0.526091193 | 1.29E-32    |
| RP11-221N13.3 | FAXDC2   | -0.557297055 | 3.48E-37    |
| RP11-221N13.3 | HSPB8    | -0.5668277   | 1.12E-38    |
| RP11-221N13.3 | CCL19    | -0.083721011 | 0.079734953 |
| RP11-221N13.3 | KCNIP3   | -0.540089727 | 1.32E-34    |
| RP11-221N13.3 | CGNL1    | -0.395243613 | 7.26E-18    |
| RP11-221N13.3 | ATF3     | -0.268261112 | 1.13E-08    |
| RP11-221N13.3 | SGCD     | -0.527698782 | 7.69E-33    |
| RP11-221N13.3 | STARD13  | -0.596762979 | 1.06E-43    |
| RP11-221N13.3 | LDHD     | -0.461474602 | 1.55E-24    |
| RP11-221N13.3 | RCAN1    | -0.53229858  | 1.73E-33    |
| RP11-221N13.3 | ID3      | -0.616817984 | 2.27E-47    |
| RP11-221N13.3 | SYTL3    | -0.514416955 | 5.01E-31    |
| RP11-221N13.3 | MT1E     | -0.395350559 | 7.10E-18    |
| RP11-221N13.3 | CAMK1D   | -0.45753208  | 4.25E-24    |
| RP11-221N13.3 | PRKCQ    | -0.514883601 | 4.34E-31    |
| RP11-221N13.3 | NUAK2    | -0.59154945  | 8.70E-43    |
| RP11-221N13.3 | LIPG     | -0.401485467 | 1.96E-18    |
| RP11-221N13.3 | SLC25A25 | -0.45062132  | 2.43E-23    |
| RP11-221N13.3 | PRKX     | -0.421049145 | 2.72E-20    |
| RP11-221N13.3 | SRPX     | -0.249355702 | 1.20E-07    |
| RP11-221N13.3 | FAM189A1 | -0.512516329 | 8.97E-31    |

|               |          |              |             |
|---------------|----------|--------------|-------------|
| RP11-221N13.3 | PLEKHH1  | -0.391623914 | 1.53E-17    |
| RP11-221N13.3 | WNT11    | -0.595368856 | 1.87E-43    |
| RP11-221N13.3 | SNAI1    | -0.591624056 | 8.44E-43    |
| RP11-221N13.3 | FDCSP    | -0.109746443 | 0.021457391 |
| RP11-221N13.3 | MT1X     | -0.314302917 | 1.60E-11    |
| RP11-221N13.3 | ACACB    | -0.583856029 | 1.80E-41    |
| RP11-221N13.3 | ARC      | -0.165085081 | 0.000514844 |
| RP11-221N13.3 | KLK4     | -0.45073859  | 2.36E-23    |
| RP11-221N13.3 | ZFPM2    | -0.385048884 | 5.78E-17    |
| RP11-221N13.3 | AKAP12   | -0.433027342 | 1.72E-21    |
| RP11-221N13.3 | GJB6     | -0.548886439 | 6.61E-36    |
| RP11-221N13.3 | ERO1LB   | -0.588471996 | 2.95E-42    |
| RP11-221N13.3 | DNALI1   | -0.484028929 | 3.65E-27    |
| RP11-221N13.3 | HKDC1    | -0.452359542 | 1.57E-23    |
| RP11-221N13.3 | ZFP36L2  | -0.583038476 | 2.48E-41    |
| RP11-221N13.3 | CAPSL    | -0.484051586 | 3.63E-27    |
| RP11-221N13.3 | CYP7B1   | -0.48863128  | 1.00E-27    |
| RP11-221N13.3 | CPQ      | -0.48554021  | 2.39E-27    |
| RP11-221N13.3 | RPS6KA6  | -0.586064818 | 7.61E-42    |
| RP11-221N13.3 | TLE1     | -0.607150182 | 1.44E-45    |
| RP11-221N13.3 | TP53INP2 | -0.601847295 | 1.32E-44    |
| RP11-221N13.3 | KATNAL2  | -0.591347331 | 9.43E-43    |
| RP11-221N13.3 | SGPP2    | -0.318586984 | 8.20E-12    |
| RP11-221N13.3 | CTH      | -0.560630809 | 1.06E-37    |
| RP11-221N13.3 | KIF12    | -0.457535342 | 4.25E-24    |
| RP11-221N13.3 | TMEM220  | -0.387097589 | 3.83E-17    |
| RP11-221N13.3 | CENPJ    | -0.53293146  | 1.41E-33    |
| RP11-221N13.3 | FAM155B  | -0.223232454 | 2.32E-06    |
| RP11-221N13.3 | WFS1     | -0.690522119 | 1.85E-63    |
| RP11-221N13.3 | SELENBP1 | -0.346948432 | 7.30E-14    |
| RP11-221N13.3 | SNTA1    | -0.472703612 | 8.05E-26    |
| RP11-221N13.3 | FRAS1    | -0.444894054 | 9.99E-23    |
| RP11-221N13.3 | FBLN7    | -0.600614583 | 2.20E-44    |
| RP11-221N13.3 | AGPAT9   | -0.437075817 | 6.60E-22    |
| RP11-221N13.3 | GPR83    | -0.419133485 | 4.19E-20    |
| RP11-221N13.3 | PRTG     | -0.471238144 | 1.19E-25    |
| RP11-221N13.3 | EGR3     | -0.192086305 | 5.10E-05    |
| RP11-221N13.3 | GRAMD2   | -0.58397191  | 1.72E-41    |
| RP11-221N13.3 | HYOU1    | -0.623501378 | 1.18E-48    |
| RP11-221N13.3 | FBLN5    | -0.428371093 | 5.10E-21    |
| RP11-221N13.3 | ITM2A    | -0.487354599 | 1.44E-27    |
| RP11-221N13.3 | SRF      | -0.492644721 | 3.21E-28    |
| RP11-221N13.3 | FGFR2    | -0.469950399 | 1.68E-25    |
| RP11-221N13.3 | MT1A     | -0.348366822 | 5.69E-14    |
| RP11-221N13.3 | MAMDC2   | -0.304053439 | 7.66E-11    |
| RP11-221N13.3 | FHL2     | -0.502962281 | 1.59E-29    |
| RP11-221N13.3 | FTCDNL1  | -0.482634664 | 5.37E-27    |
| RP11-221N13.3 | PKIA     | -0.35753747  | 1.10E-14    |
| RP11-221N13.3 | DNAJB4   | -0.369987419 | 1.09E-15    |
| RP11-221N13.3 | SLC25A33 | -0.545711323 | 1.97E-35    |
| RP11-221N13.3 | EYA2     | -0.442672308 | 1.72E-22    |

|               |          |              |             |
|---------------|----------|--------------|-------------|
| RP11-221N13.3 | LPAR1    | -0.498191853 | 6.46E-29    |
| RP11-221N13.3 | STX11    | -0.272484614 | 6.51E-09    |
| RP11-221N13.3 | ARHGEF28 | -0.387736142 | 3.37E-17    |
| RP11-221N13.3 | OR2W3    | -0.514955087 | 4.24E-31    |
| RP11-221N13.3 | ALDH1B1  | -0.596689316 | 1.10E-43    |
| RP11-221N13.3 | CXCL12   | -0.270980709 | 7.94E-09    |
| RP11-221N13.3 | OLFM2    | -0.491500232 | 4.45E-28    |
| RP11-221N13.3 | TUB      | -0.465242521 | 5.80E-25    |
| RP11-221N13.3 | HTRA3    | -0.427280503 | 6.56E-21    |
| RP11-221N13.3 | CKB      | -0.530870274 | 2.76E-33    |
| RP11-221N13.3 | RGS2     | -0.250368849 | 1.06E-07    |
| RP11-221N13.3 | SHANK2   | -0.528548957 | 5.85E-33    |
| RP11-221N13.3 | CNTFR    | -0.437365967 | 6.16E-22    |
| RP11-221N13.3 | CYTH3    | -0.515539459 | 3.54E-31    |
| RP11-221N13.3 | PLAC9    | -0.350991659 | 3.58E-14    |
| RP11-221N13.3 | WVOX     | -0.539574714 | 1.56E-34    |
| RP11-221N13.3 | NPR3     | -0.516614589 | 2.54E-31    |
| RP11-221N13.3 | SDC2     | -0.433780217 | 1.44E-21    |
| RP11-221N13.3 | KLF15    | -0.426706202 | 7.49E-21    |
| RP11-221N13.3 | TMEM164  | -0.643902467 | 9.08E-53    |
| RP11-221N13.3 | LONRF3   | -0.113380121 | 0.017479087 |
| RP11-221N13.3 | GBP1     | -0.20666382  | 1.27E-05    |
| RP11-221N13.3 | ARHGAP6  | -0.48967705  | 7.47E-28    |
| RP11-221N13.3 | TMEM119  | -0.279818334 | 2.44E-09    |
| RP11-221N13.3 | SH3RF1   | -0.458735857 | 3.13E-24    |
| RP11-221N13.3 | CRELD2   | -0.56544308  | 1.86E-38    |
| RP11-221N13.3 | PCP4     | -0.241374067 | 3.07E-07    |
| RP11-221N13.3 | GCSH     | -0.487927339 | 1.22E-27    |
| RP11-221N13.3 | IMPA2    | -0.550147866 | 4.28E-36    |
| RP11-221N13.3 | C1R      | -0.202860725 | 1.84E-05    |
| RP11-221N13.3 | SUCNR1   | -0.310177567 | 3.03E-11    |
| RP11-221N13.3 | SFRP1    | -0.394258267 | 8.90E-18    |
| RP11-221N13.3 | UGT8     | -0.51536131  | 3.74E-31    |
| RP11-221N13.3 | TLE4     | -0.337922162 | 3.46E-13    |
| RP11-221N13.3 | ANTXR1   | -0.426699252 | 7.50E-21    |
| RP11-221N13.3 | GPX3     | -0.500527778 | 3.26E-29    |
| RP11-221N13.3 | DPY19L2  | -0.470791213 | 1.34E-25    |
| RP11-221N13.3 | FAM46C   | -0.401117823 | 2.12E-18    |
| RP11-221N13.3 | IL33     | -0.324690699 | 3.09E-12    |
| RP11-221N13.3 | PEG3     | -0.491675402 | 4.23E-28    |
| RP11-221N13.3 | FAHD2A   | -0.56546237  | 1.84E-38    |
| RP11-221N13.3 | PTGDS    | -0.186512933 | 8.45E-05    |
| RP11-221N13.3 | CHCHD10  | -0.426048074 | 8.71E-21    |
| RP11-221N13.3 | CD36     | -0.484379268 | 3.31E-27    |
| RP11-221N13.3 | ANKRD37  | -0.528104012 | 6.75E-33    |
| RP11-221N13.3 | TSPAN33  | -0.559512844 | 1.58E-37    |
| RP11-221N13.3 | PRDM16   | -0.489169129 | 8.62E-28    |
| RP11-221N13.3 | UST      | -0.322792189 | 4.20E-12    |
| RP11-221N13.3 | NEXN     | -0.504420799 | 1.03E-29    |
| RP11-221N13.3 | NUPR1L   | -0.178675256 | 0.000167676 |
| RP11-221N13.3 | SLC24A3  | -0.603853448 | 5.74E-45    |

|               |          |              |             |
|---------------|----------|--------------|-------------|
| RP11-221N13.3 | MARC1    | -0.507320245 | 4.33E-30    |
| RP11-221N13.3 | MYH11    | -0.343331712 | 1.37E-13    |
| RP11-221N13.3 | APOA1    | -0.500503825 | 3.28E-29    |
| RP11-221N13.3 | TMEM178B | -0.507874406 | 3.67E-30    |
| RP11-221N13.3 | CAPN6    | -0.374497415 | 4.60E-16    |
| RP11-221N13.3 | PPM1L    | -0.516129078 | 2.95E-31    |
| RP11-221N13.3 | FZD8     | -0.601638368 | 1.44E-44    |
| RP11-221N13.3 | RCAN2    | -0.534501036 | 8.42E-34    |
| RP11-221N13.3 | COPZ2    | -0.588335832 | 3.12E-42    |
| RP11-221N13.3 | GAS1     | -0.351613333 | 3.20E-14    |
| RP11-221N13.3 | DACT1    | -0.530543905 | 3.07E-33    |
| RP11-221N13.3 | WBSCR17  | -0.474239856 | 5.33E-26    |
| RP11-221N13.3 | NCS1     | -0.542539264 | 5.78E-35    |
| RP11-221N13.3 | SPIRE2   | -0.555819531 | 5.88E-37    |
| RP11-221N13.3 | C15orf52 | -0.435051367 | 1.07E-21    |
| RP11-221N13.3 | SPAG5    | -0.555369055 | 6.89E-37    |
| RP11-221N13.3 | ARL4D    | -0.507556405 | 4.03E-30    |
| RP11-221N13.3 | FAM189A2 | -0.353138231 | 2.44E-14    |
| RP11-221N13.3 | MAP1LC3A | -0.545593598 | 2.05E-35    |
| RP11-221N13.3 | KLF6     | -0.179484874 | 0.00015642  |
| RP11-221N13.3 | ADD3     | -0.289019774 | 6.81E-10    |
| RP11-221N13.3 | TSPAN7   | -0.428839441 | 4.58E-21    |
| RP11-221N13.3 | KLF9     | -0.311108164 | 2.63E-11    |
| RP11-221N13.3 | KCNQ1    | -0.437369704 | 6.15E-22    |
| RP11-221N13.3 | MAN1A1   | -0.265779235 | 1.56E-08    |
| RP11-221N13.3 | MLF1     | -0.292238214 | 4.31E-10    |
| RP11-221N13.3 | RARB     | -0.559924315 | 1.36E-37    |
| RP11-221N13.3 | CDC42EP2 | -0.424520057 | 1.24E-20    |
| RP11-221N13.3 | FAM3B    | -0.241665686 | 2.97E-07    |
| RP11-221N13.3 | GADD45B  | -0.350120066 | 4.18E-14    |
| RP11-221N13.3 | TMEM47   | -0.410766619 | 2.67E-19    |
| RP11-221N13.3 | SDF2L1   | -0.460212246 | 2.14E-24    |
| RP11-221N13.3 | CCDC85A  | -0.414580352 | 1.16E-19    |
| RP11-221N13.3 | CRYBG3   | -0.276807686 | 3.66E-09    |
| RP11-221N13.3 | FBLN2    | -0.21878811  | 3.71E-06    |
| RP11-221N13.3 | PEBP4    | -0.041260172 | 0.388467932 |
| RP11-221N13.3 | CDADC1   | -0.484081267 | 3.60E-27    |
| RP11-221N13.3 | FAM63A   | -0.431861861 | 2.26E-21    |
| RP11-221N13.3 | GLUL     | -0.388229737 | 3.05E-17    |
| RP11-221N13.3 | FREM2    | -0.344372659 | 1.14E-13    |
| RP11-221N13.3 | ACKR3    | -0.580226685 | 7.33E-41    |
| RP11-221N13.3 | DENND6A  | -0.641689798 | 2.63E-52    |
| RP11-221N13.3 | CLDN8    | -0.317413702 | 9.87E-12    |
| RP11-221N13.3 | UTS2R    | -0.357223475 | 1.17E-14    |
| RP11-221N13.3 | SCNN1B   | -0.408892233 | 4.02E-19    |
| RP11-221N13.3 | TTC30A   | -0.577935296 | 1.76E-40    |
| RP11-221N13.3 | CORO2B   | -0.49285308  | 3.02E-28    |
| RP11-221N13.3 | TC2N     | -0.493767792 | 2.32E-28    |
| RP11-221N13.3 | ALDH2    | -0.509739855 | 2.09E-30    |
| RP11-221N13.3 | GPR183   | -0.126974417 | 0.007730636 |
| RP11-221N13.3 | C4orf47  | -0.410615703 | 2.76E-19    |

|               |          |              |             |
|---------------|----------|--------------|-------------|
| RP11-221N13.3 | SLC25A42 | -0.505186439 | 8.21E-30    |
| RP11-221N13.3 | LGMN     | -0.56009296  | 1.28E-37    |
| RP11-221N13.3 | ACSF2    | -0.60754747  | 1.22E-45    |
| RP11-221N13.3 | KIAA1467 | -0.612832627 | 1.28E-46    |
| RP11-221N13.3 | PRKG1    | -0.473534923 | 6.44E-26    |
| RP11-221N13.3 | GNAI1    | -0.488800634 | 9.57E-28    |
| RP11-221N13.3 | ABCC4    | -0.439731728 | 3.49E-22    |
| RP11-221N13.3 | PRPS1    | -0.571078719 | 2.33E-39    |
| RP11-221N13.3 | TSPAN5   | -0.542251192 | 6.37E-35    |
| RP11-221N13.3 | CR2      | -0.166621491 | 0.000455424 |
| RP11-221N13.3 | CCDC170  | -0.486356628 | 1.90E-27    |
| RP11-221N13.3 | RRAD     | -0.202220753 | 1.96E-05    |
| RP11-221N13.3 | SCGB2A1  | -0.414811689 | 1.10E-19    |
| RP11-221N13.3 | SESN3    | -0.274225105 | 5.17E-09    |
| RP11-221N13.3 | SGK223   | -0.493843675 | 2.27E-28    |
| RP11-221N13.3 | NDRG2    | -0.546026629 | 1.77E-35    |
| RP11-221N13.3 | C3orf52  | -0.426793999 | 7.34E-21    |
| RP11-221N13.3 | FLRT3    | 0.369956498  | 1.10E-15    |
| RP11-221N13.3 | MST1R    | 0.580508375  | 6.57E-41    |
| RP11-221N13.3 | SDC1     | 0.143107608  | 0.002652565 |
| RP11-221N13.3 | ST8SIA4  | 0.390508219  | 1.92E-17    |
| RP11-221N13.3 | UBTD1    | 0.443825874  | 1.30E-22    |
| RP11-221N13.3 | EPHA2    | 0.280146547  | 2.33E-09    |
| RP11-221N13.3 | TMEM130  | 0.327146182  | 2.08E-12    |
| RP11-221N13.3 | SPINK2   | 0.521257647  | 5.96E-32    |
| RP11-221N13.3 | MMP16    | 0.490023559  | 6.77E-28    |
| RP11-221N13.3 | SIGLEC15 | 0.512790501  | 8.25E-31    |
| RP11-221N13.3 | RIN1     | 0.549226913  | 5.88E-36    |
| RP11-221N13.3 | IL1RN    | 0.337874363  | 3.49E-13    |
| RP11-221N13.3 | FCER1G   | 0.293376745  | 3.66E-10    |
| RP11-221N13.3 | CD276    | 0.511751966  | 1.13E-30    |
| RP11-221N13.3 | CTSB     | 0.571939957  | 1.69E-39    |
| RP11-221N13.3 | FAM171A2 | 0.392046875  | 1.40E-17    |
| RP11-221N13.3 | ASPHD1   | 0.537339635  | 3.29E-34    |
| RP11-221N13.3 | C15orf48 | 0.338022725  | 3.40E-13    |
| RP11-221N13.3 | DYSF     | 0.24577586   | 1.84E-07    |
| RP11-221N13.3 | PDZRN4   | 0.320755541  | 5.81E-12    |
| RP11-221N13.3 | EFHD2    | 0.334562026  | 6.10E-13    |
| RP11-221N13.3 | ASF1B    | 0.368773997  | 1.37E-15    |
| RP11-221N13.3 | AQP1     | 0.251097044  | 9.73E-08    |
| RP11-221N13.3 | ARRDC2   | 0.474323824  | 5.21E-26    |
| RP11-221N13.3 | PRSS1    | 0.532471432  | 1.64E-33    |
| RP11-221N13.3 | MAPK13   | 0.654298747  | 5.47E-55    |
| RP11-221N13.3 | CST5     | 0.33898317   | 2.89E-13    |
| RP11-221N13.3 | AHR      | 0.354473775  | 1.92E-14    |
| RP11-221N13.3 | BAX      | 0.312064434  | 2.27E-11    |
| RP11-221N13.3 | C1orf115 | 0.483343995  | 4.41E-27    |
| RP11-221N13.3 | PLK3     | 0.372023074  | 7.40E-16    |
| RP11-221N13.3 | JAG2     | 0.244471378  | 2.14E-07    |
| RP11-221N13.3 | RAD23B   | 0.670171666  | 1.49E-58    |
| RP11-221N13.3 | CA12     | 0.083087127  | 0.08205007  |

|               |          |             |             |
|---------------|----------|-------------|-------------|
| RP11-221N13.3 | ADTRP    | 0.412724121 | 1.74E-19    |
| RP11-221N13.3 | UCP2     | 0.303215178 | 8.68E-11    |
| RP11-221N13.3 | IGFBP2   | 0.205431109 | 1.44E-05    |
| RP11-221N13.3 | LOXL2    | 0.188975662 | 6.77E-05    |
| RP11-221N13.3 | GPX1     | 0.374052914 | 5.01E-16    |
| RP11-221N13.3 | P3H3     | 0.425082443 | 1.09E-20    |
| RP11-221N13.3 | C2orf81  | 0.503043412 | 1.55E-29    |
| RP11-221N13.3 | CDT1     | 0.430735812 | 2.94E-21    |
| RP11-221N13.3 | SNX25    | 0.482262908 | 5.96E-27    |
| RP11-221N13.3 | MTHFD1L  | 0.434303314 | 1.27E-21    |
| RP11-221N13.3 | CDC42BPG | 0.536317926 | 4.62E-34    |
| RP11-221N13.3 | MSN      | 0.599715615 | 3.18E-44    |
| RP11-221N13.3 | SIGLEC6  | 0.425175314 | 1.06E-20    |
| RP11-221N13.3 | F2R      | 0.021420193 | 0.654460203 |
| RP11-221N13.3 | TMEM184A | 0.505030701 | 8.60E-30    |
| RP11-221N13.3 | CKS2     | 0.251037188 | 9.80E-08    |
| RP11-221N13.3 | TAX1BP3  | 0.409058751 | 3.88E-19    |
| RP11-221N13.3 | PMEPA1   | 0.395592534 | 6.75E-18    |
| RP11-221N13.3 | CXCL16   | 0.397903071 | 4.17E-18    |
| RP11-221N13.3 | FAXC     | 0.543070872 | 4.83E-35    |
| RP11-221N13.3 | VTCN1    | 0.34225948  | 1.65E-13    |
| RP11-221N13.3 | SH2D4A   | 0.565150043 | 2.06E-38    |
| RP11-221N13.3 | RNF24    | 0.460477624 | 2.00E-24    |
| RP11-221N13.3 | LY6G6C   | 0.429140077 | 4.27E-21    |
| RP11-221N13.3 | NID1     | 0.227121219 | 1.52E-06    |
| RP11-221N13.3 | STAC     | 0.511987274 | 1.05E-30    |
| RP11-221N13.3 | RAB34    | 0.591098122 | 1.04E-42    |
| RP11-221N13.3 | HES4     | 0.278758097 | 2.81E-09    |
| RP11-221N13.3 | EPHA10   | 0.607609878 | 1.19E-45    |
| RP11-221N13.3 | ENTPD2   | 0.575171021 | 5.02E-40    |
| RP11-221N13.3 | DDB2     | 0.482696222 | 5.28E-27    |
| RP11-221N13.3 | NKAIN4   | 0.261869904 | 2.57E-08    |
| RP11-221N13.3 | TRIM29   | 0.218180761 | 3.95E-06    |
| RP11-221N13.3 | ADCY8    | 0.74332829  | 2.51E-78    |
| RP11-221N13.3 | SFTA2    | 0.345443817 | 9.50E-14    |
| RP11-221N13.3 | NRIP1    | 0.482475806 | 5.62E-27    |
| RP11-221N13.3 | VWA1     | 0.19812065  | 2.91E-05    |
| RP11-221N13.3 | APLNR    | 0.153500484 | 0.001254621 |
| RP11-221N13.3 | REN      | 0.661655631 | 1.30E-56    |
| RP11-221N13.3 | EDIL3    | 0.255289342 | 5.84E-08    |
| RP11-221N13.3 | AGRN     | 0.374935996 | 4.23E-16    |
| RP11-221N13.3 | TREM1    | 0.49019263  | 6.45E-28    |
| RP11-221N13.3 | SRL      | 0.320849438 | 5.73E-12    |
| RP11-221N13.3 | RASGRF1  | 0.521601036 | 5.35E-32    |
| RP11-221N13.3 | RMI2     | 0.451446816 | 1.98E-23    |
| RP11-221N13.3 | SAMD1    | 0.402684137 | 1.52E-18    |
| RP11-221N13.3 | MGAT4B   | 0.613740105 | 8.64E-47    |
| RP11-221N13.3 | NXN      | 0.397927325 | 4.15E-18    |
| RP11-221N13.3 | SH3BGRL3 | 0.443297812 | 1.47E-22    |
| RP11-221N13.3 | CA11     | 0.608629266 | 7.70E-46    |
| RP11-221N13.3 | PLD3     | 0.468664498 | 2.36E-25    |



|               |          |             |          |
|---------------|----------|-------------|----------|
| RP11-221N13.3 | LURAP1L  | 0.455682091 | 6.81E-24 |
| RP11-221N13.3 | CARNS1   | 0.381723641 | 1.12E-16 |
| RP11-221N13.3 | PDLIM7   | 0.478297125 | 1.77E-26 |
| RP11-221N13.3 | BCL2L1   | 0.464729494 | 6.64E-25 |
| RP11-221N13.3 | GGT6     | 0.301231577 | 1.17E-10 |
| RP11-221N13.3 | DPYSL3   | 0.311528004 | 2.46E-11 |
| RP11-221N13.3 | FYN      | 0.511848415 | 1.10E-30 |
| RP11-221N13.3 | TK1      | 0.308640471 | 3.83E-11 |
| RP11-221N13.3 | AK1      | 0.487663947 | 1.32E-27 |
| RP11-221N13.3 | HIGD1B   | 0.230014567 | 1.11E-06 |
| RP11-221N13.3 | TMEM59L  | 0.224587713 | 2.00E-06 |
| RP11-221N13.3 | MEGF9    | 0.453922593 | 1.06E-23 |
| RP11-221N13.3 | ZFP36L1  | 0.379865992 | 1.62E-16 |
| RP11-221N13.3 | ADRA1B   | 0.462249036 | 1.27E-24 |
| RP11-221N13.3 | EPHA4    | 0.501037827 | 2.81E-29 |
| RP11-221N13.3 | TCERG1L  | 0.244868382 | 2.04E-07 |
| RP11-221N13.3 | NGFR     | 0.404510298 | 1.03E-18 |
| RP11-221N13.3 | EBI3     | 0.426204805 | 8.41E-21 |
| RP11-221N13.3 | S100A10  | 0.30445257  | 7.21E-11 |
| RP11-221N13.3 | S100B    | 0.430334127 | 3.23E-21 |
| RP11-221N13.3 | CD44     | 0.500530189 | 3.26E-29 |
| RP11-221N13.3 | BHLHE41  | 0.497086937 | 8.91E-29 |
| RP11-221N13.3 | FBXO2    | 0.504416685 | 1.03E-29 |
| RP11-221N13.3 | SLC30A2  | 0.190533466 | 5.88E-05 |
| RP11-221N13.3 | FRMD5    | 0.542574156 | 5.71E-35 |
| RP11-221N13.3 | SAMD11   | 0.274516582 | 4.97E-09 |
| RP11-221N13.3 | SIPA1L2  | 0.476923993 | 2.58E-26 |
| RP11-221N13.3 | S100A16  | 0.443833534 | 1.29E-22 |
| RP11-221N13.3 | PPL      | 0.452144374 | 1.66E-23 |
| RP11-221N13.3 | ARHGD1B  | 0.195246025 | 3.81E-05 |
| RP11-221N13.3 | CDC42EP3 | 0.430984169 | 2.78E-21 |
| RP11-221N13.3 | RUNX2    | 0.596591923 | 1.14E-43 |
| RP11-221N13.3 | LAMC2    | 0.389151683 | 2.53E-17 |
| RP11-221N13.3 | BRINP1   | 0.520201807 | 8.31E-32 |
| RP11-221N13.3 | GPRC5B   | 0.554615471 | 8.98E-37 |
| RP11-221N13.3 | AQP5     | 0.252960934 | 7.76E-08 |
| RP11-221N13.3 | PLAG1    | 0.619407374 | 7.29E-48 |
| RP11-221N13.3 | PTPRU    | 0.333069042 | 7.82E-13 |
| RP11-221N13.3 | ANGPTL4  | 0.381805481 | 1.10E-16 |
| RP11-221N13.3 | PALM3    | 0.356436242 | 1.35E-14 |
| RP11-221N13.3 | ACP5     | 0.299733912 | 1.45E-10 |
| RP11-221N13.3 | DLG4     | 0.567001593 | 1.05E-38 |
| RP11-221N13.3 | ETNK2    | 0.606706088 | 1.74E-45 |
| RP11-221N13.3 | CD109    | 0.444335072 | 1.15E-22 |
| RP11-221N13.3 | SNX22    | 0.437816919 | 5.53E-22 |
| RP11-221N13.3 | TMEM98   | 0.487337153 | 1.45E-27 |
| RP11-221N13.3 | CTHRC1   | 0.224777918 | 1.96E-06 |
| RP11-221N13.3 | S100A2   | 0.350697771 | 3.77E-14 |
| RP11-221N13.3 | C11orf80 | 0.611894938 | 1.91E-46 |
| RP11-221N13.3 | SREBF1   | 0.463382036 | 9.43E-25 |
| RP11-221N13.3 | PRSS22   | 0.518304727 | 1.50E-31 |

|               |          |              |             |
|---------------|----------|--------------|-------------|
| RP11-221N13.3 | CMTM3    | 0.440506871  | 2.90E-22    |
| RP11-221N13.3 | RDH5     | 0.669641335  | 1.98E-58    |
| RP11-221N13.3 | MYH10    | 0.549411586  | 5.52E-36    |
| RP11-221N13.3 | EVPL     | 0.404975384  | 9.35E-19    |
| RP11-221N13.3 | SCD      | 0.315664843  | 1.30E-11    |
| RP11-221N13.3 | CD151    | 0.510566628  | 1.62E-30    |
| RP11-221N13.3 | S100A4   | 0.366261058  | 2.20E-15    |
| RP11-221N13.3 | BNIP1    | 0.53148202   | 2.26E-33    |
| RP11-221N13.3 | MAP3K6   | 0.574012632  | 7.76E-40    |
| RP11-221N13.3 | MANEAL   | 0.540336808  | 1.21E-34    |
| RP11-221N13.3 | CD207    | 0.474557484  | 4.89E-26    |
| RP11-221N13.3 | CD1A     | 0.479072118  | 1.43E-26    |
| RP11-221N13.3 | C3       | 0.263643159  | 2.05E-08    |
| RP11-221N13.3 | NT5E     | 0.420013304  | 3.44E-20    |
| RP11-221N13.3 | CACNG4   | 0.375544462  | 3.76E-16    |
| RP11-221N13.3 | FHOD1    | 0.531604142  | 2.17E-33    |
| RP11-221N13.3 | LEMD1    | 0.514038248  | 5.63E-31    |
| RP11-221N13.3 | ATP11A   | 0.438446962  | 4.76E-22    |
| RP11-221N13.3 | PPAP2C   | 0.397145516  | 4.89E-18    |
| RP11-221N13.3 | DRAM1    | 0.399591082  | 2.93E-18    |
| RP11-221N13.3 | CDA      | 0.193777153  | 4.36E-05    |
| RP11-221N13.3 | CCND2    | 0.523126359  | 3.31E-32    |
| RP11-221N13.3 | LCN6     | 0.362836895  | 4.17E-15    |
| RP11-221N13.3 | CDH4     | 0.476048855  | 3.27E-26    |
| RP11-221N13.3 | MMP11    | 0.404709013  | 9.89E-19    |
| RP11-221N13.3 | B3GAT1   | 0.317191159  | 1.02E-11    |
| RP11-221N13.3 | SPP1     | 0.231339615  | 9.59E-07    |
| RP11-221N13.3 | HLA-DQB1 | 0.308028441  | 4.21E-11    |
| RP11-221N13.3 | SDC3     | 0.484134882  | 3.54E-27    |
| RP11-221N13.3 | CX3CL1   | 0.273024307  | 6.06E-09    |
| RP11-221N13.3 | SDK1     | 0.350532104  | 3.88E-14    |
| RP11-221N13.3 | DOCK9    | 0.561243548  | 8.50E-38    |
| RP11-221N13.3 | CSF2     | 0.586629739  | 6.10E-42    |
| RP11-221N13.3 | GRHL3    | 0.514824313  | 4.42E-31    |
| RP11-221N13.3 | TMEM92   | 0.58175565   | 4.07E-41    |
| RP11-221N13.3 | BASP1    | 0.464977568  | 6.22E-25    |
| RP11-221N13.3 | HRH1     | 0.399817739  | 2.79E-18    |
| RP11-221N13.3 | ESM1     | -0.007744057 | 0.871466644 |
| RP11-221N13.3 | B4GALNT3 | 0.538560574  | 2.19E-34    |
| RP11-221N13.3 | LMO3     | 0.472428588  | 8.66E-26    |
| RP11-221N13.3 | C9orf16  | 0.444204723  | 1.18E-22    |
| RP11-221N13.3 | SEMA3F   | 0.306048387  | 5.68E-11    |
| RP11-221N13.3 | PLA2G12B | 0.584506014  | 1.40E-41    |
| RP11-221N13.3 | KLK6     | 0.422961631  | 1.76E-20    |
| RP11-221N13.3 | ST3GAL5  | 0.617636104  | 1.59E-47    |
| RP11-221N13.3 | FAM132B  | 0.314808994  | 1.48E-11    |
| RP11-221N13.3 | CDKN1A   | 0.161872173  | 0.000663079 |
| RP11-221N13.3 | E2F1     | 0.442543236  | 1.77E-22    |
| RP11-221N13.3 | B3GNT8   | 0.473445139  | 6.60E-26    |
| RP11-221N13.3 | MTMR11   | 0.5694534    | 4.25E-39    |
| RP11-221N13.3 | MYO1G    | 0.287862945  | 8.01E-10    |

|               |          |             |          |
|---------------|----------|-------------|----------|
| RP11-221N13.3 | TMSB10   | 0.418777472 | 4.54E-20 |
| RP11-221N13.3 | UNC5CL   | 0.622798288 | 1.62E-48 |
| RP11-221N13.3 | ABR      | 0.532437723 | 1.65E-33 |
| RP11-221N13.3 | PLP2     | 0.56905512  | 4.92E-39 |
| RP11-221N13.3 | SRCIN1   | 0.619574458 | 6.77E-48 |
| RP11-221N13.3 | PDE9A    | 0.542415582 | 6.02E-35 |
| RP11-221N13.3 | TREM2    | 0.274944648 | 4.70E-09 |
| RP11-221N13.3 | KDELR3   | 0.358831597 | 8.71E-15 |
| RP11-221N13.3 | PC       | 0.597589751 | 7.60E-44 |
| RP11-221N13.3 | C2CD4A   | 0.521960311 | 4.78E-32 |
| RP11-221N13.3 | PELI1    | 0.37940275  | 1.77E-16 |
| RP11-221N13.3 | SSX1     | 0.207596262 | 1.16E-05 |
| RP11-221N13.3 | MROH6    | 0.51365018  | 6.34E-31 |
| RP11-221N13.3 | ESPN     | 0.547071689 | 1.23E-35 |
| RP11-221N13.3 | BMP1     | 0.544204723 | 3.29E-35 |
| RP11-221N13.3 | TM4SF4   | 0.485521123 | 2.41E-27 |
| RP11-221N13.3 | CORO2A   | 0.587789757 | 3.86E-42 |
| RP11-221N13.3 | CD164L2  | 0.61053431  | 3.42E-46 |
| RP11-221N13.3 | CTSS     | 0.376835912 | 2.92E-16 |
| RP11-221N13.3 | CLU      | 0.436172878 | 8.18E-22 |
| RP11-221N13.3 | TMSB4X   | 0.39486519  | 7.85E-18 |
| RP11-221N13.3 | WNT10A   | 0.389348851 | 2.43E-17 |
| RP11-221N13.3 | NAPSA    | 0.383200739 | 8.36E-17 |
| RP11-221N13.3 | PLEKHA4  | 0.540794518 | 1.04E-34 |
| RP11-221N13.3 | SFTPA1   | 0.257720733 | 4.32E-08 |
| RP11-221N13.3 | C1orf116 | 0.456901328 | 4.99E-24 |
| RP11-221N13.3 | TM4SF1   | 0.314398941 | 1.58E-11 |
| RP11-221N13.3 | SEL1L3   | 0.350747556 | 3.74E-14 |
| RP11-221N13.3 | VASN     | 0.609390651 | 5.57E-46 |
| RP11-221N13.3 | NPTXR    | 0.643269303 | 1.23E-52 |
| RP11-221N13.3 | PDE4C    | 0.450021772 | 2.82E-23 |
| RP11-221N13.3 | CDC42EP1 | 0.516459134 | 2.67E-31 |
| RP11-221N13.3 | ENDOD1   | 0.642741099 | 1.59E-52 |
| RP11-221N13.3 | RYR1     | 0.542819677 | 5.25E-35 |
| RP11-221N13.3 | IL1RAP   | 0.563859745 | 3.30E-38 |
| RP11-221N13.3 | SLC35F2  | 0.592645522 | 5.61E-43 |
| RP11-221N13.3 | ISYNA1   | 0.523227064 | 3.20E-32 |
| RP11-221N13.3 | HLA-G    | 0.3681753   | 1.54E-15 |
| RP11-221N13.3 | CDKN2B   | 0.413476854 | 1.47E-19 |
| RP11-221N13.3 | ALDH1A3  | 0.264781407 | 1.77E-08 |
| RP11-221N13.3 | CLIP3    | 0.420514701 | 3.07E-20 |
| RP11-221N13.3 | ULBP2    | 0.443075269 | 1.56E-22 |
| RP11-221N13.3 | ETHE1    | 0.562173862 | 6.08E-38 |
| RP11-221N13.3 | XPR1     | 0.449236275 | 3.43E-23 |
| RP11-221N13.3 | SPTBN2   | 0.569324186 | 4.46E-39 |
| RP11-221N13.3 | IVL      | 0.503235927 | 1.47E-29 |
| RP11-221N13.3 | MARCO    | 0.320729869 | 5.84E-12 |
| RP11-221N13.3 | PLXND1   | 0.311221209 | 2.58E-11 |
| RP11-221N13.3 | EMILIN2  | 0.539503228 | 1.60E-34 |
| RP11-221N13.3 | PLAUR    | 0.383823548 | 7.39E-17 |
| RP11-221N13.3 | CDC42EP5 | 0.464619712 | 6.83E-25 |

|               |          |             |             |
|---------------|----------|-------------|-------------|
| RP11-221N13.3 | TRPC5    | 0.559107251 | 1.83E-37    |
| RP11-221N13.3 | TMEM100  | 0.500199566 | 3.59E-29    |
| RP11-221N13.3 | QSOX1    | 0.494019128 | 2.16E-28    |
| RP11-221N13.3 | ARHGAP23 | 0.422616452 | 1.91E-20    |
| RP11-221N13.3 | MDF1     | 0.225827942 | 1.75E-06    |
| RP11-221N13.3 | FSTL3    | 0.432578284 | 1.91E-21    |
| RP11-221N13.3 | INF2     | 0.552121538 | 2.15E-36    |
| RP11-221N13.3 | TGFBR1   | 0.634758046 | 6.93E-51    |
| RP11-221N13.3 | TGFBI    | 0.332041995 | 9.28E-13    |
| RP11-221N13.3 | ERBB3    | 0.569061077 | 4.91E-39    |
| RP11-221N13.3 | CCL18    | 0.192465721 | 4.93E-05    |
| RP11-221N13.3 | CCL17    | 0.440718793 | 2.75E-22    |
| RP11-221N13.3 | C16orf45 | 0.490846218 | 5.36E-28    |
| RP11-221N13.3 | PRDM1    | 0.398389574 | 3.77E-18    |
| RP11-221N13.3 | TRIM47   | 0.477653749 | 2.11E-26    |
| RP11-221N13.3 | CNFN     | 0.438898857 | 4.27E-22    |
| RP11-221N13.3 | ARMCX3   | 0.609493483 | 5.34E-46    |
| RP11-221N13.3 | RAMP1    | 0.444929656 | 9.90E-23    |
| RP11-221N13.3 | GABRD    | 0.16630446  | 0.000467136 |
| RP11-221N13.3 | COL13A1  | 0.480443697 | 9.84E-27    |
| RP11-221N13.3 | S100A5   | 0.538926515 | 1.94E-34    |
| RP11-221N13.3 | MISP     | 0.284925344 | 1.21E-09    |
| RP11-221N13.3 | HES6     | 0.352376704 | 2.80E-14    |
| RP11-221N13.3 | PSD3     | 0.634816767 | 6.74E-51    |
| RP11-221N13.3 | DOK7     | 0.421308992 | 2.57E-20    |
| RP11-221N13.3 | ZMAT3    | 0.422709072 | 1.87E-20    |
| RP11-221N13.3 | MFAP2    | 0.423295146 | 1.64E-20    |
| RP11-221N13.3 | TMEM79   | 0.571952864 | 1.68E-39    |
| RP11-221N13.3 | SLC1A5   | 0.444487547 | 1.10E-22    |
| RP11-221N13.3 | BBC3     | 0.431587405 | 2.41E-21    |
| RP11-221N13.3 | HLA-DQB2 | 0.376270263 | 3.26E-16    |
| RP11-221N13.3 | C1QL1    | 0.463175378 | 9.95E-25    |
| RP11-221N13.3 | TMEM215  | 0.425617559 | 9.62E-21    |
| RP11-221N13.3 | PNP      | 0.418869383 | 4.45E-20    |
| RP11-221N13.3 | ARNTL    | 0.514144768 | 5.44E-31    |
| RP11-221N13.3 | CLDN2    | 0.593618458 | 3.79E-43    |
| RP11-221N13.3 | MVP      | 0.579627421 | 9.22E-41    |
| RP11-221N13.3 | LGALS1   | 0.447702867 | 5.01E-23    |
| RP11-221N13.3 | BIRC7    | 0.498379006 | 6.11E-29    |
| RP11-221N13.3 | COL8A1   | 0.688137543 | 7.28E-63    |
| RP11-221N13.3 | PERP     | 0.472040237 | 9.61E-26    |
| RP11-221N13.3 | GJA4     | 0.246757093 | 1.64E-07    |
| RP11-221N13.3 | IGFL2    | 0.462924104 | 1.06E-24    |
| RP11-221N13.3 | DAPK2    | 0.465334999 | 5.67E-25    |
| RP11-221N13.3 | MAMLD1   | 0.594876963 | 2.28E-43    |
| RP11-221N13.3 | ETV5     | 0.497965621 | 6.90E-29    |
| RP11-221N13.3 | RUNX1    | 0.450911095 | 2.26E-23    |
| RP11-221N13.3 | LONRF2   | 0.490999828 | 5.13E-28    |
| RP11-221N13.3 | SPOCK1   | 0.257197627 | 4.61E-08    |
| RP11-221N13.3 | XKRX     | 0.533583771 | 1.14E-33    |
| RP11-221N13.3 | TGFB1    | 0.312252369 | 2.20E-11    |

|               |           |             |          |
|---------------|-----------|-------------|----------|
| RP11-221N13.3 | ERP27     | 0.296911483 | 2.20E-10 |
| RP11-221N13.3 | TNFRSF10C | 0.438764678 | 4.41E-22 |
| RP11-221N13.3 | PALM      | 0.496657877 | 1.01E-28 |
| RP11-221N13.3 | TSC22D1   | 0.574322689 | 6.91E-40 |
| RP11-221N13.3 | TGM2      | 0.308326868 | 4.02E-11 |
| RP11-221N13.3 | UBE2QL1   | 0.512499592 | 9.02E-31 |
| RP11-221N13.3 | ECE1      | 0.567535612 | 8.62E-39 |
| RP11-221N13.3 | COL8A2    | 0.502269404 | 1.95E-29 |
| RP11-221N13.3 | HIST3H2A  | 0.436324502 | 7.89E-22 |
| RP11-221N13.3 | TNFRSF21  | 0.344747394 | 1.07E-13 |
| RP11-221N13.3 | SOX4      | 0.392063186 | 1.40E-17 |
| RP11-221N13.3 | ELF3      | 0.406521557 | 6.71E-19 |
| RP11-221N13.3 | TPD52L1   | 0.580668368 | 6.18E-41 |
| RP11-221N13.3 | INHBB     | 0.459915663 | 2.31E-24 |
| RP11-221N13.3 | HPN       | 0.56429079  | 2.82E-38 |
| RP11-221N13.3 | MMP7      | 0.277001136 | 3.57E-09 |
| RP11-221N13.3 | RAB27A    | 0.671055173 | 9.30E-59 |
| RP11-221N13.3 | IGF2BP2   | 0.676969807 | 3.79E-60 |
| RP11-221N13.3 | ITGB4     | 0.394911288 | 7.77E-18 |
| RP11-221N13.3 | PPP1R1B   | 0.574931457 | 5.49E-40 |
| RP11-221N13.3 | NPDC1     | 0.449610868 | 3.12E-23 |
| RP11-221N13.3 | CCL13     | 0.499689623 | 4.17E-29 |
| RP11-221N13.3 | SPINT1    | 0.62011486  | 5.34E-48 |
| RP11-221N13.3 | HEY2      | 0.568871723 | 5.27E-39 |
| RP11-221N13.3 | CST2      | 0.323833571 | 3.55E-12 |
| RP11-221N13.3 | ADM       | 0.551746093 | 2.45E-36 |
| RP11-221N13.3 | VSTM2L    | 0.285535813 | 1.11E-09 |
| RP11-221N13.3 | FAM84A    | 0.394979795 | 7.66E-18 |
| RP11-221N13.3 | P4HA2     | 0.634729111 | 7.03E-51 |
| RP11-221N13.3 | LPL       | 0.382220924 | 1.02E-16 |
| RP11-221N13.3 | TMEM173   | 0.457928091 | 3.84E-24 |
| RP11-221N13.3 | DHRS3     | 0.586600731 | 6.17E-42 |
| RP11-221N13.3 | SCN1B     | 0.641274639 | 3.20E-52 |
| RP11-221N13.3 | GLT1D1    | 0.499422153 | 4.51E-29 |
| RP11-221N13.3 | PHYHIP    | 0.567510223 | 8.70E-39 |
| RP11-221N13.3 | BHLHE40   | 0.434111692 | 1.33E-21 |
| RP11-221N13.3 | BID       | 0.593080588 | 4.71E-43 |
| RP11-221N13.3 | POSTN     | 0.275468596 | 4.38E-09 |
| RP11-221N13.3 | ITGA3     | 0.634585713 | 7.51E-51 |
| RP11-221N13.3 | RSP04     | 0.51212585  | 1.01E-30 |
| RP11-221N13.3 | ADAMTS9   | 0.484667057 | 3.05E-27 |
| RP11-221N13.3 | ABTB2     | 0.601374833 | 1.61E-44 |
| RP11-221N13.3 | KCNQ3     | 0.536696117 | 4.08E-34 |
| RP11-221N13.3 | ANXA1     | 0.616985778 | 2.11E-47 |
| RP11-221N13.3 | S100A11   | 0.496078754 | 1.19E-28 |
| RP11-221N13.3 | CEACAM6   | 0.383762914 | 7.48E-17 |
| RP11-221N13.3 | IER5L     | 0.538910771 | 1.95E-34 |
| RP11-221N13.3 | KRT80     | 0.414664745 | 1.13E-19 |
| RP11-221N13.3 | CDH6      | 0.413046377 | 1.62E-19 |
| RP11-221N13.3 | UNC5B     | 0.449885466 | 2.92E-23 |
| RP11-221N13.3 | PLEKHN1   | 0.576913923 | 2.59E-40 |

|               |            |             |             |
|---------------|------------|-------------|-------------|
| RP11-221N13.3 | SYTL1      | 0.411605022 | 2.22E-19    |
| RP11-221N13.3 | TMEM163    | 0.376199061 | 3.31E-16    |
| RP11-221N13.3 | C4orf48    | 0.344186993 | 1.18E-13    |
| RP11-221N13.3 | B3GNT7     | 0.589221041 | 2.20E-42    |
| RP11-221N13.3 | BAIAP3     | 0.536818523 | 3.92E-34    |
| RP11-221N13.3 | PHLDA2     | 0.595787845 | 1.58E-43    |
| RP11-221N13.3 | GAP43      | 0.575094646 | 5.17E-40    |
| RP11-221N13.3 | S100A1     | 0.428246418 | 5.25E-21    |
| RP11-221N13.3 | PTPRE      | 0.63491506  | 6.44E-51    |
| RP11-221N13.3 | CCND1      | 0.483621004 | 4.09E-27    |
| RP11-221N13.3 | ST6GALNAC5 | 0.419921691 | 3.51E-20    |
| RP11-221N13.3 | KRT17      | 0.222862257 | 2.41E-06    |
| RP11-221N13.3 | HPCAL4     | 0.631427412 | 3.24E-50    |
| RP11-221N13.3 | GABBR2     | 0.552434006 | 1.93E-36    |
| RP11-221N13.3 | DIRAS3     | 0.642687343 | 1.63E-52    |
| RP11-221N13.3 | SERINC2    | 0.462551718 | 1.17E-24    |
| RP11-221N13.3 | PTCHD4     | 0.359173994 | 8.19E-15    |
| RP11-221N13.3 | EPS8       | 0.61601504  | 3.22E-47    |
| RP11-221N13.3 | LY6E       | 0.562701215 | 5.02E-38    |
| RP11-221N13.3 | UPP1       | 0.531240612 | 2.44E-33    |
| RP11-221N13.3 | AHNAK2     | 0.53333201  | 1.24E-33    |
| RP11-221N13.3 | PLXNC1     | 0.614858496 | 5.33E-47    |
| RP11-221N13.3 | TNC        | 0.419130648 | 4.19E-20    |
| RP11-221N13.3 | DUSP4      | 0.505683864 | 7.07E-30    |
| RP11-221N13.3 | NRCAM      | 0.551689075 | 2.50E-36    |
| RP11-221N13.3 | NRP2       | 0.579233395 | 1.07E-40    |
| RP11-221N13.3 | CTSC       | 0.634069566 | 9.55E-51    |
| RP11-221N13.3 | AMIGO2     | 0.499890501 | 3.93E-29    |
| RP11-221N13.3 | NAB2       | 0.618646556 | 1.02E-47    |
| RP11-221N13.3 | TBC1D2     | 0.525678162 | 1.47E-32    |
| RP11-221N13.3 | PHLDA3     | 0.426328346 | 8.17E-21    |
| RP11-221N13.3 | PTP4A3     | 0.455452313 | 7.21E-24    |
| RP11-221N13.3 | CRABP2     | 0.486323155 | 1.92E-27    |
| RP11-221N13.3 | GOS2       | 0.532953445 | 1.40E-33    |
| RP11-221N13.3 | S100A6     | 0.561989047 | 6.50E-38    |
| RP11-221N13.3 | FOXQ1      | 0.458131345 | 3.65E-24    |
| RP11-221N13.3 | LRG1       | 0.530748152 | 2.87E-33    |
| RP11-221N13.3 | LAMP5      | 0.362699938 | 4.28E-15    |
| RP11-221N13.3 | ALDH3B1    | 0.472731554 | 7.99E-26    |
| RP11-221N13.3 | CDH2       | 0.137124892 | 0.003995676 |
| RP11-221N13.3 | SCG5       | 0.461234045 | 1.64E-24    |
| RP11-221N13.3 | ZCCHC16    | 0.607979487 | 1.01E-45    |
| RP11-221N13.3 | GRB7       | 0.534792371 | 7.65E-34    |
| RP11-221N13.3 | TIAM1      | 0.441259462 | 2.42E-22    |
| RP11-221N13.3 | FXD5       | 0.464370077 | 7.29E-25    |
| RP11-221N13.3 | CLDN9      | 0.454622137 | 8.90E-24    |
| RP11-221N13.3 | FAM43A     | 0.610500815 | 3.47E-46    |
| RP11-221N13.3 | CHST2      | 0.465441236 | 5.51E-25    |
| RP11-221N13.3 | HMGA2      | 0.679245735 | 1.08E-60    |
| RP11-221N13.3 | GALNT7     | 0.771732307 | 6.14E-88    |
| RP11-221N13.3 | CBLN1      | 0.471589902 | 1.08E-25    |

|               |         |             |          |
|---------------|---------|-------------|----------|
| RP11-221N13.3 | STRA6   | 0.496893328 | 9.42E-29 |
| RP11-221N13.3 | MUC21   | 0.509025234 | 2.59E-30 |
| RP11-221N13.3 | PRR36   | 0.578085361 | 1.66E-40 |
| RP11-221N13.3 | NFE2L3  | 0.448106253 | 4.53E-23 |
| RP11-221N13.3 | NR1D1   | 0.360046863 | 6.98E-15 |
| RP11-221N13.3 | MUC1    | 0.422574185 | 1.93E-20 |
| RP11-221N13.3 | NAT8L   | 0.502652082 | 1.74E-29 |
| RP11-221N13.3 | APOC1   | 0.261653459 | 2.64E-08 |
| RP11-221N13.3 | EVA1A   | 0.498483613 | 5.93E-29 |
| RP11-221N13.3 | ENTPD1  | 0.352530031 | 2.72E-14 |
| RP11-221N13.3 | COL1A1  | 0.35369693  | 2.21E-14 |
| RP11-221N13.3 | FNDC4   | 0.40174276  | 1.86E-18 |
| RP11-221N13.3 | FRMD3   | 0.512979571 | 7.78E-31 |
| RP11-221N13.3 | SHROOM4 | 0.626133886 | 3.63E-49 |
| RP11-221N13.3 | NELL2   | 0.49431798  | 1.98E-28 |
| RP11-221N13.3 | EPHB3   | 0.512157196 | 1.00E-30 |
| RP11-221N13.3 | TMC6    | 0.618734779 | 9.80E-48 |
| RP11-221N13.3 | NOD1    | 0.623006222 | 1.48E-48 |
| RP11-221N13.3 | GGCT    | 0.713062546 | 2.15E-69 |
| RP11-221N13.3 | ICAM1   | 0.522195336 | 4.44E-32 |
| RP11-221N13.3 | PRSS23  | 0.542905064 | 5.10E-35 |
| RP11-221N13.3 | CFI     | 0.522706094 | 3.78E-32 |
| RP11-221N13.3 | CD55    | 0.444547828 | 1.09E-22 |
| RP11-221N13.3 | RASD2   | 0.475485759 | 3.80E-26 |
| RP11-221N13.3 | KLK11   | 0.419896943 | 3.53E-20 |
| RP11-221N13.3 | ICAM5   | 0.537174961 | 3.48E-34 |
| RP11-221N13.3 | ADORA1  | 0.675821631 | 7.09E-60 |
| RP11-221N13.3 | ITGA2   | 0.499689801 | 4.17E-29 |
| RP11-221N13.3 | ABCC3   | 0.525560011 | 1.52E-32 |
| RP11-221N13.3 | MFGE8   | 0.630289023 | 5.47E-50 |
| RP11-221N13.3 | STK32A  | 0.568423942 | 6.22E-39 |
| RP11-221N13.3 | CYSLTR2 | 0.429931875 | 3.55E-21 |
| RP11-221N13.3 | LAD1    | 0.599178192 | 3.97E-44 |
| RP11-221N13.3 | MGAT3   | 0.336562364 | 4.35E-13 |
| RP11-221N13.3 | IGFBP6  | 0.616580831 | 2.52E-47 |
| RP11-221N13.3 | CYP2S1  | 0.418680597 | 4.64E-20 |
| RP11-221N13.3 | KCNJ2   | 0.634607414 | 7.44E-51 |
| RP11-221N13.3 | FAM20A  | 0.544610946 | 2.86E-35 |
| RP11-221N13.3 | TGFA    | 0.713950309 | 1.22E-69 |
| RP11-221N13.3 | MXRA8   | 0.546691422 | 1.41E-35 |
| RP11-221N13.3 | C8orf4  | 0.366848124 | 1.97E-15 |
| RP11-221N13.3 | CLDN10  | 0.608360933 | 8.63E-46 |
| RP11-221N13.3 | PDE5A   | 0.634739465 | 6.99E-51 |
| RP11-221N13.3 | APOE    | 0.320268045 | 6.28E-12 |
| RP11-221N13.3 | SPOCK2  | 0.275888152 | 4.14E-09 |
| RP11-221N13.3 | TENM1   | 0.594582508 | 2.57E-43 |
| RP11-221N13.3 | SLIT1   | 0.51438263  | 5.06E-31 |
| RP11-221N13.3 | CXCL14  | 0.237064044 | 5.04E-07 |
| RP11-221N13.3 | ECM1    | 0.409286968 | 3.69E-19 |
| RP11-221N13.3 | DUSP5   | 0.468131898 | 2.72E-25 |
| RP11-221N13.3 | SEZ6L2  | 0.45845899  | 3.36E-24 |

|               |           |             |          |
|---------------|-----------|-------------|----------|
| RP11-221N13.3 | THRSP     | 0.426044387 | 8.72E-21 |
| RP11-221N13.3 | C19orf33  | 0.399580444 | 2.94E-18 |
| RP11-221N13.3 | MPZL2     | 0.600124675 | 2.69E-44 |
| RP11-221N13.3 | CTSH      | 0.672503904 | 4.27E-59 |
| RP11-221N13.3 | CYP1B1    | 0.675055139 | 1.08E-59 |
| RP11-221N13.3 | ALOX5     | 0.429346653 | 4.07E-21 |
| RP11-221N13.3 | SYTL5     | 0.558609783 | 2.18E-37 |
| RP11-221N13.3 | TNFRSF12A | 0.535368516 | 6.33E-34 |
| RP11-221N13.3 | DUSP6     | 0.52802898  | 6.91E-33 |
| RP11-221N13.3 | ALOX15B   | 0.485054416 | 2.74E-27 |
| RP11-221N13.3 | SDC4      | 0.652053172 | 1.68E-54 |
| RP11-221N13.3 | MDK       | 0.491440376 | 4.52E-28 |
| RP11-221N13.3 | KRT19     | 0.440640482 | 2.81E-22 |
| RP11-221N13.3 | MET       | 0.647346712 | 1.71E-53 |
| RP11-221N13.3 | TESC      | 0.50906953  | 2.56E-30 |
| RP11-221N13.3 | CXCL17    | 0.634739488 | 6.99E-51 |
| RP11-221N13.3 | NPC2      | 0.692870668 | 4.72E-64 |
| RP11-221N13.3 | COMP      | 0.387500124 | 3.53E-17 |
| RP11-221N13.3 | TUSC3     | 0.563513377 | 3.74E-38 |
| RP11-221N13.3 | TMPRSS4   | 0.48686001  | 1.65E-27 |
| RP11-221N13.3 | LGALS3    | 0.61768135  | 1.56E-47 |
| RP11-221N13.3 | CRLF1     | 0.302840442 | 9.18E-11 |
| RP11-221N13.3 | CTXN1     | 0.451455752 | 1.97E-23 |
| RP11-221N13.3 | PCSK1N    | 0.265560096 | 1.60E-08 |
| RP11-221N13.3 | NMU       | 0.392899233 | 1.18E-17 |
| RP11-221N13.3 | GALE      | 0.680184417 | 6.44E-61 |
| RP11-221N13.3 | PCSK2     | 0.312864399 | 2.01E-11 |
| RP11-221N13.3 | GJB3      | 0.589590387 | 1.90E-42 |
| RP11-221N13.3 | SLPI      | 0.355096584 | 1.72E-14 |
| RP11-221N13.3 | AGR2      | 0.217939779 | 4.05E-06 |
| RP11-221N13.3 | MRC2      | 0.505534083 | 7.40E-30 |
| RP11-221N13.3 | GOLT1A    | 0.672061654 | 5.42E-59 |
| RP11-221N13.3 | SLC27A6   | 0.450622045 | 2.43E-23 |
| RP11-221N13.3 | KCNN4     | 0.590868203 | 1.14E-42 |
| RP11-221N13.3 | ETV4      | 0.424531206 | 1.23E-20 |
| RP11-221N13.3 | SYT12     | 0.691747171 | 9.08E-64 |
| RP11-221N13.3 | PVRL4     | 0.620551437 | 4.40E-48 |
| RP11-221N13.3 | PLCD3     | 0.550082053 | 4.37E-36 |
| RP11-221N13.3 | PLAU      | 0.56510508  | 2.10E-38 |
| RP11-221N13.3 | LRRK2     | 0.540129583 | 1.30E-34 |
| RP11-221N13.3 | SFN       | 0.44857985  | 4.03E-23 |
| RP11-221N13.3 | LPAR5     | 0.671949886 | 5.76E-59 |
| RP11-221N13.3 | NGEF      | 0.536000403 | 5.13E-34 |
| RP11-221N13.3 | DTX4      | 0.597245228 | 8.74E-44 |
| RP11-221N13.3 | CST6      | 0.529948896 | 3.72E-33 |
| RP11-221N13.3 | QPCT      | 0.660571237 | 2.27E-56 |
| RP11-221N13.3 | TIMP1     | 0.658874007 | 5.40E-56 |
| RP11-221N13.3 | CAMK2N1   | 0.68605267  | 2.39E-62 |
| RP11-221N13.3 | KLHDC8A   | 0.414976363 | 1.06E-19 |
| RP11-221N13.3 | PDLIM4    | 0.662716817 | 7.49E-57 |
| RP11-221N13.3 | SCEL      | 0.481642651 | 7.07E-27 |



|               |          |              |          |
|---------------|----------|--------------|----------|
| RP11-221N13.3 | LCN2     | 0.497205938  | 8.60E-29 |
| RP11-221N13.3 | PROS1    | 0.679384878  | 1.00E-60 |
| RP11-221N13.3 | GABRB2   | 0.694352589  | 1.98E-64 |
| RP11-221N13.3 | TMPRSS6  | 0.525930207  | 1.35E-32 |
| RP11-221N13.3 | KLK7     | 0.500892728  | 2.93E-29 |
| RP11-221N13.3 | PDZK1IP1 | 0.494364219  | 1.96E-28 |
| RP11-221N13.3 | CDH3     | 0.543768146  | 3.81E-35 |
| RP11-221N13.3 | LRP4     | 0.570289675  | 3.12E-39 |
| RP11-221N13.3 | IGSF1    | 0.335149944  | 5.52E-13 |
| RP11-221N13.3 | B3GNT3   | 0.480279449  | 1.03E-26 |
| RP11-221N13.3 | CLDN1    | 0.528345846  | 6.24E-33 |
| RP11-221N13.3 | GDF15    | 0.500430478  | 3.35E-29 |
| RP11-221N13.3 | ARHGAP36 | 0.41885684   | 4.46E-20 |
| RP11-221N13.3 | LAMB3    | 0.476801729  | 2.66E-26 |
| RP11-221N13.3 | KLK10    | 0.586042032  | 7.68E-42 |
| RP11-221N13.3 | DPP4     | 0.591148332  | 1.02E-42 |
| RP11-221N13.3 | METTL7B  | 0.696669508  | 5.05E-65 |
| RP11-221N13.3 | LIPH     | 0.651731484  | 1.97E-54 |
| RP11-221N13.3 | CLDN16   | 0.538370511  | 2.34E-34 |
| RP11-221N13.3 | CHI3L1   | 0.717540931  | 1.22E-70 |
| RP11-221N13.3 | SLC22A31 | 0.591608522  | 8.49E-43 |
| RP11-221N13.3 | TACSTD2  | 0.533240666  | 1.27E-33 |
| RP11-221N13.3 | SFTPBP   | 0.521929107  | 4.82E-32 |
| RP11-221N13.3 | RXRG     | 0.678343505  | 1.78E-60 |
| RP11-221N13.3 | DCSTAMP  | 0.648852558  | 8.16E-54 |
| RP11-221N13.3 | CITED1   | 0.728268544  | 9.91E-74 |
| RP11-221N13.3 | SERPINA1 | 0.700428066  | 5.34E-66 |
| RP11-221N13.3 | PRR15    | 0.56793063   | 7.46E-39 |
| RP11-221N13.3 | SLC34A2  | 0.584224665  | 1.56E-41 |
| RP11-221N13.3 | FN1      | 0.567305267  | 9.38E-39 |
| RP11-221N13.3 | ZCCHC12  | 0.55792341   | 2.79E-37 |
| DOCK9-AS2     | TFF3     | -0.427785894 | 0        |
| DOCK9-AS2     | CCL21    | -0.365949502 | 2.34E-15 |
| DOCK9-AS2     | TPO      | -0.541947197 | 0        |
| DOCK9-AS2     | MT1G     | -0.553779676 | 0        |
| DOCK9-AS2     | DIO1     | -0.544977973 | 0        |
| DOCK9-AS2     | DPT      | -0.381174873 | 1.25E-16 |
| DOCK9-AS2     | CDH16    | -0.522131557 | 0        |
| DOCK9-AS2     | CRABP1   | -0.397464518 | 4.57E-18 |
| DOCK9-AS2     | SLC26A7  | -0.483371157 | 0        |
| DOCK9-AS2     | MT1H     | -0.570266196 | 3.14E-39 |
| DOCK9-AS2     | SLC26A4  | -0.495509011 | 0        |
| DOCK9-AS2     | SLC5A8   | -0.615754053 | 3.61E-47 |
| DOCK9-AS2     | PKHD1L1  | -0.486886053 | 1.64E-27 |
| DOCK9-AS2     | TFCP2L1  | -0.604751686 | 0        |
| DOCK9-AS2     | WSCD2    | -0.528413117 | 6.11E-33 |
| DOCK9-AS2     | IPCEF1   | -0.521015582 | 0        |
| DOCK9-AS2     | SLC5A5   | -0.464813037 | 6.49E-25 |
| DOCK9-AS2     | MT1F     | -0.519233115 | 0        |
| DOCK9-AS2     | FOSB     | -0.256917113 | 5.33E-08 |
| DOCK9-AS2     | SEMA3D   | -0.582126556 | 3.52E-41 |

|           |           |              |             |
|-----------|-----------|--------------|-------------|
| DOCK9-AS2 | BMP8A     | -0.513336945 | 0           |
| DOCK9-AS2 | MATN2     | -0.496698741 | 0           |
| DOCK9-AS2 | PLA2R1    | -0.51403521  | 0           |
| DOCK9-AS2 | COL23A1   | -0.500588908 | 0           |
| DOCK9-AS2 | HGD       | -0.611400443 | 0           |
| DOCK9-AS2 | TCEAL2    | -0.420129384 | 0           |
| DOCK9-AS2 | CHRD1     | -0.37922832  | 1.83E-16    |
| DOCK9-AS2 | TNFRSF11B | -0.544987759 | 0           |
| DOCK9-AS2 | FAM167A   | -0.471532437 | 0           |
| DOCK9-AS2 | KIT       | -0.457469143 | 0           |
| DOCK9-AS2 | SLC4A4    | -0.60577887  | 0           |
| DOCK9-AS2 | SMOC2     | -0.372649262 | 5.77E-16    |
| DOCK9-AS2 | FHL1      | -0.504935648 | 0           |
| DOCK9-AS2 | OTOS      | -0.562596697 | 0           |
| DOCK9-AS2 | IGFBPL1   | -0.581274319 | 4.90E-41    |
| DOCK9-AS2 | HBB       | -0.283787732 | 1.67E-09    |
| DOCK9-AS2 | BEX1      | -0.222979885 | 2.53E-06    |
| DOCK9-AS2 | FABP4     | -0.420078666 | 3.39E-20    |
| DOCK9-AS2 | LMOD1     | -0.478759464 | 0           |
| DOCK9-AS2 | SOD3      | -0.549682852 | 0           |
| DOCK9-AS2 | TMEM171   | -0.547743939 | 0           |
| DOCK9-AS2 | PI16      | -0.312355007 | 2.78E-11    |
| DOCK9-AS2 | ZMAT4     | -0.57363792  | 8.94E-40    |
| DOCK9-AS2 | MFAP4     | -0.27294244  | 7.07E-09    |
| DOCK9-AS2 | CWH43     | -0.584481053 | 1.41E-41    |
| DOCK9-AS2 | SPX       | -0.476913454 | 0           |
| DOCK9-AS2 | APOD      | -0.212629746 | 7.35E-06    |
| DOCK9-AS2 | DPP6      | -0.521426201 | 0           |
| DOCK9-AS2 | MMRN1     | -0.443994332 | 0           |
| DOCK9-AS2 | WDR72     | -0.457091715 | 0           |
| DOCK9-AS2 | MPPED2    | -0.552029264 | 0           |
| DOCK9-AS2 | PAPSS2    | -0.567747087 | 0           |
| DOCK9-AS2 | DCN       | -0.322374382 | 5.91E-12    |
| DOCK9-AS2 | SORBS2    | -0.563308578 | 0           |
| DOCK9-AS2 | EGR2      | -0.128814071 | 0.006914756 |
| DOCK9-AS2 | EDN3      | -0.236287453 | 5.51E-07    |
| DOCK9-AS2 | DIO2      | -0.459252887 | 0           |
| DOCK9-AS2 | ITPR1     | -0.579860404 | 0           |
| DOCK9-AS2 | CFD       | -0.270251931 | 1.00E-08    |
| DOCK9-AS2 | CPXM1     | -0.432263125 | 0           |
| DOCK9-AS2 | ELM01     | -0.598428019 | 0           |
| DOCK9-AS2 | GPC3      | -0.425799125 | 9.23E-21    |
| DOCK9-AS2 | MYOC      | -0.070331203 | 0.14123075  |
| DOCK9-AS2 | DEPTOR    | -0.475023049 | 0           |
| DOCK9-AS2 | DGKI      | -0.483258112 | 0           |
| DOCK9-AS2 | CARTPT    | -0.45568063  | 6.81E-24    |
| DOCK9-AS2 | IYD       | -0.506540536 | 0           |
| DOCK9-AS2 | LYVE1     | -0.361895597 | 6.09E-15    |
| DOCK9-AS2 | CLCNKB    | -0.346926957 | 9.96E-14    |
| DOCK9-AS2 | NCAM1     | -0.709616416 | 0           |
| DOCK9-AS2 | HBA2      | -0.222719614 | 2.60E-06    |

|           |            |              |          |
|-----------|------------|--------------|----------|
| DOCK9-AS2 | GLT8D2     | -0.531807402 | 0        |
| DOCK9-AS2 | OGDHL      | -0.586312149 | 0        |
| DOCK9-AS2 | LIFR       | -0.546117776 | 0        |
| DOCK9-AS2 | CSGALNACT1 | -0.383478527 | 0        |
| DOCK9-AS2 | RAP1GAP    | -0.464728226 | 0        |
| DOCK9-AS2 | COL9A3     | -0.424995674 | 0        |
| DOCK9-AS2 | FBLN1      | -0.359719673 | 9.35E-15 |
| DOCK9-AS2 | EFEMP1     | -0.408172372 | 0        |
| DOCK9-AS2 | AOX1       | -0.578991672 | 1.18E-40 |
| DOCK9-AS2 | GRIN2C     | -0.511706953 | 0        |
| DOCK9-AS2 | C11orf74   | -0.429913593 | 0        |
| DOCK9-AS2 | PPARGC1A   | -0.662067219 | 0        |
| DOCK9-AS2 | ANGPTL1    | -0.354871822 | 2.36E-14 |
| DOCK9-AS2 | SCARA5     | -0.361809386 | 5.04E-15 |
| DOCK9-AS2 | LTF        | -0.502474065 | 0        |
| DOCK9-AS2 | CA4        | -0.261396493 | 2.73E-08 |
| DOCK9-AS2 | TG         | -0.323938562 | 4.61E-12 |
| DOCK9-AS2 | FCGBP      | -0.420873745 | 0        |
| DOCK9-AS2 | PBX4       | -0.338805504 | 4.05E-13 |
| DOCK9-AS2 | CYR61      | -0.267264841 | 1.47E-08 |
| DOCK9-AS2 | FOS        | -0.322158222 | 6.11E-12 |
| DOCK9-AS2 | KHDRBS2    | -0.411048687 | 0        |
| DOCK9-AS2 | MUM1L1     | -0.456760951 | 0        |
| DOCK9-AS2 | RGS16      | -0.546015937 | 0        |
| DOCK9-AS2 | MT1M       | -0.493136359 | 0        |
| DOCK9-AS2 | LRP2       | -0.479079165 | 0        |
| DOCK9-AS2 | MAFB       | -0.567970055 | 0        |
| DOCK9-AS2 | KCNK2      | -0.457172846 | 0        |
| DOCK9-AS2 | TBC1D4     | -0.582146393 | 0        |
| DOCK9-AS2 | MIOX       | -0.420220884 | 3.28E-20 |
| DOCK9-AS2 | TPPP       | -0.514874034 | 0        |
| DOCK9-AS2 | FMOD       | -0.657825296 | 0        |
| DOCK9-AS2 | CITED2     | -0.417762122 | 0        |
| DOCK9-AS2 | RGS8       | -0.502555984 | 1.79E-29 |
| DOCK9-AS2 | ABI3BP     | -0.472462746 | 0        |
| DOCK9-AS2 | ADH1B      | -0.353480109 | 2.30E-14 |
| DOCK9-AS2 | OGN        | -0.378307544 | 2.19E-16 |
| DOCK9-AS2 | NR4A1      | -0.219617635 | 3.60E-06 |
| DOCK9-AS2 | FOXJ1      | -0.331143944 | 1.08E-12 |
| DOCK9-AS2 | ALDH1A1    | -0.404405461 | 0        |
| DOCK9-AS2 | OCA2       | -0.339475774 | 2.66E-13 |
| DOCK9-AS2 | TMEM139    | -0.339281084 | 3.74E-13 |
| DOCK9-AS2 | ARHGAP24   | -0.668804058 | 0        |
| DOCK9-AS2 | SLC25A15   | -0.575177651 | 0        |
| DOCK9-AS2 | DES        | -0.268508266 | 1.10E-08 |
| DOCK9-AS2 | GDF10      | -0.460431046 | 2.02E-24 |
| DOCK9-AS2 | KIAA1324   | -0.555729936 | 0        |
| DOCK9-AS2 | JUN        | -0.329419716 | 1.92E-12 |
| DOCK9-AS2 | C7         | -0.194637564 | 4.17E-05 |
| DOCK9-AS2 | LGI3       | -0.583937087 | 0        |
| DOCK9-AS2 | CDON       | -0.568274012 | 0        |

|           |          |              |            |
|-----------|----------|--------------|------------|
| DOCK9-AS2 | BCL2     | -0.493083029 | 0          |
| DOCK9-AS2 | HLF      | -0.479492053 | 0          |
| DOCK9-AS2 | EGR1     | -0.247303251 | 1.68E-07   |
| DOCK9-AS2 | IP6K3    | -0.523422558 | 0          |
| DOCK9-AS2 | SCUBE3   | -0.437742151 | 0          |
| DOCK9-AS2 | PKNOX2   | -0.336009611 | 6.48E-13   |
| DOCK9-AS2 | SMAD9    | -0.423764102 | 0          |
| DOCK9-AS2 | IQGAP2   | -0.61767163  | 0          |
| DOCK9-AS2 | GNA14    | -0.513809405 | 0          |
| DOCK9-AS2 | LAYN     | -0.404459218 | 0          |
| DOCK9-AS2 | AVPR1A   | -0.504376243 | 0          |
| DOCK9-AS2 | PDLIM3   | -0.588800682 | 0          |
| DOCK9-AS2 | GPM6A    | -0.434156651 | 0          |
| DOCK9-AS2 | SDPR     | -0.265098137 | 1.93E-08   |
| DOCK9-AS2 | CRYAB    | -0.373779988 | 4.33E-16   |
| DOCK9-AS2 | FOXA2    | -0.328616294 | 1.63E-12   |
| DOCK9-AS2 | C8orf88  | -0.444859113 | 0          |
| DOCK9-AS2 | ISM1     | -0.522820602 | 0          |
| DOCK9-AS2 | BMP2     | -0.332693175 | 1.12E-12   |
| DOCK9-AS2 | ID4      | -0.389603196 | 0          |
| DOCK9-AS2 | NUPR1    | -0.528218781 | 0          |
| DOCK9-AS2 | SERTM1   | -0.586412455 | 6.64E-42   |
| DOCK9-AS2 | IRS1     | -0.493293373 | 0          |
| DOCK9-AS2 | FIBIN    | -0.53681014  | 0          |
| DOCK9-AS2 | PODN     | -0.320361571 | 8.10E-12   |
| DOCK9-AS2 | TDRD9    | -0.428174953 | 0          |
| DOCK9-AS2 | EPHA3    | -0.437116508 | 0          |
| DOCK9-AS2 | AIF1L    | -0.291626078 | 5.68E-10   |
| DOCK9-AS2 | EBF4     | -0.483306337 | 0          |
| DOCK9-AS2 | ADM2     | -0.560881036 | 0          |
| DOCK9-AS2 | GSTM3    | -0.493197491 | 0          |
| DOCK9-AS2 | HSD17B6  | -0.157583748 | 0.00093487 |
| DOCK9-AS2 | AGR3     | -0.282793552 | 1.62E-09   |
| DOCK9-AS2 | EPHB1    | -0.512659815 | 0          |
| DOCK9-AS2 | TMOD1    | -0.525617346 | 0          |
| DOCK9-AS2 | WASF3    | -0.546185574 | 0          |
| DOCK9-AS2 | SELV     | -0.479358087 | 1.33E-26   |
| DOCK9-AS2 | ENPP1    | -0.469139219 | 0          |
| DOCK9-AS2 | SYNE1    | -0.548603987 | 7.29E-36   |
| DOCK9-AS2 | PLCH1    | -0.539262787 | 0          |
| DOCK9-AS2 | CCDC146  | -0.460576795 | 0          |
| DOCK9-AS2 | SLC16A2  | -0.510554952 | 0          |
| DOCK9-AS2 | IER2     | -0.29927351  | 1.92E-10   |
| DOCK9-AS2 | KCNAB1   | -0.280577958 | 2.58E-09   |
| DOCK9-AS2 | SYNDIG1  | -0.546957735 | 0          |
| DOCK9-AS2 | C16orf89 | -0.358864679 | 1.10E-14   |
| DOCK9-AS2 | CTGF     | -0.188195037 | 7.48E-05   |
| DOCK9-AS2 | NR4A3    | -0.226243273 | 1.79E-06   |
| DOCK9-AS2 | KIAA1456 | -0.469391831 | 0          |
| DOCK9-AS2 | AQP4     | -0.495731979 | 0          |
| DOCK9-AS2 | RNF150   | -0.522158648 | 0          |

|           |          |              |             |
|-----------|----------|--------------|-------------|
| DOCK9-AS2 | C1S      | -0.330442645 | 1.62E-12    |
| DOCK9-AS2 | PFKFB2   | -0.613004905 | 0           |
| DOCK9-AS2 | PROX1    | -0.520816017 | 0           |
| DOCK9-AS2 | TCF7L1   | -0.483832127 | 0           |
| DOCK9-AS2 | HSPB6    | -0.27422564  | 5.98E-09    |
| DOCK9-AS2 | FHDC1    | -0.413754088 | 0           |
| DOCK9-AS2 | PRR15L   | -0.560634239 | 0           |
| DOCK9-AS2 | SLC1A1   | -0.580779083 | 0           |
| DOCK9-AS2 | BTBD11   | -0.372917334 | 5.40E-16    |
| DOCK9-AS2 | TRIM58   | -0.49395632  | 0           |
| DOCK9-AS2 | LRIG1    | -0.579646655 | 0           |
| DOCK9-AS2 | ROR2     | -0.423603543 | 0           |
| DOCK9-AS2 | GPR125   | -0.524799797 | 0           |
| DOCK9-AS2 | FLRT1    | -0.456733292 | 0           |
| DOCK9-AS2 | PGF      | -0.386988145 | 0           |
| DOCK9-AS2 | DUSP1    | -0.264123291 | 2.18E-08    |
| DOCK9-AS2 | PLA2G7   | -0.318306777 | 1.12E-11    |
| DOCK9-AS2 | PLSCR4   | -0.493863842 | 0           |
| DOCK9-AS2 | FAM46B   | -0.484707404 | 0           |
| DOCK9-AS2 | GLDC     | -0.470481424 | 0           |
| DOCK9-AS2 | ZBTB16   | -0.402139897 | 0           |
| DOCK9-AS2 | OMD      | -0.348132907 | 5.93E-14    |
| DOCK9-AS2 | HSD11B2  | -0.322169285 | 6.10E-12    |
| DOCK9-AS2 | FGL2     | -0.379477444 | 7.28E-17    |
| DOCK9-AS2 | CLCNKA   | -0.474503658 | 4.96E-26    |
| DOCK9-AS2 | GATM     | -0.410781608 | 0           |
| DOCK9-AS2 | TNS3     | -0.49190649  | 0           |
| DOCK9-AS2 | TOB1     | -0.39561468  | 0           |
| DOCK9-AS2 | MARC2    | -0.497417997 | 0           |
| DOCK9-AS2 | LRRC2    | -0.506854847 | 0           |
| DOCK9-AS2 | SORD     | -0.202493922 | 1.99E-05    |
| DOCK9-AS2 | RIMS4    | -0.35387882  | 2.83E-14    |
| DOCK9-AS2 | SLC29A4  | -0.440630097 | 0           |
| DOCK9-AS2 | SLC39A14 | -0.601097961 | 0           |
| DOCK9-AS2 | FAXDC2   | -0.38475265  | 0           |
| DOCK9-AS2 | HSPB8    | -0.455311233 | 0           |
| DOCK9-AS2 | CCL19    | -0.136481055 | 0.004171944 |
| DOCK9-AS2 | KCNIP3   | -0.403002692 | 0           |
| DOCK9-AS2 | CGNL1    | -0.443538326 | 0           |
| DOCK9-AS2 | ATF3     | -0.0833869   | 0.080951369 |
| DOCK9-AS2 | SGCD     | -0.452525126 | 0           |
| DOCK9-AS2 | STARD13  | -0.42804191  | 0           |
| DOCK9-AS2 | LDHD     | -0.456370615 | 0           |
| DOCK9-AS2 | RCAN1    | -0.323696304 | 4.80E-12    |
| DOCK9-AS2 | ID3      | -0.43067228  | 0           |
| DOCK9-AS2 | SYTL3    | -0.47633717  | 0           |
| DOCK9-AS2 | MT1E     | -0.440219053 | 0           |
| DOCK9-AS2 | CAMK1D   | -0.474987447 | 0           |
| DOCK9-AS2 | PRKCQ    | -0.434808109 | 0           |
| DOCK9-AS2 | NUAK2    | -0.468677255 | 0           |
| DOCK9-AS2 | LIPG     | -0.269198932 | 1.15E-08    |

|           |          |              |             |
|-----------|----------|--------------|-------------|
| DOCK9-AS2 | SLC25A25 | -0.371974827 | 6.81E-16    |
| DOCK9-AS2 | PRKX     | -0.220332211 | 3.34E-06    |
| DOCK9-AS2 | SRPX     | -0.307805155 | 5.50E-11    |
| DOCK9-AS2 | FAM189A1 | -0.407109161 | 0           |
| DOCK9-AS2 | PLEKHH1  | -0.366390273 | 2.41E-15    |
| DOCK9-AS2 | WNT11    | -0.411214495 | 0           |
| DOCK9-AS2 | SNAI1    | -0.400382818 | 0           |
| DOCK9-AS2 | FDCSP    | -0.183195488 | 0.00011332  |
| DOCK9-AS2 | MT1X     | -0.399031962 | 0           |
| DOCK9-AS2 | ACACB    | -0.549296062 | 0           |
| DOCK9-AS2 | ARC      | -0.007948127 | 0.868057826 |
| DOCK9-AS2 | KLK4     | -0.465962582 | 4.81E-25    |
| DOCK9-AS2 | ZFPM2    | -0.324672569 | 4.11E-12    |
| DOCK9-AS2 | AKAP12   | -0.306289909 | 6.88E-11    |
| DOCK9-AS2 | GJB6     | -0.315634468 | 1.30E-11    |
| DOCK9-AS2 | ERO1LB   | -0.431141051 | 0           |
| DOCK9-AS2 | DNALI1   | -0.326094912 | 3.27E-12    |
| DOCK9-AS2 | HKDC1    | -0.565013177 | 0           |
| DOCK9-AS2 | ZFP36L2  | -0.388047385 | 0           |
| DOCK9-AS2 | CAPSL    | -0.446834963 | 6.20E-23    |
| DOCK9-AS2 | CYP7B1   | -0.531932786 | 0           |
| DOCK9-AS2 | CPQ      | -0.287645135 | 9.87E-10    |
| DOCK9-AS2 | RPS6KA6  | -0.390126235 | 2.08E-17    |
| DOCK9-AS2 | TLE1     | -0.608996729 | 0           |
| DOCK9-AS2 | TP53INP2 | -0.405306978 | 0           |
| DOCK9-AS2 | KATNAL2  | -0.46961338  | 0           |
| DOCK9-AS2 | SGPP2    | -0.532943659 | 0           |
| DOCK9-AS2 | CTH      | -0.561079466 | 0           |
| DOCK9-AS2 | KIF12    | -0.166898334 | 0.000453007 |
| DOCK9-AS2 | TMEM220  | -0.492833253 | 0           |
| DOCK9-AS2 | CENPJ    | -0.446151108 | 0           |
| DOCK9-AS2 | FAM155B  | -0.286557244 | 1.15E-09    |
| DOCK9-AS2 | WFS1     | -0.478331967 | 0           |
| DOCK9-AS2 | SELENBP1 | -0.347432039 | 9.11E-14    |
| DOCK9-AS2 | SNTA1    | -0.535677996 | 0           |
| DOCK9-AS2 | FRAS1    | -0.356856832 | 1.62E-14    |
| DOCK9-AS2 | FBLN7    | -0.588922946 | 0           |
| DOCK9-AS2 | AGPAT9   | -0.335529634 | 7.02E-13    |
| DOCK9-AS2 | GPR83    | -0.257091006 | 5.22E-08    |
| DOCK9-AS2 | PRTG     | -0.440757751 | 0           |
| DOCK9-AS2 | EGR3     | -0.051924304 | 0.277552099 |
| DOCK9-AS2 | GRAMD2   | -0.401920758 | 0           |
| DOCK9-AS2 | HYOU1    | -0.50782175  | 0           |
| DOCK9-AS2 | FBLN5    | -0.356533302 | 1.72E-14    |
| DOCK9-AS2 | ITM2A    | -0.337143599 | 5.36E-13    |
| DOCK9-AS2 | SRF      | -0.301804452 | 1.33E-10    |
| DOCK9-AS2 | FGFR2    | -0.198635101 | 2.87E-05    |
| DOCK9-AS2 | MT1A     | -0.332892255 | 8.06E-13    |
| DOCK9-AS2 | MAMDC2   | -0.324444637 | 4.26E-12    |
| DOCK9-AS2 | FHL2     | -0.48809873  | 0           |
| DOCK9-AS2 | FTCDNL1  | -0.506302675 | 0           |

|           |          |              |             |
|-----------|----------|--------------|-------------|
| DOCK9-AS2 | PKIA     | -0.103803079 | 0.029699972 |
| DOCK9-AS2 | DNAJB4   | -0.266852095 | 1.55E-08    |
| DOCK9-AS2 | SLC25A33 | -0.50845633  | 0           |
| DOCK9-AS2 | EYA2     | -0.454116397 | 0           |
| DOCK9-AS2 | LPAR1    | -0.497300556 | 0           |
| DOCK9-AS2 | STX11    | -0.493930505 | 0           |
| DOCK9-AS2 | ARHGEF28 | -0.59362045  | 0           |
| DOCK9-AS2 | OR2W3    | -0.420878426 | 0           |
| DOCK9-AS2 | ALDH1B1  | -0.672088462 | 5.34E-59    |
| DOCK9-AS2 | CXCL12   | -0.335318013 | 7.27E-13    |
| DOCK9-AS2 | OLFM2    | -0.365016297 | 3.22E-15    |
| DOCK9-AS2 | TUB      | -0.305061458 | 8.25E-11    |
| DOCK9-AS2 | HTRA3    | -0.284082753 | 1.61E-09    |
| DOCK9-AS2 | CKB      | -0.429789769 | 0           |
| DOCK9-AS2 | RGS2     | -0.279056046 | 3.16E-09    |
| DOCK9-AS2 | SHANK2   | -0.436886448 | 0           |
| DOCK9-AS2 | CNTFR    | -0.466361053 | 4.33E-25    |
| DOCK9-AS2 | CYTH3    | -0.46558861  | 0           |
| DOCK9-AS2 | PLAC9    | -0.199337621 | 2.69E-05    |
| DOCK9-AS2 | WVOX     | -0.411141165 | 0           |
| DOCK9-AS2 | NPR3     | -0.347347504 | 9.24E-14    |
| DOCK9-AS2 | SDC2     | -0.153917258 | 0.001230518 |
| DOCK9-AS2 | KLF15    | -0.366861031 | 2.18E-15    |
| DOCK9-AS2 | TMEM164  | -0.633169606 | 0           |
| DOCK9-AS2 | LONRF3   | -0.186670288 | 8.57E-05    |
| DOCK9-AS2 | GBP1     | -0.298945866 | 2.01E-10    |
| DOCK9-AS2 | ARHGAP6  | -0.428961298 | 0           |
| DOCK9-AS2 | TMEM119  | -0.298043782 | 2.29E-10    |
| DOCK9-AS2 | SH3RF1   | -0.437263309 | 0           |
| DOCK9-AS2 | CRELD2   | -0.383006635 | 4.87E-18    |
| DOCK9-AS2 | PCP4     | -0.082483398 | 0.084305358 |
| DOCK9-AS2 | GCSH     | -0.397178576 | 0           |
| DOCK9-AS2 | IMPA2    | -0.317715883 | 1.22E-11    |
| DOCK9-AS2 | C1R      | -0.290435922 | 6.70E-10    |
| DOCK9-AS2 | SUCNR1   | -0.340896609 | 2.84E-13    |
| DOCK9-AS2 | SFRP1    | -0.48141891  | 0           |
| DOCK9-AS2 | UGT8     | -0.600778544 | 0           |
| DOCK9-AS2 | TLE4     | -0.298763606 | 2.06E-10    |
| DOCK9-AS2 | ANTXR1   | -0.527290599 | 0           |
| DOCK9-AS2 | GPX3     | -0.396054233 | 0           |
| DOCK9-AS2 | DPY19L2  | -0.432854018 | 0           |
| DOCK9-AS2 | FAM46C   | -0.491671465 | 0           |
| DOCK9-AS2 | IL33     | -0.340993922 | 2.05E-13    |
| DOCK9-AS2 | PEG3     | -0.423622832 | 0           |
| DOCK9-AS2 | FAHD2A   | -0.424792847 | 0           |
| DOCK9-AS2 | PTGDS    | -0.101570846 | 0.033409314 |
| DOCK9-AS2 | CHCHD10  | -0.463006039 | 0           |
| DOCK9-AS2 | CD36     | -0.407340355 | 0           |
| DOCK9-AS2 | ANKRD37  | -0.270144277 | 1.02E-08    |
| DOCK9-AS2 | TSPAN33  | -0.523383979 | 0           |
| DOCK9-AS2 | PRDM16   | -0.280260243 | 2.69E-09    |

|           |          |              |             |
|-----------|----------|--------------|-------------|
| DOCK9-AS2 | UST      | -0.312905335 | 2.55E-11    |
| DOCK9-AS2 | NEXN     | -0.503625924 | 0           |
| DOCK9-AS2 | NUPR1L   | -0.14692864  | 0.002025369 |
| DOCK9-AS2 | SLC24A3  | -0.71302306  | 0           |
| DOCK9-AS2 | MARC1    | -0.380572001 | 4.45E-17    |
| DOCK9-AS2 | MYH11    | -0.245759353 | 2.02E-07    |
| DOCK9-AS2 | APOA1    | -0.34312233  | 1.42E-13    |
| DOCK9-AS2 | TMEM178B | -0.41587271  | 0           |
| DOCK9-AS2 | CAPN6    | -0.277380295 | 3.39E-09    |
| DOCK9-AS2 | PPM1L    | -0.597499695 | 0           |
| DOCK9-AS2 | FZD8     | -0.508890777 | 0           |
| DOCK9-AS2 | RCAN2    | -0.528917754 | 0           |
| DOCK9-AS2 | COPZ2    | -0.564602275 | 0           |
| DOCK9-AS2 | GAS1     | -0.480262087 | 0           |
| DOCK9-AS2 | DACT1    | -0.43716147  | 0           |
| DOCK9-AS2 | WBSCR17  | -0.284758891 | 1.47E-09    |
| DOCK9-AS2 | NCS1     | -0.301969409 | 1.30E-10    |
| DOCK9-AS2 | SPIRE2   | -0.326326248 | 3.15E-12    |
| DOCK9-AS2 | C15orf52 | -0.634036373 | 0           |
| DOCK9-AS2 | SPAG5    | -0.481765702 | 0           |
| DOCK9-AS2 | ARL4D    | -0.521888164 | 0           |
| DOCK9-AS2 | FAM189A2 | -0.123906507 | 0.009393209 |
| DOCK9-AS2 | MAP1LC3A | -0.35806032  | 1.29E-14    |
| DOCK9-AS2 | KLF6     | -0.077386622 | 0.105379437 |
| DOCK9-AS2 | ADD3     | -0.31353112  | 2.32E-11    |
| DOCK9-AS2 | TSPAN7   | -0.226179305 | 1.80E-06    |
| DOCK9-AS2 | KLF9     | -0.307154123 | 6.06E-11    |
| DOCK9-AS2 | KCNQ1    | -0.457119657 | 0           |
| DOCK9-AS2 | MAN1A1   | -0.392021945 | 0           |
| DOCK9-AS2 | MLF1     | -0.208003018 | 1.16E-05    |
| DOCK9-AS2 | RARB     | -0.47769214  | 0           |
| DOCK9-AS2 | CDC42EP2 | -0.352473356 | 3.67E-14    |
| DOCK9-AS2 | FAM3B    | -0.237422025 | 5.24E-07    |
| DOCK9-AS2 | GADD45B  | -0.256130201 | 5.87E-08    |
| DOCK9-AS2 | TMEM47   | -0.405975031 | 0           |
| DOCK9-AS2 | SDF2L1   | -0.29668399  | 2.78E-10    |
| DOCK9-AS2 | CCDC85A  | -0.335074053 | 7.58E-13    |
| DOCK9-AS2 | CRYBG3   | -0.379273624 | 7.91E-17    |
| DOCK9-AS2 | FBLN2    | -0.244511612 | 2.33E-07    |
| DOCK9-AS2 | PEBP4    | -0.335260143 | 7.34E-13    |
| DOCK9-AS2 | CDADC1   | -0.415100974 | 0           |
| DOCK9-AS2 | FAM63A   | -0.474253298 | 0           |
| DOCK9-AS2 | GLUL     | -0.411576747 | 0           |
| DOCK9-AS2 | FREM2    | -0.561836876 | 0           |
| DOCK9-AS2 | ACKR3    | -0.358555616 | 1.17E-14    |
| DOCK9-AS2 | DENND6A  | -0.499100327 | 0           |
| DOCK9-AS2 | CLDN8    | -0.311829642 | 3.01E-11    |
| DOCK9-AS2 | UTS2R    | -0.110423548 | 0.020661435 |
| DOCK9-AS2 | SCNN1B   | -0.220568512 | 3.26E-06    |
| DOCK9-AS2 | TTC30A   | -0.553801802 | 0           |
| DOCK9-AS2 | CORO2B   | -0.403458698 | 0           |



|           |          |              |             |
|-----------|----------|--------------|-------------|
| DOCK9-AS2 | TC2N     | -0.573259304 | 0           |
| DOCK9-AS2 | ALDH2    | -0.671214154 | 0           |
| DOCK9-AS2 | GPR183   | -0.187265721 | 8.13E-05    |
| DOCK9-AS2 | C4orf47  | -0.29911139  | 1.96E-10    |
| DOCK9-AS2 | SLC25A42 | -0.318097    | 1.15E-11    |
| DOCK9-AS2 | LGMN     | -0.547496575 | 0           |
| DOCK9-AS2 | ACSF2    | -0.540967811 | 0           |
| DOCK9-AS2 | KIAA1467 | -0.548431139 | 0           |
| DOCK9-AS2 | PRKG1    | -0.467802262 | 0           |
| DOCK9-AS2 | GNAI1    | -0.533936803 | 0           |
| DOCK9-AS2 | ABCC4    | -0.507619774 | 0           |
| DOCK9-AS2 | PRPS1    | -0.565653429 | 0           |
| DOCK9-AS2 | TSPAN5   | -0.420275192 | 0           |
| DOCK9-AS2 | CR2      | -0.296525174 | 2.32E-10    |
| DOCK9-AS2 | CCDC170  | -0.444495443 | 0           |
| DOCK9-AS2 | RRAD     | -0.176927354 | 0.000198942 |
| DOCK9-AS2 | SCGB2A1  | -0.439527739 | 0           |
| DOCK9-AS2 | SESN3    | -0.363019372 | 4.85E-15    |
| DOCK9-AS2 | SGK223   | -0.265338551 | 1.87E-08    |
| DOCK9-AS2 | NDRG2    | -0.526726087 | 0           |
| DOCK9-AS2 | C3orf52  | -0.434424865 | 0           |
| DOCK9-AS2 | FLRT3    | 0.287051972  | 1.07E-09    |
| DOCK9-AS2 | MST1R    | 0.497554444  | 0           |
| DOCK9-AS2 | SDC1     | 0.046534352  | 0.330542151 |
| DOCK9-AS2 | ST8SIA4  | 0.2224314    | 2.68E-06    |
| DOCK9-AS2 | UBTD1    | 0.575410122  | 0           |
| DOCK9-AS2 | EPHA2    | 0.434739318  | 0           |
| DOCK9-AS2 | TMEM130  | 0.54018558   | 0           |
| DOCK9-AS2 | SPINK2   | 0.271780935  | 8.22E-09    |
| DOCK9-AS2 | MMP16    | 0.416166596  | 0           |
| DOCK9-AS2 | SIGLEC15 | 0.560910396  | 0           |
| DOCK9-AS2 | RIN1     | 0.653742798  | 0           |
| DOCK9-AS2 | IL1RN    | 0.210910963  | 8.73E-06    |
| DOCK9-AS2 | FCER1G   | 0.123392489  | 0.009693846 |
| DOCK9-AS2 | CD276    | 0.54331323   | 0           |
| DOCK9-AS2 | CTSB     | 0.403269488  | 0           |
| DOCK9-AS2 | FAM171A2 | 0.489430864  | 0           |
| DOCK9-AS2 | ASPHD1   | 0.498609996  | 0           |
| DOCK9-AS2 | C15orf48 | 0.123441565  | 0.009664778 |
| DOCK9-AS2 | DYSF     | 0.314518874  | 2.00E-11    |
| DOCK9-AS2 | PDZRN4   | 0.414613196  | 0           |
| DOCK9-AS2 | EFHD2    | 0.421783772  | 0           |
| DOCK9-AS2 | ASF1B    | 0.227734407  | 1.52E-06    |
| DOCK9-AS2 | AQP1     | 0.281882009  | 2.16E-09    |
| DOCK9-AS2 | ARRDC2   | 0.669129716  | 0           |
| DOCK9-AS2 | PRSS1    | 0.502226476  | 1.98E-29    |
| DOCK9-AS2 | MAPK13   | 0.379104554  | 8.45E-17    |
| DOCK9-AS2 | CST5     | 0.477406438  | 2.26E-26    |
| DOCK9-AS2 | AHR      | 0.31900887   | 1.00E-11    |
| DOCK9-AS2 | BAX      | 0.369228151  | 1.29E-15    |
| DOCK9-AS2 | C1orf115 | 0.590235648  | 0           |

|           |          |             |             |
|-----------|----------|-------------|-------------|
| DOCK9-AS2 | PLK3     | 0.4497298   | 0           |
| DOCK9-AS2 | JAG2     | 0.419991376 | 0           |
| DOCK9-AS2 | RAD23B   | 0.610814088 | 0           |
| DOCK9-AS2 | CA12     | 0.015982633 | 0.738325966 |
| DOCK9-AS2 | ADTRP    | 0.607697785 | 0           |
| DOCK9-AS2 | UCP2     | 0.633740359 | 0           |
| DOCK9-AS2 | IGFBP2   | 0.396861853 | 0           |
| DOCK9-AS2 | LOXL2    | 0.217325689 | 4.56E-06    |
| DOCK9-AS2 | GPX1     | 0.36155618  | 6.51E-15    |
| DOCK9-AS2 | P3H3     | 0.528883288 | 0           |
| DOCK9-AS2 | C2orf81  | 0.691210353 | 0           |
| DOCK9-AS2 | CDT1     | 0.397188788 | 0           |
| DOCK9-AS2 | SNX25    | 0.461839287 | 0           |
| DOCK9-AS2 | MTHFD1L  | 0.464714042 | 0           |
| DOCK9-AS2 | CDC42BPG | 0.512926558 | 7.91E-31    |
| DOCK9-AS2 | MSN      | 0.49511442  | 0           |
| DOCK9-AS2 | SIGLEC6  | 0.538674448 | 2.11E-34    |
| DOCK9-AS2 | F2R      | 0.123994729 | 0.009342452 |
| DOCK9-AS2 | TMEM184A | 0.470452772 | 0           |
| DOCK9-AS2 | CKS2     | 0.226693748 | 1.70E-06    |
| DOCK9-AS2 | TAX1BP3  | 0.501559641 | 0           |
| DOCK9-AS2 | PMEPA1   | 0.376065268 | 2.31E-16    |
| DOCK9-AS2 | CXCL16   | 0.325160631 | 3.80E-12    |
| DOCK9-AS2 | FAXC     | 0.535506373 | 0           |
| DOCK9-AS2 | VTCN1    | 0.288830447 | 6.99E-10    |
| DOCK9-AS2 | SH2D4A   | 0.478599472 | 0           |
| DOCK9-AS2 | RNF24    | 0.450472885 | 0           |
| DOCK9-AS2 | LY6G6C   | 0.548158156 | 8.50E-36    |
| DOCK9-AS2 | NID1     | 0.211990344 | 7.84E-06    |
| DOCK9-AS2 | STAC     | 0.428207859 | 0           |
| DOCK9-AS2 | RAB34    | 0.782701402 | 0           |
| DOCK9-AS2 | HES4     | 0.410956067 | 0           |
| DOCK9-AS2 | EPHA10   | 0.609786478 | 0           |
| DOCK9-AS2 | ENTPD2   | 0.682546657 | 0           |
| DOCK9-AS2 | DDB2     | 0.461691209 | 0           |
| DOCK9-AS2 | NKAIN4   | 0.32167626  | 6.59E-12    |
| DOCK9-AS2 | TRIM29   | 0.486030319 | 0           |
| DOCK9-AS2 | ADCY8    | 0.503994192 | 1.17E-29    |
| DOCK9-AS2 | SFTA2    | 0.277593563 | 3.84E-09    |
| DOCK9-AS2 | NRIP1    | 0.497359418 | 0           |
| DOCK9-AS2 | VWA1     | 0.349877595 | 5.88E-14    |
| DOCK9-AS2 | APLNR    | 0.209121971 | 1.04E-05    |
| DOCK9-AS2 | REN      | 0.651887322 | 1.82E-54    |
| DOCK9-AS2 | EDIL3    | 0.128445153 | 0.00707831  |
| DOCK9-AS2 | AGRN     | 0.485770332 | 0           |
| DOCK9-AS2 | TREM1    | 0.278726983 | 3.30E-09    |
| DOCK9-AS2 | SRL      | 0.363527291 | 4.38E-15    |
| DOCK9-AS2 | RASGRF1  | 0.690721866 | 0           |
| DOCK9-AS2 | RMI2     | 0.533905883 | 0           |
| DOCK9-AS2 | SAMD1    | 0.53725409  | 0           |
| DOCK9-AS2 | MGAT4B   | 0.589115277 | 0           |

|           |          |             |             |
|-----------|----------|-------------|-------------|
| DOCK9-AS2 | NXN      | 0.47749683  | 0           |
| DOCK9-AS2 | SH3BGRL3 | 0.372251977 | 6.36E-16    |
| DOCK9-AS2 | CA11     | 0.584036656 | 0           |
| DOCK9-AS2 | PLD3     | 0.472991941 | 0           |
| DOCK9-AS2 | LURAP1L  | 0.183303358 | 0.000115181 |
| DOCK9-AS2 | CARNS1   | 0.570682549 | 0           |
| DOCK9-AS2 | PDLIM7   | 0.49711248  | 0           |
| DOCK9-AS2 | BCL2L1   | 0.425792515 | 0           |
| DOCK9-AS2 | GGT6     | 0.447915136 | 0           |
| DOCK9-AS2 | DPYSL3   | 0.279313622 | 3.05E-09    |
| DOCK9-AS2 | FYN      | 0.575097229 | 0           |
| DOCK9-AS2 | TK1      | 0.178835347 | 0.000169252 |
| DOCK9-AS2 | AK1      | 0.313137664 | 2.47E-11    |
| DOCK9-AS2 | HIGD1B   | 0.367366113 | 1.95E-15    |
| DOCK9-AS2 | TMEM59L  | 0.42677261  | 0           |
| DOCK9-AS2 | MEGF9    | 0.421303937 | 0           |
| DOCK9-AS2 | ZFP36L1  | 0.376303696 | 2.16E-16    |
| DOCK9-AS2 | ADRA1B   | 0.405044579 | 0           |
| DOCK9-AS2 | EPHA4    | 0.428884139 | 0           |
| DOCK9-AS2 | TCERG1L  | 0.567600144 | 0           |
| DOCK9-AS2 | NGFR     | 0.561314064 | 0           |
| DOCK9-AS2 | EBI3     | 0.336671139 | 5.80E-13    |
| DOCK9-AS2 | S100A10  | 0.268612578 | 1.24E-08    |
| DOCK9-AS2 | S100B    | 0.242363631 | 2.99E-07    |
| DOCK9-AS2 | CD44     | 0.393783137 | 0           |
| DOCK9-AS2 | BHLHE41  | 0.617908498 | 0           |
| DOCK9-AS2 | FBXO2    | 0.536144498 | 0           |
| DOCK9-AS2 | SLC30A2  | 0.163098659 | 0.000611582 |
| DOCK9-AS2 | FRMD5    | 0.199335351 | 2.69E-05    |
| DOCK9-AS2 | SAMD11   | 0.500744787 | 0           |
| DOCK9-AS2 | SIPA1L2  | 0.564104001 | 0           |
| DOCK9-AS2 | S100A16  | 0.459324515 | 0           |
| DOCK9-AS2 | PPL      | 0.447300839 | 0           |
| DOCK9-AS2 | ARHGD1B  | 0.281084458 | 2.41E-09    |
| DOCK9-AS2 | CDC42EP3 | 0.251871966 | 9.81E-08    |
| DOCK9-AS2 | RUNX2    | 0.556309625 | 0           |
| DOCK9-AS2 | LAMC2    | 0.272591109 | 7.40E-09    |
| DOCK9-AS2 | BRINP1   | 0.539202507 | 0           |
| DOCK9-AS2 | GPRC5B   | 0.560000085 | 0           |
| DOCK9-AS2 | AQP5     | 0.446285002 | 0           |
| DOCK9-AS2 | PLAG1    | 0.573509363 | 0           |
| DOCK9-AS2 | PTPRU    | 0.474849724 | 0           |
| DOCK9-AS2 | ANGPTL4  | 0.323317315 | 5.09E-12    |
| DOCK9-AS2 | PALM3    | 0.598933952 | 0           |
| DOCK9-AS2 | ACP5     | 0.293667114 | 4.26E-10    |
| DOCK9-AS2 | DLG4     | 0.574714695 | 0           |
| DOCK9-AS2 | ETNK2    | 0.748162074 | 0           |
| DOCK9-AS2 | CD109    | 0.566323894 | 0           |
| DOCK9-AS2 | SNX22    | 0.598050732 | 0           |
| DOCK9-AS2 | TMEM98   | 0.7283592   | 0           |
| DOCK9-AS2 | CTHRC1   | 0.218682361 | 3.96E-06    |

|           |          |             |             |
|-----------|----------|-------------|-------------|
| DOCK9-AS2 | S100A2   | 0.340748815 | 2.91E-13    |
| DOCK9-AS2 | C11orf80 | 0.573279161 | 0           |
| DOCK9-AS2 | SREBF1   | 0.463003628 | 0           |
| DOCK9-AS2 | PRSS22   | 0.546383437 | 0           |
| DOCK9-AS2 | CMTM3    | 0.324810435 | 4.02E-12    |
| DOCK9-AS2 | RDH5     | 0.729681547 | 0           |
| DOCK9-AS2 | MYH10    | 0.348939626 | 6.96E-14    |
| DOCK9-AS2 | EVPL     | 0.523484683 | 0           |
| DOCK9-AS2 | SCD      | 0.290988094 | 6.21E-10    |
| DOCK9-AS2 | CD151    | 0.654124198 | 0           |
| DOCK9-AS2 | S100A4   | 0.405191948 | 0           |
| DOCK9-AS2 | BNIP1    | 0.625501182 | 0           |
| DOCK9-AS2 | MAP3K6   | 0.475663727 | 0           |
| DOCK9-AS2 | MANEAL   | 0.37923859  | 8.02E-17    |
| DOCK9-AS2 | CD207    | 0.326661925 | 2.25E-12    |
| DOCK9-AS2 | CD1A     | 0.31293139  | 1.98E-11    |
| DOCK9-AS2 | C3       | 0.302970211 | 1.12E-10    |
| DOCK9-AS2 | NT5E     | 0.373359015 | 4.82E-16    |
| DOCK9-AS2 | CACNG4   | 0.45983744  | 2.36E-24    |
| DOCK9-AS2 | FHOD1    | 0.599953761 | 0           |
| DOCK9-AS2 | LEMD1    | 0.543319046 | 0           |
| DOCK9-AS2 | ATP11A   | 0.382560416 | 1.02E-17    |
| DOCK9-AS2 | PPAP2C   | 0.472234814 | 0           |
| DOCK9-AS2 | DRAM1    | 0.477133727 | 0           |
| DOCK9-AS2 | CDA      | 0.345392563 | 1.30E-13    |
| DOCK9-AS2 | CCND2    | 0.470289092 | 0           |
| DOCK9-AS2 | LCN6     | 0.637824865 | 1.65E-51    |
| DOCK9-AS2 | CDH4     | 0.477810148 | 0           |
| DOCK9-AS2 | MMP11    | 0.33817901  | 4.50E-13    |
| DOCK9-AS2 | B3GAT1   | 0.5538618   | 0           |
| DOCK9-AS2 | SPP1     | 0.17090268  | 0.000327898 |
| DOCK9-AS2 | HLA-DQB1 | 0.092370155 | 0.05313955  |
| DOCK9-AS2 | SDC3     | 0.606440682 | 0           |
| DOCK9-AS2 | CX3CL1   | 0.276054346 | 4.71E-09    |
| DOCK9-AS2 | SDK1     | 0.553989453 | 0           |
| DOCK9-AS2 | DOCK9    | 0.582502262 | 0           |
| DOCK9-AS2 | CSF2     | 0.484531556 | 3.17E-27    |
| DOCK9-AS2 | GRHL3    | 0.454830122 | 0           |
| DOCK9-AS2 | TMEM92   | 0.486041546 | 2.08E-27    |
| DOCK9-AS2 | BASP1    | 0.570254768 | 0           |
| DOCK9-AS2 | HRH1     | 0.468967029 | 0           |
| DOCK9-AS2 | ESM1     | 0.177522644 | 0.000189192 |
| DOCK9-AS2 | B4GALNT3 | 0.547556714 | 0           |
| DOCK9-AS2 | LMO3     | 0.375674081 | 2.59E-16    |
| DOCK9-AS2 | C9orf16  | 0.424064371 | 0           |
| DOCK9-AS2 | SEMA3F   | 0.506771446 | 0           |
| DOCK9-AS2 | PLA2G12B | 0.487013673 | 1.58E-27    |
| DOCK9-AS2 | KLK6     | 0.654049279 | 6.19E-55    |
| DOCK9-AS2 | ST3GAL5  | 0.604423049 | 0           |
| DOCK9-AS2 | FAM132B  | 0.442325051 | 0           |
| DOCK9-AS2 | CDKN1A   | 0.170633899 | 0.000335164 |

|           |          |             |             |
|-----------|----------|-------------|-------------|
| DOCK9-AS2 | E2F1     | 0.352021888 | 3.99E-14    |
| DOCK9-AS2 | B3GNT8   | 0.466704159 | 0           |
| DOCK9-AS2 | MTMR11   | 0.474582644 | 0           |
| DOCK9-AS2 | MYO1G    | 0.323527092 | 4.93E-12    |
| DOCK9-AS2 | TMSB10   | 0.495556526 | 0           |
| DOCK9-AS2 | UNC5CL   | 0.421622787 | 0           |
| DOCK9-AS2 | ABR      | 0.308004437 | 5.34E-11    |
| DOCK9-AS2 | PLP2     | 0.435599134 | 0           |
| DOCK9-AS2 | SRCIN1   | 0.442322923 | 0           |
| DOCK9-AS2 | PDE9A    | 0.583020252 | 0           |
| DOCK9-AS2 | TREM2    | 0.238473747 | 4.65E-07    |
| DOCK9-AS2 | KDEL3    | 0.27196887  | 8.03E-09    |
| DOCK9-AS2 | PC       | 0.680935388 | 0           |
| DOCK9-AS2 | C2CD4A   | 0.354309154 | 2.62E-14    |
| DOCK9-AS2 | PELI1    | 0.372041632 | 6.70E-16    |
| DOCK9-AS2 | SSX1     | 0.405883404 | 0           |
| DOCK9-AS2 | MROH6    | 0.588235177 | 0           |
| DOCK9-AS2 | ESPN     | 0.67167399  | 0           |
| DOCK9-AS2 | BMP1     | 0.537789525 | 0           |
| DOCK9-AS2 | TM4SF4   | 0.54527565  | 2.28E-35    |
| DOCK9-AS2 | CORO2A   | 0.52001095  | 0           |
| DOCK9-AS2 | CD164L2  | 0.475165966 | 4.15E-26    |
| DOCK9-AS2 | CTSS     | 0.170269093 | 0.000345266 |
| DOCK9-AS2 | CLU      | 0.602602002 | 0           |
| DOCK9-AS2 | TMSB4X   | 0.39655506  | 0           |
| DOCK9-AS2 | WNT10A   | 0.582456044 | 3.10E-41    |
| DOCK9-AS2 | NAPSA    | 0.373366958 | 4.81E-16    |
| DOCK9-AS2 | PLEKHA4  | 0.750449766 | 0           |
| DOCK9-AS2 | SFTPA1   | 0.199706103 | 2.50E-05    |
| DOCK9-AS2 | C1orf116 | 0.518890295 | 0           |
| DOCK9-AS2 | TM4SF1   | 0.394349351 | 0           |
| DOCK9-AS2 | SEL1L3   | 0.519020927 | 0           |
| DOCK9-AS2 | VASN     | 0.623434615 | 0           |
| DOCK9-AS2 | NPTXR    | 0.48016351  | 0           |
| DOCK9-AS2 | PDE4C    | 0.436369168 | 0           |
| DOCK9-AS2 | CDC42EP1 | 0.652467541 | 0           |
| DOCK9-AS2 | ENDOD1   | 0.579551341 | 0           |
| DOCK9-AS2 | RYR1     | 0.672027874 | 0           |
| DOCK9-AS2 | IL1RAP   | 0.536614404 | 0           |
| DOCK9-AS2 | SLC35F2  | 0.634491692 | 7.85E-51    |
| DOCK9-AS2 | ISYNA1   | 0.658922832 | 0           |
| DOCK9-AS2 | HLA-G    | 0.326993308 | 2.83E-12    |
| DOCK9-AS2 | CDKN2B   | 0.293340038 | 4.46E-10    |
| DOCK9-AS2 | ALDH1A3  | 0.266733803 | 1.57E-08    |
| DOCK9-AS2 | CLIP3    | 0.507540913 | 0           |
| DOCK9-AS2 | ULBP2    | 0.442737797 | 0           |
| DOCK9-AS2 | ETHE1    | 0.544054755 | 0           |
| DOCK9-AS2 | XPR1     | 0.360925289 | 7.38E-15    |
| DOCK9-AS2 | SPTBN2   | 0.447755569 | 0           |
| DOCK9-AS2 | IVL      | 0.334856067 | 5.80E-13    |
| DOCK9-AS2 | MARCO    | 0.301629425 | 1.36E-10    |

|           |          |             |             |
|-----------|----------|-------------|-------------|
| DOCK9-AS2 | PLXND1   | 0.458452642 | 0           |
| DOCK9-AS2 | EMILIN2  | 0.389216974 | 0           |
| DOCK9-AS2 | PLAUR    | 0.325337218 | 3.69E-12    |
| DOCK9-AS2 | CDC42EP5 | 0.649897452 | 0           |
| DOCK9-AS2 | TRPC5    | 0.617635763 | 1.59E-47    |
| DOCK9-AS2 | TMEM100  | 0.316237231 | 1.54E-11    |
| DOCK9-AS2 | QSOX1    | 0.638266949 | 0           |
| DOCK9-AS2 | ARHGAP23 | 0.576292207 | 0           |
| DOCK9-AS2 | MDFI     | 0.455199607 | 0           |
| DOCK9-AS2 | FSTL3    | 0.643143593 | 0           |
| DOCK9-AS2 | INF2     | 0.647297577 | 0           |
| DOCK9-AS2 | TGFBR1   | 0.607615661 | 0           |
| DOCK9-AS2 | TGFBI    | 0.201176681 | 2.26E-05    |
| DOCK9-AS2 | ERBB3    | 0.586991549 | 0           |
| DOCK9-AS2 | CCL18    | 0.312130621 | 2.87E-11    |
| DOCK9-AS2 | CCL17    | 0.272927698 | 6.14E-09    |
| DOCK9-AS2 | C16orf45 | 0.680322367 | 0           |
| DOCK9-AS2 | PRDM1    | 0.485744375 | 0           |
| DOCK9-AS2 | TRIM47   | 0.427535126 | 0           |
| DOCK9-AS2 | CNFN     | 0.451753107 | 0           |
| DOCK9-AS2 | ARMCX3   | 0.69670484  | 0           |
| DOCK9-AS2 | RAMP1    | 0.670683825 | 0           |
| DOCK9-AS2 | GABRD    | 0.414694043 | 0           |
| DOCK9-AS2 | COL13A1  | 0.446585697 | 0           |
| DOCK9-AS2 | S100A5   | 0.567644823 | 0           |
| DOCK9-AS2 | MISP     | 0.378916903 | 9.08E-17    |
| DOCK9-AS2 | HES6     | 0.510994931 | 0           |
| DOCK9-AS2 | PSD3     | 0.419833228 | 0           |
| DOCK9-AS2 | DOK7     | 0.704050159 | 0           |
| DOCK9-AS2 | ZMAT3    | 0.348071582 | 8.13E-14    |
| DOCK9-AS2 | MFAP2    | 0.520260441 | 0           |
| DOCK9-AS2 | TMEM79   | 0.581960728 | 0           |
| DOCK9-AS2 | SLC1A5   | 0.436264492 | 0           |
| DOCK9-AS2 | BBC3     | 0.483232014 | 0           |
| DOCK9-AS2 | HLA-DQB2 | 0.164362286 | 0.000553875 |
| DOCK9-AS2 | C1QL1    | 0.70843704  | 0           |
| DOCK9-AS2 | TMEM215  | 0.524686859 | 2.01E-32    |
| DOCK9-AS2 | PNP      | 0.430803337 | 0           |
| DOCK9-AS2 | ARNTL    | 0.64245625  | 0           |
| DOCK9-AS2 | CLDN2    | 0.465739896 | 5.10E-25    |
| DOCK9-AS2 | MVP      | 0.446081324 | 0           |
| DOCK9-AS2 | LGALS1   | 0.390755907 | 0           |
| DOCK9-AS2 | BIRC7    | 0.463059131 | 1.03E-24    |
| DOCK9-AS2 | COL8A1   | 0.491236877 | 0           |
| DOCK9-AS2 | PERP     | 0.464404412 | 0           |
| DOCK9-AS2 | GJA4     | 0.545932111 | 0           |
| DOCK9-AS2 | IGFL2    | 0.452464889 | 1.53E-23    |
| DOCK9-AS2 | DAPK2    | 0.73201335  | 0           |
| DOCK9-AS2 | MAMLD1   | 0.61417804  | 0           |
| DOCK9-AS2 | ETV5     | 0.533214001 | 0           |
| DOCK9-AS2 | RUNX1    | 0.380658947 | 4.26E-17    |

|           |           |             |             |
|-----------|-----------|-------------|-------------|
| DOCK9-AS2 | LONRF2    | 0.608595756 | 0           |
| DOCK9-AS2 | SPOCK1    | 0.356770879 | 1.65E-14    |
| DOCK9-AS2 | XKRX      | 0.580532712 | 0           |
| DOCK9-AS2 | TGFB1     | 0.471394287 | 0           |
| DOCK9-AS2 | ERP27     | 0.370328098 | 1.01E-15    |
| DOCK9-AS2 | TNFRSF10C | 0.302838728 | 1.14E-10    |
| DOCK9-AS2 | PALM      | 0.761629226 | 0           |
| DOCK9-AS2 | TSC22D1   | 0.694199854 | 0           |
| DOCK9-AS2 | TGM2      | 0.228244595 | 1.44E-06    |
| DOCK9-AS2 | UBE2QL1   | 0.599865113 | 0           |
| DOCK9-AS2 | ECE1      | 0.664395192 | 0           |
| DOCK9-AS2 | COL8A2    | 0.532656723 | 0           |
| DOCK9-AS2 | HIST3H2A  | 0.41261542  | 0           |
| DOCK9-AS2 | TNFRSF21  | 0.388863941 | 0           |
| DOCK9-AS2 | SOX4      | 0.503663086 | 0           |
| DOCK9-AS2 | ELF3      | 0.473372915 | 0           |
| DOCK9-AS2 | TPD52L1   | 0.655539449 | 0           |
| DOCK9-AS2 | INHBB     | 0.689949988 | 0           |
| DOCK9-AS2 | HPN       | 0.54003892  | 0           |
| DOCK9-AS2 | MMP7      | 0.212566057 | 7.04E-06    |
| DOCK9-AS2 | RAB27A    | 0.635285816 | 0           |
| DOCK9-AS2 | IGF2BP2   | 0.604089023 | 0           |
| DOCK9-AS2 | ITGB4     | 0.482741683 | 0           |
| DOCK9-AS2 | PPP1R1B   | 0.671124797 | 0           |
| DOCK9-AS2 | NPDC1     | 0.560786998 | 0           |
| DOCK9-AS2 | CCL13     | 0.389536175 | 2.34E-17    |
| DOCK9-AS2 | SPINT1    | 0.532575876 | 0           |
| DOCK9-AS2 | HEY2      | 0.553398418 | 0           |
| DOCK9-AS2 | CST2      | 0.392217724 | 1.35E-17    |
| DOCK9-AS2 | ADM       | 0.315114023 | 1.82E-11    |
| DOCK9-AS2 | VSTM2L    | 0.175238641 | 0.000229226 |
| DOCK9-AS2 | FAM84A    | 0.391843372 | 0           |
| DOCK9-AS2 | P4HA2     | 0.395434121 | 0           |
| DOCK9-AS2 | LPL       | 0.518204796 | 0           |
| DOCK9-AS2 | TMEM173   | 0.418110758 | 0           |
| DOCK9-AS2 | DHRS3     | 0.79749232  | 0           |
| DOCK9-AS2 | SCN1B     | 0.48988602  | 0           |
| DOCK9-AS2 | GLT1D1    | 0.551540351 | 0           |
| DOCK9-AS2 | PHYHIP    | 0.496543713 | 0           |
| DOCK9-AS2 | BHLHE40   | 0.392229453 | 0           |
| DOCK9-AS2 | BID       | 0.72274018  | 0           |
| DOCK9-AS2 | POSTN     | 0.08395127  | 0.078911708 |
| DOCK9-AS2 | ITGA3     | 0.468642222 | 0           |
| DOCK9-AS2 | RSP04     | 0.64534292  | 0           |
| DOCK9-AS2 | ADAMTS9   | 0.523227107 | 0           |
| DOCK9-AS2 | ABTB2     | 0.55839534  | 0           |
| DOCK9-AS2 | KCNQ3     | 0.521541514 | 0           |
| DOCK9-AS2 | ANXA1     | 0.652720578 | 0           |
| DOCK9-AS2 | S100A11   | 0.443646406 | 0           |
| DOCK9-AS2 | CEACAM6   | 0.313998675 | 1.68E-11    |
| DOCK9-AS2 | IER5L     | 0.540161042 | 0           |

|           |            |             |          |
|-----------|------------|-------------|----------|
| DOCK9-AS2 | KRT80      | 0.412520531 | 0        |
| DOCK9-AS2 | CDH6       | 0.340458333 | 3.06E-13 |
| DOCK9-AS2 | UNC5B      | 0.320046267 | 8.51E-12 |
| DOCK9-AS2 | PLEKHN1    | 0.604341493 | 0        |
| DOCK9-AS2 | SYTL1      | 0.507159797 | 0        |
| DOCK9-AS2 | TMEM163    | 0.55207224  | 0        |
| DOCK9-AS2 | C4orf48    | 0.377596116 | 1.44E-16 |
| DOCK9-AS2 | B3GNT7     | 0.47231864  | 0        |
| DOCK9-AS2 | BAIAP3     | 0.763730543 | 0        |
| DOCK9-AS2 | PHLDA2     | 0.415672436 | 0        |
| DOCK9-AS2 | GAP43      | 0.641805518 | 2.49E-52 |
| DOCK9-AS2 | S100A1     | 0.367717869 | 1.81E-15 |
| DOCK9-AS2 | PTPRE      | 0.585005404 | 0        |
| DOCK9-AS2 | CCND1      | 0.466525019 | 0        |
| DOCK9-AS2 | ST6GALNAC5 | 0.424243529 | 1.32E-20 |
| DOCK9-AS2 | KRT17      | 0.332283833 | 1.20E-12 |
| DOCK9-AS2 | HPCAL4     | 0.698070164 | 0        |
| DOCK9-AS2 | GABBR2     | 0.356631879 | 1.69E-14 |
| DOCK9-AS2 | DIRAS3     | 0.620924239 | 0        |
| DOCK9-AS2 | SERINC2    | 0.349604842 | 6.18E-14 |
| DOCK9-AS2 | PTCHD4     | 0.377763626 | 1.36E-16 |
| DOCK9-AS2 | EPS8       | 0.619824008 | 0        |
| DOCK9-AS2 | LY6E       | 0.622395232 | 0        |
| DOCK9-AS2 | UPP1       | 0.594112766 | 0        |
| DOCK9-AS2 | AHNAK2     | 0.36734115  | 1.96E-15 |
| DOCK9-AS2 | PLXNC1     | 0.515887461 | 0        |
| DOCK9-AS2 | TNC        | 0.204994227 | 1.56E-05 |
| DOCK9-AS2 | DUSP4      | 0.439863184 | 0        |
| DOCK9-AS2 | NRCAM      | 0.540521308 | 0        |
| DOCK9-AS2 | NRP2       | 0.582984792 | 0        |
| DOCK9-AS2 | CTSC       | 0.411621709 | 0        |
| DOCK9-AS2 | AMIGO2     | 0.628343739 | 0        |
| DOCK9-AS2 | NAB2       | 0.684267142 | 0        |
| DOCK9-AS2 | TBC1D2     | 0.532836856 | 0        |
| DOCK9-AS2 | PHLDA3     | 0.398703183 | 0        |
| DOCK9-AS2 | PTP4A3     | 0.438071923 | 0        |
| DOCK9-AS2 | CRABP2     | 0.322535083 | 5.76E-12 |
| DOCK9-AS2 | GOS2       | 0.442469299 | 0        |
| DOCK9-AS2 | S100A6     | 0.522072411 | 0        |
| DOCK9-AS2 | FOXQ1      | 0.507830261 | 0        |
| DOCK9-AS2 | LRG1       | 0.567783965 | 0        |
| DOCK9-AS2 | LAMP5      | 0.431372955 | 0        |
| DOCK9-AS2 | ALDH3B1    | 0.534507272 | 0        |
| DOCK9-AS2 | CDH2       | 0.366389848 | 2.41E-15 |
| DOCK9-AS2 | SCG5       | 0.510587291 | 0        |
| DOCK9-AS2 | ZCCHC16    | 0.644993312 | 5.36E-53 |
| DOCK9-AS2 | GRB7       | 0.720417739 | 0        |
| DOCK9-AS2 | TIAM1      | 0.569839894 | 0        |
| DOCK9-AS2 | FXYD5      | 0.412968736 | 0        |
| DOCK9-AS2 | CLDN9      | 0.529929195 | 0        |
| DOCK9-AS2 | FAM43A     | 0.638063129 | 0        |



|           |         |             |          |
|-----------|---------|-------------|----------|
| DOCK9-AS2 | CHST2   | 0.661415762 | 0        |
| DOCK9-AS2 | HMG2    | 0.499697887 | 0        |
| DOCK9-AS2 | GALNT7  | 0.489837086 | 0        |
| DOCK9-AS2 | CBLN1   | 0.439289878 | 0        |
| DOCK9-AS2 | STRA6   | 0.585623814 | 0        |
| DOCK9-AS2 | MUC21   | 0.399508637 | 2.98E-18 |
| DOCK9-AS2 | PRR36   | 0.603517277 | 0        |
| DOCK9-AS2 | NFE2L3  | 0.316871669 | 1.39E-11 |
| DOCK9-AS2 | NR1D1   | 0.3696921   | 1.16E-15 |
| DOCK9-AS2 | MUC1    | 0.342482065 | 2.16E-13 |
| DOCK9-AS2 | NAT8L   | 0.591294746 | 0        |
| DOCK9-AS2 | APOC1   | 0.535534031 | 0        |
| DOCK9-AS2 | EVA1A   | 0.604501911 | 0        |
| DOCK9-AS2 | ENTPD1  | 0.570753609 | 0        |
| DOCK9-AS2 | COL1A1  | 0.251265329 | 1.05E-07 |
| DOCK9-AS2 | FNDC4   | 0.368466202 | 1.53E-15 |
| DOCK9-AS2 | FRMD3   | 0.485380989 | 0        |
| DOCK9-AS2 | SHROOM4 | 0.61139789  | 0        |
| DOCK9-AS2 | NELL2   | 0.615469609 | 0        |
| DOCK9-AS2 | EPHB3   | 0.500055458 | 0        |
| DOCK9-AS2 | TMC6    | 0.600442106 | 0        |
| DOCK9-AS2 | NOD1    | 0.776866931 | 0        |
| DOCK9-AS2 | GGCT    | 0.737064737 | 0        |
| DOCK9-AS2 | ICAM1   | 0.442463484 | 0        |
| DOCK9-AS2 | PRSS23  | 0.493641441 | 0        |
| DOCK9-AS2 | CFI     | 0.475345302 | 0        |
| DOCK9-AS2 | CD55    | 0.503630038 | 0        |
| DOCK9-AS2 | RASD2   | 0.696065012 | 0        |
| DOCK9-AS2 | KLK11   | 0.596355253 | 1.26E-43 |
| DOCK9-AS2 | ICAM5   | 0.738308223 | 0        |
| DOCK9-AS2 | ADORA1  | 0.384275085 | 0        |
| DOCK9-AS2 | ITGA2   | 0.418522369 | 0        |
| DOCK9-AS2 | ABCC3   | 0.600593872 | 0        |
| DOCK9-AS2 | MFGE8   | 0.520456035 | 0        |
| DOCK9-AS2 | STK32A  | 0.411954743 | 0        |
| DOCK9-AS2 | CYSLTR2 | 0.645754673 | 0        |
| DOCK9-AS2 | LAD1    | 0.594696426 | 0        |
| DOCK9-AS2 | MGAT3   | 0.541954998 | 0        |
| DOCK9-AS2 | IGFBP6  | 0.581473376 | 0        |
| DOCK9-AS2 | CYP2S1  | 0.456668615 | 0        |
| DOCK9-AS2 | KCNJ2   | 0.45556342  | 0        |
| DOCK9-AS2 | FAM20A  | 0.442598655 | 0        |
| DOCK9-AS2 | TGFA    | 0.58851644  | 0        |
| DOCK9-AS2 | MXRA8   | 0.738955284 | 0        |
| DOCK9-AS2 | C8orf4  | 0.284799882 | 1.46E-09 |
| DOCK9-AS2 | CLDN10  | 0.54458909  | 2.88E-35 |
| DOCK9-AS2 | PDE5A   | 0.630562072 | 0        |
| DOCK9-AS2 | APOE    | 0.572532814 | 0        |
| DOCK9-AS2 | SPOCK2  | 0.491444242 | 0        |
| DOCK9-AS2 | TENM1   | 0.525847122 | 0        |
| DOCK9-AS2 | SLIT1   | 0.436910419 | 0        |

|           |           |             |          |
|-----------|-----------|-------------|----------|
| DOCK9-AS2 | CXCL14    | 0.431782723 | 0        |
| DOCK9-AS2 | ECM1      | 0.249957165 | 1.23E-07 |
| DOCK9-AS2 | DUSP5     | 0.55188459  | 0        |
| DOCK9-AS2 | SEZ6L2    | 0.395291149 | 0        |
| DOCK9-AS2 | THRSP     | 0.243117637 | 2.74E-07 |
| DOCK9-AS2 | C19orf33  | 0.505372365 | 0        |
| DOCK9-AS2 | MPZL2     | 0.527360666 | 0        |
| DOCK9-AS2 | CTSH      | 0.668555843 | 0        |
| DOCK9-AS2 | CYP1B1    | 0.511639297 | 0        |
| DOCK9-AS2 | ALOX5     | 0.249920146 | 1.24E-07 |
| DOCK9-AS2 | SYTL5     | 0.619739283 | 6.30E-48 |
| DOCK9-AS2 | TNFRSF12A | 0.668153593 | 0        |
| DOCK9-AS2 | DUSP6     | 0.613808979 | 0        |
| DOCK9-AS2 | ALOX15B   | 0.426079026 | 0        |
| DOCK9-AS2 | SDC4      | 0.791704088 | 0        |
| DOCK9-AS2 | MDK       | 0.684058641 | 0        |
| DOCK9-AS2 | KRT19     | 0.487683147 | 0        |
| DOCK9-AS2 | MET       | 0.551921751 | 0        |
| DOCK9-AS2 | TESC      | 0.657288868 | 0        |
| DOCK9-AS2 | CXCL17    | 0.411970927 | 2.05E-19 |
| DOCK9-AS2 | NPC2      | 0.644874573 | 0        |
| DOCK9-AS2 | COMP      | 0.461005852 | 0        |
| DOCK9-AS2 | TUSC3     | 0.645290724 | 0        |
| DOCK9-AS2 | TMPRSS4   | 0.512872429 | 0        |
| DOCK9-AS2 | LGALS3    | 0.587551381 | 0        |
| DOCK9-AS2 | CRLF1     | 0.485483253 | 0        |
| DOCK9-AS2 | CTXN1     | 0.670258739 | 0        |
| DOCK9-AS2 | PCSK1N    | 0.396775758 | 0        |
| DOCK9-AS2 | NMU       | 0.453963987 | 1.05E-23 |
| DOCK9-AS2 | GALE      | 0.64435318  | 0        |
| DOCK9-AS2 | PCSK2     | 0.254691121 | 6.99E-08 |
| DOCK9-AS2 | GJB3      | 0.712280684 | 0        |
| DOCK9-AS2 | SLPI      | 0.297419699 | 2.50E-10 |
| DOCK9-AS2 | AGR2      | 0.471423931 | 0        |
| DOCK9-AS2 | MRC2      | 0.533013443 | 0        |
| DOCK9-AS2 | GOLT1A    | 0.699314927 | 0        |
| DOCK9-AS2 | SLC27A6   | 0.592783631 | 5.31E-43 |
| DOCK9-AS2 | KCNN4     | 0.463822596 | 0        |
| DOCK9-AS2 | ETV4      | 0.746616927 | 2.26E-79 |
| DOCK9-AS2 | SYT12     | 0.701197815 | 0        |
| DOCK9-AS2 | PVRL4     | 0.549912345 | 0        |
| DOCK9-AS2 | PLCD3     | 0.686733831 | 0        |
| DOCK9-AS2 | PLAU      | 0.284568404 | 1.50E-09 |
| DOCK9-AS2 | LRRK2     | 0.38338378  | 8.80E-19 |
| DOCK9-AS2 | SFN       | 0.417495326 | 0        |
| DOCK9-AS2 | LPAR5     | 0.649563    | 0        |
| DOCK9-AS2 | NGEF      | 0.563349285 | 0        |
| DOCK9-AS2 | DTX4      | 0.64865042  | 0        |
| DOCK9-AS2 | CST6      | 0.705156347 | 0        |
| DOCK9-AS2 | QPCT      | 0.624458111 | 0        |
| DOCK9-AS2 | TIMP1     | 0.676205403 | 0        |

|                |          |              |          |
|----------------|----------|--------------|----------|
| DOCK9-AS2      | CAMK2N1  | 0.662135585  | 0        |
| DOCK9-AS2      | KLHDC8A  | 0.432470065  | 0        |
| DOCK9-AS2      | PDLIM4   | 0.661641708  | 0        |
| DOCK9-AS2      | SCEL     | 0.444680398  | 0        |
| DOCK9-AS2      | LCN2     | 0.344988894  | 1.40E-13 |
| DOCK9-AS2      | PROS1    | 0.520142433  | 0        |
| DOCK9-AS2      | GABRB2   | 0.643268977  | 0        |
| DOCK9-AS2      | TMPRSS6  | 0.624820505  | 0        |
| DOCK9-AS2      | KLK7     | 0.578292266  | 1.54E-40 |
| DOCK9-AS2      | PDZK1IP1 | 0.262774845  | 2.59E-08 |
| DOCK9-AS2      | CDH3     | 0.661665111  | 0        |
| DOCK9-AS2      | LRP4     | 0.57657574   | 0        |
| DOCK9-AS2      | IGSF1    | 0.515366777  | 0        |
| DOCK9-AS2      | B3GNT3   | 0.429241001  | 0        |
| DOCK9-AS2      | CLDN1    | 0.44651265   | 0        |
| DOCK9-AS2      | GDF15    | 0.44715574   | 0        |
| DOCK9-AS2      | ARHGAP36 | 0.470712777  | 1.37E-25 |
| DOCK9-AS2      | LAMB3    | 0.507174689  | 0        |
| DOCK9-AS2      | KLK10    | 0.691862662  | 0        |
| DOCK9-AS2      | DPP4     | 0.442888144  | 0        |
| DOCK9-AS2      | METTL7B  | 0.679315466  | 0        |
| DOCK9-AS2      | LIPH     | 0.531218778  | 0        |
| DOCK9-AS2      | CLDN16   | 0.386347041  | 0        |
| DOCK9-AS2      | CHI3L1   | 0.367306399  | 1.98E-15 |
| DOCK9-AS2      | SLC22A31 | 0.644144837  | 8.08E-53 |
| DOCK9-AS2      | TACSTD2  | 0.619119078  | 0        |
| DOCK9-AS2      | SFTPB    | 0.396176071  | 0        |
| DOCK9-AS2      | RXRG     | 0.693863133  | 0        |
| DOCK9-AS2      | DCSTAMP  | 0.603200523  | 7.53E-45 |
| DOCK9-AS2      | CITED1   | 0.54751629   | 0        |
| DOCK9-AS2      | SERPINA1 | 0.590411952  | 0        |
| DOCK9-AS2      | PRR15    | 0.711911624  | 0        |
| DOCK9-AS2      | SLC34A2  | 0.454748991  | 0        |
| DOCK9-AS2      | FN1      | 0.389229739  | 0        |
| DOCK9-AS2      | ZCCHC12  | 0.648949696  | 0        |
| RP11-350J20.12 | TFF3     | -0.490349552 | 6.17E-28 |
| RP11-350J20.12 | CCL21    | -0.32170389  | 5.00E-12 |
| RP11-350J20.12 | TPO      | -0.518932648 | 1.24E-31 |
| RP11-350J20.12 | MT1G     | -0.499162975 | 4.86E-29 |
| RP11-350J20.12 | DI01     | -0.511420452 | 1.25E-30 |
| RP11-350J20.12 | DPT      | -0.304591841 | 7.07E-11 |
| RP11-350J20.12 | CDH16    | -0.519543192 | 1.02E-31 |
| RP11-350J20.12 | CRABP1   | -0.589927242 | 1.66E-42 |
| RP11-350J20.12 | SLC26A7  | -0.627510569 | 1.94E-49 |
| RP11-350J20.12 | MT1H     | -0.491284125 | 4.73E-28 |
| RP11-350J20.12 | SLC26A4  | -0.622846704 | 1.59E-48 |
| RP11-350J20.12 | SLC5A8   | -0.639216779 | 8.53E-52 |
| RP11-350J20.12 | PKHD1L1  | -0.469957375 | 1.67E-25 |
| RP11-350J20.12 | TFCP2L1  | -0.618653034 | 1.02E-47 |
| RP11-350J20.12 | WSCD2    | -0.587017239 | 5.24E-42 |
| RP11-350J20.12 | IPCEF1   | -0.566708913 | 1.17E-38 |

|                |           |              |             |
|----------------|-----------|--------------|-------------|
| RP11-350J20.12 | SLC5A5    | -0.362173563 | 4.72E-15    |
| RP11-350J20.12 | MT1F      | -0.44755565  | 5.20E-23    |
| RP11-350J20.12 | FOSB      | -0.28603095  | 1.04E-09    |
| RP11-350J20.12 | SEMA3D    | -0.533195386 | 1.29E-33    |
| RP11-350J20.12 | BMP8A     | -0.56315607  | 4.26E-38    |
| RP11-350J20.12 | MATN2     | -0.648930108 | 7.85E-54    |
| RP11-350J20.12 | PLA2R1    | -0.560709071 | 1.03E-37    |
| RP11-350J20.12 | COL23A1   | -0.604817178 | 3.84E-45    |
| RP11-350J20.12 | HGD       | -0.610502068 | 3.47E-46    |
| RP11-350J20.12 | TCEAL2    | -0.45263184  | 1.47E-23    |
| RP11-350J20.12 | CHRD1     | -0.287115033 | 8.90E-10    |
| RP11-350J20.12 | TNFRSF11B | -0.45269127  | 1.45E-23    |
| RP11-350J20.12 | FAM167A   | -0.631658709 | 2.92E-50    |
| RP11-350J20.12 | KIT       | -0.554302435 | 1.00E-36    |
| RP11-350J20.12 | SLC4A4    | -0.672294467 | 4.78E-59    |
| RP11-350J20.12 | SMOC2     | -0.426798497 | 7.33E-21    |
| RP11-350J20.12 | FHL1      | -0.606397189 | 1.98E-45    |
| RP11-350J20.12 | OTOS      | -0.459282437 | 2.72E-24    |
| RP11-350J20.12 | IGFBPL1   | -0.651773213 | 1.93E-54    |
| RP11-350J20.12 | HBB       | -0.354594651 | 1.88E-14    |
| RP11-350J20.12 | BEX1      | -0.476347036 | 3.01E-26    |
| RP11-350J20.12 | FABP4     | -0.539543641 | 1.58E-34    |
| RP11-350J20.12 | LMOD1     | -0.599205832 | 3.92E-44    |
| RP11-350J20.12 | SOD3      | -0.482922033 | 4.96E-27    |
| RP11-350J20.12 | TMEM171   | -0.449784998 | 2.99E-23    |
| RP11-350J20.12 | PI16      | -0.312748869 | 2.04E-11    |
| RP11-350J20.12 | ZMAT4     | -0.568456427 | 6.14E-39    |
| RP11-350J20.12 | MFAP4     | -0.328067151 | 1.79E-12    |
| RP11-350J20.12 | CWH43     | -0.506004896 | 6.43E-30    |
| RP11-350J20.12 | SPX       | -0.660861781 | 1.95E-56    |
| RP11-350J20.12 | APOD      | -0.120314141 | 0.01164099  |
| RP11-350J20.12 | DPP6      | -0.549448294 | 5.45E-36    |
| RP11-350J20.12 | MMRN1     | -0.462186086 | 1.29E-24    |
| RP11-350J20.12 | WDR72     | -0.61702799  | 2.07E-47    |
| RP11-350J20.12 | MPPED2    | -0.681527874 | 3.05E-61    |
| RP11-350J20.12 | PAPSS2    | -0.483179612 | 4.62E-27    |
| RP11-350J20.12 | DCN       | -0.178123571 | 0.000175776 |
| RP11-350J20.12 | SORBS2    | -0.640671132 | 4.27E-52    |
| RP11-350J20.12 | EGR2      | -0.315372315 | 1.36E-11    |
| RP11-350J20.12 | EDN3      | -0.523447624 | 2.99E-32    |
| RP11-350J20.12 | DIO2      | -0.670829274 | 1.05E-58    |
| RP11-350J20.12 | ITPR1     | -0.627706874 | 1.78E-49    |
| RP11-350J20.12 | CFD       | -0.201772174 | 2.05E-05    |
| RP11-350J20.12 | CPXM1     | -0.400180717 | 2.59E-18    |
| RP11-350J20.12 | ELMO1     | -0.611851946 | 1.95E-46    |
| RP11-350J20.12 | GPC3      | -0.430527236 | 3.09E-21    |
| RP11-350J20.12 | MYOC      | -0.302134421 | 1.02E-10    |
| RP11-350J20.12 | DEPTOR    | -0.524391731 | 2.21E-32    |
| RP11-350J20.12 | DGKI      | -0.483808737 | 3.88E-27    |
| RP11-350J20.12 | CARTPT    | -0.482599619 | 5.43E-27    |
| RP11-350J20.12 | IYD       | -0.532426602 | 1.66E-33    |

|                |            |              |             |
|----------------|------------|--------------|-------------|
| RP11-350J20.12 | LYVE1      | -0.359719917 | 7.41E-15    |
| RP11-350J20.12 | CLCNKB     | -0.553638631 | 1.27E-36    |
| RP11-350J20.12 | NCAM1      | -0.471304178 | 1.17E-25    |
| RP11-350J20.12 | HBA2       | -0.254811856 | 6.19E-08    |
| RP11-350J20.12 | GLT8D2     | -0.53061738  | 2.99E-33    |
| RP11-350J20.12 | OGDHL      | -0.597480153 | 7.94E-44    |
| RP11-350J20.12 | LIFR       | -0.711643323 | 5.29E-69    |
| RP11-350J20.12 | CSGALNACT1 | -0.415556939 | 9.31E-20    |
| RP11-350J20.12 | RAP1GAP    | -0.597118535 | 9.21E-44    |
| RP11-350J20.12 | COL9A3     | -0.514118859 | 5.49E-31    |
| RP11-350J20.12 | FBLN1      | -0.172355776 | 0.000285464 |
| RP11-350J20.12 | EFEMP1     | -0.318919911 | 7.78E-12    |
| RP11-350J20.12 | AOX1       | -0.515033169 | 4.14E-31    |
| RP11-350J20.12 | GRIN2C     | -0.512643029 | 8.63E-31    |
| RP11-350J20.12 | C11orf74   | -0.528776528 | 5.43E-33    |
| RP11-350J20.12 | PPARGC1A   | -0.615007358 | 4.99E-47    |
| RP11-350J20.12 | ANGPTL1    | -0.6140625   | 7.52E-47    |
| RP11-350J20.12 | SCARA5     | -0.280846759 | 2.12E-09    |
| RP11-350J20.12 | LTF        | -0.503766771 | 1.25E-29    |
| RP11-350J20.12 | CA4        | -0.572705342 | 1.27E-39    |
| RP11-350J20.12 | TG         | -0.630334646 | 5.36E-50    |
| RP11-350J20.12 | FCGBP      | -0.481716618 | 6.93E-27    |
| RP11-350J20.12 | PBX4       | -0.480976434 | 8.50E-27    |
| RP11-350J20.12 | CYR61      | -0.314503129 | 1.56E-11    |
| RP11-350J20.12 | FOS        | -0.312434555 | 2.14E-11    |
| RP11-350J20.12 | KHDRBS2    | -0.497176313 | 8.68E-29    |
| RP11-350J20.12 | MUM1L1     | -0.384577481 | 6.36E-17    |
| RP11-350J20.12 | RGS16      | -0.525748558 | 1.44E-32    |
| RP11-350J20.12 | MT1M       | -0.418770647 | 4.55E-20    |
| RP11-350J20.12 | LRP2       | -0.508187241 | 3.34E-30    |
| RP11-350J20.12 | MAFB       | -0.471840328 | 1.01E-25    |
| RP11-350J20.12 | KCNK2      | -0.458373607 | 3.43E-24    |
| RP11-350J20.12 | TBC1D4     | -0.66686907  | 8.57E-58    |
| RP11-350J20.12 | MIOX       | -0.519995463 | 8.86E-32    |
| RP11-350J20.12 | TPPP       | -0.609238641 | 5.95E-46    |
| RP11-350J20.12 | FMOD       | -0.571431428 | 2.04E-39    |
| RP11-350J20.12 | CITED2     | -0.351021738 | 3.56E-14    |
| RP11-350J20.12 | RGS8       | -0.579218744 | 1.08E-40    |
| RP11-350J20.12 | ABI3BP     | -0.475293459 | 4.01E-26    |
| RP11-350J20.12 | ADH1B      | -0.3621287   | 4.75E-15    |
| RP11-350J20.12 | OGN        | -0.273410231 | 5.76E-09    |
| RP11-350J20.12 | NR4A1      | -0.238170149 | 4.45E-07    |
| RP11-350J20.12 | FOXJ1      | -0.524240047 | 2.32E-32    |
| RP11-350J20.12 | ALDH1A1    | -0.596818334 | 1.04E-43    |
| RP11-350J20.12 | OCA2       | -0.409342934 | 3.64E-19    |
| RP11-350J20.12 | TMEM139    | -0.328654788 | 1.62E-12    |
| RP11-350J20.12 | ARHGAP24   | -0.630865761 | 4.20E-50    |
| RP11-350J20.12 | SLC25A15   | -0.601087249 | 1.81E-44    |
| RP11-350J20.12 | DES        | -0.193782839 | 4.36E-05    |
| RP11-350J20.12 | GDF10      | -0.481678633 | 7.00E-27    |
| RP11-350J20.12 | KIAA1324   | -0.542714153 | 5.44E-35    |

|                |          |              |             |
|----------------|----------|--------------|-------------|
| RP11-350J20.12 | JUN      | -0.347344218 | 6.81E-14    |
| RP11-350J20.12 | C7       | -0.149067585 | 0.001736648 |
| RP11-350J20.12 | LGI3     | -0.643500386 | 1.10E-52    |
| RP11-350J20.12 | CDON     | -0.719133747 | 4.33E-71    |
| RP11-350J20.12 | BCL2     | -0.623938223 | 9.74E-49    |
| RP11-350J20.12 | HLF      | -0.681171292 | 3.72E-61    |
| RP11-350J20.12 | EGR1     | -0.388063802 | 3.15E-17    |
| RP11-350J20.12 | IP6K3    | -0.509783705 | 2.06E-30    |
| RP11-350J20.12 | SCUBE3   | -0.501385302 | 2.53E-29    |
| RP11-350J20.12 | PKNOX2   | -0.513312011 | 7.03E-31    |
| RP11-350J20.12 | SMAD9    | -0.42979356  | 3.67E-21    |
| RP11-350J20.12 | IQGAP2   | -0.61448298  | 6.27E-47    |
| RP11-350J20.12 | GNA14    | -0.566130992 | 1.44E-38    |
| RP11-350J20.12 | LAYN     | -0.490056159 | 6.71E-28    |
| RP11-350J20.12 | AVPR1A   | -0.671166921 | 8.76E-59    |
| RP11-350J20.12 | PDLIM3   | -0.438773502 | 4.40E-22    |
| RP11-350J20.12 | GPM6A    | -0.559583582 | 1.54E-37    |
| RP11-350J20.12 | SDPR     | -0.557445294 | 3.30E-37    |
| RP11-350J20.12 | CRYAB    | -0.332862784 | 8.09E-13    |
| RP11-350J20.12 | FOXA2    | -0.300803113 | 1.24E-10    |
| RP11-350J20.12 | C8orf88  | -0.586798786 | 5.71E-42    |
| RP11-350J20.12 | ISM1     | -0.487665541 | 1.32E-27    |
| RP11-350J20.12 | BMP2     | -0.219232573 | 3.54E-06    |
| RP11-350J20.12 | ID4      | -0.493108312 | 2.81E-28    |
| RP11-350J20.12 | NUPR1    | -0.409440931 | 3.57E-19    |
| RP11-350J20.12 | SERTM1   | -0.483929735 | 3.75E-27    |
| RP11-350J20.12 | IRS1     | -0.662932837 | 6.70E-57    |
| RP11-350J20.12 | FIBIN    | -0.343358909 | 1.36E-13    |
| RP11-350J20.12 | PODN     | -0.210563328 | 8.62E-06    |
| RP11-350J20.12 | TDRD9    | -0.408020631 | 4.85E-19    |
| RP11-350J20.12 | EPHA3    | -0.452620422 | 1.47E-23    |
| RP11-350J20.12 | AIF1L    | -0.366921558 | 1.95E-15    |
| RP11-350J20.12 | EBF4     | -0.491632127 | 4.28E-28    |
| RP11-350J20.12 | ADM2     | -0.446901349 | 6.10E-23    |
| RP11-350J20.12 | GSTM3    | -0.580744833 | 6.00E-41    |
| RP11-350J20.12 | HSD17B6  | -0.253657006 | 7.13E-08    |
| RP11-350J20.12 | AGR3     | -0.259571659 | 3.43E-08    |
| RP11-350J20.12 | EPHB1    | -0.618277517 | 1.20E-47    |
| RP11-350J20.12 | TMOD1    | -0.467220362 | 3.45E-25    |
| RP11-350J20.12 | WASF3    | -0.666891055 | 8.47E-58    |
| RP11-350J20.12 | SELV     | -0.496604126 | 1.02E-28    |
| RP11-350J20.12 | ENPP1    | -0.481907675 | 6.57E-27    |
| RP11-350J20.12 | SYNE1    | -0.656872382 | 1.49E-55    |
| RP11-350J20.12 | PLCH1    | -0.587287066 | 4.71E-42    |
| RP11-350J20.12 | CCDC146  | -0.613150336 | 1.11E-46    |
| RP11-350J20.12 | SLC16A2  | -0.620119361 | 5.33E-48    |
| RP11-350J20.12 | IER2     | -0.358178628 | 9.82E-15    |
| RP11-350J20.12 | KCNAB1   | -0.511581509 | 1.19E-30    |
| RP11-350J20.12 | SYNDIG1  | -0.535208624 | 6.67E-34    |
| RP11-350J20.12 | C16orf89 | -0.57629252  | 3.28E-40    |
| RP11-350J20.12 | CTGF     | -0.196165933 | 3.49E-05    |

|                |          |              |             |
|----------------|----------|--------------|-------------|
| RP11-350J20.12 | NR4A3    | -0.148735186 | 0.001778888 |
| RP11-350J20.12 | KIAA1456 | -0.595163645 | 2.03E-43    |
| RP11-350J20.12 | AQP4     | -0.56291076  | 4.66E-38    |
| RP11-350J20.12 | RNF150   | -0.595805039 | 1.57E-43    |
| RP11-350J20.12 | C1S      | -0.119779268 | 0.012020324 |
| RP11-350J20.12 | PFKFB2   | -0.68598125  | 2.49E-62    |
| RP11-350J20.12 | PROX1    | -0.595066273 | 2.12E-43    |
| RP11-350J20.12 | TCF7L1   | -0.601107249 | 1.79E-44    |
| RP11-350J20.12 | HSPB6    | -0.340784539 | 2.12E-13    |
| RP11-350J20.12 | FHDC1    | -0.562216673 | 5.98E-38    |
| RP11-350J20.12 | PRR15L   | -0.628701871 | 1.13E-49    |
| RP11-350J20.12 | SLC1A1   | -0.515096056 | 4.06E-31    |
| RP11-350J20.12 | BTBD11   | -0.683184265 | 1.21E-61    |
| RP11-350J20.12 | TRIM58   | -0.532266466 | 1.75E-33    |
| RP11-350J20.12 | LRIG1    | -0.625704255 | 4.40E-49    |
| RP11-350J20.12 | ROR2     | -0.28356381  | 1.46E-09    |
| RP11-350J20.12 | GPR125   | -0.59014951  | 1.52E-42    |
| RP11-350J20.12 | FLRT1    | -0.613849387 | 8.24E-47    |
| RP11-350J20.12 | PGF      | -0.40815864  | 4.71E-19    |
| RP11-350J20.12 | DUSP1    | -0.250344083 | 1.07E-07    |
| RP11-350J20.12 | PLA2G7   | -0.331910125 | 9.48E-13    |
| RP11-350J20.12 | PLSCR4   | -0.581228999 | 4.98E-41    |
| RP11-350J20.12 | FAM46B   | -0.338294634 | 3.25E-13    |
| RP11-350J20.12 | GLDC     | -0.399849878 | 2.77E-18    |
| RP11-350J20.12 | ZBTB16   | -0.525672249 | 1.47E-32    |
| RP11-350J20.12 | OMD      | -0.19729364  | 3.14E-05    |
| RP11-350J20.12 | HSD11B2  | -0.603631762 | 6.29E-45    |
| RP11-350J20.12 | FGL2     | -0.260252996 | 3.15E-08    |
| RP11-350J20.12 | CLCNKA   | -0.606933644 | 1.58E-45    |
| RP11-350J20.12 | GATM     | -0.655309085 | 3.29E-55    |
| RP11-350J20.12 | TNS3     | -0.535623289 | 5.82E-34    |
| RP11-350J20.12 | TOB1     | -0.323719231 | 3.62E-12    |
| RP11-350J20.12 | MARC2    | -0.678326223 | 1.80E-60    |
| RP11-350J20.12 | LRRC2    | -0.559034312 | 1.88E-37    |
| RP11-350J20.12 | SORD     | -0.406784508 | 6.34E-19    |
| RP11-350J20.12 | RIMS4    | -0.584986657 | 1.16E-41    |
| RP11-350J20.12 | SLC29A4  | -0.477340686 | 2.30E-26    |
| RP11-350J20.12 | SLC39A14 | -0.695786054 | 8.51E-65    |
| RP11-350J20.12 | FAXDC2   | -0.602515847 | 1.00E-44    |
| RP11-350J20.12 | HSPB8    | -0.255495376 | 5.69E-08    |
| RP11-350J20.12 | CCL19    | 0.036806046  | 0.441754245 |
| RP11-350J20.12 | KCNIP3   | -0.585716629 | 8.72E-42    |
| RP11-350J20.12 | CGNL1    | -0.595228324 | 1.98E-43    |
| RP11-350J20.12 | ATF3     | -0.00656897  | 0.890837722 |
| RP11-350J20.12 | SGCD     | -0.303669286 | 8.11E-11    |
| RP11-350J20.12 | STARD13  | -0.521639991 | 5.29E-32    |
| RP11-350J20.12 | LDHD     | -0.623883899 | 9.97E-49    |
| RP11-350J20.12 | RCAN1    | -0.288790065 | 7.03E-10    |
| RP11-350J20.12 | ID3      | -0.260312994 | 3.12E-08    |
| RP11-350J20.12 | SYTL3    | -0.656858246 | 1.50E-55    |
| RP11-350J20.12 | MT1E     | -0.290628506 | 5.42E-10    |

|                |          |              |             |
|----------------|----------|--------------|-------------|
| RP11-350J20.12 | CAMK1D   | -0.638929709 | 9.77E-52    |
| RP11-350J20.12 | PRKCQ    | -0.69013634  | 2.31E-63    |
| RP11-350J20.12 | NUAK2    | -0.345623716 | 9.20E-14    |
| RP11-350J20.12 | LIPG     | -0.561605562 | 7.46E-38    |
| RP11-350J20.12 | SLC25A25 | -0.356060766 | 1.44E-14    |
| RP11-350J20.12 | PRKX     | -0.297613772 | 1.98E-10    |
| RP11-350J20.12 | SRPX     | -0.23330076  | 7.71E-07    |
| RP11-350J20.12 | FAM189A1 | -0.630738461 | 4.45E-50    |
| RP11-350J20.12 | PLEKHH1  | -0.515079603 | 4.08E-31    |
| RP11-350J20.12 | WNT11    | -0.43544682  | 9.72E-22    |
| RP11-350J20.12 | SNAI1    | -0.305869911 | 5.83E-11    |
| RP11-350J20.12 | FDCSP    | -0.062106727 | 0.194004182 |
| RP11-350J20.12 | MT1X     | -0.393544374 | 1.03E-17    |
| RP11-350J20.12 | ACACB    | -0.736622868 | 3.06E-76    |
| RP11-350J20.12 | ARC      | -0.217428953 | 4.27E-06    |
| RP11-350J20.12 | KLK4     | -0.25647046  | 5.04E-08    |
| RP11-350J20.12 | ZFPM2    | -0.39947436  | 3.00E-18    |
| RP11-350J20.12 | AKAP12   | -0.414664775 | 1.13E-19    |
| RP11-350J20.12 | GJB6     | -0.321694248 | 5.01E-12    |
| RP11-350J20.12 | ERO1LB   | -0.53890593  | 1.96E-34    |
| RP11-350J20.12 | DNALI1   | -0.428996215 | 4.41E-21    |
| RP11-350J20.12 | HKDC1    | -0.425186785 | 1.06E-20    |
| RP11-350J20.12 | ZFP36L2  | -0.448947654 | 3.68E-23    |
| RP11-350J20.12 | CAPSL    | -0.556048485 | 5.42E-37    |
| RP11-350J20.12 | CYP7B1   | -0.568984713 | 5.05E-39    |
| RP11-350J20.12 | CPQ      | -0.412904842 | 1.67E-19    |
| RP11-350J20.12 | RPS6KA6  | -0.625572013 | 4.67E-49    |
| RP11-350J20.12 | TLE1     | -0.446318888 | 7.04E-23    |
| RP11-350J20.12 | TP53INP2 | -0.574192033 | 7.26E-40    |
| RP11-350J20.12 | KATNAL2  | -0.664129458 | 3.60E-57    |
| RP11-350J20.12 | SGPP2    | -0.355377246 | 1.63E-14    |
| RP11-350J20.12 | CTH      | -0.468957601 | 2.18E-25    |
| RP11-350J20.12 | KIF12    | -0.234201648 | 6.97E-07    |
| RP11-350J20.12 | TMEM220  | -0.629240716 | 8.84E-50    |
| RP11-350J20.12 | CENPJ    | -0.38114208  | 1.26E-16    |
| RP11-350J20.12 | FAM155B  | -0.55722736  | 3.57E-37    |
| RP11-350J20.12 | WFS1     | -0.472394775 | 8.74E-26    |
| RP11-350J20.12 | SELENBP1 | -0.610007619 | 4.29E-46    |
| RP11-350J20.12 | SNTA1    | -0.523654737 | 2.80E-32    |
| RP11-350J20.12 | FRAS1    | -0.179065379 | 0.000162161 |
| RP11-350J20.12 | FBLN7    | -0.474767025 | 4.62E-26    |
| RP11-350J20.12 | AGPAT9   | -0.541846456 | 7.30E-35    |
| RP11-350J20.12 | GPR83    | -0.511467046 | 1.24E-30    |
| RP11-350J20.12 | PRTG     | -0.627082926 | 2.36E-49    |
| RP11-350J20.12 | EGR3     | -0.169112708 | 0.000372457 |
| RP11-350J20.12 | GRAMD2   | -0.31054101  | 2.87E-11    |
| RP11-350J20.12 | HYOU1    | -0.562576376 | 5.26E-38    |
| RP11-350J20.12 | FBLN5    | -0.339227648 | 2.77E-13    |
| RP11-350J20.12 | ITM2A    | -0.550581655 | 3.68E-36    |
| RP11-350J20.12 | SRF      | -0.357873604 | 1.04E-14    |
| RP11-350J20.12 | FGFR2    | -0.471275385 | 1.18E-25    |



|                |          |              |             |
|----------------|----------|--------------|-------------|
| RP11-350J20.12 | MT1A     | -0.243173513 | 2.49E-07    |
| RP11-350J20.12 | MAMDC2   | -0.256966738 | 4.74E-08    |
| RP11-350J20.12 | FHL2     | -0.320934586 | 5.65E-12    |
| RP11-350J20.12 | FTCDNL1  | -0.589310393 | 2.12E-42    |
| RP11-350J20.12 | PKIA     | -0.480955229 | 8.55E-27    |
| RP11-350J20.12 | DNAJB4   | -0.465621203 | 5.26E-25    |
| RP11-350J20.12 | SLC25A33 | -0.525415947 | 1.60E-32    |
| RP11-350J20.12 | EYA2     | -0.373063806 | 6.06E-16    |
| RP11-350J20.12 | LPAR1    | -0.271185842 | 7.73E-09    |
| RP11-350J20.12 | STX11    | -0.356224589 | 1.40E-14    |
| RP11-350J20.12 | ARHGEF28 | -0.519559645 | 1.02E-31    |
| RP11-350J20.12 | OR2W3    | -0.472405625 | 8.72E-26    |
| RP11-350J20.12 | ALDH1B1  | -0.608908569 | 6.84E-46    |
| RP11-350J20.12 | CXCL12   | -0.322288648 | 4.55E-12    |
| RP11-350J20.12 | OLFM2    | -0.413920406 | 1.34E-19    |
| RP11-350J20.12 | TUB      | -0.572826836 | 1.21E-39    |
| RP11-350J20.12 | HTRA3    | -0.14453251  | 0.002400478 |
| RP11-350J20.12 | CKB      | -0.31833277  | 8.54E-12    |
| RP11-350J20.12 | RGS2     | -0.073506137 | 0.124093986 |
| RP11-350J20.12 | SHANK2   | -0.591737038 | 8.07E-43    |
| RP11-350J20.12 | CNTFR    | -0.59672475  | 1.08E-43    |
| RP11-350J20.12 | CYTH3    | -0.642309226 | 1.95E-52    |
| RP11-350J20.12 | PLAC9    | -0.27252494  | 6.48E-09    |
| RP11-350J20.12 | WVOX     | -0.646433466 | 2.66E-53    |
| RP11-350J20.12 | NPR3     | -0.356252602 | 1.39E-14    |
| RP11-350J20.12 | SDC2     | -0.307784094 | 4.37E-11    |
| RP11-350J20.12 | KLF15    | -0.593828661 | 3.49E-43    |
| RP11-350J20.12 | TMEM164  | -0.626056866 | 3.75E-49    |
| RP11-350J20.12 | LONRF3   | -0.327000738 | 2.13E-12    |
| RP11-350J20.12 | GBP1     | -0.166668191 | 0.000453722 |
| RP11-350J20.12 | ARHGAP6  | -0.453673147 | 1.13E-23    |
| RP11-350J20.12 | TMEM119  | -0.177601959 | 0.00018377  |
| RP11-350J20.12 | SH3RF1   | -0.561459681 | 7.86E-38    |
| RP11-350J20.12 | CRELD2   | -0.368766097 | 1.37E-15    |
| RP11-350J20.12 | PCP4     | -0.07961562  | 0.095709045 |
| RP11-350J20.12 | GCSH     | -0.629033986 | 9.72E-50    |
| RP11-350J20.12 | IMPA2    | -0.462794644 | 1.10E-24    |
| RP11-350J20.12 | C1R      | -0.054865854 | 0.251317988 |
| RP11-350J20.12 | SUCNR1   | -0.393750961 | 9.88E-18    |
| RP11-350J20.12 | SFRP1    | -0.490838186 | 5.37E-28    |
| RP11-350J20.12 | UGT8     | -0.580352365 | 6.98E-41    |
| RP11-350J20.12 | TLE4     | -0.298023614 | 1.87E-10    |
| RP11-350J20.12 | ANTXR1   | -0.46334207  | 9.53E-25    |
| RP11-350J20.12 | GPX3     | -0.294106246 | 3.30E-10    |
| RP11-350J20.12 | DPY19L2  | -0.506597231 | 5.38E-30    |
| RP11-350J20.12 | FAM46C   | -0.589372873 | 2.07E-42    |
| RP11-350J20.12 | IL33     | -0.300322686 | 1.33E-10    |
| RP11-350J20.12 | PEG3     | -0.626019846 | 3.82E-49    |
| RP11-350J20.12 | FAHD2A   | -0.518894422 | 1.25E-31    |
| RP11-350J20.12 | PTGDS    | -0.10513011  | 0.027626698 |
| RP11-350J20.12 | CHCHD10  | -0.360987387 | 5.87E-15    |

|                |          |              |             |
|----------------|----------|--------------|-------------|
| RP11-350J20.12 | CD36     | -0.611932085 | 1.88E-46    |
| RP11-350J20.12 | ANKRD37  | -0.290446101 | 5.56E-10    |
| RP11-350J20.12 | TSPAN33  | -0.51007412  | 1.89E-30    |
| RP11-350J20.12 | PRDM16   | -0.54153973  | 8.09E-35    |
| RP11-350J20.12 | UST      | -0.649124498 | 7.14E-54    |
| RP11-350J20.12 | NEXN     | -0.528981059 | 5.08E-33    |
| RP11-350J20.12 | NUPR1L   | -0.21888628  | 3.67E-06    |
| RP11-350J20.12 | SLC24A3  | -0.5371972   | 3.45E-34    |
| RP11-350J20.12 | MARC1    | -0.589512655 | 1.96E-42    |
| RP11-350J20.12 | MYH11    | -0.30233572  | 9.89E-11    |
| RP11-350J20.12 | APOA1    | -0.388339408 | 2.98E-17    |
| RP11-350J20.12 | TMEM178B | -0.367051269 | 1.90E-15    |
| RP11-350J20.12 | CAPN6    | -0.155260722 | 0.001100023 |
| RP11-350J20.12 | PPM1L    | -0.668163915 | 4.33E-58    |
| RP11-350J20.12 | FZD8     | -0.498495979 | 5.91E-29    |
| RP11-350J20.12 | RCAN2    | -0.636377466 | 3.25E-51    |
| RP11-350J20.12 | COPZ2    | -0.492443869 | 3.40E-28    |
| RP11-350J20.12 | GAS1     | -0.32639225  | 2.35E-12    |
| RP11-350J20.12 | DACT1    | -0.347177274 | 7.02E-14    |
| RP11-350J20.12 | WBSCR17  | -0.468401026 | 2.53E-25    |
| RP11-350J20.12 | NCS1     | -0.34637929  | 8.07E-14    |
| RP11-350J20.12 | SPIRE2   | -0.299468737 | 1.51E-10    |
| RP11-350J20.12 | C15orf52 | -0.359288019 | 8.02E-15    |
| RP11-350J20.12 | SPAG5    | -0.380016662 | 1.57E-16    |
| RP11-350J20.12 | ARL4D    | -0.391398852 | 1.60E-17    |
| RP11-350J20.12 | FAM189A2 | -0.370177462 | 1.05E-15    |
| RP11-350J20.12 | MAP1LC3A | -0.477575216 | 2.16E-26    |
| RP11-350J20.12 | KLF6     | 0.003193495  | 0.946804168 |
| RP11-350J20.12 | ADD3     | -0.558063782 | 2.65E-37    |
| RP11-350J20.12 | TSPAN7   | -0.53139806  | 2.32E-33    |
| RP11-350J20.12 | KLF9     | -0.502926874 | 1.61E-29    |
| RP11-350J20.12 | KCNQ1    | -0.671218125 | 8.52E-59    |
| RP11-350J20.12 | MAN1A1   | -0.197216035 | 3.16E-05    |
| RP11-350J20.12 | MLF1     | -0.349041033 | 5.05E-14    |
| RP11-350J20.12 | RARB     | -0.641564999 | 2.79E-52    |
| RP11-350J20.12 | CDC42EP2 | -0.345988951 | 8.64E-14    |
| RP11-350J20.12 | FAM3B    | -0.210670629 | 8.53E-06    |
| RP11-350J20.12 | GADD45B  | -0.138254451 | 0.003702636 |
| RP11-350J20.12 | TMEM47   | -0.574995974 | 5.36E-40    |
| RP11-350J20.12 | SDF2L1   | -0.303551063 | 8.26E-11    |
| RP11-350J20.12 | CCDC85A  | -0.301913963 | 1.05E-10    |
| RP11-350J20.12 | CRYBG3   | -0.306610734 | 5.21E-11    |
| RP11-350J20.12 | FBLN2    | -0.109013366 | 0.022349014 |
| RP11-350J20.12 | PEBP4    | -0.41065514  | 2.74E-19    |
| RP11-350J20.12 | CDADC1   | -0.724251637 | 1.48E-72    |
| RP11-350J20.12 | FAM63A   | -0.610789008 | 3.07E-46    |
| RP11-350J20.12 | GLUL     | -0.373259189 | 5.84E-16    |
| RP11-350J20.12 | FREM2    | -0.505984559 | 6.47E-30    |
| RP11-350J20.12 | ACKR3    | -0.468195077 | 2.67E-25    |
| RP11-350J20.12 | DENND6A  | -0.649999571 | 4.64E-54    |
| RP11-350J20.12 | CLDN8    | -0.137577101 | 0.00387593  |

|                |          |              |             |
|----------------|----------|--------------|-------------|
| RP11-350J20.12 | UTS2R    | -0.139743403 | 0.003346126 |
| RP11-350J20.12 | SCNN1B   | -0.408900243 | 4.01E-19    |
| RP11-350J20.12 | TTC30A   | -0.612972116 | 1.20E-46    |
| RP11-350J20.12 | CORO2B   | -0.561348054 | 8.18E-38    |
| RP11-350J20.12 | TC2N     | -0.314466534 | 1.56E-11    |
| RP11-350J20.12 | ALDH2    | -0.666320155 | 1.14E-57    |
| RP11-350J20.12 | GPR183   | -0.007028101 | 0.883260645 |
| RP11-350J20.12 | C4orf47  | -0.433479732 | 1.55E-21    |
| RP11-350J20.12 | SLC25A42 | -0.625134561 | 5.69E-49    |
| RP11-350J20.12 | LGMN     | -0.566243328 | 1.38E-38    |
| RP11-350J20.12 | ACSF2    | -0.523596796 | 2.85E-32    |
| RP11-350J20.12 | KIAA1467 | -0.69729777  | 3.48E-65    |
| RP11-350J20.12 | PRKG1    | -0.607249781 | 1.38E-45    |
| RP11-350J20.12 | GNAI1    | -0.577570982 | 2.02E-40    |
| RP11-350J20.12 | ABCC4    | -0.43028418  | 3.27E-21    |
| RP11-350J20.12 | PRPS1    | -0.714189112 | 1.05E-69    |
| RP11-350J20.12 | TSPAN5   | -0.297642849 | 1.97E-10    |
| RP11-350J20.12 | CR2      | -0.200126733 | 2.40E-05    |
| RP11-350J20.12 | CCDC170  | -0.486602744 | 1.78E-27    |
| RP11-350J20.12 | RRAD     | 0.050327658  | 0.292734434 |
| RP11-350J20.12 | SCGB2A1  | -0.361066391 | 5.78E-15    |
| RP11-350J20.12 | SESN3    | -0.372538932 | 6.70E-16    |
| RP11-350J20.12 | SGK223   | -0.271403068 | 7.51E-09    |
| RP11-350J20.12 | NDRG2    | -0.722995585 | 3.41E-72    |
| RP11-350J20.12 | C3orf52  | -0.203378637 | 1.75E-05    |
| RP11-350J20.12 | FLRT3    | 0.391612319  | 1.53E-17    |
| RP11-350J20.12 | MST1R    | 0.653541635  | 7.99E-55    |
| RP11-350J20.12 | SDC1     | 0.380804859  | 1.34E-16    |
| RP11-350J20.12 | ST8SIA4  | 0.472027555  | 9.64E-26    |
| RP11-350J20.12 | UBTD1    | 0.490316078  | 6.23E-28    |
| RP11-350J20.12 | EPHA2    | 0.515882409  | 3.19E-31    |
| RP11-350J20.12 | TMEM130  | 0.306427479  | 5.36E-11    |
| RP11-350J20.12 | SPINK2   | 0.398797861  | 3.46E-18    |
| RP11-350J20.12 | MMP16    | 0.638830847  | 1.02E-51    |
| RP11-350J20.12 | SIGLEC15 | 0.581358781  | 4.74E-41    |
| RP11-350J20.12 | RIN1     | 0.659140712  | 4.71E-56    |
| RP11-350J20.12 | IL1RN    | 0.519895519  | 9.14E-32    |
| RP11-350J20.12 | FCER1G   | 0.313845494  | 1.72E-11    |
| RP11-350J20.12 | CD276    | 0.667775632  | 5.31E-58    |
| RP11-350J20.12 | CTSB     | 0.340313068  | 2.30E-13    |
| RP11-350J20.12 | FAM171A2 | 0.145950541  | 0.00217149  |
| RP11-350J20.12 | ASPHD1   | 0.623896664  | 9.92E-49    |
| RP11-350J20.12 | C15orf48 | 0.452866724  | 1.38E-23    |
| RP11-350J20.12 | DYSF     | 0.098307887  | 0.039504214 |
| RP11-350J20.12 | PDZRN4   | 0.085966088  | 0.071957574 |
| RP11-350J20.12 | EFHD2    | 0.435071586  | 1.06E-21    |
| RP11-350J20.12 | ASF1B    | 0.406199211  | 7.19E-19    |
| RP11-350J20.12 | AQP1     | 0.102434042  | 0.031892172 |
| RP11-350J20.12 | ARRDC2   | 0.607860325  | 1.07E-45    |
| RP11-350J20.12 | PRSS1    | 0.372203537  | 7.15E-16    |
| RP11-350J20.12 | MAPK13   | 0.528834469  | 5.33E-33    |

|                |          |              |             |
|----------------|----------|--------------|-------------|
| RP11-350J20.12 | CST5     | 0.729532122  | 4.19E-74    |
| RP11-350J20.12 | AHR      | 0.480897713  | 8.68E-27    |
| RP11-350J20.12 | BAX      | 0.642455319  | 1.82E-52    |
| RP11-350J20.12 | C1orf115 | 0.183954058  | 0.000106011 |
| RP11-350J20.12 | PLK3     | 0.593639944  | 3.76E-43    |
| RP11-350J20.12 | JAG2     | 0.37344677   | 5.63E-16    |
| RP11-350J20.12 | RAD23B   | 0.410132607  | 3.07E-19    |
| RP11-350J20.12 | CA12     | -0.082456647 | 0.084406346 |
| RP11-350J20.12 | ADTRP    | 0.306402444  | 5.38E-11    |
| RP11-350J20.12 | UCP2     | 0.434169989  | 1.31E-21    |
| RP11-350J20.12 | IGFBP2   | 0.409776309  | 3.32E-19    |
| RP11-350J20.12 | LOXL2    | 0.267713492  | 1.22E-08    |
| RP11-350J20.12 | GPX1     | 0.559746058  | 1.45E-37    |
| RP11-350J20.12 | P3H3     | 0.593781074  | 3.55E-43    |
| RP11-350J20.12 | C2orf81  | 0.421372108  | 2.53E-20    |
| RP11-350J20.12 | CDT1     | 0.498554346  | 5.81E-29    |
| RP11-350J20.12 | SNX25    | 0.343123741  | 1.42E-13    |
| RP11-350J20.12 | MTHFD1L  | 0.652249131  | 1.52E-54    |
| RP11-350J20.12 | CDC42BPG | 0.590099462  | 1.55E-42    |
| RP11-350J20.12 | MSN      | 0.429972773  | 3.52E-21    |
| RP11-350J20.12 | SIGLEC6  | 0.471559831  | 1.09E-25    |
| RP11-350J20.12 | F2R      | 0.293756188  | 3.47E-10    |
| RP11-350J20.12 | TMEM184A | 0.624571249  | 7.33E-49    |
| RP11-350J20.12 | CKS2     | 0.428682539  | 4.74E-21    |
| RP11-350J20.12 | TAX1BP3  | 0.724800977  | 1.02E-72    |
| RP11-350J20.12 | PMEPA1   | 0.493074129  | 2.84E-28    |
| RP11-350J20.12 | CXCL16   | 0.58640873   | 6.65E-42    |
| RP11-350J20.12 | FAXC     | 0.723586059  | 2.30E-72    |
| RP11-350J20.12 | VTCN1    | 0.645802456  | 3.62E-53    |
| RP11-350J20.12 | SH2D4A   | 0.515664333  | 3.41E-31    |
| RP11-350J20.12 | RNF24    | 0.381034283  | 1.28E-16    |
| RP11-350J20.12 | LY6G6C   | 0.572039622  | 1.63E-39    |
| RP11-350J20.12 | NID1     | 0.337111984  | 3.97E-13    |
| RP11-350J20.12 | STAC     | 0.69056065   | 1.81E-63    |
| RP11-350J20.12 | RAB34    | 0.650404946  | 3.80E-54    |
| RP11-350J20.12 | HES4     | 0.508478436  | 3.06E-30    |
| RP11-350J20.12 | EPHA10   | 0.572953144  | 1.16E-39    |
| RP11-350J20.12 | ENTPD2   | 0.451612588  | 1.90E-23    |
| RP11-350J20.12 | DDB2     | 0.609088647  | 6.34E-46    |
| RP11-350J20.12 | NKAIN4   | 0.47863014   | 1.62E-26    |
| RP11-350J20.12 | TRIM29   | 0.586060091  | 7.63E-42    |
| RP11-350J20.12 | ADCY8    | 0.532209959  | 1.78E-33    |
| RP11-350J20.12 | SFTA2    | 0.534001294  | 9.92E-34    |
| RP11-350J20.12 | NRIP1    | 0.412683999  | 1.76E-19    |
| RP11-350J20.12 | VWA1     | 0.226982916  | 1.55E-06    |
| RP11-350J20.12 | APLNR    | 0.139456887  | 0.003412207 |
| RP11-350J20.12 | REN      | 0.502717452  | 1.71E-29    |
| RP11-350J20.12 | EDIL3    | 0.176181943  | 0.000207295 |
| RP11-350J20.12 | AGRN     | 0.472299743  | 8.97E-26    |
| RP11-350J20.12 | TREM1    | 0.572902294  | 1.18E-39    |
| RP11-350J20.12 | SRL      | 0.432016242  | 2.18E-21    |

|                |          |             |             |
|----------------|----------|-------------|-------------|
| RP11-350J20.12 | RASGRF1  | 0.57340724  | 9.74E-40    |
| RP11-350J20.12 | RMI2     | 0.528320304 | 6.29E-33    |
| RP11-350J20.12 | SAMD1    | 0.573635174 | 8.95E-40    |
| RP11-350J20.12 | MGAT4B   | 0.605909903 | 2.43E-45    |
| RP11-350J20.12 | NXN      | 0.681597375 | 2.93E-61    |
| RP11-350J20.12 | SH3BGRL3 | 0.564144614 | 2.98E-38    |
| RP11-350J20.12 | CA11     | 0.284879647 | 1.21E-09    |
| RP11-350J20.12 | PLD3     | 0.330571453 | 1.18E-12    |
| RP11-350J20.12 | LURAP1L  | 0.415985079 | 8.47E-20    |
| RP11-350J20.12 | CARNS1   | 0.296973016 | 2.18E-10    |
| RP11-350J20.12 | PDLIM7   | 0.524758454 | 1.97E-32    |
| RP11-350J20.12 | BCL2L1   | 0.73522441  | 8.17E-76    |
| RP11-350J20.12 | GGT6     | 0.331703183 | 9.81E-13    |
| RP11-350J20.12 | DPYSL3   | 0.511984402 | 1.06E-30    |
| RP11-350J20.12 | FYN      | 0.535810728 | 5.47E-34    |
| RP11-350J20.12 | TK1      | 0.426233767 | 8.35E-21    |
| RP11-350J20.12 | AK1      | 0.328438981 | 1.68E-12    |
| RP11-350J20.12 | HIGD1B   | 0.066994895 | 0.161132891 |
| RP11-350J20.12 | TMEM59L  | 0.549617649 | 5.14E-36    |
| RP11-350J20.12 | MEGF9    | 0.361205038 | 5.64E-15    |
| RP11-350J20.12 | ZFP36L1  | 0.526840361 | 1.01E-32    |
| RP11-350J20.12 | ADRA1B   | 0.32873053  | 1.60E-12    |
| RP11-350J20.12 | EPHA4    | 0.601752543 | 1.37E-44    |
| RP11-350J20.12 | TCERG1L  | 0.397567979 | 4.48E-18    |
| RP11-350J20.12 | NGFR     | 0.221547591 | 2.77E-06    |
| RP11-350J20.12 | EBI3     | 0.532378377 | 1.69E-33    |
| RP11-350J20.12 | S100A10  | 0.644909197 | 5.58E-53    |
| RP11-350J20.12 | S100B    | 0.410281892 | 2.97E-19    |
| RP11-350J20.12 | CD44     | 0.16917994  | 0.000370426 |
| RP11-350J20.12 | BHLHE41  | 0.364900145 | 2.84E-15    |
| RP11-350J20.12 | FBXO2    | 0.418222512 | 5.14E-20    |
| RP11-350J20.12 | SLC30A2  | 0.433014289 | 1.73E-21    |
| RP11-350J20.12 | FRMD5    | 0.478607233 | 1.63E-26    |
| RP11-350J20.12 | SAMD11   | 0.33833754  | 3.22E-13    |
| RP11-350J20.12 | SIPA1L2  | 0.37107913  | 8.86E-16    |
| RP11-350J20.12 | S100A16  | 0.698535311 | 1.66E-65    |
| RP11-350J20.12 | PPL      | 0.593563635 | 3.88E-43    |
| RP11-350J20.12 | ARHGD1B  | 0.389704874 | 2.26E-17    |
| RP11-350J20.12 | CDC42EP3 | 0.610025916 | 4.25E-46    |
| RP11-350J20.12 | RUNX2    | 0.394660714 | 8.19E-18    |
| RP11-350J20.12 | LAMC2    | 0.575710344 | 4.09E-40    |
| RP11-350J20.12 | BRINP1   | 0.386895974 | 3.99E-17    |
| RP11-350J20.12 | GPRC5B   | 0.382396146 | 9.81E-17    |
| RP11-350J20.12 | AQP5     | 0.32830934  | 1.72E-12    |
| RP11-350J20.12 | PLAG1    | 0.326415441 | 2.34E-12    |
| RP11-350J20.12 | PTPRU    | 0.633886355 | 1.04E-50    |
| RP11-350J20.12 | ANGPTL4  | 0.506201076 | 6.06E-30    |
| RP11-350J20.12 | PALM3    | 0.324749901 | 3.06E-12    |
| RP11-350J20.12 | ACP5     | 0.446816671 | 6.23E-23    |
| RP11-350J20.12 | DLG4     | 0.272408349 | 6.58E-09    |
| RP11-350J20.12 | ETNK2    | 0.459697386 | 2.44E-24    |

|                |          |             |             |
|----------------|----------|-------------|-------------|
| RP11-350J20.12 | CD109    | 0.562281139 | 5.85E-38    |
| RP11-350J20.12 | SNX22    | 0.417980606 | 5.43E-20    |
| RP11-350J20.12 | TMEM98   | 0.575326599 | 4.73E-40    |
| RP11-350J20.12 | CTHRC1   | 0.423585712 | 1.53E-20    |
| RP11-350J20.12 | S100A2   | 0.673226842 | 2.90E-59    |
| RP11-350J20.12 | C11orf80 | 0.630297626 | 5.45E-50    |
| RP11-350J20.12 | SREBF1   | 0.646896781 | 2.13E-53    |
| RP11-350J20.12 | PRSS22   | 0.664637666 | 2.76E-57    |
| RP11-350J20.12 | CMTM3    | 0.604414499 | 4.54E-45    |
| RP11-350J20.12 | RDH5     | 0.436505645 | 7.56E-22    |
| RP11-350J20.12 | MYH10    | 0.396126474 | 6.04E-18    |
| RP11-350J20.12 | EVPL     | 0.599118388 | 4.07E-44    |
| RP11-350J20.12 | SCD      | 0.418833552 | 4.48E-20    |
| RP11-350J20.12 | CD151    | 0.598637414 | 4.95E-44    |
| RP11-350J20.12 | S100A4   | 0.555869752 | 5.77E-37    |
| RP11-350J20.12 | BNIP1    | 0.369567556 | 1.18E-15    |
| RP11-350J20.12 | MAP3K6   | 0.557303172 | 3.48E-37    |
| RP11-350J20.12 | MANEAL   | 0.388308686 | 3.00E-17    |
| RP11-350J20.12 | CD207    | 0.399351173 | 3.08E-18    |
| RP11-350J20.12 | CD1A     | 0.434209891 | 1.30E-21    |
| RP11-350J20.12 | C3       | 0.45975788  | 2.41E-24    |
| RP11-350J20.12 | NT5E     | 0.576929588 | 2.58E-40    |
| RP11-350J20.12 | CACNG4   | 0.648566894 | 9.39E-54    |
| RP11-350J20.12 | FHOD1    | 0.581029006 | 5.38E-41    |
| RP11-350J20.12 | LEMD1    | 0.55208791  | 2.18E-36    |
| RP11-350J20.12 | ATP11A   | 0.356675636 | 1.29E-14    |
| RP11-350J20.12 | PPAP2C   | 0.541821138 | 7.36E-35    |
| RP11-350J20.12 | DRAM1    | 0.660634556 | 2.19E-56    |
| RP11-350J20.12 | CDA      | 0.310819014 | 2.75E-11    |
| RP11-350J20.12 | CCND2    | 0.276169766 | 3.99E-09    |
| RP11-350J20.12 | LCN6     | 0.291935133 | 4.50E-10    |
| RP11-350J20.12 | CDH4     | 0.484378999 | 3.31E-27    |
| RP11-350J20.12 | MMP11    | 0.555047513 | 7.72E-37    |
| RP11-350J20.12 | B3GAT1   | 0.488097723 | 1.17E-27    |
| RP11-350J20.12 | SPP1     | 0.30353766  | 8.27E-11    |
| RP11-350J20.12 | HLA-DQB1 | 0.299163925 | 1.58E-10    |
| RP11-350J20.12 | SDC3     | 0.571594472 | 1.92E-39    |
| RP11-350J20.12 | CX3CL1   | 0.553327295 | 1.41E-36    |
| RP11-350J20.12 | SDK1     | 0.505871088 | 6.69E-30    |
| RP11-350J20.12 | DOCK9    | 0.449329554 | 3.35E-23    |
| RP11-350J20.12 | CSF2     | 0.679432396 | 9.76E-61    |
| RP11-350J20.12 | GRHL3    | 0.691583448 | 9.98E-64    |
| RP11-350J20.12 | TMEM92   | 0.668972674 | 2.82E-58    |
| RP11-350J20.12 | BASP1    | 0.722657017 | 4.27E-72    |
| RP11-350J20.12 | HRH1     | 0.659472969 | 3.98E-56    |
| RP11-350J20.12 | ESM1     | 0.160294959 | 0.000749507 |
| RP11-350J20.12 | B4GALNT3 | 0.589659316 | 1.85E-42    |
| RP11-350J20.12 | LMO3     | 0.419009999 | 4.31E-20    |
| RP11-350J20.12 | C9orf16  | 0.599713897 | 3.18E-44    |
| RP11-350J20.12 | SEMA3F   | 0.336891708 | 4.12E-13    |
| RP11-350J20.12 | PLA2G12B | 0.225276183 | 1.86E-06    |

|                |          |             |          |
|----------------|----------|-------------|----------|
| RP11-350J20.12 | KLK6     | 0.541695181 | 7.68E-35 |
| RP11-350J20.12 | ST3GAL5  | 0.419967764 | 3.47E-20 |
| RP11-350J20.12 | FAM132B  | 0.243058899 | 2.53E-07 |
| RP11-350J20.12 | CDKN1A   | 0.489566532 | 7.71E-28 |
| RP11-350J20.12 | E2F1     | 0.485761429 | 2.25E-27 |
| RP11-350J20.12 | B3GNT8   | 0.549607153 | 5.16E-36 |
| RP11-350J20.12 | MTMR11   | 0.553859403 | 1.17E-36 |
| RP11-350J20.12 | MYO1G    | 0.623014287 | 1.47E-48 |
| RP11-350J20.12 | TMSB10   | 0.682280611 | 2.00E-61 |
| RP11-350J20.12 | UNC5CL   | 0.664882621 | 2.43E-57 |
| RP11-350J20.12 | ABR      | 0.50001585  | 3.79E-29 |
| RP11-350J20.12 | PLP2     | 0.615009131 | 4.99E-47 |
| RP11-350J20.12 | SRCIN1   | 0.320405386 | 6.15E-12 |
| RP11-350J20.12 | PDE9A    | 0.74491936  | 7.86E-79 |
| RP11-350J20.12 | TREM2    | 0.36588337  | 2.36E-15 |
| RP11-350J20.12 | KDELR3   | 0.562195681 | 6.03E-38 |
| RP11-350J20.12 | PC       | 0.459674834 | 2.46E-24 |
| RP11-350J20.12 | C2CD4A   | 0.569374202 | 4.38E-39 |
| RP11-350J20.12 | PELI1    | 0.602181889 | 1.15E-44 |
| RP11-350J20.12 | SSX1     | 0.428065541 | 5.47E-21 |
| RP11-350J20.12 | MROH6    | 0.666309021 | 1.15E-57 |
| RP11-350J20.12 | ESPN     | 0.460357574 | 2.06E-24 |
| RP11-350J20.12 | BMP1     | 0.492866336 | 3.01E-28 |
| RP11-350J20.12 | TM4SF4   | 0.532311239 | 1.72E-33 |
| RP11-350J20.12 | CORO2A   | 0.46030871  | 2.09E-24 |
| RP11-350J20.12 | CD164L2  | 0.425471506 | 9.95E-21 |
| RP11-350J20.12 | CTSS     | 0.374765231 | 4.37E-16 |
| RP11-350J20.12 | CLU      | 0.543350016 | 4.39E-35 |
| RP11-350J20.12 | TMSB4X   | 0.641348553 | 3.09E-52 |
| RP11-350J20.12 | WNT10A   | 0.543151106 | 4.70E-35 |
| RP11-350J20.12 | NAPSA    | 0.635671322 | 4.53E-51 |
| RP11-350J20.12 | PLEKHA4  | 0.453502161 | 1.18E-23 |
| RP11-350J20.12 | SFTPA1   | 0.305146252 | 6.50E-11 |
| RP11-350J20.12 | C1orf116 | 0.623861063 | 1.01E-48 |
| RP11-350J20.12 | TM4SF1   | 0.624542668 | 7.42E-49 |
| RP11-350J20.12 | SEL1L3   | 0.5429862   | 4.97E-35 |
| RP11-350J20.12 | VASN     | 0.652861519 | 1.12E-54 |
| RP11-350J20.12 | NPTXR    | 0.525683171 | 1.47E-32 |
| RP11-350J20.12 | PDE4C    | 0.658032386 | 8.29E-56 |
| RP11-350J20.12 | CDC42EP1 | 0.759799928 | 9.75E-84 |
| RP11-350J20.12 | ENDOD1   | 0.544782443 | 2.70E-35 |
| RP11-350J20.12 | RYR1     | 0.612649717 | 1.38E-46 |
| RP11-350J20.12 | IL1RAP   | 0.548191533 | 8.40E-36 |
| RP11-350J20.12 | SLC35F2  | 0.54032554  | 1.22E-34 |
| RP11-350J20.12 | ISYNA1   | 0.50617441  | 6.11E-30 |
| RP11-350J20.12 | HLA-G    | 0.583743229 | 1.88E-41 |
| RP11-350J20.12 | CDKN2B   | 0.593410733 | 4.13E-43 |
| RP11-350J20.12 | ALDH1A3  | 0.615242455 | 4.51E-47 |
| RP11-350J20.12 | CLIP3    | 0.419465869 | 3.89E-20 |
| RP11-350J20.12 | ULBP2    | 0.518359053 | 1.48E-31 |
| RP11-350J20.12 | ETHE1    | 0.713540272 | 1.59E-69 |

|                |          |             |             |
|----------------|----------|-------------|-------------|
| RP11-350J20.12 | XPR1     | 0.53077709  | 2.84E-33    |
| RP11-350J20.12 | SPTBN2   | 0.523278865 | 3.15E-32    |
| RP11-350J20.12 | IVL      | 0.593050564 | 4.77E-43    |
| RP11-350J20.12 | MARCO    | 0.507214442 | 4.47E-30    |
| RP11-350J20.12 | PLXND1   | 0.316624963 | 1.12E-11    |
| RP11-350J20.12 | EMILIN2  | 0.53326352  | 1.26E-33    |
| RP11-350J20.12 | PLAUR    | 0.661810681 | 1.20E-56    |
| RP11-350J20.12 | CDC42EP5 | 0.717753799 | 1.06E-70    |
| RP11-350J20.12 | TRPC5    | 0.222874028 | 2.41E-06    |
| RP11-350J20.12 | TMEM100  | 0.446576255 | 6.61E-23    |
| RP11-350J20.12 | QSOX1    | 0.654709108 | 4.45E-55    |
| RP11-350J20.12 | ARHGAP23 | 0.530877938 | 2.75E-33    |
| RP11-350J20.12 | MDF1     | 0.612422137 | 1.53E-46    |
| RP11-350J20.12 | FSTL3    | 0.729366974 | 4.69E-74    |
| RP11-350J20.12 | INF2     | 0.439029166 | 4.14E-22    |
| RP11-350J20.12 | TGFBR1   | 0.475269204 | 4.03E-26    |
| RP11-350J20.12 | TGFBI    | 0.289642941 | 6.23E-10    |
| RP11-350J20.12 | ERBB3    | 0.636221798 | 3.50E-51    |
| RP11-350J20.12 | CCL18    | 0.473437785 | 6.61E-26    |
| RP11-350J20.12 | CCL17    | 0.529504675 | 4.29E-33    |
| RP11-350J20.12 | C16orf45 | 0.419621182 | 3.76E-20    |
| RP11-350J20.12 | PRDM1    | 0.335775439 | 4.97E-13    |
| RP11-350J20.12 | TRIM47   | 0.667773575 | 5.32E-58    |
| RP11-350J20.12 | CNFN     | 0.557301683 | 3.48E-37    |
| RP11-350J20.12 | ARMCX3   | 0.292182206 | 4.34E-10    |
| RP11-350J20.12 | RAMP1    | 0.448987794 | 3.65E-23    |
| RP11-350J20.12 | GABRD    | 0.175476438 | 0.000220003 |
| RP11-350J20.12 | COL13A1  | 0.306474214 | 5.32E-11    |
| RP11-350J20.12 | S100A5   | 0.527002908 | 9.61E-33    |
| RP11-350J20.12 | MISP     | 0.655362275 | 3.20E-55    |
| RP11-350J20.12 | HES6     | 0.413478153 | 1.47E-19    |
| RP11-350J20.12 | PSD3     | 0.369257426 | 1.25E-15    |
| RP11-350J20.12 | DOK7     | 0.64835396  | 1.04E-53    |
| RP11-350J20.12 | ZMAT3    | 0.517706311 | 1.81E-31    |
| RP11-350J20.12 | MFAP2    | 0.463362495 | 9.48E-25    |
| RP11-350J20.12 | TMEM79   | 0.540226305 | 1.26E-34    |
| RP11-350J20.12 | SLC1A5   | 0.475964071 | 3.34E-26    |
| RP11-350J20.12 | BBC3     | 0.657344185 | 1.18E-55    |
| RP11-350J20.12 | HLA-DQB2 | 0.35364568  | 2.23E-14    |
| RP11-350J20.12 | C1QL1    | 0.432792311 | 1.82E-21    |
| RP11-350J20.12 | TMEM215  | 0.282711605 | 1.64E-09    |
| RP11-350J20.12 | PNP      | 0.505253807 | 8.04E-30    |
| RP11-350J20.12 | ARNTL    | 0.569650574 | 3.95E-39    |
| RP11-350J20.12 | CLDN2    | 0.245658986 | 1.86E-07    |
| RP11-350J20.12 | MVP      | 0.643455494 | 1.13E-52    |
| RP11-350J20.12 | LGALS1   | 0.609465583 | 5.40E-46    |
| RP11-350J20.12 | BIRC7    | 0.54991661  | 4.63E-36    |
| RP11-350J20.12 | COL8A1   | 0.470677819 | 1.38E-25    |
| RP11-350J20.12 | PERP     | 0.729102729 | 5.62E-74    |
| RP11-350J20.12 | GJA4     | 0.354878045 | 1.79E-14    |
| RP11-350J20.12 | IGFL2    | 0.556432143 | 4.73E-37    |



|                |           |             |          |
|----------------|-----------|-------------|----------|
| RP11-350J20.12 | DAPK2     | 0.606019969 | 2.32E-45 |
| RP11-350J20.12 | MAMLD1    | 0.575312132 | 4.76E-40 |
| RP11-350J20.12 | ETV5      | 0.27453919  | 4.96E-09 |
| RP11-350J20.12 | RUNX1     | 0.638702696 | 1.09E-51 |
| RP11-350J20.12 | LONRF2    | 0.281829692 | 1.85E-09 |
| RP11-350J20.12 | SPOCK1    | 0.257054607 | 4.69E-08 |
| RP11-350J20.12 | XKRX      | 0.520922785 | 6.62E-32 |
| RP11-350J20.12 | TGFB1     | 0.430333327 | 3.23E-21 |
| RP11-350J20.12 | ERP27     | 0.419089145 | 4.23E-20 |
| RP11-350J20.12 | TNFRSF10C | 0.445509487 | 8.59E-23 |
| RP11-350J20.12 | PALM      | 0.664328316 | 3.24E-57 |
| RP11-350J20.12 | TSC22D1   | 0.377652355 | 2.49E-16 |
| RP11-350J20.12 | TGM2      | 0.583154244 | 2.37E-41 |
| RP11-350J20.12 | UBE2QL1   | 0.259574015 | 3.43E-08 |
| RP11-350J20.12 | ECE1      | 0.609779684 | 4.72E-46 |
| RP11-350J20.12 | COL8A2    | 0.660153865 | 2.81E-56 |
| RP11-350J20.12 | HIST3H2A  | 0.487606394 | 1.34E-27 |
| RP11-350J20.12 | TNFRSF21  | 0.585733082 | 8.67E-42 |
| RP11-350J20.12 | SOX4      | 0.671473576 | 7.43E-59 |
| RP11-350J20.12 | ELF3      | 0.733473839 | 2.77E-75 |
| RP11-350J20.12 | TPD52L1   | 0.473310626 | 6.84E-26 |
| RP11-350J20.12 | INHBB     | 0.492948389 | 2.94E-28 |
| RP11-350J20.12 | HPN       | 0.499739549 | 4.11E-29 |
| RP11-350J20.12 | MMP7      | 0.521070693 | 6.32E-32 |
| RP11-350J20.12 | RAB27A    | 0.517888432 | 1.71E-31 |
| RP11-350J20.12 | IGF2BP2   | 0.480393477 | 9.98E-27 |
| RP11-350J20.12 | ITGB4     | 0.698242485 | 1.98E-65 |
| RP11-350J20.12 | PPP1R1B   | 0.586240935 | 7.10E-42 |
| RP11-350J20.12 | NPDC1     | 0.470938447 | 1.29E-25 |
| RP11-350J20.12 | CCL13     | 0.574872601 | 5.62E-40 |
| RP11-350J20.12 | SPINT1    | 0.695905269 | 7.93E-65 |
| RP11-350J20.12 | HEY2      | 0.344310929 | 1.16E-13 |
| RP11-350J20.12 | CST2      | 0.696194546 | 6.69E-65 |
| RP11-350J20.12 | ADM       | 0.258958223 | 3.70E-08 |
| RP11-350J20.12 | VSTM2L    | 0.55398727  | 1.12E-36 |
| RP11-350J20.12 | FAM84A    | 0.64535145  | 4.51E-53 |
| RP11-350J20.12 | P4HA2     | 0.361720479 | 5.13E-15 |
| RP11-350J20.12 | LPL       | 0.496212236 | 1.15E-28 |
| RP11-350J20.12 | TMEM173   | 0.579512539 | 9.63E-41 |
| RP11-350J20.12 | DHRS3     | 0.636348247 | 3.30E-51 |
| RP11-350J20.12 | SCN1B     | 0.582180664 | 3.45E-41 |
| RP11-350J20.12 | GLT1D1    | 0.332508329 | 8.59E-13 |
| RP11-350J20.12 | PHYHIP    | 0.482340353 | 5.83E-27 |
| RP11-350J20.12 | BHLHE40   | 0.570227645 | 3.19E-39 |
| RP11-350J20.12 | BID       | 0.682799598 | 1.50E-61 |
| RP11-350J20.12 | POSTN     | 0.364945746 | 2.82E-15 |
| RP11-350J20.12 | ITGA3     | 0.676765218 | 4.23E-60 |
| RP11-350J20.12 | RSP04     | 0.574880659 | 5.60E-40 |
| RP11-350J20.12 | ADAMTS9   | 0.210794312 | 8.42E-06 |
| RP11-350J20.12 | ABTB2     | 0.603992032 | 5.42E-45 |
| RP11-350J20.12 | KCNQ3     | 0.673363007 | 2.69E-59 |

|                |            |             |             |
|----------------|------------|-------------|-------------|
| RP11-350J20.12 | ANXA1      | 0.576333369 | 3.23E-40    |
| RP11-350J20.12 | S100A11    | 0.729417752 | 4.53E-74    |
| RP11-350J20.12 | CEACAM6    | 0.687787512 | 8.90E-63    |
| RP11-350J20.12 | IER5L      | 0.566504453 | 1.26E-38    |
| RP11-350J20.12 | KRT80      | 0.613850735 | 8.24E-47    |
| RP11-350J20.12 | CDH6       | 0.667142464 | 7.42E-58    |
| RP11-350J20.12 | UNC5B      | 0.30824748  | 4.07E-11    |
| RP11-350J20.12 | PLEKHN1    | 0.689965638 | 2.55E-63    |
| RP11-350J20.12 | SYTL1      | 0.661326303 | 1.54E-56    |
| RP11-350J20.12 | TMEM163    | 0.687075677 | 1.34E-62    |
| RP11-350J20.12 | C4orf48    | 0.421254666 | 2.60E-20    |
| RP11-350J20.12 | B3GNT7     | 0.366146481 | 2.25E-15    |
| RP11-350J20.12 | BAIAP3     | 0.543267111 | 4.52E-35    |
| RP11-350J20.12 | PHLDA2     | 0.586363413 | 6.77E-42    |
| RP11-350J20.12 | GAP43      | 0.616442962 | 2.67E-47    |
| RP11-350J20.12 | S100A1     | 0.475470331 | 3.82E-26    |
| RP11-350J20.12 | PTPRE      | 0.642997994 | 1.40E-52    |
| RP11-350J20.12 | CCND1      | 0.582239953 | 3.37E-41    |
| RP11-350J20.12 | ST6GALNAC5 | 0.70500131  | 3.31E-67    |
| RP11-350J20.12 | KRT17      | 0.522287414 | 4.31E-32    |
| RP11-350J20.12 | HPCAL4     | 0.382456356 | 9.69E-17    |
| RP11-350J20.12 | GABBR2     | 0.293316418 | 3.69E-10    |
| RP11-350J20.12 | DIRAS3     | 0.318099445 | 8.86E-12    |
| RP11-350J20.12 | SERINC2    | 0.561399612 | 8.03E-38    |
| RP11-350J20.12 | PTCHD4     | 0.54028226  | 1.23E-34    |
| RP11-350J20.12 | EPS8       | 0.343390468 | 1.36E-13    |
| RP11-350J20.12 | LY6E       | 0.569319381 | 4.47E-39    |
| RP11-350J20.12 | UPP1       | 0.798570437 | 2.14E-98    |
| RP11-350J20.12 | AHNAK2     | 0.651524336 | 2.18E-54    |
| RP11-350J20.12 | PLXNC1     | 0.313198356 | 1.90E-11    |
| RP11-350J20.12 | TNC        | 0.457801643 | 3.97E-24    |
| RP11-350J20.12 | DUSP4      | 0.47743976  | 2.24E-26    |
| RP11-350J20.12 | NRCAM      | 0.402747073 | 1.50E-18    |
| RP11-350J20.12 | NRP2       | 0.427227488 | 6.64E-21    |
| RP11-350J20.12 | CTSC       | 0.625483909 | 4.86E-49    |
| RP11-350J20.12 | AMIGO2     | 0.549437727 | 5.47E-36    |
| RP11-350J20.12 | NAB2       | 0.458540976 | 3.29E-24    |
| RP11-350J20.12 | TBC1D2     | 0.699170535 | 1.14E-65    |
| RP11-350J20.12 | PHLDA3     | 0.643028914 | 1.38E-52    |
| RP11-350J20.12 | PTP4A3     | 0.515193428 | 3.94E-31    |
| RP11-350J20.12 | CRABP2     | 0.363788769 | 3.50E-15    |
| RP11-350J20.12 | GOS2       | 0.385041009 | 5.79E-17    |
| RP11-350J20.12 | S100A6     | 0.759212078 | 1.55E-83    |
| RP11-350J20.12 | FOXQ1      | 0.730893866 | 1.65E-74    |
| RP11-350J20.12 | LRG1       | 0.619970786 | 5.69E-48    |
| RP11-350J20.12 | LAMP5      | 0.470501372 | 1.45E-25    |
| RP11-350J20.12 | ALDH3B1    | 0.695764211 | 8.62E-65    |
| RP11-350J20.12 | CDH2       | 0.090028273 | 0.059463253 |
| RP11-350J20.12 | SCG5       | 0.23875034  | 4.16E-07    |
| RP11-350J20.12 | ZCCHC16    | 0.2331577   | 7.83E-07    |
| RP11-350J20.12 | GRB7       | 0.736020125 | 4.67E-76    |

|                |         |             |          |
|----------------|---------|-------------|----------|
| RP11-350J20.12 | TIAM1   | 0.528826881 | 5.34E-33 |
| RP11-350J20.12 | FXYD5   | 0.495602827 | 1.37E-28 |
| RP11-350J20.12 | CLDN9   | 0.486511117 | 1.82E-27 |
| RP11-350J20.12 | FAM43A  | 0.478838927 | 1.53E-26 |
| RP11-350J20.12 | CHST2   | 0.645329252 | 4.55E-53 |
| RP11-350J20.12 | HMGA2   | 0.460986273 | 1.75E-24 |
| RP11-350J20.12 | GALNT7  | 0.387894872 | 3.26E-17 |
| RP11-350J20.12 | CBLN1   | 0.658243725 | 7.45E-56 |
| RP11-350J20.12 | STRA6   | 0.64061773  | 4.38E-52 |
| RP11-350J20.12 | MUC21   | 0.595577419 | 1.72E-43 |
| RP11-350J20.12 | PRR36   | 0.552082094 | 2.18E-36 |
| RP11-350J20.12 | NFE2L3  | 0.588727436 | 2.67E-42 |
| RP11-350J20.12 | NR1D1   | 0.451448622 | 1.98E-23 |
| RP11-350J20.12 | MUC1    | 0.685323048 | 3.62E-62 |
| RP11-350J20.12 | NAT8L   | 0.230696604 | 1.03E-06 |
| RP11-350J20.12 | APOC1   | 0.349076705 | 5.02E-14 |
| RP11-350J20.12 | EVA1A   | 0.795663101 | 3.46E-97 |
| RP11-350J20.12 | ENTPD1  | 0.387623252 | 3.45E-17 |
| RP11-350J20.12 | COL1A1  | 0.484447365 | 3.25E-27 |
| RP11-350J20.12 | FNDC4   | 0.616851401 | 2.24E-47 |
| RP11-350J20.12 | FRMD3   | 0.185865545 | 8.95E-05 |
| RP11-350J20.12 | SHROOM4 | 0.504467454 | 1.02E-29 |
| RP11-350J20.12 | NELL2   | 0.380256156 | 1.50E-16 |
| RP11-350J20.12 | EPHB3   | 0.679588515 | 8.96E-61 |
| RP11-350J20.12 | TMC6    | 0.652876979 | 1.11E-54 |
| RP11-350J20.12 | NOD1    | 0.561692367 | 7.23E-38 |
| RP11-350J20.12 | GGCT    | 0.5973264   | 8.46E-44 |
| RP11-350J20.12 | ICAM1   | 0.618284112 | 1.20E-47 |
| RP11-350J20.12 | PRSS23  | 0.625456818 | 4.92E-49 |
| RP11-350J20.12 | CFI     | 0.589414502 | 2.03E-42 |
| RP11-350J20.12 | CD55    | 0.759460083 | 1.27E-83 |
| RP11-350J20.12 | RASD2   | 0.589454359 | 2.00E-42 |
| RP11-350J20.12 | KLK11   | 0.458157706 | 3.62E-24 |
| RP11-350J20.12 | ICAM5   | 0.630240891 | 5.59E-50 |
| RP11-350J20.12 | ADORA1  | 0.424010305 | 1.39E-20 |
| RP11-350J20.12 | ITGA2   | 0.663086448 | 6.18E-57 |
| RP11-350J20.12 | ABCC3   | 0.472157621 | 9.31E-26 |
| RP11-350J20.12 | MFGE8   | 0.534172493 | 9.38E-34 |
| RP11-350J20.12 | STK32A  | 0.407406753 | 5.54E-19 |
| RP11-350J20.12 | CYSLTR2 | 0.473997196 | 5.69E-26 |
| RP11-350J20.12 | LAD1    | 0.57321824  | 1.05E-39 |
| RP11-350J20.12 | MGAT3   | 0.681478443 | 3.14E-61 |
| RP11-350J20.12 | IGFBP6  | 0.569871204 | 3.64E-39 |
| RP11-350J20.12 | CYP2S1  | 0.731069675 | 1.46E-74 |
| RP11-350J20.12 | KCNJ2   | 0.462884782 | 1.07E-24 |
| RP11-350J20.12 | FAM20A  | 0.614488228 | 6.25E-47 |
| RP11-350J20.12 | TGFA    | 0.423586846 | 1.53E-20 |
| RP11-350J20.12 | MXRA8   | 0.724326882 | 1.41E-72 |
| RP11-350J20.12 | C8orf4  | 0.554838727 | 8.31E-37 |
| RP11-350J20.12 | CLDN10  | 0.613053578 | 1.16E-46 |
| RP11-350J20.12 | PDE5A   | 0.430851322 | 2.86E-21 |

|                |           |             |             |
|----------------|-----------|-------------|-------------|
| RP11-350J20.12 | APOE      | 0.298195594 | 1.82E-10    |
| RP11-350J20.12 | SPOCK2    | 0.643858528 | 9.27E-53    |
| RP11-350J20.12 | TENM1     | 0.291098559 | 5.07E-10    |
| RP11-350J20.12 | SLIT1     | 0.318757789 | 7.98E-12    |
| RP11-350J20.12 | CXCL14    | 0.472874544 | 7.69E-26    |
| RP11-350J20.12 | ECM1      | 0.322121278 | 4.67E-12    |
| RP11-350J20.12 | DUSP5     | 0.721943143 | 6.84E-72    |
| RP11-350J20.12 | SEZ6L2    | 0.521899201 | 4.87E-32    |
| RP11-350J20.12 | THRSP     | 0.150588662 | 0.001554834 |
| RP11-350J20.12 | C19orf33  | 0.755386125 | 3.03E-82    |
| RP11-350J20.12 | MPZL2     | 0.6001731   | 2.64E-44    |
| RP11-350J20.12 | CTSH      | 0.53132019  | 2.38E-33    |
| RP11-350J20.12 | CYP1B1    | 0.392456968 | 1.29E-17    |
| RP11-350J20.12 | ALOX5     | 0.625285122 | 5.32E-49    |
| RP11-350J20.12 | SYTL5     | 0.618570223 | 1.05E-47    |
| RP11-350J20.12 | TNFRSF12A | 0.602840161 | 8.75E-45    |
| RP11-350J20.12 | DUSP6     | 0.639047506 | 9.24E-52    |
| RP11-350J20.12 | ALOX15B   | 0.67351747  | 2.47E-59    |
| RP11-350J20.12 | SDC4      | 0.62183653  | 2.49E-48    |
| RP11-350J20.12 | MDK       | 0.642574747 | 1.72E-52    |
| RP11-350J20.12 | KRT19     | 0.793802676 | 2.00E-96    |
| RP11-350J20.12 | MET       | 0.617320035 | 1.82E-47    |
| RP11-350J20.12 | TESC      | 0.358818037 | 8.74E-15    |
| RP11-350J20.12 | CXCL17    | 0.567814352 | 7.78E-39    |
| RP11-350J20.12 | NPC2      | 0.454886293 | 8.33E-24    |
| RP11-350J20.12 | COMP      | 0.560675171 | 1.04E-37    |
| RP11-350J20.12 | TUSC3     | 0.521940476 | 4.81E-32    |
| RP11-350J20.12 | TMPRSS4   | 0.779882568 | 5.88E-91    |
| RP11-350J20.12 | LGALS3    | 0.733880206 | 2.09E-75    |
| RP11-350J20.12 | CRLF1     | 0.61595491  | 3.31E-47    |
| RP11-350J20.12 | CTXN1     | 0.694265757 | 2.08E-64    |
| RP11-350J20.12 | PCSK1N    | 0.468642435 | 2.37E-25    |
| RP11-350J20.12 | NMU       | 0.621468263 | 2.93E-48    |
| RP11-350J20.12 | GALE      | 0.629744172 | 7.02E-50    |
| RP11-350J20.12 | PCSK2     | 0.435461642 | 9.68E-22    |
| RP11-350J20.12 | GJB3      | 0.553935854 | 1.14E-36    |
| RP11-350J20.12 | SLPI      | 0.698884305 | 1.35E-65    |
| RP11-350J20.12 | AGR2      | 0.559148279 | 1.80E-37    |
| RP11-350J20.12 | MRC2      | 0.572543727 | 1.35E-39    |
| RP11-350J20.12 | GOLT1A    | 0.566885502 | 1.09E-38    |
| RP11-350J20.12 | SLC27A6   | 0.652152526 | 1.60E-54    |
| RP11-350J20.12 | KCNN4     | 0.706322745 | 1.47E-67    |
| RP11-350J20.12 | ETV4      | 0.610027001 | 4.25E-46    |
| RP11-350J20.12 | SYT12     | 0.569388953 | 4.35E-39    |
| RP11-350J20.12 | PVRL4     | 0.639008217 | 9.41E-52    |
| RP11-350J20.12 | PLCD3     | 0.583282537 | 2.25E-41    |
| RP11-350J20.12 | PLAU      | 0.563545133 | 3.70E-38    |
| RP11-350J20.12 | LRRK2     | 0.220122397 | 3.22E-06    |
| RP11-350J20.12 | SFN       | 0.718256475 | 7.66E-71    |
| RP11-350J20.12 | LPAR5     | 0.553799334 | 1.20E-36    |
| RP11-350J20.12 | NGEF      | 0.661664942 | 1.29E-56    |

|                |          |              |          |
|----------------|----------|--------------|----------|
| RP11-350J20.12 | DTX4     | 0.599506388  | 3.47E-44 |
| RP11-350J20.12 | CST6     | 0.678523236  | 1.61E-60 |
| RP11-350J20.12 | QPCT     | 0.471962167  | 9.81E-26 |
| RP11-350J20.12 | TIMP1    | 0.574643576  | 6.12E-40 |
| RP11-350J20.12 | CAMK2N1  | 0.515878651  | 3.19E-31 |
| RP11-350J20.12 | KLHDC8A  | 0.413581483  | 1.44E-19 |
| RP11-350J20.12 | PDLIM4   | 0.678601815  | 1.54E-60 |
| RP11-350J20.12 | SCEL     | 0.595648733  | 1.67E-43 |
| RP11-350J20.12 | LCN2     | 0.652688617  | 1.22E-54 |
| RP11-350J20.12 | PROS1    | 0.582649725  | 2.88E-41 |
| RP11-350J20.12 | GABRB2   | 0.582703836  | 2.82E-41 |
| RP11-350J20.12 | TMPRSS6  | 0.759863968  | 9.27E-84 |
| RP11-350J20.12 | KLK7     | 0.493015252  | 2.88E-28 |
| RP11-350J20.12 | PDZK1IP1 | 0.553582179  | 1.29E-36 |
| RP11-350J20.12 | CDH3     | 0.577279007  | 2.26E-40 |
| RP11-350J20.12 | LRP4     | 0.319378546  | 7.23E-12 |
| RP11-350J20.12 | IGSF1    | 0.568336653  | 6.42E-39 |
| RP11-350J20.12 | B3GNT3   | 0.729213434  | 5.21E-74 |
| RP11-350J20.12 | CLDN1    | 0.631608286  | 2.98E-50 |
| RP11-350J20.12 | GDF15    | 0.641523156  | 2.84E-52 |
| RP11-350J20.12 | ARHGAP36 | 0.553526026  | 1.32E-36 |
| RP11-350J20.12 | LAMB3    | 0.67517386   | 1.01E-59 |
| RP11-350J20.12 | KLK10    | 0.612723544  | 1.34E-46 |
| RP11-350J20.12 | DPP4     | 0.604777393  | 3.90E-45 |
| RP11-350J20.12 | METTL7B  | 0.427326491  | 6.49E-21 |
| RP11-350J20.12 | LIPH     | 0.66543955   | 1.81E-57 |
| RP11-350J20.12 | CLDN16   | 0.510728138  | 1.55E-30 |
| RP11-350J20.12 | CHI3L1   | 0.460875213  | 1.80E-24 |
| RP11-350J20.12 | SLC22A31 | 0.679370821  | 1.01E-60 |
| RP11-350J20.12 | TACSTD2  | 0.649027197  | 7.49E-54 |
| RP11-350J20.12 | SFTPB    | 0.67626928   | 5.55E-60 |
| RP11-350J20.12 | RXRG     | 0.378573738  | 2.08E-16 |
| RP11-350J20.12 | DCSTAMP  | 0.5499958    | 4.51E-36 |
| RP11-350J20.12 | CITED1   | 0.346822749  | 7.46E-14 |
| RP11-350J20.12 | SERPINA1 | 0.63062577   | 4.69E-50 |
| RP11-350J20.12 | PRR15    | 0.492471953  | 3.37E-28 |
| RP11-350J20.12 | SLC34A2  | 0.60146837   | 1.54E-44 |
| RP11-350J20.12 | FN1      | 0.633029579  | 1.55E-50 |
| RP11-350J20.12 | ZCCHC12  | 0.45689884   | 5.00E-24 |
| AC007255.8     | TFF3     | -0.334466271 | 6.19E-13 |
| AC007255.8     | CCL21    | -0.241086985 | 3.18E-07 |
| AC007255.8     | TPO      | -0.407622408 | 5.29E-19 |
| AC007255.8     | MT1G     | -0.420373298 | 3.17E-20 |
| AC007255.8     | DI01     | -0.364460181 | 3.08E-15 |
| AC007255.8     | DPT      | -0.267039108 | 1.33E-08 |
| AC007255.8     | CDH16    | -0.44634839  | 6.99E-23 |
| AC007255.8     | CRABP1   | -0.358657445 | 9.00E-15 |
| AC007255.8     | SLC26A7  | -0.352129483 | 2.92E-14 |
| AC007255.8     | MT1H     | -0.438784907 | 4.39E-22 |
| AC007255.8     | SLC26A4  | -0.298565192 | 1.73E-10 |
| AC007255.8     | SLC5A8   | -0.476960642 | 2.55E-26 |

|            |           |              |             |
|------------|-----------|--------------|-------------|
| AC007255.8 | PKHD1L1   | -0.365367005 | 2.60E-15    |
| AC007255.8 | TFCP2L1   | -0.476212377 | 3.12E-26    |
| AC007255.8 | WSCD2     | -0.313949303 | 1.70E-11    |
| AC007255.8 | IPCEF1    | -0.344784509 | 1.07E-13    |
| AC007255.8 | SLC5A5    | -0.336809934 | 4.18E-13    |
| AC007255.8 | MT1F      | -0.422803822 | 1.83E-20    |
| AC007255.8 | FOSB      | -0.113556721 | 0.017303352 |
| AC007255.8 | SEMA3D    | -0.364927547 | 2.83E-15    |
| AC007255.8 | BMP8A     | -0.253782047 | 7.02E-08    |
| AC007255.8 | MATN2     | -0.409652171 | 3.41E-19    |
| AC007255.8 | PLA2R1    | -0.353970673 | 2.10E-14    |
| AC007255.8 | COL23A1   | -0.42322905  | 1.66E-20    |
| AC007255.8 | HGD       | -0.419356395 | 3.99E-20    |
| AC007255.8 | TCEAL2    | -0.320338282 | 6.21E-12    |
| AC007255.8 | CHRD1     | -0.194558029 | 4.06E-05    |
| AC007255.8 | TNFRSF11B | -0.390074864 | 2.10E-17    |
| AC007255.8 | FAM167A   | -0.314361896 | 1.59E-11    |
| AC007255.8 | KIT       | -0.308426714 | 3.96E-11    |
| AC007255.8 | SLC4A4    | -0.463565169 | 8.99E-25    |
| AC007255.8 | SMOC2     | -0.196891245 | 3.26E-05    |
| AC007255.8 | FHL1      | -0.301069967 | 1.19E-10    |
| AC007255.8 | OTOS      | -0.442260993 | 1.90E-22    |
| AC007255.8 | IGFBPL1   | -0.405911411 | 7.65E-19    |
| AC007255.8 | HBB       | -0.238497659 | 4.28E-07    |
| AC007255.8 | BEX1      | -0.178702455 | 0.000167286 |
| AC007255.8 | FABP4     | -0.294274087 | 3.22E-10    |
| AC007255.8 | LMOD1     | -0.267596647 | 1.23E-08    |
| AC007255.8 | SOD3      | -0.435834416 | 8.86E-22    |
| AC007255.8 | TMEM171   | -0.48145752  | 7.44E-27    |
| AC007255.8 | PI16      | -0.166875563 | 0.000446235 |
| AC007255.8 | ZMAT4     | -0.409487896 | 3.53E-19    |
| AC007255.8 | MFAP4     | -0.100603216 | 0.035099355 |
| AC007255.8 | CWH43     | -0.506020852 | 6.40E-30    |
| AC007255.8 | SPX       | -0.341078229 | 2.02E-13    |
| AC007255.8 | APOD      | -0.137201568 | 0.003975139 |
| AC007255.8 | DPP6      | -0.363847018 | 3.46E-15    |
| AC007255.8 | MMRN1     | -0.277364273 | 3.40E-09    |
| AC007255.8 | WDR72     | -0.423404716 | 1.60E-20    |
| AC007255.8 | MPPED2    | -0.343612082 | 1.31E-13    |
| AC007255.8 | PAPSS2    | -0.369913612 | 1.11E-15    |
| AC007255.8 | DCN       | -0.201097998 | 2.19E-05    |
| AC007255.8 | SORBS2    | -0.349778033 | 4.44E-14    |
| AC007255.8 | EGR2      | -0.015666356 | 0.743417674 |
| AC007255.8 | EDN3      | -0.11483979  | 0.016072295 |
| AC007255.8 | DIO2      | -0.3762514   | 3.28E-16    |
| AC007255.8 | ITPR1     | -0.291634099 | 4.70E-10    |
| AC007255.8 | CFD       | -0.239552078 | 3.79E-07    |
| AC007255.8 | CPXM1     | -0.228019144 | 1.38E-06    |
| AC007255.8 | ELM01     | -0.329325732 | 1.45E-12    |
| AC007255.8 | GPC3      | -0.279392273 | 2.58E-09    |
| AC007255.8 | MYOC      | 0.003307716  | 0.944904492 |

|            |            |              |             |
|------------|------------|--------------|-------------|
| AC007255.8 | DEPTOR     | -0.418030571 | 5.37E-20    |
| AC007255.8 | DGKI       | -0.322091675 | 4.70E-12    |
| AC007255.8 | CARTPT     | -0.273011972 | 6.07E-09    |
| AC007255.8 | IYD        | -0.46267741  | 1.13E-24    |
| AC007255.8 | LYVE1      | -0.20822433  | 1.09E-05    |
| AC007255.8 | CLCNKB     | -0.286583769 | 9.58E-10    |
| AC007255.8 | NCAM1      | -0.60586054  | 2.48E-45    |
| AC007255.8 | HBA2       | -0.213589184 | 6.34E-06    |
| AC007255.8 | GLT8D2     | -0.281298272 | 1.99E-09    |
| AC007255.8 | OGDHL      | -0.62224126  | 2.08E-48    |
| AC007255.8 | LIFR       | -0.324214837 | 3.34E-12    |
| AC007255.8 | CSGALNACT1 | -0.354857795 | 1.79E-14    |
| AC007255.8 | RAP1GAP    | -0.492619052 | 3.23E-28    |
| AC007255.8 | COL9A3     | -0.261533385 | 2.68E-08    |
| AC007255.8 | FBLN1      | -0.253118178 | 7.61E-08    |
| AC007255.8 | EFEMP1     | -0.323753086 | 3.60E-12    |
| AC007255.8 | AOX1       | -0.367403247 | 1.78E-15    |
| AC007255.8 | GRIN2C     | -0.332176307 | 9.07E-13    |
| AC007255.8 | C11orf74   | -0.431498875 | 2.46E-21    |
| AC007255.8 | PPARGC1A   | -0.62360148  | 1.13E-48    |
| AC007255.8 | ANGPTL1    | -0.128929474 | 0.006831082 |
| AC007255.8 | SCARA5     | -0.228901343 | 1.25E-06    |
| AC007255.8 | LTF        | -0.30429166  | 7.39E-11    |
| AC007255.8 | CA4        | -0.132683884 | 0.005362177 |
| AC007255.8 | TG         | -0.197714824 | 3.02E-05    |
| AC007255.8 | FCGBP      | -0.354228675 | 2.01E-14    |
| AC007255.8 | PBX4       | -0.265234701 | 1.67E-08    |
| AC007255.8 | CYR61      | -0.170718362 | 0.000326692 |
| AC007255.8 | FOS        | -0.157397498 | 0.000935997 |
| AC007255.8 | KHDRBS2    | -0.292259034 | 4.30E-10    |
| AC007255.8 | MUM1L1     | -0.374433116 | 4.66E-16    |
| AC007255.8 | RGS16      | -0.372969071 | 6.17E-16    |
| AC007255.8 | MT1M       | -0.372919216 | 6.23E-16    |
| AC007255.8 | LRP2       | -0.364234872 | 3.22E-15    |
| AC007255.8 | MAFB       | -0.369522212 | 1.19E-15    |
| AC007255.8 | KCNK2      | -0.345857083 | 8.84E-14    |
| AC007255.8 | TBC1D4     | -0.266896325 | 1.35E-08    |
| AC007255.8 | MIOX       | -0.329933091 | 1.31E-12    |
| AC007255.8 | TPPP       | -0.394496642 | 8.47E-18    |
| AC007255.8 | FMOD       | -0.458149183 | 3.63E-24    |
| AC007255.8 | CITED2     | -0.406697416 | 6.46E-19    |
| AC007255.8 | RGS8       | -0.312305618 | 2.19E-11    |
| AC007255.8 | ABI3BP     | -0.396449458 | 5.65E-18    |
| AC007255.8 | ADH1B      | -0.208112053 | 1.10E-05    |
| AC007255.8 | OGN        | -0.21794068  | 4.05E-06    |
| AC007255.8 | NR4A1      | -0.084519078 | 0.076895746 |
| AC007255.8 | FOXJ1      | -0.178652962 | 0.000167996 |
| AC007255.8 | ALDH1A1    | -0.337328973 | 3.83E-13    |
| AC007255.8 | OCA2       | -0.251653323 | 9.10E-08    |
| AC007255.8 | TMEM139    | -0.330219945 | 1.25E-12    |
| AC007255.8 | ARHGAP24   | -0.414357411 | 1.21E-19    |

|            |          |              |             |
|------------|----------|--------------|-------------|
| AC007255.8 | SLC25A15 | -0.453098002 | 1.31E-23    |
| AC007255.8 | DES      | -0.220071086 | 3.24E-06    |
| AC007255.8 | GDF10    | -0.230438176 | 1.06E-06    |
| AC007255.8 | KIAA1324 | -0.294081572 | 3.31E-10    |
| AC007255.8 | JUN      | -0.168008914 | 0.000407309 |
| AC007255.8 | C7       | -0.062822013 | 0.188909301 |
| AC007255.8 | LGI3     | -0.4464681   | 6.79E-23    |
| AC007255.8 | CDON     | -0.350119578 | 4.18E-14    |
| AC007255.8 | BCL2     | -0.400735994 | 2.30E-18    |
| AC007255.8 | HLF      | -0.293717476 | 3.49E-10    |
| AC007255.8 | EGR1     | -0.106214797 | 0.026054357 |
| AC007255.8 | IP6K3    | -0.506232384 | 6.00E-30    |
| AC007255.8 | SCUBE3   | -0.247774316 | 1.45E-07    |
| AC007255.8 | PKNOX2   | -0.13685435  | 0.004068907 |
| AC007255.8 | SMAD9    | -0.359572467 | 7.61E-15    |
| AC007255.8 | IQGAP2   | -0.510797135 | 1.51E-30    |
| AC007255.8 | GNA14    | -0.320566356 | 5.99E-12    |
| AC007255.8 | LAYN     | -0.197292503 | 3.14E-05    |
| AC007255.8 | AVPR1A   | -0.255638485 | 5.59E-08    |
| AC007255.8 | PDLIM3   | -0.41242665  | 1.86E-19    |
| AC007255.8 | GPM6A    | -0.389096541 | 2.56E-17    |
| AC007255.8 | SDPR     | -0.091664275 | 0.054965851 |
| AC007255.8 | CRYAB    | -0.501302971 | 2.59E-29    |
| AC007255.8 | FOXA2    | -0.180218982 | 0.00014683  |
| AC007255.8 | C8orf88  | -0.300260644 | 1.34E-10    |
| AC007255.8 | ISM1     | -0.246783653 | 1.63E-07    |
| AC007255.8 | BMP2     | -0.273265246 | 5.87E-09    |
| AC007255.8 | ID4      | -0.310599023 | 2.84E-11    |
| AC007255.8 | NUPR1    | -0.631962647 | 2.53E-50    |
| AC007255.8 | SERTM1   | -0.574486544 | 6.50E-40    |
| AC007255.8 | IRS1     | -0.274118042 | 5.24E-09    |
| AC007255.8 | FIBIN    | -0.444792363 | 1.02E-22    |
| AC007255.8 | PODN     | -0.184413037 | 0.000101806 |
| AC007255.8 | TDRD9    | -0.429574639 | 3.86E-21    |
| AC007255.8 | EPHA3    | -0.188740423 | 6.92E-05    |
| AC007255.8 | AIF1L    | -0.347951807 | 6.12E-14    |
| AC007255.8 | EBF4     | -0.355836614 | 1.50E-14    |
| AC007255.8 | ADM2     | -0.520312999 | 8.02E-32    |
| AC007255.8 | GSTM3    | -0.379365083 | 1.78E-16    |
| AC007255.8 | HSD17B6  | -0.147285491 | 0.001974337 |
| AC007255.8 | AGR3     | -0.250590674 | 1.03E-07    |
| AC007255.8 | EPHB1    | -0.460325393 | 2.08E-24    |
| AC007255.8 | TMOD1    | -0.339910483 | 2.47E-13    |
| AC007255.8 | WASF3    | -0.34754516  | 6.58E-14    |
| AC007255.8 | SELV     | -0.373244655 | 5.85E-16    |
| AC007255.8 | ENPP1    | -0.412472464 | 1.84E-19    |
| AC007255.8 | SYNE1    | -0.276995435 | 3.57E-09    |
| AC007255.8 | PLCH1    | -0.290492167 | 5.53E-10    |
| AC007255.8 | CCDC146  | -0.275388195 | 4.43E-09    |
| AC007255.8 | SLC16A2  | -0.19256847  | 4.88E-05    |
| AC007255.8 | IER2     | -0.188861481 | 6.84E-05    |



|            |          |              |             |
|------------|----------|--------------|-------------|
| AC007255.8 | KCNAB1   | -0.056165375 | 0.240247939 |
| AC007255.8 | SYNDIG1  | -0.374995927 | 4.18E-16    |
| AC007255.8 | C16orf89 | -0.27291739  | 6.15E-09    |
| AC007255.8 | CTGF     | -0.078531487 | 0.100328168 |
| AC007255.8 | NR4A3    | -0.119585729 | 0.01216025  |
| AC007255.8 | KIAA1456 | -0.440996655 | 2.58E-22    |
| AC007255.8 | AQP4     | -0.256985372 | 4.73E-08    |
| AC007255.8 | RNF150   | -0.308810313 | 3.74E-11    |
| AC007255.8 | C1S      | -0.179104776 | 0.000161613 |
| AC007255.8 | PFKFB2   | -0.544179609 | 3.31E-35    |
| AC007255.8 | PROX1    | -0.236206278 | 5.56E-07    |
| AC007255.8 | TCF7L1   | -0.226354329 | 1.66E-06    |
| AC007255.8 | HSPB6    | -0.123033581 | 0.00987145  |
| AC007255.8 | FHDC1    | -0.350397011 | 3.98E-14    |
| AC007255.8 | PRR15L   | -0.470244572 | 1.55E-25    |
| AC007255.8 | SLC1A1   | -0.500593217 | 3.20E-29    |
| AC007255.8 | BTBD11   | -0.241424614 | 3.06E-07    |
| AC007255.8 | TRIM58   | -0.364524575 | 3.05E-15    |
| AC007255.8 | LRIG1    | -0.466860617 | 3.80E-25    |
| AC007255.8 | ROR2     | -0.297721047 | 1.95E-10    |
| AC007255.8 | GPR125   | -0.388544864 | 2.86E-17    |
| AC007255.8 | FLRT1    | -0.27056516  | 8.38E-09    |
| AC007255.8 | PGF      | -0.272510246 | 6.49E-09    |
| AC007255.8 | DUSP1    | -0.142084317 | 0.002848228 |
| AC007255.8 | PLA2G7   | -0.235267244 | 6.18E-07    |
| AC007255.8 | PLSCR4   | -0.353339426 | 2.35E-14    |
| AC007255.8 | FAM46B   | -0.538094575 | 2.56E-34    |
| AC007255.8 | GLDC     | -0.32131774  | 5.32E-12    |
| AC007255.8 | ZBTB16   | -0.299007511 | 1.62E-10    |
| AC007255.8 | OMD      | -0.209205153 | 9.88E-06    |
| AC007255.8 | HSD11B2  | -0.13617807  | 0.004257303 |
| AC007255.8 | FGL2     | -0.17259182  | 0.000279938 |
| AC007255.8 | CLCNKA   | -0.351595336 | 3.21E-14    |
| AC007255.8 | GATM     | -0.408096995 | 4.77E-19    |
| AC007255.8 | TNS3     | -0.376092329 | 3.38E-16    |
| AC007255.8 | TOB1     | -0.264056387 | 1.95E-08    |
| AC007255.8 | MARC2    | -0.444458549 | 1.11E-22    |
| AC007255.8 | LRRC2    | -0.480031275 | 1.10E-26    |
| AC007255.8 | SORD     | -0.258978115 | 3.69E-08    |
| AC007255.8 | RIMS4    | -0.187223402 | 7.93E-05    |
| AC007255.8 | SLC29A4  | -0.316798519 | 1.09E-11    |
| AC007255.8 | SLC39A14 | -0.477780459 | 2.04E-26    |
| AC007255.8 | FAXDC2   | -0.355709386 | 1.54E-14    |
| AC007255.8 | HSPB8    | -0.468010918 | 2.80E-25    |
| AC007255.8 | CCL19    | -0.053942643 | 0.259394769 |
| AC007255.8 | KCNIP3   | -0.250162501 | 1.09E-07    |
| AC007255.8 | CGNL1    | -0.214306172 | 5.89E-06    |
| AC007255.8 | ATF3     | -0.057745514 | 0.227254634 |
| AC007255.8 | SGCD     | -0.372015783 | 7.41E-16    |
| AC007255.8 | STARD13  | -0.265190093 | 1.68E-08    |
| AC007255.8 | LDHD     | -0.406524658 | 6.70E-19    |

|            |          |              |             |
|------------|----------|--------------|-------------|
| AC007255.8 | RCAN1    | -0.252657987 | 8.05E-08    |
| AC007255.8 | ID3      | -0.410868993 | 2.61E-19    |
| AC007255.8 | SYTL3    | -0.393355419 | 1.07E-17    |
| AC007255.8 | MT1E     | -0.376775843 | 2.96E-16    |
| AC007255.8 | CAMK1D   | -0.267223402 | 1.29E-08    |
| AC007255.8 | PRKCQ    | -0.405258973 | 8.79E-19    |
| AC007255.8 | NUAK2    | -0.499427881 | 4.50E-29    |
| AC007255.8 | LIPG     | -0.084955157 | 0.075379387 |
| AC007255.8 | SLC25A25 | -0.350872379 | 3.65E-14    |
| AC007255.8 | PRKX     | -0.251375778 | 9.41E-08    |
| AC007255.8 | SRPX     | -0.10133382  | 0.033788029 |
| AC007255.8 | FAM189A1 | -0.193076105 | 4.66E-05    |
| AC007255.8 | PLEKHH1  | -0.196727423 | 3.31E-05    |
| AC007255.8 | WNT11    | -0.271624968 | 7.29E-09    |
| AC007255.8 | SNAI1    | -0.284369405 | 1.30E-09    |
| AC007255.8 | FDCSP    | -0.081424798 | 0.088380102 |
| AC007255.8 | MT1X     | -0.349328126 | 4.80E-14    |
| AC007255.8 | ACACB    | -0.412864927 | 1.69E-19    |
| AC007255.8 | ARC      | 0.111329024  | 0.019637189 |
| AC007255.8 | KLK4     | -0.513992342 | 5.71E-31    |
| AC007255.8 | ZFPM2    | -0.118700097 | 0.012819062 |
| AC007255.8 | AKAP12   | -0.110214041 | 0.020904929 |
| AC007255.8 | GJB6     | -0.285715481 | 1.08E-09    |
| AC007255.8 | ERO1LB   | -0.284246148 | 1.33E-09    |
| AC007255.8 | DNALI1   | -0.169822943 | 0.000351522 |
| AC007255.8 | HKDC1    | -0.448330992 | 4.29E-23    |
| AC007255.8 | ZFP36L2  | -0.344094542 | 1.20E-13    |
| AC007255.8 | CAPSL    | -0.196784473 | 3.30E-05    |
| AC007255.8 | CYP7B1   | -0.292420587 | 4.20E-10    |
| AC007255.8 | CPQ      | -0.104443816 | 0.028663106 |
| AC007255.8 | RPS6KA6  | -0.284555718 | 1.27E-09    |
| AC007255.8 | TLE1     | -0.50151828  | 2.44E-29    |
| AC007255.8 | TP53INP2 | -0.247406744 | 1.51E-07    |
| AC007255.8 | KATNAL2  | -0.366462427 | 2.12E-15    |
| AC007255.8 | SGPP2    | -0.391465933 | 1.58E-17    |
| AC007255.8 | CTH      | -0.438548756 | 4.64E-22    |
| AC007255.8 | KIF12    | -0.250805379 | 1.01E-07    |
| AC007255.8 | TMEM220  | -0.308496994 | 3.92E-11    |
| AC007255.8 | CENPJ    | -0.302085026 | 1.03E-10    |
| AC007255.8 | FAM155B  | 0.011171106  | 0.815450332 |
| AC007255.8 | WFS1     | -0.449060532 | 3.58E-23    |
| AC007255.8 | SELENBP1 | -0.207240546 | 1.20E-05    |
| AC007255.8 | SNTA1    | -0.612414346 | 1.53E-46    |
| AC007255.8 | FRAS1    | -0.392658501 | 1.24E-17    |
| AC007255.8 | FBLN7    | -0.445932168 | 7.75E-23    |
| AC007255.8 | AGPAT9   | -0.317257079 | 1.01E-11    |
| AC007255.8 | GPR83    | -0.214534459 | 5.76E-06    |
| AC007255.8 | PRTG     | -0.312005624 | 2.29E-11    |
| AC007255.8 | EGR3     | 0.106096292  | 0.026222302 |
| AC007255.8 | GRAMD2   | -0.386815513 | 4.06E-17    |
| AC007255.8 | HYOU1    | -0.338054471 | 3.38E-13    |

|            |          |              |             |
|------------|----------|--------------|-------------|
| AC007255.8 | FBLN5    | -0.134747286 | 0.004682104 |
| AC007255.8 | ITM2A    | -0.114387179 | 0.016497508 |
| AC007255.8 | SRF      | -0.206646461 | 1.27E-05    |
| AC007255.8 | FGFR2    | -0.21774828  | 4.13E-06    |
| AC007255.8 | MT1A     | -0.25913677  | 3.62E-08    |
| AC007255.8 | MAMDC2   | -0.127808888 | 0.007334484 |
| AC007255.8 | FHL2     | -0.371869691 | 7.62E-16    |
| AC007255.8 | FTCDNL1  | -0.572581111 | 1.33E-39    |
| AC007255.8 | PKIA     | -0.003136732 | 0.947748346 |
| AC007255.8 | DNAJB4   | -0.148340973 | 0.001830202 |
| AC007255.8 | SLC25A33 | -0.432104733 | 2.14E-21    |
| AC007255.8 | EYA2     | -0.533018573 | 1.37E-33    |
| AC007255.8 | LPAR1    | -0.501164254 | 2.70E-29    |
| AC007255.8 | STX11    | -0.418306232 | 5.05E-20    |
| AC007255.8 | ARHGEF28 | -0.539442597 | 1.64E-34    |
| AC007255.8 | OR2W3    | -0.321649993 | 5.04E-12    |
| AC007255.8 | ALDH1B1  | -0.588344717 | 3.10E-42    |
| AC007255.8 | CXCL12   | -0.091309965 | 0.055915096 |
| AC007255.8 | OLFM2    | -0.121032682 | 0.011148074 |
| AC007255.8 | TUB      | -0.292131451 | 4.38E-10    |
| AC007255.8 | HTRA3    | -0.16441419  | 0.000542985 |
| AC007255.8 | CKB      | -0.460046399 | 2.23E-24    |
| AC007255.8 | RGS2     | -0.223931464 | 2.15E-06    |
| AC007255.8 | SHANK2   | -0.241703324 | 2.96E-07    |
| AC007255.8 | CNTFR    | -0.212184917 | 7.32E-06    |
| AC007255.8 | CYTH3    | -0.234705426 | 6.58E-07    |
| AC007255.8 | PLAC9    | -0.091805403 | 0.054591496 |
| AC007255.8 | WVOX     | -0.287589395 | 8.32E-10    |
| AC007255.8 | NPR3     | -0.146080299 | 0.002151566 |
| AC007255.8 | SDC2     | -0.037795884 | 0.429565054 |
| AC007255.8 | KLF15    | -0.316185569 | 1.20E-11    |
| AC007255.8 | TMEM164  | -0.41364404  | 1.42E-19    |
| AC007255.8 | LONRF3   | -0.021161417 | 0.658368862 |
| AC007255.8 | GBP1     | -0.158462696 | 0.000862953 |
| AC007255.8 | ARHGAP6  | -0.414680941 | 1.13E-19    |
| AC007255.8 | TMEM119  | -0.131697926 | 0.005717507 |
| AC007255.8 | SH3RF1   | -0.340787747 | 2.12E-13    |
| AC007255.8 | CRELD2   | -0.290585921 | 5.45E-10    |
| AC007255.8 | PCP4     | -0.186427269 | 8.51E-05    |
| AC007255.8 | GCSH     | -0.299497417 | 1.50E-10    |
| AC007255.8 | IMPA2    | -0.357801203 | 1.05E-14    |
| AC007255.8 | C1R      | -0.165898872 | 0.000482528 |
| AC007255.8 | SUCNR1   | -0.087377313 | 0.067393936 |
| AC007255.8 | SFRP1    | -0.236711147 | 5.25E-07    |
| AC007255.8 | UGT8     | -0.493490146 | 2.52E-28    |
| AC007255.8 | TLE4     | -0.10501613  | 0.027796562 |
| AC007255.8 | ANTXR1   | -0.233391374 | 7.63E-07    |
| AC007255.8 | GPX3     | -0.451873024 | 1.78E-23    |
| AC007255.8 | DPY19L2  | -0.322179472 | 4.63E-12    |
| AC007255.8 | FAM46C   | -0.334085367 | 6.60E-13    |
| AC007255.8 | IL33     | -0.131553398 | 0.005771336 |

|            |          |              |             |
|------------|----------|--------------|-------------|
| AC007255.8 | PEG3     | -0.258414809 | 3.96E-08    |
| AC007255.8 | FAHD2A   | -0.464524415 | 7.00E-25    |
| AC007255.8 | PTGDS    | -0.018841101 | 0.693821501 |
| AC007255.8 | CHCHD10  | -0.565705335 | 1.69E-38    |
| AC007255.8 | CD36     | -0.205292269 | 1.46E-05    |
| AC007255.8 | ANKRD37  | -0.159934684 | 0.00077066  |
| AC007255.8 | TSPAN33  | -0.365521549 | 2.53E-15    |
| AC007255.8 | PRDM16   | -0.212476825 | 7.10E-06    |
| AC007255.8 | UST      | -0.133201046 | 0.005183855 |
| AC007255.8 | NEXN     | -0.290627267 | 5.42E-10    |
| AC007255.8 | NUPR1L   | -0.164903729 | 0.000522314 |
| AC007255.8 | SLC24A3  | -0.57808142  | 1.66E-40    |
| AC007255.8 | MARC1    | -0.192331105 | 4.99E-05    |
| AC007255.8 | MYH11    | -0.078999551 | 0.098312636 |
| AC007255.8 | APOA1    | -0.262515122 | 2.37E-08    |
| AC007255.8 | TMEM178B | -0.170477664 | 0.0003332   |
| AC007255.8 | CAPN6    | -0.106169342 | 0.026118665 |
| AC007255.8 | PPM1L    | -0.33512624  | 5.54E-13    |
| AC007255.8 | FZD8     | -0.373026019 | 6.10E-16    |
| AC007255.8 | RCAN2    | -0.255227157 | 5.88E-08    |
| AC007255.8 | COPZ2    | -0.514341862 | 5.12E-31    |
| AC007255.8 | GAS1     | -0.308121055 | 4.15E-11    |
| AC007255.8 | DACT1    | -0.243604015 | 2.37E-07    |
| AC007255.8 | WBSCR17  | -0.078116684 | 0.102141668 |
| AC007255.8 | NCS1     | -0.328055437 | 1.79E-12    |
| AC007255.8 | SPIRE2   | -0.397444375 | 4.59E-18    |
| AC007255.8 | C15orf52 | -0.544206061 | 3.28E-35    |
| AC007255.8 | SPAG5    | -0.360789998 | 6.09E-15    |
| AC007255.8 | ARL4D    | -0.451251847 | 2.08E-23    |
| AC007255.8 | FAM189A2 | -0.013498586 | 0.777918011 |
| AC007255.8 | MAP1LC3A | -0.327858709 | 1.85E-12    |
| AC007255.8 | KLF6     | -0.019356183 | 0.68589017  |
| AC007255.8 | ADD3     | -0.084279657 | 0.077738756 |
| AC007255.8 | TSPAN7   | -0.065996615 | 0.167480316 |
| AC007255.8 | KLF9     | -0.093896297 | 0.049289105 |
| AC007255.8 | KCNQ1    | -0.402634273 | 1.54E-18    |
| AC007255.8 | MAN1A1   | -0.147370522 | 0.001962352 |
| AC007255.8 | MLF1     | -0.200137334 | 2.40E-05    |
| AC007255.8 | RARB     | -0.238713181 | 4.18E-07    |
| AC007255.8 | CDC42EP2 | -0.30842565  | 3.96E-11    |
| AC007255.8 | FAM3B    | -0.262268174 | 2.44E-08    |
| AC007255.8 | GADD45B  | -0.195784702 | 3.62E-05    |
| AC007255.8 | TMEM47   | -0.120064359 | 0.011816799 |
| AC007255.8 | SDF2L1   | -0.209079963 | 1.00E-05    |
| AC007255.8 | CCDC85A  | -0.239396057 | 3.86E-07    |
| AC007255.8 | CRYBG3   | -0.295335131 | 2.76E-10    |
| AC007255.8 | FBLN2    | -0.101329211 | 0.03379617  |
| AC007255.8 | PEBP4    | -0.308201122 | 4.10E-11    |
| AC007255.8 | CDADC1   | -0.275563577 | 4.32E-09    |
| AC007255.8 | FAM63A   | -0.307529168 | 4.54E-11    |
| AC007255.8 | GLUL     | -0.32787119  | 1.84E-12    |

|            |          |              |             |
|------------|----------|--------------|-------------|
| AC007255.8 | FREM2    | -0.480010709 | 1.11E-26    |
| AC007255.8 | ACKR3    | -0.206913611 | 1.24E-05    |
| AC007255.8 | DENND6A  | -0.364230475 | 3.22E-15    |
| AC007255.8 | CLDN8    | -0.441451031 | 2.31E-22    |
| AC007255.8 | UTS2R    | -0.063483488 | 0.184285842 |
| AC007255.8 | SCNN1B   | -0.246161413 | 1.76E-07    |
| AC007255.8 | TTC30A   | -0.430959964 | 2.79E-21    |
| AC007255.8 | CORO2B   | -0.116137593 | 0.014905839 |
| AC007255.8 | TC2N     | -0.511533767 | 1.21E-30    |
| AC007255.8 | ALDH2    | -0.474175947 | 5.42E-26    |
| AC007255.8 | GPR183   | -0.097529744 | 0.041099929 |
| AC007255.8 | C4orf47  | -0.184461829 | 0.000101368 |
| AC007255.8 | SLC25A42 | -0.210392668 | 8.77E-06    |
| AC007255.8 | LGMN     | -0.462505361 | 1.18E-24    |
| AC007255.8 | ACSF2    | -0.536632375 | 4.17E-34    |
| AC007255.8 | KIAA1467 | -0.420421806 | 3.14E-20    |
| AC007255.8 | PRKG1    | -0.185275692 | 9.43E-05    |
| AC007255.8 | GNAI1    | -0.351051803 | 3.54E-14    |
| AC007255.8 | ABCC4    | -0.344268789 | 1.16E-13    |
| AC007255.8 | PRPS1    | -0.417069907 | 6.65E-20    |
| AC007255.8 | TSPAN5   | -0.484136047 | 3.54E-27    |
| AC007255.8 | CR2      | -0.13411315  | 0.004882325 |
| AC007255.8 | CCDC170  | -0.401257388 | 2.06E-18    |
| AC007255.8 | RRAD     | -0.145667269 | 0.002215573 |
| AC007255.8 | SCGB2A1  | -0.425763045 | 9.30E-21    |
| AC007255.8 | SESN3    | -0.229724667 | 1.15E-06    |
| AC007255.8 | SGK223   | -0.197098966 | 3.20E-05    |
| AC007255.8 | NDRG2    | -0.367605848 | 1.71E-15    |
| AC007255.8 | C3orf52  | -0.355949091 | 1.47E-14    |
| AC007255.8 | FLRT3    | 0.328109548  | 1.77E-12    |
| AC007255.8 | MST1R    | 0.446712344  | 6.39E-23    |
| AC007255.8 | SDC1     | -0.068157152 | 0.153972973 |
| AC007255.8 | ST8SIA4  | 0.180738458  | 0.000140381 |
| AC007255.8 | UBTD1    | 0.417911712  | 5.51E-20    |
| AC007255.8 | EPHA2    | 0.414379608  | 1.21E-19    |
| AC007255.8 | TMEM130  | 0.680245343  | 6.22E-61    |
| AC007255.8 | SPINK2   | 0.225439337  | 1.83E-06    |
| AC007255.8 | MMP16    | 0.343883559  | 1.25E-13    |
| AC007255.8 | SIGLEC15 | 0.556499597  | 4.62E-37    |
| AC007255.8 | RIN1     | 0.59110251   | 1.04E-42    |
| AC007255.8 | IL1RN    | 0.027608419  | 0.563992593 |
| AC007255.8 | FCER1G   | 0.214634738  | 5.70E-06    |
| AC007255.8 | CD276    | 0.506488401  | 5.56E-30    |
| AC007255.8 | CTSB     | 0.230325632  | 1.07E-06    |
| AC007255.8 | FAM171A2 | 0.599812172  | 3.06E-44    |
| AC007255.8 | ASPHD1   | 0.360916375  | 5.95E-15    |
| AC007255.8 | C15orf48 | 0.00084606   | 0.985897026 |
| AC007255.8 | DYSF     | 0.508252786  | 3.27E-30    |
| AC007255.8 | PDZRN4   | 0.636102169  | 3.70E-51    |
| AC007255.8 | EFHD2    | 0.536883781  | 3.83E-34    |
| AC007255.8 | ASF1B    | 0.155701124  | 0.001064192 |

|            |          |             |             |
|------------|----------|-------------|-------------|
| AC007255.8 | AQP1     | 0.430652319 | 3.00E-21    |
| AC007255.8 | ARRDC2   | 0.497648674 | 7.56E-29    |
| AC007255.8 | PRSS1    | 0.562178778 | 6.07E-38    |
| AC007255.8 | MAPK13   | 0.404604039 | 1.01E-18    |
| AC007255.8 | CST5     | 0.261620322 | 2.65E-08    |
| AC007255.8 | AHR      | 0.318915512 | 7.79E-12    |
| AC007255.8 | BAX      | 0.250548228 | 1.04E-07    |
| AC007255.8 | C1orf115 | 0.548823575 | 6.76E-36    |
| AC007255.8 | PLK3     | 0.413873391 | 1.35E-19    |
| AC007255.8 | JAG2     | 0.462037156 | 1.34E-24    |
| AC007255.8 | RAD23B   | 0.544557321 | 2.91E-35    |
| AC007255.8 | CA12     | 0.255657704 | 5.58E-08    |
| AC007255.8 | ADTRP    | 0.55176833  | 2.43E-36    |
| AC007255.8 | UCP2     | 0.531198091 | 2.48E-33    |
| AC007255.8 | IGFBP2   | 0.227875251 | 1.40E-06    |
| AC007255.8 | LOXL2    | 0.34748346  | 6.65E-14    |
| AC007255.8 | GPX1     | 0.259543975 | 3.44E-08    |
| AC007255.8 | P3H3     | 0.446059893 | 7.51E-23    |
| AC007255.8 | C2orf81  | 0.65542885  | 3.10E-55    |
| AC007255.8 | CDT1     | 0.181176168 | 0.000135154 |
| AC007255.8 | SNX25    | 0.633330242 | 1.35E-50    |
| AC007255.8 | MTHFD1L  | 0.265374765 | 1.64E-08    |
| AC007255.8 | CDC42BPG | 0.392480013 | 1.28E-17    |
| AC007255.8 | MSN      | 0.416231152 | 8.02E-20    |
| AC007255.8 | SIGLEC6  | 0.500477549 | 3.31E-29    |
| AC007255.8 | F2R      | 0.289378389 | 6.47E-10    |
| AC007255.8 | TMEM184A | 0.328947026 | 1.55E-12    |
| AC007255.8 | CKS2     | 0.056242464 | 0.239602188 |
| AC007255.8 | TAX1BP3  | 0.330062435 | 1.29E-12    |
| AC007255.8 | PMEPA1   | 0.435290186 | 1.01E-21    |
| AC007255.8 | CXCL16   | 0.251055367 | 9.78E-08    |
| AC007255.8 | FAXC     | 0.390381019 | 1.97E-17    |
| AC007255.8 | VTCN1    | 0.127246074 | 0.007599622 |
| AC007255.8 | SH2D4A   | 0.423219335 | 1.66E-20    |
| AC007255.8 | RNF24    | 0.43283094  | 1.80E-21    |
| AC007255.8 | LY6G6C   | 0.302369694 | 9.84E-11    |
| AC007255.8 | NID1     | 0.3621249   | 4.76E-15    |
| AC007255.8 | STAC     | 0.292776173 | 3.99E-10    |
| AC007255.8 | RAB34    | 0.616708116 | 2.38E-47    |
| AC007255.8 | HES4     | 0.314750459 | 1.50E-11    |
| AC007255.8 | EPHA10   | 0.46736726  | 3.32E-25    |
| AC007255.8 | ENTPD2   | 0.637346437 | 2.06E-51    |
| AC007255.8 | DDB2     | 0.324937853 | 2.97E-12    |
| AC007255.8 | NKAIN4   | 0.328733065 | 1.60E-12    |
| AC007255.8 | TRIM29   | 0.337677822 | 3.61E-13    |
| AC007255.8 | ADCY8    | 0.465007207 | 6.17E-25    |
| AC007255.8 | SFTA2    | 0.073261168 | 0.125355791 |
| AC007255.8 | NRIP1    | 0.554207506 | 1.04E-36    |
| AC007255.8 | VWA1     | 0.499619858 | 4.25E-29    |
| AC007255.8 | APLNR    | 0.394003048 | 9.38E-18    |
| AC007255.8 | REN      | 0.638667537 | 1.11E-51    |

|            |          |              |             |
|------------|----------|--------------|-------------|
| AC007255.8 | EDIL3    | 0.343305146  | 1.38E-13    |
| AC007255.8 | AGRN     | 0.473150393  | 7.14E-26    |
| AC007255.8 | TREM1    | 0.320225663  | 6.32E-12    |
| AC007255.8 | SRL      | 0.397505295  | 4.53E-18    |
| AC007255.8 | RASGRF1  | 0.711631528  | 5.33E-69    |
| AC007255.8 | RMI2     | 0.361142464  | 5.70E-15    |
| AC007255.8 | SAMD1    | 0.413535463  | 1.46E-19    |
| AC007255.8 | MGAT4B   | 0.384959005  | 5.89E-17    |
| AC007255.8 | NXN      | 0.385699324  | 5.08E-17    |
| AC007255.8 | SH3BGRL3 | 0.291604242  | 4.72E-10    |
| AC007255.8 | CA11     | 0.540054129  | 1.33E-34    |
| AC007255.8 | PLD3     | 0.556785257  | 4.18E-37    |
| AC007255.8 | LURAP1L  | 0.062073608  | 0.19424249  |
| AC007255.8 | CARNS1   | 0.558335256  | 2.41E-37    |
| AC007255.8 | PDLIM7   | 0.556304003  | 4.95E-37    |
| AC007255.8 | BCL2L1   | 0.292930846  | 3.90E-10    |
| AC007255.8 | GGT6     | 0.324261927  | 3.31E-12    |
| AC007255.8 | DPYSL3   | 0.404909698  | 9.48E-19    |
| AC007255.8 | FYN      | 0.504131987  | 1.12E-29    |
| AC007255.8 | TK1      | 0.09141535   | 0.055631344 |
| AC007255.8 | AK1      | 0.353931172  | 2.12E-14    |
| AC007255.8 | HIGD1B   | 0.477144389  | 2.43E-26    |
| AC007255.8 | TMEM59L  | 0.41995346   | 3.49E-20    |
| AC007255.8 | MEGF9    | 0.366007413  | 2.31E-15    |
| AC007255.8 | ZFP36L1  | 0.376718186  | 2.99E-16    |
| AC007255.8 | ADRA1B   | 0.564573899  | 2.55E-38    |
| AC007255.8 | EPHA4    | 0.431367462  | 2.54E-21    |
| AC007255.8 | TCERG1L  | 0.557849534  | 2.86E-37    |
| AC007255.8 | NGFR     | 0.623445246  | 1.21E-48    |
| AC007255.8 | EBI3     | 0.237445794  | 4.83E-07    |
| AC007255.8 | S100A10  | 0.185292712  | 9.42E-05    |
| AC007255.8 | S100B    | 0.257583642  | 4.39E-08    |
| AC007255.8 | CD44     | 0.594186763  | 3.02E-43    |
| AC007255.8 | BHLHE41  | 0.521812291  | 5.01E-32    |
| AC007255.8 | FBXO2    | 0.525328012  | 1.64E-32    |
| AC007255.8 | SLC30A2  | -0.121945618 | 0.010548505 |
| AC007255.8 | FRMD5    | 0.106980647  | 0.024991181 |
| AC007255.8 | SAMD11   | 0.331932418  | 9.45E-13    |
| AC007255.8 | SIPA1L2  | 0.618708093  | 9.92E-48    |
| AC007255.8 | S100A16  | 0.278907463  | 2.76E-09    |
| AC007255.8 | PPL      | 0.255848475  | 5.45E-08    |
| AC007255.8 | ARHGD1B  | 0.39110907   | 1.70E-17    |
| AC007255.8 | CDC42EP3 | 0.171056927  | 0.000317737 |
| AC007255.8 | RUNX2    | 0.663921216  | 4.01E-57    |
| AC007255.8 | LAMC2    | 0.188237609  | 7.24E-05    |
| AC007255.8 | BRINP1   | 0.514826591  | 4.41E-31    |
| AC007255.8 | GPRC5B   | 0.48017219   | 1.06E-26    |
| AC007255.8 | AQP5     | 0.544106137  | 3.40E-35    |
| AC007255.8 | PLAG1    | 0.637570752  | 1.86E-51    |
| AC007255.8 | PTPRU    | 0.282286807  | 1.74E-09    |
| AC007255.8 | ANGPTL4  | 0.275254088  | 4.51E-09    |

|            |          |             |             |
|------------|----------|-------------|-------------|
| AC007255.8 | PALM3    | 0.450398128 | 2.57E-23    |
| AC007255.8 | ACP5     | 0.245369109 | 1.93E-07    |
| AC007255.8 | DLG4     | 0.675183099 | 1.00E-59    |
| AC007255.8 | ETNK2    | 0.685297021 | 3.67E-62    |
| AC007255.8 | CD109    | 0.580892564 | 5.67E-41    |
| AC007255.8 | SNX22    | 0.585321434 | 1.02E-41    |
| AC007255.8 | TMEM98   | 0.54136123  | 8.59E-35    |
| AC007255.8 | CTHRC1   | 0.244844099 | 2.05E-07    |
| AC007255.8 | S100A2   | 0.141649444 | 0.002935287 |
| AC007255.8 | C11orf80 | 0.406739967 | 6.40E-19    |
| AC007255.8 | SREBF1   | 0.421763942 | 2.32E-20    |
| AC007255.8 | PRSS22   | 0.308012478 | 4.22E-11    |
| AC007255.8 | CMTM3    | 0.339352637 | 2.71E-13    |
| AC007255.8 | RDH5     | 0.620747642 | 4.03E-48    |
| AC007255.8 | MYH10    | 0.47892466  | 1.49E-26    |
| AC007255.8 | EVPL     | 0.448186317 | 4.45E-23    |
| AC007255.8 | SCD      | 0.270169363 | 8.83E-09    |
| AC007255.8 | CD151    | 0.550894187 | 3.30E-36    |
| AC007255.8 | S100A4   | 0.331049339 | 1.09E-12    |
| AC007255.8 | BNIP1    | 0.543154905 | 4.69E-35    |
| AC007255.8 | MAP3K6   | 0.383460493 | 7.94E-17    |
| AC007255.8 | MANEAL   | 0.264922942 | 1.74E-08    |
| AC007255.8 | CD207    | 0.360342757 | 6.61E-15    |
| AC007255.8 | CD1A     | 0.34330268  | 1.38E-13    |
| AC007255.8 | C3       | 0.299635354 | 1.47E-10    |
| AC007255.8 | NT5E     | 0.313990141 | 1.68E-11    |
| AC007255.8 | CACNG4   | 0.298307472 | 1.79E-10    |
| AC007255.8 | FHOD1    | 0.420218695 | 3.28E-20    |
| AC007255.8 | LEMD1    | 0.480418562 | 9.91E-27    |
| AC007255.8 | ATP11A   | 0.599550979 | 3.40E-44    |
| AC007255.8 | PPAP2C   | 0.360815813 | 6.06E-15    |
| AC007255.8 | DRAM1    | 0.416555392 | 7.46E-20    |
| AC007255.8 | CDA      | 0.419005277 | 4.31E-20    |
| AC007255.8 | CCND2    | 0.58764246  | 4.10E-42    |
| AC007255.8 | LCN6     | 0.630369127 | 5.27E-50    |
| AC007255.8 | CDH4     | 0.362937983 | 4.09E-15    |
| AC007255.8 | MMP11    | 0.313919789 | 1.70E-11    |
| AC007255.8 | B3GAT1   | 0.450760948 | 2.35E-23    |
| AC007255.8 | SPP1     | 0.151593657 | 0.001444474 |
| AC007255.8 | HLA-DQB1 | 0.052604195 | 0.271419515 |
| AC007255.8 | SDC3     | 0.641589074 | 2.76E-52    |
| AC007255.8 | CX3CL1   | 0.277663479 | 3.26E-09    |
| AC007255.8 | SDK1     | 0.598183738 | 5.96E-44    |
| AC007255.8 | DOCK9    | 0.531235323 | 2.45E-33    |
| AC007255.8 | CSF2     | 0.440916311 | 2.63E-22    |
| AC007255.8 | GRHL3    | 0.421930104 | 2.23E-20    |
| AC007255.8 | TMEM92   | 0.425189702 | 1.06E-20    |
| AC007255.8 | BASP1    | 0.427376799 | 6.42E-21    |
| AC007255.8 | HRH1     | 0.4295145   | 3.91E-21    |
| AC007255.8 | ESM1     | 0.269339543 | 9.84E-09    |
| AC007255.8 | B4GALNT3 | 0.388034747 | 3.17E-17    |



|            |          |             |             |
|------------|----------|-------------|-------------|
| AC007255.8 | LMO3     | 0.400855846 | 2.24E-18    |
| AC007255.8 | C9orf16  | 0.238497943 | 4.28E-07    |
| AC007255.8 | SEMA3F   | 0.630105855 | 5.95E-50    |
| AC007255.8 | PLA2G12B | 0.571088677 | 2.32E-39    |
| AC007255.8 | KLK6     | 0.524733404 | 1.98E-32    |
| AC007255.8 | ST3GAL5  | 0.693305651 | 3.66E-64    |
| AC007255.8 | FAM132B  | 0.351766096 | 3.12E-14    |
| AC007255.8 | CDKN1A   | 0.103612011 | 0.029963831 |
| AC007255.8 | E2F1     | 0.15776975  | 0.000909845 |
| AC007255.8 | B3GNT8   | 0.434462849 | 1.23E-21    |
| AC007255.8 | MTMR11   | 0.529117763 | 4.86E-33    |
| AC007255.8 | MYO1G    | 0.300382482 | 1.32E-10    |
| AC007255.8 | TMSB10   | 0.381064719 | 1.28E-16    |
| AC007255.8 | UNC5CL   | 0.355641233 | 1.56E-14    |
| AC007255.8 | ABR      | 0.372899358 | 6.25E-16    |
| AC007255.8 | PLP2     | 0.349369258 | 4.77E-14    |
| AC007255.8 | SRCIN1   | 0.344244676 | 1.17E-13    |
| AC007255.8 | PDE9A    | 0.356777776 | 1.27E-14    |
| AC007255.8 | TREM2    | 0.222067722 | 2.62E-06    |
| AC007255.8 | KDEL3    | 0.390483    | 1.93E-17    |
| AC007255.8 | PC       | 0.527371959 | 8.54E-33    |
| AC007255.8 | C2CD4A   | 0.171358332 | 0.000309958 |
| AC007255.8 | PELI1    | 0.400211621 | 2.57E-18    |
| AC007255.8 | SSX1     | 0.322909367 | 4.12E-12    |
| AC007255.8 | MROH6    | 0.459511601 | 2.56E-24    |
| AC007255.8 | ESPN     | 0.61912325  | 8.26E-48    |
| AC007255.8 | BMP1     | 0.621488671 | 2.90E-48    |
| AC007255.8 | TM4SF4   | 0.485545616 | 2.39E-27    |
| AC007255.8 | CORO2A   | 0.569640185 | 3.97E-39    |
| AC007255.8 | CD164L2  | 0.375553148 | 3.75E-16    |
| AC007255.8 | CTSS     | 0.224491509 | 2.02E-06    |
| AC007255.8 | CLU      | 0.552387166 | 1.96E-36    |
| AC007255.8 | TMSB4X   | 0.39174436  | 1.49E-17    |
| AC007255.8 | WNT10A   | 0.458188842 | 3.60E-24    |
| AC007255.8 | NAPSA    | 0.371536727 | 8.12E-16    |
| AC007255.8 | PLEKHA4  | 0.62673729  | 2.76E-49    |
| AC007255.8 | SFTPA1   | 0.392815104 | 1.20E-17    |
| AC007255.8 | C1orf116 | 0.392969905 | 1.16E-17    |
| AC007255.8 | TM4SF1   | 0.25783441  | 4.26E-08    |
| AC007255.8 | SEL1L3   | 0.42604211  | 8.73E-21    |
| AC007255.8 | VASN     | 0.479258475 | 1.36E-26    |
| AC007255.8 | NPTXR    | 0.370632727 | 9.65E-16    |
| AC007255.8 | PDE4C    | 0.252009294 | 8.71E-08    |
| AC007255.8 | CDC42EP1 | 0.513647355 | 6.34E-31    |
| AC007255.8 | ENDOD1   | 0.452566537 | 1.49E-23    |
| AC007255.8 | RYR1     | 0.596294819 | 1.29E-43    |
| AC007255.8 | IL1RAP   | 0.600772765 | 2.06E-44    |
| AC007255.8 | SLC35F2  | 0.527479774 | 8.25E-33    |
| AC007255.8 | ISYNA1   | 0.675423442 | 8.80E-60    |
| AC007255.8 | HLA-G    | 0.16679961  | 0.000448964 |
| AC007255.8 | CDKN2B   | 0.243821593 | 2.31E-07    |

|            |          |             |             |
|------------|----------|-------------|-------------|
| AC007255.8 | ALDH1A3  | 0.223420212 | 2.27E-06    |
| AC007255.8 | CLIP3    | 0.555561627 | 6.44E-37    |
| AC007255.8 | ULBP2    | 0.441874132 | 2.08E-22    |
| AC007255.8 | ETHE1    | 0.315754455 | 1.28E-11    |
| AC007255.8 | XPR1     | 0.47910678  | 1.42E-26    |
| AC007255.8 | SPTBN2   | 0.316869296 | 1.07E-11    |
| AC007255.8 | IVL      | 0.360666259 | 6.23E-15    |
| AC007255.8 | MARCO    | 0.207521242 | 1.17E-05    |
| AC007255.8 | PLXND1   | 0.633580302 | 1.20E-50    |
| AC007255.8 | EMILIN2  | 0.401554111 | 1.94E-18    |
| AC007255.8 | PLAUR    | 0.279004338 | 2.72E-09    |
| AC007255.8 | CDC42EP5 | 0.474490543 | 4.98E-26    |
| AC007255.8 | TRPC5    | 0.781373789 | 1.60E-91    |
| AC007255.8 | TMEM100  | 0.467065998 | 3.60E-25    |
| AC007255.8 | QSOX1    | 0.568010687 | 7.24E-39    |
| AC007255.8 | ARHGAP23 | 0.57680304  | 2.71E-40    |
| AC007255.8 | MDFI     | 0.48248499  | 5.60E-27    |
| AC007255.8 | FSTL3    | 0.377342767 | 2.65E-16    |
| AC007255.8 | INF2     | 0.589009204 | 2.39E-42    |
| AC007255.8 | TGFBR1   | 0.600121661 | 2.69E-44    |
| AC007255.8 | TGFBI    | 0.361177072 | 5.67E-15    |
| AC007255.8 | ERBB3    | 0.307978863 | 4.24E-11    |
| AC007255.8 | CCL18    | 0.24683209  | 1.62E-07    |
| AC007255.8 | CCL17    | 0.259160386 | 3.61E-08    |
| AC007255.8 | C16orf45 | 0.642206067 | 2.05E-52    |
| AC007255.8 | PRDM1    | 0.610410397 | 3.61E-46    |
| AC007255.8 | TRIM47   | 0.250602197 | 1.03E-07    |
| AC007255.8 | CNFN     | 0.276653952 | 3.74E-09    |
| AC007255.8 | ARMCX3   | 0.668444479 | 3.73E-58    |
| AC007255.8 | RAMP1    | 0.6165355   | 2.57E-47    |
| AC007255.8 | GABRD    | 0.520400939 | 7.80E-32    |
| AC007255.8 | COL13A1  | 0.596570197 | 1.15E-43    |
| AC007255.8 | S100A5   | 0.429135298 | 4.27E-21    |
| AC007255.8 | MISP     | 0.190357652 | 5.97E-05    |
| AC007255.8 | HES6     | 0.416214203 | 8.05E-20    |
| AC007255.8 | PSD3     | 0.519785365 | 9.46E-32    |
| AC007255.8 | DOK7     | 0.451034552 | 2.19E-23    |
| AC007255.8 | ZMAT3    | 0.331900717 | 9.50E-13    |
| AC007255.8 | MFAP2    | 0.534480561 | 8.47E-34    |
| AC007255.8 | TMEM79   | 0.517796593 | 1.76E-31    |
| AC007255.8 | SLC1A5   | 0.354188394 | 2.02E-14    |
| AC007255.8 | BBC3     | 0.36550467  | 2.54E-15    |
| AC007255.8 | HLA-DQB2 | 0.167556808 | 0.000422442 |
| AC007255.8 | C1QL1    | 0.641030093 | 3.60E-52    |
| AC007255.8 | TMEM215  | 0.627581734 | 1.88E-49    |
| AC007255.8 | PNP      | 0.368590554 | 1.42E-15    |
| AC007255.8 | ARNTL    | 0.642870149 | 1.49E-52    |
| AC007255.8 | CLDN2    | 0.526075868 | 1.29E-32    |
| AC007255.8 | MVP      | 0.360340019 | 6.61E-15    |
| AC007255.8 | LGALS1   | 0.39273254  | 1.22E-17    |
| AC007255.8 | BIRC7    | 0.372244334 | 7.09E-16    |

|            |           |             |             |
|------------|-----------|-------------|-------------|
| AC007255.8 | COL8A1    | 0.533501741 | 1.17E-33    |
| AC007255.8 | PERP      | 0.21928686  | 3.52E-06    |
| AC007255.8 | GJA4      | 0.579738434 | 8.83E-41    |
| AC007255.8 | IGFL2     | 0.4604063   | 2.04E-24    |
| AC007255.8 | DAPK2     | 0.489524304 | 7.80E-28    |
| AC007255.8 | MAMLD1    | 0.621853831 | 2.47E-48    |
| AC007255.8 | ETV5      | 0.656592908 | 1.72E-55    |
| AC007255.8 | RUNX1     | 0.326580471 | 2.28E-12    |
| AC007255.8 | LONRF2    | 0.643305589 | 1.21E-52    |
| AC007255.8 | SPOCK1    | 0.561718643 | 7.16E-38    |
| AC007255.8 | XKRX      | 0.589366634 | 2.07E-42    |
| AC007255.8 | TGFB1     | 0.57320555  | 1.05E-39    |
| AC007255.8 | ERP27     | 0.3006741   | 1.27E-10    |
| AC007255.8 | TNFRSF10C | 0.310285066 | 2.98E-11    |
| AC007255.8 | PALM      | 0.539435151 | 1.64E-34    |
| AC007255.8 | TSC22D1   | 0.788092403 | 3.93E-94    |
| AC007255.8 | TGM2      | 0.208401272 | 1.07E-05    |
| AC007255.8 | UBE2QL1   | 0.644858424 | 5.72E-53    |
| AC007255.8 | ECE1      | 0.665108607 | 2.16E-57    |
| AC007255.8 | COL8A2    | 0.535860992 | 5.38E-34    |
| AC007255.8 | HIST3H2A  | 0.196553673 | 3.37E-05    |
| AC007255.8 | TNFRSF21  | 0.362822952 | 4.18E-15    |
| AC007255.8 | SOX4      | 0.400955416 | 2.20E-18    |
| AC007255.8 | ELF3      | 0.229551342 | 1.17E-06    |
| AC007255.8 | TPD52L1   | 0.442470912 | 1.80E-22    |
| AC007255.8 | INHBB     | 0.631617699 | 2.97E-50    |
| AC007255.8 | HPN       | 0.371147029 | 8.75E-16    |
| AC007255.8 | MMP7      | 0.150724494 | 0.001539479 |
| AC007255.8 | RAB27A    | 0.59798396  | 6.47E-44    |
| AC007255.8 | IGF2BP2   | 0.580119977 | 7.63E-41    |
| AC007255.8 | ITGB4     | 0.469279511 | 2.00E-25    |
| AC007255.8 | PPP1R1B   | 0.608120718 | 9.55E-46    |
| AC007255.8 | NPDC1     | 0.529351085 | 4.51E-33    |
| AC007255.8 | CCL13     | 0.339339141 | 2.72E-13    |
| AC007255.8 | SPINT1    | 0.322267695 | 4.57E-12    |
| AC007255.8 | HEY2      | 0.700361561 | 5.56E-66    |
| AC007255.8 | CST2      | 0.201687392 | 2.07E-05    |
| AC007255.8 | ADM       | 0.319127701 | 7.53E-12    |
| AC007255.8 | VSTM2L    | 0.079481514 | 0.096271061 |
| AC007255.8 | FAM84A    | 0.38065637  | 1.38E-16    |
| AC007255.8 | P4HA2     | 0.454698636 | 8.73E-24    |
| AC007255.8 | LPL       | 0.660947526 | 1.87E-56    |
| AC007255.8 | TMEM173   | 0.495015607 | 1.62E-28    |
| AC007255.8 | DHRS3     | 0.549497515 | 5.36E-36    |
| AC007255.8 | SCN1B     | 0.401288592 | 2.05E-18    |
| AC007255.8 | GLT1D1    | 0.63015486  | 5.82E-50    |
| AC007255.8 | PHYHIP    | 0.467578952 | 3.14E-25    |
| AC007255.8 | BHLHE40   | 0.354432283 | 1.93E-14    |
| AC007255.8 | BID       | 0.495595437 | 1.37E-28    |
| AC007255.8 | POSTN     | 0.1526646   | 0.001334826 |
| AC007255.8 | ITGA3     | 0.320642027 | 5.92E-12    |

|            |            |             |             |
|------------|------------|-------------|-------------|
| AC007255.8 | RSP04      | 0.533756127 | 1.07E-33    |
| AC007255.8 | ADAMTS9    | 0.783387731 | 2.70E-92    |
| AC007255.8 | ABTB2      | 0.480361047 | 1.01E-26    |
| AC007255.8 | KCNQ3      | 0.430585513 | 3.05E-21    |
| AC007255.8 | ANXA1      | 0.549821684 | 4.79E-36    |
| AC007255.8 | S100A11    | 0.327058675 | 2.11E-12    |
| AC007255.8 | CEACAM6    | 0.173511096 | 0.000259356 |
| AC007255.8 | IER5L      | 0.418448849 | 4.89E-20    |
| AC007255.8 | KRT80      | 0.2167679   | 4.57E-06    |
| AC007255.8 | CDH6       | 0.366923682 | 1.95E-15    |
| AC007255.8 | UNC5B      | 0.432454362 | 1.97E-21    |
| AC007255.8 | PLEKHN1    | 0.528157525 | 6.63E-33    |
| AC007255.8 | SYTL1      | 0.455115141 | 7.86E-24    |
| AC007255.8 | TMEM163    | 0.454146605 | 1.00E-23    |
| AC007255.8 | C4orf48    | 0.401070233 | 2.14E-18    |
| AC007255.8 | B3GNT7     | 0.612714261 | 1.35E-46    |
| AC007255.8 | BAIAP3     | 0.648608461 | 9.20E-54    |
| AC007255.8 | PHLDA2     | 0.350886067 | 3.65E-14    |
| AC007255.8 | GAP43      | 0.554645834 | 8.89E-37    |
| AC007255.8 | S100A1     | 0.160759255 | 0.000723039 |
| AC007255.8 | PTPRE      | 0.516874579 | 2.34E-31    |
| AC007255.8 | CCND1      | 0.433242055 | 1.64E-21    |
| AC007255.8 | ST6GALNAC5 | 0.261474354 | 2.70E-08    |
| AC007255.8 | KRT17      | 0.339892399 | 2.47E-13    |
| AC007255.8 | HPCAL4     | 0.731960005 | 7.91E-75    |
| AC007255.8 | GABBR2     | 0.534098664 | 9.61E-34    |
| AC007255.8 | DIRAS3     | 0.642718028 | 1.61E-52    |
| AC007255.8 | SERINC2    | 0.199265389 | 2.61E-05    |
| AC007255.8 | PTCHD4     | 0.439647712 | 3.56E-22    |
| AC007255.8 | EPS8       | 0.647023074 | 2.00E-53    |
| AC007255.8 | LY6E       | 0.48758241  | 1.35E-27    |
| AC007255.8 | UPP1       | 0.346170756 | 8.37E-14    |
| AC007255.8 | AHNAK2     | 0.265311364 | 1.66E-08    |
| AC007255.8 | PLXNC1     | 0.610406497 | 3.62E-46    |
| AC007255.8 | TNC        | 0.266723354 | 1.38E-08    |
| AC007255.8 | DUSP4      | 0.521971858 | 4.76E-32    |
| AC007255.8 | NRCAM      | 0.566889534 | 1.09E-38    |
| AC007255.8 | NRP2       | 0.726162973 | 4.11E-73    |
| AC007255.8 | CTSC       | 0.400325091 | 2.51E-18    |
| AC007255.8 | AMIGO2     | 0.732527851 | 5.34E-75    |
| AC007255.8 | NAB2       | 0.549801756 | 4.82E-36    |
| AC007255.8 | TBC1D2     | 0.328394499 | 1.69E-12    |
| AC007255.8 | PHLDA3     | 0.248970642 | 1.26E-07    |
| AC007255.8 | PTP4A3     | 0.386171004 | 4.62E-17    |
| AC007255.8 | CRABP2     | 0.339921263 | 2.46E-13    |
| AC007255.8 | GOS2       | 0.513058518 | 7.60E-31    |
| AC007255.8 | S100A6     | 0.27521019  | 4.53E-09    |
| AC007255.8 | FOXQ1      | 0.389733958 | 2.25E-17    |
| AC007255.8 | LRG1       | 0.513120217 | 7.46E-31    |
| AC007255.8 | LAMP5      | 0.496257818 | 1.13E-28    |
| AC007255.8 | ALDH3B1    | 0.27469993  | 4.85E-09    |

|            |         |             |             |
|------------|---------|-------------|-------------|
| AC007255.8 | CDH2    | 0.542477419 | 5.90E-35    |
| AC007255.8 | SCG5    | 0.615581147 | 3.89E-47    |
| AC007255.8 | ZCCHC16 | 0.764745239 | 1.90E-85    |
| AC007255.8 | GRB7    | 0.494831998 | 1.71E-28    |
| AC007255.8 | TIAM1   | 0.665076269 | 2.19E-57    |
| AC007255.8 | FXD5    | 0.474416929 | 5.08E-26    |
| AC007255.8 | CLDN9   | 0.354900275 | 1.78E-14    |
| AC007255.8 | FAM43A  | 0.480191764 | 1.05E-26    |
| AC007255.8 | CHST2   | 0.649552743 | 5.78E-54    |
| AC007255.8 | HMGA2   | 0.625117579 | 5.73E-49    |
| AC007255.8 | GALNT7  | 0.58054251  | 6.49E-41    |
| AC007255.8 | CBLN1   | 0.361634427 | 5.21E-15    |
| AC007255.8 | STRA6   | 0.549397661 | 5.54E-36    |
| AC007255.8 | MUC21   | 0.30676809  | 5.09E-11    |
| AC007255.8 | PRR36   | 0.615345556 | 4.31E-47    |
| AC007255.8 | NFE2L3  | 0.371007674 | 8.98E-16    |
| AC007255.8 | NR1D1   | 0.191455543 | 5.40E-05    |
| AC007255.8 | MUC1    | 0.092204888 | 0.053543302 |
| AC007255.8 | NAT8L   | 0.713187625 | 1.99E-69    |
| AC007255.8 | APOC1   | 0.559440239 | 1.62E-37    |
| AC007255.8 | EVA1A   | 0.442262766 | 1.90E-22    |
| AC007255.8 | ENTPD1  | 0.572309918 | 1.47E-39    |
| AC007255.8 | COL1A1  | 0.314891729 | 1.46E-11    |
| AC007255.8 | FNDC4   | 0.357093931 | 1.20E-14    |
| AC007255.8 | FRMD3   | 0.637536357 | 1.89E-51    |
| AC007255.8 | SHROOM4 | 0.679706574 | 8.39E-61    |
| AC007255.8 | NELL2   | 0.710259323 | 1.27E-68    |
| AC007255.8 | EPHB3   | 0.404253985 | 1.09E-18    |
| AC007255.8 | TMC6    | 0.489076027 | 8.85E-28    |
| AC007255.8 | NOD1    | 0.705553445 | 2.36E-67    |
| AC007255.8 | GGCT    | 0.526818226 | 1.02E-32    |
| AC007255.8 | ICAM1   | 0.397562384 | 4.48E-18    |
| AC007255.8 | PRSS23  | 0.543172989 | 4.66E-35    |
| AC007255.8 | CFI     | 0.507505942 | 4.10E-30    |
| AC007255.8 | CD55    | 0.309331069 | 3.45E-11    |
| AC007255.8 | RASD2   | 0.665344554 | 1.91E-57    |
| AC007255.8 | KLK11   | 0.559959568 | 1.35E-37    |
| AC007255.8 | ICAM5   | 0.650562482 | 3.51E-54    |
| AC007255.8 | ADORA1  | 0.364040555 | 3.34E-15    |
| AC007255.8 | ITGA2   | 0.377407941 | 2.62E-16    |
| AC007255.8 | ABCC3   | 0.555320858 | 7.01E-37    |
| AC007255.8 | MFGE8   | 0.546439148 | 1.53E-35    |
| AC007255.8 | STK32A  | 0.504383606 | 1.04E-29    |
| AC007255.8 | CYSLTR2 | 0.729507213 | 4.26E-74    |
| AC007255.8 | LAD1    | 0.390412082 | 1.96E-17    |
| AC007255.8 | MGAT3   | 0.349715554 | 4.49E-14    |
| AC007255.8 | IGFBP6  | 0.595572584 | 1.72E-43    |
| AC007255.8 | CYP2S1  | 0.259414549 | 3.50E-08    |
| AC007255.8 | KCNJ2   | 0.598196149 | 5.93E-44    |
| AC007255.8 | FAM20A  | 0.507017028 | 4.74E-30    |
| AC007255.8 | TGFA    | 0.687582374 | 1.00E-62    |

|            |           |             |             |
|------------|-----------|-------------|-------------|
| AC007255.8 | MXRA8     | 0.608426235 | 8.39E-46    |
| AC007255.8 | C8orf4    | 0.362176884 | 4.71E-15    |
| AC007255.8 | CLDN10    | 0.511010747 | 1.42E-30    |
| AC007255.8 | PDE5A     | 0.607809952 | 1.09E-45    |
| AC007255.8 | APOE      | 0.641037753 | 3.59E-52    |
| AC007255.8 | SPOCK2    | 0.330092079 | 1.28E-12    |
| AC007255.8 | TENM1     | 0.685610481 | 3.07E-62    |
| AC007255.8 | SLIT1     | 0.625297499 | 5.29E-49    |
| AC007255.8 | CXCL14    | 0.526698515 | 1.06E-32    |
| AC007255.8 | ECM1      | 0.501014545 | 2.82E-29    |
| AC007255.8 | DUSP5     | 0.377012569 | 2.82E-16    |
| AC007255.8 | SEZ6L2    | 0.347816069 | 6.27E-14    |
| AC007255.8 | THRSP     | 0.308005032 | 4.22E-11    |
| AC007255.8 | C19orf33  | 0.248861144 | 1.27E-07    |
| AC007255.8 | MPZL2     | 0.538425907 | 2.30E-34    |
| AC007255.8 | CTSH      | 0.498386441 | 6.10E-29    |
| AC007255.8 | CYP1B1    | 0.533878745 | 1.03E-33    |
| AC007255.8 | ALOX5     | 0.179061728 | 0.000162211 |
| AC007255.8 | SYTL5     | 0.540093047 | 1.32E-34    |
| AC007255.8 | TNFRSF12A | 0.517671209 | 1.83E-31    |
| AC007255.8 | DUSP6     | 0.601804419 | 1.34E-44    |
| AC007255.8 | ALOX15B   | 0.310227693 | 3.01E-11    |
| AC007255.8 | SDC4      | 0.710344709 | 1.20E-68    |
| AC007255.8 | MDK       | 0.653686804 | 7.43E-55    |
| AC007255.8 | KRT19     | 0.24864009  | 1.31E-07    |
| AC007255.8 | MET       | 0.428536815 | 4.91E-21    |
| AC007255.8 | TESC      | 0.753974858 | 8.94E-82    |
| AC007255.8 | CXCL17    | 0.229879562 | 1.13E-06    |
| AC007255.8 | NPC2      | 0.592554286 | 5.82E-43    |
| AC007255.8 | COMP      | 0.45633253  | 5.77E-24    |
| AC007255.8 | TUSC3     | 0.703300643 | 9.37E-67    |
| AC007255.8 | TMPRSS4   | 0.381253434 | 1.23E-16    |
| AC007255.8 | LGALS3    | 0.330239661 | 1.25E-12    |
| AC007255.8 | CRLF1     | 0.411297909 | 2.38E-19    |
| AC007255.8 | CTXN1     | 0.568359962 | 6.36E-39    |
| AC007255.8 | PCSK1N    | 0.471713794 | 1.05E-25    |
| AC007255.8 | NMU       | 0.207860192 | 1.13E-05    |
| AC007255.8 | GALE      | 0.516642888 | 2.52E-31    |
| AC007255.8 | PCSK2     | 0.296412385 | 2.36E-10    |
| AC007255.8 | GJB3      | 0.630951134 | 4.04E-50    |
| AC007255.8 | SLPI      | 0.187792382 | 7.53E-05    |
| AC007255.8 | AGR2      | 0.462560039 | 1.17E-24    |
| AC007255.8 | MRC2      | 0.577394856 | 2.16E-40    |
| AC007255.8 | GOLT1A    | 0.616728257 | 2.36E-47    |
| AC007255.8 | SLC27A6   | 0.478545334 | 1.66E-26    |
| AC007255.8 | KCNN4     | 0.388887402 | 2.67E-17    |
| AC007255.8 | ETV4      | 0.579860364 | 8.43E-41    |
| AC007255.8 | SYT12     | 0.615921982 | 3.36E-47    |
| AC007255.8 | PVRL4     | 0.385150059 | 5.67E-17    |
| AC007255.8 | PLCD3     | 0.47754742  | 2.17E-26    |
| AC007255.8 | PLAU      | 0.395336177 | 7.12E-18    |

|            |          |              |             |
|------------|----------|--------------|-------------|
| AC007255.8 | LRRK2    | 0.637917686  | 1.58E-51    |
| AC007255.8 | SFN      | 0.268153358  | 1.15E-08    |
| AC007255.8 | LPAR5    | 0.610663081  | 3.24E-46    |
| AC007255.8 | NGEF     | 0.411695763  | 2.18E-19    |
| AC007255.8 | DTX4     | 0.479699092  | 1.21E-26    |
| AC007255.8 | CST6     | 0.568405208  | 6.26E-39    |
| AC007255.8 | QPCT     | 0.713334781  | 1.81E-69    |
| AC007255.8 | TIMP1    | 0.617086609  | 2.02E-47    |
| AC007255.8 | CAMK2N1  | 0.642504776  | 1.78E-52    |
| AC007255.8 | KLHDC8A  | 0.627111244  | 2.33E-49    |
| AC007255.8 | PDLIM4   | 0.449997651  | 2.84E-23    |
| AC007255.8 | SCEL     | 0.43528203   | 1.01E-21    |
| AC007255.8 | LCN2     | 0.139143391  | 0.003485865 |
| AC007255.8 | PROS1    | 0.381153722  | 1.25E-16    |
| AC007255.8 | GABRB2   | 0.562091604  | 6.26E-38    |
| AC007255.8 | TMPRSS6  | 0.422671204  | 1.89E-20    |
| AC007255.8 | KLK7     | 0.383212685  | 8.34E-17    |
| AC007255.8 | PDZK1IP1 | 0.264316092  | 1.88E-08    |
| AC007255.8 | CDH3     | 0.680541783  | 5.28E-61    |
| AC007255.8 | LRP4     | 0.790231239  | 5.55E-95    |
| AC007255.8 | IGSF1    | 0.536867399  | 3.85E-34    |
| AC007255.8 | B3GNT3   | 0.205050366  | 1.49E-05    |
| AC007255.8 | CLDN1    | 0.452590082  | 1.48E-23    |
| AC007255.8 | GDF15    | 0.208555662  | 1.05E-05    |
| AC007255.8 | ARHGAP36 | 0.498868329  | 5.30E-29    |
| AC007255.8 | LAMB3    | 0.442302835  | 1.88E-22    |
| AC007255.8 | KLK10    | 0.514231016  | 5.30E-31    |
| AC007255.8 | DPP4     | 0.364969376  | 2.81E-15    |
| AC007255.8 | METTL7B  | 0.611399429  | 2.37E-46    |
| AC007255.8 | LIPH     | 0.49755882   | 7.77E-29    |
| AC007255.8 | CLDN16   | 0.405895113  | 7.67E-19    |
| AC007255.8 | CHI3L1   | 0.309795302  | 3.21E-11    |
| AC007255.8 | SLC22A31 | 0.604662158  | 4.09E-45    |
| AC007255.8 | TACSTD2  | 0.505726593  | 6.98E-30    |
| AC007255.8 | SFTPB    | 0.284970511  | 1.20E-09    |
| AC007255.8 | RXRG     | 0.730627373  | 1.98E-74    |
| AC007255.8 | DCSTAMP  | 0.454050081  | 1.03E-23    |
| AC007255.8 | CITED1   | 0.508430721  | 3.10E-30    |
| AC007255.8 | SERPINA1 | 0.430598633  | 3.04E-21    |
| AC007255.8 | PRR15    | 0.941806032  | 5.08E-209   |
| AC007255.8 | SLC34A2  | 0.233131103  | 7.86E-07    |
| AC007255.8 | FN1      | 0.294782036  | 2.99E-10    |
| AC007255.8 | ZCCHC12  | 0.696020985  | 7.41E-65    |
| TNRC6C-AS1 | TFF3     | -0.524453289 | 0           |
| TNRC6C-AS1 | CCL21    | -0.327004416 | 2.12E-12    |
| TNRC6C-AS1 | TPO      | -0.606056446 | 0           |
| TNRC6C-AS1 | MT1G     | -0.574770011 | 0           |
| TNRC6C-AS1 | DIO1     | -0.6035082   | 0           |
| TNRC6C-AS1 | DPT      | -0.348430057 | 5.63E-14    |
| TNRC6C-AS1 | CDH16    | -0.624491301 | 0           |
| TNRC6C-AS1 | CRABP1   | -0.494462462 | 1.90E-28    |

|            |           |              |          |
|------------|-----------|--------------|----------|
| TNRC6C-AS1 | SLC26A7   | -0.549134935 | 0        |
| TNRC6C-AS1 | MT1H      | -0.567965172 | 7.36E-39 |
| TNRC6C-AS1 | SLC26A4   | -0.494963505 | 0        |
| TNRC6C-AS1 | SLC5A8    | -0.673686668 | 2.26E-59 |
| TNRC6C-AS1 | PKHD1L1   | -0.619886353 | 5.90E-48 |
| TNRC6C-AS1 | TFCP2L1   | -0.6767302   | 0        |
| TNRC6C-AS1 | WSCD2     | -0.574160345 | 7.34E-40 |
| TNRC6C-AS1 | IPCEF1    | -0.576345963 | 0        |
| TNRC6C-AS1 | SLC5A5    | -0.450466008 | 2.52E-23 |
| TNRC6C-AS1 | MT1F      | -0.571874973 | 0        |
| TNRC6C-AS1 | FOSB      | -0.382886074 | 6.24E-18 |
| TNRC6C-AS1 | SEMA3D    | -0.619195196 | 8.01E-48 |
| TNRC6C-AS1 | BMP8A     | -0.45636565  | 0        |
| TNRC6C-AS1 | MATN2     | -0.632105544 | 0        |
| TNRC6C-AS1 | PLA2R1    | -0.621896391 | 0        |
| TNRC6C-AS1 | COL23A1   | -0.514406256 | 0        |
| TNRC6C-AS1 | HGD       | -0.595551704 | 0        |
| TNRC6C-AS1 | TCEAL2    | -0.455232088 | 0        |
| TNRC6C-AS1 | CHRD1     | -0.35477496  | 1.82E-14 |
| TNRC6C-AS1 | TNFRSF11B | -0.604290431 | 0        |
| TNRC6C-AS1 | FAM167A   | -0.558643271 | 0        |
| TNRC6C-AS1 | KIT       | -0.63815277  | 0        |
| TNRC6C-AS1 | SLC4A4    | -0.695583192 | 0        |
| TNRC6C-AS1 | SMOC2     | -0.386640219 | 0        |
| TNRC6C-AS1 | FHL1      | -0.594104823 | 0        |
| TNRC6C-AS1 | OTOS      | -0.556385933 | 0        |
| TNRC6C-AS1 | IGFBPL1   | -0.660642417 | 2.18E-56 |
| TNRC6C-AS1 | HBB       | -0.35579277  | 1.98E-14 |
| TNRC6C-AS1 | BEX1      | -0.314066697 | 2.14E-11 |
| TNRC6C-AS1 | FABP4     | -0.469970026 | 1.67E-25 |
| TNRC6C-AS1 | LMOD1     | -0.51626106  | 0        |
| TNRC6C-AS1 | SOD3      | -0.510015404 | 0        |
| TNRC6C-AS1 | TMEM171   | -0.582957985 | 0        |
| TNRC6C-AS1 | PI16      | -0.305954039 | 7.23E-11 |
| TNRC6C-AS1 | ZMAT4     | -0.595586538 | 1.71E-43 |
| TNRC6C-AS1 | MFAP4     | -0.186677947 | 8.56E-05 |
| TNRC6C-AS1 | CWH43     | -0.641408522 | 3.01E-52 |
| TNRC6C-AS1 | SPX       | -0.535320566 | 0        |
| TNRC6C-AS1 | APOD      | -0.20441383  | 1.65E-05 |
| TNRC6C-AS1 | DPP6      | -0.580334424 | 0        |
| TNRC6C-AS1 | MMRN1     | -0.438890039 | 0        |
| TNRC6C-AS1 | WDR72     | -0.615376563 | 0        |
| TNRC6C-AS1 | MPPED2    | -0.579422127 | 0        |
| TNRC6C-AS1 | PAPSS2    | -0.537719599 | 0        |
| TNRC6C-AS1 | DCN       | -0.245425753 | 2.10E-07 |
| TNRC6C-AS1 | SORBS2    | -0.638611755 | 0        |
| TNRC6C-AS1 | EGR2      | -0.317124139 | 1.34E-11 |
| TNRC6C-AS1 | EDN3      | -0.269992683 | 9.03E-09 |
| TNRC6C-AS1 | DIO2      | -0.565040409 | 0        |
| TNRC6C-AS1 | ITPR1     | -0.575335658 | 0        |
| TNRC6C-AS1 | CFD       | -0.209918529 | 9.64E-06 |



|            |            |              |             |
|------------|------------|--------------|-------------|
| TNRC6C-AS1 | CPXM1      | -0.391765645 | 0           |
| TNRC6C-AS1 | ELM01      | -0.539567595 | 0           |
| TNRC6C-AS1 | GPC3       | -0.426859925 | 7.23E-21    |
| TNRC6C-AS1 | MYOC       | -0.123011956 | 0.009884522 |
| TNRC6C-AS1 | DEPTOR     | -0.671524352 | 0           |
| TNRC6C-AS1 | DGKI       | -0.654302629 | 0           |
| TNRC6C-AS1 | CARTPT     | -0.475303744 | 4.00E-26    |
| TNRC6C-AS1 | IYD        | -0.594275028 | 0           |
| TNRC6C-AS1 | LYVE1      | -0.365354295 | 3.00E-15    |
| TNRC6C-AS1 | CLCNKB     | -0.482579989 | 0           |
| TNRC6C-AS1 | NCAM1      | -0.652095644 | 0           |
| TNRC6C-AS1 | HBA2       | -0.246137491 | 1.93E-07    |
| TNRC6C-AS1 | GLT8D2     | -0.486608305 | 0           |
| TNRC6C-AS1 | OGDHL      | -0.604608572 | 0           |
| TNRC6C-AS1 | LIFR       | -0.566028731 | 0           |
| TNRC6C-AS1 | CSGALNACT1 | -0.605696747 | 0           |
| TNRC6C-AS1 | RAP1GAP    | -0.608252084 | 0           |
| TNRC6C-AS1 | COL9A3     | -0.364605679 | 3.51E-15    |
| TNRC6C-AS1 | FBLN1      | -0.276744951 | 4.30E-09    |
| TNRC6C-AS1 | EFEMP1     | -0.489807158 | 0           |
| TNRC6C-AS1 | AOX1       | -0.584780542 | 1.26E-41    |
| TNRC6C-AS1 | GRIN2C     | -0.532699841 | 0           |
| TNRC6C-AS1 | C11orf74   | -0.533952972 | 0           |
| TNRC6C-AS1 | PPARGC1A   | -0.701073282 | 0           |
| TNRC6C-AS1 | ANGPTL1    | -0.444224108 | 0           |
| TNRC6C-AS1 | SCARA5     | -0.340345889 | 2.29E-13    |
| TNRC6C-AS1 | LTF        | -0.458251942 | 0           |
| TNRC6C-AS1 | CA4        | -0.340008049 | 2.43E-13    |
| TNRC6C-AS1 | TG         | -0.479327238 | 0           |
| TNRC6C-AS1 | FCGBP      | -0.492010031 | 0           |
| TNRC6C-AS1 | PBX4       | -0.356273031 | 1.81E-14    |
| TNRC6C-AS1 | CYR61      | -0.429958413 | 0           |
| TNRC6C-AS1 | FOS        | -0.402339603 | 0           |
| TNRC6C-AS1 | KHDRBS2    | -0.450169212 | 0           |
| TNRC6C-AS1 | MUM1L1     | -0.547044682 | 0           |
| TNRC6C-AS1 | RGS16      | -0.560718348 | 0           |
| TNRC6C-AS1 | MT1M       | -0.546404571 | 0           |
| TNRC6C-AS1 | LRP2       | -0.619566432 | 0           |
| TNRC6C-AS1 | MAFB       | -0.614588091 | 0           |
| TNRC6C-AS1 | KCNK2      | -0.555699867 | 0           |
| TNRC6C-AS1 | TBC1D4     | -0.479622543 | 0           |
| TNRC6C-AS1 | MIOX       | -0.408281175 | 4.59E-19    |
| TNRC6C-AS1 | TPPP       | -0.605922126 | 0           |
| TNRC6C-AS1 | FMOD       | -0.695836797 | 0           |
| TNRC6C-AS1 | CITED2     | -0.573979978 | 0           |
| TNRC6C-AS1 | RGS8       | -0.566825416 | 1.12E-38    |
| TNRC6C-AS1 | ABI3BP     | -0.449733204 | 0           |
| TNRC6C-AS1 | ADH1B      | -0.313818396 | 1.73E-11    |
| TNRC6C-AS1 | OGN        | -0.316291327 | 1.18E-11    |
| TNRC6C-AS1 | NR4A1      | -0.310735794 | 3.55E-11    |
| TNRC6C-AS1 | FOXJ1      | -0.380674312 | 1.38E-16    |

|            |          |              |             |
|------------|----------|--------------|-------------|
| TNRC6C-AS1 | ALDH1A1  | -0.47882783  | 0           |
| TNRC6C-AS1 | OCA2     | -0.479543124 | 1.26E-26    |
| TNRC6C-AS1 | TMEM139  | -0.423549077 | 0           |
| TNRC6C-AS1 | ARHGAP24 | -0.557676651 | 0           |
| TNRC6C-AS1 | SLC25A15 | -0.689906161 | 0           |
| TNRC6C-AS1 | DES      | -0.28985745  | 6.05E-10    |
| TNRC6C-AS1 | GDF10    | -0.419825855 | 3.59E-20    |
| TNRC6C-AS1 | KIAA1324 | -0.489458664 | 0           |
| TNRC6C-AS1 | JUN      | -0.416365877 | 0           |
| TNRC6C-AS1 | C7       | -0.111405975 | 0.019593758 |
| TNRC6C-AS1 | LGI3     | -0.498075837 | 0           |
| TNRC6C-AS1 | CDON     | -0.554078101 | 0           |
| TNRC6C-AS1 | BCL2     | -0.667485965 | 0           |
| TNRC6C-AS1 | HLF      | -0.460557789 | 0           |
| TNRC6C-AS1 | EGR1     | -0.362028498 | 5.93E-15    |
| TNRC6C-AS1 | IP6K3    | -0.565451737 | 0           |
| TNRC6C-AS1 | SCUBE3   | -0.55529166  | 0           |
| TNRC6C-AS1 | PKNOX2   | -0.434628401 | 0           |
| TNRC6C-AS1 | SMAD9    | -0.614562844 | 0           |
| TNRC6C-AS1 | IQGAP2   | -0.670222003 | 0           |
| TNRC6C-AS1 | GNA14    | -0.550184388 | 0           |
| TNRC6C-AS1 | LAYN     | -0.42918143  | 0           |
| TNRC6C-AS1 | AVPR1A   | -0.506198424 | 0           |
| TNRC6C-AS1 | PDLIM3   | -0.535525804 | 0           |
| TNRC6C-AS1 | GPM6A    | -0.56172213  | 0           |
| TNRC6C-AS1 | SDPR     | -0.365714419 | 2.78E-15    |
| TNRC6C-AS1 | CRYAB    | -0.528580324 | 0           |
| TNRC6C-AS1 | FOXA2    | -0.392300725 | 1.33E-17    |
| TNRC6C-AS1 | C8orf88  | -0.543373653 | 0           |
| TNRC6C-AS1 | ISM1     | -0.465833563 | 0           |
| TNRC6C-AS1 | BMP2     | -0.527275139 | 0           |
| TNRC6C-AS1 | ID4      | -0.546576335 | 0           |
| TNRC6C-AS1 | NUPR1    | -0.527455697 | 0           |
| TNRC6C-AS1 | SERTM1   | -0.638233457 | 1.36E-51    |
| TNRC6C-AS1 | IRS1     | -0.522330412 | 0           |
| TNRC6C-AS1 | FIBIN    | -0.526918844 | 0           |
| TNRC6C-AS1 | PODN     | -0.257359078 | 5.05E-08    |
| TNRC6C-AS1 | TDRD9    | -0.531124456 | 0           |
| TNRC6C-AS1 | EPHA3    | -0.355501579 | 2.09E-14    |
| TNRC6C-AS1 | AIF1L    | -0.509179415 | 0           |
| TNRC6C-AS1 | EBF4     | -0.47541225  | 0           |
| TNRC6C-AS1 | ADM2     | -0.554376952 | 0           |
| TNRC6C-AS1 | GSTM3    | -0.528179918 | 0           |
| TNRC6C-AS1 | HSD17B6  | -0.36982954  | 1.13E-15    |
| TNRC6C-AS1 | AGR3     | -0.395667396 | 6.65E-18    |
| TNRC6C-AS1 | EPHB1    | -0.552685686 | 0           |
| TNRC6C-AS1 | TMOD1    | -0.469871382 | 0           |
| TNRC6C-AS1 | WASF3    | -0.599241313 | 0           |
| TNRC6C-AS1 | SELV     | -0.536016933 | 5.11E-34    |
| TNRC6C-AS1 | ENPP1    | -0.470094917 | 0           |
| TNRC6C-AS1 | SYNE1    | -0.581776502 | 4.03E-41    |

|            |          |              |             |
|------------|----------|--------------|-------------|
| TNRC6C-AS1 | PLCH1    | -0.558461578 | 0           |
| TNRC6C-AS1 | CCDC146  | -0.463922733 | 0           |
| TNRC6C-AS1 | SLC16A2  | -0.530747311 | 0           |
| TNRC6C-AS1 | IER2     | -0.299835185 | 1.77E-10    |
| TNRC6C-AS1 | KCNAB1   | -0.3152126   | 1.80E-11    |
| TNRC6C-AS1 | SYNDIG1  | -0.539451573 | 0           |
| TNRC6C-AS1 | C16orf89 | -0.388462117 | 0           |
| TNRC6C-AS1 | CTGF     | -0.341310774 | 2.64E-13    |
| TNRC6C-AS1 | NR4A3    | -0.313534383 | 2.32E-11    |
| TNRC6C-AS1 | KIAA1456 | -0.497610044 | 0           |
| TNRC6C-AS1 | AQP4     | -0.418857956 | 0           |
| TNRC6C-AS1 | RNF150   | -0.60666904  | 0           |
| TNRC6C-AS1 | C1S      | -0.19708468  | 3.32E-05    |
| TNRC6C-AS1 | PFKFB2   | -0.623629073 | 0           |
| TNRC6C-AS1 | PROX1    | -0.540309829 | 0           |
| TNRC6C-AS1 | TCF7L1   | -0.47129798  | 0           |
| TNRC6C-AS1 | HSPB6    | -0.229728779 | 1.23E-06    |
| TNRC6C-AS1 | FHDC1    | -0.429589211 | 0           |
| TNRC6C-AS1 | PRR15L   | -0.5183055   | 0           |
| TNRC6C-AS1 | SLC1A1   | -0.59758267  | 0           |
| TNRC6C-AS1 | BTBD11   | -0.455299603 | 0           |
| TNRC6C-AS1 | TRIM58   | -0.62160605  | 0           |
| TNRC6C-AS1 | LRIG1    | -0.625042055 | 0           |
| TNRC6C-AS1 | ROR2     | -0.473551063 | 0           |
| TNRC6C-AS1 | GPR125   | -0.588402545 | 0           |
| TNRC6C-AS1 | FLRT1    | -0.459050202 | 0           |
| TNRC6C-AS1 | PGF      | -0.460591546 | 0           |
| TNRC6C-AS1 | DUSP1    | -0.405430518 | 0           |
| TNRC6C-AS1 | PLA2G7   | -0.501411279 | 0           |
| TNRC6C-AS1 | PLSCR4   | -0.53359994  | 0           |
| TNRC6C-AS1 | FAM46B   | -0.59854929  | 0           |
| TNRC6C-AS1 | GLDC     | -0.456755703 | 0           |
| TNRC6C-AS1 | ZBTB16   | -0.539652414 | 0           |
| TNRC6C-AS1 | OMD      | -0.276621824 | 3.75E-09    |
| TNRC6C-AS1 | HSD11B2  | -0.315038566 | 1.85E-11    |
| TNRC6C-AS1 | FGL2     | -0.271076572 | 9.01E-09    |
| TNRC6C-AS1 | CLCNKA   | -0.47276899  | 7.91E-26    |
| TNRC6C-AS1 | GATM     | -0.490312098 | 0           |
| TNRC6C-AS1 | TNS3     | -0.609442523 | 0           |
| TNRC6C-AS1 | TOB1     | -0.482307945 | 0           |
| TNRC6C-AS1 | MARC2    | -0.578414233 | 0           |
| TNRC6C-AS1 | LRRC2    | -0.5880949   | 0           |
| TNRC6C-AS1 | SORD     | -0.49374867  | 0           |
| TNRC6C-AS1 | RIMS4    | -0.486950417 | 0           |
| TNRC6C-AS1 | SLC29A4  | -0.473643541 | 0           |
| TNRC6C-AS1 | SLC39A14 | -0.688804512 | 0           |
| TNRC6C-AS1 | FAXDC2   | -0.522236091 | 0           |
| TNRC6C-AS1 | HSPB8    | -0.561079466 | 0           |
| TNRC6C-AS1 | CCL19    | -0.014861557 | 0.756170448 |
| TNRC6C-AS1 | KCNIP3   | -0.377167342 | 1.65E-16    |
| TNRC6C-AS1 | CGNL1    | -0.481688259 | 0           |

|            |          |              |             |
|------------|----------|--------------|-------------|
| TNRC6C-AS1 | ATF3     | -0.259604501 | 3.83E-08    |
| TNRC6C-AS1 | SGCD     | -0.547912016 | 0           |
| TNRC6C-AS1 | STARD13  | -0.583757805 | 0           |
| TNRC6C-AS1 | LDHD     | -0.489355265 | 0           |
| TNRC6C-AS1 | RCAN1    | -0.530158546 | 0           |
| TNRC6C-AS1 | ID3      | -0.47675488  | 0           |
| TNRC6C-AS1 | SYTL3    | -0.55940749  | 0           |
| TNRC6C-AS1 | MT1E     | -0.421397408 | 0           |
| TNRC6C-AS1 | CAMK1D   | -0.436158398 | 0           |
| TNRC6C-AS1 | PRKCQ    | -0.552934468 | 0           |
| TNRC6C-AS1 | NUAK2    | -0.554902317 | 0           |
| TNRC6C-AS1 | LIPG     | -0.404514392 | 0           |
| TNRC6C-AS1 | SLC25A25 | -0.566036815 | 0           |
| TNRC6C-AS1 | PRKX     | -0.500663798 | 0           |
| TNRC6C-AS1 | SRPX     | -0.173839843 | 0.000257524 |
| TNRC6C-AS1 | FAM189A1 | -0.417623973 | 0           |
| TNRC6C-AS1 | PLEKHH1  | -0.382991175 | 5.04E-18    |
| TNRC6C-AS1 | WNT11    | -0.42297719  | 0           |
| TNRC6C-AS1 | SNAI1    | -0.449578035 | 0           |
| TNRC6C-AS1 | FDCSP    | -0.044208974 | 0.355438525 |
| TNRC6C-AS1 | MT1X     | -0.385619133 | 0           |
| TNRC6C-AS1 | ACACB    | -0.584117078 | 0           |
| TNRC6C-AS1 | ARC      | -0.127002102 | 0.007751847 |
| TNRC6C-AS1 | KLK4     | -0.505520841 | 7.43E-30    |
| TNRC6C-AS1 | ZFPM2    | -0.386592987 | 0           |
| TNRC6C-AS1 | AKAP12   | -0.491152625 | 0           |
| TNRC6C-AS1 | GJB6     | -0.541955075 | 7.03E-35    |
| TNRC6C-AS1 | ERO1LB   | -0.56456795  | 0           |
| TNRC6C-AS1 | DNALI1   | -0.388490059 | 0           |
| TNRC6C-AS1 | HKDC1    | -0.524219967 | 0           |
| TNRC6C-AS1 | ZFP36L2  | -0.585247236 | 0           |
| TNRC6C-AS1 | CAPSL    | -0.403284881 | 1.34E-18    |
| TNRC6C-AS1 | CYP7B1   | -0.603331471 | 0           |
| TNRC6C-AS1 | CPQ      | -0.457828417 | 0           |
| TNRC6C-AS1 | RPS6KA6  | -0.547615454 | 1.02E-35    |
| TNRC6C-AS1 | TLE1     | -0.636921907 | 0           |
| TNRC6C-AS1 | TP53INP2 | -0.552851777 | 0           |
| TNRC6C-AS1 | KATNAL2  | -0.503197718 | 0           |
| TNRC6C-AS1 | SGPP2    | -0.506852577 | 0           |
| TNRC6C-AS1 | CTH      | -0.680290596 | 0           |
| TNRC6C-AS1 | KIF12    | -0.285345388 | 1.35E-09    |
| TNRC6C-AS1 | TMEM220  | -0.507048313 | 0           |
| TNRC6C-AS1 | CENPJ    | -0.498203916 | 0           |
| TNRC6C-AS1 | FAM155B  | -0.131463873 | 0.005836137 |
| TNRC6C-AS1 | WFS1     | -0.616058942 | 0           |
| TNRC6C-AS1 | SELENBP1 | -0.31418272  | 2.10E-11    |
| TNRC6C-AS1 | SNTA1    | -0.546310391 | 0           |
| TNRC6C-AS1 | FRAS1    | -0.522221765 | 0           |
| TNRC6C-AS1 | FBLN7    | -0.585270923 | 0           |
| TNRC6C-AS1 | AGPAT9   | -0.548147465 | 0           |
| TNRC6C-AS1 | GPR83    | -0.337711515 | 4.87E-13    |

|            |          |              |             |
|------------|----------|--------------|-------------|
| TNRC6C-AS1 | PRTG     | -0.530013304 | 0           |
| TNRC6C-AS1 | EGR3     | -0.148927711 | 0.001771829 |
| TNRC6C-AS1 | GRAMD2   | -0.507360071 | 0           |
| TNRC6C-AS1 | HYOU1    | -0.637904129 | 0           |
| TNRC6C-AS1 | FBLN5    | -0.29999844  | 1.73E-10    |
| TNRC6C-AS1 | ITM2A    | -0.349648669 | 6.13E-14    |
| TNRC6C-AS1 | SRF      | -0.367404551 | 1.94E-15    |
| TNRC6C-AS1 | FGFR2    | -0.442619221 | 0           |
| TNRC6C-AS1 | MT1A     | -0.38270255  | 9.23E-17    |
| TNRC6C-AS1 | MAMDC2   | -0.349165998 | 6.68E-14    |
| TNRC6C-AS1 | FHL2     | -0.453373454 | 0           |
| TNRC6C-AS1 | FTCDNL1  | -0.630622637 | 0           |
| TNRC6C-AS1 | PKIA     | -0.334251681 | 8.68E-13    |
| TNRC6C-AS1 | DNAJB4   | -0.459711872 | 0           |
| TNRC6C-AS1 | SLC25A33 | -0.555506685 | 0           |
| TNRC6C-AS1 | EYA2     | -0.561428952 | 0           |
| TNRC6C-AS1 | LPAR1    | -0.538633598 | 0           |
| TNRC6C-AS1 | STX11    | -0.4151709   | 0           |
| TNRC6C-AS1 | ARHGEF28 | -0.542145769 | 0           |
| TNRC6C-AS1 | OR2W3    | -0.52649858  | 0           |
| TNRC6C-AS1 | ALDH1B1  | -0.6510899   | 2.71E-54    |
| TNRC6C-AS1 | CXCL12   | -0.197425089 | 3.22E-05    |
| TNRC6C-AS1 | OLFM2    | -0.348003642 | 8.23E-14    |
| TNRC6C-AS1 | TUB      | -0.499851638 | 0           |
| TNRC6C-AS1 | HTRA3    | -0.314581141 | 1.98E-11    |
| TNRC6C-AS1 | CKB      | -0.39548192  | 0           |
| TNRC6C-AS1 | RGS2     | -0.263709977 | 2.30E-08    |
| TNRC6C-AS1 | SHANK2   | -0.532205397 | 0           |
| TNRC6C-AS1 | CNTFR    | -0.356764349 | 1.27E-14    |
| TNRC6C-AS1 | CYTH3    | -0.522905136 | 0           |
| TNRC6C-AS1 | PLAC9    | -0.157882173 | 0.000913958 |
| TNRC6C-AS1 | WVOX     | -0.517576599 | 0           |
| TNRC6C-AS1 | NPR3     | -0.457984012 | 0           |
| TNRC6C-AS1 | SDC2     | -0.41833486  | 0           |
| TNRC6C-AS1 | KLF15    | -0.467392069 | 0           |
| TNRC6C-AS1 | TMEM164  | -0.683094432 | 0           |
| TNRC6C-AS1 | LONRF3   | -0.365986889 | 2.63E-15    |
| TNRC6C-AS1 | GBP1     | -0.241170071 | 3.43E-07    |
| TNRC6C-AS1 | ARHGAP6  | -0.607203624 | 0           |
| TNRC6C-AS1 | TMEM119  | -0.197115175 | 3.31E-05    |
| TNRC6C-AS1 | SH3RF1   | -0.643195647 | 0           |
| TNRC6C-AS1 | CRELD2   | -0.427161527 | 0           |
| TNRC6C-AS1 | PCP4     | -0.23736217  | 5.28E-07    |
| TNRC6C-AS1 | GCSH     | -0.500432887 | 0           |
| TNRC6C-AS1 | IMPA2    | -0.543579459 | 0           |
| TNRC6C-AS1 | C1R      | -0.162444932 | 0.000643581 |
| TNRC6C-AS1 | SUCNR1   | -0.27384807  | 6.28E-09    |
| TNRC6C-AS1 | SFRP1    | -0.390254796 | 0           |
| TNRC6C-AS1 | UGT8     | -0.596517047 | 0           |
| TNRC6C-AS1 | TLE4     | -0.275648408 | 4.96E-09    |
| TNRC6C-AS1 | ANTXR1   | -0.508549091 | 0           |

|            |          |              |             |
|------------|----------|--------------|-------------|
| TNRC6C-AS1 | GPX3     | -0.598985865 | 0           |
| TNRC6C-AS1 | DPY19L2  | -0.35858682  | 1.17E-14    |
| TNRC6C-AS1 | FAM46C   | -0.482286244 | 0           |
| TNRC6C-AS1 | IL33     | -0.255013384 | 6.04E-08    |
| TNRC6C-AS1 | PEG3     | -0.537934341 | 0           |
| TNRC6C-AS1 | FAHD2A   | -0.438853162 | 0           |
| TNRC6C-AS1 | PTGDS    | -0.011653764 | 0.807554165 |
| TNRC6C-AS1 | CHCHD10  | -0.440860441 | 0           |
| TNRC6C-AS1 | CD36     | -0.418824057 | 0           |
| TNRC6C-AS1 | ANKRD37  | -0.341525373 | 2.55E-13    |
| TNRC6C-AS1 | TSPAN33  | -0.481803289 | 0           |
| TNRC6C-AS1 | PRDM16   | -0.45758389  | 0           |
| TNRC6C-AS1 | UST      | -0.369383462 | 1.25E-15    |
| TNRC6C-AS1 | NEXN     | -0.529679703 | 0           |
| TNRC6C-AS1 | NUPR1L   | -0.14500164  | 0.002322392 |
| TNRC6C-AS1 | SLC24A3  | -0.671697961 | 0           |
| TNRC6C-AS1 | MARC1    | -0.434992497 | 0           |
| TNRC6C-AS1 | MYH11    | -0.243702148 | 2.56E-07    |
| TNRC6C-AS1 | APOA1    | -0.39469566  | 8.13E-18    |
| TNRC6C-AS1 | TMEM178B | -0.458327967 | 0           |
| TNRC6C-AS1 | CAPN6    | -0.24084813  | 3.27E-07    |
| TNRC6C-AS1 | PPM1L    | -0.604980895 | 0           |
| TNRC6C-AS1 | FZD8     | -0.546786254 | 0           |
| TNRC6C-AS1 | RCAN2    | -0.508537035 | 0           |
| TNRC6C-AS1 | COPZ2    | -0.595254697 | 0           |
| TNRC6C-AS1 | GAS1     | -0.373775024 | 4.33E-16    |
| TNRC6C-AS1 | DACT1    | -0.493603996 | 0           |
| TNRC6C-AS1 | WBSCR17  | -0.415231606 | 0           |
| TNRC6C-AS1 | NCS1     | -0.400355302 | 0           |
| TNRC6C-AS1 | SPIRE2   | -0.411952757 | 0           |
| TNRC6C-AS1 | C15orf52 | -0.531971366 | 0           |
| TNRC6C-AS1 | SPAG5    | -0.426543543 | 0           |
| TNRC6C-AS1 | ARL4D    | -0.467326115 | 0           |
| TNRC6C-AS1 | FAM189A2 | -0.263009444 | 2.51E-08    |
| TNRC6C-AS1 | MAP1LC3A | -0.37120763  | 8.19E-16    |
| TNRC6C-AS1 | KLF6     | -0.251955367 | 9.71E-08    |
| TNRC6C-AS1 | ADD3     | -0.40419072  | 0           |
| TNRC6C-AS1 | TSPAN7   | -0.299429957 | 1.87E-10    |
| TNRC6C-AS1 | KLF9     | -0.377114153 | 1.68E-16    |
| TNRC6C-AS1 | KCNQ1    | -0.451772113 | 0           |
| TNRC6C-AS1 | MAN1A1   | -0.273723679 | 6.39E-09    |
| TNRC6C-AS1 | MLF1     | -0.362327207 | 5.58E-15    |
| TNRC6C-AS1 | RARB     | -0.490604992 | 0           |
| TNRC6C-AS1 | CDC42EP2 | -0.351670274 | 4.25E-14    |
| TNRC6C-AS1 | FAM3B    | -0.281904986 | 2.16E-09    |
| TNRC6C-AS1 | GADD45B  | -0.288250779 | 9.08E-10    |
| TNRC6C-AS1 | TMEM47   | -0.406919666 | 0           |
| TNRC6C-AS1 | SDF2L1   | -0.332079162 | 1.24E-12    |
| TNRC6C-AS1 | CCDC85A  | -0.515065231 | 0           |
| TNRC6C-AS1 | CRYBG3   | -0.524148197 | 0           |
| TNRC6C-AS1 | FBLN2    | -0.17191639  | 0.000301797 |

|            |          |              |             |
|------------|----------|--------------|-------------|
| TNRC6C-AS1 | PEBP4    | -0.208831205 | 1.07E-05    |
| TNRC6C-AS1 | CDADC1   | -0.450103825 | 0           |
| TNRC6C-AS1 | FAM63A   | -0.5671474   | 0           |
| TNRC6C-AS1 | GLUL     | -0.446394358 | 0           |
| TNRC6C-AS1 | FREM2    | -0.544810747 | 0           |
| TNRC6C-AS1 | ACKR3    | -0.470604822 | 0           |
| TNRC6C-AS1 | DENND6A  | -0.614344415 | 0           |
| TNRC6C-AS1 | CLDN8    | -0.441635581 | 0           |
| TNRC6C-AS1 | UTS2R    | -0.281859262 | 1.84E-09    |
| TNRC6C-AS1 | SCNN1B   | -0.339417248 | 3.65E-13    |
| TNRC6C-AS1 | TTC30A   | -0.667072368 | 0           |
| TNRC6C-AS1 | CORO2B   | -0.404203911 | 0           |
| TNRC6C-AS1 | TC2N     | -0.599481302 | 0           |
| TNRC6C-AS1 | ALDH2    | -0.524147204 | 0           |
| TNRC6C-AS1 | GPR183   | -0.186235841 | 8.90E-05    |
| TNRC6C-AS1 | C4orf47  | -0.317713756 | 1.22E-11    |
| TNRC6C-AS1 | SLC25A42 | -0.333339952 | 1.01E-12    |
| TNRC6C-AS1 | LGMN     | -0.615226783 | 0           |
| TNRC6C-AS1 | ACSF2    | -0.548086759 | 0           |
| TNRC6C-AS1 | KIAA1467 | -0.652825963 | 0           |
| TNRC6C-AS1 | PRKG1    | -0.451754809 | 0           |
| TNRC6C-AS1 | GNAI1    | -0.588309216 | 0           |
| TNRC6C-AS1 | ABCC4    | -0.516973366 | 0           |
| TNRC6C-AS1 | PRPS1    | -0.657807992 | 0           |
| TNRC6C-AS1 | TSPAN5   | -0.627828303 | 0           |
| TNRC6C-AS1 | CR2      | -0.14986173  | 0.001639426 |
| TNRC6C-AS1 | CCDC170  | -0.59911834  | 0           |
| TNRC6C-AS1 | RRAD     | -0.138160287 | 0.003752092 |
| TNRC6C-AS1 | SCGB2A1  | -0.440225152 | 0           |
| TNRC6C-AS1 | SESN3    | -0.367601279 | 1.86E-15    |
| TNRC6C-AS1 | SGK223   | -0.397757555 | 0           |
| TNRC6C-AS1 | NDRG2    | -0.470480289 | 0           |
| TNRC6C-AS1 | C3orf52  | -0.45821932  | 0           |
| TNRC6C-AS1 | FLRT3    | 0.282872032  | 1.89E-09    |
| TNRC6C-AS1 | MST1R    | 0.534312104  | 0           |
| TNRC6C-AS1 | SDC1     | 0.108508668  | 0.023022636 |
| TNRC6C-AS1 | ST8SIA4  | 0.321676118  | 6.59E-12    |
| TNRC6C-AS1 | UBTD1    | 0.595584326  | 0           |
| TNRC6C-AS1 | EPHA2    | 0.403290054  | 0           |
| TNRC6C-AS1 | TMEM130  | 0.494281411  | 0           |
| TNRC6C-AS1 | SPINK2   | 0.441369211  | 0           |
| TNRC6C-AS1 | MMP16    | 0.352669942  | 3.54E-14    |
| TNRC6C-AS1 | SIGLEC15 | 0.576338872  | 0           |
| TNRC6C-AS1 | RIN1     | 0.706298136  | 0           |
| TNRC6C-AS1 | IL1RN    | 0.246302873  | 1.89E-07    |
| TNRC6C-AS1 | FCER1G   | 0.341710045  | 2.47E-13    |
| TNRC6C-AS1 | CD276    | 0.516461901  | 0           |
| TNRC6C-AS1 | CTSB     | 0.360692534  | 7.73E-15    |
| TNRC6C-AS1 | FAM171A2 | 0.498192853  | 0           |
| TNRC6C-AS1 | ASPHD1   | 0.537162463  | 0           |
| TNRC6C-AS1 | C15orf48 | 0.204765869  | 1.60E-05    |

|            |          |             |             |
|------------|----------|-------------|-------------|
| TNRC6C-AS1 | DYSF     | 0.354107178 | 2.72E-14    |
| TNRC6C-AS1 | PDZRN4   | 0.433337116 | 0           |
| TNRC6C-AS1 | EFHD2    | 0.445588723 | 0           |
| TNRC6C-AS1 | ASF1B    | 0.38845233  | 0           |
| TNRC6C-AS1 | AQP1     | 0.367202858 | 2.02E-15    |
| TNRC6C-AS1 | ARRDC2   | 0.681778042 | 0           |
| TNRC6C-AS1 | PRSS1    | 0.479883521 | 1.15E-26    |
| TNRC6C-AS1 | MAPK13   | 0.503786484 | 0           |
| TNRC6C-AS1 | CST5     | 0.344077777 | 1.20E-13    |
| TNRC6C-AS1 | AHR      | 0.30107853  | 1.48E-10    |
| TNRC6C-AS1 | BAX      | 0.467042157 | 0           |
| TNRC6C-AS1 | C1orf115 | 0.483627882 | 0           |
| TNRC6C-AS1 | PLK3     | 0.481428272 | 0           |
| TNRC6C-AS1 | JAG2     | 0.474694128 | 0           |
| TNRC6C-AS1 | RAD23B   | 0.45431043  | 0           |
| TNRC6C-AS1 | CA12     | 0.132668354 | 0.005397882 |
| TNRC6C-AS1 | ADTRP    | 0.468181109 | 0           |
| TNRC6C-AS1 | UCP2     | 0.505933756 | 0           |
| TNRC6C-AS1 | IGFBP2   | 0.340537194 | 3.02E-13    |
| TNRC6C-AS1 | LOXL2    | 0.300629615 | 1.58E-10    |
| TNRC6C-AS1 | GPX1     | 0.514810491 | 0           |
| TNRC6C-AS1 | P3H3     | 0.563204895 | 0           |
| TNRC6C-AS1 | C2orf81  | 0.640639033 | 0           |
| TNRC6C-AS1 | CDT1     | 0.454767713 | 0           |
| TNRC6C-AS1 | SNX25    | 0.446470383 | 0           |
| TNRC6C-AS1 | MTHFD1L  | 0.327177129 | 2.75E-12    |
| TNRC6C-AS1 | CDC42BPG | 0.467156352 | 3.51E-25    |
| TNRC6C-AS1 | MSN      | 0.470936295 | 0           |
| TNRC6C-AS1 | SIGLEC6  | 0.490926377 | 5.24E-28    |
| TNRC6C-AS1 | F2R      | 0.099626259 | 0.036956065 |
| TNRC6C-AS1 | TMEM184A | 0.584647974 | 0           |
| TNRC6C-AS1 | CKS2     | 0.273135338 | 6.90E-09    |
| TNRC6C-AS1 | TAX1BP3  | 0.535183835 | 0           |
| TNRC6C-AS1 | PMEPA1   | 0.448771832 | 0           |
| TNRC6C-AS1 | CXCL16   | 0.378165025 | 1.19E-16    |
| TNRC6C-AS1 | FAXC     | 0.494857978 | 0           |
| TNRC6C-AS1 | VTCN1    | 0.273815326 | 5.46E-09    |
| TNRC6C-AS1 | SH2D4A   | 0.461947651 | 0           |
| TNRC6C-AS1 | RNF24    | 0.387167853 | 0           |
| TNRC6C-AS1 | LY6G6C   | 0.401641624 | 1.90E-18    |
| TNRC6C-AS1 | NID1     | 0.217545962 | 4.45E-06    |
| TNRC6C-AS1 | STAC     | 0.368128204 | 1.65E-15    |
| TNRC6C-AS1 | RAB34    | 0.72654255  | 0           |
| TNRC6C-AS1 | HES4     | 0.463662178 | 0           |
| TNRC6C-AS1 | EPHA10   | 0.521539245 | 0           |
| TNRC6C-AS1 | ENTPD2   | 0.658984815 | 0           |
| TNRC6C-AS1 | DDB2     | 0.526085409 | 0           |
| TNRC6C-AS1 | NKAIN4   | 0.504965718 | 0           |
| TNRC6C-AS1 | TRIM29   | 0.35419072  | 2.68E-14    |
| TNRC6C-AS1 | ADCY8    | 0.536018249 | 5.10E-34    |
| TNRC6C-AS1 | SFTA2    | 0.257803737 | 4.78E-08    |



|            |          |             |             |
|------------|----------|-------------|-------------|
| TNRC6C-AS1 | NRIP1    | 0.376938559 | 1.78E-16    |
| TNRC6C-AS1 | VWA1     | 0.432460846 | 0           |
| TNRC6C-AS1 | APLNR    | 0.281487701 | 2.28E-09    |
| TNRC6C-AS1 | REN      | 0.676500762 | 4.89E-60    |
| TNRC6C-AS1 | EDIL3    | 0.220939558 | 3.13E-06    |
| TNRC6C-AS1 | AGRN     | 0.420146121 | 0           |
| TNRC6C-AS1 | TREM1    | 0.357747853 | 1.37E-14    |
| TNRC6C-AS1 | SRL      | 0.315256995 | 1.78E-11    |
| TNRC6C-AS1 | RASGRF1  | 0.654120652 | 0           |
| TNRC6C-AS1 | RMI2     | 0.516754937 | 0           |
| TNRC6C-AS1 | SAMD1    | 0.605118193 | 0           |
| TNRC6C-AS1 | MGAT4B   | 0.607011009 | 0           |
| TNRC6C-AS1 | NXN      | 0.446420314 | 0           |
| TNRC6C-AS1 | SH3BGRL3 | 0.57353617  | 0           |
| TNRC6C-AS1 | CA11     | 0.633627173 | 0           |
| TNRC6C-AS1 | PLD3     | 0.574149048 | 0           |
| TNRC6C-AS1 | LURAP1L  | 0.248968844 | 1.38E-07    |
| TNRC6C-AS1 | CARNS1   | 0.526891895 | 0           |
| TNRC6C-AS1 | PDLIM7   | 0.64972668  | 0           |
| TNRC6C-AS1 | BCL2L1   | 0.420059316 | 0           |
| TNRC6C-AS1 | GGT6     | 0.402530233 | 0           |
| TNRC6C-AS1 | DPYSL3   | 0.266132839 | 1.70E-08    |
| TNRC6C-AS1 | FYN      | 0.623872182 | 0           |
| TNRC6C-AS1 | TK1      | 0.356258705 | 1.82E-14    |
| TNRC6C-AS1 | AK1      | 0.570323133 | 0           |
| TNRC6C-AS1 | HIGD1B   | 0.382490348 | 1.11E-17    |
| TNRC6C-AS1 | TMEM59L  | 0.372616214 | 5.82E-16    |
| TNRC6C-AS1 | MEGF9    | 0.26509757  | 1.93E-08    |
| TNRC6C-AS1 | ZFP36L1  | 0.275047445 | 5.37E-09    |
| TNRC6C-AS1 | ADRA1B   | 0.422696069 | 0           |
| TNRC6C-AS1 | EPHA4    | 0.38281941  | 7.02E-18    |
| TNRC6C-AS1 | TCERG1L  | 0.370503408 | 9.66E-16    |
| TNRC6C-AS1 | NGFR     | 0.499793911 | 0           |
| TNRC6C-AS1 | EBI3     | 0.490068422 | 0           |
| TNRC6C-AS1 | S100A10  | 0.329241001 | 1.97E-12    |
| TNRC6C-AS1 | S100B    | 0.393782569 | 0           |
| TNRC6C-AS1 | CD44     | 0.481360757 | 0           |
| TNRC6C-AS1 | BHLHE41  | 0.399661718 | 0           |
| TNRC6C-AS1 | FBXO2    | 0.594566929 | 0           |
| TNRC6C-AS1 | SLC30A2  | 0.078548127 | 0.100243022 |
| TNRC6C-AS1 | FRMD5    | 0.346752781 | 1.03E-13    |
| TNRC6C-AS1 | SAMD11   | 0.405701143 | 0           |
| TNRC6C-AS1 | SIP1L2   | 0.4640962   | 0           |
| TNRC6C-AS1 | S100A16  | 0.412871436 | 0           |
| TNRC6C-AS1 | PPL      | 0.312266926 | 2.81E-11    |
| TNRC6C-AS1 | ARHGD1B  | 0.444002275 | 0           |
| TNRC6C-AS1 | CDC42EP3 | 0.352372652 | 3.74E-14    |
| TNRC6C-AS1 | RUNX2    | 0.616071565 | 0           |
| TNRC6C-AS1 | LAMC2    | 0.285368082 | 1.35E-09    |
| TNRC6C-AS1 | BRINP1   | 0.544928472 | 0           |
| TNRC6C-AS1 | GPRC5B   | 0.464951761 | 0           |

|            |          |             |          |
|------------|----------|-------------|----------|
| TNRC6C-AS1 | AQP5     | 0.420189523 | 0        |
| TNRC6C-AS1 | PLAG1    | 0.659613437 | 0        |
| TNRC6C-AS1 | PTPRU    | 0.364429517 | 3.64E-15 |
| TNRC6C-AS1 | ANGPTL4  | 0.312720805 | 2.63E-11 |
| TNRC6C-AS1 | PALM3    | 0.464354485 | 0        |
| TNRC6C-AS1 | ACP5     | 0.365033601 | 3.21E-15 |
| TNRC6C-AS1 | DLG4     | 0.654653109 | 0        |
| TNRC6C-AS1 | ETNK2    | 0.650765779 | 0        |
| TNRC6C-AS1 | CD109    | 0.466738058 | 0        |
| TNRC6C-AS1 | SNX22    | 0.452731925 | 0        |
| TNRC6C-AS1 | TMEM98   | 0.450245946 | 0        |
| TNRC6C-AS1 | CTHRC1   | 0.281088997 | 2.41E-09 |
| TNRC6C-AS1 | S100A2   | 0.305332367 | 7.93E-11 |
| TNRC6C-AS1 | C11orf80 | 0.616919751 | 0        |
| TNRC6C-AS1 | SREBF1   | 0.523789917 | 0        |
| TNRC6C-AS1 | PRSS22   | 0.598618506 | 0        |
| TNRC6C-AS1 | CMTM3    | 0.546330532 | 0        |
| TNRC6C-AS1 | RDH5     | 0.610571121 | 0        |
| TNRC6C-AS1 | MYH10    | 0.383921059 | 0        |
| TNRC6C-AS1 | EVPL     | 0.502986239 | 0        |
| TNRC6C-AS1 | SCD      | 0.34170267  | 2.47E-13 |
| TNRC6C-AS1 | CD151    | 0.647881095 | 0        |
| TNRC6C-AS1 | S100A4   | 0.519337933 | 0        |
| TNRC6C-AS1 | BNIP1    | 0.592213425 | 0        |
| TNRC6C-AS1 | MAP3K6   | 0.553018152 | 0        |
| TNRC6C-AS1 | MANEAL   | 0.400551888 | 0        |
| TNRC6C-AS1 | CD207    | 0.459993745 | 2.26E-24 |
| TNRC6C-AS1 | CD1A     | 0.440154706 | 3.16E-22 |
| TNRC6C-AS1 | C3       | 0.317130521 | 1.34E-11 |
| TNRC6C-AS1 | NT5E     | 0.343743422 | 1.74E-13 |
| TNRC6C-AS1 | CACNG4   | 0.367669905 | 1.69E-15 |
| TNRC6C-AS1 | FHOD1    | 0.629019452 | 0        |
| TNRC6C-AS1 | LEMD1    | 0.51186269  | 0        |
| TNRC6C-AS1 | ATP11A   | 0.421645623 | 0        |
| TNRC6C-AS1 | PPAP2C   | 0.462776547 | 0        |
| TNRC6C-AS1 | DRAM1    | 0.438871742 | 0        |
| TNRC6C-AS1 | CDA      | 0.365628892 | 2.83E-15 |
| TNRC6C-AS1 | CCND2    | 0.535759127 | 0        |
| TNRC6C-AS1 | LCN6     | 0.509745647 | 2.08E-30 |
| TNRC6C-AS1 | CDH4     | 0.375430972 | 2.77E-16 |
| TNRC6C-AS1 | MMP11    | 0.431200339 | 0        |
| TNRC6C-AS1 | B3GAT1   | 0.352800858 | 3.46E-14 |
| TNRC6C-AS1 | SPP1     | 0.221733845 | 2.88E-06 |
| TNRC6C-AS1 | HLA-DQB1 | 0.263278083 | 2.43E-08 |
| TNRC6C-AS1 | SDC3     | 0.630466899 | 0        |
| TNRC6C-AS1 | CX3CL1   | 0.294642102 | 3.71E-10 |
| TNRC6C-AS1 | SDK1     | 0.486510154 | 0        |
| TNRC6C-AS1 | DOCK9    | 0.388090787 | 0        |
| TNRC6C-AS1 | CSF2     | 0.594061918 | 3.17E-43 |
| TNRC6C-AS1 | GRHL3    | 0.500173325 | 0        |
| TNRC6C-AS1 | TMEM92   | 0.571635356 | 1.89E-39 |

|            |          |             |             |
|------------|----------|-------------|-------------|
| TNRC6C-AS1 | BASP1    | 0.566139505 | 0           |
| TNRC6C-AS1 | HRH1     | 0.396904546 | 0           |
| TNRC6C-AS1 | ESM1     | 0.130823762 | 0.006081836 |
| TNRC6C-AS1 | B4GALNT3 | 0.444546362 | 0           |
| TNRC6C-AS1 | LMO3     | 0.36679763  | 2.21E-15    |
| TNRC6C-AS1 | C9orf16  | 0.541944502 | 0           |
| TNRC6C-AS1 | SEMA3F   | 0.549973618 | 0           |
| TNRC6C-AS1 | PLA2G12B | 0.519221666 | 1.13E-31    |
| TNRC6C-AS1 | KLK6     | 0.483669909 | 4.03E-27    |
| TNRC6C-AS1 | ST3GAL5  | 0.672596215 | 0           |
| TNRC6C-AS1 | FAM132B  | 0.349938726 | 5.82E-14    |
| TNRC6C-AS1 | CDKN1A   | 0.121949863 | 0.010583798 |
| TNRC6C-AS1 | E2F1     | 0.428535361 | 0           |
| TNRC6C-AS1 | B3GNT8   | 0.600412179 | 0           |
| TNRC6C-AS1 | MTMR11   | 0.564077903 | 0           |
| TNRC6C-AS1 | MYO1G    | 0.409616132 | 0           |
| TNRC6C-AS1 | TMSB10   | 0.57297563  | 0           |
| TNRC6C-AS1 | UNC5CL   | 0.52902243  | 0           |
| TNRC6C-AS1 | ABR      | 0.486574265 | 0           |
| TNRC6C-AS1 | PLP2     | 0.621802069 | 0           |
| TNRC6C-AS1 | SRCIN1   | 0.517338596 | 0           |
| TNRC6C-AS1 | PDE9A    | 0.54045039  | 0           |
| TNRC6C-AS1 | TREM2    | 0.376129662 | 2.27E-16    |
| TNRC6C-AS1 | KDEL3    | 0.277696111 | 3.79E-09    |
| TNRC6C-AS1 | PC       | 0.499449105 | 0           |
| TNRC6C-AS1 | C2CD4A   | 0.320155624 | 8.37E-12    |
| TNRC6C-AS1 | PELI1    | 0.378247432 | 1.16E-16    |
| TNRC6C-AS1 | SSX1     | 0.335971599 | 6.52E-13    |
| TNRC6C-AS1 | MROH6    | 0.640342735 | 0           |
| TNRC6C-AS1 | ESPN     | 0.678298777 | 0           |
| TNRC6C-AS1 | BMP1     | 0.675904141 | 0           |
| TNRC6C-AS1 | TM4SF4   | 0.505028484 | 8.60E-30    |
| TNRC6C-AS1 | CORO2A   | 0.509558404 | 0           |
| TNRC6C-AS1 | CD164L2  | 0.558707189 | 2.11E-37    |
| TNRC6C-AS1 | CTSS     | 0.32218815  | 6.08E-12    |
| TNRC6C-AS1 | CLU      | 0.52287606  | 0           |
| TNRC6C-AS1 | TMSB4X   | 0.561150952 | 0           |
| TNRC6C-AS1 | WNT10A   | 0.5604398   | 1.13E-37    |
| TNRC6C-AS1 | NAPSA    | 0.447384807 | 0           |
| TNRC6C-AS1 | PLEKHA4  | 0.562368482 | 0           |
| TNRC6C-AS1 | SFTPA1   | 0.326955297 | 2.14E-12    |
| TNRC6C-AS1 | C1orf116 | 0.451750979 | 0           |
| TNRC6C-AS1 | TM4SF1   | 0.360109442 | 8.67E-15    |
| TNRC6C-AS1 | SEL1L3   | 0.351367594 | 4.49E-14    |
| TNRC6C-AS1 | VASN     | 0.623358873 | 0           |
| TNRC6C-AS1 | NPTXR    | 0.446063736 | 0           |
| TNRC6C-AS1 | PDE4C    | 0.497390339 | 0           |
| TNRC6C-AS1 | CDC42EP1 | 0.571976812 | 0           |
| TNRC6C-AS1 | ENDOD1   | 0.478265587 | 0           |
| TNRC6C-AS1 | RYR1     | 0.591668061 | 0           |
| TNRC6C-AS1 | IL1RAP   | 0.458259602 | 0           |

|            |          |             |          |
|------------|----------|-------------|----------|
| TNRC6C-AS1 | SLC35F2  | 0.586649104 | 6.05E-42 |
| TNRC6C-AS1 | ISYNA1   | 0.740217493 | 0        |
| TNRC6C-AS1 | HLA-G    | 0.321944048 | 6.32E-12 |
| TNRC6C-AS1 | CDKN2B   | 0.3398073   | 3.42E-13 |
| TNRC6C-AS1 | ALDH1A3  | 0.261295625 | 3.11E-08 |
| TNRC6C-AS1 | CLIP3    | 0.540808245 | 0        |
| TNRC6C-AS1 | ULBP2    | 0.410396236 | 0        |
| TNRC6C-AS1 | ETHE1    | 0.477432152 | 0        |
| TNRC6C-AS1 | XPR1     | 0.364504123 | 3.58E-15 |
| TNRC6C-AS1 | SPTBN2   | 0.460360777 | 0        |
| TNRC6C-AS1 | IVL      | 0.445696644 | 8.21E-23 |
| TNRC6C-AS1 | MARCO    | 0.337848955 | 4.76E-13 |
| TNRC6C-AS1 | PLXND1   | 0.52123316  | 0        |
| TNRC6C-AS1 | EMILIN2  | 0.524174011 | 0        |
| TNRC6C-AS1 | PLAUR    | 0.395977073 | 0        |
| TNRC6C-AS1 | CDC42EP5 | 0.650820386 | 0        |
| TNRC6C-AS1 | TRPC5    | 0.542771553 | 5.34E-35 |
| TNRC6C-AS1 | TMEM100  | 0.457695515 | 0        |
| TNRC6C-AS1 | QSOX1    | 0.509444509 | 0        |
| TNRC6C-AS1 | ARHGAP23 | 0.571821359 | 0        |
| TNRC6C-AS1 | MDF1     | 0.434207428 | 0        |
| TNRC6C-AS1 | FSTL3    | 0.472536502 | 0        |
| TNRC6C-AS1 | INF2     | 0.643434927 | 0        |
| TNRC6C-AS1 | TGFBR1   | 0.526823813 | 0        |
| TNRC6C-AS1 | TGFBI    | 0.319698057 | 8.99E-12 |
| TNRC6C-AS1 | ERBB3    | 0.447245239 | 0        |
| TNRC6C-AS1 | CCL18    | 0.29832079  | 2.20E-10 |
| TNRC6C-AS1 | CCL17    | 0.367038411 | 1.90E-15 |
| TNRC6C-AS1 | C16orf45 | 0.553910733 | 0        |
| TNRC6C-AS1 | PRDM1    | 0.442225481 | 0        |
| TNRC6C-AS1 | TRIM47   | 0.580710008 | 0        |
| TNRC6C-AS1 | CNFN     | 0.406381678 | 0        |
| TNRC6C-AS1 | ARMCX3   | 0.53451408  | 0        |
| TNRC6C-AS1 | RAMP1    | 0.578474939 | 0        |
| TNRC6C-AS1 | GABRD    | 0.358983538 | 1.08E-14 |
| TNRC6C-AS1 | COL13A1  | 0.473688503 | 0        |
| TNRC6C-AS1 | S100A5   | 0.48973241  | 0        |
| TNRC6C-AS1 | MISP     | 0.339592133 | 3.55E-13 |
| TNRC6C-AS1 | HES6     | 0.455591787 | 0        |
| TNRC6C-AS1 | PSD3     | 0.402152378 | 0        |
| TNRC6C-AS1 | DOK7     | 0.545049033 | 0        |
| TNRC6C-AS1 | ZMAT3    | 0.314707518 | 1.94E-11 |
| TNRC6C-AS1 | MFAP2    | 0.552674339 | 0        |
| TNRC6C-AS1 | TMEM79   | 0.642299662 | 0        |
| TNRC6C-AS1 | SLC1A5   | 0.445023361 | 0        |
| TNRC6C-AS1 | BBC3     | 0.559253738 | 0        |
| TNRC6C-AS1 | HLA-DQB2 | 0.359812718 | 9.18E-15 |
| TNRC6C-AS1 | C1QL1    | 0.524700795 | 0        |
| TNRC6C-AS1 | TMEM215  | 0.369790485 | 1.13E-15 |
| TNRC6C-AS1 | PNP      | 0.441892306 | 0        |
| TNRC6C-AS1 | ARNTL    | 0.47387743  | 0        |

|            |           |             |          |
|------------|-----------|-------------|----------|
| TNRC6C-AS1 | CLDN2     | 0.517067422 | 2.21E-31 |
| TNRC6C-AS1 | MVP       | 0.604258234 | 0        |
| TNRC6C-AS1 | LGALS1    | 0.529620983 | 0        |
| TNRC6C-AS1 | BIRC7     | 0.656085987 | 2.22E-55 |
| TNRC6C-AS1 | COL8A1    | 0.451716229 | 0        |
| TNRC6C-AS1 | PERP      | 0.38265261  | 9.05E-18 |
| TNRC6C-AS1 | GJA4      | 0.432820403 | 0        |
| TNRC6C-AS1 | IGFL2     | 0.512523588 | 8.95E-31 |
| TNRC6C-AS1 | DAPK2     | 0.492213993 | 0        |
| TNRC6C-AS1 | MAMLD1    | 0.563844581 | 0        |
| TNRC6C-AS1 | ETV5      | 0.473963525 | 0        |
| TNRC6C-AS1 | RUNX1     | 0.400287504 | 0        |
| TNRC6C-AS1 | LONRF2    | 0.4056515   | 0        |
| TNRC6C-AS1 | SPOCK1    | 0.306491885 | 6.68E-11 |
| TNRC6C-AS1 | XKRX      | 0.448433693 | 0        |
| TNRC6C-AS1 | TGFB1     | 0.528543162 | 0        |
| TNRC6C-AS1 | ERP27     | 0.234832646 | 7.00E-07 |
| TNRC6C-AS1 | TNFRSF10C | 0.305687243 | 7.52E-11 |
| TNRC6C-AS1 | PALM      | 0.623116048 | 0        |
| TNRC6C-AS1 | TSC22D1   | 0.607508716 | 0        |
| TNRC6C-AS1 | TGM2      | 0.323208526 | 5.18E-12 |
| TNRC6C-AS1 | UBE2QL1   | 0.44649719  | 0        |
| TNRC6C-AS1 | ECE1      | 0.618120828 | 0        |
| TNRC6C-AS1 | COL8A2    | 0.51409549  | 0        |
| TNRC6C-AS1 | HIST3H2A  | 0.416916347 | 0        |
| TNRC6C-AS1 | TNFRSF21  | 0.319090852 | 9.88E-12 |
| TNRC6C-AS1 | SOX4      | 0.411118187 | 0        |
| TNRC6C-AS1 | ELF3      | 0.381309979 | 2.95E-17 |
| TNRC6C-AS1 | TPD52L1   | 0.469374101 | 0        |
| TNRC6C-AS1 | INHBB     | 0.539759501 | 0        |
| TNRC6C-AS1 | HPN       | 0.575079216 | 0        |
| TNRC6C-AS1 | MMP7      | 0.261396565 | 2.73E-08 |
| TNRC6C-AS1 | RAB27A    | 0.552858586 | 0        |
| TNRC6C-AS1 | IGF2BP2   | 0.645197111 | 0        |
| TNRC6C-AS1 | ITGB4     | 0.49284148  | 0        |
| TNRC6C-AS1 | PPP1R1B   | 0.677864614 | 0        |
| TNRC6C-AS1 | NPDC1     | 0.682446095 | 0        |
| TNRC6C-AS1 | CCL13     | 0.423880275 | 1.43E-20 |
| TNRC6C-AS1 | SPINT1    | 0.509225654 | 0        |
| TNRC6C-AS1 | HEY2      | 0.620001305 | 0        |
| TNRC6C-AS1 | CST2      | 0.280157544 | 2.33E-09 |
| TNRC6C-AS1 | ADM       | 0.441801246 | 0        |
| TNRC6C-AS1 | VSTM2L    | 0.251232423 | 1.06E-07 |
| TNRC6C-AS1 | FAM84A    | 0.39472295  | 0        |
| TNRC6C-AS1 | P4HA2     | 0.491699833 | 0        |
| TNRC6C-AS1 | LPL       | 0.496526267 | 0        |
| TNRC6C-AS1 | TMEM173   | 0.616137094 | 0        |
| TNRC6C-AS1 | DHRS3     | 0.659897253 | 0        |
| TNRC6C-AS1 | SCN1B     | 0.644653591 | 0        |
| TNRC6C-AS1 | GLT1D1    | 0.528829106 | 0        |
| TNRC6C-AS1 | PHYHIP    | 0.583255417 | 0        |

|            |            |             |             |
|------------|------------|-------------|-------------|
| TNRC6C-AS1 | BHLHE40    | 0.391190921 | 0           |
| TNRC6C-AS1 | BID        | 0.672811524 | 0           |
| TNRC6C-AS1 | POSTN      | 0.177902059 | 0.000183213 |
| TNRC6C-AS1 | ITGA3      | 0.486775248 | 0           |
| TNRC6C-AS1 | RSP04      | 0.521361523 | 0           |
| TNRC6C-AS1 | ADAMTS9    | 0.533336832 | 0           |
| TNRC6C-AS1 | ABTB2      | 0.461057339 | 0           |
| TNRC6C-AS1 | KCNQ3      | 0.410868979 | 0           |
| TNRC6C-AS1 | ANXA1      | 0.549119475 | 0           |
| TNRC6C-AS1 | S100A11    | 0.559988738 | 0           |
| TNRC6C-AS1 | CEACAM6    | 0.329501965 | 1.41E-12    |
| TNRC6C-AS1 | IER5L      | 0.628003756 | 0           |
| TNRC6C-AS1 | KRT80      | 0.312784064 | 2.60E-11    |
| TNRC6C-AS1 | CDH6       | 0.362585067 | 5.30E-15    |
| TNRC6C-AS1 | UNC5B      | 0.420128107 | 0           |
| TNRC6C-AS1 | PLEKHN1    | 0.681052261 | 0           |
| TNRC6C-AS1 | SYTL1      | 0.63042832  | 0           |
| TNRC6C-AS1 | TMEM163    | 0.404115972 | 0           |
| TNRC6C-AS1 | C4orf48    | 0.459555    | 0           |
| TNRC6C-AS1 | B3GNT7     | 0.53177407  | 0           |
| TNRC6C-AS1 | BAIAP3     | 0.716799615 | 0           |
| TNRC6C-AS1 | PHLDA2     | 0.56932148  | 0           |
| TNRC6C-AS1 | GAP43      | 0.549776792 | 4.86E-36    |
| TNRC6C-AS1 | S100A1     | 0.375868398 | 2.45E-16    |
| TNRC6C-AS1 | PTPRE      | 0.521771858 | 0           |
| TNRC6C-AS1 | CCND1      | 0.458231518 | 0           |
| TNRC6C-AS1 | ST6GALNAC5 | 0.33266476  | 8.37E-13    |
| TNRC6C-AS1 | KRT17      | 0.342905023 | 2.01E-13    |
| TNRC6C-AS1 | HPCAL4     | 0.608427821 | 0           |
| TNRC6C-AS1 | GABBR2     | 0.444449629 | 0           |
| TNRC6C-AS1 | DIRAS3     | 0.591573598 | 0           |
| TNRC6C-AS1 | SERINC2    | 0.452523424 | 0           |
| TNRC6C-AS1 | PTCHD4     | 0.379153204 | 8.29E-17    |
| TNRC6C-AS1 | EPS8       | 0.480967868 | 0           |
| TNRC6C-AS1 | LY6E       | 0.640837747 | 0           |
| TNRC6C-AS1 | UPP1       | 0.559732864 | 0           |
| TNRC6C-AS1 | AHNAK2     | 0.451480921 | 0           |
| TNRC6C-AS1 | PLXNC1     | 0.585888056 | 0           |
| TNRC6C-AS1 | TNC        | 0.317974736 | 1.17E-11    |
| TNRC6C-AS1 | DUSP4      | 0.553860239 | 0           |
| TNRC6C-AS1 | NRCAM      | 0.451361636 | 0           |
| TNRC6C-AS1 | NRP2       | 0.603688758 | 0           |
| TNRC6C-AS1 | CTSC       | 0.571787318 | 0           |
| TNRC6C-AS1 | AMIG02     | 0.60578426  | 0           |
| TNRC6C-AS1 | NAB2       | 0.670233067 | 0           |
| TNRC6C-AS1 | TBC1D2     | 0.470270795 | 0           |
| TNRC6C-AS1 | PHLDA3     | 0.501013001 | 0           |
| TNRC6C-AS1 | PTP4A3     | 0.567465966 | 0           |
| TNRC6C-AS1 | CRABP2     | 0.514938429 | 0           |
| TNRC6C-AS1 | GOS2       | 0.607220787 | 0           |
| TNRC6C-AS1 | S100A6     | 0.534694071 | 0           |

|            |         |             |          |
|------------|---------|-------------|----------|
| TNRC6C-AS1 | FOXQ1   | 0.391424811 | 0        |
| TNRC6C-AS1 | LRG1    | 0.540678464 | 0        |
| TNRC6C-AS1 | LAMP5   | 0.447549054 | 0        |
| TNRC6C-AS1 | ALDH3B1 | 0.517070099 | 0        |
| TNRC6C-AS1 | CDH2    | 0.254043351 | 7.56E-08 |
| TNRC6C-AS1 | SCG5    | 0.483370164 | 0        |
| TNRC6C-AS1 | ZCCHC16 | 0.580230831 | 7.31E-41 |
| TNRC6C-AS1 | GRB7    | 0.612346213 | 0        |
| TNRC6C-AS1 | TIAM1   | 0.459538405 | 0        |
| TNRC6C-AS1 | FXYD5   | 0.66436257  | 0        |
| TNRC6C-AS1 | CLDN9   | 0.53930236  | 0        |
| TNRC6C-AS1 | FAM43A  | 0.597696707 | 0        |
| TNRC6C-AS1 | CHST2   | 0.621921921 | 0        |
| TNRC6C-AS1 | HMGA2   | 0.692871975 | 0        |
| TNRC6C-AS1 | GALNT7  | 0.559947605 | 0        |
| TNRC6C-AS1 | CBLN1   | 0.448954093 | 0        |
| TNRC6C-AS1 | STRA6   | 0.620859136 | 0        |
| TNRC6C-AS1 | MUC21   | 0.461852205 | 1.40E-24 |
| TNRC6C-AS1 | PRR36   | 0.676724952 | 0        |
| TNRC6C-AS1 | NFE2L3  | 0.427358397 | 0        |
| TNRC6C-AS1 | NR1D1   | 0.339255837 | 3.75E-13 |
| TNRC6C-AS1 | MUC1    | 0.340047147 | 3.28E-13 |
| TNRC6C-AS1 | NAT8L   | 0.621702074 | 0        |
| TNRC6C-AS1 | APOC1   | 0.558597741 | 0        |
| TNRC6C-AS1 | EVA1A   | 0.513858055 | 0        |
| TNRC6C-AS1 | ENTPD1  | 0.407338086 | 0        |
| TNRC6C-AS1 | COL1A1  | 0.363120644 | 4.76E-15 |
| TNRC6C-AS1 | FNDC4   | 0.40107087  | 0        |
| TNRC6C-AS1 | FRMD3   | 0.375773509 | 2.52E-16 |
| TNRC6C-AS1 | SHROOM4 | 0.597973431 | 0        |
| TNRC6C-AS1 | NELL2   | 0.624630018 | 0        |
| TNRC6C-AS1 | EPHB3   | 0.546729803 | 0        |
| TNRC6C-AS1 | TMC6    | 0.823105269 | 0        |
| TNRC6C-AS1 | NOD1    | 0.658808653 | 0        |
| TNRC6C-AS1 | GGCT    | 0.651687862 | 0        |
| TNRC6C-AS1 | ICAM1   | 0.481035666 | 0        |
| TNRC6C-AS1 | PRSS23  | 0.526132215 | 0        |
| TNRC6C-AS1 | CFI     | 0.517128252 | 0        |
| TNRC6C-AS1 | CD55    | 0.384269553 | 0        |
| TNRC6C-AS1 | RASD2   | 0.582716153 | 0        |
| TNRC6C-AS1 | KLK11   | 0.469956735 | 1.68E-25 |
| TNRC6C-AS1 | ICAM5   | 0.694543809 | 0        |
| TNRC6C-AS1 | ADORA1  | 0.541510339 | 0        |
| TNRC6C-AS1 | ITGA2   | 0.380765183 | 4.03E-17 |
| TNRC6C-AS1 | ABCC3   | 0.506962076 | 0        |
| TNRC6C-AS1 | MFGE8   | 0.556139988 | 0        |
| TNRC6C-AS1 | STK32A  | 0.411613624 | 0        |
| TNRC6C-AS1 | CYSLTR2 | 0.496915468 | 0        |
| TNRC6C-AS1 | LAD1    | 0.598816227 | 0        |
| TNRC6C-AS1 | MGAT3   | 0.405102733 | 0        |
| TNRC6C-AS1 | IGFBP6  | 0.668068916 | 0        |

|            |           |             |          |
|------------|-----------|-------------|----------|
| TNRC6C-AS1 | CYP2S1    | 0.45161666  | 0        |
| TNRC6C-AS1 | KCNJ2     | 0.599377335 | 0        |
| TNRC6C-AS1 | FAM20A    | 0.576143987 | 0        |
| TNRC6C-AS1 | TGFA      | 0.617194915 | 0        |
| TNRC6C-AS1 | MXRA8     | 0.669179217 | 0        |
| TNRC6C-AS1 | C8orf4    | 0.353137154 | 3.25E-14 |
| TNRC6C-AS1 | CLDN10    | 0.547763751 | 9.74E-36 |
| TNRC6C-AS1 | PDE5A     | 0.54478011  | 0        |
| TNRC6C-AS1 | APOE      | 0.598523334 | 0        |
| TNRC6C-AS1 | SPOCK2    | 0.417024711 | 0        |
| TNRC6C-AS1 | TENM1     | 0.614516463 | 0        |
| TNRC6C-AS1 | SLIT1     | 0.53375284  | 0        |
| TNRC6C-AS1 | CXCL14    | 0.389215414 | 0        |
| TNRC6C-AS1 | ECM1      | 0.422307009 | 0        |
| TNRC6C-AS1 | DUSP5     | 0.44641535  | 0        |
| TNRC6C-AS1 | SEZ6L2    | 0.454878346 | 0        |
| TNRC6C-AS1 | THRSP     | 0.327034015 | 2.82E-12 |
| TNRC6C-AS1 | C19orf33  | 0.456563797 | 0        |
| TNRC6C-AS1 | MPZL2     | 0.524049904 | 0        |
| TNRC6C-AS1 | CTSH      | 0.672455513 | 0        |
| TNRC6C-AS1 | CYP1B1    | 0.525581461 | 0        |
| TNRC6C-AS1 | ALOX5     | 0.347997118 | 8.24E-14 |
| TNRC6C-AS1 | SYTL5     | 0.534184115 | 9.34E-34 |
| TNRC6C-AS1 | TNFRSF12A | 0.595719072 | 0        |
| TNRC6C-AS1 | DUSP6     | 0.529612331 | 0        |
| TNRC6C-AS1 | ALOX15B   | 0.417045703 | 0        |
| TNRC6C-AS1 | SDC4      | 0.67082552  | 0        |
| TNRC6C-AS1 | MDK       | 0.597505794 | 0        |
| TNRC6C-AS1 | KRT19     | 0.450141128 | 0        |
| TNRC6C-AS1 | MET       | 0.492300513 | 0        |
| TNRC6C-AS1 | TESC      | 0.638469209 | 0        |
| TNRC6C-AS1 | CXCL17    | 0.429445404 | 3.97E-21 |
| TNRC6C-AS1 | NPC2      | 0.680962478 | 0        |
| TNRC6C-AS1 | COMP      | 0.476369508 | 0        |
| TNRC6C-AS1 | TUSC3     | 0.544063407 | 0        |
| TNRC6C-AS1 | TMPRSS4   | 0.483796526 | 0        |
| TNRC6C-AS1 | LGALS3    | 0.614689788 | 0        |
| TNRC6C-AS1 | CRLF1     | 0.409146084 | 0        |
| TNRC6C-AS1 | CTXN1     | 0.554093703 | 0        |
| TNRC6C-AS1 | PCSK1N    | 0.399279609 | 0        |
| TNRC6C-AS1 | NMU       | 0.383071935 | 8.58E-17 |
| TNRC6C-AS1 | GALE      | 0.82887804  | 0        |
| TNRC6C-AS1 | PCSK2     | 0.285714022 | 1.29E-09 |
| TNRC6C-AS1 | GJB3      | 0.639715248 | 0        |
| TNRC6C-AS1 | SLPI      | 0.333460088 | 9.90E-13 |
| TNRC6C-AS1 | AGR2      | 0.304355676 | 9.15E-11 |
| TNRC6C-AS1 | MRC2      | 0.532103558 | 0        |
| TNRC6C-AS1 | GOLT1A    | 0.699558177 | 0        |
| TNRC6C-AS1 | SLC27A6   | 0.411617043 | 2.22E-19 |
| TNRC6C-AS1 | KCNN4     | 0.609010629 | 0        |
| TNRC6C-AS1 | ETV4      | 0.639178204 | 8.68E-52 |



|              |          |              |          |
|--------------|----------|--------------|----------|
| TNRC6C-AS1   | SYT12    | 0.659570177  | 0        |
| TNRC6C-AS1   | PVRL4    | 0.566587569  | 0        |
| TNRC6C-AS1   | PLCD3    | 0.575304453  | 0        |
| TNRC6C-AS1   | PLAU     | 0.483386617  | 0        |
| TNRC6C-AS1   | LRRK2    | 0.516190425  | 0        |
| TNRC6C-AS1   | SFN      | 0.431170837  | 0        |
| TNRC6C-AS1   | LPAR5    | 0.591426087  | 0        |
| TNRC6C-AS1   | NGEF     | 0.56425449   | 0        |
| TNRC6C-AS1   | DTX4     | 0.496030688  | 0        |
| TNRC6C-AS1   | CST6     | 0.581863995  | 0        |
| TNRC6C-AS1   | QPCT     | 0.677878372  | 0        |
| TNRC6C-AS1   | TIMP1    | 0.710172701  | 0        |
| TNRC6C-AS1   | CAMK2N1  | 0.665587759  | 0        |
| TNRC6C-AS1   | KLHDC8A  | 0.410657358  | 0        |
| TNRC6C-AS1   | PDLIM4   | 0.597629334  | 0        |
| TNRC6C-AS1   | SCEL     | 0.411476326  | 0        |
| TNRC6C-AS1   | LCN2     | 0.362852855  | 5.02E-15 |
| TNRC6C-AS1   | PROS1    | 0.45133412   | 0        |
| TNRC6C-AS1   | GABRB2   | 0.504379647  | 0        |
| TNRC6C-AS1   | TMPRSS6  | 0.50009035   | 0        |
| TNRC6C-AS1   | KLK7     | 0.423213196  | 1.67E-20 |
| TNRC6C-AS1   | PDZK1IP1 | 0.455391229  | 0        |
| TNRC6C-AS1   | CDH3     | 0.635306382  | 0        |
| TNRC6C-AS1   | LRP4     | 0.629036898  | 0        |
| TNRC6C-AS1   | IGSF1    | 0.37071659   | 9.19E-16 |
| TNRC6C-AS1   | B3GNT3   | 0.421117138  | 0        |
| TNRC6C-AS1   | CLDN1    | 0.470779423  | 0        |
| TNRC6C-AS1   | GDF15    | 0.394587211  | 0        |
| TNRC6C-AS1   | ARHGAP36 | 0.358187938  | 9.80E-15 |
| TNRC6C-AS1   | LAMB3    | 0.49011764   | 0        |
| TNRC6C-AS1   | KLK10    | 0.523732614  | 0        |
| TNRC6C-AS1   | DPP4     | 0.395107896  | 0        |
| TNRC6C-AS1   | METTL7B  | 0.643573501  | 0        |
| TNRC6C-AS1   | LIPH     | 0.593345853  | 0        |
| TNRC6C-AS1   | CLDN16   | 0.454016969  | 0        |
| TNRC6C-AS1   | CHI3L1   | 0.521002817  | 0        |
| TNRC6C-AS1   | SLC22A31 | 0.723565219  | 2.34E-72 |
| TNRC6C-AS1   | TACSTD2  | 0.529072924  | 0        |
| TNRC6C-AS1   | SFTPB    | 0.406129208  | 0        |
| TNRC6C-AS1   | RXRG     | 0.685359146  | 0        |
| TNRC6C-AS1   | DCSTAMP  | 0.525368223  | 1.62E-32 |
| TNRC6C-AS1   | CITED1   | 0.561236621  | 0        |
| TNRC6C-AS1   | SERPINA1 | 0.64292176   | 0        |
| TNRC6C-AS1   | PRR15    | 0.722584443  | 0        |
| TNRC6C-AS1   | SLC34A2  | 0.389997787  | 0        |
| TNRC6C-AS1   | FN1      | 0.422453385  | 0        |
| TNRC6C-AS1   | ZCCHC12  | 0.514129106  | 0        |
| RP11-28001.2 | TFF3     | -0.499309818 | 4.66E-29 |
| RP11-28001.2 | CCL21    | -0.350140614 | 4.16E-14 |
| RP11-28001.2 | TPO      | -0.582775935 | 2.74E-41 |
| RP11-28001.2 | MT1G     | -0.611191706 | 2.59E-46 |

|              |           |              |             |
|--------------|-----------|--------------|-------------|
| RP11-28001.2 | DIO1      | -0.587806919 | 3.84E-42    |
| RP11-28001.2 | DPT       | -0.346287236 | 8.20E-14    |
| RP11-28001.2 | CDH16     | -0.558235028 | 2.50E-37    |
| RP11-28001.2 | CRABP1    | -0.34143686  | 1.90E-13    |
| RP11-28001.2 | SLC26A7   | -0.487310629 | 1.46E-27    |
| RP11-28001.2 | MT1H      | -0.603291147 | 7.25E-45    |
| RP11-28001.2 | SLC26A4   | -0.473006152 | 7.42E-26    |
| RP11-28001.2 | SLC5A8    | -0.630252888 | 5.56E-50    |
| RP11-28001.2 | PKHD1L1   | -0.529744341 | 3.97E-33    |
| RP11-28001.2 | TFCP2L1   | -0.598182066 | 5.96E-44    |
| RP11-28001.2 | WSCD2     | -0.557503165 | 3.24E-37    |
| RP11-28001.2 | IPCEF1    | -0.532814727 | 1.46E-33    |
| RP11-28001.2 | SLC5A5    | -0.476920917 | 2.58E-26    |
| RP11-28001.2 | MT1F      | -0.625684828 | 4.44E-49    |
| RP11-28001.2 | FOSB      | -0.299943974 | 1.41E-10    |
| RP11-28001.2 | SEMA3D    | -0.584005121 | 1.70E-41    |
| RP11-28001.2 | BMP8A     | -0.462976663 | 1.05E-24    |
| RP11-28001.2 | MATN2     | -0.499035362 | 5.05E-29    |
| RP11-28001.2 | PLA2R1    | -0.528405843 | 6.12E-33    |
| RP11-28001.2 | COL23A1   | -0.493686235 | 2.38E-28    |
| RP11-28001.2 | HGD       | -0.640751967 | 4.11E-52    |
| RP11-28001.2 | TCEAL2    | -0.45312504  | 1.30E-23    |
| RP11-28001.2 | CHRD1     | -0.352968464 | 2.52E-14    |
| RP11-28001.2 | TNFRSF11B | -0.55908265  | 1.84E-37    |
| RP11-28001.2 | FAM167A   | -0.501623758 | 2.36E-29    |
| RP11-28001.2 | KIT       | -0.436647325 | 7.31E-22    |
| RP11-28001.2 | SLC4A4    | -0.603268509 | 7.32E-45    |
| RP11-28001.2 | SMOC2     | -0.350115811 | 4.18E-14    |
| RP11-28001.2 | FHL1      | -0.55691849  | 3.98E-37    |
| RP11-28001.2 | OTOS      | -0.620776959 | 3.98E-48    |
| RP11-28001.2 | IGFBPL1   | -0.54044539  | 1.17E-34    |
| RP11-28001.2 | HBB       | -0.314830128 | 1.48E-11    |
| RP11-28001.2 | BEX1      | -0.268413162 | 1.11E-08    |
| RP11-28001.2 | FABP4     | -0.402877236 | 1.46E-18    |
| RP11-28001.2 | LMOD1     | -0.447134239 | 5.76E-23    |
| RP11-28001.2 | SOD3      | -0.61792446  | 1.40E-47    |
| RP11-28001.2 | TMEM171   | -0.585484752 | 9.55E-42    |
| RP11-28001.2 | PI16      | -0.284357709 | 1.31E-09    |
| RP11-28001.2 | ZMAT4     | -0.612528186 | 1.46E-46    |
| RP11-28001.2 | MFAP4     | -0.18692639  | 8.14E-05    |
| RP11-28001.2 | CWH43     | -0.591134099 | 1.03E-42    |
| RP11-28001.2 | SPX       | -0.482955785 | 4.92E-27    |
| RP11-28001.2 | APOD      | -0.175017411 | 0.00022866  |
| RP11-28001.2 | DPP6      | -0.50857707  | 2.97E-30    |
| RP11-28001.2 | MMRN1     | -0.354888083 | 1.78E-14    |
| RP11-28001.2 | WDR72     | -0.404039113 | 1.14E-18    |
| RP11-28001.2 | MPPED2    | -0.560847963 | 9.80E-38    |
| RP11-28001.2 | PAPSS2    | -0.484337001 | 3.35E-27    |
| RP11-28001.2 | DCN       | -0.230540501 | 1.05E-06    |
| RP11-28001.2 | SORBS2    | -0.601465467 | 1.55E-44    |
| RP11-28001.2 | EGR2      | -0.139530744 | 0.003395061 |

|              |            |              |             |
|--------------|------------|--------------|-------------|
| RP11-28001.2 | EDN3       | -0.244841057 | 2.05E-07    |
| RP11-28001.2 | DIO2       | -0.393247389 | 1.10E-17    |
| RP11-28001.2 | ITPR1      | -0.587184961 | 4.90E-42    |
| RP11-28001.2 | CFD        | -0.322965657 | 4.08E-12    |
| RP11-28001.2 | CPXM1      | -0.410743499 | 2.69E-19    |
| RP11-28001.2 | ELM01      | -0.584477987 | 1.41E-41    |
| RP11-28001.2 | GPC3       | -0.419177753 | 4.15E-20    |
| RP11-28001.2 | MYOC       | -0.019957036 | 0.676681566 |
| RP11-28001.2 | DEPTOR     | -0.530740067 | 2.88E-33    |
| RP11-28001.2 | DGKI       | -0.509692623 | 2.12E-30    |
| RP11-28001.2 | CARTPT     | -0.48490807  | 2.86E-27    |
| RP11-28001.2 | IYD        | -0.478158691 | 1.84E-26    |
| RP11-28001.2 | LYVE1      | -0.312388533 | 2.16E-11    |
| RP11-28001.2 | CLCNKB     | -0.432217874 | 2.08E-21    |
| RP11-28001.2 | NCAM1      | -0.663961159 | 3.93E-57    |
| RP11-28001.2 | HBA2       | -0.283872766 | 1.40E-09    |
| RP11-28001.2 | GLT8D2     | -0.476865414 | 2.62E-26    |
| RP11-28001.2 | OGDHL      | -0.577618289 | 1.99E-40    |
| RP11-28001.2 | LIFR       | -0.434991369 | 1.08E-21    |
| RP11-28001.2 | CSGALNACT1 | -0.418737616 | 4.58E-20    |
| RP11-28001.2 | RAP1GAP    | -0.477992315 | 1.93E-26    |
| RP11-28001.2 | COL9A3     | -0.424817774 | 1.16E-20    |
| RP11-28001.2 | FBLN1      | -0.299964541 | 1.40E-10    |
| RP11-28001.2 | EFEMP1     | -0.475770285 | 3.52E-26    |
| RP11-28001.2 | AOX1       | -0.546256851 | 1.63E-35    |
| RP11-28001.2 | GRIN2C     | -0.561563392 | 7.57E-38    |
| RP11-28001.2 | C11orf74   | -0.479765003 | 1.19E-26    |
| RP11-28001.2 | PPARGC1A   | -0.651668508 | 2.03E-54    |
| RP11-28001.2 | ANGPTL1    | -0.382636366 | 9.35E-17    |
| RP11-28001.2 | SCARA5     | -0.313695413 | 1.76E-11    |
| RP11-28001.2 | LTF        | -0.48612444  | 2.03E-27    |
| RP11-28001.2 | CA4        | -0.298700801 | 1.69E-10    |
| RP11-28001.2 | TG         | -0.356360926 | 1.37E-14    |
| RP11-28001.2 | FCGBP      | -0.515409252 | 3.69E-31    |
| RP11-28001.2 | PBX4       | -0.41083385  | 2.63E-19    |
| RP11-28001.2 | CYR61      | -0.318703291 | 8.05E-12    |
| RP11-28001.2 | FOS        | -0.379359489 | 1.79E-16    |
| RP11-28001.2 | KHDRBS2    | -0.438980414 | 4.18E-22    |
| RP11-28001.2 | MUM1L1     | -0.495652106 | 1.35E-28    |
| RP11-28001.2 | RGS16      | -0.501214131 | 2.66E-29    |
| RP11-28001.2 | MT1M       | -0.532549349 | 1.60E-33    |
| RP11-28001.2 | LRP2       | -0.564638718 | 2.49E-38    |
| RP11-28001.2 | MAFB       | -0.580308525 | 7.10E-41    |
| RP11-28001.2 | KCNK2      | -0.504141236 | 1.12E-29    |
| RP11-28001.2 | TBC1D4     | -0.515666829 | 3.41E-31    |
| RP11-28001.2 | MIOX       | -0.490840491 | 5.37E-28    |
| RP11-28001.2 | TPPP       | -0.498291423 | 6.27E-29    |
| RP11-28001.2 | FMOD       | -0.608672385 | 7.56E-46    |
| RP11-28001.2 | CITED2     | -0.507564632 | 4.02E-30    |
| RP11-28001.2 | RGS8       | -0.50056714  | 3.22E-29    |
| RP11-28001.2 | ABI3BP     | -0.373175222 | 5.93E-16    |

|              |          |              |             |
|--------------|----------|--------------|-------------|
| RP11-28001.2 | ADH1B    | -0.322034848 | 4.74E-12    |
| RP11-28001.2 | OGN      | -0.288701756 | 7.12E-10    |
| RP11-28001.2 | NR4A1    | -0.264291783 | 1.89E-08    |
| RP11-28001.2 | FOXJ1    | -0.39559955  | 6.74E-18    |
| RP11-28001.2 | ALDH1A1  | -0.483387823 | 4.36E-27    |
| RP11-28001.2 | OCA2     | -0.401947707 | 1.78E-18    |
| RP11-28001.2 | TMEM139  | -0.380556032 | 1.41E-16    |
| RP11-28001.2 | ARHGAP24 | -0.656588008 | 1.73E-55    |
| RP11-28001.2 | SLC25A15 | -0.548321138 | 8.04E-36    |
| RP11-28001.2 | DES      | -0.246038126 | 1.78E-07    |
| RP11-28001.2 | GDF10    | -0.397281666 | 4.75E-18    |
| RP11-28001.2 | KIAA1324 | -0.551697018 | 2.50E-36    |
| RP11-28001.2 | JUN      | -0.370093372 | 1.07E-15    |
| RP11-28001.2 | C7       | -0.140065189 | 0.003273297 |
| RP11-28001.2 | LGI3     | -0.614235544 | 6.98E-47    |
| RP11-28001.2 | CDON     | -0.582128304 | 3.52E-41    |
| RP11-28001.2 | BCL2     | -0.50797199  | 3.56E-30    |
| RP11-28001.2 | HLF      | -0.474342405 | 5.18E-26    |
| RP11-28001.2 | EGR1     | -0.269705729 | 9.38E-09    |
| RP11-28001.2 | IP6K3    | -0.527007749 | 9.59E-33    |
| RP11-28001.2 | SCUBE3   | -0.392885419 | 1.18E-17    |
| RP11-28001.2 | PKNOX2   | -0.355591173 | 1.57E-14    |
| RP11-28001.2 | SMAD9    | -0.438793897 | 4.38E-22    |
| RP11-28001.2 | IQGAP2   | -0.64425621  | 7.65E-53    |
| RP11-28001.2 | GNA14    | -0.600935562 | 1.93E-44    |
| RP11-28001.2 | LAYN     | -0.392969529 | 1.16E-17    |
| RP11-28001.2 | AVPR1A   | -0.439509185 | 3.69E-22    |
| RP11-28001.2 | PDLIM3   | -0.535241571 | 6.60E-34    |
| RP11-28001.2 | GPM6A    | -0.450248854 | 2.66E-23    |
| RP11-28001.2 | SDPR     | -0.212845109 | 6.84E-06    |
| RP11-28001.2 | CRYAB    | -0.356492551 | 1.33E-14    |
| RP11-28001.2 | FOXA2    | -0.442763822 | 1.68E-22    |
| RP11-28001.2 | C8orf88  | -0.405712515 | 7.98E-19    |
| RP11-28001.2 | ISM1     | -0.536062811 | 5.03E-34    |
| RP11-28001.2 | BMP2     | -0.388531284 | 2.87E-17    |
| RP11-28001.2 | ID4      | -0.453510555 | 1.18E-23    |
| RP11-28001.2 | NUPR1    | -0.517297821 | 2.06E-31    |
| RP11-28001.2 | SERTM1   | -0.615841476 | 3.48E-47    |
| RP11-28001.2 | IRS1     | -0.479483597 | 1.28E-26    |
| RP11-28001.2 | FIBIN    | -0.467420582 | 3.28E-25    |
| RP11-28001.2 | PODN     | -0.24621045  | 1.75E-07    |
| RP11-28001.2 | TDRD9    | -0.473265856 | 6.92E-26    |
| RP11-28001.2 | EPHA3    | -0.349908586 | 4.34E-14    |
| RP11-28001.2 | AIF1L    | -0.368160691 | 1.54E-15    |
| RP11-28001.2 | EBF4     | -0.589703999 | 1.81E-42    |
| RP11-28001.2 | ADM2     | -0.631998309 | 2.49E-50    |
| RP11-28001.2 | GSTM3    | -0.530598796 | 3.01E-33    |
| RP11-28001.2 | HSD17B6  | -0.244479888 | 2.14E-07    |
| RP11-28001.2 | AGR3     | -0.34277657  | 1.51E-13    |
| RP11-28001.2 | EPHB1    | -0.455325227 | 7.45E-24    |
| RP11-28001.2 | TMOD1    | -0.494057424 | 2.14E-28    |

|              |          |              |          |
|--------------|----------|--------------|----------|
| RP11-28001.2 | WASF3    | -0.548550347 | 7.43E-36 |
| RP11-28001.2 | SELV     | -0.572929332 | 1.17E-39 |
| RP11-28001.2 | ENPP1    | -0.369235821 | 1.26E-15 |
| RP11-28001.2 | SYNE1    | -0.546434786 | 1.54E-35 |
| RP11-28001.2 | PLCH1    | -0.538747232 | 2.06E-34 |
| RP11-28001.2 | CCDC146  | -0.472417241 | 8.69E-26 |
| RP11-28001.2 | SLC16A2  | -0.509150094 | 2.50E-30 |
| RP11-28001.2 | IER2     | -0.398102495 | 4.00E-18 |
| RP11-28001.2 | KCNAB1   | -0.339386495 | 2.70E-13 |
| RP11-28001.2 | SYNDIG1  | -0.523863348 | 2.62E-32 |
| RP11-28001.2 | C16orf89 | -0.396214635 | 5.93E-18 |
| RP11-28001.2 | CTGF     | -0.237980458 | 4.54E-07 |
| RP11-28001.2 | NR4A3    | -0.217757375 | 4.13E-06 |
| RP11-28001.2 | KIAA1456 | -0.447390115 | 5.41E-23 |
| RP11-28001.2 | AQP4     | -0.444742146 | 1.04E-22 |
| RP11-28001.2 | RNF150   | -0.516712173 | 2.47E-31 |
| RP11-28001.2 | C1S      | -0.235504538 | 6.02E-07 |
| RP11-28001.2 | PFKFB2   | -0.528554064 | 5.84E-33 |
| RP11-28001.2 | PROX1    | -0.465650588 | 5.22E-25 |
| RP11-28001.2 | TCF7L1   | -0.50310497  | 1.52E-29 |
| RP11-28001.2 | HSPB6    | -0.237379917 | 4.86E-07 |
| RP11-28001.2 | FHDC1    | -0.27417844  | 5.20E-09 |
| RP11-28001.2 | PRR15L   | -0.492259773 | 3.58E-28 |
| RP11-28001.2 | SLC1A1   | -0.505743435 | 6.95E-30 |
| RP11-28001.2 | BTBD11   | -0.396799006 | 5.25E-18 |
| RP11-28001.2 | TRIM58   | -0.491550726 | 4.38E-28 |
| RP11-28001.2 | LRIG1    | -0.487961239 | 1.21E-27 |
| RP11-28001.2 | ROR2     | -0.423358689 | 1.61E-20 |
| RP11-28001.2 | GPR125   | -0.540869976 | 1.01E-34 |
| RP11-28001.2 | FLRT1    | -0.490924087 | 5.24E-28 |
| RP11-28001.2 | PGF      | -0.500487071 | 3.30E-29 |
| RP11-28001.2 | DUSP1    | -0.339251607 | 2.76E-13 |
| RP11-28001.2 | PLA2G7   | -0.353813095 | 2.16E-14 |
| RP11-28001.2 | PLSCR4   | -0.357461019 | 1.12E-14 |
| RP11-28001.2 | FAM46B   | -0.525606534 | 1.50E-32 |
| RP11-28001.2 | GLDC     | -0.541123865 | 9.31E-35 |
| RP11-28001.2 | ZBTB16   | -0.363183037 | 3.91E-15 |
| RP11-28001.2 | OMD      | -0.242747909 | 2.62E-07 |
| RP11-28001.2 | HSD11B2  | -0.328644131 | 1.63E-12 |
| RP11-28001.2 | FGL2     | -0.272175408 | 6.78E-09 |
| RP11-28001.2 | CLCNKA   | -0.538586266 | 2.18E-34 |
| RP11-28001.2 | GATM     | -0.348589778 | 5.47E-14 |
| RP11-28001.2 | TNS3     | -0.459007902 | 2.92E-24 |
| RP11-28001.2 | TOB1     | -0.443359796 | 1.45E-22 |
| RP11-28001.2 | MARC2    | -0.496601284 | 1.03E-28 |
| RP11-28001.2 | LRRC2    | -0.532490203 | 1.63E-33 |
| RP11-28001.2 | SORD     | -0.214323484 | 5.88E-06 |
| RP11-28001.2 | RIMS4    | -0.377095475 | 2.78E-16 |
| RP11-28001.2 | SLC29A4  | -0.51449454  | 4.89E-31 |
| RP11-28001.2 | SLC39A14 | -0.539095728 | 1.84E-34 |
| RP11-28001.2 | FAXDC2   | -0.415212664 | 1.00E-19 |

|              |          |              |             |
|--------------|----------|--------------|-------------|
| RP11-28001.2 | HSPB8    | -0.489288272 | 8.34E-28    |
| RP11-28001.2 | CCL19    | -0.090557787 | 0.057975433 |
| RP11-28001.2 | KCNIP3   | -0.465573287 | 5.32E-25    |
| RP11-28001.2 | CGNL1    | -0.461073059 | 1.71E-24    |
| RP11-28001.2 | ATF3     | -0.160589534 | 0.000732613 |
| RP11-28001.2 | SGCD     | -0.502683144 | 1.73E-29    |
| RP11-28001.2 | STARD13  | -0.493788642 | 2.31E-28    |
| RP11-28001.2 | LDHD     | -0.483409098 | 4.34E-27    |
| RP11-28001.2 | RCAN1    | -0.411167169 | 2.45E-19    |
| RP11-28001.2 | ID3      | -0.5267462   | 1.04E-32    |
| RP11-28001.2 | SYTL3    | -0.469616371 | 1.83E-25    |
| RP11-28001.2 | MT1E     | -0.535400997 | 6.26E-34    |
| RP11-28001.2 | CAMK1D   | -0.399747245 | 2.83E-18    |
| RP11-28001.2 | PRKCQ    | -0.389425997 | 2.39E-17    |
| RP11-28001.2 | NUAK2    | -0.486331807 | 1.92E-27    |
| RP11-28001.2 | LIPG     | -0.308938898 | 3.66E-11    |
| RP11-28001.2 | SLC25A25 | -0.408191697 | 4.68E-19    |
| RP11-28001.2 | PRKX     | -0.204100529 | 1.64E-05    |
| RP11-28001.2 | SRPX     | -0.287010784 | 9.03E-10    |
| RP11-28001.2 | FAM189A1 | -0.393464685 | 1.05E-17    |
| RP11-28001.2 | PLEKHH1  | -0.330106194 | 1.28E-12    |
| RP11-28001.2 | WNT11    | -0.415813915 | 8.79E-20    |
| RP11-28001.2 | SNAI1    | -0.41566073  | 9.10E-20    |
| RP11-28001.2 | FDCSP    | -0.126394103 | 0.008017285 |
| RP11-28001.2 | MT1X     | -0.390961816 | 1.75E-17    |
| RP11-28001.2 | ACACB    | -0.557283864 | 3.50E-37    |
| RP11-28001.2 | ARC      | 0.026549613  | 0.579039705 |
| RP11-28001.2 | KLK4     | -0.426573081 | 7.72E-21    |
| RP11-28001.2 | ZFPM2    | -0.323499818 | 3.75E-12    |
| RP11-28001.2 | AKAP12   | -0.250607562 | 1.03E-07    |
| RP11-28001.2 | GJB6     | -0.359272906 | 8.04E-15    |
| RP11-28001.2 | ERO1LB   | -0.450334666 | 2.61E-23    |
| RP11-28001.2 | DNALI1   | -0.434733083 | 1.15E-21    |
| RP11-28001.2 | HKDC1    | -0.572327742 | 1.46E-39    |
| RP11-28001.2 | ZFP36L2  | -0.433869149 | 1.41E-21    |
| RP11-28001.2 | CAPSL    | -0.496878414 | 9.46E-29    |
| RP11-28001.2 | CYP7B1   | -0.484354163 | 3.33E-27    |
| RP11-28001.2 | CPQ      | -0.40893209  | 3.98E-19    |
| RP11-28001.2 | RPS6KA6  | -0.40794463  | 4.93E-19    |
| RP11-28001.2 | TLE1     | -0.613217007 | 1.08E-46    |
| RP11-28001.2 | TP53INP2 | -0.462133013 | 1.30E-24    |
| RP11-28001.2 | KATNAL2  | -0.536697535 | 4.08E-34    |
| RP11-28001.2 | SGPP2    | -0.440892103 | 2.64E-22    |
| RP11-28001.2 | CTH      | -0.562012025 | 6.44E-38    |
| RP11-28001.2 | KIF12    | -0.260829382 | 2.93E-08    |
| RP11-28001.2 | TMEM220  | -0.471738122 | 1.04E-25    |
| RP11-28001.2 | CENPJ    | -0.527411419 | 8.43E-33    |
| RP11-28001.2 | FAM155B  | -0.269480775 | 9.66E-09    |
| RP11-28001.2 | WFS1     | -0.615609526 | 3.84E-47    |
| RP11-28001.2 | SELENBP1 | -0.34717055  | 7.02E-14    |
| RP11-28001.2 | SNTA1    | -0.567316756 | 9.34E-39    |

|              |          |              |             |
|--------------|----------|--------------|-------------|
| RP11-28001.2 | FRAS1    | -0.375427322 | 3.84E-16    |
| RP11-28001.2 | FBLN7    | -0.627993521 | 1.56E-49    |
| RP11-28001.2 | AGPAT9   | -0.354113082 | 2.05E-14    |
| RP11-28001.2 | GPR83    | -0.295124328 | 2.85E-10    |
| RP11-28001.2 | PRTG     | -0.401811552 | 1.83E-18    |
| RP11-28001.2 | EGR3     | -0.052969869 | 0.268097112 |
| RP11-28001.2 | GRAMD2   | -0.482702746 | 5.27E-27    |
| RP11-28001.2 | HYOU1    | -0.581465212 | 4.55E-41    |
| RP11-28001.2 | FBLN5    | -0.299551225 | 1.49E-10    |
| RP11-28001.2 | ITM2A    | -0.365778952 | 2.41E-15    |
| RP11-28001.2 | SRF      | -0.361935716 | 4.93E-15    |
| RP11-28001.2 | FGFR2    | -0.199430947 | 2.57E-05    |
| RP11-28001.2 | MT1A     | -0.34194604  | 1.74E-13    |
| RP11-28001.2 | MAMDC2   | -0.300564798 | 1.29E-10    |
| RP11-28001.2 | FHL2     | -0.482727852 | 5.24E-27    |
| RP11-28001.2 | FTCDNL1  | -0.495389706 | 1.46E-28    |
| RP11-28001.2 | PKIA     | -0.150446718 | 0.001571031 |
| RP11-28001.2 | DNAJB4   | -0.231961431 | 8.95E-07    |
| RP11-28001.2 | SLC25A33 | -0.580419017 | 6.80E-41    |
| RP11-28001.2 | EYA2     | -0.437882306 | 5.44E-22    |
| RP11-28001.2 | LPAR1    | -0.483268821 | 4.51E-27    |
| RP11-28001.2 | STX11    | -0.41109781  | 2.49E-19    |
| RP11-28001.2 | ARHGEF28 | -0.563715071 | 3.48E-38    |
| RP11-28001.2 | OR2W3    | -0.476298347 | 3.05E-26    |
| RP11-28001.2 | ALDH1B1  | -0.613722894 | 8.71E-47    |
| RP11-28001.2 | CXCL12   | -0.25208083  | 8.64E-08    |
| RP11-28001.2 | OLFM2    | -0.386717463 | 4.14E-17    |
| RP11-28001.2 | TUB      | -0.248834732 | 1.28E-07    |
| RP11-28001.2 | HTRA3    | -0.275781916 | 4.20E-09    |
| RP11-28001.2 | CKB      | -0.519556587 | 1.02E-31    |
| RP11-28001.2 | RGS2     | -0.253867702 | 6.95E-08    |
| RP11-28001.2 | SHANK2   | -0.446823048 | 6.22E-23    |
| RP11-28001.2 | CNTFR    | -0.438378965 | 4.83E-22    |
| RP11-28001.2 | CYTH3    | -0.408484308 | 4.39E-19    |
| RP11-28001.2 | PLAC9    | -0.235844807 | 5.79E-07    |
| RP11-28001.2 | WVOX     | -0.462250454 | 1.26E-24    |
| RP11-28001.2 | NPR3     | -0.411737214 | 2.16E-19    |
| RP11-28001.2 | SDC2     | -0.269776081 | 9.29E-09    |
| RP11-28001.2 | KLF15    | -0.342913149 | 1.47E-13    |
| RP11-28001.2 | TMEM164  | -0.629041985 | 9.68E-50    |
| RP11-28001.2 | LONRF3   | -0.144955045 | 0.002330042 |
| RP11-28001.2 | GBP1     | -0.27320288  | 5.92E-09    |
| RP11-28001.2 | ARHGAP6  | -0.401250441 | 2.06E-18    |
| RP11-28001.2 | TMEM119  | -0.239254302 | 3.93E-07    |
| RP11-28001.2 | SH3RF1   | -0.387609623 | 3.46E-17    |
| RP11-28001.2 | CRELD2   | -0.511044195 | 1.41E-30    |
| RP11-28001.2 | PCP4     | -0.101947574 | 0.032718923 |
| RP11-28001.2 | GCSH     | -0.454162441 | 1.00E-23    |
| RP11-28001.2 | IMPA2    | -0.389430961 | 2.39E-17    |
| RP11-28001.2 | C1R      | -0.214552835 | 5.75E-06    |
| RP11-28001.2 | SUCNR1   | -0.282397086 | 1.71E-09    |

|              |          |              |             |
|--------------|----------|--------------|-------------|
| RP11-28001.2 | SFRP1    | -0.403834583 | 1.19E-18    |
| RP11-28001.2 | UGT8     | -0.581741654 | 4.09E-41    |
| RP11-28001.2 | TLE4     | -0.250130278 | 1.09E-07    |
| RP11-28001.2 | ANTXR1   | -0.453420346 | 1.20E-23    |
| RP11-28001.2 | GPX3     | -0.501179664 | 2.69E-29    |
| RP11-28001.2 | DPY19L2  | -0.46246548  | 1.20E-24    |
| RP11-28001.2 | FAM46C   | -0.42895901  | 4.45E-21    |
| RP11-28001.2 | IL33     | -0.259499308 | 3.46E-08    |
| RP11-28001.2 | PEG3     | -0.420379955 | 3.17E-20    |
| RP11-28001.2 | FAHD2A   | -0.499859581 | 3.97E-29    |
| RP11-28001.2 | PTGDS    | -0.041425271 | 0.386570843 |
| RP11-28001.2 | CHCHD10  | -0.545368927 | 2.21E-35    |
| RP11-28001.2 | CD36     | -0.387488068 | 3.54E-17    |
| RP11-28001.2 | ANKRD37  | -0.365385352 | 2.60E-15    |
| RP11-28001.2 | TSPAN33  | -0.531803141 | 2.04E-33    |
| RP11-28001.2 | PRDM16   | -0.338834321 | 2.96E-13    |
| RP11-28001.2 | UST      | -0.324930393 | 2.98E-12    |
| RP11-28001.2 | NEXN     | -0.450909251 | 2.26E-23    |
| RP11-28001.2 | NUPR1L   | -0.202909448 | 1.84E-05    |
| RP11-28001.2 | SLC24A3  | -0.695940462 | 7.77E-65    |
| RP11-28001.2 | MARC1    | -0.441501721 | 2.28E-22    |
| RP11-28001.2 | MYH11    | -0.189150832 | 6.67E-05    |
| RP11-28001.2 | APOA1    | -0.430047063 | 3.46E-21    |
| RP11-28001.2 | TMEM178B | -0.5240588   | 2.46E-32    |
| RP11-28001.2 | CAPN6    | -0.308097167 | 4.16E-11    |
| RP11-28001.2 | PPM1L    | -0.596492211 | 1.19E-43    |
| RP11-28001.2 | FZD8     | -0.554303853 | 1.00E-36    |
| RP11-28001.2 | RCAN2    | -0.527970543 | 7.04E-33    |
| RP11-28001.2 | COPZ2    | -0.626484509 | 3.09E-49    |
| RP11-28001.2 | GAS1     | -0.382046889 | 1.05E-16    |
| RP11-28001.2 | DACT1    | -0.42886639  | 4.55E-21    |
| RP11-28001.2 | WBSCR17  | -0.391359245 | 1.61E-17    |
| RP11-28001.2 | NCS1     | -0.395159078 | 7.39E-18    |
| RP11-28001.2 | SPIRE2   | -0.400606782 | 2.37E-18    |
| RP11-28001.2 | C15orf52 | -0.682218371 | 2.07E-61    |
| RP11-28001.2 | SPAG5    | -0.52774644  | 7.57E-33    |
| RP11-28001.2 | ARL4D    | -0.548393617 | 7.84E-36    |
| RP11-28001.2 | FAM189A2 | -0.177013351 | 0.0001932   |
| RP11-28001.2 | MAP1LC3A | -0.468430324 | 2.51E-25    |
| RP11-28001.2 | KLF6     | -0.099798023 | 0.036594463 |
| RP11-28001.2 | ADD3     | -0.203754587 | 1.69E-05    |
| RP11-28001.2 | TSPAN7   | -0.229295733 | 1.20E-06    |
| RP11-28001.2 | KLF9     | -0.237177798 | 4.98E-07    |
| RP11-28001.2 | KCNQ1    | -0.4939953   | 2.18E-28    |
| RP11-28001.2 | MAN1A1   | -0.313379554 | 1.85E-11    |
| RP11-28001.2 | MLF1     | -0.213290905 | 6.54E-06    |
| RP11-28001.2 | RARB     | -0.443580637 | 1.38E-22    |
| RP11-28001.2 | CDC42EP2 | -0.425584691 | 9.69E-21    |
| RP11-28001.2 | FAM3B    | -0.21992579  | 3.29E-06    |
| RP11-28001.2 | GADD45B  | -0.316490622 | 1.14E-11    |
| RP11-28001.2 | TMEM47   | -0.399178334 | 3.19E-18    |



|              |          |              |             |
|--------------|----------|--------------|-------------|
| RP11-28001.2 | SDF2L1   | -0.431319332 | 2.57E-21    |
| RP11-28001.2 | CCDC85A  | -0.314747862 | 1.50E-11    |
| RP11-28001.2 | CRYBG3   | -0.315552224 | 1.32E-11    |
| RP11-28001.2 | FBLN2    | -0.154468669 | 0.001167276 |
| RP11-28001.2 | PEBP4    | -0.266379634 | 1.44E-08    |
| RP11-28001.2 | CDADC1   | -0.43348718  | 1.54E-21    |
| RP11-28001.2 | FAM63A   | -0.443868993 | 1.28E-22    |
| RP11-28001.2 | GLUL     | -0.402891646 | 1.46E-18    |
| RP11-28001.2 | FREM2    | -0.515897741 | 3.17E-31    |
| RP11-28001.2 | ACKR3    | -0.356891399 | 1.24E-14    |
| RP11-28001.2 | DENND6A  | -0.48473826  | 2.99E-27    |
| RP11-28001.2 | CLDN8    | -0.341070534 | 2.02E-13    |
| RP11-28001.2 | UTS2R    | -0.159234426 | 0.000813363 |
| RP11-28001.2 | SCNN1B   | -0.224143903 | 2.10E-06    |
| RP11-28001.2 | TTC30A   | -0.574260564 | 7.07E-40    |
| RP11-28001.2 | CORO2B   | -0.408595367 | 4.29E-19    |
| RP11-28001.2 | TC2N     | -0.568097289 | 7.01E-39    |
| RP11-28001.2 | ALDH2    | -0.605698473 | 2.65E-45    |
| RP11-28001.2 | GPR183   | -0.143413268 | 0.002596541 |
| RP11-28001.2 | C4orf47  | -0.344222878 | 1.17E-13    |
| RP11-28001.2 | SLC25A42 | -0.37986202  | 1.62E-16    |
| RP11-28001.2 | LGMN     | -0.620762917 | 4.01E-48    |
| RP11-28001.2 | ACSF2    | -0.66927355  | 2.40E-58    |
| RP11-28001.2 | KIAA1467 | -0.496712485 | 9.93E-29    |
| RP11-28001.2 | PRKG1    | -0.453307869 | 1.24E-23    |
| RP11-28001.2 | GNAI1    | -0.534002335 | 9.92E-34    |
| RP11-28001.2 | ABCC4    | -0.495443179 | 1.43E-28    |
| RP11-28001.2 | PRPS1    | -0.552860087 | 1.66E-36    |
| RP11-28001.2 | TSPAN5   | -0.470501723 | 1.45E-25    |
| RP11-28001.2 | CR2      | -0.262529912 | 2.36E-08    |
| RP11-28001.2 | CCDC170  | -0.462519946 | 1.18E-24    |
| RP11-28001.2 | RRAD     | -0.232661259 | 8.28E-07    |
| RP11-28001.2 | SCGB2A1  | -0.493332775 | 2.63E-28    |
| RP11-28001.2 | SESN3    | -0.338466961 | 3.15E-13    |
| RP11-28001.2 | SGK223   | -0.295193403 | 2.82E-10    |
| RP11-28001.2 | NDRG2    | -0.478985038 | 1.47E-26    |
| RP11-28001.2 | C3orf52  | -0.459714112 | 2.43E-24    |
| RP11-28001.2 | FLRT3    | 0.243765735  | 2.33E-07    |
| RP11-28001.2 | MST1R    | 0.487948048  | 1.22E-27    |
| RP11-28001.2 | SDC1     | 0.026607908  | 0.578206382 |
| RP11-28001.2 | ST8SIA4  | 0.294152172  | 3.27E-10    |
| RP11-28001.2 | UBTD1    | 0.51051897   | 1.65E-30    |
| RP11-28001.2 | EPHA2    | 0.356930688  | 1.23E-14    |
| RP11-28001.2 | TMEM130  | 0.549445344  | 5.45E-36    |
| RP11-28001.2 | SPINK2   | 0.28909821   | 6.73E-10    |
| RP11-28001.2 | MMP16    | 0.391347047  | 1.62E-17    |
| RP11-28001.2 | SIGLEC15 | 0.570412507  | 2.98E-39    |
| RP11-28001.2 | RIN1     | 0.643543192  | 1.08E-52    |
| RP11-28001.2 | IL1RN    | 0.22678407   | 1.58E-06    |
| RP11-28001.2 | FCER1G   | 0.18031661   | 0.000145598 |
| RP11-28001.2 | CD276    | 0.536301382  | 4.65E-34    |

|              |          |              |             |
|--------------|----------|--------------|-------------|
| RP11-28001.2 | CTSB     | 0.463358491  | 9.49E-25    |
| RP11-28001.2 | FAM171A2 | 0.450825283  | 2.31E-23    |
| RP11-28001.2 | ASPHD1   | 0.542996407  | 4.95E-35    |
| RP11-28001.2 | C15orf48 | 0.18554404   | 9.21E-05    |
| RP11-28001.2 | DYSF     | 0.33729992   | 3.84E-13    |
| RP11-28001.2 | PDZRN4   | 0.483586537  | 4.13E-27    |
| RP11-28001.2 | EFHD2    | 0.311602752  | 2.44E-11    |
| RP11-28001.2 | ASF1B    | 0.191384492  | 5.44E-05    |
| RP11-28001.2 | AQP1     | 0.351820416  | 3.09E-14    |
| RP11-28001.2 | ARRDC2   | 0.626392031  | 3.23E-49    |
| RP11-28001.2 | PRSS1    | 0.555099068  | 7.58E-37    |
| RP11-28001.2 | MAPK13   | 0.396796737  | 5.26E-18    |
| RP11-28001.2 | CST5     | 0.434810624  | 1.13E-21    |
| RP11-28001.2 | AHR      | 0.365382799  | 2.60E-15    |
| RP11-28001.2 | BAX      | 0.238858859  | 4.11E-07    |
| RP11-28001.2 | C1orf115 | 0.656149871  | 2.15E-55    |
| RP11-28001.2 | PLK3     | 0.365540948  | 2.52E-15    |
| RP11-28001.2 | JAG2     | 0.363900594  | 3.42E-15    |
| RP11-28001.2 | RAD23B   | 0.685565316  | 3.15E-62    |
| RP11-28001.2 | CA12     | -0.022463409 | 0.638799457 |
| RP11-28001.2 | ADTRP    | 0.722921687  | 3.58E-72    |
| RP11-28001.2 | UCP2     | 0.628375632  | 1.31E-49    |
| RP11-28001.2 | IGFBP2   | 0.294144938  | 3.28E-10    |
| RP11-28001.2 | LOXL2    | 0.282200783  | 1.76E-09    |
| RP11-28001.2 | GPX1     | 0.228644272  | 1.29E-06    |
| RP11-28001.2 | P3H3     | 0.456204904  | 5.96E-24    |
| RP11-28001.2 | C2orf81  | 0.684144952  | 7.03E-62    |
| RP11-28001.2 | CDT1     | 0.322305119  | 4.54E-12    |
| RP11-28001.2 | SNX25    | 0.488258672  | 1.12E-27    |
| RP11-28001.2 | MTHFD1L  | 0.360209126  | 6.77E-15    |
| RP11-28001.2 | CDC42BPG | 0.515661103  | 3.41E-31    |
| RP11-28001.2 | MSN      | 0.5841502    | 1.61E-41    |
| RP11-28001.2 | SIGLEC6  | 0.605286294  | 3.15E-45    |
| RP11-28001.2 | F2R      | 0.113309769  | 0.017549528 |
| RP11-28001.2 | TMEM184A | 0.436253158  | 8.03E-22    |
| RP11-28001.2 | CKS2     | 0.104892693  | 0.02798153  |
| RP11-28001.2 | TAX1BP3  | 0.416189501  | 8.09E-20    |
| RP11-28001.2 | PMEP1    | 0.441409101  | 2.33E-22    |
| RP11-28001.2 | CXCL16   | 0.350261478  | 4.07E-14    |
| RP11-28001.2 | FAXC     | 0.455446782  | 7.22E-24    |
| RP11-28001.2 | VTCN1    | 0.346657017  | 7.68E-14    |
| RP11-28001.2 | SH2D4A   | 0.479388424  | 1.31E-26    |
| RP11-28001.2 | RNF24    | 0.484017724  | 3.66E-27    |
| RP11-28001.2 | LY6G6C   | 0.555114866  | 7.54E-37    |
| RP11-28001.2 | NID1     | 0.262999783  | 2.23E-08    |
| RP11-28001.2 | STAC     | 0.447697193  | 5.02E-23    |
| RP11-28001.2 | RAB34    | 0.679583876  | 8.98E-61    |
| RP11-28001.2 | HES4     | 0.324175533  | 3.36E-12    |
| RP11-28001.2 | EPHA10   | 0.67059335   | 1.19E-58    |
| RP11-28001.2 | ENTPD2   | 0.735706373  | 5.83E-76    |
| RP11-28001.2 | DDB2     | 0.428053376  | 5.49E-21    |

|              |          |             |             |
|--------------|----------|-------------|-------------|
| RP11-28001.2 | NKAIN4   | 0.279467711 | 2.55E-09    |
| RP11-28001.2 | TRIM29   | 0.445384813 | 8.86E-23    |
| RP11-28001.2 | ADCY8    | 0.565409241 | 1.88E-38    |
| RP11-28001.2 | SFTA2    | 0.277286673 | 3.43E-09    |
| RP11-28001.2 | NRIP1    | 0.598829271 | 4.58E-44    |
| RP11-28001.2 | VWA1     | 0.277473047 | 3.35E-09    |
| RP11-28001.2 | APLNR    | 0.255903641 | 5.41E-08    |
| RP11-28001.2 | REN      | 0.686849576 | 1.52E-62    |
| RP11-28001.2 | EDIL3    | 0.237075391 | 5.04E-07    |
| RP11-28001.2 | AGRN     | 0.436272731 | 7.99E-22    |
| RP11-28001.2 | TREM1    | 0.267254773 | 1.29E-08    |
| RP11-28001.2 | SRL      | 0.282294821 | 1.74E-09    |
| RP11-28001.2 | RASGRF1  | 0.717162933 | 1.56E-70    |
| RP11-28001.2 | RMI2     | 0.496123149 | 1.18E-28    |
| RP11-28001.2 | SAMD1    | 0.471504941 | 1.11E-25    |
| RP11-28001.2 | MGAT4B   | 0.577256177 | 2.28E-40    |
| RP11-28001.2 | NXN      | 0.464485675 | 7.07E-25    |
| RP11-28001.2 | SH3BGRL3 | 0.376731236 | 2.98E-16    |
| RP11-28001.2 | CA11     | 0.577302275 | 2.24E-40    |
| RP11-28001.2 | PLD3     | 0.439515284 | 3.68E-22    |
| RP11-28001.2 | LURAP1L  | 0.276156651 | 3.99E-09    |
| RP11-28001.2 | CARNS1   | 0.57141459  | 2.05E-39    |
| RP11-28001.2 | PDLIM7   | 0.479449982 | 1.29E-26    |
| RP11-28001.2 | BCL2L1   | 0.360506417 | 6.41E-15    |
| RP11-28001.2 | GGT6     | 0.469401062 | 1.94E-25    |
| RP11-28001.2 | DPYSL3   | 0.250242755 | 1.08E-07    |
| RP11-28001.2 | FYN      | 0.6244107   | 7.88E-49    |
| RP11-28001.2 | TK1      | 0.137669124 | 0.003851963 |
| RP11-28001.2 | AK1      | 0.275560507 | 4.33E-09    |
| RP11-28001.2 | HIGD1B   | 0.36412796  | 3.28E-15    |
| RP11-28001.2 | TMEM59L  | 0.352852711 | 2.57E-14    |
| RP11-28001.2 | MEGF9    | 0.475452569 | 3.84E-26    |
| RP11-28001.2 | ZFP36L1  | 0.370225565 | 1.04E-15    |
| RP11-28001.2 | ADRA1B   | 0.44117209  | 2.47E-22    |
| RP11-28001.2 | EPHA4    | 0.380038183 | 1.56E-16    |
| RP11-28001.2 | TCERG1L  | 0.538534192 | 2.21E-34    |
| RP11-28001.2 | NGFR     | 0.637257227 | 2.15E-51    |
| RP11-28001.2 | EBI3     | 0.367273354 | 1.82E-15    |
| RP11-28001.2 | S100A10  | 0.227234263 | 1.50E-06    |
| RP11-28001.2 | S100B    | 0.358987761 | 8.47E-15    |
| RP11-28001.2 | CD44     | 0.456011863 | 6.26E-24    |
| RP11-28001.2 | BHLHE41  | 0.700936838 | 3.93E-66    |
| RP11-28001.2 | FBXO2    | 0.502383867 | 1.89E-29    |
| RP11-28001.2 | SLC30A2  | 0.140526161 | 0.003171473 |
| RP11-28001.2 | FRMD5    | 0.298171853 | 1.83E-10    |
| RP11-28001.2 | SAMD11   | 0.519007107 | 1.21E-31    |
| RP11-28001.2 | SIPA1L2  | 0.595891812 | 1.52E-43    |
| RP11-28001.2 | S100A16  | 0.429113046 | 4.29E-21    |
| RP11-28001.2 | PPL      | 0.427822323 | 5.79E-21    |
| RP11-28001.2 | ARHGD1B  | 0.22171791  | 2.72E-06    |
| RP11-28001.2 | CDC42EP3 | 0.298416382 | 1.76E-10    |

|              |          |             |             |
|--------------|----------|-------------|-------------|
| RP11-28001.2 | RUNX2    | 0.699389672 | 9.97E-66    |
| RP11-28001.2 | LAMC2    | 0.323259119 | 3.89E-12    |
| RP11-28001.2 | BRINP1   | 0.633363356 | 1.33E-50    |
| RP11-28001.2 | GPRC5B   | 0.638020598 | 1.50E-51    |
| RP11-28001.2 | AQP5     | 0.37752496  | 2.56E-16    |
| RP11-28001.2 | PLAG1    | 0.650345871 | 3.91E-54    |
| RP11-28001.2 | PTPRU    | 0.442500968 | 1.79E-22    |
| RP11-28001.2 | ANGPTL4  | 0.25863033  | 3.86E-08    |
| RP11-28001.2 | PALM3    | 0.623257701 | 1.32E-48    |
| RP11-28001.2 | ACP5     | 0.299722282 | 1.46E-10    |
| RP11-28001.2 | DLG4     | 0.609387389 | 5.58E-46    |
| RP11-28001.2 | ETNK2    | 0.80530927  | 2.84E-101   |
| RP11-28001.2 | CD109    | 0.599890785 | 2.96E-44    |
| RP11-28001.2 | SNX22    | 0.614961328 | 5.09E-47    |
| RP11-28001.2 | TMEM98   | 0.707094298 | 9.11E-68    |
| RP11-28001.2 | CTHRC1   | 0.288944174 | 6.88E-10    |
| RP11-28001.2 | S100A2   | 0.305188708 | 6.46E-11    |
| RP11-28001.2 | C11orf80 | 0.595523601 | 1.76E-43    |
| RP11-28001.2 | SREBF1   | 0.402886965 | 1.46E-18    |
| RP11-28001.2 | PRSS22   | 0.53889829  | 1.96E-34    |
| RP11-28001.2 | CMTM3    | 0.311318793 | 2.55E-11    |
| RP11-28001.2 | RDH5     | 0.763521037 | 5.08E-85    |
| RP11-28001.2 | MYH10    | 0.395937767 | 6.28E-18    |
| RP11-28001.2 | EVPL     | 0.445536721 | 8.54E-23    |
| RP11-28001.2 | SCD      | 0.363533235 | 3.67E-15    |
| RP11-28001.2 | CD151    | 0.581236144 | 4.97E-41    |
| RP11-28001.2 | S100A4   | 0.414092572 | 1.29E-19    |
| RP11-28001.2 | BNIP1    | 0.65788866  | 8.92E-56    |
| RP11-28001.2 | MAP3K6   | 0.539640952 | 1.53E-34    |
| RP11-28001.2 | MANEAL   | 0.405532806 | 8.29E-19    |
| RP11-28001.2 | CD207    | 0.465804387 | 5.01E-25    |
| RP11-28001.2 | CD1A     | 0.445311228 | 9.02E-23    |
| RP11-28001.2 | C3       | 0.351550499 | 3.24E-14    |
| RP11-28001.2 | NT5E     | 0.365150185 | 2.71E-15    |
| RP11-28001.2 | CACNG4   | 0.445959856 | 7.69E-23    |
| RP11-28001.2 | FHOD1    | 0.59051602  | 1.31E-42    |
| RP11-28001.2 | LEMD1    | 0.550397926 | 3.92E-36    |
| RP11-28001.2 | ATP11A   | 0.411132986 | 2.47E-19    |
| RP11-28001.2 | PPAP2C   | 0.395546153 | 6.82E-18    |
| RP11-28001.2 | DRAM1    | 0.485055551 | 2.74E-27    |
| RP11-28001.2 | CDA      | 0.317624615 | 9.54E-12    |
| RP11-28001.2 | CCND2    | 0.458206944 | 3.58E-24    |
| RP11-28001.2 | LCN6     | 0.659983414 | 3.06E-56    |
| RP11-28001.2 | CDH4     | 0.509454903 | 2.28E-30    |
| RP11-28001.2 | MMP11    | 0.388571566 | 2.85E-17    |
| RP11-28001.2 | B3GAT1   | 0.524848695 | 1.91E-32    |
| RP11-28001.2 | SPP1     | 0.225933611 | 1.73E-06    |
| RP11-28001.2 | HLA-DQB1 | 0.153938905 | 0.001214349 |
| RP11-28001.2 | SDC3     | 0.580852757 | 5.76E-41    |
| RP11-28001.2 | CX3CL1   | 0.241250952 | 3.12E-07    |
| RP11-28001.2 | SDK1     | 0.557365988 | 3.40E-37    |

|              |          |             |             |
|--------------|----------|-------------|-------------|
| RP11-28001.2 | DOCK9    | 0.620454703 | 4.59E-48    |
| RP11-28001.2 | CSF2     | 0.523002339 | 3.44E-32    |
| RP11-28001.2 | GRHL3    | 0.46140113  | 1.58E-24    |
| RP11-28001.2 | TMEM92   | 0.557479987 | 3.26E-37    |
| RP11-28001.2 | BASP1    | 0.550679616 | 3.56E-36    |
| RP11-28001.2 | HRH1     | 0.478557539 | 1.65E-26    |
| RP11-28001.2 | ESM1     | 0.114845305 | 0.016067174 |
| RP11-28001.2 | B4GALNT3 | 0.529176873 | 4.77E-33    |
| RP11-28001.2 | LMO3     | 0.336910717 | 4.11E-13    |
| RP11-28001.2 | C9orf16  | 0.371314311 | 8.47E-16    |
| RP11-28001.2 | SEMA3F   | 0.460617051 | 1.93E-24    |
| RP11-28001.2 | PLA2G12B | 0.595431229 | 1.83E-43    |
| RP11-28001.2 | KLK6     | 0.67897953  | 1.25E-60    |
| RP11-28001.2 | ST3GAL5  | 0.555785065 | 5.95E-37    |
| RP11-28001.2 | FAM132B  | 0.345923371 | 8.74E-14    |
| RP11-28001.2 | CDKN1A   | 0.046437674 | 0.331684233 |
| RP11-28001.2 | E2F1     | 0.295129576 | 2.84E-10    |
| RP11-28001.2 | B3GNT8   | 0.438628798 | 4.55E-22    |
| RP11-28001.2 | MTMR11   | 0.568699107 | 5.62E-39    |
| RP11-28001.2 | MYO1G    | 0.291996238 | 4.46E-10    |
| RP11-28001.2 | TMSB10   | 0.447189982 | 5.69E-23    |
| RP11-28001.2 | UNC5CL   | 0.478966315 | 1.48E-26    |
| RP11-28001.2 | ABR      | 0.312718306 | 2.05E-11    |
| RP11-28001.2 | PLP2     | 0.407385491 | 5.57E-19    |
| RP11-28001.2 | SRCIN1   | 0.523193306 | 3.24E-32    |
| RP11-28001.2 | PDE9A    | 0.56151843  | 7.70E-38    |
| RP11-28001.2 | TREM2    | 0.246863897 | 1.62E-07    |
| RP11-28001.2 | KDEL3    | 0.2364957   | 5.38E-07    |
| RP11-28001.2 | PC       | 0.72565334  | 5.79E-73    |
| RP11-28001.2 | C2CD4A   | 0.46367337  | 8.74E-25    |
| RP11-28001.2 | PELI1    | 0.402887674 | 1.46E-18    |
| RP11-28001.2 | SSX1     | 0.341849082 | 1.77E-13    |
| RP11-28001.2 | MROH6    | 0.545452044 | 2.15E-35    |
| RP11-28001.2 | ESPN     | 0.705610959 | 2.28E-67    |
| RP11-28001.2 | BMP1     | 0.603832456 | 5.79E-45    |
| RP11-28001.2 | TM4SF4   | 0.515043108 | 4.13E-31    |
| RP11-28001.2 | CORO2A   | 0.616160992 | 3.02E-47    |
| RP11-28001.2 | CD164L2  | 0.531011918 | 2.63E-33    |
| RP11-28001.2 | CTSS     | 0.240379785 | 3.45E-07    |
| RP11-28001.2 | CLU      | 0.576636772 | 2.88E-40    |
| RP11-28001.2 | TMSB4X   | 0.33837349  | 3.20E-13    |
| RP11-28001.2 | WNT10A   | 0.630308902 | 5.42E-50    |
| RP11-28001.2 | NAPSA    | 0.3348162   | 5.84E-13    |
| RP11-28001.2 | PLEKHA4  | 0.77513471  | 3.50E-89    |
| RP11-28001.2 | SFTPA1   | 0.182760944 | 0.000117718 |
| RP11-28001.2 | C1orf116 | 0.512643558 | 8.63E-31    |
| RP11-28001.2 | TM4SF1   | 0.381531309 | 1.16E-16    |
| RP11-28001.2 | SEL1L3   | 0.511969828 | 1.06E-30    |
| RP11-28001.2 | VASN     | 0.609480009 | 5.37E-46    |
| RP11-28001.2 | NPTXR    | 0.547646557 | 1.01E-35    |
| RP11-28001.2 | PDE4C    | 0.374611897 | 4.50E-16    |

|              |          |             |          |
|--------------|----------|-------------|----------|
| RP11-28001.2 | CDC42EP1 | 0.579940315 | 8.18E-41 |
| RP11-28001.2 | ENDOD1   | 0.641631928 | 2.70E-52 |
| RP11-28001.2 | RYR1     | 0.595746996 | 1.61E-43 |
| RP11-28001.2 | IL1RAP   | 0.551167679 | 3.00E-36 |
| RP11-28001.2 | SLC35F2  | 0.679228526 | 1.09E-60 |
| RP11-28001.2 | ISYNA1   | 0.609682837 | 4.92E-46 |
| RP11-28001.2 | HLA-G    | 0.317604758 | 9.57E-12 |
| RP11-28001.2 | CDKN2B   | 0.323879943 | 3.52E-12 |
| RP11-28001.2 | ALDH1A3  | 0.239769457 | 3.70E-07 |
| RP11-28001.2 | CLIP3    | 0.528317053 | 6.30E-33 |
| RP11-28001.2 | ULBP2    | 0.395559344 | 6.80E-18 |
| RP11-28001.2 | ETHE1    | 0.534750529 | 7.75E-34 |
| RP11-28001.2 | XPR1     | 0.371136021 | 8.76E-16 |
| RP11-28001.2 | SPTBN2   | 0.533739226 | 1.08E-33 |
| RP11-28001.2 | IVL      | 0.400297367 | 2.52E-18 |
| RP11-28001.2 | MARCO    | 0.314057538 | 1.67E-11 |
| RP11-28001.2 | PLXND1   | 0.487778835 | 1.28E-27 |
| RP11-28001.2 | EMILIN2  | 0.370417471 | 1.00E-15 |
| RP11-28001.2 | PLAUR    | 0.337988826 | 3.42E-13 |
| RP11-28001.2 | CDC42EP5 | 0.596002587 | 1.45E-43 |
| RP11-28001.2 | TRPC5    | 0.707542137 | 6.90E-68 |
| RP11-28001.2 | TMEM100  | 0.358313606 | 9.58E-15 |
| RP11-28001.2 | QSOX1    | 0.622287247 | 2.04E-48 |
| RP11-28001.2 | ARHGAP23 | 0.588758508 | 2.64E-42 |
| RP11-28001.2 | MDF1     | 0.357546831 | 1.10E-14 |
| RP11-28001.2 | FSTL3    | 0.58036058  | 6.96E-41 |
| RP11-28001.2 | INF2     | 0.704196695 | 5.42E-67 |
| RP11-28001.2 | TGFBR1   | 0.74412189  | 1.41E-78 |
| RP11-28001.2 | TGFBI    | 0.299938726 | 1.41E-10 |
| RP11-28001.2 | ERBB3    | 0.653363044 | 8.73E-55 |
| RP11-28001.2 | CCL18    | 0.276977892 | 3.58E-09 |
| RP11-28001.2 | CCL17    | 0.344370543 | 1.14E-13 |
| RP11-28001.2 | C16orf45 | 0.667644543 | 5.70E-58 |
| RP11-28001.2 | PRDM1    | 0.49741444  | 8.10E-29 |
| RP11-28001.2 | TRIM47   | 0.403709482 | 1.22E-18 |
| RP11-28001.2 | CNFN     | 0.43017995  | 3.35E-21 |
| RP11-28001.2 | ARMCX3   | 0.793702121 | 2.20E-96 |
| RP11-28001.2 | RAMP1    | 0.641929787 | 2.34E-52 |
| RP11-28001.2 | GABRD    | 0.368803358 | 1.36E-15 |
| RP11-28001.2 | COL13A1  | 0.493635032 | 2.41E-28 |
| RP11-28001.2 | S100A5   | 0.543449011 | 4.25E-35 |
| RP11-28001.2 | MISP     | 0.321101058 | 5.50E-12 |
| RP11-28001.2 | HES6     | 0.343123494 | 1.42E-13 |
| RP11-28001.2 | PSD3     | 0.53972804  | 1.49E-34 |
| RP11-28001.2 | DOK7     | 0.623254297 | 1.32E-48 |
| RP11-28001.2 | ZMAT3    | 0.340908272 | 2.08E-13 |
| RP11-28001.2 | MFAP2    | 0.55797972  | 2.73E-37 |
| RP11-28001.2 | TMEM79   | 0.64793463  | 1.28E-53 |
| RP11-28001.2 | SLC1A5   | 0.515390671 | 3.71E-31 |
| RP11-28001.2 | BBC3     | 0.417084355 | 6.63E-20 |
| RP11-28001.2 | HLA-DQB2 | 0.255686629 | 5.56E-08 |

|              |           |             |            |
|--------------|-----------|-------------|------------|
| RP11-28001.2 | C1QL1     | 0.744619456 | 9.79E-79   |
| RP11-28001.2 | TMEM215   | 0.45915212  | 2.81E-24   |
| RP11-28001.2 | PNP       | 0.471082548 | 1.24E-25   |
| RP11-28001.2 | ARNTL     | 0.669190149 | 2.51E-58   |
| RP11-28001.2 | CLDN2     | 0.574896656 | 5.57E-40   |
| RP11-28001.2 | MVP       | 0.441032522 | 2.55E-22   |
| RP11-28001.2 | LGALS1    | 0.320309603 | 6.24E-12   |
| RP11-28001.2 | BIRC7     | 0.51867444  | 1.34E-31   |
| RP11-28001.2 | COL8A1    | 0.583409949 | 2.14E-41   |
| RP11-28001.2 | PERP      | 0.46845543  | 2.49E-25   |
| RP11-28001.2 | GJA4      | 0.462791991 | 1.10E-24   |
| RP11-28001.2 | IGFL2     | 0.494574975 | 1.84E-28   |
| RP11-28001.2 | DAPK2     | 0.666898619 | 8.44E-58   |
| RP11-28001.2 | MAMLD1    | 0.624145747 | 8.87E-49   |
| RP11-28001.2 | ETV5      | 0.481008495 | 8.42E-27   |
| RP11-28001.2 | RUNX1     | 0.426307638 | 8.21E-21   |
| RP11-28001.2 | LONRF2    | 0.676664289 | 4.47E-60   |
| RP11-28001.2 | SPOCK1    | 0.397437559 | 4.60E-18   |
| RP11-28001.2 | XKRX      | 0.575545189 | 4.36E-40   |
| RP11-28001.2 | TGFB1     | 0.397370045 | 4.66E-18   |
| RP11-28001.2 | ERP27     | 0.368964769 | 1.32E-15   |
| RP11-28001.2 | TNFRSF10C | 0.275751279 | 4.22E-09   |
| RP11-28001.2 | PALM      | 0.732622537 | 5.00E-75   |
| RP11-28001.2 | TSC22D1   | 0.70614512  | 1.64E-67   |
| RP11-28001.2 | TGM2      | 0.241034082 | 3.20E-07   |
| RP11-28001.2 | UBE2QL1   | 0.631429114 | 3.24E-50   |
| RP11-28001.2 | ECE1      | 0.63120416  | 3.59E-50   |
| RP11-28001.2 | COL8A2    | 0.554984249 | 7.89E-37   |
| RP11-28001.2 | HIST3H2A  | 0.392160487 | 1.37E-17   |
| RP11-28001.2 | TNFRSF21  | 0.390743811 | 1.83E-17   |
| RP11-28001.2 | SOX4      | 0.517214279 | 2.11E-31   |
| RP11-28001.2 | ELF3      | 0.479212687 | 1.38E-26   |
| RP11-28001.2 | TPD52L1   | 0.682299785 | 1.98E-61   |
| RP11-28001.2 | INHBB     | 0.68911367  | 4.16E-63   |
| RP11-28001.2 | HPN       | 0.51850103  | 1.41E-31   |
| RP11-28001.2 | MMP7      | 0.283973325 | 1.38E-09   |
| RP11-28001.2 | RAB27A    | 0.651784673 | 1.92E-54   |
| RP11-28001.2 | IGF2BP2   | 0.677941679 | 2.22E-60   |
| RP11-28001.2 | ITGB4     | 0.450033686 | 2.81E-23   |
| RP11-28001.2 | PPP1R1B   | 0.698911679 | 1.33E-65   |
| RP11-28001.2 | NPDC1     | 0.465990999 | 4.77E-25   |
| RP11-28001.2 | CCL13     | 0.427009957 | 6.98E-21   |
| RP11-28001.2 | SPINT1    | 0.535179304 | 6.73E-34   |
| RP11-28001.2 | HEY2      | 0.628843129 | 1.06E-49   |
| RP11-28001.2 | CST2      | 0.347008564 | 7.23E-14   |
| RP11-28001.2 | ADM       | 0.356715946 | 1.28E-14   |
| RP11-28001.2 | VSTM2L    | 0.138926941 | 0.00353756 |
| RP11-28001.2 | FAM84A    | 0.402010975 | 1.76E-18   |
| RP11-28001.2 | P4HA2     | 0.4349413   | 1.10E-21   |
| RP11-28001.2 | LPL       | 0.461976707 | 1.36E-24   |
| RP11-28001.2 | TMEM173   | 0.397025946 | 5.01E-18   |

|              |            |              |          |
|--------------|------------|--------------|----------|
| RP11-28001.2 | DHRS3      | 0.747080483  | 1.60E-79 |
| RP11-28001.2 | SCN1B      | 0.501298099  | 2.60E-29 |
| RP11-28001.2 | GLT1D1     | 0.481112178  | 8.18E-27 |
| RP11-28001.2 | PHYHIP     | 0.575913258  | 3.79E-40 |
| RP11-28001.2 | BHLHE40    | 0.441893903  | 2.07E-22 |
| RP11-28001.2 | BID        | 0.6744440273 | 1.50E-59 |
| RP11-28001.2 | POSTN      | 0.192754787  | 4.80E-05 |
| RP11-28001.2 | ITGA3      | 0.496463702  | 1.07E-28 |
| RP11-28001.2 | RSP04      | 0.639445925  | 7.65E-52 |
| RP11-28001.2 | ADAMTS9    | 0.5500795    | 4.38E-36 |
| RP11-28001.2 | ABTB2      | 0.58861426   | 2.79E-42 |
| RP11-28001.2 | KCNQ3      | 0.558107374  | 2.61E-37 |
| RP11-28001.2 | ANXA1      | 0.626613723  | 2.92E-49 |
| RP11-28001.2 | S100A11    | 0.415021042  | 1.05E-19 |
| RP11-28001.2 | CEACAM6    | 0.317274066  | 1.01E-11 |
| RP11-28001.2 | IER5L      | 0.541511934  | 8.17E-35 |
| RP11-28001.2 | KRT80      | 0.421180771  | 2.64E-20 |
| RP11-28001.2 | CDH6       | 0.338938571  | 2.91E-13 |
| RP11-28001.2 | UNC5B      | 0.407916248  | 4.96E-19 |
| RP11-28001.2 | PLEKHN1    | 0.578310599  | 1.53E-40 |
| RP11-28001.2 | SYTL1      | 0.38839512   | 2.95E-17 |
| RP11-28001.2 | TMEM163    | 0.479830958  | 1.16E-26 |
| RP11-28001.2 | C4orf48    | 0.264314477  | 1.88E-08 |
| RP11-28001.2 | B3GNT7     | 0.528469954  | 6.00E-33 |
| RP11-28001.2 | BAIAP3     | 0.795979326  | 2.56E-97 |
| RP11-28001.2 | PHLDA2     | 0.366829544  | 1.98E-15 |
| RP11-28001.2 | GAP43      | 0.643479809  | 1.11E-52 |
| RP11-28001.2 | S100A1     | 0.370314355  | 1.02E-15 |
| RP11-28001.2 | PTPRE      | 0.64826653   | 1.09E-53 |
| RP11-28001.2 | CCND1      | 0.381045656  | 1.28E-16 |
| RP11-28001.2 | ST6GALNAC5 | 0.421270002  | 2.59E-20 |
| RP11-28001.2 | KRT17      | 0.315723422  | 1.29E-11 |
| RP11-28001.2 | HPCAL4     | 0.75676488   | 1.04E-82 |
| RP11-28001.2 | GABBR2     | 0.463393383  | 9.40E-25 |
| RP11-28001.2 | DIRAS3     | 0.660764562  | 2.05E-56 |
| RP11-28001.2 | SERINC2    | 0.299743699  | 1.45E-10 |
| RP11-28001.2 | PTCHD4     | 0.311661615  | 2.41E-11 |
| RP11-28001.2 | EPS8       | 0.660803426  | 2.01E-56 |
| RP11-28001.2 | LY6E       | 0.638693476  | 1.09E-51 |
| RP11-28001.2 | UPP1       | 0.493786089  | 2.31E-28 |
| RP11-28001.2 | AHNAK2     | 0.411741611  | 2.16E-19 |
| RP11-28001.2 | PLXNC1     | 0.674601542  | 1.38E-59 |
| RP11-28001.2 | TNC        | 0.257454495  | 4.47E-08 |
| RP11-28001.2 | DUSP4      | 0.460969801  | 1.76E-24 |
| RP11-28001.2 | NRCAM      | 0.603125394  | 7.77E-45 |
| RP11-28001.2 | NRP2       | 0.655133037  | 3.59E-55 |
| RP11-28001.2 | CTSC       | 0.474035468  | 5.63E-26 |
| RP11-28001.2 | AMIGO2     | 0.594899657  | 2.26E-43 |
| RP11-28001.2 | NAB2       | 0.681128489  | 3.81E-61 |
| RP11-28001.2 | TBC1D2     | 0.500259421  | 3.53E-29 |
| RP11-28001.2 | PHLDA3     | 0.35145717   | 3.29E-14 |



|              |         |             |           |
|--------------|---------|-------------|-----------|
| RP11-28001.2 | PTP4A3  | 0.419180717 | 4.15E-20  |
| RP11-28001.2 | CRABP2  | 0.360692934 | 6.20E-15  |
| RP11-28001.2 | GOS2    | 0.484883076 | 2.88E-27  |
| RP11-28001.2 | S100A6  | 0.476188565 | 3.14E-26  |
| RP11-28001.2 | FOXQ1   | 0.509095345 | 2.54E-30  |
| RP11-28001.2 | LRG1    | 0.546190735 | 1.67E-35  |
| RP11-28001.2 | LAMP5   | 0.465243798 | 5.80E-25  |
| RP11-28001.2 | ALDH3B1 | 0.470309816 | 1.53E-25  |
| RP11-28001.2 | CDH2    | 0.297316146 | 2.07E-10  |
| RP11-28001.2 | SCG5    | 0.516385804 | 2.73E-31  |
| RP11-28001.2 | ZCCHC16 | 0.719461174 | 3.49E-71  |
| RP11-28001.2 | GRB7    | 0.708894219 | 2.97E-68  |
| RP11-28001.2 | TIAM1   | 0.507241242 | 4.44E-30  |
| RP11-28001.2 | FXD5    | 0.359708297 | 7.42E-15  |
| RP11-28001.2 | CLDN9   | 0.507851144 | 3.69E-30  |
| RP11-28001.2 | FAM43A  | 0.716542677 | 2.32E-70  |
| RP11-28001.2 | CHST2   | 0.608792096 | 7.19E-46  |
| RP11-28001.2 | HMGA2   | 0.547756765 | 9.76E-36  |
| RP11-28001.2 | GALNT7  | 0.607870009 | 1.06E-45  |
| RP11-28001.2 | CBLN1   | 0.396052372 | 6.14E-18  |
| RP11-28001.2 | STRA6   | 0.593709638 | 3.66E-43  |
| RP11-28001.2 | MUC21   | 0.461604445 | 1.49E-24  |
| RP11-28001.2 | PRR36   | 0.632922524 | 1.63E-50  |
| RP11-28001.2 | NFE2L3  | 0.337873937 | 3.49E-13  |
| RP11-28001.2 | NR1D1   | 0.378764622 | 2.01E-16  |
| RP11-28001.2 | MUC1    | 0.338308103 | 3.24E-13  |
| RP11-28001.2 | NAT8L   | 0.563982577 | 3.16E-38  |
| RP11-28001.2 | APOC1   | 0.486773489 | 1.69E-27  |
| RP11-28001.2 | EVA1A   | 0.54089962  | 1.00E-34  |
| RP11-28001.2 | ENTPD1  | 0.536980643 | 3.71E-34  |
| RP11-28001.2 | COL1A1  | 0.316491332 | 1.14E-11  |
| RP11-28001.2 | FNDC4   | 0.328403574 | 1.69E-12  |
| RP11-28001.2 | FRMD3   | 0.511006325 | 1.42E-30  |
| RP11-28001.2 | SHROOM4 | 0.68807868  | 7.53E-63  |
| RP11-28001.2 | NELL2   | 0.654848227 | 4.15E-55  |
| RP11-28001.2 | EPHB3   | 0.514627158 | 4.69E-31  |
| RP11-28001.2 | TMC6    | 0.565471589 | 1.84E-38  |
| RP11-28001.2 | NOD1    | 0.848740694 | 5.42E-123 |
| RP11-28001.2 | GGCT    | 0.790160858 | 5.92E-95  |
| RP11-28001.2 | ICAM1   | 0.483028548 | 4.82E-27  |
| RP11-28001.2 | PRSS23  | 0.448540986 | 4.07E-23  |
| RP11-28001.2 | CFI     | 0.515279044 | 3.84E-31  |
| RP11-28001.2 | CD55    | 0.4811509   | 8.10E-27  |
| RP11-28001.2 | RASD2   | 0.679534233 | 9.23E-61  |
| RP11-28001.2 | KLK11   | 0.660145228 | 2.82E-56  |
| RP11-28001.2 | ICAM5   | 0.718677335 | 5.82E-71  |
| RP11-28001.2 | ADORA1  | 0.42805749  | 5.48E-21  |
| RP11-28001.2 | ITGA2   | 0.450560755 | 2.47E-23  |
| RP11-28001.2 | ABCC3   | 0.590090081 | 1.56E-42  |
| RP11-28001.2 | MFGE8   | 0.596690642 | 1.10E-43  |
| RP11-28001.2 | STK32A  | 0.354386261 | 1.95E-14  |

|              |           |             |          |
|--------------|-----------|-------------|----------|
| RP11-28001.2 | CYSLTR2   | 0.614525319 | 6.15E-47 |
| RP11-28001.2 | LAD1      | 0.654632208 | 4.62E-55 |
| RP11-28001.2 | MGAT3     | 0.50321305  | 1.48E-29 |
| RP11-28001.2 | IGFBP6    | 0.601095697 | 1.80E-44 |
| RP11-28001.2 | CYP2S1    | 0.439499398 | 3.69E-22 |
| RP11-28001.2 | KCNJ2     | 0.5330133   | 1.37E-33 |
| RP11-28001.2 | FAM20A    | 0.478698809 | 1.59E-26 |
| RP11-28001.2 | TGFA      | 0.621121766 | 3.42E-48 |
| RP11-28001.2 | MXRA8     | 0.727582475 | 1.58E-73 |
| RP11-28001.2 | C8orf4    | 0.295394812 | 2.74E-10 |
| RP11-28001.2 | CLDN10    | 0.60363126  | 6.30E-45 |
| RP11-28001.2 | PDE5A     | 0.730899776 | 1.64E-74 |
| RP11-28001.2 | APOE      | 0.546831558 | 1.34E-35 |
| RP11-28001.2 | SPOCK2    | 0.452272453 | 1.61E-23 |
| RP11-28001.2 | TENM1     | 0.592560611 | 5.80E-43 |
| RP11-28001.2 | SLIT1     | 0.392091128 | 1.39E-17 |
| RP11-28001.2 | CXCL14    | 0.399987944 | 2.69E-18 |
| RP11-28001.2 | ECM1      | 0.231421455 | 9.50E-07 |
| RP11-28001.2 | DUSP5     | 0.516112909 | 2.97E-31 |
| RP11-28001.2 | SEZ6L2    | 0.419856716 | 3.56E-20 |
| RP11-28001.2 | THRSP     | 0.24181887  | 2.92E-07 |
| RP11-28001.2 | C19orf33  | 0.430699501 | 2.97E-21 |
| RP11-28001.2 | MPZL2     | 0.539009774 | 1.89E-34 |
| RP11-28001.2 | CTSH      | 0.71719584  | 1.52E-70 |
| RP11-28001.2 | CYP1B1    | 0.650772094 | 3.17E-54 |
| RP11-28001.2 | ALOX5     | 0.292432106 | 4.19E-10 |
| RP11-28001.2 | SYTL5     | 0.584409713 | 1.45E-41 |
| RP11-28001.2 | TNFRSF12A | 0.58668867  | 5.96E-42 |
| RP11-28001.2 | DUSP6     | 0.542817124 | 5.26E-35 |
| RP11-28001.2 | ALOX15B   | 0.446331722 | 7.02E-23 |
| RP11-28001.2 | SDC4      | 0.771579548 | 6.98E-88 |
| RP11-28001.2 | MDK       | 0.642959246 | 1.43E-52 |
| RP11-28001.2 | KRT19     | 0.433541362 | 1.52E-21 |
| RP11-28001.2 | MET       | 0.59506504  | 2.12E-43 |
| RP11-28001.2 | TESC      | 0.61897491  | 8.82E-48 |
| RP11-28001.2 | CXCL17    | 0.540654685 | 1.09E-34 |
| RP11-28001.2 | NPC2      | 0.677522265 | 2.80E-60 |
| RP11-28001.2 | COMP      | 0.496397747 | 1.09E-28 |
| RP11-28001.2 | TUSC3     | 0.608552674 | 7.96E-46 |
| RP11-28001.2 | TMPRSS4   | 0.508652953 | 2.90E-30 |
| RP11-28001.2 | LGALS3    | 0.557774481 | 2.94E-37 |
| RP11-28001.2 | CRLF1     | 0.392216087 | 1.35E-17 |
| RP11-28001.2 | CTXN1     | 0.620709586 | 4.10E-48 |
| RP11-28001.2 | PCSK1N    | 0.27679563  | 3.67E-09 |
| RP11-28001.2 | NMU       | 0.47309274  | 7.25E-26 |
| RP11-28001.2 | GALE      | 0.628553354 | 1.21E-49 |
| RP11-28001.2 | PCSK2     | 0.187101276 | 8.02E-05 |
| RP11-28001.2 | GJB3      | 0.729913436 | 3.23E-74 |
| RP11-28001.2 | SLPI      | 0.252887462 | 7.83E-08 |
| RP11-28001.2 | AGR2      | 0.293677441 | 3.51E-10 |
| RP11-28001.2 | MRC2      | 0.496227116 | 1.14E-28 |

|              |          |             |          |
|--------------|----------|-------------|----------|
| RP11-28001.2 | GOLT1A   | 0.654419451 | 5.14E-55 |
| RP11-28001.2 | SLC27A6  | 0.60074318  | 2.08E-44 |
| RP11-28001.2 | KCNN4    | 0.477161146 | 2.41E-26 |
| RP11-28001.2 | ETV4     | 0.631549486 | 3.07E-50 |
| RP11-28001.2 | SYT12    | 0.793717865 | 2.17E-96 |
| RP11-28001.2 | PVRL4    | 0.638327818 | 1.30E-51 |
| RP11-28001.2 | PLCD3    | 0.690247379 | 2.16E-63 |
| RP11-28001.2 | PLAU     | 0.327179656 | 2.06E-12 |
| RP11-28001.2 | LRRK2    | 0.440664028 | 2.79E-22 |
| RP11-28001.2 | SFN      | 0.426675423 | 7.54E-21 |
| RP11-28001.2 | LPAR5    | 0.679565863 | 9.07E-61 |
| RP11-28001.2 | NGEF     | 0.59056155  | 1.29E-42 |
| RP11-28001.2 | DTX4     | 0.701282355 | 3.19E-66 |
| RP11-28001.2 | CST6     | 0.662032024 | 1.07E-56 |
| RP11-28001.2 | QPCT     | 0.671779255 | 6.31E-59 |
| RP11-28001.2 | TIMP1    | 0.678977378 | 1.26E-60 |
| RP11-28001.2 | CAMK2N1  | 0.742568341 | 4.36E-78 |
| RP11-28001.2 | KLHDC8A  | 0.386745122 | 4.12E-17 |
| RP11-28001.2 | PDLIM4   | 0.673039625 | 3.20E-59 |
| RP11-28001.2 | SCEL     | 0.434420472 | 1.24E-21 |
| RP11-28001.2 | LCN2     | 0.368650457 | 1.40E-15 |
| RP11-28001.2 | PROS1    | 0.603130501 | 7.75E-45 |
| RP11-28001.2 | GABRB2   | 0.71792758  | 9.48E-71 |
| RP11-28001.2 | TMPRSS6  | 0.642563377 | 1.73E-52 |
| RP11-28001.2 | KLK7     | 0.628310925 | 1.35E-49 |
| RP11-28001.2 | PDZK1IP1 | 0.310243521 | 3.00E-11 |
| RP11-28001.2 | CDH3     | 0.675580648 | 8.08E-60 |
| RP11-28001.2 | LRP4     | 0.597825344 | 6.90E-44 |
| RP11-28001.2 | IGSF1    | 0.383399028 | 8.04E-17 |
| RP11-28001.2 | B3GNT3   | 0.409196901 | 3.76E-19 |
| RP11-28001.2 | CLDN1    | 0.409377602 | 3.62E-19 |
| RP11-28001.2 | GDF15    | 0.432930892 | 1.76E-21 |
| RP11-28001.2 | ARHGAP36 | 0.358610013 | 9.07E-15 |
| RP11-28001.2 | LAMB3    | 0.490549919 | 5.83E-28 |
| RP11-28001.2 | KLK10    | 0.732598708 | 5.09E-75 |
| RP11-28001.2 | DPP4     | 0.45678729  | 5.14E-24 |
| RP11-28001.2 | METTL7B  | 0.666467716 | 1.06E-57 |
| RP11-28001.2 | LIPH     | 0.524734657 | 1.98E-32 |
| RP11-28001.2 | CLDN16   | 0.408980314 | 3.94E-19 |
| RP11-28001.2 | CHI3L1   | 0.508544021 | 3.00E-30 |
| RP11-28001.2 | SLC22A31 | 0.628402236 | 1.30E-49 |
| RP11-28001.2 | TACSTD2  | 0.672574256 | 4.12E-59 |
| RP11-28001.2 | SFTPB    | 0.4756032   | 3.69E-26 |
| RP11-28001.2 | RXRG     | 0.79962257  | 7.75E-99 |
| RP11-28001.2 | DCSTAMP  | 0.709933565 | 1.55E-68 |
| RP11-28001.2 | CITED1   | 0.638617876 | 1.13E-51 |
| RP11-28001.2 | SERPINA1 | 0.638797159 | 1.04E-51 |
| RP11-28001.2 | PRR15    | 0.676308559 | 5.43E-60 |
| RP11-28001.2 | SLC34A2  | 0.544886111 | 2.61E-35 |
| RP11-28001.2 | FN1      | 0.472081369 | 9.51E-26 |
| RP11-28001.2 | ZCCHC12  | 0.600016028 | 2.81E-44 |

|                |           |              |             |
|----------------|-----------|--------------|-------------|
| CTD-2619J13.13 | TFF3      | -0.534948036 | 7.27E-34    |
| CTD-2619J13.13 | CCL21     | -0.34827827  | 5.78E-14    |
| CTD-2619J13.13 | TPO       | -0.582437384 | 3.12E-41    |
| CTD-2619J13.13 | MT1G      | -0.505882341 | 6.67E-30    |
| CTD-2619J13.13 | DI01      | -0.543712295 | 3.88E-35    |
| CTD-2619J13.13 | DPT       | -0.297500977 | 2.02E-10    |
| CTD-2619J13.13 | CDH16     | -0.529702047 | 4.03E-33    |
| CTD-2619J13.13 | CRABP1    | -0.474429013 | 5.06E-26    |
| CTD-2619J13.13 | SLC26A7   | -0.672746516 | 3.75E-59    |
| CTD-2619J13.13 | MT1H      | -0.461926081 | 1.38E-24    |
| CTD-2619J13.13 | SLC26A4   | -0.601236905 | 1.70E-44    |
| CTD-2619J13.13 | SLC5A8    | -0.671607437 | 6.92E-59    |
| CTD-2619J13.13 | PKHD1L1   | -0.587841162 | 3.79E-42    |
| CTD-2619J13.13 | TFCP2L1   | -0.693941667 | 2.52E-64    |
| CTD-2619J13.13 | WSCD2     | -0.600286405 | 2.52E-44    |
| CTD-2619J13.13 | IPCEF1    | -0.618848966 | 9.32E-48    |
| CTD-2619J13.13 | SLC5A5    | -0.40977055  | 3.32E-19    |
| CTD-2619J13.13 | MT1F      | -0.461289308 | 1.62E-24    |
| CTD-2619J13.13 | FOSB      | -0.372718248 | 6.48E-16    |
| CTD-2619J13.13 | SEMA3D    | -0.616747103 | 2.34E-47    |
| CTD-2619J13.13 | BMP8A     | -0.537373451 | 3.26E-34    |
| CTD-2619J13.13 | MATN2     | -0.696378288 | 6.00E-65    |
| CTD-2619J13.13 | PLA2R1    | -0.651009264 | 2.82E-54    |
| CTD-2619J13.13 | COL23A1   | -0.548828078 | 6.75E-36    |
| CTD-2619J13.13 | HGD       | -0.644271006 | 7.60E-53    |
| CTD-2619J13.13 | TCEAL2    | -0.4083971   | 4.47E-19    |
| CTD-2619J13.13 | CHRD1     | -0.415088353 | 1.03E-19    |
| CTD-2619J13.13 | TNFRSF11B | -0.633788389 | 1.09E-50    |
| CTD-2619J13.13 | FAM167A   | -0.65126145  | 2.49E-54    |
| CTD-2619J13.13 | KIT       | -0.595496046 | 1.78E-43    |
| CTD-2619J13.13 | SLC4A4    | -0.685404205 | 3.45E-62    |
| CTD-2619J13.13 | SMOC2     | -0.412614344 | 1.78E-19    |
| CTD-2619J13.13 | FHL1      | -0.719136484 | 4.32E-71    |
| CTD-2619J13.13 | OTOS      | -0.471308968 | 1.17E-25    |
| CTD-2619J13.13 | IGFBPL1   | -0.6938873   | 2.60E-64    |
| CTD-2619J13.13 | HBB       | -0.320826843 | 5.75E-12    |
| CTD-2619J13.13 | BEX1      | -0.332272817 | 8.93E-13    |
| CTD-2619J13.13 | FABP4     | -0.543619469 | 4.01E-35    |
| CTD-2619J13.13 | LMOD1     | -0.554501989 | 9.35E-37    |
| CTD-2619J13.13 | SOD3      | -0.542469802 | 5.91E-35    |
| CTD-2619J13.13 | TMEM171   | -0.582337814 | 3.25E-41    |
| CTD-2619J13.13 | PI16      | -0.353592217 | 2.25E-14    |
| CTD-2619J13.13 | ZMAT4     | -0.605114649 | 3.39E-45    |
| CTD-2619J13.13 | MFAP4     | -0.236086378 | 5.63E-07    |
| CTD-2619J13.13 | CWH43     | -0.547031659 | 1.25E-35    |
| CTD-2619J13.13 | SPX       | -0.686672797 | 1.68E-62    |
| CTD-2619J13.13 | APOD      | -0.13632309  | 0.004216252 |
| CTD-2619J13.13 | DPP6      | -0.55457773  | 9.10E-37    |
| CTD-2619J13.13 | MMRN1     | -0.526716659 | 1.05E-32    |
| CTD-2619J13.13 | WDR72     | -0.622771472 | 1.64E-48    |
| CTD-2619J13.13 | MPPED2    | -0.673255286 | 2.85E-59    |

|                |            |              |             |
|----------------|------------|--------------|-------------|
| CTD-2619J13.13 | PAPSS2     | -0.508614408 | 2.93E-30    |
| CTD-2619J13.13 | DCN        | -0.158954059 | 0.000831066 |
| CTD-2619J13.13 | SORBS2     | -0.657800994 | 9.33E-56    |
| CTD-2619J13.13 | EGR2       | -0.410506218 | 2.83E-19    |
| CTD-2619J13.13 | EDN3       | -0.438994485 | 4.17E-22    |
| CTD-2619J13.13 | DIO2       | -0.618208004 | 1.24E-47    |
| CTD-2619J13.13 | ITPR1      | -0.674409415 | 1.53E-59    |
| CTD-2619J13.13 | CFD        | -0.160949424 | 0.00071245  |
| CTD-2619J13.13 | CPXM1      | -0.343658652 | 1.29E-13    |
| CTD-2619J13.13 | ELM01      | -0.607173357 | 1.43E-45    |
| CTD-2619J13.13 | GPC3       | -0.487203044 | 1.50E-27    |
| CTD-2619J13.13 | MYOC       | -0.250996655 | 9.85E-08    |
| CTD-2619J13.13 | DEPTOR     | -0.653427871 | 8.45E-55    |
| CTD-2619J13.13 | DGKI       | -0.618415086 | 1.13E-47    |
| CTD-2619J13.13 | CARTPT     | -0.484067456 | 3.61E-27    |
| CTD-2619J13.13 | IYD        | -0.509982428 | 1.94E-30    |
| CTD-2619J13.13 | LYVE1      | -0.396332574 | 5.79E-18    |
| CTD-2619J13.13 | CLCNKB     | -0.548669078 | 7.13E-36    |
| CTD-2619J13.13 | NCAM1      | -0.502019265 | 2.10E-29    |
| CTD-2619J13.13 | HBA2       | -0.201132598 | 2.18E-05    |
| CTD-2619J13.13 | GLT8D2     | -0.484175725 | 3.50E-27    |
| CTD-2619J13.13 | OGDHL      | -0.515872216 | 3.20E-31    |
| CTD-2619J13.13 | LIFR       | -0.661921221 | 1.13E-56    |
| CTD-2619J13.13 | CSGALNACT1 | -0.530985531 | 2.66E-33    |
| CTD-2619J13.13 | RAP1GAP    | -0.588261501 | 3.21E-42    |
| CTD-2619J13.13 | COL9A3     | -0.449670576 | 3.08E-23    |
| CTD-2619J13.13 | FBLN1      | -0.171566218 | 0.000304697 |
| CTD-2619J13.13 | EFEMP1     | -0.490356279 | 6.16E-28    |
| CTD-2619J13.13 | AOX1       | -0.564953209 | 2.22E-38    |
| CTD-2619J13.13 | GRIN2C     | -0.540037011 | 1.34E-34    |
| CTD-2619J13.13 | C11orf74   | -0.502898229 | 1.62E-29    |
| CTD-2619J13.13 | PPARGC1A   | -0.650808422 | 3.11E-54    |
| CTD-2619J13.13 | ANGPTL1    | -0.657248822 | 1.23E-55    |
| CTD-2619J13.13 | SCARA5     | -0.303861916 | 7.88E-11    |
| CTD-2619J13.13 | LTF        | -0.493505915 | 2.51E-28    |
| CTD-2619J13.13 | CA4        | -0.554844794 | 8.29E-37    |
| CTD-2619J13.13 | TG         | -0.631079442 | 3.81E-50    |
| CTD-2619J13.13 | FCGBP      | -0.517901338 | 1.70E-31    |
| CTD-2619J13.13 | PBX4       | -0.442759561 | 1.68E-22    |
| CTD-2619J13.13 | CYR61      | -0.396044786 | 6.15E-18    |
| CTD-2619J13.13 | FOS        | -0.41123668  | 2.41E-19    |
| CTD-2619J13.13 | KHDRBS2    | -0.480555758 | 9.54E-27    |
| CTD-2619J13.13 | MUM1L1     | -0.477882553 | 1.98E-26    |
| CTD-2619J13.13 | RGS16      | -0.507235468 | 4.44E-30    |
| CTD-2619J13.13 | MT1M       | -0.451209935 | 2.10E-23    |
| CTD-2619J13.13 | LRP2       | -0.678136612 | 2.00E-60    |
| CTD-2619J13.13 | MAFB       | -0.524539742 | 2.11E-32    |
| CTD-2619J13.13 | KCNK2      | -0.596773148 | 1.06E-43    |
| CTD-2619J13.13 | TBC1D4     | -0.640718695 | 4.18E-52    |
| CTD-2619J13.13 | MIOX       | -0.50577818  | 6.88E-30    |
| CTD-2619J13.13 | TPPP       | -0.642946105 | 1.44E-52    |

|                |          |              |             |
|----------------|----------|--------------|-------------|
| CTD-2619J13.13 | FMOD     | -0.582112009 | 3.54E-41    |
| CTD-2619J13.13 | CITED2   | -0.576633265 | 2.89E-40    |
| CTD-2619J13.13 | RGS8     | -0.579812996 | 8.59E-41    |
| CTD-2619J13.13 | ABI3BP   | -0.434330463 | 1.27E-21    |
| CTD-2619J13.13 | ADH1B    | -0.349950818 | 4.30E-14    |
| CTD-2619J13.13 | OGN      | -0.287455087 | 8.48E-10    |
| CTD-2619J13.13 | NR4A1    | -0.33477369  | 5.88E-13    |
| CTD-2619J13.13 | FOXJ1    | -0.481655381 | 7.05E-27    |
| CTD-2619J13.13 | ALDH1A1  | -0.548191512 | 8.40E-36    |
| CTD-2619J13.13 | OCA2     | -0.44628916  | 7.10E-23    |
| CTD-2619J13.13 | TMEM139  | -0.314966273 | 1.45E-11    |
| CTD-2619J13.13 | ARHGAP24 | -0.636281177 | 3.40E-51    |
| CTD-2619J13.13 | SLC25A15 | -0.683974629 | 7.74E-62    |
| CTD-2619J13.13 | DES      | -0.29693403  | 2.19E-10    |
| CTD-2619J13.13 | GDF10    | -0.480528008 | 9.61E-27    |
| CTD-2619J13.13 | KIAA1324 | -0.483369949 | 4.38E-27    |
| CTD-2619J13.13 | JUN      | -0.418383854 | 4.96E-20    |
| CTD-2619J13.13 | C7       | -0.153900401 | 0.001217838 |
| CTD-2619J13.13 | LGI3     | -0.613672903 | 8.90E-47    |
| CTD-2619J13.13 | CDON     | -0.711595428 | 5.46E-69    |
| CTD-2619J13.13 | BCL2     | -0.698530383 | 1.67E-65    |
| CTD-2619J13.13 | HLF      | -0.646169638 | 3.03E-53    |
| CTD-2619J13.13 | EGR1     | -0.452214284 | 1.63E-23    |
| CTD-2619J13.13 | IP6K3    | -0.492922964 | 2.96E-28    |
| CTD-2619J13.13 | SCUBE3   | -0.424356049 | 1.28E-20    |
| CTD-2619J13.13 | PKNOX2   | -0.535449146 | 6.16E-34    |
| CTD-2619J13.13 | SMAD9    | -0.590393739 | 1.38E-42    |
| CTD-2619J13.13 | IQGAP2   | -0.678188666 | 1.94E-60    |
| CTD-2619J13.13 | GNA14    | -0.595276199 | 1.94E-43    |
| CTD-2619J13.13 | LAYN     | -0.491433249 | 4.53E-28    |
| CTD-2619J13.13 | AVPR1A   | -0.642521728 | 1.76E-52    |
| CTD-2619J13.13 | PDLIM3   | -0.463760111 | 8.55E-25    |
| CTD-2619J13.13 | GPM6A    | -0.606001357 | 2.34E-45    |
| CTD-2619J13.13 | SDPR     | -0.552037711 | 2.22E-36    |
| CTD-2619J13.13 | CRYAB    | -0.329162754 | 1.49E-12    |
| CTD-2619J13.13 | FOXA2    | -0.392593817 | 1.25E-17    |
| CTD-2619J13.13 | C8orf88  | -0.633480603 | 1.26E-50    |
| CTD-2619J13.13 | ISM1     | -0.457624662 | 4.15E-24    |
| CTD-2619J13.13 | BMP2     | -0.381243796 | 1.23E-16    |
| CTD-2619J13.13 | ID4      | -0.568912502 | 5.19E-39    |
| CTD-2619J13.13 | NUPR1    | -0.35290218  | 2.55E-14    |
| CTD-2619J13.13 | SERTM1   | -0.584422237 | 1.45E-41    |
| CTD-2619J13.13 | IRS1     | -0.640338713 | 5.00E-52    |
| CTD-2619J13.13 | FIBIN    | -0.385490542 | 5.29E-17    |
| CTD-2619J13.13 | PODN     | -0.207708878 | 1.15E-05    |
| CTD-2619J13.13 | TDRD9    | -0.510906781 | 1.47E-30    |
| CTD-2619J13.13 | EPHA3    | -0.431699809 | 2.35E-21    |
| CTD-2619J13.13 | AIF1L    | -0.499913692 | 3.90E-29    |
| CTD-2619J13.13 | EBF4     | -0.516580834 | 2.57E-31    |
| CTD-2619J13.13 | ADM2     | -0.534418841 | 8.65E-34    |
| CTD-2619J13.13 | GSTM3    | -0.55801331  | 2.70E-37    |

|                |          |              |             |
|----------------|----------|--------------|-------------|
| CTD-2619J13.13 | HSD17B6  | -0.321133353 | 5.47E-12    |
| CTD-2619J13.13 | AGR3     | -0.395637803 | 6.69E-18    |
| CTD-2619J13.13 | EPHB1    | -0.648368256 | 1.03E-53    |
| CTD-2619J13.13 | TMOD1    | -0.483203432 | 4.59E-27    |
| CTD-2619J13.13 | WASF3    | -0.7360039   | 4.73E-76    |
| CTD-2619J13.13 | SELV     | -0.47460919  | 4.82E-26    |
| CTD-2619J13.13 | ENPP1    | -0.440044656 | 3.24E-22    |
| CTD-2619J13.13 | SYNE1    | -0.699088182 | 1.19E-65    |
| CTD-2619J13.13 | PLCH1    | -0.632569583 | 1.91E-50    |
| CTD-2619J13.13 | CCDC146  | -0.593100842 | 4.67E-43    |
| CTD-2619J13.13 | SLC16A2  | -0.583765405 | 1.87E-41    |
| CTD-2619J13.13 | IER2     | -0.36686165  | 1.97E-15    |
| CTD-2619J13.13 | KCNAB1   | -0.504507797 | 1.00E-29    |
| CTD-2619J13.13 | SYNDIG1  | -0.496454142 | 1.07E-28    |
| CTD-2619J13.13 | C16orf89 | -0.495950904 | 1.24E-28    |
| CTD-2619J13.13 | CTGF     | -0.346610851 | 7.75E-14    |
| CTD-2619J13.13 | NR4A3    | -0.233478419 | 7.56E-07    |
| CTD-2619J13.13 | KIAA1456 | -0.604970626 | 3.60E-45    |
| CTD-2619J13.13 | AQP4     | -0.533599165 | 1.13E-33    |
| CTD-2619J13.13 | RNF150   | -0.590033614 | 1.59E-42    |
| CTD-2619J13.13 | C1S      | -0.106618987 | 0.025488491 |
| CTD-2619J13.13 | PFKFB2   | -0.616823957 | 2.26E-47    |
| CTD-2619J13.13 | PROX1    | -0.662287161 | 9.36E-57    |
| CTD-2619J13.13 | TCF7L1   | -0.591728001 | 8.10E-43    |
| CTD-2619J13.13 | HSPB6    | -0.293613825 | 3.54E-10    |
| CTD-2619J13.13 | FHDC1    | -0.446540088 | 6.67E-23    |
| CTD-2619J13.13 | PRR15L   | -0.472760104 | 7.93E-26    |
| CTD-2619J13.13 | SLC1A1   | -0.564336268 | 2.78E-38    |
| CTD-2619J13.13 | BTBD11   | -0.584322399 | 1.50E-41    |
| CTD-2619J13.13 | TRIM58   | -0.655189488 | 3.49E-55    |
| CTD-2619J13.13 | LRIG1    | -0.671188435 | 8.66E-59    |
| CTD-2619J13.13 | ROR2     | -0.401170071 | 2.10E-18    |
| CTD-2619J13.13 | GPR125   | -0.631353471 | 3.36E-50    |
| CTD-2619J13.13 | FLRT1    | -0.597891676 | 6.72E-44    |
| CTD-2619J13.13 | PGF      | -0.465314079 | 5.70E-25    |
| CTD-2619J13.13 | DUSP1    | -0.371312784 | 8.47E-16    |
| CTD-2619J13.13 | PLA2G7   | -0.467138389 | 3.53E-25    |
| CTD-2619J13.13 | PLSCR4   | -0.569196034 | 4.67E-39    |
| CTD-2619J13.13 | FAM46B   | -0.334185633 | 6.49E-13    |
| CTD-2619J13.13 | GLDC     | -0.497452534 | 8.01E-29    |
| CTD-2619J13.13 | ZBTB16   | -0.556309987 | 4.94E-37    |
| CTD-2619J13.13 | OMD      | -0.196816439 | 3.29E-05    |
| CTD-2619J13.13 | HSD11B2  | -0.483646389 | 4.06E-27    |
| CTD-2619J13.13 | FGL2     | -0.235812207 | 5.81E-07    |
| CTD-2619J13.13 | CLCNKA   | -0.534913872 | 7.35E-34    |
| CTD-2619J13.13 | GATM     | -0.550536932 | 3.74E-36    |
| CTD-2619J13.13 | TNS3     | -0.641949415 | 2.32E-52    |
| CTD-2619J13.13 | TOB1     | -0.447733364 | 4.97E-23    |
| CTD-2619J13.13 | MARC2    | -0.643144393 | 1.31E-52    |
| CTD-2619J13.13 | LRRC2    | -0.654681002 | 4.51E-55    |
| CTD-2619J13.13 | SORD     | -0.553113971 | 1.52E-36    |

|                |          |              |             |
|----------------|----------|--------------|-------------|
| CTD-2619J13.13 | RIMS4    | -0.531616565 | 2.16E-33    |
| CTD-2619J13.13 | SLC29A4  | -0.504915863 | 8.90E-30    |
| CTD-2619J13.13 | SLC39A14 | -0.698186144 | 2.05E-65    |
| CTD-2619J13.13 | FAXDC2   | -0.576669718 | 2.85E-40    |
| CTD-2619J13.13 | HSPB8    | -0.347617469 | 6.49E-14    |
| CTD-2619J13.13 | CCL19    | 0.016220966  | 0.734669786 |
| CTD-2619J13.13 | KCNIP3   | -0.545640713 | 2.01E-35    |
| CTD-2619J13.13 | CGNL1    | -0.616891046 | 2.20E-47    |
| CTD-2619J13.13 | ATF3     | -0.158225016 | 0.000878779 |
| CTD-2619J13.13 | SGCD     | -0.459388123 | 2.65E-24    |
| CTD-2619J13.13 | STARD13  | -0.685268184 | 3.73E-62    |
| CTD-2619J13.13 | LDHD     | -0.51654041  | 2.60E-31    |
| CTD-2619J13.13 | RCAN1    | -0.475166939 | 4.15E-26    |
| CTD-2619J13.13 | ID3      | -0.39448713  | 8.49E-18    |
| CTD-2619J13.13 | SYTL3    | -0.610147824 | 4.04E-46    |
| CTD-2619J13.13 | MT1E     | -0.286850178 | 9.23E-10    |
| CTD-2619J13.13 | CAMK1D   | -0.594244333 | 2.95E-43    |
| CTD-2619J13.13 | PRKCQ    | -0.626330734 | 3.32E-49    |
| CTD-2619J13.13 | NUAK2    | -0.401264819 | 2.06E-18    |
| CTD-2619J13.13 | LIPG     | -0.612972369 | 1.20E-46    |
| CTD-2619J13.13 | SLC25A25 | -0.509826549 | 2.03E-30    |
| CTD-2619J13.13 | PRKX     | -0.472449055 | 8.62E-26    |
| CTD-2619J13.13 | SRPX     | -0.25144876  | 9.32E-08    |
| CTD-2619J13.13 | FAM189A1 | -0.546436136 | 1.54E-35    |
| CTD-2619J13.13 | PLEKHH1  | -0.576270304 | 3.31E-40    |
| CTD-2619J13.13 | WNT11    | -0.394575069 | 8.33E-18    |
| CTD-2619J13.13 | SNAI1    | -0.403403865 | 1.31E-18    |
| CTD-2619J13.13 | FDCSP    | -0.053878113 | 0.259965944 |
| CTD-2619J13.13 | MT1X     | -0.271215753 | 7.70E-09    |
| CTD-2619J13.13 | ACACB    | -0.724670402 | 1.12E-72    |
| CTD-2619J13.13 | ARC      | -0.175607159 | 0.000217595 |
| CTD-2619J13.13 | KLK4     | -0.27510523  | 4.60E-09    |
| CTD-2619J13.13 | ZFPM2    | -0.475778966 | 3.51E-26    |
| CTD-2619J13.13 | AKAP12   | -0.521938732 | 4.81E-32    |
| CTD-2619J13.13 | GJB6     | -0.473164407 | 7.11E-26    |
| CTD-2619J13.13 | ERO1LB   | -0.618018226 | 1.34E-47    |
| CTD-2619J13.13 | DNALI1   | -0.385334946 | 5.46E-17    |
| CTD-2619J13.13 | HKDC1    | -0.41349884  | 1.47E-19    |
| CTD-2619J13.13 | ZFP36L2  | -0.560197602 | 1.24E-37    |
| CTD-2619J13.13 | CAPSL    | -0.441131463 | 2.49E-22    |
| CTD-2619J13.13 | CYP7B1   | -0.6685592   | 3.51E-58    |
| CTD-2619J13.13 | CPQ      | -0.555727037 | 6.07E-37    |
| CTD-2619J13.13 | RPS6KA6  | -0.614384238 | 6.54E-47    |
| CTD-2619J13.13 | TLE1     | -0.566100439 | 1.46E-38    |
| CTD-2619J13.13 | TP53INP2 | -0.612555652 | 1.44E-46    |
| CTD-2619J13.13 | KATNAL2  | -0.65411805  | 5.98E-55    |
| CTD-2619J13.13 | SGPP2    | -0.364519493 | 3.05E-15    |
| CTD-2619J13.13 | CTH      | -0.53347378  | 1.18E-33    |
| CTD-2619J13.13 | KIF12    | -0.341507125 | 1.88E-13    |
| CTD-2619J13.13 | TMEM220  | -0.612978043 | 1.20E-46    |
| CTD-2619J13.13 | CENPJ    | -0.512260049 | 9.70E-31    |



|                |          |              |             |
|----------------|----------|--------------|-------------|
| CTD-2619J13.13 | FAM155B  | -0.360212466 | 6.77E-15    |
| CTD-2619J13.13 | WFS1     | -0.50049409  | 3.29E-29    |
| CTD-2619J13.13 | SELENBP1 | -0.446528458 | 6.69E-23    |
| CTD-2619J13.13 | SNTA1    | -0.47095934  | 1.28E-25    |
| CTD-2619J13.13 | FRAS1    | -0.405952678 | 7.58E-19    |
| CTD-2619J13.13 | FBLN7    | -0.518353231 | 1.48E-31    |
| CTD-2619J13.13 | AGPAT9   | -0.601059467 | 1.83E-44    |
| CTD-2619J13.13 | GPR83    | -0.379516503 | 1.73E-16    |
| CTD-2619J13.13 | PRTG     | -0.595035217 | 2.14E-43    |
| CTD-2619J13.13 | EGR3     | -0.19242947  | 4.94E-05    |
| CTD-2619J13.13 | GRAMD2   | -0.420719911 | 2.93E-20    |
| CTD-2619J13.13 | HYOU1    | -0.656913093 | 1.46E-55    |
| CTD-2619J13.13 | FBLN5    | -0.364600482 | 3.01E-15    |
| CTD-2619J13.13 | ITM2A    | -0.617964328 | 1.38E-47    |
| CTD-2619J13.13 | SRF      | -0.417529568 | 6.00E-20    |
| CTD-2619J13.13 | FGFR2    | -0.523411995 | 3.02E-32    |
| CTD-2619J13.13 | MT1A     | -0.263545918 | 2.08E-08    |
| CTD-2619J13.13 | MAMDC2   | -0.388954772 | 2.63E-17    |
| CTD-2619J13.13 | FHL2     | -0.347379466 | 6.77E-14    |
| CTD-2619J13.13 | FTCDNL1  | -0.585548156 | 9.32E-42    |
| CTD-2619J13.13 | PKIA     | -0.456196503 | 5.97E-24    |
| CTD-2619J13.13 | DNAJB4   | -0.563195614 | 4.20E-38    |
| CTD-2619J13.13 | SLC25A33 | -0.541269008 | 8.86E-35    |
| CTD-2619J13.13 | EYA2     | -0.412183159 | 1.96E-19    |
| CTD-2619J13.13 | LPAR1    | -0.368657025 | 1.40E-15    |
| CTD-2619J13.13 | STX11    | -0.396043509 | 6.15E-18    |
| CTD-2619J13.13 | ARHGEF28 | -0.602434862 | 1.04E-44    |
| CTD-2619J13.13 | OR2W3    | -0.554461282 | 9.49E-37    |
| CTD-2619J13.13 | ALDH1B1  | -0.611869252 | 1.93E-46    |
| CTD-2619J13.13 | CXCL12   | -0.31570411  | 1.29E-11    |
| CTD-2619J13.13 | OLFM2    | -0.318905516 | 7.80E-12    |
| CTD-2619J13.13 | TUB      | -0.586074088 | 7.58E-42    |
| CTD-2619J13.13 | HTRA3    | -0.226976745 | 1.55E-06    |
| CTD-2619J13.13 | CKB      | -0.229517474 | 1.17E-06    |
| CTD-2619J13.13 | RGS2     | -0.114397903 | 0.016487319 |
| CTD-2619J13.13 | SHANK2   | -0.656606441 | 1.71E-55    |
| CTD-2619J13.13 | CNTFR    | -0.439163911 | 4.00E-22    |
| CTD-2619J13.13 | CYTH3    | -0.654738304 | 4.38E-55    |
| CTD-2619J13.13 | PLAC9    | -0.261419345 | 2.72E-08    |
| CTD-2619J13.13 | WWOX     | -0.627667549 | 1.81E-49    |
| CTD-2619J13.13 | NPR3     | -0.537564222 | 3.06E-34    |
| CTD-2619J13.13 | SDC2     | -0.514281512 | 5.22E-31    |
| CTD-2619J13.13 | KLF15    | -0.532063919 | 1.87E-33    |
| CTD-2619J13.13 | TMEM164  | -0.684649632 | 5.29E-62    |
| CTD-2619J13.13 | LONRF3   | -0.401280279 | 2.05E-18    |
| CTD-2619J13.13 | GBP1     | -0.194113787 | 4.23E-05    |
| CTD-2619J13.13 | ARHGAP6  | -0.549567617 | 5.23E-36    |
| CTD-2619J13.13 | TMEM119  | -0.17322855  | 0.000265526 |
| CTD-2619J13.13 | SH3RF1   | -0.635418666 | 5.09E-51    |
| CTD-2619J13.13 | CRELD2   | -0.434663071 | 1.17E-21    |
| CTD-2619J13.13 | PCP4     | -0.060857499 | 0.203142057 |

|                |          |              |             |
|----------------|----------|--------------|-------------|
| CTD-2619J13.13 | GCSH     | -0.628428222 | 1.28E-49    |
| CTD-2619J13.13 | IMPA2    | -0.535673391 | 5.72E-34    |
| CTD-2619J13.13 | C1R      | -0.029392487 | 0.539071357 |
| CTD-2619J13.13 | SUCNR1   | -0.400347274 | 2.50E-18    |
| CTD-2619J13.13 | SFRP1    | -0.406846678 | 6.25E-19    |
| CTD-2619J13.13 | UGT8     | -0.595845391 | 1.54E-43    |
| CTD-2619J13.13 | TLE4     | -0.351189638 | 3.45E-14    |
| CTD-2619J13.13 | ANTXR1   | -0.503610394 | 1.31E-29    |
| CTD-2619J13.13 | GPX3     | -0.391210976 | 1.66E-17    |
| CTD-2619J13.13 | DPY19L2  | -0.520339093 | 7.96E-32    |
| CTD-2619J13.13 | FAM46C   | -0.529029455 | 5.01E-33    |
| CTD-2619J13.13 | IL33     | -0.356683854 | 1.29E-14    |
| CTD-2619J13.13 | PEG3     | -0.650902602 | 2.97E-54    |
| CTD-2619J13.13 | FAHD2A   | -0.530461018 | 3.15E-33    |
| CTD-2619J13.13 | PTGDS    | -0.063711972 | 0.182708384 |
| CTD-2619J13.13 | CHCHD10  | -0.281587311 | 1.91E-09    |
| CTD-2619J13.13 | CD36     | -0.585122077 | 1.10E-41    |
| CTD-2619J13.13 | ANKRD37  | -0.346056268 | 8.53E-14    |
| CTD-2619J13.13 | TSPAN33  | -0.481378271 | 7.61E-27    |
| CTD-2619J13.13 | PRDM16   | -0.546412449 | 1.55E-35    |
| CTD-2619J13.13 | UST      | -0.539232511 | 1.75E-34    |
| CTD-2619J13.13 | NEXN     | -0.540587197 | 1.11E-34    |
| CTD-2619J13.13 | NUPR1L   | -0.153090069 | 0.00129343  |
| CTD-2619J13.13 | SLC24A3  | -0.532582334 | 1.58E-33    |
| CTD-2619J13.13 | MARC1    | -0.584296869 | 1.52E-41    |
| CTD-2619J13.13 | MYH11    | -0.374425684 | 4.66E-16    |
| CTD-2619J13.13 | APOA1    | -0.392889207 | 1.18E-17    |
| CTD-2619J13.13 | TMEM178B | -0.524653779 | 2.04E-32    |
| CTD-2619J13.13 | CAPN6    | -0.296935294 | 2.19E-10    |
| CTD-2619J13.13 | PPM1L    | -0.689403588 | 3.52E-63    |
| CTD-2619J13.13 | FZD8     | -0.621051839 | 3.52E-48    |
| CTD-2619J13.13 | RCAN2    | -0.638030029 | 1.49E-51    |
| CTD-2619J13.13 | COPZ2    | -0.47664162  | 2.78E-26    |
| CTD-2619J13.13 | GAS1     | -0.338058922 | 3.38E-13    |
| CTD-2619J13.13 | DACT1    | -0.452746598 | 1.43E-23    |
| CTD-2619J13.13 | WBSCR17  | -0.516192058 | 2.90E-31    |
| CTD-2619J13.13 | NCS1     | -0.423612397 | 1.52E-20    |
| CTD-2619J13.13 | SPIRE2   | -0.280774726 | 2.14E-09    |
| CTD-2619J13.13 | C15orf52 | -0.486312077 | 1.93E-27    |
| CTD-2619J13.13 | SPAG5    | -0.38738506  | 3.62E-17    |
| CTD-2619J13.13 | ARL4D    | -0.36992902  | 1.10E-15    |
| CTD-2619J13.13 | FAM189A2 | -0.416472031 | 7.60E-20    |
| CTD-2619J13.13 | MAP1LC3A | -0.411412416 | 2.32E-19    |
| CTD-2619J13.13 | KLF6     | -0.18880156  | 6.88E-05    |
| CTD-2619J13.13 | ADD3     | -0.579374978 | 1.02E-40    |
| CTD-2619J13.13 | TSPAN7   | -0.48286671  | 5.04E-27    |
| CTD-2619J13.13 | KLF9     | -0.478517132 | 1.67E-26    |
| CTD-2619J13.13 | KCNQ1    | -0.539497321 | 1.61E-34    |
| CTD-2619J13.13 | MAN1A1   | -0.324221289 | 3.34E-12    |
| CTD-2619J13.13 | MLF1     | -0.352175264 | 2.90E-14    |
| CTD-2619J13.13 | RARB     | -0.60227799  | 1.10E-44    |

|                |          |              |             |
|----------------|----------|--------------|-------------|
| CTD-2619J13.13 | CDC42EP2 | -0.262322847 | 2.42E-08    |
| CTD-2619J13.13 | FAM3B    | -0.201802495 | 2.04E-05    |
| CTD-2619J13.13 | GADD45B  | -0.200322141 | 2.36E-05    |
| CTD-2619J13.13 | TMEM47   | -0.567433708 | 8.95E-39    |
| CTD-2619J13.13 | SDF2L1   | -0.338016938 | 3.40E-13    |
| CTD-2619J13.13 | CCDC85A  | -0.570175845 | 3.25E-39    |
| CTD-2619J13.13 | CRYBG3   | -0.473724455 | 6.12E-26    |
| CTD-2619J13.13 | FBLN2    | -0.148126211 | 0.001858724 |
| CTD-2619J13.13 | PEBP4    | -0.215962098 | 4.97E-06    |
| CTD-2619J13.13 | CDADC1   | -0.636986108 | 2.44E-51    |
| CTD-2619J13.13 | FAM63A   | -0.619460284 | 7.12E-48    |
| CTD-2619J13.13 | GLUL     | -0.432321339 | 2.03E-21    |
| CTD-2619J13.13 | FREM2    | -0.558311735 | 2.43E-37    |
| CTD-2619J13.13 | ACKR3    | -0.479068737 | 1.43E-26    |
| CTD-2619J13.13 | DENND6A  | -0.688306903 | 6.61E-63    |
| CTD-2619J13.13 | CLDN8    | -0.256866797 | 4.80E-08    |
| CTD-2619J13.13 | UTS2R    | -0.268710566 | 1.07E-08    |
| CTD-2619J13.13 | SCNN1B   | -0.351899958 | 3.04E-14    |
| CTD-2619J13.13 | TTC30A   | -0.662683879 | 7.62E-57    |
| CTD-2619J13.13 | CORO2B   | -0.522182409 | 4.45E-32    |
| CTD-2619J13.13 | TC2N     | -0.497733655 | 7.38E-29    |
| CTD-2619J13.13 | ALDH2    | -0.478810877 | 1.54E-26    |
| CTD-2619J13.13 | GPR183   | -0.087161341 | 0.068076563 |
| CTD-2619J13.13 | C4orf47  | -0.36988576  | 1.11E-15    |
| CTD-2619J13.13 | SLC25A42 | -0.521276353 | 5.93E-32    |
| CTD-2619J13.13 | LGMN     | -0.622089378 | 2.22E-48    |
| CTD-2619J13.13 | ACSF2    | -0.443580514 | 1.38E-22    |
| CTD-2619J13.13 | KIAA1467 | -0.674724719 | 1.29E-59    |
| CTD-2619J13.13 | PRKG1    | -0.613511067 | 9.54E-47    |
| CTD-2619J13.13 | GNAI1    | -0.566067958 | 1.48E-38    |
| CTD-2619J13.13 | ABCC4    | -0.545709504 | 1.97E-35    |
| CTD-2619J13.13 | PRPS1    | -0.707873905 | 5.61E-68    |
| CTD-2619J13.13 | TSPAN5   | -0.433112649 | 1.69E-21    |
| CTD-2619J13.13 | CR2      | -0.200684705 | 2.28E-05    |
| CTD-2619J13.13 | CCDC170  | -0.5658396   | 1.61E-38    |
| CTD-2619J13.13 | RRAD     | 0.024136144  | 0.614022453 |
| CTD-2619J13.13 | SCGB2A1  | -0.258869254 | 3.74E-08    |
| CTD-2619J13.13 | SESN3    | -0.454203408 | 9.89E-24    |
| CTD-2619J13.13 | SGK223   | -0.270242041 | 8.74E-09    |
| CTD-2619J13.13 | NDRG2    | -0.626567176 | 2.98E-49    |
| CTD-2619J13.13 | C3orf52  | -0.390606182 | 1.88E-17    |
| CTD-2619J13.13 | FLRT3    | 0.167473082  | 0.000425301 |
| CTD-2619J13.13 | MST1R    | 0.498946363  | 5.18E-29    |
| CTD-2619J13.13 | SDC1     | 0.337440654  | 3.75E-13    |
| CTD-2619J13.13 | ST8SIA4  | 0.371905663  | 7.57E-16    |
| CTD-2619J13.13 | UBTD1    | 0.622608927  | 1.76E-48    |
| CTD-2619J13.13 | EPHA2    | 0.310291037  | 2.98E-11    |
| CTD-2619J13.13 | TMEM130  | 0.321548084  | 5.12E-12    |
| CTD-2619J13.13 | SPINK2   | 0.491551115  | 4.38E-28    |
| CTD-2619J13.13 | MMP16    | 0.413779252  | 1.38E-19    |
| CTD-2619J13.13 | SIGLEC15 | 0.446153298  | 7.34E-23    |

|                |          |             |             |
|----------------|----------|-------------|-------------|
| CTD-2619J13.13 | RIN1     | 0.699988185 | 6.96E-66    |
| CTD-2619J13.13 | IL1RN    | 0.484188774 | 3.49E-27    |
| CTD-2619J13.13 | FCER1G   | 0.370065326 | 1.07E-15    |
| CTD-2619J13.13 | CD276    | 0.588382204 | 3.06E-42    |
| CTD-2619J13.13 | CTSB     | 0.467252709 | 3.42E-25    |
| CTD-2619J13.13 | FAM171A2 | 0.221293614 | 2.85E-06    |
| CTD-2619J13.13 | ASPHD1   | 0.689260616 | 3.82E-63    |
| CTD-2619J13.13 | C15orf48 | 0.481198989 | 7.99E-27    |
| CTD-2619J13.13 | DYSF     | 0.144504399 | 0.002405232 |
| CTD-2619J13.13 | PDZRN4   | 0.16268778  | 0.000622099 |
| CTD-2619J13.13 | EFHD2    | 0.386737858 | 4.12E-17    |
| CTD-2619J13.13 | ASF1B    | 0.406782284 | 6.34E-19    |
| CTD-2619J13.13 | AQP1     | 0.144091227 | 0.002476108 |
| CTD-2619J13.13 | ARRDC2   | 0.582195693 | 3.43E-41    |
| CTD-2619J13.13 | PRSS1    | 0.428436421 | 5.02E-21    |
| CTD-2619J13.13 | MAPK13   | 0.475326506 | 3.97E-26    |
| CTD-2619J13.13 | CST5     | 0.621693192 | 2.65E-48    |
| CTD-2619J13.13 | AHR      | 0.313467338 | 1.83E-11    |
| CTD-2619J13.13 | BAX      | 0.611796255 | 2.00E-46    |
| CTD-2619J13.13 | C1orf115 | 0.283445803 | 1.48E-09    |
| CTD-2619J13.13 | PLK3     | 0.427947082 | 5.63E-21    |
| CTD-2619J13.13 | JAG2     | 0.352622051 | 2.68E-14    |
| CTD-2619J13.13 | RAD23B   | 0.348414878 | 5.64E-14    |
| CTD-2619J13.13 | CA12     | -0.0865313  | 0.070100378 |
| CTD-2619J13.13 | ADTRP    | 0.341378053 | 1.92E-13    |
| CTD-2619J13.13 | UCP2     | 0.46696095  | 3.70E-25    |
| CTD-2619J13.13 | IGFBP2   | 0.314572533 | 1.54E-11    |
| CTD-2619J13.13 | LOXL2    | 0.2843998   | 1.30E-09    |
| CTD-2619J13.13 | GPX1     | 0.522437574 | 4.11E-32    |
| CTD-2619J13.13 | P3H3     | 0.690783379 | 1.59E-63    |
| CTD-2619J13.13 | C2orf81  | 0.568308843 | 6.49E-39    |
| CTD-2619J13.13 | CDT1     | 0.483715748 | 3.98E-27    |
| CTD-2619J13.13 | SNX25    | 0.258510406 | 3.92E-08    |
| CTD-2619J13.13 | MTHFD1L  | 0.473624034 | 6.29E-26    |
| CTD-2619J13.13 | CDC42BPG | 0.475865504 | 3.43E-26    |
| CTD-2619J13.13 | MSN      | 0.284519936 | 1.28E-09    |
| CTD-2619J13.13 | SIGLEC6  | 0.475793803 | 3.50E-26    |
| CTD-2619J13.13 | F2R      | 0.107317251 | 0.024535872 |
| CTD-2619J13.13 | TMEM184A | 0.58297367  | 2.54E-41    |
| CTD-2619J13.13 | CKS2     | 0.401261273 | 2.06E-18    |
| CTD-2619J13.13 | TAX1BP3  | 0.688121947 | 7.35E-63    |
| CTD-2619J13.13 | PMEPA1   | 0.519143548 | 1.16E-31    |
| CTD-2619J13.13 | CXCL16   | 0.568631806 | 5.76E-39    |
| CTD-2619J13.13 | FAXC     | 0.526604891 | 1.09E-32    |
| CTD-2619J13.13 | VTCN1    | 0.548919412 | 6.54E-36    |
| CTD-2619J13.13 | SH2D4A   | 0.435178365 | 1.04E-21    |
| CTD-2619J13.13 | RNF24    | 0.290430432 | 5.57E-10    |
| CTD-2619J13.13 | LY6G6C   | 0.599796052 | 3.08E-44    |
| CTD-2619J13.13 | NID1     | 0.241312794 | 3.10E-07    |
| CTD-2619J13.13 | STAC     | 0.544488995 | 2.98E-35    |
| CTD-2619J13.13 | RAB34    | 0.667076434 | 7.68E-58    |

|                |          |             |             |
|----------------|----------|-------------|-------------|
| CTD-2619J13.13 | HES4     | 0.469103259 | 2.10E-25    |
| CTD-2619J13.13 | EPHA10   | 0.604424128 | 4.52E-45    |
| CTD-2619J13.13 | ENTPD2   | 0.504158878 | 1.11E-29    |
| CTD-2619J13.13 | DDB2     | 0.568791515 | 5.43E-39    |
| CTD-2619J13.13 | NKAIN4   | 0.427055068 | 6.91E-21    |
| CTD-2619J13.13 | TRIM29   | 0.487180546 | 1.51E-27    |
| CTD-2619J13.13 | ADCY8    | 0.516946769 | 2.29E-31    |
| CTD-2619J13.13 | SFTA2    | 0.517936513 | 1.69E-31    |
| CTD-2619J13.13 | NRIP1    | 0.337243784 | 3.88E-13    |
| CTD-2619J13.13 | VWA1     | 0.295811875 | 2.58E-10    |
| CTD-2619J13.13 | APLNR    | 0.136371457 | 0.004202641 |
| CTD-2619J13.13 | REN      | 0.620535424 | 4.43E-48    |
| CTD-2619J13.13 | EDIL3    | 0.196002065 | 3.55E-05    |
| CTD-2619J13.13 | AGRN     | 0.303117907 | 8.81E-11    |
| CTD-2619J13.13 | TREM1    | 0.506819176 | 5.03E-30    |
| CTD-2619J13.13 | SRL      | 0.300940423 | 1.22E-10    |
| CTD-2619J13.13 | RASGRF1  | 0.518861717 | 1.26E-31    |
| CTD-2619J13.13 | RMI2     | 0.522429631 | 4.12E-32    |
| CTD-2619J13.13 | SAMD1    | 0.678256748 | 1.87E-60    |
| CTD-2619J13.13 | MGAT4B   | 0.523997357 | 2.51E-32    |
| CTD-2619J13.13 | NXN      | 0.625210079 | 5.50E-49    |
| CTD-2619J13.13 | SH3BGRL3 | 0.671359632 | 7.90E-59    |
| CTD-2619J13.13 | CA11     | 0.477320027 | 2.31E-26    |
| CTD-2619J13.13 | PLD3     | 0.439295756 | 3.88E-22    |
| CTD-2619J13.13 | LURAP1L  | 0.406128982 | 7.30E-19    |
| CTD-2619J13.13 | CARNS1   | 0.284799922 | 1.23E-09    |
| CTD-2619J13.13 | PDLIM7   | 0.571351392 | 2.10E-39    |
| CTD-2619J13.13 | BCL2L1   | 0.661312456 | 1.55E-56    |
| CTD-2619J13.13 | GGT6     | 0.455974245 | 6.32E-24    |
| CTD-2619J13.13 | DPYSL3   | 0.375704204 | 3.64E-16    |
| CTD-2619J13.13 | FYN      | 0.561148336 | 8.79E-38    |
| CTD-2619J13.13 | TK1      | 0.401196311 | 2.09E-18    |
| CTD-2619J13.13 | AK1      | 0.459028566 | 2.90E-24    |
| CTD-2619J13.13 | HIGD1B   | 0.170404998 | 0.000335189 |
| CTD-2619J13.13 | TMEM59L  | 0.404403533 | 1.06E-18    |
| CTD-2619J13.13 | MEGF9    | 0.217208846 | 4.37E-06    |
| CTD-2619J13.13 | ZFP36L1  | 0.339535446 | 2.63E-13    |
| CTD-2619J13.13 | ADRA1B   | 0.253496889 | 7.27E-08    |
| CTD-2619J13.13 | EPHA4    | 0.344363583 | 1.15E-13    |
| CTD-2619J13.13 | TCERG1L  | 0.227492182 | 1.46E-06    |
| CTD-2619J13.13 | NGFR     | 0.221877416 | 2.68E-06    |
| CTD-2619J13.13 | EBI3     | 0.573420087 | 9.70E-40    |
| CTD-2619J13.13 | S100A10  | 0.55623297  | 5.08E-37    |
| CTD-2619J13.13 | S100B    | 0.484004244 | 3.67E-27    |
| CTD-2619J13.13 | CD44     | 0.257407197 | 4.49E-08    |
| CTD-2619J13.13 | BHLHE41  | 0.340092725 | 2.39E-13    |
| CTD-2619J13.13 | FBXO2    | 0.57172414  | 1.83E-39    |
| CTD-2619J13.13 | SLC30A2  | 0.377741978 | 2.45E-16    |
| CTD-2619J13.13 | FRMD5    | 0.498700984 | 5.57E-29    |
| CTD-2619J13.13 | SAMD11   | 0.415504276 | 9.42E-20    |
| CTD-2619J13.13 | SIPA1L2  | 0.302676935 | 9.40E-11    |

|                |          |             |          |
|----------------|----------|-------------|----------|
| CTD-2619J13.13 | S100A16  | 0.660160597 | 2.80E-56 |
| CTD-2619J13.13 | PPL      | 0.418419597 | 4.92E-20 |
| CTD-2619J13.13 | ARHGDIB  | 0.244069824 | 2.25E-07 |
| CTD-2619J13.13 | CDC42EP3 | 0.52628207  | 1.21E-32 |
| CTD-2619J13.13 | RUNX2    | 0.46748901  | 3.22E-25 |
| CTD-2619J13.13 | LAMC2    | 0.444264595 | 1.17E-22 |
| CTD-2619J13.13 | BRINP1   | 0.491035112 | 5.08E-28 |
| CTD-2619J13.13 | GPRC5B   | 0.297050823 | 2.15E-10 |
| CTD-2619J13.13 | AQP5     | 0.289197016 | 6.64E-10 |
| CTD-2619J13.13 | PLAG1    | 0.352661198 | 2.66E-14 |
| CTD-2619J13.13 | PTPRU    | 0.526690135 | 1.06E-32 |
| CTD-2619J13.13 | ANGPTL4  | 0.407931874 | 4.95E-19 |
| CTD-2619J13.13 | PALM3    | 0.412281736 | 1.92E-19 |
| CTD-2619J13.13 | ACP5     | 0.463477288 | 9.20E-25 |
| CTD-2619J13.13 | DLG4     | 0.384195568 | 6.86E-17 |
| CTD-2619J13.13 | ETNK2    | 0.570205348 | 3.22E-39 |
| CTD-2619J13.13 | CD109    | 0.41766403  | 5.82E-20 |
| CTD-2619J13.13 | SNX22    | 0.414822181 | 1.10E-19 |
| CTD-2619J13.13 | TMEM98   | 0.477880851 | 1.98E-26 |
| CTD-2619J13.13 | CTHRC1   | 0.446309036 | 7.06E-23 |
| CTD-2619J13.13 | S100A2   | 0.55990485  | 1.37E-37 |
| CTD-2619J13.13 | C11orf80 | 0.696665933 | 5.06E-65 |
| CTD-2619J13.13 | SREBF1   | 0.557274196 | 3.51E-37 |
| CTD-2619J13.13 | PRSS22   | 0.68724823  | 1.21E-62 |
| CTD-2619J13.13 | CMTM3    | 0.586675194 | 5.99E-42 |
| CTD-2619J13.13 | RDH5     | 0.450558902 | 2.47E-23 |
| CTD-2619J13.13 | MYH10    | 0.27858476  | 2.88E-09 |
| CTD-2619J13.13 | EVPL     | 0.462614635 | 1.15E-24 |
| CTD-2619J13.13 | SCD      | 0.377952464 | 2.35E-16 |
| CTD-2619J13.13 | CD151    | 0.563045266 | 4.44E-38 |
| CTD-2619J13.13 | S100A4   | 0.498159876 | 6.52E-29 |
| CTD-2619J13.13 | BNIP1    | 0.553815497 | 1.19E-36 |
| CTD-2619J13.13 | MAP3K6   | 0.606779475 | 1.68E-45 |
| CTD-2619J13.13 | MANEAL   | 0.52707111  | 9.40E-33 |
| CTD-2619J13.13 | CD207    | 0.47712619  | 2.44E-26 |
| CTD-2619J13.13 | CD1A     | 0.512137511 | 1.01E-30 |
| CTD-2619J13.13 | C3       | 0.389763386 | 2.23E-17 |
| CTD-2619J13.13 | NT5E     | 0.401829898 | 1.83E-18 |
| CTD-2619J13.13 | CACNG4   | 0.601285982 | 1.67E-44 |
| CTD-2619J13.13 | FHOD1    | 0.598448103 | 5.35E-44 |
| CTD-2619J13.13 | LEMD1    | 0.553889253 | 1.16E-36 |
| CTD-2619J13.13 | ATP11A   | 0.309041168 | 3.61E-11 |
| CTD-2619J13.13 | PPAP2C   | 0.53896146  | 1.92E-34 |
| CTD-2619J13.13 | DRAM1    | 0.528217579 | 6.50E-33 |
| CTD-2619J13.13 | CDA      | 0.318958422 | 7.73E-12 |
| CTD-2619J13.13 | CCND2    | 0.344277204 | 1.16E-13 |
| CTD-2619J13.13 | LCN6     | 0.290475334 | 5.54E-10 |
| CTD-2619J13.13 | CDH4     | 0.462859871 | 1.08E-24 |
| CTD-2619J13.13 | MMP11    | 0.589092666 | 2.31E-42 |
| CTD-2619J13.13 | B3GAT1   | 0.324181007 | 3.36E-12 |
| CTD-2619J13.13 | SPP1     | 0.306037341 | 5.69E-11 |

|                |          |             |             |
|----------------|----------|-------------|-------------|
| CTD-2619J13.13 | HLA-DQB1 | 0.314074543 | 1.66E-11    |
| CTD-2619J13.13 | SDC3     | 0.507852459 | 3.69E-30    |
| CTD-2619J13.13 | CX3CL1   | 0.369240259 | 1.26E-15    |
| CTD-2619J13.13 | SDK1     | 0.45535087  | 7.40E-24    |
| CTD-2619J13.13 | DOCK9    | 0.27328076  | 5.86E-09    |
| CTD-2619J13.13 | CSF2     | 0.66207865  | 1.04E-56    |
| CTD-2619J13.13 | GRHL3    | 0.612990808 | 1.19E-46    |
| CTD-2619J13.13 | TMEM92   | 0.63522656  | 5.57E-51    |
| CTD-2619J13.13 | BASP1    | 0.562275232 | 5.86E-38    |
| CTD-2619J13.13 | HRH1     | 0.512581452 | 8.79E-31    |
| CTD-2619J13.13 | ESM1     | 0.101654403 | 0.033225945 |
| CTD-2619J13.13 | B4GALNT3 | 0.377584964 | 2.53E-16    |
| CTD-2619J13.13 | LMO3     | 0.315291648 | 1.38E-11    |
| CTD-2619J13.13 | C9orf16  | 0.667353726 | 6.64E-58    |
| CTD-2619J13.13 | SEMA3F   | 0.304871865 | 6.78E-11    |
| CTD-2619J13.13 | PLA2G12B | 0.392078166 | 1.39E-17    |
| CTD-2619J13.13 | KLK6     | 0.539855072 | 1.42E-34    |
| CTD-2619J13.13 | ST3GAL5  | 0.458160381 | 3.62E-24    |
| CTD-2619J13.13 | FAM132B  | 0.215904654 | 5.00E-06    |
| CTD-2619J13.13 | CDKN1A   | 0.303190669 | 8.71E-11    |
| CTD-2619J13.13 | E2F1     | 0.470455676 | 1.47E-25    |
| CTD-2619J13.13 | B3GNT8   | 0.53679745  | 3.94E-34    |
| CTD-2619J13.13 | MTMR11   | 0.625561977 | 4.69E-49    |
| CTD-2619J13.13 | MYO1G    | 0.479854657 | 1.16E-26    |
| CTD-2619J13.13 | TMSB10   | 0.695143737 | 1.24E-64    |
| CTD-2619J13.13 | UNC5CL   | 0.584257438 | 1.54E-41    |
| CTD-2619J13.13 | ABR      | 0.431948024 | 2.22E-21    |
| CTD-2619J13.13 | PLP2     | 0.670509886 | 1.24E-58    |
| CTD-2619J13.13 | SRCIN1   | 0.509575639 | 2.19E-30    |
| CTD-2619J13.13 | PDE9A    | 0.62740359  | 2.04E-49    |
| CTD-2619J13.13 | TREM2    | 0.435228576 | 1.02E-21    |
| CTD-2619J13.13 | KDEL3    | 0.408004069 | 4.87E-19    |
| CTD-2619J13.13 | PC       | 0.405374125 | 8.58E-19    |
| CTD-2619J13.13 | C2CD4A   | 0.499050046 | 5.03E-29    |
| CTD-2619J13.13 | PELI1    | 0.469755851 | 1.77E-25    |
| CTD-2619J13.13 | SSX1     | 0.31742502  | 9.85E-12    |
| CTD-2619J13.13 | MROH6    | 0.657644831 | 1.01E-55    |
| CTD-2619J13.13 | ESPN     | 0.618248002 | 1.21E-47    |
| CTD-2619J13.13 | BMP1     | 0.494813654 | 1.72E-28    |
| CTD-2619J13.13 | TM4SF4   | 0.478942842 | 1.49E-26    |
| CTD-2619J13.13 | CORO2A   | 0.419623368 | 3.75E-20    |
| CTD-2619J13.13 | CD164L2  | 0.582271384 | 3.33E-41    |
| CTD-2619J13.13 | CTSS     | 0.359514486 | 7.69E-15    |
| CTD-2619J13.13 | CLU      | 0.472002836 | 9.71E-26    |
| CTD-2619J13.13 | TMSB4X   | 0.55702669  | 3.83E-37    |
| CTD-2619J13.13 | WNT10A   | 0.638108984 | 1.44E-51    |
| CTD-2619J13.13 | NAPSA    | 0.524556904 | 2.10E-32    |
| CTD-2619J13.13 | PLEKHA4  | 0.496728597 | 9.88E-29    |
| CTD-2619J13.13 | SFTPA1   | 0.285497329 | 1.11E-09    |
| CTD-2619J13.13 | C1orf116 | 0.495397881 | 1.45E-28    |
| CTD-2619J13.13 | TM4SF1   | 0.463155318 | 1.00E-24    |

|                |          |             |          |
|----------------|----------|-------------|----------|
| CTD-2619J13.13 | SEL1L3   | 0.365881272 | 2.37E-15 |
| CTD-2619J13.13 | VASN     | 0.604535186 | 4.32E-45 |
| CTD-2619J13.13 | NPTXR    | 0.481496705 | 7.36E-27 |
| CTD-2619J13.13 | PDE4C    | 0.593341115 | 4.24E-43 |
| CTD-2619J13.13 | CDC42EP1 | 0.589170251 | 2.24E-42 |
| CTD-2619J13.13 | ENDOD1   | 0.45519797  | 7.69E-24 |
| CTD-2619J13.13 | RYR1     | 0.556269422 | 5.01E-37 |
| CTD-2619J13.13 | IL1RAP   | 0.358844305 | 8.69E-15 |
| CTD-2619J13.13 | SLC35F2  | 0.49833336  | 6.20E-29 |
| CTD-2619J13.13 | ISYNA1   | 0.608221676 | 9.15E-46 |
| CTD-2619J13.13 | HLA-G    | 0.491538917 | 4.40E-28 |
| CTD-2619J13.13 | CDKN2B   | 0.454749765 | 8.62E-24 |
| CTD-2619J13.13 | ALDH1A3  | 0.421047981 | 2.72E-20 |
| CTD-2619J13.13 | CLIP3    | 0.556777908 | 4.19E-37 |
| CTD-2619J13.13 | ULBP2    | 0.44968249  | 3.07E-23 |
| CTD-2619J13.13 | ETHE1    | 0.621812511 | 2.51E-48 |
| CTD-2619J13.13 | XPR1     | 0.453324159 | 1.23E-23 |
| CTD-2619J13.13 | SPTBN2   | 0.536938295 | 3.76E-34 |
| CTD-2619J13.13 | IVL      | 0.617636622 | 1.59E-47 |
| CTD-2619J13.13 | MARCO    | 0.477226982 | 2.37E-26 |
| CTD-2619J13.13 | PLXND1   | 0.349001658 | 5.09E-14 |
| CTD-2619J13.13 | EMILIN2  | 0.469108507 | 2.10E-25 |
| CTD-2619J13.13 | PLAUR    | 0.570310733 | 3.09E-39 |
| CTD-2619J13.13 | CDC42EP5 | 0.688367467 | 6.38E-63 |
| CTD-2619J13.13 | TRPC5    | 0.243899206 | 2.29E-07 |
| CTD-2619J13.13 | TMEM100  | 0.418919856 | 4.40E-20 |
| CTD-2619J13.13 | QSOX1    | 0.594447019 | 2.72E-43 |
| CTD-2619J13.13 | ARHGAP23 | 0.445607935 | 8.39E-23 |
| CTD-2619J13.13 | MDF1     | 0.48610386  | 2.04E-27 |
| CTD-2619J13.13 | FSTL3    | 0.617470876 | 1.71E-47 |
| CTD-2619J13.13 | INF2     | 0.4987207   | 5.53E-29 |
| CTD-2619J13.13 | TGFBR1   | 0.413385938 | 1.50E-19 |
| CTD-2619J13.13 | TGFBI    | 0.382562739 | 9.49E-17 |
| CTD-2619J13.13 | ERBB3    | 0.618163609 | 1.26E-47 |
| CTD-2619J13.13 | CCL18    | 0.326748969 | 2.21E-12 |
| CTD-2619J13.13 | CCL17    | 0.539818246 | 1.44E-34 |
| CTD-2619J13.13 | C16orf45 | 0.403782428 | 1.21E-18 |
| CTD-2619J13.13 | PRDM1    | 0.296650842 | 2.28E-10 |
| CTD-2619J13.13 | TRIM47   | 0.671388142 | 7.78E-59 |
| CTD-2619J13.13 | CNFN     | 0.628428222 | 1.28E-49 |
| CTD-2619J13.13 | ARMCX3   | 0.331890566 | 9.51E-13 |
| CTD-2619J13.13 | RAMP1    | 0.447189561 | 5.69E-23 |
| CTD-2619J13.13 | GABRD    | 0.21260694  | 7.01E-06 |
| CTD-2619J13.13 | COL13A1  | 0.409678598 | 3.39E-19 |
| CTD-2619J13.13 | S100A5   | 0.595264001 | 1.95E-43 |
| CTD-2619J13.13 | MISP     | 0.541312127 | 8.74E-35 |
| CTD-2619J13.13 | HES6     | 0.339893018 | 2.47E-13 |
| CTD-2619J13.13 | PSD3     | 0.293324619 | 3.69E-10 |
| CTD-2619J13.13 | DOK7     | 0.566926214 | 1.08E-38 |
| CTD-2619J13.13 | ZMAT3    | 0.345896417 | 8.78E-14 |
| CTD-2619J13.13 | MFAP2    | 0.556661743 | 4.36E-37 |



|                |           |             |            |
|----------------|-----------|-------------|------------|
| CTD-2619J13.13 | TMEM79    | 0.700383911 | 5.48E-66   |
| CTD-2619J13.13 | SLC1A5    | 0.504631054 | 9.68E-30   |
| CTD-2619J13.13 | BBC3      | 0.632084358 | 2.40E-50   |
| CTD-2619J13.13 | HLA-DQB2  | 0.451975288 | 1.73E-23   |
| CTD-2619J13.13 | C1QL1     | 0.440351308 | 3.01E-22   |
| CTD-2619J13.13 | TMEM215   | 0.208990946 | 1.01E-05   |
| CTD-2619J13.13 | PNP       | 0.454769905 | 8.57E-24   |
| CTD-2619J13.13 | ARNTL     | 0.437918659 | 5.40E-22   |
| CTD-2619J13.13 | CLDN2     | 0.425224249 | 1.05E-20   |
| CTD-2619J13.13 | MVP       | 0.662288579 | 9.35E-57   |
| CTD-2619J13.13 | LGALS1    | 0.580050973 | 7.84E-41   |
| CTD-2619J13.13 | BIRC7     | 0.524927613 | 1.87E-32   |
| CTD-2619J13.13 | COL8A1    | 0.428108918 | 5.42E-21   |
| CTD-2619J13.13 | PERP      | 0.569949473 | 3.54E-39   |
| CTD-2619J13.13 | GJA4      | 0.361032569 | 5.82E-15   |
| CTD-2619J13.13 | IGFL2     | 0.634046299 | 9.65E-51   |
| CTD-2619J13.13 | DAPK2     | 0.469612312 | 1.84E-25   |
| CTD-2619J13.13 | MAMLD1    | 0.547961453 | 9.10E-36   |
| CTD-2619J13.13 | ETV5      | 0.254590169 | 6.36E-08   |
| CTD-2619J13.13 | RUNX1     | 0.557883812 | 2.83E-37   |
| CTD-2619J13.13 | LONRF2    | 0.290889417 | 5.22E-10   |
| CTD-2619J13.13 | SPOCK1    | 0.177529336 | 0.00018491 |
| CTD-2619J13.13 | XKRX      | 0.418079187 | 5.31E-20   |
| CTD-2619J13.13 | TGFB1     | 0.428684351 | 4.74E-21   |
| CTD-2619J13.13 | ERP27     | 0.297072949 | 2.15E-10   |
| CTD-2619J13.13 | TNFRSF10C | 0.387441937 | 3.58E-17   |
| CTD-2619J13.13 | PALM      | 0.61259721  | 1.41E-46   |
| CTD-2619J13.13 | TSC22D1   | 0.345335309 | 9.68E-14   |
| CTD-2619J13.13 | TGM2      | 0.418502855 | 4.83E-20   |
| CTD-2619J13.13 | UBE2QL1   | 0.364683883 | 2.96E-15   |
| CTD-2619J13.13 | ECE1      | 0.523684322 | 2.77E-32   |
| CTD-2619J13.13 | COL8A2    | 0.516435309 | 2.69E-31   |
| CTD-2619J13.13 | HIST3H2A  | 0.466875139 | 3.78E-25   |
| CTD-2619J13.13 | TNFRSF21  | 0.430307536 | 3.25E-21   |
| CTD-2619J13.13 | SOX4      | 0.564274002 | 2.84E-38   |
| CTD-2619J13.13 | ELF3      | 0.614885043 | 5.27E-47   |
| CTD-2619J13.13 | TPD52L1   | 0.438355943 | 4.86E-22   |
| CTD-2619J13.13 | INHBB     | 0.42248394  | 1.97E-20   |
| CTD-2619J13.13 | HPN       | 0.482132845 | 6.17E-27   |
| CTD-2619J13.13 | MMP7      | 0.461911472 | 1.38E-24   |
| CTD-2619J13.13 | RAB27A    | 0.373626431 | 5.44E-16   |
| CTD-2619J13.13 | IGF2BP2   | 0.500563448 | 3.23E-29   |
| CTD-2619J13.13 | ITGB4     | 0.567702064 | 8.11E-39   |
| CTD-2619J13.13 | PPP1R1B   | 0.612378355 | 1.55E-46   |
| CTD-2619J13.13 | NPDC1     | 0.539476896 | 1.62E-34   |
| CTD-2619J13.13 | CCL13     | 0.535067156 | 6.99E-34   |
| CTD-2619J13.13 | SPINT1    | 0.688814112 | 4.94E-63   |
| CTD-2619J13.13 | HEY2      | 0.405507451 | 8.34E-19   |
| CTD-2619J13.13 | CST2      | 0.561511922 | 7.72E-38   |
| CTD-2619J13.13 | ADM       | 0.327932316 | 1.83E-12   |
| CTD-2619J13.13 | VSTM2L    | 0.484474434 | 3.22E-27   |

|                |            |             |          |
|----------------|------------|-------------|----------|
| CTD-2619J13.13 | FAM84A     | 0.597436379 | 8.09E-44 |
| CTD-2619J13.13 | P4HA2      | 0.472351329 | 8.84E-26 |
| CTD-2619J13.13 | LPL        | 0.365314491 | 2.63E-15 |
| CTD-2619J13.13 | TMEM173    | 0.543497412 | 4.18E-35 |
| CTD-2619J13.13 | DHRS3      | 0.605267066 | 3.18E-45 |
| CTD-2619J13.13 | SCN1B      | 0.586141177 | 7.39E-42 |
| CTD-2619J13.13 | GLT1D1     | 0.224285669 | 2.07E-06 |
| CTD-2619J13.13 | PHYHIP     | 0.633595775 | 1.19E-50 |
| CTD-2619J13.13 | BHLHE40    | 0.450891794 | 2.27E-23 |
| CTD-2619J13.13 | BID        | 0.61753683  | 1.66E-47 |
| CTD-2619J13.13 | POSTN      | 0.325848587 | 2.56E-12 |
| CTD-2619J13.13 | ITGA3      | 0.635396397 | 5.15E-51 |
| CTD-2619J13.13 | RSP04      | 0.555074586 | 7.64E-37 |
| CTD-2619J13.13 | ADAMTS9    | 0.217795201 | 4.11E-06 |
| CTD-2619J13.13 | ABTB2      | 0.498483406 | 5.93E-29 |
| CTD-2619J13.13 | KCNQ3      | 0.50347579  | 1.37E-29 |
| CTD-2619J13.13 | ANXA1      | 0.407137019 | 5.87E-19 |
| CTD-2619J13.13 | S100A11    | 0.76095036  | 3.93E-84 |
| CTD-2619J13.13 | CEACAM6    | 0.529237087 | 4.68E-33 |
| CTD-2619J13.13 | IER5L      | 0.568362457 | 6.36E-39 |
| CTD-2619J13.13 | KRT80      | 0.507438862 | 4.18E-30 |
| CTD-2619J13.13 | CDH6       | 0.529773107 | 3.94E-33 |
| CTD-2619J13.13 | UNC5B      | 0.365505403 | 2.54E-15 |
| CTD-2619J13.13 | PLEKHN1    | 0.674301051 | 1.62E-59 |
| CTD-2619J13.13 | SYTL1      | 0.6422138   | 2.04E-52 |
| CTD-2619J13.13 | TMEM163    | 0.531486075 | 2.26E-33 |
| CTD-2619J13.13 | C4orf48    | 0.460498708 | 1.99E-24 |
| CTD-2619J13.13 | B3GNT7     | 0.462215505 | 1.28E-24 |
| CTD-2619J13.13 | BAIAP3     | 0.553891948 | 1.16E-36 |
| CTD-2619J13.13 | PHLDA2     | 0.590685639 | 1.23E-42 |
| CTD-2619J13.13 | GAP43      | 0.544904687 | 2.59E-35 |
| CTD-2619J13.13 | S100A1     | 0.549628607 | 5.12E-36 |
| CTD-2619J13.13 | PTPRE      | 0.530080894 | 3.56E-33 |
| CTD-2619J13.13 | CCND1      | 0.437504494 | 5.96E-22 |
| CTD-2619J13.13 | ST6GALNAC5 | 0.551143109 | 3.03E-36 |
| CTD-2619J13.13 | KRT17      | 0.410159568 | 3.05E-19 |
| CTD-2619J13.13 | HPCAL4     | 0.457473038 | 4.32E-24 |
| CTD-2619J13.13 | GABBR2     | 0.341225578 | 1.97E-13 |
| CTD-2619J13.13 | DIRAS3     | 0.461358667 | 1.59E-24 |
| CTD-2619J13.13 | SERINC2    | 0.516461407 | 2.66E-31 |
| CTD-2619J13.13 | PTCHD4     | 0.388166583 | 3.09E-17 |
| CTD-2619J13.13 | EPS8       | 0.256349234 | 5.12E-08 |
| CTD-2619J13.13 | LY6E       | 0.604263143 | 4.84E-45 |
| CTD-2619J13.13 | UPP1       | 0.627034955 | 2.41E-49 |
| CTD-2619J13.13 | AHNAK2     | 0.532215543 | 1.78E-33 |
| CTD-2619J13.13 | PLXNC1     | 0.438702309 | 4.47E-22 |
| CTD-2619J13.13 | TNC        | 0.317536504 | 9.68E-12 |
| CTD-2619J13.13 | DUSP4      | 0.405575675 | 8.22E-19 |
| CTD-2619J13.13 | NRCAM      | 0.292898398 | 3.92E-10 |
| CTD-2619J13.13 | NRP2       | 0.509724993 | 2.10E-30 |
| CTD-2619J13.13 | CTSC       | 0.576712836 | 2.80E-40 |

|                |         |             |             |
|----------------|---------|-------------|-------------|
| CTD-2619J13.13 | AMIG02  | 0.420894371 | 2.82E-20    |
| CTD-2619J13.13 | NAB2    | 0.504328373 | 1.06E-29    |
| CTD-2619J13.13 | TBC1D2  | 0.547967126 | 9.08E-36    |
| CTD-2619J13.13 | PHLDA3  | 0.686643862 | 1.71E-62    |
| CTD-2619J13.13 | PTP4A3  | 0.607420296 | 1.28E-45    |
| CTD-2619J13.13 | CRABP2  | 0.630902287 | 4.13E-50    |
| CTD-2619J13.13 | GOS2    | 0.422452452 | 1.98E-20    |
| CTD-2619J13.13 | S100A6  | 0.74409656  | 1.43E-78    |
| CTD-2619J13.13 | FOXQ1   | 0.527846108 | 7.33E-33    |
| CTD-2619J13.13 | LRG1    | 0.519372615 | 1.08E-31    |
| CTD-2619J13.13 | LAMP5   | 0.508360378 | 3.17E-30    |
| CTD-2619J13.13 | ALDH3B1 | 0.629747165 | 7.01E-50    |
| CTD-2619J13.13 | CDH2    | 0.07170875  | 0.133585085 |
| CTD-2619J13.13 | SCG5    | 0.412148551 | 1.97E-19    |
| CTD-2619J13.13 | ZCCHC16 | 0.290376727 | 5.62E-10    |
| CTD-2619J13.13 | GRB7    | 0.608751863 | 7.31E-46    |
| CTD-2619J13.13 | TIAM1   | 0.359635189 | 7.52E-15    |
| CTD-2619J13.13 | FXYD5   | 0.589102453 | 2.30E-42    |
| CTD-2619J13.13 | CLDN9   | 0.62691099  | 2.55E-49    |
| CTD-2619J13.13 | FAM43A  | 0.481894559 | 6.60E-27    |
| CTD-2619J13.13 | CHST2   | 0.491688698 | 4.21E-28    |
| CTD-2619J13.13 | HMGA2   | 0.506188284 | 6.08E-30    |
| CTD-2619J13.13 | GALNT7  | 0.3702795   | 1.03E-15    |
| CTD-2619J13.13 | CBLN1   | 0.448152493 | 4.48E-23    |
| CTD-2619J13.13 | STRA6   | 0.608187067 | 9.29E-46    |
| CTD-2619J13.13 | MUC21   | 0.571856379 | 1.74E-39    |
| CTD-2619J13.13 | PRR36   | 0.650538506 | 3.55E-54    |
| CTD-2619J13.13 | NFE2L3  | 0.551508091 | 2.67E-36    |
| CTD-2619J13.13 | NR1D1   | 0.457832595 | 3.94E-24    |
| CTD-2619J13.13 | MUC1    | 0.609944713 | 4.40E-46    |
| CTD-2619J13.13 | NAT8L   | 0.327951323 | 1.82E-12    |
| CTD-2619J13.13 | APOC1   | 0.355113279 | 1.71E-14    |
| CTD-2619J13.13 | EVA1A   | 0.545361578 | 2.22E-35    |
| CTD-2619J13.13 | ENTPD1  | 0.236384236 | 5.45E-07    |
| CTD-2619J13.13 | COL1A1  | 0.48353448  | 4.19E-27    |
| CTD-2619J13.13 | FNDC4   | 0.581519981 | 4.45E-41    |
| CTD-2619J13.13 | FRMD3   | 0.209505245 | 9.59E-06    |
| CTD-2619J13.13 | SHROOM4 | 0.435862162 | 8.81E-22    |
| CTD-2619J13.13 | NELL2   | 0.285785974 | 1.07E-09    |
| CTD-2619J13.13 | EPHB3   | 0.657203717 | 1.26E-55    |
| CTD-2619J13.13 | TMC6    | 0.581339989 | 4.77E-41    |
| CTD-2619J13.13 | NOD1    | 0.497745428 | 7.35E-29    |
| CTD-2619J13.13 | GGCT    | 0.619017469 | 8.66E-48    |
| CTD-2619J13.13 | ICAM1   | 0.496032744 | 1.21E-28    |
| CTD-2619J13.13 | PRSS23  | 0.459770658 | 2.40E-24    |
| CTD-2619J13.13 | CFI     | 0.545135773 | 2.39E-35    |
| CTD-2619J13.13 | CD55    | 0.549327203 | 5.68E-36    |
| CTD-2619J13.13 | RASD2   | 0.431725907 | 2.34E-21    |
| CTD-2619J13.13 | KLK11   | 0.514781441 | 4.48E-31    |
| CTD-2619J13.13 | ICAM5   | 0.575857274 | 3.87E-40    |
| CTD-2619J13.13 | ADORA1  | 0.496794268 | 9.70E-29    |

|                |           |             |          |
|----------------|-----------|-------------|----------|
| CTD-2619J13.13 | ITGA2     | 0.495829491 | 1.28E-28 |
| CTD-2619J13.13 | ABCC3     | 0.34670574  | 7.62E-14 |
| CTD-2619J13.13 | MFGE8     | 0.501318022 | 2.58E-29 |
| CTD-2619J13.13 | STK32A    | 0.321892749 | 4.85E-12 |
| CTD-2619J13.13 | CYSLTR2   | 0.39878125  | 3.47E-18 |
| CTD-2619J13.13 | LAD1      | 0.610446533 | 3.55E-46 |
| CTD-2619J13.13 | MGAT3     | 0.461318385 | 1.61E-24 |
| CTD-2619J13.13 | IGFBP6    | 0.60928432  | 5.83E-46 |
| CTD-2619J13.13 | CYP2S1    | 0.676423077 | 5.10E-60 |
| CTD-2619J13.13 | KCNJ2     | 0.512333095 | 9.49E-31 |
| CTD-2619J13.13 | FAM20A    | 0.596163674 | 1.36E-43 |
| CTD-2619J13.13 | TGFA      | 0.381630018 | 1.14E-16 |
| CTD-2619J13.13 | MXRA8     | 0.668619481 | 3.40E-58 |
| CTD-2619J13.13 | C8orf4    | 0.410657417 | 2.74E-19 |
| CTD-2619J13.13 | CLDN10    | 0.603965505 | 5.48E-45 |
| CTD-2619J13.13 | PDE5A     | 0.392588215 | 1.25E-17 |
| CTD-2619J13.13 | APOE      | 0.327326814 | 2.02E-12 |
| CTD-2619J13.13 | SPOCK2    | 0.439448514 | 3.74E-22 |
| CTD-2619J13.13 | TENM1     | 0.368790635 | 1.37E-15 |
| CTD-2619J13.13 | SLIT1     | 0.36184643  | 5.01E-15 |
| CTD-2619J13.13 | CXCL14    | 0.428294441 | 5.19E-21 |
| CTD-2619J13.13 | ECM1      | 0.395376166 | 7.06E-18 |
| CTD-2619J13.13 | DUSP5     | 0.53024656  | 3.38E-33 |
| CTD-2619J13.13 | SEZ6L2    | 0.659036253 | 4.97E-56 |
| CTD-2619J13.13 | THRSP     | 0.202109572 | 1.98E-05 |
| CTD-2619J13.13 | C19orf33  | 0.658441388 | 6.73E-56 |
| CTD-2619J13.13 | MPZL2     | 0.48869253  | 9.87E-28 |
| CTD-2619J13.13 | CTSH      | 0.578098869 | 1.65E-40 |
| CTD-2619J13.13 | CYP1B1    | 0.395653883 | 6.67E-18 |
| CTD-2619J13.13 | ALOX5     | 0.555936672 | 5.64E-37 |
| CTD-2619J13.13 | SYTL5     | 0.453513812 | 1.18E-23 |
| CTD-2619J13.13 | TNFRSF12A | 0.555941494 | 5.63E-37 |
| CTD-2619J13.13 | DUSP6     | 0.435625152 | 9.32E-22 |
| CTD-2619J13.13 | ALOX15B   | 0.607710636 | 1.14E-45 |
| CTD-2619J13.13 | SDC4      | 0.548952185 | 6.47E-36 |
| CTD-2619J13.13 | MDK       | 0.675550778 | 8.22E-60 |
| CTD-2619J13.13 | KRT19     | 0.702292897 | 1.73E-66 |
| CTD-2619J13.13 | MET       | 0.469467071 | 1.91E-25 |
| CTD-2619J13.13 | TESC      | 0.394126864 | 9.14E-18 |
| CTD-2619J13.13 | CXCL17    | 0.585615266 | 9.08E-42 |
| CTD-2619J13.13 | NPC2      | 0.583407691 | 2.15E-41 |
| CTD-2619J13.13 | COMP      | 0.523510146 | 2.93E-32 |
| CTD-2619J13.13 | TUSC3     | 0.487884058 | 1.24E-27 |
| CTD-2619J13.13 | TMPRSS4   | 0.653185613 | 9.54E-55 |
| CTD-2619J13.13 | LGALS3    | 0.671316372 | 8.08E-59 |
| CTD-2619J13.13 | CRLF1     | 0.416433309 | 7.66E-20 |
| CTD-2619J13.13 | CTXN1     | 0.648103588 | 1.18E-53 |
| CTD-2619J13.13 | PCSK1N    | 0.462526979 | 1.18E-24 |
| CTD-2619J13.13 | NMU       | 0.607524348 | 1.23E-45 |
| CTD-2619J13.13 | GALE      | 0.692189978 | 7.02E-64 |
| CTD-2619J13.13 | PCSK2     | 0.286626927 | 9.52E-10 |

|                |          |             |          |
|----------------|----------|-------------|----------|
| CTD-2619J13.13 | GJB3     | 0.610665104 | 3.24E-46 |
| CTD-2619J13.13 | SLPI     | 0.524696614 | 2.01E-32 |
| CTD-2619J13.13 | AGR2     | 0.297880428 | 1.91E-10 |
| CTD-2619J13.13 | MRC2     | 0.50265427  | 1.74E-29 |
| CTD-2619J13.13 | GOLT1A   | 0.617178408 | 1.94E-47 |
| CTD-2619J13.13 | SLC27A6  | 0.471626842 | 1.07E-25 |
| CTD-2619J13.13 | KCNN4    | 0.678556591 | 1.58E-60 |
| CTD-2619J13.13 | ETV4     | 0.497197954 | 8.62E-29 |
| CTD-2619J13.13 | SYT12    | 0.575961383 | 3.72E-40 |
| CTD-2619J13.13 | PVRL4    | 0.735357406 | 7.44E-76 |
| CTD-2619J13.13 | PLCD3    | 0.528804501 | 5.38E-33 |
| CTD-2619J13.13 | PLAU     | 0.543458123 | 4.23E-35 |
| CTD-2619J13.13 | LRRK2    | 0.267758047 | 1.21E-08 |
| CTD-2619J13.13 | SFN      | 0.660896022 | 1.92E-56 |
| CTD-2619J13.13 | LPAR5    | 0.431200826 | 2.64E-21 |
| CTD-2619J13.13 | NGEF     | 0.690203833 | 2.22E-63 |
| CTD-2619J13.13 | DTX4     | 0.483930205 | 3.75E-27 |
| CTD-2619J13.13 | CST6     | 0.68656571  | 1.79E-62 |
| CTD-2619J13.13 | QPCT     | 0.507914726 | 3.62E-30 |
| CTD-2619J13.13 | TIMP1    | 0.684687786 | 5.18E-62 |
| CTD-2619J13.13 | CAMK2N1  | 0.567076136 | 1.02E-38 |
| CTD-2619J13.13 | KLHDC8A  | 0.37570548  | 3.64E-16 |
| CTD-2619J13.13 | PDLIM4   | 0.69908454  | 1.20E-65 |
| CTD-2619J13.13 | SCEL     | 0.426302905 | 8.22E-21 |
| CTD-2619J13.13 | LCN2     | 0.603116105 | 7.80E-45 |
| CTD-2619J13.13 | PROS1    | 0.478856832 | 1.52E-26 |
| CTD-2619J13.13 | GABRB2   | 0.473034843 | 7.36E-26 |
| CTD-2619J13.13 | TMPRSS6  | 0.669340581 | 2.32E-58 |
| CTD-2619J13.13 | KLK7     | 0.542347906 | 6.16E-35 |
| CTD-2619J13.13 | PDZK1IP1 | 0.557421423 | 3.33E-37 |
| CTD-2619J13.13 | CDH3     | 0.524299044 | 2.28E-32 |
| CTD-2619J13.13 | LRP4     | 0.341864838 | 1.76E-13 |
| CTD-2619J13.13 | IGSF1    | 0.40811995  | 4.75E-19 |
| CTD-2619J13.13 | B3GNT3   | 0.588246891 | 3.23E-42 |
| CTD-2619J13.13 | CLDN1    | 0.410596001 | 2.77E-19 |
| CTD-2619J13.13 | GDF15    | 0.538675232 | 2.11E-34 |
| CTD-2619J13.13 | ARHGAP36 | 0.414155748 | 1.27E-19 |
| CTD-2619J13.13 | LAMB3    | 0.529554394 | 4.22E-33 |
| CTD-2619J13.13 | KLK10    | 0.663850065 | 4.16E-57 |
| CTD-2619J13.13 | DPP4     | 0.419007086 | 4.31E-20 |
| CTD-2619J13.13 | METTL7B  | 0.491214252 | 4.83E-28 |
| CTD-2619J13.13 | LIPH     | 0.607965518 | 1.02E-45 |
| CTD-2619J13.13 | CLDN16   | 0.357986758 | 1.02E-14 |
| CTD-2619J13.13 | CHI3L1   | 0.502101388 | 2.05E-29 |
| CTD-2619J13.13 | SLC22A31 | 0.716063552 | 3.16E-70 |
| CTD-2619J13.13 | TACSTD2  | 0.586610233 | 6.15E-42 |
| CTD-2619J13.13 | SFTPB    | 0.61758463  | 1.62E-47 |
| CTD-2619J13.13 | RXRG     | 0.469343815 | 1.97E-25 |
| CTD-2619J13.13 | DCSTAMP  | 0.563309215 | 4.03E-38 |
| CTD-2619J13.13 | CITED1   | 0.544097809 | 3.41E-35 |
| CTD-2619J13.13 | SERPINA1 | 0.716680716 | 2.12E-70 |

|                |           |              |             |
|----------------|-----------|--------------|-------------|
| CTD-2619J13.13 | PRR15     | 0.480287544  | 1.03E-26    |
| CTD-2619J13.13 | SLC34A2   | 0.504770905  | 9.29E-30    |
| CTD-2619J13.13 | FN1       | 0.556607987  | 4.45E-37    |
| CTD-2619J13.13 | ZCCHC12   | 0.37584363   | 3.54E-16    |
| RP11-476D10.1  | TFF3      | -0.313958186 | 1.69E-11    |
| RP11-476D10.1  | CCL21     | -0.255426107 | 5.74E-08    |
| RP11-476D10.1  | TPO       | -0.191634705 | 5.32E-05    |
| RP11-476D10.1  | MT1G      | -0.199247681 | 2.61E-05    |
| RP11-476D10.1  | DI01      | -0.266420811 | 1.44E-08    |
| RP11-476D10.1  | DPT       | -0.274196219 | 5.19E-09    |
| RP11-476D10.1  | CDH16     | -0.379642422 | 1.69E-16    |
| RP11-476D10.1  | CRABP1    | -0.305950687 | 5.76E-11    |
| RP11-476D10.1  | SLC26A7   | -0.204915322 | 1.51E-05    |
| RP11-476D10.1  | MT1H      | -0.221817285 | 2.69E-06    |
| RP11-476D10.1  | SLC26A4   | -0.103010978 | 0.030934868 |
| RP11-476D10.1  | SLC5A8    | -0.330320833 | 1.23E-12    |
| RP11-476D10.1  | PKHD1L1   | -0.372235033 | 7.10E-16    |
| RP11-476D10.1  | TFCP2L1   | -0.351144932 | 3.48E-14    |
| RP11-476D10.1  | WSCD2     | -0.230056035 | 1.10E-06    |
| RP11-476D10.1  | IPCEF1    | -0.312763751 | 2.04E-11    |
| RP11-476D10.1  | SLC5A5    | -0.243560652 | 2.38E-07    |
| RP11-476D10.1  | MT1F      | -0.236101245 | 5.62E-07    |
| RP11-476D10.1  | FOSB      | -0.143655499 | 0.002552911 |
| RP11-476D10.1  | SEMA3D    | -0.310395461 | 2.93E-11    |
| RP11-476D10.1  | BMP8A     | -0.168298914 | 0.000397869 |
| RP11-476D10.1  | MATN2     | -0.368627131 | 1.41E-15    |
| RP11-476D10.1  | PLA2R1    | -0.412662194 | 1.76E-19    |
| RP11-476D10.1  | COL23A1   | -0.234581998 | 6.68E-07    |
| RP11-476D10.1  | HGD       | -0.165813452 | 0.00048583  |
| RP11-476D10.1  | TCEAL2    | -0.220183541 | 3.20E-06    |
| RP11-476D10.1  | CHRD1     | -0.235214258 | 6.22E-07    |
| RP11-476D10.1  | TNFRSF11B | -0.346485774 | 7.92E-14    |
| RP11-476D10.1  | FAM167A   | -0.16734348  | 0.000429762 |
| RP11-476D10.1  | KIT       | -0.385997702 | 4.78E-17    |
| RP11-476D10.1  | SLC4A4    | -0.295681683 | 2.63E-10    |
| RP11-476D10.1  | SMOC2     | -0.247799211 | 1.45E-07    |
| RP11-476D10.1  | FHL1      | -0.2198705   | 3.31E-06    |
| RP11-476D10.1  | OTOS      | -0.208466427 | 1.06E-05    |
| RP11-476D10.1  | IGFBPL1   | -0.319279357 | 7.35E-12    |
| RP11-476D10.1  | HBB       | -0.177532552 | 0.00018486  |
| RP11-476D10.1  | BEX1      | -0.147309722 | 0.001970915 |
| RP11-476D10.1  | FABP4     | -0.199124734 | 2.64E-05    |
| RP11-476D10.1  | LMOD1     | -0.16076083  | 0.000722951 |
| RP11-476D10.1  | SOD3      | -0.217759496 | 4.13E-06    |
| RP11-476D10.1  | TMEM171   | -0.405608777 | 8.16E-19    |
| RP11-476D10.1  | PI16      | -0.222377663 | 2.54E-06    |
| RP11-476D10.1  | ZMAT4     | -0.26267166  | 2.32E-08    |
| RP11-476D10.1  | MFAP4     | -0.193912088 | 4.31E-05    |
| RP11-476D10.1  | CWH43     | -0.435093843 | 1.06E-21    |
| RP11-476D10.1  | SPX       | -0.201693143 | 2.07E-05    |
| RP11-476D10.1  | APOD      | -0.260499844 | 3.05E-08    |

|               |            |              |             |
|---------------|------------|--------------|-------------|
| RP11-476D10.1 | DPP6       | -0.358066154 | 1.00E-14    |
| RP11-476D10.1 | MMRN1      | -0.2672649   | 1.29E-08    |
| RP11-476D10.1 | WDR72      | -0.375907634 | 3.50E-16    |
| RP11-476D10.1 | MPPED2     | -0.208091118 | 1.10E-05    |
| RP11-476D10.1 | PAPSS2     | -0.316669598 | 1.11E-11    |
| RP11-476D10.1 | DCN        | -0.25217852  | 8.53E-08    |
| RP11-476D10.1 | SORBS2     | -0.245037729 | 2.00E-07    |
| RP11-476D10.1 | EGR2       | -0.150270205 | 0.001591387 |
| RP11-476D10.1 | EDN3       | 0.115244548  | 0.015700204 |
| RP11-476D10.1 | DIO2       | -0.248672094 | 1.30E-07    |
| RP11-476D10.1 | ITPR1      | -0.177572693 | 0.000184229 |
| RP11-476D10.1 | CFD        | -0.205520836 | 1.42E-05    |
| RP11-476D10.1 | CPXM1      | -0.261912286 | 2.55E-08    |
| RP11-476D10.1 | ELMO1      | -0.137058098 | 0.004013644 |
| RP11-476D10.1 | GPC3       | -0.259772427 | 3.34E-08    |
| RP11-476D10.1 | MYOC       | -0.158674148 | 0.000849095 |
| RP11-476D10.1 | DEPTOR     | -0.328378911 | 1.70E-12    |
| RP11-476D10.1 | DGKI       | -0.386640946 | 4.20E-17    |
| RP11-476D10.1 | CARTPT     | -0.081850576 | 0.086722544 |
| RP11-476D10.1 | IYD        | -0.266503078 | 1.42E-08    |
| RP11-476D10.1 | LYVE1      | -0.22050495  | 3.09E-06    |
| RP11-476D10.1 | CLCNKB     | -0.258972937 | 3.70E-08    |
| RP11-476D10.1 | NCAM1      | -0.380913449 | 1.32E-16    |
| RP11-476D10.1 | HBA2       | -0.160213327 | 0.000754253 |
| RP11-476D10.1 | GLT8D2     | -0.20749     | 1.17E-05    |
| RP11-476D10.1 | OGDHL      | -0.394551502 | 8.37E-18    |
| RP11-476D10.1 | LIFR       | -0.231463788 | 9.46E-07    |
| RP11-476D10.1 | CSGALNACT1 | -0.441883635 | 2.08E-22    |
| RP11-476D10.1 | RAP1GAP    | -0.43196349  | 2.21E-21    |
| RP11-476D10.1 | COL9A3     | -0.182876514 | 0.000116533 |
| RP11-476D10.1 | FBLN1      | -0.299961703 | 1.41E-10    |
| RP11-476D10.1 | EFEMP1     | -0.33103529  | 1.10E-12    |
| RP11-476D10.1 | AOX1       | -0.32979016  | 1.35E-12    |
| RP11-476D10.1 | GRIN2C     | -0.174394627 | 0.000240914 |
| RP11-476D10.1 | C11orf74   | -0.298125443 | 1.84E-10    |
| RP11-476D10.1 | PPARGC1A   | -0.365321551 | 2.63E-15    |
| RP11-476D10.1 | ANGPTL1    | -0.23929307  | 3.91E-07    |
| RP11-476D10.1 | SCARA5     | -0.282967282 | 1.58E-09    |
| RP11-476D10.1 | LTF        | -0.21197271  | 7.48E-06    |
| RP11-476D10.1 | CA4        | -0.053678638 | 0.261737024 |
| RP11-476D10.1 | TG         | -0.089825253 | 0.060042006 |
| RP11-476D10.1 | FCGBP      | -0.251976398 | 8.75E-08    |
| RP11-476D10.1 | PBX4       | -0.237552268 | 4.77E-07    |
| RP11-476D10.1 | CYR61      | -0.184268815 | 0.00010311  |
| RP11-476D10.1 | FOS        | -0.14701739  | 0.002012566 |
| RP11-476D10.1 | KHDRBS2    | -0.164385266 | 0.00054423  |
| RP11-476D10.1 | MUM1L1     | -0.361010184 | 5.84E-15    |
| RP11-476D10.1 | RGS16      | -0.199840572 | 2.47E-05    |
| RP11-476D10.1 | MT1M       | -0.240917279 | 3.24E-07    |
| RP11-476D10.1 | LRP2       | -0.231666478 | 9.25E-07    |
| RP11-476D10.1 | MAFB       | -0.238192675 | 4.43E-07    |

|               |          |              |             |
|---------------|----------|--------------|-------------|
| RP11-476D10.1 | KCNK2    | -0.361635273 | 5.21E-15    |
| RP11-476D10.1 | TBC1D4   | -0.158005589 | 0.000893628 |
| RP11-476D10.1 | MIOX     | -0.161013736 | 0.000708902 |
| RP11-476D10.1 | TPPP     | -0.330747922 | 1.15E-12    |
| RP11-476D10.1 | FMOD     | -0.384305835 | 6.71E-17    |
| RP11-476D10.1 | CITED2   | -0.400763808 | 2.29E-18    |
| RP11-476D10.1 | RGS8     | -0.270060874 | 8.95E-09    |
| RP11-476D10.1 | ABI3BP   | -0.338245865 | 3.27E-13    |
| RP11-476D10.1 | ADH1B    | -0.234927986 | 6.42E-07    |
| RP11-476D10.1 | OGN      | -0.289490216 | 6.37E-10    |
| RP11-476D10.1 | NR4A1    | -0.105453179 | 0.027150071 |
| RP11-476D10.1 | FOXJ1    | -0.143270298 | 0.00262261  |
| RP11-476D10.1 | ALDH1A1  | -0.248101189 | 1.39E-07    |
| RP11-476D10.1 | OCA2     | -0.406631803 | 6.55E-19    |
| RP11-476D10.1 | TMEM139  | -0.403591388 | 1.26E-18    |
| RP11-476D10.1 | ARHGAP24 | -0.134736036 | 0.004685591 |
| RP11-476D10.1 | SLC25A15 | -0.338671102 | 3.05E-13    |
| RP11-476D10.1 | DES      | -0.230359643 | 1.07E-06    |
| RP11-476D10.1 | GDF10    | -0.236455548 | 5.40E-07    |
| RP11-476D10.1 | KIAA1324 | -0.143029985 | 0.002666966 |
| RP11-476D10.1 | JUN      | -0.159481433 | 0.000798057 |
| RP11-476D10.1 | C7       | -0.18035616  | 0.000145101 |
| RP11-476D10.1 | LGI3     | -0.096252305 | 0.043837432 |
| RP11-476D10.1 | CDON     | -0.192095402 | 5.10E-05    |
| RP11-476D10.1 | BCL2     | -0.387135968 | 3.80E-17    |
| RP11-476D10.1 | HLF      | -0.06973944  | 0.144616279 |
| RP11-476D10.1 | EGR1     | -0.144369663 | 0.002428139 |
| RP11-476D10.1 | IP6K3    | -0.35914357  | 8.23E-15    |
| RP11-476D10.1 | SCUBE3   | -0.244372358 | 2.17E-07    |
| RP11-476D10.1 | PKNOX2   | -0.203784857 | 1.69E-05    |
| RP11-476D10.1 | SMAD9    | -0.464732774 | 6.63E-25    |
| RP11-476D10.1 | IQGAP2   | -0.288627982 | 7.19E-10    |
| RP11-476D10.1 | GNA14    | -0.162332842 | 0.000639635 |
| RP11-476D10.1 | LAYN     | -0.273559757 | 5.65E-09    |
| RP11-476D10.1 | AVPR1A   | -0.195901818 | 3.58E-05    |
| RP11-476D10.1 | PDLIM3   | -0.305259283 | 6.39E-11    |
| RP11-476D10.1 | GPM6A    | -0.303814644 | 7.94E-11    |
| RP11-476D10.1 | SDPR     | -0.036852572 | 0.441176933 |
| RP11-476D10.1 | CRYAB    | -0.523019631 | 3.42E-32    |
| RP11-476D10.1 | FOXA2    | -0.118166812 | 0.013230776 |
| RP11-476D10.1 | C8orf88  | -0.29976256  | 1.45E-10    |
| RP11-476D10.1 | ISM1     | -0.065166378 | 0.172900338 |
| RP11-476D10.1 | BMP2     | -0.3250617   | 2.91E-12    |
| RP11-476D10.1 | ID4      | -0.400092196 | 2.64E-18    |
| RP11-476D10.1 | NUPR1    | -0.402006042 | 1.76E-18    |
| RP11-476D10.1 | SERTM1   | -0.405562767 | 8.24E-19    |
| RP11-476D10.1 | IRS1     | -0.169976171 | 0.000347152 |
| RP11-476D10.1 | FIBIN    | -0.379173357 | 1.85E-16    |
| RP11-476D10.1 | PODN     | -0.258831948 | 3.76E-08    |
| RP11-476D10.1 | TDRD9    | -0.334831636 | 5.83E-13    |
| RP11-476D10.1 | EPHA3    | -0.225021134 | 1.91E-06    |



|               |          |              |             |
|---------------|----------|--------------|-------------|
| RP11-476D10.1 | AIF1L    | -0.434943548 | 1.09E-21    |
| RP11-476D10.1 | EBF4     | -0.180615727 | 0.00014188  |
| RP11-476D10.1 | ADM2     | -0.293889251 | 3.40E-10    |
| RP11-476D10.1 | GSTM3    | -0.235710051 | 5.88E-07    |
| RP11-476D10.1 | HSD17B6  | -0.095693597 | 0.045082086 |
| RP11-476D10.1 | AGR3     | -0.305339089 | 6.32E-11    |
| RP11-476D10.1 | EPHB1    | -0.418788545 | 4.53E-20    |
| RP11-476D10.1 | TMOD1    | -0.245418712 | 1.92E-07    |
| RP11-476D10.1 | WASF3    | -0.225748064 | 1.77E-06    |
| RP11-476D10.1 | SELV     | -0.194103217 | 4.23E-05    |
| RP11-476D10.1 | ENPP1    | -0.236410315 | 5.43E-07    |
| RP11-476D10.1 | SYNE1    | -0.181761091 | 0.000128454 |
| RP11-476D10.1 | PLCH1    | -0.259683839 | 3.38E-08    |
| RP11-476D10.1 | CCDC146  | -0.24610465  | 1.77E-07    |
| RP11-476D10.1 | SLC16A2  | -0.146753425 | 0.002050865 |
| RP11-476D10.1 | IER2     | -0.113288559 | 0.017570813 |
| RP11-476D10.1 | KCNAB1   | 0.04313679   | 0.367238038 |
| RP11-476D10.1 | SYNDIG1  | -0.338230121 | 3.28E-13    |
| RP11-476D10.1 | C16orf89 | 0.020105103  | 0.674419611 |
| RP11-476D10.1 | CTGF     | -0.125228504 | 0.008621851 |
| RP11-476D10.1 | NR4A3    | -0.156402088 | 0.001009375 |
| RP11-476D10.1 | KIAA1456 | -0.278024879 | 3.11E-09    |
| RP11-476D10.1 | AQP4     | -0.045605657 | 0.340429814 |
| RP11-476D10.1 | RNF150   | -0.286182236 | 1.01E-09    |
| RP11-476D10.1 | C1S      | -0.209356756 | 9.73E-06    |
| RP11-476D10.1 | PFKFB2   | -0.310926924 | 2.70E-11    |
| RP11-476D10.1 | PROX1    | -0.241781793 | 2.93E-07    |
| RP11-476D10.1 | TCF7L1   | -0.170845366 | 0.000323305 |
| RP11-476D10.1 | HSPB6    | -0.134884968 | 0.004639624 |
| RP11-476D10.1 | FHDC1    | -0.260977277 | 2.87E-08    |
| RP11-476D10.1 | PRR15L   | -0.227965873 | 1.39E-06    |
| RP11-476D10.1 | SLC1A1   | -0.343026865 | 1.44E-13    |
| RP11-476D10.1 | BTBD11   | -0.150742674 | 0.001537435 |
| RP11-476D10.1 | TRIM58   | -0.266603643 | 1.40E-08    |
| RP11-476D10.1 | LRIG1    | -0.411635415 | 2.21E-19    |
| RP11-476D10.1 | ROR2     | -0.450583813 | 2.45E-23    |
| RP11-476D10.1 | GPR125   | -0.364262858 | 3.20E-15    |
| RP11-476D10.1 | FLRT1    | -0.223151116 | 2.34E-06    |
| RP11-476D10.1 | PGF      | -0.1773605   | 0.000187585 |
| RP11-476D10.1 | DUSP1    | -0.157621202 | 0.000920199 |
| RP11-476D10.1 | PLA2G7   | -0.427080083 | 6.87E-21    |
| RP11-476D10.1 | PLSCR4   | -0.326553573 | 2.29E-12    |
| RP11-476D10.1 | FAM46B   | -0.366042382 | 2.30E-15    |
| RP11-476D10.1 | GLDC     | -0.231228334 | 9.71E-07    |
| RP11-476D10.1 | ZBTB16   | -0.193734362 | 4.38E-05    |
| RP11-476D10.1 | OMD      | -0.271539276 | 7.38E-09    |
| RP11-476D10.1 | HSD11B2  | -0.131949165 | 0.005625009 |
| RP11-476D10.1 | FGL2     | -0.197493404 | 3.08E-05    |
| RP11-476D10.1 | CLCNKA   | -0.206965484 | 1.23E-05    |
| RP11-476D10.1 | GATM     | -0.247976795 | 1.41E-07    |
| RP11-476D10.1 | TNS3     | -0.485999404 | 2.11E-27    |

|               |          |              |             |
|---------------|----------|--------------|-------------|
| RP11-476D10.1 | TOB1     | -0.35317608  | 2.42E-14    |
| RP11-476D10.1 | MARC2    | -0.262028311 | 2.52E-08    |
| RP11-476D10.1 | LRRC2    | -0.27724022  | 3.45E-09    |
| RP11-476D10.1 | SORD     | -0.499753908 | 4.09E-29    |
| RP11-476D10.1 | RIMS4    | -0.242428442 | 2.72E-07    |
| RP11-476D10.1 | SLC29A4  | -0.231137556 | 9.81E-07    |
| RP11-476D10.1 | SLC39A14 | -0.284643982 | 1.26E-09    |
| RP11-476D10.1 | FAXDC2   | -0.24310743  | 2.51E-07    |
| RP11-476D10.1 | HSPB8    | -0.428962299 | 4.45E-21    |
| RP11-476D10.1 | CCL19    | -0.105431265 | 0.027182175 |
| RP11-476D10.1 | KCNIP3   | -0.066436839 | 0.164658519 |
| RP11-476D10.1 | CGNL1    | -0.067773255 | 0.156310766 |
| RP11-476D10.1 | ATF3     | -0.133406003 | 0.005114675 |
| RP11-476D10.1 | SGCD     | -0.43750461  | 5.96E-22    |
| RP11-476D10.1 | STARD13  | -0.285385379 | 1.13E-09    |
| RP11-476D10.1 | LDHD     | -0.14492908  | 0.002334316 |
| RP11-476D10.1 | RCAN1    | -0.298190122 | 1.82E-10    |
| RP11-476D10.1 | ID3      | -0.392600636 | 1.25E-17    |
| RP11-476D10.1 | SYTL3    | -0.211813849 | 7.60E-06    |
| RP11-476D10.1 | MT1E     | -0.130924229 | 0.006011009 |
| RP11-476D10.1 | CAMK1D   | -0.11813523  | 0.013255519 |
| RP11-476D10.1 | PRKCQ    | -0.312527446 | 2.11E-11    |
| RP11-476D10.1 | NUAK2    | -0.466331877 | 4.36E-25    |
| RP11-476D10.1 | LIPG     | -0.035299708 | 0.460677176 |
| RP11-476D10.1 | SLC25A25 | -0.412066183 | 2.01E-19    |
| RP11-476D10.1 | PRKX     | -0.519513064 | 1.03E-31    |
| RP11-476D10.1 | SRPX     | -0.146590877 | 0.00207478  |
| RP11-476D10.1 | FAM189A1 | -0.155453462 | 0.001084207 |
| RP11-476D10.1 | PLEKHH1  | -0.195185243 | 3.83E-05    |
| RP11-476D10.1 | WNT11    | -0.31130663  | 2.55E-11    |
| RP11-476D10.1 | SNAI1    | -0.400514312 | 2.41E-18    |
| RP11-476D10.1 | FDCSP    | -0.07637979  | 0.110019214 |
| RP11-476D10.1 | MT1X     | -0.197591132 | 3.05E-05    |
| RP11-476D10.1 | ACACB    | -0.256129472 | 5.26E-08    |
| RP11-476D10.1 | ARC      | -0.004373067 | 0.927202461 |
| RP11-476D10.1 | KLK4     | -0.537051224 | 3.63E-34    |
| RP11-476D10.1 | ZFPM2    | -0.327978639 | 1.81E-12    |
| RP11-476D10.1 | AKAP12   | -0.306248333 | 5.51E-11    |
| RP11-476D10.1 | GJB6     | -0.394994099 | 7.64E-18    |
| RP11-476D10.1 | ERO1LB   | -0.207984029 | 1.12E-05    |
| RP11-476D10.1 | DNALI1   | -0.125779694 | 0.008331078 |
| RP11-476D10.1 | HKDC1    | -0.388095657 | 3.13E-17    |
| RP11-476D10.1 | ZFP36L2  | -0.381693569 | 1.13E-16    |
| RP11-476D10.1 | CAPSL    | -0.06200768  | 0.194717528 |
| RP11-476D10.1 | CYP7B1   | -0.294753908 | 3.00E-10    |
| RP11-476D10.1 | CPQ      | -0.132932683 | 0.005275711 |
| RP11-476D10.1 | RPS6KA6  | -0.307255266 | 4.73E-11    |
| RP11-476D10.1 | TLE1     | -0.466624067 | 4.04E-25    |
| RP11-476D10.1 | TP53INP2 | -0.169279737 | 0.000367432 |
| RP11-476D10.1 | KATNAL2  | -0.236608323 | 5.31E-07    |
| RP11-476D10.1 | SGPP2    | -0.435772035 | 9.00E-22    |

|               |          |              |             |
|---------------|----------|--------------|-------------|
| RP11-476D10.1 | CTH      | -0.357769567 | 1.06E-14    |
| RP11-476D10.1 | KIF12    | -0.385417861 | 5.37E-17    |
| RP11-476D10.1 | TMEM220  | -0.196405634 | 3.42E-05    |
| RP11-476D10.1 | CENPJ    | -0.237597657 | 4.75E-07    |
| RP11-476D10.1 | FAM155B  | 0.22571232   | 1.77E-06    |
| RP11-476D10.1 | WFS1     | -0.365834019 | 2.39E-15    |
| RP11-476D10.1 | SELENBP1 | -0.058148705 | 0.224020713 |
| RP11-476D10.1 | SNTA1    | -0.308490114 | 3.92E-11    |
| RP11-476D10.1 | FRAS1    | -0.621088054 | 3.47E-48    |
| RP11-476D10.1 | FBLN7    | -0.260240419 | 3.15E-08    |
| RP11-476D10.1 | AGPAT9   | -0.194095345 | 4.24E-05    |
| RP11-476D10.1 | GPR83    | -0.208897478 | 1.02E-05    |
| RP11-476D10.1 | PRTG     | -0.286841224 | 9.24E-10    |
| RP11-476D10.1 | EGR3     | -0.022423052 | 0.639402387 |
| RP11-476D10.1 | GRAMD2   | -0.485991461 | 2.11E-27    |
| RP11-476D10.1 | HYOU1    | -0.210155173 | 8.98E-06    |
| RP11-476D10.1 | FBLN5    | -0.193222178 | 4.59E-05    |
| RP11-476D10.1 | ITM2A    | -0.092731554 | 0.052187048 |
| RP11-476D10.1 | SRF      | -0.215632748 | 5.14E-06    |
| RP11-476D10.1 | FGFR2    | -0.423087288 | 1.71E-20    |
| RP11-476D10.1 | MT1A     | -0.184522219 | 0.000100829 |
| RP11-476D10.1 | MAMDC2   | -0.179889507 | 0.000151064 |
| RP11-476D10.1 | FHL2     | -0.385274886 | 5.53E-17    |
| RP11-476D10.1 | FTCDNL1  | -0.482133557 | 6.17E-27    |
| RP11-476D10.1 | PKIA     | -0.200545516 | 2.31E-05    |
| RP11-476D10.1 | DNAJB4   | -0.198874926 | 2.70E-05    |
| RP11-476D10.1 | SLC25A33 | -0.254152506 | 6.71E-08    |
| RP11-476D10.1 | EYA2     | -0.513701881 | 6.24E-31    |
| RP11-476D10.1 | LPAR1    | -0.501428187 | 2.50E-29    |
| RP11-476D10.1 | STX11    | -0.186890301 | 8.17E-05    |
| RP11-476D10.1 | ARHGEF28 | -0.35077629  | 3.72E-14    |
| RP11-476D10.1 | OR2W3    | -0.194340586 | 4.14E-05    |
| RP11-476D10.1 | ALDH1B1  | -0.413644096 | 1.42E-19    |
| RP11-476D10.1 | CXCL12   | -0.143665002 | 0.002551213 |
| RP11-476D10.1 | OLFM2    | -0.088805708 | 0.063019246 |
| RP11-476D10.1 | TUB      | -0.424703838 | 1.19E-20    |
| RP11-476D10.1 | HTRA3    | -0.245930612 | 1.80E-07    |
| RP11-476D10.1 | CKB      | -0.194619585 | 4.04E-05    |
| RP11-476D10.1 | RGS2     | -0.233686988 | 7.38E-07    |
| RP11-476D10.1 | SHANK2   | -0.206385351 | 1.31E-05    |
| RP11-476D10.1 | CNTFR    | 0.031212777  | 0.514223997 |
| RP11-476D10.1 | CYTH3    | -0.286648464 | 9.50E-10    |
| RP11-476D10.1 | PLAC9    | -0.073655925 | 0.123327326 |
| RP11-476D10.1 | WWOX     | -0.259708803 | 3.37E-08    |
| RP11-476D10.1 | NPR3     | -0.180857281 | 0.000138944 |
| RP11-476D10.1 | SDC2     | -0.249567956 | 1.17E-07    |
| RP11-476D10.1 | KLF15    | -0.151294006 | 0.001476602 |
| RP11-476D10.1 | TMEM164  | -0.386516553 | 4.31E-17    |
| RP11-476D10.1 | LONRF3   | -0.085701115 | 0.072841957 |
| RP11-476D10.1 | GBP1     | -0.099096763 | 0.037940306 |
| RP11-476D10.1 | ARHGAP6  | -0.403408556 | 1.31E-18    |

|               |          |              |             |
|---------------|----------|--------------|-------------|
| RP11-476D10.1 | TMEM119  | -0.163549687 | 0.000581354 |
| RP11-476D10.1 | SH3RF1   | -0.427618224 | 6.07E-21    |
| RP11-476D10.1 | CRELD2   | -0.160585515 | 0.000732841 |
| RP11-476D10.1 | PCP4     | -0.365202264 | 2.69E-15    |
| RP11-476D10.1 | GCSH     | -0.222021928 | 2.64E-06    |
| RP11-476D10.1 | IMPA2    | -0.316464356 | 1.15E-11    |
| RP11-476D10.1 | C1R      | -0.183165017 | 0.000113623 |
| RP11-476D10.1 | SUCNR1   | -0.120650478 | 0.011407915 |
| RP11-476D10.1 | SFRP1    | -0.154428669 | 0.00117077  |
| RP11-476D10.1 | UGT8     | -0.346786049 | 7.51E-14    |
| RP11-476D10.1 | TLE4     | -0.285355025 | 1.14E-09    |
| RP11-476D10.1 | ANTXR1   | -0.230511759 | 1.05E-06    |
| RP11-476D10.1 | GPX3     | -0.378077501 | 2.30E-16    |
| RP11-476D10.1 | DPY19L2  | -0.199729795 | 2.49E-05    |
| RP11-476D10.1 | FAM46C   | -0.233034524 | 7.94E-07    |
| RP11-476D10.1 | IL33     | -0.150383044 | 0.001578346 |
| RP11-476D10.1 | PEG3     | -0.276126209 | 4.01E-09    |
| RP11-476D10.1 | FAHD2A   | -0.350089643 | 4.20E-14    |
| RP11-476D10.1 | PTGDS    | -0.087561913 | 0.066814925 |
| RP11-476D10.1 | CHCHD10  | -0.295237582 | 2.80E-10    |
| RP11-476D10.1 | CD36     | -0.061659811 | 0.197238105 |
| RP11-476D10.1 | ANKRD37  | -0.168713654 | 0.000384723 |
| RP11-476D10.1 | TSPAN33  | -0.223506284 | 2.25E-06    |
| RP11-476D10.1 | PRDM16   | -0.290764659 | 5.32E-10    |
| RP11-476D10.1 | UST      | 0.066698675  | 0.162997175 |
| RP11-476D10.1 | NEXN     | -0.109685541 | 0.021530271 |
| RP11-476D10.1 | NUPR1L   | -0.14788919  | 0.001890674 |
| RP11-476D10.1 | SLC24A3  | -0.301141528 | 1.18E-10    |
| RP11-476D10.1 | MARC1    | -0.094649372 | 0.047488003 |
| RP11-476D10.1 | MYH11    | -0.100430342 | 0.035415896 |
| RP11-476D10.1 | APOA1    | -0.21555751  | 5.18E-06    |
| RP11-476D10.1 | TMEM178B | -0.062888571 | 0.188440267 |
| RP11-476D10.1 | CAPN6    | -0.173191805 | 0.000266339 |
| RP11-476D10.1 | PPM1L    | -0.123382741 | 0.009662493 |
| RP11-476D10.1 | FZD8     | -0.257105614 | 4.66E-08    |
| RP11-476D10.1 | RCAN2    | -0.056288758 | 0.239214981 |
| RP11-476D10.1 | COPZ2    | -0.31071232  | 2.79E-11    |
| RP11-476D10.1 | GAS1     | -0.266748177 | 1.38E-08    |
| RP11-476D10.1 | DACT1    | -0.244764971 | 2.07E-07    |
| RP11-476D10.1 | WBSCR17  | 0.007768858  | 0.87105859  |
| RP11-476D10.1 | NCS1     | -0.435507645 | 9.58E-22    |
| RP11-476D10.1 | SPIRE2   | -0.385610621 | 5.17E-17    |
| RP11-476D10.1 | C15orf52 | -0.304133925 | 7.57E-11    |
| RP11-476D10.1 | SPAG5    | -0.311729738 | 2.39E-11    |
| RP11-476D10.1 | ARL4D    | -0.213473802 | 6.42E-06    |
| RP11-476D10.1 | FAM189A2 | -0.169441718 | 0.000362619 |
| RP11-476D10.1 | MAP1LC3A | -0.163329976 | 0.000591498 |
| RP11-476D10.1 | KLF6     | -0.160230348 | 0.000753261 |
| RP11-476D10.1 | ADD3     | -0.227315395 | 1.49E-06    |
| RP11-476D10.1 | TSPAN7   | -0.078419052 | 0.100817184 |
| RP11-476D10.1 | KLF9     | -0.067243766 | 0.159579048 |

|               |          |              |             |
|---------------|----------|--------------|-------------|
| RP11-476D10.1 | KCNQ1    | -0.108912513 | 0.022474156 |
| RP11-476D10.1 | MAN1A1   | -0.205702675 | 1.40E-05    |
| RP11-476D10.1 | MLF1     | -0.348429264 | 5.63E-14    |
| RP11-476D10.1 | RARB     | -0.148278205 | 0.001838496 |
| RP11-476D10.1 | CDC42EP2 | -0.143779609 | 0.002530817 |
| RP11-476D10.1 | FAM3B    | -0.277648152 | 3.27E-09    |
| RP11-476D10.1 | GADD45B  | -0.107214689 | 0.024673838 |
| RP11-476D10.1 | TMEM47   | -0.041750021 | 0.382855742 |
| RP11-476D10.1 | SDF2L1   | -0.043600323 | 0.362107254 |
| RP11-476D10.1 | CCDC85A  | -0.359689371 | 7.45E-15    |
| RP11-476D10.1 | CRYBG3   | -0.391627472 | 1.53E-17    |
| RP11-476D10.1 | FBLN2    | -0.19065601  | 5.81E-05    |
| RP11-476D10.1 | PEBP4    | 0.049477745  | 0.300971719 |
| RP11-476D10.1 | CDADC1   | -0.158344019 | 0.000870822 |
| RP11-476D10.1 | FAM63A   | -0.191173442 | 5.55E-05    |
| RP11-476D10.1 | GLUL     | -0.245328218 | 1.94E-07    |
| RP11-476D10.1 | FREM2    | -0.224888939 | 1.94E-06    |
| RP11-476D10.1 | ACKR3    | -0.2489423   | 1.26E-07    |
| RP11-476D10.1 | DENND6A  | -0.286658535 | 9.48E-10    |
| RP11-476D10.1 | CLDN8    | -0.527075544 | 9.39E-33    |
| RP11-476D10.1 | UTS2R    | -0.267831274 | 1.20E-08    |
| RP11-476D10.1 | SCNN1B   | -0.362432697 | 4.49E-15    |
| RP11-476D10.1 | TTC30A   | -0.342099373 | 1.69E-13    |
| RP11-476D10.1 | CORO2B   | -0.040837707 | 0.393347971 |
| RP11-476D10.1 | TC2N     | -0.526037417 | 1.31E-32    |
| RP11-476D10.1 | ALDH2    | -0.1986972   | 2.75E-05    |
| RP11-476D10.1 | GPR183   | -0.058567984 | 0.220692677 |
| RP11-476D10.1 | C4orf47  | -0.199858444 | 2.46E-05    |
| RP11-476D10.1 | SLC25A42 | -0.047021077 | 0.325639024 |
| RP11-476D10.1 | LGMN     | -0.248128564 | 1.39E-07    |
| RP11-476D10.1 | ACSF2    | -0.318367706 | 8.49E-12    |
| RP11-476D10.1 | KIAA1467 | -0.340150634 | 2.37E-13    |
| RP11-476D10.1 | PRKG1    | -0.004518595 | 0.924786939 |
| RP11-476D10.1 | GNAI1    | -0.07641996  | 0.109831771 |
| RP11-476D10.1 | ABCC4    | -0.323043885 | 4.03E-12    |
| RP11-476D10.1 | PRPS1    | -0.302294261 | 9.95E-11    |
| RP11-476D10.1 | TSPAN5   | -0.562737511 | 4.96E-38    |
| RP11-476D10.1 | CR2      | 0.046568473  | 0.330322655 |
| RP11-476D10.1 | CCDC170  | -0.341663783 | 1.83E-13    |
| RP11-476D10.1 | RRAD     | -0.130720831 | 0.00609038  |
| RP11-476D10.1 | SCGB2A1  | -0.176310601 | 0.000205052 |
| RP11-476D10.1 | SESN3    | -0.295360415 | 2.75E-10    |
| RP11-476D10.1 | SGK223   | -0.378762588 | 2.01E-16    |
| RP11-476D10.1 | NDRG2    | -0.160537573 | 0.000735567 |
| RP11-476D10.1 | C3orf52  | -0.269131372 | 1.01E-08    |
| RP11-476D10.1 | FLRT3    | 0.334641145  | 6.01E-13    |
| RP11-476D10.1 | MST1R    | 0.16794247   | 0.000409501 |
| RP11-476D10.1 | SDC1     | 0.117836515  | 0.013491578 |
| RP11-476D10.1 | ST8SIA4  | 0.089642138  | 0.060568001 |
| RP11-476D10.1 | UBTD1    | 0.384263709  | 6.77E-17    |
| RP11-476D10.1 | EPHA2    | 0.164077047  | 0.000557659 |

|               |          |              |             |
|---------------|----------|--------------|-------------|
| RP11-476D10.1 | TMEM130  | 0.436188761  | 8.15E-22    |
| RP11-476D10.1 | SPINK2   | 0.350574594  | 3.85E-14    |
| RP11-476D10.1 | MMP16    | 0.173675357  | 0.00025583  |
| RP11-476D10.1 | SIGLEC15 | 0.336346345  | 4.52E-13    |
| RP11-476D10.1 | RIN1     | 0.385704519  | 5.07E-17    |
| RP11-476D10.1 | IL1RN    | -0.002464753 | 0.95893097  |
| RP11-476D10.1 | FCER1G   | 0.287110578  | 8.90E-10    |
| RP11-476D10.1 | CD276    | 0.222038382  | 2.63E-06    |
| RP11-476D10.1 | CTSB     | 0.261111742  | 2.83E-08    |
| RP11-476D10.1 | FAM171A2 | 0.489763978  | 7.29E-28    |
| RP11-476D10.1 | ASPHD1   | 0.300049786  | 1.39E-10    |
| RP11-476D10.1 | C15orf48 | 0.005307225  | 0.911709555 |
| RP11-476D10.1 | DYSF     | 0.473454512  | 6.58E-26    |
| RP11-476D10.1 | PDZRN4   | 0.395250348  | 7.25E-18    |
| RP11-476D10.1 | EFHD2    | 0.543193385  | 4.63E-35    |
| RP11-476D10.1 | ASF1B    | 0.237260929  | 4.93E-07    |
| RP11-476D10.1 | AQP1     | 0.484587671  | 3.12E-27    |
| RP11-476D10.1 | ARRDC2   | 0.303775212  | 7.98E-11    |
| RP11-476D10.1 | PRSS1    | 0.355943879  | 1.47E-14    |
| RP11-476D10.1 | MAPK13   | 0.463486852  | 9.18E-25    |
| RP11-476D10.1 | CST5     | 0.009141415  | 0.848532009 |
| RP11-476D10.1 | AHR      | 0.080889195  | 0.090501253 |
| RP11-476D10.1 | BAX      | 0.256742504  | 4.88E-08    |
| RP11-476D10.1 | C1orf115 | 0.419564835  | 3.80E-20    |
| RP11-476D10.1 | PLK3     | 0.314034637  | 1.67E-11    |
| RP11-476D10.1 | JAG2     | 0.472882897  | 7.67E-26    |
| RP11-476D10.1 | RAD23B   | 0.289745681  | 6.14E-10    |
| RP11-476D10.1 | CA12     | 0.464247823  | 7.53E-25    |
| RP11-476D10.1 | ADTRP    | 0.273539049  | 5.66E-09    |
| RP11-476D10.1 | UCP2     | 0.285669768  | 1.09E-09    |
| RP11-476D10.1 | IGFBP2   | 0.166065927  | 0.000476132 |
| RP11-476D10.1 | LOXL2    | 0.317606735  | 9.57E-12    |
| RP11-476D10.1 | GPX1     | 0.387372273  | 3.63E-17    |
| RP11-476D10.1 | P3H3     | 0.399273921  | 3.13E-18    |
| RP11-476D10.1 | C2orf81  | 0.432915237  | 1.77E-21    |
| RP11-476D10.1 | CDT1     | 0.212905166  | 6.80E-06    |
| RP11-476D10.1 | SNX25    | 0.555543814  | 6.48E-37    |
| RP11-476D10.1 | MTHFD1L  | 0.166918102  | 0.000444714 |
| RP11-476D10.1 | CDC42BPG | 0.145568216  | 0.002231179 |
| RP11-476D10.1 | MSN      | 0.272413974  | 6.57E-09    |
| RP11-476D10.1 | SIGLEC6  | 0.262791699  | 2.28E-08    |
| RP11-476D10.1 | F2R      | 0.224572353  | 2.01E-06    |
| RP11-476D10.1 | TMEM184A | 0.200847068  | 2.24E-05    |
| RP11-476D10.1 | CKS2     | 0.183075232  | 0.000114521 |
| RP11-476D10.1 | TAX1BP3  | 0.205133755  | 1.48E-05    |
| RP11-476D10.1 | PMEPA1   | 0.262371564  | 2.41E-08    |
| RP11-476D10.1 | CXCL16   | 0.190084111  | 6.12E-05    |
| RP11-476D10.1 | FAXC     | 0.204297892  | 1.60E-05    |
| RP11-476D10.1 | VTCN1    | -0.010415688 | 0.827727851 |
| RP11-476D10.1 | SH2D4A   | 0.345998411  | 8.62E-14    |
| RP11-476D10.1 | RNF24    | 0.271519248  | 7.39E-09    |

|               |          |             |             |
|---------------|----------|-------------|-------------|
| RP11-476D10.1 | LY6G6C   | 0.03763469  | 0.431536664 |
| RP11-476D10.1 | NID1     | 0.238510397 | 4.28E-07    |
| RP11-476D10.1 | STAC     | 0.056445775 | 0.237904958 |
| RP11-476D10.1 | RAB34    | 0.377198094 | 2.72E-16    |
| RP11-476D10.1 | HES4     | 0.256177272 | 5.23E-08    |
| RP11-476D10.1 | EPHA10   | 0.207111855 | 1.22E-05    |
| RP11-476D10.1 | ENTPD2   | 0.350061275 | 4.22E-14    |
| RP11-476D10.1 | DDB2     | 0.225863096 | 1.75E-06    |
| RP11-476D10.1 | NKAIN4   | 0.360141414 | 6.86E-15    |
| RP11-476D10.1 | TRIM29   | 0.025647783 | 0.592002253 |
| RP11-476D10.1 | ADCY8    | 0.237176966 | 4.98E-07    |
| RP11-476D10.1 | SFTA2    | 0.132611841 | 0.005387451 |
| RP11-476D10.1 | NRIP1    | 0.2038406   | 1.68E-05    |
| RP11-476D10.1 | VWA1     | 0.500018156 | 3.79E-29    |
| RP11-476D10.1 | APLNR    | 0.299621855 | 1.48E-10    |
| RP11-476D10.1 | REN      | 0.528955015 | 5.13E-33    |
| RP11-476D10.1 | EDIL3    | 0.410824232 | 2.64E-19    |
| RP11-476D10.1 | AGRN     | 0.240461689 | 3.42E-07    |
| RP11-476D10.1 | TREM1    | 0.433584012 | 1.51E-21    |
| RP11-476D10.1 | SRL      | 0.44806814  | 4.58E-23    |
| RP11-476D10.1 | RASGRF1  | 0.38797949  | 3.21E-17    |
| RP11-476D10.1 | RMI2     | 0.218726419 | 3.73E-06    |
| RP11-476D10.1 | SAMD1    | 0.305074324 | 6.57E-11    |
| RP11-476D10.1 | MGAT4B   | 0.15236972  | 0.001364228 |
| RP11-476D10.1 | NXN      | 0.127882613 | 0.007300373 |
| RP11-476D10.1 | SH3BGRL3 | 0.279279879 | 2.62E-09    |
| RP11-476D10.1 | CA11     | 0.531152592 | 2.52E-33    |
| RP11-476D10.1 | PLD3     | 0.671706193 | 6.56E-59    |
| RP11-476D10.1 | LURAP1L  | 0.113175513 | 0.017684642 |
| RP11-476D10.1 | CARNS1   | 0.350938839 | 3.61E-14    |
| RP11-476D10.1 | PDLIM7   | 0.422247738 | 2.08E-20    |
| RP11-476D10.1 | BCL2L1   | 0.159246688 | 0.000812597 |
| RP11-476D10.1 | GGT6     | 0.287507447 | 8.42E-10    |
| RP11-476D10.1 | DPYSL3   | 0.307032567 | 4.89E-11    |
| RP11-476D10.1 | FYN      | 0.327771836 | 1.87E-12    |
| RP11-476D10.1 | TK1      | 0.217088026 | 4.42E-06    |
| RP11-476D10.1 | AK1      | 0.609860713 | 4.56E-46    |
| RP11-476D10.1 | HIGD1B   | 0.598948824 | 4.36E-44    |
| RP11-476D10.1 | TMEM59L  | 0.081066778 | 0.089793491 |
| RP11-476D10.1 | MEGF9    | 0.210240277 | 8.90E-06    |
| RP11-476D10.1 | ZFP36L1  | 0.156760943 | 0.00098233  |
| RP11-476D10.1 | ADRA1B   | 0.450109784 | 2.76E-23    |
| RP11-476D10.1 | EPHA4    | 0.143978185 | 0.002495828 |
| RP11-476D10.1 | TCERG1L  | 0.32864018  | 1.63E-12    |
| RP11-476D10.1 | NGFR     | 0.234075771 | 7.07E-07    |
| RP11-476D10.1 | EBI3     | 0.152543048 | 0.001346874 |
| RP11-476D10.1 | S100A10  | 0.054225838 | 0.256898397 |
| RP11-476D10.1 | S100B    | 0.165155031 | 0.000511989 |
| RP11-476D10.1 | CD44     | 0.637661059 | 1.78E-51    |
| RP11-476D10.1 | BHLHE41  | 0.12648322  | 0.007972658 |
| RP11-476D10.1 | FBXO2    | 0.40895393  | 3.96E-19    |

|               |          |              |             |
|---------------|----------|--------------|-------------|
| RP11-476D10.1 | SLC30A2  | -0.105629911 | 0.026892341 |
| RP11-476D10.1 | FRMD5    | 0.105155173  | 0.027589467 |
| RP11-476D10.1 | SAMD11   | 0.10314218   | 0.03072063  |
| RP11-476D10.1 | SIPAIL2  | 0.343725001  | 1.28E-13    |
| RP11-476D10.1 | S100A16  | 0.108324587  | 0.023215832 |
| RP11-476D10.1 | PPL      | -0.046046921 | 0.335773379 |
| RP11-476D10.1 | ARHGDIB  | 0.486887464  | 1.64E-27    |
| RP11-476D10.1 | CDC42EP3 | 0.108359196  | 0.023171593 |
| RP11-476D10.1 | RUNX2    | 0.399323424  | 3.10E-18    |
| RP11-476D10.1 | LAMC2    | 0.021211171  | 0.657616626 |
| RP11-476D10.1 | BRINP1   | 0.277481915  | 3.34E-09    |
| RP11-476D10.1 | GPRC5B   | 0.234265127  | 6.92E-07    |
| RP11-476D10.1 | AQP5     | 0.380995575  | 1.29E-16    |
| RP11-476D10.1 | PLAG1    | 0.465237866  | 5.81E-25    |
| RP11-476D10.1 | PTPRU    | -0.02003163  | 0.675541657 |
| RP11-476D10.1 | ANGPTL4  | 0.166141812  | 0.000473253 |
| RP11-476D10.1 | PALM3    | 0.127689711  | 0.007389927 |
| RP11-476D10.1 | ACP5     | 0.234396897  | 6.82E-07    |
| RP11-476D10.1 | DLG4     | 0.633602167  | 1.19E-50    |
| RP11-476D10.1 | ETNK2    | 0.415063403  | 1.04E-19    |
| RP11-476D10.1 | CD109    | 0.25367791   | 7.11E-08    |
| RP11-476D10.1 | SNX22    | 0.401696973  | 1.88E-18    |
| RP11-476D10.1 | TMEM98   | 0.110639698  | 0.020412804 |
| RP11-476D10.1 | CTHRC1   | 0.041333154  | 0.387628627 |
| RP11-476D10.1 | S100A2   | 0.023731809  | 0.61997288  |
| RP11-476D10.1 | C11orf80 | 0.205209781  | 1.47E-05    |
| RP11-476D10.1 | SREBF1   | 0.382330998  | 9.94E-17    |
| RP11-476D10.1 | PRSS22   | 0.114758163  | 0.016148264 |
| RP11-476D10.1 | CMTM3    | 0.256189895  | 5.22E-08    |
| RP11-476D10.1 | RDH5     | 0.356901648  | 1.24E-14    |
| RP11-476D10.1 | MYH10    | 0.347880486  | 6.20E-14    |
| RP11-476D10.1 | EVPL     | 0.222900485  | 2.40E-06    |
| RP11-476D10.1 | SCD      | 0.187060083  | 8.05E-05    |
| RP11-476D10.1 | CD151    | 0.357337381  | 1.14E-14    |
| RP11-476D10.1 | S100A4   | 0.245482681  | 1.90E-07    |
| RP11-476D10.1 | BNIP1    | 0.360297155  | 6.66E-15    |
| RP11-476D10.1 | MAP3K6   | 0.354530368  | 1.90E-14    |
| RP11-476D10.1 | MANEAL   | 0.370109217  | 1.07E-15    |
| RP11-476D10.1 | CD207    | 0.228523325  | 1.31E-06    |
| RP11-476D10.1 | CD1A     | 0.244426761  | 2.15E-07    |
| RP11-476D10.1 | C3       | 0.128452526  | 0.007041433 |
| RP11-476D10.1 | NT5E     | 0.157089444  | 0.000958162 |
| RP11-476D10.1 | CACNG4   | 0.043452841  | 0.363734844 |
| RP11-476D10.1 | FHOD1    | 0.363706136  | 3.55E-15    |
| RP11-476D10.1 | LEMD1    | 0.216169329  | 4.87E-06    |
| RP11-476D10.1 | ATP11A   | 0.566793424  | 1.13E-38    |
| RP11-476D10.1 | PPAP2C   | 0.267158379  | 1.31E-08    |
| RP11-476D10.1 | DRAM1    | 0.158802445  | 0.000840787 |
| RP11-476D10.1 | CDA      | 0.46494681   | 6.27E-25    |
| RP11-476D10.1 | CCND2    | 0.548686279  | 7.09E-36    |
| RP11-476D10.1 | LCN6     | 0.310131213  | 3.05E-11    |



|               |          |             |             |
|---------------|----------|-------------|-------------|
| RP11-476D10.1 | CDH4     | 0.20553346  | 1.42E-05    |
| RP11-476D10.1 | MMP11    | 0.236285637 | 5.51E-07    |
| RP11-476D10.1 | B3GAT1   | 0.170775865 | 0.000325154 |
| RP11-476D10.1 | SPP1     | 0.176283226 | 0.000205527 |
| RP11-476D10.1 | HLA-DQB1 | 0.12239823  | 0.010261991 |
| RP11-476D10.1 | SDC3     | 0.347998497 | 6.07E-14    |
| RP11-476D10.1 | CX3CL1   | 0.274345834 | 5.09E-09    |
| RP11-476D10.1 | SDK1     | 0.27229029  | 6.68E-09    |
| RP11-476D10.1 | DOCK9    | 0.255558708 | 5.64E-08    |
| RP11-476D10.1 | CSF2     | 0.333247141 | 7.59E-13    |
| RP11-476D10.1 | GRHL3    | 0.259435903 | 3.49E-08    |
| RP11-476D10.1 | TMEM92   | 0.204037846 | 1.65E-05    |
| RP11-476D10.1 | BASP1    | 0.140238291 | 0.003234718 |
| RP11-476D10.1 | HRH1     | 0.13697654  | 0.004035683 |
| RP11-476D10.1 | ESM1     | 0.308178633 | 4.11E-11    |
| RP11-476D10.1 | B4GALNT3 | 0.024986809 | 0.601586322 |
| RP11-476D10.1 | LMO3     | 0.553854075 | 1.17E-36    |
| RP11-476D10.1 | C9orf16  | 0.21024978  | 8.90E-06    |
| RP11-476D10.1 | SEMA3F   | 0.466158691 | 4.57E-25    |
| RP11-476D10.1 | PLA2G12B | 0.688868242 | 4.79E-63    |
| RP11-476D10.1 | KLK6     | 0.147932726 | 0.001884768 |
| RP11-476D10.1 | ST3GAL5  | 0.634110947 | 9.37E-51    |
| RP11-476D10.1 | FAM132B  | 0.400913733 | 2.22E-18    |
| RP11-476D10.1 | CDKN1A   | 0.119553913 | 0.012183389 |
| RP11-476D10.1 | E2F1     | 0.215387649 | 5.27E-06    |
| RP11-476D10.1 | B3GNT8   | 0.463510822 | 9.12E-25    |
| RP11-476D10.1 | MTMR11   | 0.328928399 | 1.55E-12    |
| RP11-476D10.1 | MYO1G    | 0.17695186  | 0.000194211 |
| RP11-476D10.1 | TMSB10   | 0.250325665 | 1.07E-07    |
| RP11-476D10.1 | UNC5CL   | 0.210461405 | 8.71E-06    |
| RP11-476D10.1 | ABR      | 0.324107685 | 3.40E-12    |
| RP11-476D10.1 | PLP2     | 0.340524808 | 2.22E-13    |
| RP11-476D10.1 | SRCIN1   | 0.377950129 | 2.35E-16    |
| RP11-476D10.1 | PDE9A    | 0.205196165 | 1.47E-05    |
| RP11-476D10.1 | TREM2    | 0.293275794 | 3.71E-10    |
| RP11-476D10.1 | KDEL3    | 0.418837622 | 4.48E-20    |
| RP11-476D10.1 | PC       | 0.233456214 | 7.57E-07    |
| RP11-476D10.1 | C2CD4A   | 0.024422711 | 0.609820425 |
| RP11-476D10.1 | PELI1    | 0.219836175 | 3.32E-06    |
| RP11-476D10.1 | SSX1     | 0.267525035 | 1.25E-08    |
| RP11-476D10.1 | MROH6    | 0.330956285 | 1.11E-12    |
| RP11-476D10.1 | ESPN     | 0.427596948 | 6.10E-21    |
| RP11-476D10.1 | BMP1     | 0.532495816 | 1.62E-33    |
| RP11-476D10.1 | TM4SF4   | 0.285103462 | 1.18E-09    |
| RP11-476D10.1 | CORO2A   | 0.351604635 | 3.21E-14    |
| RP11-476D10.1 | CD164L2  | 0.362883619 | 4.13E-15    |
| RP11-476D10.1 | CTSS     | 0.235707072 | 5.88E-07    |
| RP11-476D10.1 | CLU      | 0.195348643 | 3.77E-05    |
| RP11-476D10.1 | TMSB4X   | 0.322879493 | 4.14E-12    |
| RP11-476D10.1 | WNT10A   | 0.089784406 | 0.060159009 |
| RP11-476D10.1 | NAPSA    | 0.36374344  | 3.52E-15    |

|               |          |              |             |
|---------------|----------|--------------|-------------|
| RP11-476D10.1 | PLEKHA4  | 0.267665882  | 1.22E-08    |
| RP11-476D10.1 | SFTPA1   | 0.551479359  | 2.69E-36    |
| RP11-476D10.1 | C1orf116 | 0.2445637    | 2.12E-07    |
| RP11-476D10.1 | TM4SF1   | 0.07453902   | 0.118882054 |
| RP11-476D10.1 | SEL1L3   | 0.059474341  | 0.213619529 |
| RP11-476D10.1 | VASN     | 0.242067317  | 2.84E-07    |
| RP11-476D10.1 | NPTXR    | 0.196397265  | 3.42E-05    |
| RP11-476D10.1 | PDE4C    | 0.230761822  | 1.02E-06    |
| RP11-476D10.1 | CDC42EP1 | 0.211551729  | 7.80E-06    |
| RP11-476D10.1 | ENDOD1   | 0.217616947  | 4.19E-06    |
| RP11-476D10.1 | RYR1     | 0.452306743  | 1.59E-23    |
| RP11-476D10.1 | IL1RAP   | 0.29307509   | 3.82E-10    |
| RP11-476D10.1 | SLC35F2  | 0.188542459  | 7.04E-05    |
| RP11-476D10.1 | ISYNA1   | 0.537142351  | 3.52E-34    |
| RP11-476D10.1 | HLA-G    | 0.021707611  | 0.65012996  |
| RP11-476D10.1 | CDKN2B   | 0.135564239  | 0.00443509  |
| RP11-476D10.1 | ALDH1A3  | 0.129532496  | 0.006573192 |
| RP11-476D10.1 | CLIP3    | 0.363060764  | 4.00E-15    |
| RP11-476D10.1 | ULBP2    | 0.359397889  | 7.86E-15    |
| RP11-476D10.1 | ETHE1    | 0.134901847  | 0.00463444  |
| RP11-476D10.1 | XPR1     | 0.318632379  | 8.14E-12    |
| RP11-476D10.1 | SPTBN2   | 0.114747383  | 0.01615832  |
| RP11-476D10.1 | IVL      | 0.31297893   | 1.97E-11    |
| RP11-476D10.1 | MARCO    | 0.14045403   | 0.003187214 |
| RP11-476D10.1 | PLXND1   | 0.46648932   | 4.19E-25    |
| RP11-476D10.1 | EMILIN2  | 0.458897904  | 3.00E-24    |
| RP11-476D10.1 | PLAUR    | 0.193745851  | 4.38E-05    |
| RP11-476D10.1 | CDC42EP5 | 0.204458597  | 1.58E-05    |
| RP11-476D10.1 | TRPC5    | 0.569729939  | 3.84E-39    |
| RP11-476D10.1 | TMEM100  | 0.339874755  | 2.48E-13    |
| RP11-476D10.1 | QSOX1    | 0.229074069  | 1.23E-06    |
| RP11-476D10.1 | ARHGAP23 | 0.306259964  | 5.50E-11    |
| RP11-476D10.1 | MDF1     | 0.308953789  | 3.66E-11    |
| RP11-476D10.1 | FSTL3    | 0.03936172   | 0.410685944 |
| RP11-476D10.1 | INF2     | 0.341833991  | 1.77E-13    |
| RP11-476D10.1 | TGFBR1   | 0.256865621  | 4.80E-08    |
| RP11-476D10.1 | TGFBI    | 0.256664492  | 4.92E-08    |
| RP11-476D10.1 | ERBB3    | 0.048674364  | 0.308898178 |
| RP11-476D10.1 | CCL18    | 0.152155542  | 0.001385955 |
| RP11-476D10.1 | CCL17    | 0.157063068  | 0.000960082 |
| RP11-476D10.1 | C16orf45 | 0.37650861   | 3.12E-16    |
| RP11-476D10.1 | PRDM1    | 0.480498284  | 9.69E-27    |
| RP11-476D10.1 | TRIM47   | 0.19985121   | 2.46E-05    |
| RP11-476D10.1 | CNFN     | 0.206424215  | 1.30E-05    |
| RP11-476D10.1 | ARMCX3   | 0.35498766   | 1.75E-14    |
| RP11-476D10.1 | RAMP1    | 0.311183087  | 2.60E-11    |
| RP11-476D10.1 | GABRD    | 0.486589459  | 1.78E-27    |
| RP11-476D10.1 | COL13A1  | 0.671538254  | 7.18E-59    |
| RP11-476D10.1 | S100A5   | 0.303977192  | 7.75E-11    |
| RP11-476D10.1 | MISP     | -0.025260276 | 0.597612606 |
| RP11-476D10.1 | HES6     | 0.470799977  | 1.34E-25    |

|               |           |             |             |
|---------------|-----------|-------------|-------------|
| RP11-476D10.1 | PSD3      | 0.412312984 | 1.90E-19    |
| RP11-476D10.1 | DOK7      | 0.1069642   | 0.025013615 |
| RP11-476D10.1 | ZMAT3     | 0.218417917 | 3.85E-06    |
| RP11-476D10.1 | MFAP2     | 0.28436867  | 1.30E-09    |
| RP11-476D10.1 | TMEM79    | 0.335702817 | 5.03E-13    |
| RP11-476D10.1 | SLC1A5    | 0.245868202 | 1.82E-07    |
| RP11-476D10.1 | BBC3      | 0.258735781 | 3.81E-08    |
| RP11-476D10.1 | HLA-DQB2  | 0.160254886 | 0.000751833 |
| RP11-476D10.1 | C1QL1     | 0.267232845 | 1.29E-08    |
| RP11-476D10.1 | TMEM215   | 0.549365833 | 5.60E-36    |
| RP11-476D10.1 | PNP       | 0.183678761 | 0.000108611 |
| RP11-476D10.1 | ARNTL     | 0.190132479 | 6.10E-05    |
| RP11-476D10.1 | CLDN2     | 0.441666777 | 2.19E-22    |
| RP11-476D10.1 | MVP       | 0.297933392 | 1.89E-10    |
| RP11-476D10.1 | LGALS1    | 0.268920173 | 1.04E-08    |
| RP11-476D10.1 | BIRC7     | 0.344691884 | 1.08E-13    |
| RP11-476D10.1 | COL8A1    | 0.333817764 | 6.90E-13    |
| RP11-476D10.1 | PERP      | 0.037909988 | 0.428172559 |
| RP11-476D10.1 | GJA4      | 0.436141386 | 8.24E-22    |
| RP11-476D10.1 | IGFL2     | 0.26954455  | 9.58E-09    |
| RP11-476D10.1 | DAPK2     | 0.228112678 | 1.37E-06    |
| RP11-476D10.1 | MAMLD1    | 0.288605146 | 7.22E-10    |
| RP11-476D10.1 | ETV5      | 0.669154918 | 2.56E-58    |
| RP11-476D10.1 | RUNX1     | 0.096287623 | 0.043759734 |
| RP11-476D10.1 | LONRF2    | 0.385286375 | 5.52E-17    |
| RP11-476D10.1 | SPOCK1    | 0.426329466 | 8.17E-21    |
| RP11-476D10.1 | XKRX      | 0.443873649 | 1.28E-22    |
| RP11-476D10.1 | TGFB1     | 0.497487022 | 7.93E-29    |
| RP11-476D10.1 | ERP27     | 0.148775212 | 0.001773752 |
| RP11-476D10.1 | TNFRSF10C | 0.331224079 | 1.06E-12    |
| RP11-476D10.1 | PALM      | 0.134772063 | 0.004674434 |
| RP11-476D10.1 | TSC22D1   | 0.468546708 | 2.43E-25    |
| RP11-476D10.1 | TGM2      | 0.103758049 | 0.029731872 |
| RP11-476D10.1 | UBE2QL1   | 0.555331338 | 6.98E-37    |
| RP11-476D10.1 | ECE1      | 0.391720093 | 1.50E-17    |
| RP11-476D10.1 | COL8A2    | 0.190463817 | 5.92E-05    |
| RP11-476D10.1 | HIST3H2A  | 0.127466029 | 0.007495    |
| RP11-476D10.1 | TNFRSF21  | 0.126189612 | 0.008120533 |
| RP11-476D10.1 | SOX4      | 0.077058665 | 0.106885101 |
| RP11-476D10.1 | ELF3      | 0.002997362 | 0.950066882 |
| RP11-476D10.1 | TPD52L1   | 0.252026467 | 8.69E-08    |
| RP11-476D10.1 | INHBB     | 0.301815126 | 1.07E-10    |
| RP11-476D10.1 | HPN       | 0.387039233 | 3.88E-17    |
| RP11-476D10.1 | MMP7      | 0.042266544 | 0.376991891 |
| RP11-476D10.1 | RAB27A    | 0.41252773  | 1.82E-19    |
| RP11-476D10.1 | IGF2BP2   | 0.391101245 | 1.70E-17    |
| RP11-476D10.1 | ITGB4     | 0.229528808 | 1.17E-06    |
| RP11-476D10.1 | PPP1R1B   | 0.392434115 | 1.30E-17    |
| RP11-476D10.1 | NPDC1     | 0.531322799 | 2.38E-33    |
| RP11-476D10.1 | CCL13     | 0.218557423 | 3.80E-06    |
| RP11-476D10.1 | SPINT1    | 0.193465859 | 4.49E-05    |

|               |            |              |             |
|---------------|------------|--------------|-------------|
| RP11-476D10.1 | HEY2       | 0.644063431  | 8.40E-53    |
| RP11-476D10.1 | CST2       | -0.010862374 | 0.82046276  |
| RP11-476D10.1 | ADM        | 0.478410967  | 1.72E-26    |
| RP11-476D10.1 | VSTM2L     | 0.146098834  | 0.002148734 |
| RP11-476D10.1 | FAM84A     | 0.297686449  | 1.96E-10    |
| RP11-476D10.1 | P4HA2      | 0.474629514  | 4.79E-26    |
| RP11-476D10.1 | LPL        | 0.48172832   | 6.91E-27    |
| RP11-476D10.1 | TMEM173    | 0.514034354  | 5.63E-31    |
| RP11-476D10.1 | DHRS3      | 0.370617855  | 9.67E-16    |
| RP11-476D10.1 | SCN1B      | 0.404459874  | 1.04E-18    |
| RP11-476D10.1 | GLT1D1     | 0.619571218  | 6.78E-48    |
| RP11-476D10.1 | PHYHIP     | 0.44678463   | 6.28E-23    |
| RP11-476D10.1 | BHLHE40    | 0.231854841  | 9.06E-07    |
| RP11-476D10.1 | BID        | 0.303158634  | 8.75E-11    |
| RP11-476D10.1 | POSTN      | 0.070732178  | 0.138971464 |
| RP11-476D10.1 | ITGA3      | 0.146760659  | 0.002049807 |
| RP11-476D10.1 | RSP04      | 0.163283737  | 0.000593654 |
| RP11-476D10.1 | ADAMTS9    | 0.71312828   | 2.07E-69    |
| RP11-476D10.1 | ABTB2      | 0.139242858  | 0.00346234  |
| RP11-476D10.1 | KCNQ3      | 0.145910187  | 0.002177721 |
| RP11-476D10.1 | ANXA1      | 0.295887918  | 2.55E-10    |
| RP11-476D10.1 | S100A11    | 0.290733596  | 5.34E-10    |
| RP11-476D10.1 | CEACAM6    | 0.10781584   | 0.02387462  |
| RP11-476D10.1 | IER5L      | 0.253377209  | 7.38E-08    |
| RP11-476D10.1 | KRT80      | 0.015817849  | 0.741024834 |
| RP11-476D10.1 | CDH6       | 0.198233667  | 2.87E-05    |
| RP11-476D10.1 | UNC5B      | 0.260493178  | 3.05E-08    |
| RP11-476D10.1 | PLEKHN1    | 0.283274233  | 1.52E-09    |
| RP11-476D10.1 | SYTL1      | 0.428017787  | 5.53E-21    |
| RP11-476D10.1 | TMEM163    | 0.190954016  | 5.66E-05    |
| RP11-476D10.1 | C4orf48    | 0.442787155  | 1.67E-22    |
| RP11-476D10.1 | B3GNT7     | 0.561669173  | 7.29E-38    |
| RP11-476D10.1 | BAIAP3     | 0.338664435  | 3.05E-13    |
| RP11-476D10.1 | PHLDA2     | 0.352513404  | 2.73E-14    |
| RP11-476D10.1 | GAP43      | 0.204920682  | 1.51E-05    |
| RP11-476D10.1 | S100A1     | 0.246816261  | 1.62E-07    |
| RP11-476D10.1 | PTPRE      | 0.244135911  | 2.23E-07    |
| RP11-476D10.1 | CCND1      | 0.357076253  | 1.20E-14    |
| RP11-476D10.1 | ST6GALNAC5 | 0.000951747  | 0.984135543 |
| RP11-476D10.1 | KRT17      | 0.252407733  | 8.30E-08    |
| RP11-476D10.1 | HPCAL4     | 0.56766191   | 8.23E-39    |
| RP11-476D10.1 | GABBR2     | 0.49107458   | 5.02E-28    |
| RP11-476D10.1 | DIRAS3     | 0.500778985  | 3.03E-29    |
| RP11-476D10.1 | SERINC2    | 0.317025758  | 1.05E-11    |
| RP11-476D10.1 | PTCHD4     | 0.322217809  | 4.60E-12    |
| RP11-476D10.1 | EPS8       | 0.446340671  | 7.01E-23    |
| RP11-476D10.1 | LY6E       | 0.238623585  | 4.22E-07    |
| RP11-476D10.1 | UPP1       | 0.193131542  | 4.63E-05    |
| RP11-476D10.1 | AHNAK2     | 0.111071601  | 0.019923783 |
| RP11-476D10.1 | PLXNC1     | 0.418431534  | 4.91E-20    |
| RP11-476D10.1 | TNC        | 0.083125301  | 0.081909125 |

|               |         |             |             |
|---------------|---------|-------------|-------------|
| RP11-476D10.1 | DUSP4   | 0.507233554 | 4.45E-30    |
| RP11-476D10.1 | NRCAM   | 0.327209157 | 2.05E-12    |
| RP11-476D10.1 | NRP2    | 0.518281751 | 1.51E-31    |
| RP11-476D10.1 | CTSC    | 0.372610422 | 6.61E-16    |
| RP11-476D10.1 | AMIG02  | 0.487796942 | 1.27E-27    |
| RP11-476D10.1 | NAB2    | 0.393888826 | 9.60E-18    |
| RP11-476D10.1 | TBC1D2  | 0.100046098 | 0.03612817  |
| RP11-476D10.1 | PHLDA3  | 0.250088792 | 1.10E-07    |
| RP11-476D10.1 | PTP4A3  | 0.403278063 | 1.34E-18    |
| RP11-476D10.1 | CRABP2  | 0.456005645 | 6.27E-24    |
| RP11-476D10.1 | GOS2    | 0.411282375 | 2.39E-19    |
| RP11-476D10.1 | S100A6  | 0.172682903 | 0.000277833 |
| RP11-476D10.1 | FOXQ1   | 0.158866983 | 0.000836636 |
| RP11-476D10.1 | LRG1    | 0.333843012 | 6.87E-13    |
| RP11-476D10.1 | LAMP5   | 0.197977646 | 2.94E-05    |
| RP11-476D10.1 | ALDH3B1 | 0.15839267  | 0.000867588 |
| RP11-476D10.1 | CDH2    | 0.450384812 | 2.58E-23    |
| RP11-476D10.1 | SCG5    | 0.554459874 | 9.49E-37    |
| RP11-476D10.1 | ZCCHC16 | 0.615245396 | 4.50E-47    |
| RP11-476D10.1 | GRB7    | 0.166978242 | 0.000442571 |
| RP11-476D10.1 | TIAM1   | 0.332357806 | 8.80E-13    |
| RP11-476D10.1 | FXYD5   | 0.548477916 | 7.61E-36    |
| RP11-476D10.1 | CLDN9   | 0.181015432 | 0.000137052 |
| RP11-476D10.1 | FAM43A  | 0.261277694 | 2.77E-08    |
| RP11-476D10.1 | CHST2   | 0.358557771 | 9.16E-15    |
| RP11-476D10.1 | HMGA2   | 0.553880883 | 1.16E-36    |
| RP11-476D10.1 | GALNT7  | 0.468957193 | 2.18E-25    |
| RP11-476D10.1 | CBLN1   | 0.228027857 | 1.38E-06    |
| RP11-476D10.1 | STRA6   | 0.286038836 | 1.03E-09    |
| RP11-476D10.1 | MUC21   | 0.304845507 | 6.80E-11    |
| RP11-476D10.1 | PRR36   | 0.403471958 | 1.29E-18    |
| RP11-476D10.1 | NFE2L3  | 0.214354628 | 5.87E-06    |
| RP11-476D10.1 | NR1D1   | 0.219542424 | 3.42E-06    |
| RP11-476D10.1 | MUC1    | 0.012180647 | 0.799113395 |
| RP11-476D10.1 | NAT8L   | 0.602833679 | 8.77E-45    |
| RP11-476D10.1 | APOC1   | 0.456637826 | 5.34E-24    |
| RP11-476D10.1 | EVA1A   | 0.09819764  | 0.039727058 |
| RP11-476D10.1 | ENTPD1  | 0.504640294 | 9.66E-30    |
| RP11-476D10.1 | COL1A1  | 0.18645386  | 8.49E-05    |
| RP11-476D10.1 | FNDC4   | 0.351707753 | 3.15E-14    |
| RP11-476D10.1 | FRMD3   | 0.662838643 | 7.03E-57    |
| RP11-476D10.1 | SHROOM4 | 0.415302403 | 9.85E-20    |
| RP11-476D10.1 | NELL2   | 0.435053757 | 1.07E-21    |
| RP11-476D10.1 | EPHB3   | 0.265793027 | 1.56E-08    |
| RP11-476D10.1 | TMC6    | 0.347151003 | 7.05E-14    |
| RP11-476D10.1 | NOD1    | 0.359034779 | 8.40E-15    |
| RP11-476D10.1 | GGCT    | 0.298771808 | 1.67E-10    |
| RP11-476D10.1 | ICAM1   | 0.291096139 | 5.07E-10    |
| RP11-476D10.1 | PRSS23  | 0.429268673 | 4.14E-21    |
| RP11-476D10.1 | CFI     | 0.359076622 | 8.33E-15    |
| RP11-476D10.1 | CD55    | 0.095291765 | 0.045995509 |

|               |           |             |             |
|---------------|-----------|-------------|-------------|
| RP11-476D10.1 | RASD2     | 0.26263879  | 2.33E-08    |
| RP11-476D10.1 | KLK11     | 0.260867598 | 2.91E-08    |
| RP11-476D10.1 | ICAM5     | 0.385279708 | 5.52E-17    |
| RP11-476D10.1 | ADORA1    | 0.38713767  | 3.80E-17    |
| RP11-476D10.1 | ITGA2     | 0.134250234 | 0.0048384   |
| RP11-476D10.1 | ABCC3     | 0.38455519  | 6.38E-17    |
| RP11-476D10.1 | MFGE8     | 0.302411988 | 9.78E-11    |
| RP11-476D10.1 | STK32A    | 0.498515787 | 5.88E-29    |
| RP11-476D10.1 | CYSLTR2   | 0.415049928 | 1.04E-19    |
| RP11-476D10.1 | LAD1      | 0.225712746 | 1.77E-06    |
| RP11-476D10.1 | MGAT3     | 0.000944796 | 0.98425139  |
| RP11-476D10.1 | IGFBP6    | 0.448471816 | 4.14E-23    |
| RP11-476D10.1 | CYP2S1    | 0.07075005  | 0.138871415 |
| RP11-476D10.1 | KCNJ2     | 0.557729143 | 2.99E-37    |
| RP11-476D10.1 | FAM20A    | 0.437065048 | 6.62E-22    |
| RP11-476D10.1 | TGFA      | 0.577302346 | 2.24E-40    |
| RP11-476D10.1 | MXRA8     | 0.23153868  | 9.38E-07    |
| RP11-476D10.1 | C8orf4    | 0.31673527  | 1.10E-11    |
| RP11-476D10.1 | CLDN10    | 0.261726283 | 2.61E-08    |
| RP11-476D10.1 | PDE5A     | 0.322627443 | 4.31E-12    |
| RP11-476D10.1 | APOE      | 0.483933931 | 3.75E-27    |
| RP11-476D10.1 | SPOCK2    | 0.034849933 | 0.46641368  |
| RP11-476D10.1 | TENM1     | 0.773604437 | 1.28E-88    |
| RP11-476D10.1 | SLIT1     | 0.765586792 | 9.62E-86    |
| RP11-476D10.1 | CXCL14    | 0.211812573 | 7.60E-06    |
| RP11-476D10.1 | ECM1      | 0.744809651 | 8.52E-79    |
| RP11-476D10.1 | DUSP5     | 0.144645542 | 0.002381448 |
| RP11-476D10.1 | SEZ6L2    | 0.367301211 | 1.81E-15    |
| RP11-476D10.1 | THRSP     | 0.526940796 | 9.80E-33    |
| RP11-476D10.1 | C19orf33  | 0.070658421 | 0.13938495  |
| RP11-476D10.1 | MPZL2     | 0.433569686 | 1.51E-21    |
| RP11-476D10.1 | CTSH      | 0.34680236  | 7.49E-14    |
| RP11-476D10.1 | CYP1B1    | 0.272066183 | 6.88E-09    |
| RP11-476D10.1 | ALOX5     | 0.09257553  | 0.052585818 |
| RP11-476D10.1 | SYTL5     | 0.333748771 | 6.98E-13    |
| RP11-476D10.1 | TNFRSF12A | 0.255432754 | 5.73E-08    |
| RP11-476D10.1 | DUSP6     | 0.359287254 | 8.02E-15    |
| RP11-476D10.1 | ALOX15B   | 0.211615983 | 7.75E-06    |
| RP11-476D10.1 | SDC4      | 0.364723838 | 2.94E-15    |
| RP11-476D10.1 | MDK       | 0.368591246 | 1.42E-15    |
| RP11-476D10.1 | KRT19     | 0.048584721 | 0.30979108  |
| RP11-476D10.1 | MET       | 0.250105671 | 1.10E-07    |
| RP11-476D10.1 | TESC      | 0.634088395 | 9.47E-51    |
| RP11-476D10.1 | CXCL17    | 0.108064669 | 0.023550414 |
| RP11-476D10.1 | NPC2      | 0.539866529 | 1.42E-34    |
| RP11-476D10.1 | COMP      | 0.219721568 | 3.36E-06    |
| RP11-476D10.1 | TUSC3     | 0.422446456 | 1.98E-20    |
| RP11-476D10.1 | TMPRSS4   | 0.157266177 | 0.000945387 |
| RP11-476D10.1 | LGALS3    | 0.232023772 | 8.89E-07    |
| RP11-476D10.1 | CRLF1     | 0.056567757 | 0.236890725 |
| RP11-476D10.1 | CTXN1     | 0.209122153 | 9.96E-06    |

|               |          |             |             |
|---------------|----------|-------------|-------------|
| RP11-476D10.1 | PCSK1N   | 0.377861054 | 2.39E-16    |
| RP11-476D10.1 | NMU      | 0.154874635 | 0.001132346 |
| RP11-476D10.1 | GALE     | 0.471068764 | 1.25E-25    |
| RP11-476D10.1 | PCSK2    | 0.495803665 | 1.29E-28    |
| RP11-476D10.1 | GJB3     | 0.337469575 | 3.74E-13    |
| RP11-476D10.1 | SLPI     | 0.083658336 | 0.079961475 |
| RP11-476D10.1 | AGR2     | 0.382203626 | 1.02E-16    |
| RP11-476D10.1 | MRC2     | 0.295141273 | 2.84E-10    |
| RP11-476D10.1 | GOLT1A   | 0.547073133 | 1.23E-35    |
| RP11-476D10.1 | SLC27A6  | 0.117257245 | 0.013959917 |
| RP11-476D10.1 | KCNN4    | 0.197942186 | 2.95E-05    |
| RP11-476D10.1 | ETV4     | 0.347381363 | 6.77E-14    |
| RP11-476D10.1 | SYT12    | 0.274323565 | 5.10E-09    |
| RP11-476D10.1 | PVRL4    | 0.188259482 | 7.22E-05    |
| RP11-476D10.1 | PLCD3    | 0.165648209 | 0.000492275 |
| RP11-476D10.1 | PLAU     | 0.338266574 | 3.26E-13    |
| RP11-476D10.1 | LRRK2    | 0.900910471 | 1.63E-160   |
| RP11-476D10.1 | SFN      | 0.142713966 | 0.002726336 |
| RP11-476D10.1 | LPAR5    | 0.366559388 | 2.08E-15    |
| RP11-476D10.1 | NGEF     | 0.161875124 | 0.000662926 |
| RP11-476D10.1 | DTX4     | 0.191371309 | 5.45E-05    |
| RP11-476D10.1 | CST6     | 0.257650847 | 4.36E-08    |
| RP11-476D10.1 | QPCT     | 0.505078154 | 8.48E-30    |
| RP11-476D10.1 | TIMP1    | 0.411502652 | 2.27E-19    |
| RP11-476D10.1 | CAMK2N1  | 0.374691356 | 4.43E-16    |
| RP11-476D10.1 | KLHDC8A  | 0.614711498 | 5.68E-47    |
| RP11-476D10.1 | PDLIM4   | 0.177357096 | 0.00018764  |
| RP11-476D10.1 | SCEL     | 0.311434853 | 2.50E-11    |
| RP11-476D10.1 | LCN2     | 0.064471504 | 0.17753626  |
| RP11-476D10.1 | PROS1    | 0.16054424  | 0.000735187 |
| RP11-476D10.1 | GABRB2   | 0.306290744 | 5.47E-11    |
| RP11-476D10.1 | TMPRSS6  | 0.126667754 | 0.007880953 |
| RP11-476D10.1 | KLK7     | 0.109473282 | 0.021785955 |
| RP11-476D10.1 | PDZK1IP1 | 0.370214462 | 1.04E-15    |
| RP11-476D10.1 | CDH3     | 0.388732944 | 2.75E-17    |
| RP11-476D10.1 | LRP4     | 0.670064537 | 1.58E-58    |
| RP11-476D10.1 | IGSF1    | 0.441198122 | 2.45E-22    |
| RP11-476D10.1 | B3GNT3   | 0.037956796 | 0.427602098 |
| RP11-476D10.1 | CLDN1    | 0.250764659 | 1.01E-07    |
| RP11-476D10.1 | GDF15    | 0.110921818 | 0.020092207 |
| RP11-476D10.1 | ARHGAP36 | 0.456895933 | 5.00E-24    |
| RP11-476D10.1 | LAMB3    | 0.243636634 | 2.36E-07    |
| RP11-476D10.1 | KLK10    | 0.199448384 | 2.56E-05    |
| RP11-476D10.1 | DPP4     | 0.309460157 | 3.38E-11    |
| RP11-476D10.1 | METTL7B  | 0.47439179  | 5.11E-26    |
| RP11-476D10.1 | LIPH     | 0.377485036 | 2.58E-16    |
| RP11-476D10.1 | CLDN16   | 0.272428867 | 6.56E-09    |
| RP11-476D10.1 | CHI3L1   | 0.30504468  | 6.60E-11    |
| RP11-476D10.1 | SLC22A31 | 0.524239924 | 2.32E-32    |
| RP11-476D10.1 | TACSTD2  | 0.144970781 | 0.002327456 |
| RP11-476D10.1 | SFTPB    | 0.150574168 | 0.001556481 |

|               |           |              |             |
|---------------|-----------|--------------|-------------|
| RP11-476D10.1 | RXRG      | 0.633280758  | 1.38E-50    |
| RP11-476D10.1 | DCSTAMP   | 0.150893566  | 0.001520561 |
| RP11-476D10.1 | CITED1    | 0.517383337  | 2.00E-31    |
| RP11-476D10.1 | SERPINA1  | 0.258372528  | 3.98E-08    |
| RP11-476D10.1 | PRR15     | 0.587163627  | 4.94E-42    |
| RP11-476D10.1 | SLC34A2   | 0.0823127    | 0.084951894 |
| RP11-476D10.1 | FN1       | 0.107556949  | 0.024216025 |
| RP11-476D10.1 | ZCCHC12   | 0.64039545   | 4.87E-52    |
| AC079630.4    | TFF3      | -0.315063245 | 1.84E-11    |
| AC079630.4    | CCL21     | -0.291316125 | 4.91E-10    |
| AC079630.4    | TPO       | -0.23718927  | 5.38E-07    |
| AC079630.4    | MT1G      | -0.266353254 | 1.65E-08    |
| AC079630.4    | DI01      | -0.305720575 | 7.49E-11    |
| AC079630.4    | DPT       | -0.312694038 | 2.06E-11    |
| AC079630.4    | CDH16     | -0.410176956 | 0           |
| AC079630.4    | CRABP1    | -0.28560884  | 1.10E-09    |
| AC079630.4    | SLC26A7   | -0.215005092 | 5.78E-06    |
| AC079630.4    | MT1H      | -0.294181315 | 3.26E-10    |
| AC079630.4    | SLC26A4   | -0.116531118 | 0.014607726 |
| AC079630.4    | SLC5A8    | -0.3930086   | 1.15E-17    |
| AC079630.4    | PKHD1L1   | -0.395691483 | 6.61E-18    |
| AC079630.4    | TFCP2L1   | -0.384677902 | 0           |
| AC079630.4    | WSCD2     | -0.257644747 | 4.36E-08    |
| AC079630.4    | IPCEF1    | -0.330177552 | 1.69E-12    |
| AC079630.4    | SLC5A5    | -0.302729951 | 9.33E-11    |
| AC079630.4    | MT1F      | -0.303474584 | 1.04E-10    |
| AC079630.4    | FOSB      | -0.110502614 | 0.020611709 |
| AC079630.4    | SEMA3D    | -0.334739968 | 5.92E-13    |
| AC079630.4    | BMP8A     | -0.184448126 | 0.000104214 |
| AC079630.4    | MATN2     | -0.350963783 | 4.83E-14    |
| AC079630.4    | PLA2R1    | -0.422056099 | 0           |
| AC079630.4    | COL23A1   | -0.246810508 | 1.78E-07    |
| AC079630.4    | HGD       | -0.230760219 | 1.10E-06    |
| AC079630.4    | TCEAL2    | -0.246925964 | 1.76E-07    |
| AC079630.4    | CHRD1     | -0.266150082 | 1.49E-08    |
| AC079630.4    | TNFRSF11B | -0.357436663 | 1.45E-14    |
| AC079630.4    | FAM167A   | -0.157882882 | 0.000913909 |
| AC079630.4    | KIT       | -0.37627391  | 2.17E-16    |
| AC079630.4    | SLC4A4    | -0.321160682 | 7.15E-12    |
| AC079630.4    | SMOC2     | -0.258574622 | 4.35E-08    |
| AC079630.4    | FHL1      | -0.217659999 | 4.40E-06    |
| AC079630.4    | OTOS      | -0.285996562 | 1.24E-09    |
| AC079630.4    | IGFBPL1   | -0.341615772 | 1.84E-13    |
| AC079630.4    | HBB       | -0.180111456 | 0.000151771 |
| AC079630.4    | BEX1      | -0.080069614 | 0.093818138 |
| AC079630.4    | FABP4     | -0.188336618 | 7.17E-05    |
| AC079630.4    | LMOD1     | -0.172186164 | 0.000295186 |
| AC079630.4    | SOD3      | -0.279987774 | 2.79E-09    |
| AC079630.4    | TMEM171   | -0.468740089 | 0           |
| AC079630.4    | PI16      | -0.237073815 | 5.45E-07    |
| AC079630.4    | ZMAT4     | -0.313924619 | 1.70E-11    |



|            |            |              |             |
|------------|------------|--------------|-------------|
| AC079630.4 | MFAP4      | -0.175823294 | 0.000218284 |
| AC079630.4 | CWH43      | -0.477882006 | 1.98E-26    |
| AC079630.4 | SPX        | -0.176995578 | 0.000197801 |
| AC079630.4 | APOD       | -0.279939265 | 2.81E-09    |
| AC079630.4 | DPP6       | -0.369005892 | 1.36E-15    |
| AC079630.4 | MMRN1      | -0.2759674   | 4.76E-09    |
| AC079630.4 | WDR72      | -0.33702715  | 5.47E-13    |
| AC079630.4 | MPPED2     | -0.203893004 | 1.74E-05    |
| AC079630.4 | PAPSS2     | -0.368629031 | 1.48E-15    |
| AC079630.4 | DCN        | -0.299591935 | 1.83E-10    |
| AC079630.4 | SORBS2     | -0.26387465  | 2.25E-08    |
| AC079630.4 | EGR2       | -0.059469756 | 0.213564577 |
| AC079630.4 | EDN3       | 0.156984607  | 0.000965814 |
| AC079630.4 | DIO2       | -0.215449468 | 5.52E-06    |
| AC079630.4 | ITPR1      | -0.189093008 | 6.90E-05    |
| AC079630.4 | CFD        | -0.243552651 | 2.61E-07    |
| AC079630.4 | CPXM1      | -0.276930191 | 4.19E-09    |
| AC079630.4 | ELMO1      | -0.171091181 | 0.000322891 |
| AC079630.4 | GPC3       | -0.271528049 | 7.39E-09    |
| AC079630.4 | MYOC       | -0.089036782 | 0.062334025 |
| AC079630.4 | DEPTOR     | -0.345829847 | 1.21E-13    |
| AC079630.4 | DGKI       | -0.385748205 | 0           |
| AC079630.4 | CARTPT     | -0.121248926 | 0.011003393 |
| AC079630.4 | IYD        | -0.30685584  | 6.33E-11    |
| AC079630.4 | LYVE1      | -0.237123458 | 5.42E-07    |
| AC079630.4 | CLCNKB     | -0.219386299 | 3.68E-06    |
| AC079630.4 | NCAM1      | -0.496549244 | 0           |
| AC079630.4 | HBA2       | -0.157798631 | 0.000919768 |
| AC079630.4 | GLT8D2     | -0.240116221 | 3.86E-07    |
| AC079630.4 | OGDHL      | -0.44053379  | 0           |
| AC079630.4 | LIFR       | -0.20647217  | 1.35E-05    |
| AC079630.4 | CSGALNACT1 | -0.434018501 | 0           |
| AC079630.4 | RAP1GAP    | -0.435391343 | 0           |
| AC079630.4 | COL9A3     | -0.177703345 | 0.000186322 |
| AC079630.4 | FBLN1      | -0.355937019 | 1.93E-14    |
| AC079630.4 | EFEMP1     | -0.384710666 | 0           |
| AC079630.4 | AOX1       | -0.389547397 | 2.34E-17    |
| AC079630.4 | GRIN2C     | -0.226183985 | 1.80E-06    |
| AC079630.4 | C11orf74   | -0.292362212 | 5.12E-10    |
| AC079630.4 | PPARGC1A   | -0.431259627 | 0           |
| AC079630.4 | ANGPTL1    | -0.184581595 | 0.000103001 |
| AC079630.4 | SCARA5     | -0.309176433 | 3.53E-11    |
| AC079630.4 | LTF        | -0.260886993 | 3.27E-08    |
| AC079630.4 | CA4        | 0.011320735  | 0.813023728 |
| AC079630.4 | TG         | -0.038940817 | 0.415563158 |
| AC079630.4 | FCGBP      | -0.253336435 | 8.23E-08    |
| AC079630.4 | PBX4       | -0.211176057 | 8.50E-06    |
| AC079630.4 | CYR61      | -0.1571693   | 0.000964646 |
| AC079630.4 | FOS        | -0.13090702  | 0.006049361 |
| AC079630.4 | KHDRBS2    | -0.150712873 | 0.001557077 |
| AC079630.4 | MUM1L1     | -0.348001657 | 8.23E-14    |

|            |          |              |             |
|------------|----------|--------------|-------------|
| AC079630.4 | RGS16    | -0.227561366 | 1.55E-06    |
| AC079630.4 | MT1M     | -0.285236031 | 1.37E-09    |
| AC079630.4 | LRP2     | -0.275793082 | 4.87E-09    |
| AC079630.4 | MAFB     | -0.297367928 | 2.52E-10    |
| AC079630.4 | KCNK2    | -0.365158985 | 3.13E-15    |
| AC079630.4 | TBC1D4   | -0.175575362 | 0.000222863 |
| AC079630.4 | MIOX     | -0.165377349 | 0.000503013 |
| AC079630.4 | TPPP     | -0.336256407 | 6.22E-13    |
| AC079630.4 | FMOD     | -0.455376053 | 0           |
| AC079630.4 | CITED2   | -0.392326753 | 0           |
| AC079630.4 | RGS8     | -0.280495393 | 2.22E-09    |
| AC079630.4 | ABI3BP   | -0.36094699  | 7.35E-15    |
| AC079630.4 | ADH1B    | -0.257622413 | 4.37E-08    |
| AC079630.4 | OGN      | -0.319417442 | 7.19E-12    |
| AC079630.4 | NR4A1    | -0.064756735 | 0.175554223 |
| AC079630.4 | FOXJ1    | -0.106232243 | 0.026029711 |
| AC079630.4 | ALDH1A1  | -0.225262895 | 1.98E-06    |
| AC079630.4 | OCA2     | -0.378201469 | 2.24E-16    |
| AC079630.4 | TMEM139  | -0.428108432 | 0           |
| AC079630.4 | ARHGAP24 | -0.207649418 | 1.21E-05    |
| AC079630.4 | SLC25A15 | -0.358688801 | 1.14E-14    |
| AC079630.4 | DES      | -0.266935576 | 1.34E-08    |
| AC079630.4 | GDF10    | -0.259336648 | 3.53E-08    |
| AC079630.4 | KIAA1324 | -0.182697714 | 0.000121413 |
| AC079630.4 | JUN      | -0.137857749 | 0.003829296 |
| AC079630.4 | C7       | -0.207548288 | 1.22E-05    |
| AC079630.4 | LGI3     | -0.156689465 | 0.001000213 |
| AC079630.4 | CDON     | -0.194409348 | 4.26E-05    |
| AC079630.4 | BCL2     | -0.381065452 | 3.41E-17    |
| AC079630.4 | HLF      | -0.068002678 | 0.154856176 |
| AC079630.4 | EGR1     | -0.086233855 | 0.071083684 |
| AC079630.4 | IP6K3    | -0.41096784  | 0           |
| AC079630.4 | SCUBE3   | -0.245778501 | 2.01E-07    |
| AC079630.4 | PKNOX2   | -0.157658496 | 0.000929591 |
| AC079630.4 | SMAD9    | -0.456721662 | 0           |
| AC079630.4 | IQGAP2   | -0.346245429 | 1.12E-13    |
| AC079630.4 | GNA14    | -0.192544473 | 5.05E-05    |
| AC079630.4 | LAYN     | -0.258993609 | 4.13E-08    |
| AC079630.4 | AVPR1A   | -0.174947875 | 0.000234857 |
| AC079630.4 | PDLIM3   | -0.367010243 | 2.11E-15    |
| AC079630.4 | GPM6A    | -0.308766953 | 4.76E-11    |
| AC079630.4 | SDPR     | 0.041213757  | 0.388856229 |
| AC079630.4 | CRYAB    | -0.556313454 | 0           |
| AC079630.4 | FOXA2    | -0.128932903 | 0.00682959  |
| AC079630.4 | C8orf88  | -0.280027204 | 2.78E-09    |
| AC079630.4 | ISM1     | -0.103518837 | 0.030151759 |
| AC079630.4 | BMP2     | -0.330538385 | 1.60E-12    |
| AC079630.4 | ID4      | -0.345997356 | 1.17E-13    |
| AC079630.4 | NUPR1    | -0.481520182 | 0           |
| AC079630.4 | SERTM1   | -0.478348554 | 1.75E-26    |
| AC079630.4 | IRS1     | -0.135798699 | 0.004394125 |

|            |          |              |             |
|------------|----------|--------------|-------------|
| AC079630.4 | FIBIN    | -0.465851718 | 0           |
| AC079630.4 | PODN     | -0.291871456 | 5.49E-10    |
| AC079630.4 | TDRD9    | -0.381419903 | 2.75E-17    |
| AC079630.4 | EPHA3    | -0.249161884 | 1.35E-07    |
| AC079630.4 | AIF1L    | -0.408998431 | 0           |
| AC079630.4 | EBF4     | -0.201551556 | 2.18E-05    |
| AC079630.4 | ADM2     | -0.370821833 | 8.97E-16    |
| AC079630.4 | GSTM3    | -0.247029647 | 1.74E-07    |
| AC079630.4 | HSD17B6  | -0.114857865 | 0.016096588 |
| AC079630.4 | AGR3     | -0.311335069 | 2.54E-11    |
| AC079630.4 | EPHB1    | -0.420296184 | 0           |
| AC079630.4 | TMOD1    | -0.300914282 | 1.51E-10    |
| AC079630.4 | WASF3    | -0.23233532  | 9.23E-07    |
| AC079630.4 | SELV     | -0.240937453 | 3.23E-07    |
| AC079630.4 | ENPP1    | -0.291646928 | 5.66E-10    |
| AC079630.4 | SYNE1    | -0.190470041 | 5.91E-05    |
| AC079630.4 | PLCH1    | -0.273415041 | 6.65E-09    |
| AC079630.4 | CCDC146  | -0.220984804 | 3.12E-06    |
| AC079630.4 | SLC16A2  | -0.133963185 | 0.004960006 |
| AC079630.4 | IER2     | -0.094561113 | 0.047725069 |
| AC079630.4 | KCNAB1   | 0.093638463  | 0.049946037 |
| AC079630.4 | SYNDIG1  | -0.365549747 | 2.88E-15    |
| AC079630.4 | C16orf89 | 0.0284009    | 0.552711168 |
| AC079630.4 | CTGF     | -0.093474641 | 0.050349282 |
| AC079630.4 | NR4A3    | -0.1475943   | 0.001949598 |
| AC079630.4 | KIAA1456 | -0.270769778 | 9.37E-09    |
| AC079630.4 | AQP4     | -0.069748551 | 0.144516705 |
| AC079630.4 | RNF150   | -0.269307863 | 1.13E-08    |
| AC079630.4 | C1S      | -0.288418005 | 8.87E-10    |
| AC079630.4 | PFKFB2   | -0.344538278 | 1.51E-13    |
| AC079630.4 | PROX1    | -0.237472377 | 5.21E-07    |
| AC079630.4 | TCF7L1   | -0.157467867 | 0.000943109 |
| AC079630.4 | HSPB6    | -0.128273956 | 0.007155378 |
| AC079630.4 | FHDC1    | -0.229009239 | 1.33E-06    |
| AC079630.4 | PRR15L   | -0.249297764 | 1.33E-07    |
| AC079630.4 | SLC1A1   | -0.396405563 | 0           |
| AC079630.4 | BTBD11   | -0.080029474 | 0.093983304 |
| AC079630.4 | TRIM58   | -0.298592266 | 2.11E-10    |
| AC079630.4 | LRIG1    | -0.425144603 | 0           |
| AC079630.4 | ROR2     | -0.463464315 | 0           |
| AC079630.4 | GPR125   | -0.355065429 | 2.27E-14    |
| AC079630.4 | FLRT1    | -0.198805448 | 2.82E-05    |
| AC079630.4 | PGF      | -0.18609216  | 9.02E-05    |
| AC079630.4 | DUSP1    | -0.131645708 | 0.005767989 |
| AC079630.4 | PLA2G7   | -0.401264478 | 0           |
| AC079630.4 | PLSCR4   | -0.326571059 | 3.03E-12    |
| AC079630.4 | FAM46B   | -0.451956076 | 0           |
| AC079630.4 | GLDC     | -0.287789951 | 9.67E-10    |
| AC079630.4 | ZBTB16   | -0.164648372 | 0.000541532 |
| AC079630.4 | OMD      | -0.313573875 | 1.80E-11    |
| AC079630.4 | HSD11B2  | -0.08060207  | 0.091649107 |

|            |          |              |             |
|------------|----------|--------------|-------------|
| AC079630.4 | FGL2     | -0.25051416  | 1.15E-07    |
| AC079630.4 | CLCNKA   | -0.212347852 | 7.20E-06    |
| AC079630.4 | GATM     | -0.209662938 | 9.88E-06    |
| AC079630.4 | TNS3     | -0.481830096 | 0           |
| AC079630.4 | TOB1     | -0.342454974 | 2.17E-13    |
| AC079630.4 | MARC2    | -0.24739743  | 1.67E-07    |
| AC079630.4 | LRRC2    | -0.326750767 | 2.95E-12    |
| AC079630.4 | SORD     | -0.426123563 | 0           |
| AC079630.4 | RIMS4    | -0.201606731 | 2.17E-05    |
| AC079630.4 | SLC29A4  | -0.245265618 | 2.14E-07    |
| AC079630.4 | SLC39A14 | -0.297792872 | 2.37E-10    |
| AC079630.4 | FAXDC2   | -0.211630361 | 8.12E-06    |
| AC079630.4 | HSPB8    | -0.51728172  | 0           |
| AC079630.4 | CCL19    | -0.173284884 | 0.000264285 |
| AC079630.4 | KCNIP3   | -0.040511238 | 0.39699736  |
| AC079630.4 | CGNL1    | -0.086420939 | 0.070471289 |
| AC079630.4 | ATF3     | -0.121901497 | 0.010614852 |
| AC079630.4 | SGCD     | -0.487828672 | 0           |
| AC079630.4 | STARD13  | -0.282107388 | 2.10E-09    |
| AC079630.4 | LDHD     | -0.151713251 | 0.001447453 |
| AC079630.4 | RCAN1    | -0.296036078 | 3.05E-10    |
| AC079630.4 | ID3      | -0.447163116 | 0           |
| AC079630.4 | SYTL3    | -0.220204274 | 3.38E-06    |
| AC079630.4 | MT1E     | -0.222706139 | 2.60E-06    |
| AC079630.4 | CAMK1D   | -0.099793201 | 0.036639515 |
| AC079630.4 | PRKCQ    | -0.268672007 | 1.23E-08    |
| AC079630.4 | NUAK2    | -0.534803144 | 0           |
| AC079630.4 | LIPG     | 0.031668969  | 0.507942946 |
| AC079630.4 | SLC25A25 | -0.422370552 | 0           |
| AC079630.4 | PRKX     | -0.4749483   | 0           |
| AC079630.4 | SRPX     | -0.17838856  | 0.000175806 |
| AC079630.4 | FAM189A1 | -0.109806194 | 0.02142757  |
| AC079630.4 | PLEKHH1  | -0.164571921 | 0.000544805 |
| AC079630.4 | WNT11    | -0.318710871 | 1.05E-11    |
| AC079630.4 | SNAI1    | -0.442442492 | 0           |
| AC079630.4 | FDCSP    | -0.13464738  | 0.004713148 |
| AC079630.4 | MT1X     | -0.213434388 | 6.78E-06    |
| AC079630.4 | ACACB    | -0.258315202 | 4.49E-08    |
| AC079630.4 | ARC      | 0.08273062   | 0.08337666  |
| AC079630.4 | KLK4     | -0.621146096 | 3.38E-48    |
| AC079630.4 | ZFPM2    | -0.290370961 | 6.76E-10    |
| AC079630.4 | AKAP12   | -0.243976319 | 2.48E-07    |
| AC079630.4 | GJB6     | -0.391922715 | 1.44E-17    |
| AC079630.4 | ERO1LB   | -0.1815633   | 0.000133949 |
| AC079630.4 | DNALI1   | -0.101815232 | 0.032984827 |
| AC079630.4 | HKDC1    | -0.473379156 | 0           |
| AC079630.4 | ZFP36L2  | -0.372598343 | 5.84E-16    |
| AC079630.4 | CAPSL    | -0.059618334 | 0.212511    |
| AC079630.4 | CYP7B1   | -0.292519935 | 5.01E-10    |
| AC079630.4 | CPQ      | -0.116681323 | 0.014480193 |
| AC079630.4 | RPS6KA6  | -0.234635146 | 6.64E-07    |

|            |          |              |             |
|------------|----------|--------------|-------------|
| AC079630.4 | TLE1     | -0.50867178  | 0           |
| AC079630.4 | TP53INP2 | -0.146416343 | 0.002120073 |
| AC079630.4 | KATNAL2  | -0.221763773 | 2.87E-06    |
| AC079630.4 | SGPP2    | -0.488206952 | 0           |
| AC079630.4 | CTH      | -0.390821861 | 0           |
| AC079630.4 | KIF12    | -0.340738745 | 2.92E-13    |
| AC079630.4 | TMEM220  | -0.18830255  | 7.41E-05    |
| AC079630.4 | CENPJ    | -0.292187043 | 5.25E-10    |
| AC079630.4 | FAM155B  | 0.251282491  | 1.05E-07    |
| AC079630.4 | WFS1     | -0.395809564 | 0           |
| AC079630.4 | SELENBP1 | -0.027605052 | 0.563898382 |
| AC079630.4 | SNTA1    | -0.362968311 | 4.90E-15    |
| AC079630.4 | FRAS1    | -0.631360332 | 0           |
| AC079630.4 | FBLN7    | -0.343063171 | 1.96E-13    |
| AC079630.4 | AGPAT9   | -0.143283728 | 0.002641858 |
| AC079630.4 | GPR83    | -0.146396911 | 0.002122996 |
| AC079630.4 | PRTG     | -0.25351444  | 8.05E-08    |
| AC079630.4 | EGR3     | 0.037854486  | 0.428700055 |
| AC079630.4 | GRAMD2   | -0.519373959 | 0           |
| AC079630.4 | HYOU1    | -0.237963843 | 4.93E-07    |
| AC079630.4 | FBLN5    | -0.215510883 | 5.49E-06    |
| AC079630.4 | ITM2A    | -0.064828363 | 0.175076302 |
| AC079630.4 | SRF      | -0.191990032 | 5.31E-05    |
| AC079630.4 | FGFR2    | -0.310737213 | 3.54E-11    |
| AC079630.4 | MT1A     | -0.214807024 | 5.60E-06    |
| AC079630.4 | MAMDC2   | -0.216976061 | 4.72E-06    |
| AC079630.4 | FHL2     | -0.434029848 | 0           |
| AC079630.4 | FTCDNL1  | -0.484103887 | 0           |
| AC079630.4 | PKIA     | -0.080136986 | 0.093541438 |
| AC079630.4 | DNAJB4   | -0.124738381 | 0.008924214 |
| AC079630.4 | SLC25A33 | -0.27373148  | 6.38E-09    |
| AC079630.4 | EYA2     | -0.534486989 | 0           |
| AC079630.4 | LPAR1    | -0.560337516 | 0           |
| AC079630.4 | STX11    | -0.293641725 | 4.28E-10    |
| AC079630.4 | ARHGEF28 | -0.396348119 | 0           |
| AC079630.4 | OR2W3    | -0.215881362 | 5.28E-06    |
| AC079630.4 | ALDH1B1  | -0.486547262 | 1.81E-27    |
| AC079630.4 | CXCL12   | -0.159172891 | 0.000828396 |
| AC079630.4 | OLFM2    | -0.089598232 | 0.06071386  |
| AC079630.4 | TUB      | -0.326993166 | 2.83E-12    |
| AC079630.4 | HTRA3    | -0.28791264  | 9.51E-10    |
| AC079630.4 | CKB      | -0.259192748 | 4.03E-08    |
| AC079630.4 | RGS2     | -0.275538627 | 5.04E-09    |
| AC079630.4 | SHANK2   | -0.172838473 | 0.000279754 |
| AC079630.4 | CNTFR    | -0.004142826 | 0.931025443 |
| AC079630.4 | CYTH3    | -0.266231983 | 1.67E-08    |
| AC079630.4 | PLAC9    | -0.069348854 | 0.146835939 |
| AC079630.4 | WVOX     | -0.207737925 | 1.20E-05    |
| AC079630.4 | NPR3     | -0.195233989 | 3.94E-05    |
| AC079630.4 | SDC2     | -0.187877606 | 7.69E-05    |
| AC079630.4 | KLF15    | -0.110162489 | 0.02100673  |

|            |          |              |             |
|------------|----------|--------------|-------------|
| AC079630.4 | TMEM164  | -0.411831912 | 0           |
| AC079630.4 | LONRF3   | -0.04047124  | 0.397463941 |
| AC079630.4 | GBP1     | -0.157380779 | 0.000949345 |
| AC079630.4 | ARHGAP6  | -0.410432972 | 0           |
| AC079630.4 | TMEM119  | -0.219477926 | 3.65E-06    |
| AC079630.4 | SH3RF1   | -0.390914197 | 0           |
| AC079630.4 | CRELD2   | -0.181992783 | 0.000129067 |
| AC079630.4 | PCP4     | -0.346608674 | 1.05E-13    |
| AC079630.4 | GCSH     | -0.173447947 | 0.00026602  |
| AC079630.4 | IMPA2    | -0.292137259 | 5.29E-10    |
| AC079630.4 | C1R      | -0.266681749 | 1.58E-08    |
| AC079630.4 | SUCNR1   | -0.131743717 | 0.005731555 |
| AC079630.4 | SFRP1    | -0.175511536 | 0.000224056 |
| AC079630.4 | UGT8     | -0.383200385 | 2.76E-18    |
| AC079630.4 | TLE4     | -0.277876528 | 3.70E-09    |
| AC079630.4 | ANTXR1   | -0.267438733 | 1.44E-08    |
| AC079630.4 | GPX3     | -0.426708925 | 0           |
| AC079630.4 | DPY19L2  | -0.201246607 | 2.24E-05    |
| AC079630.4 | FAM46C   | -0.256301682 | 5.75E-08    |
| AC079630.4 | IL33     | -0.19570298  | 3.65E-05    |
| AC079630.4 | PEG3     | -0.218276282 | 4.13E-06    |
| AC079630.4 | FAHD2A   | -0.34012998  | 3.24E-13    |
| AC079630.4 | PTGDS    | -0.084989235 | 0.075269414 |
| AC079630.4 | CHCHD10  | -0.368140402 | 1.65E-15    |
| AC079630.4 | CD36     | -0.049317763 | 0.302411738 |
| AC079630.4 | ANKRD37  | -0.143657469 | 0.002573976 |
| AC079630.4 | TSPAN33  | -0.26286945  | 2.56E-08    |
| AC079630.4 | PRDM16   | -0.207979899 | 1.17E-05    |
| AC079630.4 | UST      | 0.110870114  | 0.020192172 |
| AC079630.4 | NEXN     | -0.145173141 | 0.002314689 |
| AC079630.4 | NUPR1L   | -0.100140951 | 0.03595122  |
| AC079630.4 | SLC24A3  | -0.396427265 | 0           |
| AC079630.4 | MARC1    | -0.054767571 | 0.252060487 |
| AC079630.4 | MYH11    | -0.10994179  | 0.021266554 |
| AC079630.4 | APOA1    | -0.201616667 | 2.08E-05    |
| AC079630.4 | TMEM178B | -0.109338415 | 0.021991194 |
| AC079630.4 | CAPN6    | -0.189618366 | 6.39E-05    |
| AC079630.4 | PPM1L    | -0.153912294 | 0.001230971 |
| AC079630.4 | FZD8     | -0.275656777 | 4.96E-09    |
| AC079630.4 | RCAN2    | -0.084405858 | 0.077299298 |
| AC079630.4 | COPZ2    | -0.37183923  | 7.04E-16    |
| AC079630.4 | GAS1     | -0.318120119 | 1.15E-11    |
| AC079630.4 | DACT1    | -0.283999211 | 1.63E-09    |
| AC079630.4 | WBSCR17  | 0.015733709  | 0.742255869 |
| AC079630.4 | NCS1     | -0.41290491  | 0           |
| AC079630.4 | SPIRE2   | -0.37566784  | 2.59E-16    |
| AC079630.4 | C15orf52 | -0.421787318 | 0           |
| AC079630.4 | SPAG5    | -0.364086271 | 3.90E-15    |
| AC079630.4 | ARL4D    | -0.271425917 | 8.61E-09    |
| AC079630.4 | FAM189A2 | -0.074891424 | 0.117117103 |
| AC079630.4 | MAP1LC3A | -0.158352789 | 0.000881857 |

|            |          |              |             |
|------------|----------|--------------|-------------|
| AC079630.4 | KLF6     | -0.130595971 | 0.006171487 |
| AC079630.4 | ADD3     | -0.165100974 | 0.000522527 |
| AC079630.4 | TSPAN7   | -0.003108644 | 0.948195453 |
| AC079630.4 | KLF9     | 0.014158608  | 0.767274562 |
| AC079630.4 | KCNQ1    | -0.113767137 | 0.017137288 |
| AC079630.4 | MAN1A1   | -0.253623655 | 7.95E-08    |
| AC079630.4 | MLF1     | -0.270006553 | 1.03E-08    |
| AC079630.4 | RARB     | -0.120567944 | 0.011503512 |
| AC079630.4 | CDC42EP2 | -0.211415194 | 8.30E-06    |
| AC079630.4 | FAM3B    | -0.297521112 | 2.47E-10    |
| AC079630.4 | GADD45B  | -0.111333496 | 0.019673783 |
| AC079630.4 | TMEM47   | -0.017645674 | 0.712249844 |
| AC079630.4 | SDF2L1   | -0.067207255 | 0.159748656 |
| AC079630.4 | CCDC85A  | -0.330660082 | 1.57E-12    |
| AC079630.4 | CRYBG3   | -0.407430847 | 0           |
| AC079630.4 | FBLN2    | -0.243030974 | 2.77E-07    |
| AC079630.4 | PEBP4    | 0.017500291  | 0.714516594 |
| AC079630.4 | CDADC1   | -0.109635138 | 0.021632202 |
| AC079630.4 | FAM63A   | -0.189688441 | 6.54E-05    |
| AC079630.4 | GLUL     | -0.276123988 | 4.66E-09    |
| AC079630.4 | FREM2    | -0.292519935 | 5.01E-10    |
| AC079630.4 | ACKR3    | -0.212855267 | 7.18E-06    |
| AC079630.4 | DENND6A  | -0.256717832 | 5.46E-08    |
| AC079630.4 | CLDN8    | -0.603109779 | 0           |
| AC079630.4 | UTS2R    | -0.25073285  | 1.02E-07    |
| AC079630.4 | SCNN1B   | -0.316407436 | 1.50E-11    |
| AC079630.4 | TTC30A   | -0.351995365 | 4.01E-14    |
| AC079630.4 | CORO2B   | -0.021719378 | 0.649828584 |
| AC079630.4 | TC2N     | -0.608981269 | 0           |
| AC079630.4 | ALDH2    | -0.26076402  | 3.32E-08    |
| AC079630.4 | GPR183   | -0.094418    | 0.048064042 |
| AC079630.4 | C4orf47  | -0.158837872 | 0.000849862 |
| AC079630.4 | SLC25A42 | 0.006196155  | 0.896956821 |
| AC079630.4 | LGMN     | -0.321341666 | 6.95E-12    |
| AC079630.4 | ACSF2    | -0.381308845 | 2.95E-17    |
| AC079630.4 | KIAA1467 | -0.331736625 | 1.31E-12    |
| AC079630.4 | PRKG1    | -0.000494302 | 0.991757971 |
| AC079630.4 | GNAI1    | -0.101612263 | 0.033337049 |
| AC079630.4 | ABCC4    | -0.362160265 | 5.77E-15    |
| AC079630.4 | PRPS1    | -0.321598533 | 6.68E-12    |
| AC079630.4 | TSPAN5   | -0.615188062 | 0           |
| AC079630.4 | CR2      | -0.02678084  | 0.575737657 |
| AC079630.4 | CCDC170  | -0.360255676 | 8.42E-15    |
| AC079630.4 | RRAD     | -0.220301858 | 3.35E-06    |
| AC079630.4 | SCGB2A1  | -0.2285677   | 1.39E-06    |
| AC079630.4 | SESN3    | -0.292189455 | 5.25E-10    |
| AC079630.4 | SGK223   | -0.372566855 | 5.89E-16    |
| AC079630.4 | NDRG2    | -0.149699731 | 0.001675825 |
| AC079630.4 | C3orf52  | -0.323011798 | 5.34E-12    |
| AC079630.4 | FLRT3    | 0.3155045    | 1.72E-11    |
| AC079630.4 | MST1R    | 0.161420442  | 0.000696866 |

|            |          |              |             |
|------------|----------|--------------|-------------|
| AC079630.4 | SDC1     | -0.007785298 | 0.870736918 |
| AC079630.4 | ST8SIA4  | 0.053088362  | 0.26691146  |
| AC079630.4 | UBTD1    | 0.439856659  | 0           |
| AC079630.4 | EPHA2    | 0.170883957  | 0.0003284   |
| AC079630.4 | TMEM130  | 0.529690483  | 0           |
| AC079630.4 | SPINK2   | 0.295012297  | 3.52E-10    |
| AC079630.4 | MMP16    | 0.120234769  | 0.011735568 |
| AC079630.4 | SIGLEC15 | 0.370749212  | 9.12E-16    |
| AC079630.4 | RIN1     | 0.422044185  | 0           |
| AC079630.4 | IL1RN    | -0.101350715 | 0.033795655 |
| AC079630.4 | FCER1G   | 0.199062457  | 2.76E-05    |
| AC079630.4 | CD276    | 0.232995146  | 8.58E-07    |
| AC079630.4 | CTSB     | 0.269191273  | 1.15E-08    |
| AC079630.4 | FAM171A2 | 0.597274883  | 0           |
| AC079630.4 | ASPHD1   | 0.290858739  | 6.32E-10    |
| AC079630.4 | C15orf48 | -0.096273229 | 0.043822921 |
| AC079630.4 | DYSF     | 0.524449743  | 0           |
| AC079630.4 | PDZRN4   | 0.509152325  | 0           |
| AC079630.4 | EFHD2    | 0.53936647   | 0           |
| AC079630.4 | ASF1B    | 0.155758162  | 0.001072723 |
| AC079630.4 | AQP1     | 0.504438651  | 0           |
| AC079630.4 | ARRDC2   | 0.382649489  | 9.09E-18    |
| AC079630.4 | PRSS1    | 0.40619101   | 7.20E-19    |
| AC079630.4 | MAPK13   | 0.396020192  | 0           |
| AC079630.4 | CST5     | -0.019513695 | 0.683471581 |
| AC079630.4 | AHR      | 0.079521697  | 0.09609282  |
| AC079630.4 | BAX      | 0.178603585  | 0.000172622 |
| AC079630.4 | C1orf115 | 0.535536159  | 0           |
| AC079630.4 | PLK3     | 0.291489772  | 5.79E-10    |
| AC079630.4 | JAG2     | 0.484178635  | 0           |
| AC079630.4 | RAD23B   | 0.370267533  | 1.02E-15    |
| AC079630.4 | CA12     | 0.44213811   | 0           |
| AC079630.4 | ADTRP    | 0.401952672  | 0           |
| AC079630.4 | UCP2     | 0.366497644  | 2.36E-15    |
| AC079630.4 | IGFBP2   | 0.19958853   | 2.62E-05    |
| AC079630.4 | LOXL2    | 0.305478601  | 7.76E-11    |
| AC079630.4 | GPX1     | 0.31491077   | 1.88E-11    |
| AC079630.4 | P3H3     | 0.398671553  | 0           |
| AC079630.4 | C2orf81  | 0.538014621  | 0           |
| AC079630.4 | CDT1     | 0.166998471  | 0.0004494   |
| AC079630.4 | SNX25    | 0.605718164  | 0           |
| AC079630.4 | MTHFD1L  | 0.132978268  | 0.005290021 |
| AC079630.4 | CDC42BPG | 0.162590179  | 0.000626876 |
| AC079630.4 | MSN      | 0.309893991  | 4.02E-11    |
| AC079630.4 | SIGLEC6  | 0.310095677  | 3.07E-11    |
| AC079630.4 | F2R      | 0.176430215  | 0.000207444 |
| AC079630.4 | TMEM184A | 0.167777441  | 0.000422234 |
| AC079630.4 | CKS2     | 0.077123798  | 0.106570117 |
| AC079630.4 | TAX1BP3  | 0.172607846  | 0.000285122 |
| AC079630.4 | PMEP1A   | 0.256070204  | 5.91E-08    |
| AC079630.4 | CXCL16   | 0.117600144  | 0.013721167 |



|            |          |              |             |
|------------|----------|--------------|-------------|
| AC079630.4 | FAXC     | 0.180509451  | 0.000146676 |
| AC079630.4 | VTCN1    | -0.072385337 | 0.129948722 |
| AC079630.4 | SH2D4A   | 0.340954479  | 2.81E-13    |
| AC079630.4 | RNF24    | 0.312265082  | 2.81E-11    |
| AC079630.4 | LY6G6C   | 0.064480956  | 0.177472592 |
| AC079630.4 | NID1     | 0.202905392  | 1.91E-05    |
| AC079630.4 | STAC     | 0.02655418   | 0.578835048 |
| AC079630.4 | RAB34    | 0.464188252  | 0           |
| AC079630.4 | HES4     | 0.267223425  | 1.48E-08    |
| AC079630.4 | EPHA10   | 0.27762349   | 3.82E-09    |
| AC079630.4 | ENTPD2   | 0.475375372  | 0           |
| AC079630.4 | DDB2     | 0.190222316  | 6.23E-05    |
| AC079630.4 | NKAIN4   | 0.321313157  | 6.98E-12    |
| AC079630.4 | TRIM29   | 0.060067174  | 0.208994324 |
| AC079630.4 | ADCY8    | 0.25573659   | 5.52E-08    |
| AC079630.4 | SFTA2    | 0.070249094  | 0.141651927 |
| AC079630.4 | NRIP1    | 0.280118122  | 2.74E-09    |
| AC079630.4 | VWA1     | 0.527975672  | 0           |
| AC079630.4 | APLNR    | 0.310220926  | 3.83E-11    |
| AC079630.4 | REN      | 0.566142318  | 1.44E-38    |
| AC079630.4 | EDIL3    | 0.402583989  | 0           |
| AC079630.4 | AGRN     | 0.285950181  | 1.25E-09    |
| AC079630.4 | TREM1    | 0.345017403  | 1.39E-13    |
| AC079630.4 | SRL      | 0.414227824  | 0           |
| AC079630.4 | RASGRF1  | 0.460792245  | 0           |
| AC079630.4 | RMI2     | 0.240036651  | 3.90E-07    |
| AC079630.4 | SAMD1    | 0.317676736  | 1.23E-11    |
| AC079630.4 | MGAT4B   | 0.197222403  | 3.28E-05    |
| AC079630.4 | NXN      | 0.112483511  | 0.018437051 |
| AC079630.4 | SH3BGRL3 | 0.218576835  | 4.01E-06    |
| AC079630.4 | CA11     | 0.616029723  | 0           |
| AC079630.4 | PLD3     | 0.697200561  | 0           |
| AC079630.4 | LURAP1L  | 0.04925805   | 0.302998041 |
| AC079630.4 | CARNS1   | 0.463038946  | 0           |
| AC079630.4 | PDLIM7   | 0.452647106  | 0           |
| AC079630.4 | BCL2L1   | 0.089361222  | 0.061400957 |
| AC079630.4 | GGT6     | 0.348273984  | 7.84E-14    |
| AC079630.4 | DPYSL3   | 0.260228443  | 3.55E-08    |
| AC079630.4 | FYN      | 0.391200992  | 0           |
| AC079630.4 | TK1      | 0.111102301  | 0.019930955 |
| AC079630.4 | AK1      | 0.548918634  | 0           |
| AC079630.4 | HIGD1B   | 0.6483632    | 0           |
| AC079630.4 | TMEM59L  | 0.104472267  | 0.028659203 |
| AC079630.4 | MEGF9    | 0.247454875  | 1.65E-07    |
| AC079630.4 | ZFP36L1  | 0.181545004  | 0.000134161 |
| AC079630.4 | ADRA1B   | 0.458685113  | 0           |
| AC079630.4 | EPHA4    | 0.127684197  | 0.007426654 |
| AC079630.4 | TCERG1L  | 0.410271845  | 0           |
| AC079630.4 | NGFR     | 0.377299676  | 1.59E-16    |
| AC079630.4 | EBI3     | 0.09424042   | 0.048487454 |
| AC079630.4 | S100A10  | -0.033040251 | 0.489739858 |

|            |          |              |             |
|------------|----------|--------------|-------------|
| AC079630.4 | S100B    | 0.134743289  | 0.004711924 |
| AC079630.4 | CD44     | 0.703059001  | 0           |
| AC079630.4 | BHLHE41  | 0.2521216    | 9.52E-08    |
| AC079630.4 | FBXO2    | 0.456587767  | 0           |
| AC079630.4 | SLC30A2  | -0.191889044 | 5.36E-05    |
| AC079630.4 | FRMD5    | 0.020795451  | 0.663791683 |
| AC079630.4 | SAMD11   | 0.207893236  | 1.18E-05    |
| AC079630.4 | SIPAIL2  | 0.441504523  | 0           |
| AC079630.4 | S100A16  | 0.078948391  | 0.098519813 |
| AC079630.4 | PPL      | -0.061181163 | 0.20066187  |
| AC079630.4 | ARHGDIB  | 0.439038401  | 0           |
| AC079630.4 | CDC42EP3 | 0.024055152  | 0.615080006 |
| AC079630.4 | RUNX2    | 0.498605174  | 0           |
| AC079630.4 | LAMC2    | -0.02347518  | 0.623632009 |
| AC079630.4 | BRINP1   | 0.3803635    | 4.93E-17    |
| AC079630.4 | GPRC5B   | 0.313341484  | 2.39E-11    |
| AC079630.4 | AQP5     | 0.398688007  | 0           |
| AC079630.4 | PLAG1    | 0.587864415  | 0           |
| AC079630.4 | PTPRU    | 0.010318651  | 0.829240985 |
| AC079630.4 | ANGPTL4  | 0.098105481  | 0.039948156 |
| AC079630.4 | PALM3    | 0.222074538  | 2.78E-06    |
| AC079630.4 | ACP5     | 0.177866032  | 0.000183773 |
| AC079630.4 | DLG4     | 0.725796912  | 0           |
| AC079630.4 | ETNK2    | 0.529279013  | 0           |
| AC079630.4 | CD109    | 0.289855099  | 7.27E-10    |
| AC079630.4 | SNX22    | 0.493035088  | 0           |
| AC079630.4 | TMEM98   | 0.230873121  | 1.08E-06    |
| AC079630.4 | CTHRC1   | 0.025759609  | 0.590250415 |
| AC079630.4 | S100A2   | -0.051057112 | 0.285663979 |
| AC079630.4 | C11orf80 | 0.214802974  | 5.90E-06    |
| AC079630.4 | SREBF1   | 0.35905162   | 1.06E-14    |
| AC079630.4 | PRSS22   | 0.136680642  | 0.004143563 |
| AC079630.4 | CMTM3    | 0.192489298  | 5.07E-05    |
| AC079630.4 | RDH5     | 0.462629604  | 0           |
| AC079630.4 | MYH10    | 0.329221711  | 1.98E-12    |
| AC079630.4 | EVPL     | 0.218635697  | 3.98E-06    |
| AC079630.4 | SCD      | 0.160895361  | 0.000725734 |
| AC079630.4 | CD151    | 0.401211431  | 0           |
| AC079630.4 | S100A4   | 0.217393204  | 4.53E-06    |
| AC079630.4 | BNIP1    | 0.469597353  | 0           |
| AC079630.4 | MAP3K6   | 0.340769665  | 2.90E-13    |
| AC079630.4 | MANEAL   | 0.353860665  | 2.84E-14    |
| AC079630.4 | CD207    | 0.239160551  | 3.97E-07    |
| AC079630.4 | CD1A     | 0.237889441  | 4.59E-07    |
| AC079630.4 | C3       | 0.127532998  | 0.007497667 |
| AC079630.4 | NT5E     | 0.139915522  | 0.003331363 |
| AC079630.4 | CACNG4   | 0.043223478  | 0.366275089 |
| AC079630.4 | FHOD1    | 0.406235302  | 0           |
| AC079630.4 | LEMD1    | 0.279125262  | 3.13E-09    |
| AC079630.4 | ATP11A   | 0.579509499  | 0           |
| AC079630.4 | PPAP2C   | 0.288004976  | 9.39E-10    |

|            |          |             |             |
|------------|----------|-------------|-------------|
| AC079630.4 | DRAM1    | 0.145823748 | 0.002210893 |
| AC079630.4 | CDA      | 0.479723815 | 0           |
| AC079630.4 | CCND2    | 0.591997833 | 0           |
| AC079630.4 | LCN6     | 0.433722148 | 1.46E-21    |
| AC079630.4 | CDH4     | 0.222173824 | 2.75E-06    |
| AC079630.4 | MMP11    | 0.187651518 | 7.85E-05    |
| AC079630.4 | B3GAT1   | 0.260651827 | 3.37E-08    |
| AC079630.4 | SPP1     | 0.120195196 | 0.011763403 |
| AC079630.4 | HLA-DQB1 | 0.035051785 | 0.463684147 |
| AC079630.4 | SDC3     | 0.404290715 | 0           |
| AC079630.4 | CX3CL1   | 0.203734004 | 1.77E-05    |
| AC079630.4 | SDK1     | 0.349984256 | 5.77E-14    |
| AC079630.4 | DOCK9    | 0.32035604  | 8.11E-12    |
| AC079630.4 | CSF2     | 0.30709636  | 4.85E-11    |
| AC079630.4 | GRHL3    | 0.202124862 | 2.06E-05    |
| AC079630.4 | TMEM92   | 0.218040049 | 4.01E-06    |
| AC079630.4 | BASP1    | 0.162502659 | 0.000640694 |
| AC079630.4 | HRH1     | 0.131127293 | 0.005964193 |
| AC079630.4 | ESM1     | 0.314659719 | 1.96E-11    |
| AC079630.4 | B4GALNT3 | 0.093707254 | 0.049777517 |
| AC079630.4 | LMO3     | 0.518064377 | 0           |
| AC079630.4 | C9orf16  | 0.170616169 | 0.000335649 |
| AC079630.4 | SEMA3F   | 0.543359611 | 0           |
| AC079630.4 | PLA2G12B | 0.744358049 | 1.19E-78    |
| AC079630.4 | KLK6     | 0.232908873 | 8.05E-07    |
| AC079630.4 | ST3GAL5  | 0.697613448 | 0           |
| AC079630.4 | FAM132B  | 0.420630778 | 0           |
| AC079630.4 | CDKN1A   | 0.030255846 | 0.527065425 |
| AC079630.4 | E2F1     | 0.163665866 | 0.000585021 |
| AC079630.4 | B3GNT8   | 0.459176295 | 0           |
| AC079630.4 | MTMR11   | 0.337317207 | 5.21E-13    |
| AC079630.4 | MYO1G    | 0.101568151 | 0.033414021 |
| AC079630.4 | TMSB10   | 0.224667605 | 2.11E-06    |
| AC079630.4 | UNC5CL   | 0.190597617 | 6.03E-05    |
| AC079630.4 | ABR      | 0.252058624 | 9.59E-08    |
| AC079630.4 | PLP2     | 0.298845588 | 2.04E-10    |
| AC079630.4 | SRCIN1   | 0.415353018 | 0           |
| AC079630.4 | PDE9A    | 0.188786073 | 7.09E-05    |
| AC079630.4 | TREM2    | 0.230462361 | 1.13E-06    |
| AC079630.4 | KDEL3    | 0.325835066 | 3.41E-12    |
| AC079630.4 | PC       | 0.356679536 | 1.68E-14    |
| AC079630.4 | C2CD4A   | 0.011799856 | 0.805189735 |
| AC079630.4 | PELI1    | 0.203877543 | 1.74E-05    |
| AC079630.4 | SSX1     | 0.243380177 | 2.66E-07    |
| AC079630.4 | MROH6    | 0.332418295 | 1.17E-12    |
| AC079630.4 | ESPN     | 0.503849176 | 0           |
| AC079630.4 | BMP1     | 0.59237285  | 0           |
| AC079630.4 | TM4SF4   | 0.308392154 | 3.98E-11    |
| AC079630.4 | CORO2A   | 0.389933961 | 0           |
| AC079630.4 | CD164L2  | 0.37369653  | 5.37E-16    |
| AC079630.4 | CTSS     | 0.153071341 | 0.001309969 |

|            |          |              |             |
|------------|----------|--------------|-------------|
| AC079630.4 | CLU      | 0.265476275  | 1.84E-08    |
| AC079630.4 | TMSB4X   | 0.256598831  | 5.54E-08    |
| AC079630.4 | WNT10A   | 0.173938072  | 0.000250285 |
| AC079630.4 | NAPSA    | 0.298783321  | 2.06E-10    |
| AC079630.4 | PLEKHA4  | 0.391371196  | 0           |
| AC079630.4 | SFTPA1   | 0.511119923  | 1.37E-30    |
| AC079630.4 | C1orf116 | 0.222567706  | 2.64E-06    |
| AC079630.4 | TM4SF1   | 0.044417149  | 0.353035159 |
| AC079630.4 | SEL1L3   | 0.090095655  | 0.059292473 |
| AC079630.4 | VASN     | 0.281601738  | 2.25E-09    |
| AC079630.4 | NPTXR    | 0.214782124  | 5.91E-06    |
| AC079630.4 | PDE4C    | 0.187100338  | 8.25E-05    |
| AC079630.4 | CDC42EP1 | 0.237066439  | 5.45E-07    |
| AC079630.4 | ENDOD1   | 0.2755443    | 5.03E-09    |
| AC079630.4 | RYR1     | 0.467556884  | 0           |
| AC079630.4 | IL1RAP   | 0.32960765   | 1.86E-12    |
| AC079630.4 | SLC35F2  | 0.265536423  | 1.61E-08    |
| AC079630.4 | ISYNA1   | 0.617512205  | 0           |
| AC079630.4 | HLA-G    | -0.026770766 | 0.57574147  |
| AC079630.4 | CDKN2B   | 0.082458151  | 0.084400667 |
| AC079630.4 | ALDH1A3  | 0.050133185  | 0.294480778 |
| AC079630.4 | CLIP3    | 0.418826893  | 0           |
| AC079630.4 | ULBP2    | 0.325302468  | 3.72E-12    |
| AC079630.4 | ETHE1    | 0.125678194  | 0.008419557 |
| AC079630.4 | XPR1     | 0.300795139  | 1.54E-10    |
| AC079630.4 | SPTBN2   | 0.129360428  | 0.006678755 |
| AC079630.4 | IVL      | 0.239885397  | 3.65E-07    |
| AC079630.4 | MARCO    | 0.085337019  | 0.074080076 |
| AC079630.4 | PLXND1   | 0.524047209  | 0           |
| AC079630.4 | EMILIN2  | 0.368471024  | 1.53E-15    |
| AC079630.4 | PLAUR    | 0.107179228  | 0.024762613 |
| AC079630.4 | CDC42EP5 | 0.252707955  | 8.87E-08    |
| AC079630.4 | TRPC5    | 0.693444144  | 3.37E-64    |
| AC079630.4 | TMEM100  | 0.34541781   | 1.30E-13    |
| AC079630.4 | QSOX1    | 0.264768366  | 2.01E-08    |
| AC079630.4 | ARHGAP23 | 0.375142759  | 3.00E-16    |
| AC079630.4 | MDF1     | 0.317122437  | 1.34E-11    |
| AC079630.4 | FSTL3    | 0.087022895  | 0.068530084 |
| AC079630.4 | INF2     | 0.423552056  | 0           |
| AC079630.4 | TGFBR1   | 0.352660439  | 3.55E-14    |
| AC079630.4 | TGFBI    | 0.238981382  | 4.40E-07    |
| AC079630.4 | ERBB3    | 0.100366933  | 0.035569135 |
| AC079630.4 | CCL18    | 0.117091942  | 0.014136538 |
| AC079630.4 | CCL17    | 0.114504269  | 0.016386572 |
| AC079630.4 | C16orf45 | 0.494327791  | 0           |
| AC079630.4 | PRDM1    | 0.579149091  | 0           |
| AC079630.4 | TRIM47   | 0.149619309  | 0.001685599 |
| AC079630.4 | CNFN     | 0.188936278  | 7.00E-05    |
| AC079630.4 | ARMCX3   | 0.492655815  | 0           |
| AC079630.4 | RAMP1    | 0.42897222   | 0           |
| AC079630.4 | GABRD    | 0.553417991  | 0           |

|            |           |              |             |
|------------|-----------|--------------|-------------|
| AC079630.4 | COL13A1   | 0.667931901  | 0           |
| AC079630.4 | S100A5    | 0.303670887  | 1.01E-10    |
| AC079630.4 | MISP      | -0.050664081 | 0.28939258  |
| AC079630.4 | HES6      | 0.467142152  | 0           |
| AC079630.4 | PSD3      | 0.433622066  | 0           |
| AC079630.4 | DOK7      | 0.176731477  | 0.000202252 |
| AC079630.4 | ZMAT3     | 0.175573802  | 0.000222892 |
| AC079630.4 | MFAP2     | 0.366456228  | 2.38E-15    |
| AC079630.4 | TMEM79    | 0.375965273  | 2.38E-16    |
| AC079630.4 | SLC1A5    | 0.272825991  | 7.18E-09    |
| AC079630.4 | BBC3      | 0.217977998  | 4.26E-06    |
| AC079630.4 | HLA-DQB2  | 0.110276809  | 0.02087323  |
| AC079630.4 | C1QL1     | 0.411865811  | 0           |
| AC079630.4 | TMEM215   | 0.627223095  | 2.21E-49    |
| AC079630.4 | PNP       | 0.183492995  | 0.000113292 |
| AC079630.4 | ARNTL     | 0.277555409  | 3.86E-09    |
| AC079630.4 | CLDN2     | 0.516313629  | 2.79E-31    |
| AC079630.4 | MVP       | 0.257208589  | 5.15E-08    |
| AC079630.4 | LGALS1    | 0.218275147  | 4.13E-06    |
| AC079630.4 | BIRC7     | 0.347396968  | 6.75E-14    |
| AC079630.4 | COL8A1    | 0.367732904  | 1.80E-15    |
| AC079630.4 | PERP      | 0.015636693  | 0.743789347 |
| AC079630.4 | GJA4      | 0.480196274  | 0           |
| AC079630.4 | IGFL2     | 0.258649053  | 3.85E-08    |
| AC079630.4 | DAPK2     | 0.299154934  | 1.95E-10    |
| AC079630.4 | MAMLD1    | 0.329405958  | 1.92E-12    |
| AC079630.4 | ETV5      | 0.726169234  | 0           |
| AC079630.4 | RUNX1     | 0.067808077  | 0.156042506 |
| AC079630.4 | LONRF2    | 0.50060068   | 0           |
| AC079630.4 | SPOCK1    | 0.487701302  | 0           |
| AC079630.4 | XKRX      | 0.499291665  | 0           |
| AC079630.4 | TGFB1     | 0.518860934  | 0           |
| AC079630.4 | ERP27     | 0.162284372  | 0.000651674 |
| AC079630.4 | TNFRSF10C | 0.26976004   | 1.07E-08    |
| AC079630.4 | PALM      | 0.245373273  | 2.11E-07    |
| AC079630.4 | TSC22D1   | 0.60112491   | 0           |
| AC079630.4 | TGM2      | 0.016038659  | 0.737442393 |
| AC079630.4 | UBE2QL1   | 0.645771268  | 0           |
| AC079630.4 | ECE1      | 0.435077883  | 0           |
| AC079630.4 | COL8A2    | 0.219465728  | 3.65E-06    |
| AC079630.4 | HIST3H2A  | 0.092583336  | 0.052591175 |
| AC079630.4 | TNFRSF21  | 0.116593384  | 0.014554739 |
| AC079630.4 | SOX4      | 0.103368916  | 0.030392415 |
| AC079630.4 | ELF3      | -0.006460681 | 0.89258371  |
| AC079630.4 | TPD52L1   | 0.320816443  | 7.55E-12    |
| AC079630.4 | INHBB     | 0.412995118  | 0           |
| AC079630.4 | HPN       | 0.422803439  | 0           |
| AC079630.4 | MMP7      | -0.009272337 | 0.846389416 |
| AC079630.4 | RAB27A    | 0.473312067  | 0           |
| AC079630.4 | IGF2BP2   | 0.490273093  | 0           |
| AC079630.4 | ITGB4     | 0.214587665  | 6.03E-06    |

|            |            |              |             |
|------------|------------|--------------|-------------|
| AC079630.4 | PPP1R1B    | 0.450441255  | 0           |
| AC079630.4 | NPDC1      | 0.562178136  | 0           |
| AC079630.4 | CCL13      | 0.185512892  | 9.24E-05    |
| AC079630.4 | SPINT1     | 0.189025352  | 6.94E-05    |
| AC079630.4 | HEY2       | 0.685551761  | 0           |
| AC079630.4 | CST2       | -0.06434551  | 0.178386631 |
| AC079630.4 | ADM        | 0.461383706  | 0           |
| AC079630.4 | VSTM2L     | 0.027401374  | 0.566778866 |
| AC079630.4 | FAM84A     | 0.280940635  | 2.46E-09    |
| AC079630.4 | P4HA2      | 0.45032353   | 0           |
| AC079630.4 | LPL        | 0.503211476  | 0           |
| AC079630.4 | TMEM173    | 0.452758023  | 0           |
| AC079630.4 | DHRS3      | 0.437882003  | 0           |
| AC079630.4 | SCN1B      | 0.396068984  | 0           |
| AC079630.4 | GLT1D1     | 0.677698381  | 0           |
| AC079630.4 | PHYHIP     | 0.484496776  | 0           |
| AC079630.4 | BHLHE40    | 0.208470513  | 1.11E-05    |
| AC079630.4 | BID        | 0.336753263  | 5.72E-13    |
| AC079630.4 | POSTN      | 0.012087786  | 0.800534959 |
| AC079630.4 | ITGA3      | 0.125221762  | 0.00866138  |
| AC079630.4 | RSP04      | 0.245769566  | 2.02E-07    |
| AC079630.4 | ADAMTS9    | 0.789253142  | 0           |
| AC079630.4 | ABTB2      | 0.181261897  | 0.000137479 |
| AC079630.4 | KCNQ3      | 0.152402579  | 0.001376093 |
| AC079630.4 | ANXA1      | 0.359965902  | 8.91E-15    |
| AC079630.4 | S100A11    | 0.223118034  | 2.49E-06    |
| AC079630.4 | CEACAM6    | 0.020587889  | 0.667064776 |
| AC079630.4 | IER5L      | 0.289465614  | 7.67E-10    |
| AC079630.4 | KRT80      | -0.011931056 | 0.803067852 |
| AC079630.4 | CDH6       | 0.130783622  | 0.006097548 |
| AC079630.4 | UNC5B      | 0.297860954  | 2.35E-10    |
| AC079630.4 | PLEKHN1    | 0.315445496  | 1.73E-11    |
| AC079630.4 | SYTL1      | 0.388384957  | 0           |
| AC079630.4 | TMEM163    | 0.172484306  | 0.000288036 |
| AC079630.4 | C4orf48    | 0.444932159  | 0           |
| AC079630.4 | B3GNT7     | 0.598934094  | 0           |
| AC079630.4 | BAIAP3     | 0.472012272  | 0           |
| AC079630.4 | PHLDA2     | 0.298040236  | 2.29E-10    |
| AC079630.4 | GAP43      | 0.272225153  | 6.74E-09    |
| AC079630.4 | S100A1     | 0.196052247  | 3.65E-05    |
| AC079630.4 | PTPRE      | 0.26698755   | 1.52E-08    |
| AC079630.4 | CCND1      | 0.324606615  | 4.15E-12    |
| AC079630.4 | ST6GALNAC5 | -0.036567766 | 0.444717708 |
| AC079630.4 | KRT17      | 0.230341374  | 1.15E-06    |
| AC079630.4 | HPCAL4     | 0.680689584  | 0           |
| AC079630.4 | GABBR2     | 0.490519464  | 0           |
| AC079630.4 | DIRAS3     | 0.612418266  | 0           |
| AC079630.4 | SERINC2    | 0.253655427  | 7.92E-08    |
| AC079630.4 | PTCHD4     | 0.292444052  | 5.06E-10    |
| AC079630.4 | EPS8       | 0.535445241  | 0           |
| AC079630.4 | LY6E       | 0.3007489    | 1.55E-10    |

|            |         |             |             |
|------------|---------|-------------|-------------|
| AC079630.4 | UPP1    | 0.175535364 | 0.00022361  |
| AC079630.4 | AHNAK2  | 0.062691445 | 0.189755077 |
| AC079630.4 | PLXNC1  | 0.502575904 | 0           |
| AC079630.4 | TNC     | 0.03531007  | 0.460395248 |
| AC079630.4 | DUSP4   | 0.506622092 | 0           |
| AC079630.4 | NRCAM   | 0.407977771 | 0           |
| AC079630.4 | NRP2    | 0.575681598 | 0           |
| AC079630.4 | CTSC    | 0.294262688 | 3.92E-10    |
| AC079630.4 | AMIG02  | 0.561276477 | 0           |
| AC079630.4 | NAB2    | 0.467264983 | 0           |
| AC079630.4 | TBC1D2  | 0.092674538 | 0.052358019 |
| AC079630.4 | PHLDA3  | 0.190077642 | 6.32E-05    |
| AC079630.4 | PTP4A3  | 0.381010561 | 3.52E-17    |
| AC079630.4 | CRABP2  | 0.405291234 | 0           |
| AC079630.4 | GOS2    | 0.436839216 | 0           |
| AC079630.4 | S100A6  | 0.13423069  | 0.00487364  |
| AC079630.4 | FOXQ1   | 0.178318209 | 0.000176859 |
| AC079630.4 | LRG1    | 0.334504861 | 8.33E-13    |
| AC079630.4 | LAMP5   | 0.220978563 | 3.12E-06    |
| AC079630.4 | ALDH3B1 | 0.132302697 | 0.005527686 |
| AC079630.4 | CDH2    | 0.542556529 | 0           |
| AC079630.4 | SCG5    | 0.647350624 | 0           |
| AC079630.4 | ZCCHC16 | 0.734846536 | 1.06E-75    |
| AC079630.4 | GRB7    | 0.248786725 | 1.41E-07    |
| AC079630.4 | TIAM1   | 0.37520843  | 2.95E-16    |
| AC079630.4 | FXD5    | 0.511989635 | 0           |
| AC079630.4 | CLDN9   | 0.231950232 | 9.63E-07    |
| AC079630.4 | FAM43A  | 0.348903032 | 7.01E-14    |
| AC079630.4 | CHST2   | 0.42980835  | 0           |
| AC079630.4 | HMGA2   | 0.594227371 | 0           |
| AC079630.4 | GALNT7  | 0.523594323 | 0           |
| AC079630.4 | CBLN1   | 0.157648142 | 0.000930321 |
| AC079630.4 | STRA6   | 0.320846087 | 7.51E-12    |
| AC079630.4 | MUC21   | 0.23658732  | 5.32E-07    |
| AC079630.4 | PRR36   | 0.464678867 | 0           |
| AC079630.4 | NFE2L3  | 0.147770178 | 0.00192525  |
| AC079630.4 | NR1D1   | 0.182419571 | 0.000124381 |
| AC079630.4 | MUC1    | -0.06373026 | 0.182510136 |
| AC079630.4 | NAT8L   | 0.700835988 | 0           |
| AC079630.4 | APOC1   | 0.51451391  | 0           |
| AC079630.4 | EVA1A   | 0.12612569  | 0.008188334 |
| AC079630.4 | ENTPD1  | 0.576575314 | 0           |
| AC079630.4 | COL1A1  | 0.137458477 | 0.003933388 |
| AC079630.4 | FNDC4   | 0.286494552 | 1.16E-09    |
| AC079630.4 | FRMD3   | 0.710537648 | 0           |
| AC079630.4 | SHROOM4 | 0.489121943 | 0           |
| AC079630.4 | NELL2   | 0.549461728 | 0           |
| AC079630.4 | EPHB3   | 0.229074626 | 1.32E-06    |
| AC079630.4 | TMC6    | 0.368181818 | 1.63E-15    |
| AC079630.4 | NOD1    | 0.504216392 | 0           |
| AC079630.4 | GGCT    | 0.395426036 | 0           |

|            |           |              |             |
|------------|-----------|--------------|-------------|
| AC079630.4 | ICAM1     | 0.245960762  | 1.97E-07    |
| AC079630.4 | PRSS23    | 0.388907202  | 0           |
| AC079630.4 | CFI       | 0.350641104  | 5.13E-14    |
| AC079630.4 | CD55      | 0.0721395    | 0.131223827 |
| AC079630.4 | RASD2     | 0.346282874  | 1.12E-13    |
| AC079630.4 | KLK11     | 0.330589861  | 1.18E-12    |
| AC079630.4 | ICAM5     | 0.46451703   | 0           |
| AC079630.4 | ADORA1    | 0.348441635  | 7.61E-14    |
| AC079630.4 | ITGA2     | 0.117303279  | 0.013962479 |
| AC079630.4 | ABCC3     | 0.479338443  | 0           |
| AC079630.4 | MFGE8     | 0.344704227  | 1.47E-13    |
| AC079630.4 | STK32A    | 0.481940162  | 0           |
| AC079630.4 | CYSLTR2   | 0.479719985  | 0           |
| AC079630.4 | LAD1      | 0.27665063   | 4.35E-09    |
| AC079630.4 | MGAT3     | 0.01976316   | 0.679531144 |
| AC079630.4 | IGFBP6    | 0.471946317  | 0           |
| AC079630.4 | CYP2S1    | 0.044158154  | 0.355851501 |
| AC079630.4 | KCNJ2     | 0.535946919  | 0           |
| AC079630.4 | FAM20A    | 0.403355725  | 0           |
| AC079630.4 | TGFA      | 0.612113458  | 0           |
| AC079630.4 | MXRA8     | 0.327593279  | 2.57E-12    |
| AC079630.4 | C8orf4    | 0.280719086  | 2.53E-09    |
| AC079630.4 | CLDN10    | 0.299366401  | 1.53E-10    |
| AC079630.4 | PDE5A     | 0.420772615  | 0           |
| AC079630.4 | APOE      | 0.579603821  | 0           |
| AC079630.4 | SPOCK2    | 0.048238099  | 0.313128893 |
| AC079630.4 | TENM1     | 0.826257173  | 0           |
| AC079630.4 | SLIT1     | 0.767281011  | 0           |
| AC079630.4 | CXCL14    | 0.247886769  | 1.57E-07    |
| AC079630.4 | ECM1      | 0.659409475  | 0           |
| AC079630.4 | DUSP5     | 0.154088881  | 0.001214951 |
| AC079630.4 | SEZ6L2    | 0.342551565  | 2.14E-13    |
| AC079630.4 | THRSP     | 0.473515462  | 0           |
| AC079630.4 | C19orf33  | 0.037861011  | 0.428620442 |
| AC079630.4 | MPZL2     | 0.424348329  | 0           |
| AC079630.4 | CTSH      | 0.413645158  | 0           |
| AC079630.4 | CYP1B1    | 0.340158205  | 3.22E-13    |
| AC079630.4 | ALOX5     | -0.002432649 | 0.959449936 |
| AC079630.4 | SYTL5     | 0.350742033  | 3.74E-14    |
| AC079630.4 | TNFRSF12A | 0.305838867  | 7.36E-11    |
| AC079630.4 | DUSP6     | 0.387570387  | 0           |
| AC079630.4 | ALOX15B   | 0.155913332  | 0.001060315 |
| AC079630.4 | SDC4      | 0.464278744  | 0           |
| AC079630.4 | MDK       | 0.42341802   | 0           |
| AC079630.4 | KRT19     | 0.019288148  | 0.686821313 |
| AC079630.4 | MET       | 0.250484657  | 1.16E-07    |
| AC079630.4 | TESC      | 0.738475591  | 0           |
| AC079630.4 | CXCL17    | 0.095465399  | 0.045598924 |
| AC079630.4 | NPC2      | 0.591437576  | 0           |
| AC079630.4 | COMP      | 0.230822627  | 1.09E-06    |
| AC079630.4 | TUSC3     | 0.506193176  | 0           |



|            |          |              |             |
|------------|----------|--------------|-------------|
| AC079630.4 | TMPRSS4  | 0.124947591  | 0.008809599 |
| AC079630.4 | LGALS3   | 0.208256198  | 1.14E-05    |
| AC079630.4 | CRLF1    | 0.079856574  | 0.094697401 |
| AC079630.4 | CTXN1    | 0.267845097  | 1.36E-08    |
| AC079630.4 | PCSK1N   | 0.37654567   | 2.00E-16    |
| AC079630.4 | NMU      | 0.146923715  | 0.002026082 |
| AC079630.4 | GALE     | 0.504577793  | 0           |
| AC079630.4 | PCSK2    | 0.442905307  | 0           |
| AC079630.4 | GJB3     | 0.423235617  | 0           |
| AC079630.4 | SLPI     | -0.000421682 | 0.992968992 |
| AC079630.4 | AGR2     | 0.361564974  | 6.50E-15    |
| AC079630.4 | MRC2     | 0.330874256  | 1.51E-12    |
| AC079630.4 | GOLT1A   | 0.610340494  | 0           |
| AC079630.4 | SLC27A6  | 0.172095536  | 0.000291674 |
| AC079630.4 | KCNN4    | 0.17252246   | 0.000287133 |
| AC079630.4 | ETV4     | 0.453199578  | 1.27E-23    |
| AC079630.4 | SYT12    | 0.385112066  | 0           |
| AC079630.4 | PVRL4    | 0.215975825  | 5.23E-06    |
| AC079630.4 | PLCD3    | 0.252109827  | 9.53E-08    |
| AC079630.4 | PLAU     | 0.244939535  | 2.22E-07    |
| AC079630.4 | LRRK2    | 0.912964056  | 0           |
| AC079630.4 | SFN      | 0.097917831  | 0.040331184 |
| AC079630.4 | LPAR5    | 0.445904737  | 0           |
| AC079630.4 | NGEF     | 0.180180956  | 0.00015087  |
| AC079630.4 | DTX4     | 0.234328699  | 7.40E-07    |
| AC079630.4 | CST6     | 0.290527407  | 6.62E-10    |
| AC079630.4 | QPCT     | 0.602367545  | 0           |
| AC079630.4 | TIMP1    | 0.468999935  | 0           |
| AC079630.4 | CAMK2N1  | 0.487347135  | 0           |
| AC079630.4 | KLHDC8A  | 0.624895821  | 0           |
| AC079630.4 | PDLIM4   | 0.234868957  | 6.97E-07    |
| AC079630.4 | SCEL     | 0.289094143  | 8.08E-10    |
| AC079630.4 | LCN2     | -0.004396384 | 0.926786566 |
| AC079630.4 | PROS1    | 0.185993441  | 9.10E-05    |
| AC079630.4 | GABRB2   | 0.359647336  | 9.49E-15    |
| AC079630.4 | TMPRSS6  | 0.158532496  | 0.000869876 |
| AC079630.4 | KLK7     | 0.162554044  | 0.000628653 |
| AC079630.4 | PDZK1IP1 | 0.266432541  | 1.63E-08    |
| AC079630.4 | CDH3     | 0.475612098  | 0           |
| AC079630.4 | LRP4     | 0.742469016  | 0           |
| AC079630.4 | IGSF1    | 0.414170806  | 0           |
| AC079630.4 | B3GNT3   | -0.015274866 | 0.7495174   |
| AC079630.4 | CLDN1    | 0.244511329  | 2.33E-07    |
| AC079630.4 | GDF15    | 0.075777338  | 0.112837685 |
| AC079630.4 | ARHGAP36 | 0.397674712  | 4.38E-18    |
| AC079630.4 | LAMB3    | 0.236471858  | 5.83E-07    |
| AC079630.4 | KLK10    | 0.256507488  | 5.61E-08    |
| AC079630.4 | DPP4     | 0.250769608  | 1.12E-07    |
| AC079630.4 | METTL7B  | 0.557603747  | 0           |
| AC079630.4 | LIPH     | 0.344574304  | 1.50E-13    |
| AC079630.4 | CLDN16   | 0.244872588  | 2.24E-07    |

|               |           |              |             |
|---------------|-----------|--------------|-------------|
| AC079630.4    | CHI3L1    | 0.273697297  | 6.41E-09    |
| AC079630.4    | SLC22A31  | 0.534235347  | 9.18E-34    |
| AC079630.4    | TACSTD2   | 0.191888476  | 5.36E-05    |
| AC079630.4    | SFTPB     | 0.108236766  | 0.023369627 |
| AC079630.4    | RXRG      | 0.732834445  | 0           |
| AC079630.4    | DCSTAMP   | 0.204791087  | 1.53E-05    |
| AC079630.4    | CITED1    | 0.558593912  | 0           |
| AC079630.4    | SERPINA1  | 0.281285867  | 2.35E-09    |
| AC079630.4    | PRR15     | 0.677268472  | 0           |
| AC079630.4    | SLC34A2   | 0.068587189  | 0.151333939 |
| AC079630.4    | FN1       | 0.075709257  | 0.113162132 |
| AC079630.4    | ZCCHC12   | 0.692428734  | 0           |
| RP11-474021.5 | TFF3      | -0.591937126 | 0           |
| RP11-474021.5 | CCL21     | -0.390566551 | 1.90E-17    |
| RP11-474021.5 | TPO       | -0.603822511 | 0           |
| RP11-474021.5 | MT1G      | -0.541918829 | 0           |
| RP11-474021.5 | DI01      | -0.564345975 | 0           |
| RP11-474021.5 | DPT       | -0.345954573 | 8.69E-14    |
| RP11-474021.5 | CDH16     | -0.556177716 | 0           |
| RP11-474021.5 | CRABP1    | -0.434029305 | 1.36E-21    |
| RP11-474021.5 | SLC26A7   | -0.502836033 | 0           |
| RP11-474021.5 | MT1H      | -0.533282726 | 1.26E-33    |
| RP11-474021.5 | SLC26A4   | -0.550034892 | 0           |
| RP11-474021.5 | SLC5A8    | -0.566071762 | 1.47E-38    |
| RP11-474021.5 | PKHD1L1   | -0.48296773  | 4.90E-27    |
| RP11-474021.5 | TFCP2L1   | -0.508349952 | 0           |
| RP11-474021.5 | WSCD2     | -0.589210045 | 2.20E-42    |
| RP11-474021.5 | IPCEF1    | -0.543614776 | 0           |
| RP11-474021.5 | SLC5A5    | -0.488415829 | 1.07E-27    |
| RP11-474021.5 | MT1F      | -0.573491066 | 0           |
| RP11-474021.5 | FOSB      | -0.349708241 | 6.06E-14    |
| RP11-474021.5 | SEMA3D    | -0.562311128 | 5.78E-38    |
| RP11-474021.5 | BMP8A     | -0.545626594 | 0           |
| RP11-474021.5 | MATN2     | -0.508522426 | 0           |
| RP11-474021.5 | PLA2R1    | -0.461707662 | 0           |
| RP11-474021.5 | COL23A1   | -0.590640026 | 0           |
| RP11-474021.5 | HGD       | -0.696805119 | 0           |
| RP11-474021.5 | TCEAL2    | -0.502509241 | 0           |
| RP11-474021.5 | CHRD1     | -0.32571097  | 2.62E-12    |
| RP11-474021.5 | TNFRSF11B | -0.506478553 | 0           |
| RP11-474021.5 | FAM167A   | -0.630262938 | 0           |
| RP11-474021.5 | KIT       | -0.494237867 | 0           |
| RP11-474021.5 | SLC4A4    | -0.563685723 | 0           |
| RP11-474021.5 | SMOC2     | -0.435161425 | 0           |
| RP11-474021.5 | FHL1      | -0.603504796 | 0           |
| RP11-474021.5 | OTOS      | -0.686717946 | 0           |
| RP11-474021.5 | IGFBPL1   | -0.557250793 | 3.54E-37    |
| RP11-474021.5 | HBB       | -0.327535268 | 2.60E-12    |
| RP11-474021.5 | BEX1      | -0.495380365 | 0           |
| RP11-474021.5 | FABP4     | -0.53433615  | 8.89E-34    |
| RP11-474021.5 | LMOD1     | -0.536739647 | 0           |

|               |            |              |          |
|---------------|------------|--------------|----------|
| RP11-474021.5 | SOD3       | -0.598403056 | 0        |
| RP11-474021.5 | TMEM171    | -0.475905985 | 0        |
| RP11-474021.5 | PI16       | -0.327522502 | 2.60E-12 |
| RP11-474021.5 | ZMAT4      | -0.660281039 | 2.63E-56 |
| RP11-474021.5 | MFAP4      | -0.328218923 | 2.33E-12 |
| RP11-474021.5 | CWH43      | -0.511865332 | 1.09E-30 |
| RP11-474021.5 | SPX        | -0.590483721 | 0        |
| RP11-474021.5 | APOD       | -0.185581546 | 9.43E-05 |
| RP11-474021.5 | DPP6       | -0.571505062 | 0        |
| RP11-474021.5 | MMRN1      | -0.400145809 | 0        |
| RP11-474021.5 | WDR72      | -0.423708502 | 0        |
| RP11-474021.5 | MPPED2     | -0.66701847  | 0        |
| RP11-474021.5 | PAPSS2     | -0.481329127 | 0        |
| RP11-474021.5 | DCN        | -0.202535197 | 1.98E-05 |
| RP11-474021.5 | SORBS2     | -0.60000156  | 0        |
| RP11-474021.5 | EGR2       | -0.259000701 | 4.13E-08 |
| RP11-474021.5 | EDN3       | -0.447408053 | 5.39E-23 |
| RP11-474021.5 | DIO2       | -0.52819013  | 0        |
| RP11-474021.5 | ITPR1      | -0.635112207 | 0        |
| RP11-474021.5 | CFD        | -0.374780365 | 3.32E-16 |
| RP11-474021.5 | CPXM1      | -0.529575453 | 0        |
| RP11-474021.5 | ELMO1      | -0.704852532 | 0        |
| RP11-474021.5 | GPC3       | -0.471558055 | 1.09E-25 |
| RP11-474021.5 | MYOC       | -0.198396462 | 2.83E-05 |
| RP11-474021.5 | DEPTOR     | -0.519100072 | 0        |
| RP11-474021.5 | DGKI       | -0.482682395 | 0        |
| RP11-474021.5 | CARTPT     | -0.536067545 | 5.02E-34 |
| RP11-474021.5 | IYD        | -0.345340083 | 1.32E-13 |
| RP11-474021.5 | LYVE1      | -0.361711634 | 6.31E-15 |
| RP11-474021.5 | CLCNKB     | -0.536129605 | 0        |
| RP11-474021.5 | NCAM1      | -0.499137488 | 0        |
| RP11-474021.5 | HBA2       | -0.359710454 | 9.37E-15 |
| RP11-474021.5 | GLT8D2     | -0.556983351 | 0        |
| RP11-474021.5 | OGDHL      | -0.51913085  | 0        |
| RP11-474021.5 | LIFR       | -0.476098883 | 0        |
| RP11-474021.5 | CSGALNACT1 | -0.287826261 | 9.62E-10 |
| RP11-474021.5 | RAP1GAP    | -0.463469847 | 0        |
| RP11-474021.5 | COL9A3     | -0.586916801 | 0        |
| RP11-474021.5 | FBLN1      | -0.269897338 | 1.05E-08 |
| RP11-474021.5 | EFEMP1     | -0.333177691 | 1.04E-12 |
| RP11-474021.5 | AOX1       | -0.53231612  | 1.72E-33 |
| RP11-474021.5 | GRIN2C     | -0.541340418 | 0        |
| RP11-474021.5 | C11orf74   | -0.630028623 | 0        |
| RP11-474021.5 | PPARGC1A   | -0.556010207 | 0        |
| RP11-474021.5 | ANGPTL1    | -0.513060363 | 0        |
| RP11-474021.5 | SCARA5     | -0.312637578 | 2.08E-11 |
| RP11-474021.5 | LTF        | -0.561501715 | 0        |
| RP11-474021.5 | CA4        | -0.500295908 | 3.49E-29 |
| RP11-474021.5 | TG         | -0.467914739 | 0        |
| RP11-474021.5 | FCGBP      | -0.561929921 | 0        |
| RP11-474021.5 | PBX4       | -0.592392991 | 0        |

|               |          |              |             |
|---------------|----------|--------------|-------------|
| RP11-474021.5 | CYR61    | -0.384435361 | 0           |
| RP11-474021.5 | FOS      | -0.38902365  | 0           |
| RP11-474021.5 | KHDRBS2  | -0.539185202 | 0           |
| RP11-474021.5 | MUM1L1   | -0.478003614 | 0           |
| RP11-474021.5 | RGS16    | -0.572269848 | 0           |
| RP11-474021.5 | MT1M     | -0.491673026 | 0           |
| RP11-474021.5 | LRP2     | -0.44327309  | 0           |
| RP11-474021.5 | MAFB     | -0.540183878 | 0           |
| RP11-474021.5 | KCNK2    | -0.450628906 | 0           |
| RP11-474021.5 | TBC1D4   | -0.551882604 | 0           |
| RP11-474021.5 | MIOX     | -0.630174595 | 5.77E-50    |
| RP11-474021.5 | TPPP     | -0.471153306 | 0           |
| RP11-474021.5 | FMOD     | -0.535644664 | 0           |
| RP11-474021.5 | CITED2   | -0.349582857 | 6.20E-14    |
| RP11-474021.5 | RGS8     | -0.577948317 | 1.75E-40    |
| RP11-474021.5 | ABI3BP   | -0.320153922 | 8.37E-12    |
| RP11-474021.5 | ADH1B    | -0.357780335 | 1.06E-14    |
| RP11-474021.5 | OGN      | -0.276502439 | 3.81E-09    |
| RP11-474021.5 | NR4A1    | -0.339066485 | 3.88E-13    |
| RP11-474021.5 | FOXJ1    | -0.585012087 | 1.15E-41    |
| RP11-474021.5 | ALDH1A1  | -0.536916376 | 0           |
| RP11-474021.5 | OCA2     | -0.423903089 | 1.42E-20    |
| RP11-474021.5 | TMEM139  | -0.354557085 | 2.50E-14    |
| RP11-474021.5 | ARHGAP24 | -0.655918296 | 0           |
| RP11-474021.5 | SLC25A15 | -0.459656697 | 0           |
| RP11-474021.5 | DES      | -0.23875821  | 4.16E-07    |
| RP11-474021.5 | GDF10    | -0.49897972  | 5.13E-29    |
| RP11-474021.5 | KIAA1324 | -0.610389712 | 0           |
| RP11-474021.5 | JUN      | -0.417753896 | 0           |
| RP11-474021.5 | C7       | -0.114832618 | 0.016120036 |
| RP11-474021.5 | LGI3     | -0.630474701 | 0           |
| RP11-474021.5 | CDON     | -0.618772286 | 0           |
| RP11-474021.5 | BCL2     | -0.44935223  | 0           |
| RP11-474021.5 | HLF      | -0.583676816 | 0           |
| RP11-474021.5 | EGR1     | -0.341447221 | 2.58E-13    |
| RP11-474021.5 | IP6K3    | -0.469123333 | 0           |
| RP11-474021.5 | SCUBE3   | -0.464856588 | 0           |
| RP11-474021.5 | PKNOX2   | -0.546074374 | 0           |
| RP11-474021.5 | SMAD9    | -0.285934863 | 1.25E-09    |
| RP11-474021.5 | IQGAP2   | -0.488969184 | 0           |
| RP11-474021.5 | GNA14    | -0.610009446 | 0           |
| RP11-474021.5 | LAYN     | -0.548022365 | 0           |
| RP11-474021.5 | AVPR1A   | -0.557410848 | 0           |
| RP11-474021.5 | PDLIM3   | -0.544586928 | 0           |
| RP11-474021.5 | GPM6A    | -0.434025877 | 0           |
| RP11-474021.5 | SDPR     | -0.312385502 | 2.76E-11    |
| RP11-474021.5 | CRYAB    | -0.253147082 | 8.42E-08    |
| RP11-474021.5 | FOXA2    | -0.480126876 | 1.07E-26    |
| RP11-474021.5 | C8orf88  | -0.437793638 | 0           |
| RP11-474021.5 | ISM1     | -0.517852898 | 0           |
| RP11-474021.5 | BMP2     | -0.267813183 | 1.37E-08    |

|               |          |              |          |
|---------------|----------|--------------|----------|
| RP11-474021.5 | ID4      | -0.485887205 | 0        |
| RP11-474021.5 | NUPR1    | -0.408893188 | 0        |
| RP11-474021.5 | SERTM1   | -0.455286263 | 7.52E-24 |
| RP11-474021.5 | IRS1     | -0.560166176 | 0        |
| RP11-474021.5 | FIBIN    | -0.341200992 | 2.69E-13 |
| RP11-474021.5 | PODN     | -0.249054656 | 1.37E-07 |
| RP11-474021.5 | TDRD9    | -0.367535325 | 1.88E-15 |
| RP11-474021.5 | EPHA3    | -0.385126533 | 0        |
| RP11-474021.5 | AIF1L    | -0.251053424 | 1.08E-07 |
| RP11-474021.5 | EBF4     | -0.647763087 | 0        |
| RP11-474021.5 | ADM2     | -0.548977212 | 0        |
| RP11-474021.5 | GSTM3    | -0.563474244 | 0        |
| RP11-474021.5 | HSD17B6  | -0.230117129 | 1.18E-06 |
| RP11-474021.5 | AGR3     | -0.312184823 | 2.23E-11 |
| RP11-474021.5 | EPHB1    | -0.425646423 | 0        |
| RP11-474021.5 | TMOD1    | -0.41190127  | 0        |
| RP11-474021.5 | WASF3    | -0.49714028  | 0        |
| RP11-474021.5 | SELV     | -0.585466805 | 9.62E-42 |
| RP11-474021.5 | ENPP1    | -0.233539943 | 8.08E-07 |
| RP11-474021.5 | SYNE1    | -0.572226608 | 1.52E-39 |
| RP11-474021.5 | PLCH1    | -0.580498245 | 0        |
| RP11-474021.5 | CCDC146  | -0.58223646  | 0        |
| RP11-474021.5 | SLC16A2  | -0.632833878 | 0        |
| RP11-474021.5 | IER2     | -0.55824712  | 0        |
| RP11-474021.5 | KCNAB1   | -0.572238927 | 0        |
| RP11-474021.5 | SYNDIG1  | -0.586595682 | 0        |
| RP11-474021.5 | C16orf89 | -0.594596005 | 0        |
| RP11-474021.5 | CTGF     | -0.193091539 | 4.80E-05 |
| RP11-474021.5 | NR4A3    | -0.235416022 | 6.56E-07 |
| RP11-474021.5 | KIAA1456 | -0.458974886 | 0        |
| RP11-474021.5 | AQP4     | -0.511516182 | 0        |
| RP11-474021.5 | RNF150   | -0.608148543 | 0        |
| RP11-474021.5 | C1S      | -0.192409586 | 5.11E-05 |
| RP11-474021.5 | PFKFB2   | -0.386803048 | 0        |
| RP11-474021.5 | PROX1    | -0.513547574 | 0        |
| RP11-474021.5 | TCF7L1   | -0.699603707 | 0        |
| RP11-474021.5 | HSPB6    | -0.381560606 | 2.51E-17 |
| RP11-474021.5 | FHDC1    | -0.361857584 | 6.13E-15 |
| RP11-474021.5 | PRR15L   | -0.482827353 | 0        |
| RP11-474021.5 | SLC1A1   | -0.367279025 | 1.99E-15 |
| RP11-474021.5 | BTBD11   | -0.635129937 | 0        |
| RP11-474021.5 | TRIM58   | -0.366653807 | 2.28E-15 |
| RP11-474021.5 | LRIG1    | -0.431187148 | 0        |
| RP11-474021.5 | ROR2     | -0.398159521 | 0        |
| RP11-474021.5 | GPR125   | -0.510938763 | 0        |
| RP11-474021.5 | FLRT1    | -0.661912617 | 0        |
| RP11-474021.5 | PGF      | -0.607135117 | 0        |
| RP11-474021.5 | DUSP1    | -0.303394304 | 1.05E-10 |
| RP11-474021.5 | PLA2G7   | -0.408169535 | 0        |
| RP11-474021.5 | PLSCR4   | -0.315921076 | 1.61E-11 |
| RP11-474021.5 | FAM46B   | -0.408322861 | 0        |

|               |          |              |             |
|---------------|----------|--------------|-------------|
| RP11-474021.5 | GLDC     | -0.494082839 | 0           |
| RP11-474021.5 | ZBTB16   | -0.295630423 | 3.23E-10    |
| RP11-474021.5 | OMD      | -0.204344319 | 1.60E-05    |
| RP11-474021.5 | HSD11B2  | -0.612125656 | 0           |
| RP11-474021.5 | FGL2     | -0.260356238 | 3.49E-08    |
| RP11-474021.5 | CLCNKA   | -0.662259503 | 9.49E-57    |
| RP11-474021.5 | GATM     | -0.399013665 | 0           |
| RP11-474021.5 | TNS3     | -0.350257293 | 5.49E-14    |
| RP11-474021.5 | TOB1     | -0.371096855 | 8.41E-16    |
| RP11-474021.5 | MARC2    | -0.569002062 | 0           |
| RP11-474021.5 | LRRC2    | -0.353868324 | 2.84E-14    |
| RP11-474021.5 | SORD     | -0.257827849 | 4.77E-08    |
| RP11-474021.5 | RIMS4    | -0.480269179 | 0           |
| RP11-474021.5 | SLC29A4  | -0.60973953  | 0           |
| RP11-474021.5 | SLC39A14 | -0.512807467 | 0           |
| RP11-474021.5 | FAXDC2   | -0.480587036 | 0           |
| RP11-474021.5 | HSPB8    | -0.305203295 | 8.08E-11    |
| RP11-474021.5 | CCL19    | -0.079567969 | 0.095908444 |
| RP11-474021.5 | KCNIP3   | -0.594841384 | 0           |
| RP11-474021.5 | CGNL1    | -0.419790535 | 0           |
| RP11-474021.5 | ATF3     | -0.128588125 | 0.007014519 |
| RP11-474021.5 | SGCD     | -0.302710508 | 1.16E-10    |
| RP11-474021.5 | STARD13  | -0.405274923 | 0           |
| RP11-474021.5 | LDHD     | -0.587761441 | 0           |
| RP11-474021.5 | RCAN1    | -0.326980543 | 2.84E-12    |
| RP11-474021.5 | ID3      | -0.44937081  | 0           |
| RP11-474021.5 | SYTL3    | -0.518822071 | 0           |
| RP11-474021.5 | MT1E     | -0.430836527 | 0           |
| RP11-474021.5 | CAMK1D   | -0.545800912 | 0           |
| RP11-474021.5 | PRKCQ    | -0.498080518 | 0           |
| RP11-474021.5 | NUAK2    | -0.449951917 | 0           |
| RP11-474021.5 | LIPG     | -0.418299543 | 0           |
| RP11-474021.5 | SLC25A25 | -0.255341303 | 6.46E-08    |
| RP11-474021.5 | PRKX     | -0.15900609  | 0.00083902  |
| RP11-474021.5 | SRPX     | -0.300144532 | 1.69E-10    |
| RP11-474021.5 | FAM189A1 | -0.609114738 | 0           |
| RP11-474021.5 | PLEKHH1  | -0.347564089 | 8.89E-14    |
| RP11-474021.5 | WNT11    | -0.534839171 | 0           |
| RP11-474021.5 | SNAI1    | -0.422837764 | 0           |
| RP11-474021.5 | FDCSP    | -0.121694976 | 0.010710199 |
| RP11-474021.5 | MT1X     | -0.437457201 | 0           |
| RP11-474021.5 | ACACB    | -0.546365565 | 0           |
| RP11-474021.5 | ARC      | -0.150501111 | 0.001581239 |
| RP11-474021.5 | KLK4     | -0.248414071 | 1.34E-07    |
| RP11-474021.5 | ZFPM2    | -0.372875776 | 5.45E-16    |
| RP11-474021.5 | AKAP12   | -0.210697073 | 8.92E-06    |
| RP11-474021.5 | GJB6     | -0.342946346 | 1.46E-13    |
| RP11-474021.5 | ERO1LB   | -0.469150424 | 0           |
| RP11-474021.5 | DNALI1   | -0.587531523 | 0           |
| RP11-474021.5 | HKDC1    | -0.445572838 | 0           |
| RP11-474021.5 | ZFP36L2  | -0.363453819 | 4.44E-15    |

|               |          |              |             |
|---------------|----------|--------------|-------------|
| RP11-474021.5 | CAPSL    | -0.688910184 | 4.67E-63    |
| RP11-474021.5 | CYP7B1   | -0.42925561  | 0           |
| RP11-474021.5 | CPQ      | -0.397187653 | 0           |
| RP11-474021.5 | RPS6KA6  | -0.51773044  | 1.80E-31    |
| RP11-474021.5 | TLE1     | -0.52051901  | 0           |
| RP11-474021.5 | TP53INP2 | -0.532572188 | 0           |
| RP11-474021.5 | KATNAL2  | -0.639519087 | 0           |
| RP11-474021.5 | SGPP2    | -0.27907264  | 3.15E-09    |
| RP11-474021.5 | CTH      | -0.444466508 | 0           |
| RP11-474021.5 | KIF12    | -0.313253403 | 2.42E-11    |
| RP11-474021.5 | TMEM220  | -0.526867924 | 0           |
| RP11-474021.5 | CENPJ    | -0.428518341 | 0           |
| RP11-474021.5 | FAM155B  | -0.518281104 | 0           |
| RP11-474021.5 | WFS1     | -0.581456923 | 0           |
| RP11-474021.5 | SELENBP1 | -0.598175691 | 0           |
| RP11-474021.5 | SNTA1    | -0.510039516 | 0           |
| RP11-474021.5 | FRAS1    | -0.102073801 | 0.032540725 |
| RP11-474021.5 | FBLN7    | -0.541585796 | 0           |
| RP11-474021.5 | AGPAT9   | -0.374017991 | 4.07E-16    |
| RP11-474021.5 | GPR83    | -0.399212662 | 0           |
| RP11-474021.5 | PRTG     | -0.344498705 | 1.52E-13    |
| RP11-474021.5 | EGR3     | -0.225783012 | 1.88E-06    |
| RP11-474021.5 | GRAMD2   | -0.320689782 | 7.70E-12    |
| RP11-474021.5 | HYOU1    | -0.532069092 | 0           |
| RP11-474021.5 | FBLN5    | -0.346308121 | 1.11E-13    |
| RP11-474021.5 | ITM2A    | -0.472734365 | 0           |
| RP11-474021.5 | SRF      | -0.448842325 | 0           |
| RP11-474021.5 | FGFR2    | -0.236864889 | 5.58E-07    |
| RP11-474021.5 | MT1A     | -0.315657554 | 1.30E-11    |
| RP11-474021.5 | MAMDC2   | -0.237760732 | 5.04E-07    |
| RP11-474021.5 | FHL2     | -0.505238187 | 0           |
| RP11-474021.5 | FTCDNL1  | -0.431056233 | 0           |
| RP11-474021.5 | PKIA     | -0.351738923 | 4.20E-14    |
| RP11-474021.5 | DNAJB4   | -0.253653725 | 7.92E-08    |
| RP11-474021.5 | SLC25A33 | -0.642396253 | 0           |
| RP11-474021.5 | EYA2     | -0.327686608 | 2.54E-12    |
| RP11-474021.5 | LPAR1    | -0.325333246 | 3.70E-12    |
| RP11-474021.5 | STX11    | -0.175238641 | 0.000229226 |
| RP11-474021.5 | ARHGEF28 | -0.365486487 | 2.92E-15    |
| RP11-474021.5 | OR2W3    | -0.447470477 | 0           |
| RP11-474021.5 | ALDH1B1  | -0.552139704 | 2.14E-36    |
| RP11-474021.5 | CXCL12   | -0.297455726 | 2.49E-10    |
| RP11-474021.5 | OLFM2    | -0.587984977 | 0           |
| RP11-474021.5 | TUB      | -0.267455612 | 1.43E-08    |
| RP11-474021.5 | HTRA3    | -0.295642763 | 3.22E-10    |
| RP11-474021.5 | CKB      | -0.588608918 | 0           |
| RP11-474021.5 | RGS2     | -0.216473957 | 4.97E-06    |
| RP11-474021.5 | SHANK2   | -0.472914781 | 0           |
| RP11-474021.5 | CNTFR    | -0.568335235 | 6.42E-39    |
| RP11-474021.5 | CYTH3    | -0.478943569 | 0           |
| RP11-474021.5 | PLAC9    | -0.464040599 | 0           |

|               |          |              |             |
|---------------|----------|--------------|-------------|
| RP11-474021.5 | WVOX     | -0.597929603 | 0           |
| RP11-474021.5 | NPR3     | -0.371805473 | 7.09E-16    |
| RP11-474021.5 | SDC2     | -0.20934111  | 1.02E-05    |
| RP11-474021.5 | KLF15    | -0.426197602 | 0           |
| RP11-474021.5 | TMEM164  | -0.564448807 | 0           |
| RP11-474021.5 | LONRF3   | -0.067193923 | 0.159831645 |
| RP11-474021.5 | GBP1     | -0.228340477 | 1.43E-06    |
| RP11-474021.5 | ARHGAP6  | -0.282891038 | 1.89E-09    |
| RP11-474021.5 | TMEM119  | -0.239157828 | 4.31E-07    |
| RP11-474021.5 | SH3RF1   | -0.296031539 | 3.05E-10    |
| RP11-474021.5 | CRELD2   | -0.655774899 | 0           |
| RP11-474021.5 | PCP4     | -0.138408077 | 0.003689914 |
| RP11-474021.5 | GCSH     | -0.598583473 | 0           |
| RP11-474021.5 | IMPA2    | -0.397561252 | 0           |
| RP11-474021.5 | C1R      | -0.211565258 | 8.18E-06    |
| RP11-474021.5 | SUCNR1   | -0.3881705   | 0           |
| RP11-474021.5 | SFRP1    | -0.447084112 | 0           |
| RP11-474021.5 | UGT8     | -0.485605517 | 0           |
| RP11-474021.5 | TLE4     | -0.277719798 | 3.78E-09    |
| RP11-474021.5 | ANTXR1   | -0.414967789 | 0           |
| RP11-474021.5 | GPX3     | -0.406498268 | 0           |
| RP11-474021.5 | DPY19L2  | -0.506861513 | 0           |
| RP11-474021.5 | FAM46C   | -0.456311752 | 0           |
| RP11-474021.5 | IL33     | -0.269748986 | 9.33E-09    |
| RP11-474021.5 | PEG3     | -0.437016087 | 0           |
| RP11-474021.5 | FAHD2A   | -0.585090648 | 0           |
| RP11-474021.5 | PTGDS    | -0.123291926 | 0.009753654 |
| RP11-474021.5 | CHCHD10  | -0.555637033 | 0           |
| RP11-474021.5 | CD36     | -0.546463291 | 0           |
| RP11-474021.5 | ANKRD37  | -0.535968904 | 0           |
| RP11-474021.5 | TSPAN33  | -0.625836343 | 0           |
| RP11-474021.5 | PRDM16   | -0.439098398 | 0           |
| RP11-474021.5 | UST      | -0.498705311 | 0           |
| RP11-474021.5 | NEXN     | -0.474385349 | 0           |
| RP11-474021.5 | NUPR1L   | -0.314415941 | 1.58E-11    |
| RP11-474021.5 | SLC24A3  | -0.615819946 | 0           |
| RP11-474021.5 | MARC1    | -0.57276103  | 0           |
| RP11-474021.5 | MYH11    | -0.22860089  | 1.39E-06    |
| RP11-474021.5 | APOA1    | -0.58043678  | 6.76E-41    |
| RP11-474021.5 | TMEM178B | -0.40212316  | 0           |
| RP11-474021.5 | CAPN6    | -0.27898419  | 2.73E-09    |
| RP11-474021.5 | PPM1L    | -0.577431301 | 0           |
| RP11-474021.5 | FZD8     | -0.613059796 | 0           |
| RP11-474021.5 | RCAN2    | -0.582917278 | 0           |
| RP11-474021.5 | COPZ2    | -0.641417719 | 0           |
| RP11-474021.5 | GAS1     | -0.319188153 | 9.73E-12    |
| RP11-474021.5 | DACT1    | -0.435182275 | 0           |
| RP11-474021.5 | WBSCR17  | -0.507521339 | 0           |
| RP11-474021.5 | NCS1     | -0.340520173 | 3.03E-13    |
| RP11-474021.5 | SPIRE2   | -0.462524786 | 0           |
| RP11-474021.5 | C15orf52 | -0.447396721 | 0           |



|               |          |              |             |
|---------------|----------|--------------|-------------|
| RP11-474021.5 | SPAG5    | -0.524611437 | 0           |
| RP11-474021.5 | ARL4D    | -0.606447349 | 0           |
| RP11-474021.5 | FAM189A2 | -0.342201653 | 2.27E-13    |
| RP11-474021.5 | MAP1LC3A | -0.672702735 | 0           |
| RP11-474021.5 | KLF6     | 0.012906895  | 0.787332031 |
| RP11-474021.5 | ADD3     | -0.260955642 | 3.24E-08    |
| RP11-474021.5 | TSPAN7   | -0.448734529 | 0           |
| RP11-474021.5 | KLF9     | -0.289254135 | 7.90E-10    |
| RP11-474021.5 | KCNQ1    | -0.581873356 | 0           |
| RP11-474021.5 | MAN1A1   | -0.202555763 | 1.98E-05    |
| RP11-474021.5 | MLF1     | -0.299406128 | 1.88E-10    |
| RP11-474021.5 | RARB     | -0.531426144 | 0           |
| RP11-474021.5 | CDC42EP2 | -0.536885313 | 0           |
| RP11-474021.5 | FAM3B    | -0.173196328 | 0.000271611 |
| RP11-474021.5 | GADD45B  | -0.257849692 | 4.76E-08    |
| RP11-474021.5 | TMEM47   | -0.489323635 | 0           |
| RP11-474021.5 | SDF2L1   | -0.614911763 | 0           |
| RP11-474021.5 | CCDC85A  | -0.147678268 | 0.001937939 |
| RP11-474021.5 | CRYBG3   | -0.017916866 | 0.70802831  |
| RP11-474021.5 | FBLN2    | -0.10525464  | 0.027482265 |
| RP11-474021.5 | PEBP4    | -0.353169067 | 3.23E-14    |
| RP11-474021.5 | CDADC1   | -0.611339028 | 0           |
| RP11-474021.5 | FAM63A   | -0.454481202 | 0           |
| RP11-474021.5 | GLUL     | -0.256675281 | 5.49E-08    |
| RP11-474021.5 | FREM2    | -0.313398928 | 2.37E-11    |
| RP11-474021.5 | ACKR3    | -0.519980171 | 0           |
| RP11-474021.5 | DENND6A  | -0.52359333  | 0           |
| RP11-474021.5 | CLDN8    | -0.049918727 | 0.296553034 |
| RP11-474021.5 | UTS2R    | -0.064414575 | 0.177920118 |
| RP11-474021.5 | SCNN1B   | -0.377254572 | 1.61E-16    |
| RP11-474021.5 | TTC30A   | -0.495794387 | 0           |
| RP11-474021.5 | CORO2B   | -0.610550839 | 0           |
| RP11-474021.5 | TC2N     | -0.297916129 | 2.33E-10    |
| RP11-474021.5 | ALDH2    | -0.727080963 | 0           |
| RP11-474021.5 | GPR183   | -0.116582605 | 0.0145639   |
| RP11-474021.5 | C4orf47  | -0.566096387 | 0           |
| RP11-474021.5 | SLC25A42 | -0.591604802 | 0           |
| RP11-474021.5 | LGMN     | -0.535182133 | 0           |
| RP11-474021.5 | ACSF2    | -0.64967264  | 0           |
| RP11-474021.5 | KIAA1467 | -0.46253046  | 0           |
| RP11-474021.5 | PRKG1    | -0.573672759 | 0           |
| RP11-474021.5 | GNAI1    | -0.580472857 | 0           |
| RP11-474021.5 | ABCC4    | -0.378457209 | 1.07E-16    |
| RP11-474021.5 | PRPS1    | -0.576899554 | 0           |
| RP11-474021.5 | TSPAN5   | -0.289138822 | 8.03E-10    |
| RP11-474021.5 | CR2      | -0.212913166 | 6.80E-06    |
| RP11-474021.5 | CCDC170  | -0.34289169  | 2.01E-13    |
| RP11-474021.5 | RRAD     | -0.156519827 | 0.001013074 |
| RP11-474021.5 | SCGB2A1  | -0.530450021 | 0           |
| RP11-474021.5 | SESN3    | -0.297064964 | 2.63E-10    |
| RP11-474021.5 | SGK223   | -0.218373015 | 4.09E-06    |

|               |          |              |             |
|---------------|----------|--------------|-------------|
| RP11-474021.5 | NDRG2    | -0.67487341  | 0           |
| RP11-474021.5 | C3orf52  | -0.29259057  | 4.96E-10    |
| RP11-474021.5 | FLRT3    | 0.442371857  | 0           |
| RP11-474021.5 | MST1R    | 0.585593177  | 0           |
| RP11-474021.5 | SDC1     | 0.305169112  | 8.12E-11    |
| RP11-474021.5 | ST8SIA4  | 0.469962158  | 0           |
| RP11-474021.5 | UBTD1    | 0.301105053  | 1.47E-10    |
| RP11-474021.5 | EPHA2    | 0.44151814   | 0           |
| RP11-474021.5 | TMEM130  | 0.343195647  | 1.91E-13    |
| RP11-474021.5 | SPINK2   | 0.355300879  | 2.18E-14    |
| RP11-474021.5 | MMP16    | 0.644388781  | 0           |
| RP11-474021.5 | SIGLEC15 | 0.547458846  | 0           |
| RP11-474021.5 | RIN1     | 0.449127276  | 0           |
| RP11-474021.5 | IL1RN    | 0.492264345  | 0           |
| RP11-474021.5 | FCER1G   | 0.151135548  | 0.001509861 |
| RP11-474021.5 | CD276    | 0.502011392  | 0           |
| RP11-474021.5 | CTSB     | 0.466577782  | 0           |
| RP11-474021.5 | FAM171A2 | 0.241603384  | 3.26E-07    |
| RP11-474021.5 | ASPHD1   | 0.519957761  | 0           |
| RP11-474021.5 | C15orf48 | 0.327124507  | 2.78E-12    |
| RP11-474021.5 | DYSF     | 0.16199857   | 0.000666314 |
| RP11-474021.5 | PDZRN4   | 0.199286276  | 2.70E-05    |
| RP11-474021.5 | EFHD2    | 0.161916447  | 0.000670577 |
| RP11-474021.5 | ASF1B    | 0.302458605  | 1.21E-10    |
| RP11-474021.5 | AQP1     | 0.13732898   | 0.003967694 |
| RP11-474021.5 | ARRDC2   | 0.52190561   | 0           |
| RP11-474021.5 | PRSS1    | 0.371202293  | 8.65E-16    |
| RP11-474021.5 | MAPK13   | 0.599100327  | 0           |
| RP11-474021.5 | CST5     | 0.586320204  | 6.89E-42    |
| RP11-474021.5 | AHR      | 0.569762167  | 0           |
| RP11-474021.5 | BAX      | 0.274765614  | 5.57E-09    |
| RP11-474021.5 | C1orf115 | 0.477686041  | 0           |
| RP11-474021.5 | PLK3     | 0.394837696  | 0           |
| RP11-474021.5 | JAG2     | 0.265424646  | 1.85E-08    |
| RP11-474021.5 | RAD23B   | 0.708427111  | 0           |
| RP11-474021.5 | CA12     | -0.131055382 | 0.005991878 |
| RP11-474021.5 | ADTRP    | 0.490482587  | 0           |
| RP11-474021.5 | UCP2     | 0.457791539  | 0           |
| RP11-474021.5 | IGFBP2   | 0.248230865  | 1.51E-07    |
| RP11-474021.5 | LOXL2    | 0.1515395    | 0.001465969 |
| RP11-474021.5 | GPX1     | 0.227486334  | 1.56E-06    |
| RP11-474021.5 | P3H3     | 0.332373332  | 1.18E-12    |
| RP11-474021.5 | C2orf81  | 0.375811947  | 2.49E-16    |
| RP11-474021.5 | CDT1     | 0.438656434  | 0           |
| RP11-474021.5 | SNX25    | 0.446294505  | 0           |
| RP11-474021.5 | MTHFD1L  | 0.615594851  | 0           |
| RP11-474021.5 | CDC42BPG | 0.686824277  | 1.54E-62    |
| RP11-474021.5 | MSN      | 0.707844728  | 0           |
| RP11-474021.5 | SIGLEC6  | 0.56204144   | 6.38E-38    |
| RP11-474021.5 | F2R      | 0.245170588  | 2.16E-07    |
| RP11-474021.5 | TMEM184A | 0.563184612  | 0           |

|               |          |             |             |
|---------------|----------|-------------|-------------|
| RP11-474021.5 | CKS2     | 0.205304425 | 1.52E-05    |
| RP11-474021.5 | TAX1BP3  | 0.414420723 | 0           |
| RP11-474021.5 | PMEPA1   | 0.378255375 | 1.15E-16    |
| RP11-474021.5 | CXCL16   | 0.502174931 | 0           |
| RP11-474021.5 | FAXC     | 0.660842739 | 0           |
| RP11-474021.5 | VTCN1    | 0.572370071 | 1.44E-39    |
| RP11-474021.5 | SH2D4A   | 0.618170046 | 0           |
| RP11-474021.5 | RNF24    | 0.528595217 | 0           |
| RP11-474021.5 | LY6G6C   | 0.606646987 | 1.78E-45    |
| RP11-474021.5 | NID1     | 0.361681848 | 6.35E-15    |
| RP11-474021.5 | STAC     | 0.623740841 | 0           |
| RP11-474021.5 | RAB34    | 0.486820352 | 0           |
| RP11-474021.5 | HES4     | 0.224595977 | 2.13E-06    |
| RP11-474021.5 | EPHA10   | 0.626877569 | 0           |
| RP11-474021.5 | ENTPD2   | 0.487520886 | 0           |
| RP11-474021.5 | DDB2     | 0.518866041 | 0           |
| RP11-474021.5 | NKAIN4   | 0.266651537 | 1.59E-08    |
| RP11-474021.5 | TRIM29   | 0.563885146 | 0           |
| RP11-474021.5 | ADCY8    | 0.570452432 | 2.93E-39    |
| RP11-474021.5 | SFTA2    | 0.457558501 | 0           |
| RP11-474021.5 | NRIP1    | 0.609047507 | 0           |
| RP11-474021.5 | VWA1     | 0.028902294 | 0.545719285 |
| RP11-474021.5 | APLNR    | 0.162389332 | 0.000646373 |
| RP11-474021.5 | REN      | 0.514937092 | 4.27E-31    |
| RP11-474021.5 | EDIL3    | 0.15558583  | 0.001086661 |
| RP11-474021.5 | AGRN     | 0.532056043 | 0           |
| RP11-474021.5 | TREM1    | 0.349323579 | 6.50E-14    |
| RP11-474021.5 | SRL      | 0.41669111  | 0           |
| RP11-474021.5 | RASGRF1  | 0.636529018 | 0           |
| RP11-474021.5 | RMI2     | 0.411927368 | 0           |
| RP11-474021.5 | SAMD1    | 0.33283019  | 1.10E-12    |
| RP11-474021.5 | MGAT4B   | 0.658504696 | 0           |
| RP11-474021.5 | NXN      | 0.584231966 | 0           |
| RP11-474021.5 | SH3BGRL3 | 0.288168372 | 9.18E-10    |
| RP11-474021.5 | CA11     | 0.263450415 | 2.38E-08    |
| RP11-474021.5 | PLD3     | 0.229749771 | 1.22E-06    |
| RP11-474021.5 | LURAP1L  | 0.484489401 | 0           |
| RP11-474021.5 | CARNS1   | 0.436516962 | 0           |
| RP11-474021.5 | PDLIM7   | 0.237793355 | 5.03E-07    |
| RP11-474021.5 | BCL2L1   | 0.566660757 | 0           |
| RP11-474021.5 | GGT6     | 0.417451499 | 0           |
| RP11-474021.5 | DPYSL3   | 0.390125866 | 0           |
| RP11-474021.5 | FYN      | 0.546275357 | 0           |
| RP11-474021.5 | TK1      | 0.213450415 | 6.76E-06    |
| RP11-474021.5 | AK1      | 0.177649021 | 0.00018718  |
| RP11-474021.5 | HIGD1B   | 0.051188453 | 0.284425224 |
| RP11-474021.5 | TMEM59L  | 0.366739476 | 2.24E-15    |
| RP11-474021.5 | MEGF9    | 0.665993413 | 0           |
| RP11-474021.5 | ZFP36L1  | 0.513945994 | 0           |
| RP11-474021.5 | ADRA1B   | 0.392491993 | 0           |
| RP11-474021.5 | EPHA4    | 0.642996224 | 0           |

|               |          |             |             |
|---------------|----------|-------------|-------------|
| RP11-474021.5 | TCERG1L  | 0.455210954 | 0           |
| RP11-474021.5 | NGFR     | 0.334601168 | 8.19E-13    |
| RP11-474021.5 | EBI3     | 0.431716485 | 0           |
| RP11-474021.5 | S100A10  | 0.361561712 | 6.51E-15    |
| RP11-474021.5 | S100B    | 0.323587231 | 4.88E-12    |
| RP11-474021.5 | CD44     | 0.252213652 | 9.42E-08    |
| RP11-474021.5 | BHLHE41  | 0.620749779 | 0           |
| RP11-474021.5 | FBXO2    | 0.300058437 | 1.71E-10    |
| RP11-474021.5 | SLC30A2  | 0.503312606 | 0           |
| RP11-474021.5 | FRMD5    | 0.533016422 | 0           |
| RP11-474021.5 | SAMD11   | 0.426430215 | 0           |
| RP11-474021.5 | SIPA1L2  | 0.536711137 | 0           |
| RP11-474021.5 | S100A16  | 0.434466139 | 0           |
| RP11-474021.5 | PPL      | 0.753876551 | 0           |
| RP11-474021.5 | ARHGDIB  | 0.169978895 | 0.000353504 |
| RP11-474021.5 | CDC42EP3 | 0.550461538 | 0           |
| RP11-474021.5 | RUNX2    | 0.469736779 | 0           |
| RP11-474021.5 | LAMC2    | 0.576715307 | 0           |
| RP11-474021.5 | BRINP1   | 0.44064882  | 0           |
| RP11-474021.5 | GPRC5B   | 0.669739048 | 0           |
| RP11-474021.5 | AQP5     | 0.197717982 | 3.13E-05    |
| RP11-474021.5 | PLAG1    | 0.507695941 | 0           |
| RP11-474021.5 | PTPRU    | 0.595759637 | 0           |
| RP11-474021.5 | ANGPTL4  | 0.362715415 | 5.16E-15    |
| RP11-474021.5 | PALM3    | 0.494612175 | 0           |
| RP11-474021.5 | ACP5     | 0.312421387 | 2.75E-11    |
| RP11-474021.5 | DLG4     | 0.376120442 | 2.27E-16    |
| RP11-474021.5 | ETNK2    | 0.584386569 | 0           |
| RP11-474021.5 | CD109    | 0.641262691 | 0           |
| RP11-474021.5 | SNX22    | 0.407136252 | 0           |
| RP11-474021.5 | TMEM98   | 0.632724805 | 0           |
| RP11-474021.5 | CTHRC1   | 0.274597679 | 5.70E-09    |
| RP11-474021.5 | S100A2   | 0.431191545 | 0           |
| RP11-474021.5 | C11orf80 | 0.583275417 | 0           |
| RP11-474021.5 | SREBF1   | 0.440604567 | 0           |
| RP11-474021.5 | PRSS22   | 0.569199925 | 0           |
| RP11-474021.5 | CMTM3    | 0.28859828  | 8.65E-10    |
| RP11-474021.5 | RDH5     | 0.60041998  | 0           |
| RP11-474021.5 | MYH10    | 0.546505275 | 0           |
| RP11-474021.5 | EVPL     | 0.588937697 | 0           |
| RP11-474021.5 | SCD      | 0.430272015 | 0           |
| RP11-474021.5 | CD151    | 0.449502435 | 0           |
| RP11-474021.5 | S100A4   | 0.444326515 | 0           |
| RP11-474021.5 | BNIP1    | 0.476860832 | 0           |
| RP11-474021.5 | MAP3K6   | 0.531511814 | 0           |
| RP11-474021.5 | MANEAL   | 0.435640976 | 0           |
| RP11-474021.5 | CD207    | 0.371964169 | 7.48E-16    |
| RP11-474021.5 | CD1A     | 0.384664129 | 6.25E-17    |
| RP11-474021.5 | C3       | 0.356225232 | 1.83E-14    |
| RP11-474021.5 | NT5E     | 0.525472814 | 0           |
| RP11-474021.5 | CACNG4   | 0.583310013 | 2.23E-41    |

|               |          |             |             |
|---------------|----------|-------------|-------------|
| RP11-474021.5 | FHOD1    | 0.472514801 | 0           |
| RP11-474021.5 | LEMD1    | 0.457292272 | 0           |
| RP11-474021.5 | ATP11A   | 0.40930409  | 0           |
| RP11-474021.5 | PPAP2C   | 0.338723523 | 4.11E-13    |
| RP11-474021.5 | DRAM1    | 0.629844234 | 0           |
| RP11-474021.5 | CDA      | 0.151590278 | 0.001460535 |
| RP11-474021.5 | CCND2    | 0.342957077 | 1.99E-13    |
| RP11-474021.5 | LCN6     | 0.369022074 | 1.31E-15    |
| RP11-474021.5 | CDH4     | 0.520085698 | 0           |
| RP11-474021.5 | MMP11    | 0.388487364 | 0           |
| RP11-474021.5 | B3GAT1   | 0.564931337 | 0           |
| RP11-474021.5 | SPP1     | 0.282010371 | 2.13E-09    |
| RP11-474021.5 | HLA-DQB1 | 0.241286236 | 3.38E-07    |
| RP11-474021.5 | SDC3     | 0.489174565 | 0           |
| RP11-474021.5 | CX3CL1   | 0.398882607 | 0           |
| RP11-474021.5 | SDK1     | 0.441809473 | 0           |
| RP11-474021.5 | DOCK9    | 0.760878624 | 0           |
| RP11-474021.5 | CSF2     | 0.487260962 | 1.48E-27    |
| RP11-474021.5 | GRHL3    | 0.624578673 | 0           |
| RP11-474021.5 | TMEM92   | 0.546696404 | 1.40E-35    |
| RP11-474021.5 | BASP1    | 0.523005415 | 0           |
| RP11-474021.5 | HRH1     | 0.593965256 | 0           |
| RP11-474021.5 | ESM1     | 0.023812469 | 0.618652248 |
| RP11-474021.5 | B4GALNT3 | 0.607029306 | 0           |
| RP11-474021.5 | LMO3     | 0.444263539 | 0           |
| RP11-474021.5 | C9orf16  | 0.373492484 | 4.66E-16    |
| RP11-474021.5 | SEMA3F   | 0.284499755 | 1.52E-09    |
| RP11-474021.5 | PLA2G12B | 0.384684028 | 6.22E-17    |
| RP11-474021.5 | KLK6     | 0.559277215 | 1.72E-37    |
| RP11-474021.5 | ST3GAL5  | 0.428281189 | 0           |
| RP11-474021.5 | FAM132B  | 0.308713339 | 4.80E-11    |
| RP11-474021.5 | CDKN1A   | 0.308298465 | 5.11E-11    |
| RP11-474021.5 | E2F1     | 0.444806775 | 0           |
| RP11-474021.5 | B3GNT8   | 0.31250734  | 2.71E-11    |
| RP11-474021.5 | MTMR11   | 0.530695399 | 0           |
| RP11-474021.5 | MYO1G    | 0.460906424 | 0           |
| RP11-474021.5 | TMSB10   | 0.330327615 | 1.65E-12    |
| RP11-474021.5 | UNC5CL   | 0.531438626 | 0           |
| RP11-474021.5 | ABR      | 0.519424453 | 0           |
| RP11-474021.5 | PLP2     | 0.378190272 | 1.18E-16    |
| RP11-474021.5 | SRCIN1   | 0.478455649 | 0           |
| RP11-474021.5 | PDE9A    | 0.647891166 | 0           |
| RP11-474021.5 | TREM2    | 0.199229541 | 2.71E-05    |
| RP11-474021.5 | KDEL3    | 0.352588811 | 3.60E-14    |
| RP11-474021.5 | PC       | 0.609364513 | 0           |
| RP11-474021.5 | C2CD4A   | 0.579874446 | 0           |
| RP11-474021.5 | PELI1    | 0.535545094 | 0           |
| RP11-474021.5 | SSX1     | 0.396295356 | 0           |
| RP11-474021.5 | MROH6    | 0.540225436 | 0           |
| RP11-474021.5 | ESPN     | 0.519778621 | 0           |
| RP11-474021.5 | BMP1     | 0.399011821 | 0           |

|               |          |             |             |
|---------------|----------|-------------|-------------|
| RP11-474021.5 | TM4SF4   | 0.576678555 | 2.84E-40    |
| RP11-474021.5 | CORO2A   | 0.665912991 | 0           |
| RP11-474021.5 | CD164L2  | 0.422480207 | 1.97E-20    |
| RP11-474021.5 | CTSS     | 0.402477185 | 0           |
| RP11-474021.5 | CLU      | 0.462177994 | 0           |
| RP11-474021.5 | TMSB4X   | 0.379110795 | 8.43E-17    |
| RP11-474021.5 | WNT10A   | 0.522653323 | 3.84E-32    |
| RP11-474021.5 | NAPSA    | 0.457386594 | 0           |
| RP11-474021.5 | PLEKHA4  | 0.621600093 | 0           |
| RP11-474021.5 | SFTPA1   | 0.112221834 | 0.018670831 |
| RP11-474021.5 | C1orf116 | 0.688456869 | 0           |
| RP11-474021.5 | TM4SF1   | 0.518401808 | 0           |
| RP11-474021.5 | SEL1L3   | 0.64337266  | 0           |
| RP11-474021.5 | VASN     | 0.513560055 | 0           |
| RP11-474021.5 | NPTXR    | 0.604898629 | 0           |
| RP11-474021.5 | PDE4C    | 0.573958845 | 0           |
| RP11-474021.5 | CDC42EP1 | 0.547535864 | 0           |
| RP11-474021.5 | ENDOD1   | 0.722870386 | 0           |
| RP11-474021.5 | RYR1     | 0.645768147 | 0           |
| RP11-474021.5 | IL1RAP   | 0.665110335 | 0           |
| RP11-474021.5 | SLC35F2  | 0.712227946 | 3.66E-69    |
| RP11-474021.5 | ISYNA1   | 0.321629879 | 6.64E-12    |
| RP11-474021.5 | HLA-G    | 0.539162792 | 0           |
| RP11-474021.5 | CDKN2B   | 0.465689314 | 0           |
| RP11-474021.5 | ALDH1A3  | 0.531672941 | 0           |
| RP11-474021.5 | CLIP3    | 0.416881172 | 0           |
| RP11-474021.5 | ULBP2    | 0.502740719 | 0           |
| RP11-474021.5 | ETHE1    | 0.599097348 | 0           |
| RP11-474021.5 | XPR1     | 0.470692477 | 0           |
| RP11-474021.5 | SPTBN2   | 0.680473566 | 0           |
| RP11-474021.5 | IVL      | 0.523652447 | 2.80E-32    |
| RP11-474021.5 | MARCO    | 0.418405779 | 0           |
| RP11-474021.5 | PLXND1   | 0.333476258 | 9.87E-13    |
| RP11-474021.5 | EMILIN2  | 0.447963786 | 0           |
| RP11-474021.5 | PLAUR    | 0.4163985   | 0           |
| RP11-474021.5 | CDC42EP5 | 0.490779877 | 0           |
| RP11-474021.5 | TRPC5    | 0.501303759 | 2.59E-29    |
| RP11-474021.5 | TMEM100  | 0.351611412 | 4.30E-14    |
| RP11-474021.5 | QSOX1    | 0.636655821 | 0           |
| RP11-474021.5 | ARHGAP23 | 0.575287149 | 0           |
| RP11-474021.5 | MDF1     | 0.328053115 | 2.39E-12    |
| RP11-474021.5 | FSTL3    | 0.606420258 | 0           |
| RP11-474021.5 | INF2     | 0.558316478 | 0           |
| RP11-474021.5 | TGFBR1   | 0.675468701 | 0           |
| RP11-474021.5 | TGFBI    | 0.187652369 | 7.85E-05    |
| RP11-474021.5 | ERBB3    | 0.753113041 | 0           |
| RP11-474021.5 | CCL18    | 0.380928721 | 3.69E-17    |
| RP11-474021.5 | CCL17    | 0.416209517 | 8.05E-20    |
| RP11-474021.5 | C16orf45 | 0.492695104 | 0           |
| RP11-474021.5 | PRDM1    | 0.447369914 | 0           |
| RP11-474021.5 | TRIM47   | 0.441151774 | 0           |

|               |           |             |             |
|---------------|-----------|-------------|-------------|
| RP11-474021.5 | CNFN      | 0.394980809 | 0           |
| RP11-474021.5 | ARMCX3    | 0.598957923 | 0           |
| RP11-474021.5 | RAMP1     | 0.380726603 | 4.11E-17    |
| RP11-474021.5 | GABRD     | 0.094022132 | 0.049012202 |
| RP11-474021.5 | COL13A1   | 0.299129829 | 1.96E-10    |
| RP11-474021.5 | S100A5    | 0.476116045 | 0           |
| RP11-474021.5 | MISP      | 0.47128408  | 0           |
| RP11-474021.5 | HES6      | 0.322881166 | 5.45E-12    |
| RP11-474021.5 | PSD3      | 0.639623905 | 0           |
| RP11-474021.5 | DOK7      | 0.625092265 | 0           |
| RP11-474021.5 | ZMAT3     | 0.619079364 | 0           |
| RP11-474021.5 | MFAP2     | 0.341741533 | 2.46E-13    |
| RP11-474021.5 | TMEM79    | 0.551117677 | 0           |
| RP11-474021.5 | SLC1A5    | 0.387753357 | 0           |
| RP11-474021.5 | BBC3      | 0.437386424 | 0           |
| RP11-474021.5 | HLA-DQB2  | 0.229679136 | 1.23E-06    |
| RP11-474021.5 | C1QL1     | 0.533080674 | 0           |
| RP11-474021.5 | TMEM215   | 0.285516866 | 1.11E-09    |
| RP11-474021.5 | PNP       | 0.513331556 | 0           |
| RP11-474021.5 | ARNTL     | 0.603526071 | 0           |
| RP11-474021.5 | CLDN2     | 0.366473758 | 2.12E-15    |
| RP11-474021.5 | MVP       | 0.495904027 | 0           |
| RP11-474021.5 | LGALS1    | 0.27955205  | 2.96E-09    |
| RP11-474021.5 | BIRC7     | 0.515548694 | 3.53E-31    |
| RP11-474021.5 | COL8A1    | 0.639060102 | 0           |
| RP11-474021.5 | PERP      | 0.716811388 | 0           |
| RP11-474021.5 | GJA4      | 0.38837588  | 0           |
| RP11-474021.5 | IGFL2     | 0.455626814 | 6.90E-24    |
| RP11-474021.5 | DAPK2     | 0.725527705 | 0           |
| RP11-474021.5 | MAMLD1    | 0.64255426  | 0           |
| RP11-474021.5 | ETV5      | 0.389702057 | 0           |
| RP11-474021.5 | RUNX1     | 0.603238993 | 0           |
| RP11-474021.5 | LONRF2    | 0.508137905 | 0           |
| RP11-474021.5 | SPOCK1    | 0.227290882 | 1.60E-06    |
| RP11-474021.5 | XKRX      | 0.637061333 | 0           |
| RP11-474021.5 | TGFB1     | 0.225492104 | 1.94E-06    |
| RP11-474021.5 | ERP27     | 0.414703688 | 0           |
| RP11-474021.5 | TNFRSF10C | 0.487479327 | 0           |
| RP11-474021.5 | PALM      | 0.641836138 | 0           |
| RP11-474021.5 | TSC22D1   | 0.43838439  | 0           |
| RP11-474021.5 | TGM2      | 0.483367185 | 0           |
| RP11-474021.5 | UBE2QL1   | 0.416162483 | 0           |
| RP11-474021.5 | ECE1      | 0.610353118 | 0           |
| RP11-474021.5 | COL8A2    | 0.629622401 | 0           |
| RP11-474021.5 | HIST3H2A  | 0.499878871 | 0           |
| RP11-474021.5 | TNFRSF21  | 0.531928673 | 0           |
| RP11-474021.5 | SOX4      | 0.560487863 | 0           |
| RP11-474021.5 | ELF3      | 0.623869913 | 0           |
| RP11-474021.5 | TPD52L1   | 0.666674799 | 0           |
| RP11-474021.5 | INHBB     | 0.531504154 | 0           |
| RP11-474021.5 | HPN       | 0.5057132   | 0           |

|               |            |             |             |
|---------------|------------|-------------|-------------|
| RP11-474021.5 | MMP7       | 0.445507626 | 8.60E-23    |
| RP11-474021.5 | RAB27A     | 0.68486924  | 0           |
| RP11-474021.5 | IGF2BP2    | 0.569801598 | 0           |
| RP11-474021.5 | ITGB4      | 0.546536337 | 0           |
| RP11-474021.5 | PPP1R1B    | 0.563483038 | 0           |
| RP11-474021.5 | NPDC1      | 0.251477517 | 1.03E-07    |
| RP11-474021.5 | CCL13      | 0.495268914 | 1.51E-28    |
| RP11-474021.5 | SPINT1     | 0.616342758 | 0           |
| RP11-474021.5 | HEY2       | 0.430578809 | 0           |
| RP11-474021.5 | CST2       | 0.555155496 | 7.43E-37    |
| RP11-474021.5 | ADM        | 0.338126388 | 4.54E-13    |
| RP11-474021.5 | VSTM2L     | 0.400899673 | 0           |
| RP11-474021.5 | FAM84A     | 0.451599497 | 0           |
| RP11-474021.5 | P4HA2      | 0.428355228 | 0           |
| RP11-474021.5 | LPL        | 0.417990764 | 0           |
| RP11-474021.5 | TMEM173    | 0.427775398 | 0           |
| RP11-474021.5 | DHRS3      | 0.75757623  | 0           |
| RP11-474021.5 | SCN1B      | 0.493522866 | 0           |
| RP11-474021.5 | GLT1D1     | 0.40744035  | 0           |
| RP11-474021.5 | PHYHIP     | 0.467980551 | 0           |
| RP11-474021.5 | BHLHE40    | 0.525882723 | 0           |
| RP11-474021.5 | BID        | 0.629163416 | 0           |
| RP11-474021.5 | POSTN      | 0.294991873 | 3.53E-10    |
| RP11-474021.5 | ITGA3      | 0.664326118 | 0           |
| RP11-474021.5 | RSP04      | 0.634728538 | 0           |
| RP11-474021.5 | ADAMTS9    | 0.331872931 | 1.28E-12    |
| RP11-474021.5 | ABTB2      | 0.702997444 | 0           |
| RP11-474021.5 | KCNQ3      | 0.764930344 | 0           |
| RP11-474021.5 | ANXA1      | 0.594193897 | 0           |
| RP11-474021.5 | S100A11    | 0.42496291  | 0           |
| RP11-474021.5 | CEACAM6    | 0.593074347 | 4.72E-43    |
| RP11-474021.5 | IER5L      | 0.435487083 | 0           |
| RP11-474021.5 | KRT80      | 0.694753161 | 0           |
| RP11-474021.5 | CDH6       | 0.500459694 | 0           |
| RP11-474021.5 | UNC5B      | 0.354934088 | 2.33E-14    |
| RP11-474021.5 | PLEKHN1    | 0.578128431 | 0           |
| RP11-474021.5 | SYTL1      | 0.363294252 | 4.59E-15    |
| RP11-474021.5 | TMEM163    | 0.613566012 | 0           |
| RP11-474021.5 | C4orf48    | 0.091793304 | 0.054647343 |
| RP11-474021.5 | B3GNT7     | 0.396083168 | 0           |
| RP11-474021.5 | BAIAP3     | 0.589699646 | 0           |
| RP11-474021.5 | PHLDA2     | 0.381543443 | 2.54E-17    |
| RP11-474021.5 | GAP43      | 0.548735494 | 6.97E-36    |
| RP11-474021.5 | S100A1     | 0.484305863 | 0           |
| RP11-474021.5 | PTPRE      | 0.791243401 | 0           |
| RP11-474021.5 | CCND1      | 0.617598017 | 0           |
| RP11-474021.5 | ST6GALNAC5 | 0.691820601 | 8.70E-64    |
| RP11-474021.5 | KRT17      | 0.310147738 | 3.87E-11    |
| RP11-474021.5 | HPCAL4     | 0.498651413 | 0           |
| RP11-474021.5 | GABBR2     | 0.362963063 | 4.91E-15    |
| RP11-474021.5 | DIRAS3     | 0.394105391 | 0           |



|               |         |             |             |
|---------------|---------|-------------|-------------|
| RP11-474021.5 | SERINC2 | 0.427394565 | 0           |
| RP11-474021.5 | PTCHD4  | 0.44707546  | 0           |
| RP11-474021.5 | EPS8    | 0.650011205 | 0           |
| RP11-474021.5 | LY6E    | 0.499658598 | 0           |
| RP11-474021.5 | UPP1    | 0.616170142 | 0           |
| RP11-474021.5 | AHNAK2  | 0.679545242 | 0           |
| RP11-474021.5 | PLXNC1  | 0.509176862 | 0           |
| RP11-474021.5 | TNC     | 0.424827597 | 0           |
| RP11-474021.5 | DUSP4   | 0.408930633 | 0           |
| RP11-474021.5 | NRCAM   | 0.625110137 | 0           |
| RP11-474021.5 | NRP2    | 0.516558067 | 0           |
| RP11-474021.5 | CTSC    | 0.557395246 | 0           |
| RP11-474021.5 | AMIG02  | 0.5078426   | 0           |
| RP11-474021.5 | NAB2    | 0.492759073 | 0           |
| RP11-474021.5 | TBC1D2  | 0.722558061 | 0           |
| RP11-474021.5 | PHLDA3  | 0.389301934 | 0           |
| RP11-474021.5 | PTP4A3  | 0.346349112 | 1.10E-13    |
| RP11-474021.5 | CRABP2  | 0.210093272 | 9.47E-06    |
| RP11-474021.5 | GOS2    | 0.243706828 | 2.56E-07    |
| RP11-474021.5 | S100A6  | 0.550310198 | 0           |
| RP11-474021.5 | FOXQ1   | 0.629251072 | 0           |
| RP11-474021.5 | LRG1    | 0.579845369 | 0           |
| RP11-474021.5 | LAMP5   | 0.37729684  | 1.59E-16    |
| RP11-474021.5 | ALDH3B1 | 0.673186541 | 0           |
| RP11-474021.5 | CDH2    | 0.091631042 | 0.055077825 |
| RP11-474021.5 | SCG5    | 0.217030952 | 4.70E-06    |
| RP11-474021.5 | ZCCHC16 | 0.474562883 | 4.88E-26    |
| RP11-474021.5 | GRB7    | 0.664569226 | 0           |
| RP11-474021.5 | TIAM1   | 0.522179356 | 0           |
| RP11-474021.5 | FXD5    | 0.203059001 | 1.88E-05    |
| RP11-474021.5 | CLDN9   | 0.462216432 | 0           |
| RP11-474021.5 | FAM43A  | 0.603523234 | 0           |
| RP11-474021.5 | CHST2   | 0.531919028 | 0           |
| RP11-474021.5 | HMGA2   | 0.383335981 | 1.36E-18    |
| RP11-474021.5 | GALNT7  | 0.589849426 | 0           |
| RP11-474021.5 | CBLN1   | 0.557987842 | 0           |
| RP11-474021.5 | STRA6   | 0.552432507 | 0           |
| RP11-474021.5 | MUC21   | 0.634188305 | 9.04E-51    |
| RP11-474021.5 | PRR36   | 0.459806761 | 0           |
| RP11-474021.5 | NFE2L3  | 0.456618262 | 0           |
| RP11-474021.5 | NR1D1   | 0.416893937 | 0           |
| RP11-474021.5 | MUC1    | 0.568731295 | 0           |
| RP11-474021.5 | NAT8L   | 0.27347135  | 6.60E-09    |
| RP11-474021.5 | APOC1   | 0.226539855 | 1.73E-06    |
| RP11-474021.5 | EVA1A   | 0.632055475 | 0           |
| RP11-474021.5 | ENTPD1  | 0.493003174 | 0           |
| RP11-474021.5 | COL1A1  | 0.342245622 | 2.25E-13    |
| RP11-474021.5 | FNDC4   | 0.432159016 | 0           |
| RP11-474021.5 | FRMD3   | 0.417632767 | 0           |
| RP11-474021.5 | SHROOM4 | 0.677098268 | 0           |
| RP11-474021.5 | NELL2   | 0.495213139 | 0           |

|               |           |             |             |
|---------------|-----------|-------------|-------------|
| RP11-474021.5 | EPHB3     | 0.607877776 | 0           |
| RP11-474021.5 | TMC6      | 0.548230724 | 0           |
| RP11-474021.5 | NOD1      | 0.690531946 | 0           |
| RP11-474021.5 | GGCT      | 0.623436175 | 0           |
| RP11-474021.5 | ICAM1     | 0.647572316 | 0           |
| RP11-474021.5 | PRSS23    | 0.575740319 | 0           |
| RP11-474021.5 | CFI       | 0.551241359 | 0           |
| RP11-474021.5 | CD55      | 0.713790257 | 0           |
| RP11-474021.5 | RASD2     | 0.601258663 | 0           |
| RP11-474021.5 | KLK11     | 0.562890607 | 4.69E-38    |
| RP11-474021.5 | ICAM5     | 0.640149553 | 0           |
| RP11-474021.5 | ADORA1    | 0.421483928 | 0           |
| RP11-474021.5 | ITGA2     | 0.641291342 | 0           |
| RP11-474021.5 | ABCC3     | 0.499022742 | 0           |
| RP11-474021.5 | MFGE8     | 0.543208413 | 0           |
| RP11-474021.5 | STK32A    | 0.422255806 | 0           |
| RP11-474021.5 | CYSLTR2   | 0.563696928 | 0           |
| RP11-474021.5 | LAD1      | 0.646874902 | 0           |
| RP11-474021.5 | MGAT3     | 0.696056786 | 0           |
| RP11-474021.5 | IGFBP6    | 0.456248493 | 0           |
| RP11-474021.5 | CYP2S1    | 0.625557775 | 0           |
| RP11-474021.5 | KCNJ2     | 0.454153133 | 0           |
| RP11-474021.5 | FAM20A    | 0.474077562 | 0           |
| RP11-474021.5 | TGFA      | 0.609514435 | 0           |
| RP11-474021.5 | MXRA8     | 0.554864446 | 0           |
| RP11-474021.5 | C8orf4    | 0.394502109 | 0           |
| RP11-474021.5 | CLDN10    | 0.526908173 | 9.91E-33    |
| RP11-474021.5 | PDE5A     | 0.751624744 | 0           |
| RP11-474021.5 | APOE      | 0.225646139 | 1.91E-06    |
| RP11-474021.5 | SPOCK2    | 0.634444013 | 0           |
| RP11-474021.5 | TENM1     | 0.352670368 | 3.54E-14    |
| RP11-474021.5 | SLIT1     | 0.233815532 | 7.84E-07    |
| RP11-474021.5 | CXCL14    | 0.309752296 | 4.11E-11    |
| RP11-474021.5 | ECM1      | 0.157465881 | 0.000943251 |
| RP11-474021.5 | DUSP5     | 0.655876738 | 0           |
| RP11-474021.5 | SEZ6L2    | 0.436266194 | 0           |
| RP11-474021.5 | THRSP     | 0.255996307 | 5.97E-08    |
| RP11-474021.5 | C19orf33  | 0.537050128 | 0           |
| RP11-474021.5 | MPZL2     | 0.617834175 | 0           |
| RP11-474021.5 | CTSH      | 0.590862143 | 0           |
| RP11-474021.5 | CYP1B1    | 0.578752372 | 0           |
| RP11-474021.5 | ALOX5     | 0.528015954 | 0           |
| RP11-474021.5 | SYTL5     | 0.702629969 | 1.41E-66    |
| RP11-474021.5 | TNFRSF12A | 0.506470752 | 0           |
| RP11-474021.5 | DUSP6     | 0.574681647 | 0           |
| RP11-474021.5 | ALOX15B   | 0.612584499 | 0           |
| RP11-474021.5 | SDC4      | 0.670861547 | 0           |
| RP11-474021.5 | MDK       | 0.470891758 | 0           |
| RP11-474021.5 | KRT19     | 0.579978696 | 0           |
| RP11-474021.5 | MET       | 0.819948116 | 0           |
| RP11-474021.5 | TESC      | 0.335052919 | 7.60E-13    |

|               |          |             |          |
|---------------|----------|-------------|----------|
| RP11-474021.5 | CXCL17   | 0.627146656 | 2.29E-49 |
| RP11-474021.5 | NPC2     | 0.465472303 | 0        |
| RP11-474021.5 | COMP     | 0.435495451 | 0        |
| RP11-474021.5 | TUSC3    | 0.478980872 | 0        |
| RP11-474021.5 | TMPRSS4  | 0.69884729  | 0        |
| RP11-474021.5 | LGALS3   | 0.659834136 | 0        |
| RP11-474021.5 | CRLF1    | 0.457843452 | 0        |
| RP11-474021.5 | CTXN1    | 0.512221964 | 0        |
| RP11-474021.5 | PCSK1N   | 0.20512798  | 1.54E-05 |
| RP11-474021.5 | NMU      | 0.567504768 | 8.72E-39 |
| RP11-474021.5 | GALE     | 0.50326268  | 0        |
| RP11-474021.5 | PCSK2    | 0.241260138 | 3.39E-07 |
| RP11-474021.5 | GJB3     | 0.587139485 | 0        |
| RP11-474021.5 | SLPI     | 0.478331825 | 0        |
| RP11-474021.5 | AGR2     | 0.356844776 | 1.63E-14 |
| RP11-474021.5 | MRC2     | 0.471104372 | 0        |
| RP11-474021.5 | GOLT1A   | 0.445518088 | 0        |
| RP11-474021.5 | SLC27A6  | 0.674913858 | 1.16E-59 |
| RP11-474021.5 | KCNN4    | 0.486475688 | 0        |
| RP11-474021.5 | ETV4     | 0.500457088 | 3.33E-29 |
| RP11-474021.5 | SYT12    | 0.631661735 | 0        |
| RP11-474021.5 | PVRL4    | 0.629312771 | 0        |
| RP11-474021.5 | PLCD3    | 0.663049583 | 0        |
| RP11-474021.5 | PLAU     | 0.396190113 | 0        |
| RP11-474021.5 | LRRK2    | 0.308039187 | 5.31E-11 |
| RP11-474021.5 | SFN      | 0.5028288   | 0        |
| RP11-474021.5 | LPAR5    | 0.692687303 | 0        |
| RP11-474021.5 | NGEF     | 0.666609837 | 0        |
| RP11-474021.5 | DTX4     | 0.787133812 | 0        |
| RP11-474021.5 | CST6     | 0.636288179 | 0        |
| RP11-474021.5 | QPCT     | 0.473035485 | 0        |
| RP11-474021.5 | TIMP1    | 0.463395382 | 0        |
| RP11-474021.5 | CAMK2N1  | 0.521373721 | 0        |
| RP11-474021.5 | KLHDC8A  | 0.238074334 | 4.87E-07 |
| RP11-474021.5 | PDLIM4   | 0.603031059 | 0        |
| RP11-474021.5 | SCEL     | 0.61663863  | 0        |
| RP11-474021.5 | LCN2     | 0.590184019 | 0        |
| RP11-474021.5 | PROS1    | 0.794979533 | 0        |
| RP11-474021.5 | GABRB2   | 0.762294443 | 0        |
| RP11-474021.5 | TMPRSS6  | 0.720146121 | 0        |
| RP11-474021.5 | KLK7     | 0.621377224 | 3.05E-48 |
| RP11-474021.5 | PDZK1IP1 | 0.431339765 | 0        |
| RP11-474021.5 | CDH3     | 0.522626001 | 0        |
| RP11-474021.5 | LRP4     | 0.435460559 | 0        |
| RP11-474021.5 | IGSF1    | 0.47681743  | 0        |
| RP11-474021.5 | B3GNT3   | 0.701789275 | 0        |
| RP11-474021.5 | CLDN1    | 0.573852467 | 0        |
| RP11-474021.5 | GDF15    | 0.599218336 | 0        |
| RP11-474021.5 | ARHGAP36 | 0.468717688 | 2.33E-25 |
| RP11-474021.5 | LAMB3    | 0.542989274 | 0        |
| RP11-474021.5 | KLK10    | 0.672364595 | 0        |

|               |           |              |          |
|---------------|-----------|--------------|----------|
| RP11-474021.5 | DPP4      | 0.691933581  | 0        |
| RP11-474021.5 | METTL7B   | 0.476007682  | 0        |
| RP11-474021.5 | LIPH      | 0.686148469  | 0        |
| RP11-474021.5 | CLDN16    | 0.605299886  | 0        |
| RP11-474021.5 | CHI3L1    | 0.515837534  | 0        |
| RP11-474021.5 | SLC22A31  | 0.502393183  | 1.88E-29 |
| RP11-474021.5 | TACSTD2   | 0.684384725  | 0        |
| RP11-474021.5 | SFTPB     | 0.555979712  | 0        |
| RP11-474021.5 | RXRG      | 0.485768346  | 0        |
| RP11-474021.5 | DCSTAMP   | 0.699856195  | 7.53E-66 |
| RP11-474021.5 | CITED1    | 0.486232295  | 0        |
| RP11-474021.5 | SERPINA1  | 0.642718507  | 0        |
| RP11-474021.5 | PRR15     | 0.453011911  | 0        |
| RP11-474021.5 | SLC34A2   | 0.764830632  | 0        |
| RP11-474021.5 | FN1       | 0.670825804  | 0        |
| RP11-474021.5 | ZCCHC12   | 0.511313355  | 0        |
| AC079630.2    | TFF3      | -0.457599074 | 4.18E-24 |
| AC079630.2    | CCL21     | -0.348316534 | 5.74E-14 |
| AC079630.2    | TPO       | -0.338916216 | 2.92E-13 |
| AC079630.2    | MT1G      | -0.330297698 | 1.24E-12 |
| AC079630.2    | DI01      | -0.364378094 | 3.13E-15 |
| AC079630.2    | DPT       | -0.335629135 | 5.10E-13 |
| AC079630.2    | CDH16     | -0.461666106 | 1.47E-24 |
| AC079630.2    | CRABP1    | -0.371150622 | 8.74E-16 |
| AC079630.2    | SLC26A7   | -0.269054344 | 1.02E-08 |
| AC079630.2    | MT1H      | -0.337438864 | 3.75E-13 |
| AC079630.2    | SLC26A4   | -0.206140619 | 1.34E-05 |
| AC079630.2    | SLC5A8    | -0.378032682 | 2.32E-16 |
| AC079630.2    | PKHD1L1   | -0.431002491 | 2.77E-21 |
| AC079630.2    | TFCP2L1   | -0.377261013 | 2.69E-16 |
| AC079630.2    | WSCD2     | -0.33986641  | 2.49E-13 |
| AC079630.2    | IPCEF1    | -0.356863867 | 1.25E-14 |
| AC079630.2    | SLC5A5    | -0.352428204 | 2.77E-14 |
| AC079630.2    | MT1F      | -0.405806906 | 7.82E-19 |
| AC079630.2    | FOSB      | -0.195163666 | 3.84E-05 |
| AC079630.2    | SEMA3D    | -0.376634806 | 3.04E-16 |
| AC079630.2    | BMP8A     | -0.250049068 | 1.10E-07 |
| AC079630.2    | MATN2     | -0.377187186 | 2.73E-16 |
| AC079630.2    | PLA2R1    | -0.409148146 | 3.80E-19 |
| AC079630.2    | COL23A1   | -0.35133447  | 3.37E-14 |
| AC079630.2    | HGD       | -0.277494853 | 3.34E-09 |
| AC079630.2    | TCEAL2    | -0.287757574 | 8.13E-10 |
| AC079630.2    | CHRD1     | -0.255517554 | 5.67E-08 |
| AC079630.2    | TNFRSF11B | -0.359765972 | 7.34E-15 |
| AC079630.2    | FAM167A   | -0.252289138 | 8.42E-08 |
| AC079630.2    | KIT       | -0.430022157 | 3.48E-21 |
| AC079630.2    | SLC4A4    | -0.32701681  | 2.12E-12 |
| AC079630.2    | SMOC2     | -0.331132494 | 1.08E-12 |
| AC079630.2    | FHL1      | -0.321489186 | 5.17E-12 |
| AC079630.2    | OTOS      | -0.386683761 | 4.17E-17 |
| AC079630.2    | IGFBPL1   | -0.335837071 | 4.92E-13 |

|            |            |              |             |
|------------|------------|--------------|-------------|
| AC079630.2 | HBB        | -0.234380634 | 6.83E-07    |
| AC079630.2 | BEX1       | -0.23655943  | 5.34E-07    |
| AC079630.2 | FABP4      | -0.294764625 | 3.00E-10    |
| AC079630.2 | LMOD1      | -0.279196501 | 2.65E-09    |
| AC079630.2 | SOD3       | -0.362683538 | 4.29E-15    |
| AC079630.2 | TMEM171    | -0.479275045 | 1.36E-26    |
| AC079630.2 | PI16       | -0.300757795 | 1.25E-10    |
| AC079630.2 | ZMAT4      | -0.387416281 | 3.59E-17    |
| AC079630.2 | MFAP4      | -0.259285934 | 3.55E-08    |
| AC079630.2 | CWH43      | -0.476828119 | 2.64E-26    |
| AC079630.2 | SPX        | -0.263958196 | 1.97E-08    |
| AC079630.2 | APOD       | -0.323261683 | 3.89E-12    |
| AC079630.2 | DPP6       | -0.433748421 | 1.45E-21    |
| AC079630.2 | MMRN1      | -0.269100087 | 1.02E-08    |
| AC079630.2 | WDR72      | -0.35231153  | 2.83E-14    |
| AC079630.2 | MPPED2     | -0.308093375 | 4.17E-11    |
| AC079630.2 | PAPSS2     | -0.332160191 | 9.10E-13    |
| AC079630.2 | DCN        | -0.269599008 | 9.51E-09    |
| AC079630.2 | SORBS2     | -0.29508897  | 2.86E-10    |
| AC079630.2 | EGR2       | -0.149983768 | 0.001624936 |
| AC079630.2 | EDN3       | 0.003058355  | 0.94905215  |
| AC079630.2 | DIO2       | -0.277044584 | 3.54E-09    |
| AC079630.2 | ITPR1      | -0.240923687 | 3.24E-07    |
| AC079630.2 | CFD        | -0.3263752   | 2.35E-12    |
| AC079630.2 | CPXM1      | -0.365560325 | 2.51E-15    |
| AC079630.2 | ELMO1      | -0.281072753 | 2.05E-09    |
| AC079630.2 | GPC3       | -0.336566729 | 4.35E-13    |
| AC079630.2 | MYOC       | -0.188714896 | 6.93E-05    |
| AC079630.2 | DEPTOR     | -0.392459604 | 1.29E-17    |
| AC079630.2 | DGKI       | -0.425296919 | 1.04E-20    |
| AC079630.2 | CARTPT     | -0.208498556 | 1.06E-05    |
| AC079630.2 | IYD        | -0.258277882 | 4.03E-08    |
| AC079630.2 | LYVE1      | -0.262393281 | 2.40E-08    |
| AC079630.2 | CLCNKB     | -0.372843992 | 6.32E-16    |
| AC079630.2 | NCAM1      | -0.39641508  | 5.69E-18    |
| AC079630.2 | HBA2       | -0.276639491 | 3.74E-09    |
| AC079630.2 | GLT8D2     | -0.303700679 | 8.07E-11    |
| AC079630.2 | OGDHL      | -0.426010229 | 8.79E-21    |
| AC079630.2 | LIFR       | -0.197633658 | 3.04E-05    |
| AC079630.2 | CSGALNACT1 | -0.424350566 | 1.29E-20    |
| AC079630.2 | RAP1GAP    | -0.451473029 | 1.96E-23    |
| AC079630.2 | COL9A3     | -0.310419045 | 2.92E-11    |
| AC079630.2 | FBLN1      | -0.358078934 | 1.00E-14    |
| AC079630.2 | EFEMP1     | -0.357818801 | 1.05E-14    |
| AC079630.2 | AOX1       | -0.394273318 | 8.87E-18    |
| AC079630.2 | GRIN2C     | -0.316711325 | 1.10E-11    |
| AC079630.2 | C11orf74   | -0.440207575 | 3.12E-22    |
| AC079630.2 | PPARGC1A   | -0.409178925 | 3.78E-19    |
| AC079630.2 | ANGPTL1    | -0.267113555 | 1.31E-08    |
| AC079630.2 | SCARA5     | -0.321858637 | 4.88E-12    |
| AC079630.2 | LTF        | -0.336767348 | 4.21E-13    |

|            |          |              |             |
|------------|----------|--------------|-------------|
| AC079630.2 | CA4      | -0.163008444 | 0.00060664  |
| AC079630.2 | TG       | -0.169014576 | 0.000375439 |
| AC079630.2 | FCGBP    | -0.39368772  | 1.00E-17    |
| AC079630.2 | PBX4     | -0.418581815 | 4.74E-20    |
| AC079630.2 | CYR61    | -0.255116494 | 5.96E-08    |
| AC079630.2 | FOS      | -0.199955285 | 2.44E-05    |
| AC079630.2 | KHDRBS2  | -0.276982742 | 3.57E-09    |
| AC079630.2 | MUM1L1   | -0.380450273 | 1.44E-16    |
| AC079630.2 | RGS16    | -0.291564827 | 4.74E-10    |
| AC079630.2 | MT1M     | -0.364785527 | 2.90E-15    |
| AC079630.2 | LRP2     | -0.262330447 | 2.42E-08    |
| AC079630.2 | MAFB     | -0.313903401 | 1.71E-11    |
| AC079630.2 | KCNK2    | -0.407021902 | 6.02E-19    |
| AC079630.2 | TBC1D4   | -0.196055978 | 3.53E-05    |
| AC079630.2 | MIOX     | -0.33651907  | 4.39E-13    |
| AC079630.2 | TPPP     | -0.372164014 | 7.20E-16    |
| AC079630.2 | FMOD     | -0.421216695 | 2.62E-20    |
| AC079630.2 | CITED2   | -0.381201525 | 1.24E-16    |
| AC079630.2 | RGS8     | -0.348896793 | 5.18E-14    |
| AC079630.2 | ABI3BP   | -0.269909281 | 9.13E-09    |
| AC079630.2 | ADH1B    | -0.292623672 | 4.08E-10    |
| AC079630.2 | OGN      | -0.308919659 | 3.67E-11    |
| AC079630.2 | NR4A1    | -0.155131759 | 0.001110724 |
| AC079630.2 | FOXJ1    | -0.268763269 | 1.06E-08    |
| AC079630.2 | ALDH1A1  | -0.320484467 | 6.07E-12    |
| AC079630.2 | OCA2     | -0.462078888 | 1.32E-24    |
| AC079630.2 | TMEM139  | -0.443571864 | 1.38E-22    |
| AC079630.2 | ARHGAP24 | -0.227489579 | 1.46E-06    |
| AC079630.2 | SLC25A15 | -0.288027352 | 7.83E-10    |
| AC079630.2 | DES      | -0.305071426 | 6.58E-11    |
| AC079630.2 | GDF10    | -0.31000667  | 3.11E-11    |
| AC079630.2 | KIAA1324 | -0.240810215 | 3.28E-07    |
| AC079630.2 | JUN      | -0.20246563  | 1.92E-05    |
| AC079630.2 | C7       | -0.186210407 | 8.68E-05    |
| AC079630.2 | LGI3     | -0.229562633 | 1.17E-06    |
| AC079630.2 | CDON     | -0.249239235 | 1.22E-07    |
| AC079630.2 | BCL2     | -0.383008134 | 8.69E-17    |
| AC079630.2 | HLF      | -0.155059492 | 0.001116762 |
| AC079630.2 | EGR1     | -0.155448841 | 0.001084584 |
| AC079630.2 | IP6K3    | -0.404051076 | 1.14E-18    |
| AC079630.2 | SCUBE3   | -0.277906117 | 3.16E-09    |
| AC079630.2 | PKNOX2   | -0.313500932 | 1.82E-11    |
| AC079630.2 | SMAD9    | -0.419884681 | 3.54E-20    |
| AC079630.2 | IQGAP2   | -0.305671396 | 6.01E-11    |
| AC079630.2 | GNA14    | -0.26571509  | 1.57E-08    |
| AC079630.2 | LAYN     | -0.371054262 | 8.90E-16    |
| AC079630.2 | AVPR1A   | -0.237915982 | 4.58E-07    |
| AC079630.2 | PDLIM3   | -0.381527685 | 1.17E-16    |
| AC079630.2 | GPM6A    | -0.310377132 | 2.94E-11    |
| AC079630.2 | SDPR     | -0.048931337 | 0.306347958 |
| AC079630.2 | CRYAB    | -0.505379881 | 7.75E-30    |

|            |          |              |             |
|------------|----------|--------------|-------------|
| AC079630.2 | FOXA2    | -0.275404333 | 4.42E-09    |
| AC079630.2 | C8orf88  | -0.279036648 | 2.71E-09    |
| AC079630.2 | ISM1     | -0.132532272 | 0.00541549  |
| AC079630.2 | BMP2     | -0.323650464 | 3.66E-12    |
| AC079630.2 | ID4      | -0.440489552 | 2.91E-22    |
| AC079630.2 | NUPR1    | -0.455810833 | 6.59E-24    |
| AC079630.2 | SERTM1   | -0.425738286 | 9.36E-21    |
| AC079630.2 | IRS1     | -0.188269135 | 7.22E-05    |
| AC079630.2 | FIBIN    | -0.367255448 | 1.83E-15    |
| AC079630.2 | PODN     | -0.308743709 | 3.77E-11    |
| AC079630.2 | TDRD9    | -0.37424728  | 4.83E-16    |
| AC079630.2 | EPHA3    | -0.240390441 | 3.45E-07    |
| AC079630.2 | AIF1L    | -0.455594528 | 6.96E-24    |
| AC079630.2 | EBF4     | -0.358046807 | 1.01E-14    |
| AC079630.2 | ADM2     | -0.407628266 | 5.28E-19    |
| AC079630.2 | GSTM3    | -0.351281989 | 3.40E-14    |
| AC079630.2 | HSD17B6  | -0.185168951 | 9.52E-05    |
| AC079630.2 | AGR3     | -0.357879267 | 1.04E-14    |
| AC079630.2 | EPHB1    | -0.370967031 | 9.05E-16    |
| AC079630.2 | TMOD1    | -0.260267747 | 3.14E-08    |
| AC079630.2 | WASF3    | -0.231989222 | 8.92E-07    |
| AC079630.2 | SELV     | -0.348645587 | 5.42E-14    |
| AC079630.2 | ENPP1    | -0.221169356 | 2.88E-06    |
| AC079630.2 | SYNE1    | -0.232471768 | 8.45E-07    |
| AC079630.2 | PLCH1    | -0.312512808 | 2.12E-11    |
| AC079630.2 | CCDC146  | -0.304499022 | 7.16E-11    |
| AC079630.2 | SLC16A2  | -0.220640366 | 3.05E-06    |
| AC079630.2 | IER2     | -0.271419729 | 7.49E-09    |
| AC079630.2 | KCNAB1   | -0.10212346  | 0.032417918 |
| AC079630.2 | SYNDIG1  | -0.41923456  | 4.10E-20    |
| AC079630.2 | C16orf89 | -0.147279245 | 0.00197522  |
| AC079630.2 | CTGF     | -0.147415198 | 0.001956081 |
| AC079630.2 | NR4A3    | -0.150001285 | 0.001622866 |
| AC079630.2 | KIAA1456 | -0.307201489 | 4.77E-11    |
| AC079630.2 | AQP4     | -0.111425928 | 0.019530238 |
| AC079630.2 | RNF150   | -0.324916949 | 2.98E-12    |
| AC079630.2 | C1S      | -0.224258831 | 2.08E-06    |
| AC079630.2 | PFKFB2   | -0.247040441 | 1.58E-07    |
| AC079630.2 | PROX1    | -0.244835902 | 2.05E-07    |
| AC079630.2 | TCF7L1   | -0.316731467 | 1.10E-11    |
| AC079630.2 | HSPB6    | -0.251163145 | 9.65E-08    |
| AC079630.2 | FHDC1    | -0.243584311 | 2.38E-07    |
| AC079630.2 | PRR15L   | -0.243125389 | 2.51E-07    |
| AC079630.2 | SLC1A1   | -0.330499748 | 1.20E-12    |
| AC079630.2 | BTBD11   | -0.250530258 | 1.04E-07    |
| AC079630.2 | TRIM58   | -0.201988411 | 2.01E-05    |
| AC079630.2 | LRIG1    | -0.398027014 | 4.07E-18    |
| AC079630.2 | ROR2     | -0.485621011 | 2.34E-27    |
| AC079630.2 | GPR125   | -0.380653529 | 1.38E-16    |
| AC079630.2 | FLRT1    | -0.344201791 | 1.18E-13    |
| AC079630.2 | PGF      | -0.358812953 | 8.74E-15    |

|            |          |              |             |
|------------|----------|--------------|-------------|
| AC079630.2 | DUSP1    | -0.184831586 | 9.81E-05    |
| AC079630.2 | PLA2G7   | -0.459144343 | 2.82E-24    |
| AC079630.2 | PLSCR4   | -0.263536791 | 2.08E-08    |
| AC079630.2 | FAM46B   | -0.440841526 | 2.67E-22    |
| AC079630.2 | GLDC     | -0.327797069 | 1.87E-12    |
| AC079630.2 | ZBTB16   | -0.11866066  | 0.012849117 |
| AC079630.2 | OMD      | -0.271508691 | 7.40E-09    |
| AC079630.2 | HSD11B2  | -0.27247161  | 6.52E-09    |
| AC079630.2 | FGL2     | -0.176061938 | 0.000209407 |
| AC079630.2 | CLCNKA   | -0.36372139  | 3.54E-15    |
| AC079630.2 | GATM     | -0.241712385 | 2.96E-07    |
| AC079630.2 | TNS3     | -0.421717956 | 2.34E-20    |
| AC079630.2 | TOB1     | -0.345007226 | 1.02E-13    |
| AC079630.2 | MARC2    | -0.322169945 | 4.64E-12    |
| AC079630.2 | LRRC2    | -0.264230811 | 1.90E-08    |
| AC079630.2 | SORD     | -0.446501699 | 6.74E-23    |
| AC079630.2 | RIMS4    | -0.290051897 | 5.88E-10    |
| AC079630.2 | SLC29A4  | -0.399475123 | 3.00E-18    |
| AC079630.2 | SLC39A14 | -0.245559921 | 1.88E-07    |
| AC079630.2 | FAXDC2   | -0.302068888 | 1.03E-10    |
| AC079630.2 | HSPB8    | -0.458587127 | 3.25E-24    |
| AC079630.2 | CCL19    | -0.145338619 | 0.00226774  |
| AC079630.2 | KCNIP3   | -0.214506237 | 5.77E-06    |
| AC079630.2 | CGNL1    | -0.098646976 | 0.038825429 |
| AC079630.2 | ATF3     | -0.140412302 | 0.003196352 |
| AC079630.2 | SGCD     | -0.428046547 | 5.50E-21    |
| AC079630.2 | STARD13  | -0.296408998 | 2.36E-10    |
| AC079630.2 | LDHD     | -0.273648736 | 5.58E-09    |
| AC079630.2 | RCAN1    | -0.329163975 | 1.49E-12    |
| AC079630.2 | ID3      | -0.516118259 | 2.96E-31    |
| AC079630.2 | SYTL3    | -0.262272718 | 2.44E-08    |
| AC079630.2 | MT1E     | -0.287915228 | 7.95E-10    |
| AC079630.2 | CAMK1D   | -0.189499734 | 6.46E-05    |
| AC079630.2 | PRKCQ    | -0.338206026 | 3.30E-13    |
| AC079630.2 | NUAK2    | -0.515959257 | 3.11E-31    |
| AC079630.2 | LIPG     | -0.097667078 | 0.04081441  |
| AC079630.2 | SLC25A25 | -0.328542932 | 1.65E-12    |
| AC079630.2 | PRKX     | -0.43202727  | 2.18E-21    |
| AC079630.2 | SRPX     | -0.2028859   | 1.84E-05    |
| AC079630.2 | FAM189A1 | -0.244984266 | 2.02E-07    |
| AC079630.2 | PLEKHH1  | -0.221000354 | 2.94E-06    |
| AC079630.2 | WNT11    | -0.421658454 | 2.37E-20    |
| AC079630.2 | SNAI1    | -0.495873945 | 1.27E-28    |
| AC079630.2 | FDCSP    | -0.091065712 | 0.056577376 |
| AC079630.2 | MT1X     | -0.320243127 | 6.31E-12    |
| AC079630.2 | ACACB    | -0.288590242 | 7.23E-10    |
| AC079630.2 | ARC      | -0.029577916 | 0.53651305  |
| AC079630.2 | KLK4     | -0.522785173 | 3.68E-32    |
| AC079630.2 | ZFPM2    | -0.319387339 | 7.22E-12    |
| AC079630.2 | AKAP12   | -0.236200434 | 5.56E-07    |
| AC079630.2 | GJB6     | -0.413210131 | 1.56E-19    |



|            |          |              |             |
|------------|----------|--------------|-------------|
| AC079630.2 | ERO1LB   | -0.24607416  | 1.77E-07    |
| AC079630.2 | DNALI1   | -0.270531176 | 8.42E-09    |
| AC079630.2 | HKDC1    | -0.403761298 | 1.21E-18    |
| AC079630.2 | ZFP36L2  | -0.385142392 | 5.68E-17    |
| AC079630.2 | CAPSL    | -0.211505425 | 7.84E-06    |
| AC079630.2 | CYP7B1   | -0.226485923 | 1.63E-06    |
| AC079630.2 | CPQ      | -0.199867132 | 2.46E-05    |
| AC079630.2 | RPS6KA6  | -0.311949149 | 2.31E-11    |
| AC079630.2 | TLE1     | -0.493444944 | 2.55E-28    |
| AC079630.2 | TP53INP2 | -0.260989355 | 2.87E-08    |
| AC079630.2 | KATNAL2  | -0.342209231 | 1.66E-13    |
| AC079630.2 | SGPP2    | -0.299416349 | 1.52E-10    |
| AC079630.2 | CTH      | -0.36503864  | 2.77E-15    |
| AC079630.2 | KIF12    | -0.480426355 | 9.89E-27    |
| AC079630.2 | TMEM220  | -0.235712294 | 5.88E-07    |
| AC079630.2 | CENPJ    | -0.3120102   | 2.29E-11    |
| AC079630.2 | FAM155B  | 0.104414238  | 0.028708514 |
| AC079630.2 | WFS1     | -0.482321117 | 5.86E-27    |
| AC079630.2 | SELENBP1 | -0.173490603 | 0.000259799 |
| AC079630.2 | SNTA1    | -0.419932481 | 3.50E-20    |
| AC079630.2 | FRAS1    | -0.502212819 | 1.98E-29    |
| AC079630.2 | FBLN7    | -0.363583935 | 3.63E-15    |
| AC079630.2 | AGPAT9   | -0.205804601 | 1.38E-05    |
| AC079630.2 | GPR83    | -0.260476889 | 3.06E-08    |
| AC079630.2 | PRTG     | -0.239831169 | 3.67E-07    |
| AC079630.2 | EGR3     | -0.042210489 | 0.377625576 |
| AC079630.2 | GRAMD2   | -0.507623426 | 3.95E-30    |
| AC079630.2 | HYOU1    | -0.259438766 | 3.49E-08    |
| AC079630.2 | FBLN5    | -0.28018115  | 2.32E-09    |
| AC079630.2 | ITM2A    | -0.171423151 | 0.000308308 |
| AC079630.2 | SRF      | -0.310904491 | 2.71E-11    |
| AC079630.2 | FGFR2    | -0.36127869  | 5.56E-15    |
| AC079630.2 | MT1A     | -0.249126056 | 1.23E-07    |
| AC079630.2 | MAMDC2   | -0.192705092 | 4.82E-05    |
| AC079630.2 | FHL2     | -0.463105493 | 1.01E-24    |
| AC079630.2 | FTCDNL1  | -0.458778823 | 3.09E-24    |
| AC079630.2 | PKIA     | -0.195570603 | 3.69E-05    |
| AC079630.2 | DNAJB4   | -0.146067724 | 0.00215349  |
| AC079630.2 | SLC25A33 | -0.379762139 | 1.65E-16    |
| AC079630.2 | EYA2     | -0.512994175 | 7.75E-31    |
| AC079630.2 | LPAR1    | -0.464217159 | 7.59E-25    |
| AC079630.2 | STX11    | -0.159997702 | 0.000766921 |
| AC079630.2 | ARHGEF28 | -0.333841343 | 6.88E-13    |
| AC079630.2 | OR2W3    | -0.243396799 | 2.43E-07    |
| AC079630.2 | ALDH1B1  | -0.423137925 | 1.70E-20    |
| AC079630.2 | CXCL12   | -0.189932628 | 6.21E-05    |
| AC079630.2 | OLFM2    | -0.248797689 | 1.28E-07    |
| AC079630.2 | TUB      | -0.337597464 | 3.66E-13    |
| AC079630.2 | HTRA3    | -0.366760783 | 2.01E-15    |
| AC079630.2 | CKB      | -0.385720671 | 5.06E-17    |
| AC079630.2 | RGS2     | -0.227565818 | 1.45E-06    |

|            |          |              |             |
|------------|----------|--------------|-------------|
| AC079630.2 | SHANK2   | -0.226367629 | 1.65E-06    |
| AC079630.2 | CNTFR    | -0.100171109 | 0.035895148 |
| AC079630.2 | CYTH3    | -0.306974262 | 4.94E-11    |
| AC079630.2 | PLAC9    | -0.281019989 | 2.07E-09    |
| AC079630.2 | WVOX     | -0.343742302 | 1.28E-13    |
| AC079630.2 | NPR3     | -0.22485321  | 1.95E-06    |
| AC079630.2 | SDC2     | -0.245879911 | 1.81E-07    |
| AC079630.2 | KLF15    | -0.221013191 | 2.93E-06    |
| AC079630.2 | TMEM164  | -0.392916256 | 1.17E-17    |
| AC079630.2 | LONRF3   | 0.035051996  | 0.463831665 |
| AC079630.2 | GBP1     | -0.101883681 | 0.032828856 |
| AC079630.2 | ARHGAP6  | -0.370755832 | 9.42E-16    |
| AC079630.2 | TMEM119  | -0.222918023 | 2.40E-06    |
| AC079630.2 | SH3RF1   | -0.310246285 | 3.00E-11    |
| AC079630.2 | CRELD2   | -0.370068691 | 1.07E-15    |
| AC079630.2 | PCP4     | -0.345318351 | 9.71E-14    |
| AC079630.2 | GCSH     | -0.318431128 | 8.40E-12    |
| AC079630.2 | IMPA2    | -0.37370822  | 5.35E-16    |
| AC079630.2 | C1R      | -0.232179783 | 8.73E-07    |
| AC079630.2 | SUCNR1   | -0.166652028 | 0.00045431  |
| AC079630.2 | SFRP1    | -0.226383586 | 1.65E-06    |
| AC079630.2 | UGT8     | -0.311220367 | 2.58E-11    |
| AC079630.2 | TLE4     | -0.266883421 | 1.35E-08    |
| AC079630.2 | ANTXR1   | -0.221668489 | 2.74E-06    |
| AC079630.2 | GPX3     | -0.446988776 | 5.97E-23    |
| AC079630.2 | DPY19L2  | -0.294898267 | 2.94E-10    |
| AC079630.2 | FAM46C   | -0.249445044 | 1.19E-07    |
| AC079630.2 | IL33     | -0.188659626 | 6.97E-05    |
| AC079630.2 | PEG3     | -0.23825129  | 4.40E-07    |
| AC079630.2 | FAHD2A   | -0.484955501 | 2.82E-27    |
| AC079630.2 | PTGDS    | -0.164461885 | 0.000540938 |
| AC079630.2 | CHCHD10  | -0.466485739 | 4.19E-25    |
| AC079630.2 | CD36     | -0.131496915 | 0.005792496 |
| AC079630.2 | ANKRD37  | -0.349635446 | 4.55E-14    |
| AC079630.2 | TSPAN33  | -0.347071699 | 7.15E-14    |
| AC079630.2 | PRDM16   | -0.308396131 | 3.98E-11    |
| AC079630.2 | UST      | 0.015153556  | 0.751535595 |
| AC079630.2 | NEXN     | -0.172975158 | 0.000271177 |
| AC079630.2 | NUPR1L   | -0.194442552 | 4.10E-05    |
| AC079630.2 | SLC24A3  | -0.362957714 | 4.08E-15    |
| AC079630.2 | MARC1    | -0.184577552 | 0.000100337 |
| AC079630.2 | MYH11    | -0.197503945 | 3.08E-05    |
| AC079630.2 | APOA1    | -0.37382908  | 5.23E-16    |
| AC079630.2 | TMEM178B | -0.115169354 | 0.015768752 |
| AC079630.2 | CAPN6    | -0.208696287 | 1.04E-05    |
| AC079630.2 | PPM1L    | -0.130244047 | 0.006280134 |
| AC079630.2 | FZD8     | -0.377995032 | 2.33E-16    |
| AC079630.2 | RCAN2    | -0.178210806 | 0.000174471 |
| AC079630.2 | COPZ2    | -0.481874961 | 6.63E-27    |
| AC079630.2 | GAS1     | -0.278753607 | 2.81E-09    |
| AC079630.2 | DACT1    | -0.299685205 | 1.46E-10    |

|            |          |              |             |
|------------|----------|--------------|-------------|
| AC079630.2 | WBSR17   | -0.137873873 | 0.003799119 |
| AC079630.2 | NCS1     | -0.458611311 | 3.23E-24    |
| AC079630.2 | SPIRE2   | -0.49474235  | 1.76E-28    |
| AC079630.2 | C15orf52 | -0.342008528 | 1.72E-13    |
| AC079630.2 | SPAG5    | -0.411587642 | 2.23E-19    |
| AC079630.2 | ARL4D    | -0.34996962  | 4.29E-14    |
| AC079630.2 | FAM189A2 | -0.262428812 | 2.39E-08    |
| AC079630.2 | MAP1LC3A | -0.390015994 | 2.12E-17    |
| AC079630.2 | KLF6     | -0.074314424 | 0.120000567 |
| AC079630.2 | ADD3     | -0.109523932 | 0.021724705 |
| AC079630.2 | TSPAN7   | -0.171485348 | 0.000306733 |
| AC079630.2 | KLF9     | -0.030653839 | 0.521789995 |
| AC079630.2 | KCNQ1    | -0.22199089  | 2.64E-06    |
| AC079630.2 | MAN1A1   | -0.164216007 | 0.000551567 |
| AC079630.2 | MLF1     | -0.336343958 | 4.52E-13    |
| AC079630.2 | RARB     | -0.202271239 | 1.95E-05    |
| AC079630.2 | CDC42EP2 | -0.345092897 | 1.01E-13    |
| AC079630.2 | FAM3B    | -0.274531828 | 4.96E-09    |
| AC079630.2 | GADD45B  | -0.168447218 | 0.000393121 |
| AC079630.2 | TMEM47   | -0.093407428 | 0.050488623 |
| AC079630.2 | SDF2L1   | -0.271101087 | 7.81E-09    |
| AC079630.2 | CCDC85A  | -0.221036098 | 2.93E-06    |
| AC079630.2 | CRYBG3   | -0.192990331 | 4.69E-05    |
| AC079630.2 | FBLN2    | -0.229407106 | 1.19E-06    |
| AC079630.2 | PEBP4    | -0.034359039 | 0.472719471 |
| AC079630.2 | CDADC1   | -0.220879862 | 2.97E-06    |
| AC079630.2 | FAM63A   | -0.178900287 | 0.000164473 |
| AC079630.2 | GLUL     | -0.206956834 | 1.24E-05    |
| AC079630.2 | FREM2    | -0.168317293 | 0.000397278 |
| AC079630.2 | ACKR3    | -0.329747574 | 1.36E-12    |
| AC079630.2 | DENND6A  | -0.296124539 | 2.46E-10    |
| AC079630.2 | CLDN8    | -0.462414238 | 1.21E-24    |
| AC079630.2 | UTS2R    | -0.24932523  | 1.20E-07    |
| AC079630.2 | SCNN1B   | -0.421126911 | 2.67E-20    |
| AC079630.2 | TTC30A   | -0.316965502 | 1.06E-11    |
| AC079630.2 | CORO2B   | -0.172523116 | 0.000281536 |
| AC079630.2 | TC2N     | -0.477586588 | 2.15E-26    |
| AC079630.2 | ALDH2    | -0.339594988 | 2.60E-13    |
| AC079630.2 | GPR183   | -0.035299151 | 0.460684255 |
| AC079630.2 | C4orf47  | -0.332550108 | 8.53E-13    |
| AC079630.2 | SLC25A42 | -0.181600626 | 0.00013026  |
| AC079630.2 | LGMN     | -0.307511053 | 4.55E-11    |
| AC079630.2 | ACSF2    | -0.442384597 | 1.84E-22    |
| AC079630.2 | KIAA1467 | -0.312732162 | 2.05E-11    |
| AC079630.2 | PRKG1    | -0.100355006 | 0.035554598 |
| AC079630.2 | GNAI1    | -0.141265608 | 0.003014131 |
| AC079630.2 | ABCC4    | -0.296221841 | 2.43E-10    |
| AC079630.2 | PRPS1    | -0.303686921 | 8.09E-11    |
| AC079630.2 | TSPAN5   | -0.561086533 | 8.99E-38    |
| AC079630.2 | CR2      | -0.010591647 | 0.824864186 |
| AC079630.2 | CCDC170  | -0.31146277  | 2.49E-11    |

|            |          |              |             |
|------------|----------|--------------|-------------|
| AC079630.2 | RRAD     | -0.204551166 | 1.56E-05    |
| AC079630.2 | SCGB2A1  | -0.307642184 | 4.46E-11    |
| AC079630.2 | SESN3    | -0.219804081 | 3.33E-06    |
| AC079630.2 | SGK223   | -0.370940082 | 9.10E-16    |
| AC079630.2 | NDRG2    | -0.267185964 | 1.30E-08    |
| AC079630.2 | C3orf52  | -0.23767294  | 4.70E-07    |
| AC079630.2 | FLRT3    | 0.397004281  | 5.03E-18    |
| AC079630.2 | MST1R    | 0.251418173  | 9.36E-08    |
| AC079630.2 | SDC1     | 0.140281668  | 0.003225115 |
| AC079630.2 | ST8SIA4  | 0.217840172  | 4.09E-06    |
| AC079630.2 | UBTD1    | 0.267580207  | 1.24E-08    |
| AC079630.2 | EPHA2    | 0.217402172  | 4.28E-06    |
| AC079630.2 | TMEM130  | 0.415216391  | 1.00E-19    |
| AC079630.2 | SPINK2   | 0.368460445  | 1.46E-15    |
| AC079630.2 | MMP16    | 0.288188837  | 7.65E-10    |
| AC079630.2 | SIGLEC15 | 0.393442196  | 1.05E-17    |
| AC079630.2 | RIN1     | 0.32891909   | 1.55E-12    |
| AC079630.2 | IL1RN    | 0.095078651  | 0.046486219 |
| AC079630.2 | FCER1G   | 0.251364061  | 9.42E-08    |
| AC079630.2 | CD276    | 0.269833468  | 9.22E-09    |
| AC079630.2 | CTSB     | 0.349479139  | 4.68E-14    |
| AC079630.2 | FAM171A2 | 0.46207198   | 1.32E-24    |
| AC079630.2 | ASPHD1   | 0.333693901  | 7.05E-13    |
| AC079630.2 | C15orf48 | 0.038650958  | 0.419193932 |
| AC079630.2 | DYSF     | 0.449027434  | 3.61E-23    |
| AC079630.2 | PDZRN4   | 0.410497039  | 2.83E-19    |
| AC079630.2 | EFHD2    | 0.407620394  | 5.29E-19    |
| AC079630.2 | ASF1B    | 0.239938825  | 3.63E-07    |
| AC079630.2 | AQP1     | 0.394645775  | 8.21E-18    |
| AC079630.2 | ARRDC2   | 0.270489759  | 8.46E-09    |
| AC079630.2 | PRSS1    | 0.349837128  | 4.39E-14    |
| AC079630.2 | MAPK13   | 0.579950466  | 8.14E-41    |
| AC079630.2 | CST5     | 0.053641888  | 0.262064226 |
| AC079630.2 | AHR      | 0.23619476   | 5.57E-07    |
| AC079630.2 | BAX      | 0.158004858  | 0.000893678 |
| AC079630.2 | C1orf115 | 0.474437895  | 5.05E-26    |
| AC079630.2 | PLK3     | 0.296263542  | 2.41E-10    |
| AC079630.2 | JAG2     | 0.344767446  | 1.07E-13    |
| AC079630.2 | RAD23B   | 0.485606827  | 2.35E-27    |
| AC079630.2 | CA12     | 0.369105601  | 1.29E-15    |
| AC079630.2 | ADTRP    | 0.334103959  | 6.58E-13    |
| AC079630.2 | UCP2     | 0.240385832  | 3.45E-07    |
| AC079630.2 | IGFBP2   | 0.102706066  | 0.031437698 |
| AC079630.2 | LOXL2    | 0.276317374  | 3.91E-09    |
| AC079630.2 | GPX1     | 0.254707925  | 6.27E-08    |
| AC079630.2 | P3H3     | 0.316170066  | 1.20E-11    |
| AC079630.2 | C2orf81  | 0.373389436  | 5.69E-16    |
| AC079630.2 | CDT1     | 0.21949097   | 3.44E-06    |
| AC079630.2 | SNX25    | 0.613438966  | 9.84E-47    |
| AC079630.2 | MTHFD1L  | 0.258136893  | 4.10E-08    |
| AC079630.2 | CDC42BPG | 0.319007433  | 7.67E-12    |

|            |          |             |             |
|------------|----------|-------------|-------------|
| AC079630.2 | MSN      | 0.468731411 | 2.32E-25    |
| AC079630.2 | SIGLEC6  | 0.353549903 | 2.27E-14    |
| AC079630.2 | F2R      | 0.216819141 | 4.55E-06    |
| AC079630.2 | TMEM184A | 0.227917934 | 1.40E-06    |
| AC079630.2 | CKS2     | 0.116110033 | 0.014929816 |
| AC079630.2 | TAX1BP3  | 0.116937098 | 0.014224844 |
| AC079630.2 | PMEP1    | 0.228040412 | 1.38E-06    |
| AC079630.2 | CXCL16   | 0.27588448  | 4.14E-09    |
| AC079630.2 | FAXC     | 0.313878296 | 1.71E-11    |
| AC079630.2 | VTCN1    | 0.099801138 | 0.036588576 |
| AC079630.2 | SH2D4A   | 0.467344576 | 3.34E-25    |
| AC079630.2 | RNF24    | 0.384235896 | 6.80E-17    |
| AC079630.2 | LY6G6C   | 0.114127974 | 0.016745429 |
| AC079630.2 | NID1     | 0.302763759 | 9.28E-11    |
| AC079630.2 | STAC     | 0.197758547 | 3.01E-05    |
| AC079630.2 | RAB34    | 0.329057525 | 1.52E-12    |
| AC079630.2 | HES4     | 0.15360734  | 0.001244694 |
| AC079630.2 | EPA10    | 0.343140335 | 1.42E-13    |
| AC079630.2 | ENTPD2   | 0.390365274 | 1.98E-17    |
| AC079630.2 | DDB2     | 0.258764462 | 3.79E-08    |
| AC079630.2 | NKAIN4   | 0.283641252 | 1.44E-09    |
| AC079630.2 | TRIM29   | 0.109075861 | 0.02227177  |
| AC079630.2 | ADCY8    | 0.351847278 | 3.07E-14    |
| AC079630.2 | SFTA2    | 0.148753311 | 0.001776561 |
| AC079630.2 | NRIP1    | 0.410528882 | 2.81E-19    |
| AC079630.2 | VWA1     | 0.324101514 | 3.40E-12    |
| AC079630.2 | APLNR    | 0.237932577 | 4.57E-07    |
| AC079630.2 | REN      | 0.517694959 | 1.82E-31    |
| AC079630.2 | EDIL3    | 0.397982263 | 4.10E-18    |
| AC079630.2 | AGRN     | 0.307497224 | 4.56E-11    |
| AC079630.2 | TREM1    | 0.424894166 | 1.14E-20    |
| AC079630.2 | SRL      | 0.465267976 | 5.77E-25    |
| AC079630.2 | RASGRF1  | 0.452848446 | 1.39E-23    |
| AC079630.2 | RMI2     | 0.223124329 | 2.34E-06    |
| AC079630.2 | SAMD1    | 0.197401892 | 3.11E-05    |
| AC079630.2 | MGAT4B   | 0.276544033 | 3.79E-09    |
| AC079630.2 | NXN      | 0.1647306   | 0.000529539 |
| AC079630.2 | SH3BGRL3 | 0.169324708 | 0.000366089 |
| AC079630.2 | CA11     | 0.467413369 | 3.28E-25    |
| AC079630.2 | PLD3     | 0.552933886 | 1.62E-36    |
| AC079630.2 | LURAP1L  | 0.233187765 | 7.81E-07    |
| AC079630.2 | CARNS1   | 0.360975295 | 5.88E-15    |
| AC079630.2 | PDLIM7   | 0.308024512 | 4.21E-11    |
| AC079630.2 | BCL2L1   | 0.210044536 | 9.08E-06    |
| AC079630.2 | GGT6     | 0.315403566 | 1.35E-11    |
| AC079630.2 | DPYSL3   | 0.310910873 | 2.71E-11    |
| AC079630.2 | FYN      | 0.41067987  | 2.72E-19    |
| AC079630.2 | TK1      | 0.15427973  | 0.001183868 |
| AC079630.2 | AK1      | 0.465619242 | 5.26E-25    |
| AC079630.2 | HIGD1B   | 0.435457018 | 9.69E-22    |
| AC079630.2 | TMEM59L  | 0.094363709 | 0.048164612 |

|            |          |              |             |
|------------|----------|--------------|-------------|
| AC079630.2 | MEGF9    | 0.416861658  | 6.97E-20    |
| AC079630.2 | ZFP36L1  | 0.323294235  | 3.87E-12    |
| AC079630.2 | ADRA1B   | 0.465288969  | 5.73E-25    |
| AC079630.2 | EPHA4    | 0.306113368  | 5.62E-11    |
| AC079630.2 | TCERG1L  | 0.30385188   | 7.89E-11    |
| AC079630.2 | NGFR     | 0.261494658  | 2.69E-08    |
| AC079630.2 | EBI3     | 0.167080454  | 0.000438951 |
| AC079630.2 | S100A10  | 0.06369597   | 0.182818535 |
| AC079630.2 | S100B    | 0.208446644  | 1.07E-05    |
| AC079630.2 | CD44     | 0.667469502  | 6.25E-58    |
| AC079630.2 | BHLHE41  | 0.279301675  | 2.61E-09    |
| AC079630.2 | FBXO2    | 0.369824515  | 1.12E-15    |
| AC079630.2 | SLC30A2  | -0.022360417 | 0.640338599 |
| AC079630.2 | FRMD5    | 0.229276472  | 1.20E-06    |
| AC079630.2 | SAMD11   | 0.145652063  | 0.002217962 |
| AC079630.2 | SIP1L2   | 0.493432463  | 2.56E-28    |
| AC079630.2 | S100A16  | 0.095352117  | 0.045857336 |
| AC079630.2 | PPL      | 0.163020655  | 0.000606059 |
| AC079630.2 | ARHGD1B  | 0.345120839  | 1.00E-13    |
| AC079630.2 | CDC42EP3 | 0.213698674  | 6.27E-06    |
| AC079630.2 | RUNX2    | 0.484311266  | 3.37E-27    |
| AC079630.2 | LAMC2    | 0.195768824  | 3.63E-05    |
| AC079630.2 | BRINP1   | 0.369550268  | 1.18E-15    |
| AC079630.2 | GPRC5B   | 0.396972083  | 5.07E-18    |
| AC079630.2 | AQP5     | 0.291656739  | 4.68E-10    |
| AC079630.2 | PLAG1    | 0.552332133  | 2.00E-36    |
| AC079630.2 | PTPRU    | 0.103922835  | 0.029471985 |
| AC079630.2 | ANGPTL4  | 0.171315637  | 0.000311049 |
| AC079630.2 | PALM3    | 0.152339225  | 0.001367302 |
| AC079630.2 | ACP5     | 0.231997874  | 8.91E-07    |
| AC079630.2 | DLG4     | 0.621656362  | 2.69E-48    |
| AC079630.2 | ETNK2    | 0.449776984  | 3.00E-23    |
| AC079630.2 | CD109    | 0.372510811  | 6.74E-16    |
| AC079630.2 | SNX22    | 0.397458096  | 4.58E-18    |
| AC079630.2 | TMEM98   | 0.230724369  | 1.03E-06    |
| AC079630.2 | CTHRC1   | 0.083232435  | 0.08151462  |
| AC079630.2 | S100A2   | 0.030240661  | 0.527419387 |
| AC079630.2 | C11orf80 | 0.248107144  | 1.39E-07    |
| AC079630.2 | SREBF1   | 0.39001564   | 2.12E-17    |
| AC079630.2 | PRSS22   | 0.178902982  | 0.000164435 |
| AC079630.2 | CMTM3    | 0.183012141  | 0.000115156 |
| AC079630.2 | RDH5     | 0.418522952  | 4.81E-20    |
| AC079630.2 | MYH10    | 0.514368386  | 5.08E-31    |
| AC079630.2 | EVPL     | 0.266355636  | 1.45E-08    |
| AC079630.2 | SCD      | 0.31745967   | 9.79E-12    |
| AC079630.2 | CD151    | 0.30143678   | 1.13E-10    |
| AC079630.2 | S100A4   | 0.224064511  | 2.12E-06    |
| AC079630.2 | BNIP1    | 0.389450339  | 2.38E-17    |
| AC079630.2 | MAP3K6   | 0.381849448  | 1.09E-16    |
| AC079630.2 | MANEAL   | 0.432967098  | 1.75E-21    |
| AC079630.2 | CD207    | 0.288410949  | 7.42E-10    |

|            |          |             |             |
|------------|----------|-------------|-------------|
| AC079630.2 | CD1A     | 0.309366113 | 3.43E-11    |
| AC079630.2 | C3       | 0.196719928 | 3.32E-05    |
| AC079630.2 | NT5E     | 0.274379492 | 5.06E-09    |
| AC079630.2 | CACNG4   | 0.136956978 | 0.004040986 |
| AC079630.2 | FHOD1    | 0.317736966 | 9.38E-12    |
| AC079630.2 | LEMD1    | 0.331738361 | 9.76E-13    |
| AC079630.2 | ATP11A   | 0.638461284 | 1.22E-51    |
| AC079630.2 | PPAP2C   | 0.212180567 | 7.32E-06    |
| AC079630.2 | DRAM1    | 0.253197761 | 7.54E-08    |
| AC079630.2 | CDA      | 0.31139022  | 2.52E-11    |
| AC079630.2 | CCND2    | 0.507176561 | 4.52E-30    |
| AC079630.2 | LCN6     | 0.284513078 | 1.28E-09    |
| AC079630.2 | CDH4     | 0.243856713 | 2.30E-07    |
| AC079630.2 | MMP11    | 0.230498773 | 1.05E-06    |
| AC079630.2 | B3GAT1   | 0.250854148 | 1.00E-07    |
| AC079630.2 | SPP1     | 0.233719946 | 7.35E-07    |
| AC079630.2 | HLA-DQB1 | 0.148106878 | 0.001861312 |
| AC079630.2 | SDC3     | 0.393257167 | 1.09E-17    |
| AC079630.2 | CX3CL1   | 0.266858528 | 1.36E-08    |
| AC079630.2 | SDK1     | 0.314191903 | 1.63E-11    |
| AC079630.2 | DOCK9    | 0.489365004 | 8.16E-28    |
| AC079630.2 | CSF2     | 0.334996695 | 5.67E-13    |
| AC079630.2 | GRHL3    | 0.340448649 | 2.25E-13    |
| AC079630.2 | TMEM92   | 0.280327342 | 2.27E-09    |
| AC079630.2 | BASP1    | 0.19001915  | 6.16E-05    |
| AC079630.2 | HRH1     | 0.230588132 | 1.04E-06    |
| AC079630.2 | ESM1     | 0.243248718 | 2.47E-07    |
| AC079630.2 | B4GALNT3 | 0.150540701 | 0.00156029  |
| AC079630.2 | LMO3     | 0.533496496 | 1.17E-33    |
| AC079630.2 | C9orf16  | 0.120267204 | 0.011673849 |
| AC079630.2 | SEMA3F   | 0.414307768 | 1.23E-19    |
| AC079630.2 | PLA2G12B | 0.685834145 | 2.71E-62    |
| AC079630.2 | KLK6     | 0.214577482 | 5.73E-06    |
| AC079630.2 | ST3GAL5  | 0.653114643 | 9.88E-55    |
| AC079630.2 | FAM132B  | 0.350199967 | 4.12E-14    |
| AC079630.2 | CDKN1A   | 0.139973806 | 0.003293832 |
| AC079630.2 | E2F1     | 0.237762441 | 4.66E-07    |
| AC079630.2 | B3GNT8   | 0.36890887  | 1.34E-15    |
| AC079630.2 | MTMR11   | 0.414744846 | 1.11E-19    |
| AC079630.2 | MYO1G    | 0.191243863 | 5.51E-05    |
| AC079630.2 | TMSB10   | 0.154128883 | 0.001197271 |
| AC079630.2 | UNC5CL   | 0.302427387 | 9.76E-11    |
| AC079630.2 | ABR      | 0.410711146 | 2.70E-19    |
| AC079630.2 | PLP2     | 0.306457612 | 5.34E-11    |
| AC079630.2 | SRCIN1   | 0.457053275 | 4.80E-24    |
| AC079630.2 | PDE9A    | 0.224819381 | 1.95E-06    |
| AC079630.2 | TREM2    | 0.242706466 | 2.63E-07    |
| AC079630.2 | KDEL3    | 0.39396608  | 9.45E-18    |
| AC079630.2 | PC       | 0.323451109 | 3.78E-12    |
| AC079630.2 | C2CD4A   | 0.171120111 | 0.000316091 |
| AC079630.2 | PELI1    | 0.311587873 | 2.44E-11    |

|            |          |             |             |
|------------|----------|-------------|-------------|
| AC079630.2 | SSX1     | 0.250390333 | 1.06E-07    |
| AC079630.2 | MROH6    | 0.328671367 | 1.62E-12    |
| AC079630.2 | ESPN     | 0.437348092 | 6.18E-22    |
| AC079630.2 | BMP1     | 0.491445789 | 4.52E-28    |
| AC079630.2 | TM4SF4   | 0.357592608 | 1.09E-14    |
| AC079630.2 | CORO2A   | 0.522477772 | 4.06E-32    |
| AC079630.2 | CD164L2  | 0.371668405 | 7.92E-16    |
| AC079630.2 | CTSS     | 0.313982902 | 1.69E-11    |
| AC079630.2 | CLU      | 0.209614124 | 9.48E-06    |
| AC079630.2 | TMSB4X   | 0.26206393  | 2.51E-08    |
| AC079630.2 | WNT10A   | 0.163043284 | 0.000604982 |
| AC079630.2 | NAPSA    | 0.345878475 | 8.80E-14    |
| AC079630.2 | PLEKHA4  | 0.325255874 | 2.82E-12    |
| AC079630.2 | SFTPA1   | 0.442876941 | 1.63E-22    |
| AC079630.2 | C1orf116 | 0.3322526   | 8.96E-13    |
| AC079630.2 | TM4SF1   | 0.103291721 | 0.030477997 |
| AC079630.2 | SEL1L3   | 0.193712507 | 4.39E-05    |
| AC079630.2 | VASN     | 0.267626943 | 1.23E-08    |
| AC079630.2 | NPTXR    | 0.34494198  | 1.04E-13    |
| AC079630.2 | PDE4C    | 0.276347585 | 3.89E-09    |
| AC079630.2 | CDC42EP1 | 0.204633787 | 1.55E-05    |
| AC079630.2 | ENDOD1   | 0.431027302 | 2.75E-21    |
| AC079630.2 | RYR1     | 0.457420923 | 4.37E-24    |
| AC079630.2 | IL1RAP   | 0.466567651 | 4.10E-25    |
| AC079630.2 | SLC35F2  | 0.353404699 | 2.33E-14    |
| AC079630.2 | ISYNA1   | 0.431244246 | 2.61E-21    |
| AC079630.2 | HLA-G    | 0.08090868  | 0.090423376 |
| AC079630.2 | CDKN2B   | 0.22609317  | 1.70E-06    |
| AC079630.2 | ALDH1A3  | 0.190606153 | 5.84E-05    |
| AC079630.2 | CLIP3    | 0.371896505 | 7.58E-16    |
| AC079630.2 | ULBP2    | 0.377583131 | 2.53E-16    |
| AC079630.2 | ETHE1    | 0.203093057 | 1.80E-05    |
| AC079630.2 | XPR1     | 0.444478147 | 1.11E-22    |
| AC079630.2 | SPTBN2   | 0.300392984 | 1.32E-10    |
| AC079630.2 | IVL      | 0.373169093 | 5.94E-16    |
| AC079630.2 | MARCO    | 0.184668329 | 9.95E-05    |
| AC079630.2 | PLXND1   | 0.419878511 | 3.54E-20    |
| AC079630.2 | EMILIN2  | 0.472365763 | 8.81E-26    |
| AC079630.2 | PLAUR    | 0.210934295 | 8.30E-06    |
| AC079630.2 | CDC42EP5 | 0.175324444 | 0.000222835 |
| AC079630.2 | TRPC5    | 0.663848138 | 4.16E-57    |
| AC079630.2 | TMEM100  | 0.385454155 | 5.33E-17    |
| AC079630.2 | QSOX1    | 0.321929598 | 4.82E-12    |
| AC079630.2 | ARHGAP23 | 0.378283747 | 2.20E-16    |
| AC079630.2 | MDF1     | 0.235170751 | 6.25E-07    |
| AC079630.2 | FSTL3    | 0.079105972 | 0.0978589   |
| AC079630.2 | INF2     | 0.363077001 | 3.99E-15    |
| AC079630.2 | TGFBR1   | 0.421486048 | 2.47E-20    |
| AC079630.2 | TGFBI    | 0.258586595 | 3.88E-08    |
| AC079630.2 | ERBB3    | 0.222983411 | 2.38E-06    |
| AC079630.2 | CCL18    | 0.185526883 | 9.22E-05    |



|            |           |             |             |
|------------|-----------|-------------|-------------|
| AC079630.2 | CCL17     | 0.187288819 | 7.88E-05    |
| AC079630.2 | C16orf45  | 0.420586999 | 3.02E-20    |
| AC079630.2 | PRDM1     | 0.543549578 | 4.10E-35    |
| AC079630.2 | TRIM47    | 0.162824775 | 0.00061545  |
| AC079630.2 | CNFN      | 0.146112545 | 0.002146641 |
| AC079630.2 | ARMCX3    | 0.480033531 | 1.10E-26    |
| AC079630.2 | RAMP1     | 0.28665456  | 9.49E-10    |
| AC079630.2 | GABRD     | 0.348337686 | 5.72E-14    |
| AC079630.2 | COL13A1   | 0.575364089 | 4.67E-40    |
| AC079630.2 | S100A5    | 0.277473719 | 3.35E-09    |
| AC079630.2 | MISP      | 0.015006965 | 0.753861307 |
| AC079630.2 | HES6      | 0.370627184 | 9.66E-16    |
| AC079630.2 | PSD3      | 0.641544731 | 2.82E-52    |
| AC079630.2 | DOK7      | 0.162021112 | 0.000655413 |
| AC079630.2 | ZMAT3     | 0.390156344 | 2.06E-17    |
| AC079630.2 | MFAP2     | 0.275145354 | 4.57E-09    |
| AC079630.2 | TMEM79    | 0.391261202 | 1.65E-17    |
| AC079630.2 | SLC1A5    | 0.241795148 | 2.93E-07    |
| AC079630.2 | BBC3      | 0.197226862 | 3.16E-05    |
| AC079630.2 | HLA-DQB2  | 0.185296961 | 9.41E-05    |
| AC079630.2 | C1QL1     | 0.319098837 | 7.56E-12    |
| AC079630.2 | TMEM215   | 0.528738864 | 5.50E-33    |
| AC079630.2 | PNP       | 0.227384618 | 1.48E-06    |
| AC079630.2 | ARNTL     | 0.326970996 | 2.14E-12    |
| AC079630.2 | CLDN2     | 0.452121677 | 1.67E-23    |
| AC079630.2 | MVP       | 0.309869559 | 3.18E-11    |
| AC079630.2 | LGALS1    | 0.189590937 | 6.41E-05    |
| AC079630.2 | BIRC7     | 0.352302915 | 2.83E-14    |
| AC079630.2 | COL8A1    | 0.518547969 | 1.39E-31    |
| AC079630.2 | PERP      | 0.181070501 | 0.000136399 |
| AC079630.2 | GJA4      | 0.363606203 | 3.62E-15    |
| AC079630.2 | IGFL2     | 0.303639184 | 8.15E-11    |
| AC079630.2 | DAPK2     | 0.267355959 | 1.27E-08    |
| AC079630.2 | MAMLD1    | 0.394789529 | 7.97E-18    |
| AC079630.2 | ETV5      | 0.693084779 | 4.16E-64    |
| AC079630.2 | RUNX1     | 0.241029073 | 3.20E-07    |
| AC079630.2 | LONRF2    | 0.487649953 | 1.32E-27    |
| AC079630.2 | SPOCK1    | 0.413230214 | 1.56E-19    |
| AC079630.2 | XKRX      | 0.53841265  | 2.31E-34    |
| AC079630.2 | TGFB1     | 0.389693948 | 2.27E-17    |
| AC079630.2 | ERP27     | 0.158694127 | 0.000847796 |
| AC079630.2 | TNFRSF10C | 0.438873433 | 4.29E-22    |
| AC079630.2 | PALM      | 0.172585667 | 0.000280081 |
| AC079630.2 | TSC22D1   | 0.515930464 | 3.14E-31    |
| AC079630.2 | TGM2      | 0.17670057  | 0.000198394 |
| AC079630.2 | UBE2QL1   | 0.528094471 | 6.77E-33    |
| AC079630.2 | ECE1      | 0.436426278 | 7.70E-22    |
| AC079630.2 | COL8A2    | 0.281789822 | 1.86E-09    |
| AC079630.2 | HIST3H2A  | 0.151274294 | 0.001478738 |
| AC079630.2 | TNFRSF21  | 0.234052772 | 7.09E-07    |
| AC079630.2 | SOX4      | 0.192738354 | 4.80E-05    |

|            |            |             |             |
|------------|------------|-------------|-------------|
| AC079630.2 | ELF3       | 0.121951689 | 0.010544616 |
| AC079630.2 | TPD52L1    | 0.362503118 | 4.44E-15    |
| AC079630.2 | INHBB      | 0.336293676 | 4.56E-13    |
| AC079630.2 | HPN        | 0.415182633 | 1.01E-19    |
| AC079630.2 | MMP7       | 0.113329212 | 0.017530036 |
| AC079630.2 | RAB27A     | 0.57955055  | 9.49E-41    |
| AC079630.2 | IGF2BP2    | 0.511776909 | 1.12E-30    |
| AC079630.2 | ITGB4      | 0.261694226 | 2.63E-08    |
| AC079630.2 | PPP1R1B    | 0.443682641 | 1.34E-22    |
| AC079630.2 | NPDC1      | 0.375889994 | 3.51E-16    |
| AC079630.2 | CCL13      | 0.293842518 | 3.42E-10    |
| AC079630.2 | SPINT1     | 0.29294457  | 3.89E-10    |
| AC079630.2 | HEY2       | 0.624558467 | 7.37E-49    |
| AC079630.2 | CST2       | 0.041450717 | 0.386278955 |
| AC079630.2 | ADM        | 0.514470865 | 4.93E-31    |
| AC079630.2 | VSTM2L     | 0.153790313 | 0.001227863 |
| AC079630.2 | FAM84A     | 0.336358638 | 4.51E-13    |
| AC079630.2 | P4HA2      | 0.513951308 | 5.78E-31    |
| AC079630.2 | LPL        | 0.478365216 | 1.74E-26    |
| AC079630.2 | TMEM173    | 0.464112411 | 7.80E-25    |
| AC079630.2 | DHRS3      | 0.357714194 | 1.07E-14    |
| AC079630.2 | SCN1B      | 0.407613302 | 5.30E-19    |
| AC079630.2 | GLT1D1     | 0.646913778 | 2.11E-53    |
| AC079630.2 | PHYHIP     | 0.485623139 | 2.34E-27    |
| AC079630.2 | BHLHE40    | 0.360115535 | 6.89E-15    |
| AC079630.2 | BID        | 0.310724922 | 2.79E-11    |
| AC079630.2 | POSTN      | 0.14293754  | 0.002684211 |
| AC079630.2 | ITGA3      | 0.282765252 | 1.63E-09    |
| AC079630.2 | RSP04      | 0.233641509 | 7.42E-07    |
| AC079630.2 | ADAMTS9    | 0.699675206 | 8.40E-66    |
| AC079630.2 | ABTB2      | 0.326209177 | 2.42E-12    |
| AC079630.2 | KCNQ3      | 0.331566522 | 1.00E-12    |
| AC079630.2 | ANXA1      | 0.365166295 | 2.70E-15    |
| AC079630.2 | S100A11    | 0.243842529 | 2.31E-07    |
| AC079630.2 | CEACAM6    | 0.182633427 | 0.000119039 |
| AC079630.2 | IER5L      | 0.261213106 | 2.79E-08    |
| AC079630.2 | KRT80      | 0.165739858 | 0.000488691 |
| AC079630.2 | CDH6       | 0.24720774  | 1.55E-07    |
| AC079630.2 | UNC5B      | 0.344607026 | 1.10E-13    |
| AC079630.2 | PLEKHN1    | 0.332632517 | 8.41E-13    |
| AC079630.2 | SYTL1      | 0.322920913 | 4.11E-12    |
| AC079630.2 | TMEM163    | 0.215346068 | 5.30E-06    |
| AC079630.2 | C4orf48    | 0.308188478 | 4.11E-11    |
| AC079630.2 | B3GNT7     | 0.56490485  | 2.26E-38    |
| AC079630.2 | BAIAP3     | 0.379456688 | 1.75E-16    |
| AC079630.2 | PHLDA2     | 0.314001058 | 1.68E-11    |
| AC079630.2 | GAP43      | 0.270734733 | 8.20E-09    |
| AC079630.2 | S100A1     | 0.245631621 | 1.87E-07    |
| AC079630.2 | PTPRE      | 0.426337524 | 8.15E-21    |
| AC079630.2 | CCND1      | 0.437919067 | 5.40E-22    |
| AC079630.2 | ST6GALNAC5 | 0.148267404 | 0.001839927 |

|            |         |             |             |
|------------|---------|-------------|-------------|
| AC079630.2 | KRT17   | 0.216561206 | 4.67E-06    |
| AC079630.2 | HPCAL4  | 0.59786443  | 6.79E-44    |
| AC079630.2 | GABBR2  | 0.491823223 | 4.06E-28    |
| AC079630.2 | DIRAS3  | 0.548634237 | 7.21E-36    |
| AC079630.2 | SERINC2 | 0.279328412 | 2.60E-09    |
| AC079630.2 | PTCHD4  | 0.373867364 | 5.19E-16    |
| AC079630.2 | EPS8    | 0.622328681 | 2.00E-48    |
| AC079630.2 | LY6E    | 0.263358782 | 2.13E-08    |
| AC079630.2 | UPP1    | 0.212631119 | 6.99E-06    |
| AC079630.2 | AHNAK2  | 0.249405117 | 1.19E-07    |
| AC079630.2 | PLXNC1  | 0.526188078 | 1.25E-32    |
| AC079630.2 | TNC     | 0.185627518 | 9.14E-05    |
| AC079630.2 | DUSP4   | 0.546216371 | 1.66E-35    |
| AC079630.2 | NRCAM   | 0.517776575 | 1.77E-31    |
| AC079630.2 | NRP2    | 0.576192147 | 3.41E-40    |
| AC079630.2 | CTSC    | 0.424428365 | 1.26E-20    |
| AC079630.2 | AMIG02  | 0.531076857 | 2.58E-33    |
| AC079630.2 | NAB2    | 0.39553837  | 6.83E-18    |
| AC079630.2 | TBC1D2  | 0.237856906 | 4.61E-07    |
| AC079630.2 | PHLDA3  | 0.189984967 | 6.18E-05    |
| AC079630.2 | PTP4A3  | 0.327330701 | 2.01E-12    |
| AC079630.2 | CRABP2  | 0.392952354 | 1.16E-17    |
| AC079630.2 | GOS2    | 0.385838327 | 4.94E-17    |
| AC079630.2 | S100A6  | 0.17243241  | 0.000283659 |
| AC079630.2 | FOXQ1   | 0.245852323 | 1.82E-07    |
| AC079630.2 | LRG1    | 0.369487504 | 1.20E-15    |
| AC079630.2 | LAMP5   | 0.207358665 | 1.19E-05    |
| AC079630.2 | ALDH3B1 | 0.211828947 | 7.59E-06    |
| AC079630.2 | CDH2    | 0.414232097 | 1.25E-19    |
| AC079630.2 | SCG5    | 0.523058533 | 3.38E-32    |
| AC079630.2 | ZCCHC16 | 0.661055683 | 1.77E-56    |
| AC079630.2 | GRB7    | 0.255173229 | 5.92E-08    |
| AC079630.2 | TIAM1   | 0.394111962 | 9.17E-18    |
| AC079630.2 | FXD5    | 0.410405198 | 2.89E-19    |
| AC079630.2 | CLDN9   | 0.199060278 | 2.66E-05    |
| AC079630.2 | FAM43A  | 0.347680119 | 6.42E-14    |
| AC079630.2 | CHST2   | 0.399475832 | 3.00E-18    |
| AC079630.2 | HMGA2   | 0.582151318 | 3.49E-41    |
| AC079630.2 | GALNT7  | 0.662612282 | 7.91E-57    |
| AC079630.2 | CBLN1   | 0.234414959 | 6.80E-07    |
| AC079630.2 | STRA6   | 0.299919524 | 1.41E-10    |
| AC079630.2 | MUC21   | 0.392738897 | 1.22E-17    |
| AC079630.2 | PRR36   | 0.417255758 | 6.38E-20    |
| AC079630.2 | NFE2L3  | 0.300264123 | 1.34E-10    |
| AC079630.2 | NR1D1   | 0.246485707 | 1.69E-07    |
| AC079630.2 | MUC1    | 0.111728329 | 0.019199736 |
| AC079630.2 | NAT8L   | 0.564371817 | 2.74E-38    |
| AC079630.2 | APOC1   | 0.354710957 | 1.84E-14    |
| AC079630.2 | EVA1A   | 0.18971767  | 6.33E-05    |
| AC079630.2 | ENTPD1  | 0.530657296 | 2.96E-33    |
| AC079630.2 | COL1A1  | 0.197014245 | 3.23E-05    |

|            |           |             |             |
|------------|-----------|-------------|-------------|
| AC079630.2 | FNDC4     | 0.328843064 | 1.57E-12    |
| AC079630.2 | FRMD3     | 0.671064138 | 9.25E-59    |
| AC079630.2 | SHROOM4   | 0.565082929 | 2.12E-38    |
| AC079630.2 | NELL2     | 0.512278099 | 9.65E-31    |
| AC079630.2 | EPHB3     | 0.326257757 | 2.40E-12    |
| AC079630.2 | TMC6      | 0.388845464 | 2.69E-17    |
| AC079630.2 | NOD1      | 0.459563762 | 2.53E-24    |
| AC079630.2 | GGCT      | 0.369802813 | 1.13E-15    |
| AC079630.2 | ICAM1     | 0.416451103 | 7.63E-20    |
| AC079630.2 | PRSS23    | 0.47574686  | 3.54E-26    |
| AC079630.2 | CFI       | 0.443055781 | 1.56E-22    |
| AC079630.2 | CD55      | 0.208824008 | 1.03E-05    |
| AC079630.2 | RASD2     | 0.315691216 | 1.29E-11    |
| AC079630.2 | KLK11     | 0.302587433 | 9.53E-11    |
| AC079630.2 | ICAM5     | 0.413793387 | 1.38E-19    |
| AC079630.2 | ADORA1    | 0.43011726  | 3.40E-21    |
| AC079630.2 | ITGA2     | 0.295105281 | 2.85E-10    |
| AC079630.2 | ABCC3     | 0.465119471 | 5.99E-25    |
| AC079630.2 | MFGE8     | 0.35281116  | 2.59E-14    |
| AC079630.2 | STK32A    | 0.535847768 | 5.40E-34    |
| AC079630.2 | CYSLTR2   | 0.47059121  | 1.41E-25    |
| AC079630.2 | LAD1      | 0.325043257 | 2.92E-12    |
| AC079630.2 | MGAT3     | 0.118365279 | 0.01307621  |
| AC079630.2 | IGFBP6    | 0.399727456 | 2.85E-18    |
| AC079630.2 | CYP2S1    | 0.143582201 | 0.002566042 |
| AC079630.2 | KCNJ2     | 0.585273203 | 1.04E-41    |
| AC079630.2 | FAM20A    | 0.470917015 | 1.30E-25    |
| AC079630.2 | TGFA      | 0.683951668 | 7.84E-62    |
| AC079630.2 | MXRA8     | 0.212649204 | 6.98E-06    |
| AC079630.2 | C8orf4    | 0.348608316 | 5.46E-14    |
| AC079630.2 | CLDN10    | 0.325096377 | 2.90E-12    |
| AC079630.2 | PDE5A     | 0.522992861 | 3.45E-32    |
| AC079630.2 | APOE      | 0.393049939 | 1.14E-17    |
| AC079630.2 | SPOCK2    | 0.120196994 | 0.011723154 |
| AC079630.2 | TENM1     | 0.740041144 | 2.69E-77    |
| AC079630.2 | SLIT1     | 0.69897303  | 1.28E-65    |
| AC079630.2 | CXCL14    | 0.174718294 | 0.000234471 |
| AC079630.2 | ECM1      | 0.606384653 | 1.99E-45    |
| AC079630.2 | DUSP5     | 0.242508884 | 2.69E-07    |
| AC079630.2 | SEZ6L2    | 0.383937891 | 7.22E-17    |
| AC079630.2 | THRSP     | 0.486026743 | 2.09E-27    |
| AC079630.2 | C19orf33  | 0.083753553 | 0.079617542 |
| AC079630.2 | MPZL2     | 0.56151354  | 7.71E-38    |
| AC079630.2 | CTSH      | 0.406229871 | 7.14E-19    |
| AC079630.2 | CYP1B1    | 0.447673576 | 5.05E-23    |
| AC079630.2 | ALOX5     | 0.191191666 | 5.54E-05    |
| AC079630.2 | SYTL5     | 0.435385015 | 9.86E-22    |
| AC079630.2 | TNFRSF12A | 0.261989677 | 2.53E-08    |
| AC079630.2 | DUSP6     | 0.40463439  | 1.01E-18    |
| AC079630.2 | ALOX15B   | 0.272204172 | 6.76E-09    |
| AC079630.2 | SDC4      | 0.446587228 | 6.59E-23    |

|            |          |             |             |
|------------|----------|-------------|-------------|
| AC079630.2 | MDK      | 0.362538153 | 4.41E-15    |
| AC079630.2 | KRT19    | 0.098615204 | 0.038888608 |
| AC079630.2 | MET      | 0.448564541 | 4.05E-23    |
| AC079630.2 | TESC     | 0.558784975 | 2.05E-37    |
| AC079630.2 | CXCL17   | 0.228431117 | 1.32E-06    |
| AC079630.2 | NPC2     | 0.492679508 | 3.18E-28    |
| AC079630.2 | COMP     | 0.219989607 | 3.27E-06    |
| AC079630.2 | TUSC3    | 0.4957248   | 1.32E-28    |
| AC079630.2 | TMPRSS4  | 0.254327015 | 6.57E-08    |
| AC079630.2 | LGALS3   | 0.267373405 | 1.27E-08    |
| AC079630.2 | CRLF1    | 0.093499482 | 0.05026091  |
| AC079630.2 | CTXN1    | 0.206283735 | 1.32E-05    |
| AC079630.2 | PCSK1N   | 0.284856178 | 1.22E-09    |
| AC079630.2 | NMU      | 0.196324082 | 3.44E-05    |
| AC079630.2 | GALE     | 0.422061491 | 2.16E-20    |
| AC079630.2 | PCSK2    | 0.404554747 | 1.02E-18    |
| AC079630.2 | GJB3     | 0.378379134 | 2.16E-16    |
| AC079630.2 | SLPI     | 0.117153545 | 0.014045251 |
| AC079630.2 | AGR2     | 0.322871057 | 4.15E-12    |
| AC079630.2 | MRC2     | 0.31779278  | 9.29E-12    |
| AC079630.2 | GOLT1A   | 0.498426487 | 6.03E-29    |
| AC079630.2 | SLC27A6  | 0.250006915 | 1.11E-07    |
| AC079630.2 | KCNN4    | 0.239920173 | 3.64E-07    |
| AC079630.2 | ETV4     | 0.331663269 | 9.88E-13    |
| AC079630.2 | SYT12    | 0.375020234 | 4.16E-16    |
| AC079630.2 | PVRL4    | 0.302138673 | 1.02E-10    |
| AC079630.2 | PLCD3    | 0.254454033 | 6.47E-08    |
| AC079630.2 | PLAU     | 0.363915768 | 3.41E-15    |
| AC079630.2 | LRRK2    | 0.911631666 | 7.48E-171   |
| AC079630.2 | SFN      | 0.182934626 | 0.000115941 |
| AC079630.2 | LPAR5    | 0.492578944 | 3.27E-28    |
| AC079630.2 | NGEF     | 0.261373314 | 2.73E-08    |
| AC079630.2 | DTX4     | 0.303626923 | 8.16E-11    |
| AC079630.2 | CST6     | 0.274582465 | 4.93E-09    |
| AC079630.2 | QPCT     | 0.569960858 | 3.52E-39    |
| AC079630.2 | TIMP1    | 0.373162067 | 5.95E-16    |
| AC079630.2 | CAMK2N1  | 0.457576521 | 4.20E-24    |
| AC079630.2 | KLHDC8A  | 0.549711082 | 4.97E-36    |
| AC079630.2 | PDLIM4   | 0.233399886 | 7.62E-07    |
| AC079630.2 | SCEL     | 0.423000964 | 1.75E-20    |
| AC079630.2 | LCN2     | 0.158505055 | 0.00086016  |
| AC079630.2 | PROS1    | 0.383620809 | 7.69E-17    |
| AC079630.2 | GABRB2   | 0.482956841 | 4.92E-27    |
| AC079630.2 | TMPRSS6  | 0.226092957 | 1.70E-06    |
| AC079630.2 | KLK7     | 0.208352734 | 1.08E-05    |
| AC079630.2 | PDZK1IP1 | 0.391403609 | 1.60E-17    |
| AC079630.2 | CDH3     | 0.444752394 | 1.03E-22    |
| AC079630.2 | LRP4     | 0.720629923 | 1.62E-71    |
| AC079630.2 | IGSF1    | 0.426005052 | 8.80E-21    |
| AC079630.2 | B3GNT3   | 0.161059512 | 0.000706386 |
| AC079630.2 | CLDN1    | 0.380973022 | 1.30E-16    |

|            |          |             |          |
|------------|----------|-------------|----------|
| AC079630.2 | GDF15    | 0.203820764 | 1.68E-05 |
| AC079630.2 | ARHGAP36 | 0.425625953 | 9.60E-21 |
| AC079630.2 | LAMB3    | 0.328199184 | 1.75E-12 |
| AC079630.2 | KLK10    | 0.26326758  | 2.15E-08 |
| AC079630.2 | DPP4     | 0.455780125 | 6.64E-24 |
| AC079630.2 | METTL7B  | 0.482279416 | 5.93E-27 |
| AC079630.2 | LIPH     | 0.479167885 | 1.40E-26 |
| AC079630.2 | CLDN16   | 0.399579801 | 2.94E-18 |
| AC079630.2 | CHI3L1   | 0.396583939 | 5.49E-18 |
| AC079630.2 | SLC22A31 | 0.492254022 | 3.59E-28 |
| AC079630.2 | TACSTD2  | 0.248977684 | 1.26E-07 |
| AC079630.2 | SFTPB    | 0.206902438 | 1.24E-05 |
| AC079630.2 | RXRG     | 0.640041162 | 5.77E-52 |
| AC079630.2 | DCSTAMP  | 0.300022588 | 1.39E-10 |
| AC079630.2 | CITED1   | 0.515328994 | 3.78E-31 |
| AC079630.2 | SERPINA1 | 0.360315671 | 6.64E-15 |
| AC079630.2 | PRR15    | 0.557822169 | 2.89E-37 |
| AC079630.2 | SLC34A2  | 0.265785797 | 1.56E-08 |
| AC079630.2 | FN1      | 0.288138696 | 7.70E-10 |
| AC079630.2 | ZCCHC12  | 0.626124162 | 3.64E-49 |

Supplementary Table S7 Functional enrichment analysis of diagnostic signature lncRNAs

| ONTOL<br>OGY | ID         | Description                                                             | GeneRatio | BgRatio   | pvalue      | p.adjust    | qvalue      | geneID                                                                                                          | Count |
|--------------|------------|-------------------------------------------------------------------------|-----------|-----------|-------------|-------------|-------------|-----------------------------------------------------------------------------------------------------------------|-------|
| BP           | GO:0050890 | cognition                                                               | 16/255    | 296/18670 | 3.35E-06    | 0.011133408 | 0.009847948 | ADCY8/RASGRF1/BRINP1/ITGA3/SHROOM4/TUSC3/RIN1/C1QL1/PPP1R1B/STRA6/APOE/MDK/KIT/DGKI/KCNK2/ADORA1                | 16    |
| BP           | GO:0046688 | response to copper ion                                                  | 6/255     | 42/18670  | 2.13E-05    | 0.015198194 | 0.013443416 | MT1G/MT1H/MT1F/SOD3/MT1M/MAP1LC3A                                                                               | 6     |
| BP           | GO:0031346 | positive regulation of cell projection organization                     | 17/255    | 383/18670 | 2.22E-05    | 0.015198194 | 0.013443416 | GPM6A/TGFBR1/ITGA3/EPS8/PLXNC1/FN1/NGFR/ESPN/CDC42EP1/CDC42EP5/TRPC5/PALM/APOE/TNFRSF12A/MDK/KIT/SCN1B          | 17    |
| BP           | GO:0071280 | cellular response to copper ion                                         | 5/255     | 27/18670  | 2.89E-05    | 0.015198194 | 0.013443416 | MT1G/MT1H/MT1F/MT1M/MAP1LC3A                                                                                    | 5     |
| BP           | GO:0120032 | regulation of plasma membrane bounded cell projection assembly          | 11/255    | 175/18670 | 2.97E-05    | 0.015198194 | 0.013443416 | RAP1GAP/GPM6A/TGFBR1/GAP43/EPS8/TACSTD2/ESPN/CDC42EP1/CDC42EP5/PALM/KIT                                         | 11    |
| BP           | GO:0007613 | memory                                                                  | 9/255     | 117/18670 | 3.29E-05    | 0.015198194 | 0.013443416 | ADCY8/RASGRF1/BRINP1/ITGA3/RIN1/PPP1R1B/APOE/MDK/KCNK2                                                          | 9     |
| BP           | GO:0060491 | regulation of cell projection assembly                                  | 11/255    | 177/18670 | 3.30E-05    | 0.015198194 | 0.013443416 | RAP1GAP/GPM6A/TGFBR1/GAP43/EPS8/TACSTD2/ESPN/CDC42EP1/CDC42EP5/PALM/KIT                                         | 11    |
| BP           | GO:0010273 | detoxification of copper ion                                            | 4/255     | 15/18670  | 4.12E-05    | 0.015198194 | 0.013443416 | MT1G/MT1H/MT1F/MT1M                                                                                             | 4     |
| BP           | GO:1990169 | stress response to copper ion                                           | 4/255     | 15/18670  | 4.12E-05    | 0.015198194 | 0.013443416 | MT1G/MT1H/MT1F/MT1M                                                                                             | 4     |
| BP           | GO:0050808 | synapse organization                                                    | 17/255    | 408/18670 | 4.91E-05    | 0.016195028 | 0.014325156 | GPM6A/FLRT1/CHCHD10/MYH10/IL1RAP/SPTBN2/ITGA3/GAP43/NRCAM/NRP2/GABRB2/SDK1/C1QL1/PALM/AMIGO2/APOE/SRCIN1        | 17    |
| BP           | GO:0007611 | learning or memory                                                      | 13/255    | 256/18670 | 5.37E-05    | 0.016195028 | 0.014325156 | ADCY8/RASGRF1/BRINP1/ITGA3/RIN1/C1QL1/PPP1R1B/STRA6/APOE/MDK/KIT/DGKI/KCNK2                                     | 13    |
| BP           | GO:0120034 | positive regulation of plasma membrane bounded cell projection assembly | 8/255     | 100/18670 | 6.84E-05    | 0.016672523 | 0.014747519 | GPM6A/TGFBR1/EPS8/ESPN/CDC42EP1/CDC42EP5/PALM/KIT                                                               | 8     |
| BP           | GO:0061687 | detoxification of inorganic compound                                    | 4/255     | 17/18670  | 7.03E-05    | 0.016672523 | 0.014747519 | MT1G/MT1H/MT1F/MT1M                                                                                             | 4     |
| BP           | GO:0097501 | stress response to metal ion                                            | 4/255     | 17/18670  | 7.03E-05    | 0.016672523 | 0.014747519 | MT1G/MT1H/MT1F/MT1M                                                                                             | 4     |
| BP           | GO:0007409 | axonogenesis                                                            | 18/255    | 468/18670 | 8.25E-05    | 0.018254727 | 0.016147043 | MATN2/RAP1GAP/EPHA10/MYH10/SPTBN2/GAP43/PLXNC1/NRCAM/NRP2/FN1/NCAM1/NGFR/TRPC5/GRB7/APOE/TNFRSF12A/SEMA3D/SCN1B | 18    |
| BP           | GO:0098754 | detoxification                                                          | 9/255     | 137/18670 | 0.000112623 | 0.021940285 | 0.019407067 | TPO/MT1G/MT1H/MT1F/SOD3/MT1M/GSTM3/MARC2/APOE                                                                   | 9     |
| BP           | GO:0007411 | axon guidance                                                           | 13/255    | 276/18670 | 0.000114777 | 0.021940285 | 0.019407067 | MATN2/RAP1GAP/EPHA10/MYH10/SPTBN2/GAP43/PLXNC1/NRCAM/NRP2/NCAM1/GRB7/SEMA3D/SCN1B                               | 13    |
| BP           | GO:0097485 | neuron projection guidance                                              | 13/255    | 277/18670 | 0.000118989 | 0.021940285 | 0.019407067 | MATN2/RAP1GAP/EPHA10/MYH10/SPTBN2/GAP43/PLXNC1/NRCAM/NRP2/NCAM1/GRB7/SEMA3D/SCN1B                               | 13    |

|    |            |                                          |        |           |             |             |             |                                                                                                                                 |    |
|----|------------|------------------------------------------|--------|-----------|-------------|-------------|-------------|---------------------------------------------------------------------------------------------------------------------------------|----|
| BP | GO:0022604 | regulation of cell morphogenesis         | 18/255 | 484/18670 | 0.00012582  | 0.021978742 | 0.019441085 | MYH10/EPS8/PLXNC1/NRCAM/TACSTD2/FN1/NGFR/CDC42EP1/CD42EP5/TRPC5/PALM/ANXA1/APOE/TNFRSF12A/MDK/SEMA3D/KIT/SRCIN1                 | 18 |
| BP | GO:0071526 | semaphorin-plexin signaling pathway      | 5/255  | 40/18670  | 0.000203483 | 0.033768041 | 0.029869195 | PLXNC1/NRP2/MET/NCAM1/SEMA3D                                                                                                    | 5  |
| BP | GO:0008360 | regulation of cell shape                 | 9/255  | 150/18670 | 0.000223718 | 0.035358158 | 0.031275718 | MYH10/EPS8/PLXNC1/FN1/CDC42EP1/CDC42EP5/PALM/ANXA1/KIT                                                                          | 9  |
| BP | GO:0071294 | cellular response to zinc ion            | 4/255  | 23/18670  | 0.00024532  | 0.037009907 | 0.032736757 | MT1G/MT1H/MT1F/MT1M                                                                                                             | 4  |
| BP | GO:0051489 | regulation of filopodium assembly        | 5/255  | 44/18670  | 0.000321248 | 0.045437104 | 0.040190952 | GPM6A/TGFBR1/GAP43/ESPN/PALM                                                                                                    | 5  |
| BP | GO:0042391 | regulation of membrane potential         | 16/255 | 434/18670 | 0.00032856  | 0.045437104 | 0.040190952 | FHL1/GRIN2C/SNTA1/SLC25A33/CHCHD10/KCNQ1/KCNQ3/NRCAM/GABRB2/TRPC5/BID/DGKI/KCNK2/SCN1B/ADORA1/KCNJ2                             | 16 |
| CC | GO:0062023 | collagen-containing extracellular matrix | 22/267 | 406/19717 | 3.94E-08    | 8.14E-06    | 6.38E-06    | MATN2/COL23A1/SOD3/CDON/SDC3/CLU/COL8A1/COL8A2/MFGE8/TIMP1/SERPINA1/FN1/NCAM1/ENTPD2/CD151/ANXA1/APOE/CTSH/MDK/FMOD/CTSC/LGALS3 | 22 |
| CC | GO:0016323 | basolateral plasma membrane              | 16/267 | 217/19717 | 4.72E-08    | 8.14E-06    | 6.38E-06    | CDH16/SLC26A7/SLC4A4/KCNQ1/ADCY8/ERBB3/ITGA3/SHROOM4/NOD1/MET/TACSTD2/PALM/ANXA1/CA11/ADORA1/TGFA                               | 16 |
| CC | GO:0043025 | neuronal cell body                       | 21/267 | 497/19717 | 4.55E-06    | 0.000455308 | 0.000357023 | PPARGC1A/GPM6A/FLRT1/CKB/ADCY8/BRINP1/MYH10/NPTXR/SP                                                                            | 21 |
| CC | GO:0005788 | endoplasmic reticulum lumen              | 16/267 | 309/19717 | 5.28E-06    | 0.000455308 | 0.000357023 | TBN2/CAMK2N1/RIN1/TRPC5/PPP1R1B/APOE/DGKI/KCNK2/RGS8/SRCIN1/SCN1B/ADORA1/KCNJ2                                                  | 16 |
| CC | GO:0150034 | distal axon                              | 13/267 | 285/19717 | 0.000146197 | 0.010087587 | 0.007910023 | COL23A1/WFS1/CLU/QSOX1/COL8A1/COL8A2/MFGE8/MXRA8/TIMP1/SERPINA1/FN1/RDH5/APOE/HYOU1/P4HA2/CTSC                                  | 13 |
| CC | GO:0031091 | platelet alpha granule                   | 7/267  | 91/19717  | 0.000237162 | 0.013337847 | 0.010458663 | GPM6A/KCNIP3/NDRG2/RASGRF1/MYH10/NPTXR/ITGA3/GAP43/EPS8/TRPC5/DGKI/KCNK2/ADORA1                                                 | 7  |
| CC | GO:0031093 | platelet alpha granule lumen             | 6/267  | 67/19717  | 0.000291328 | 0.013337847 | 0.010458663 | CLU/QSOX1/TIMP1/PROS1/SERPINA1/FN1                                                                                              | 6  |
| CC | GO:0005604 | basement membrane                        | 7/267  | 95/19717  | 0.000309283 | 0.013337847 | 0.010458663 | CLU/QSOX1/TIMP1/PROS1/SERPINA1/FN1                                                                                              | 6  |
| CC | GO:0016324 | apical plasma membrane                   | 13/267 | 318/19717 | 0.000421912 | 0.01472814  | 0.011548839 | MATN2/COL8A1/COL8A2/TIMP1/FN1/ENTPD2/CD151                                                                                      | 7  |
| CC | GO:0019897 | extrinsic component of plasma membrane   | 9/267  | 165/19717 | 0.000426903 | 0.01472814  | 0.011548839 | SLC26A4/SLC5A8/SLC29A4/ADCY8/SPTBN2/ERBB3/SHROOM4/NOD1/FN1/ANXA1/SORBS2/KCNK2/RAB27A                                            | 13 |
| CC | GO:0030175 | filopodium                               | 7/267  | 104/19717 | 0.000536426 | 0.0159076   | 0.012473694 | GNA14/SYTL3/STAC/MFGE8/CDH3/PLEKHA4/ANXA1/DGKI/RGS8                                                                             | 9  |
| CC | GO:0030426 | growth cone                              | 9/267  | 171/19717 | 0.000553308 | 0.0159076   | 0.012473694 | IQGAP2/GPM6A/NPTXR/ITGA3/GAP43/PALM/SRCIN1                                                                                      | 7  |
| CC | GO:0030427 | site of polarized growth                 | 9/267  | 176/19717 | 0.000680729 | 0.018065512 | 0.014165786 | GPM6A/NDRG2/RASGRF1/MYH10/NPTXR/ITGA3/GAP43/EPS8/TRPC5                                                                          | 9  |
| CC | GO:0045177 | apical part of cell                      | 14/267 | 384/19717 | 0.000794732 | 0.018626313 | 0.01460553  | GPM6A/NDRG2/RASGRF1/MYH10/NPTXR/ITGA3/GAP43/EPS8/TRPC5                                                                          | 9  |
| CC | GO:0097060 | synaptic membrane                        | 15/267 | 432/19717 | 0.00085694  | 0.018626313 | 0.01460553  | SLC26A4/SLC5A8/SLC29A4/ADCY8/SPTBN2/ERBB3/SHROOM4/NOD1/FN1/ANXA1/SORBS2/KCNK2/REN/RAB27A                                        | 14 |
|    |            |                                          |        |           |             |             |             | GRIN2C/GPM6A/ADCY8/PSD3/ITGA3/NRCAM/NRP2/CAMK2N1/PDLIM4/GABRB2/PALM/ANXA1/DGKI/SRCIN1/ADORA1                                    | 15 |



|    |            |                                                      |        |           |             |             |             |                                                                                |    |
|----|------------|------------------------------------------------------|--------|-----------|-------------|-------------|-------------|--------------------------------------------------------------------------------|----|
| CC | GO:0034702 | ion channel complex                                  | 12/267 | 301/19717 | 0.000868264 | 0.018626313 | 0.01460553  | CLCNKB/GRIN2C/CLCNKA/KCNIP3/KCNQ1/KCNQ3/EP8/GABRB2/TRPC5/KCNK2/SCN1B/KCNJ2     | 12 |
| CC | GO:0099572 | postsynaptic specialization                          | 13/267 | 348/19717 | 0.000973801 | 0.018626313 | 0.01460553  | GRIN2C/ADCY8/PSD3/GAP43/EP8/NRCAM/CAMK2N1/GABRB2/PALM/ITPR1/DGKI/SRCIN1/ADORA1 | 13 |
| CC | GO:0098978 | glutamatergic synapse                                | 13/267 | 349/19717 | 0.000999516 | 0.018626313 | 0.01460553  | GRIN2C/GPM6A/ADCY8/MYH10/NPTXR/IL1RAP/SPTBN2/EP8/NRCAM/NRP2/PPP1R1B/APOE/DGKI  | 13 |
| CC | GO:0098984 | neuron to neuron synapse                             | 13/267 | 350/19717 | 0.001025797 | 0.018626313 | 0.01460553  | GRIN2C/ADCY8/PSD3/GAP43/EP8/NRCAM/SYT12/CAMK2N1/PALM/ITPR1/DGKI/SRCIN1/ADORA1  | 13 |
| CC | GO:0009925 | basal plasma membrane                                | 4/267  | 34/19717  | 0.001107517 | 0.019104671 | 0.014980627 | ERBB3/SHROOM4/MET/TACSTD2                                                      | 4  |
| CC | GO:0009898 | cytoplasmic side of plasma membrane                  | 8/267  | 154/19717 | 0.001212773 | 0.019924132 | 0.015623195 | GNA14/STAC/NPTXR/SHROOM4/PLEKHA4/PALM/KIT/RGS8                                 | 8  |
| CC | GO:0034774 | secretory granule lumen                              | 12/267 | 321/19717 | 0.001503482 | 0.021424951 | 0.016800038 | CLU/QSOX1/TIMP1/PROS1/SERPINA1/FN1/CTSH/QPCT/RAB27A/CTSC/NPC2/CHI3L1           | 12 |
| CC | GO:0014069 | postsynaptic density                                 | 12/267 | 324/19717 | 0.001625563 | 0.021424951 | 0.016800038 | GRIN2C/ADCY8/PSD3/GAP43/EP8/NRCAM/CAMK2N1/PALM/ITPR1/DGKI/SRCIN1/ADORA1        | 12 |
| CC | GO:1902495 | transmembrane transporter complex                    | 12/267 | 324/19717 | 0.001625563 | 0.021424951 | 0.016800038 | CLCNKB/GRIN2C/CLCNKA/KCNIP3/KCNQ1/KCNQ3/EP8/GABRB2/TRPC5/KCNK2/SCN1B/KCNJ2     | 12 |
| CC | GO:0005793 | endoplasmic reticulum-Golgi intermediate compartment | 7/267  | 126/19717 | 0.001658964 | 0.021424951 | 0.016800038 | COPZ2/DCSTAMP/SERPINA1/FN1/MGAT4B/CTSC/TGFA                                    | 7  |
| CC | GO:0060205 | cytoplasmic vesicle lumen                            | 12/267 | 325/19717 | 0.001668027 | 0.021424951 | 0.016800038 | CLU/QSOX1/TIMP1/PROS1/SERPINA1/FN1/CTSH/QPCT/RAB27A/CTSC/NPC2/CHI3L1           | 12 |
| CC | GO:0031527 | filopodium membrane                                  | 3/267  | 18/19717  | 0.001723498 | 0.021424951 | 0.016800038 | ITGA3/GAP43/PALM                                                               | 3  |
| CC | GO:0031983 | vesicle lumen                                        | 12/267 | 327/19717 | 0.0017557   | 0.021424951 | 0.016800038 | CLU/QSOX1/TIMP1/PROS1/SERPINA1/FN1/CTSH/QPCT/RAB27A/CTSC/NPC2/CHI3L1           | 12 |
| CC | GO:0032279 | asymmetric synapse                                   | 12/267 | 328/19717 | 0.001800938 | 0.021424951 | 0.016800038 | GRIN2C/ADCY8/PSD3/GAP43/EP8/NRCAM/CAMK2N1/PALM/ITPR1/DGKI/SRCIN1/ADORA1        | 12 |
| CC | GO:1990351 | transporter complex                                  | 12/267 | 332/19717 | 0.001991583 | 0.022903201 | 0.017959184 | CLCNKB/GRIN2C/CLCNKA/KCNIP3/KCNQ1/KCNQ3/EP8/GABRB2/TRPC5/KCNK2/SCN1B/KCNJ2     | 12 |
| CC | GO:0098858 | actin-based cell projection                          | 9/267  | 208/19717 | 0.002179265 | 0.024253109 | 0.019017693 | IQGAP2/GPM6A/NPTXR/ITGA3/GAP43/EP8/ESPN/PALM/SRCIN1                            | 9  |
| CC | GO:0033116 | endoplasmic reticulum-Golgi intermediate compartment | 5/267  | 71/19717  | 0.002758268 | 0.029737579 | 0.023318254 | COPZ2/DCSTAMP/SERPINA1/CTSC/TGFA                                               | 5  |
| CC | GO:0098562 | membrane cytoplasmic side of                         | 8/267  | 178/19717 | 0.003006071 | 0.031427111 | 0.024643074 | GNA14/STAC/NPTXR/SHROOM4/PLEKHA4/PALM/KIT/RGS8                                 | 8  |
| CC | GO:0034703 | cation channel complex                               | 9/267  | 220/19717 | 0.003171723 | 0.032183662 | 0.025236312 | GRIN2C/KCNIP3/KCNQ1/KCNQ3/EP8/TRPC5/KCNK2/SCN1B/KCNJ2                          | 9  |
| CC | GO:0060076 | excitatory synapse                                   | 4/267  | 50/19717  | 0.004645076 | 0.045359923 | 0.035568269 | ADCY8/SPTBN2/ITGA3/DGKI                                                        | 4  |
| CC | GO:0045211 | postsynaptic membrane                                | 11/267 | 323/19717 | 0.004733209 | 0.045359923 | 0.035568269 | GRIN2C/ADCY8/PSD3/NRCAM/NRP2/CAMK2N1/PDLIM4/GABRB2/DGKI/SRCIN1/ADORA1          | 11 |

|    |            |                                            |        |           |             |             |             |                                                                                                                     |    |
|----|------------|--------------------------------------------|--------|-----------|-------------|-------------|-------------|---------------------------------------------------------------------------------------------------------------------|----|
| CC | GO:0045178 | basal part of cell                         | 4/267  | 51/19717  | 0.004987677 | 0.046506714 | 0.036467507 | ERBB3/SHROOM4/MET/TACSTD2                                                                                           | 4  |
| MF | GO:1901681 | sulfur compound binding                    | 14/255 | 250/17696 | 1.68E-05    | 0.008853197 | 0.007922166 | SOD3/OGDHL/GSTM3/PGF/ACACB/FBLN7/NRP2/FN1/PC/RSPO4/NELL2/APOE/MDK/LIPH                                              | 14 |
| MF | GO:0008201 | heparin binding                            | 10/255 | 169/17696 | 0.000174137 | 0.033729711 | 0.030182584 | SOD3/PGF/FBLN7/NRP2/FN1/RSPO4/NELL2/APOE/MDK/LIPH                                                                   | 10 |
| MF | GO:0022803 | passive transmembrane transporter activity | 18/255 | 475/17696 | 0.00019201  | 0.033729711 | 0.030182584 | SLC26A7/SLC5A8/CLCNKB/GRIN2C/GPM6A/CLCNKA/KCNIP3/KCNQ1/KCNQ3/GJB3/GABRB2/SLC24A3/TRPC5/ITPR1/KCNK2/SCN1B/TMC6/KCNJ2 | 18 |
| MF | GO:0005543 | phospholipid binding                       | 16/255 | 427/17696 | 0.000491136 | 0.039526962 | 0.035370177 | IQGAP2/SYTL3/MAP1LC3A/KCNQ1/SPTBN2/GAP43/MFGE8/SYT12/PLEKHA4/ANXA1/BAIAP3/GRB7/APOE/ITPR1/PLA2G7/KCNJ2              | 16 |
| MF | GO:0005539 | glycosaminoglycan binding                  | 11/255 | 229/17696 | 0.000506409 | 0.039526962 | 0.035370177 | SOD3/PGF/FBLN7/NRP2/NOD1/FN1/RSPO4/NELL2/APOE/MDK/LIPH                                                              | 11 |
| MF | GO:0015267 | channel activity                           | 17/255 | 474/17696 | 0.000541396 | 0.039526962 | 0.035370177 | SLC26A7/CLCNKB/GRIN2C/GPM6A/CLCNKA/KCNIP3/KCNQ1/KCNQ3/GJB3/GABRB2/SLC24A3/TRPC5/ITPR1/KCNK2/SCN1B/TMC6/KCNJ2        | 17 |
| MF | GO:0017154 | semaphorin receptor activity               | 3/255  | 12/17696  | 0.000590884 | 0.039526962 | 0.035370177 | PLXNC1/NRP2/MET                                                                                                     | 3  |
| MF | GO:0005216 | ion channel activity                       | 16/255 | 435/17696 | 0.00060003  | 0.039526962 | 0.035370177 | SLC26A7/CLCNKB/GRIN2C/GPM6A/CLCNKA/KCNIP3/KCNQ1/KCNQ3/GABRB2/SLC24A3/TRPC5/ITPR1/KCNK2/SCN1B/TMC6/KCNJ2             | 16 |
| MF | GO:0019838 | growth factor binding                      | 8/255  | 137/17696 | 0.000842212 | 0.049316166 | 0.044129916 | IGFBPL1/TGFBR1/ERBB3/NRP2/NGFR/CD109/VASN/IGFBP6                                                                    | 8  |
